# Supplementary material for: Strong Components of Epigenetic Memory in Cultured Human Fibroblasts Related to Site of Origin and Donor Age
Source: PLOS journal article supplement (doi:10.1371/journal.pgen.1005819), 2016-02-25

# HOXD3; 0bp from tss:overlaps 5'

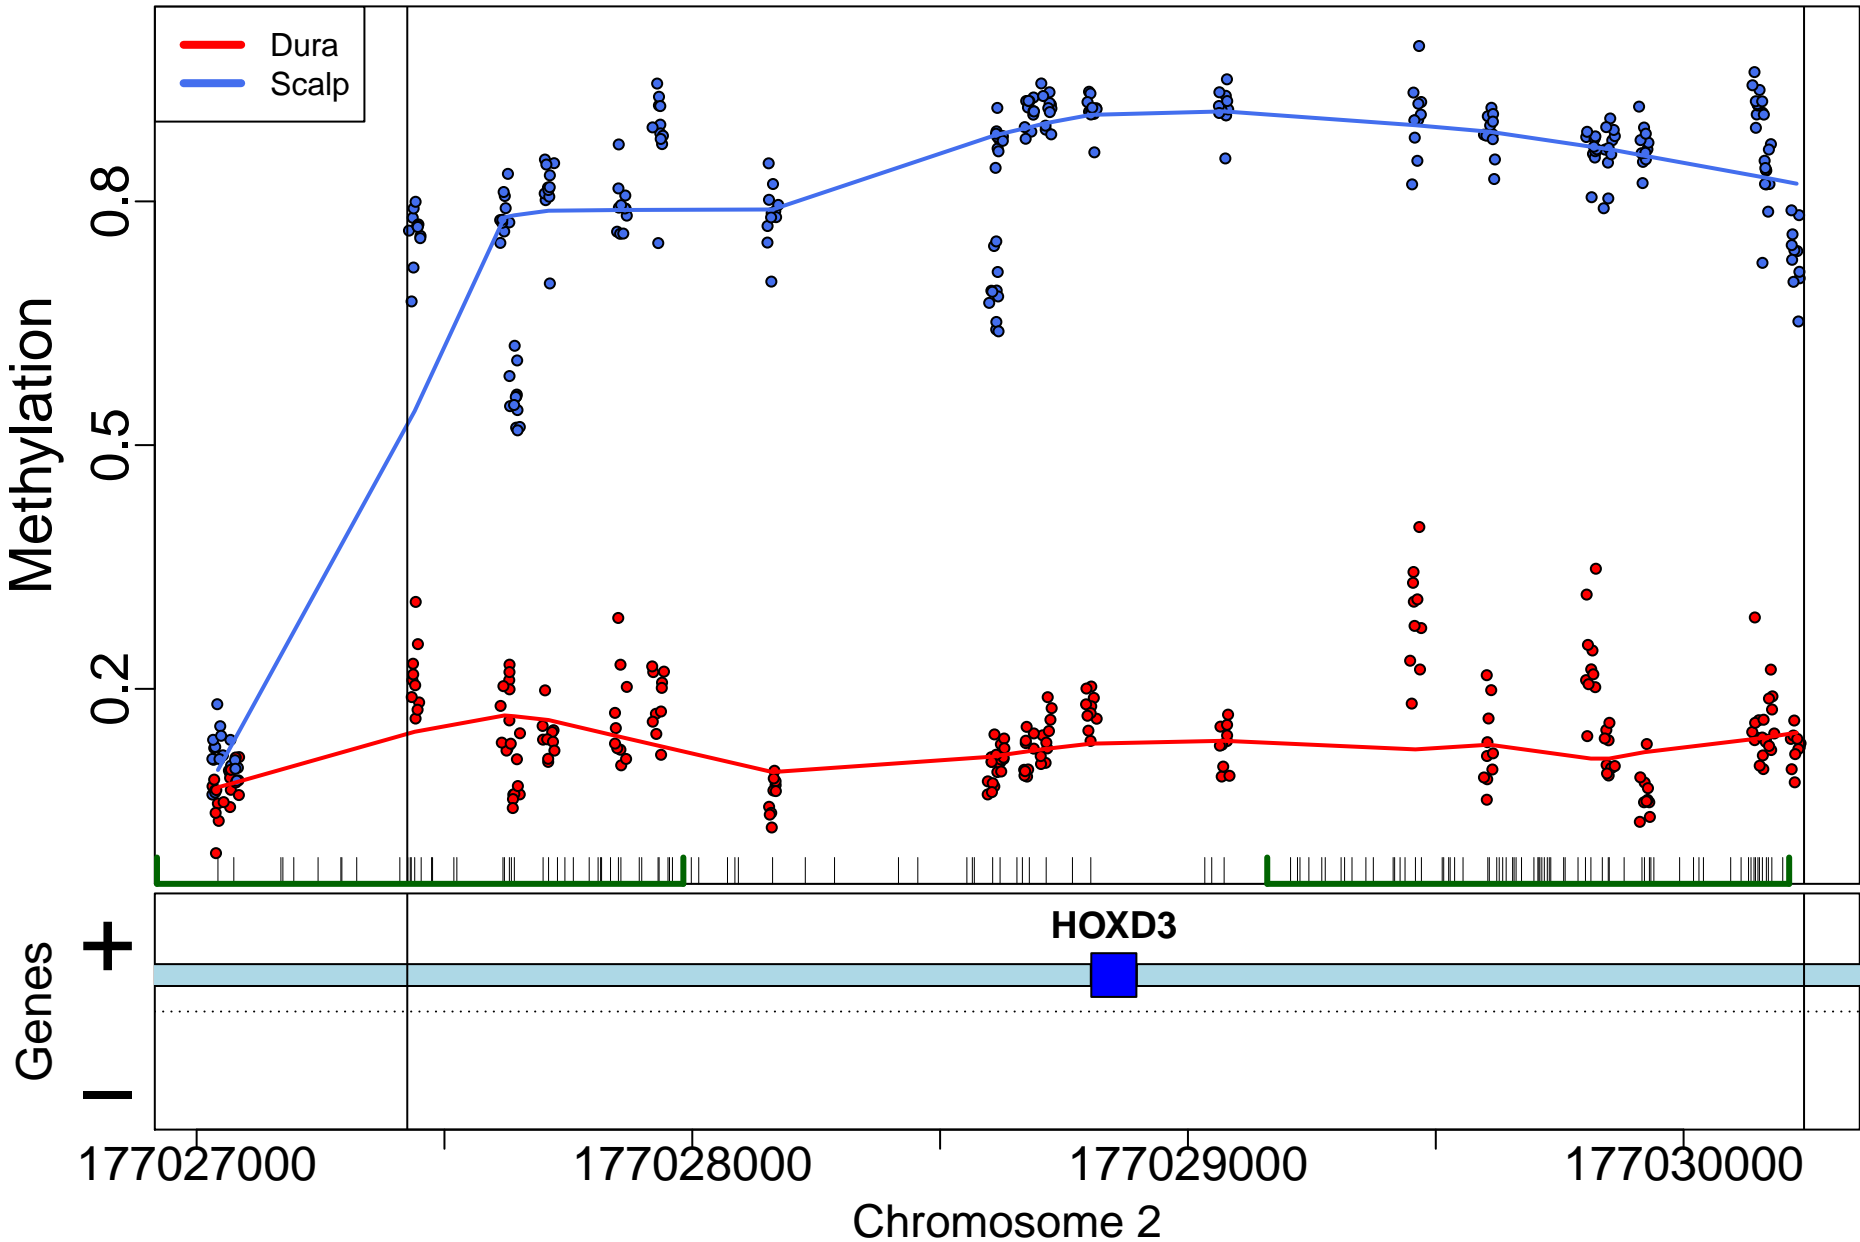

## SIM1; 5910bp from tss:inside intron

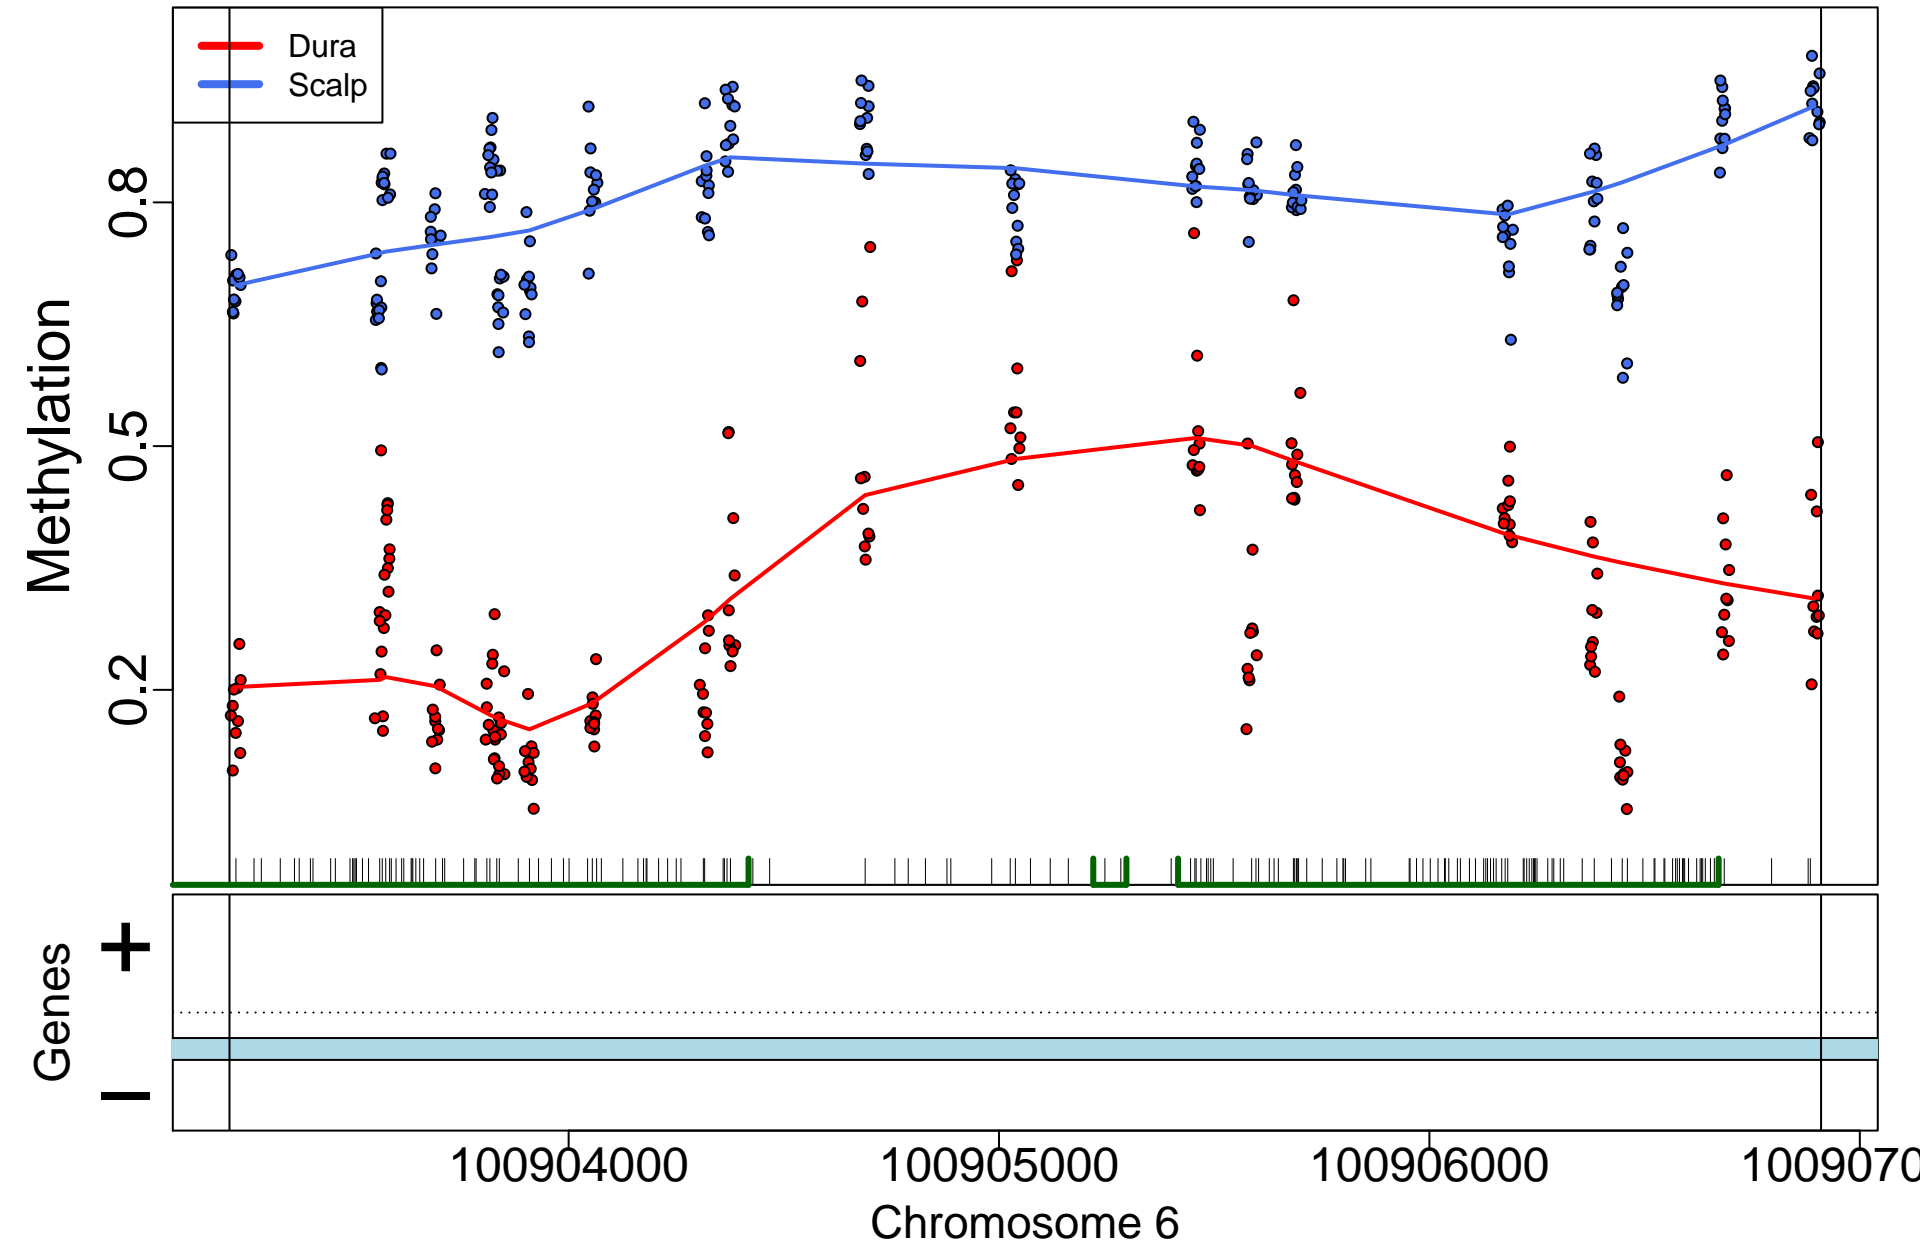

# RUNX3; 32933bp from tss:inside intron

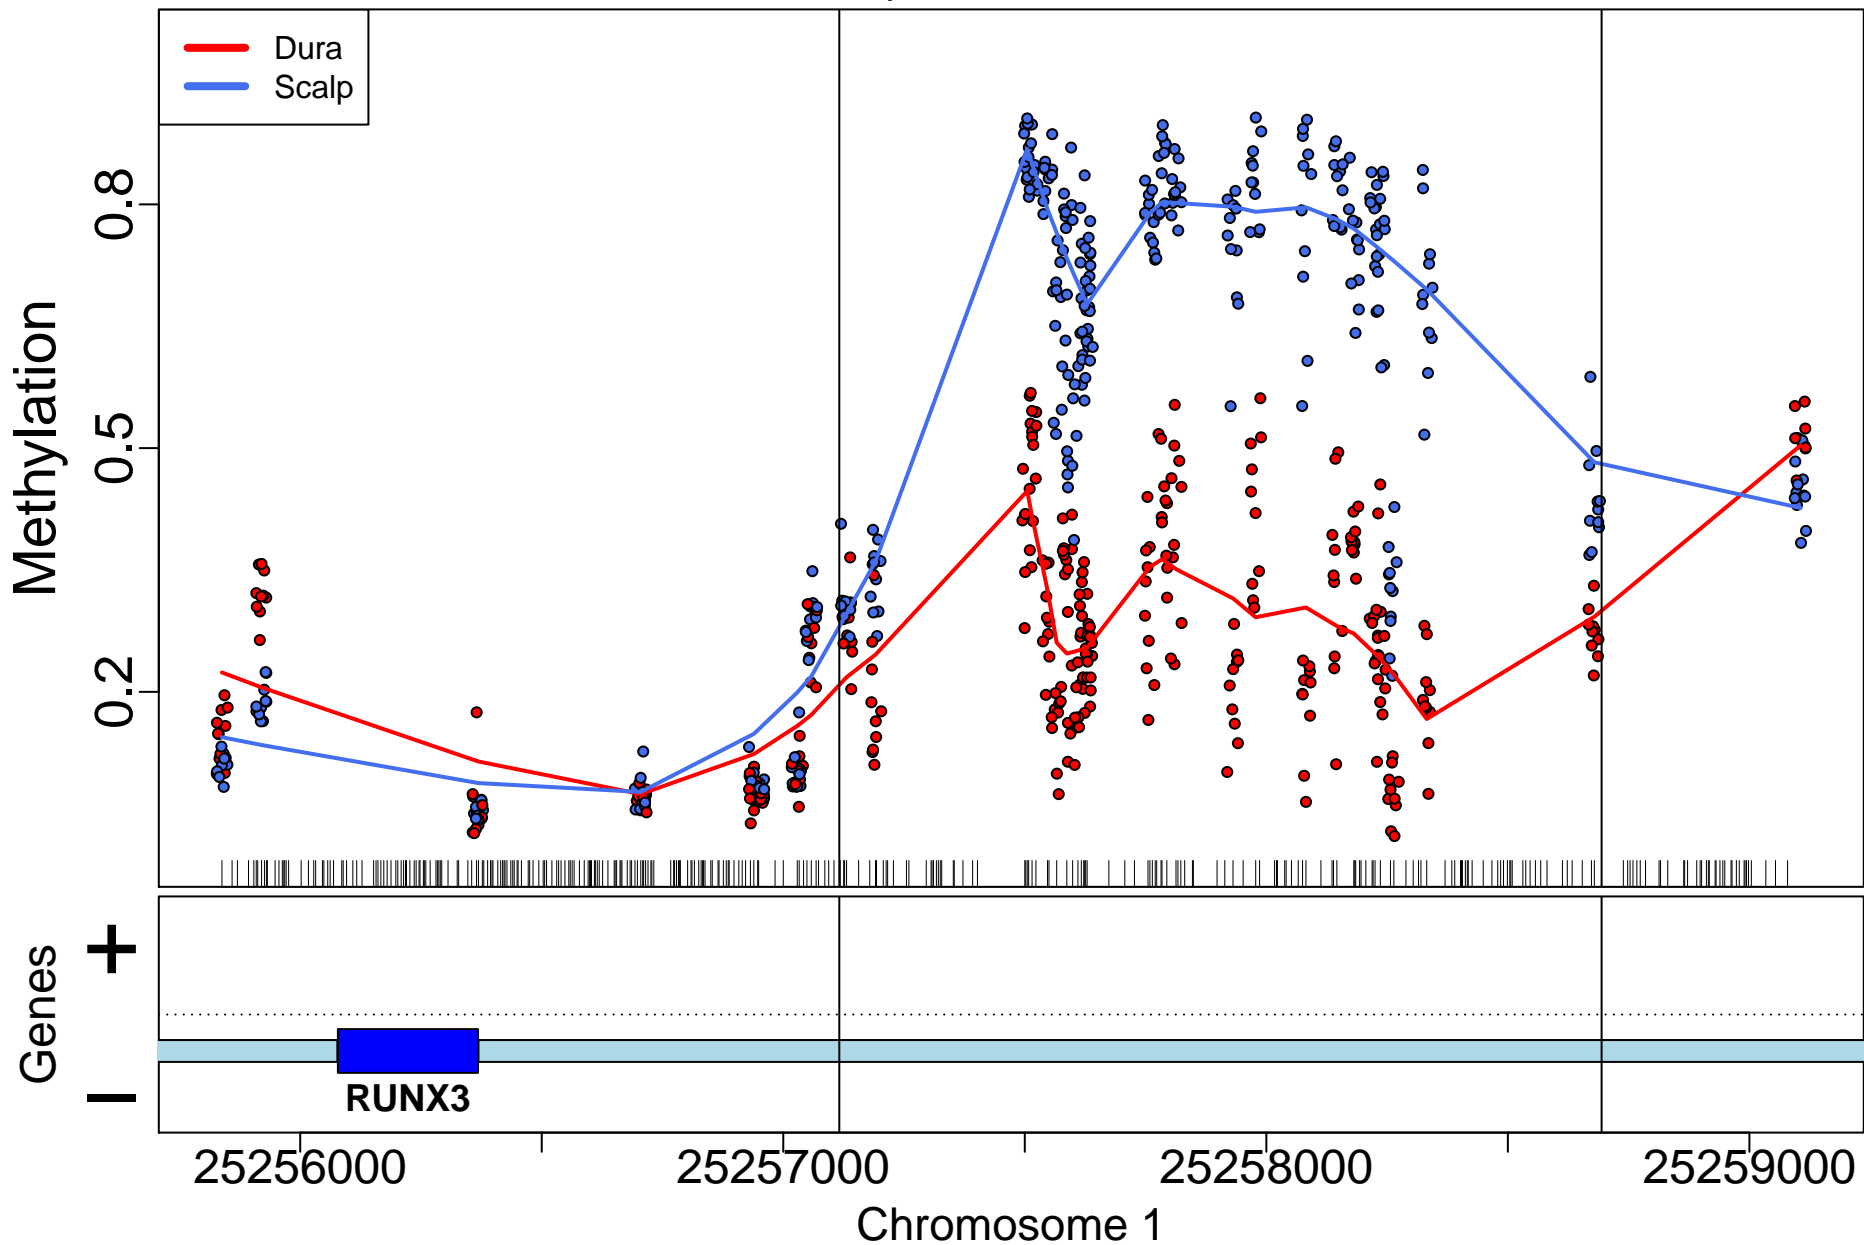

MIR10B; 0bp from tss:NA

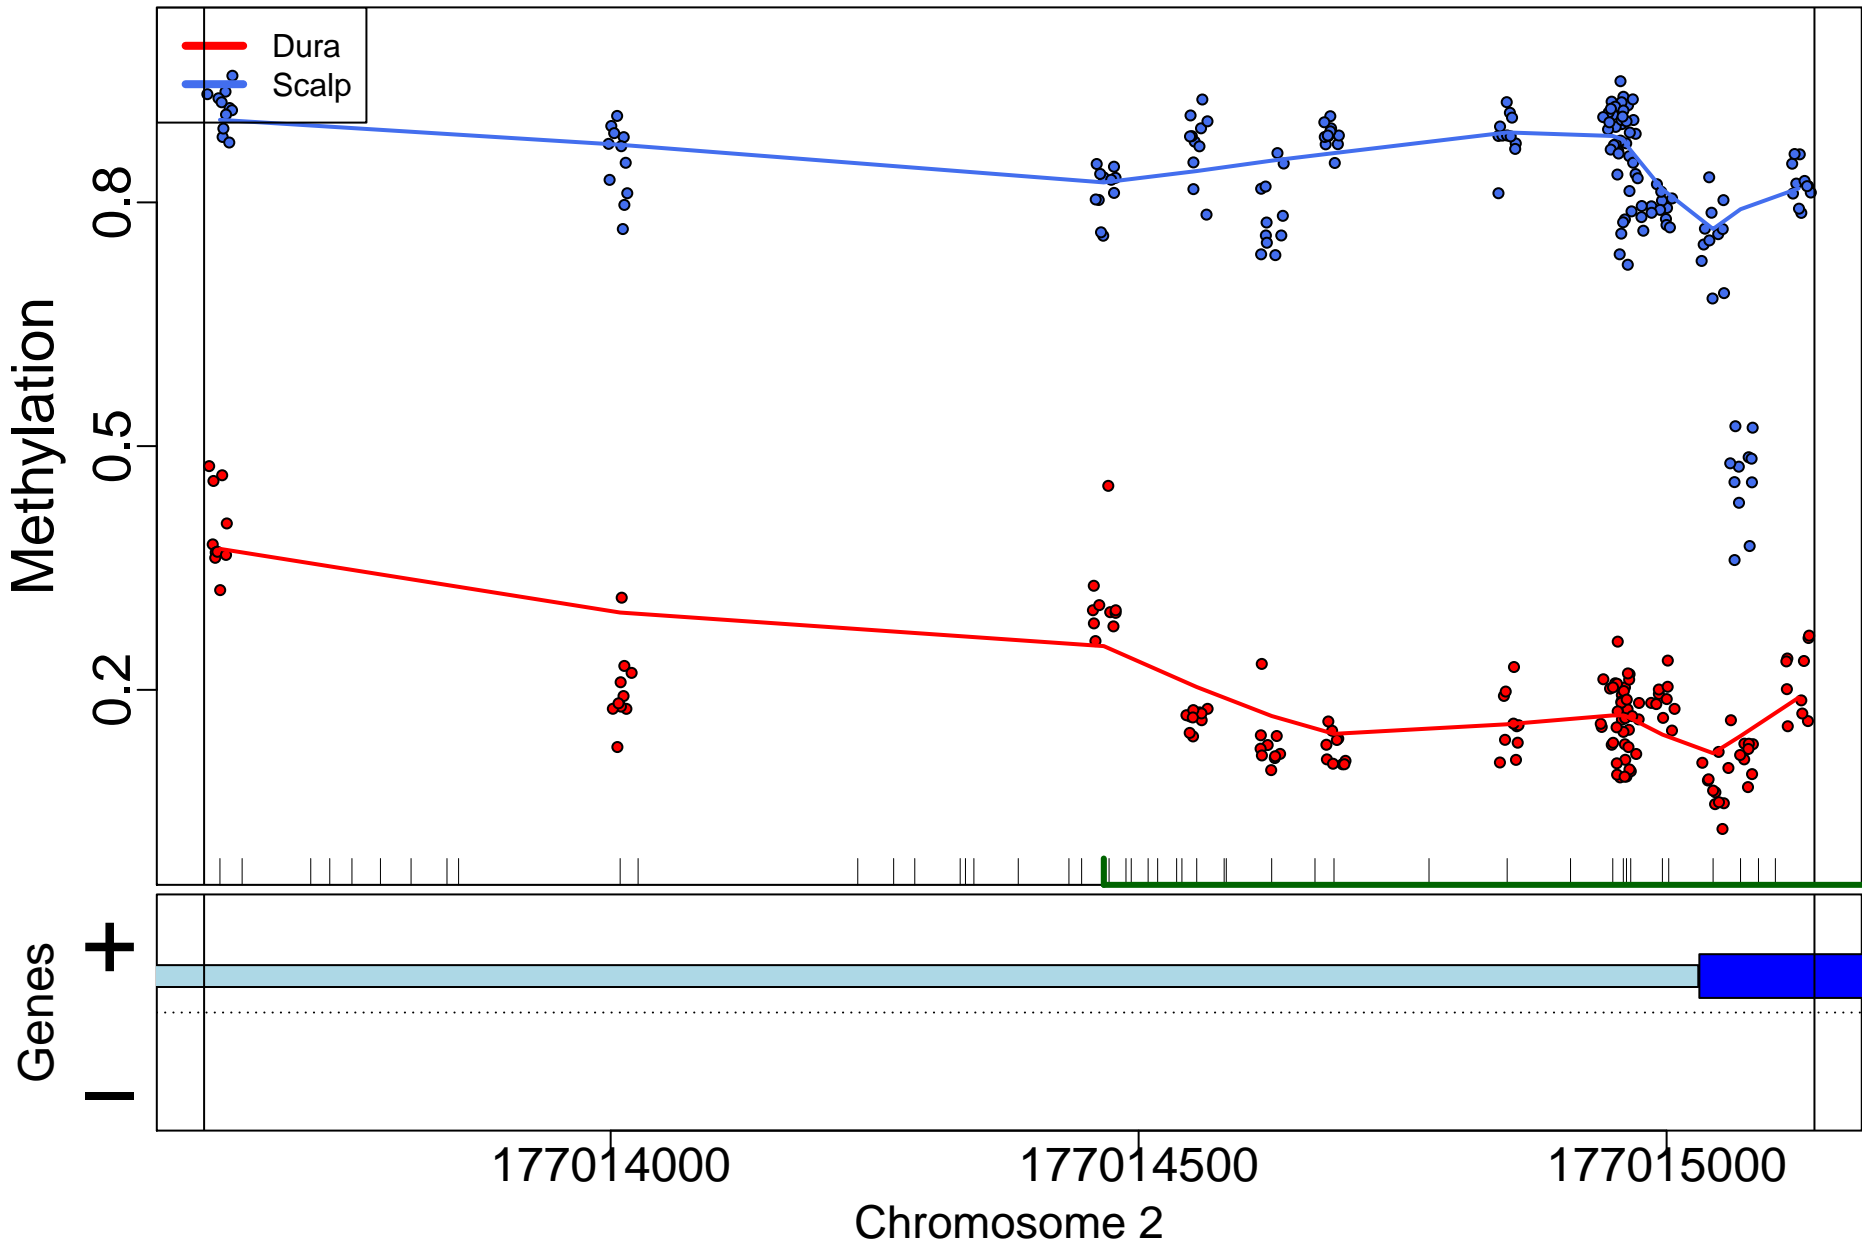

## SIM1; 15360bp from tss:covers exon(s)

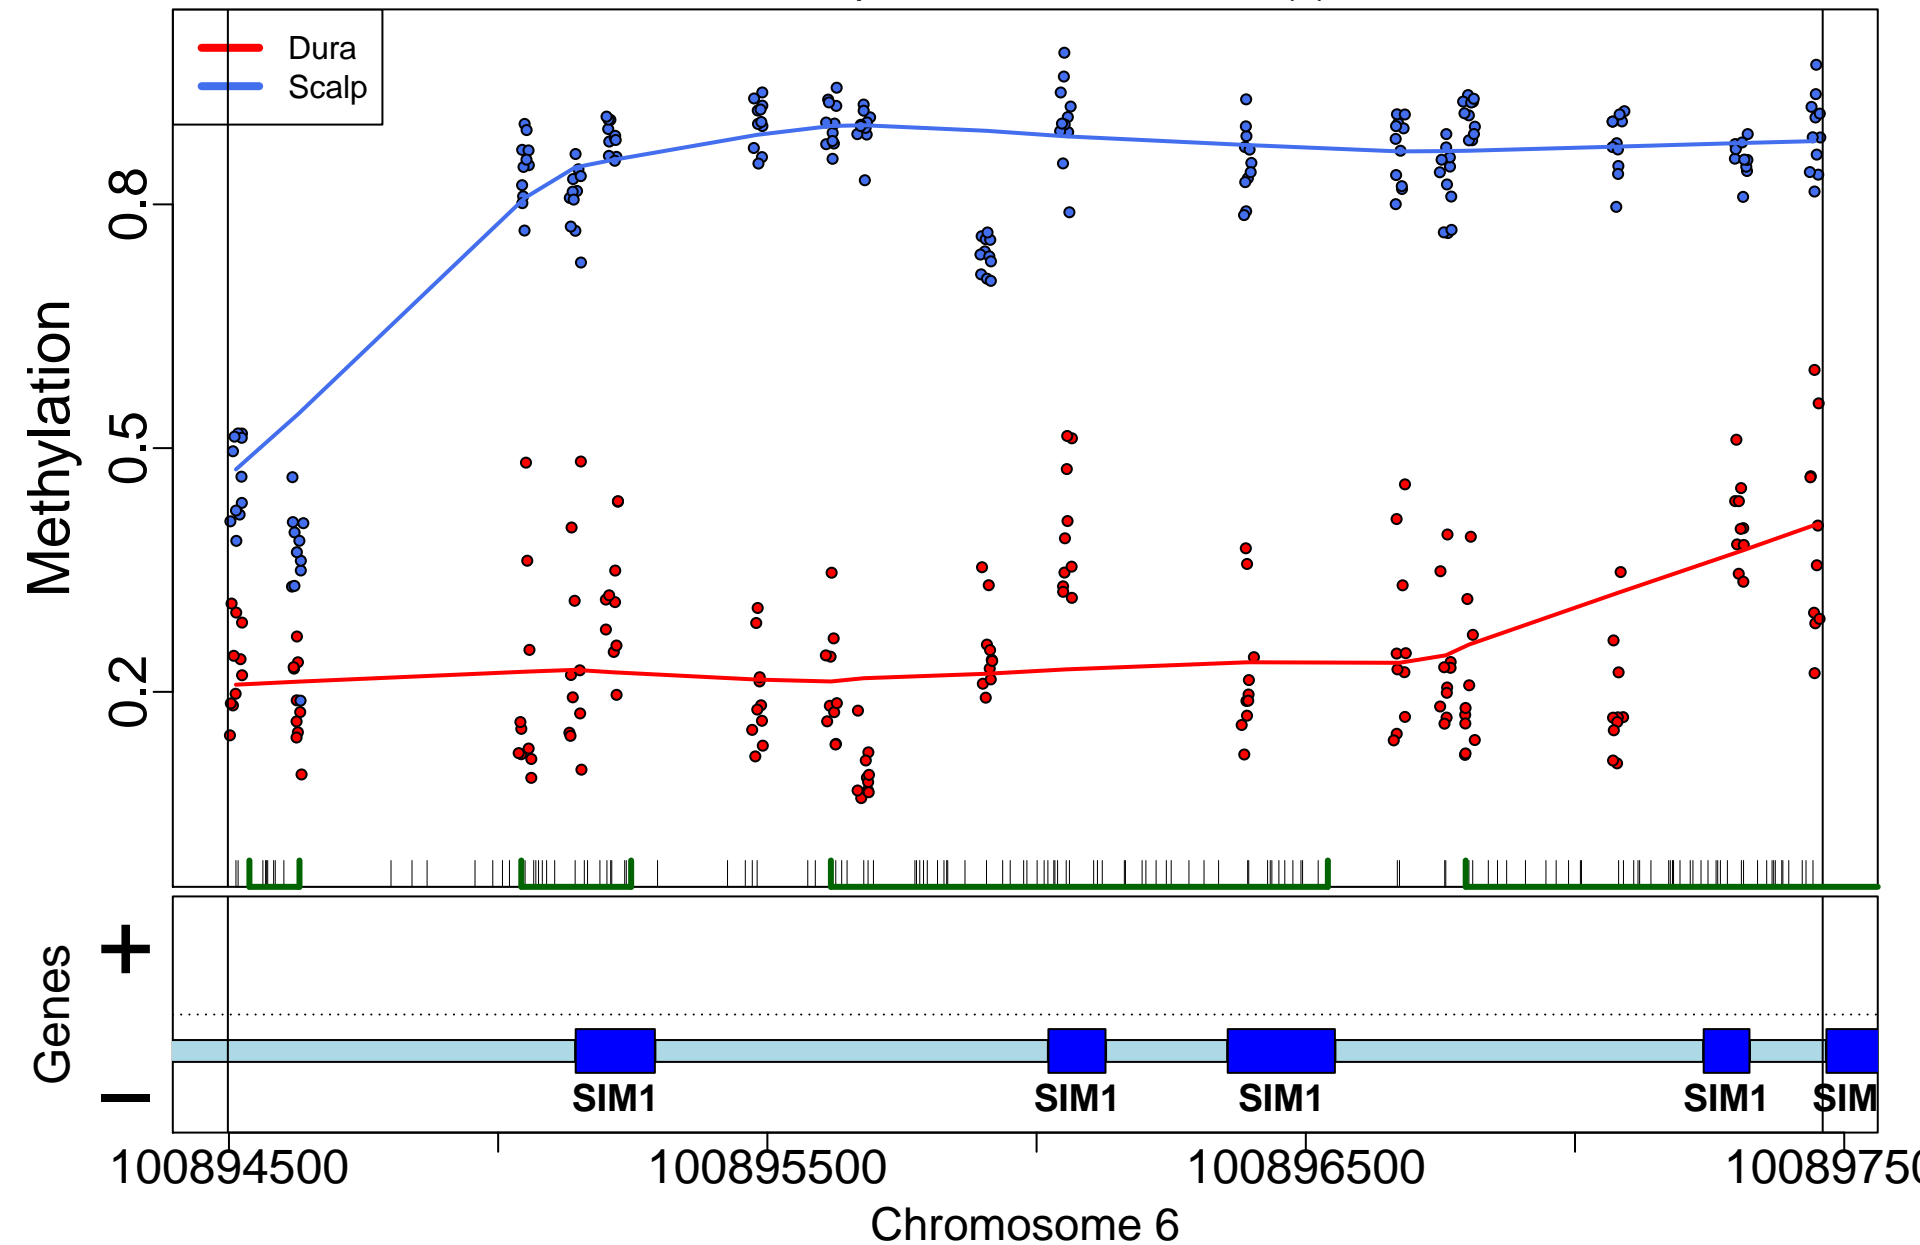

HOXB3; 37827bp from tss:covers exon(s)

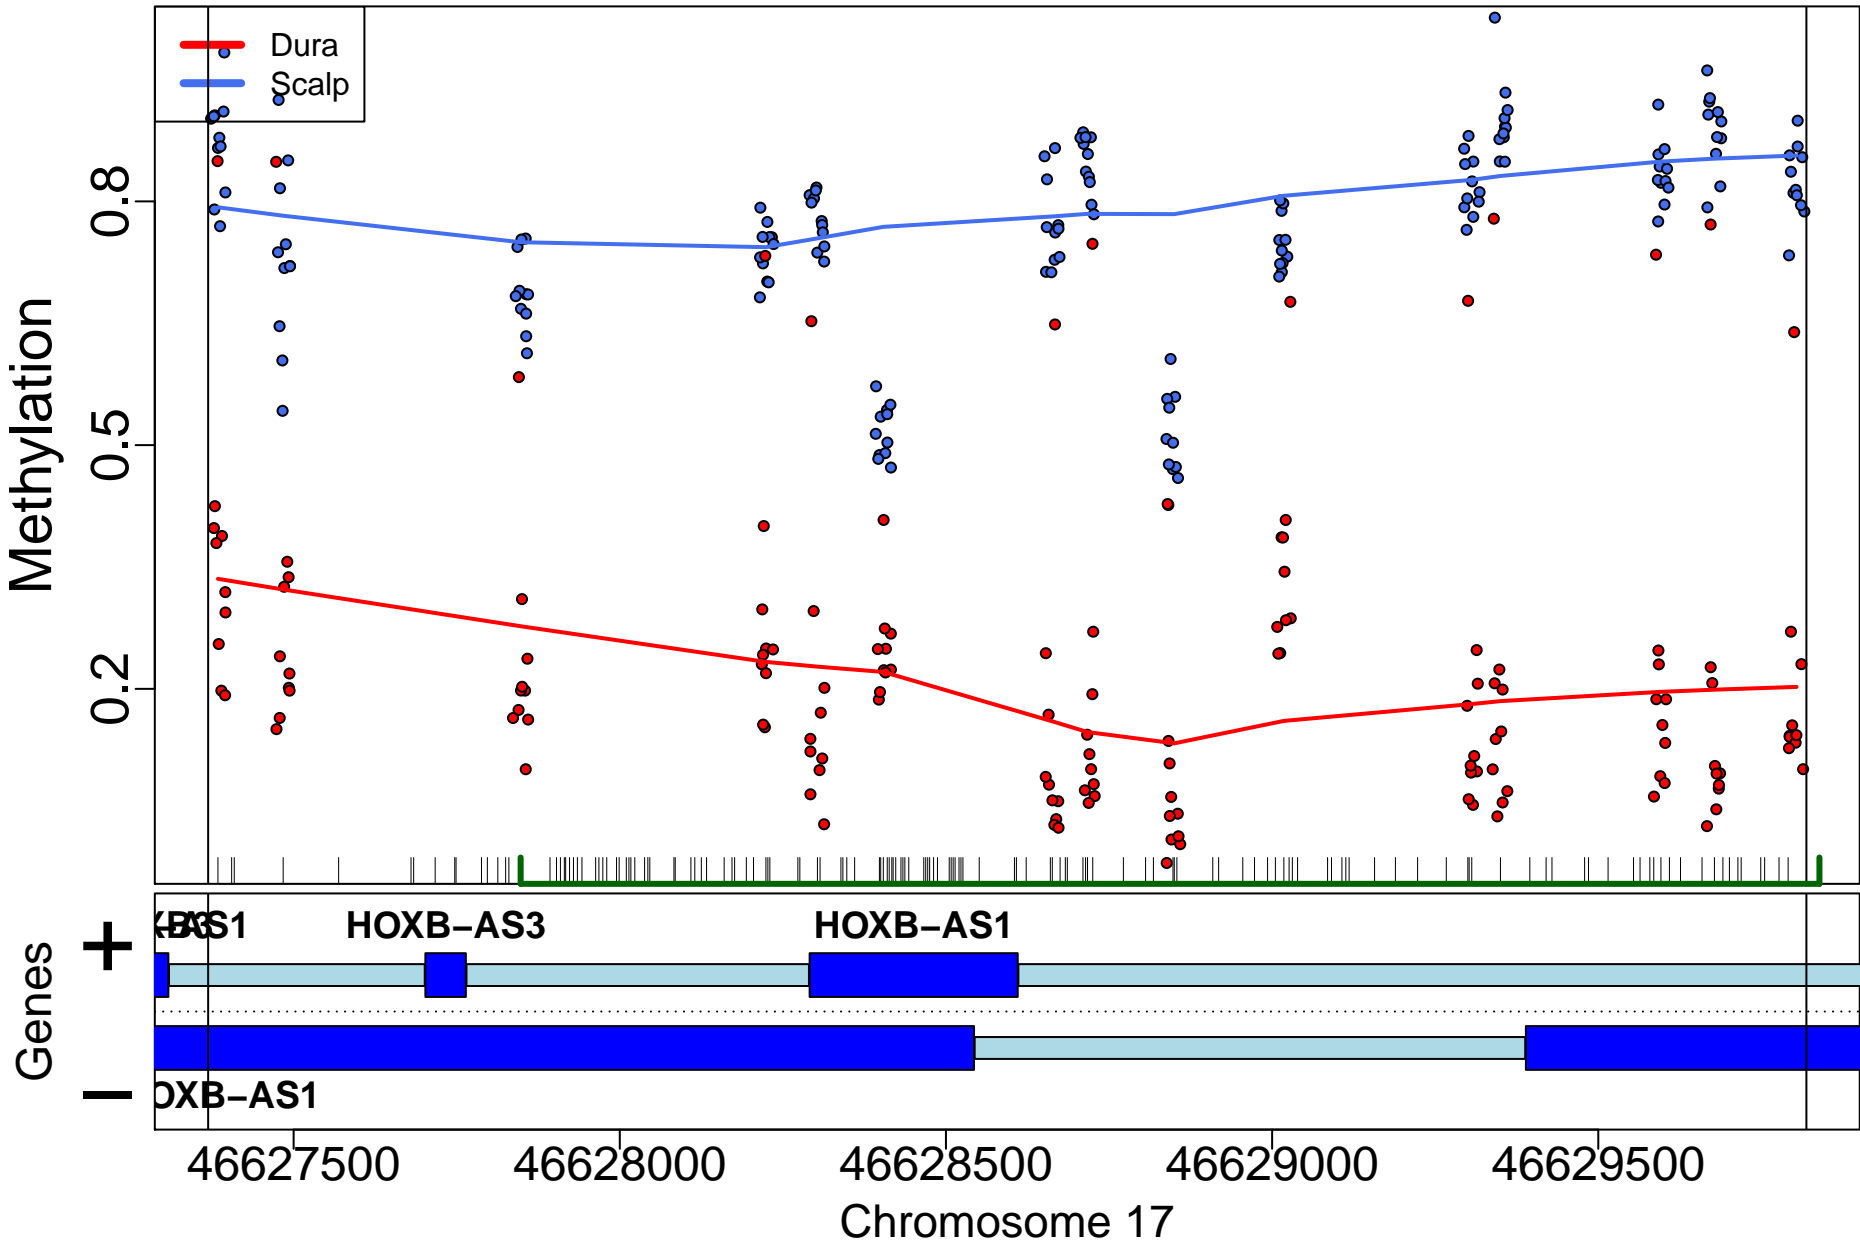

# HOXD4; 0bp from tss:overlaps 5'

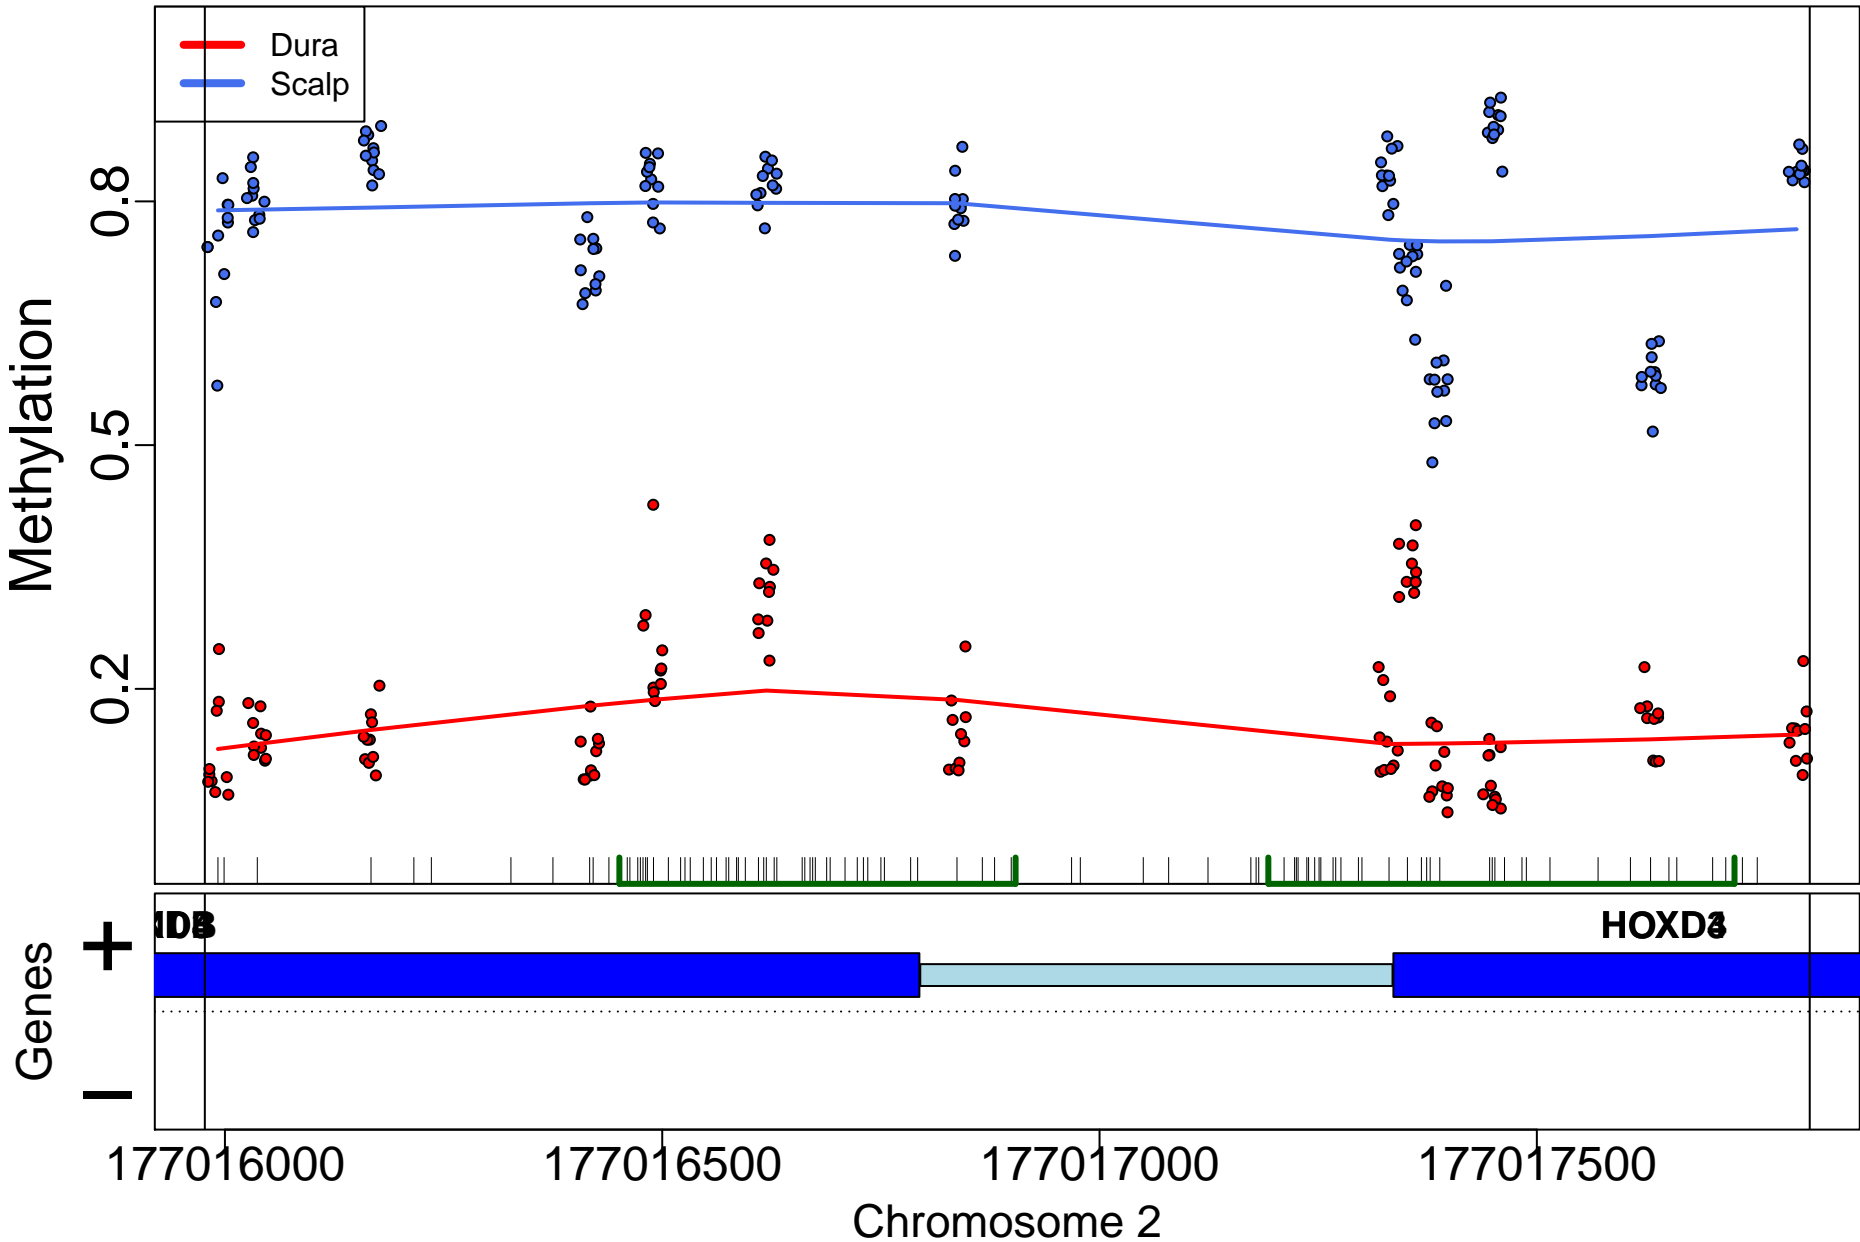

HOXB1; 0bp from tss:overlaps 5'

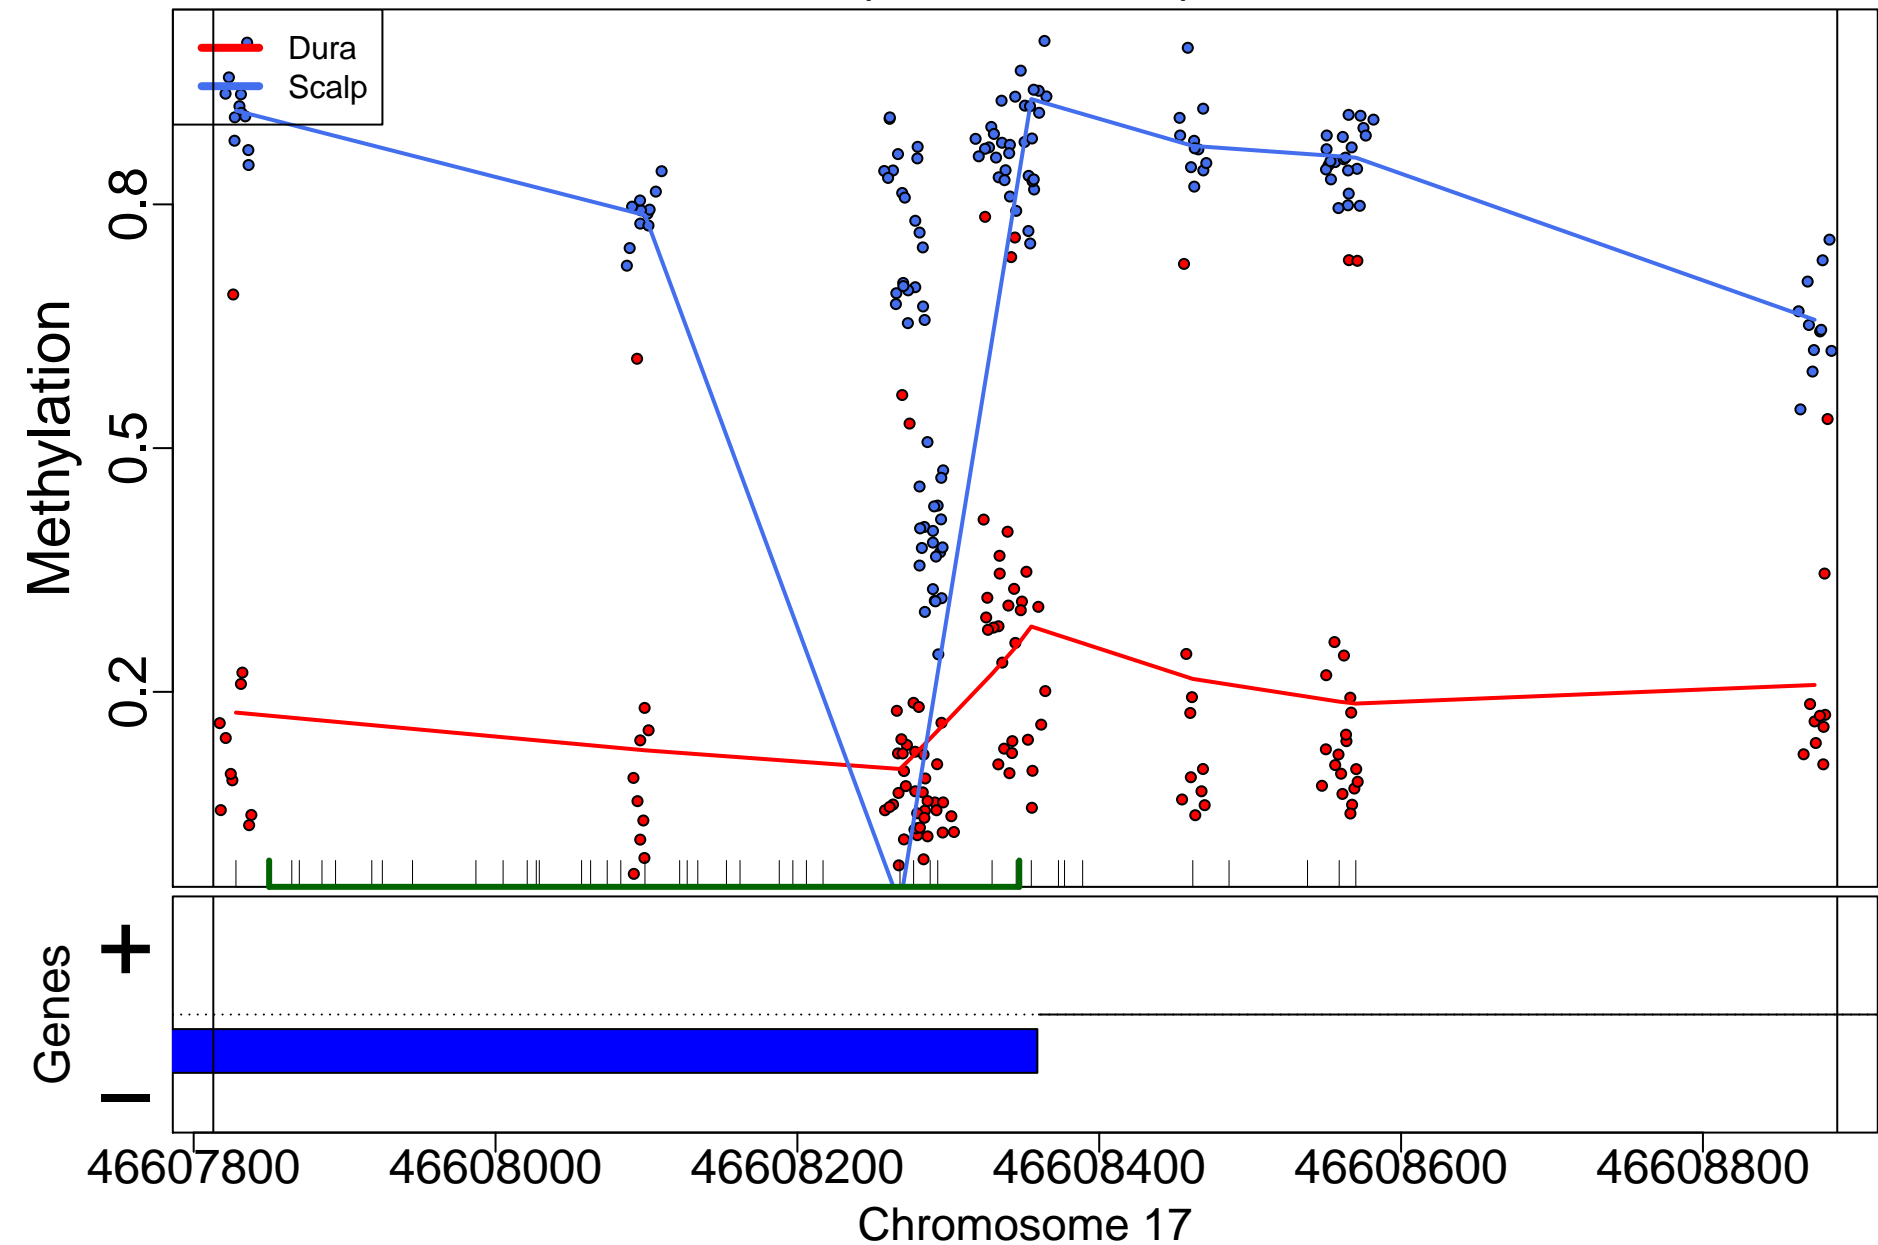



# SIM1; 787bp from tss:promoter

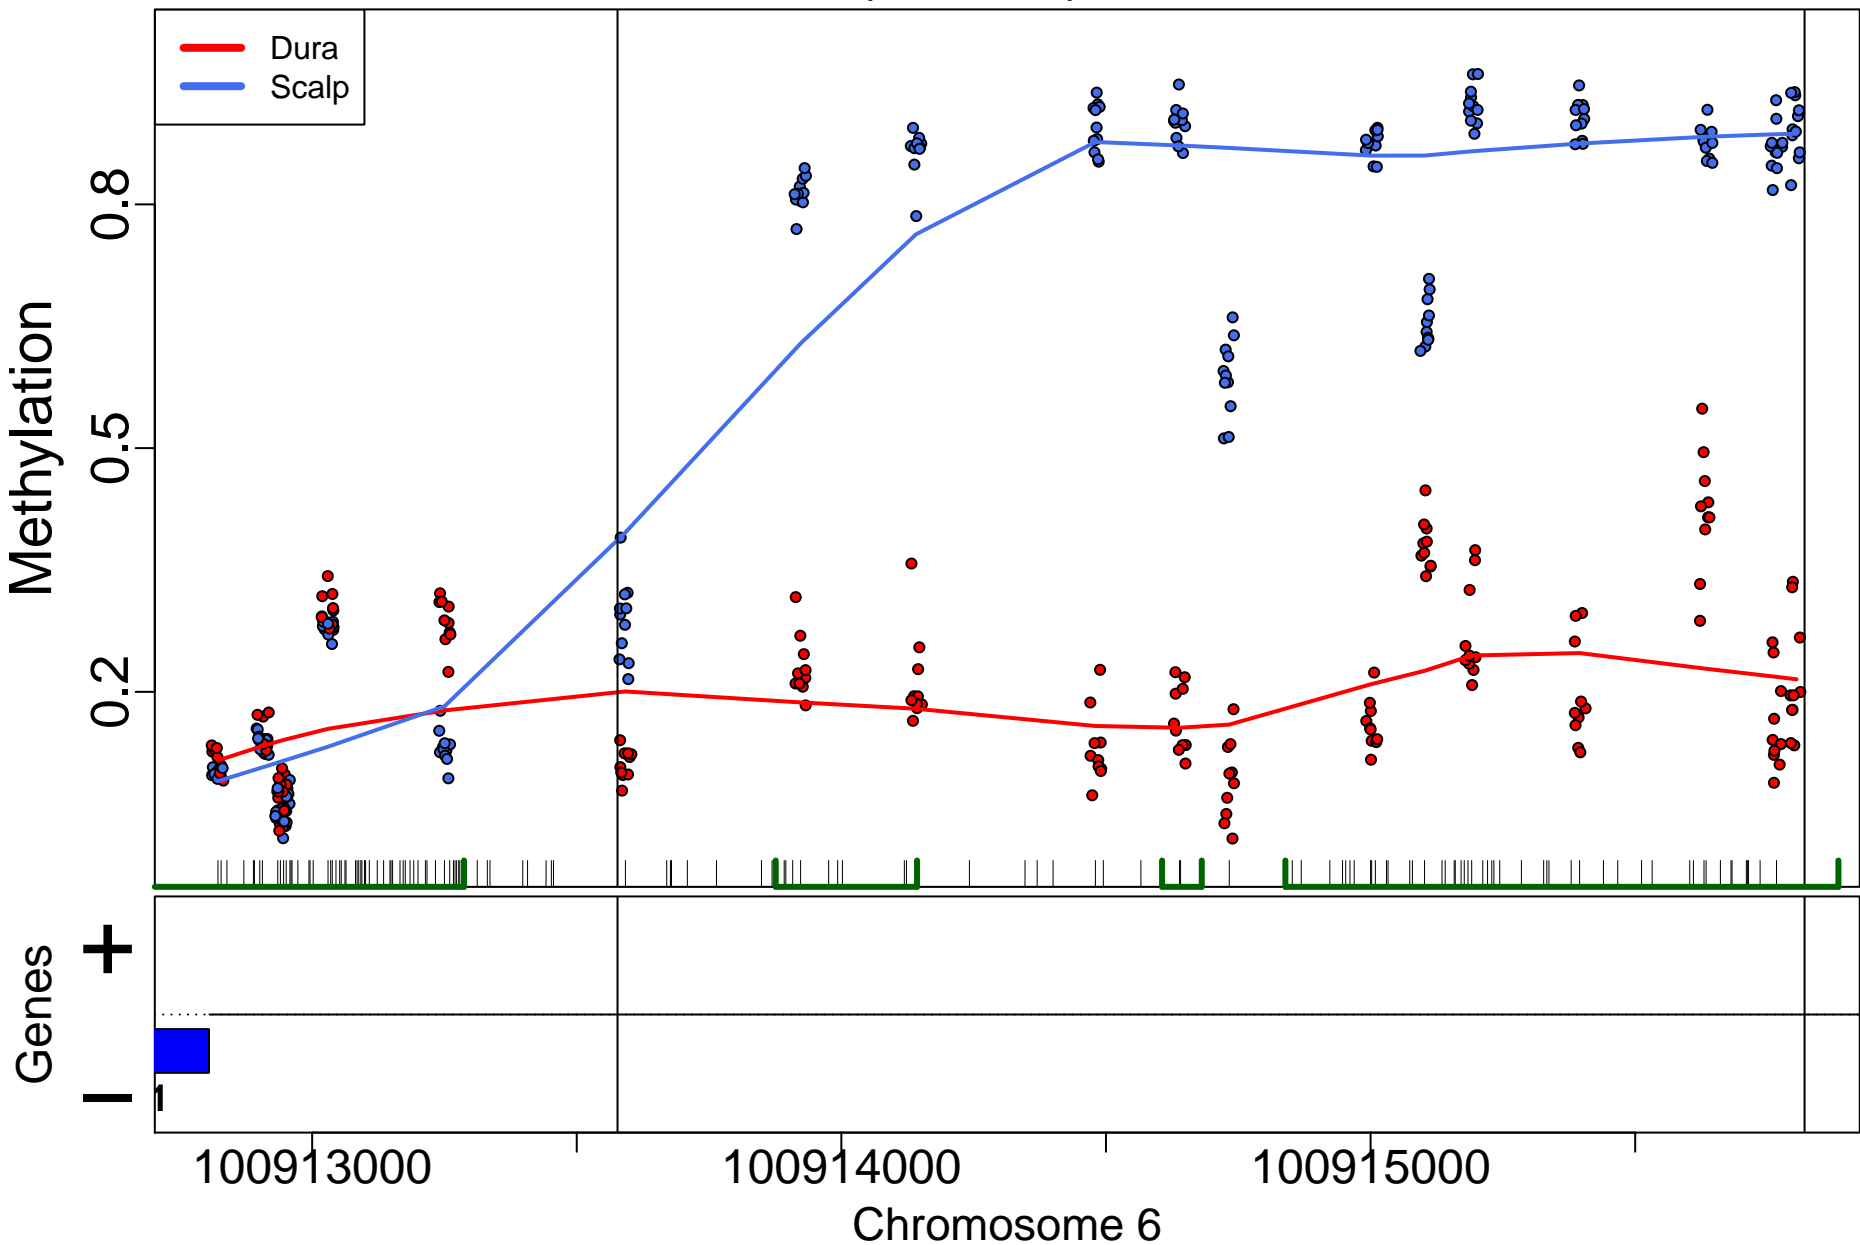

MSX1; 694bp from tss:promoter

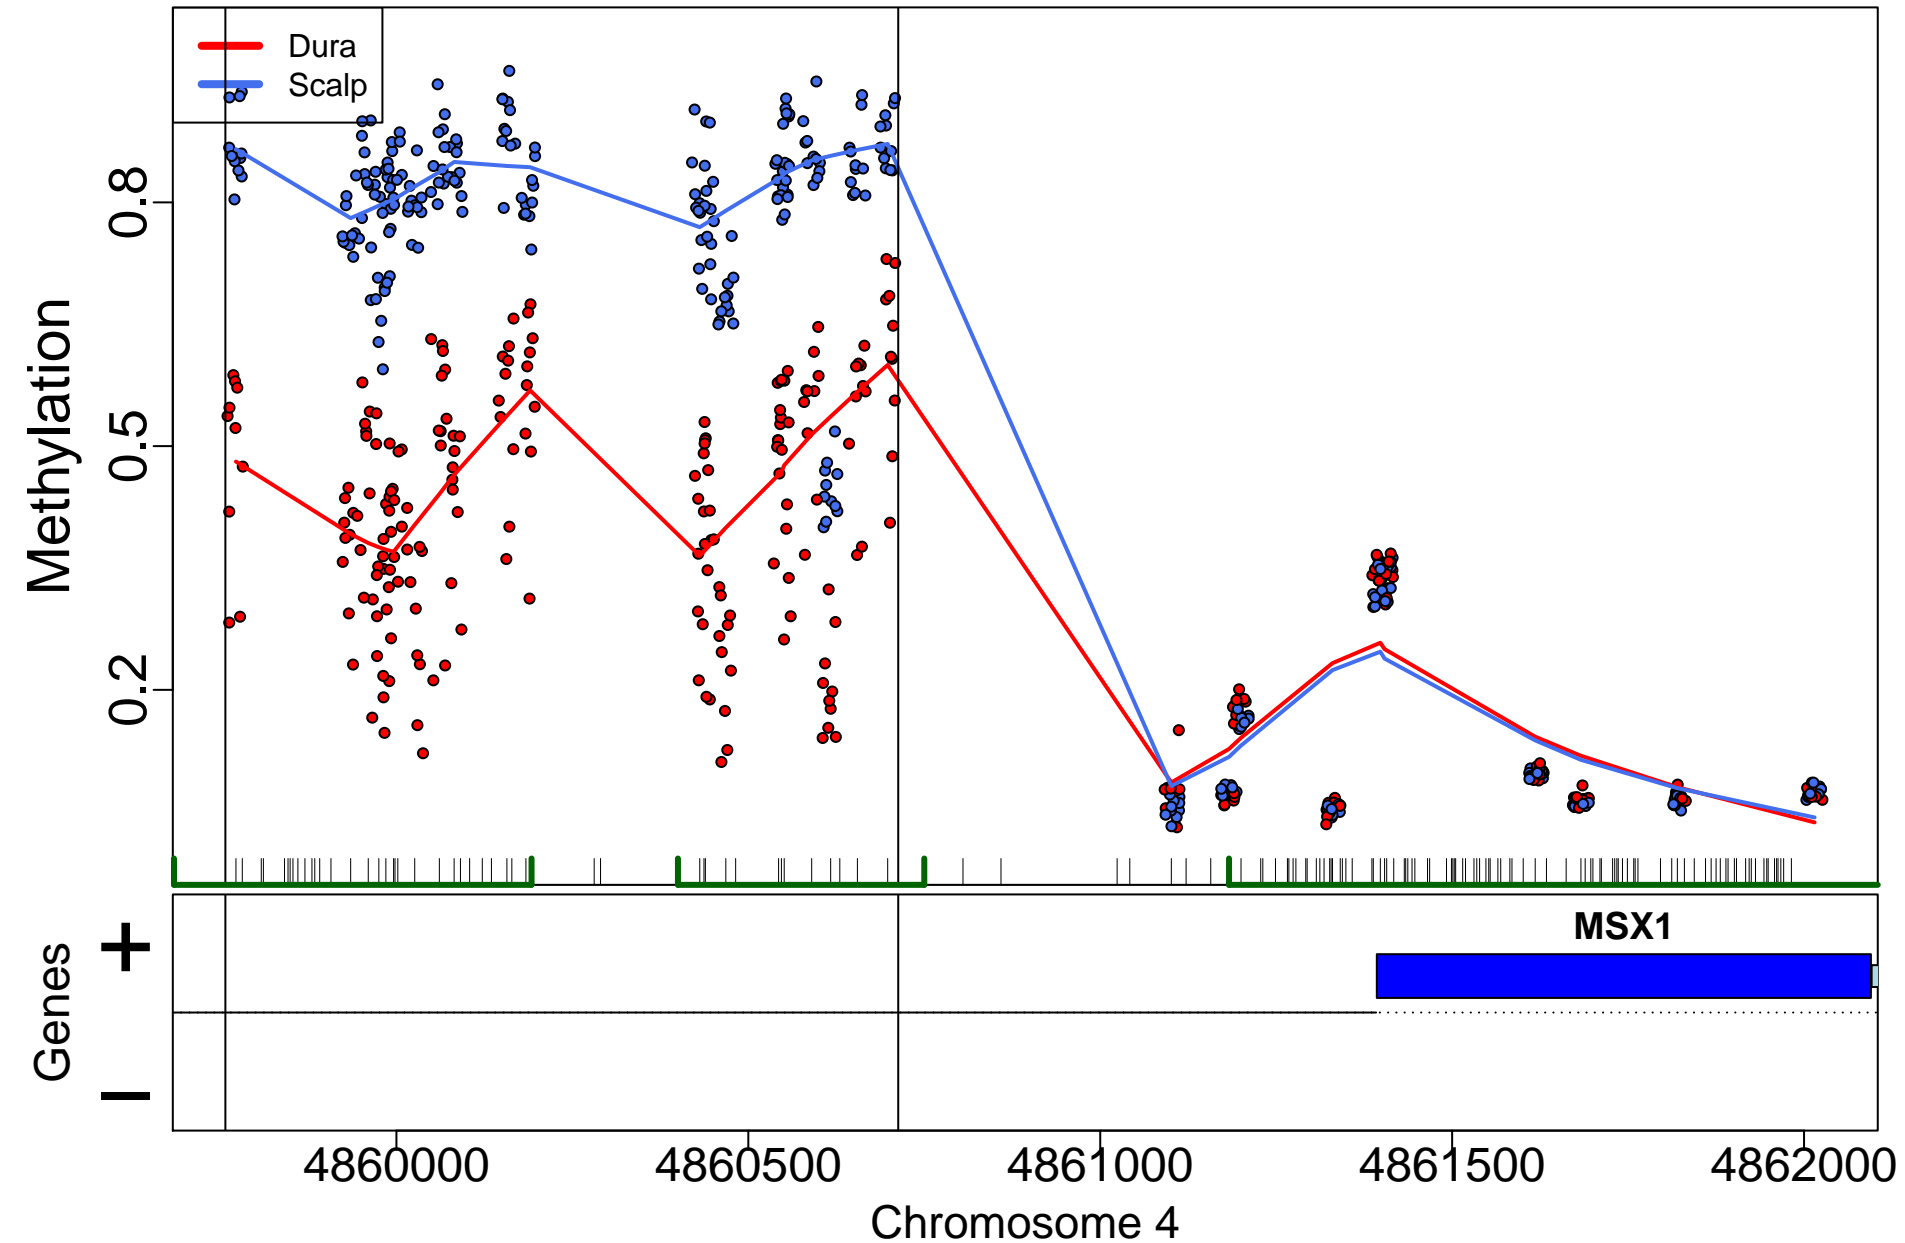

PRDM6; 0bp from tss:NA

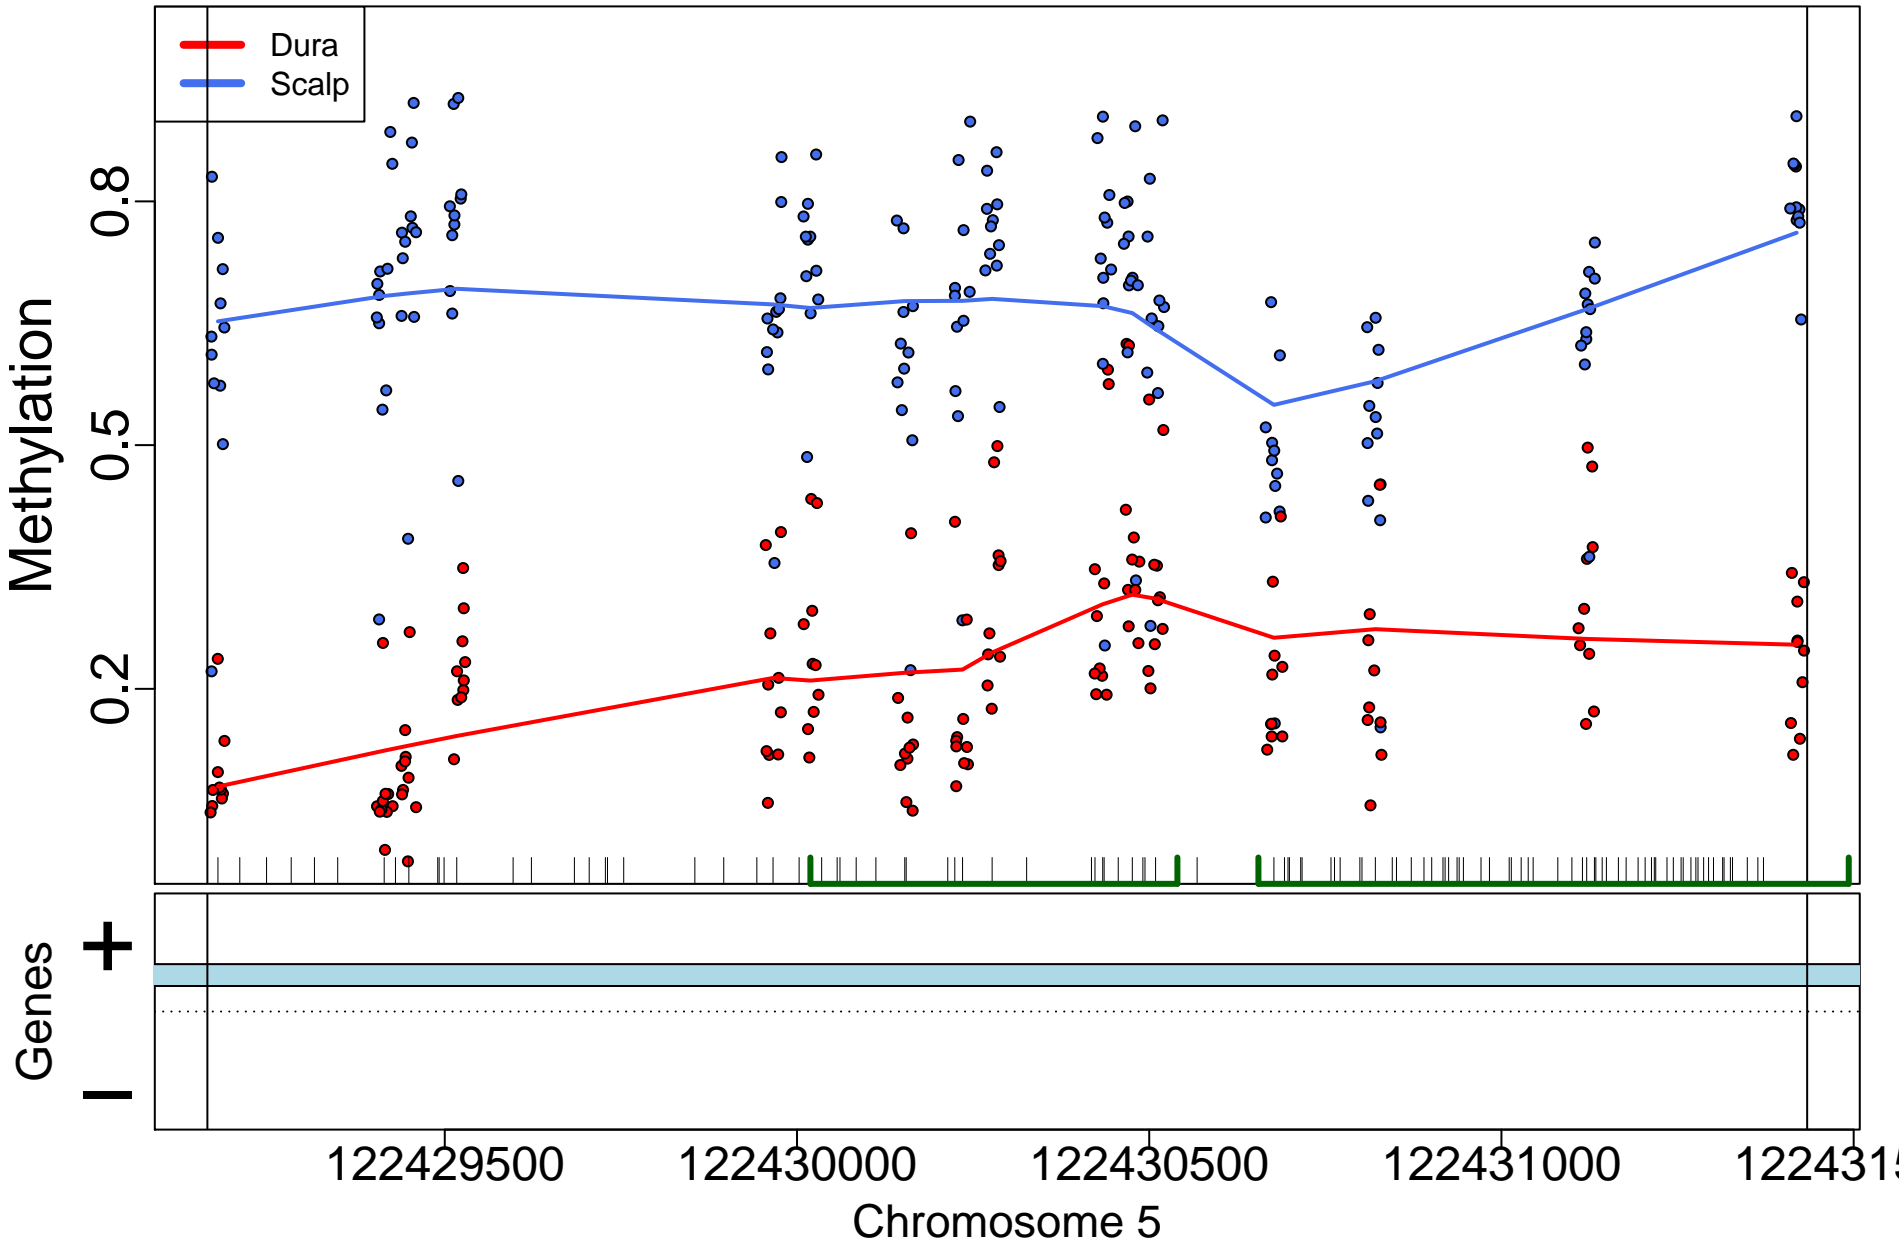

MSX1; 1890bp from tss:overlaps exon upstream

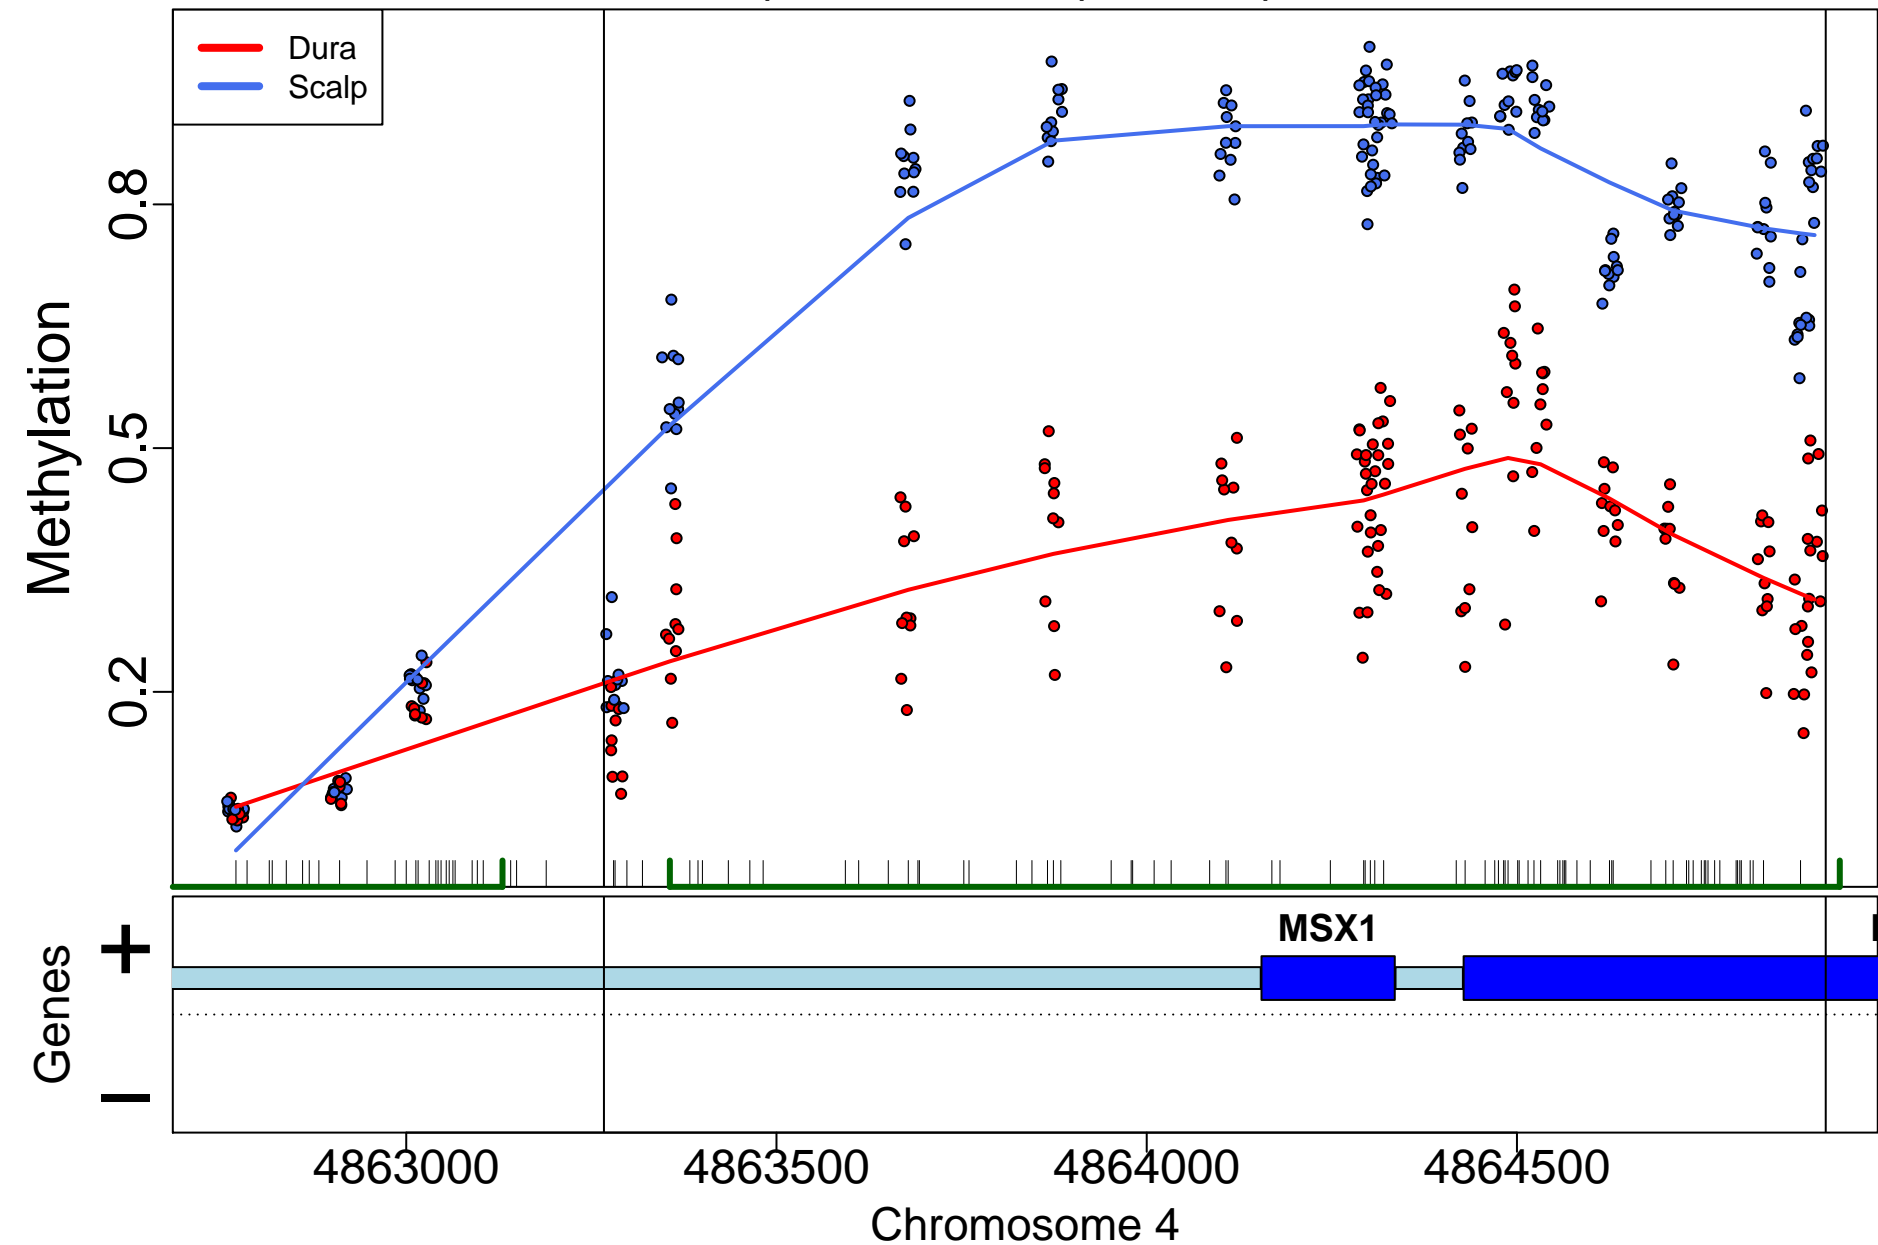

## HOXB4; 2805bp from tss:overlaps 3'

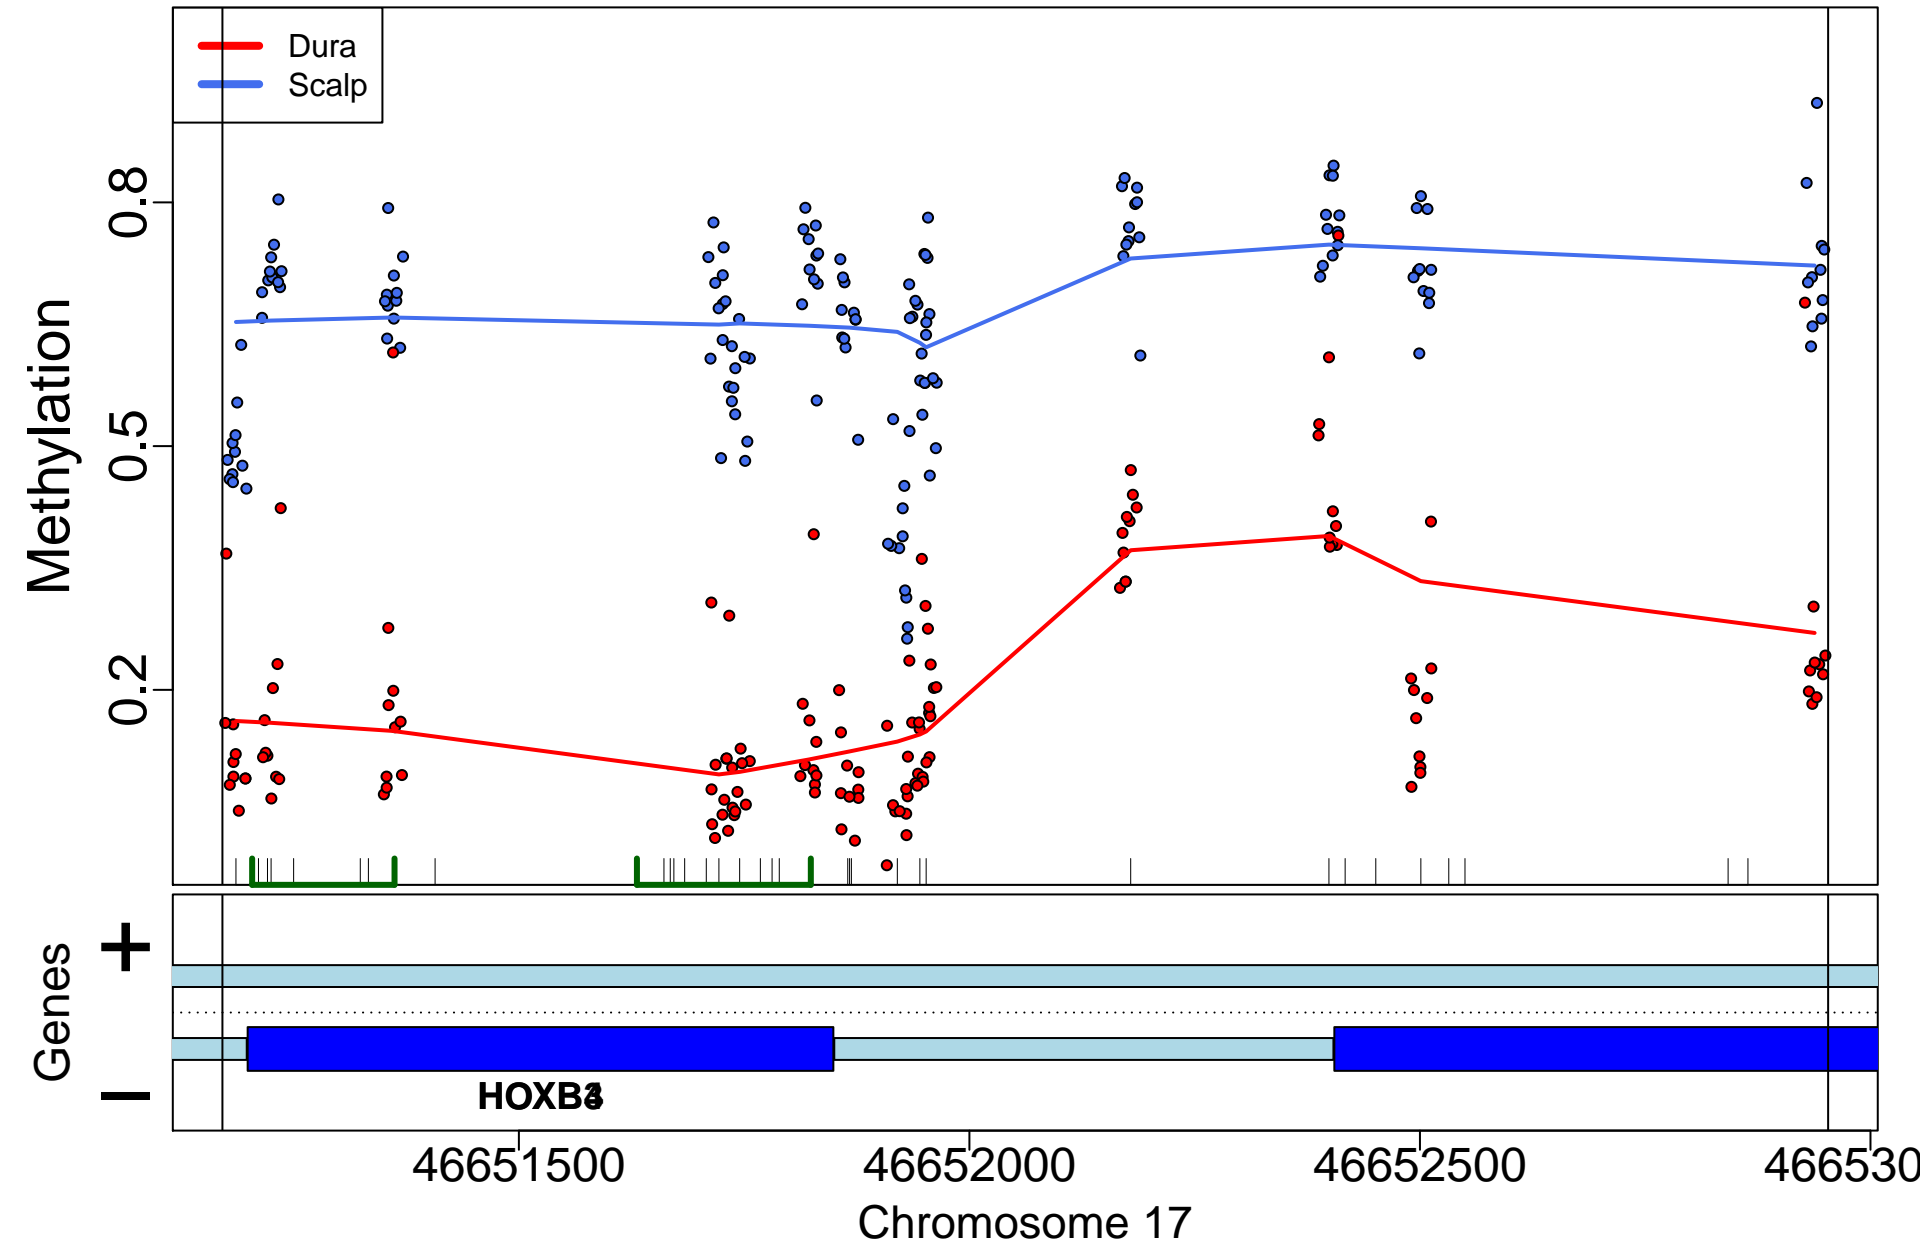

INS-IGF2; 0bp from tss:NA

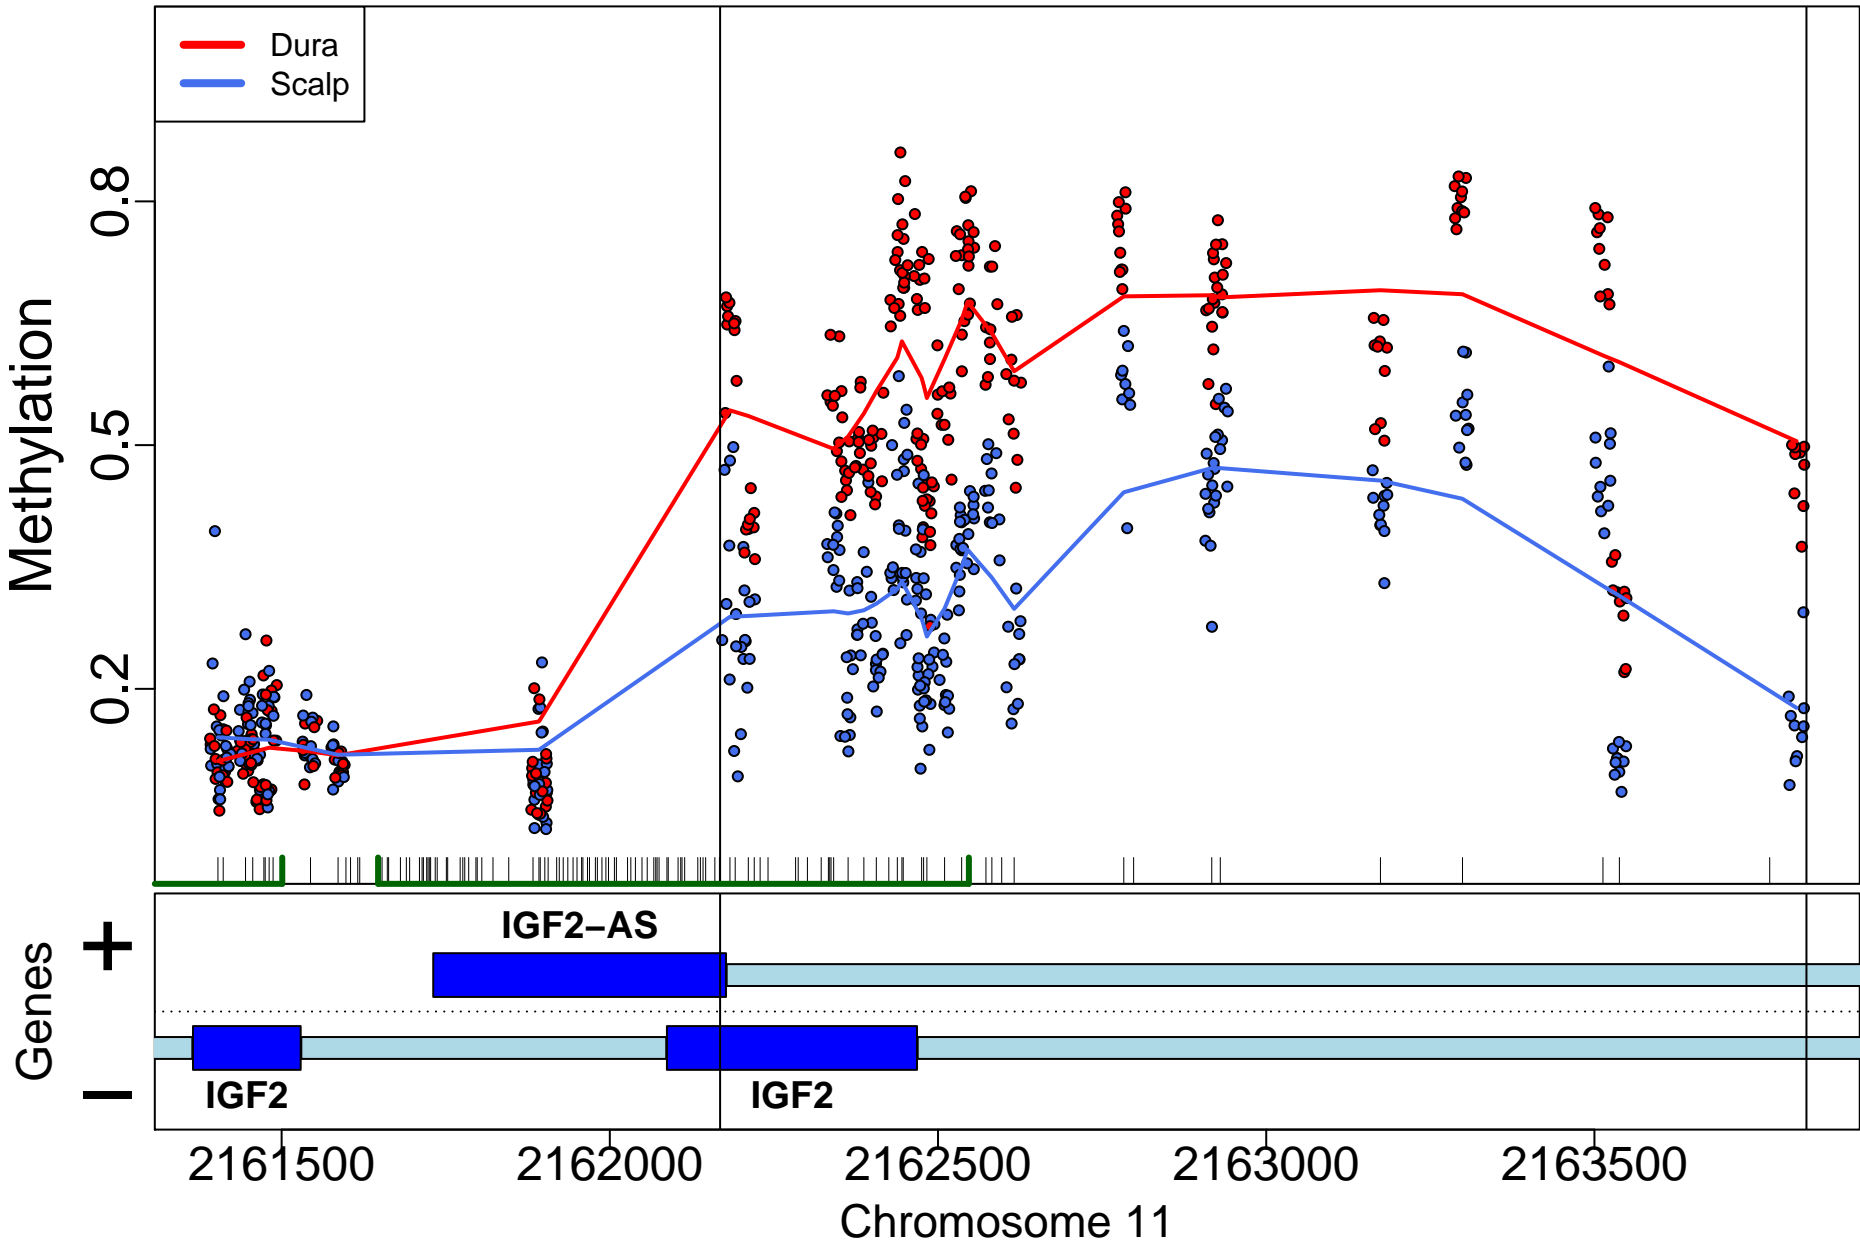

WFIKKN2; 0bp from tss:overlaps 5'

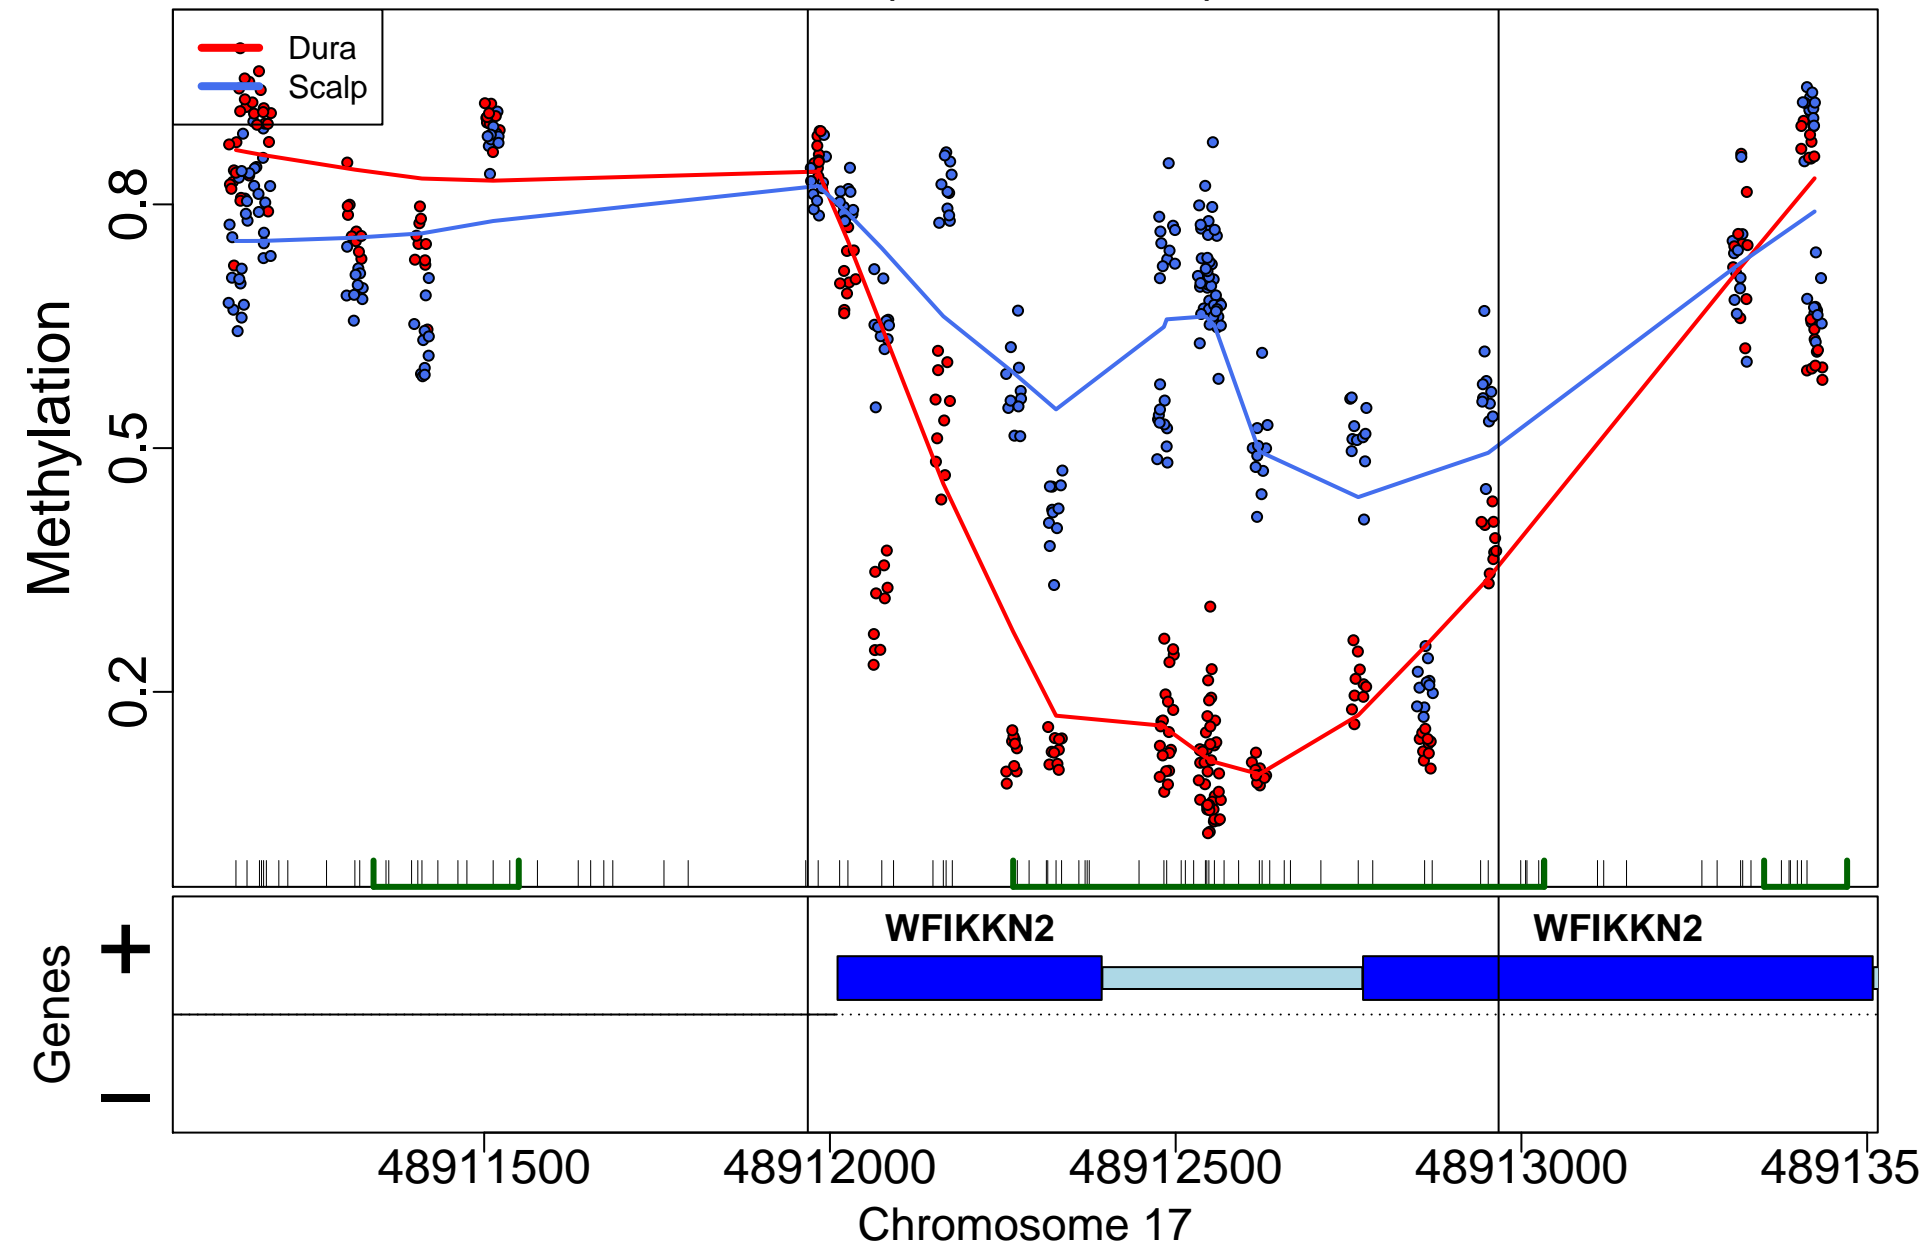

TNXB; 21413bp from tss:inside intron

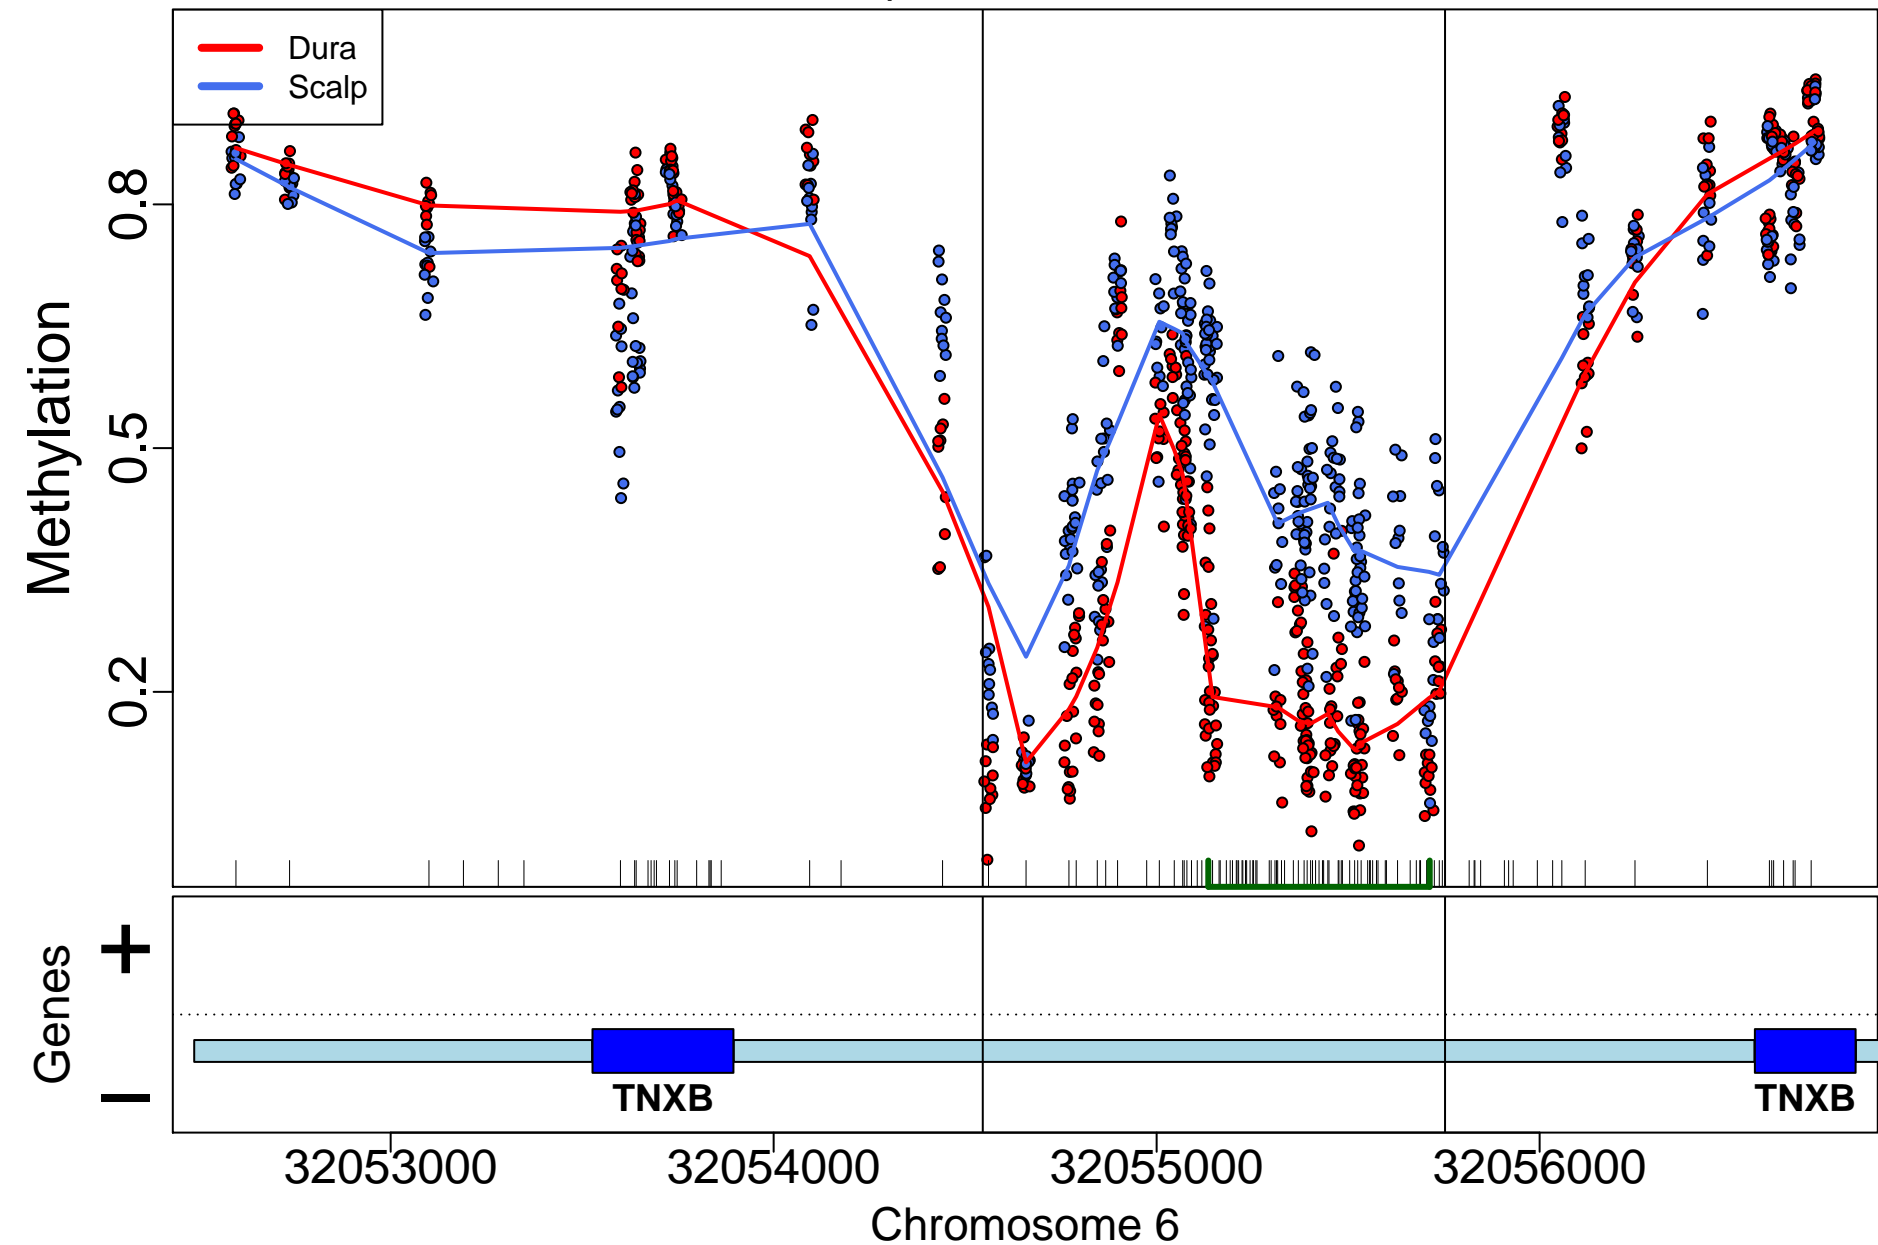



ESR1; 0bp from tss:overlaps 5'

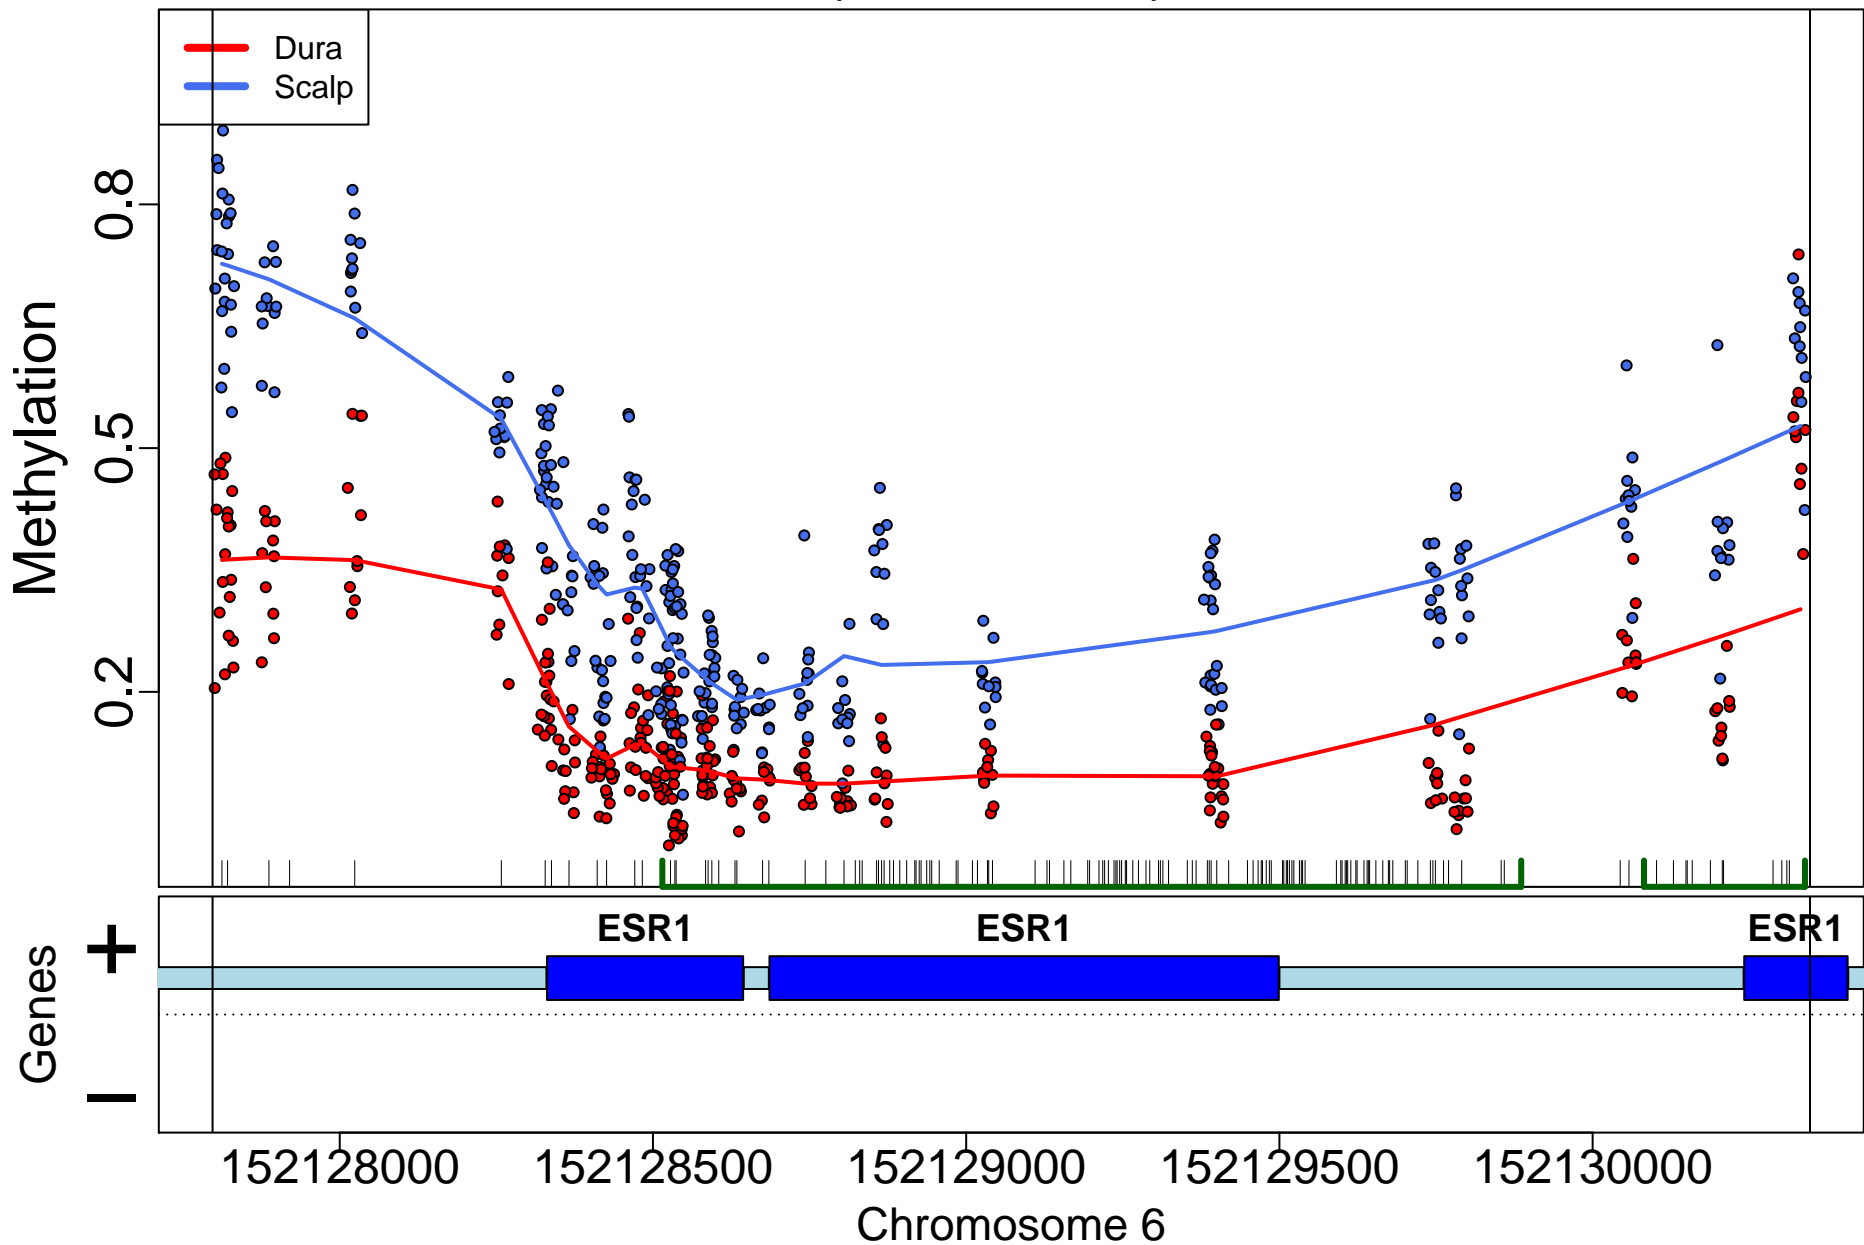

TNXB; 49772bp from tss:overlaps exon upstream

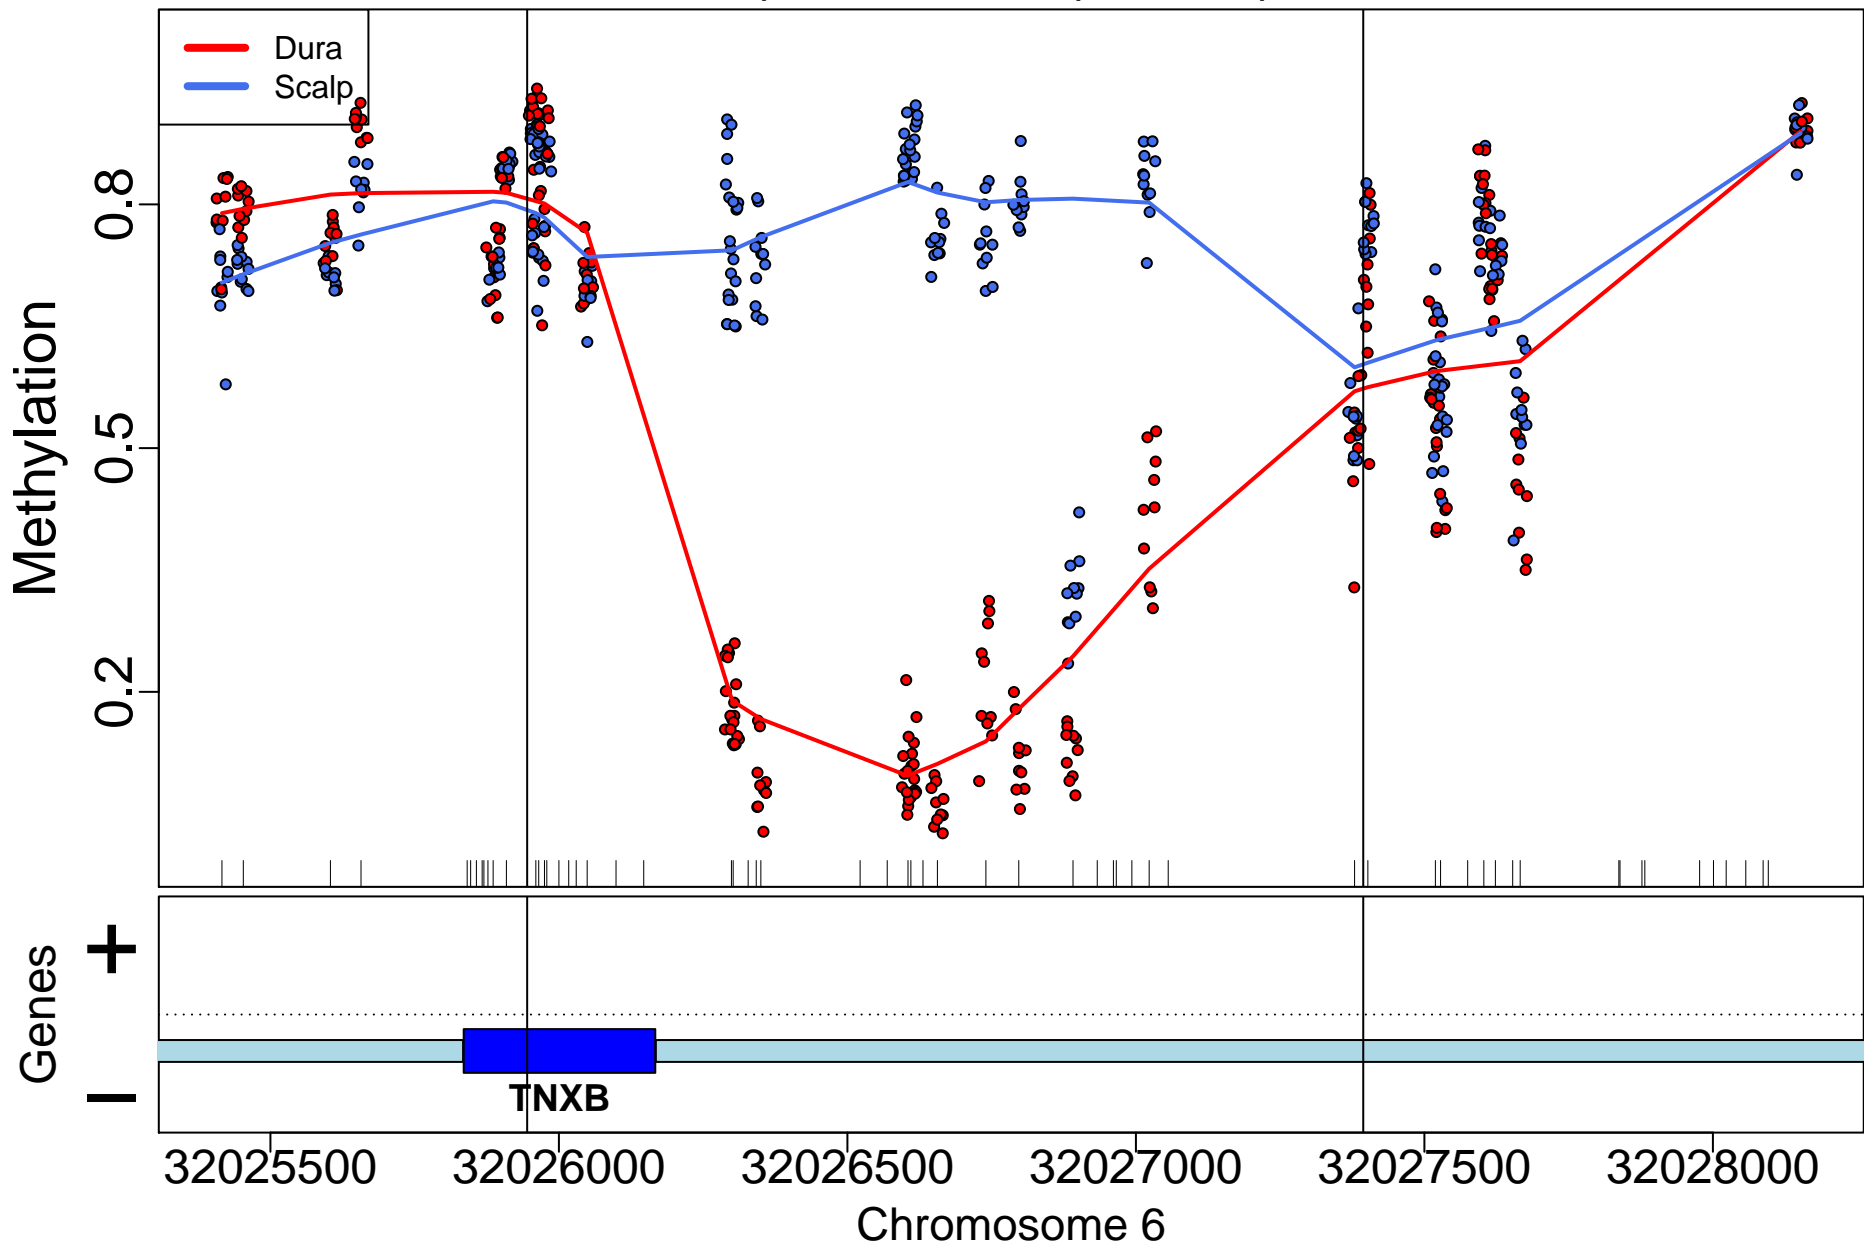

# MIR10B; 0bp from tss:NA

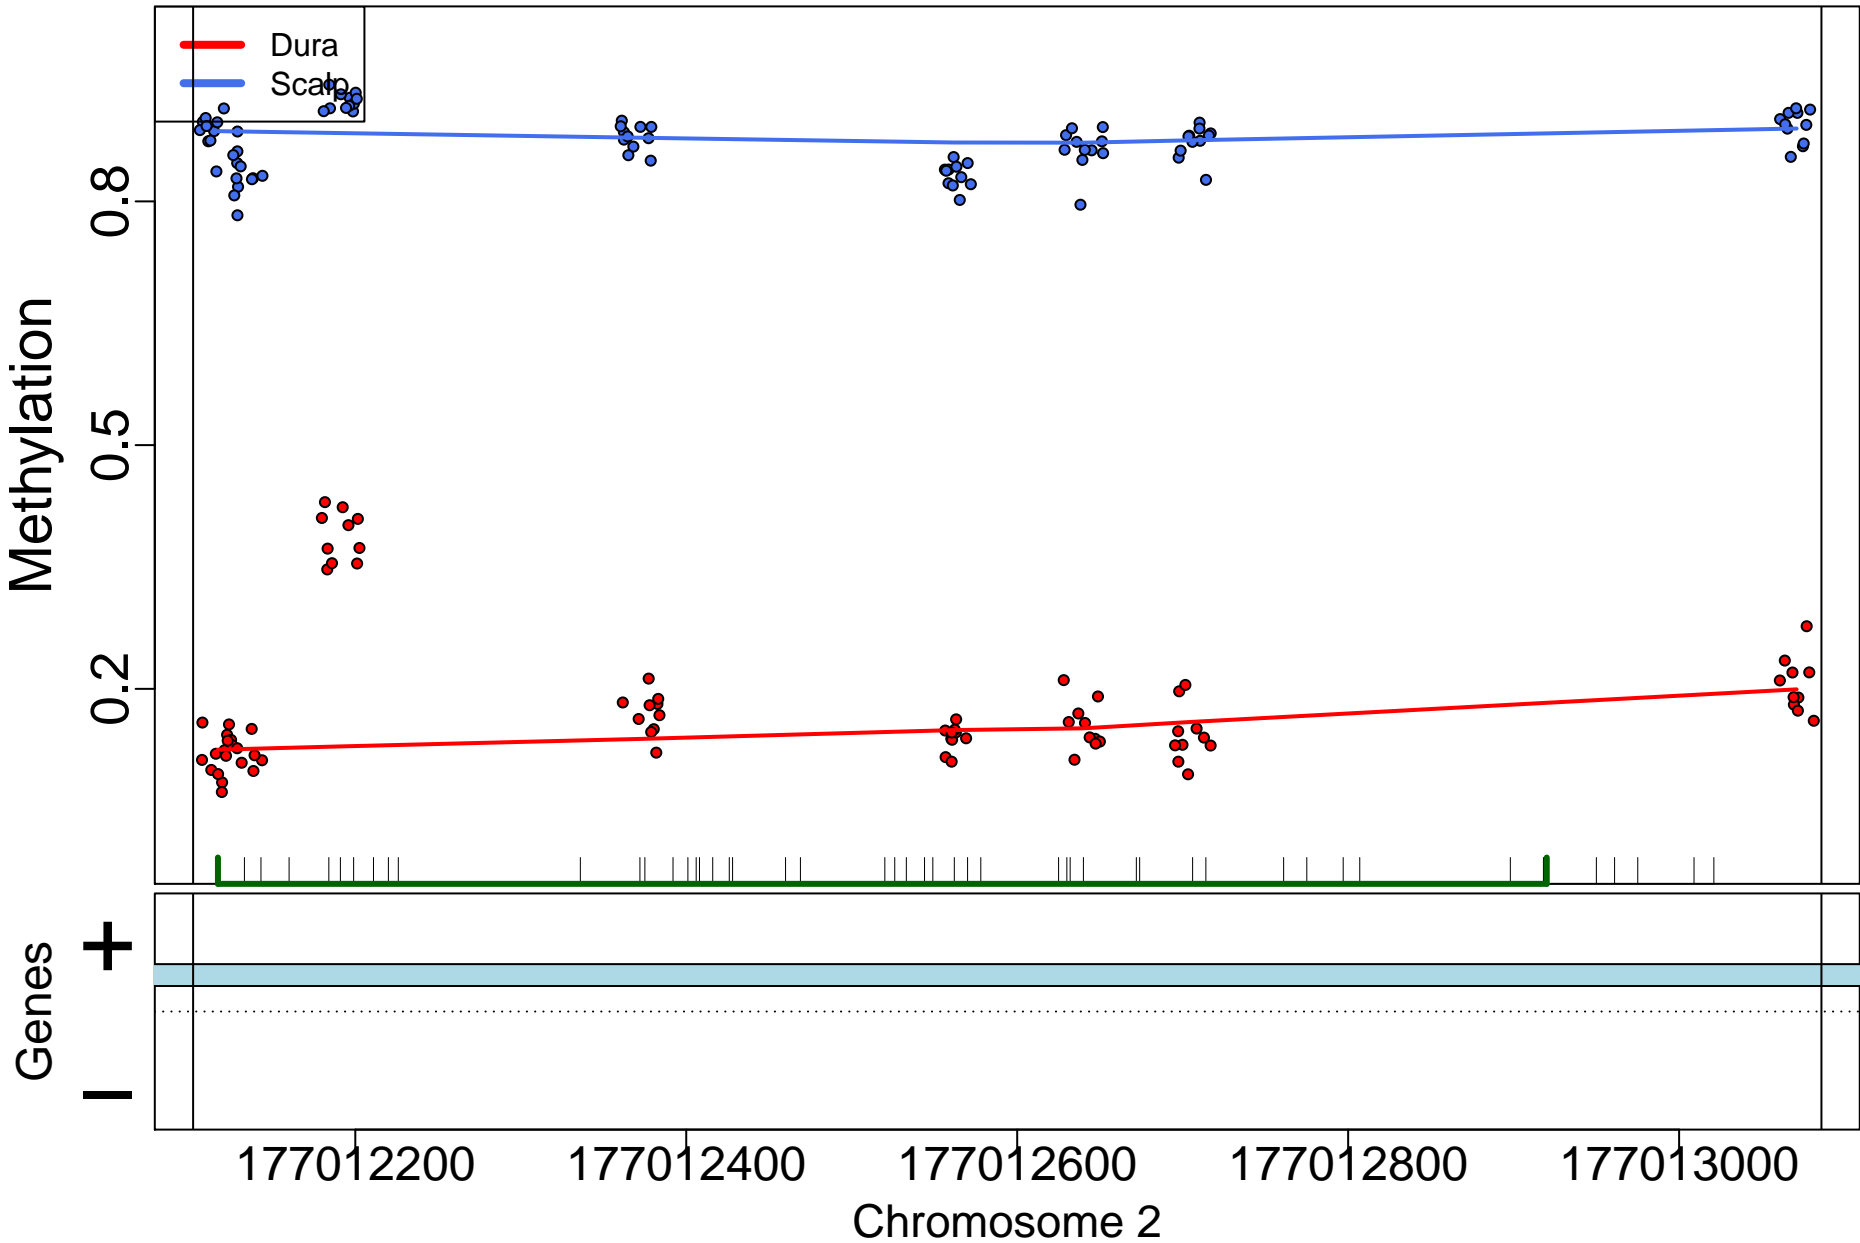

NBEA; 0bp from tss:overlaps 5'

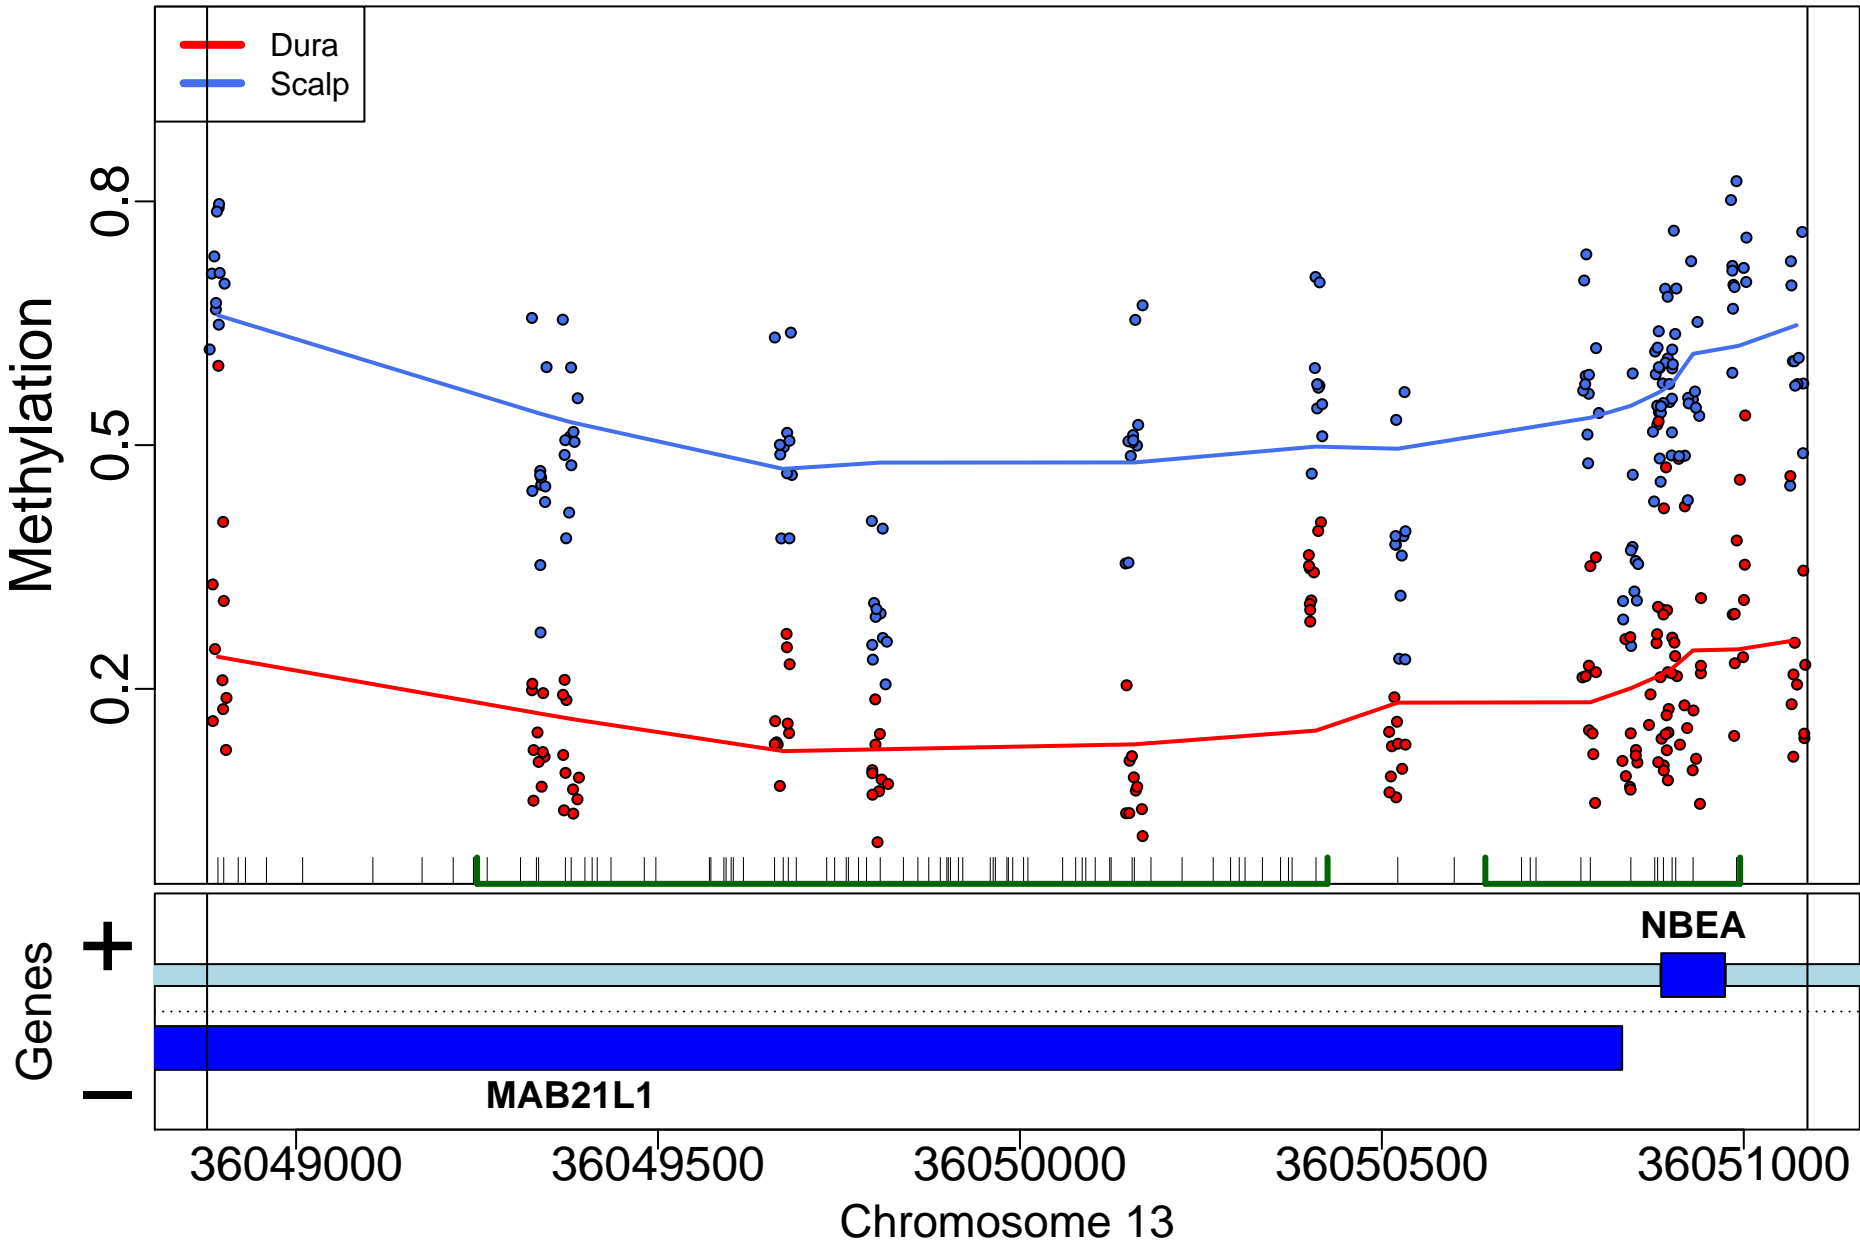

SIX1; 5361bp from tss:upstream

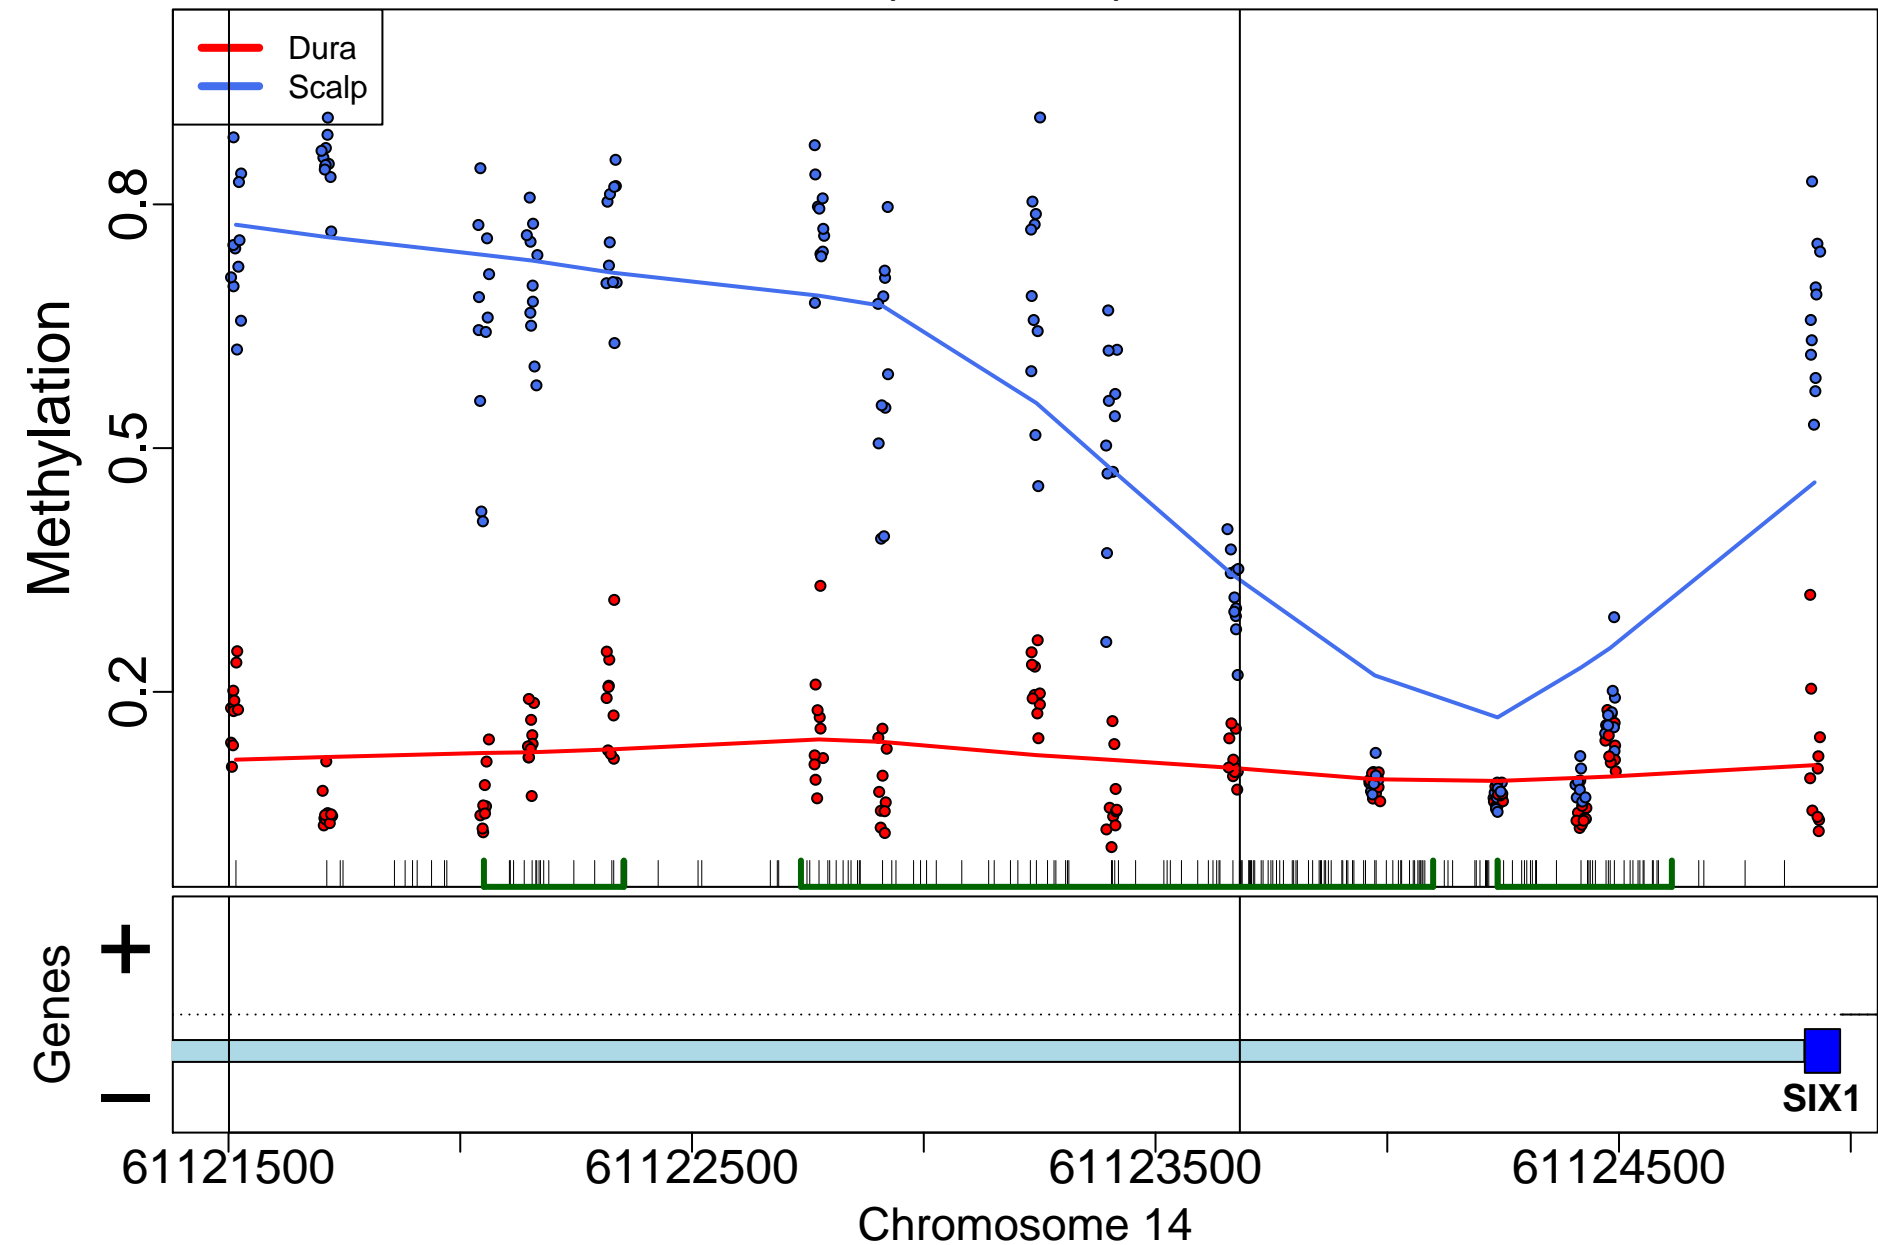

# HOXA11-AS; 0bp from tss:NA

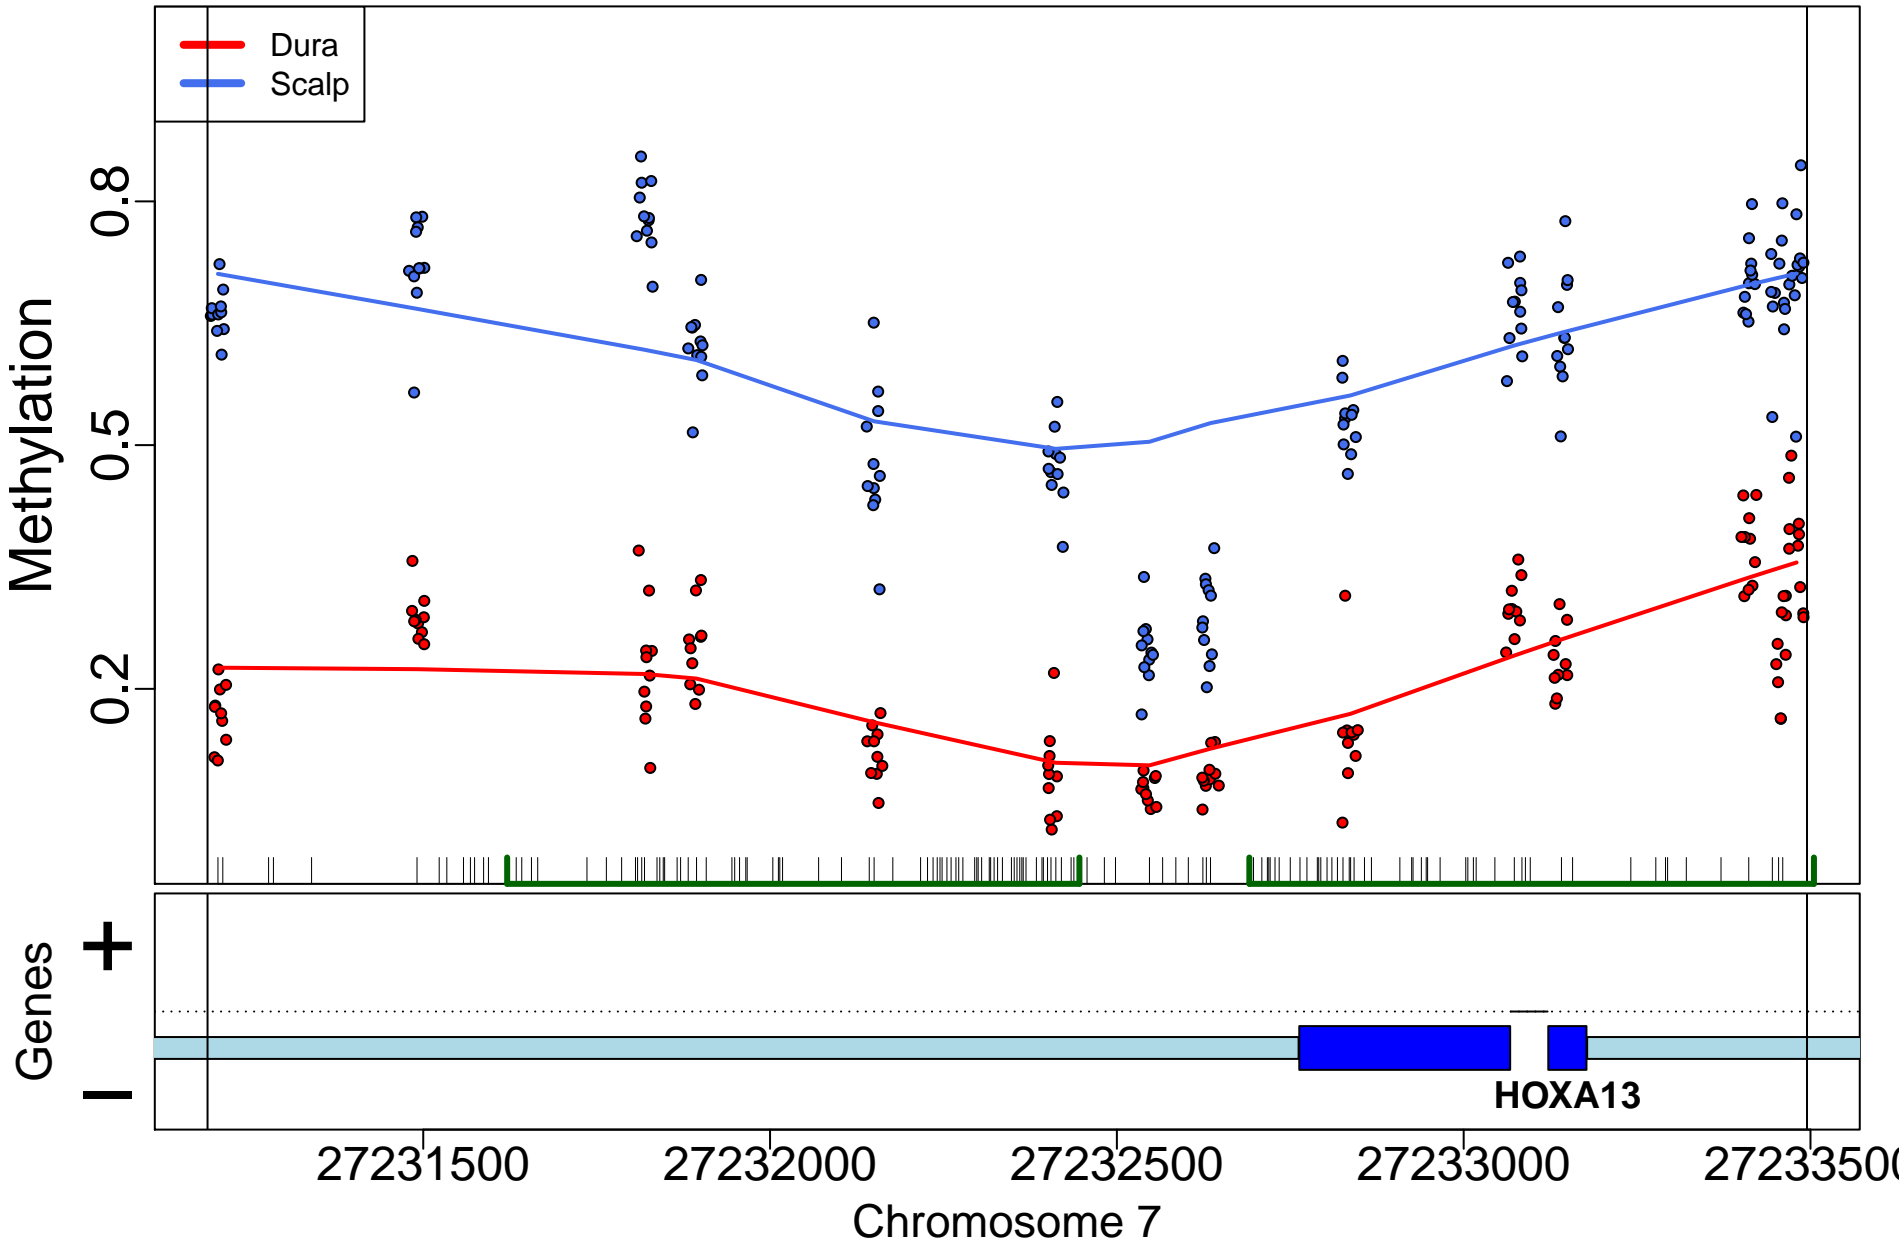

MIR596; 0bp from tss:NA

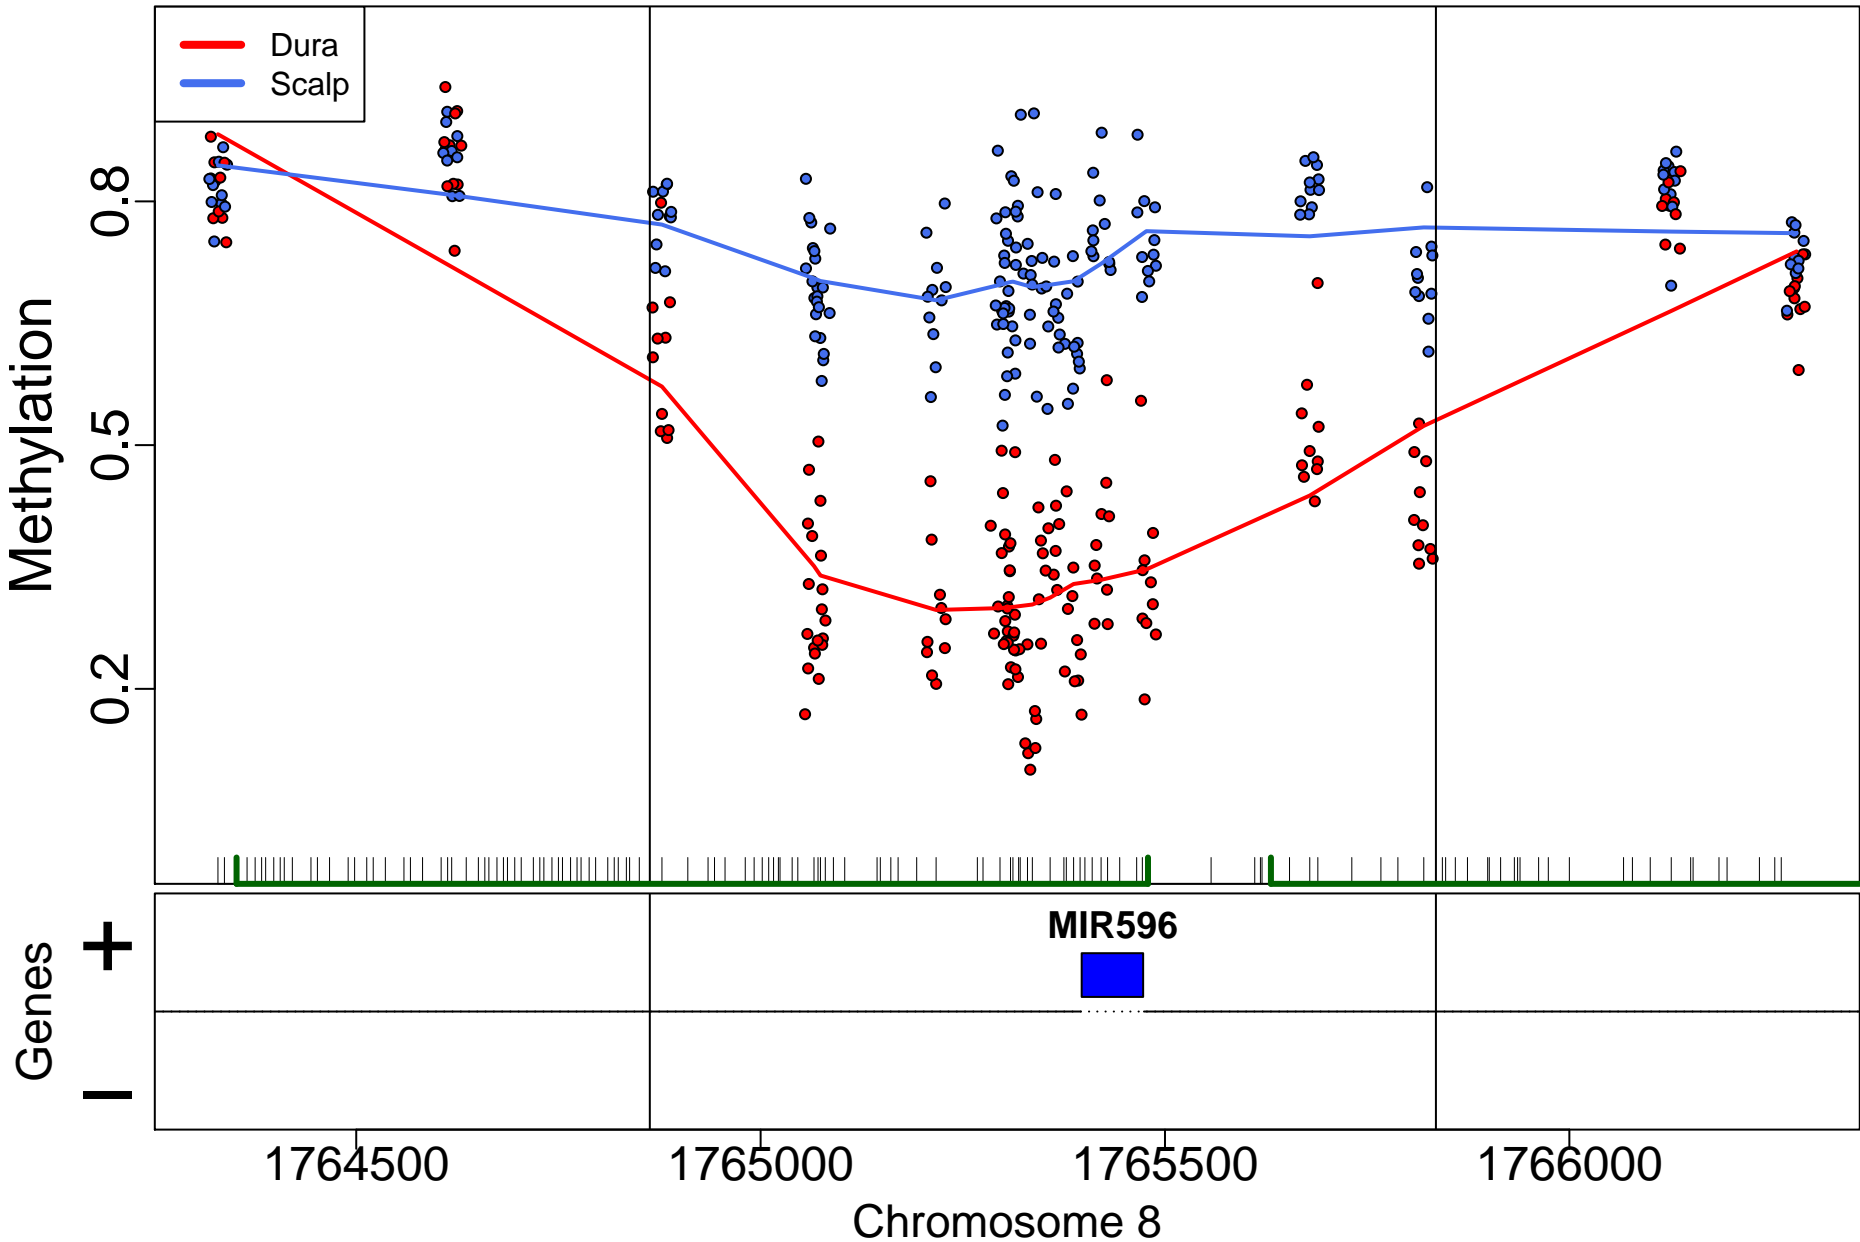

## MSX1; 2578bp from tss:upstream

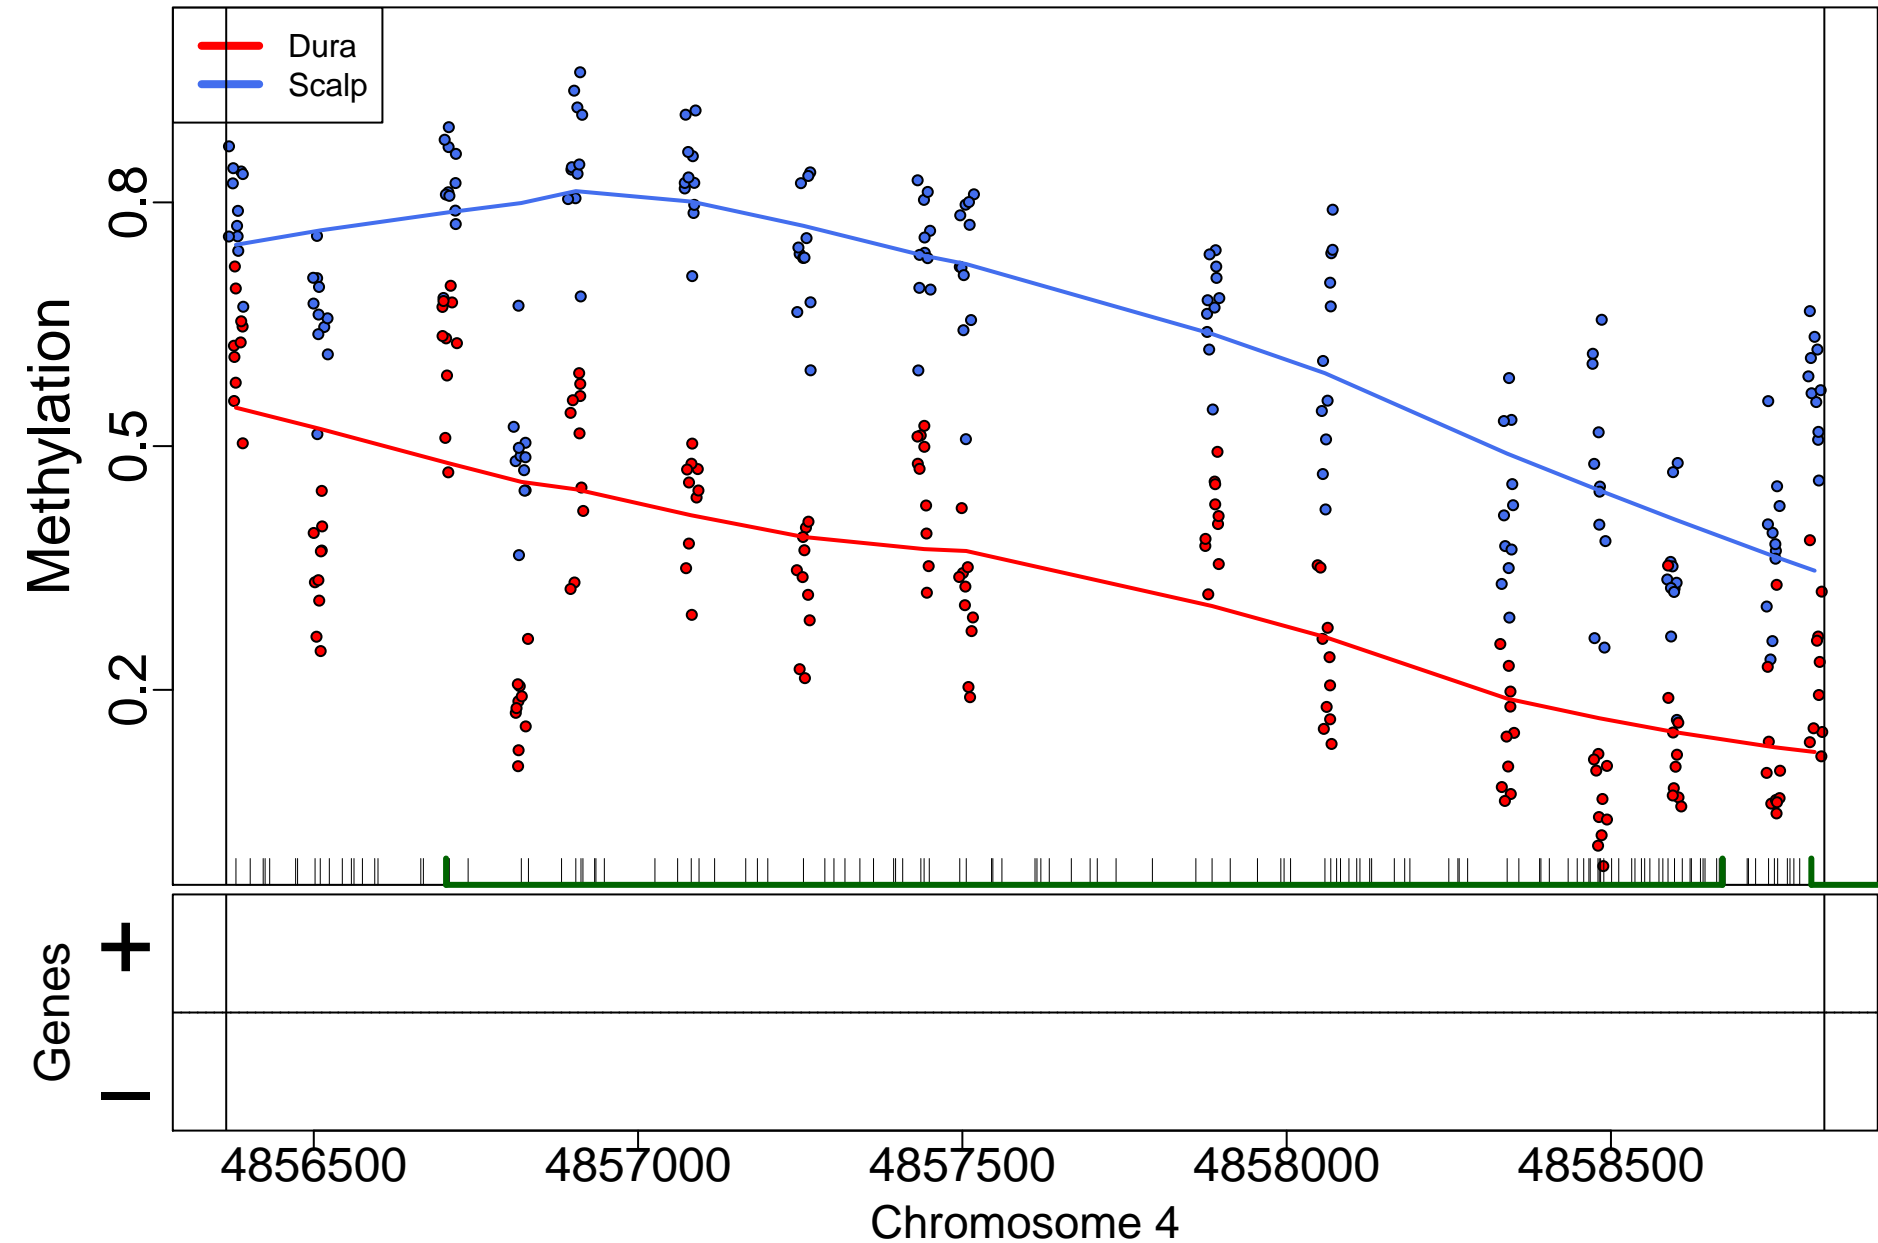



TWIST1; 706bp from tss:promoter

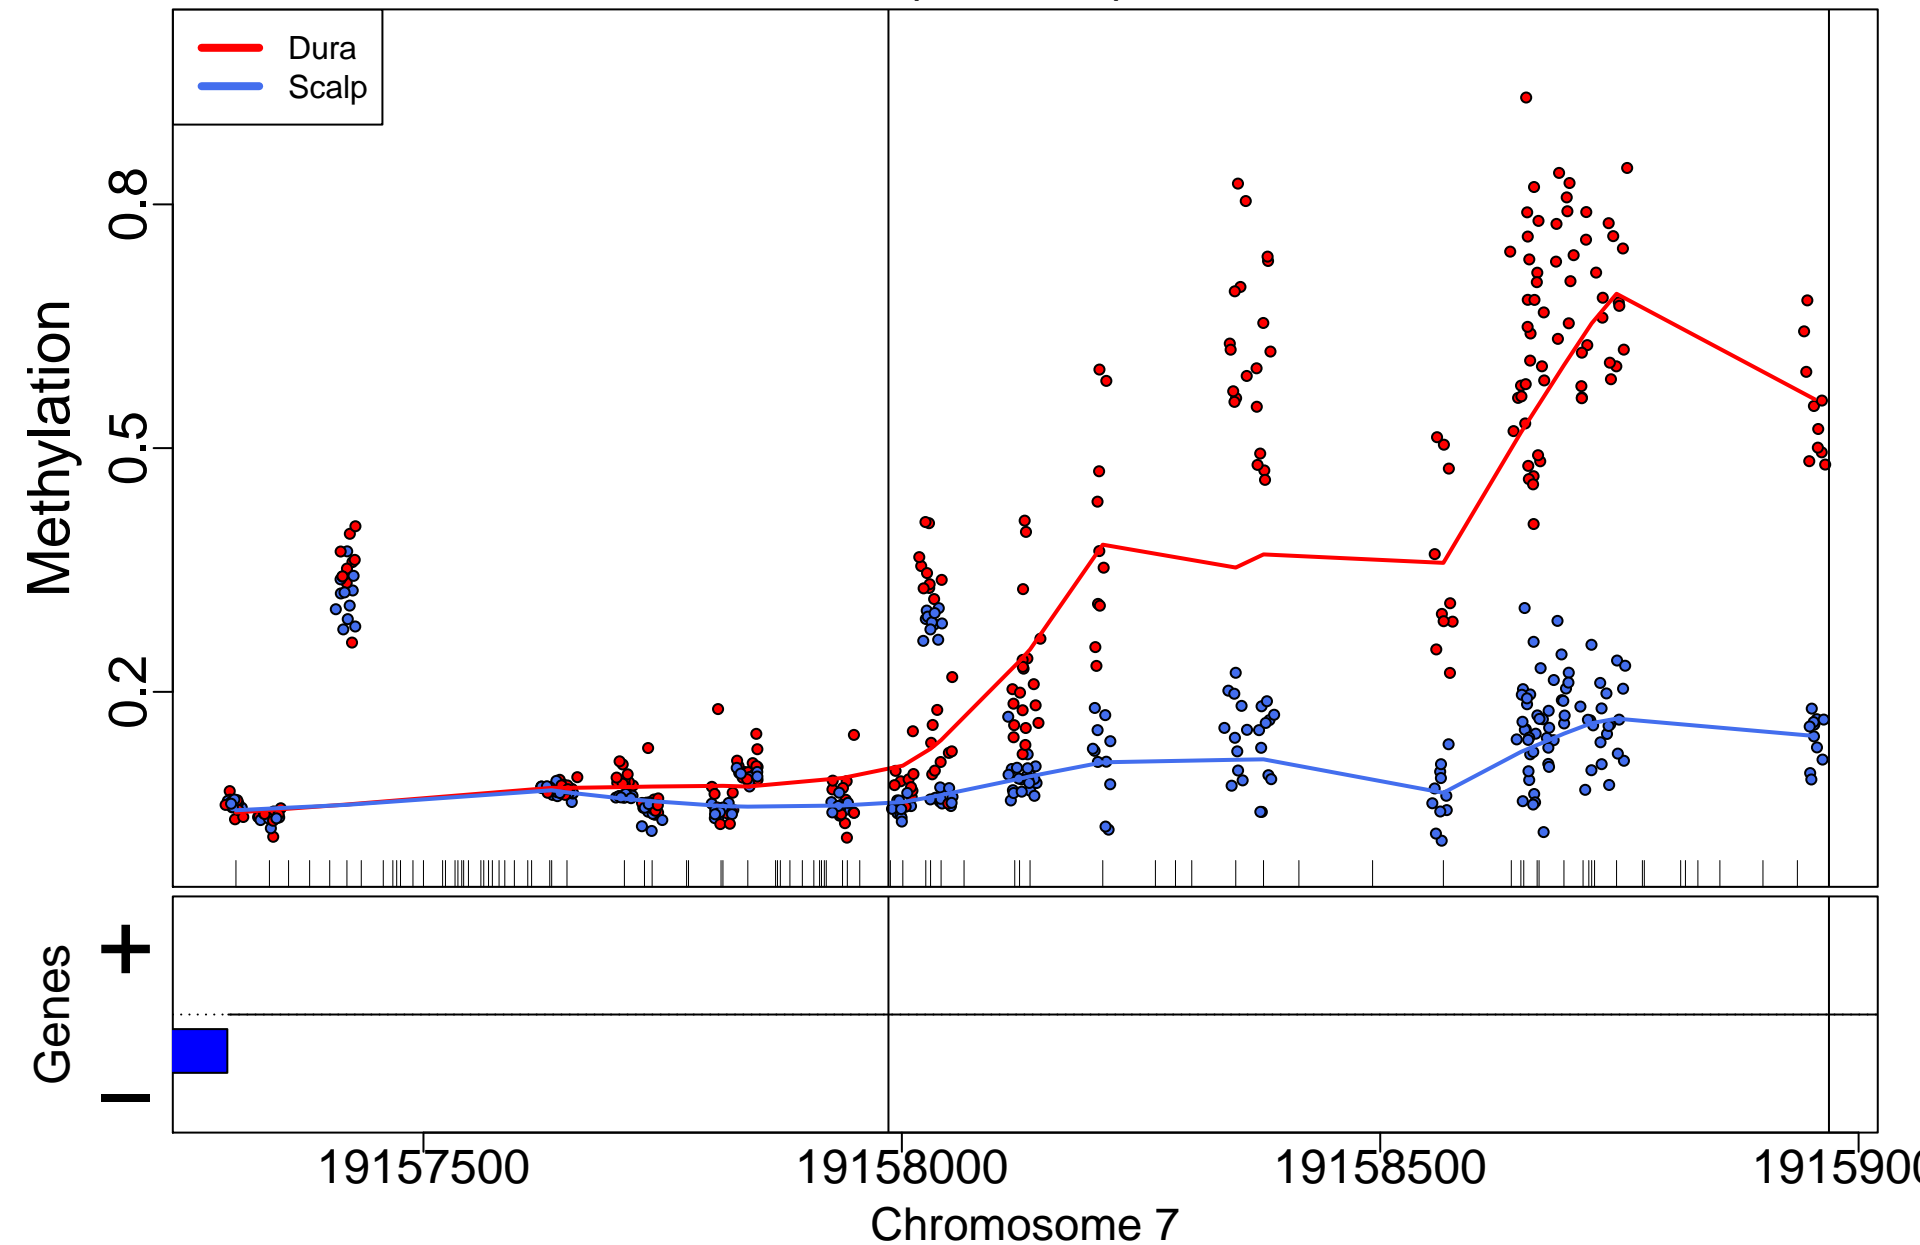

LINC00311; 0bp from tss:NA

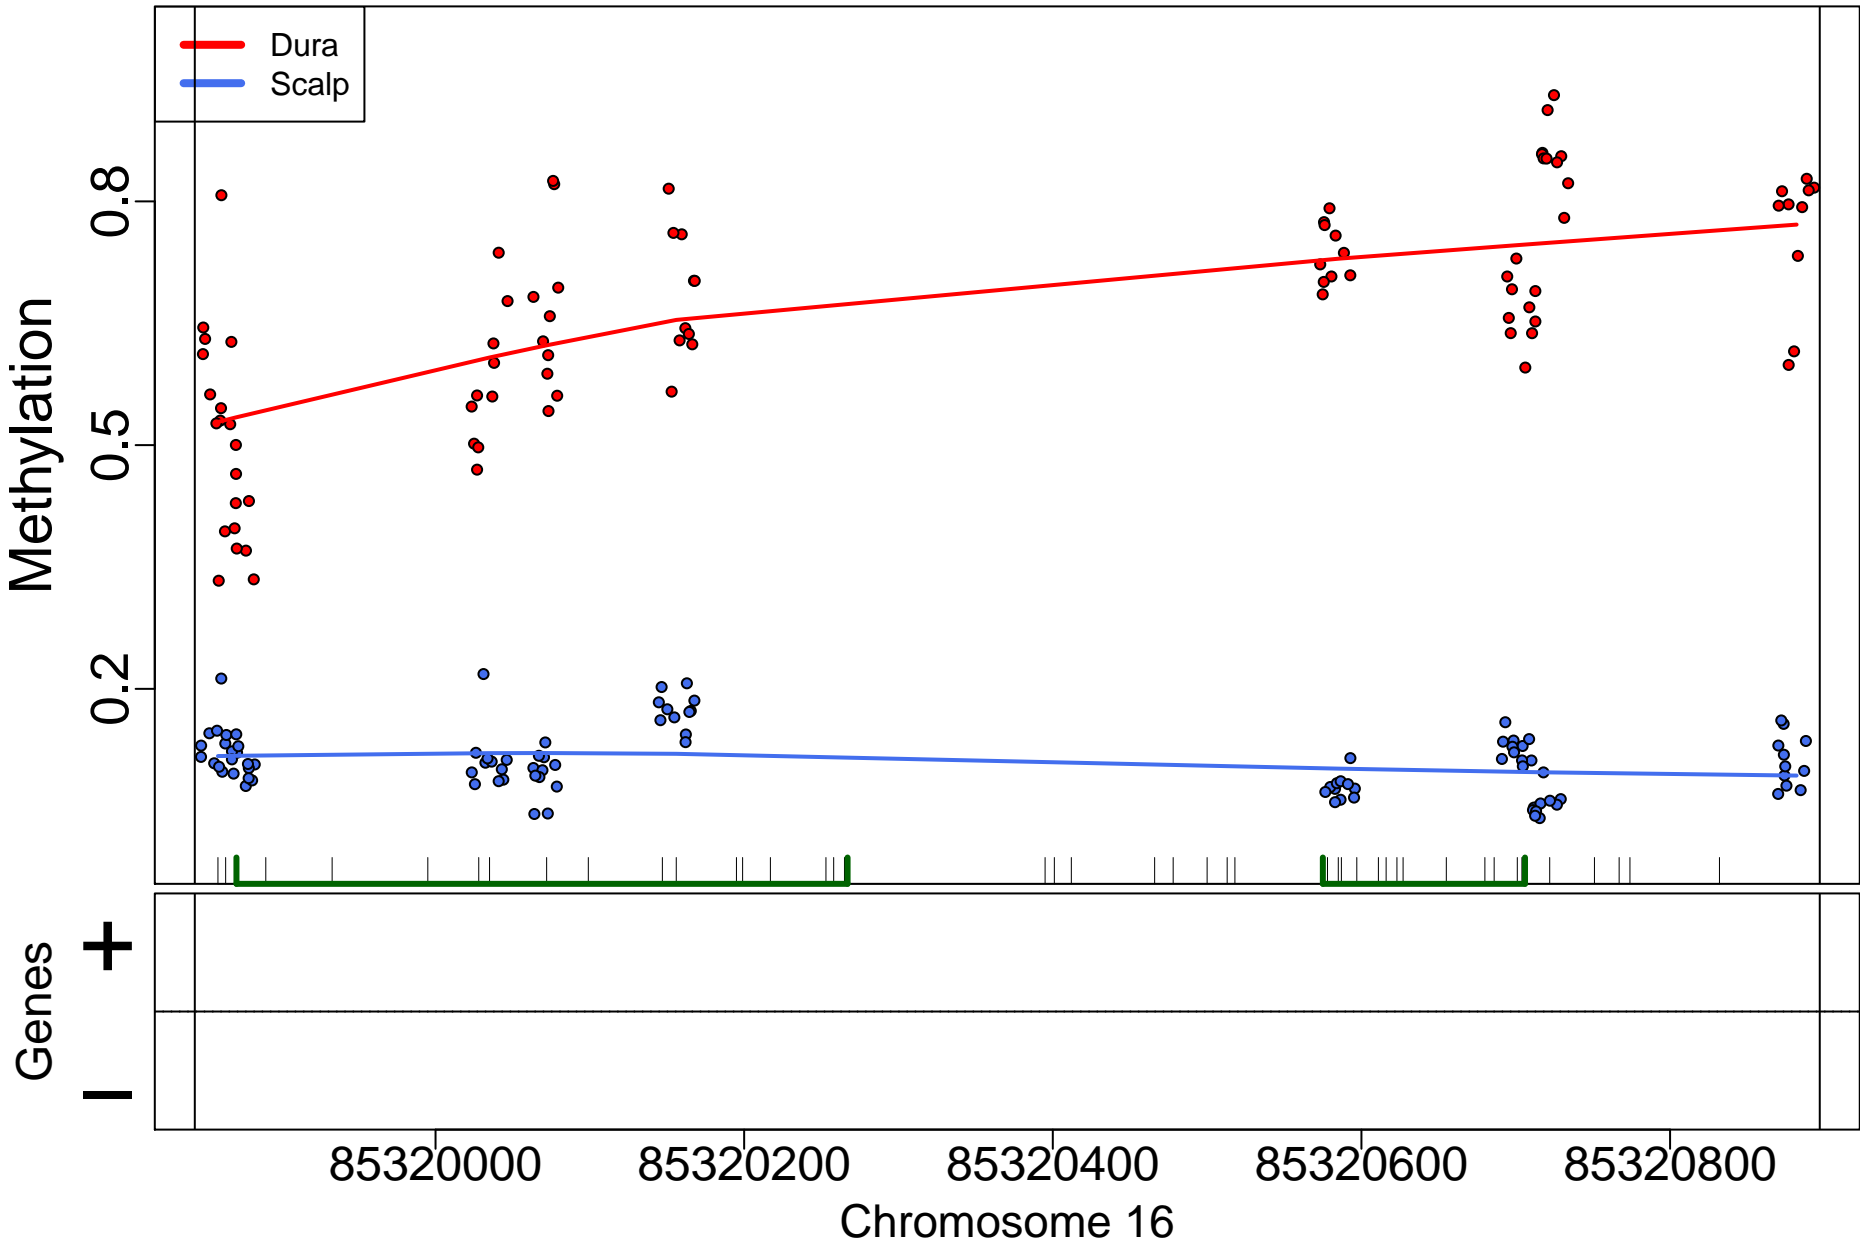

ZIC2; 6888bp from tss:downstream

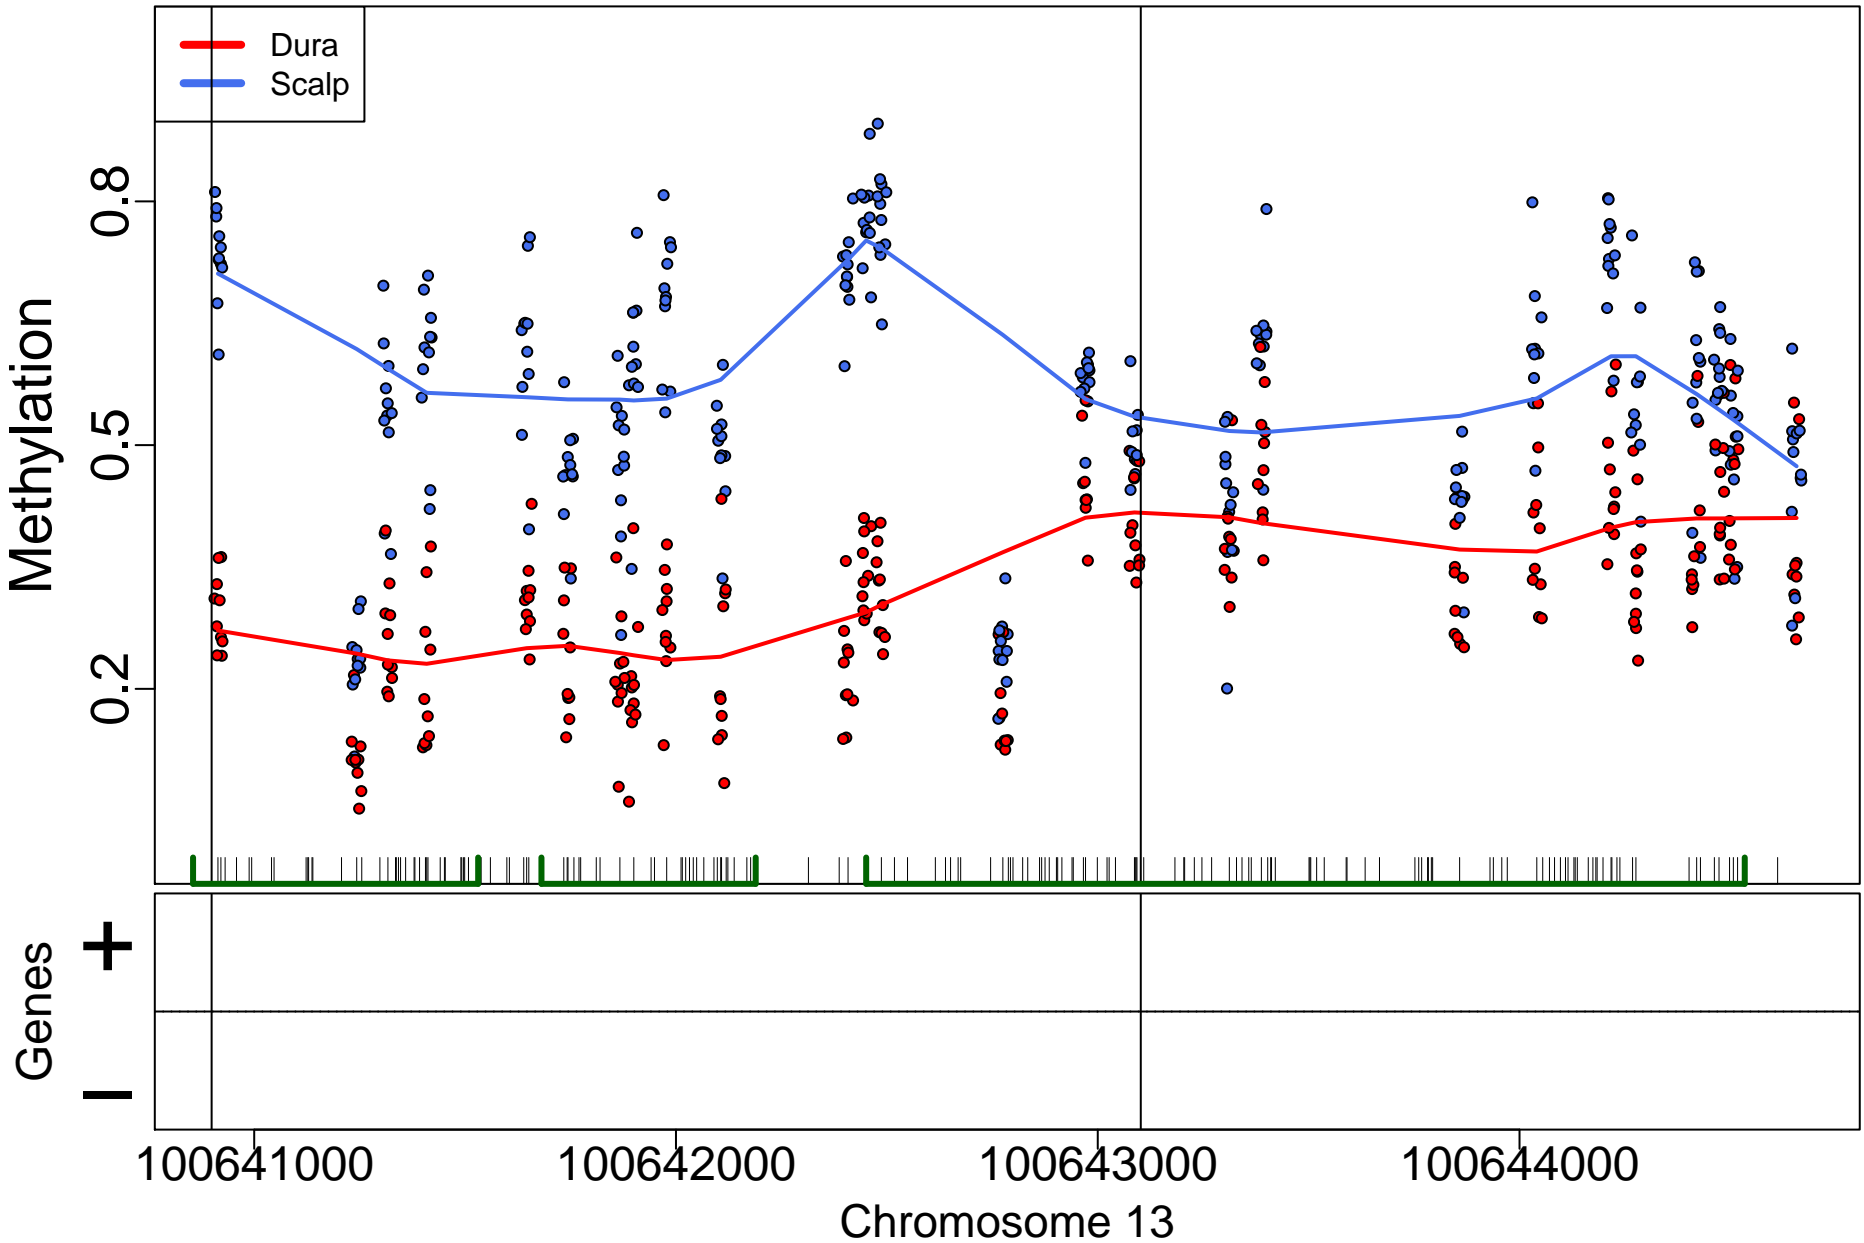

SPON2; 35036bp from tss:inside intron

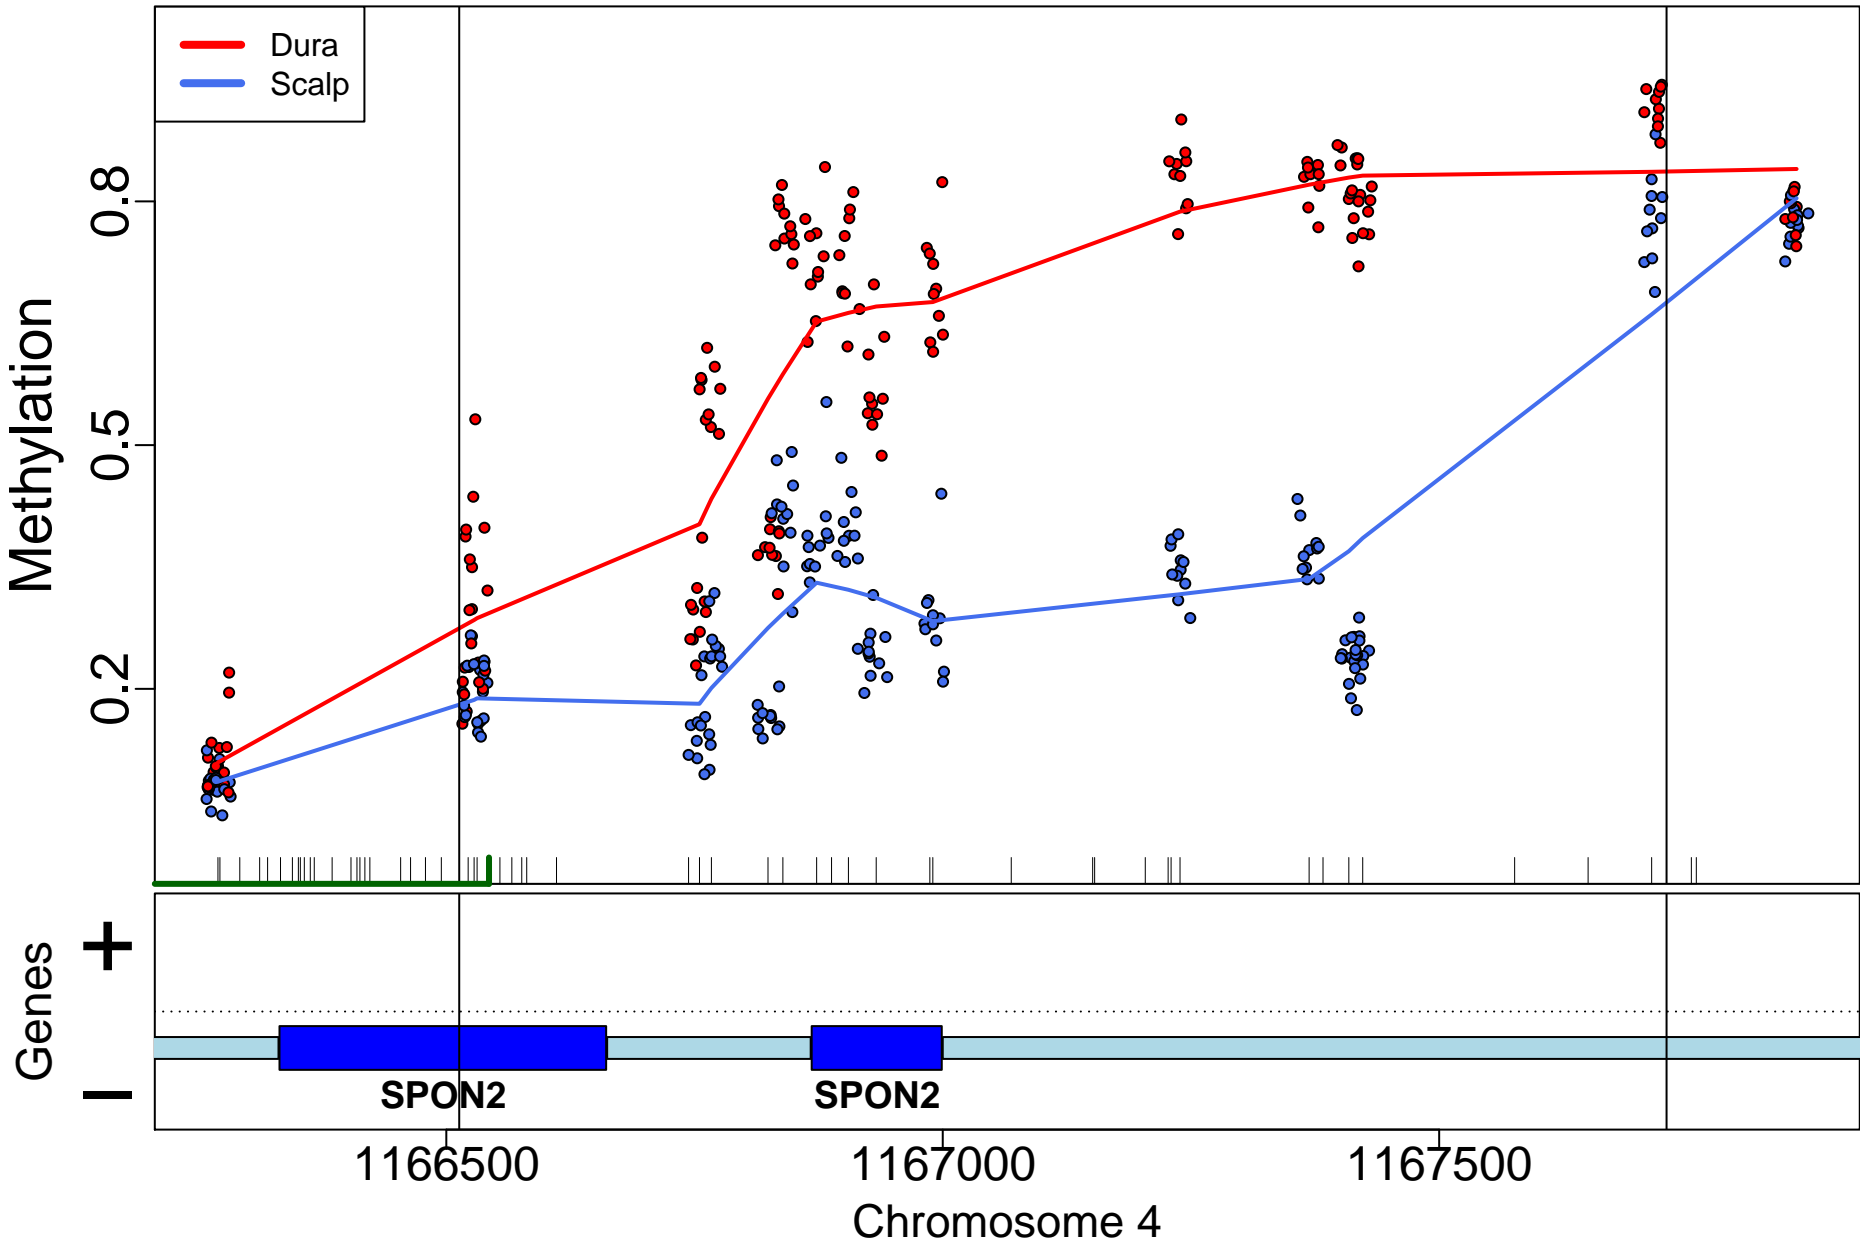

## MSX1; 4655bp from tss:downstream

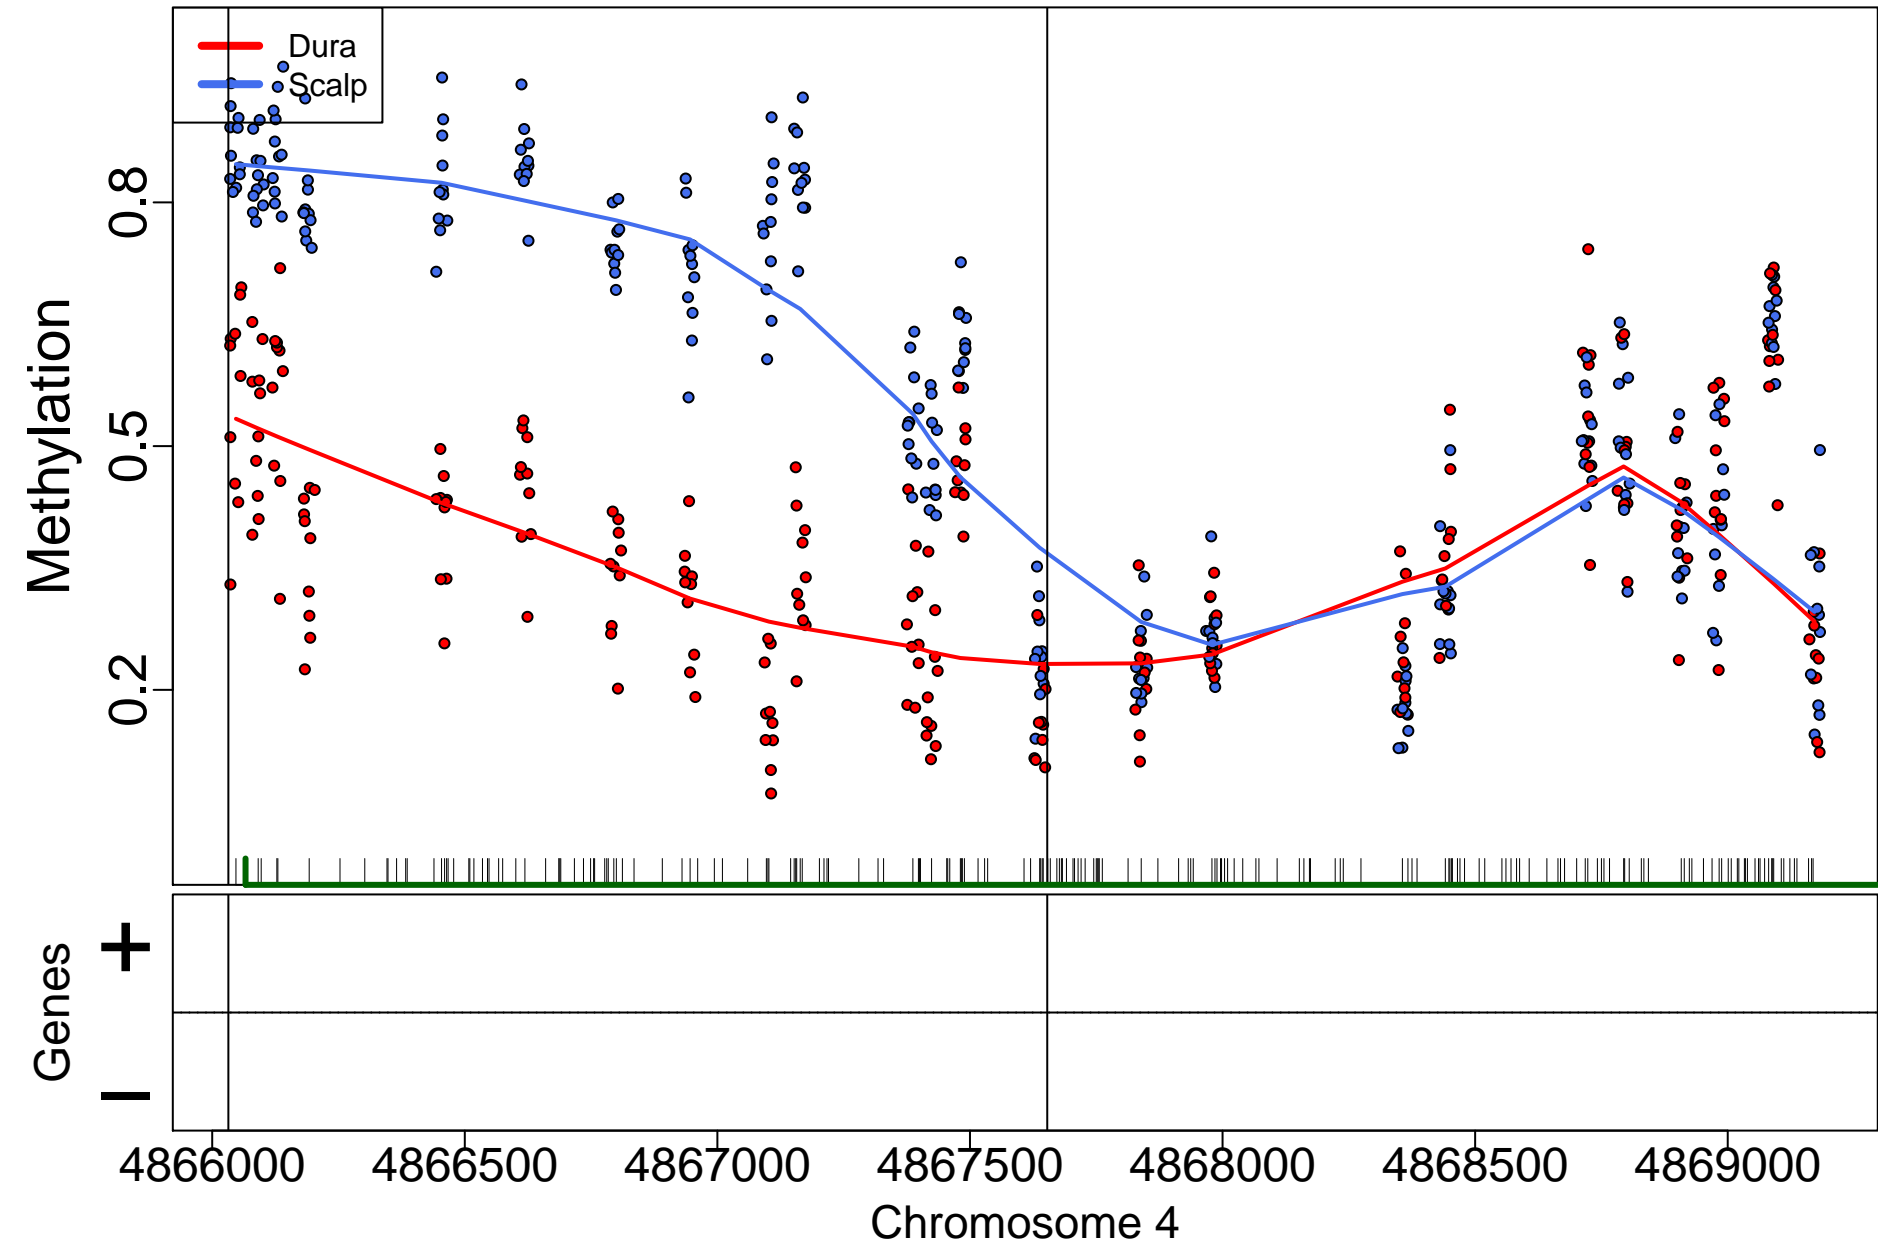

HLX; 1098bp from tss:covers exon(s)

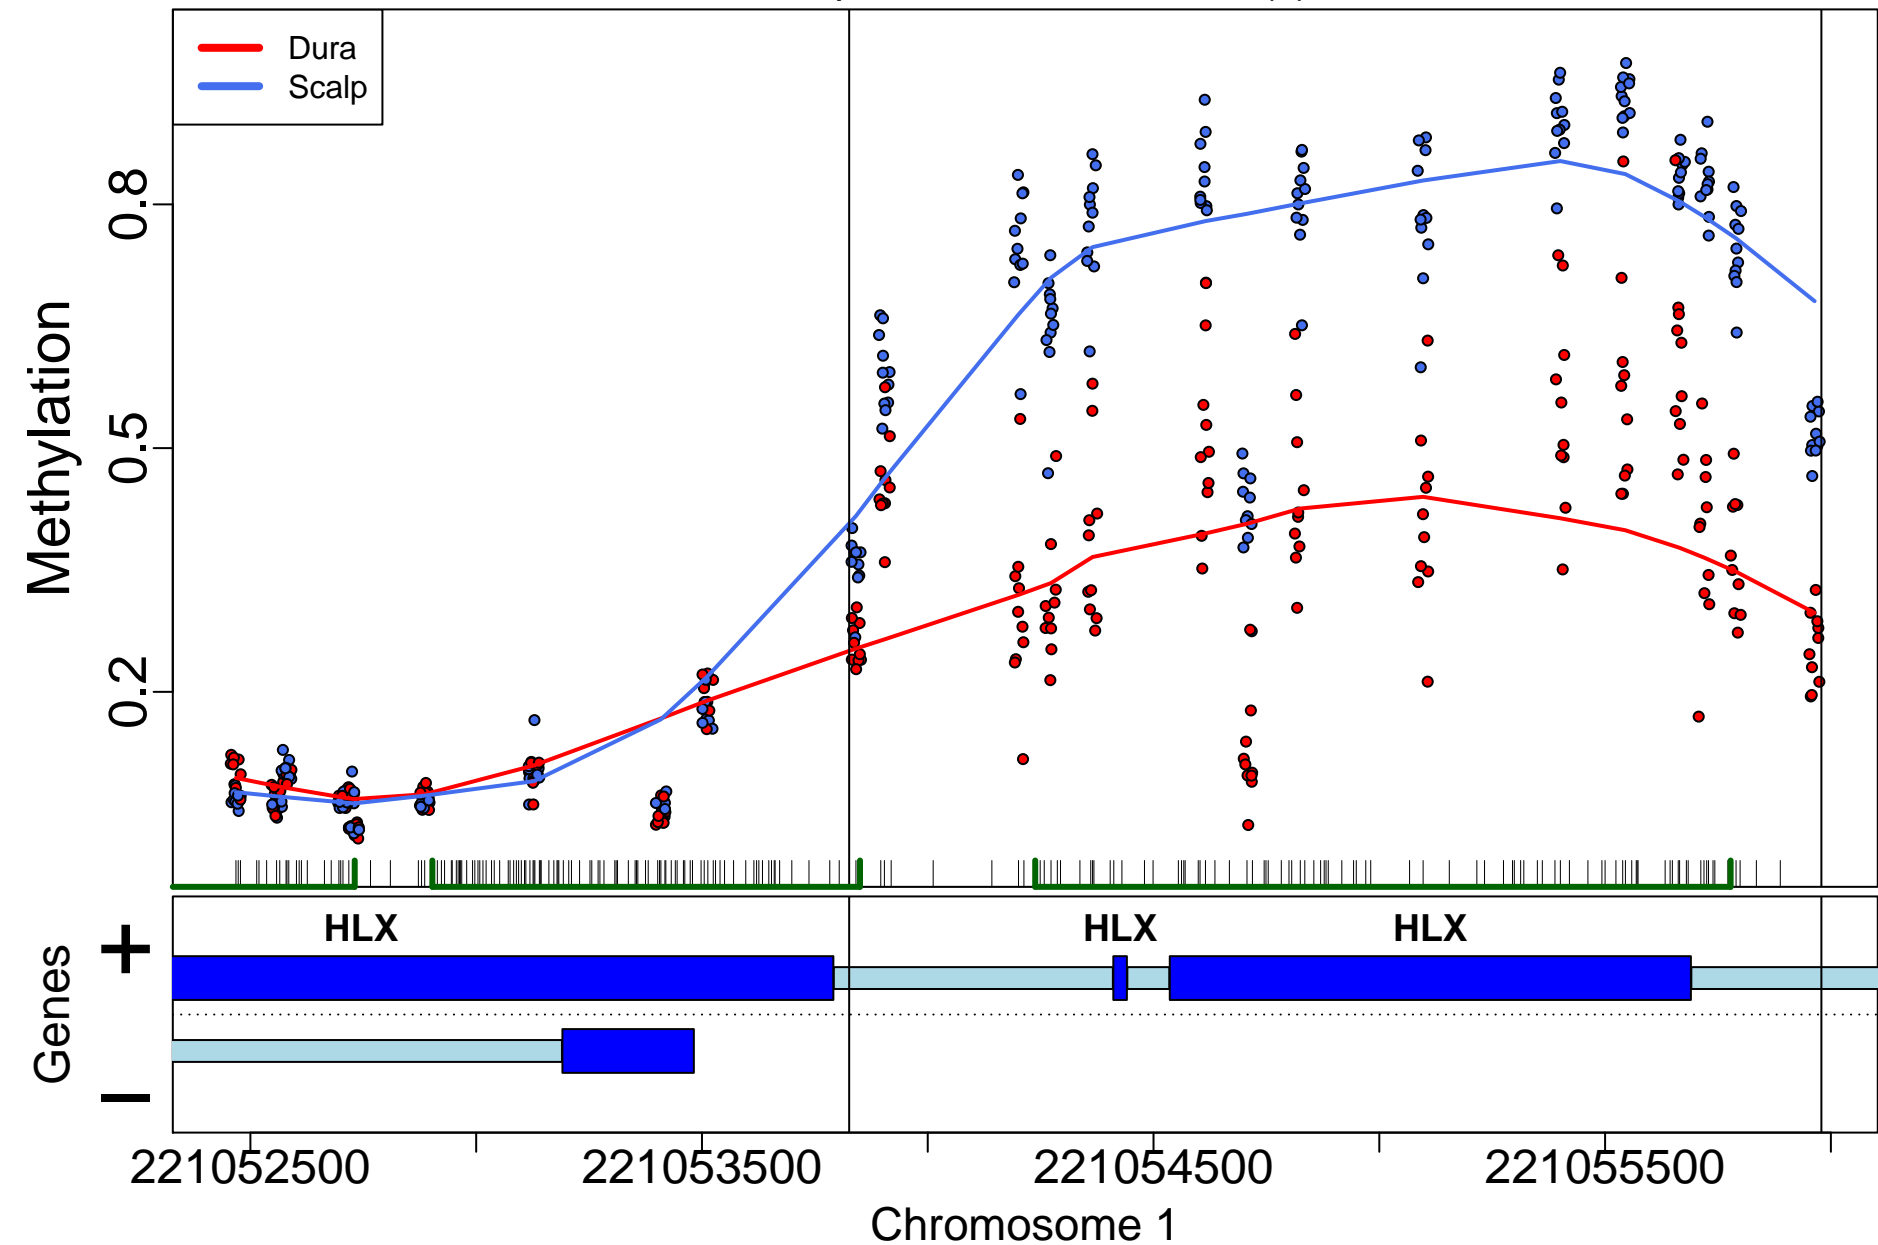

# LSP1; 0bp from tss:overlaps 5'

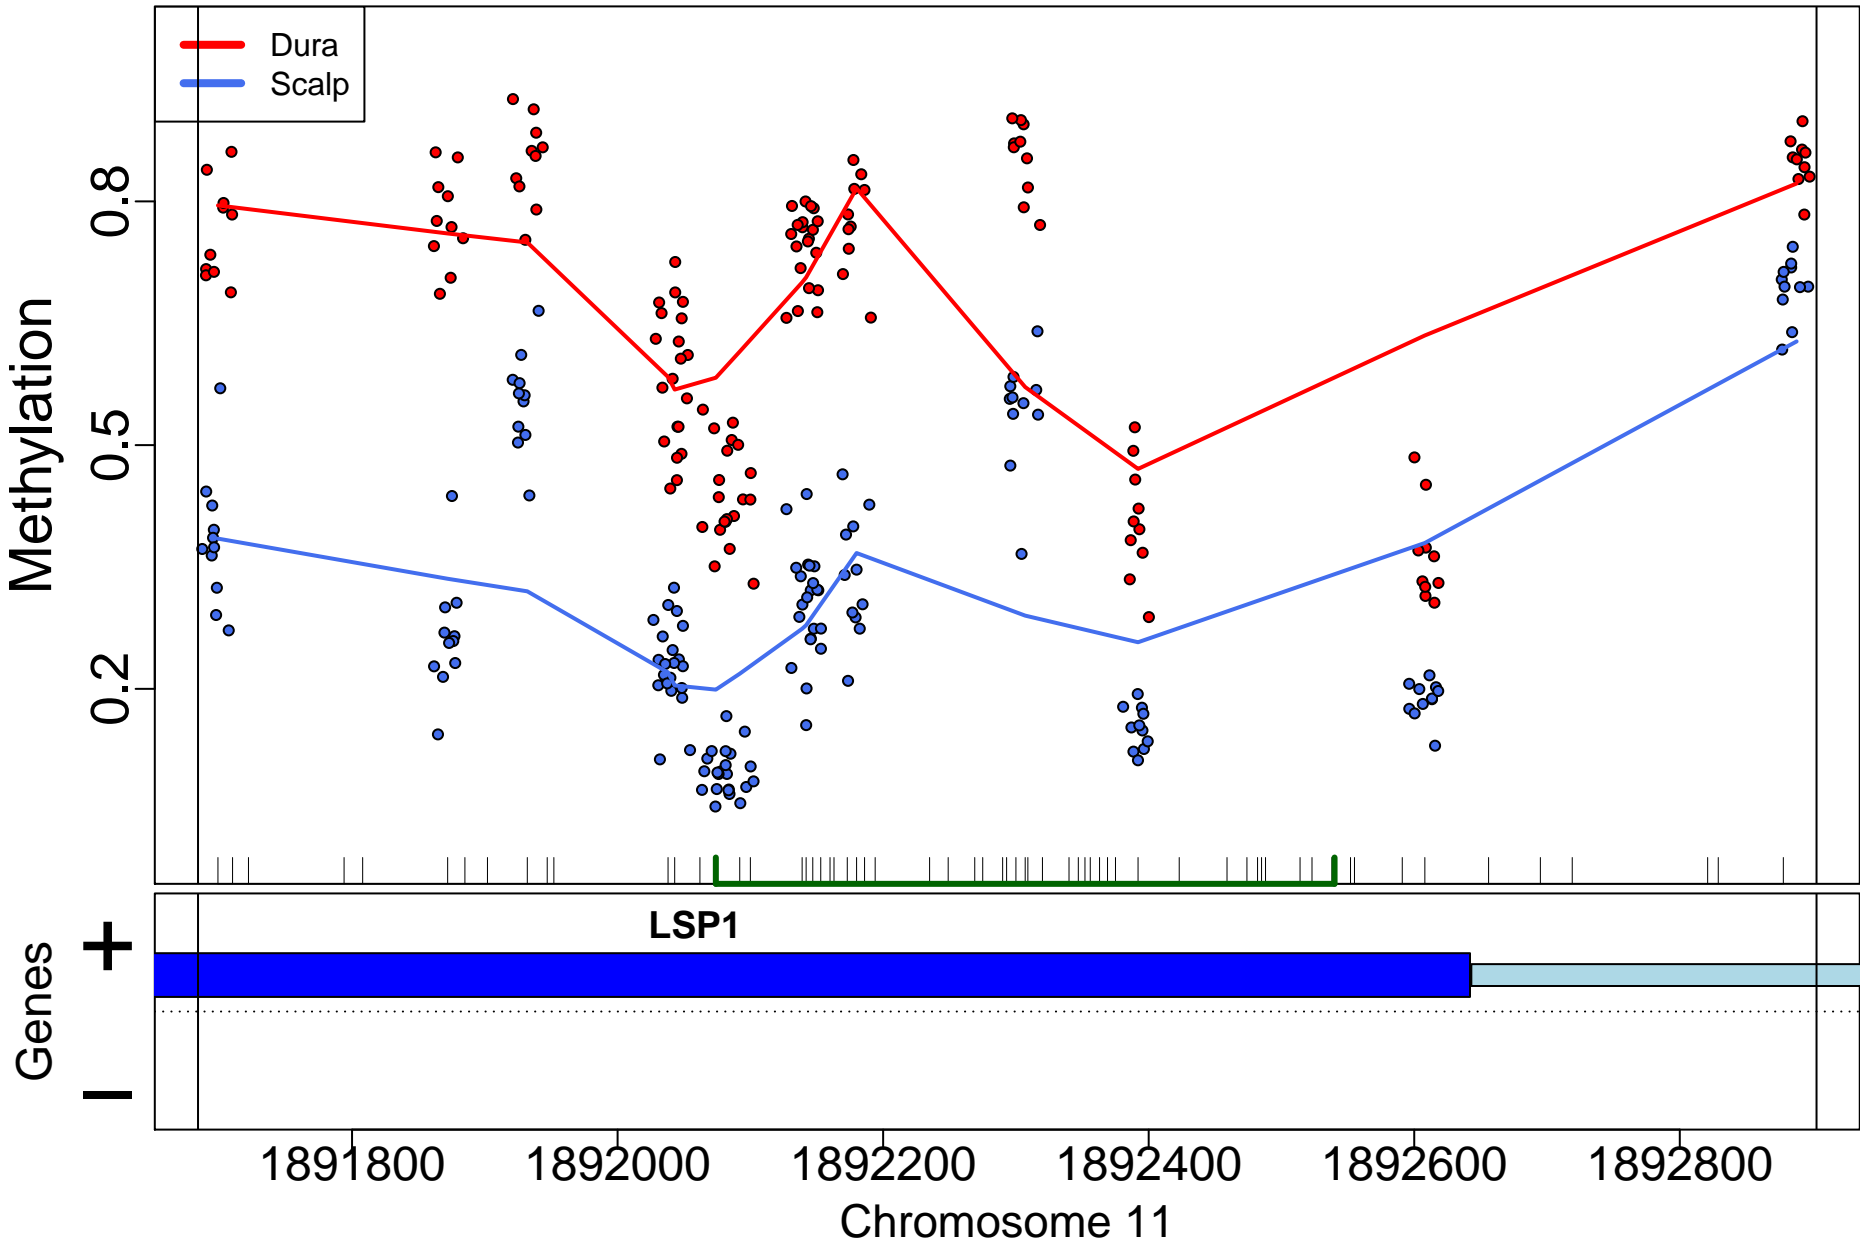

# HOXC6; 1234bp from tss:overlaps 3'

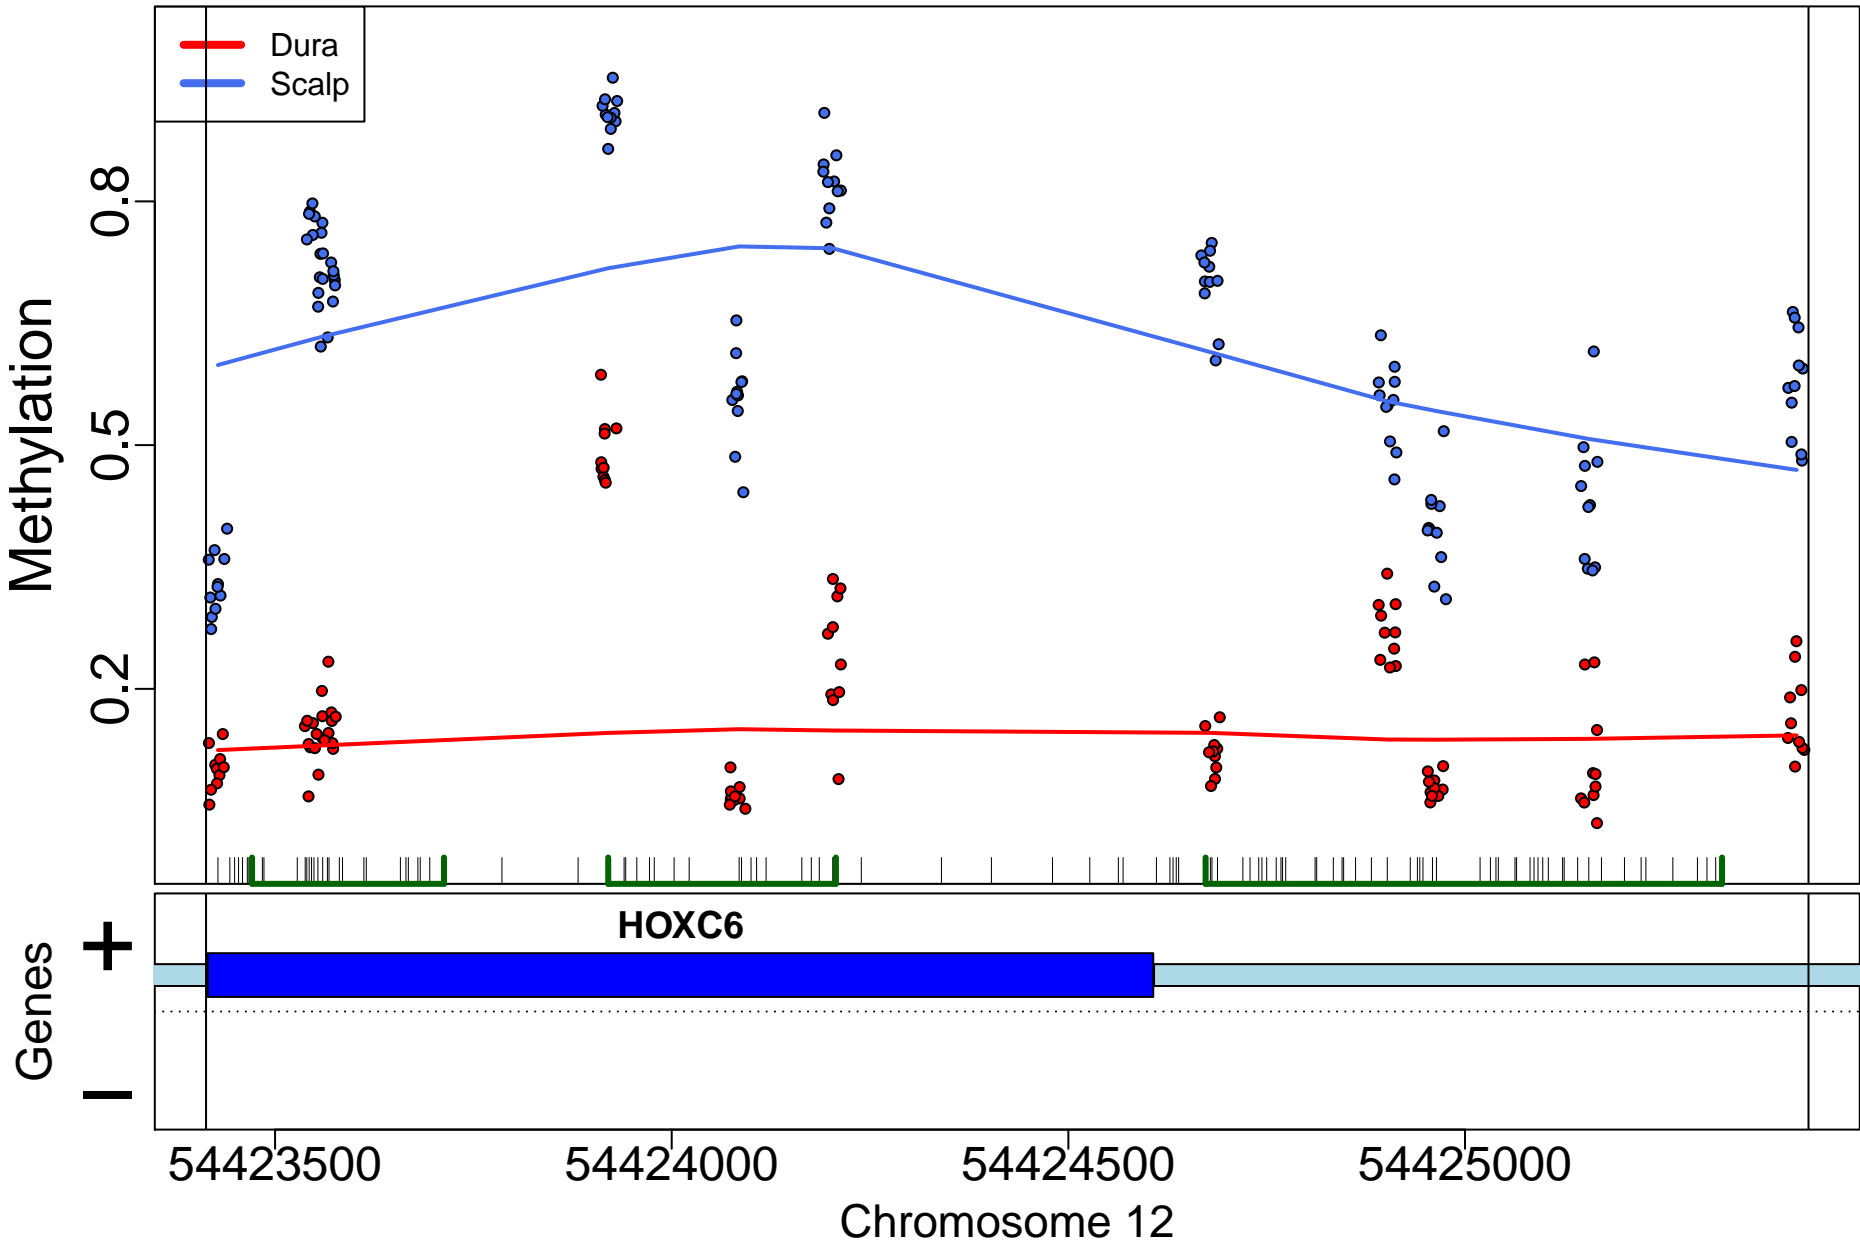



PRDM1; 99572bp from tss:upstream

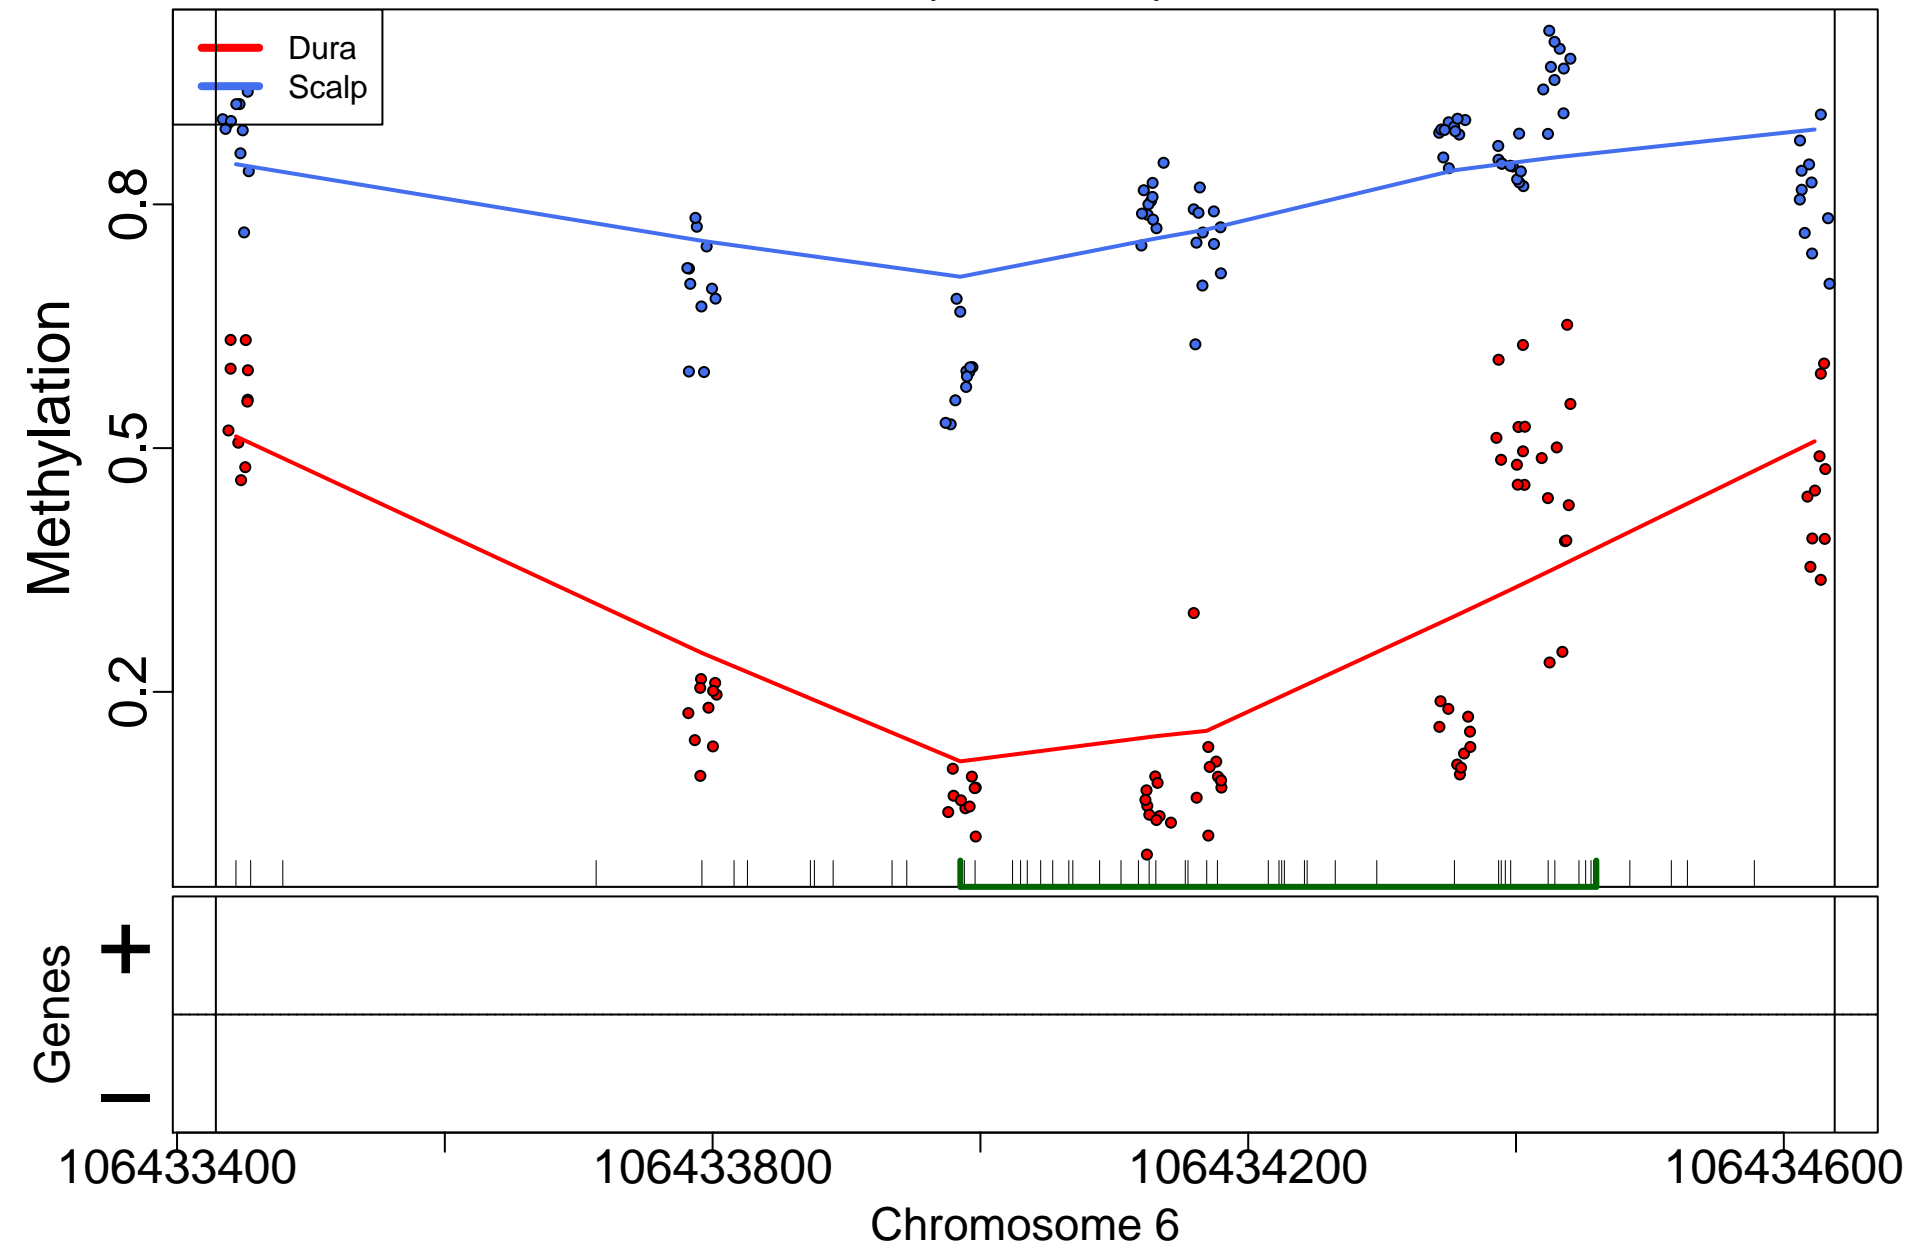

POU3F2; 8763bp from tss:downstream

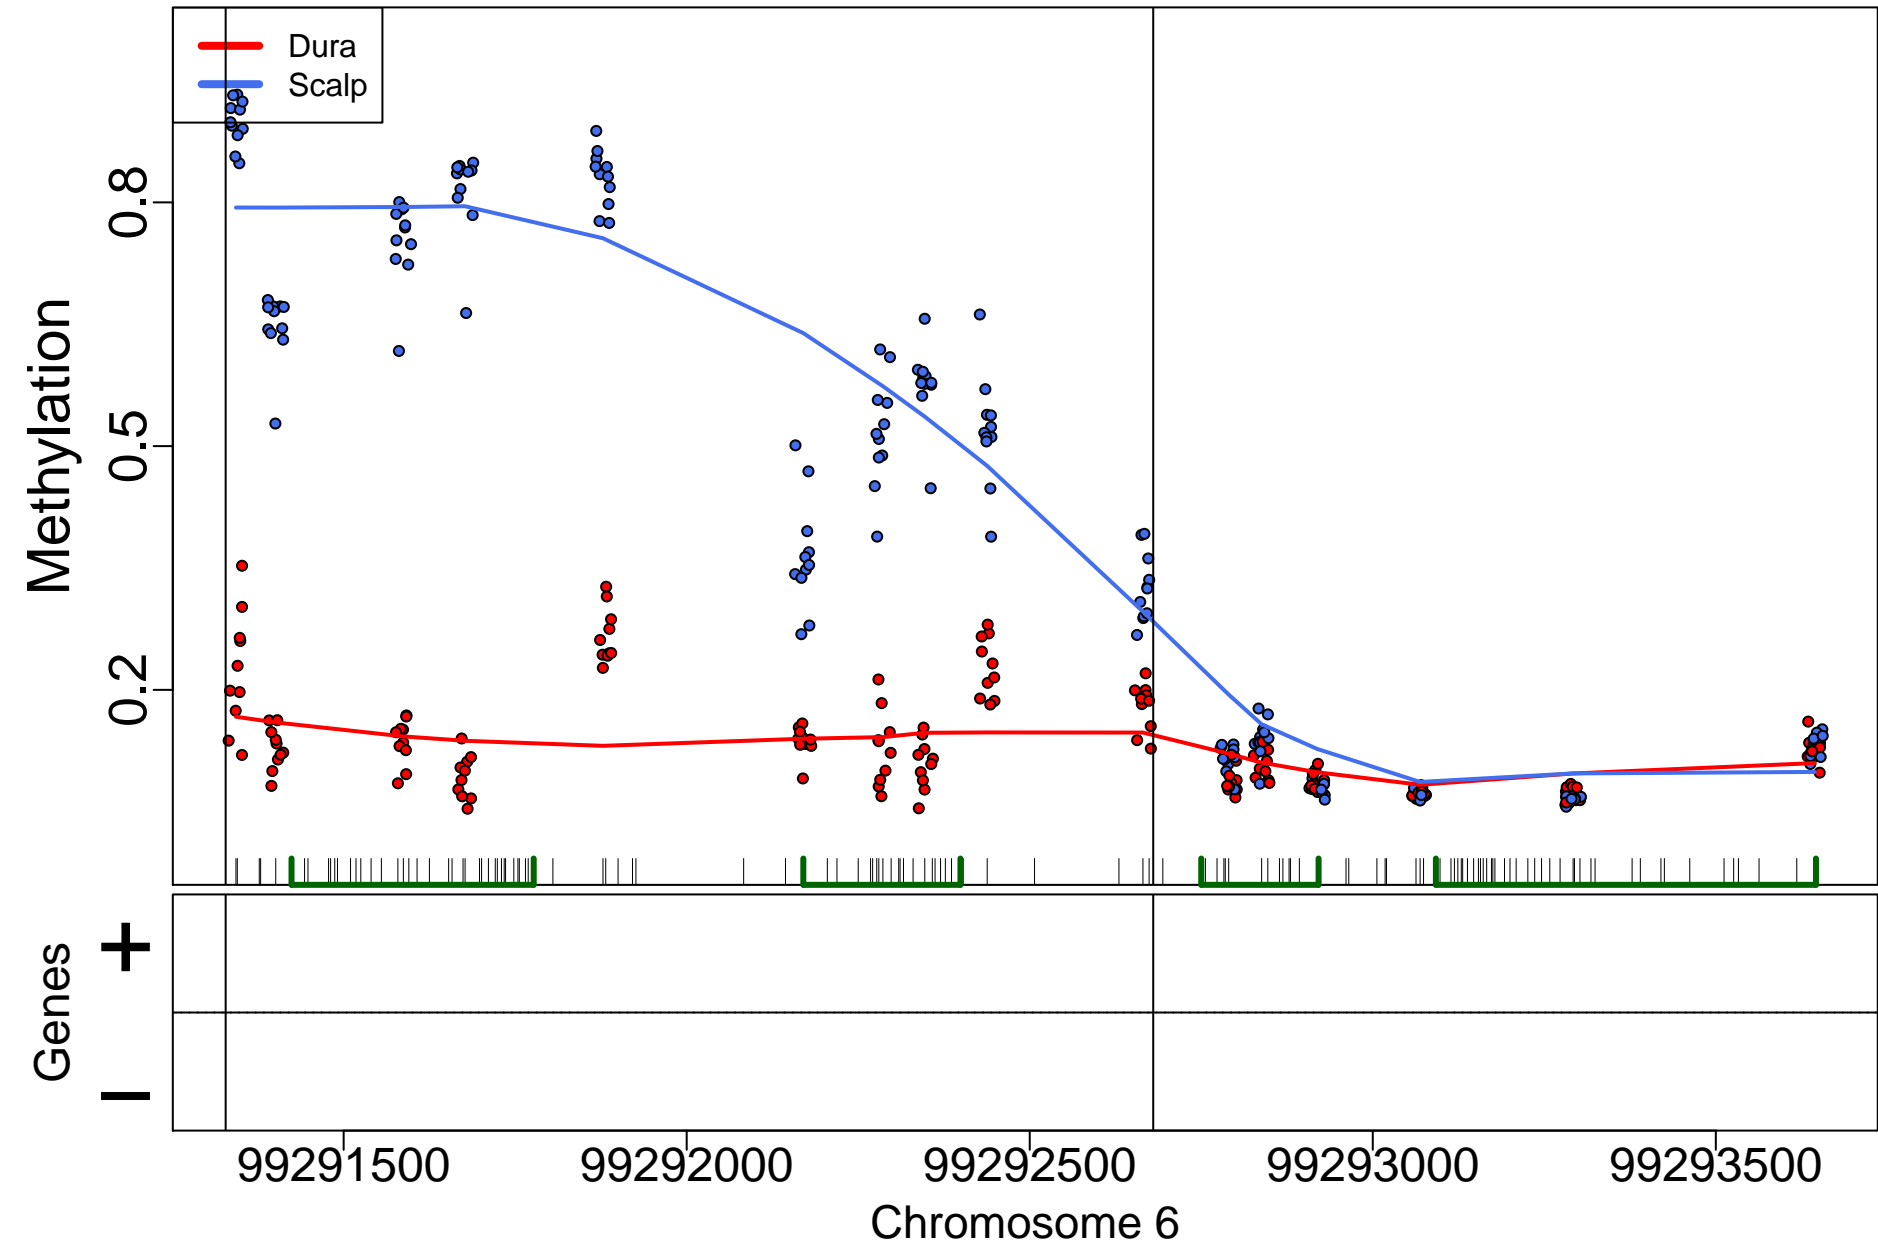

SPATA32; 0bp from tss:overlaps 5'

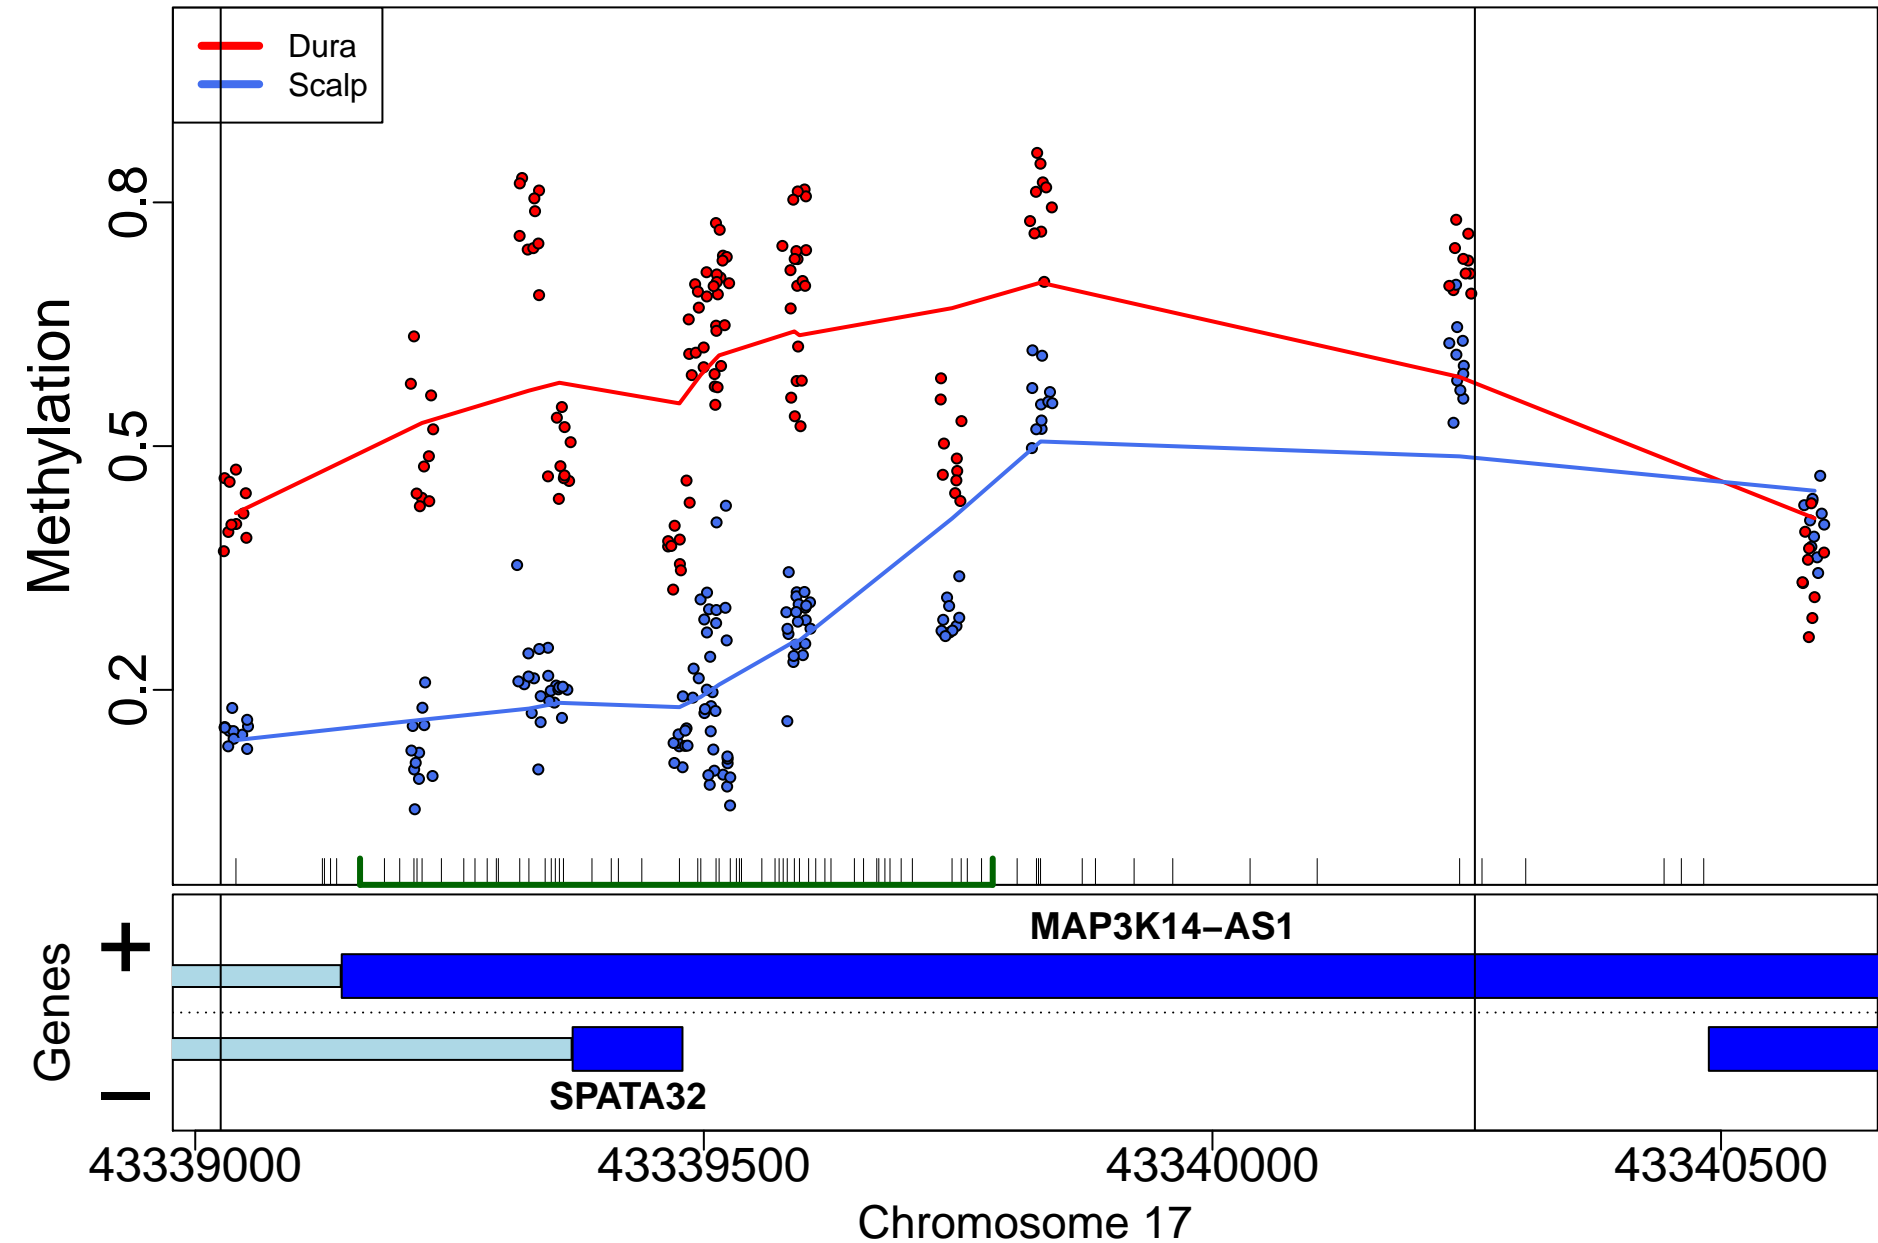

HOXB-AS3; 0bp from tss:NA

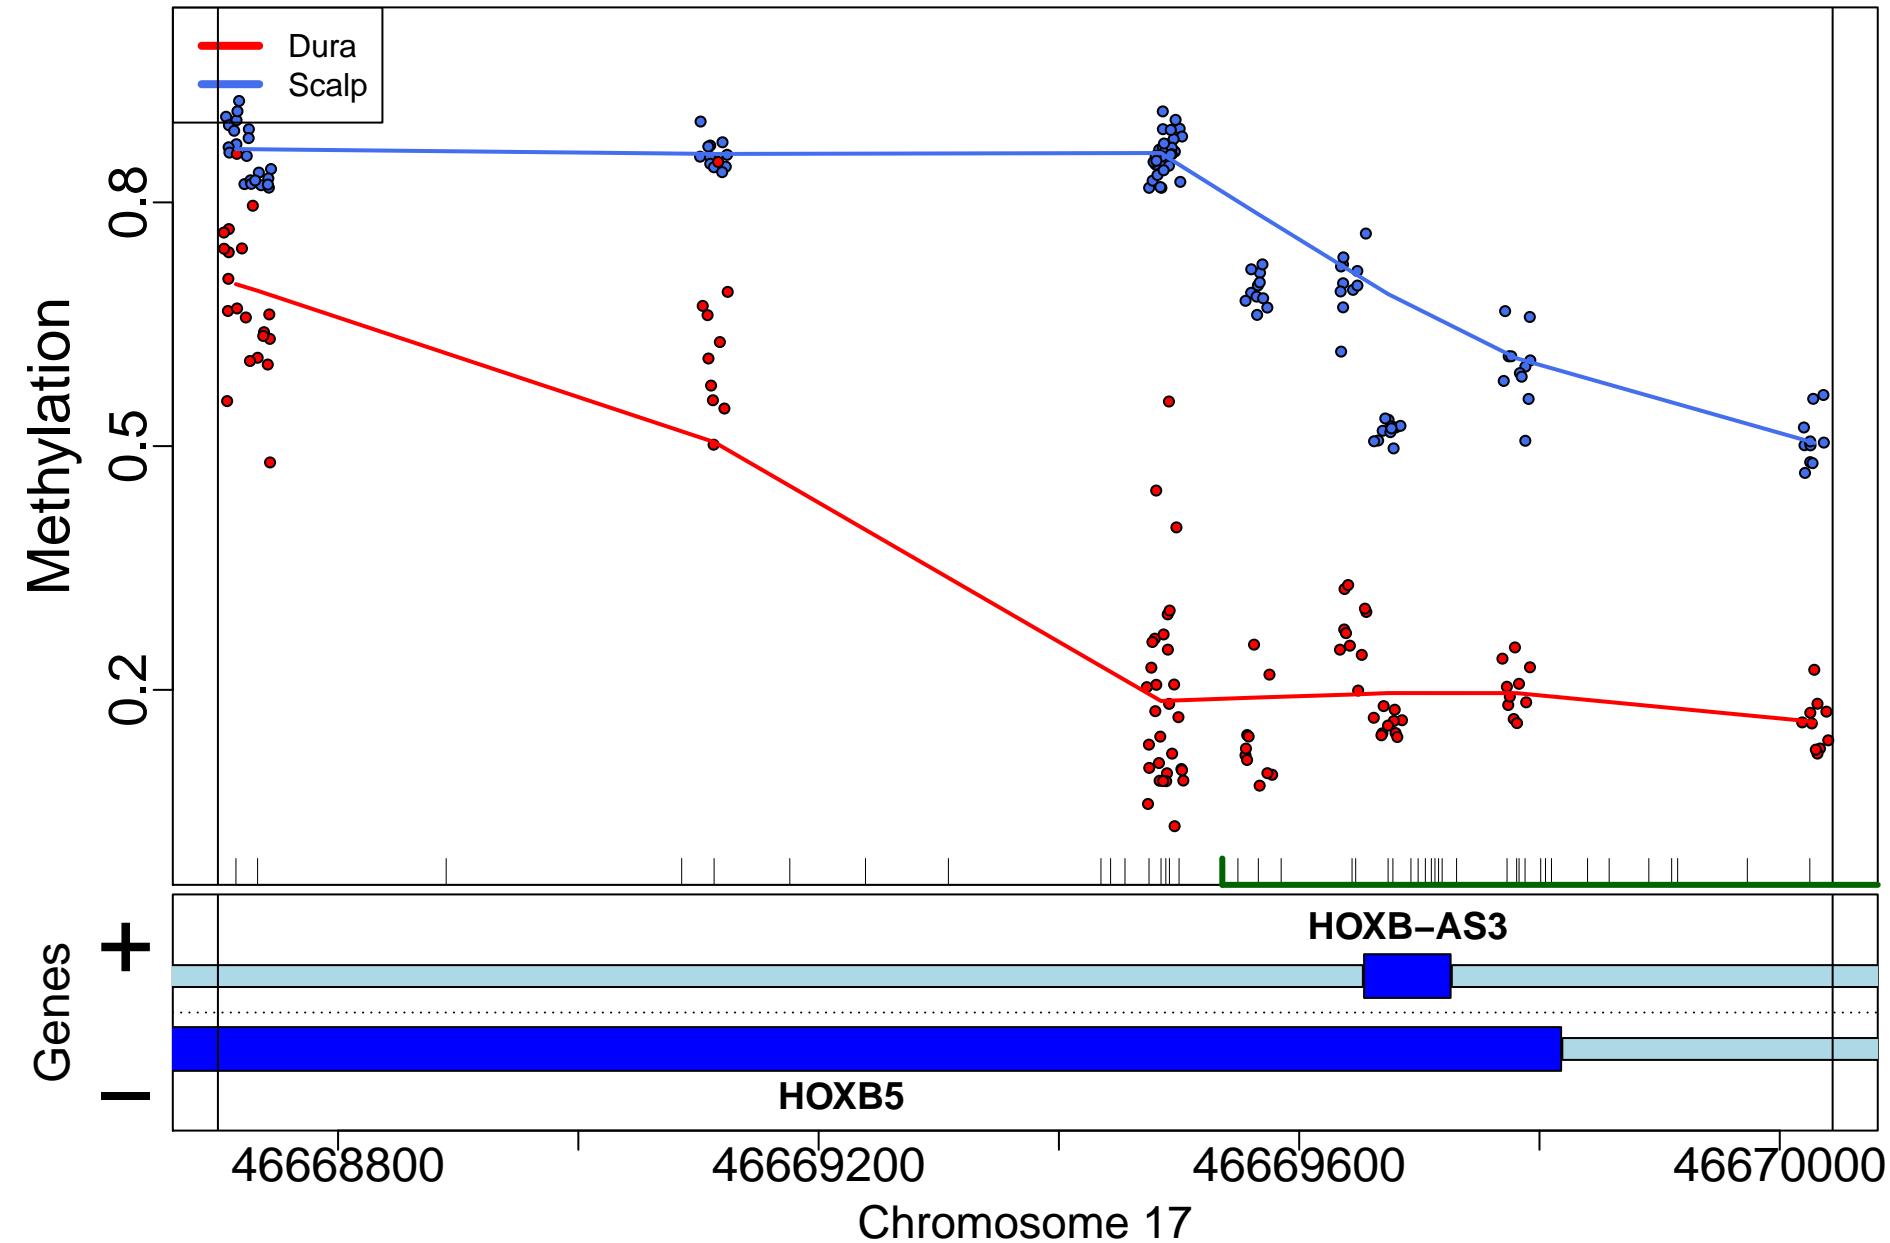

HOXB-AS3; 0bp from tss:overlaps 5'

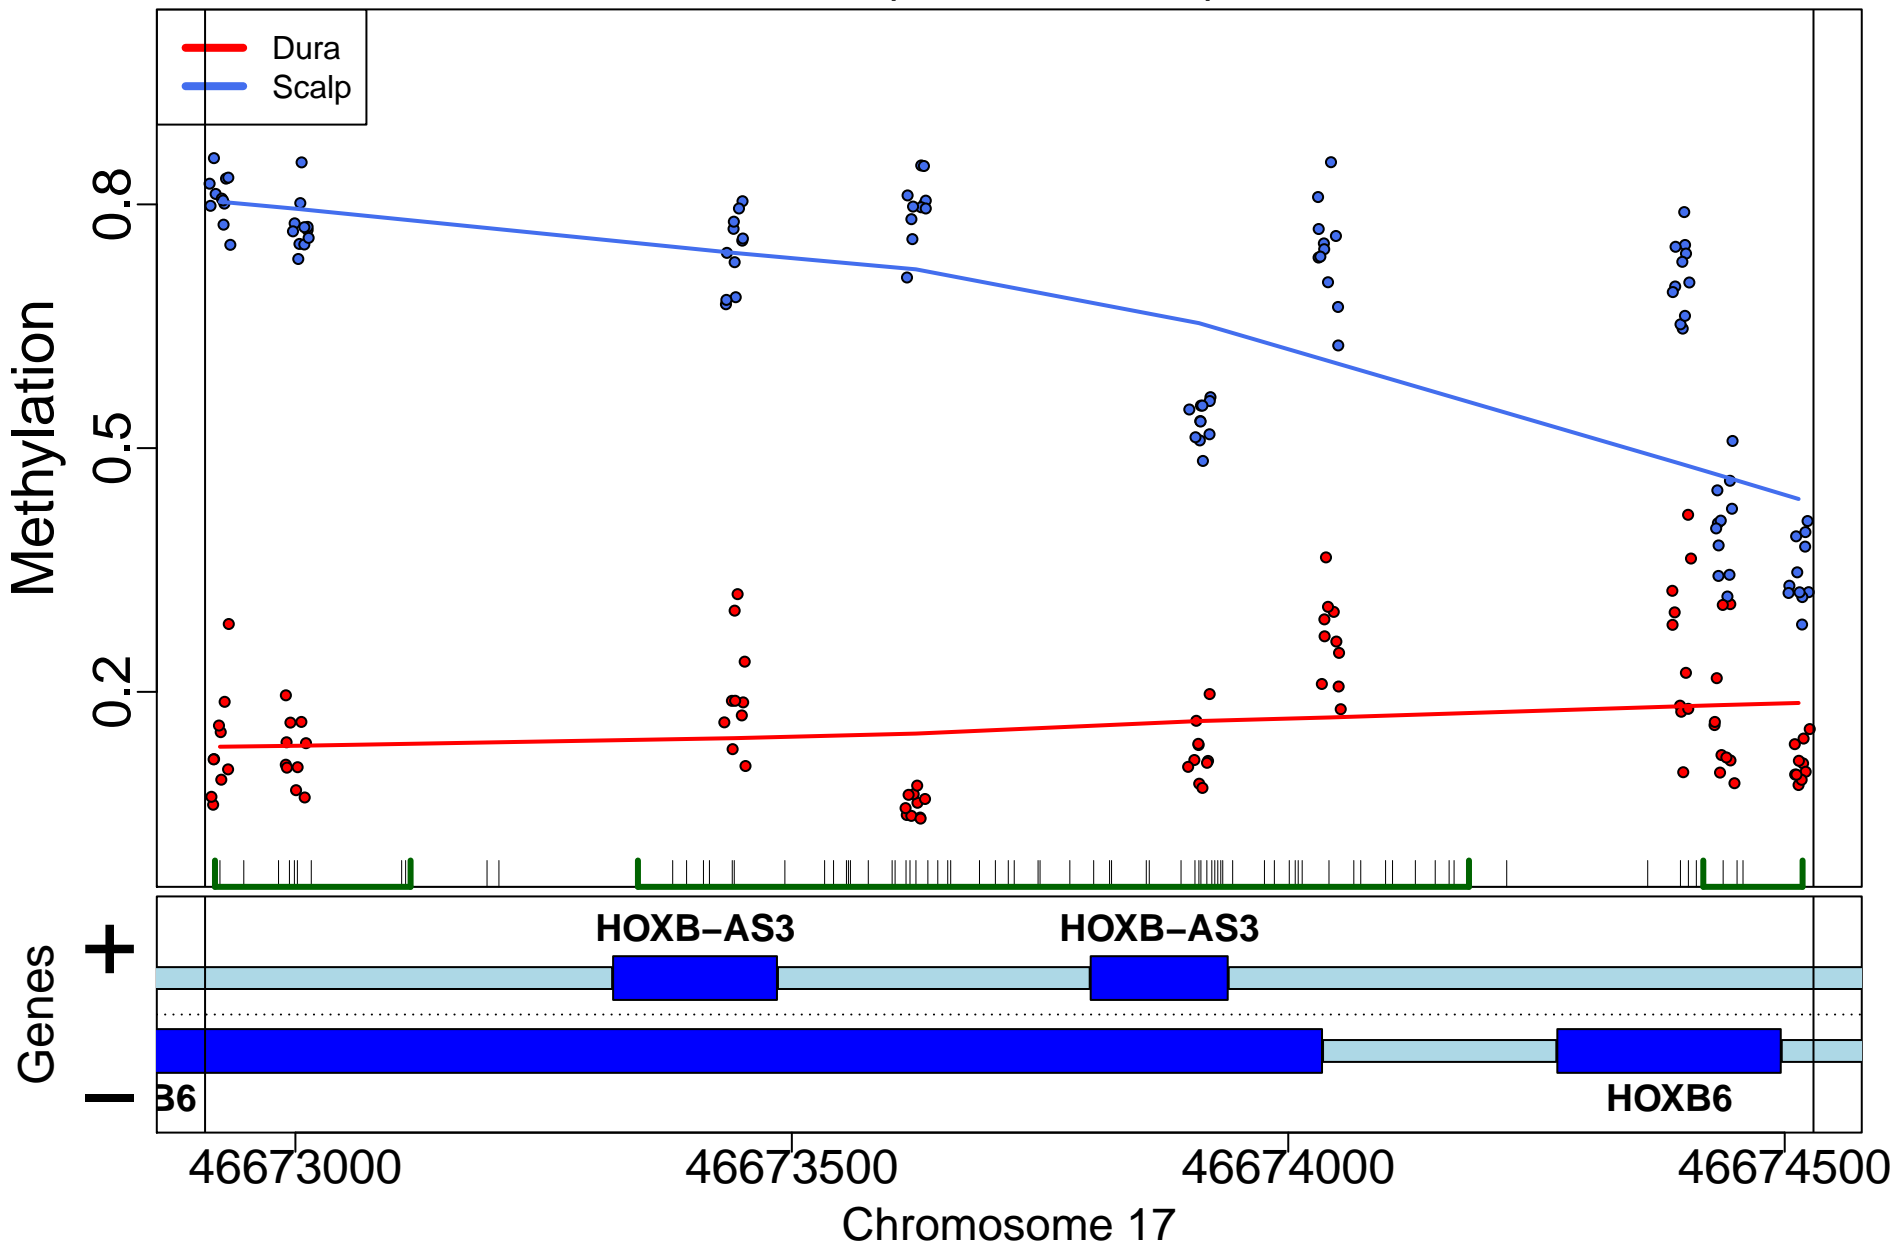

ARHGAP18; 0bp from tss:overlaps 5'

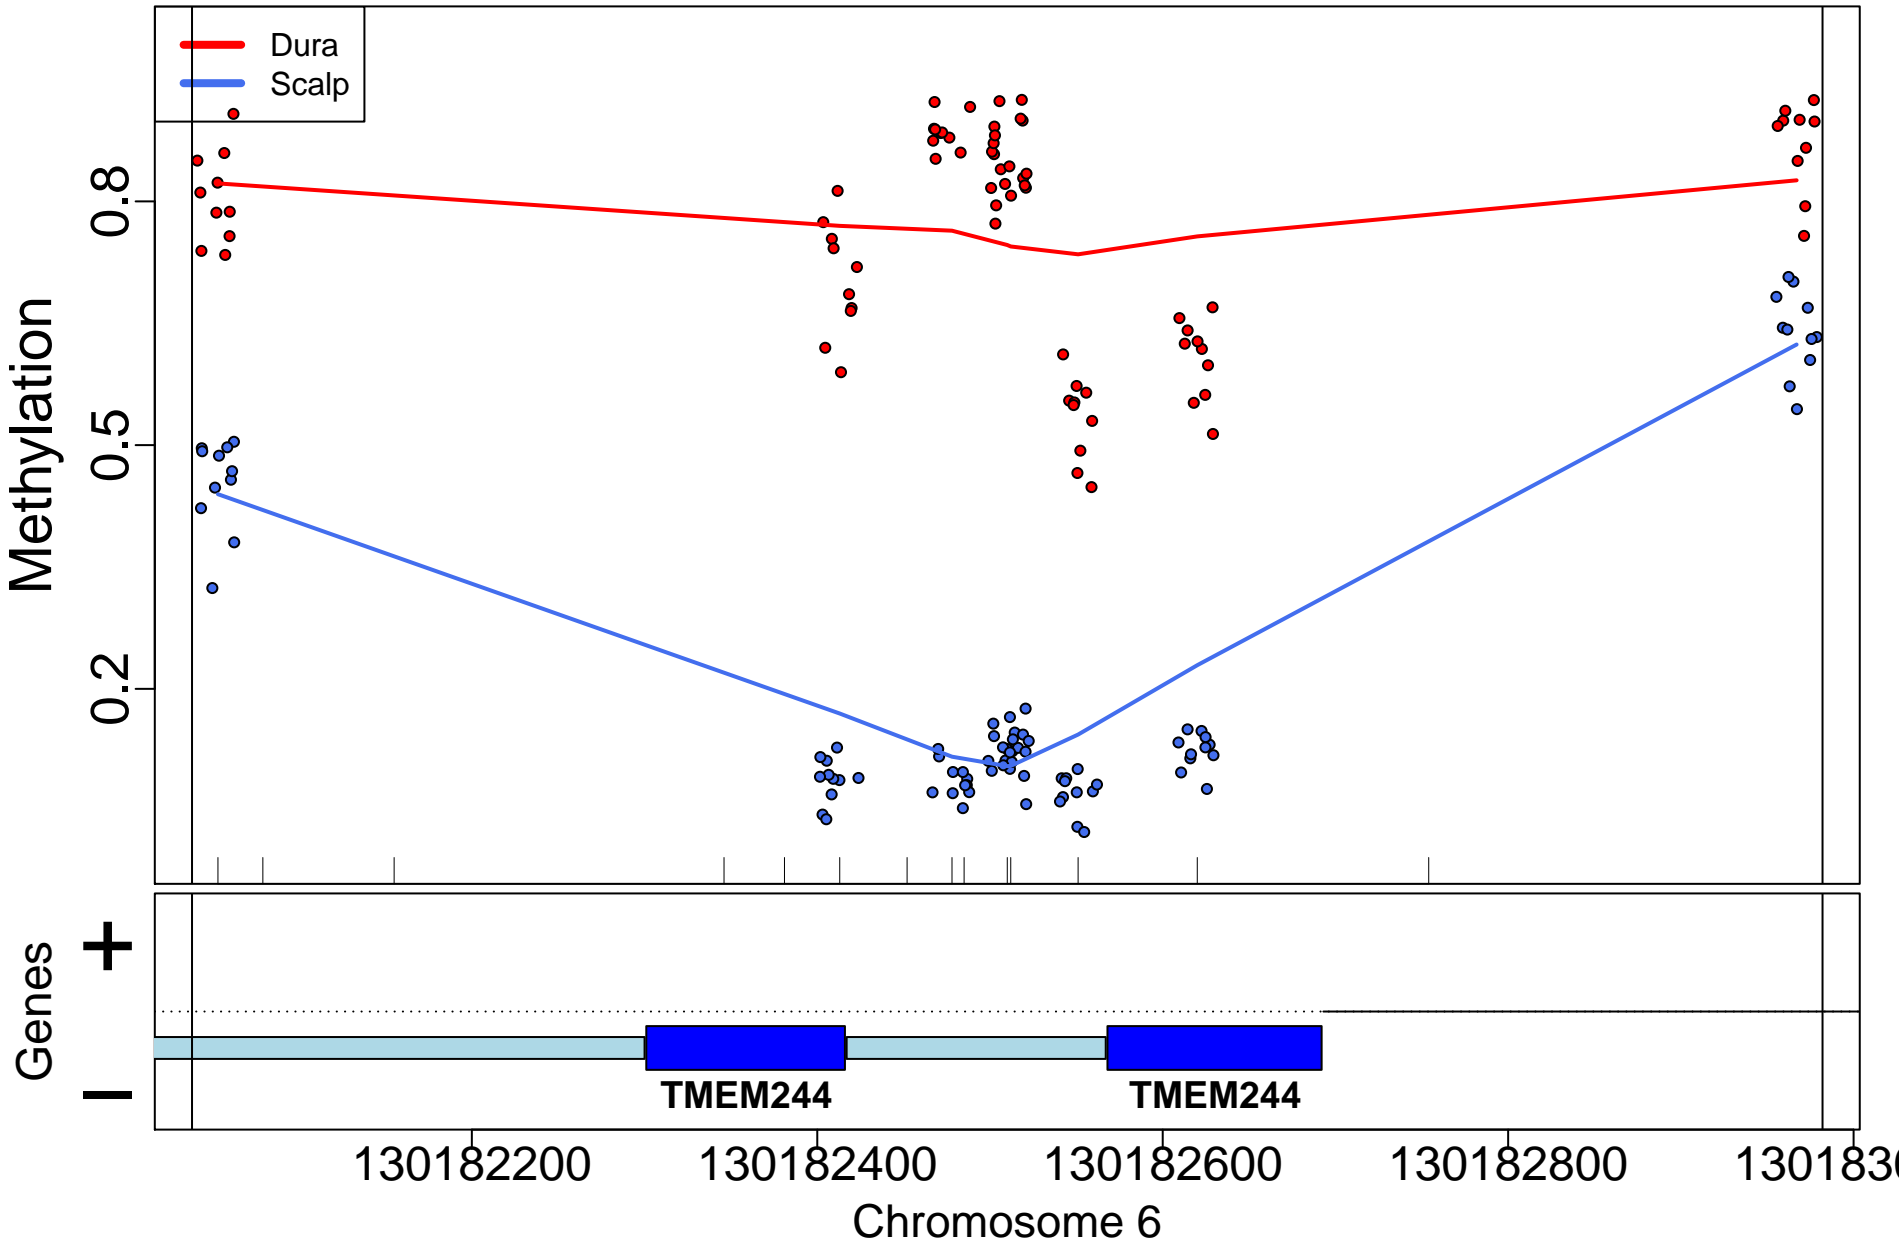

# EBF3; 1585bp from tss:promoter

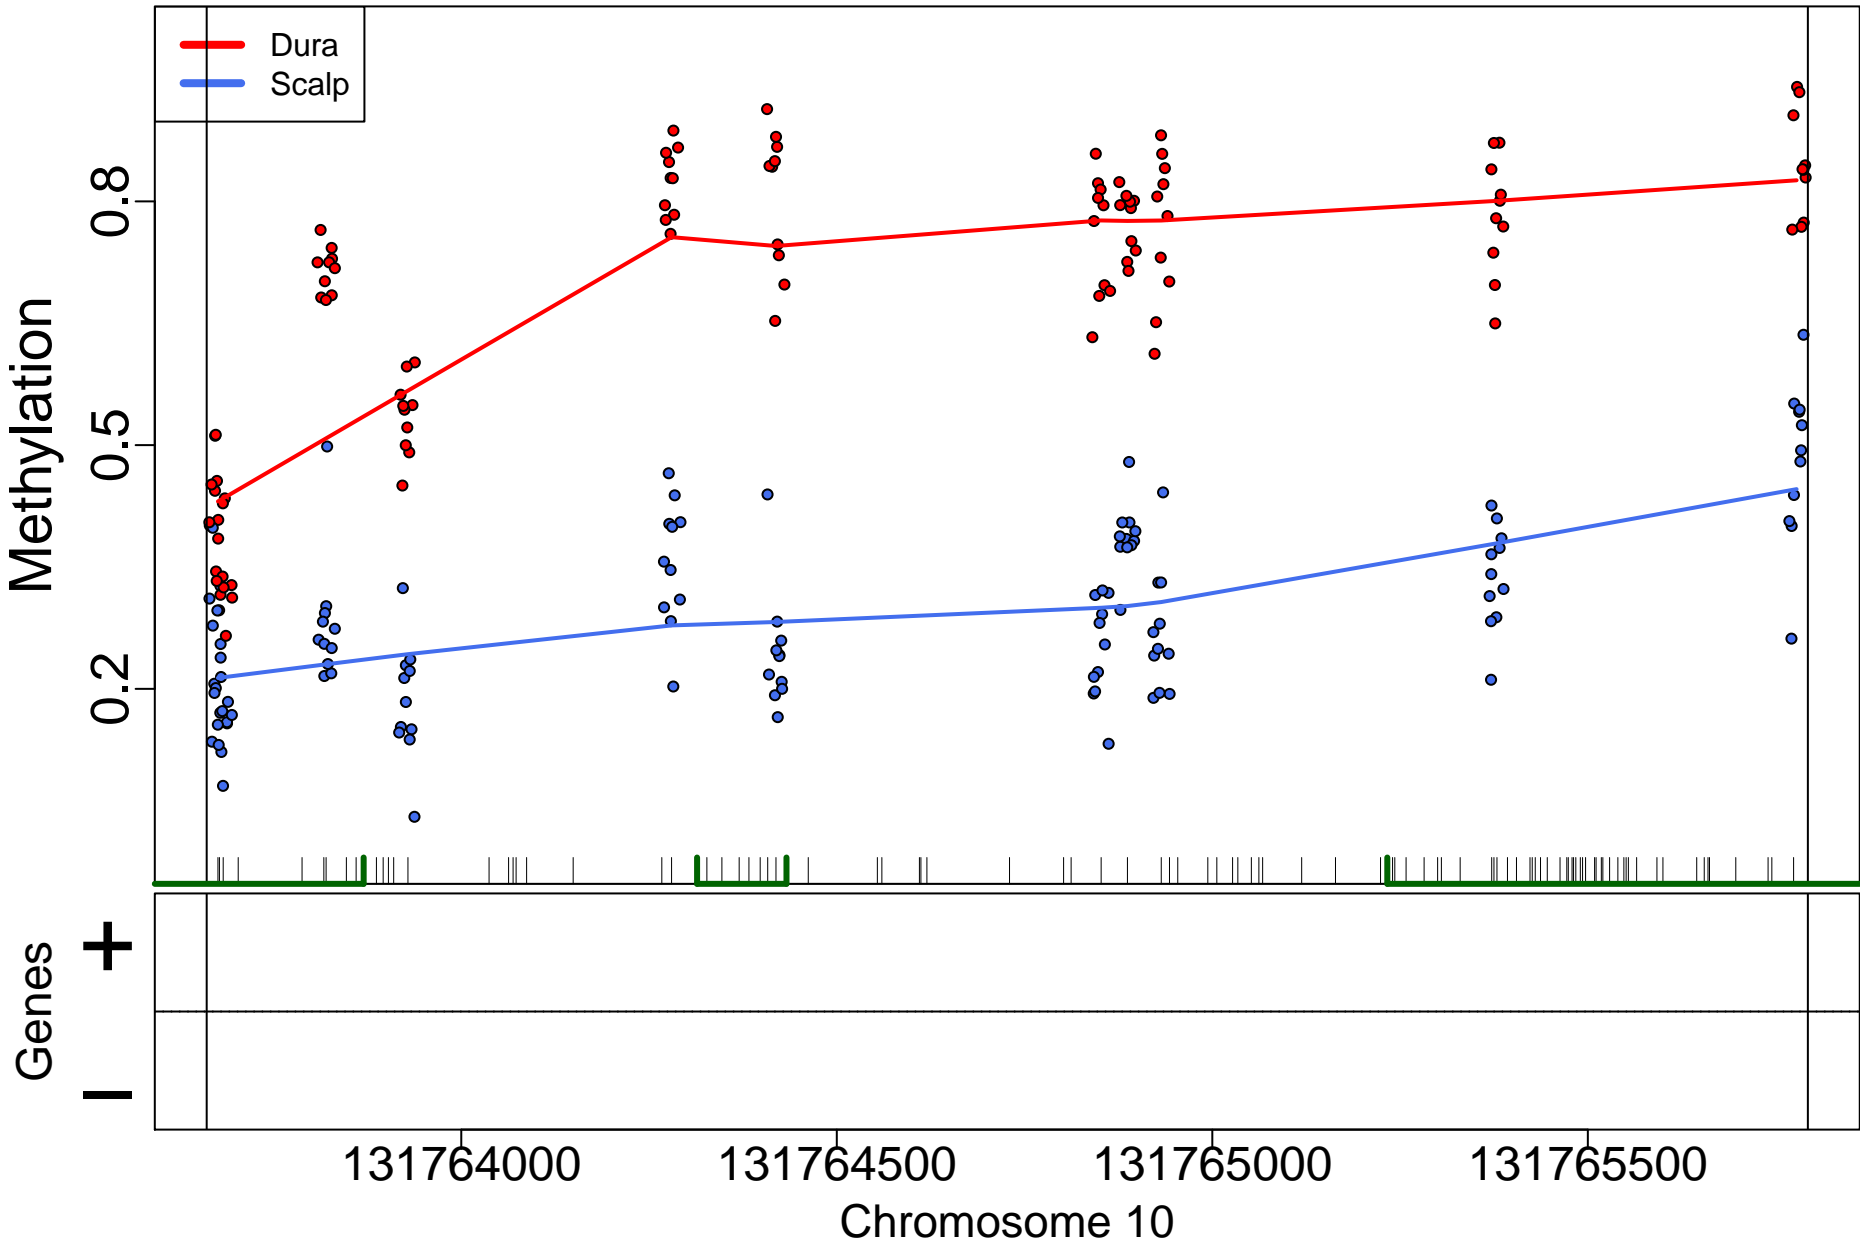

EGFR; 0bp from tss:NA

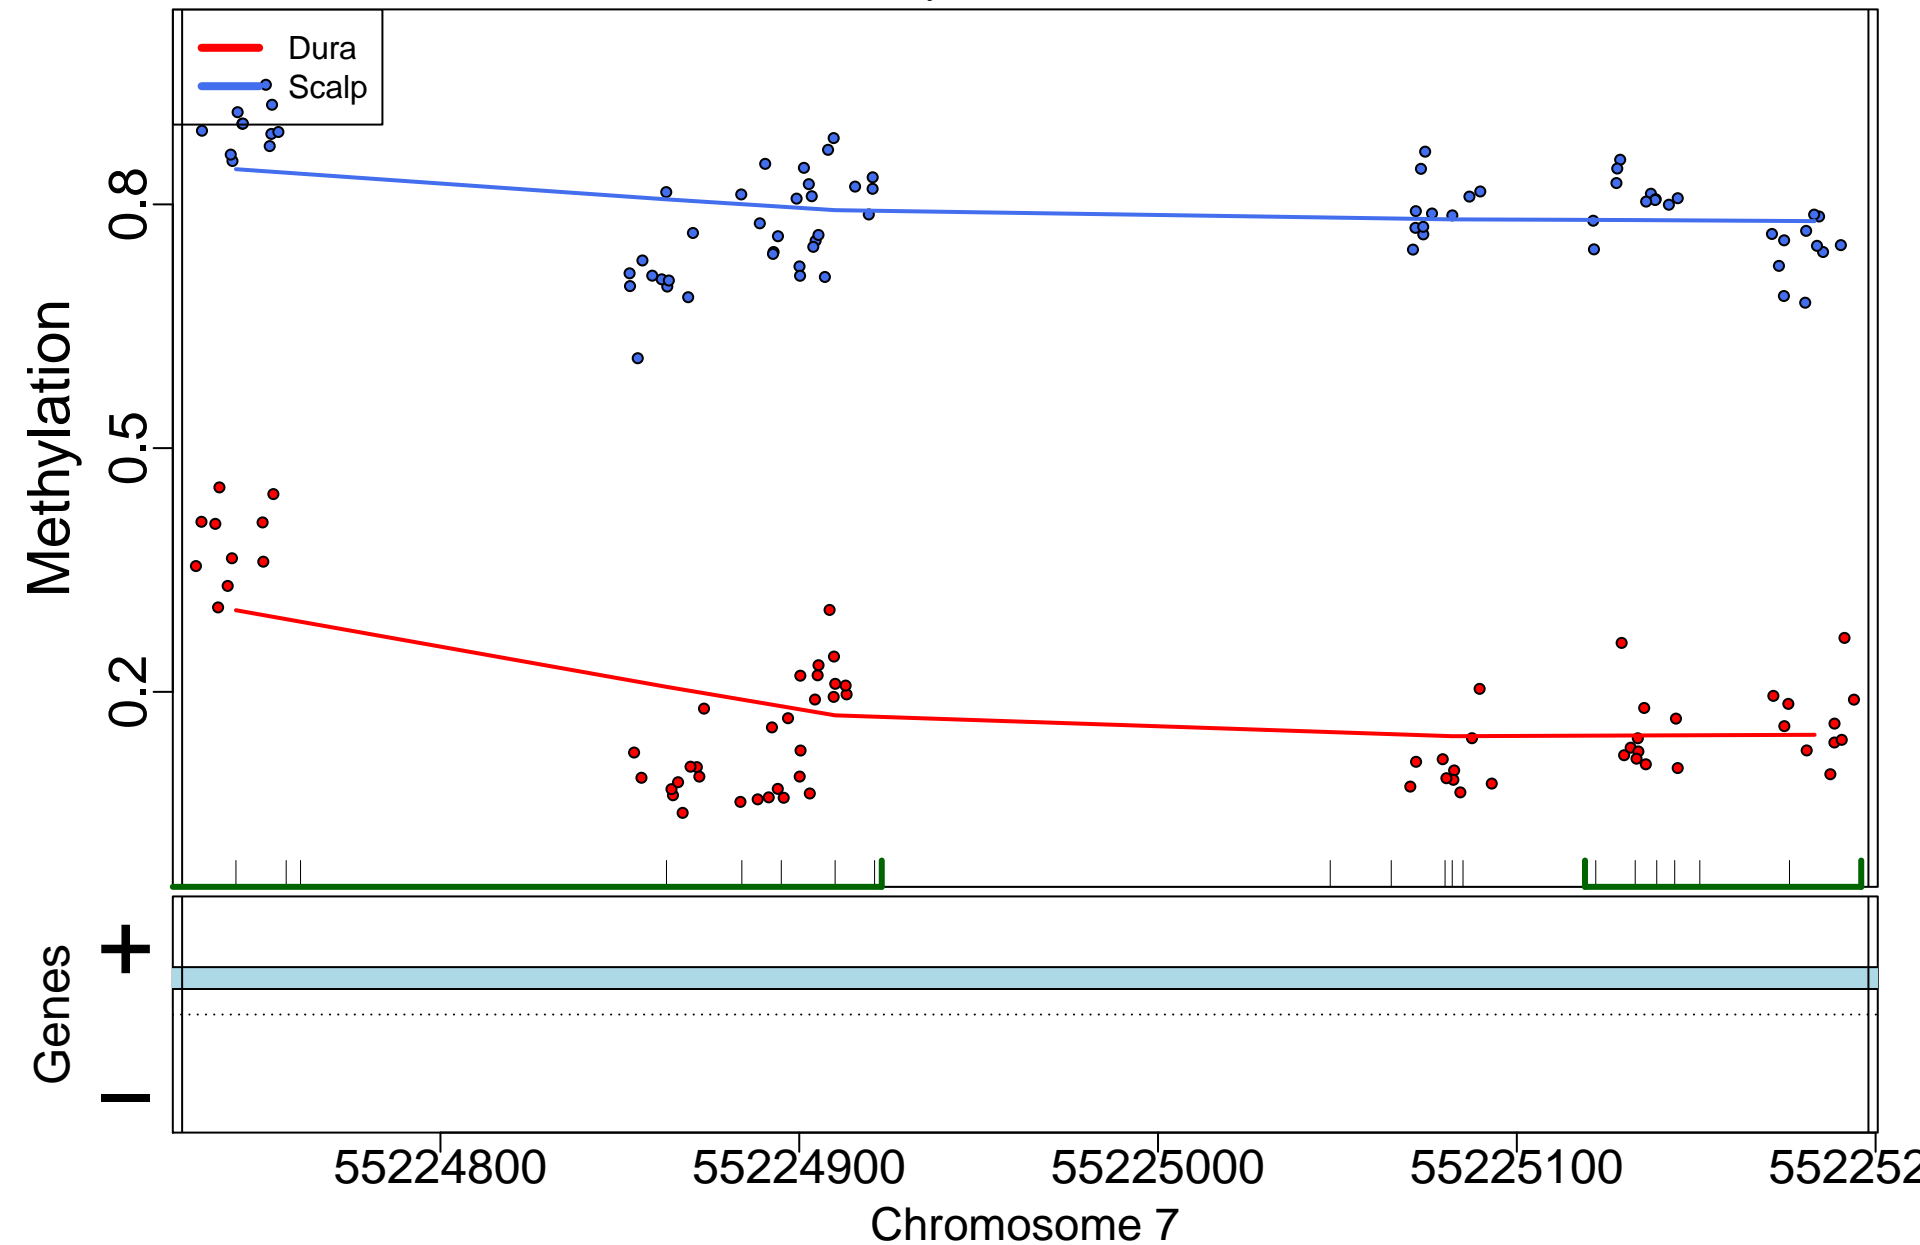



EN1; 8730bp from tss:upstream

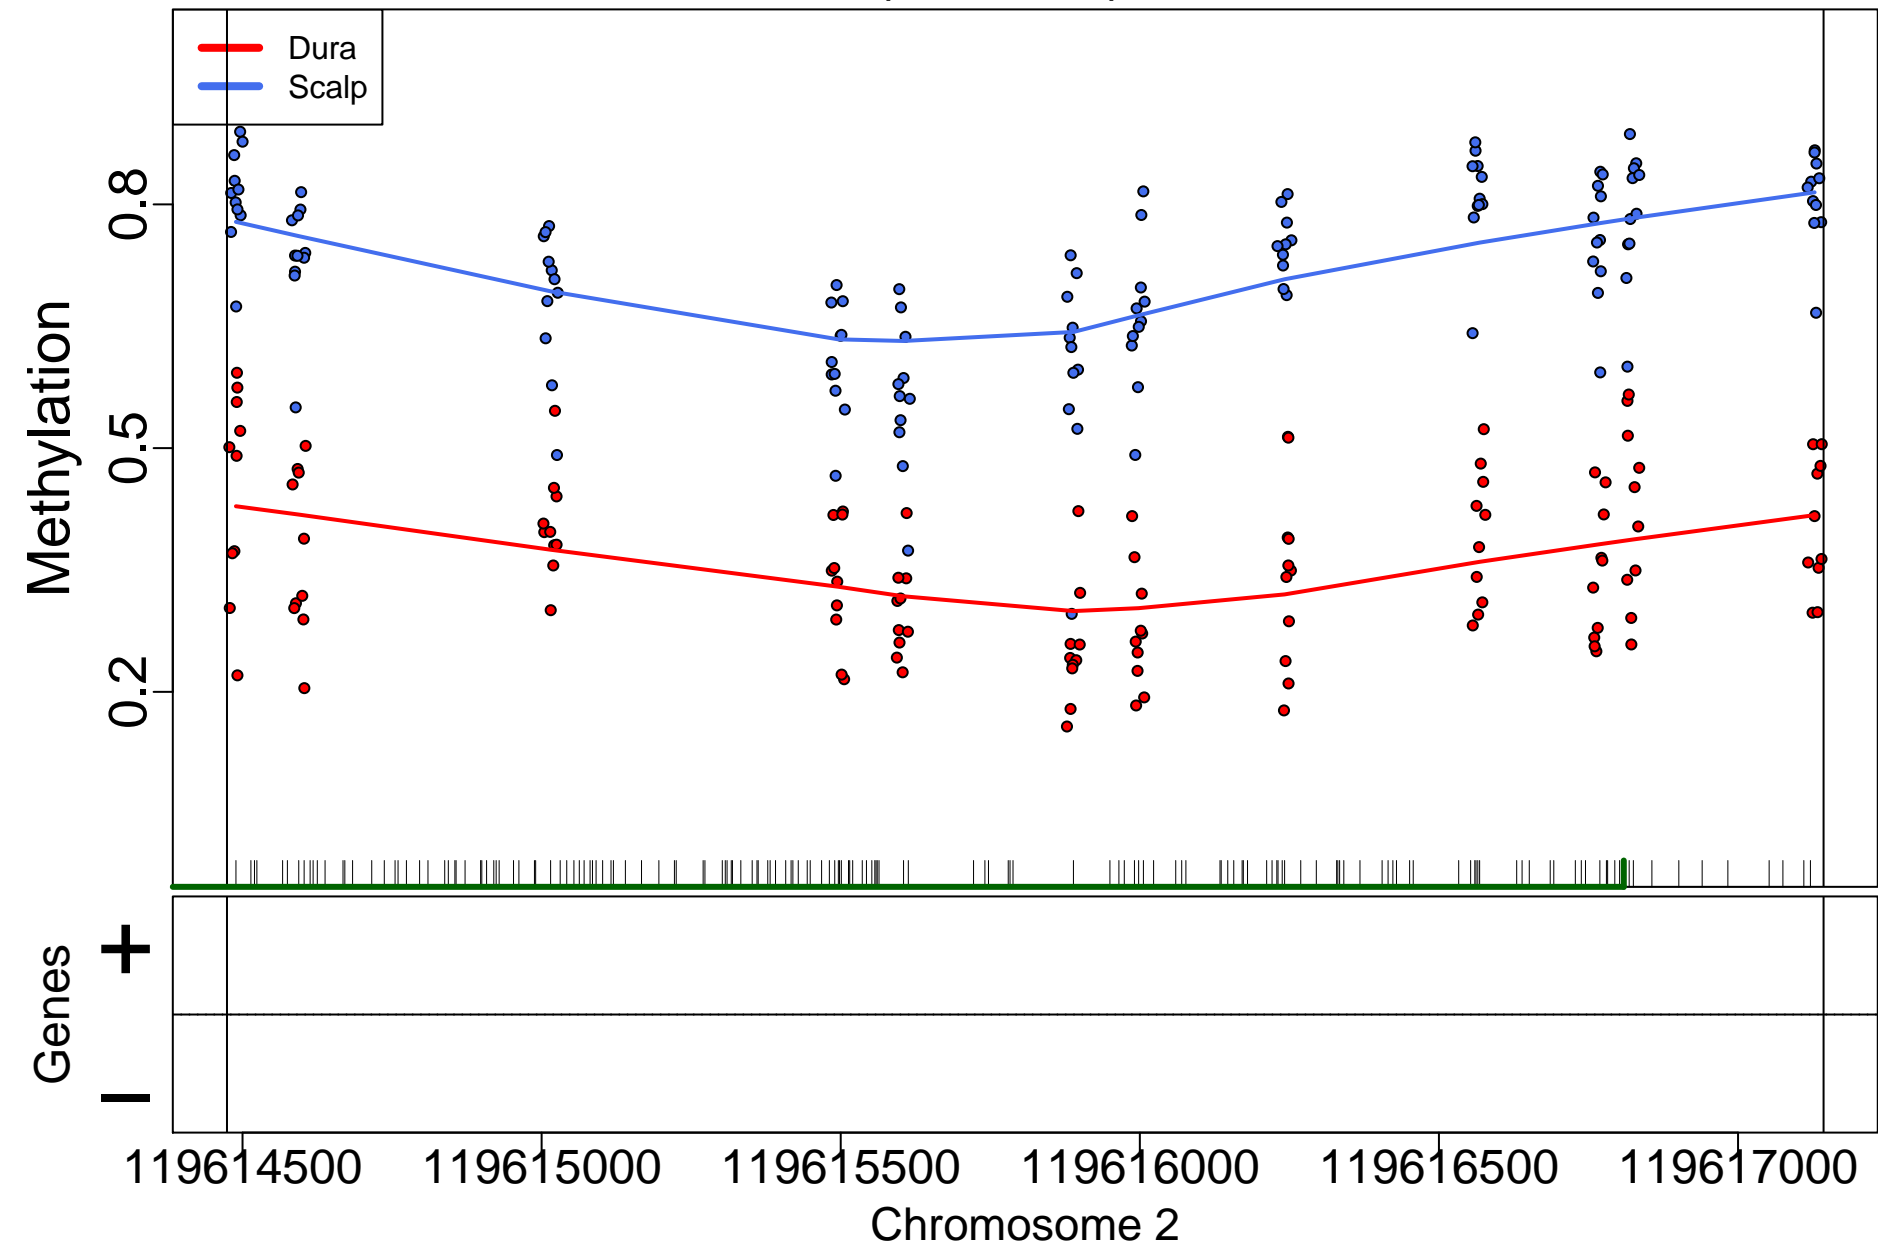

SMAD3; 0bp from tss:overlaps 5'

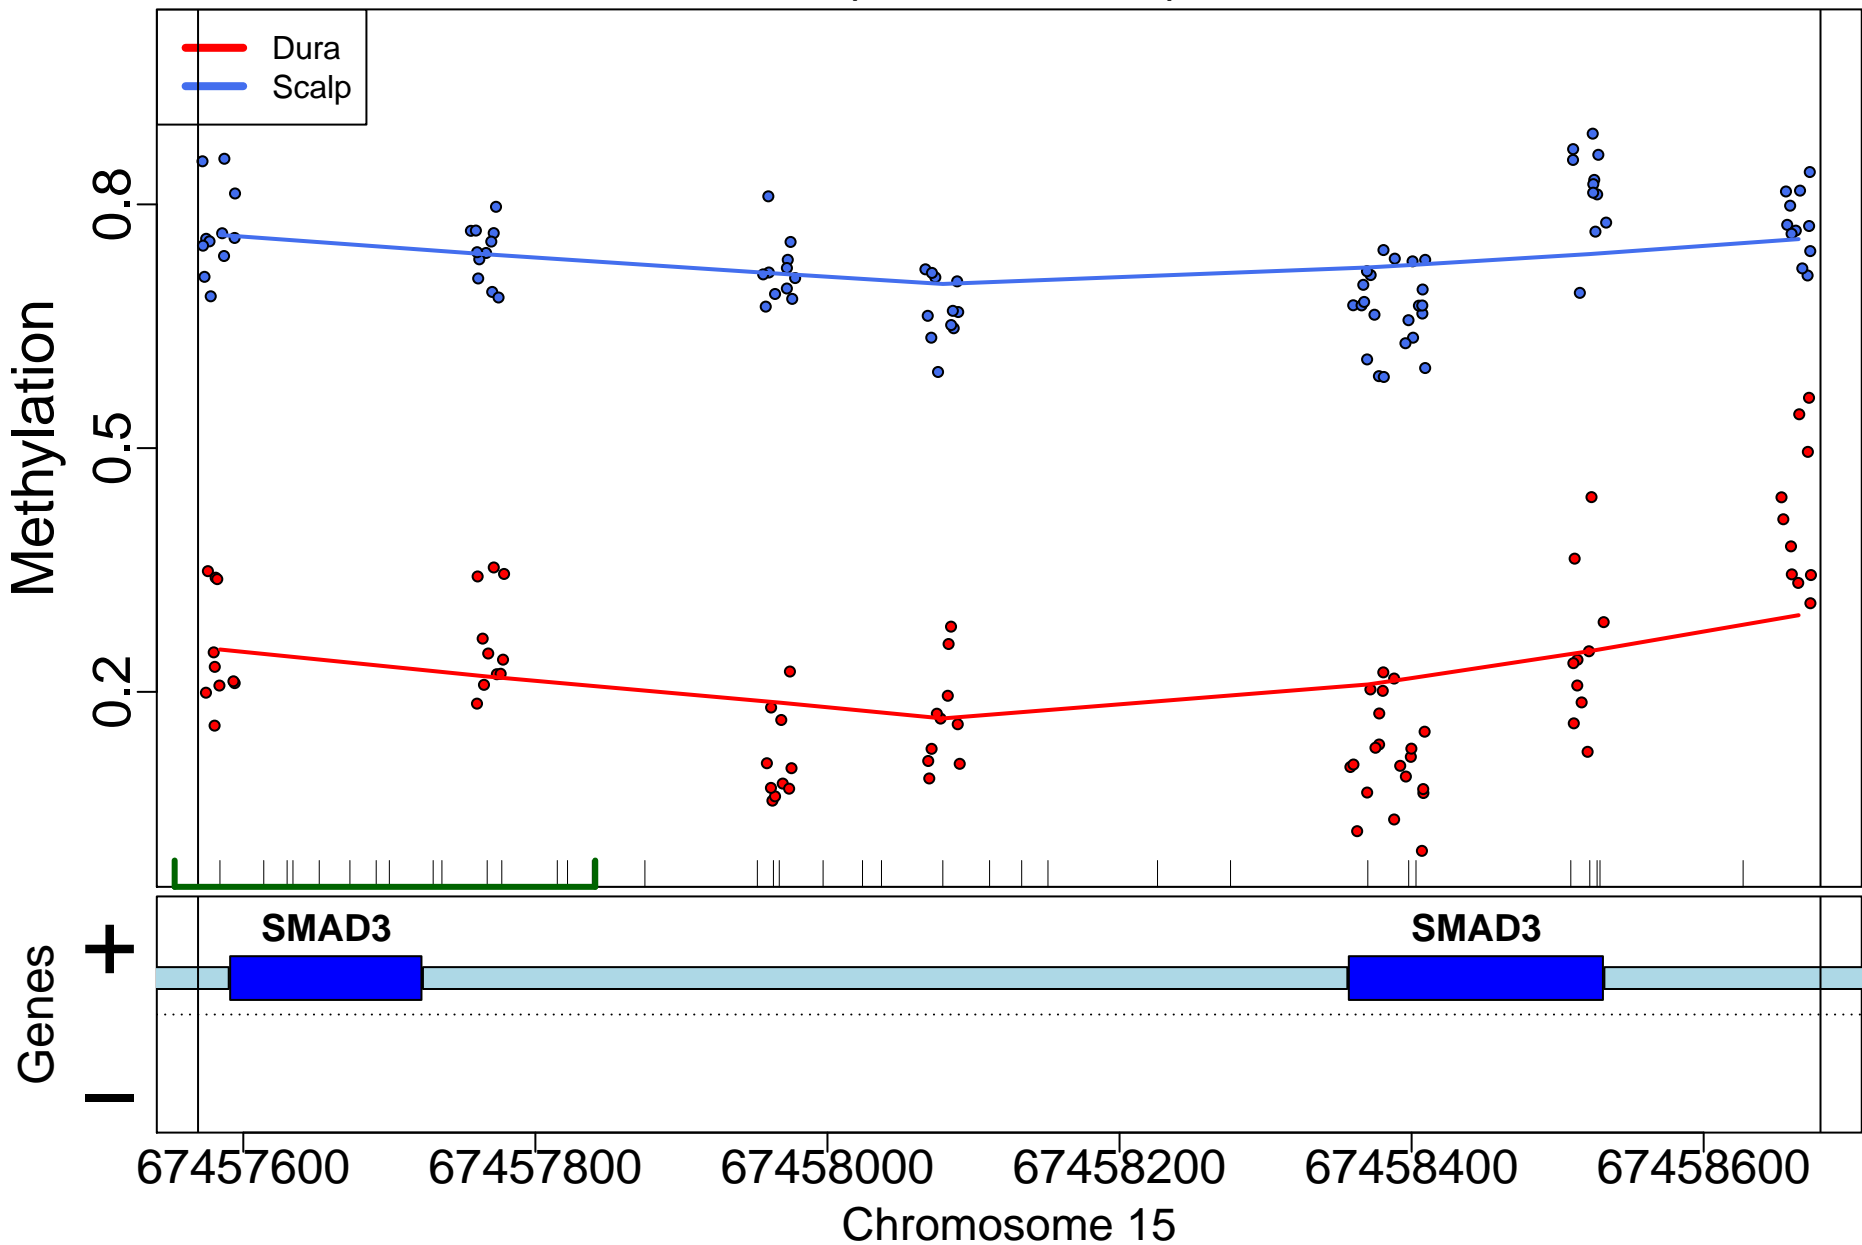

# SIX1; 6153bp from tss:downstream

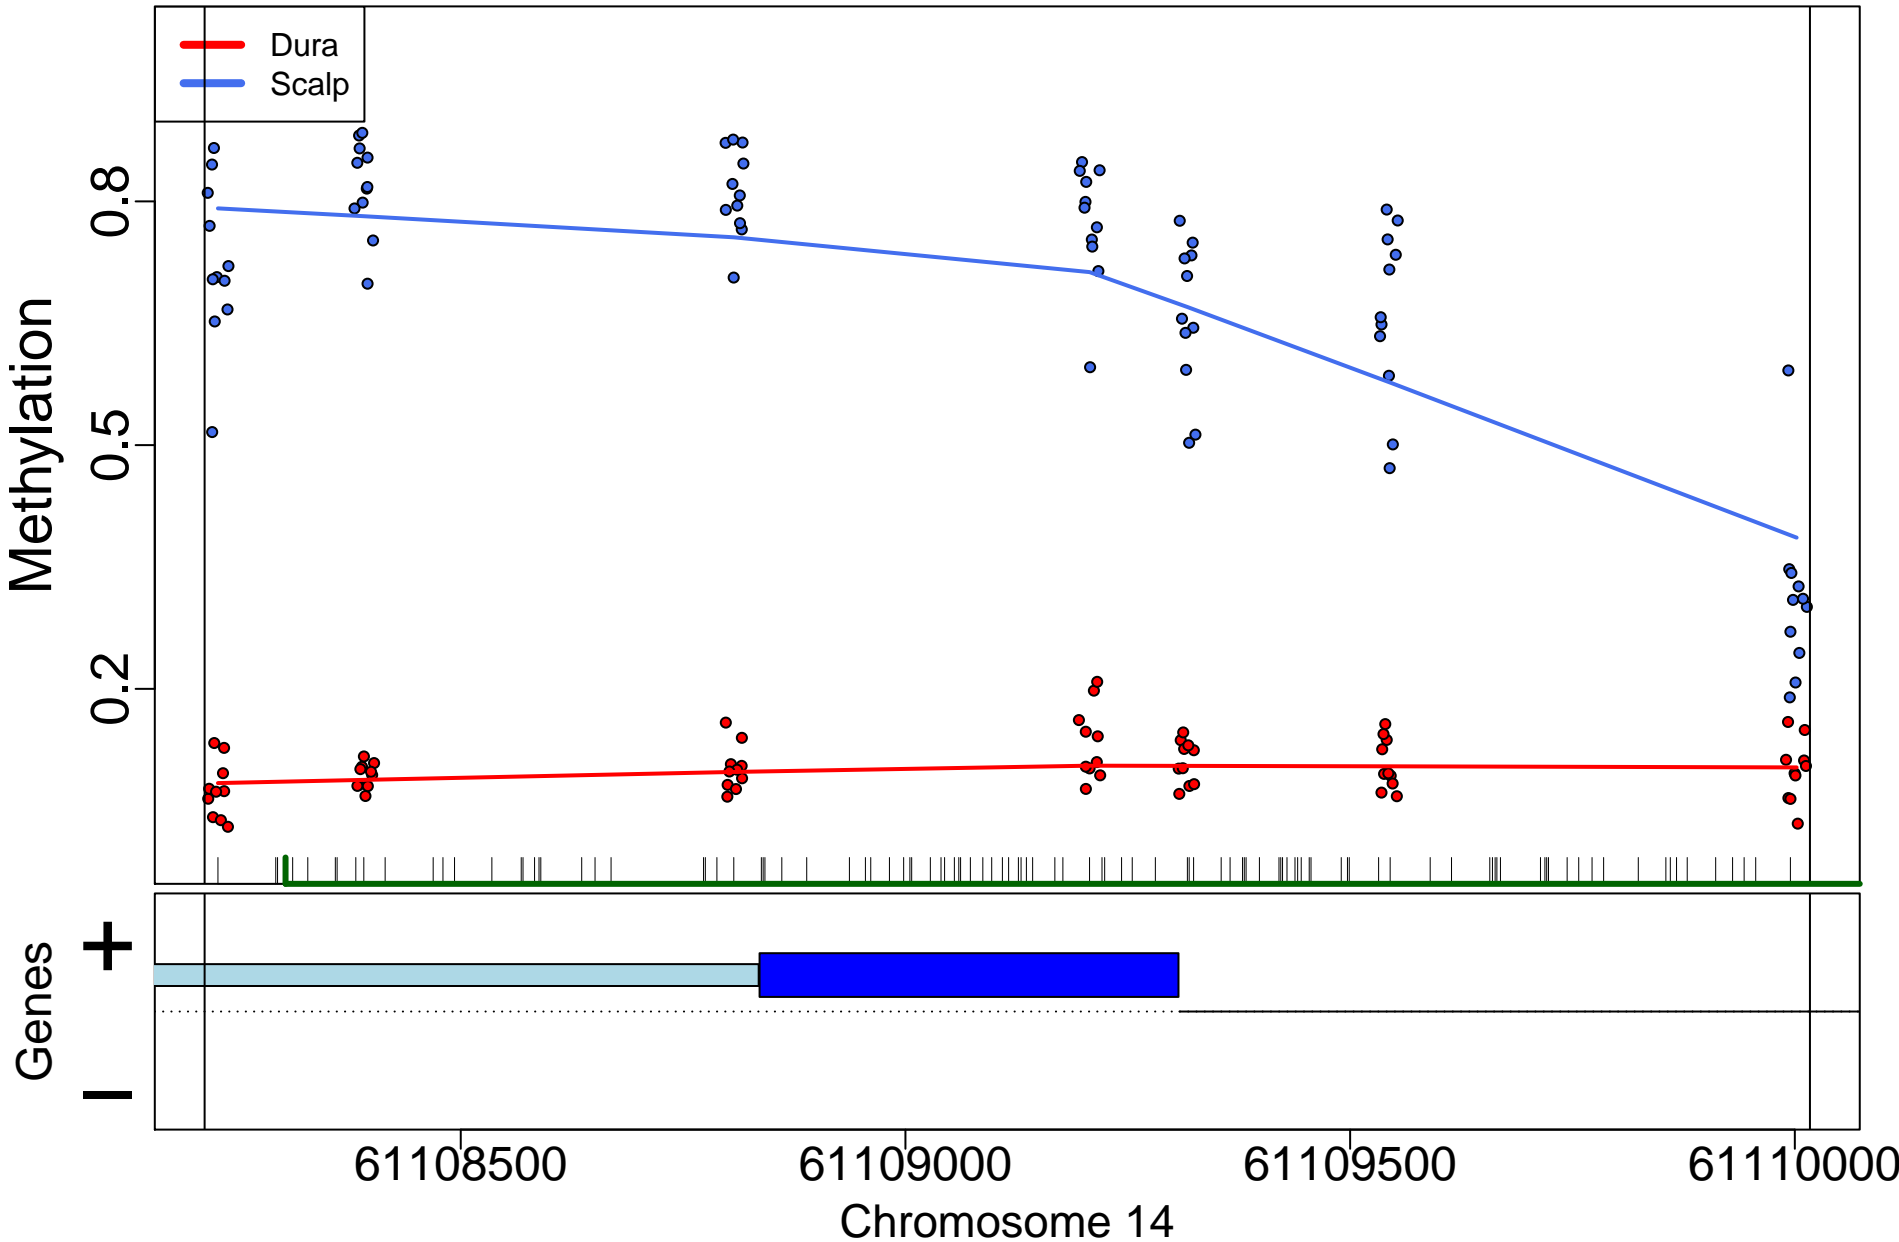

PITX2; 7776bp from tss:covers exon(s)

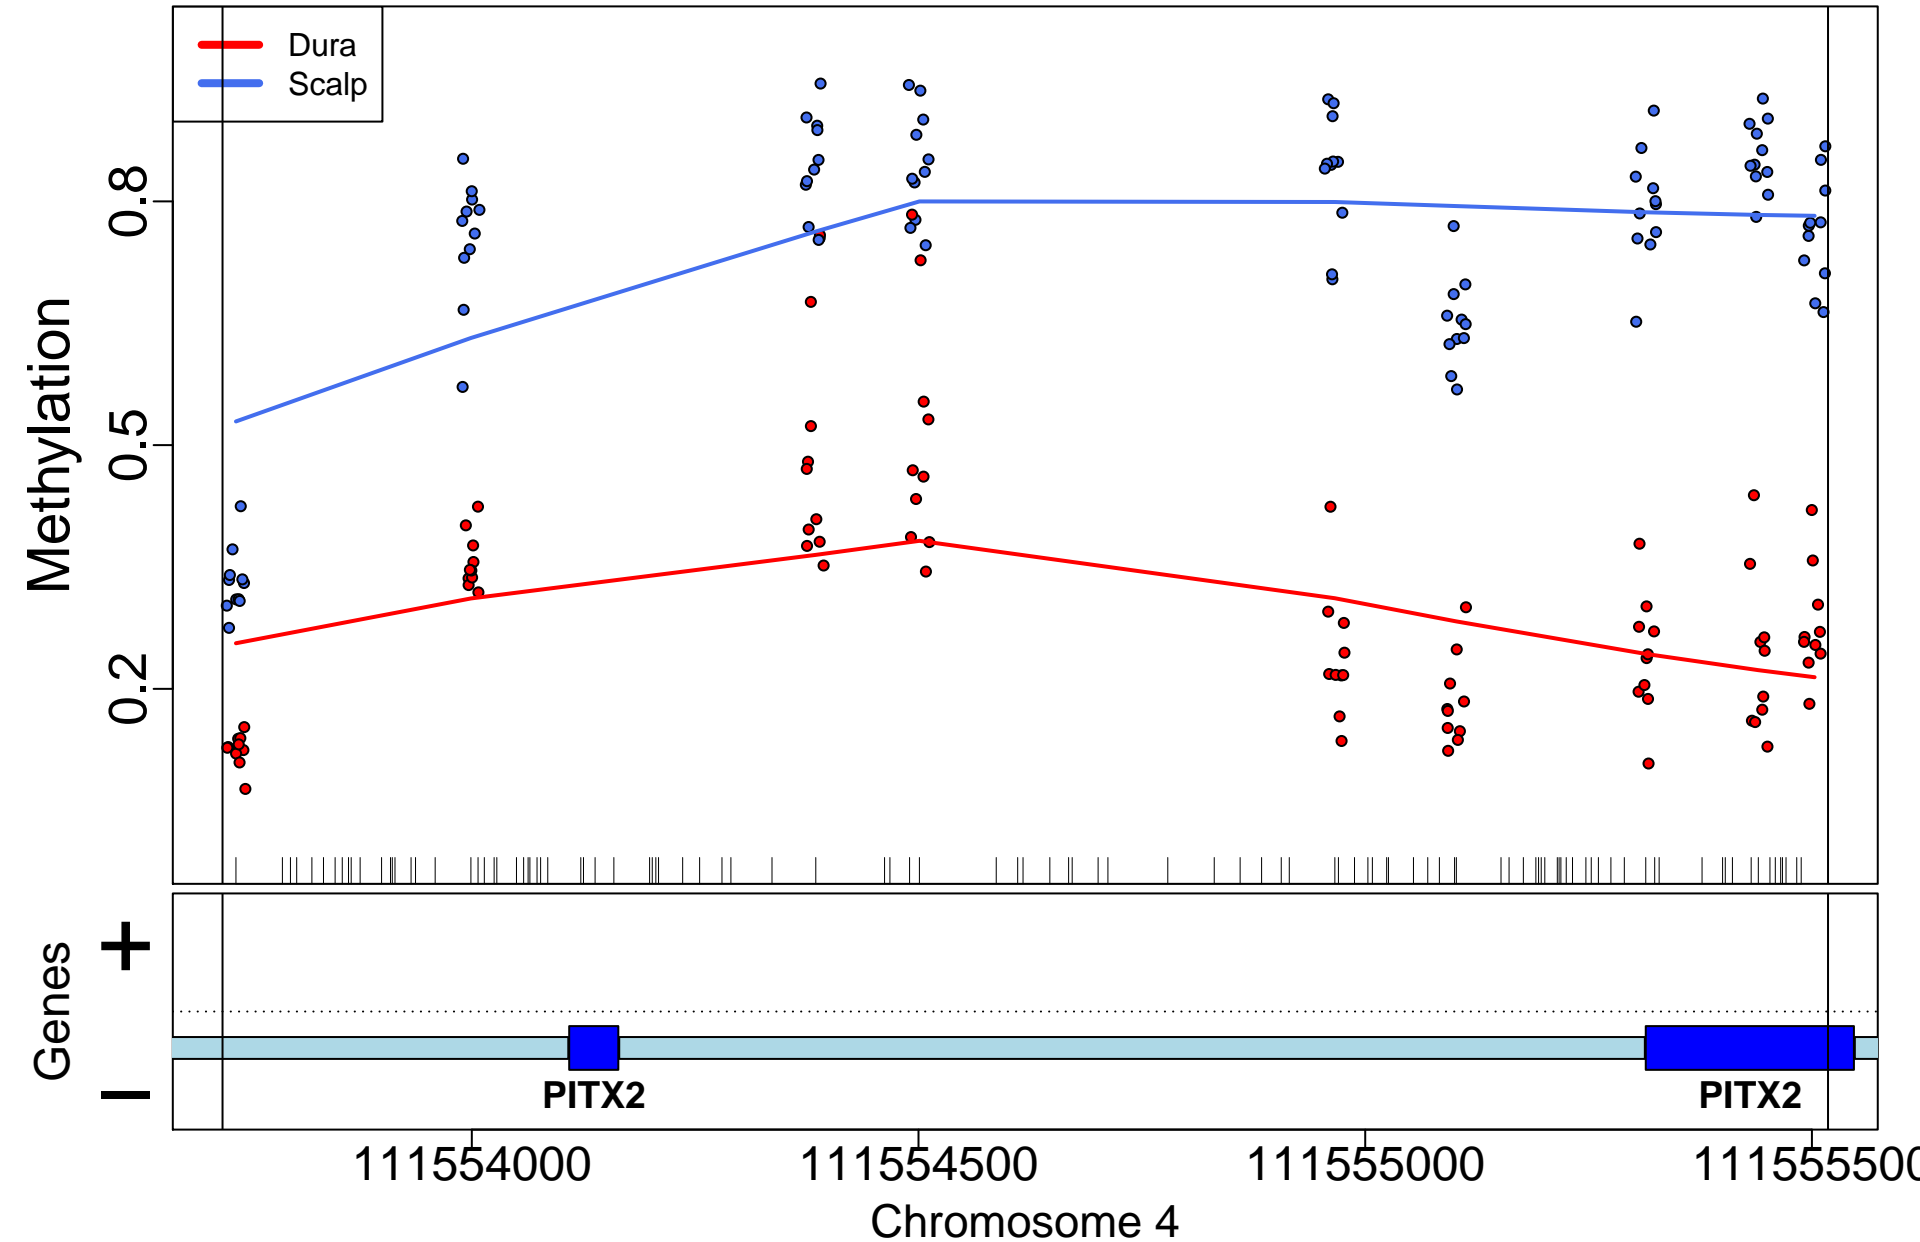

## EMX2OS; 0bp from tss:NA

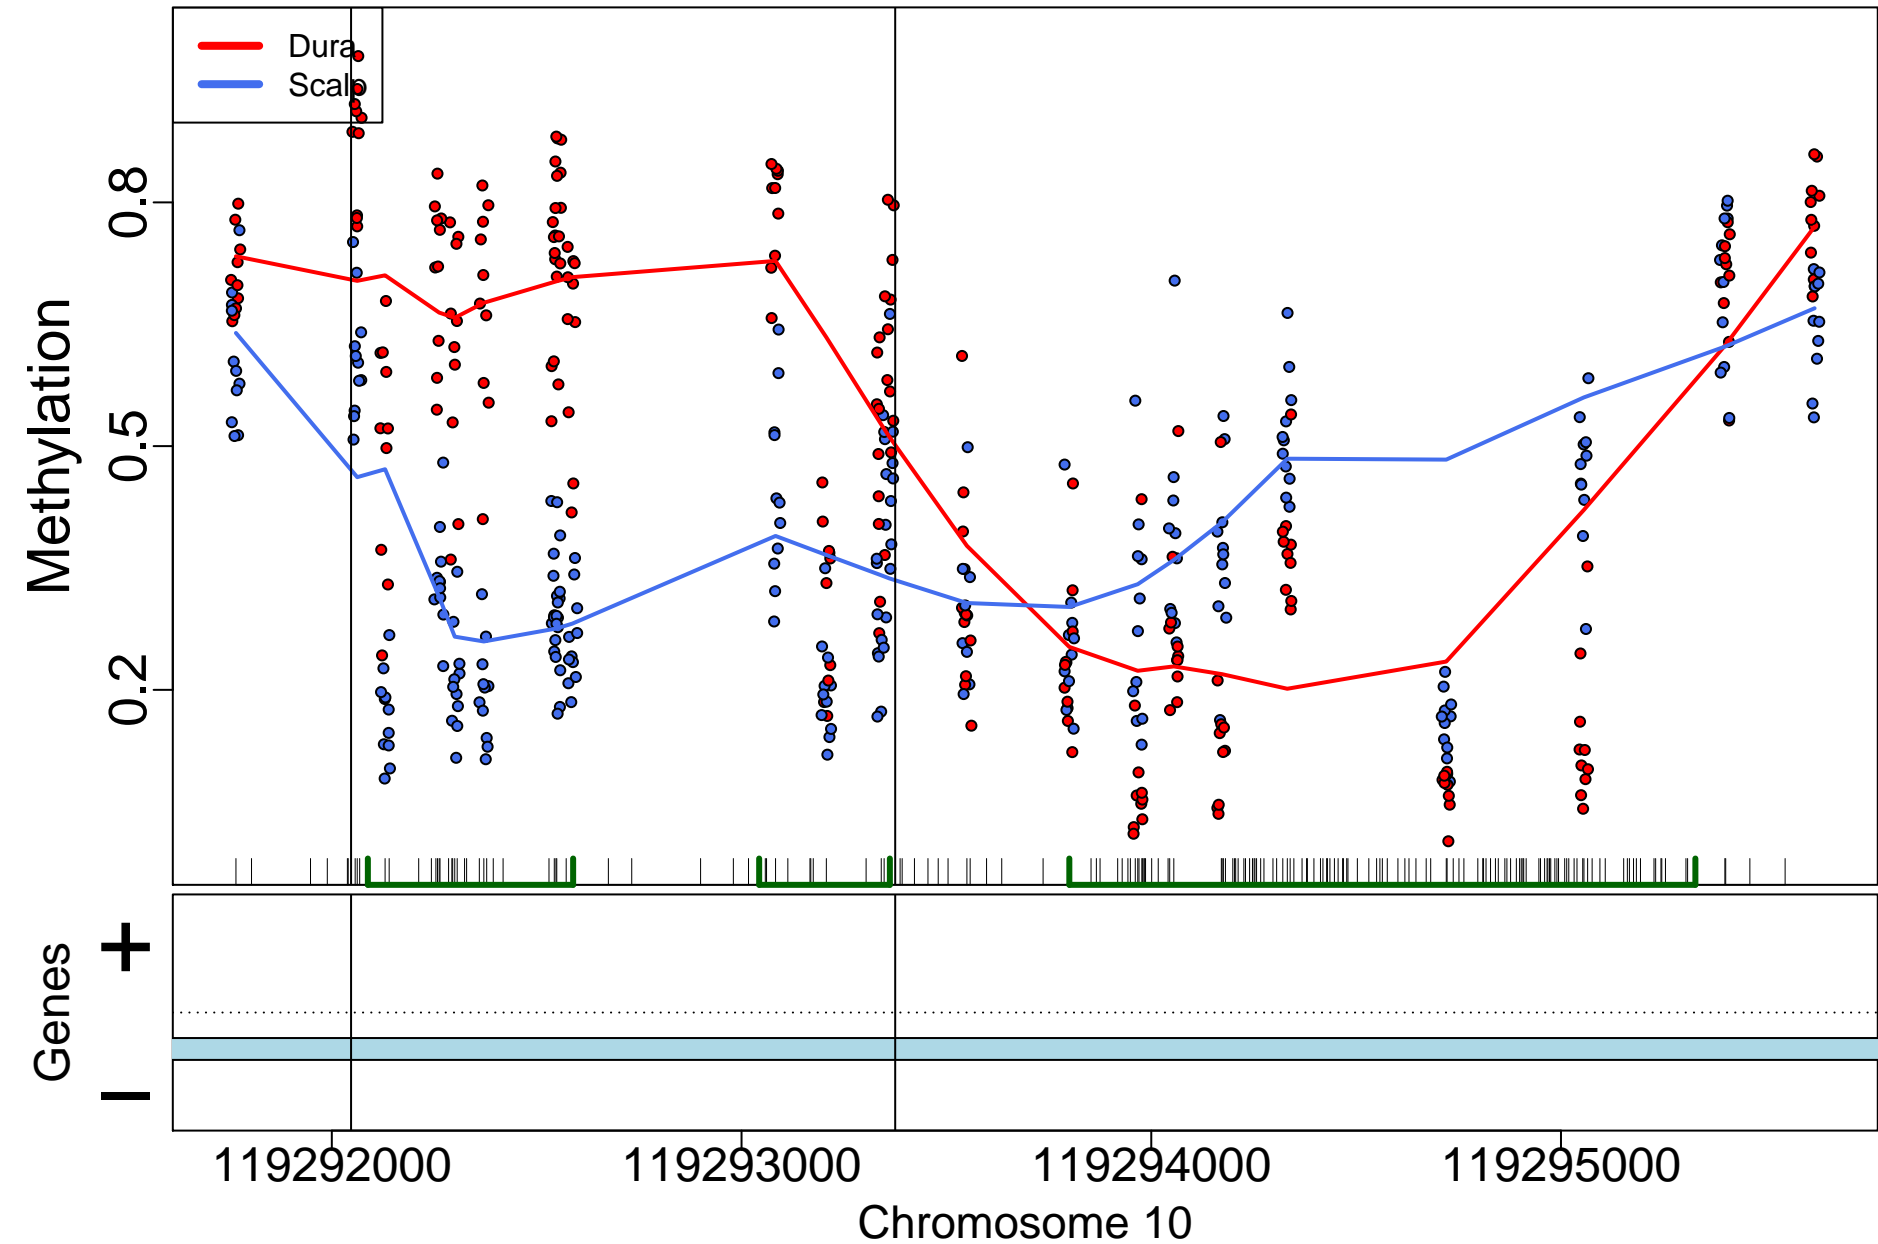

## NRN1; 0bp from tss:NA

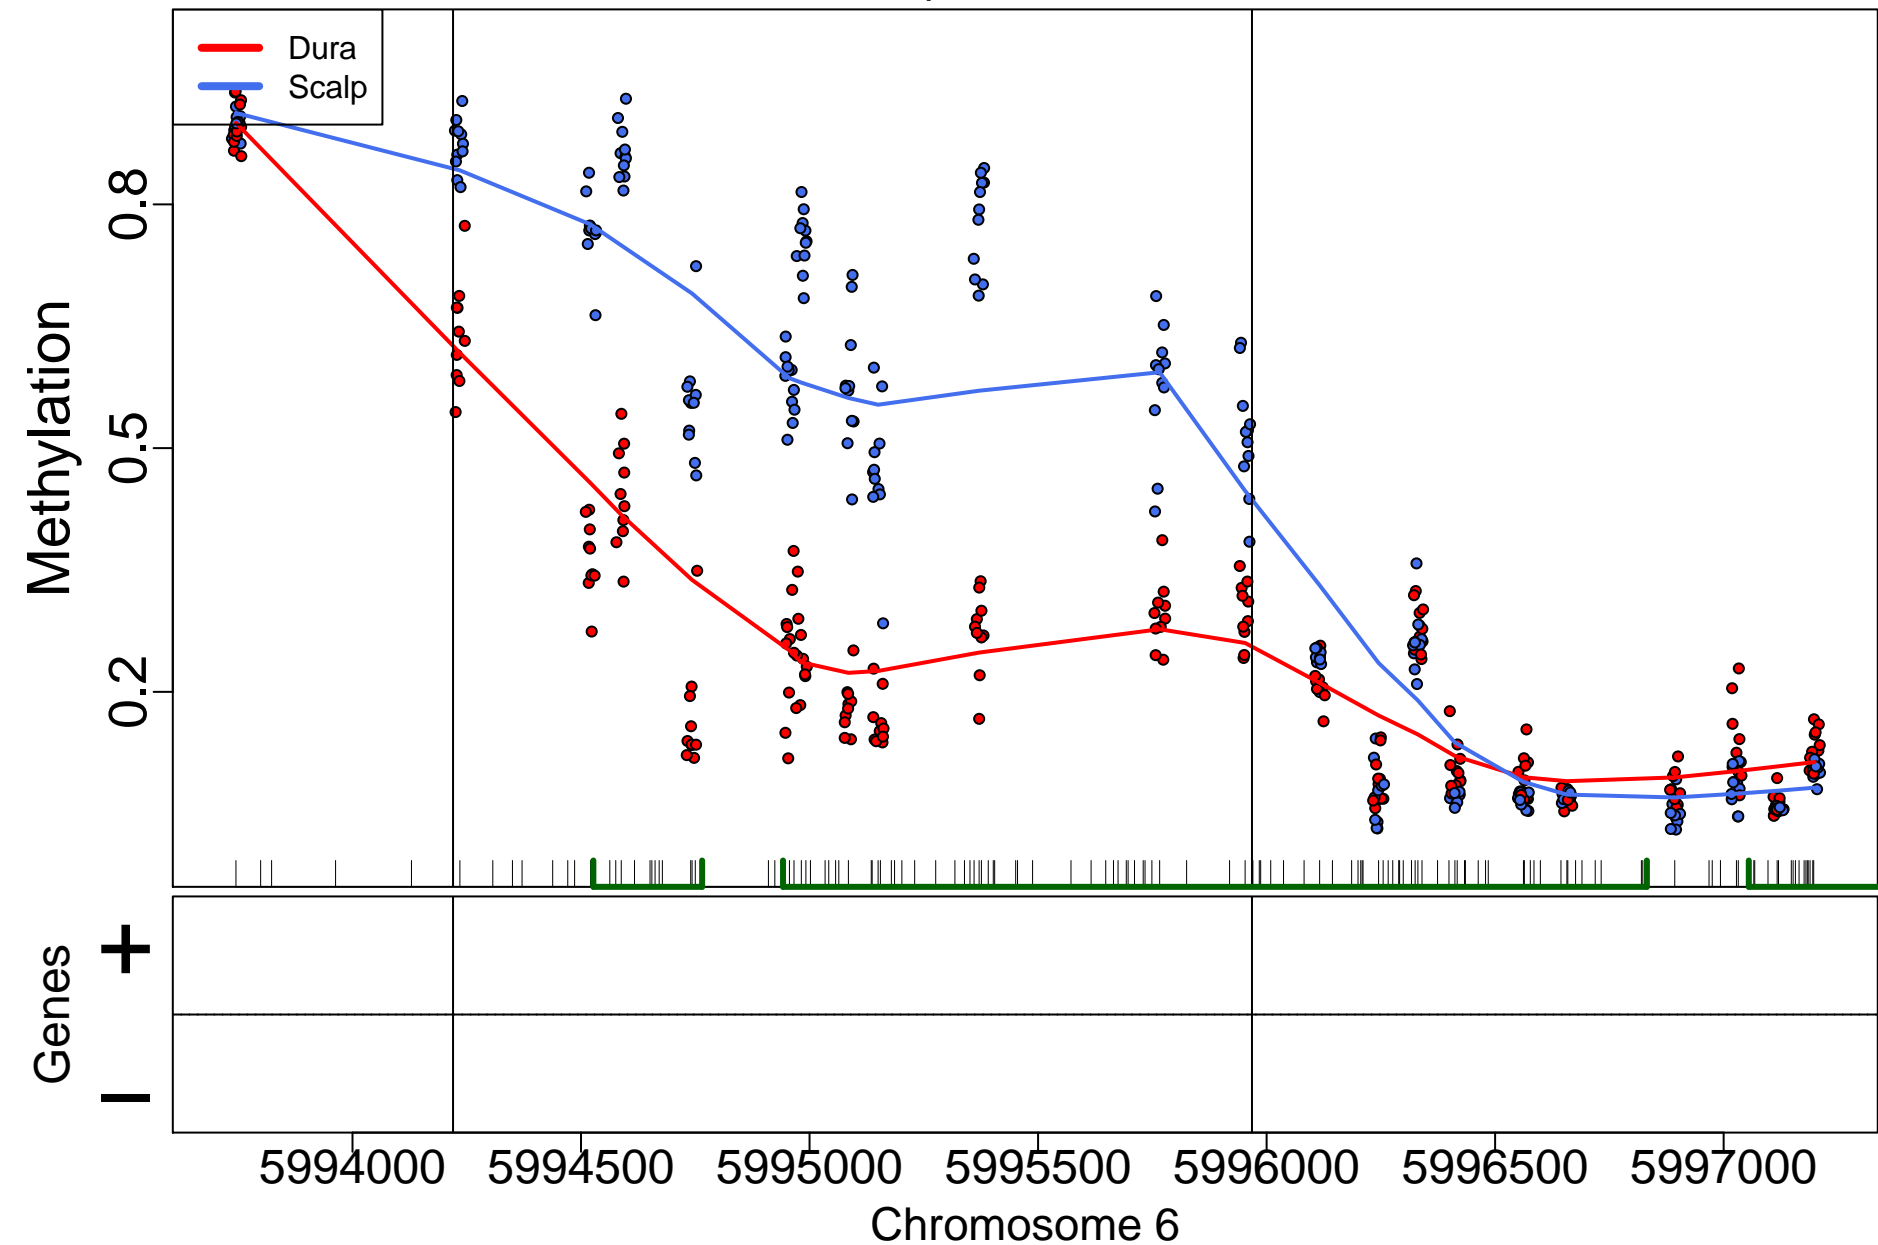

## SIM1; 4111bp from tss:upstream

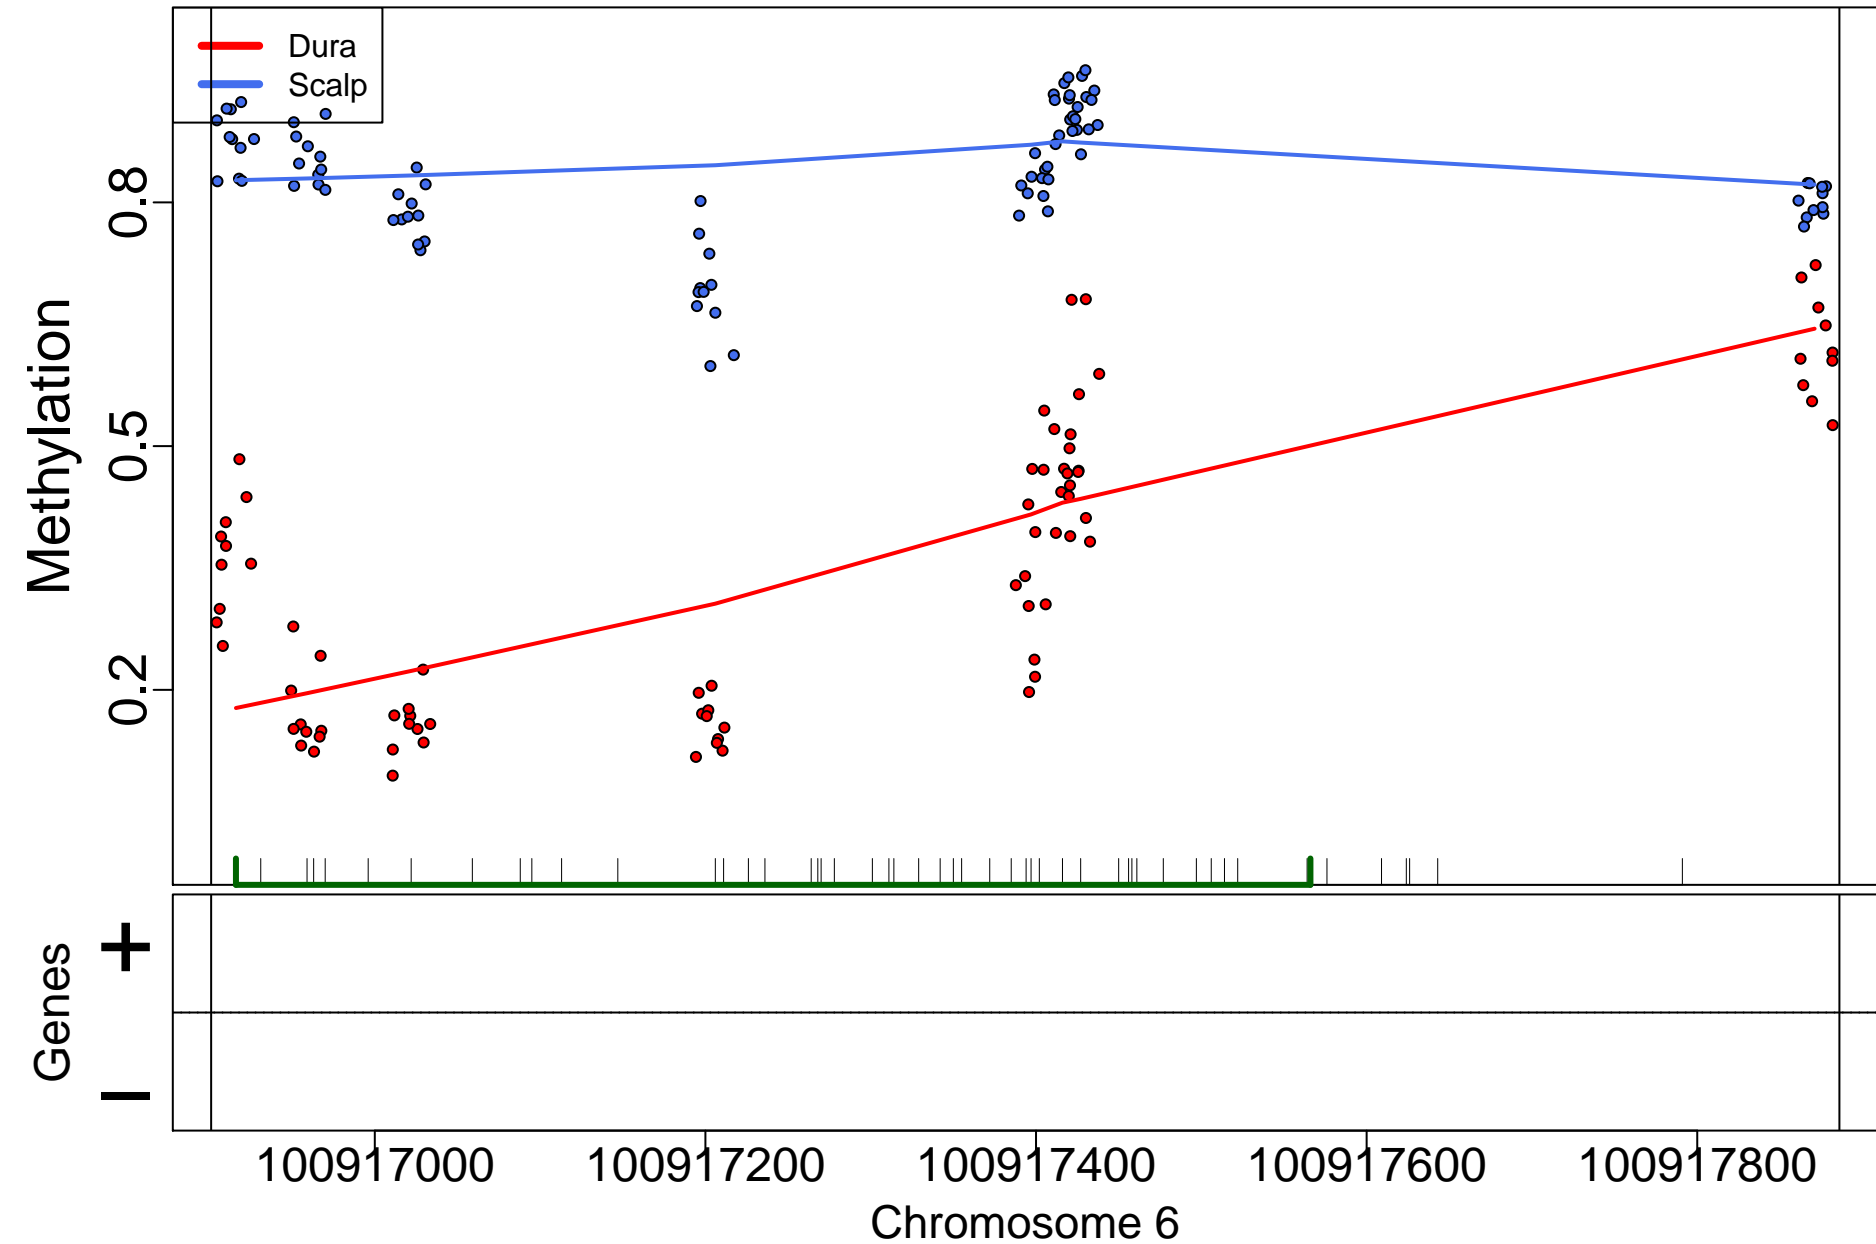

MEIS1; 147248bp from tss:downstream

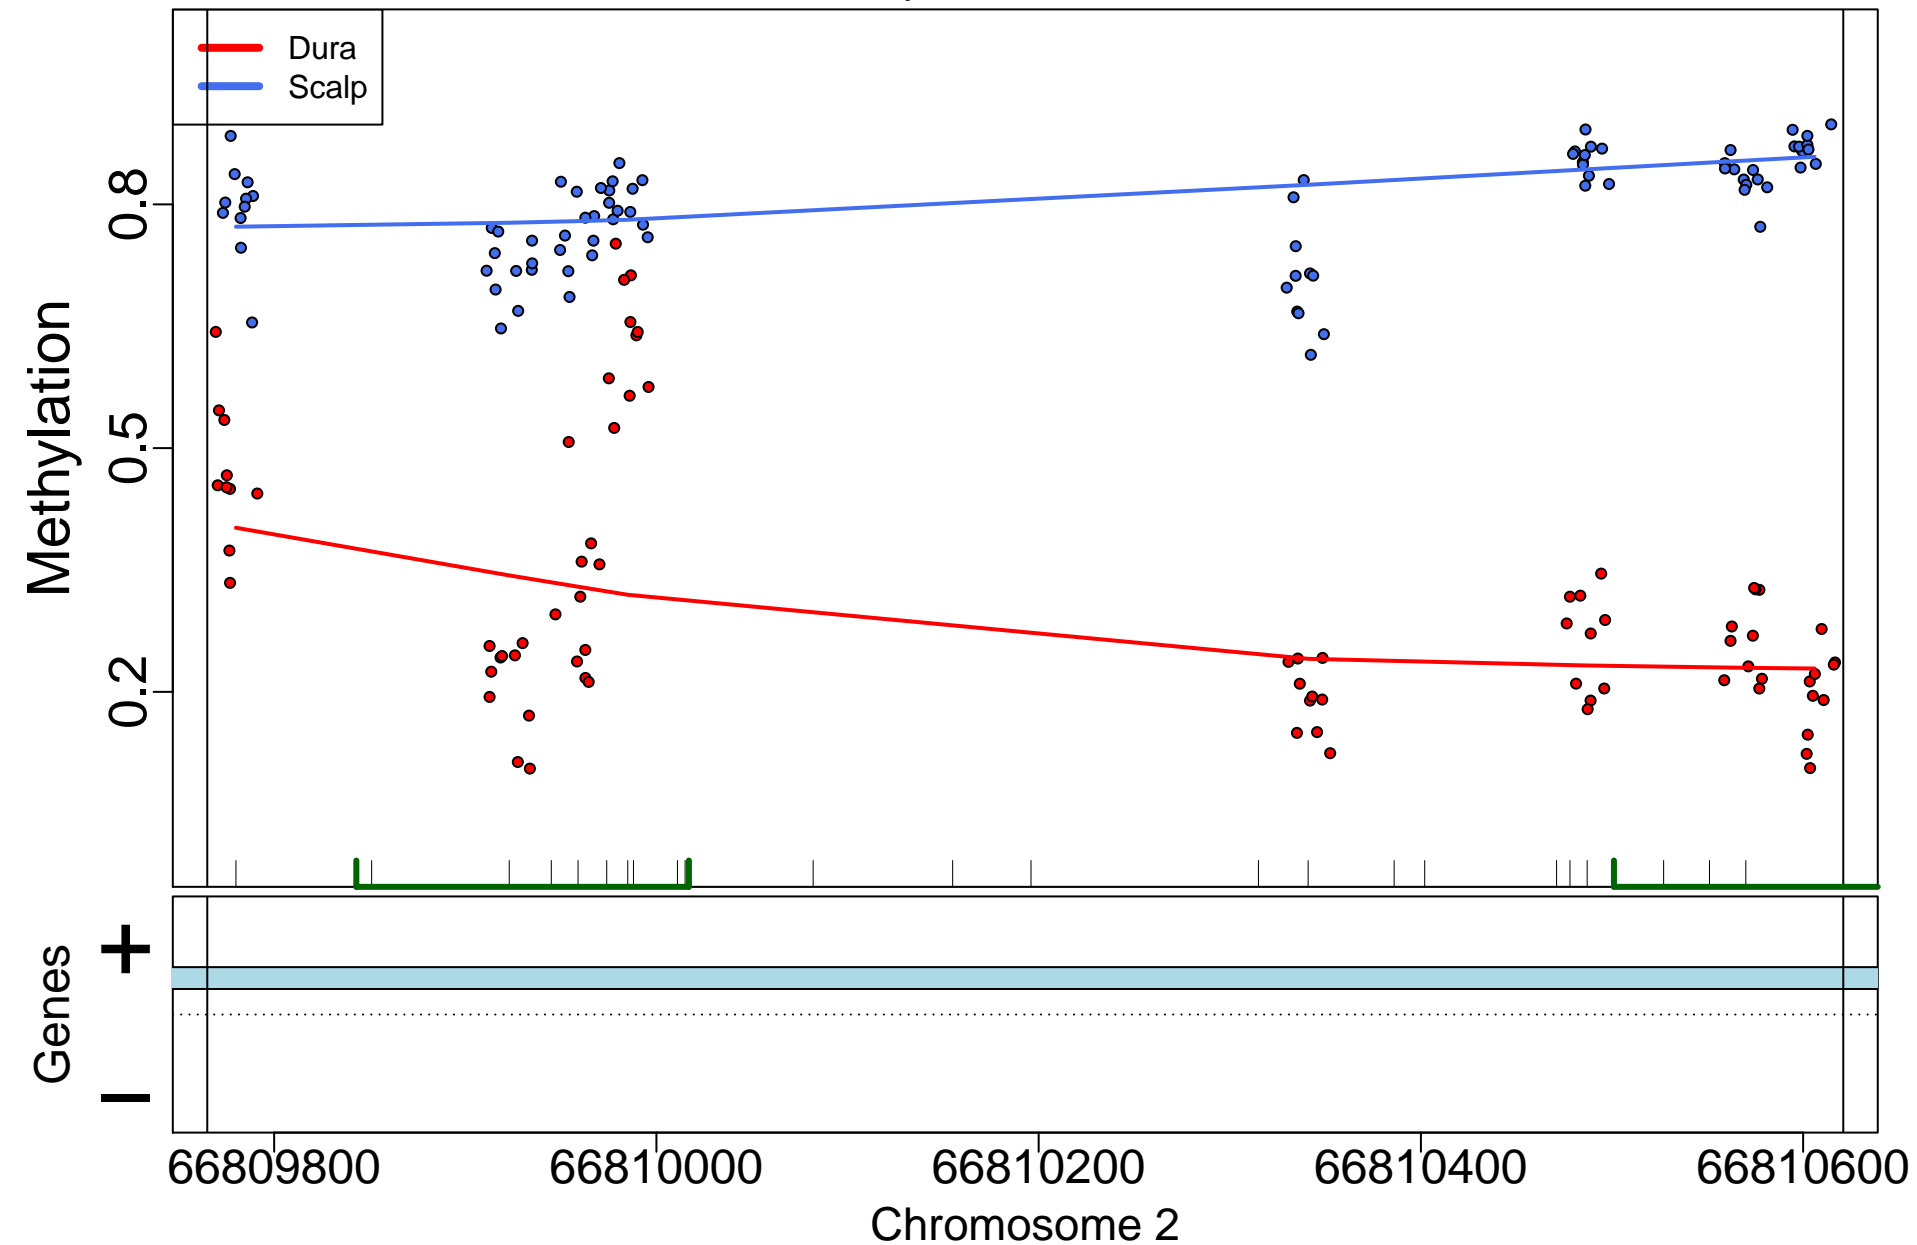



BLCAP; 6878bp from tss:inside intron

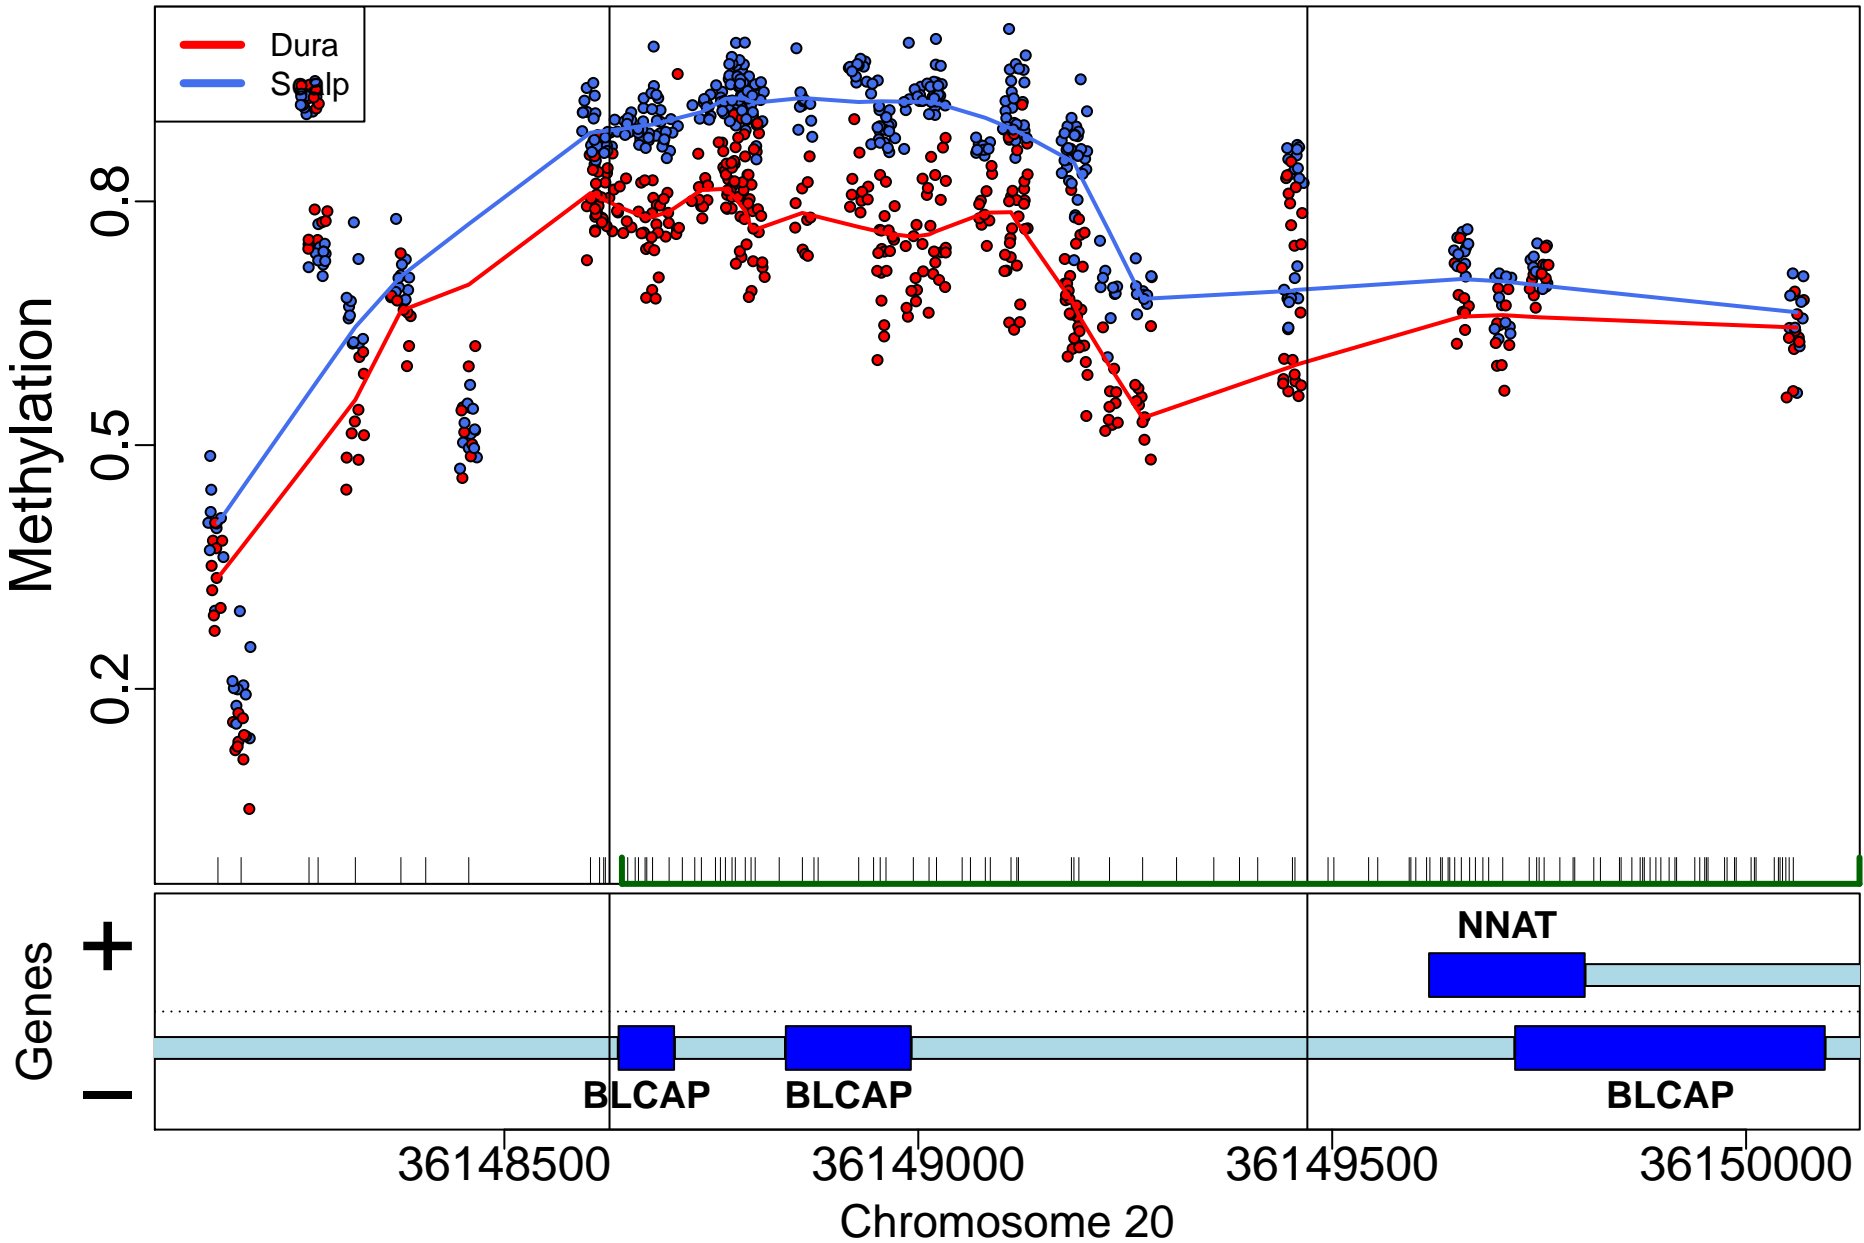

## HAND2; 20043bp from tss:downstream

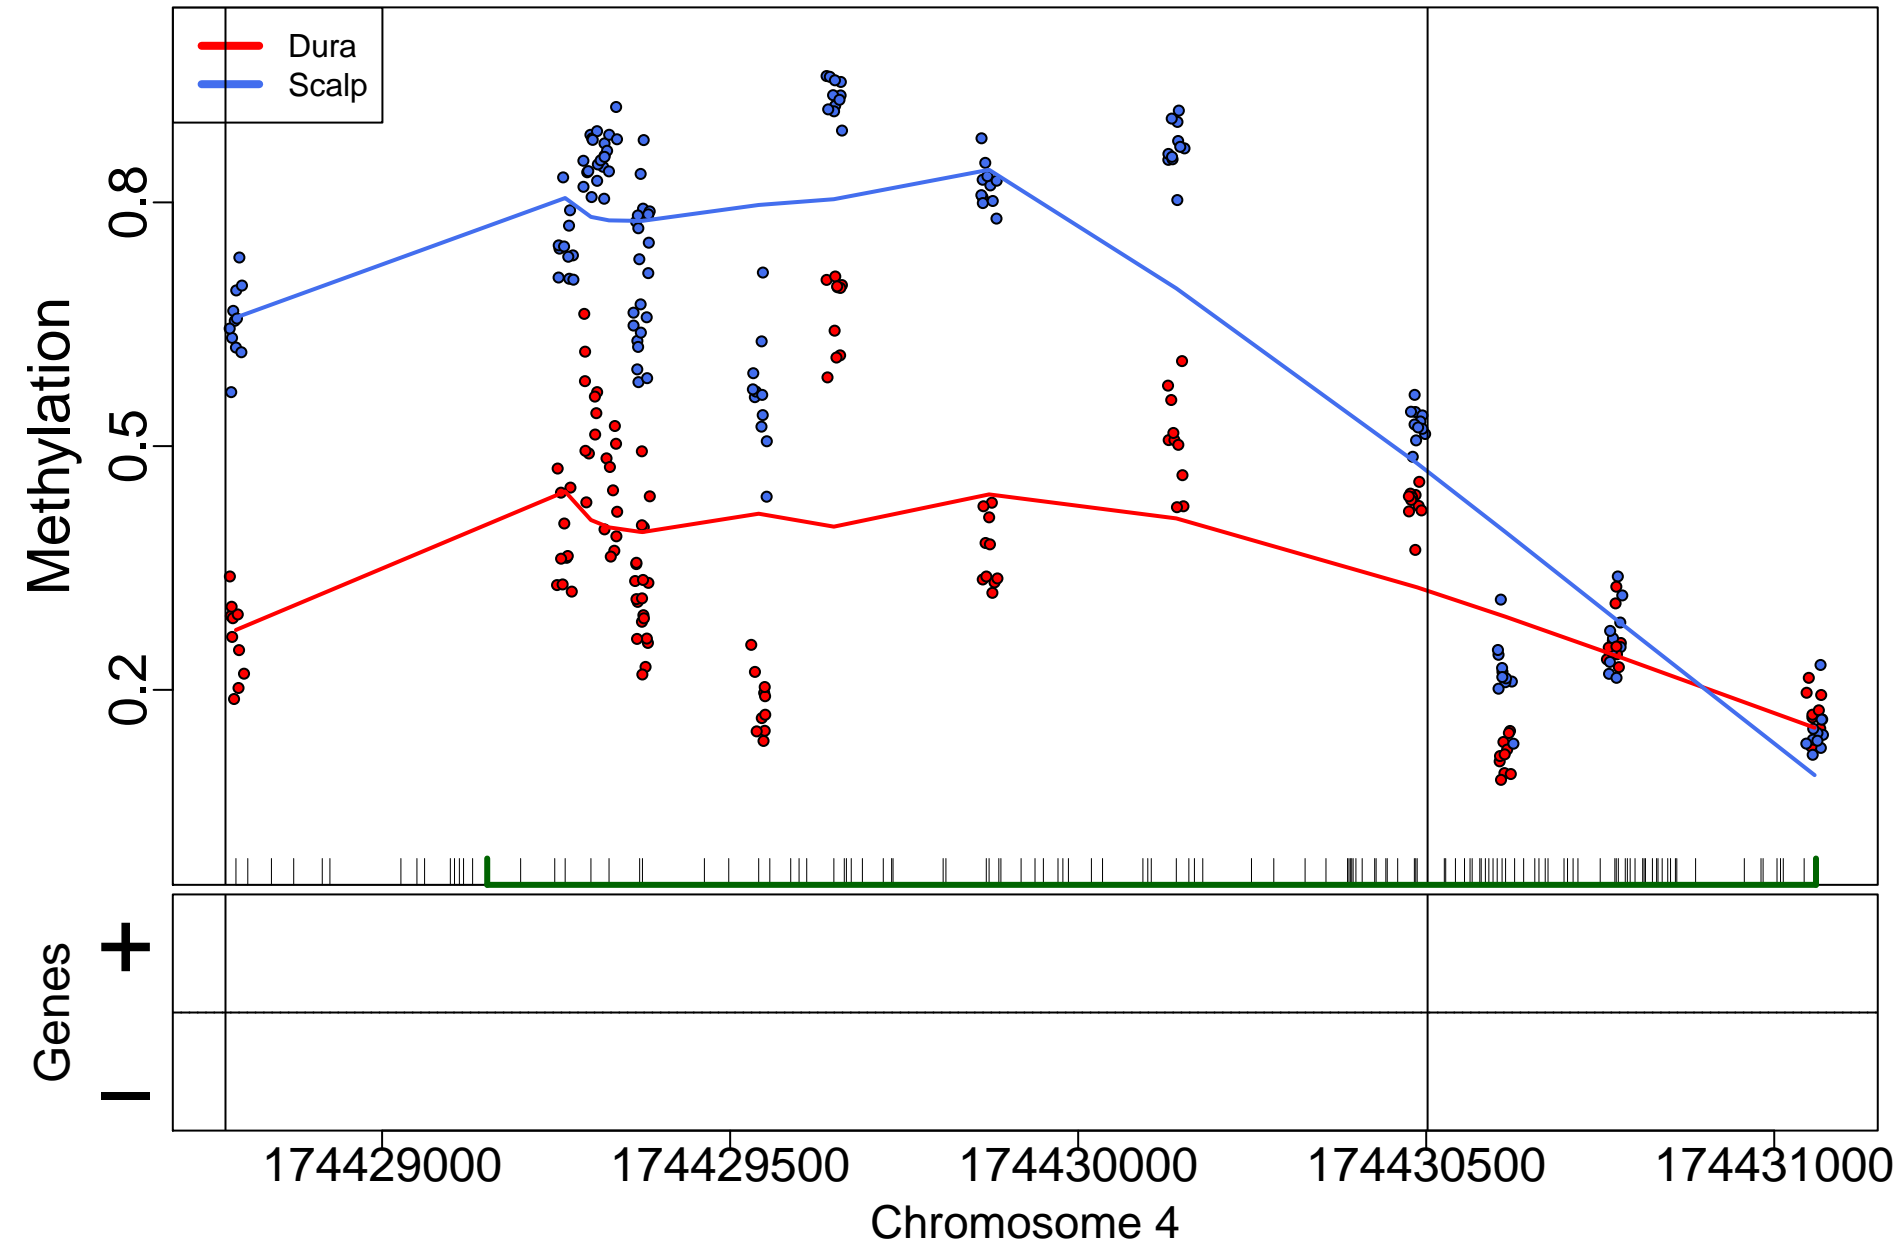

IRX1; 3450bp from tss:upstream

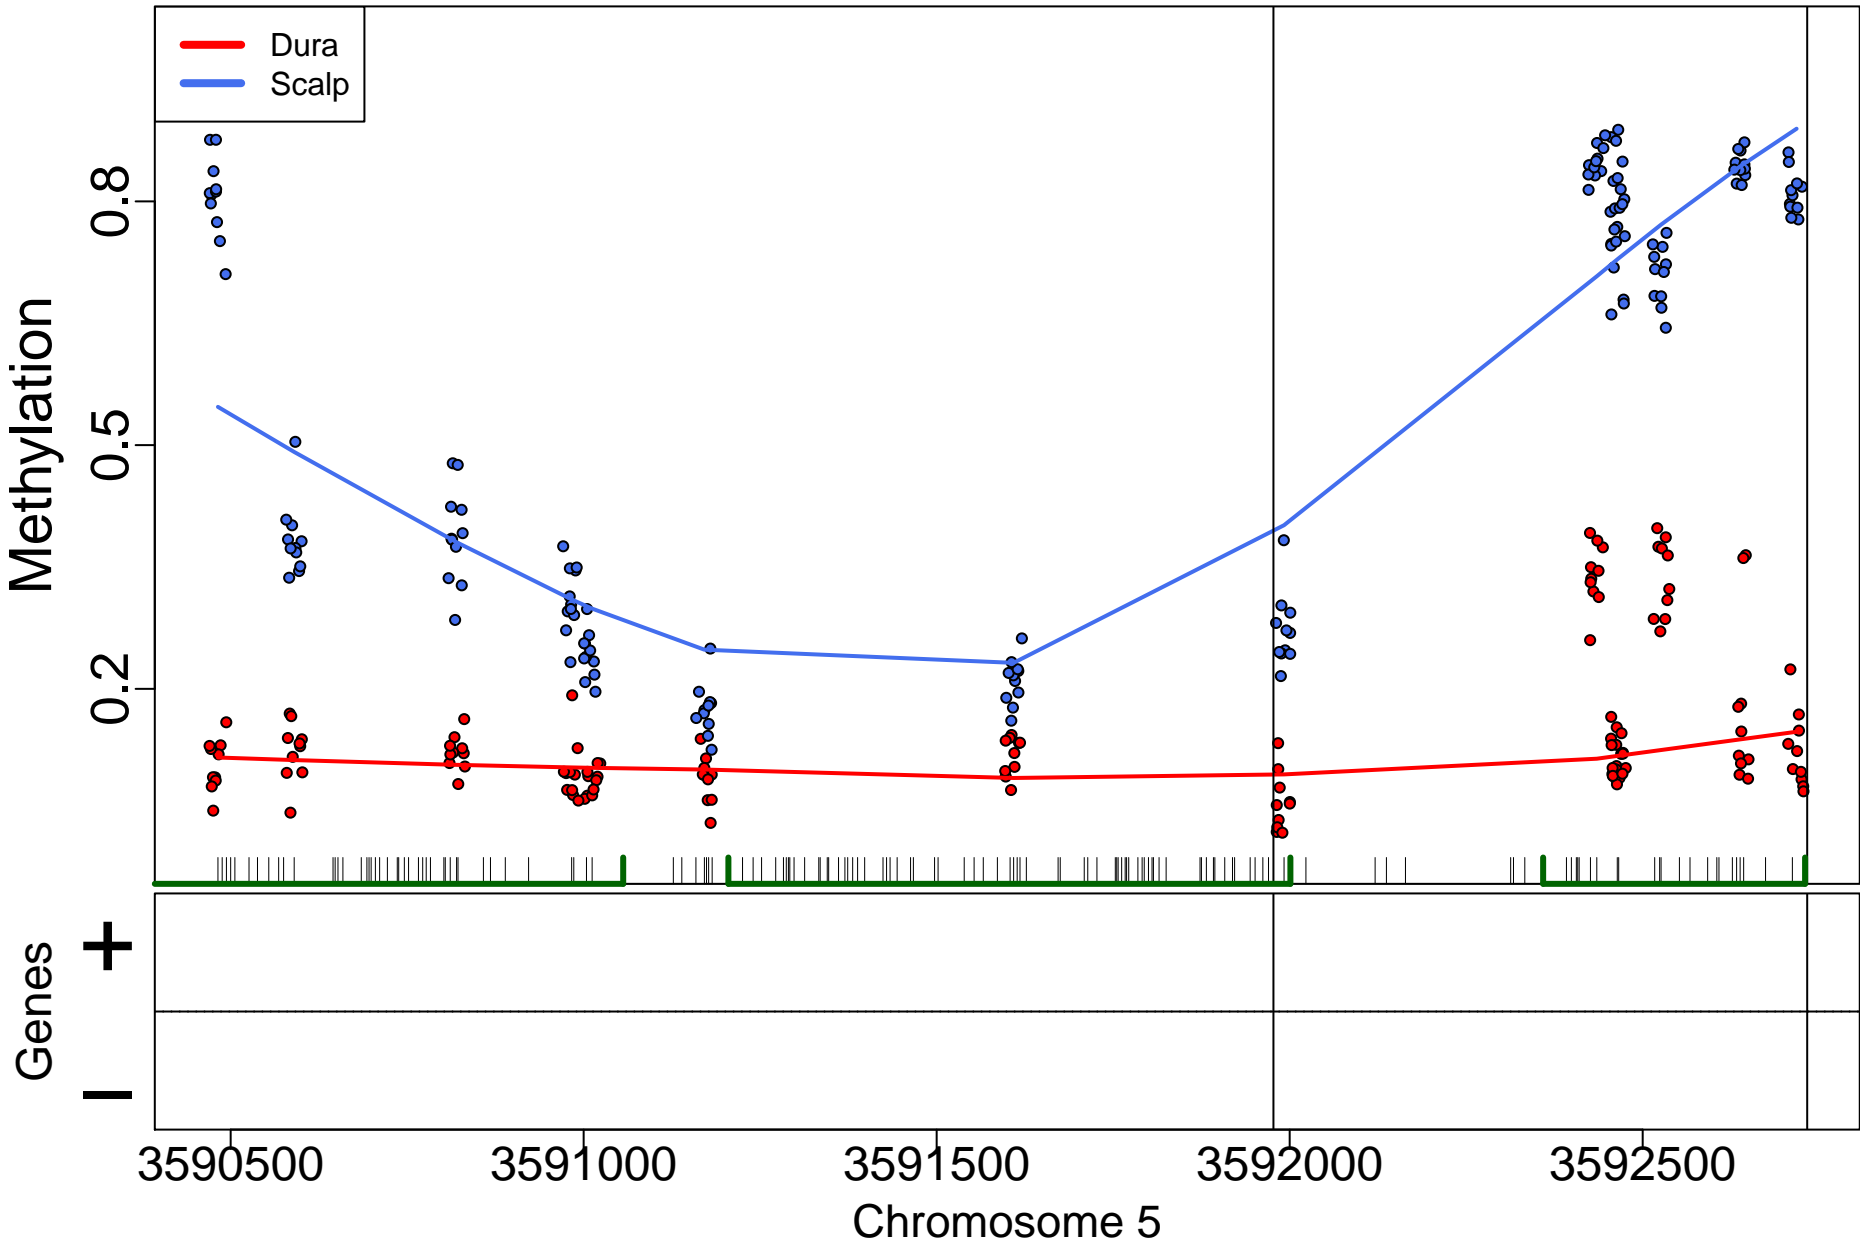

SP9; 472bp from tss:promoter

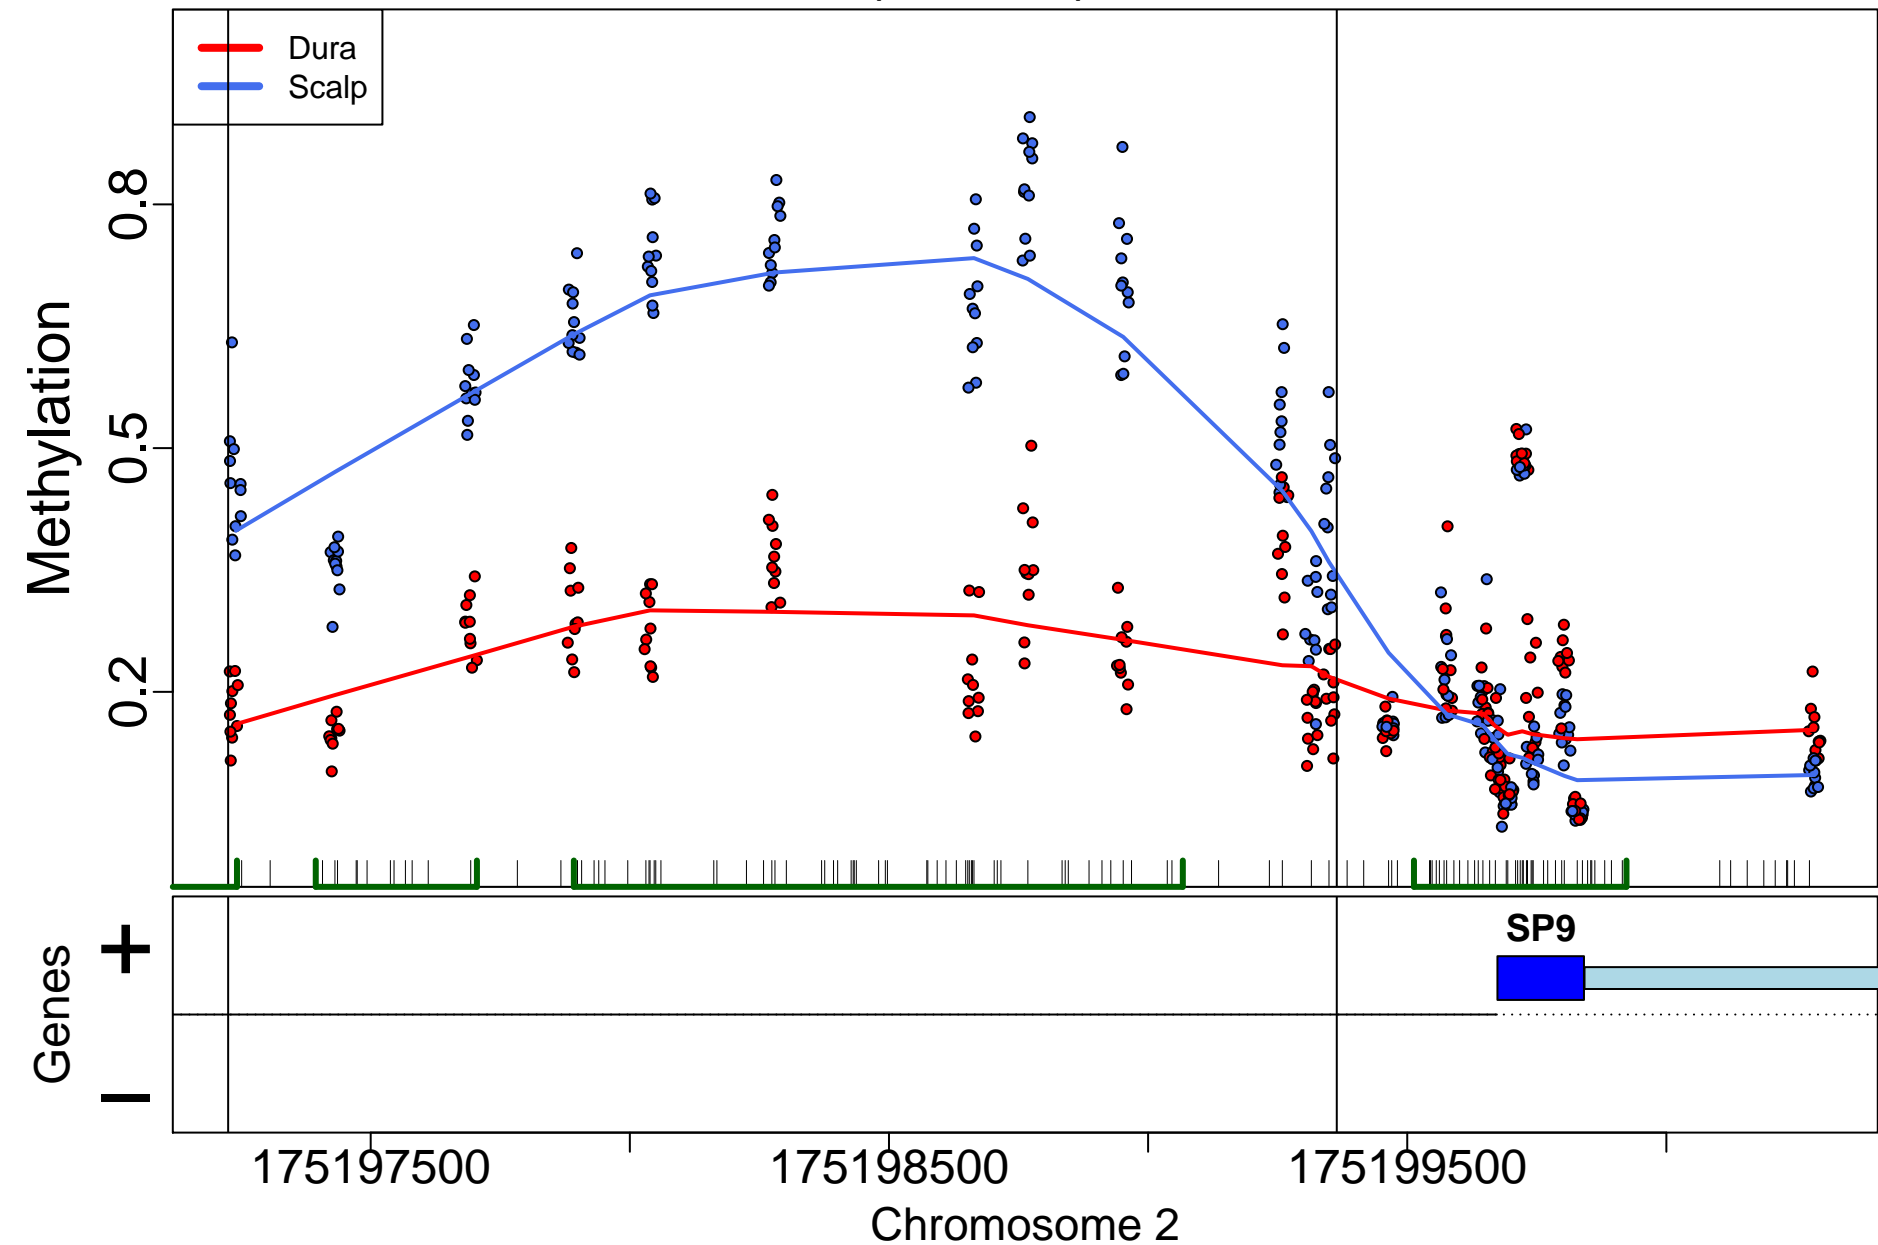

FIGN; 387170bp from tss:downstream

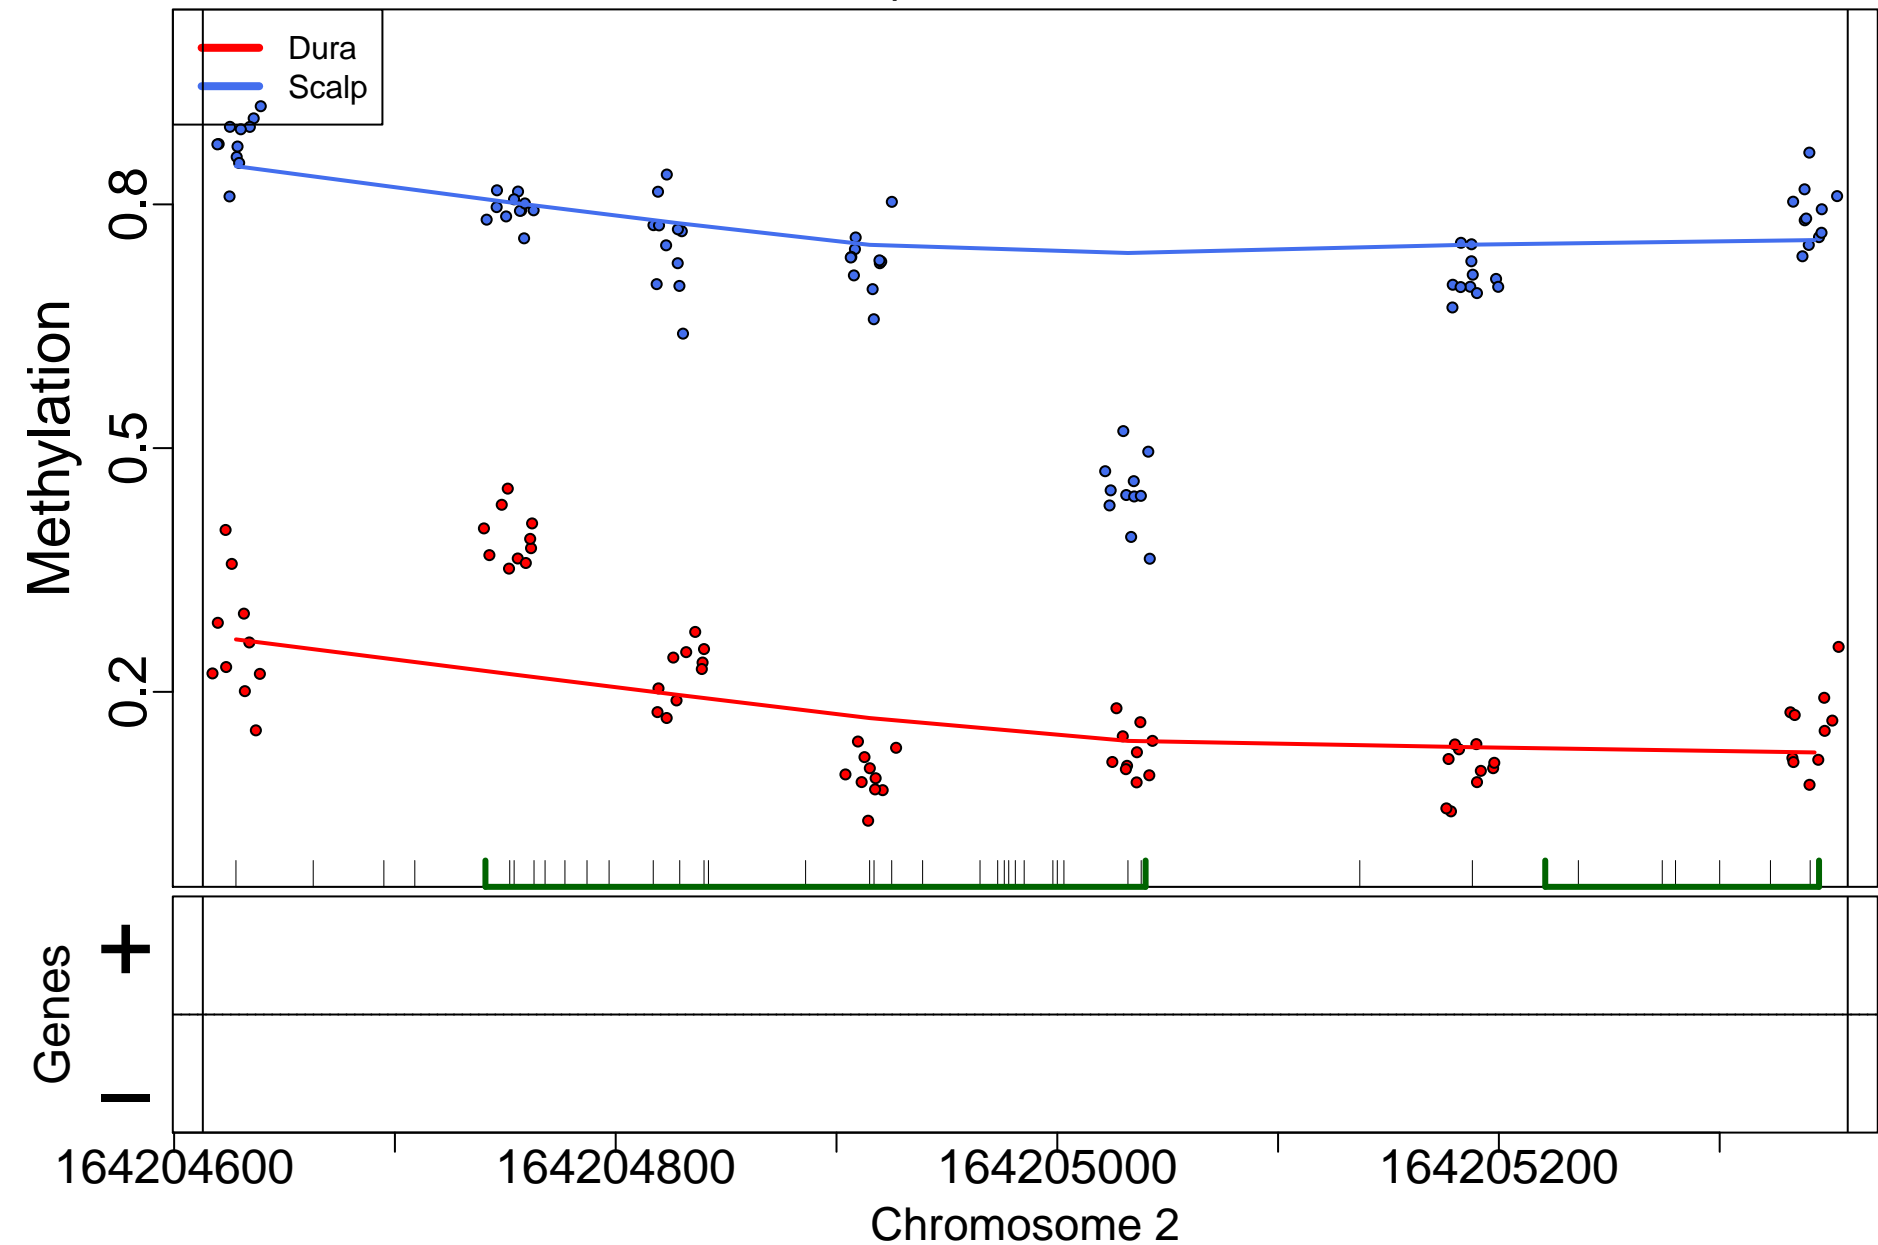

# HLX; 15153bp from tss:downstream

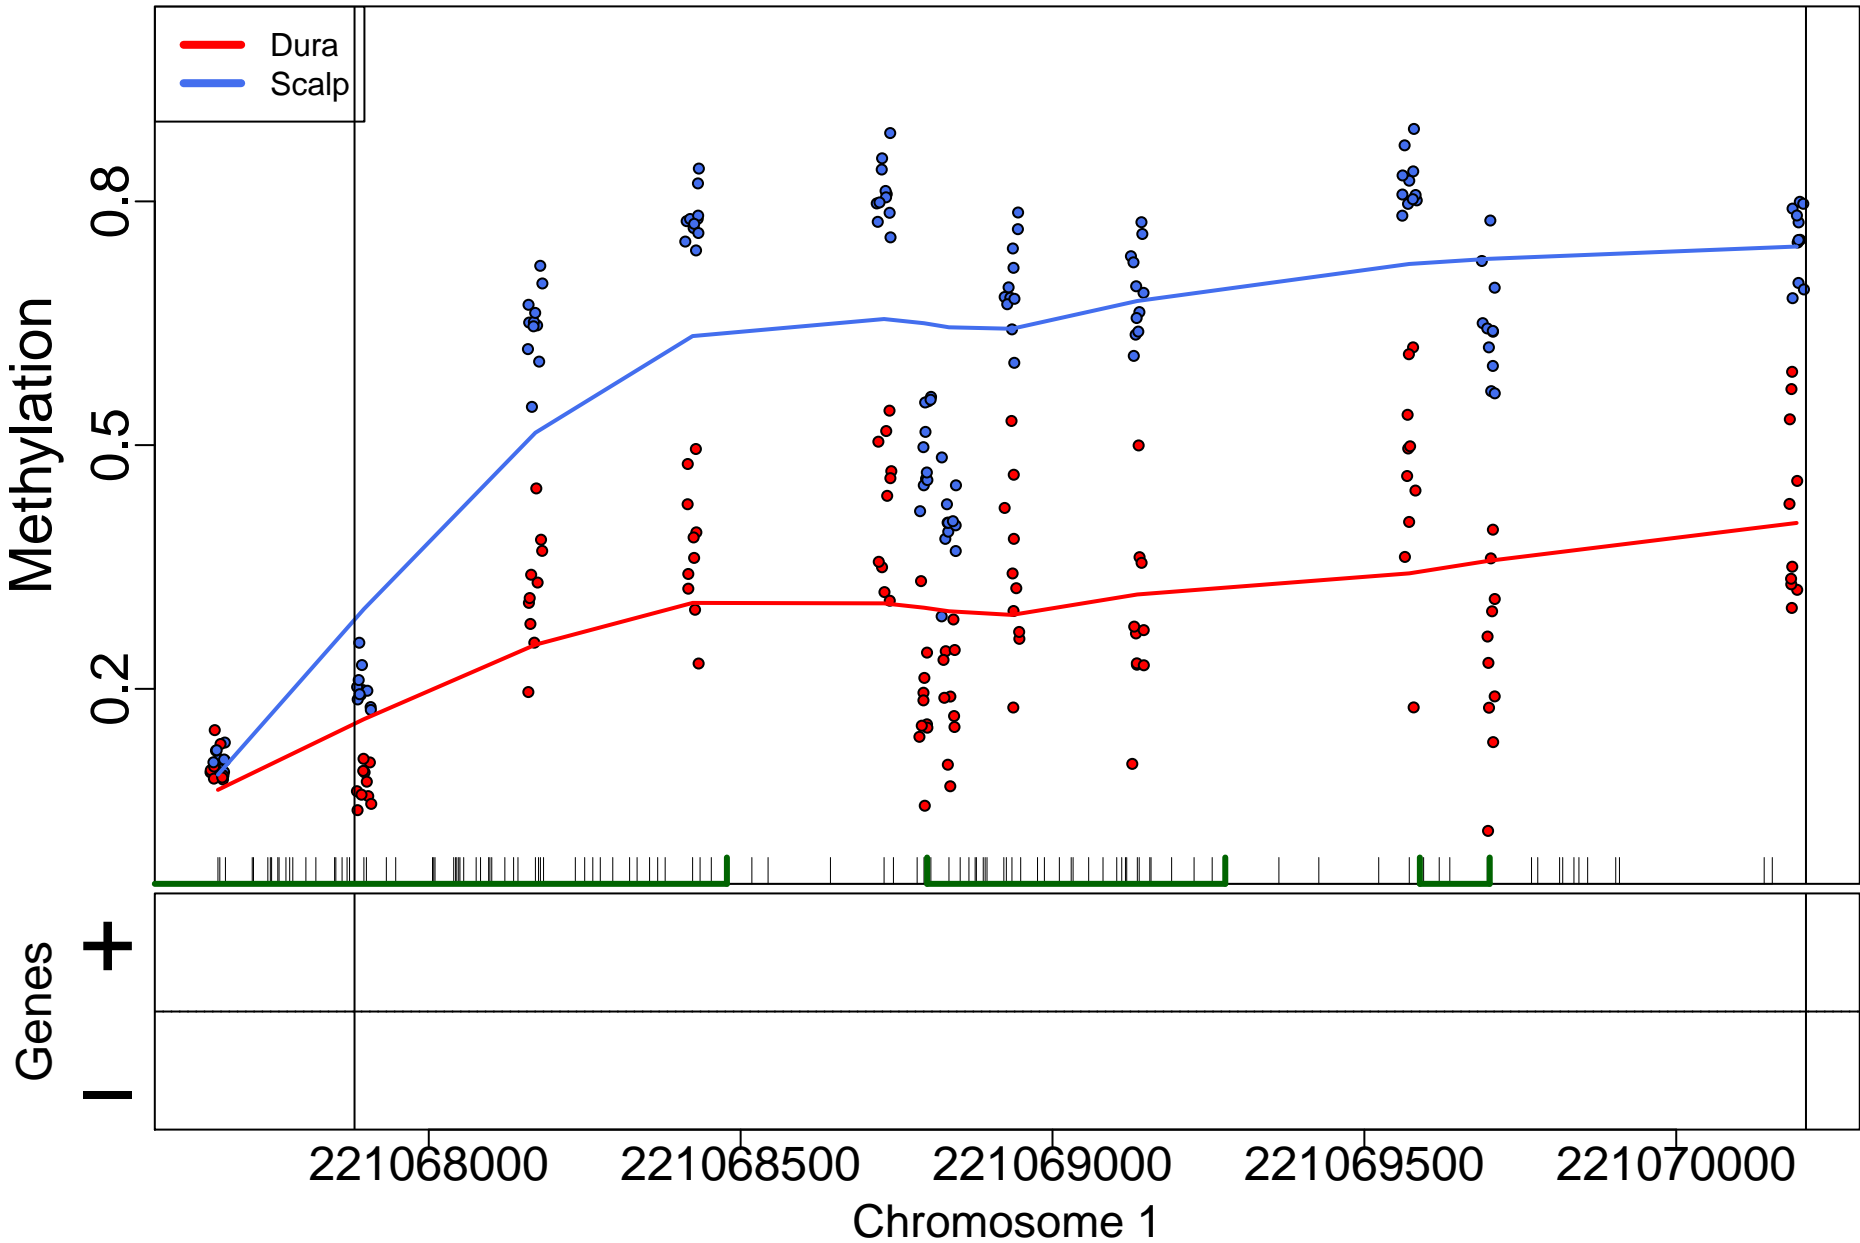

## SFRP2; 733bp from tss:promoter

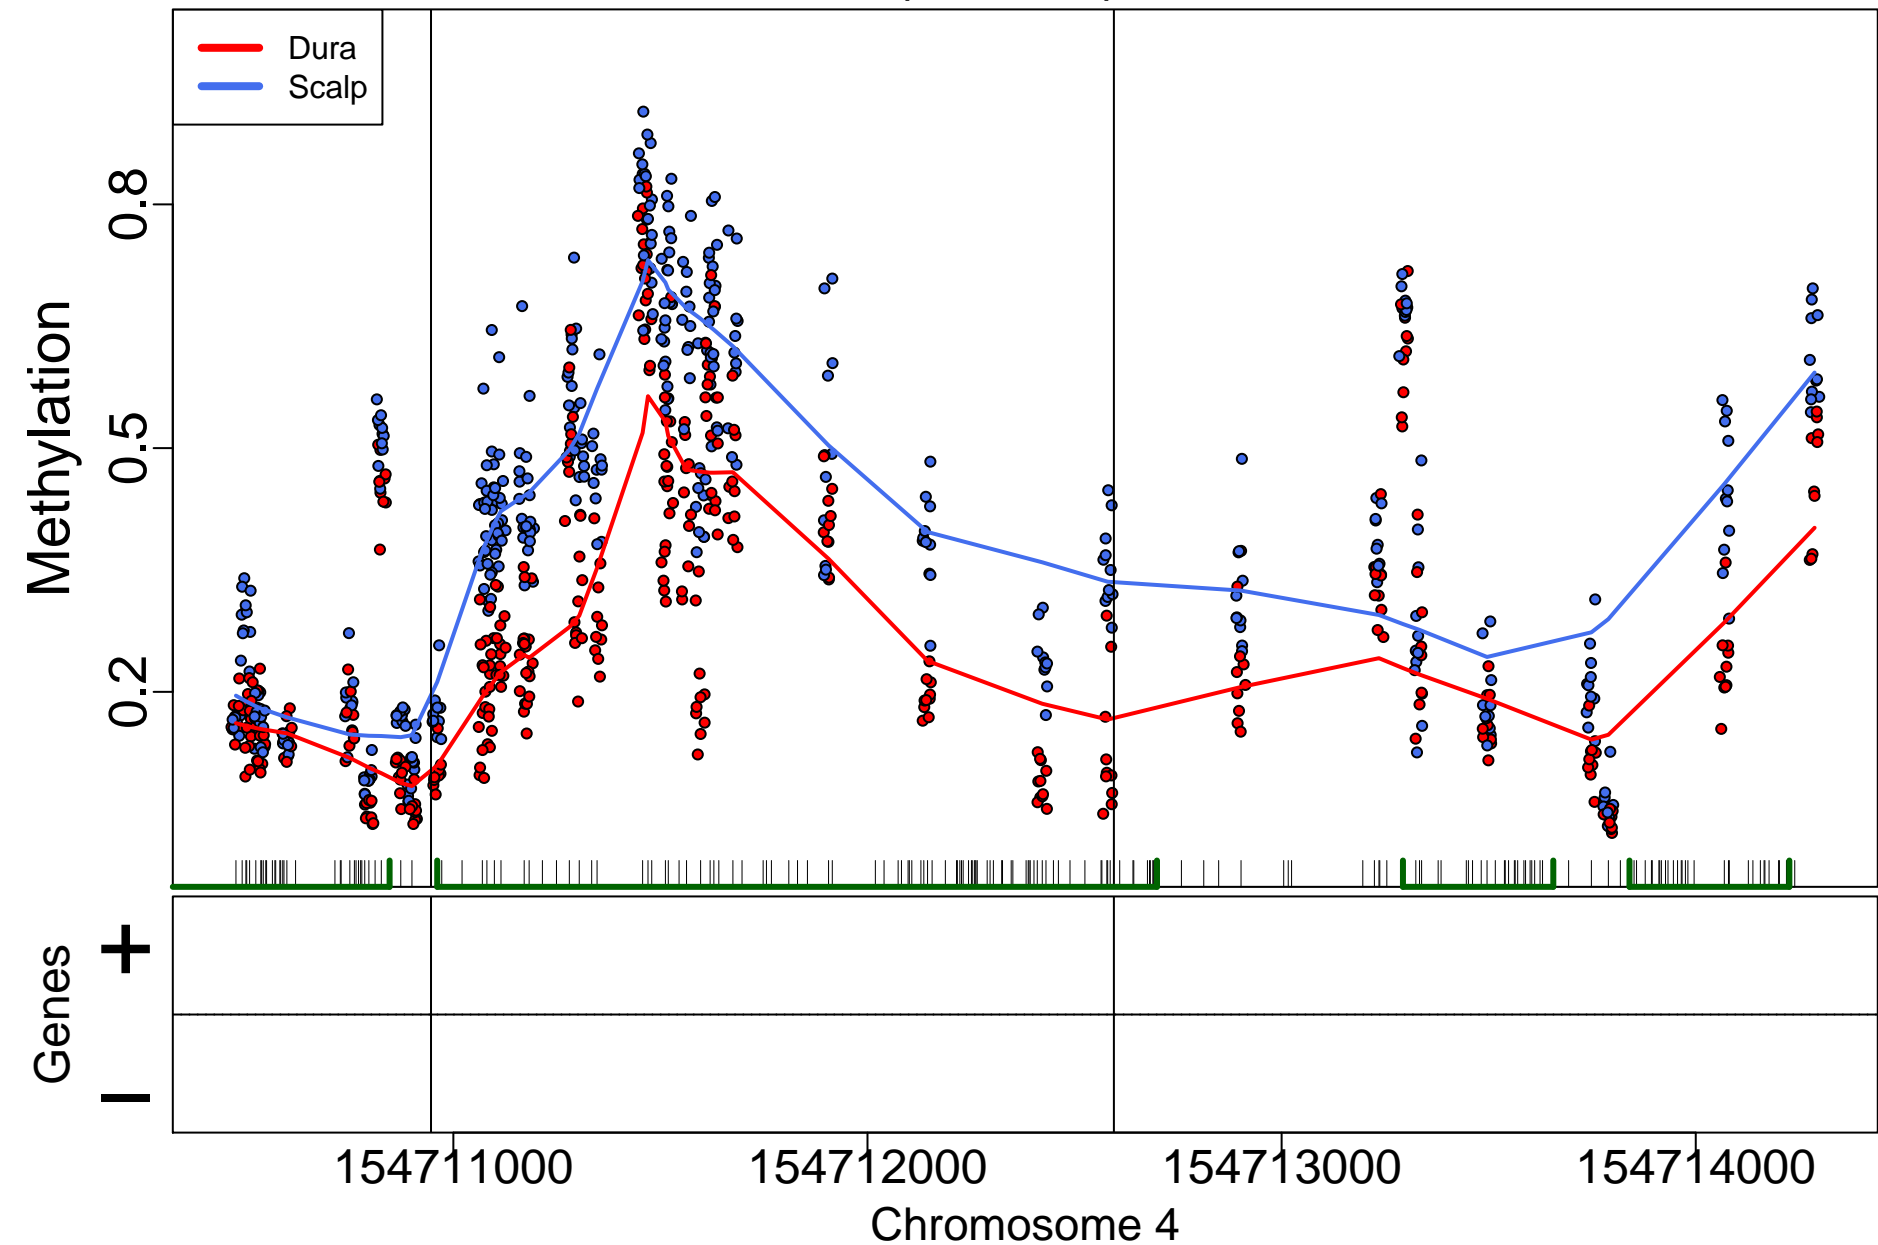

GDF7; 3663bp from tss:overlaps 3'

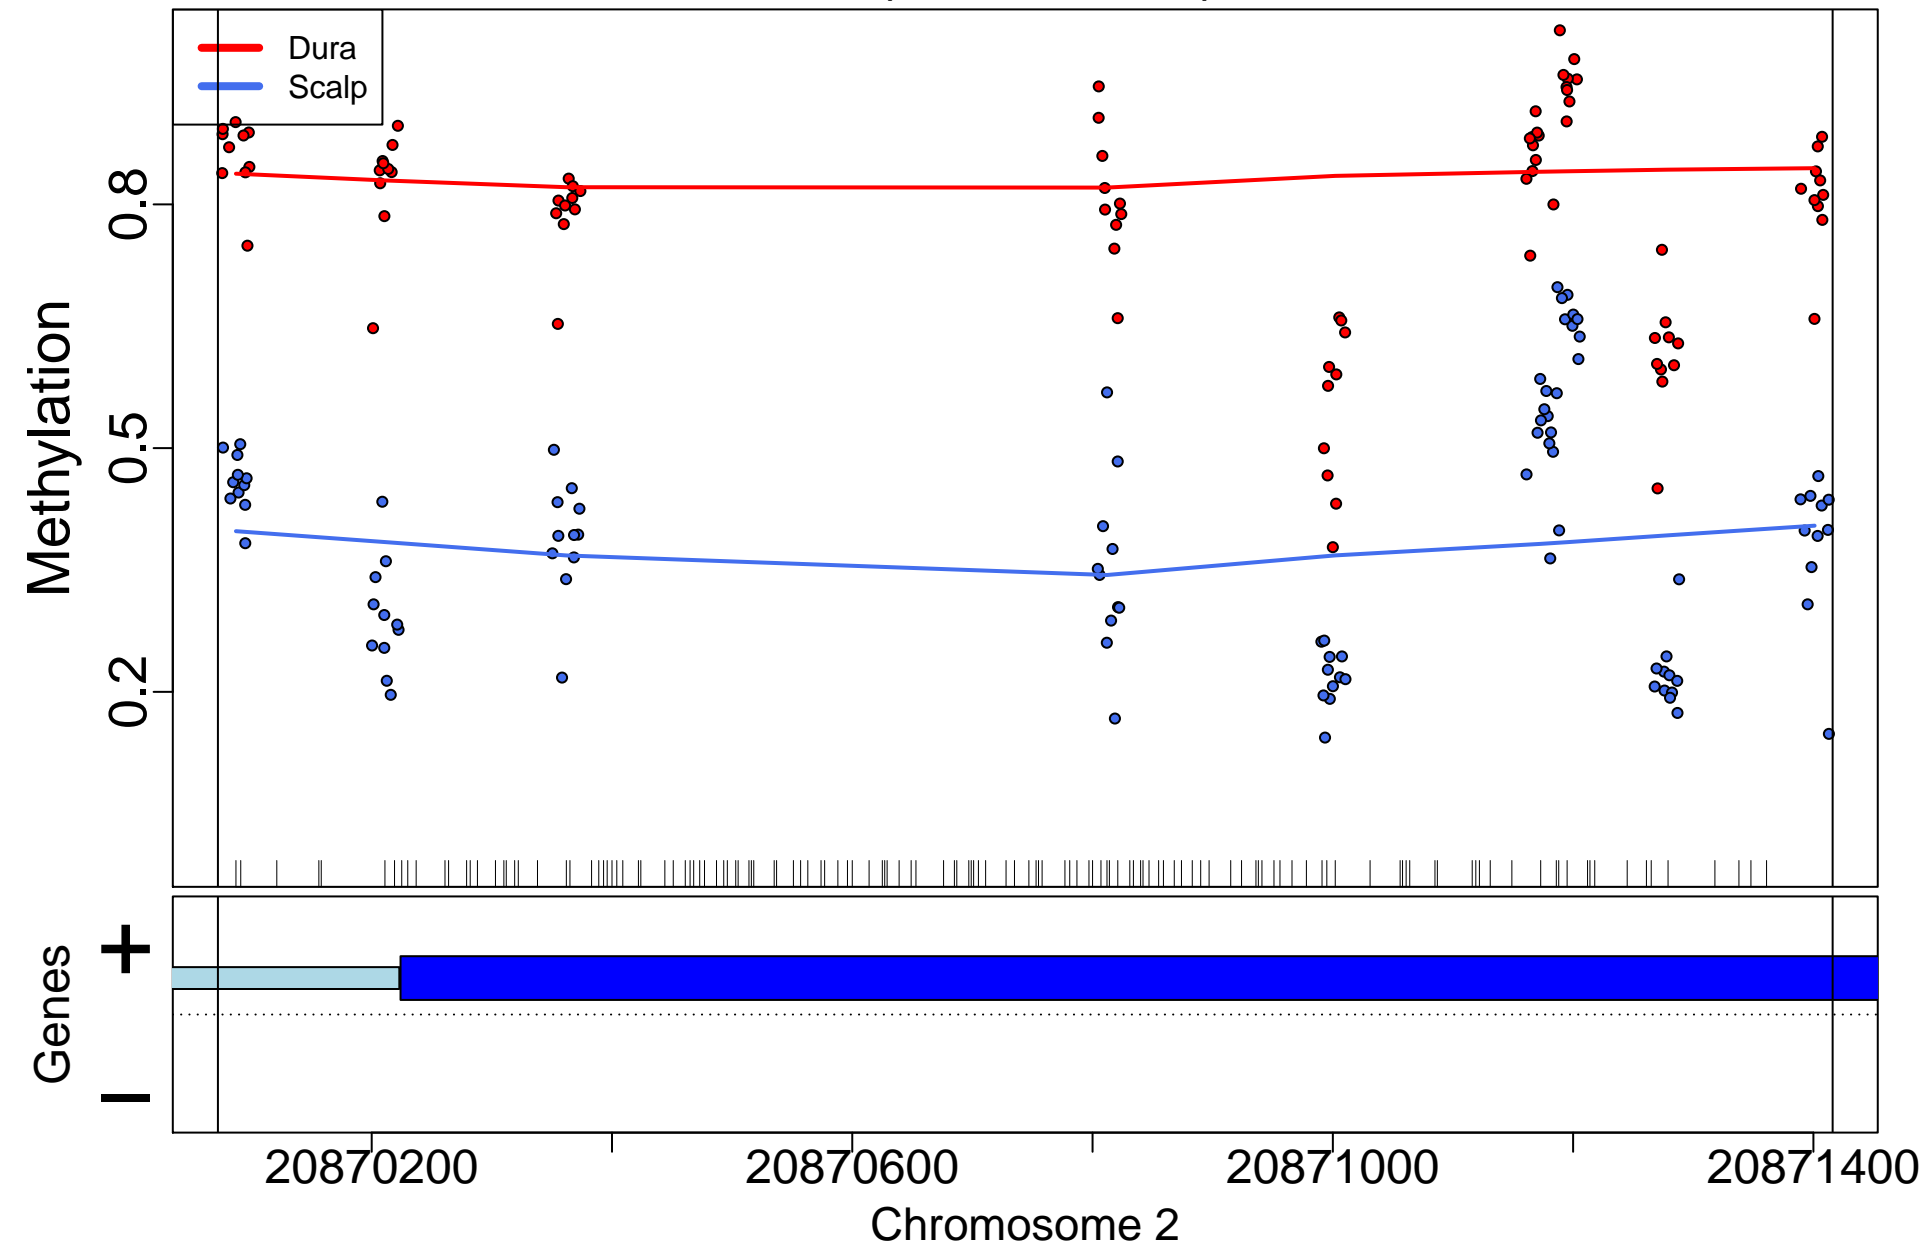



## HOXD-AS1; 0bp from tss:NA

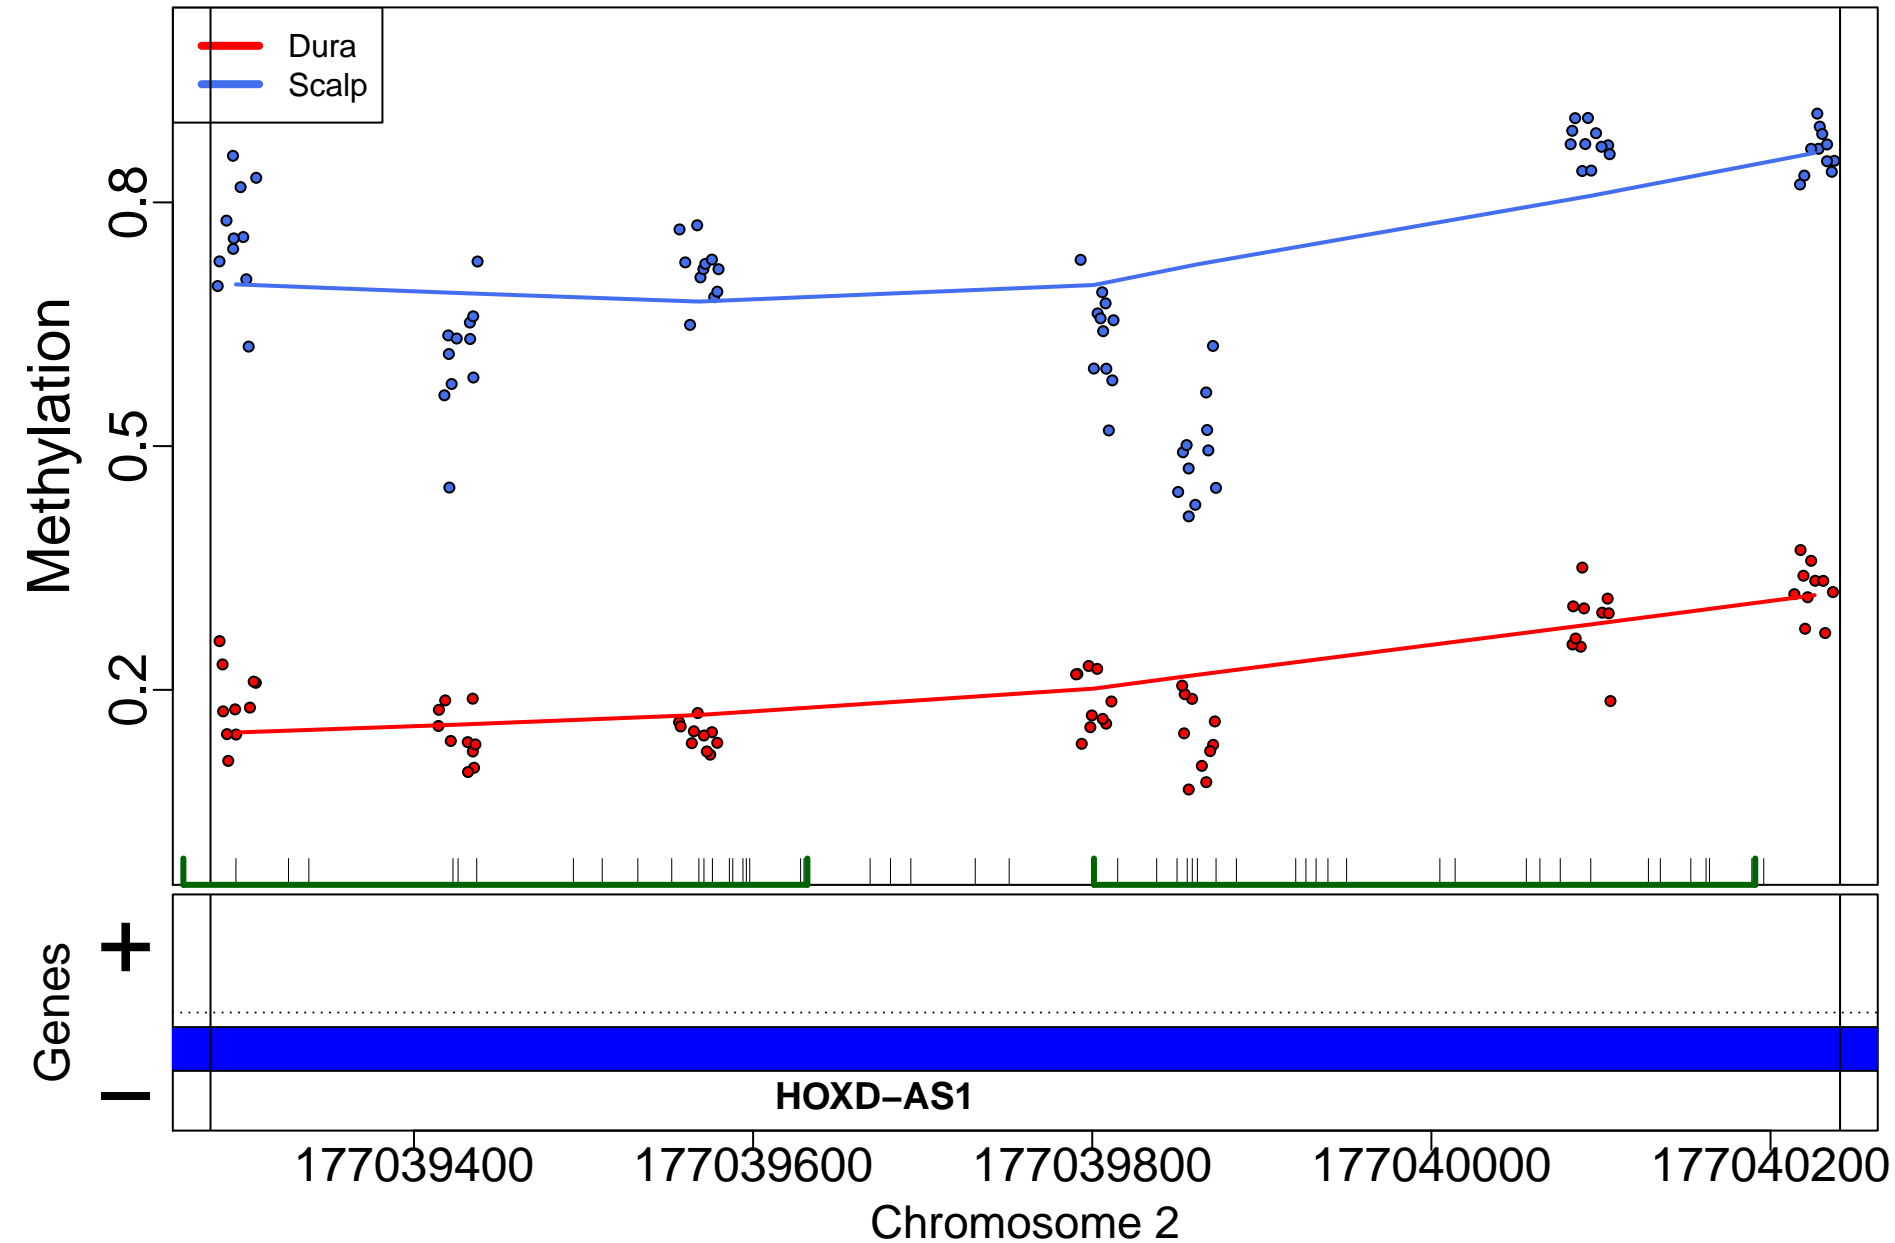

# HOXD9; 871bp from tss:overlaps two exons

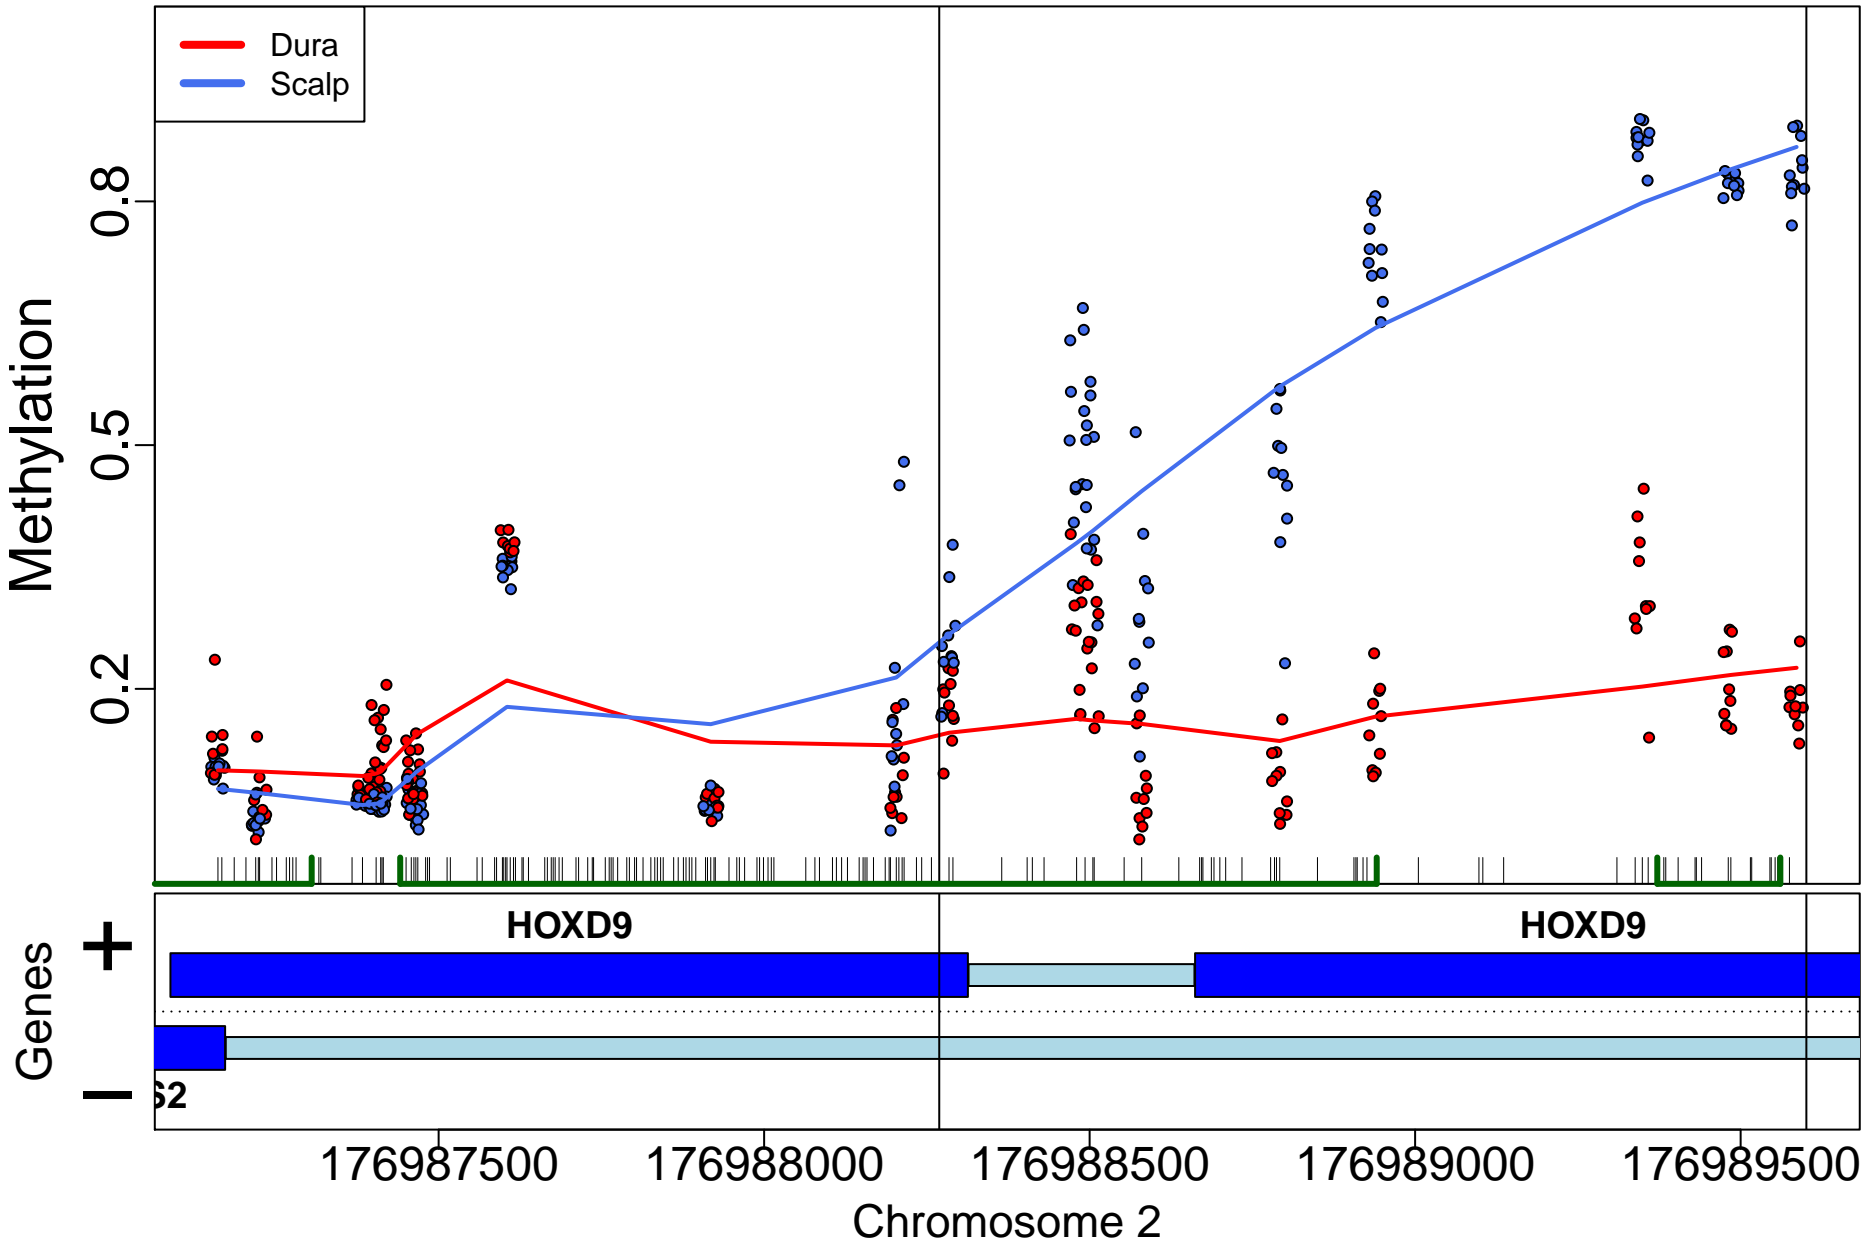

IFITM1; 0bp from tss:overlaps 5'

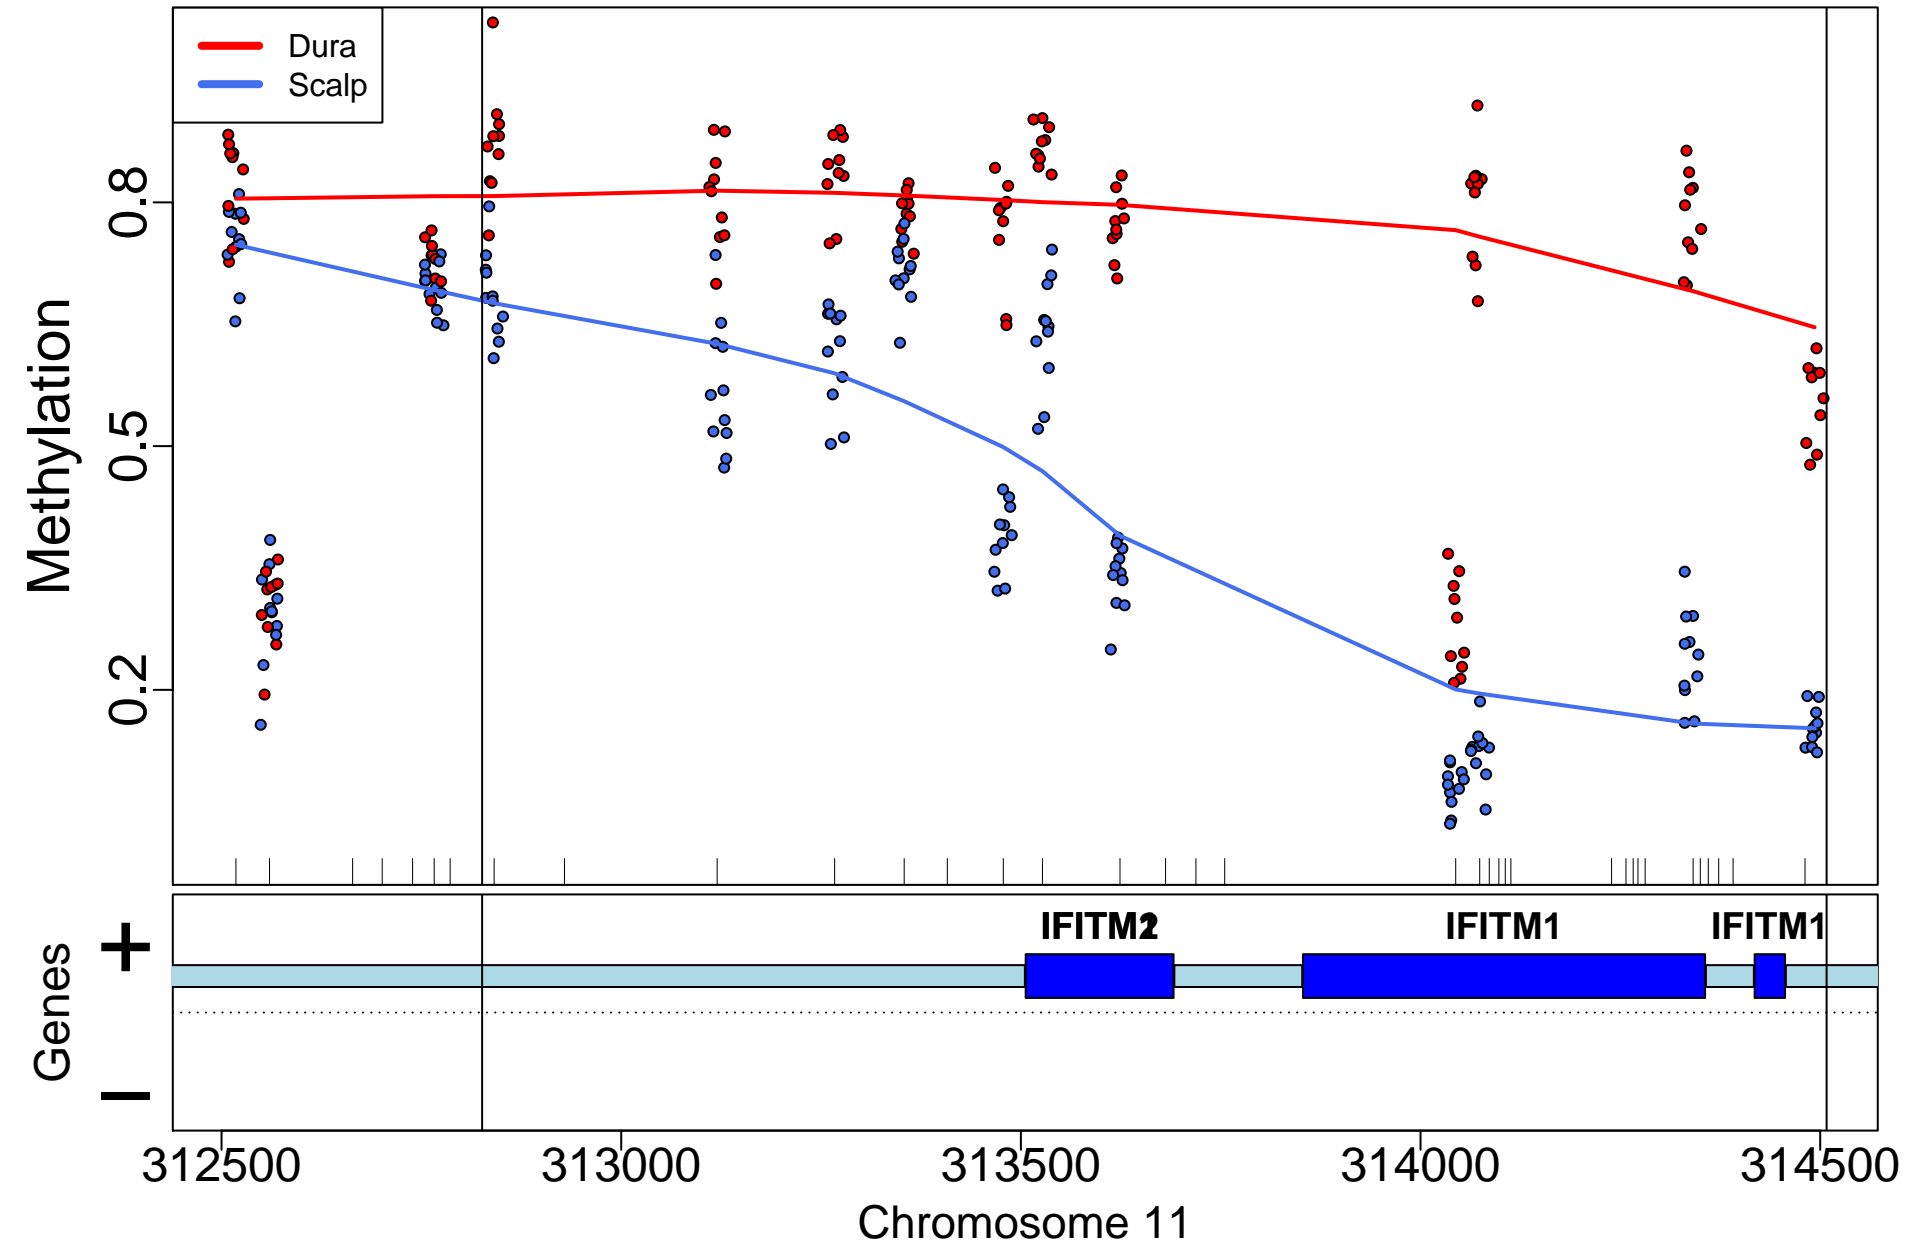

SLC9A3; 21629bp from tss:inside intron

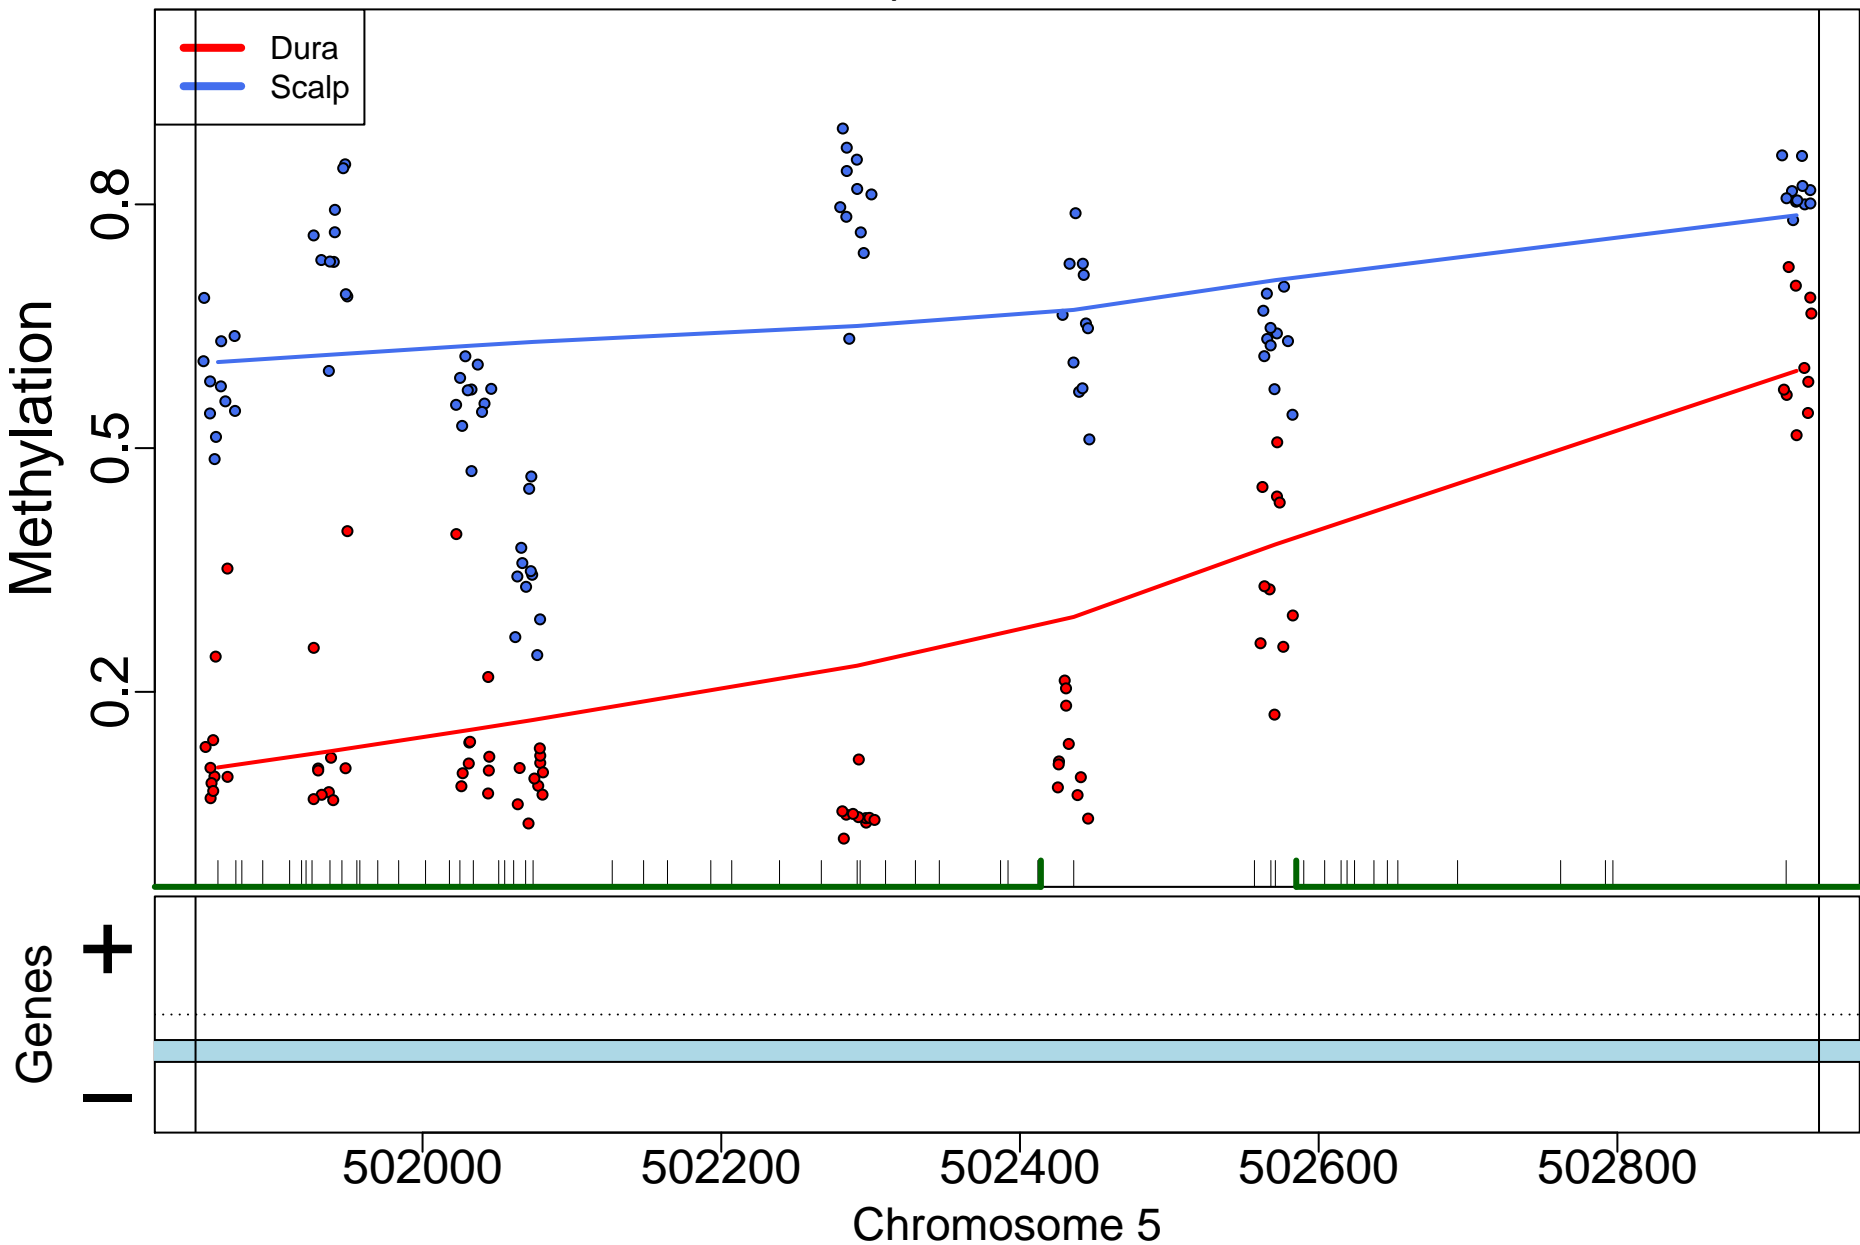

# RGS22; 0bp from tss:NA

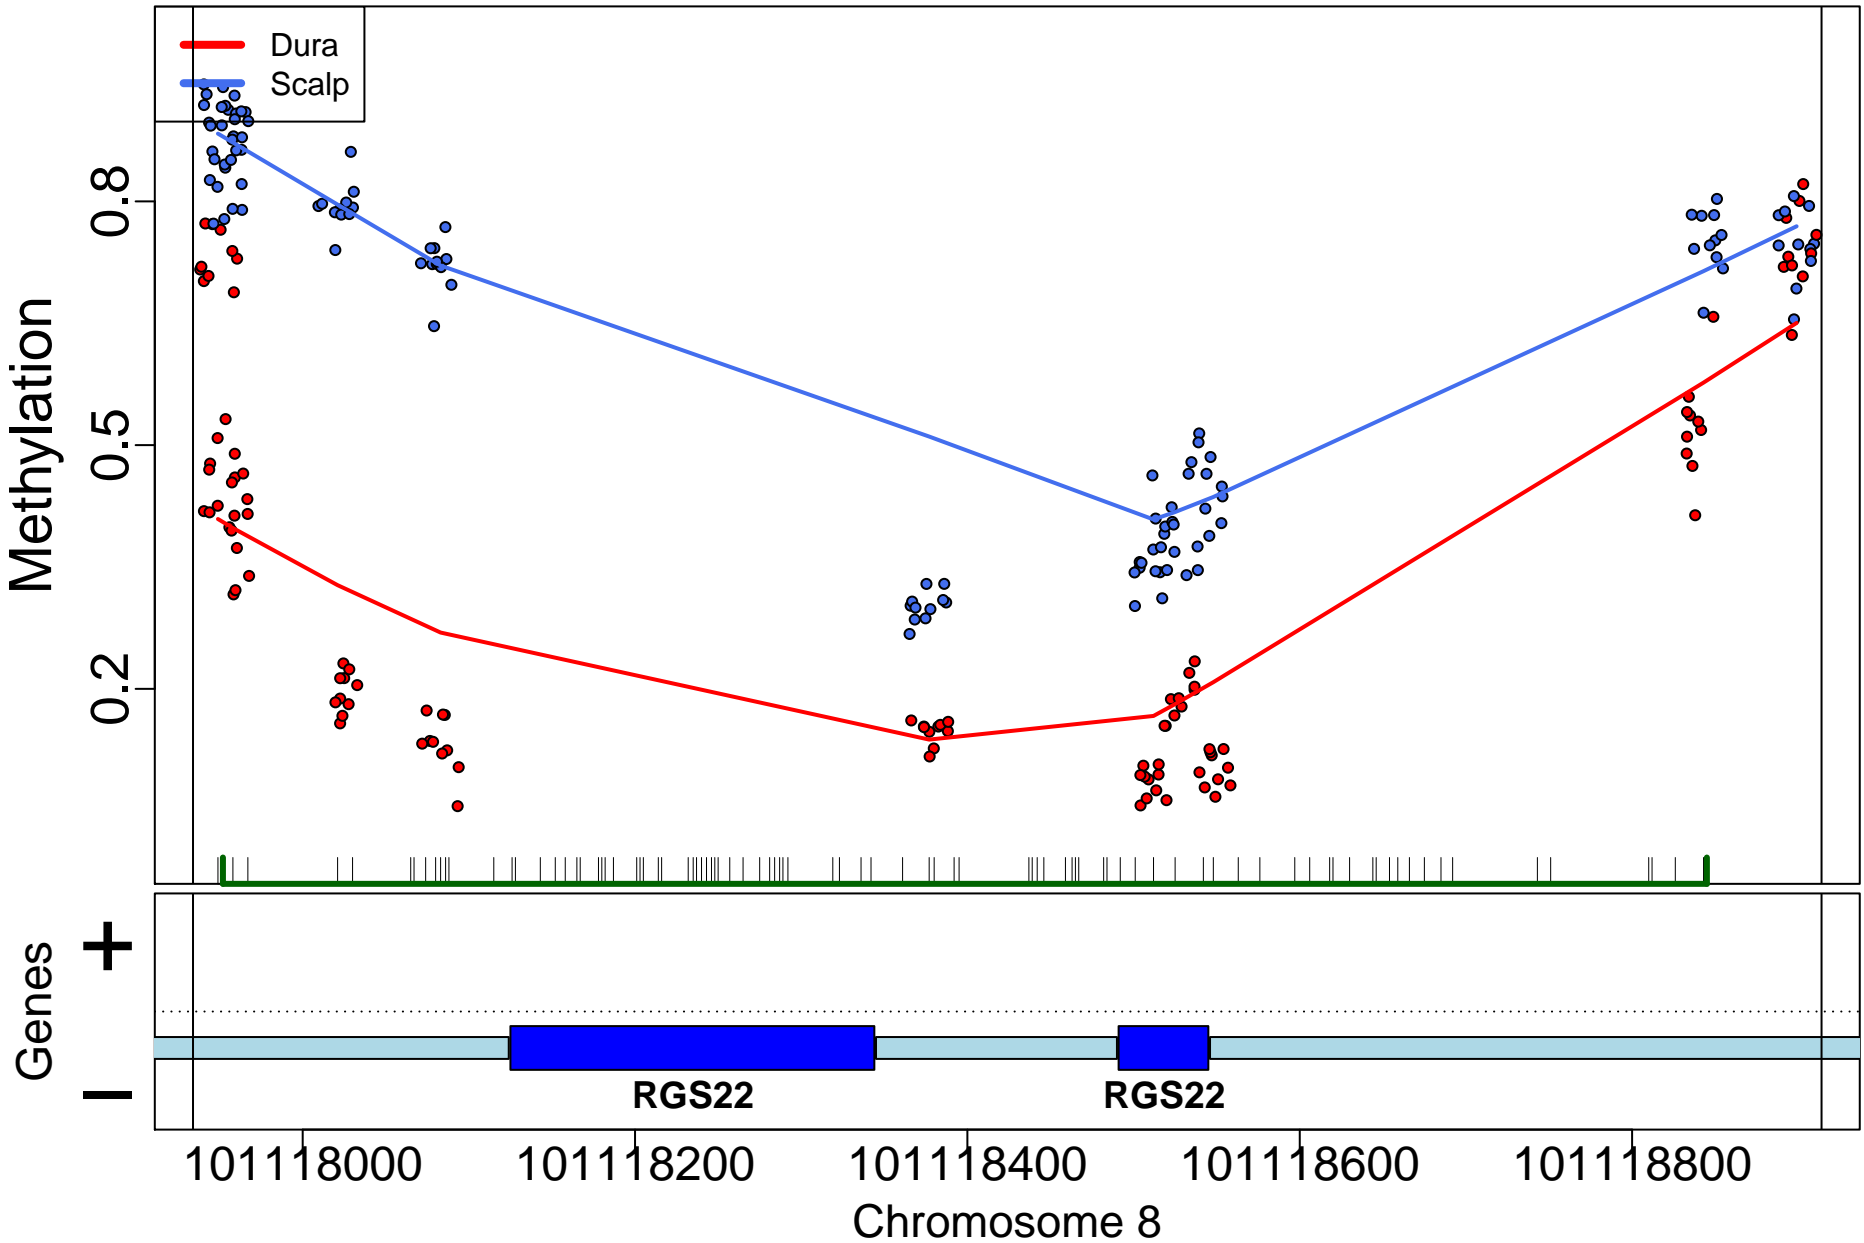

SIX6; 1413bp from tss:promoter

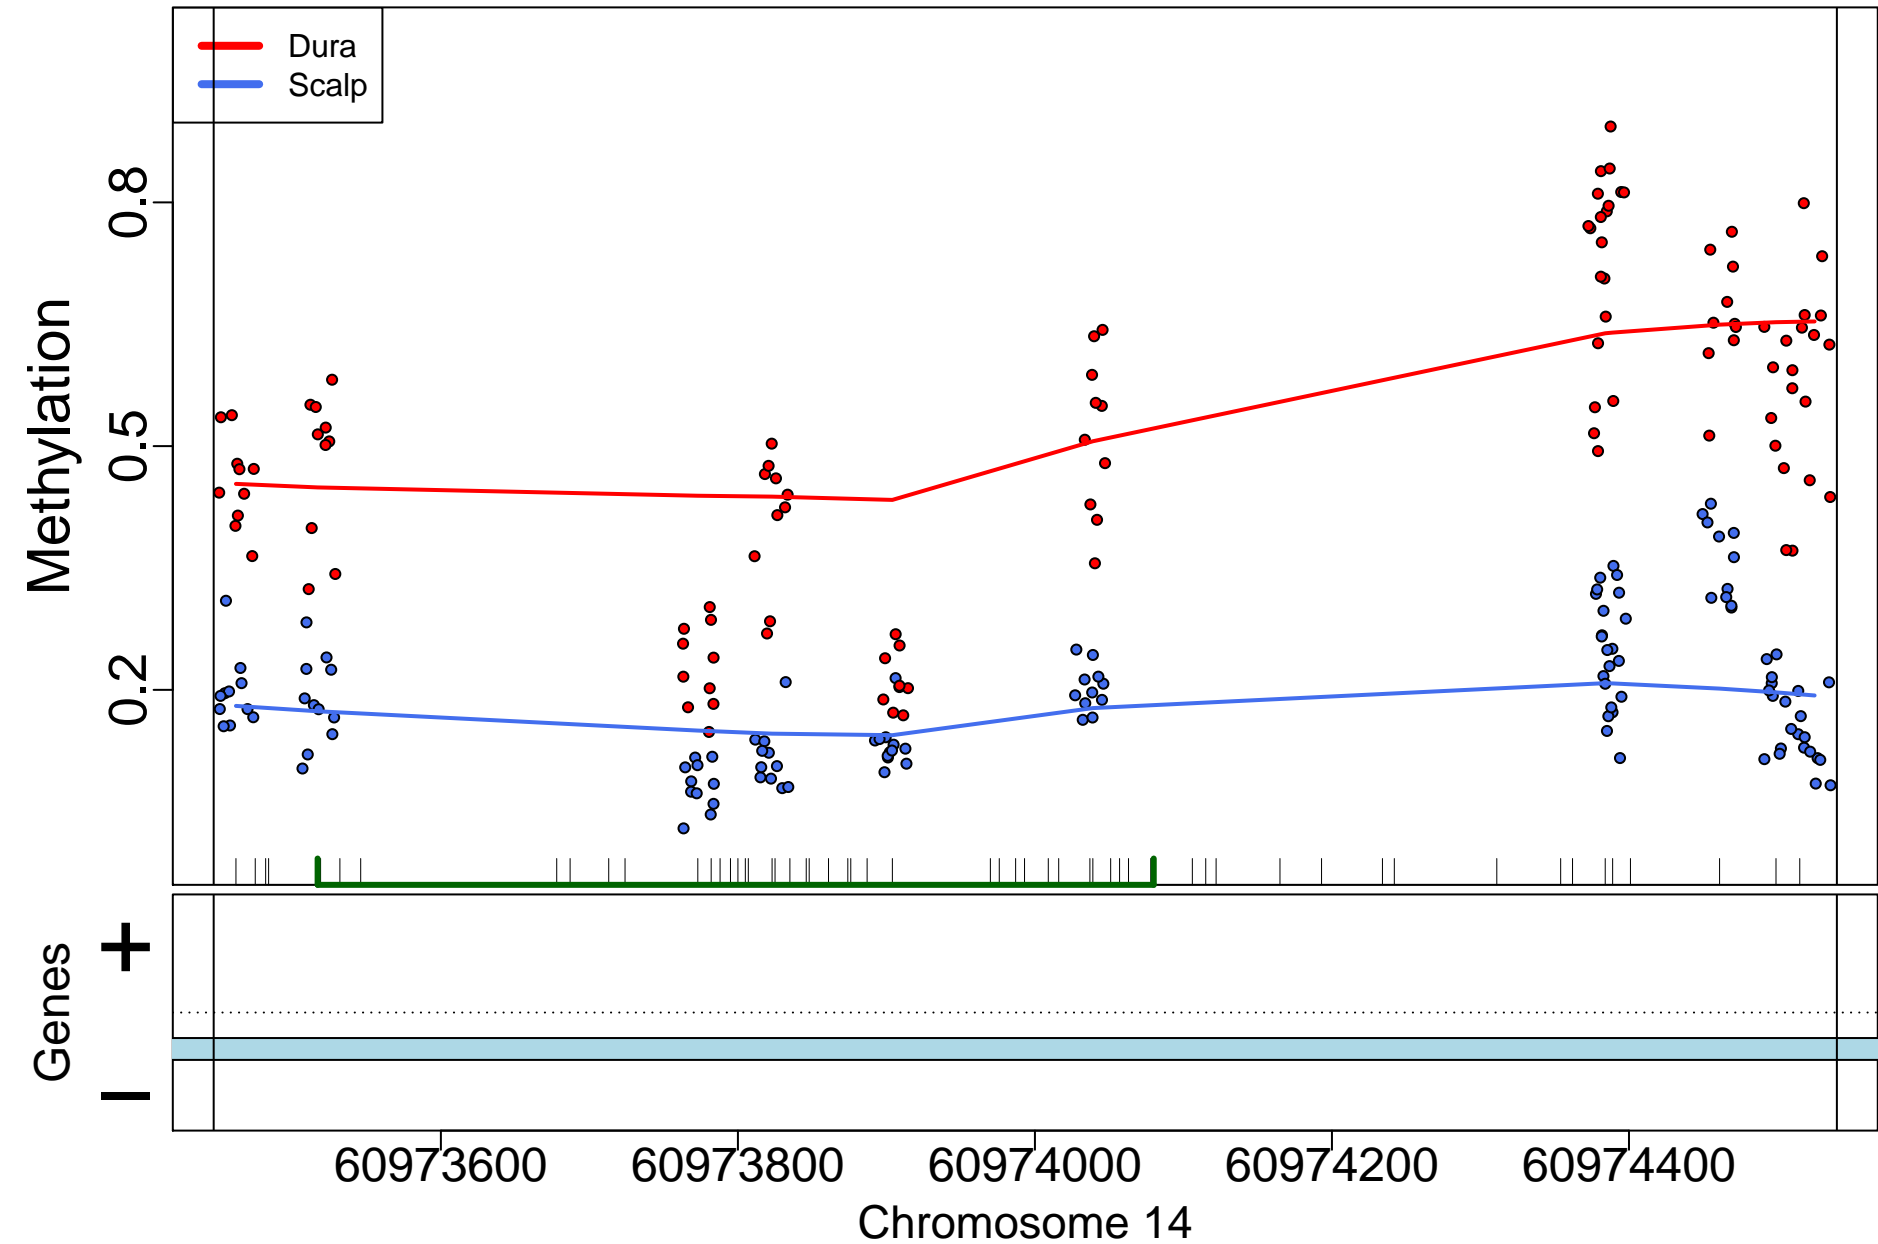

GFM1; 26120bp from tss:inside intron

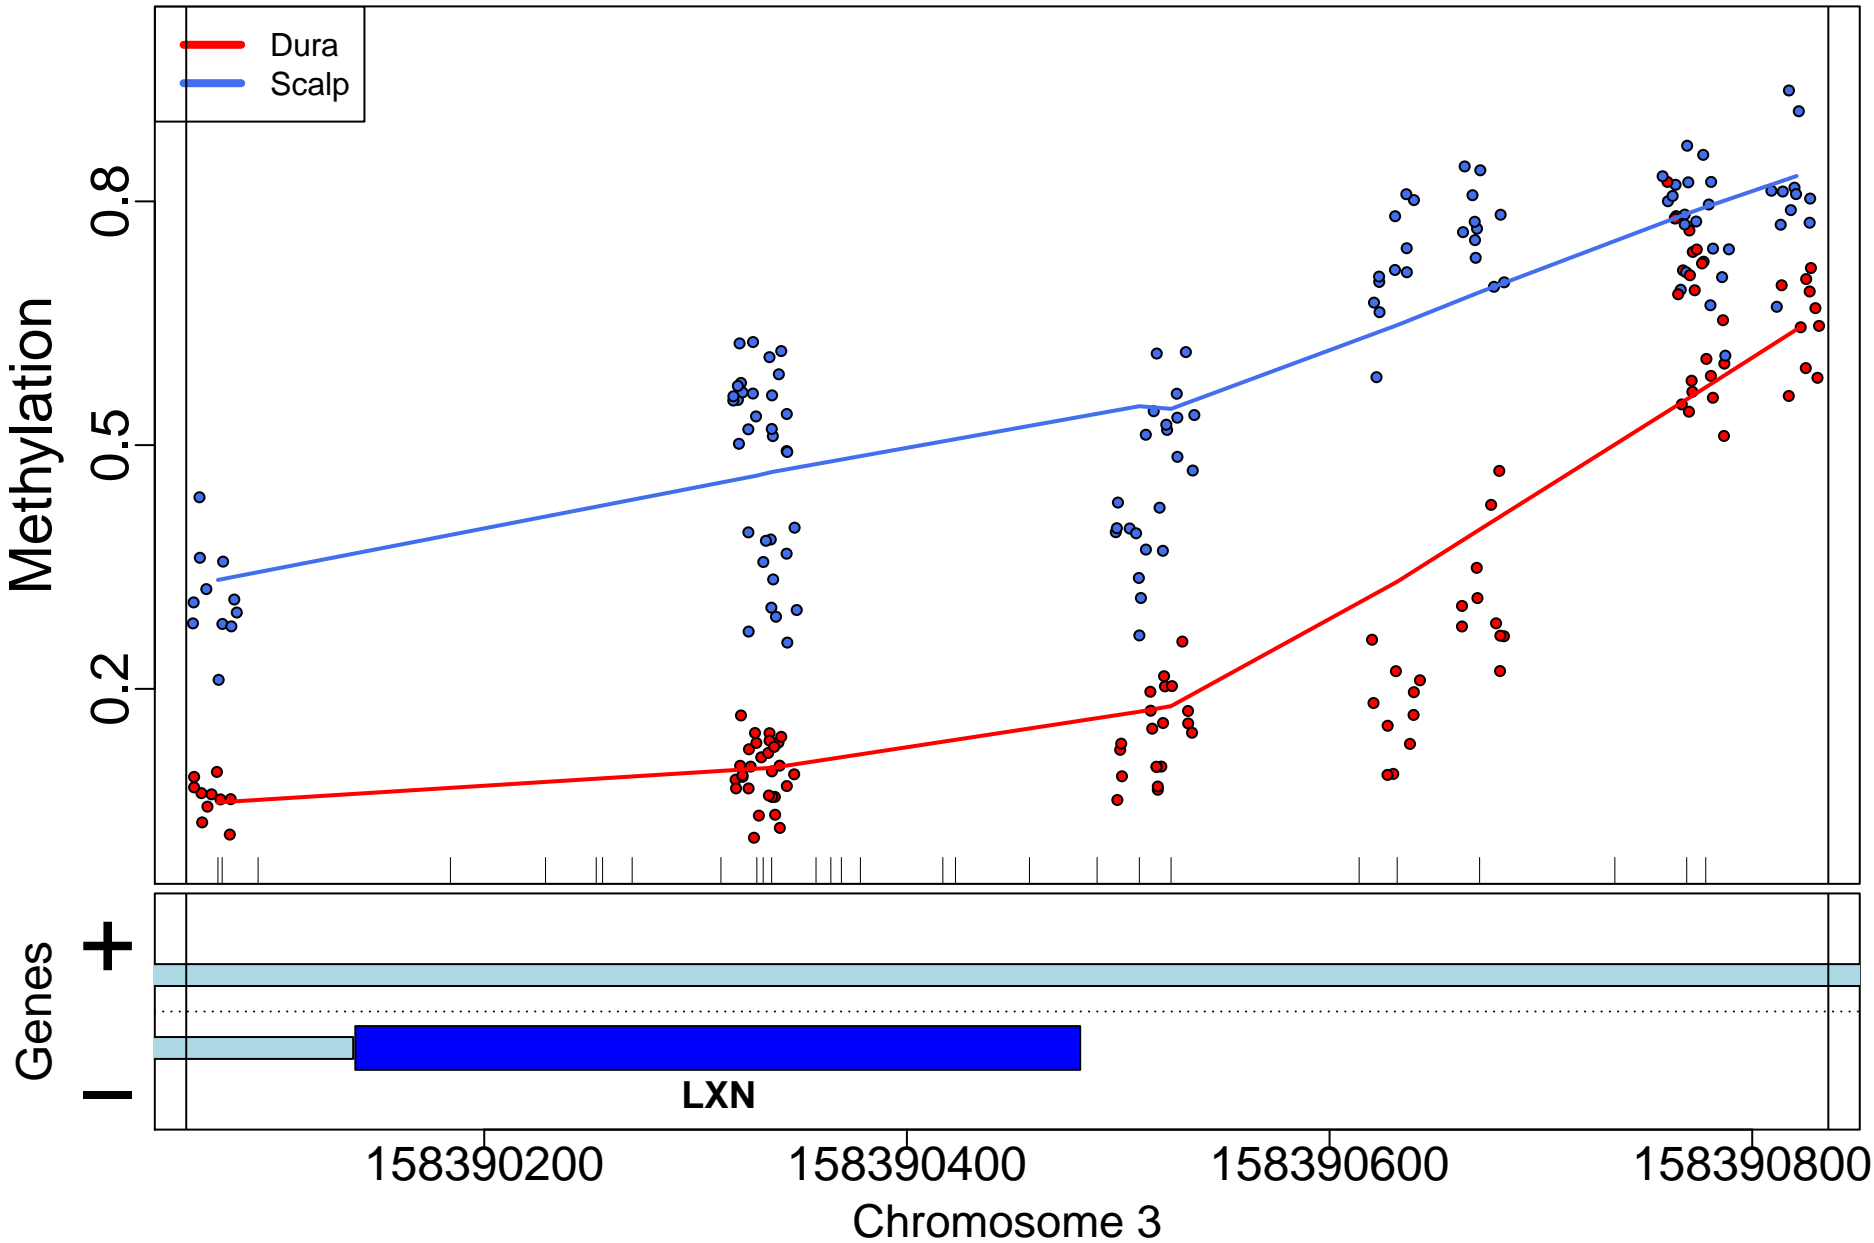

SDK1; 708451bp from tss:inside intron

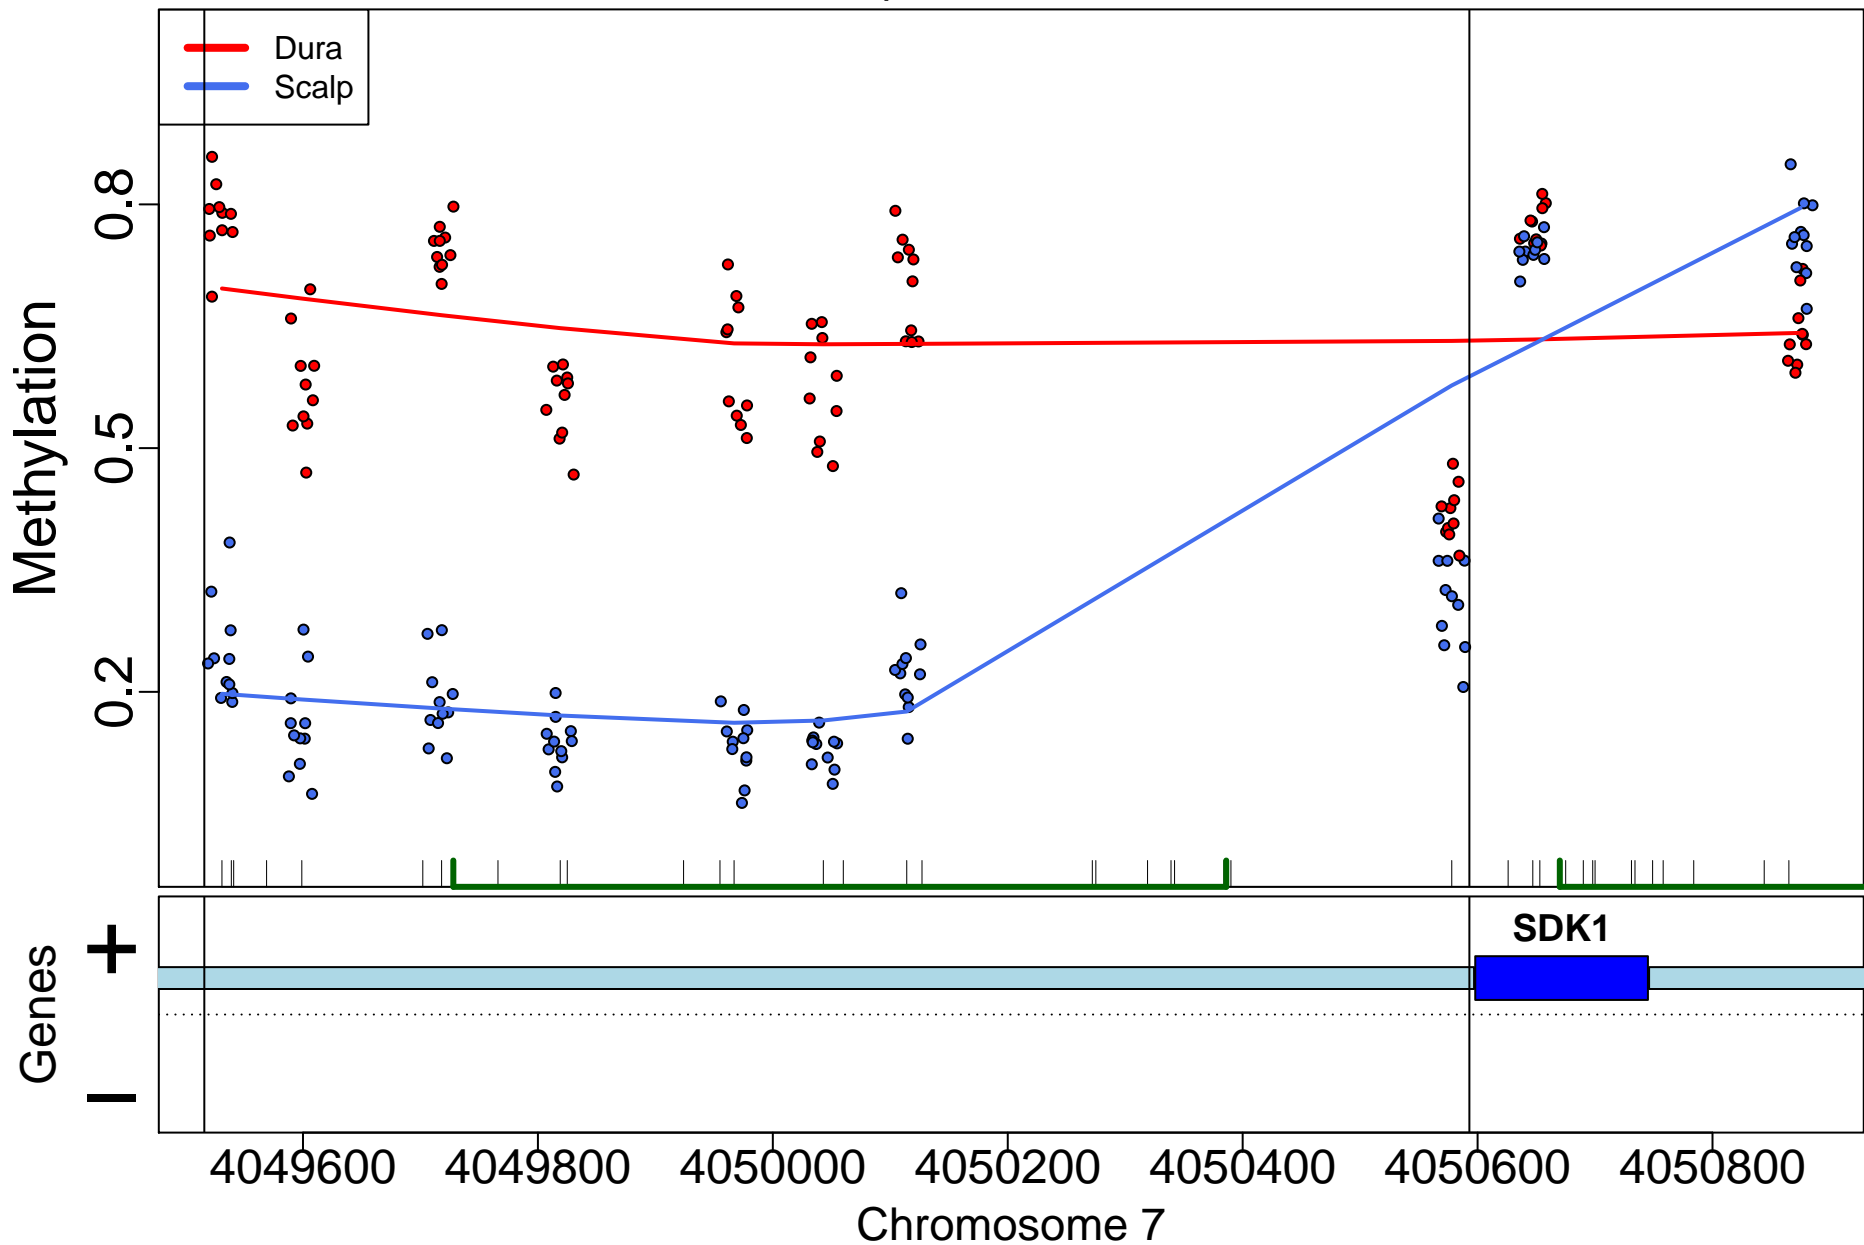



HOXD10; 3682bp from tss:downstream

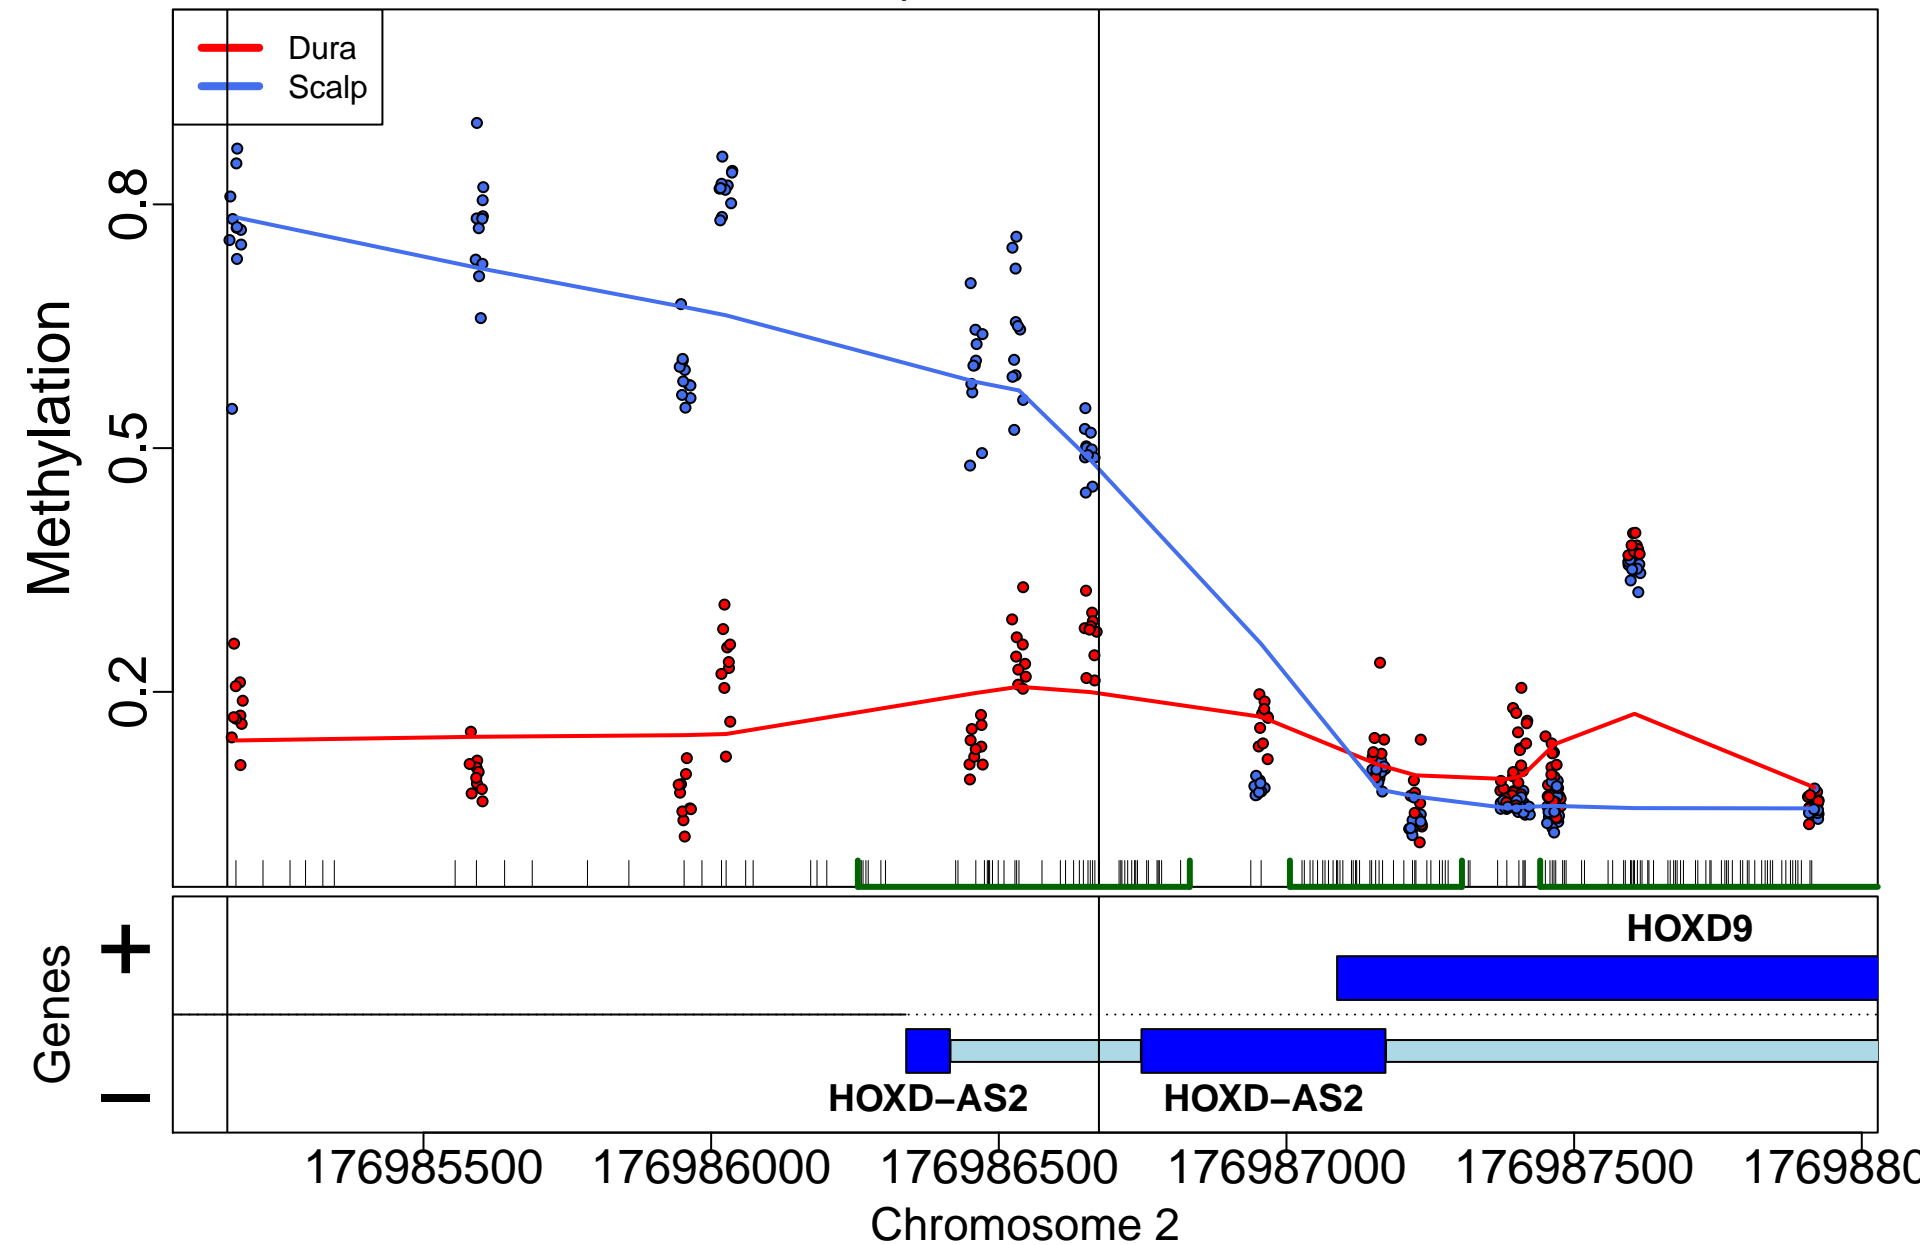

SIX2; 3654bp from tss:overlaps 3'

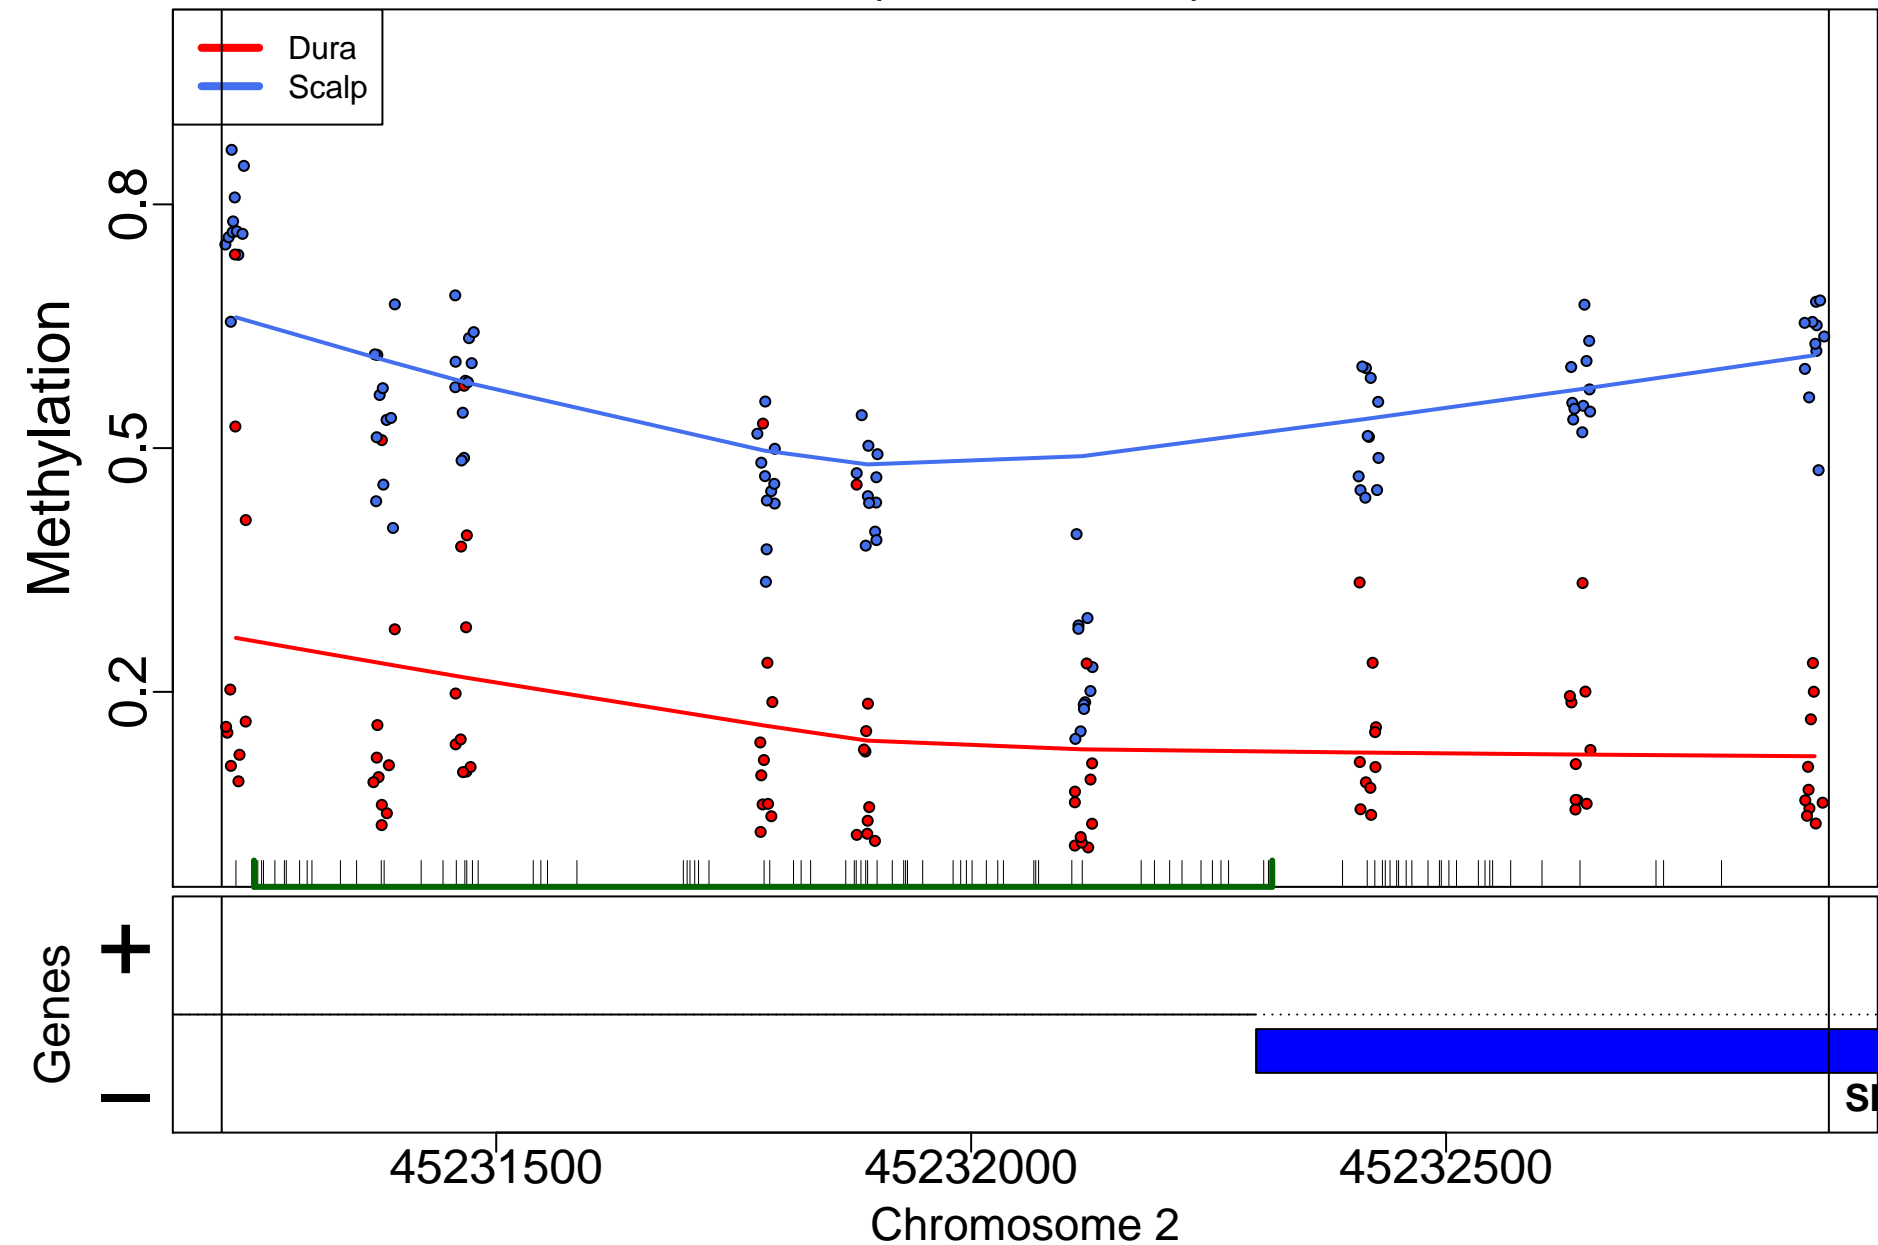

## MAD1L1; 212453bp from tss:inside intron

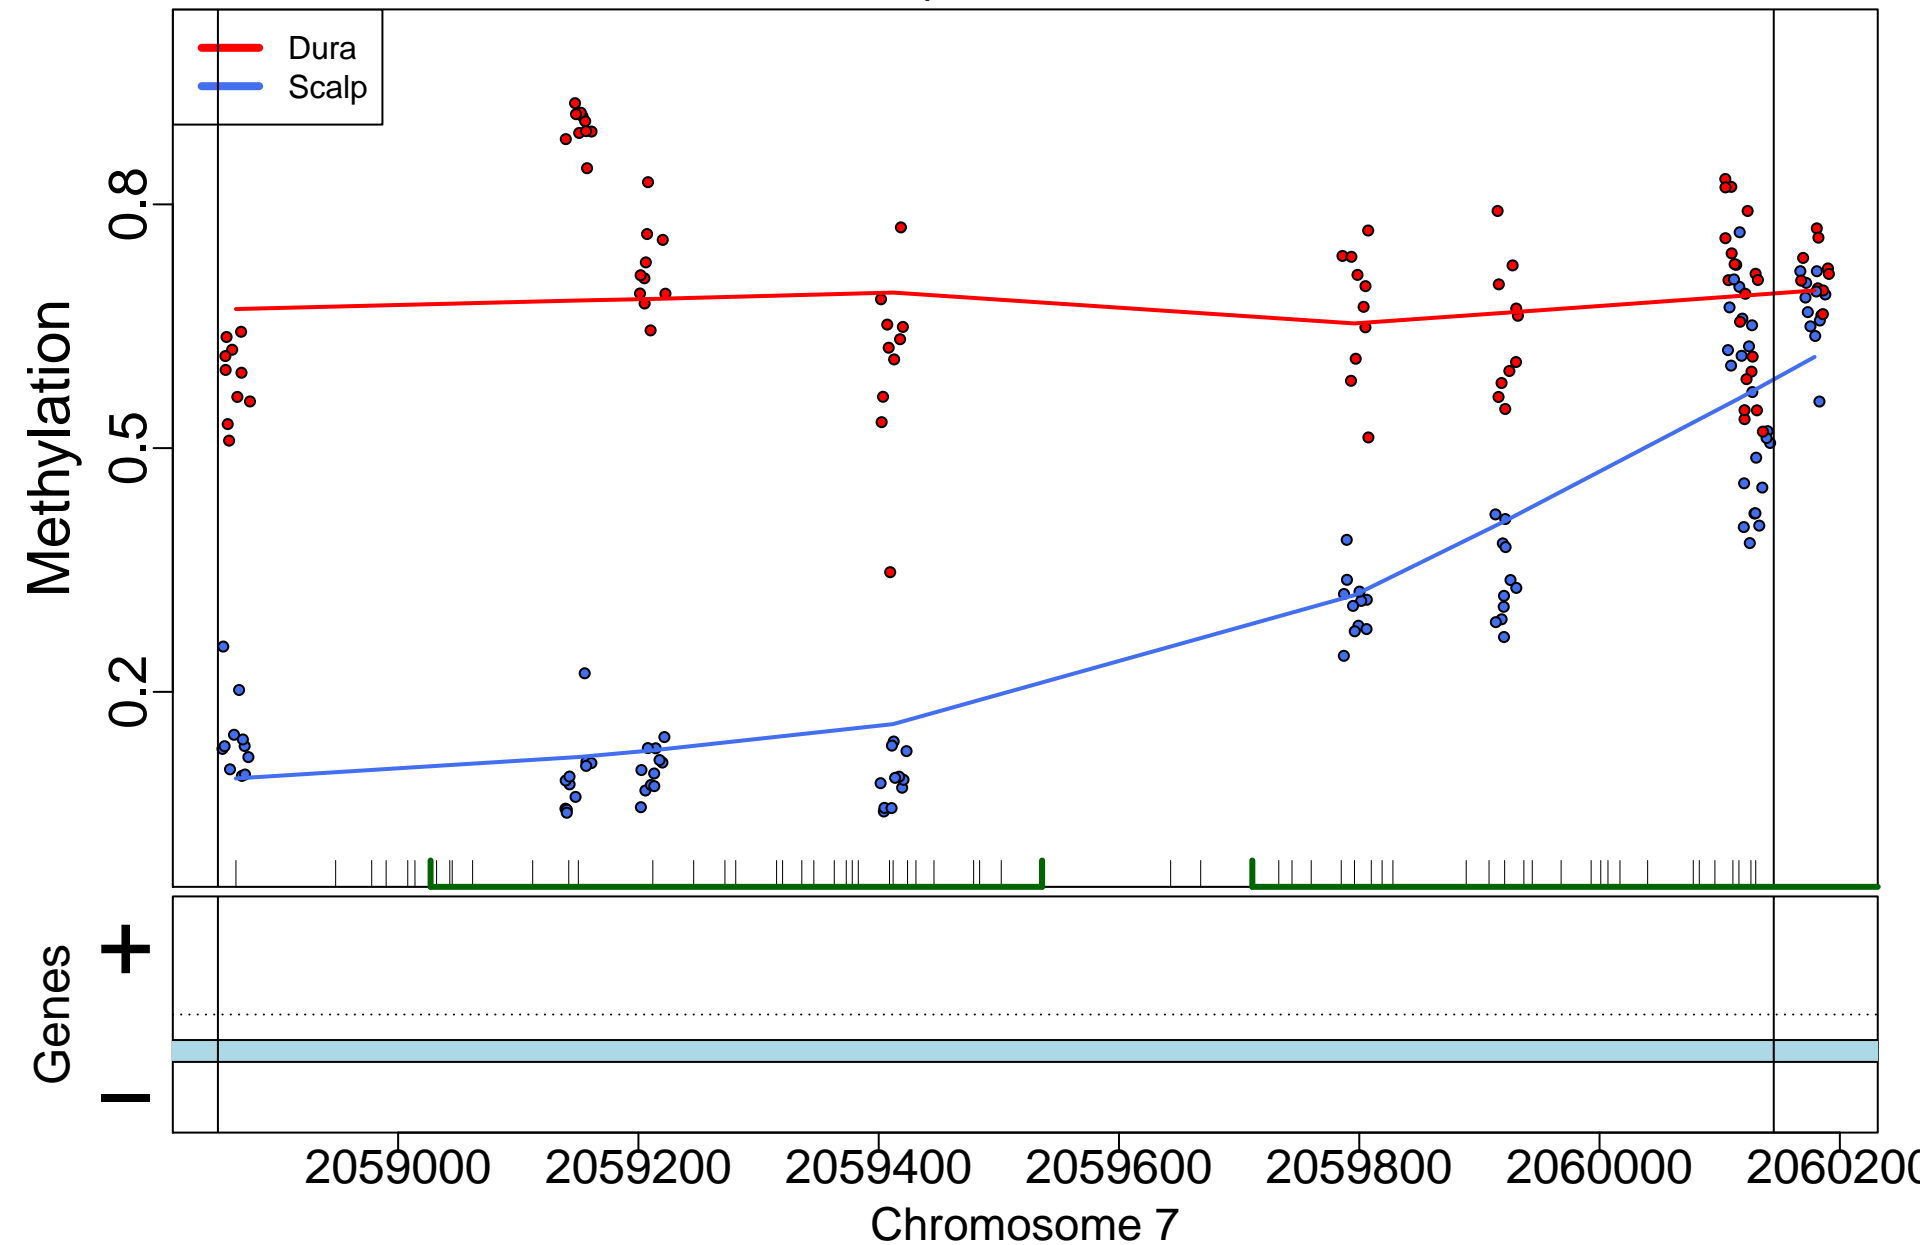

NBEA; 308881bp from tss:inside intron

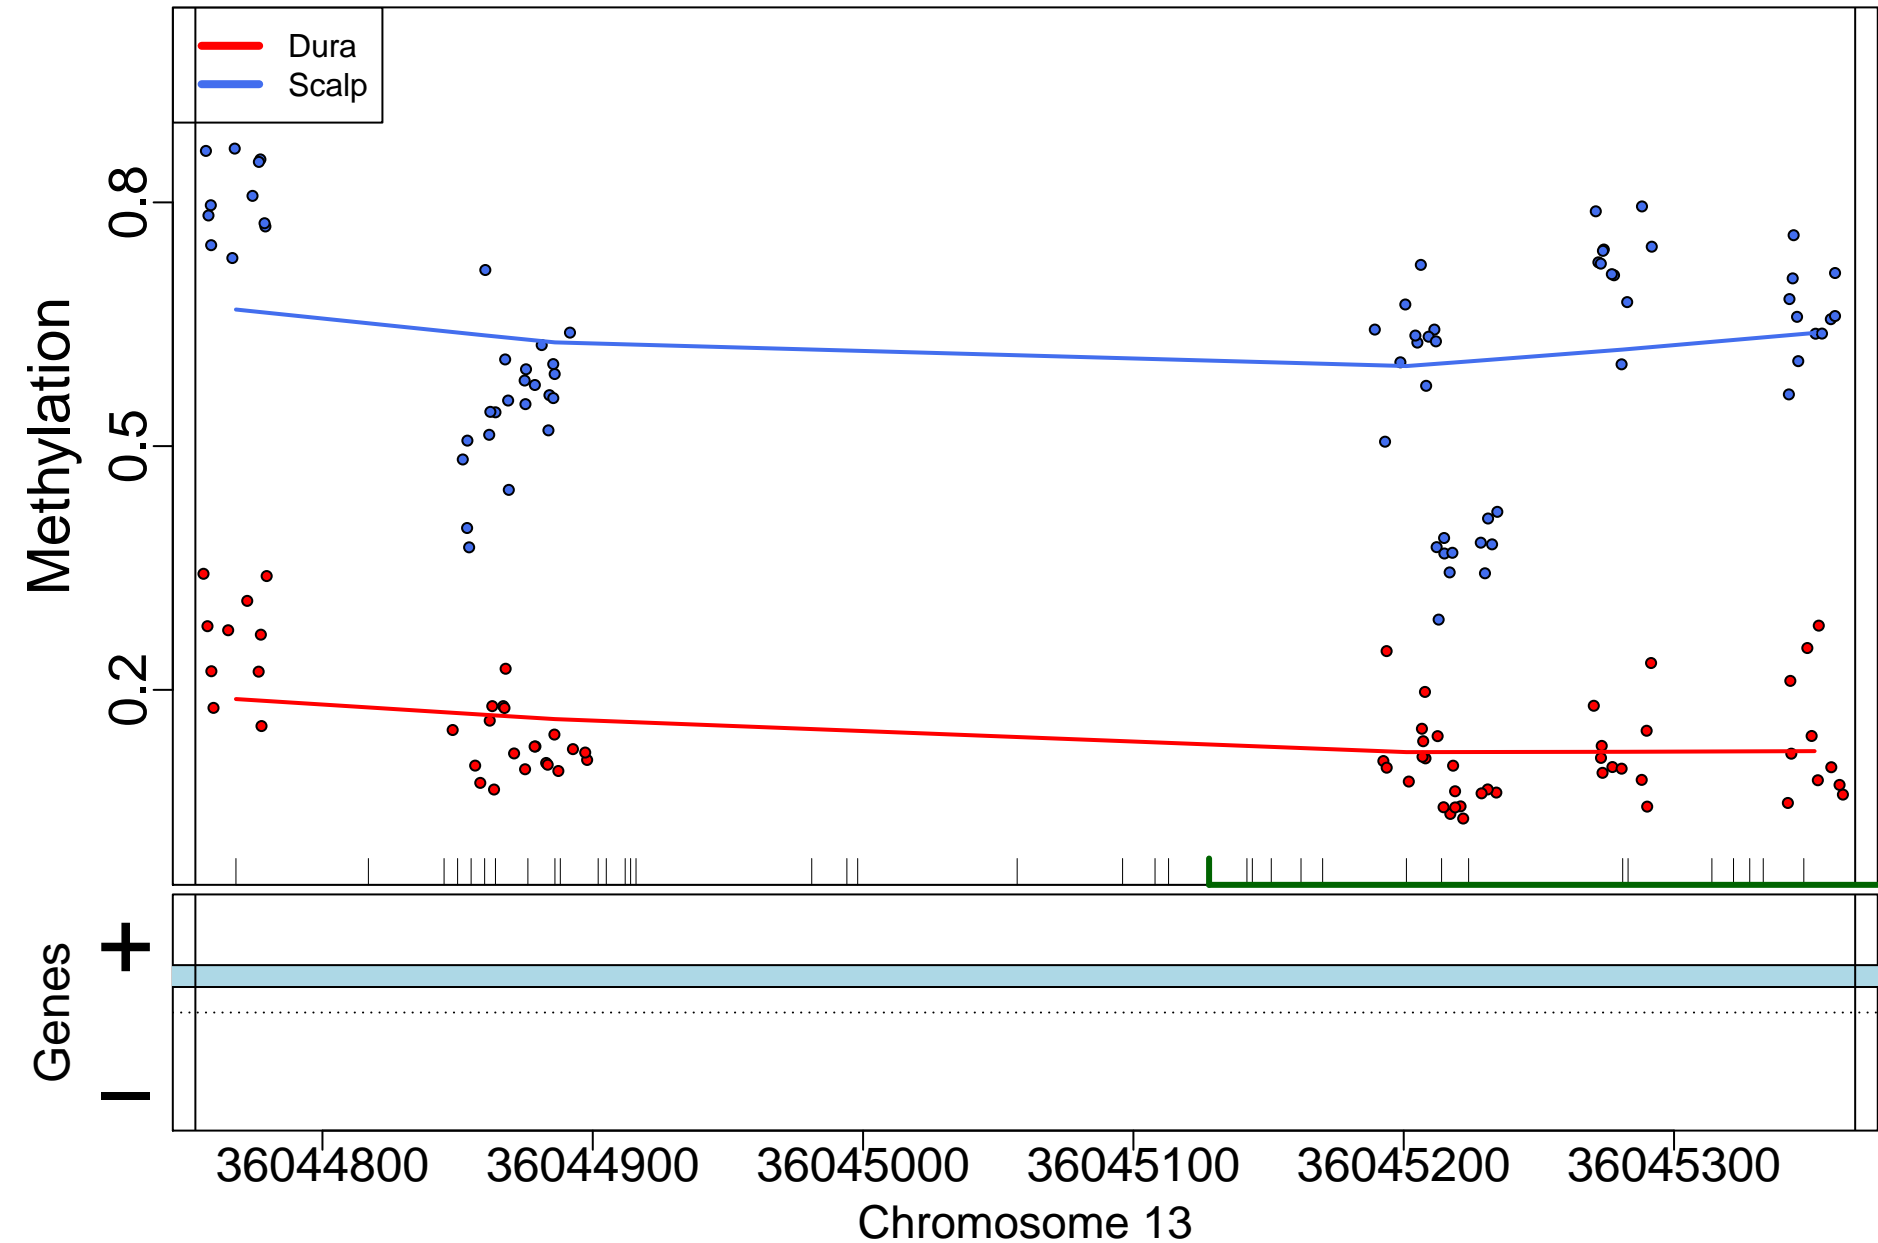

MIR548AP; 0bp from tss:NA

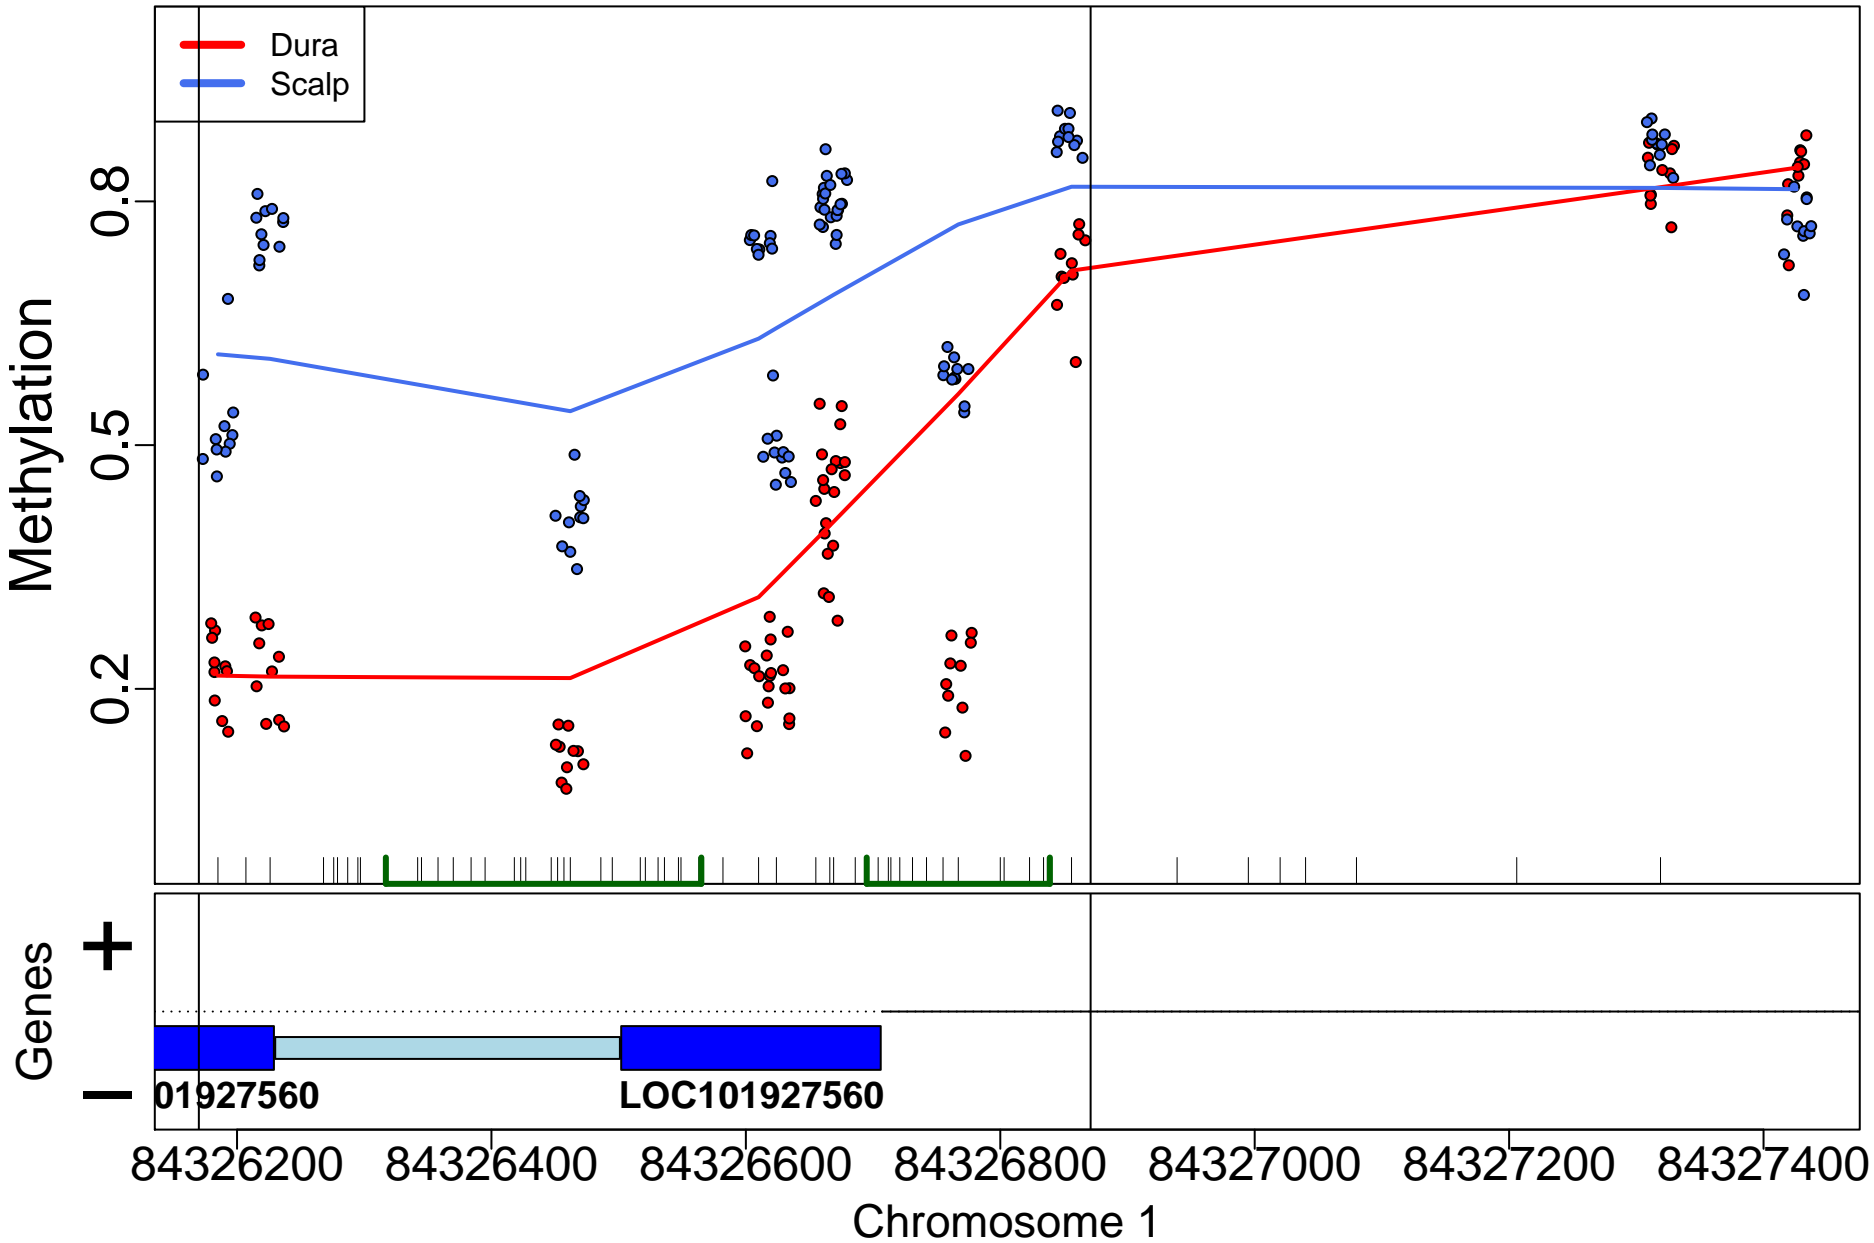

ZFH3; 4308bp from tss:upstream

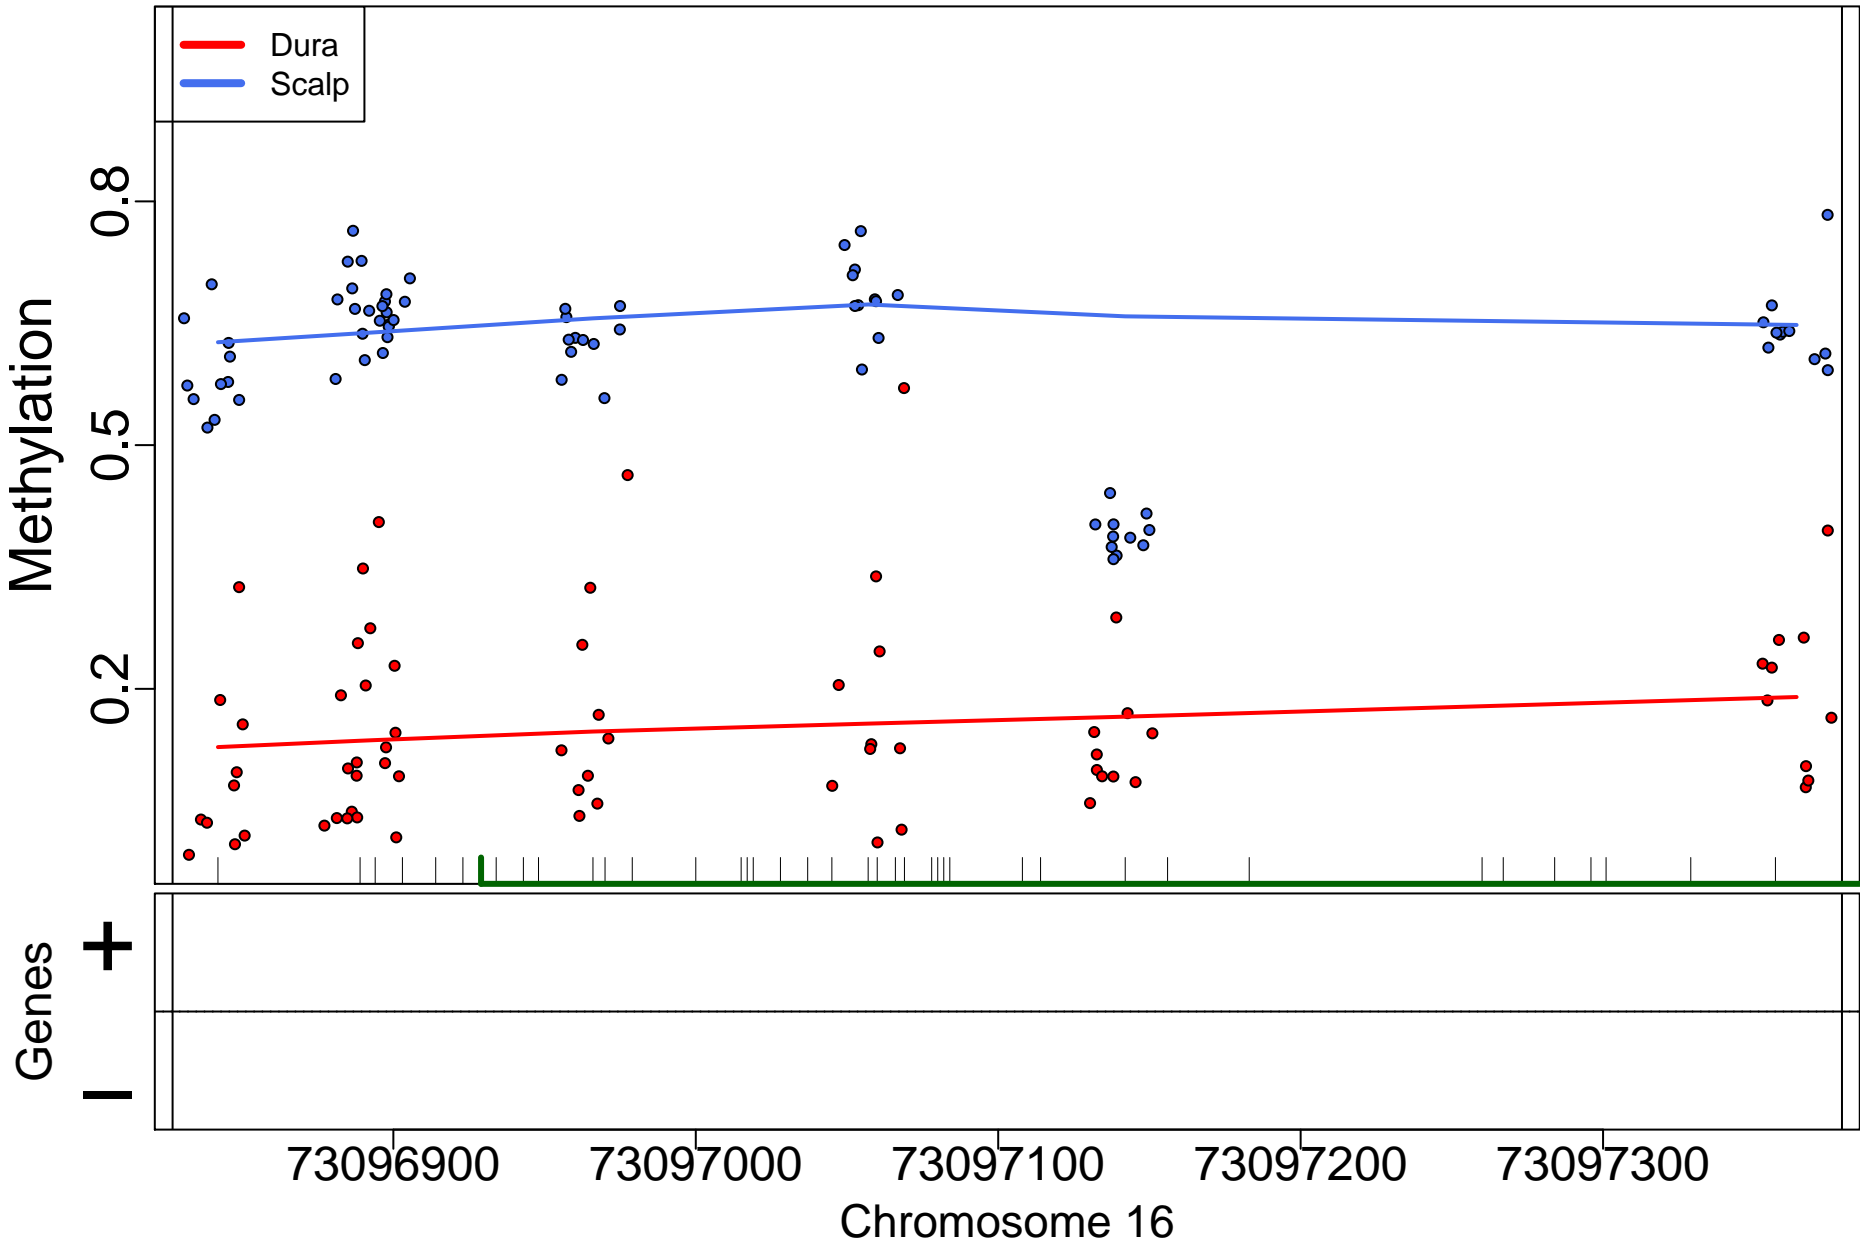

SCML4; 0bp from tss:overlaps 5'

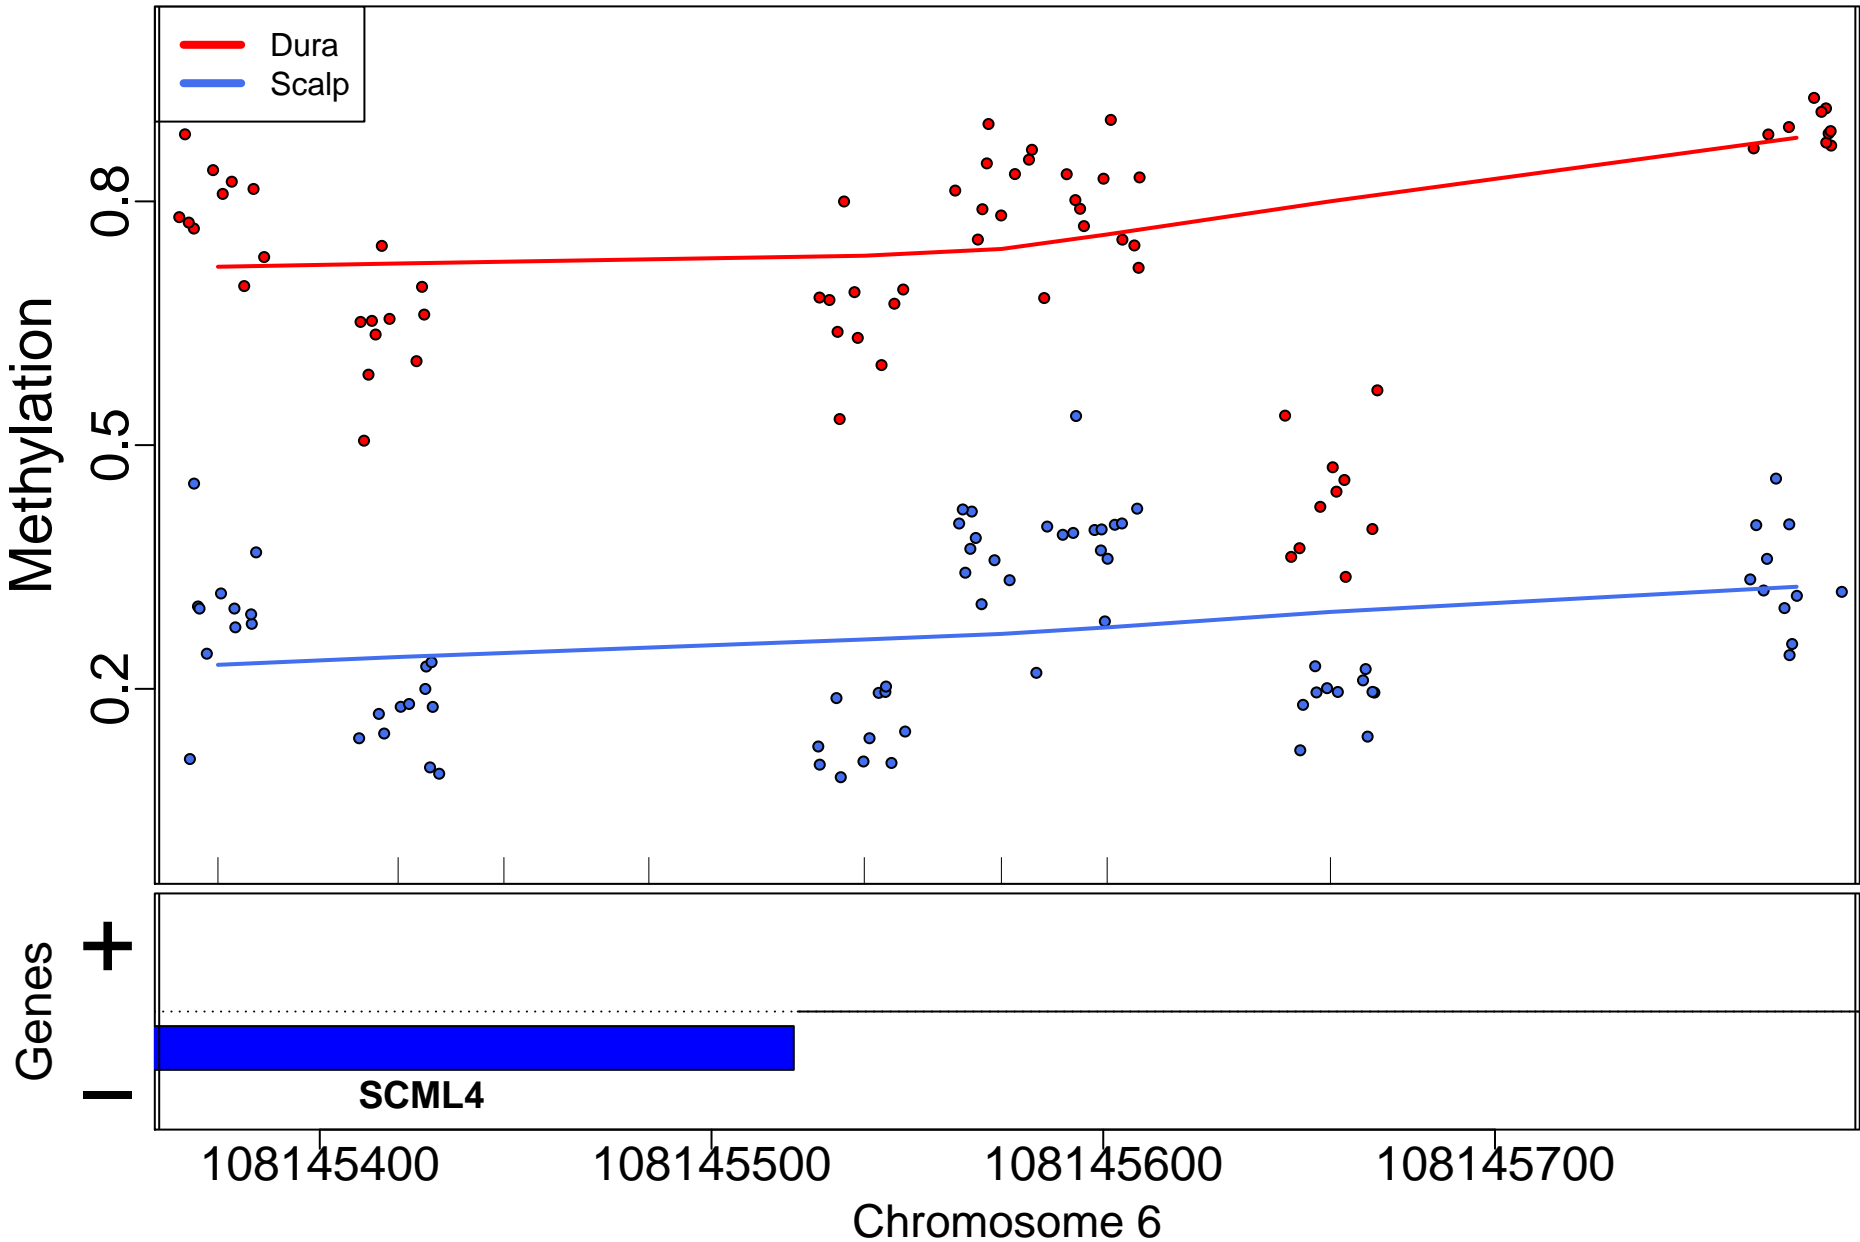

PROX1; 1668bp from tss:promoter

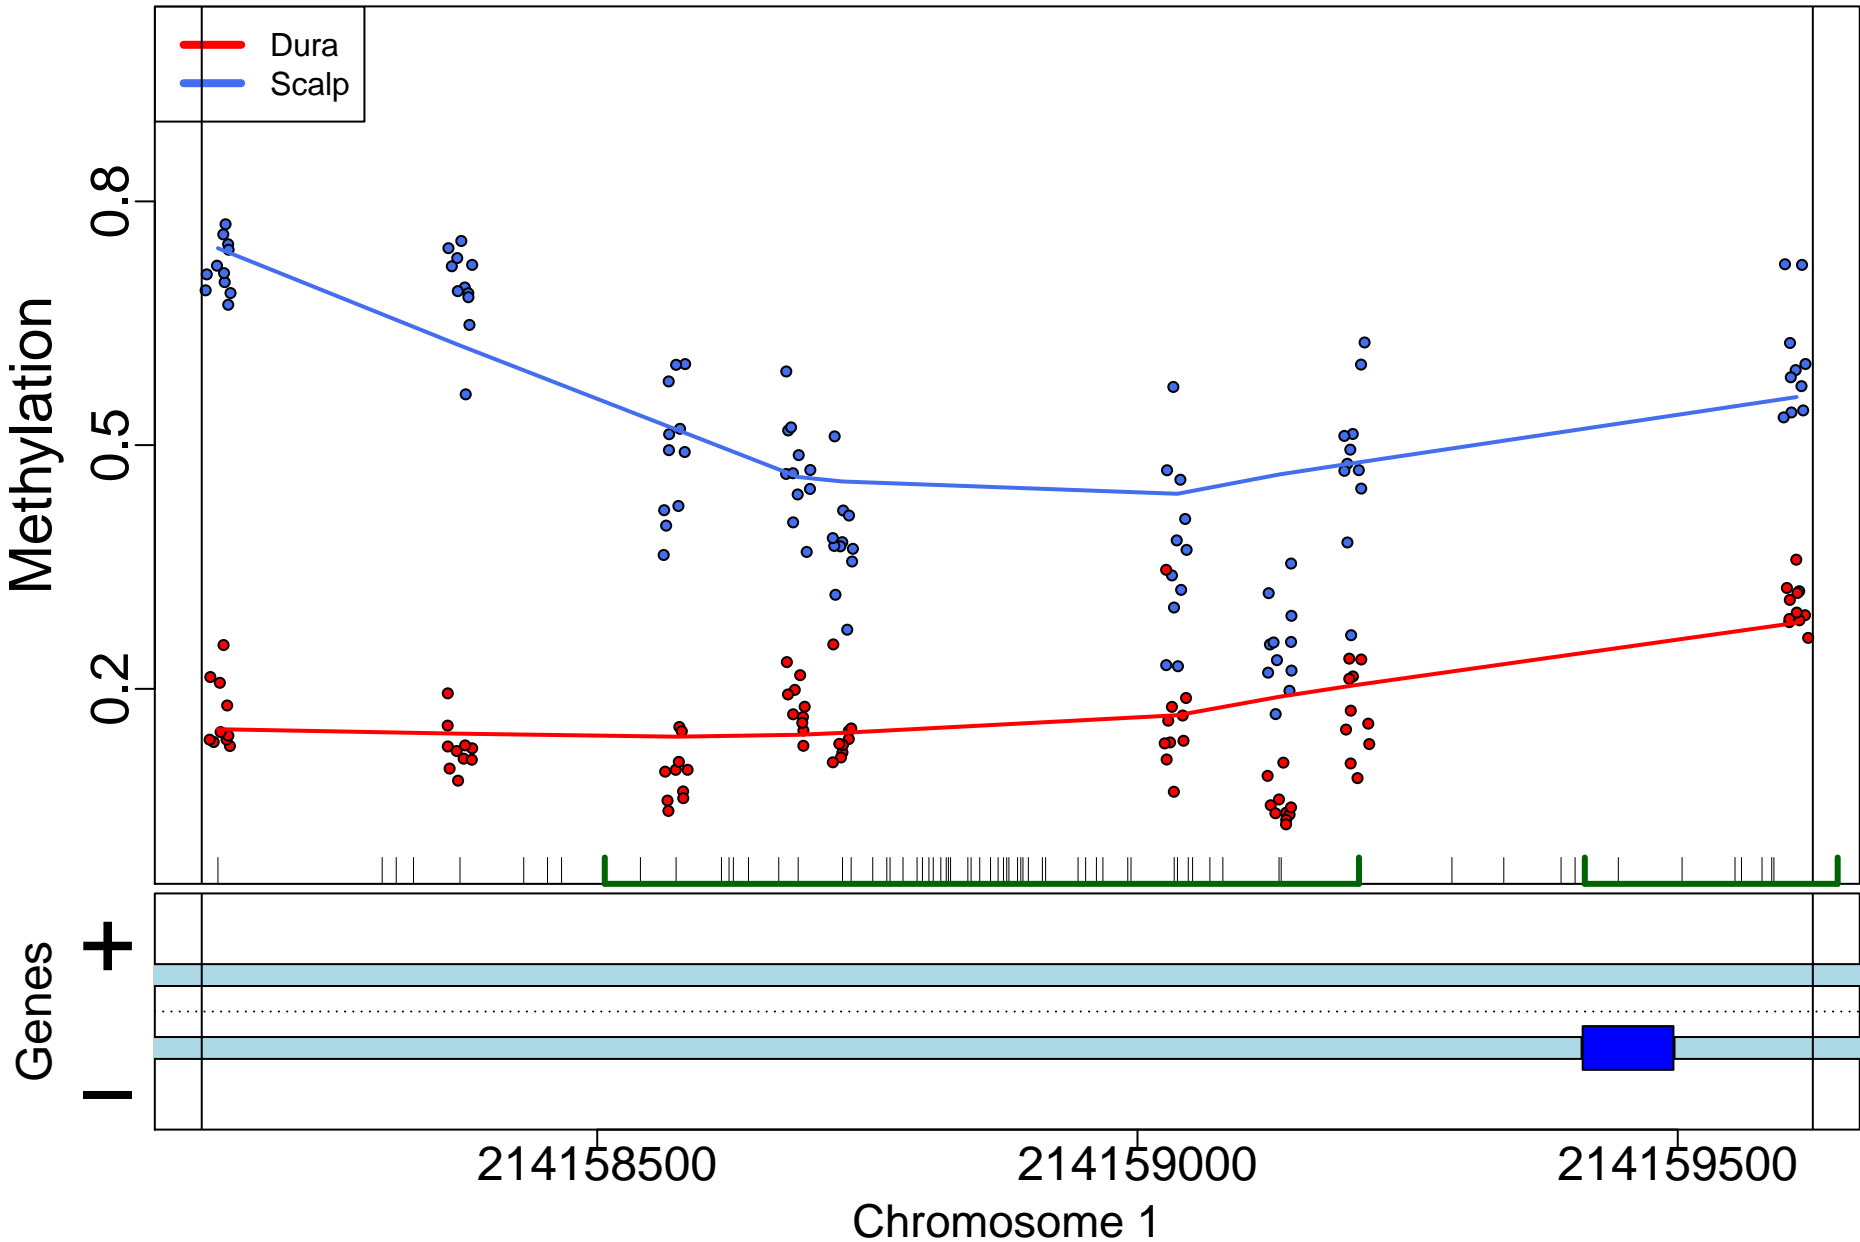



## LINC01124; 1696bp from tss:overlaps 3'

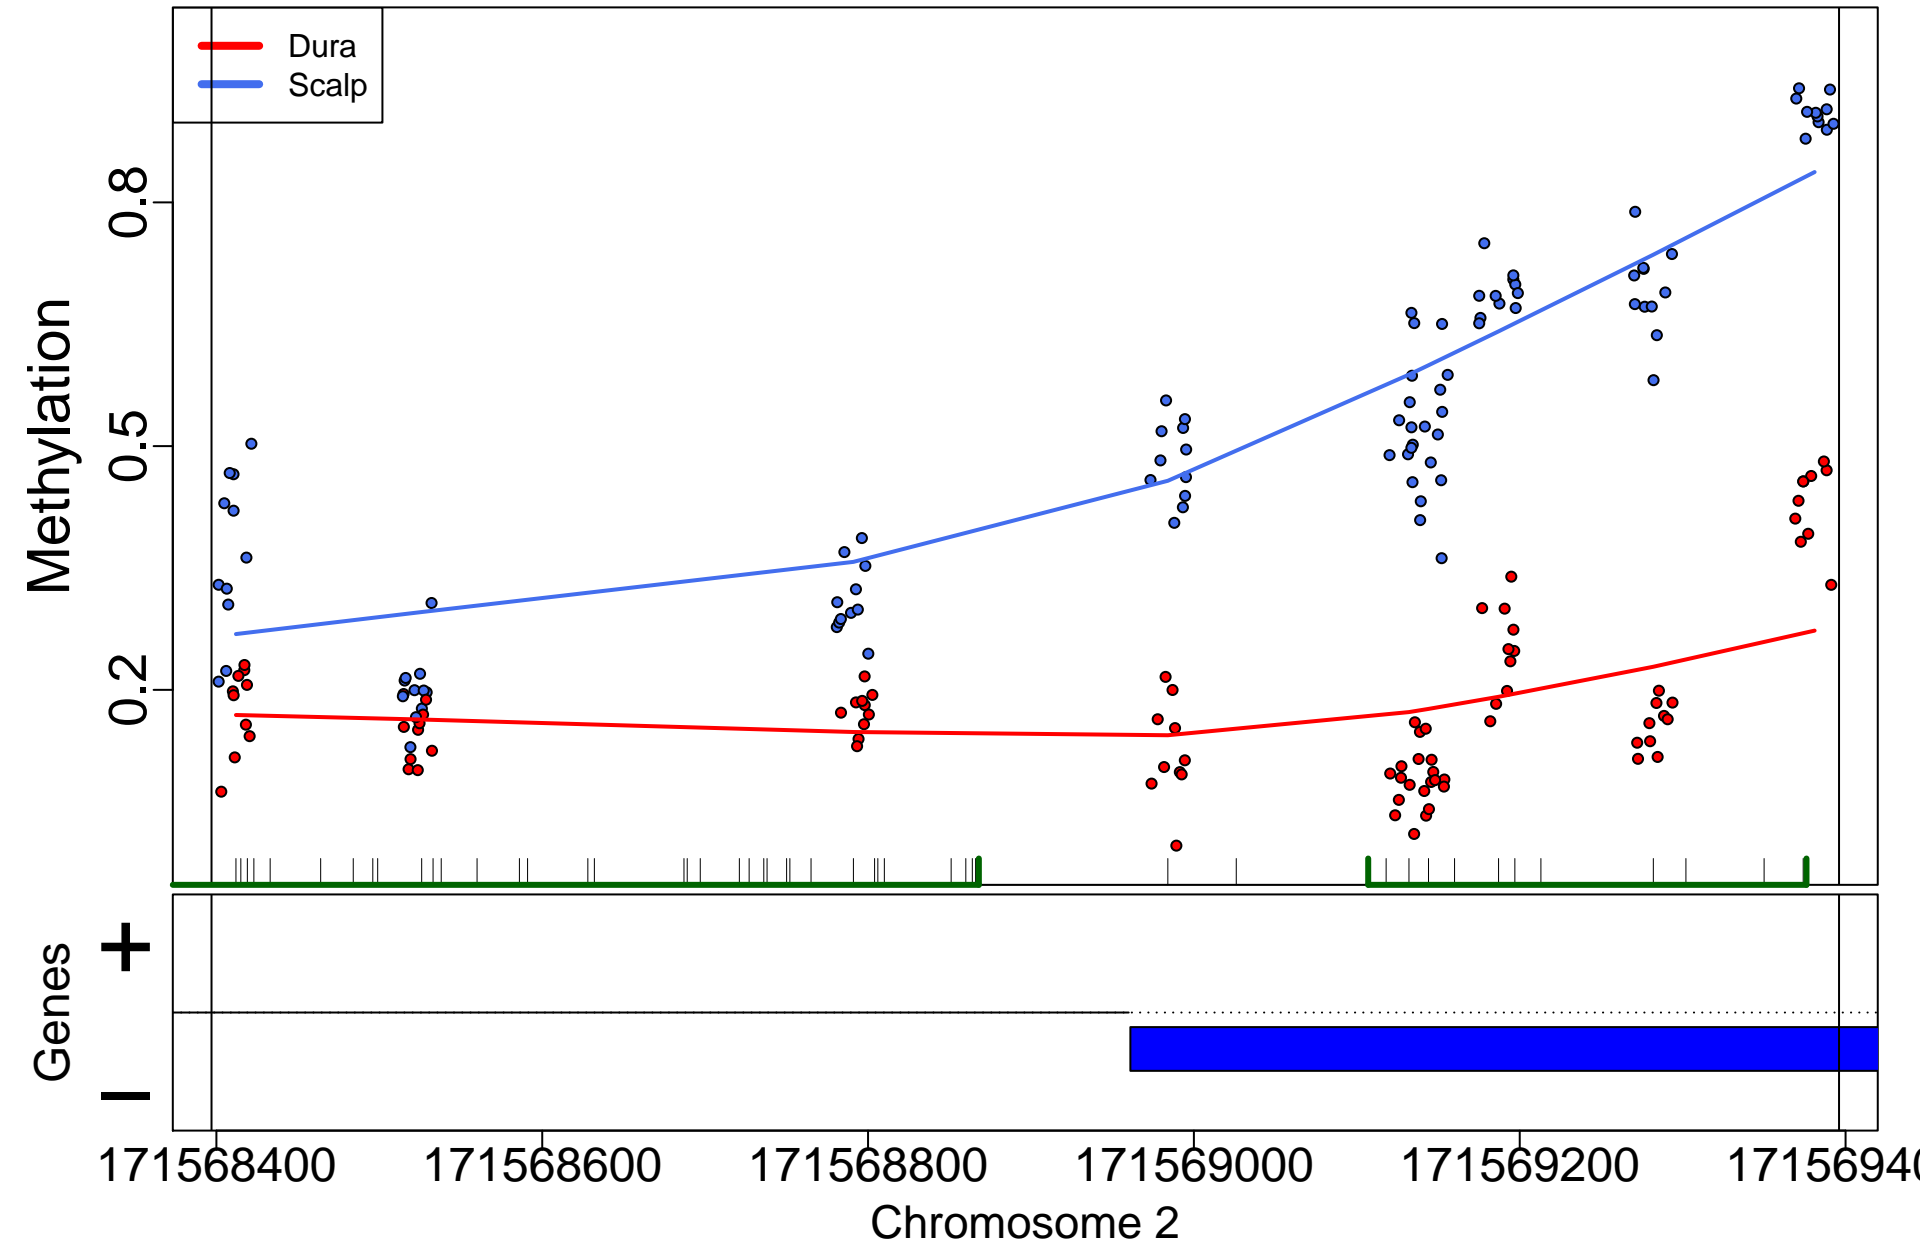

## HAND2; 27622bp from tss:downstream

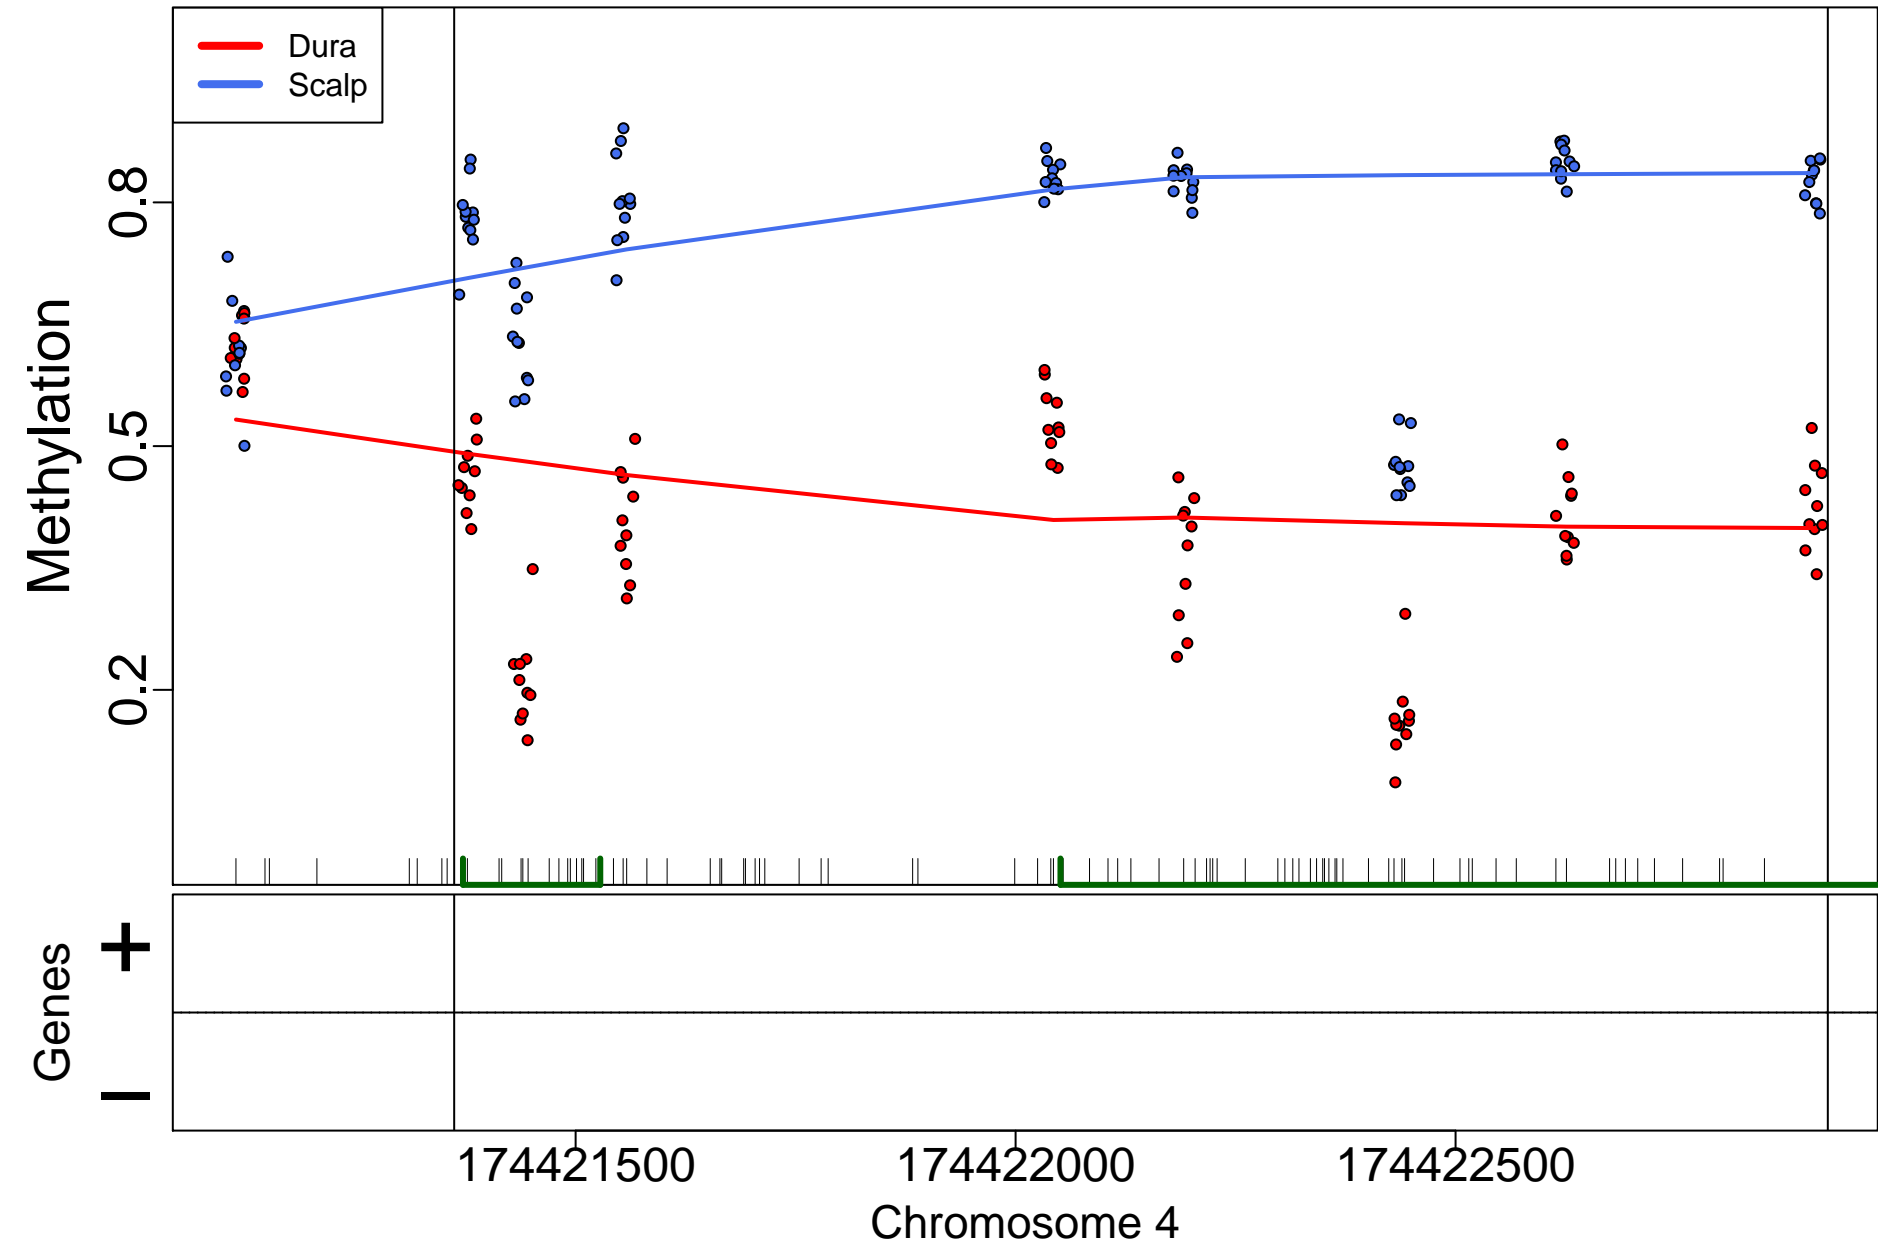

PRDM16; 290671bp from tss:inside intron

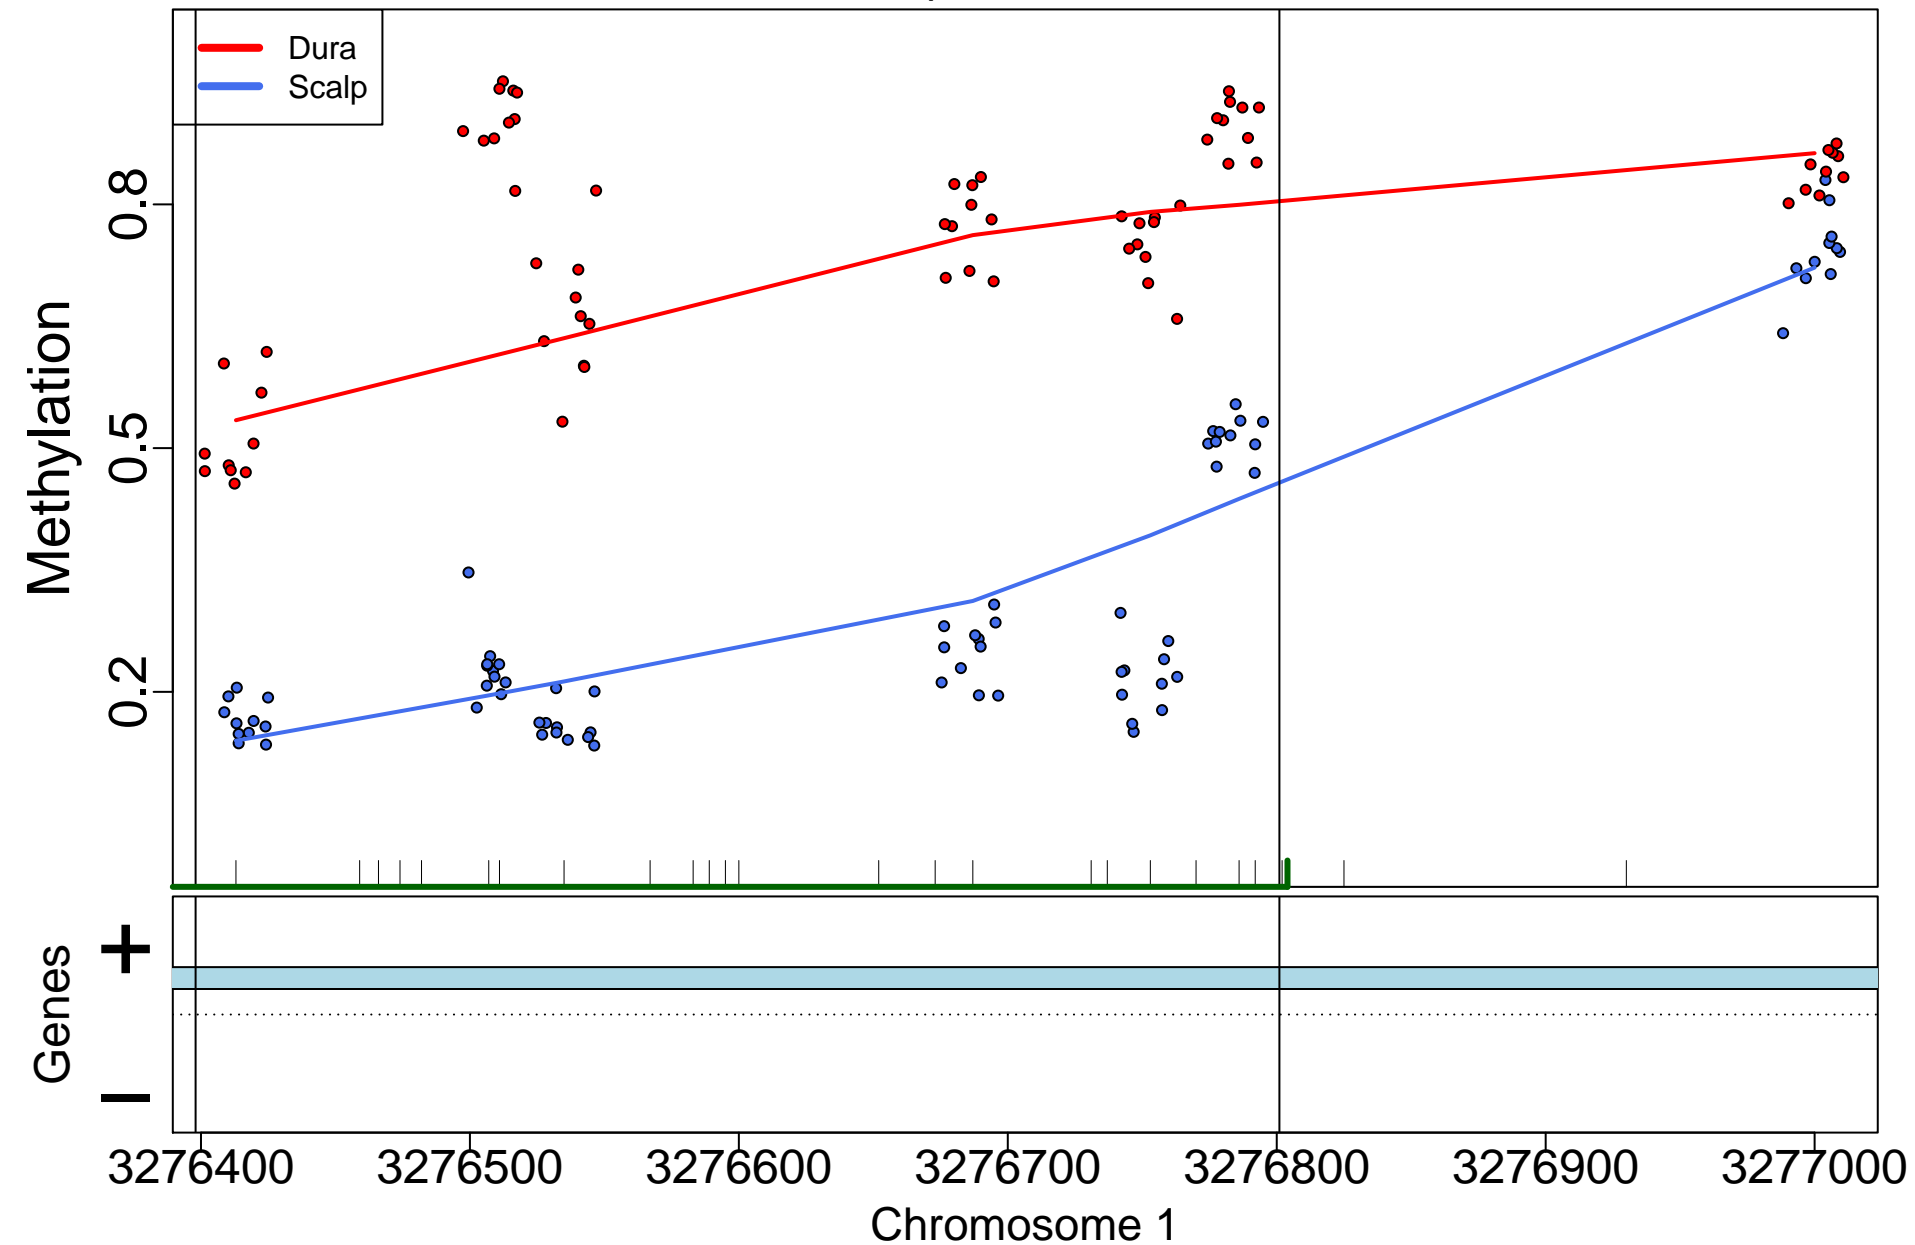

# HAND2; 22339bp from tss:downstream

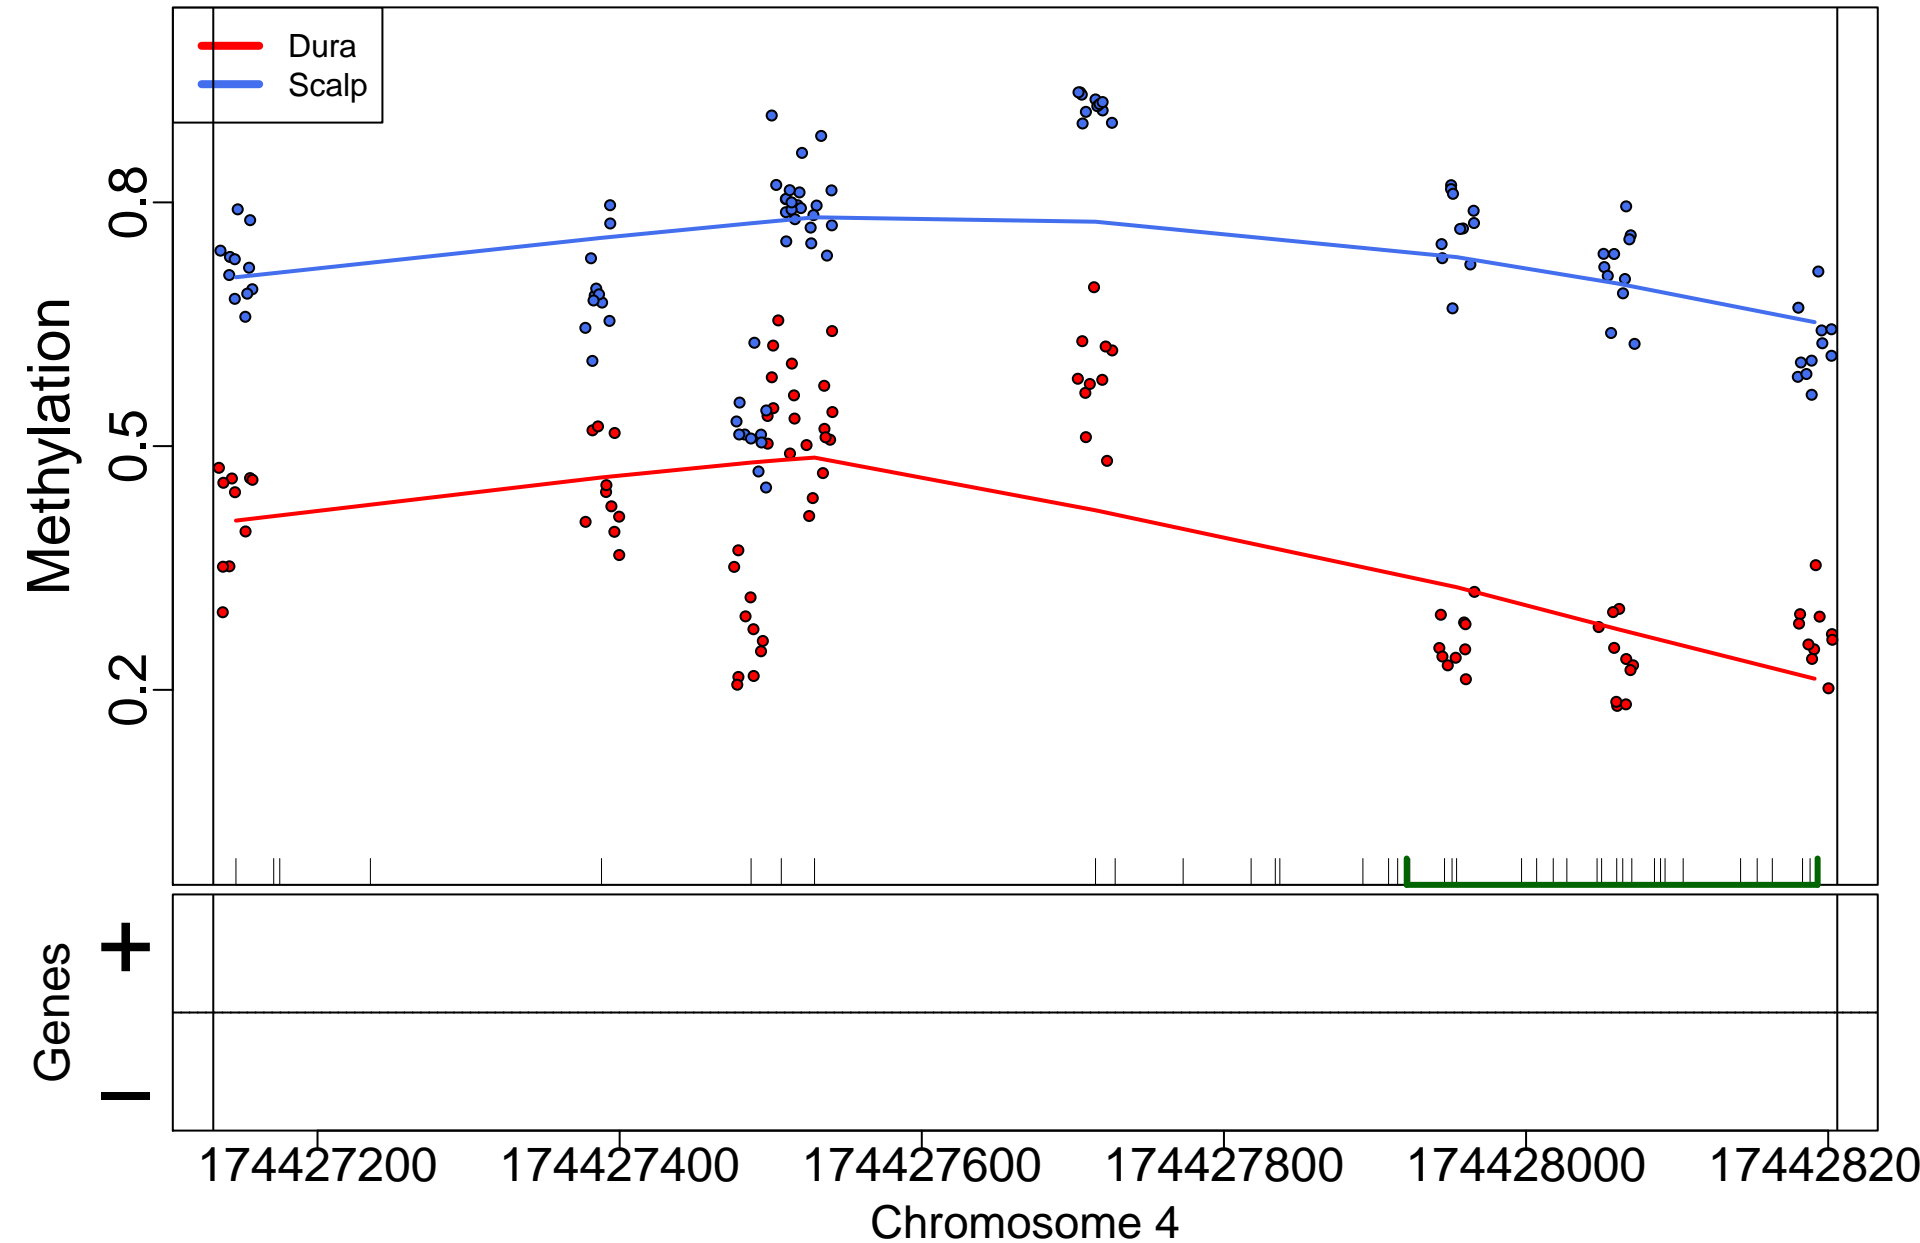

TMEM174; 59088bp from tss:downstream

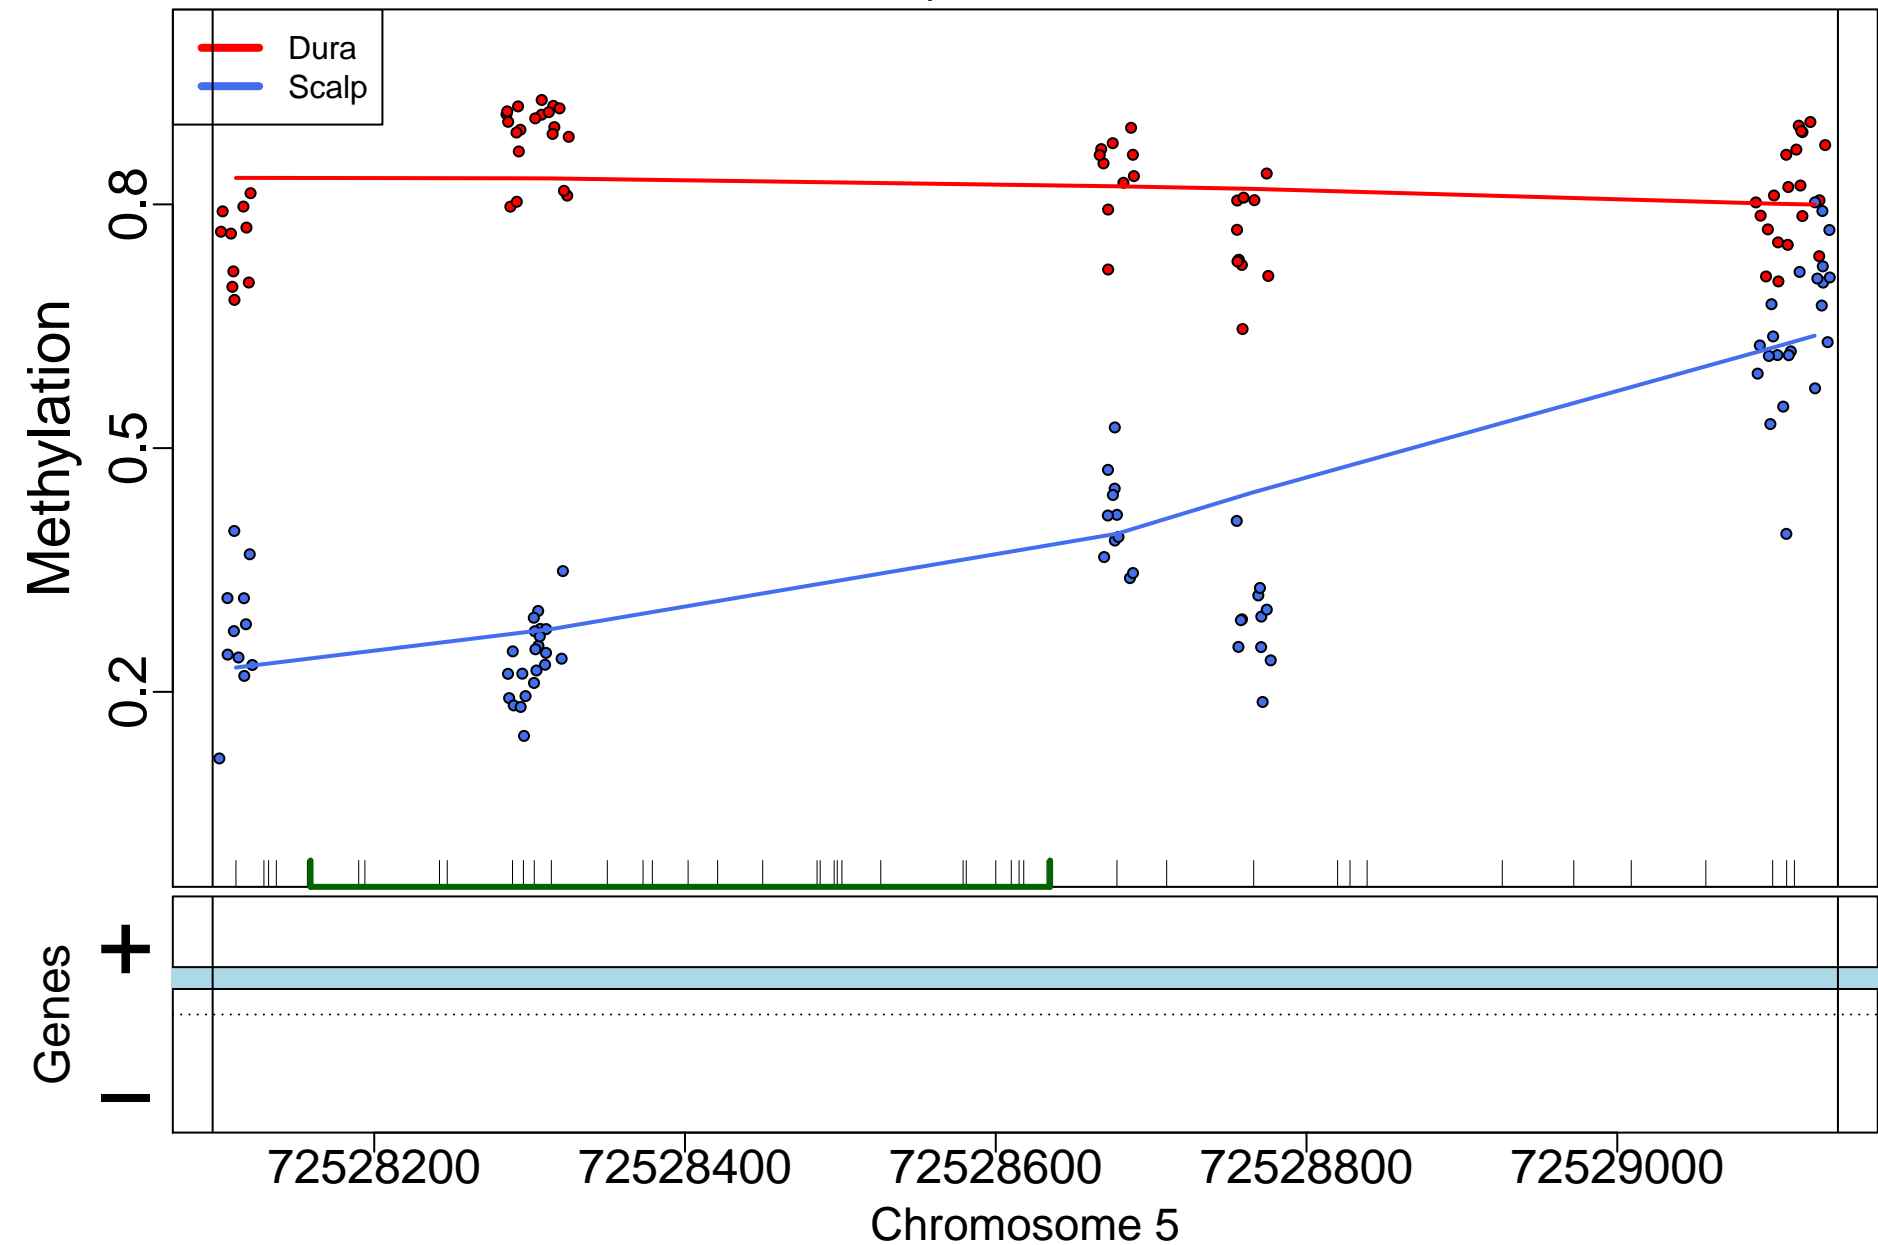

# SAMD11; 0bp from tss:NA

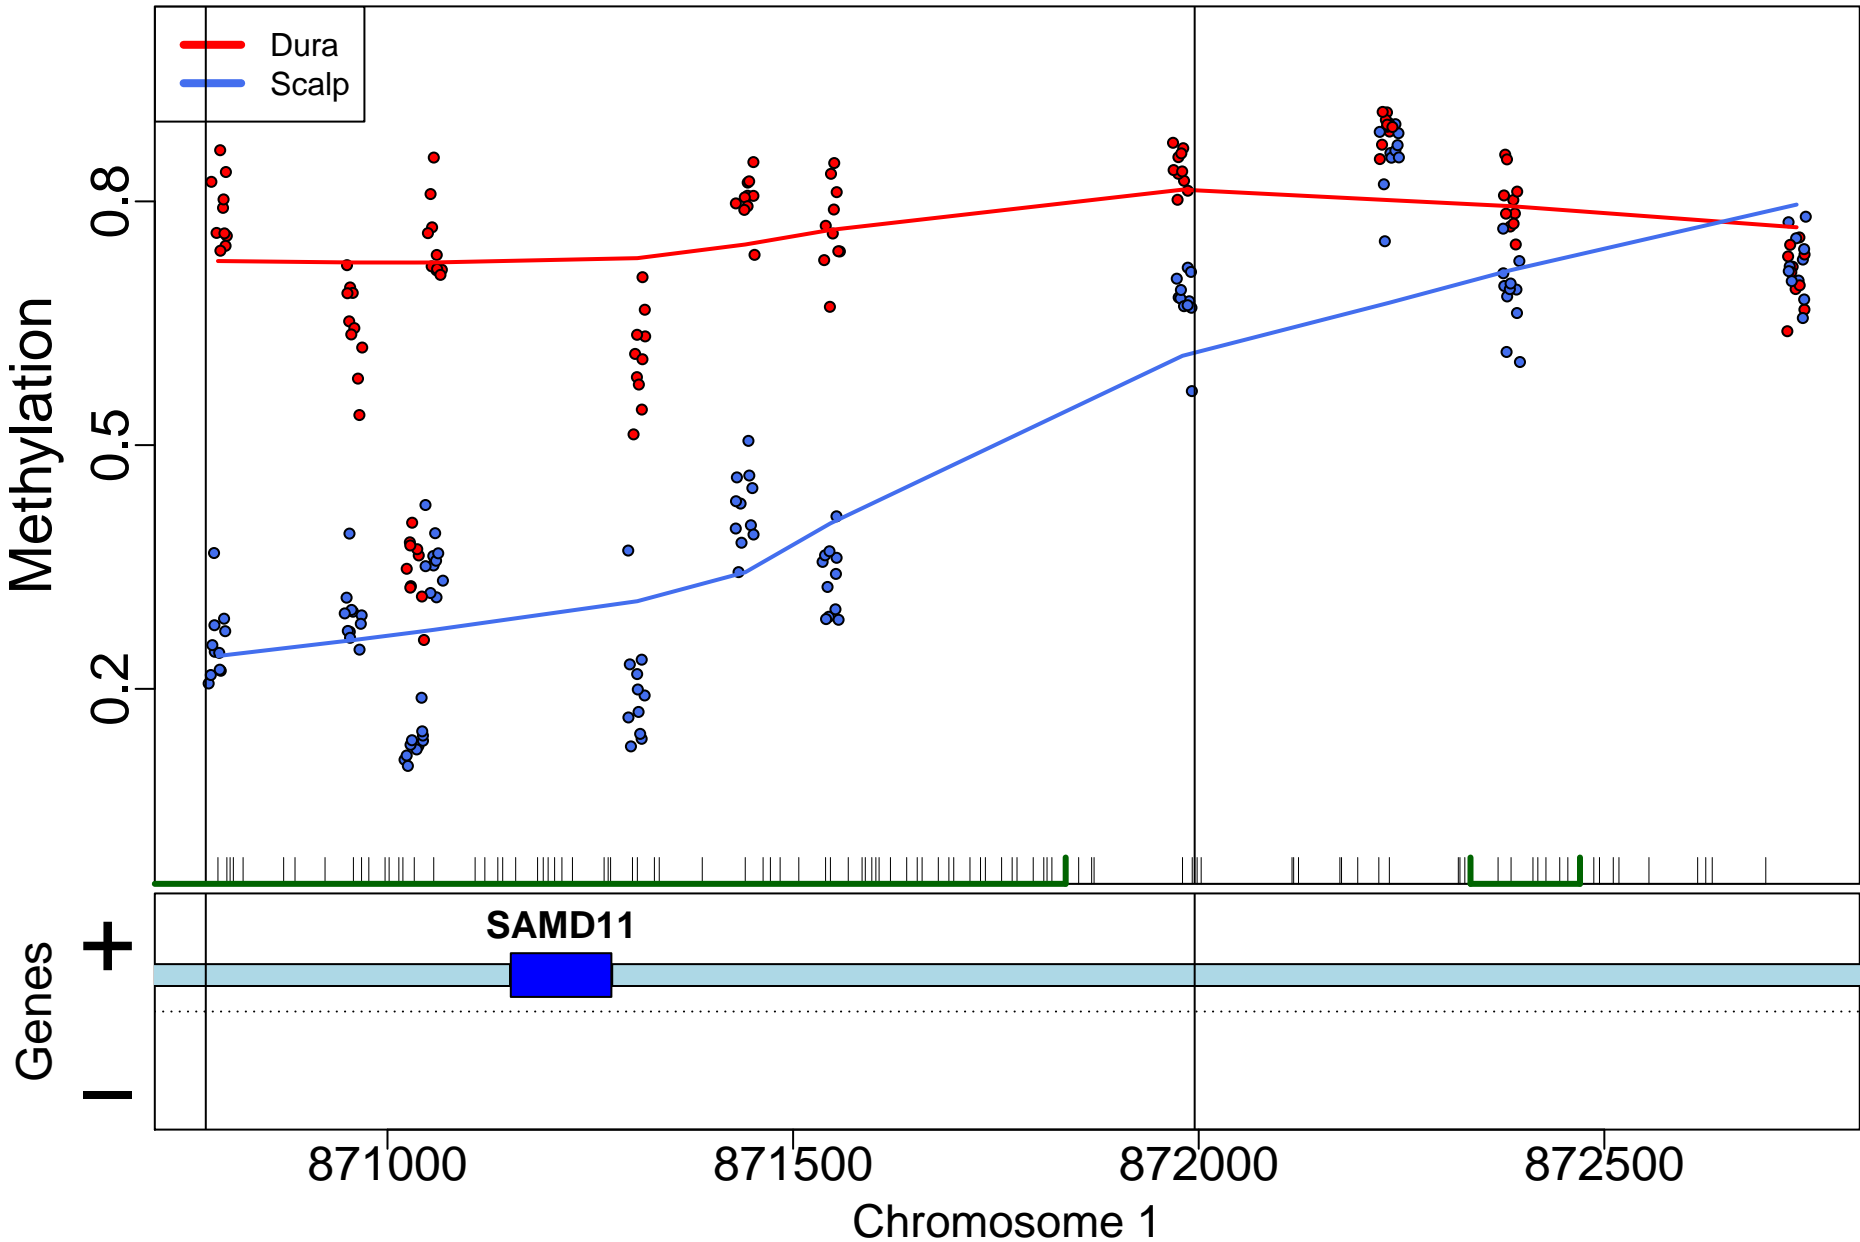

LOC145845; 0bp from tss:NA

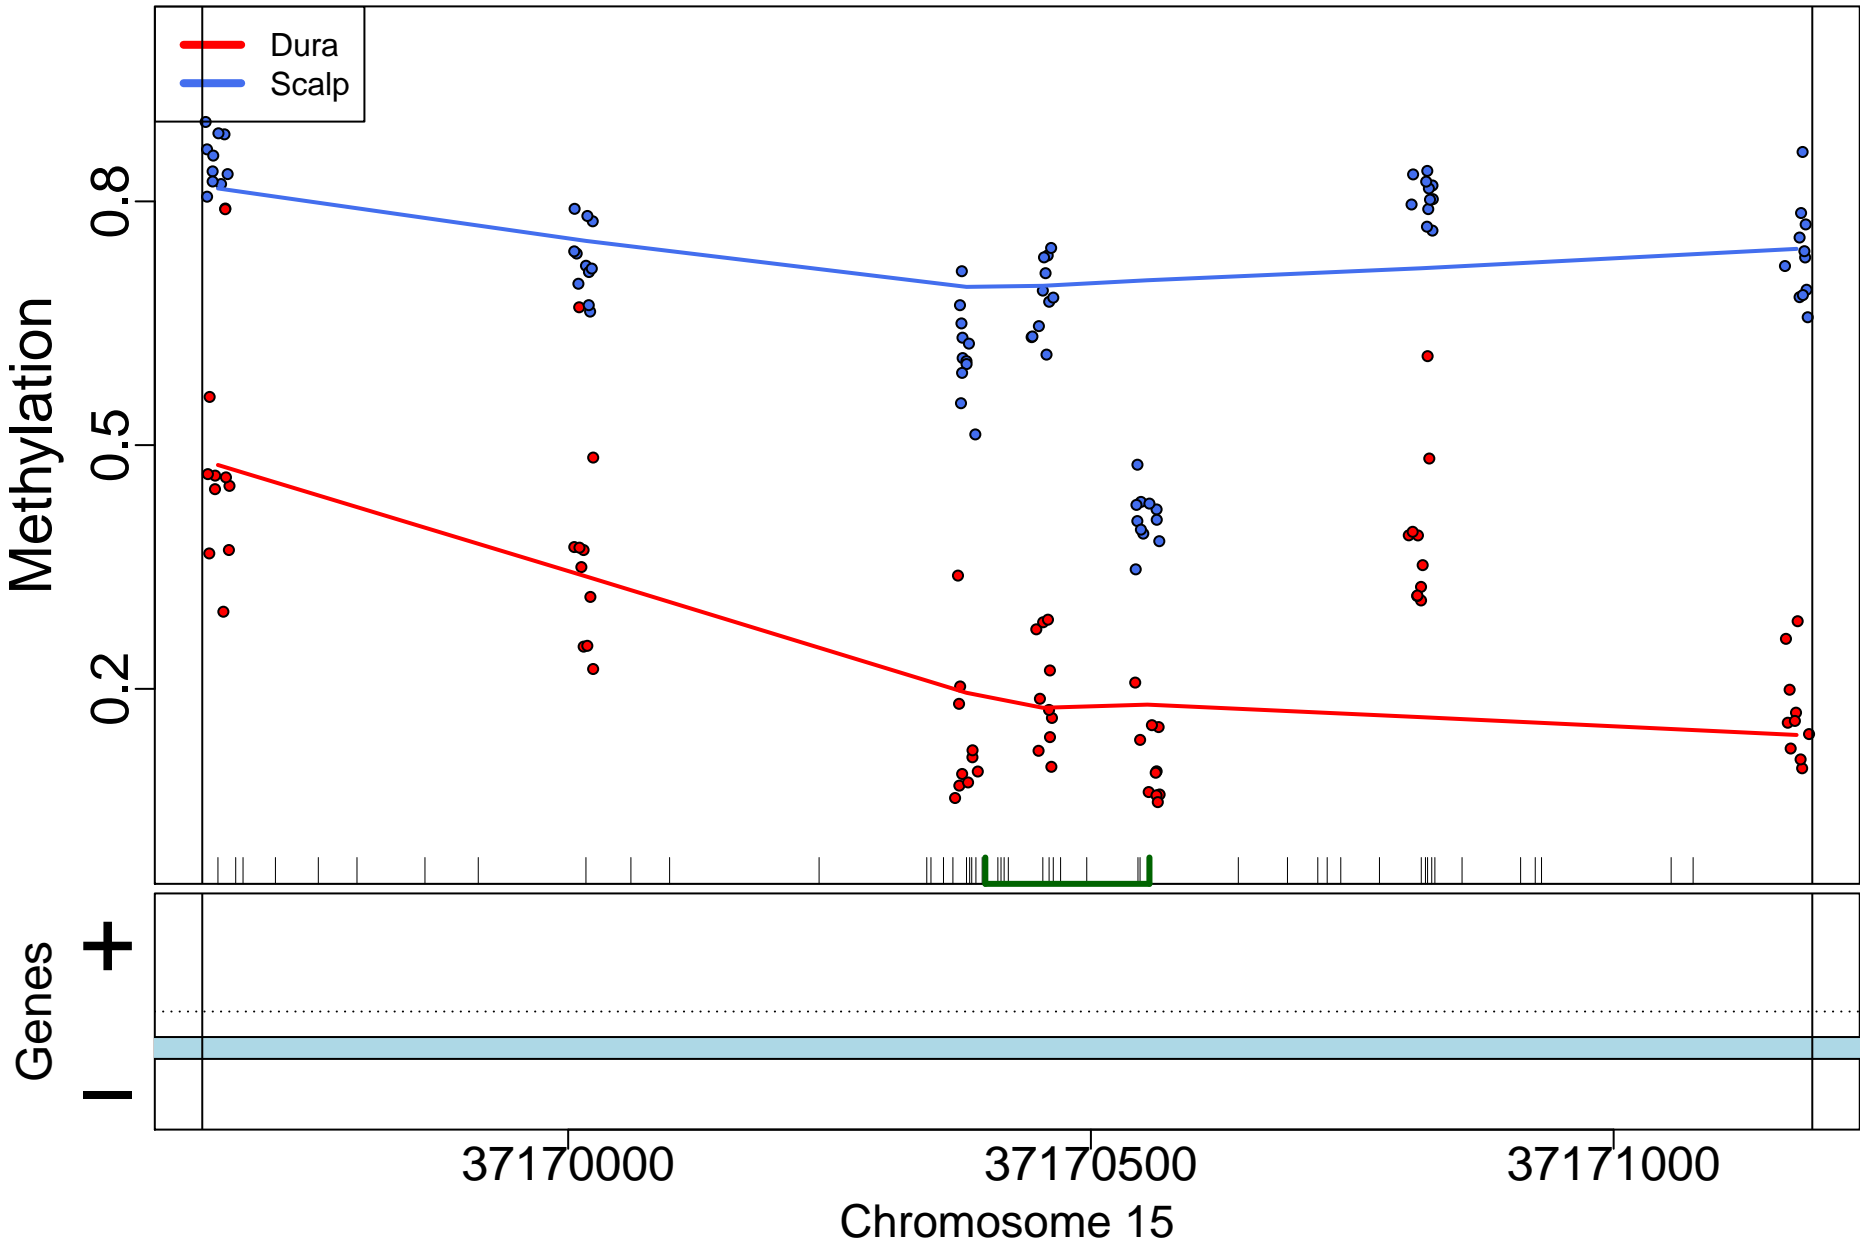

GMDS; 556088bp from tss:downstream

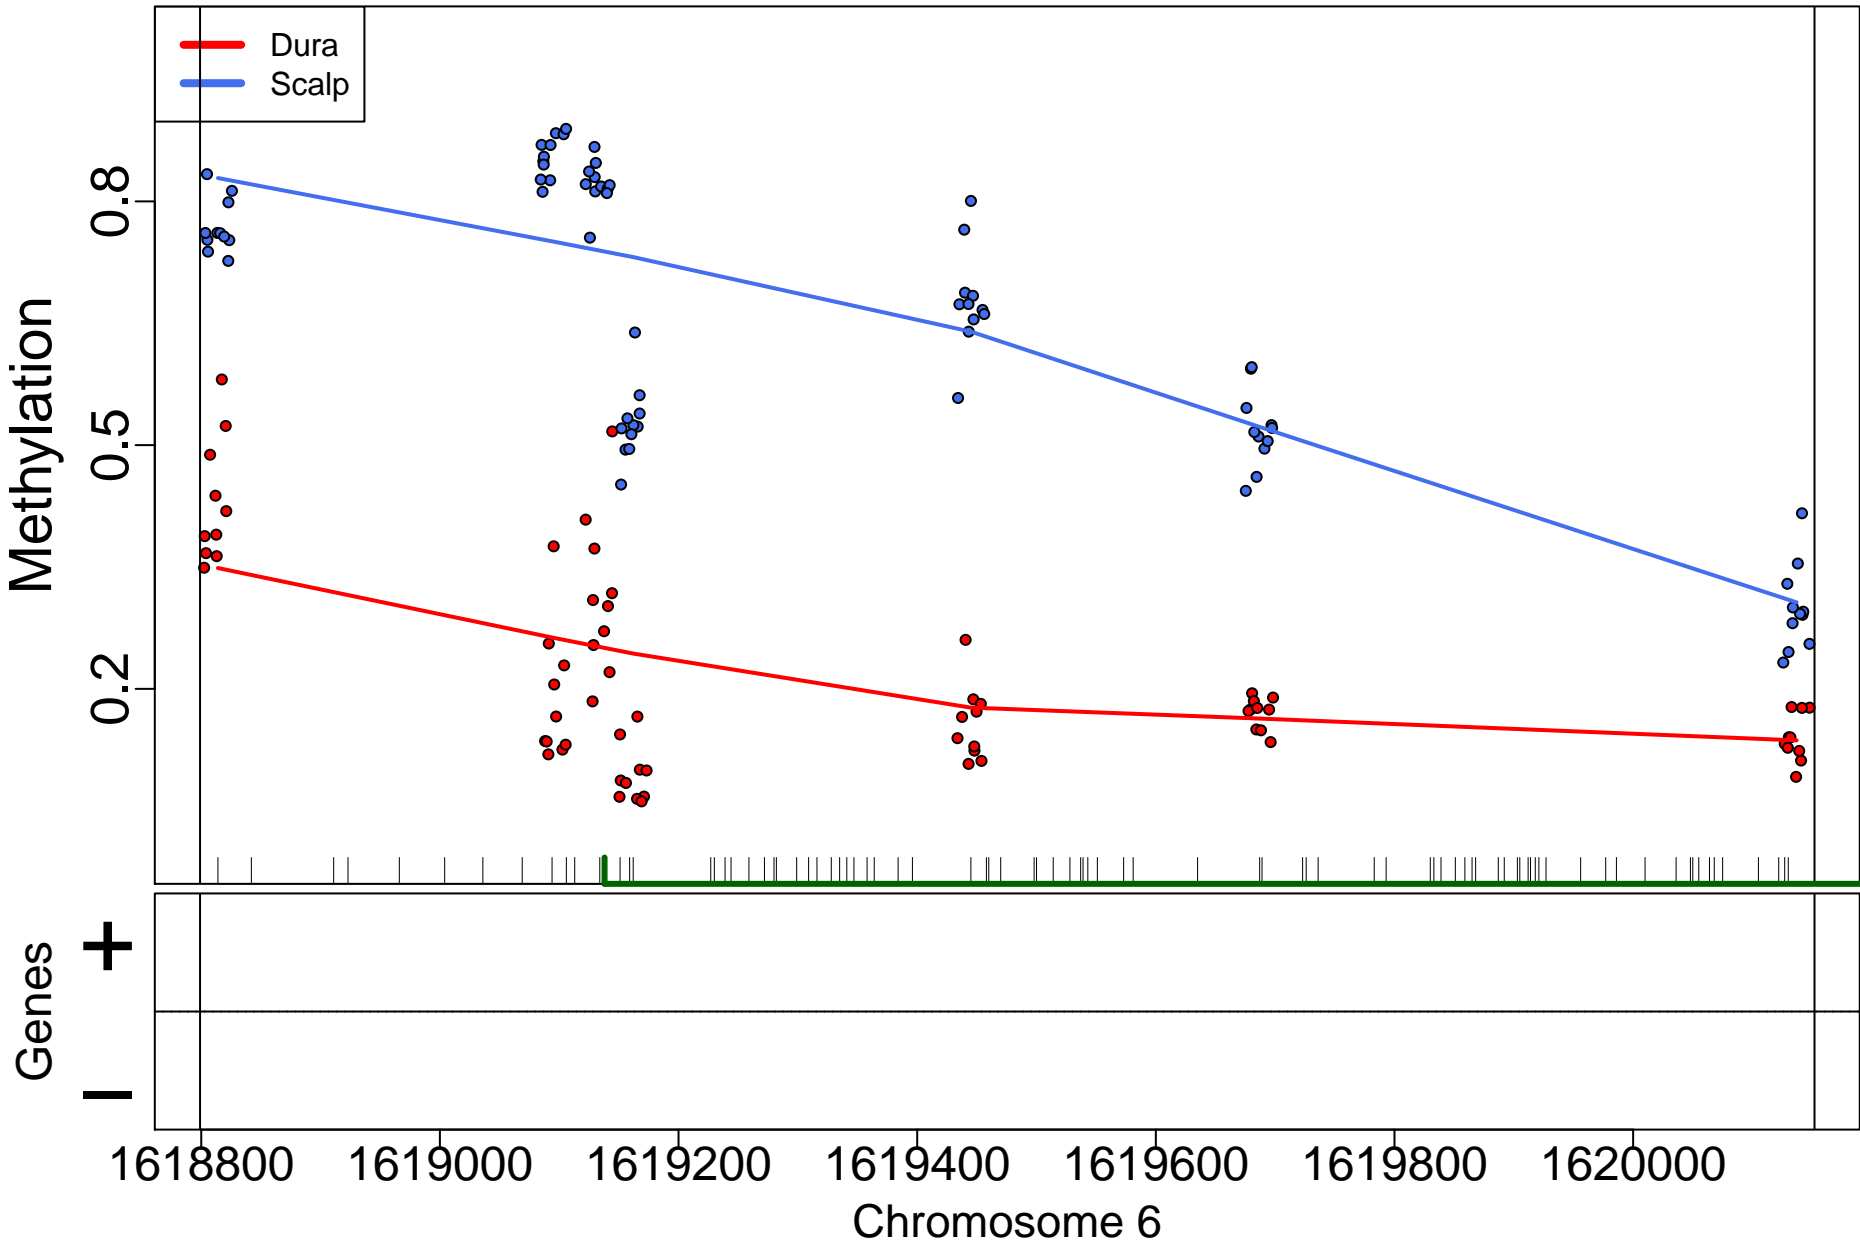



GLI3; 8546bp from tss:inside intron

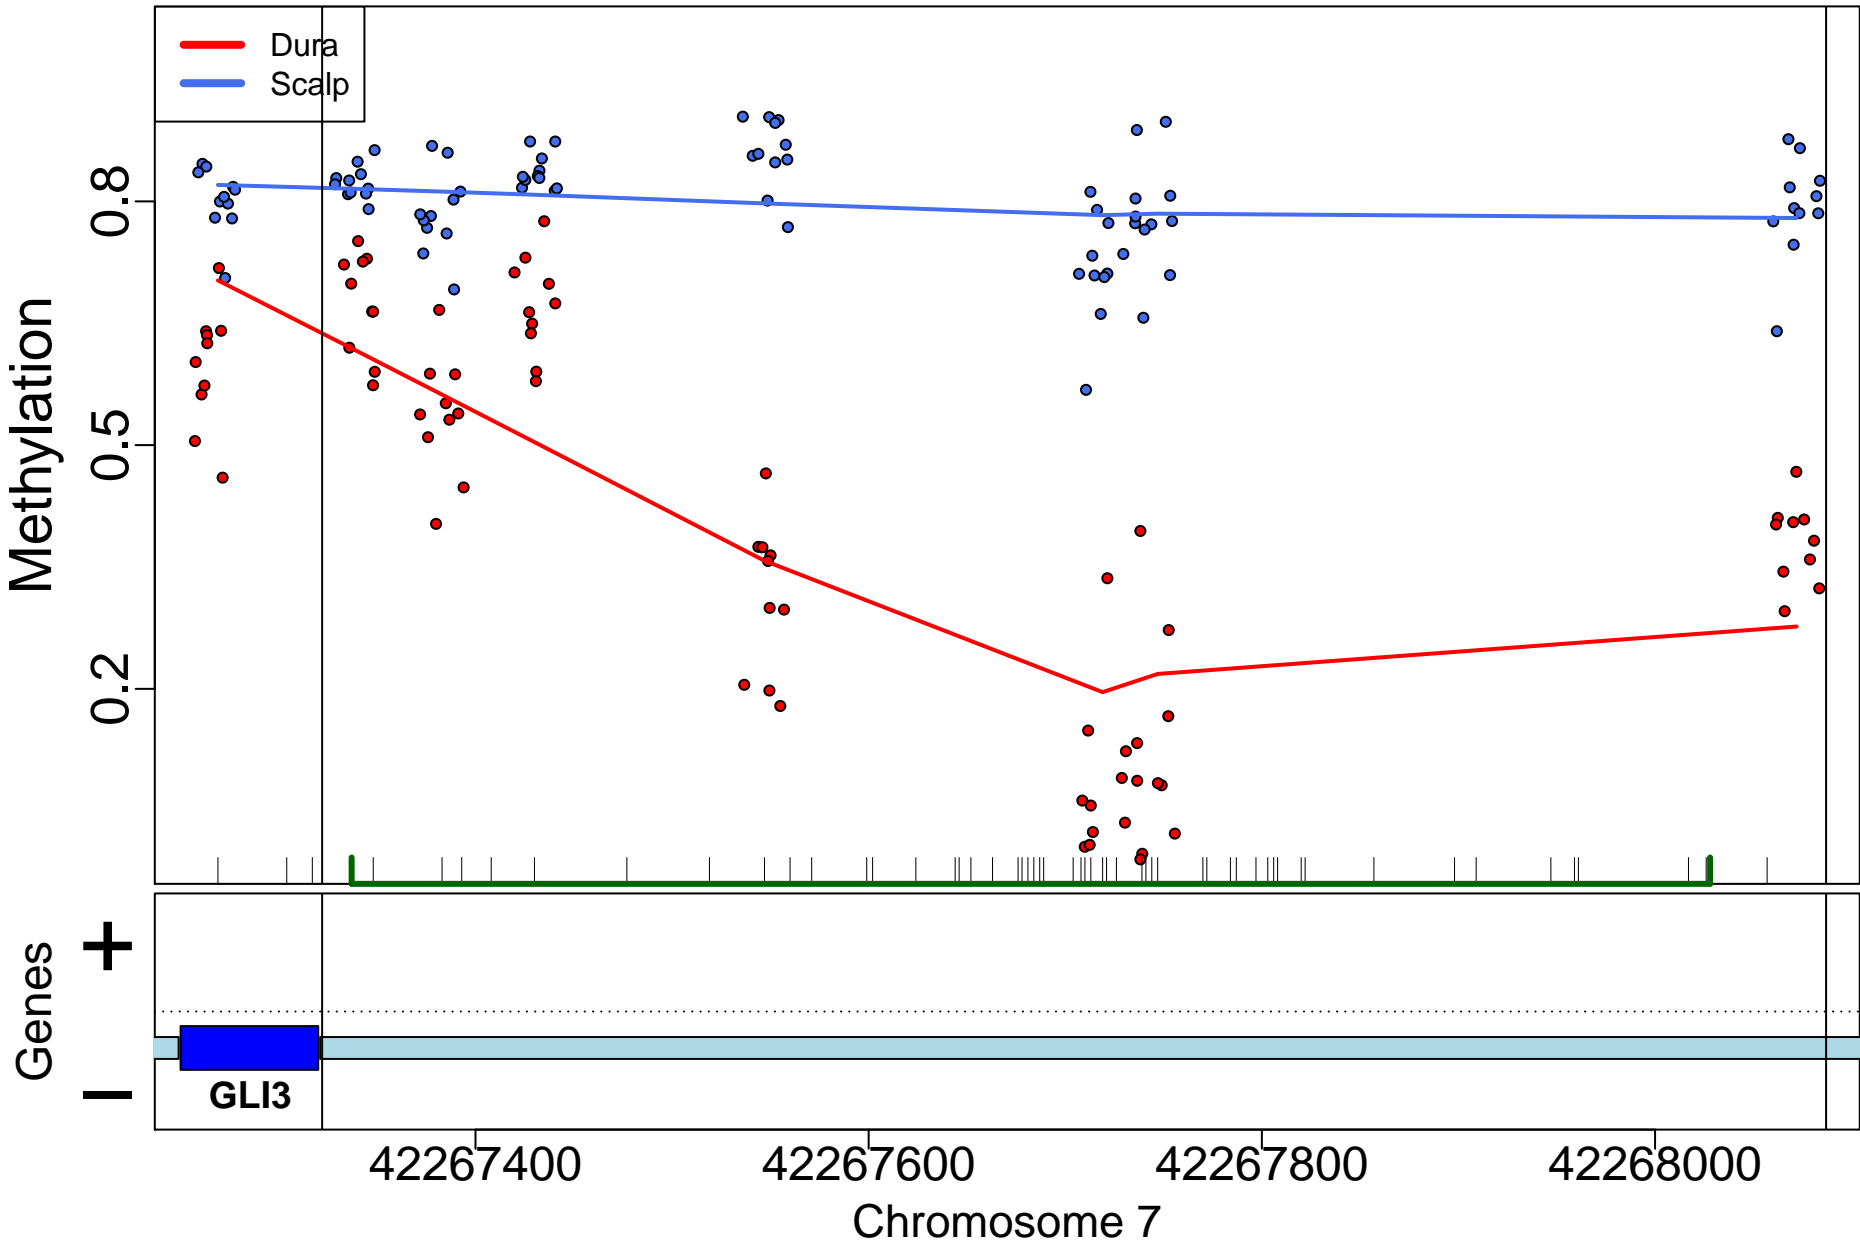

## EMX2; 3139bp from tss:inside intron

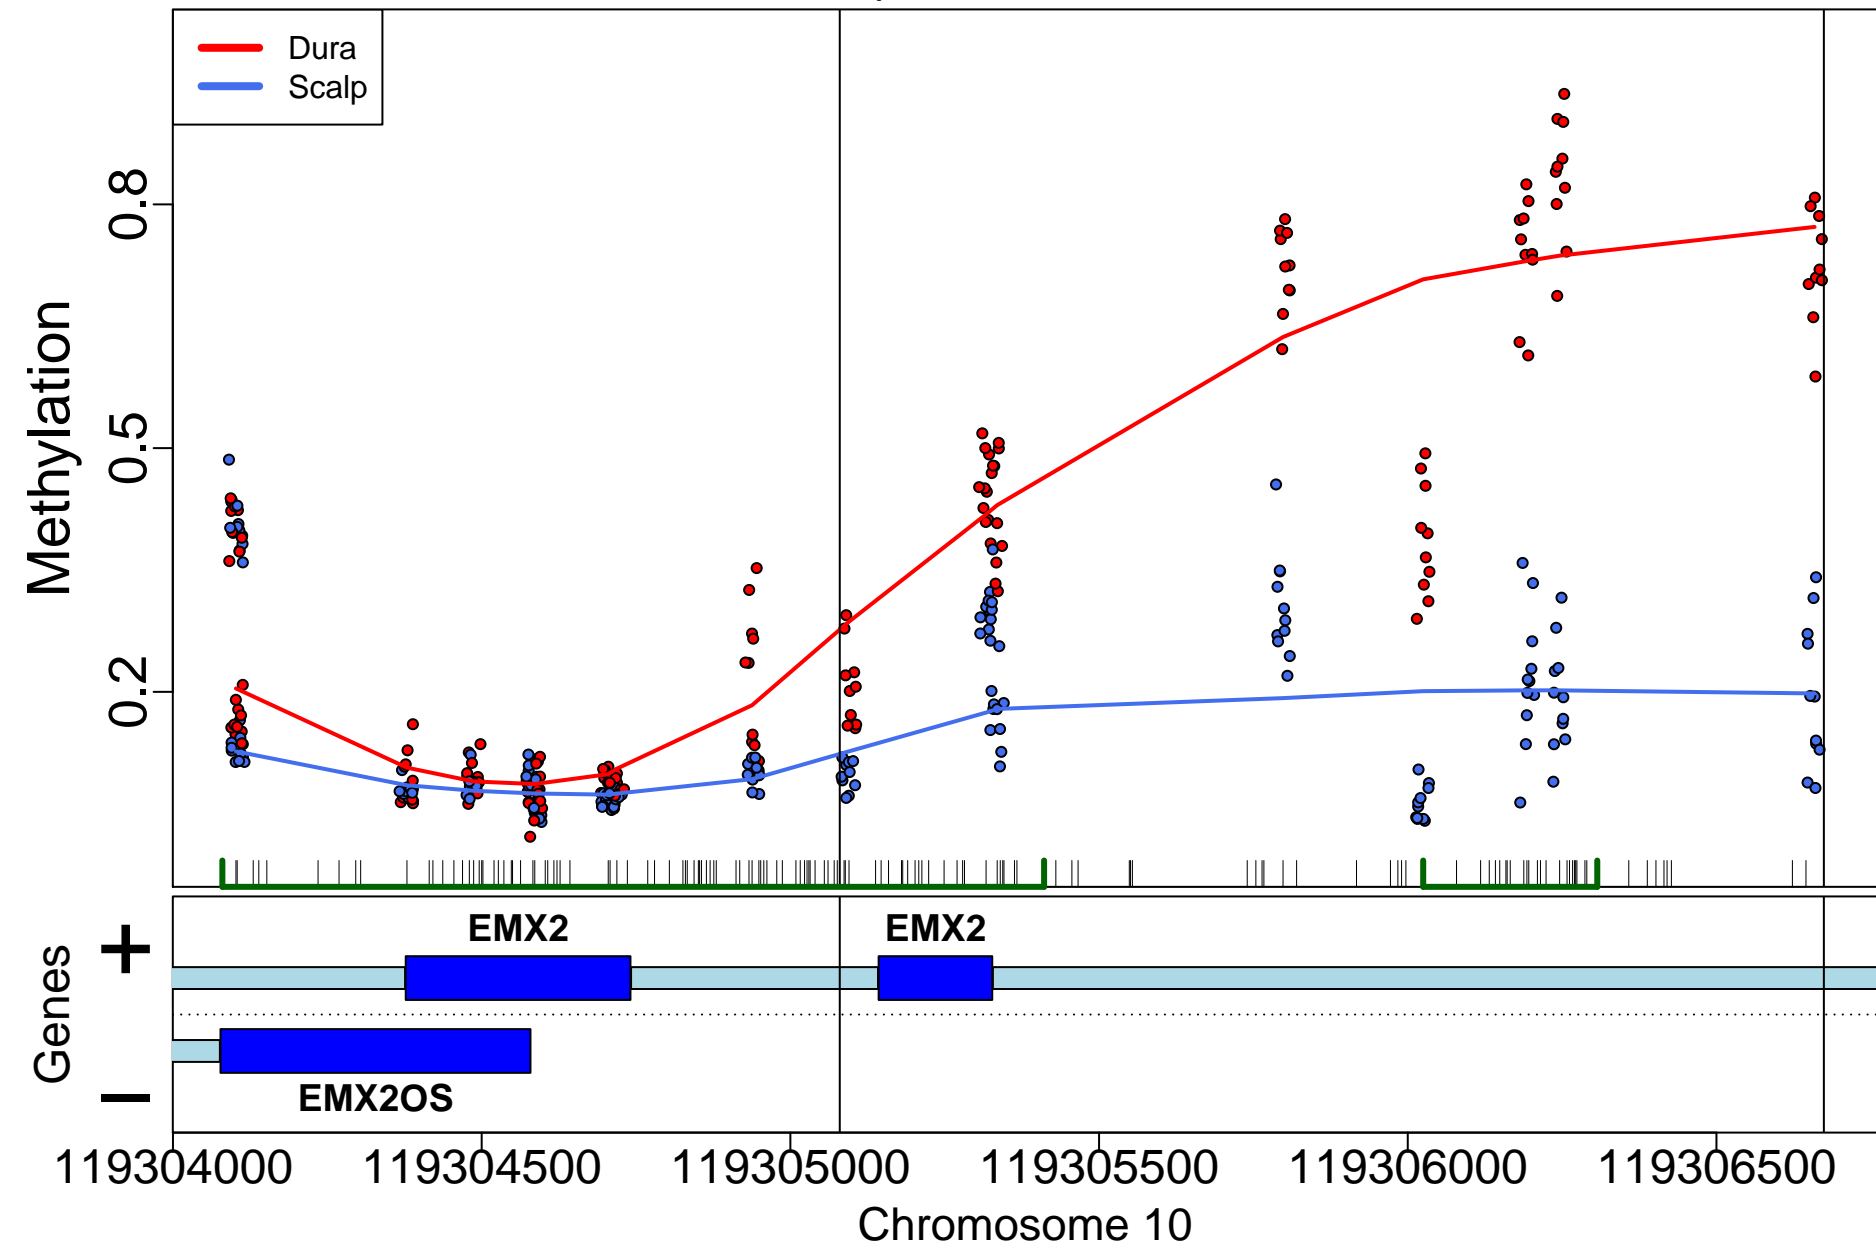

PARVG; 24bp from tss:promoter

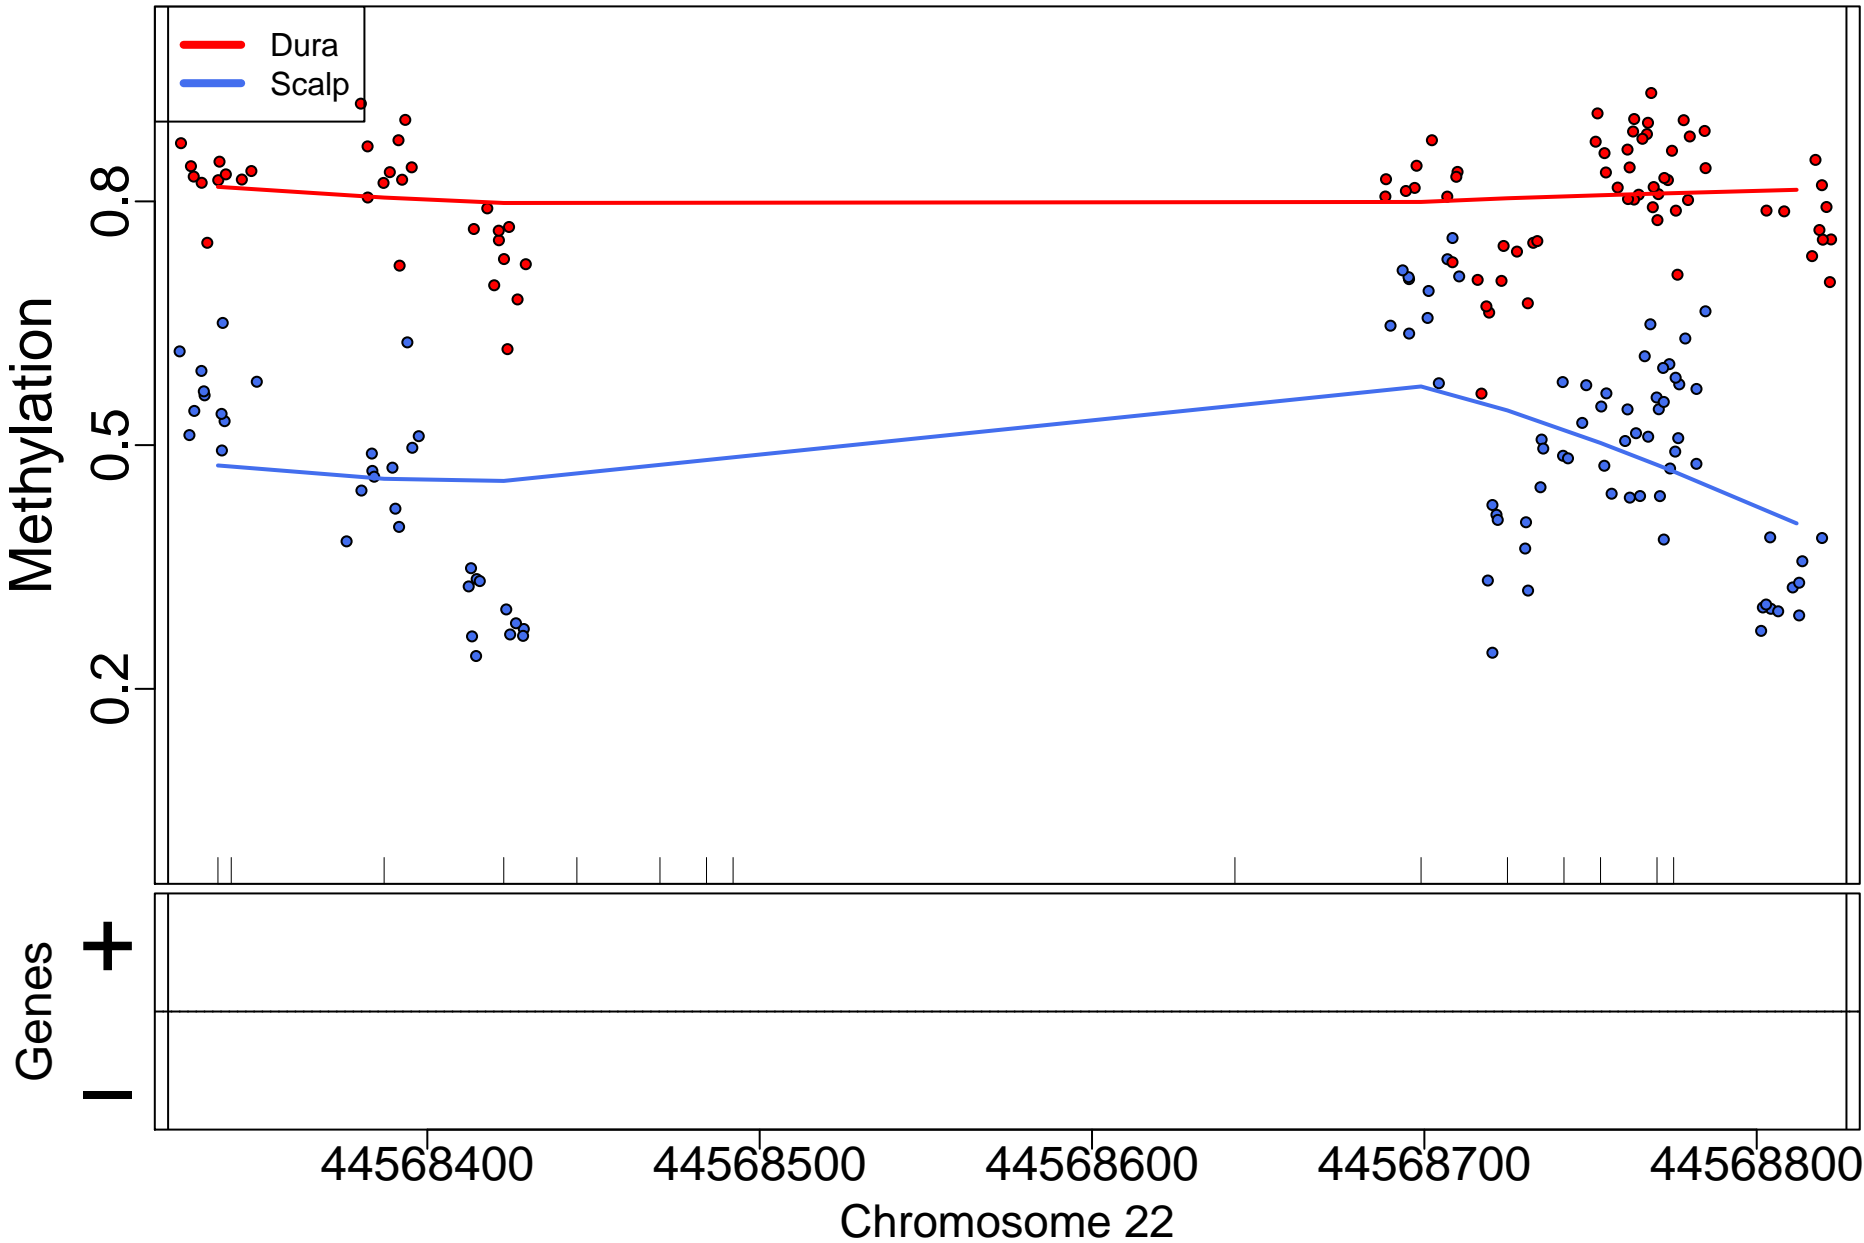

MGMT; 420555bp from tss:upstream

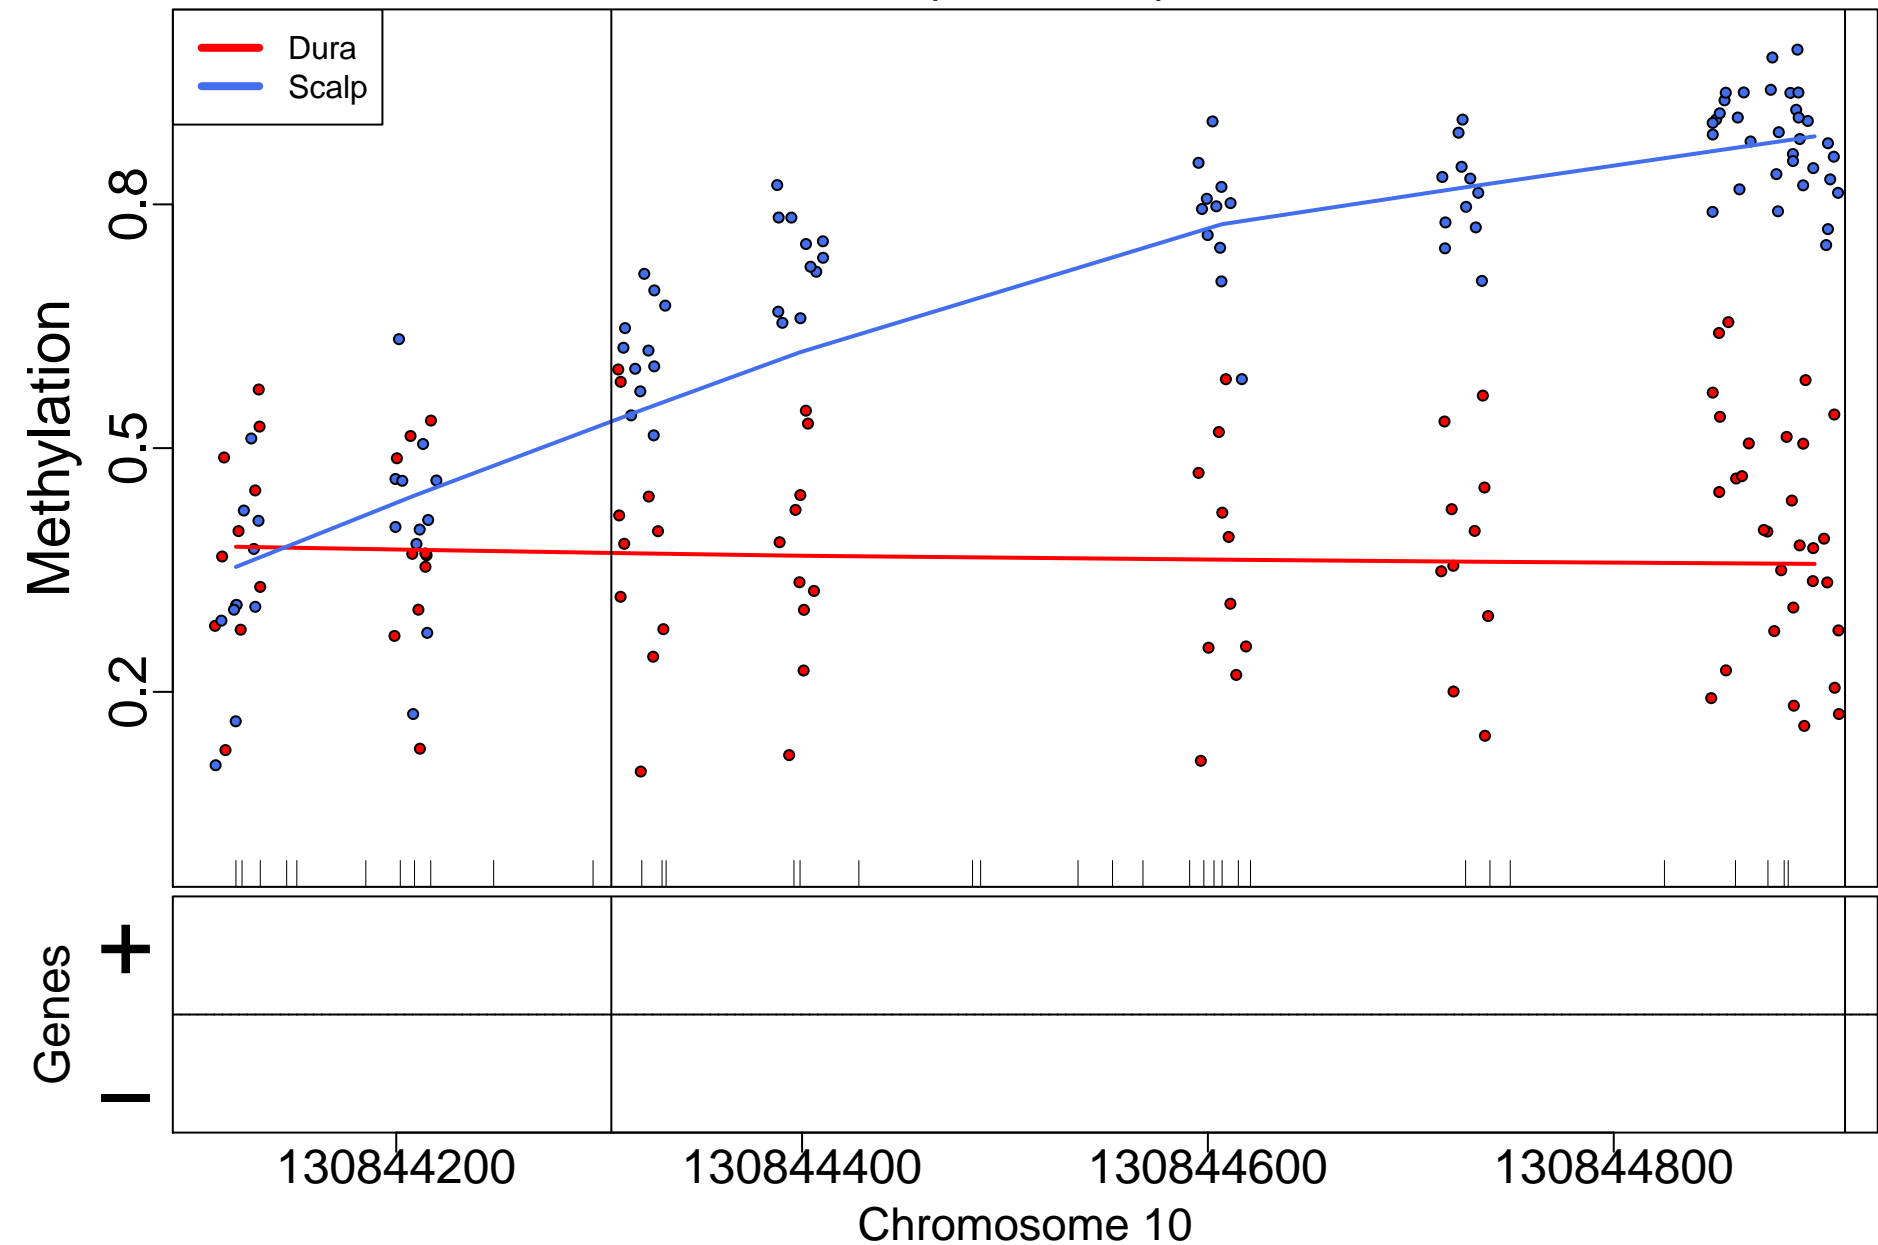

ZFH3; 5369bp from tss:upstream

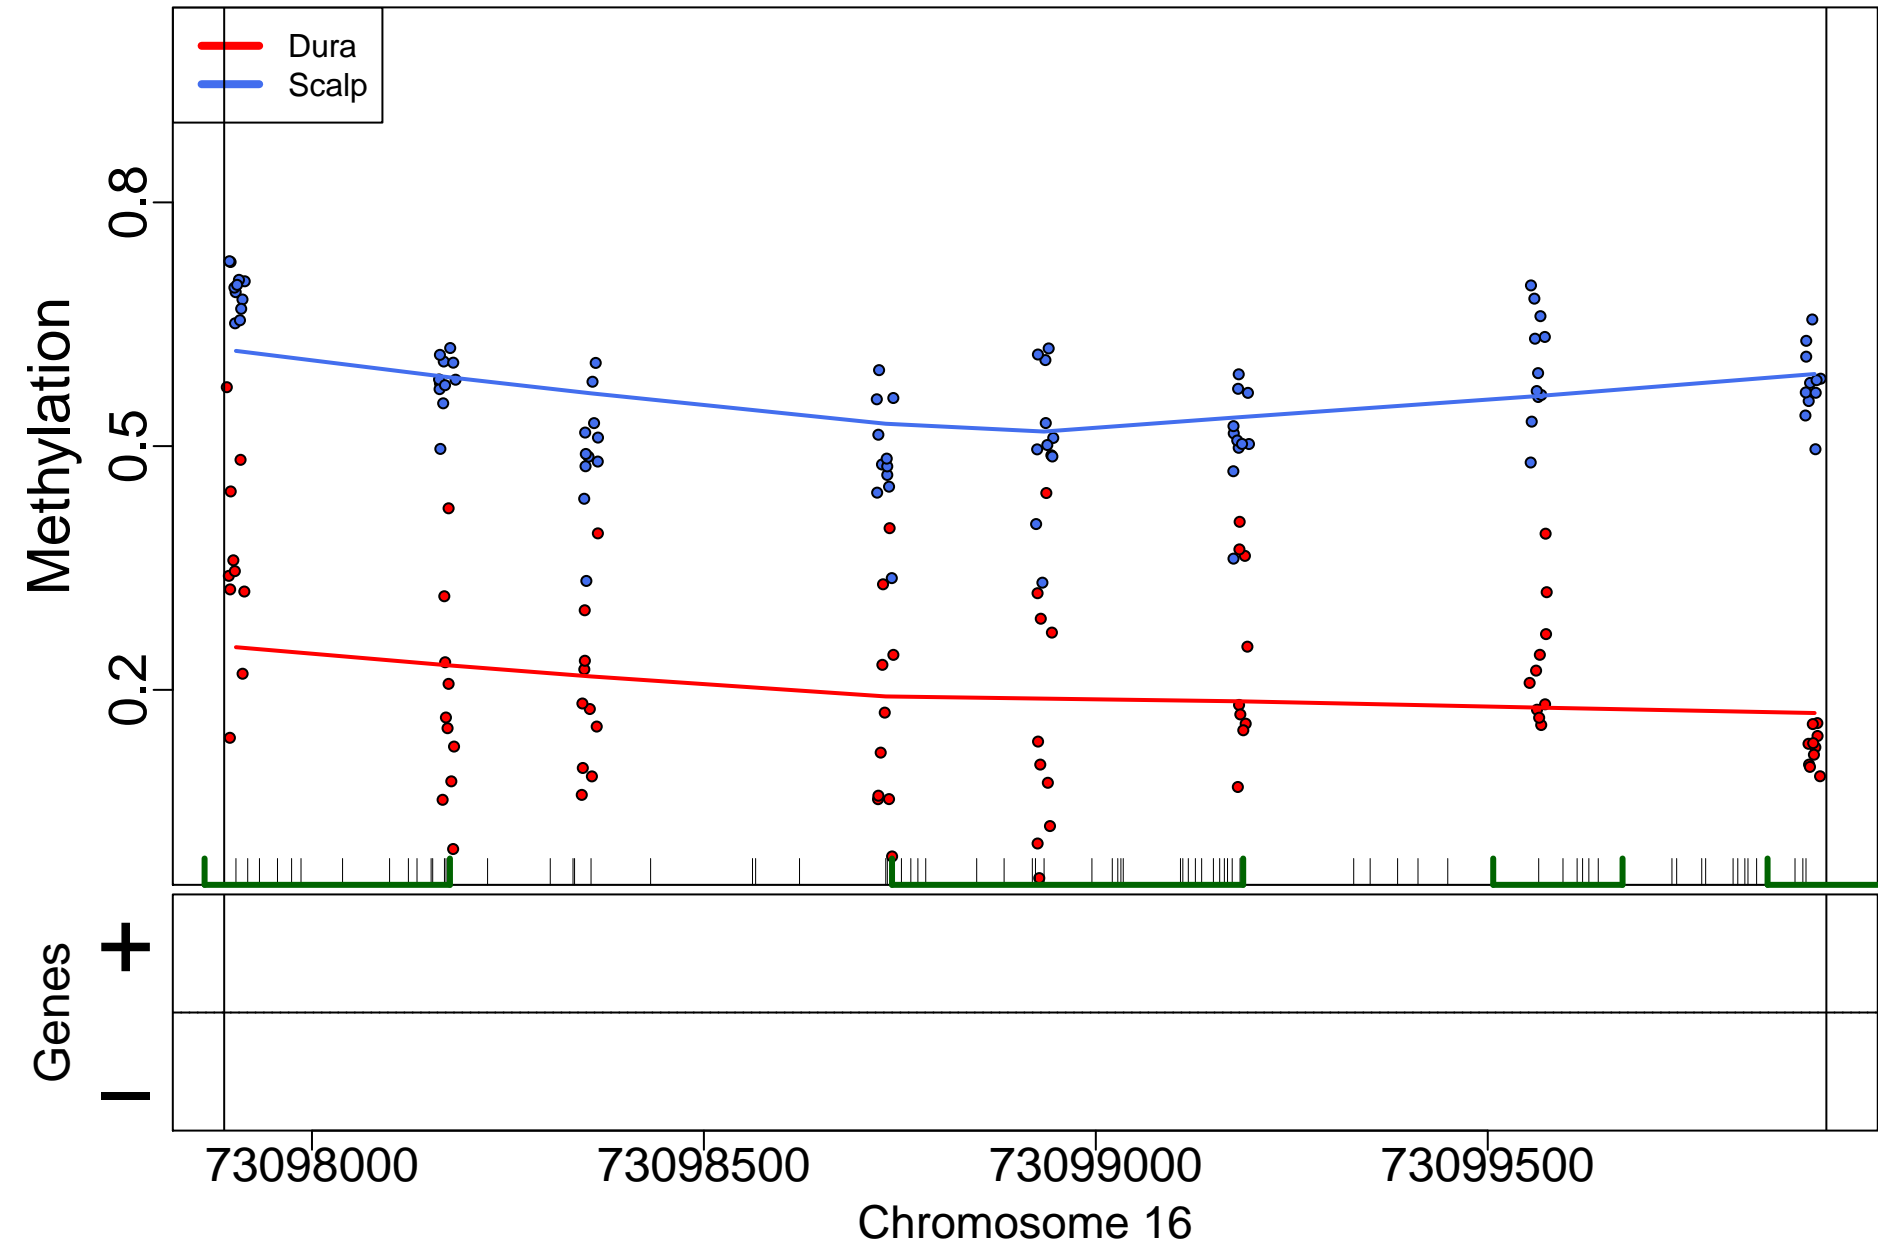

ABR; 3413bp from tss:upstream

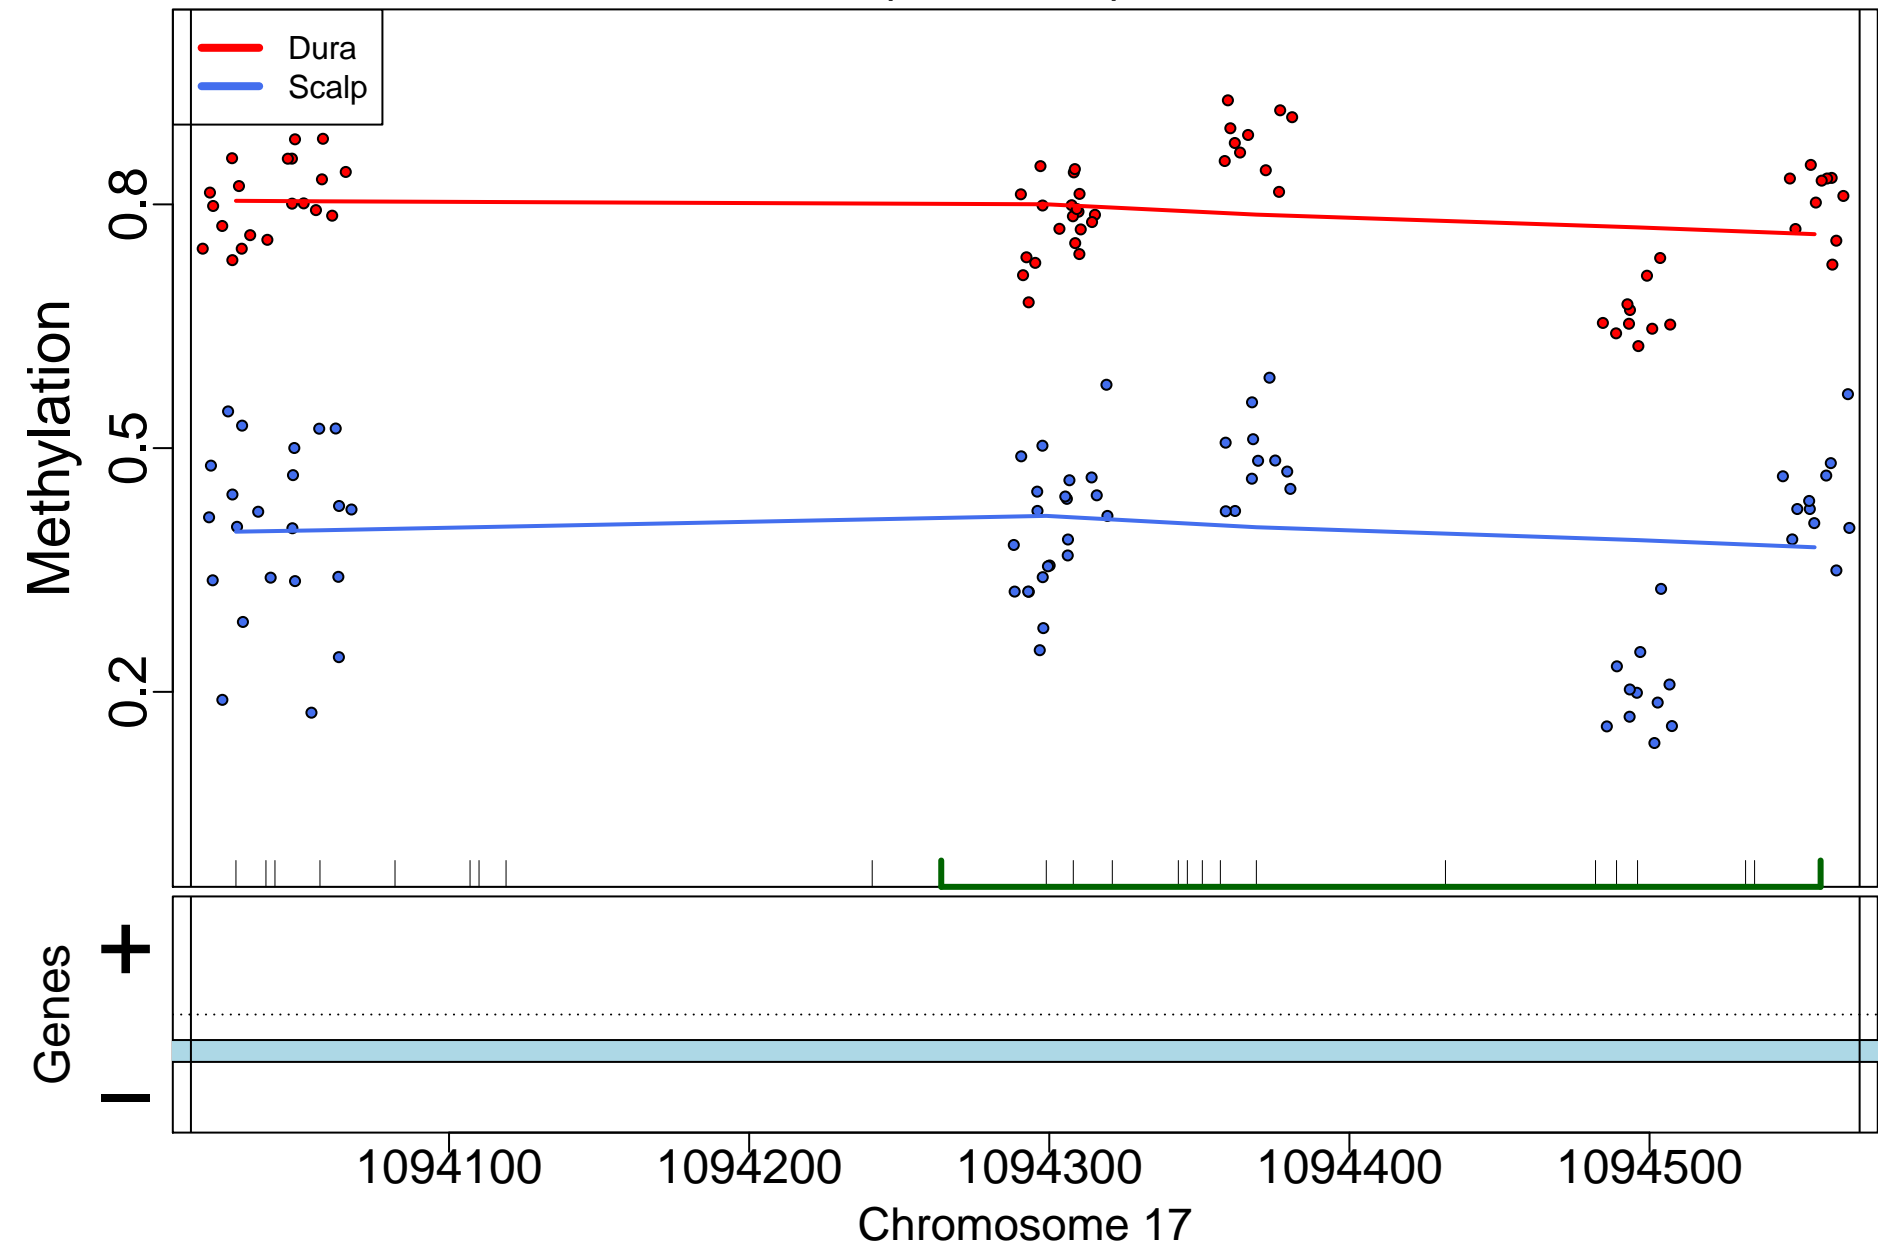

TNXB; 12387bp from tss:inside exon

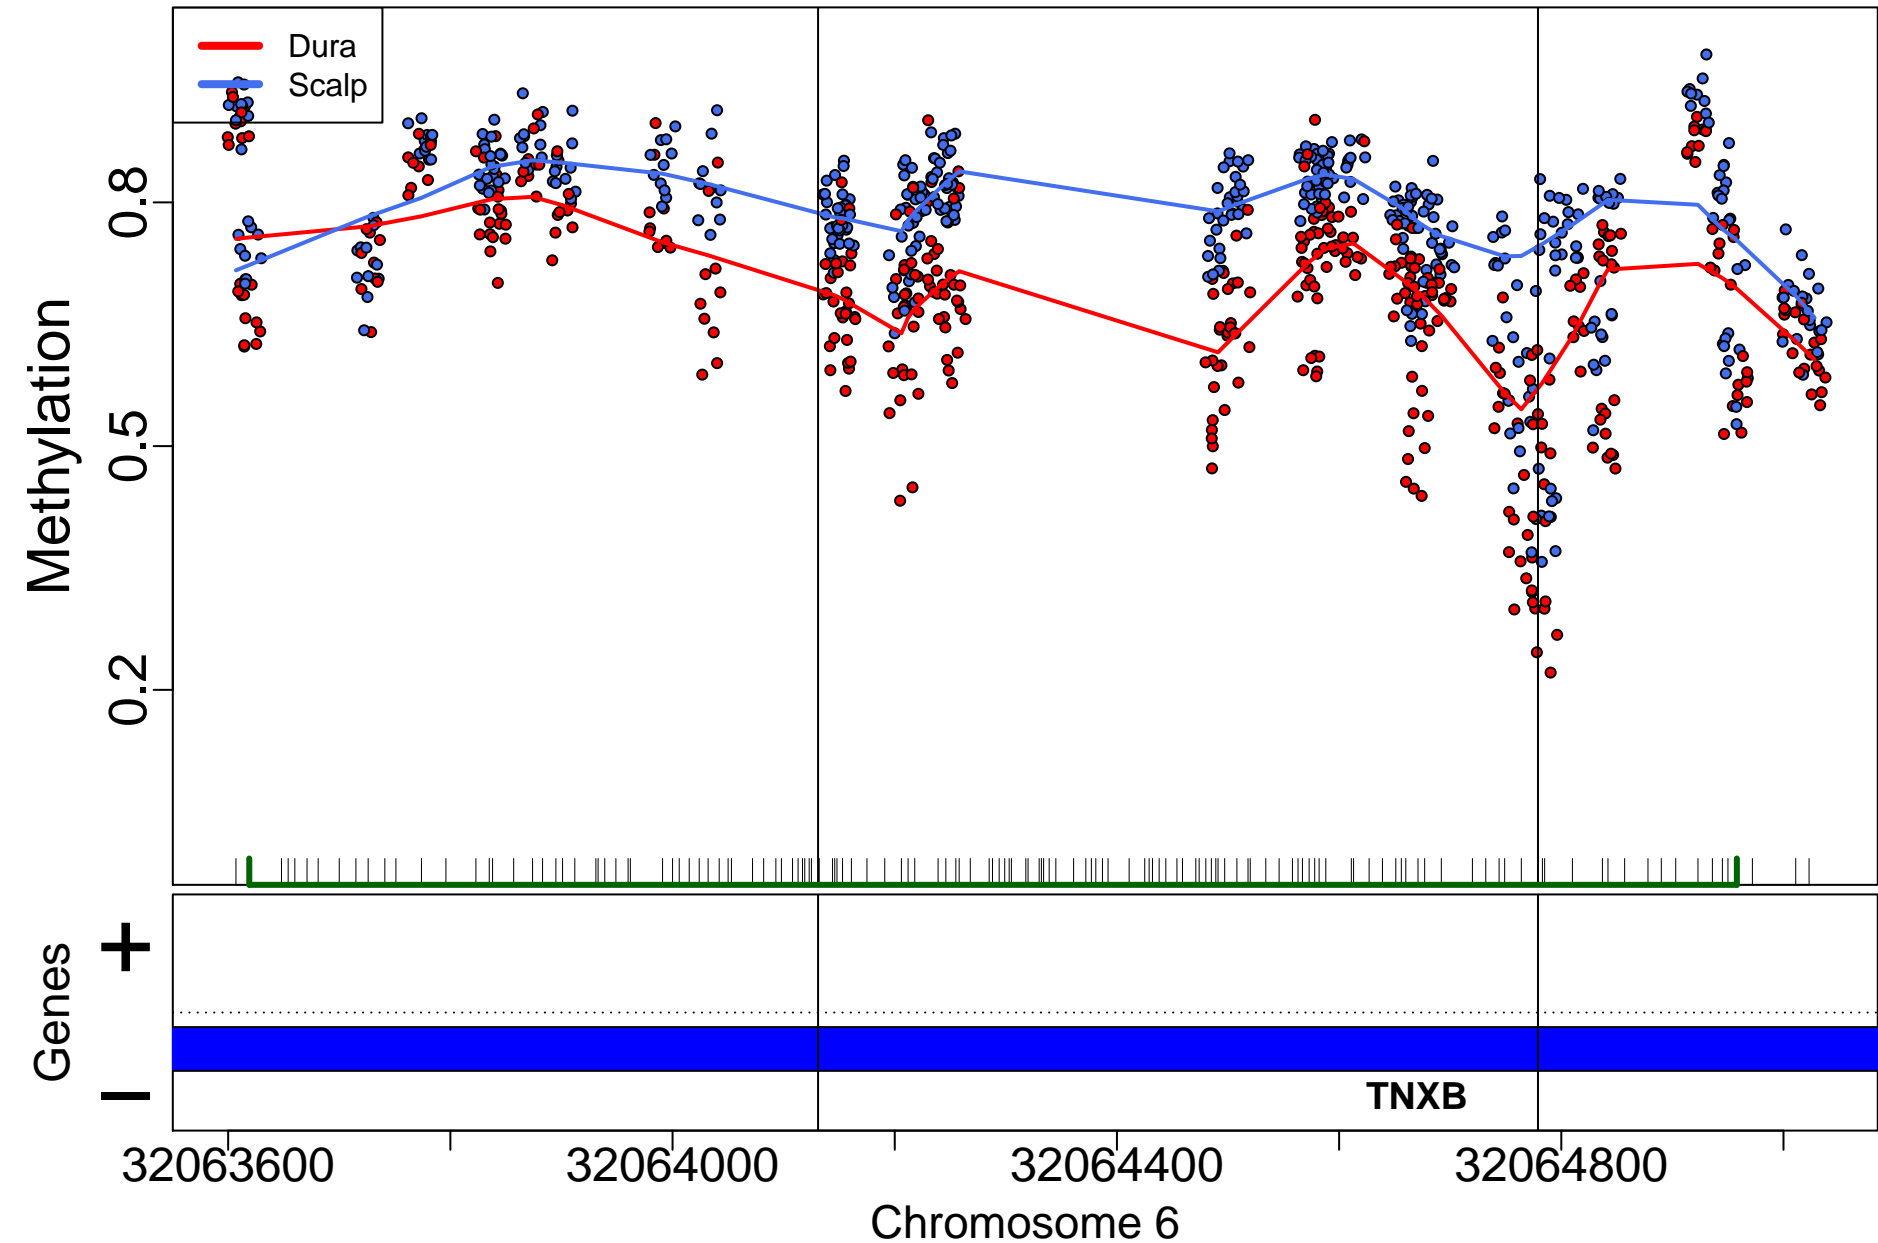

LNX1; 0bp from tss:NA

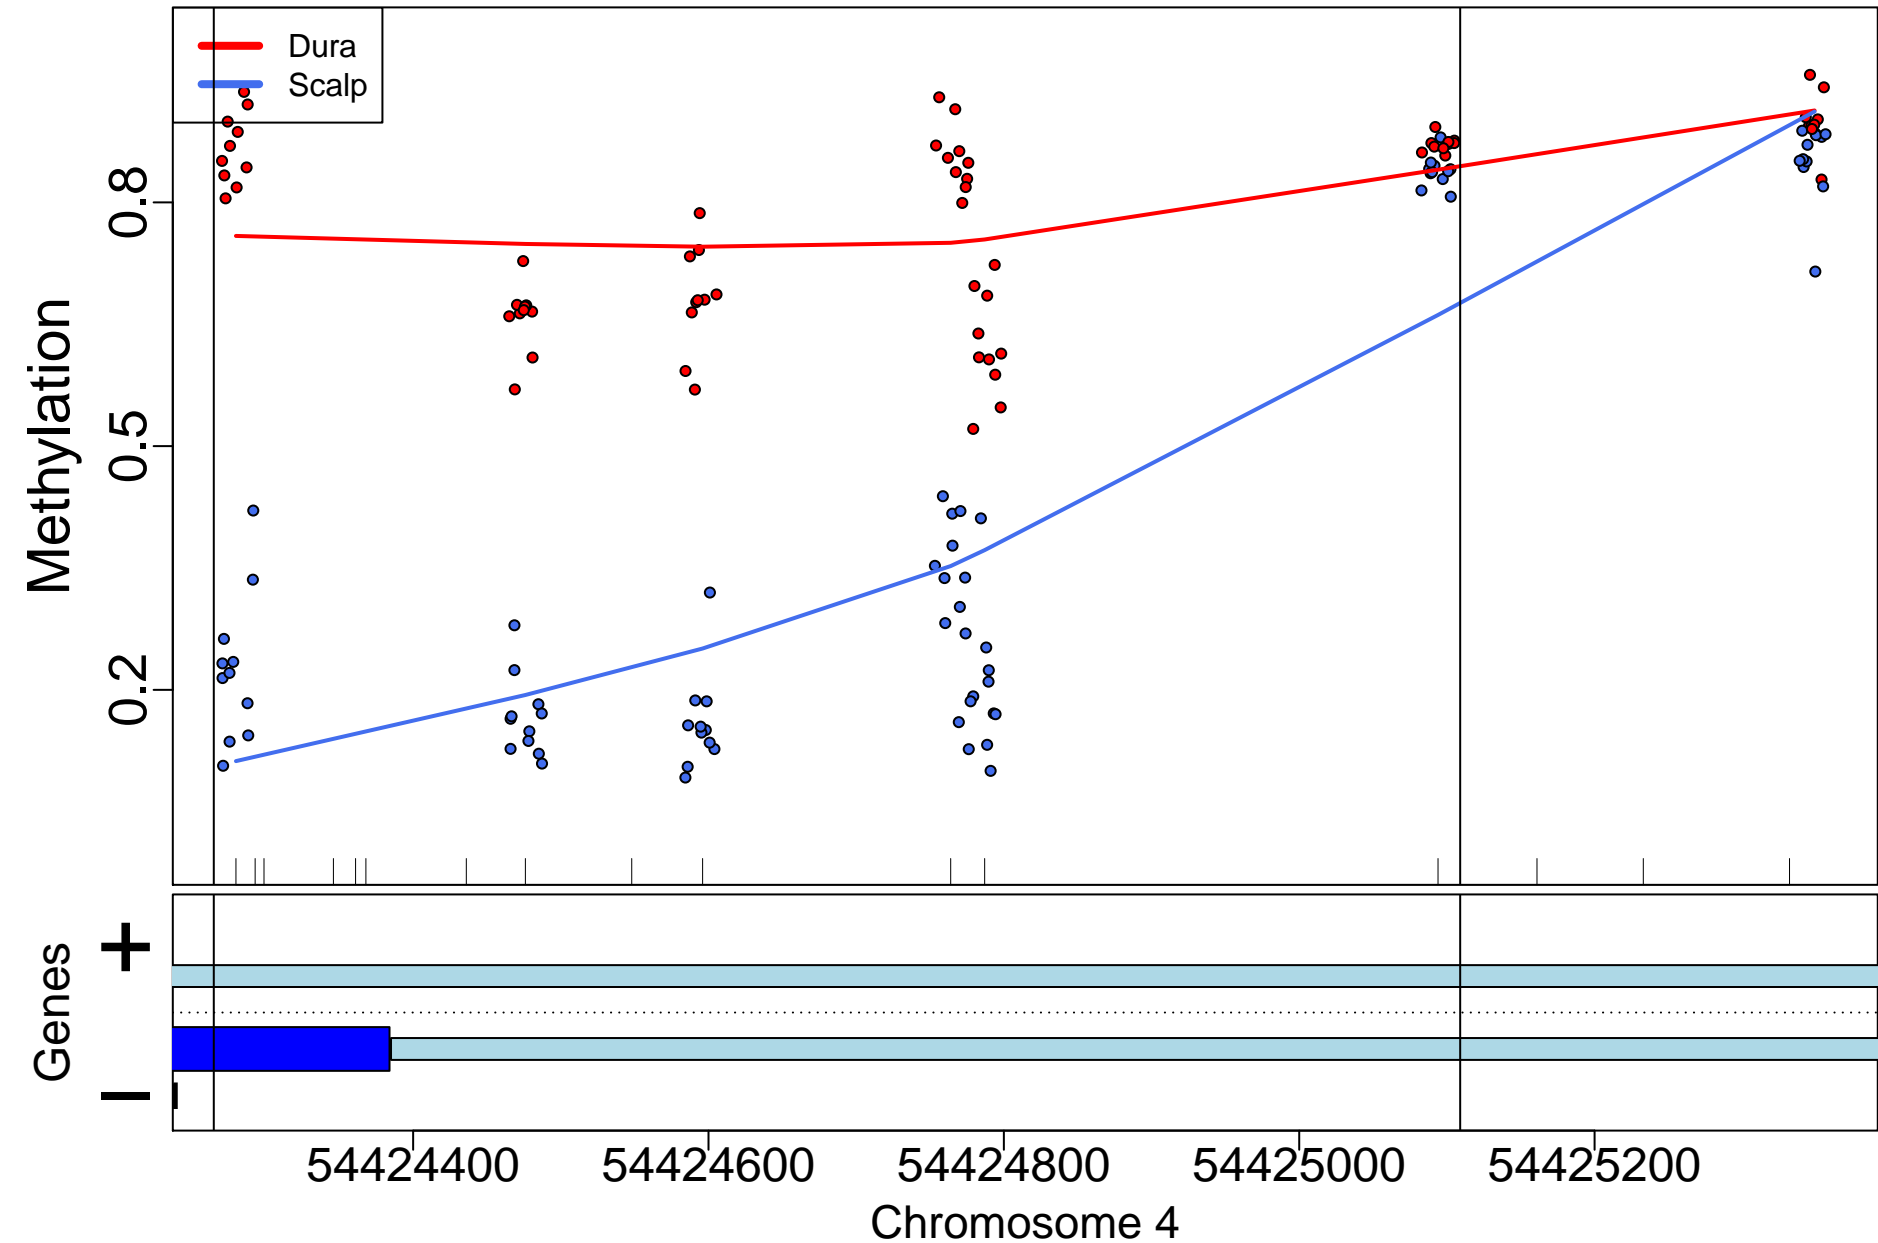



POU3F3; 11528bp from tss:downstream

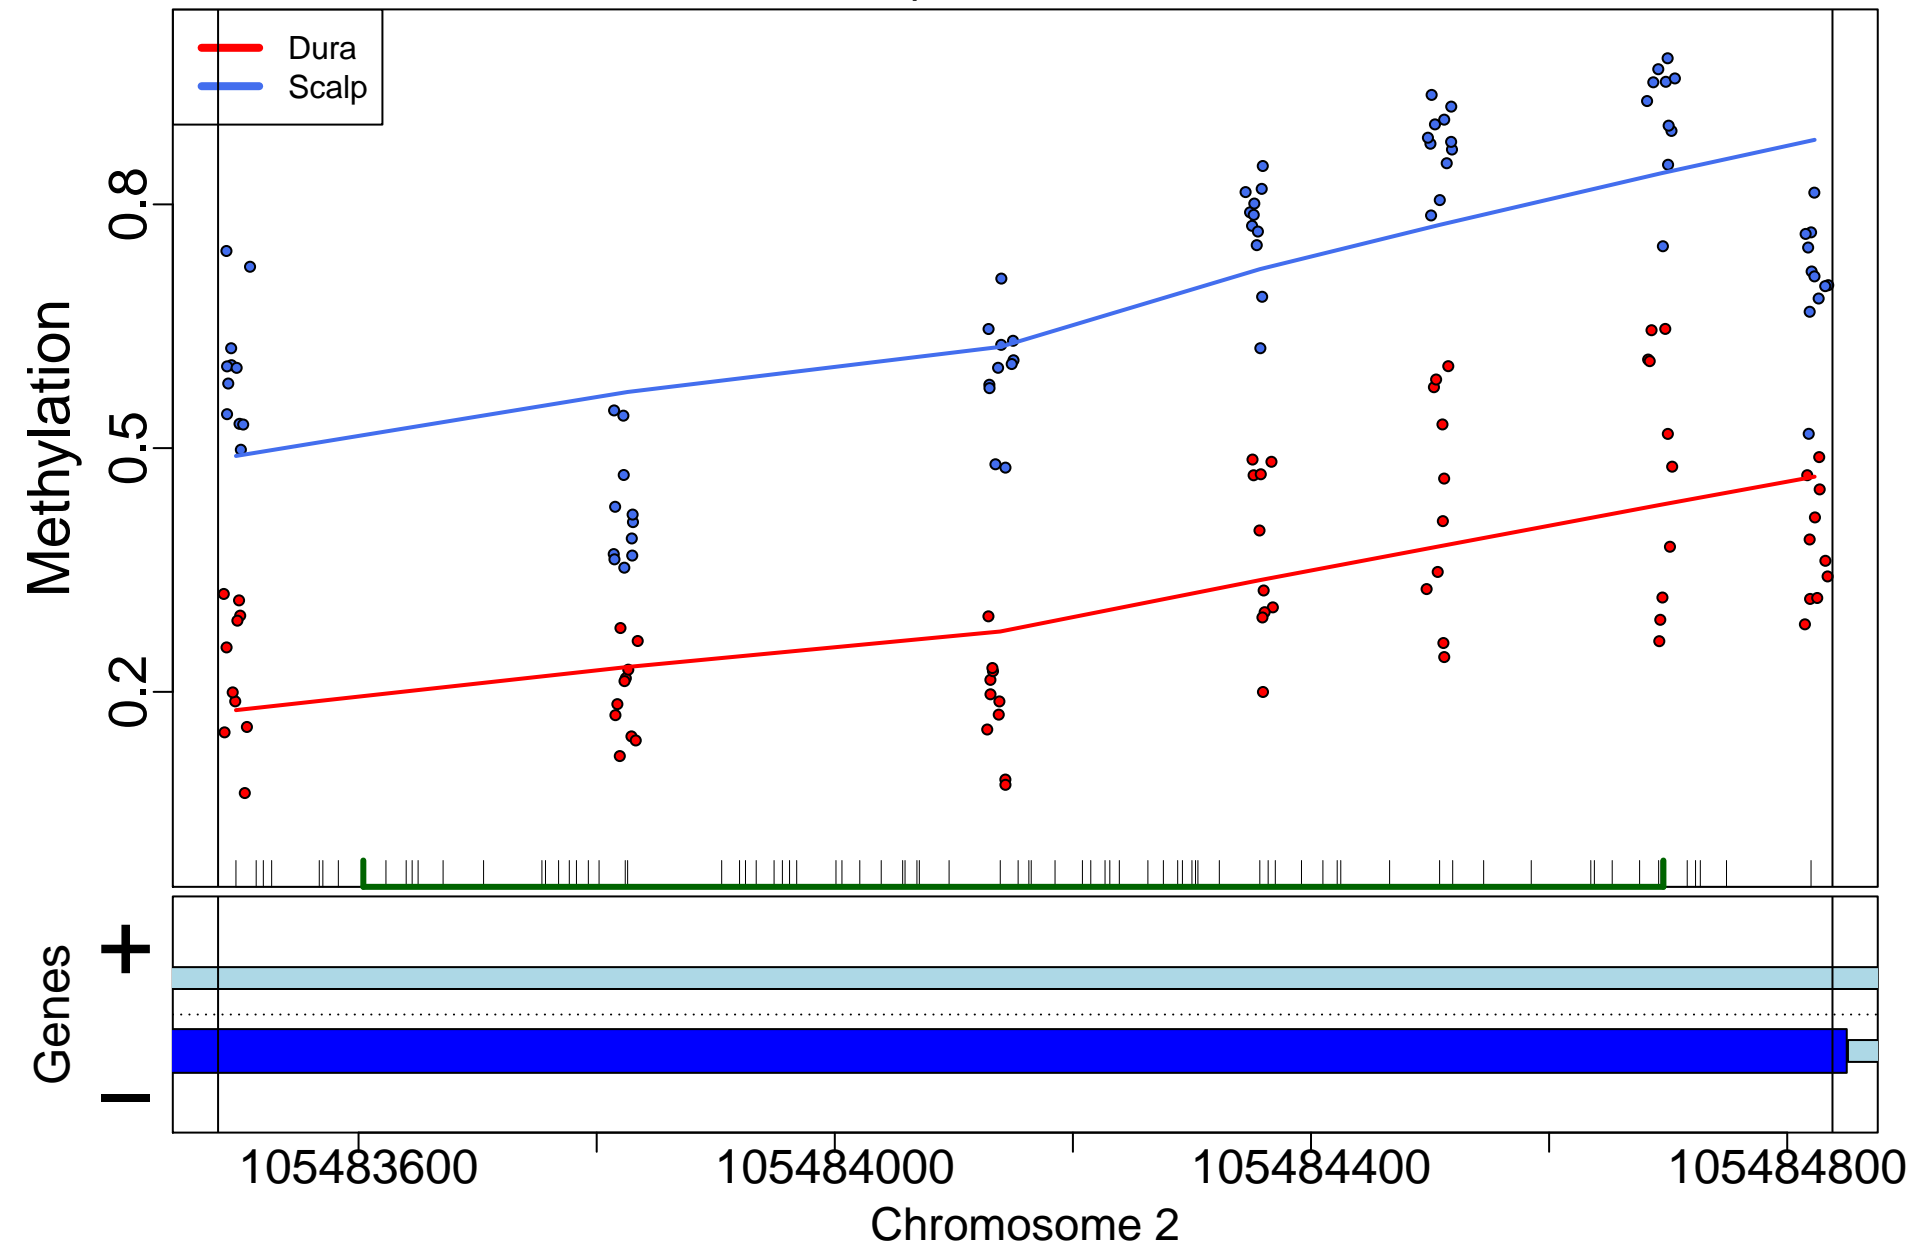

# HLX; 4493bp from tss:overlaps exon upstream

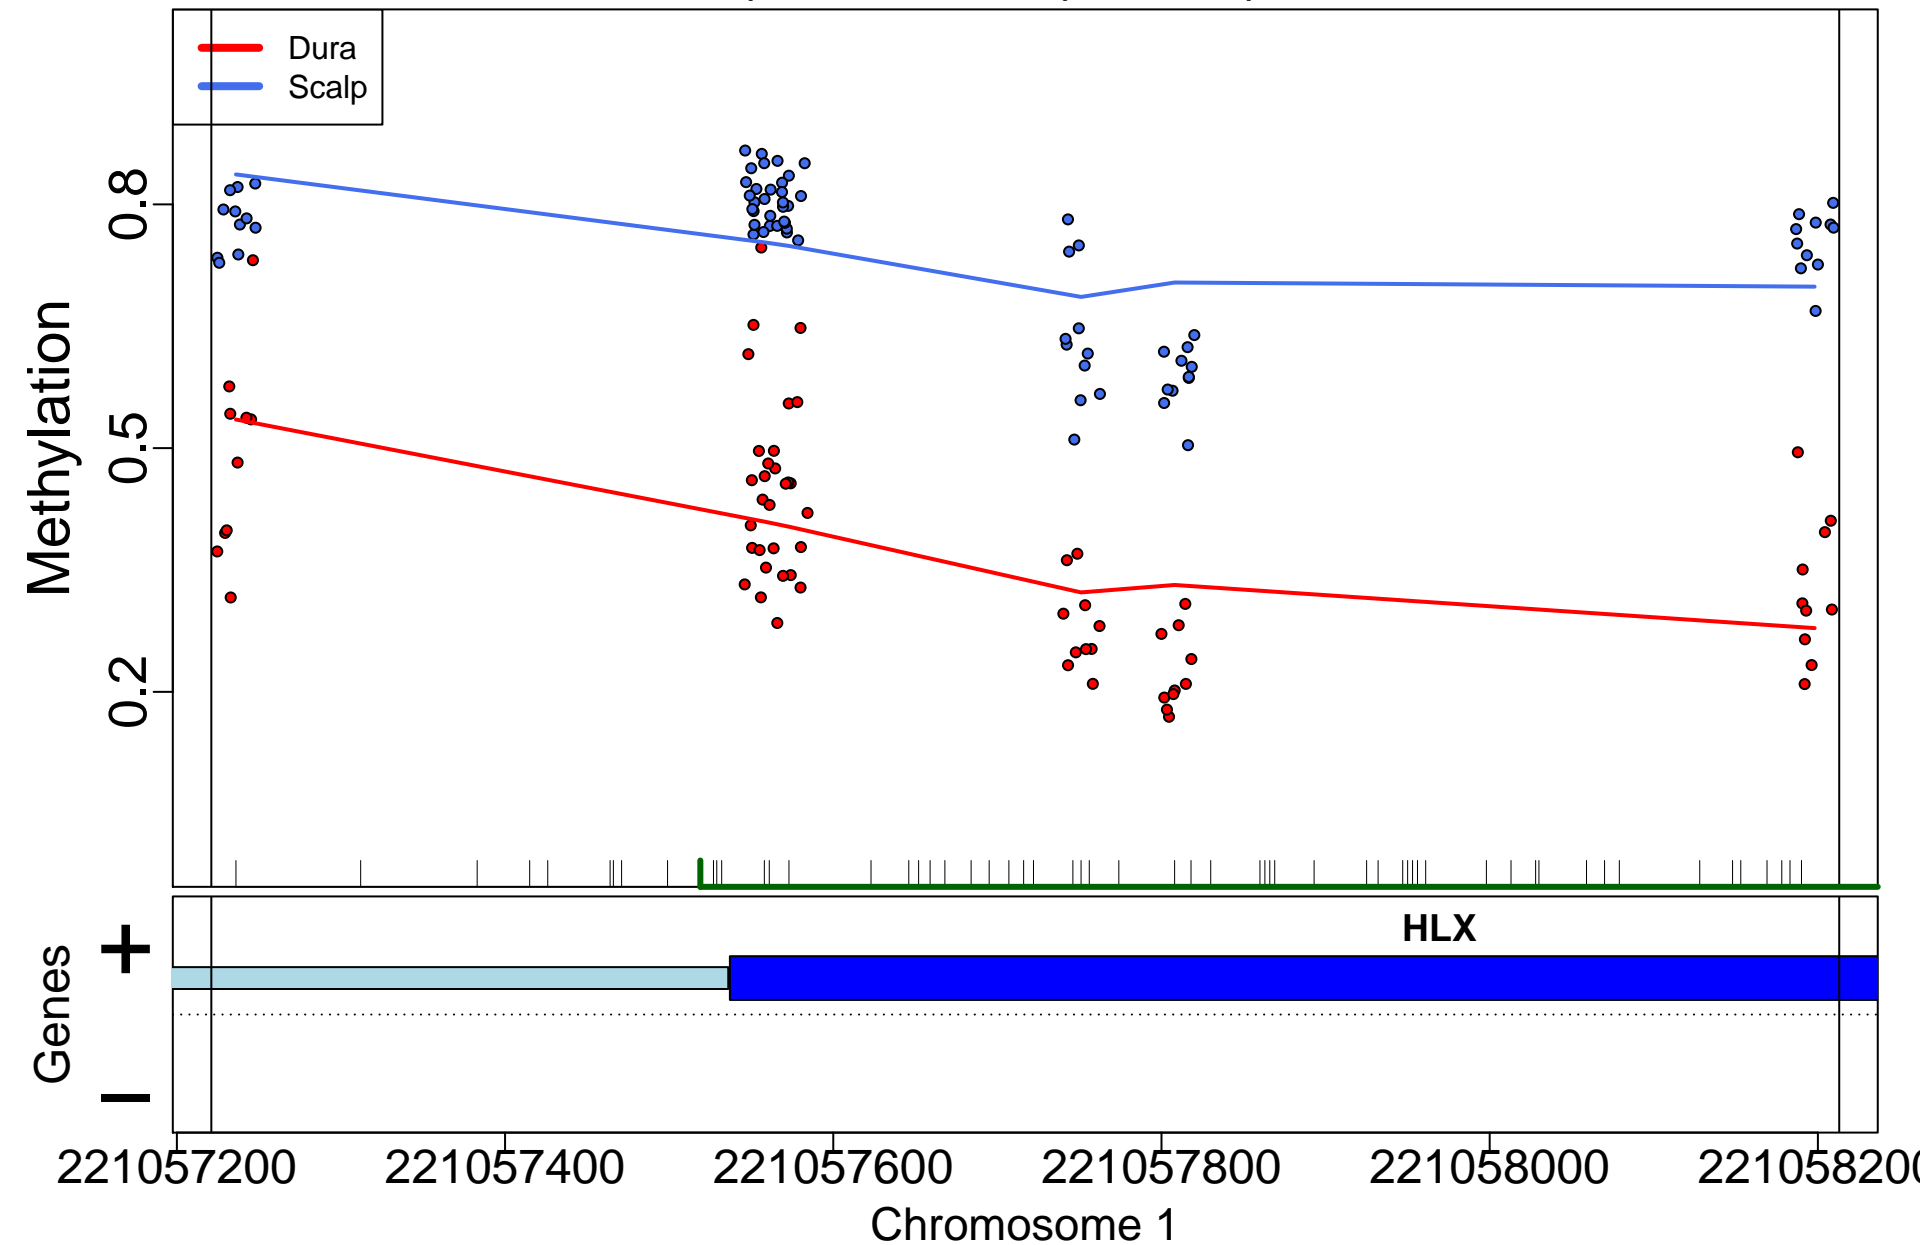

KIF25; 0bp from tss:overlaps 5'

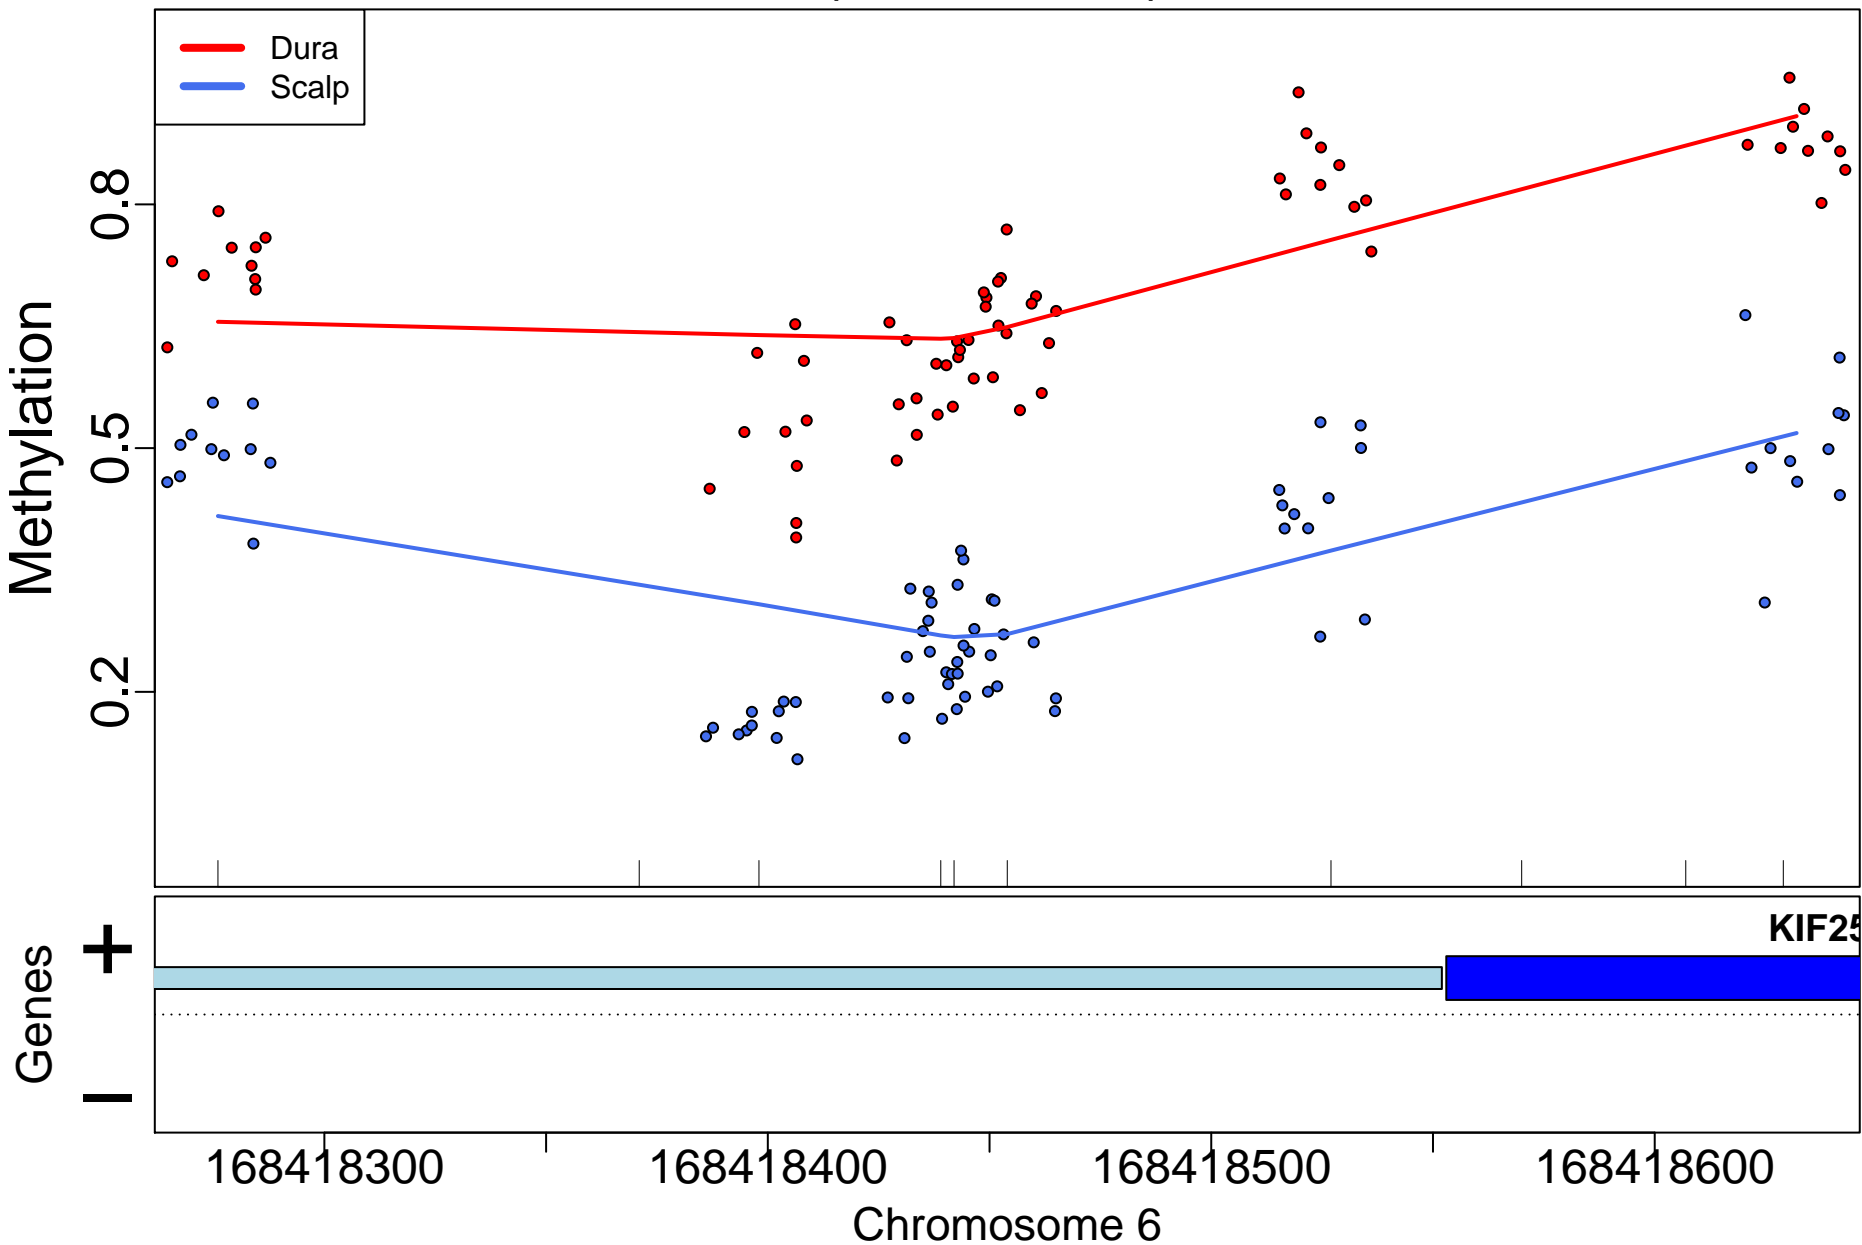

FOXP1; 228324bp from tss:inside intron

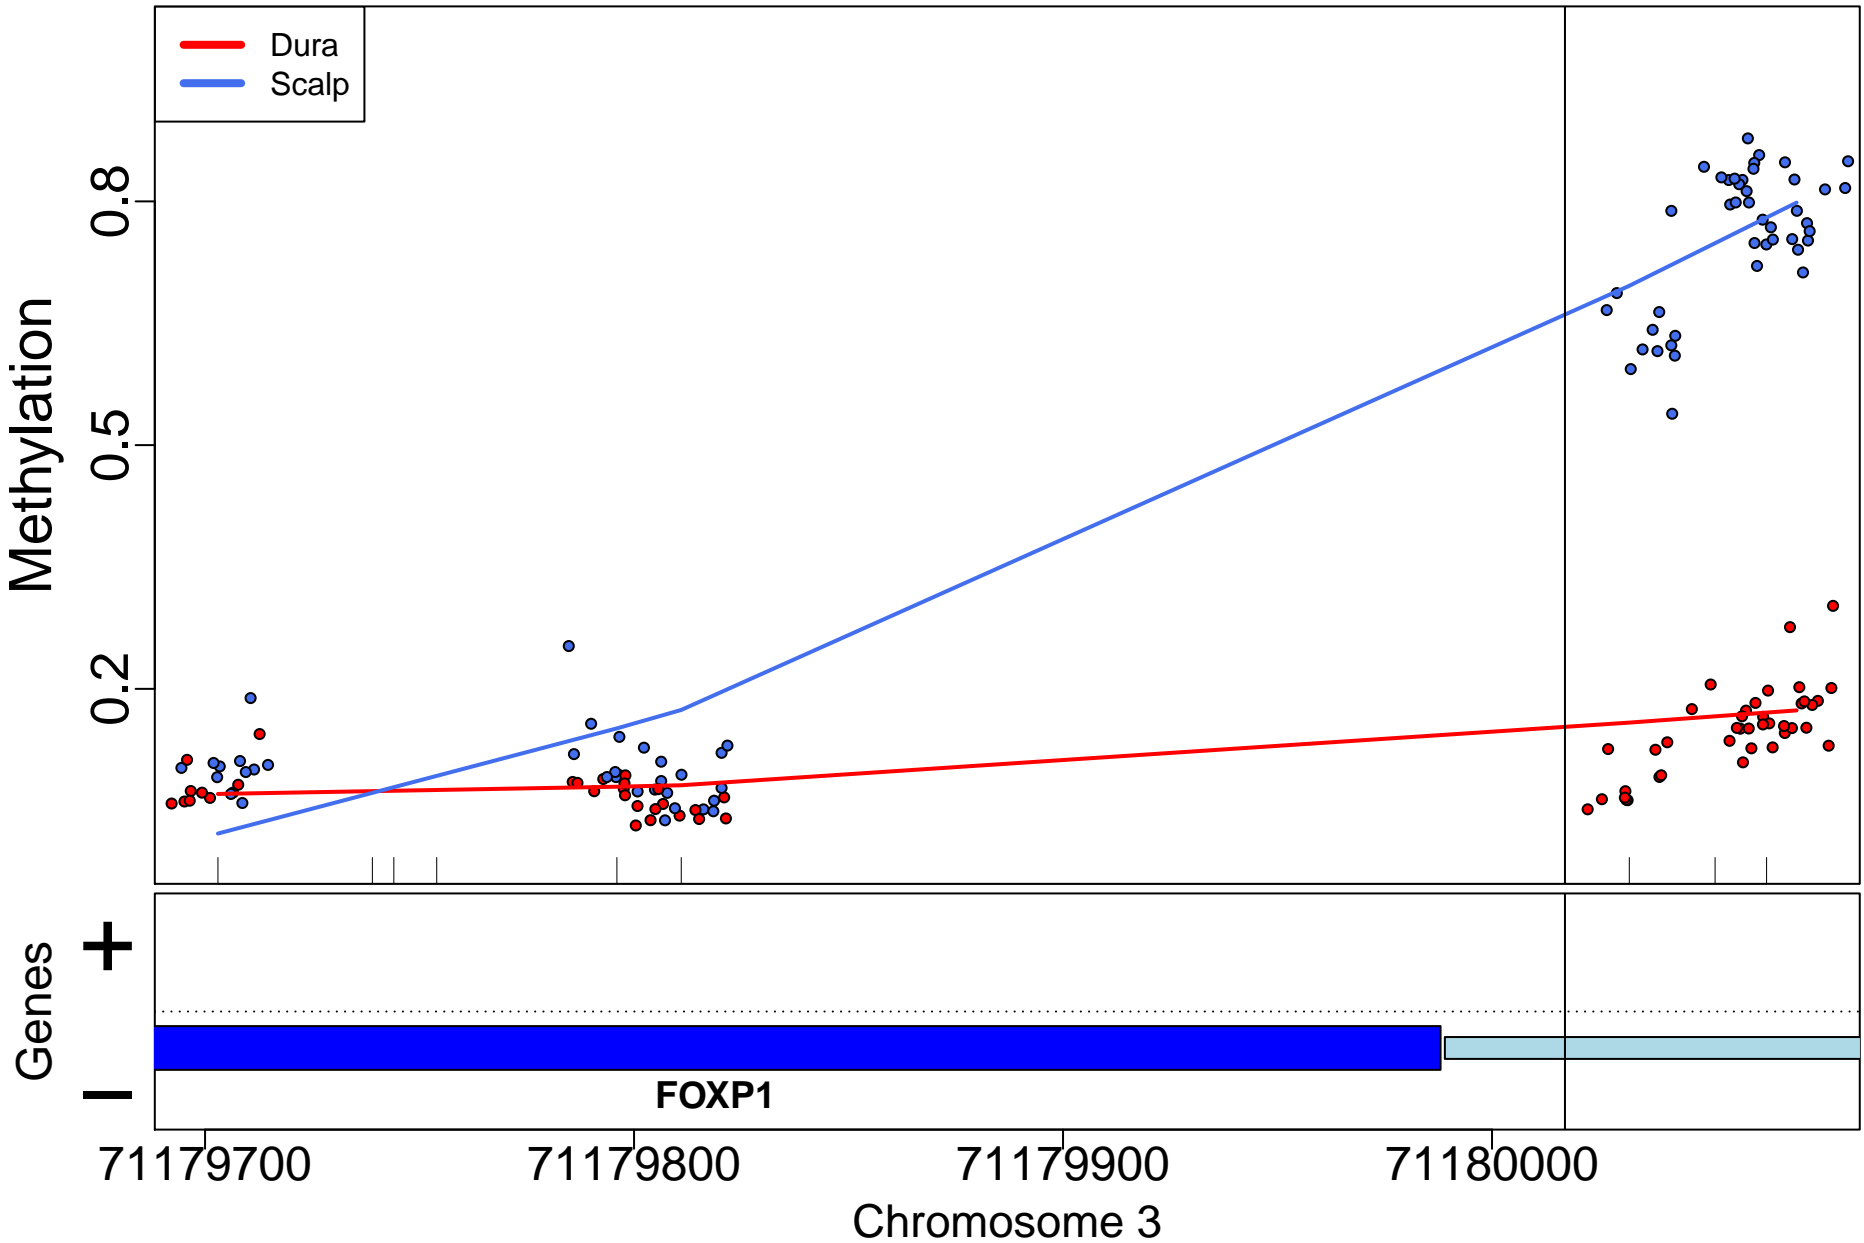

OLA1; 222516bp from tss:downstream

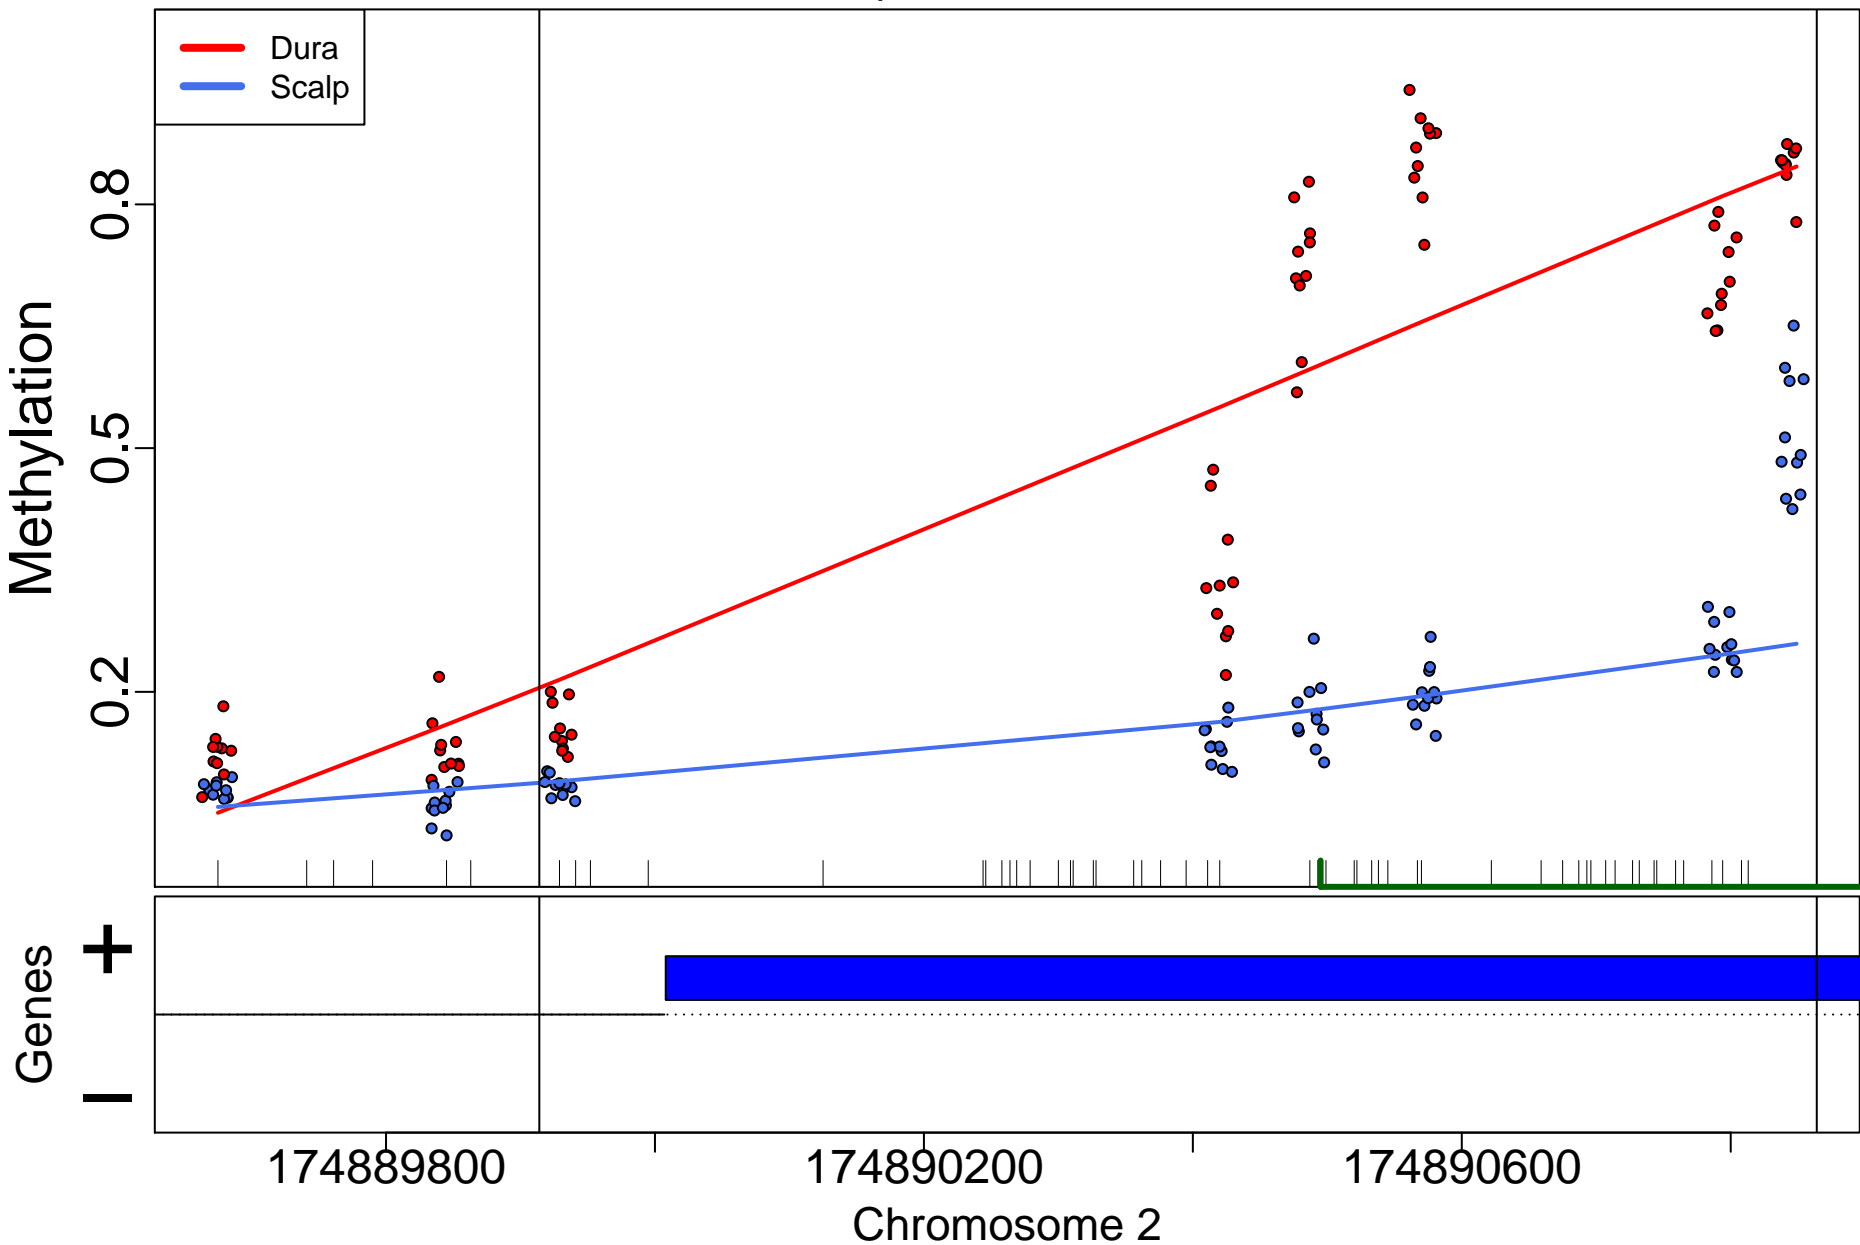

## NRN1; 4049bp from tss:covers exon(s)

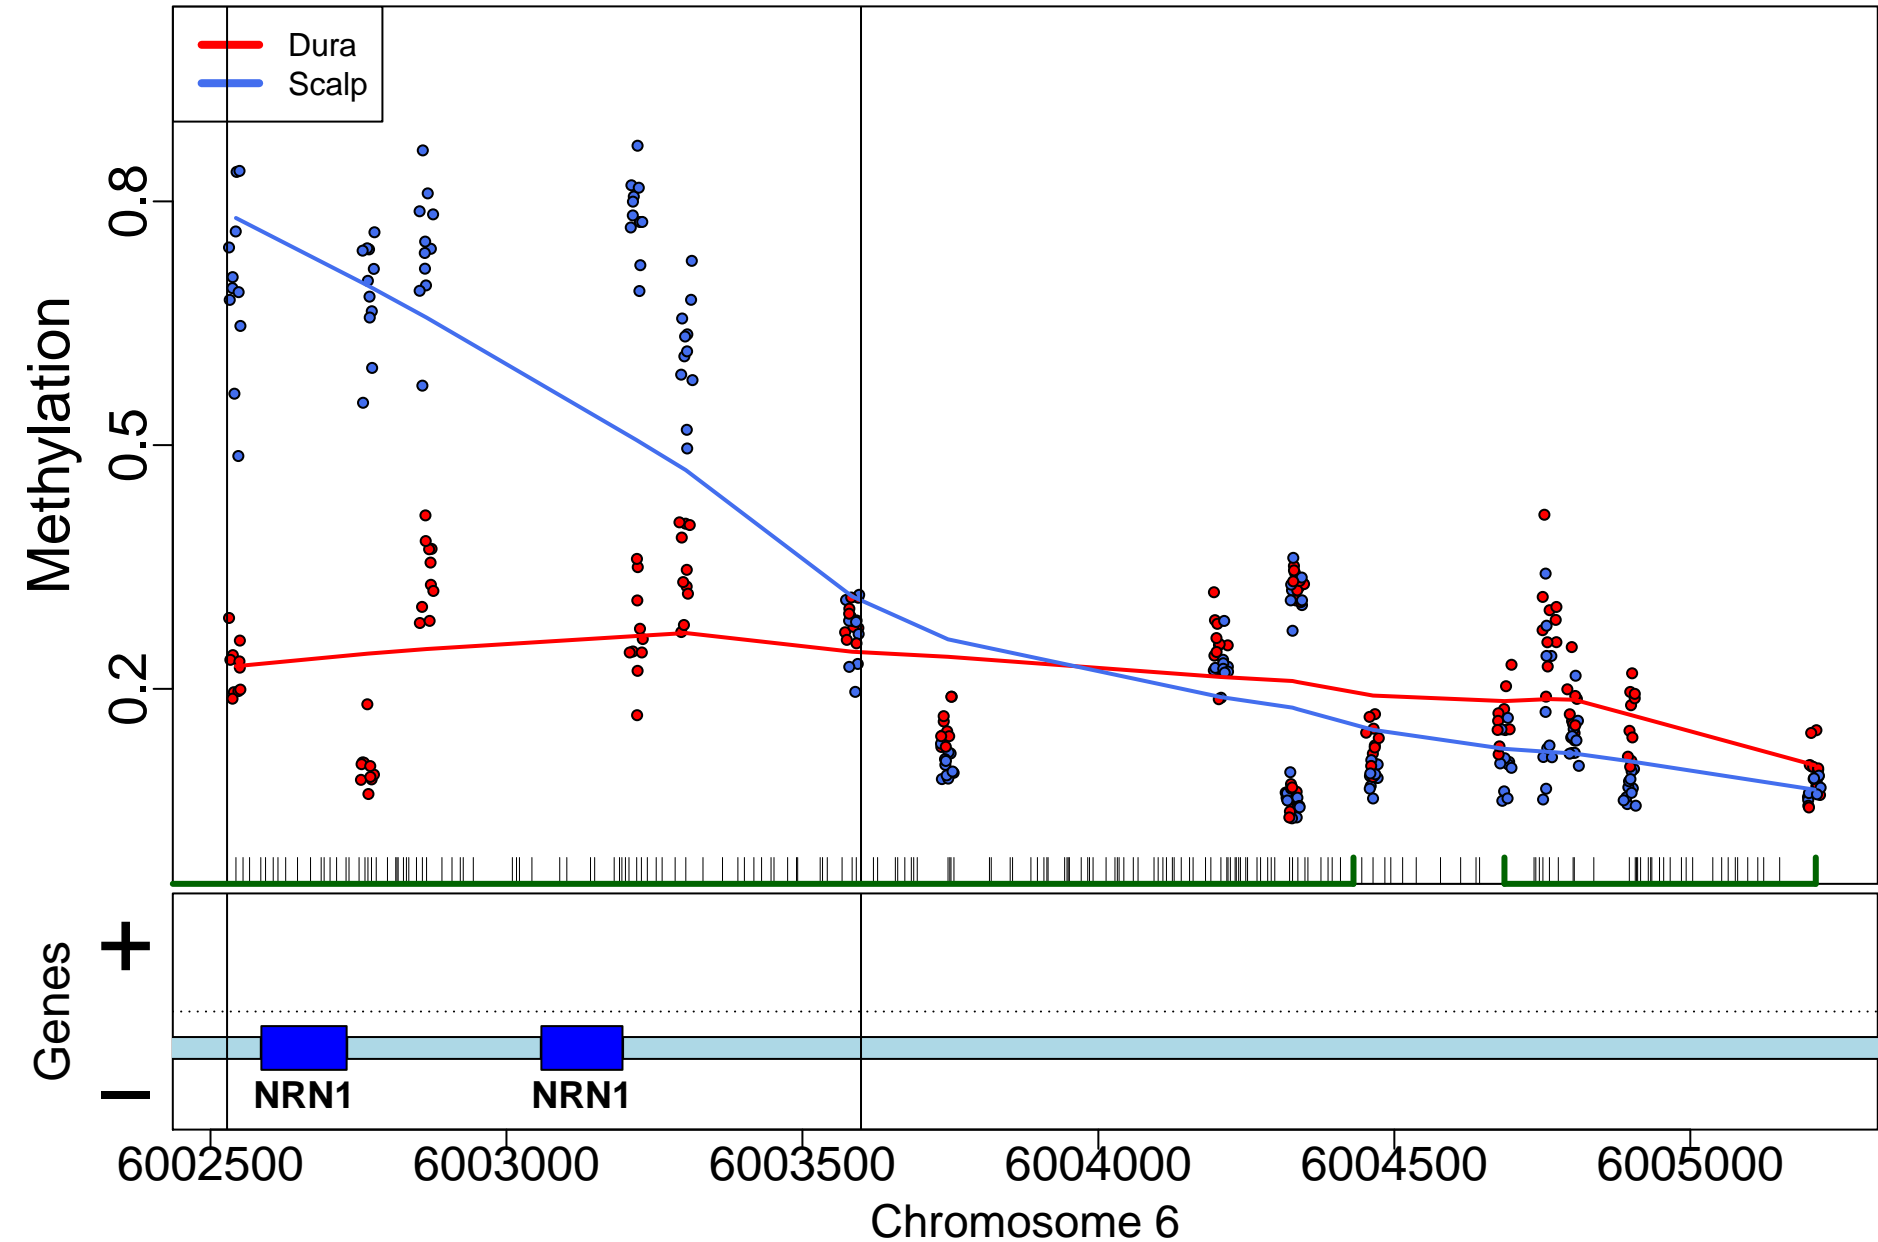

CFD; 0bp from tss:overlaps 5'

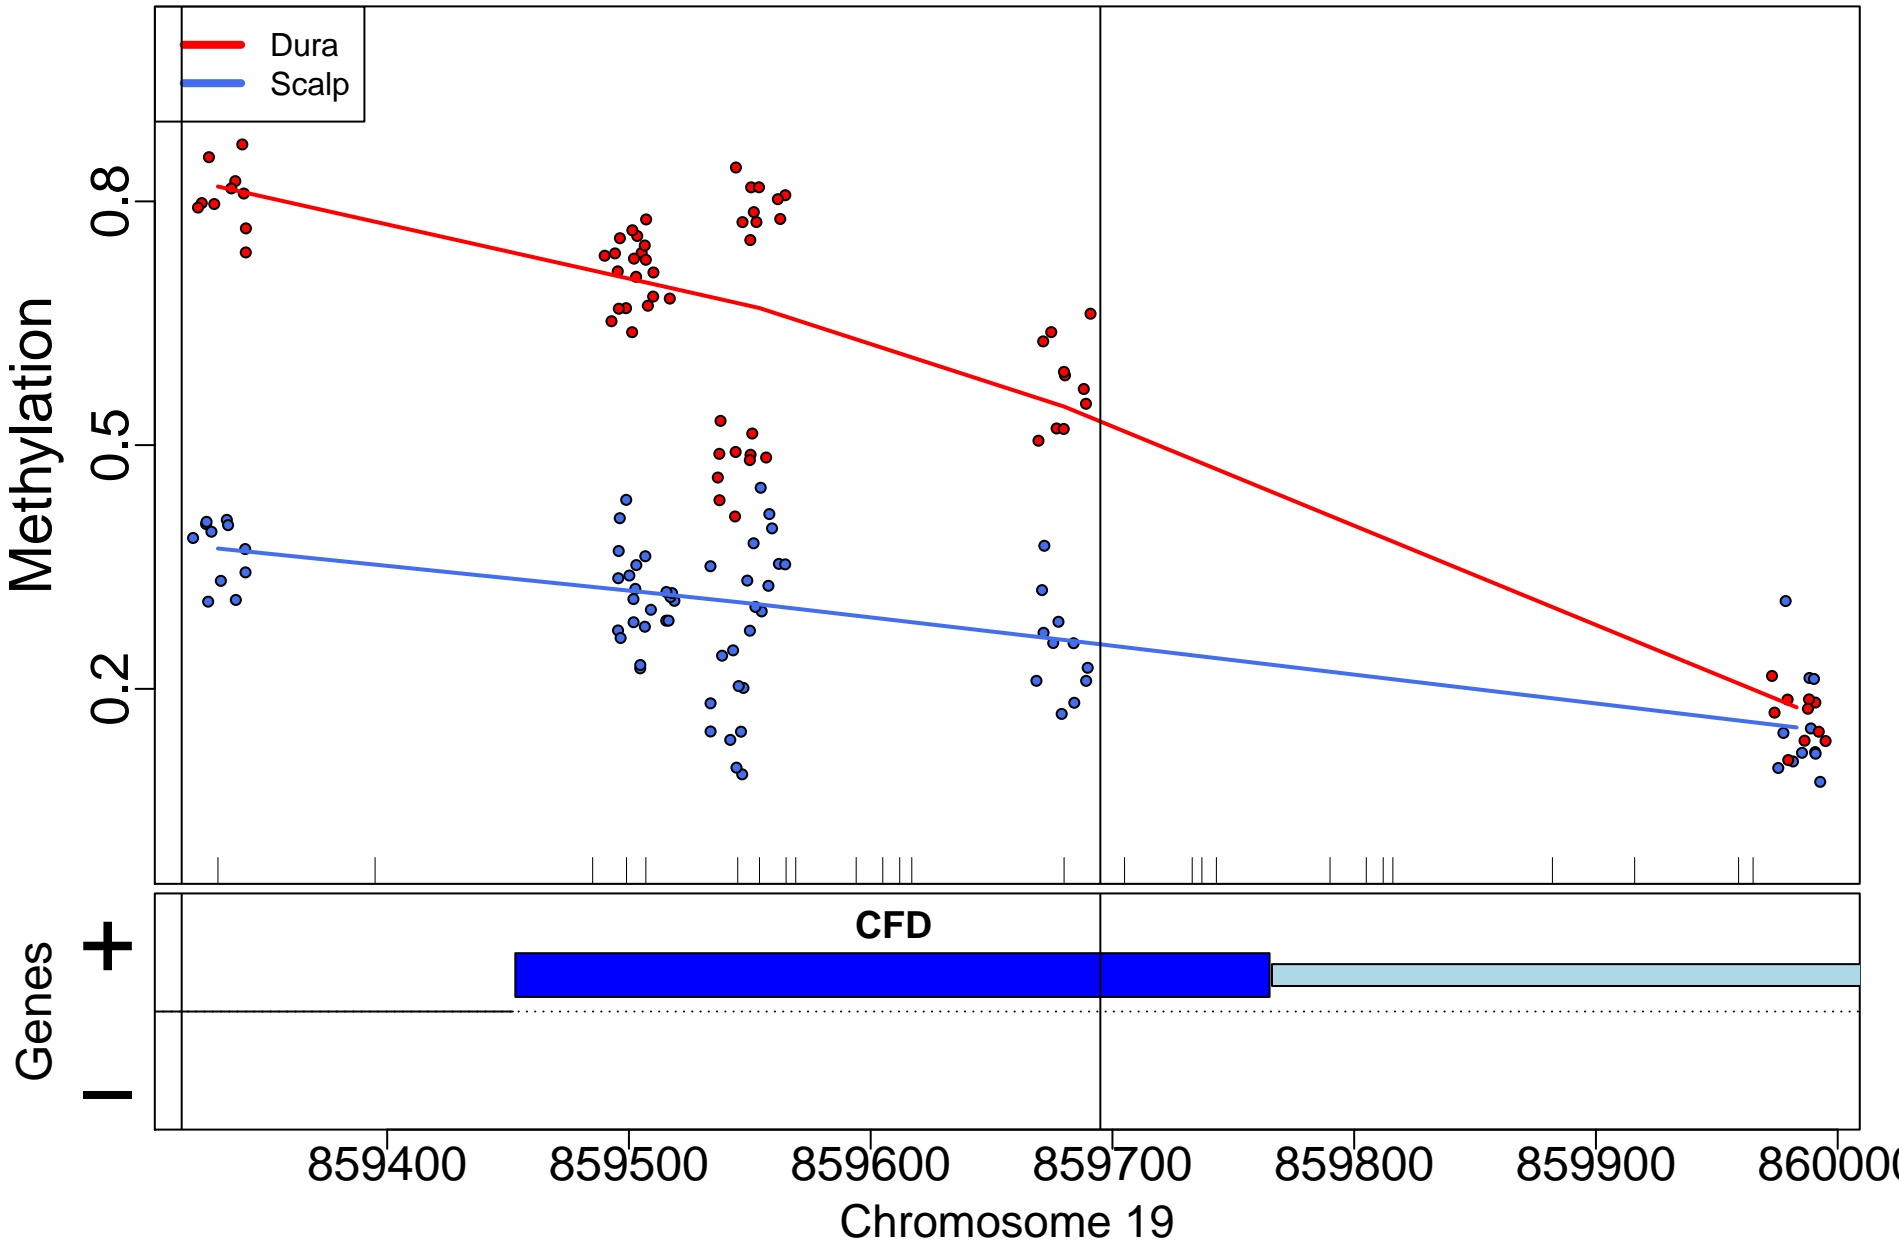

EN1; 14132bp from tss:downstream

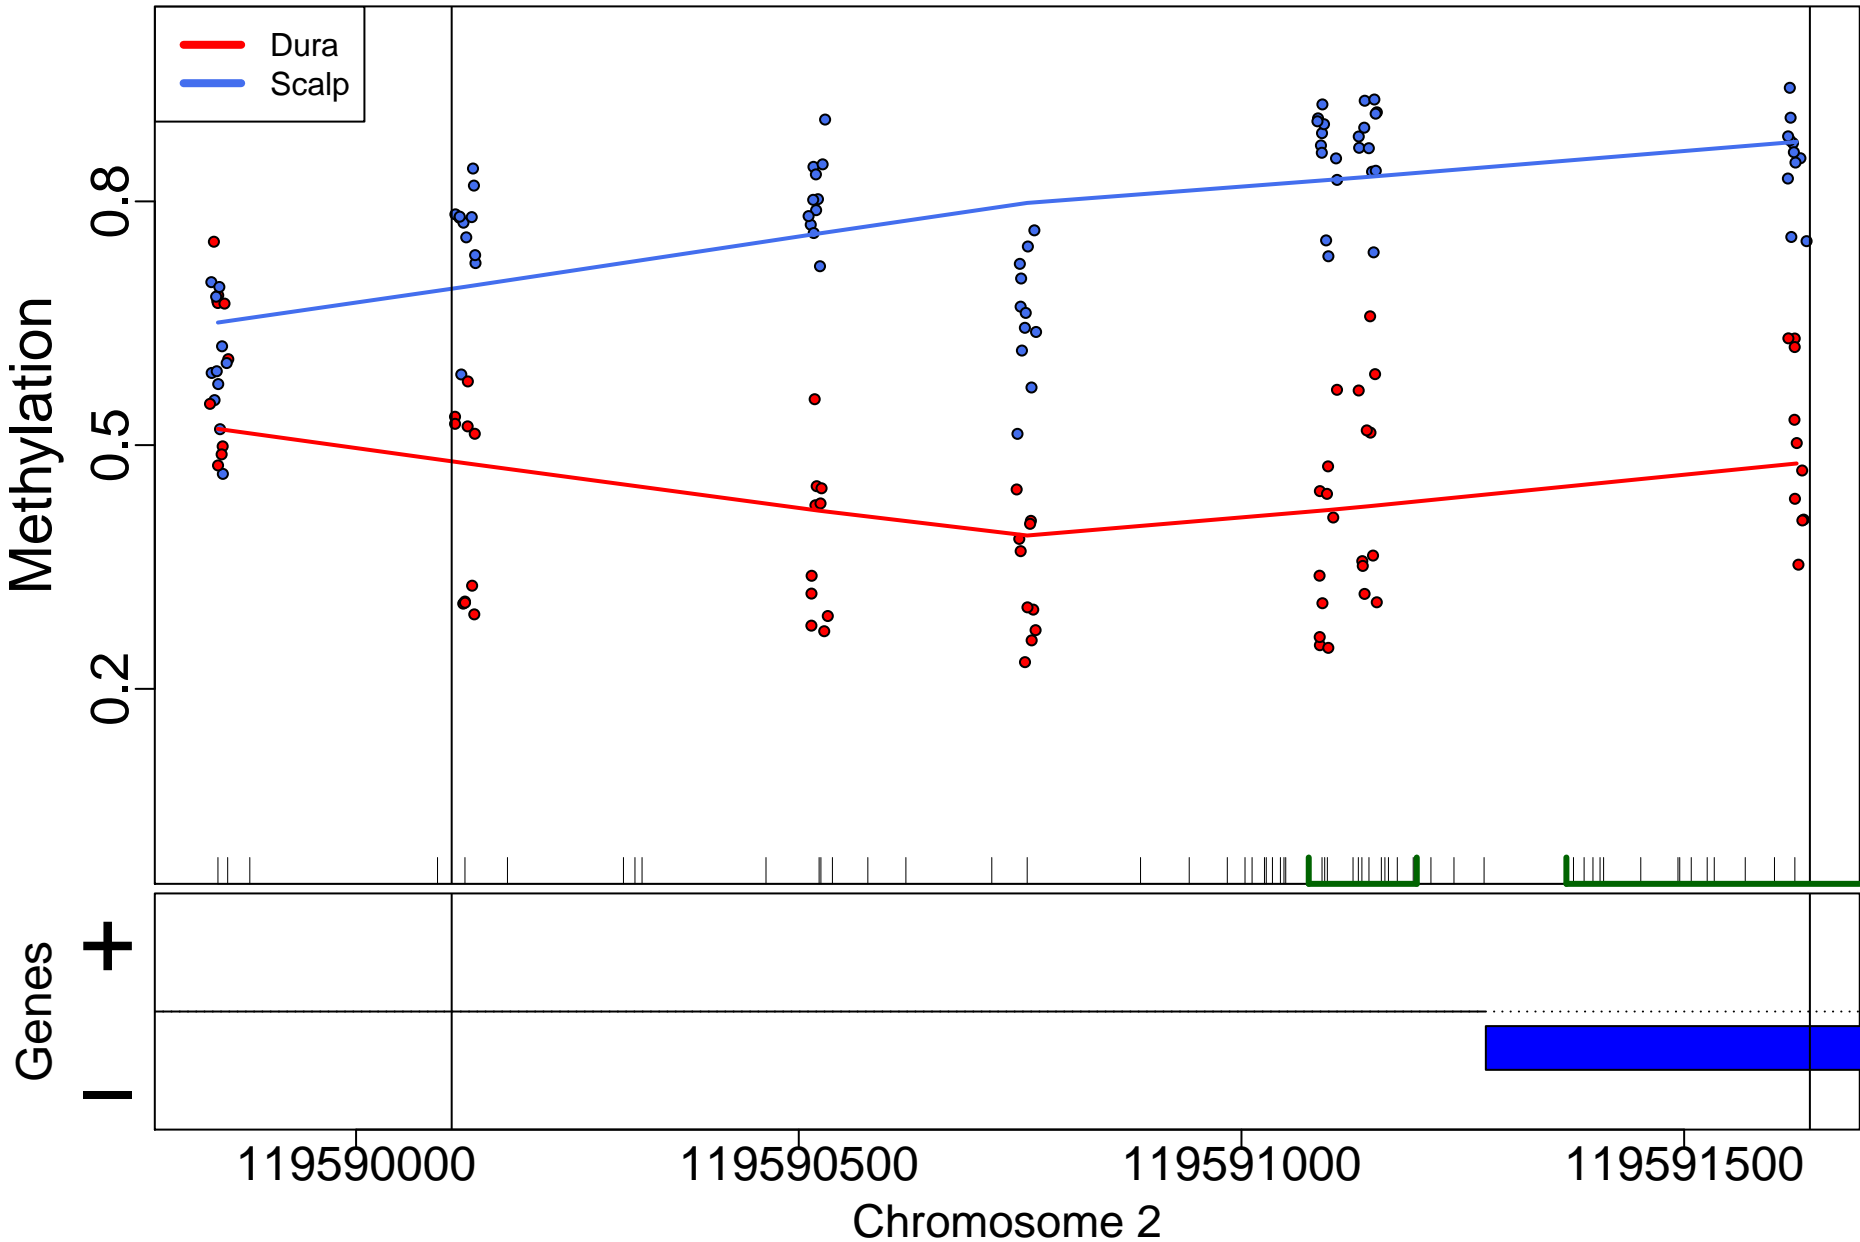



SMOC2; 400938bp from tss:downstream

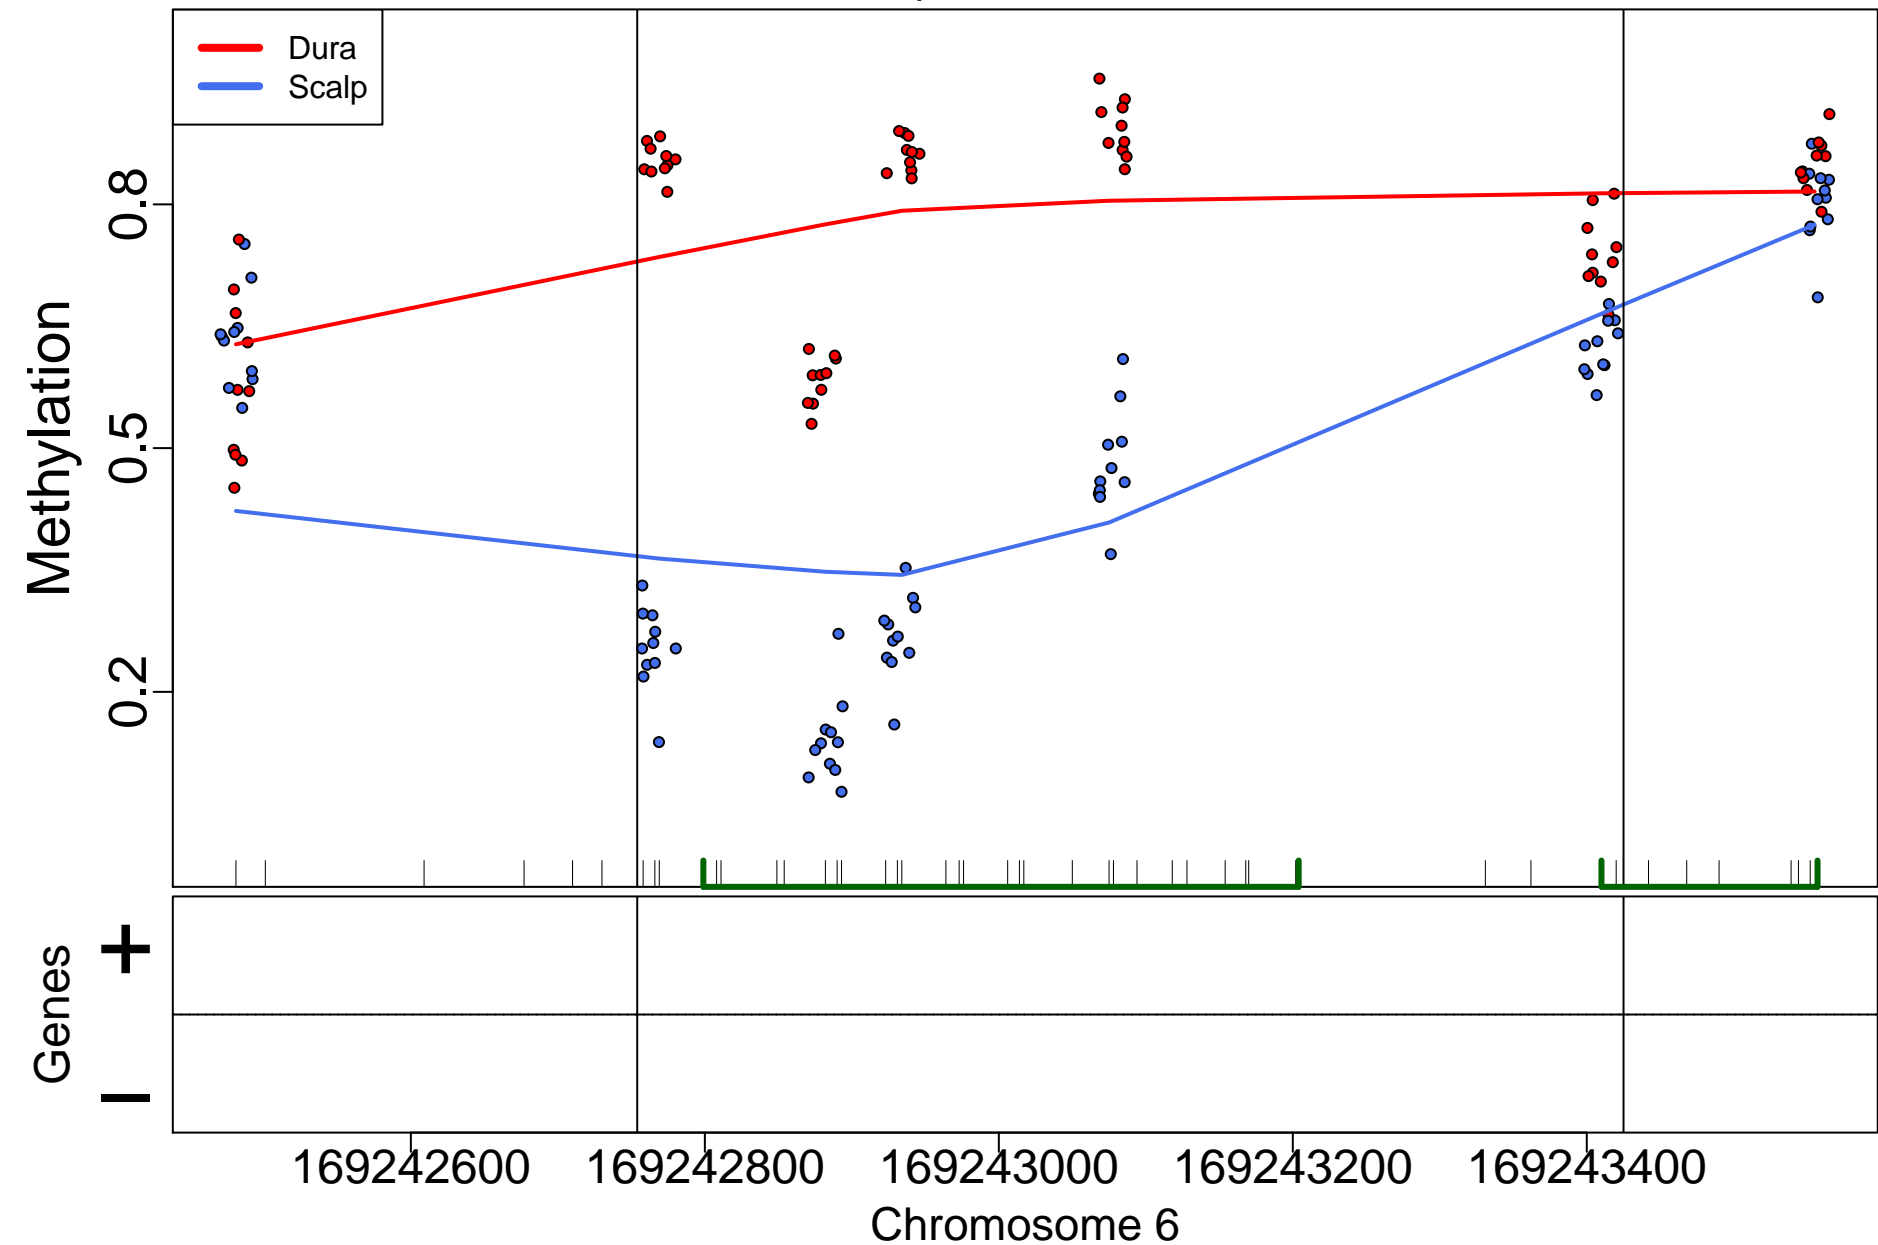

## ATP11A; 52317bp from tss:inside intron

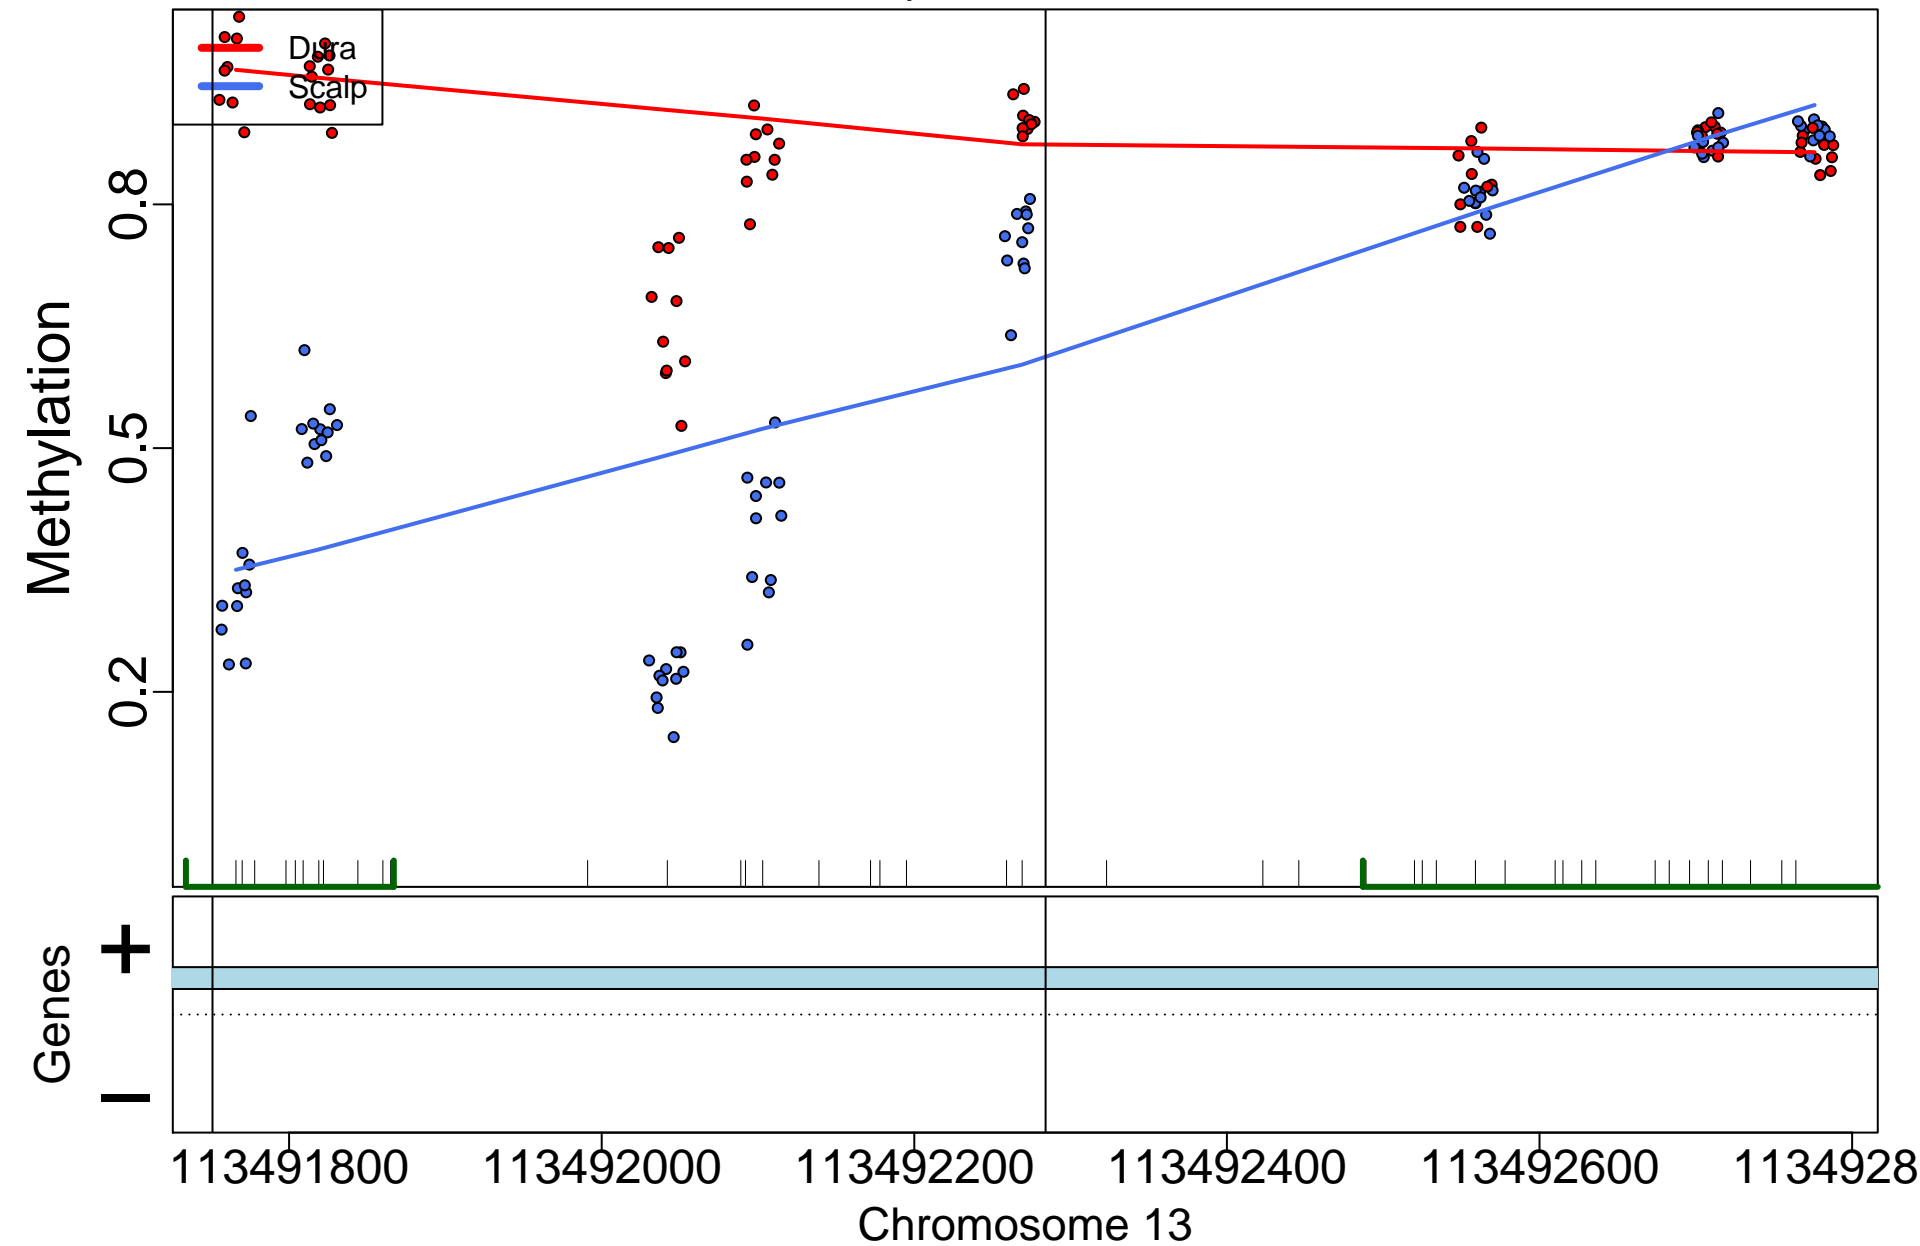

NR2F2; 168bp from tss:covers exon(s)

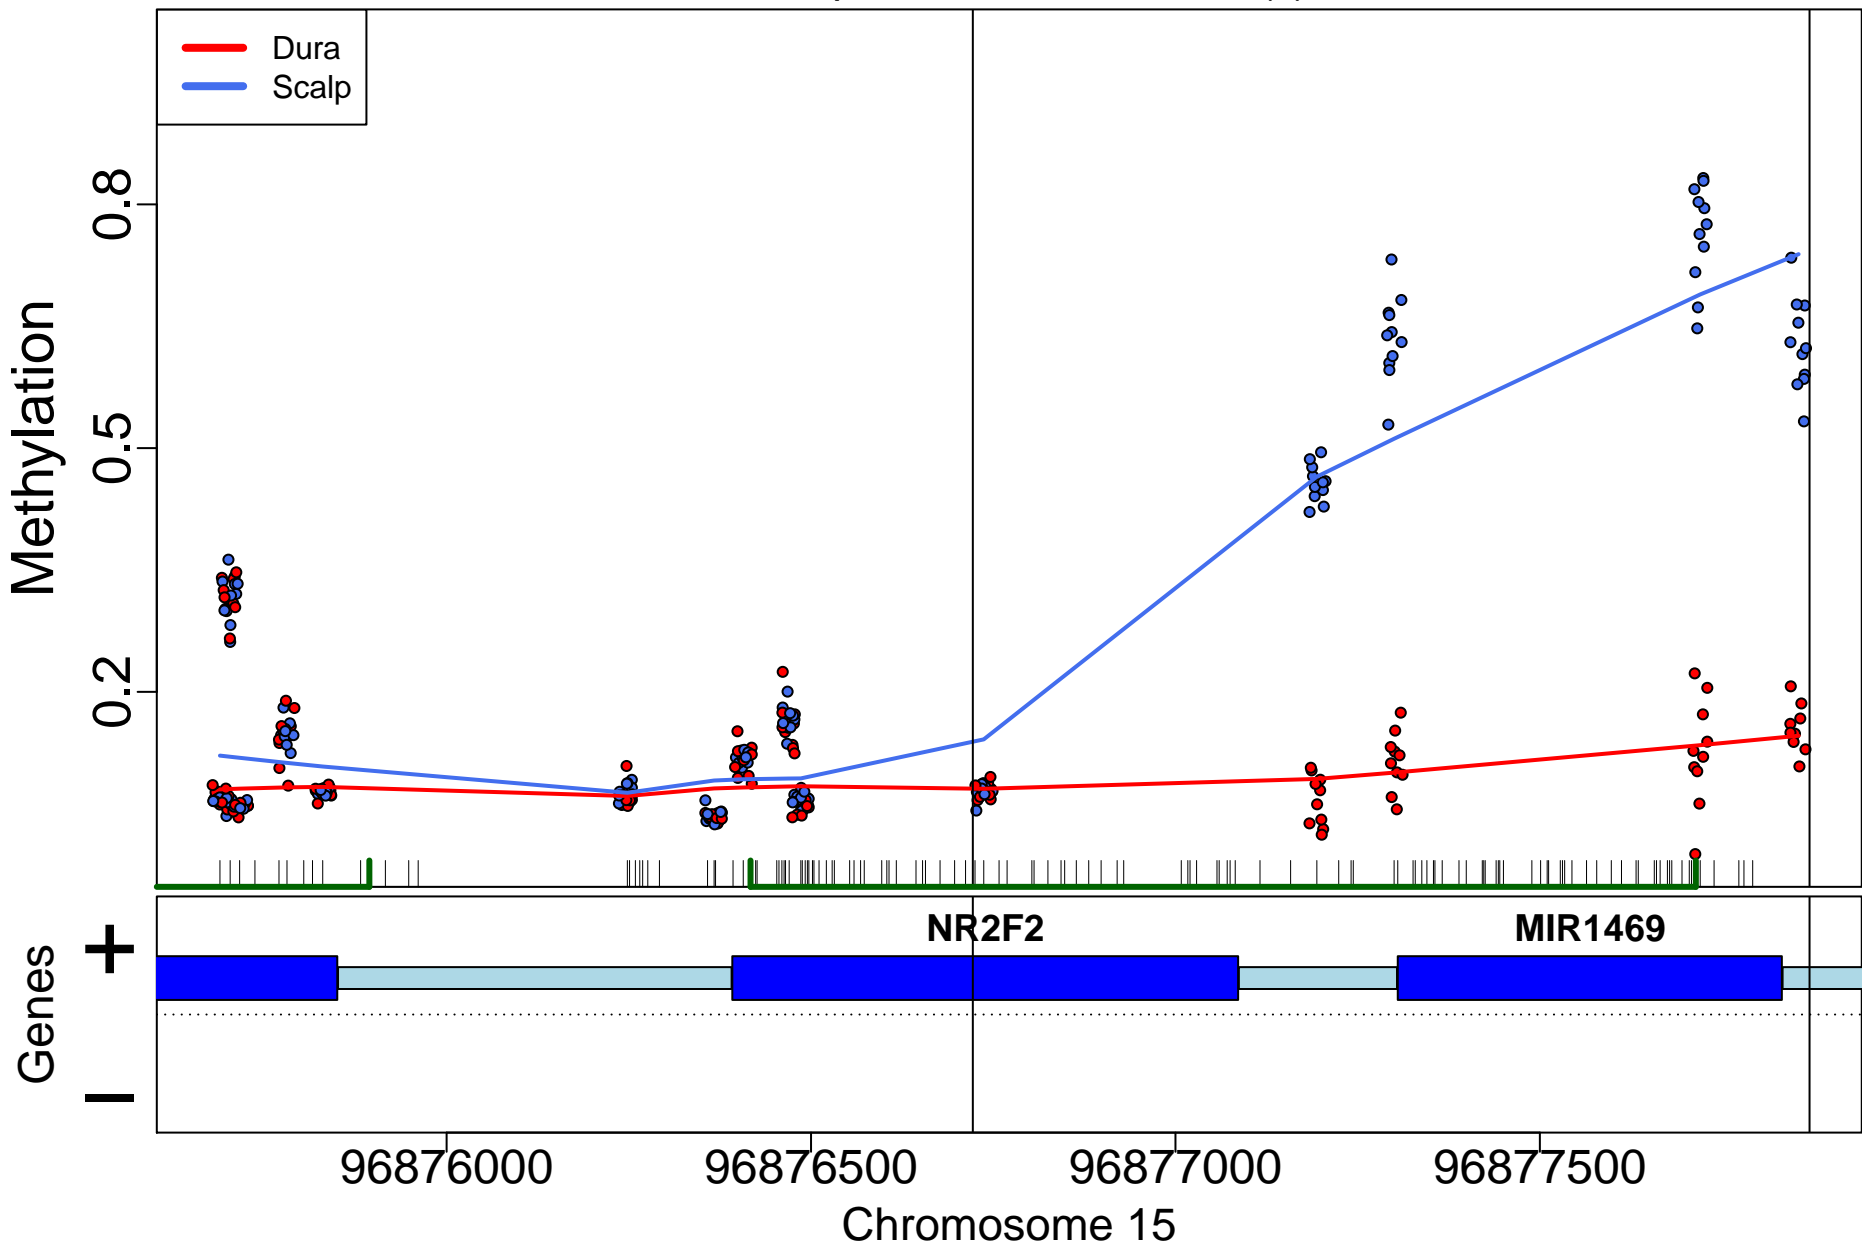

ZIC5; 12668bp from tss:downstream

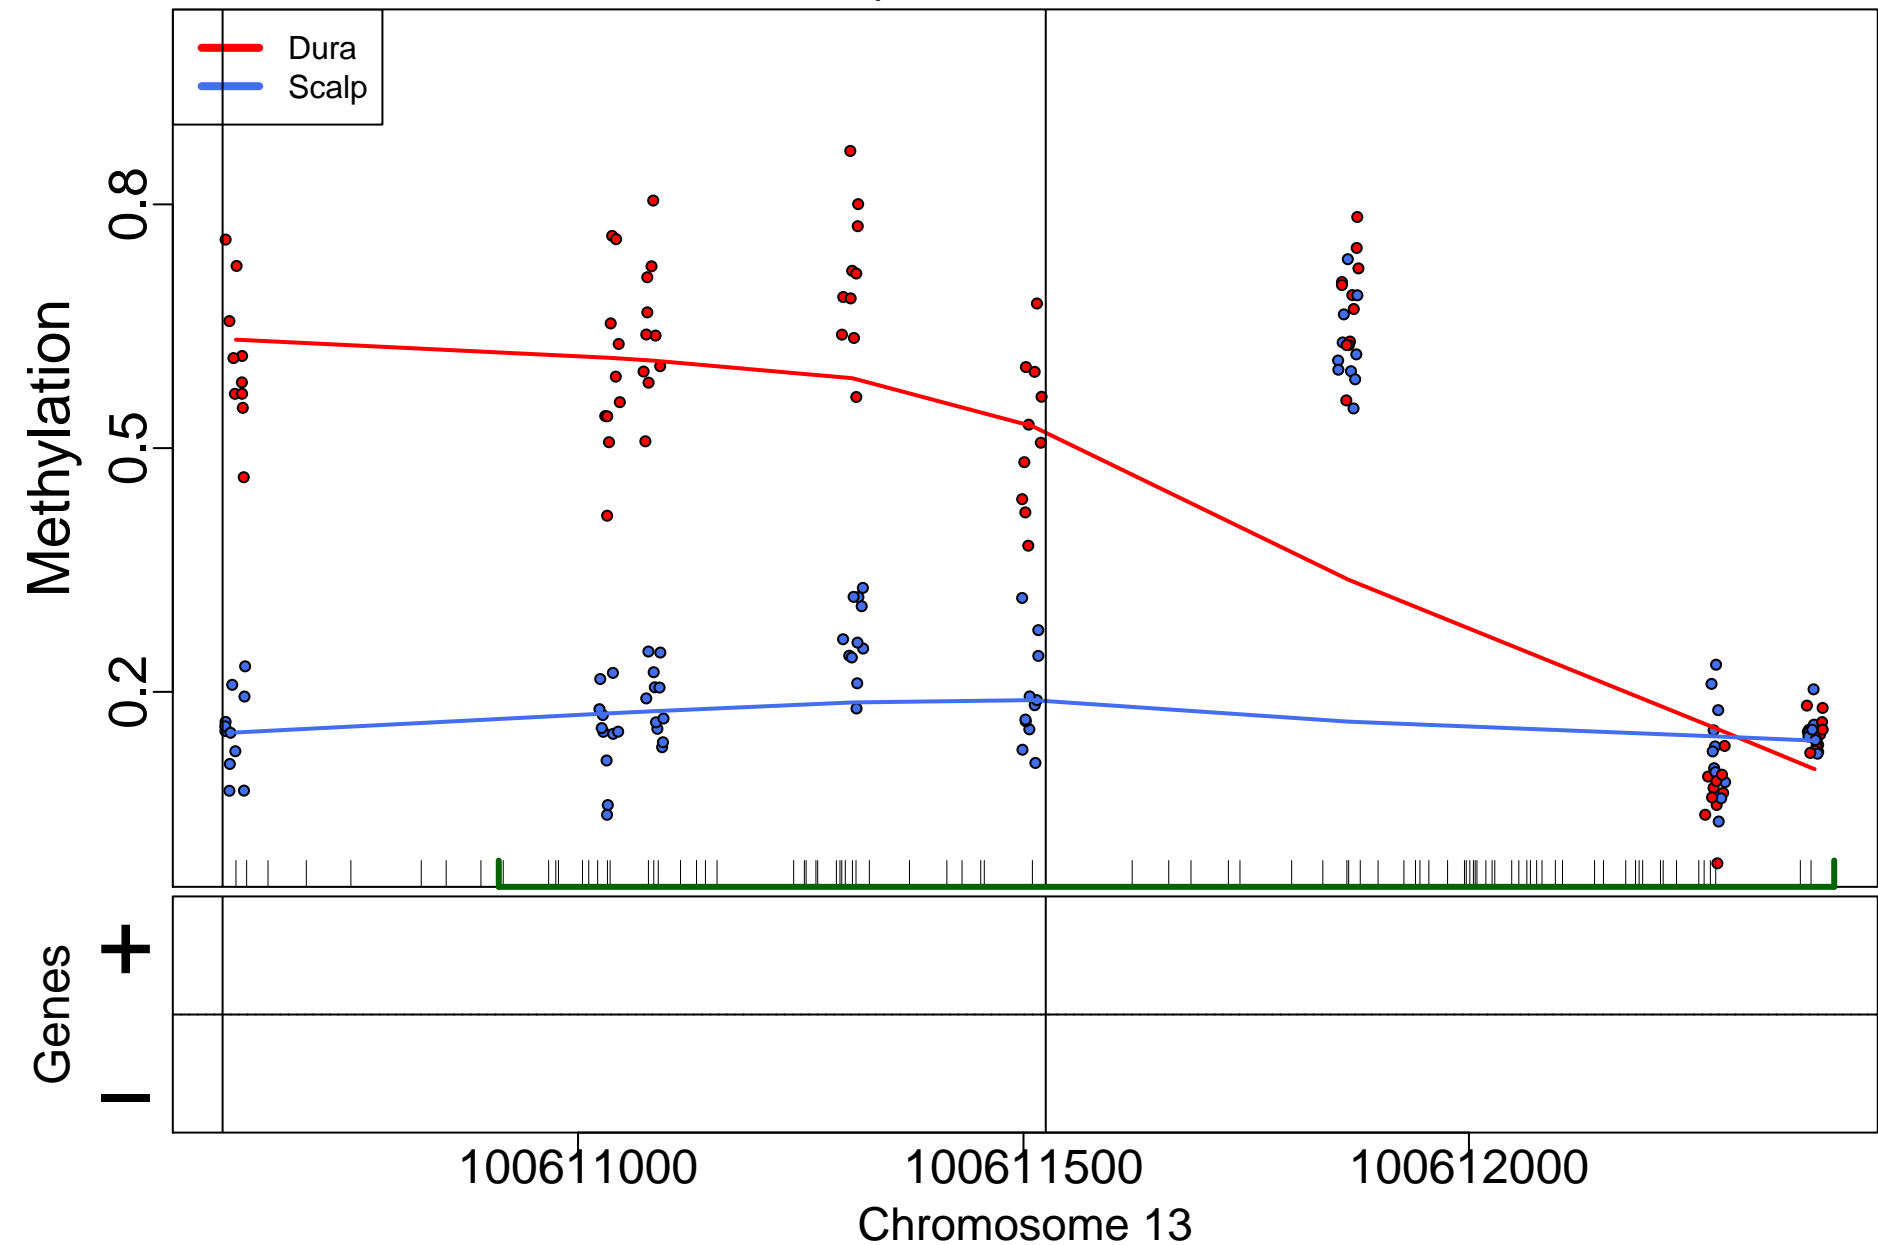

DIP2C; 6129bp from tss:inside intron

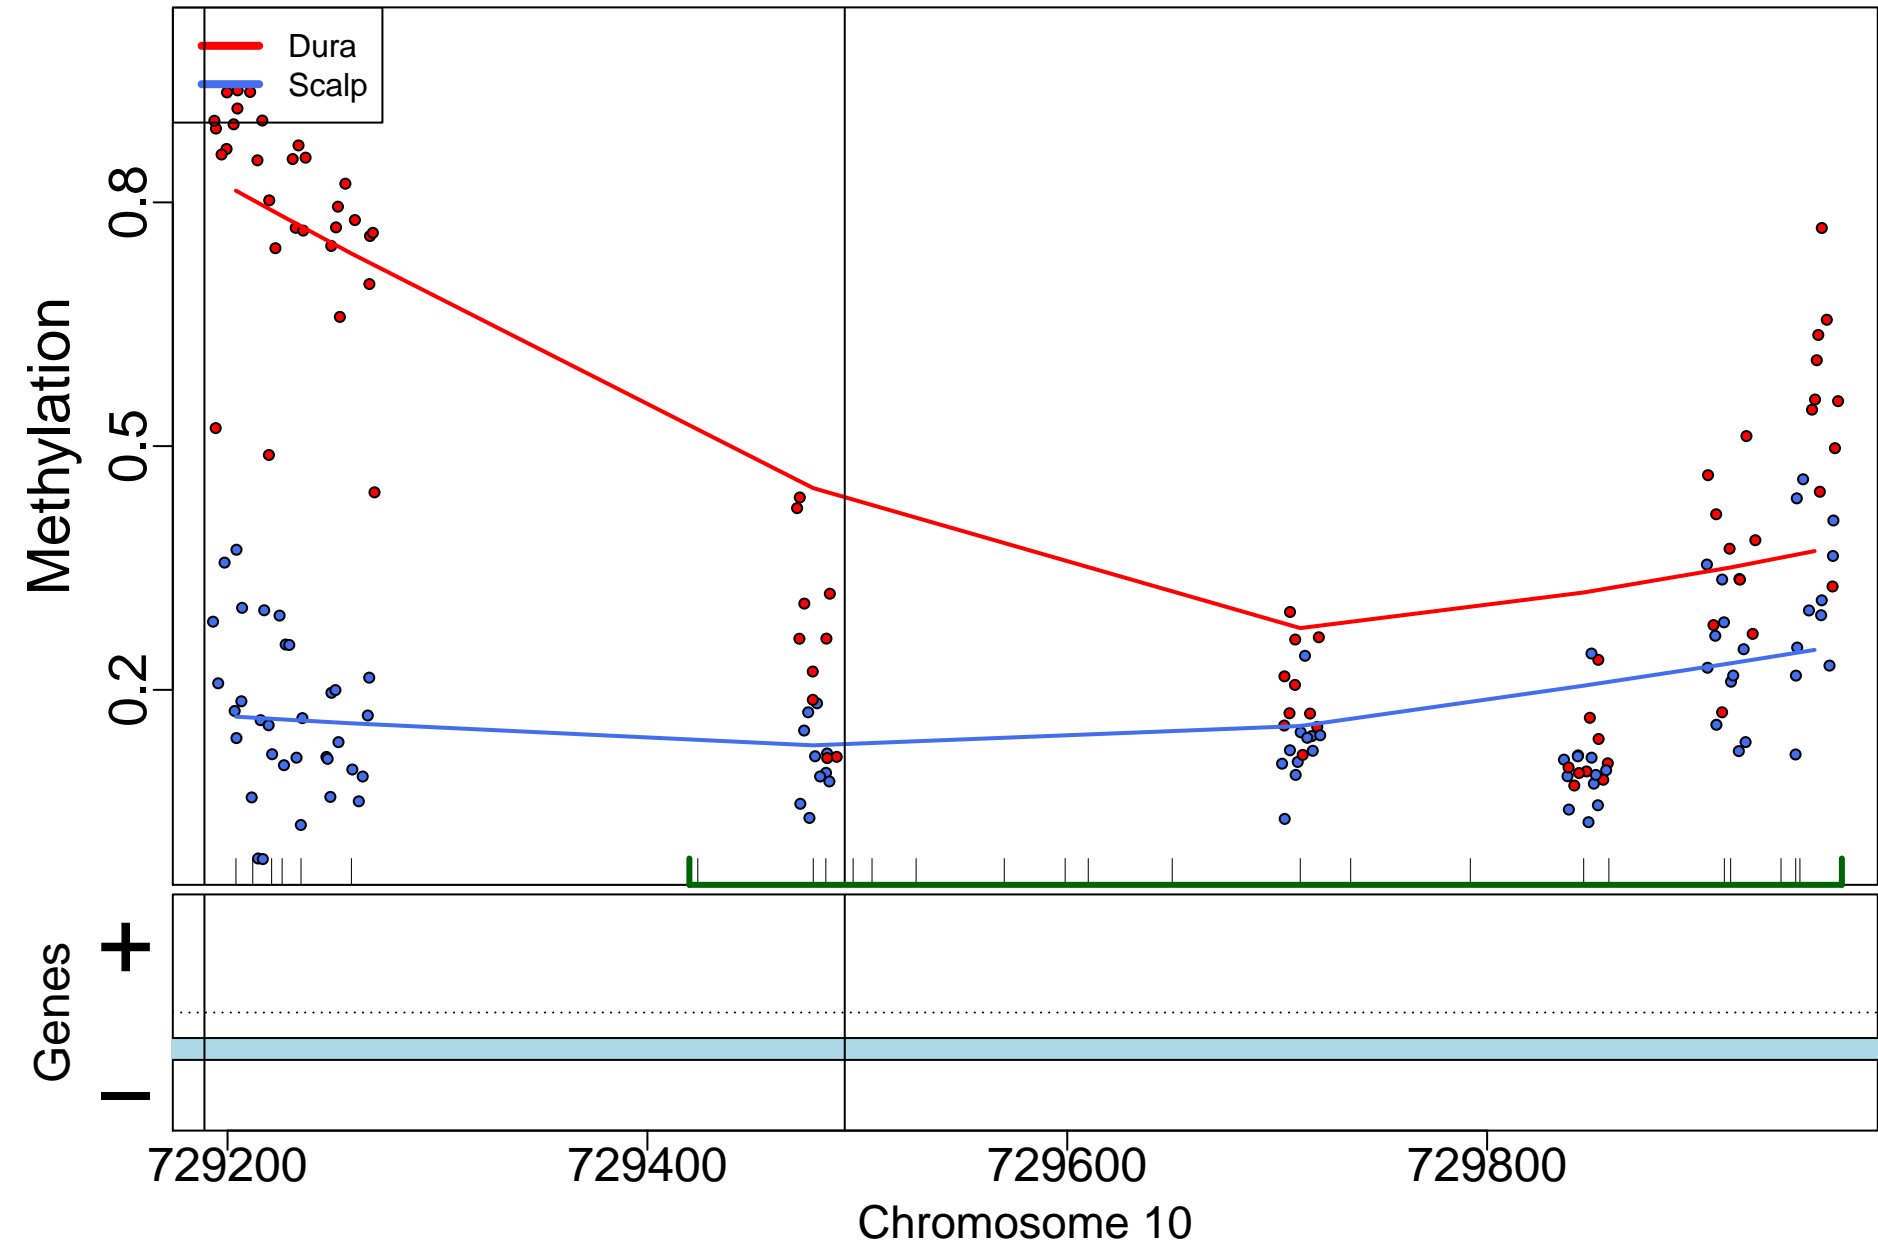

PRDM1; 92577bp from tss:upstream

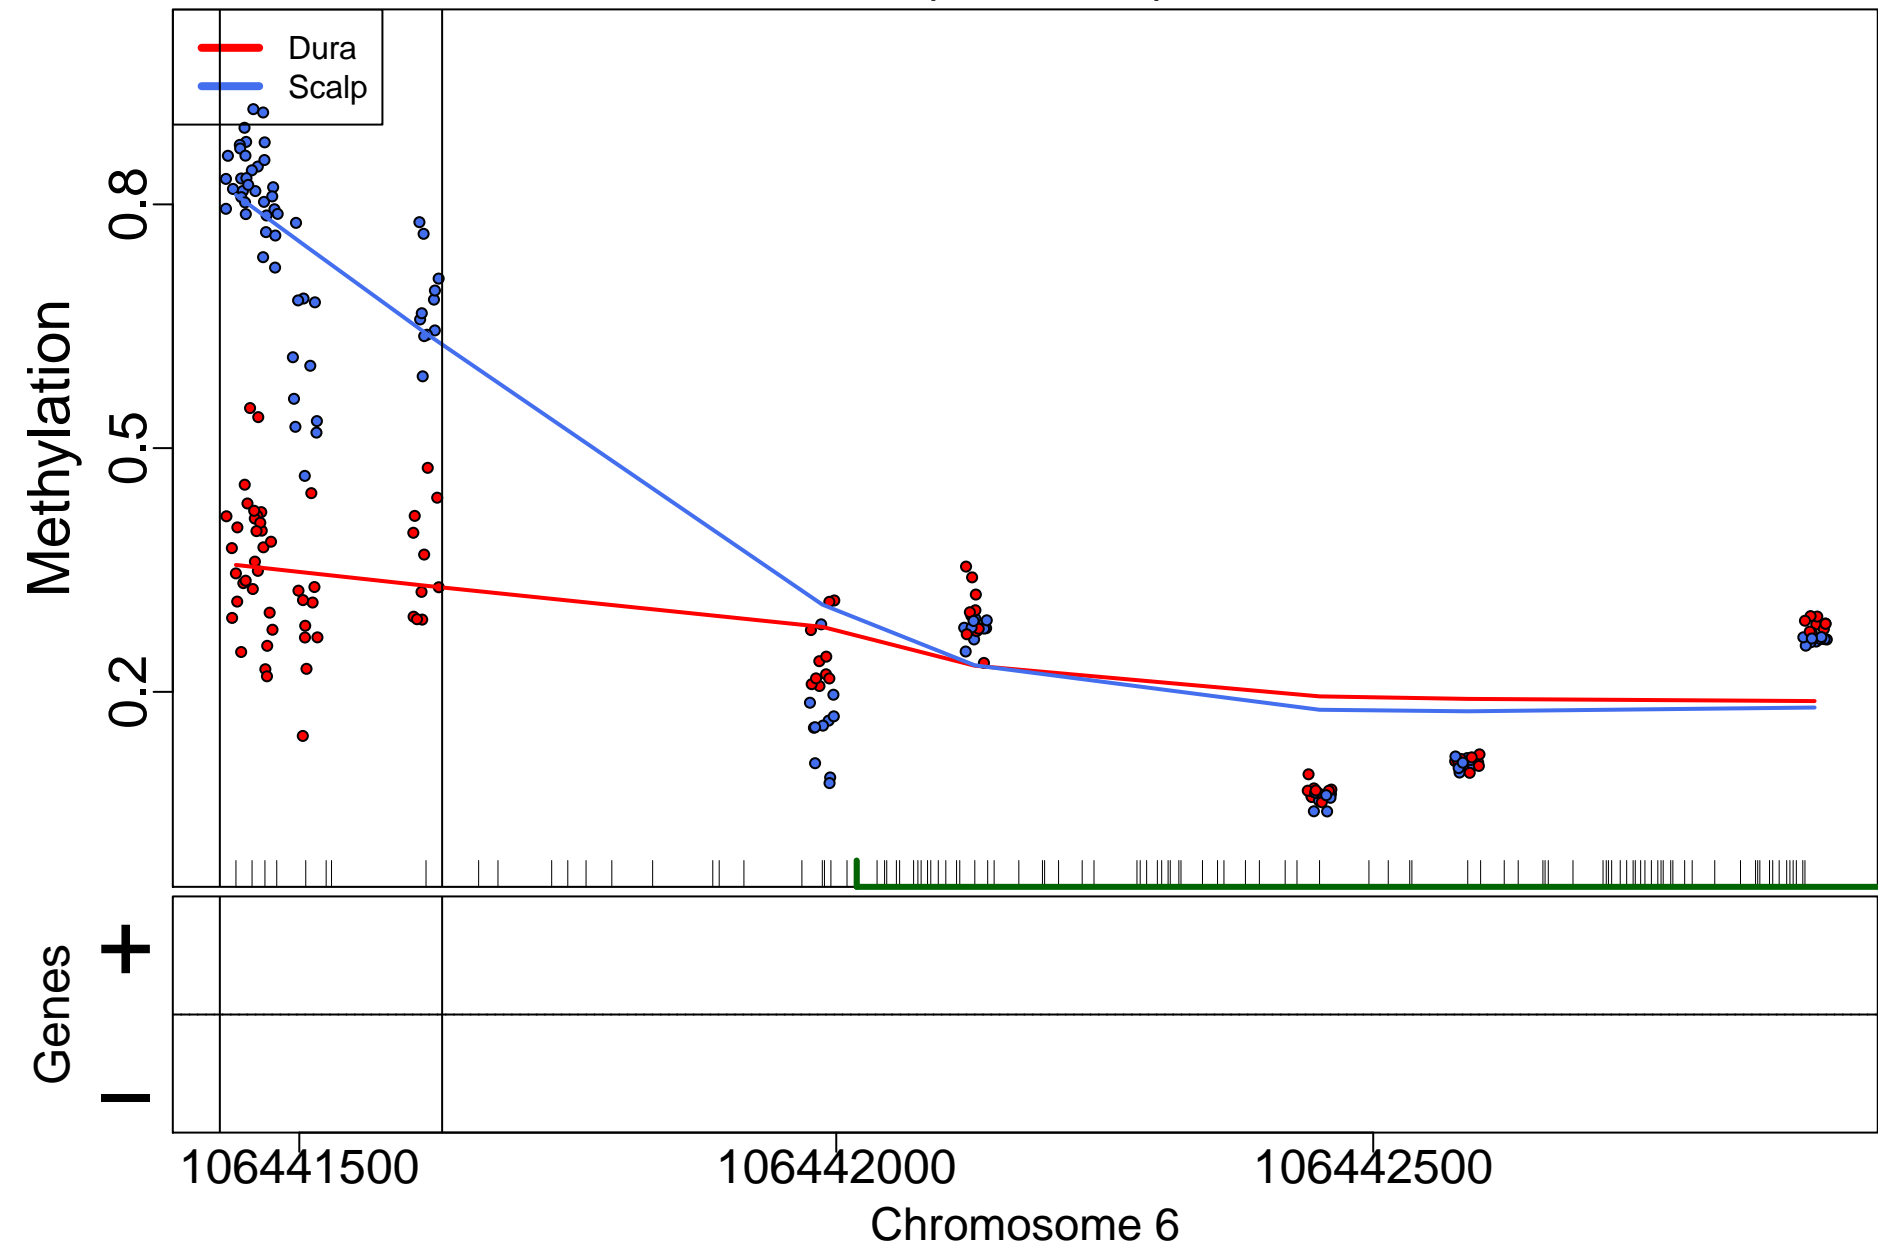

# TBKBP1; 13380bp from tss:overlaps exon upstream

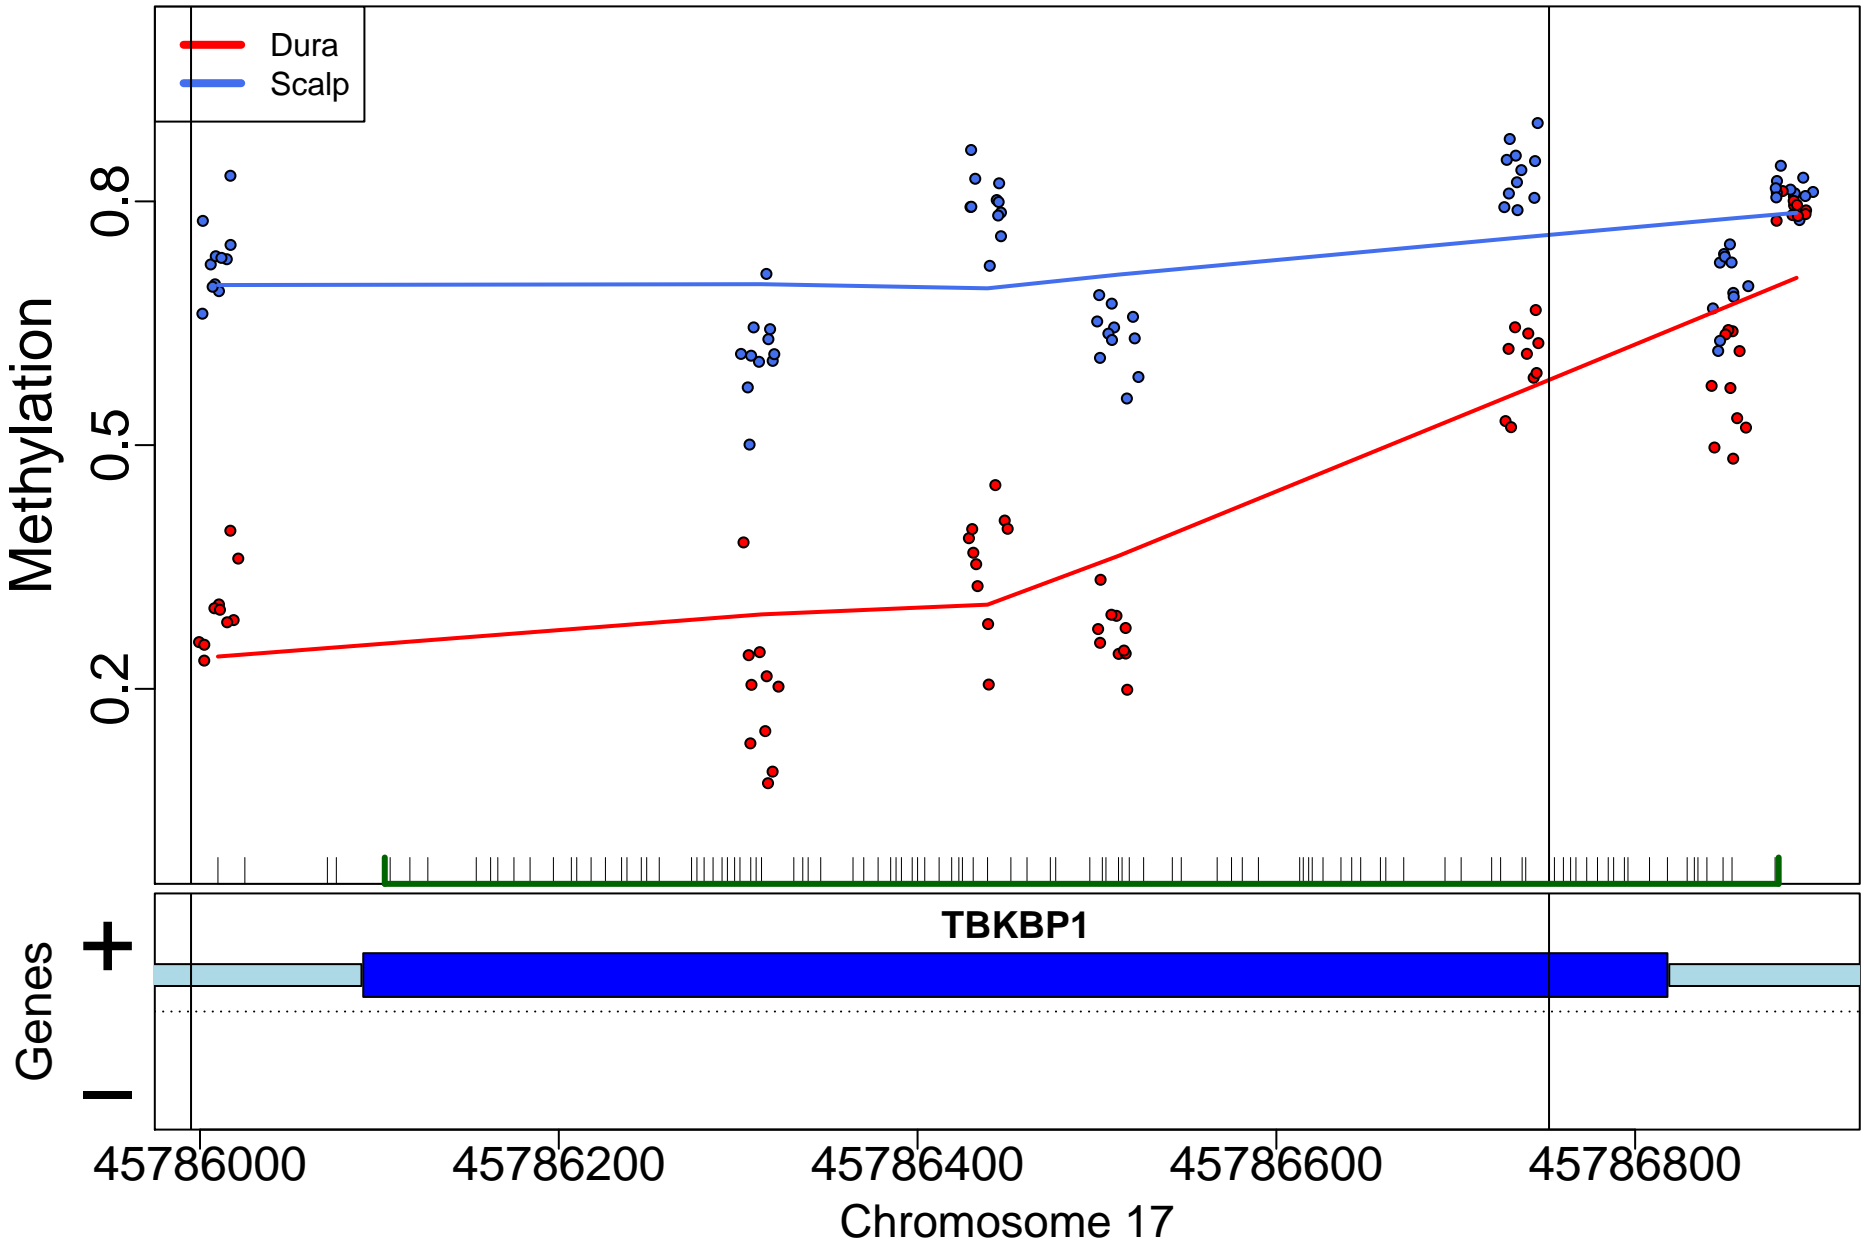

HOXB13; 3103bp from tss:inside exon

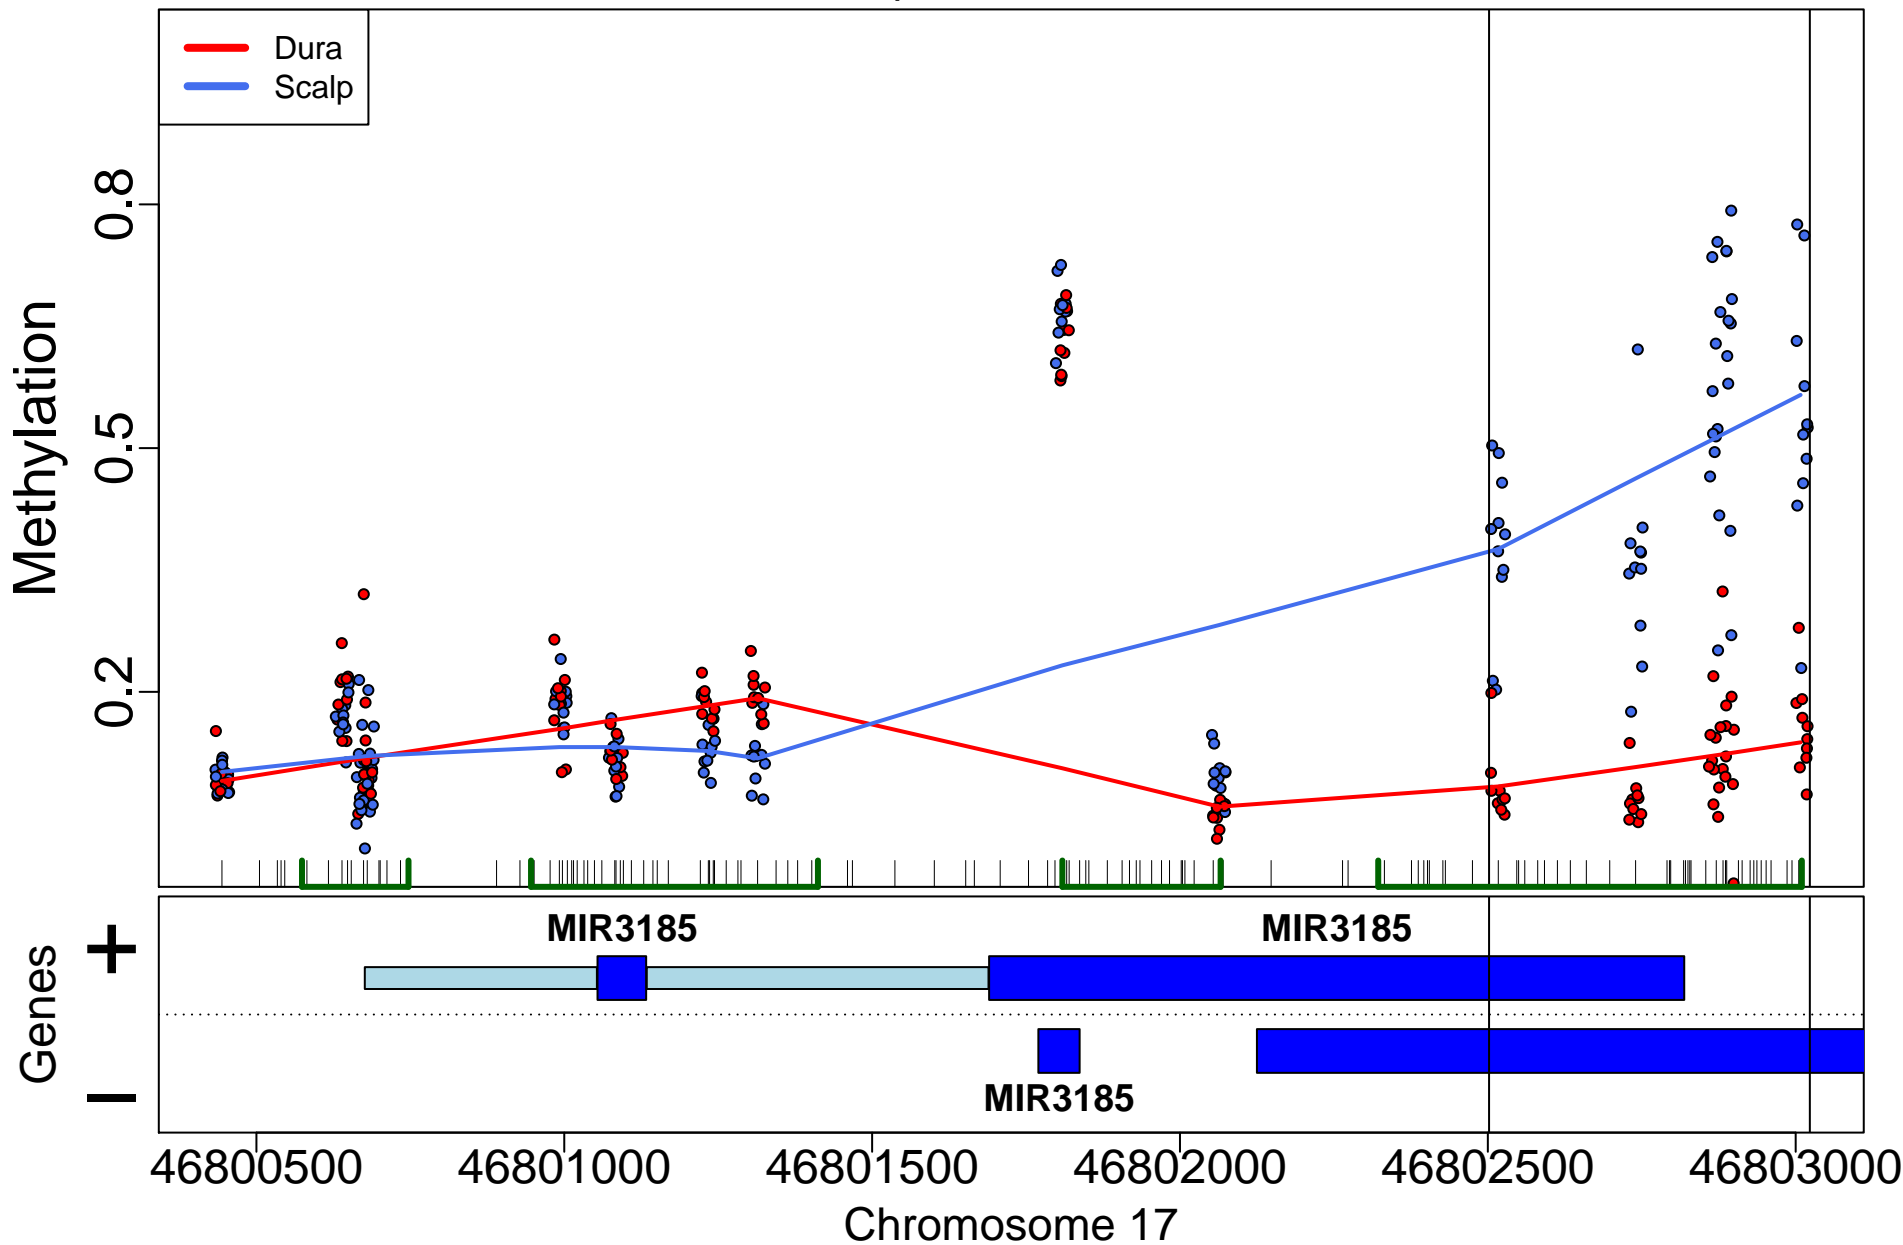



## C7orf50; 25492bp from tss:inside intron

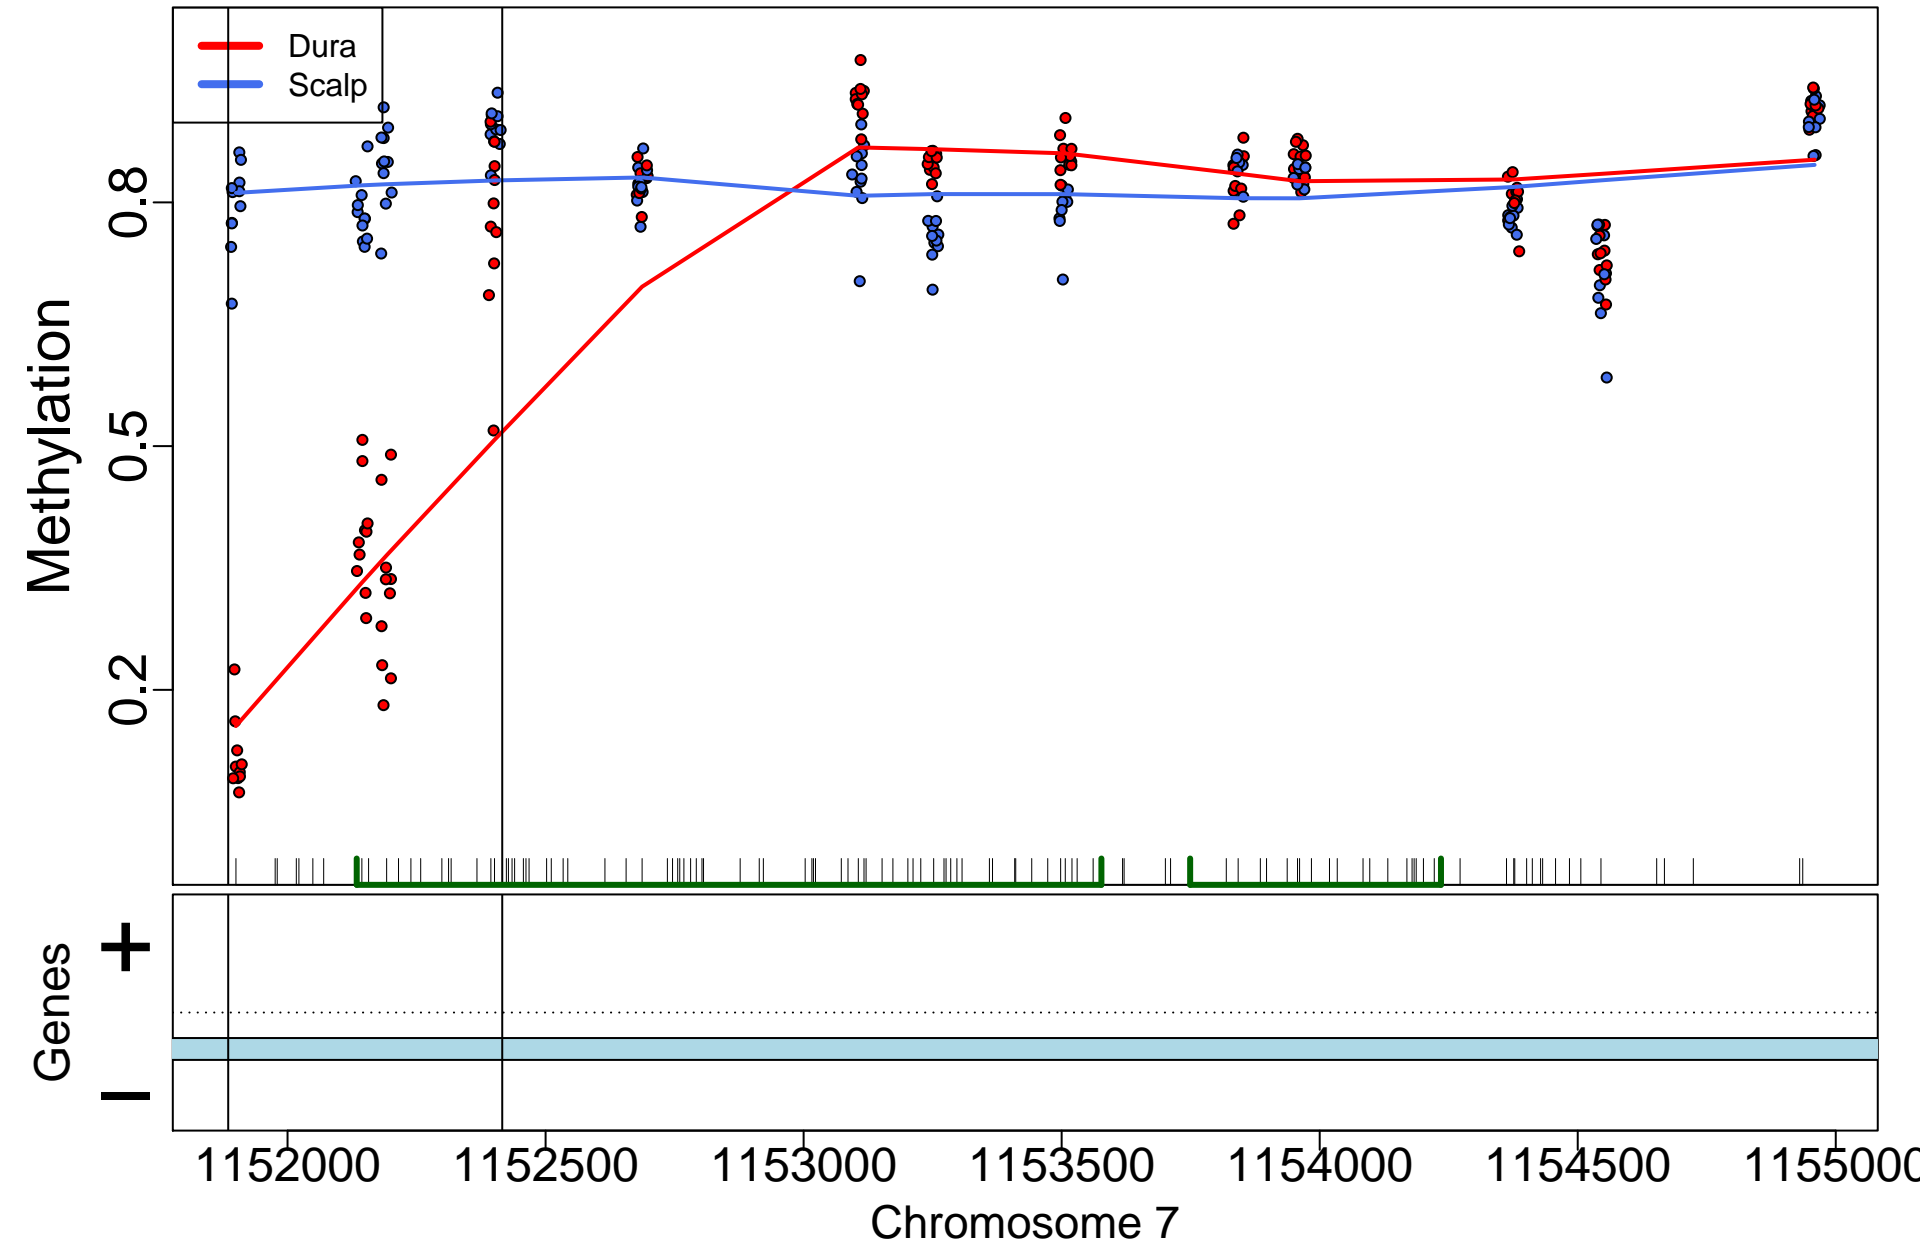

PROX1; 3713bp from tss:upstream

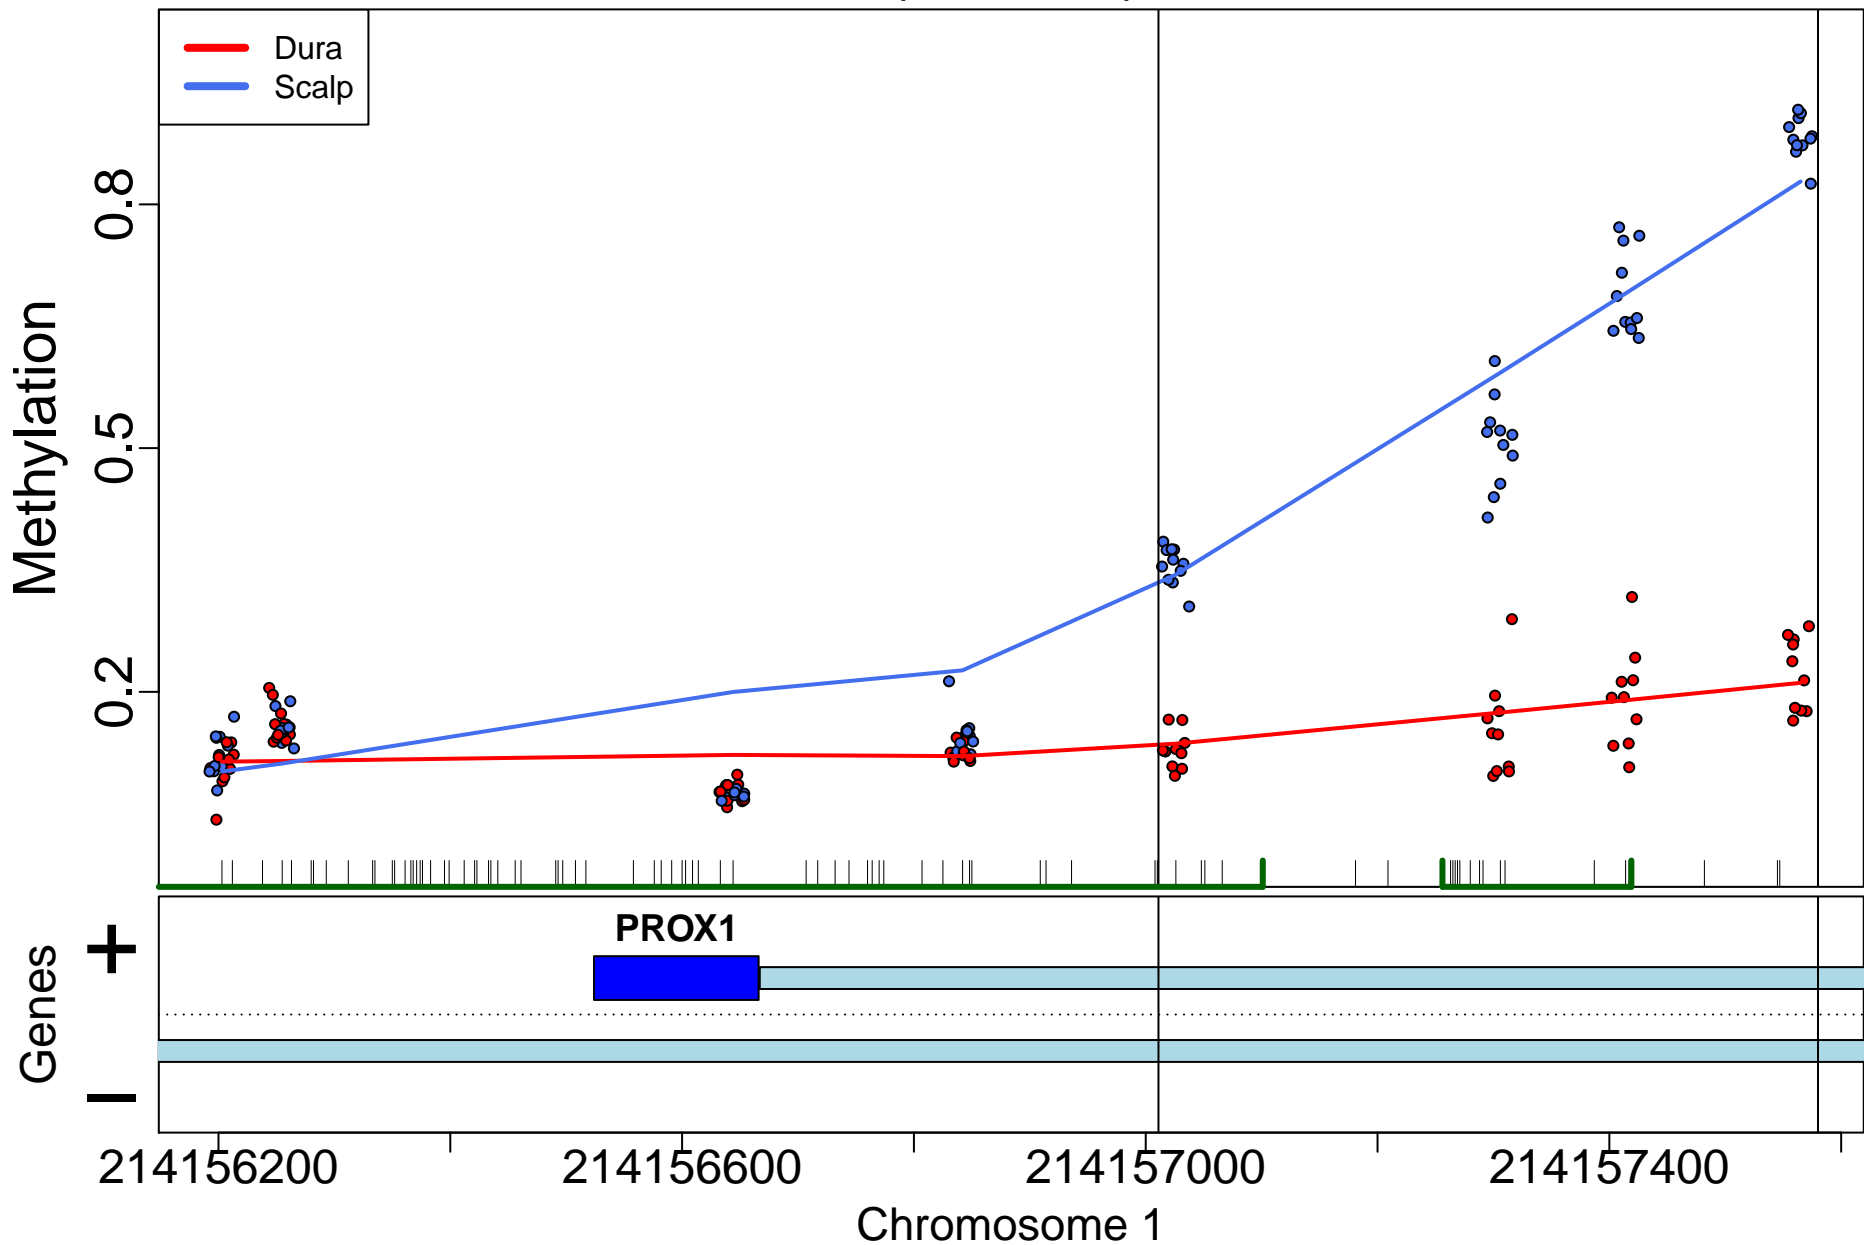

DIP2C; 268730bp from tss:inside intron

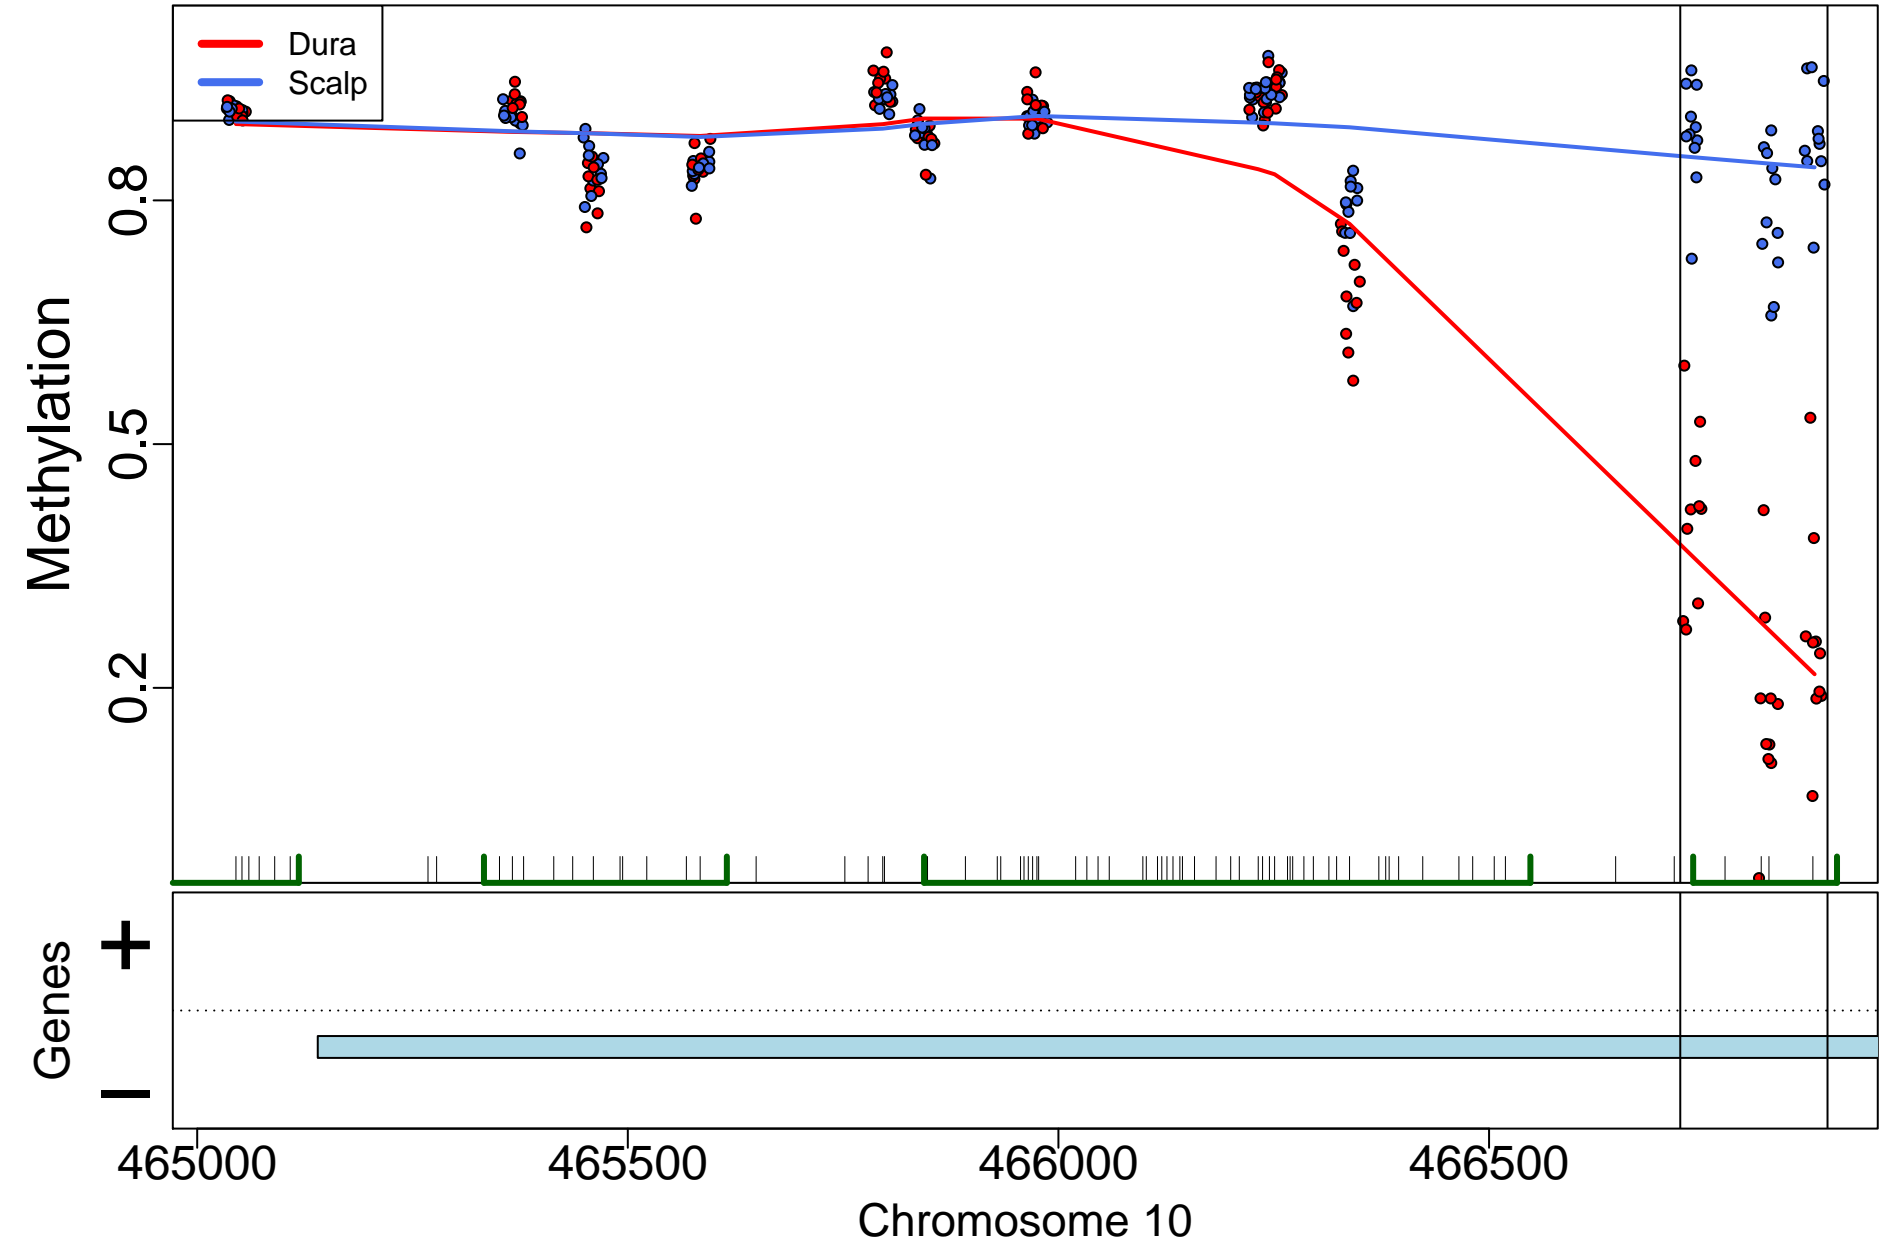

# RAX; 621bp from tss:promoter

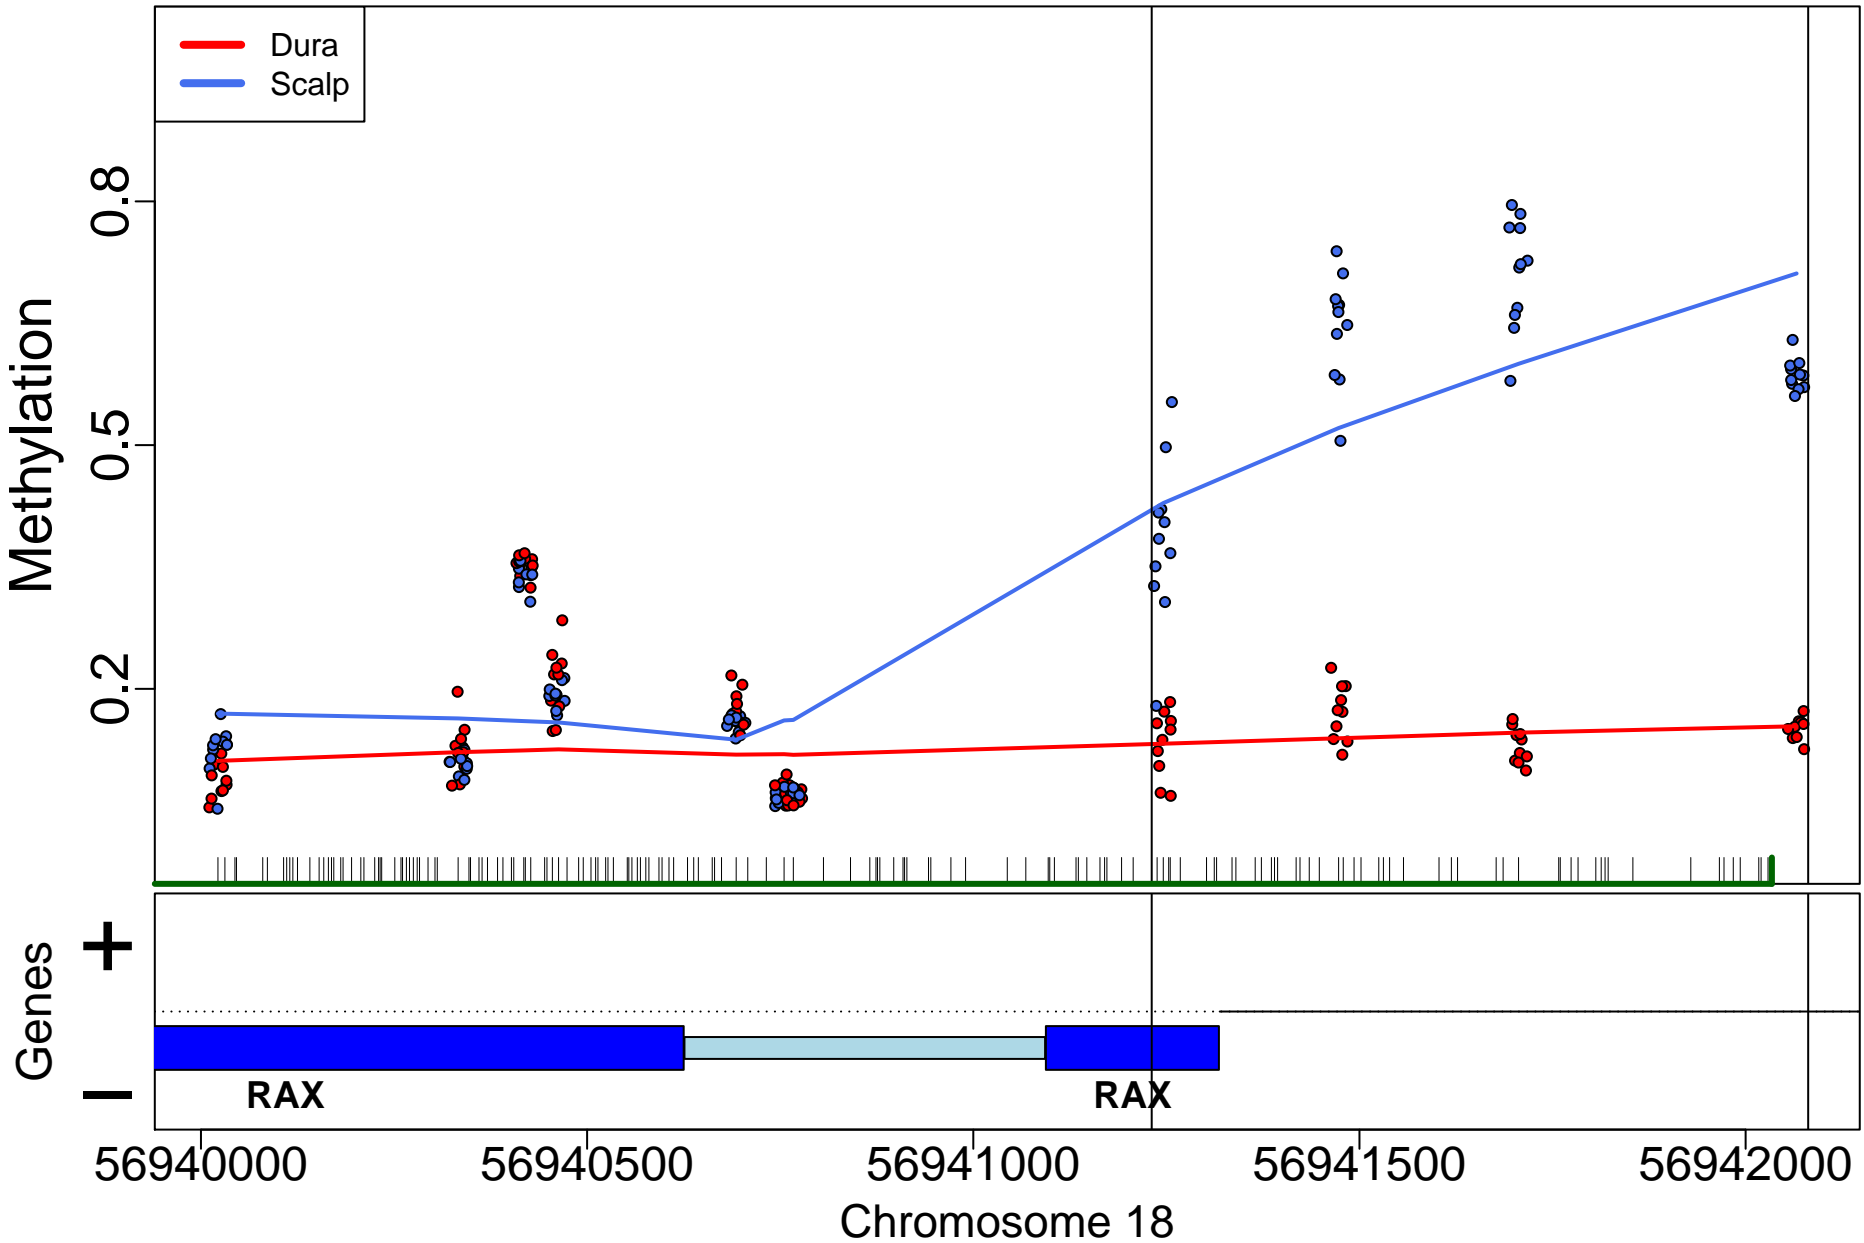

RUNX2; 1731bp from tss:inside intron

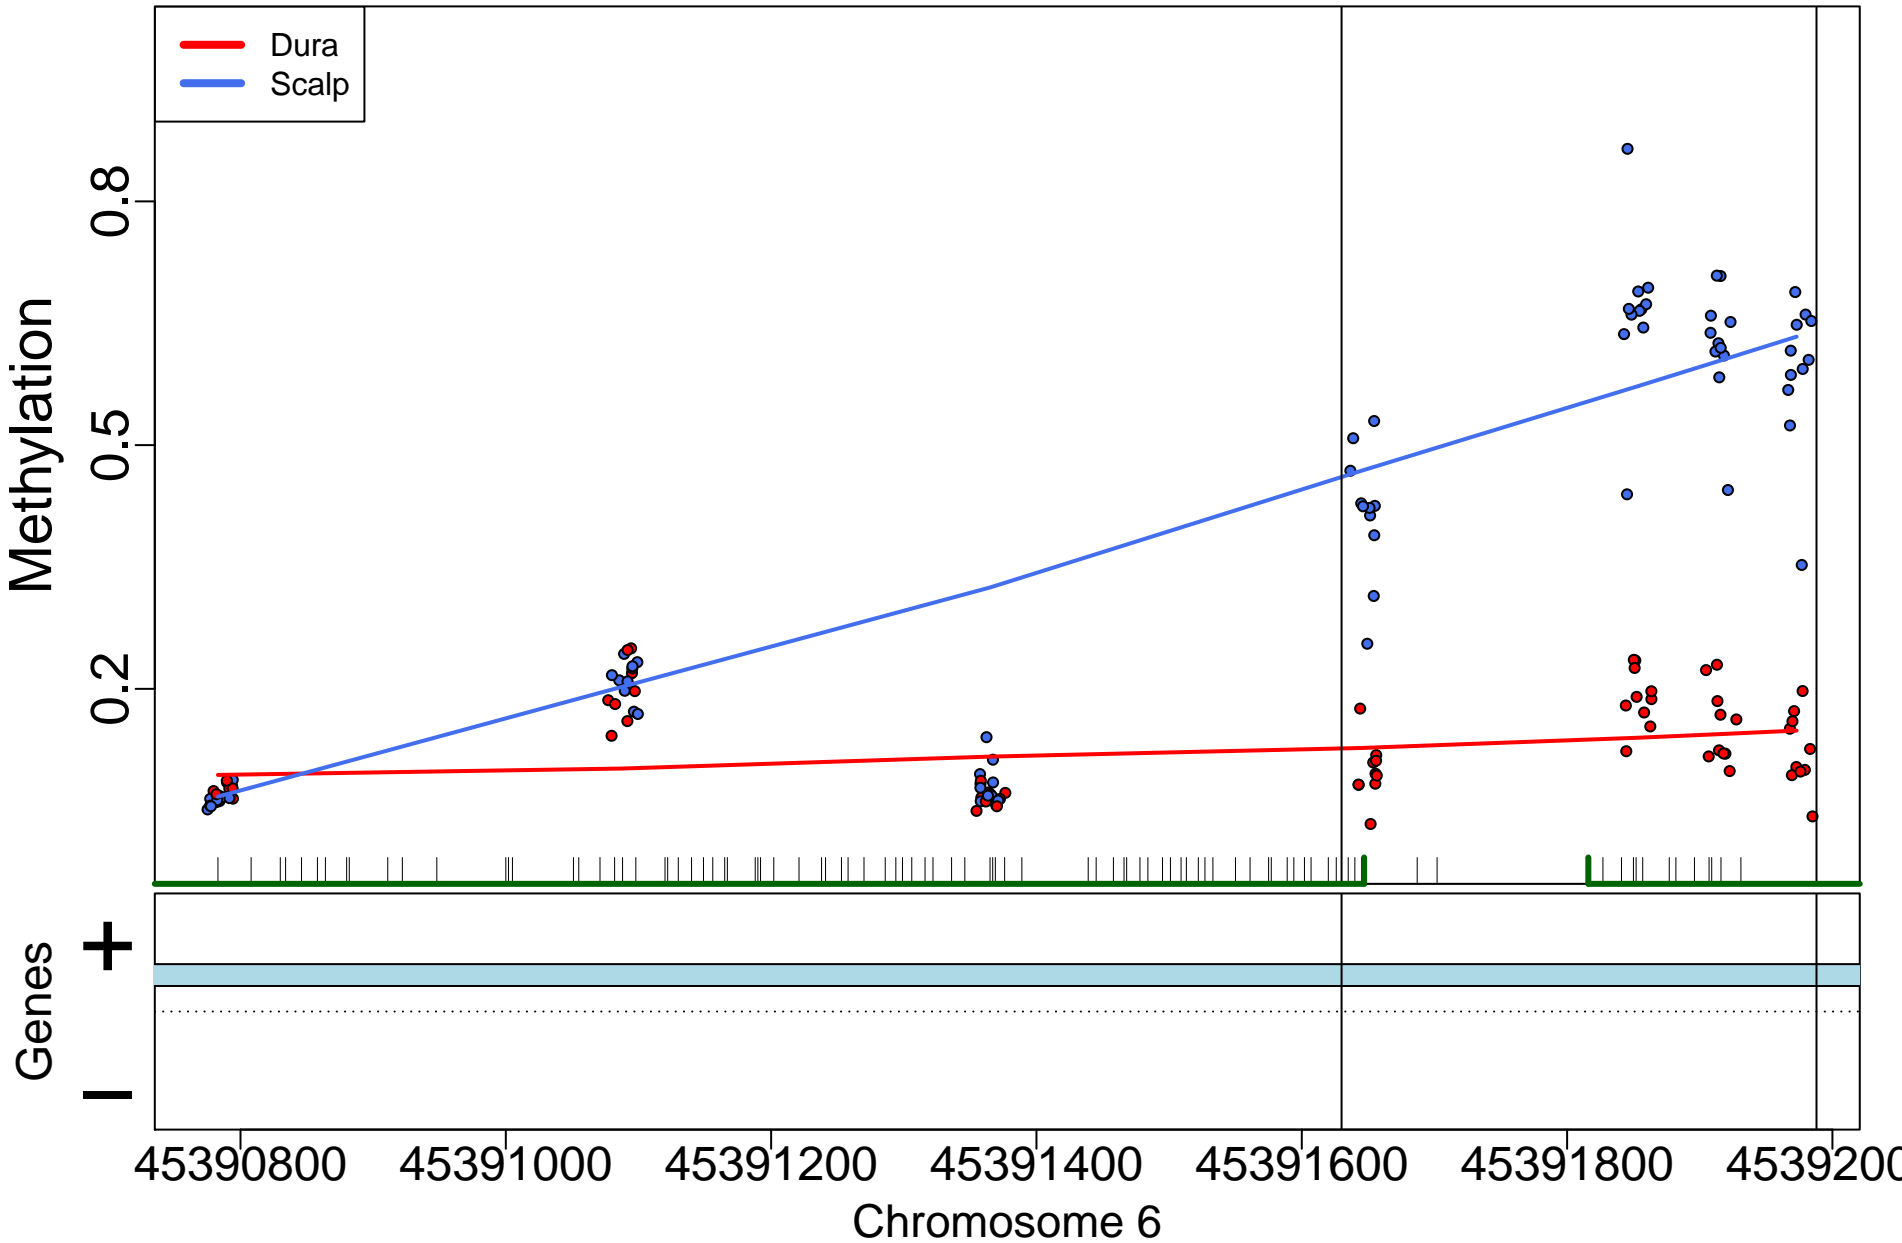

STK10; 907bp from tss:promoter

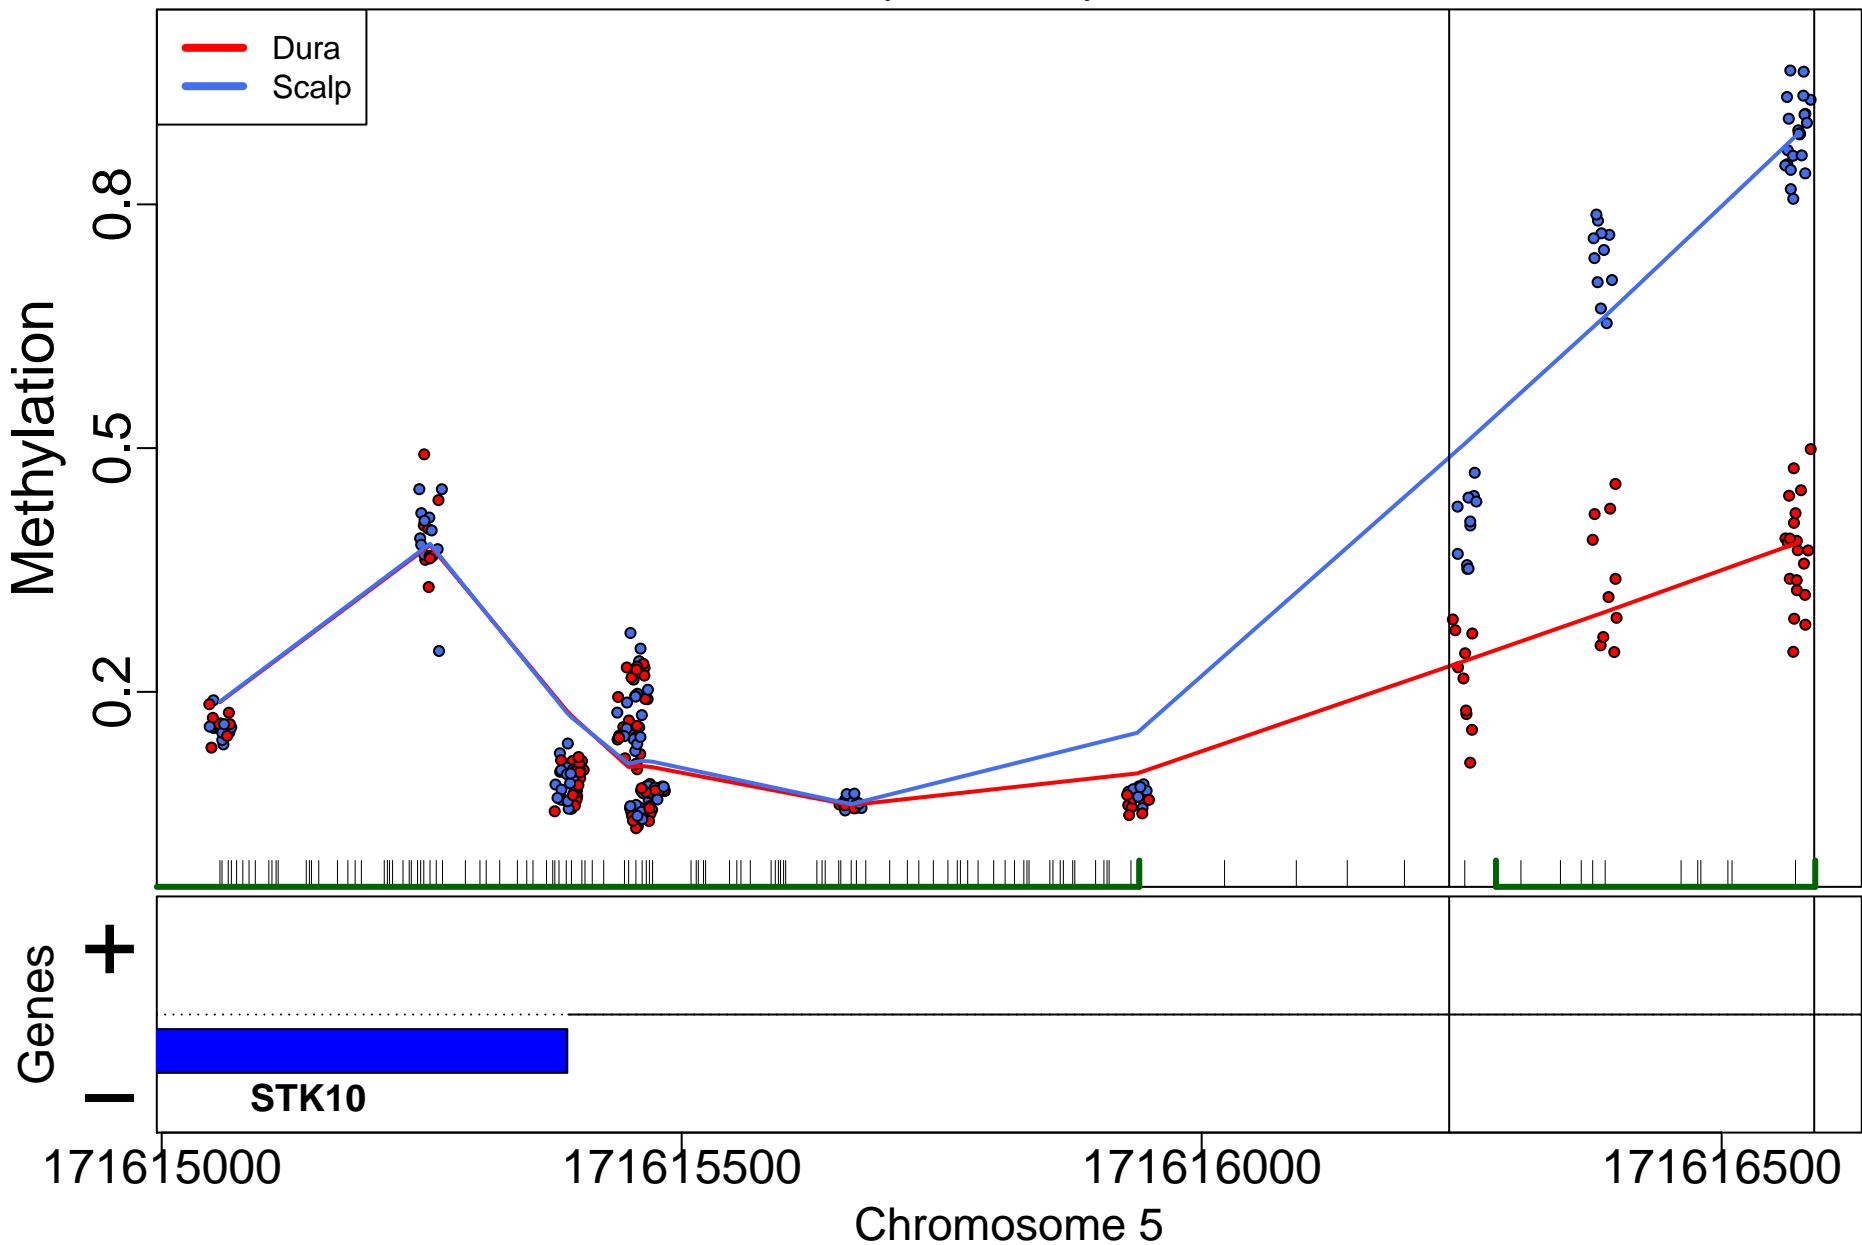

EZR; 1292bp from tss:overlaps exon downstream

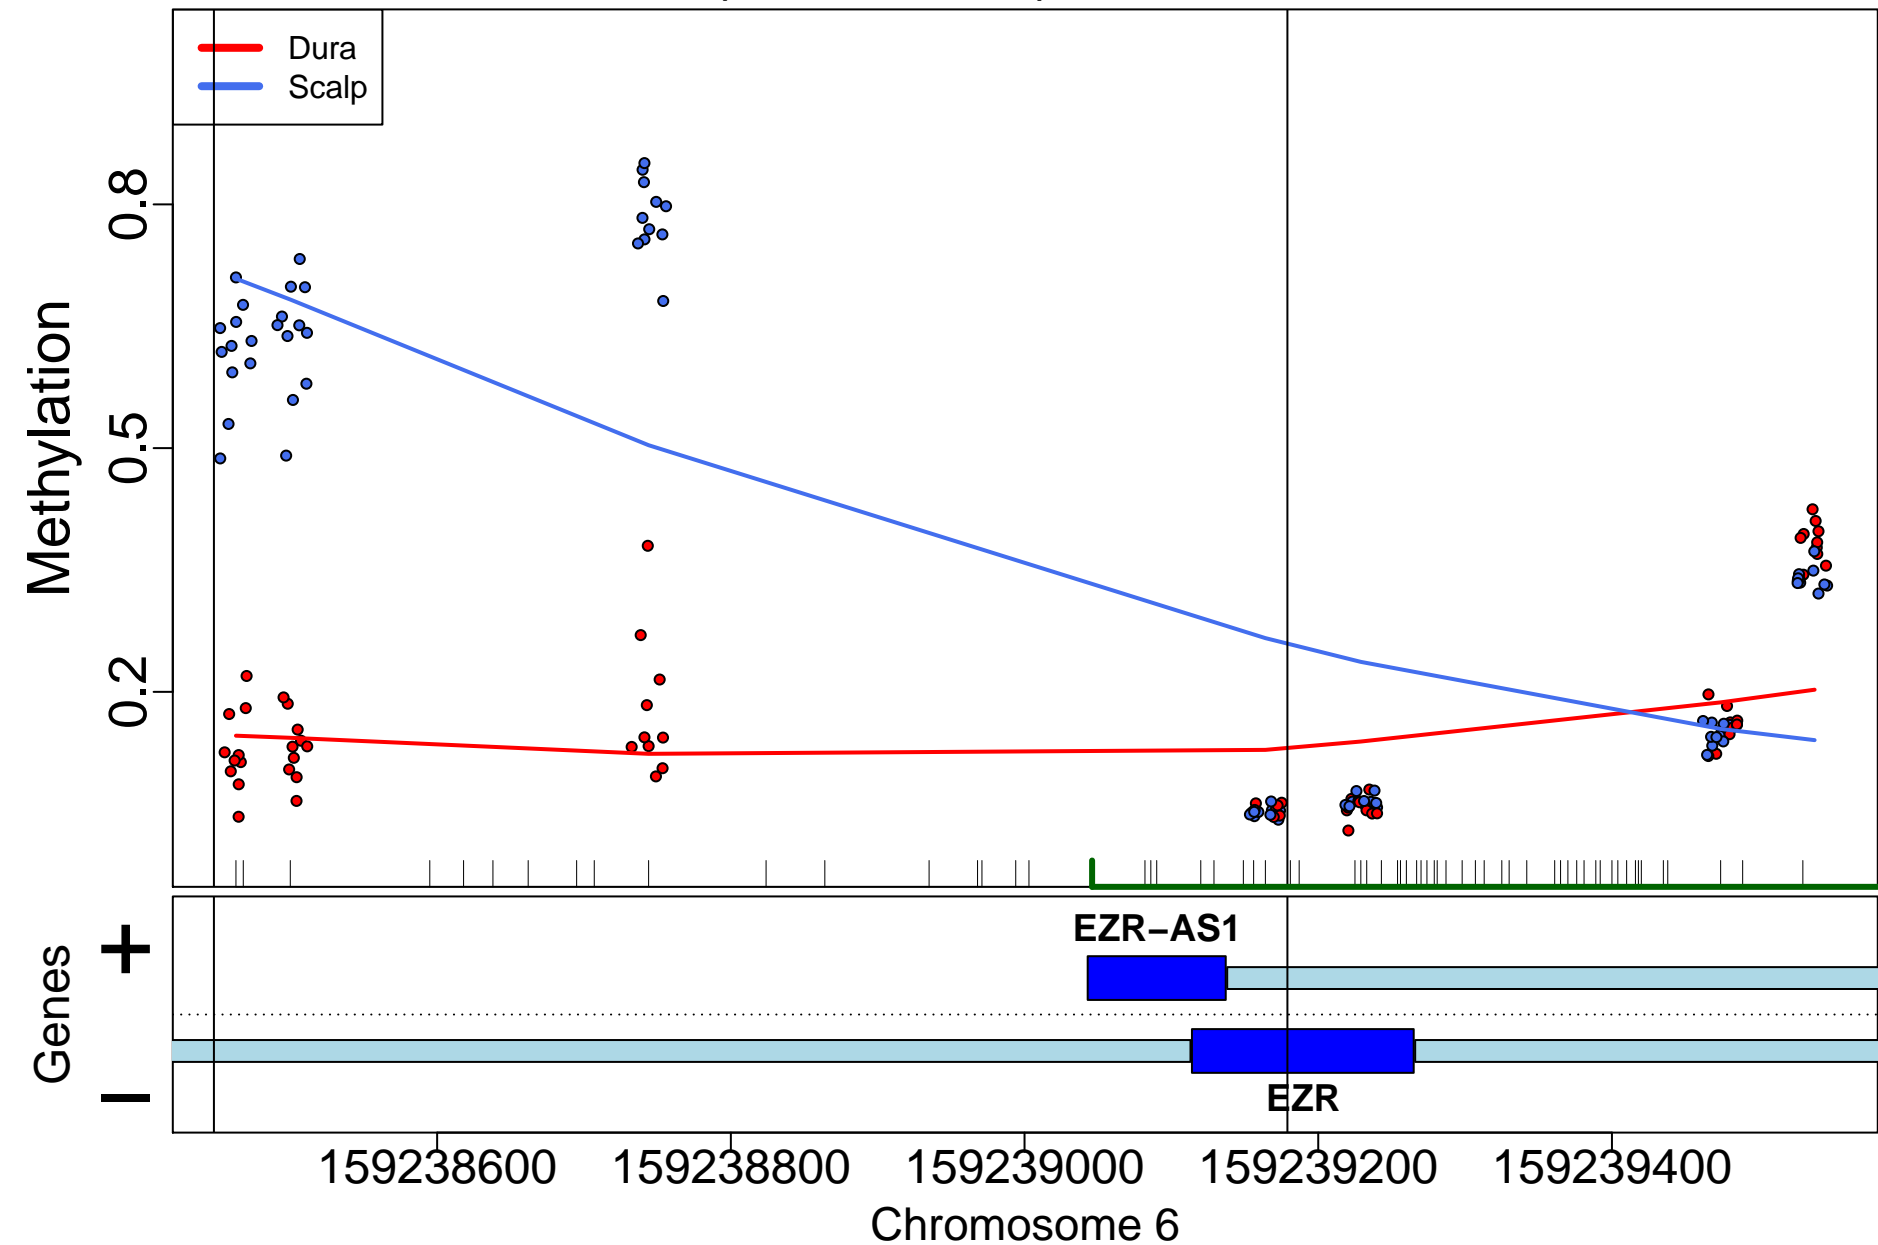

STK32C; 84379bp from tss:inside intron

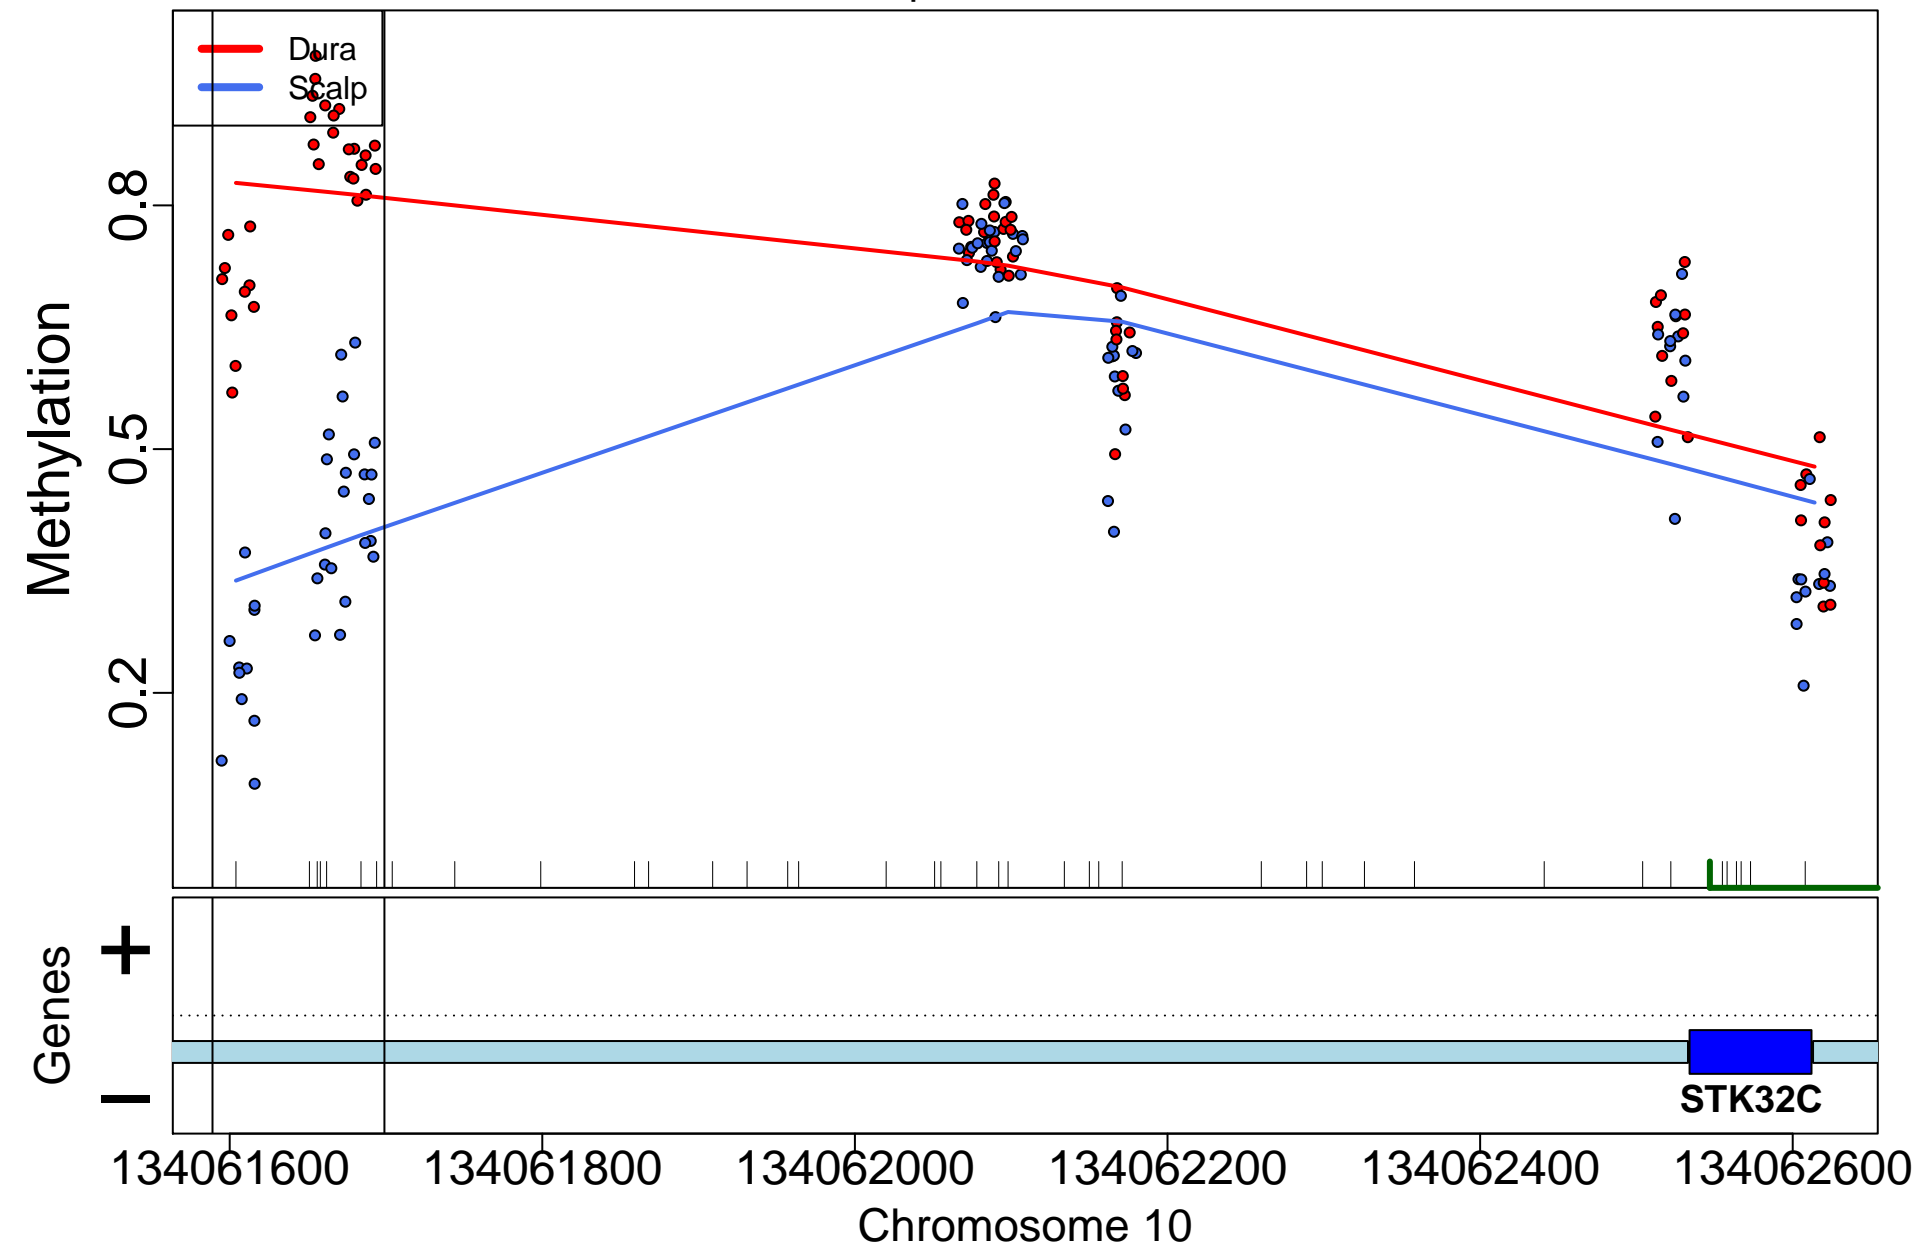



GMDS; 621148bp from tss:overlaps two exons

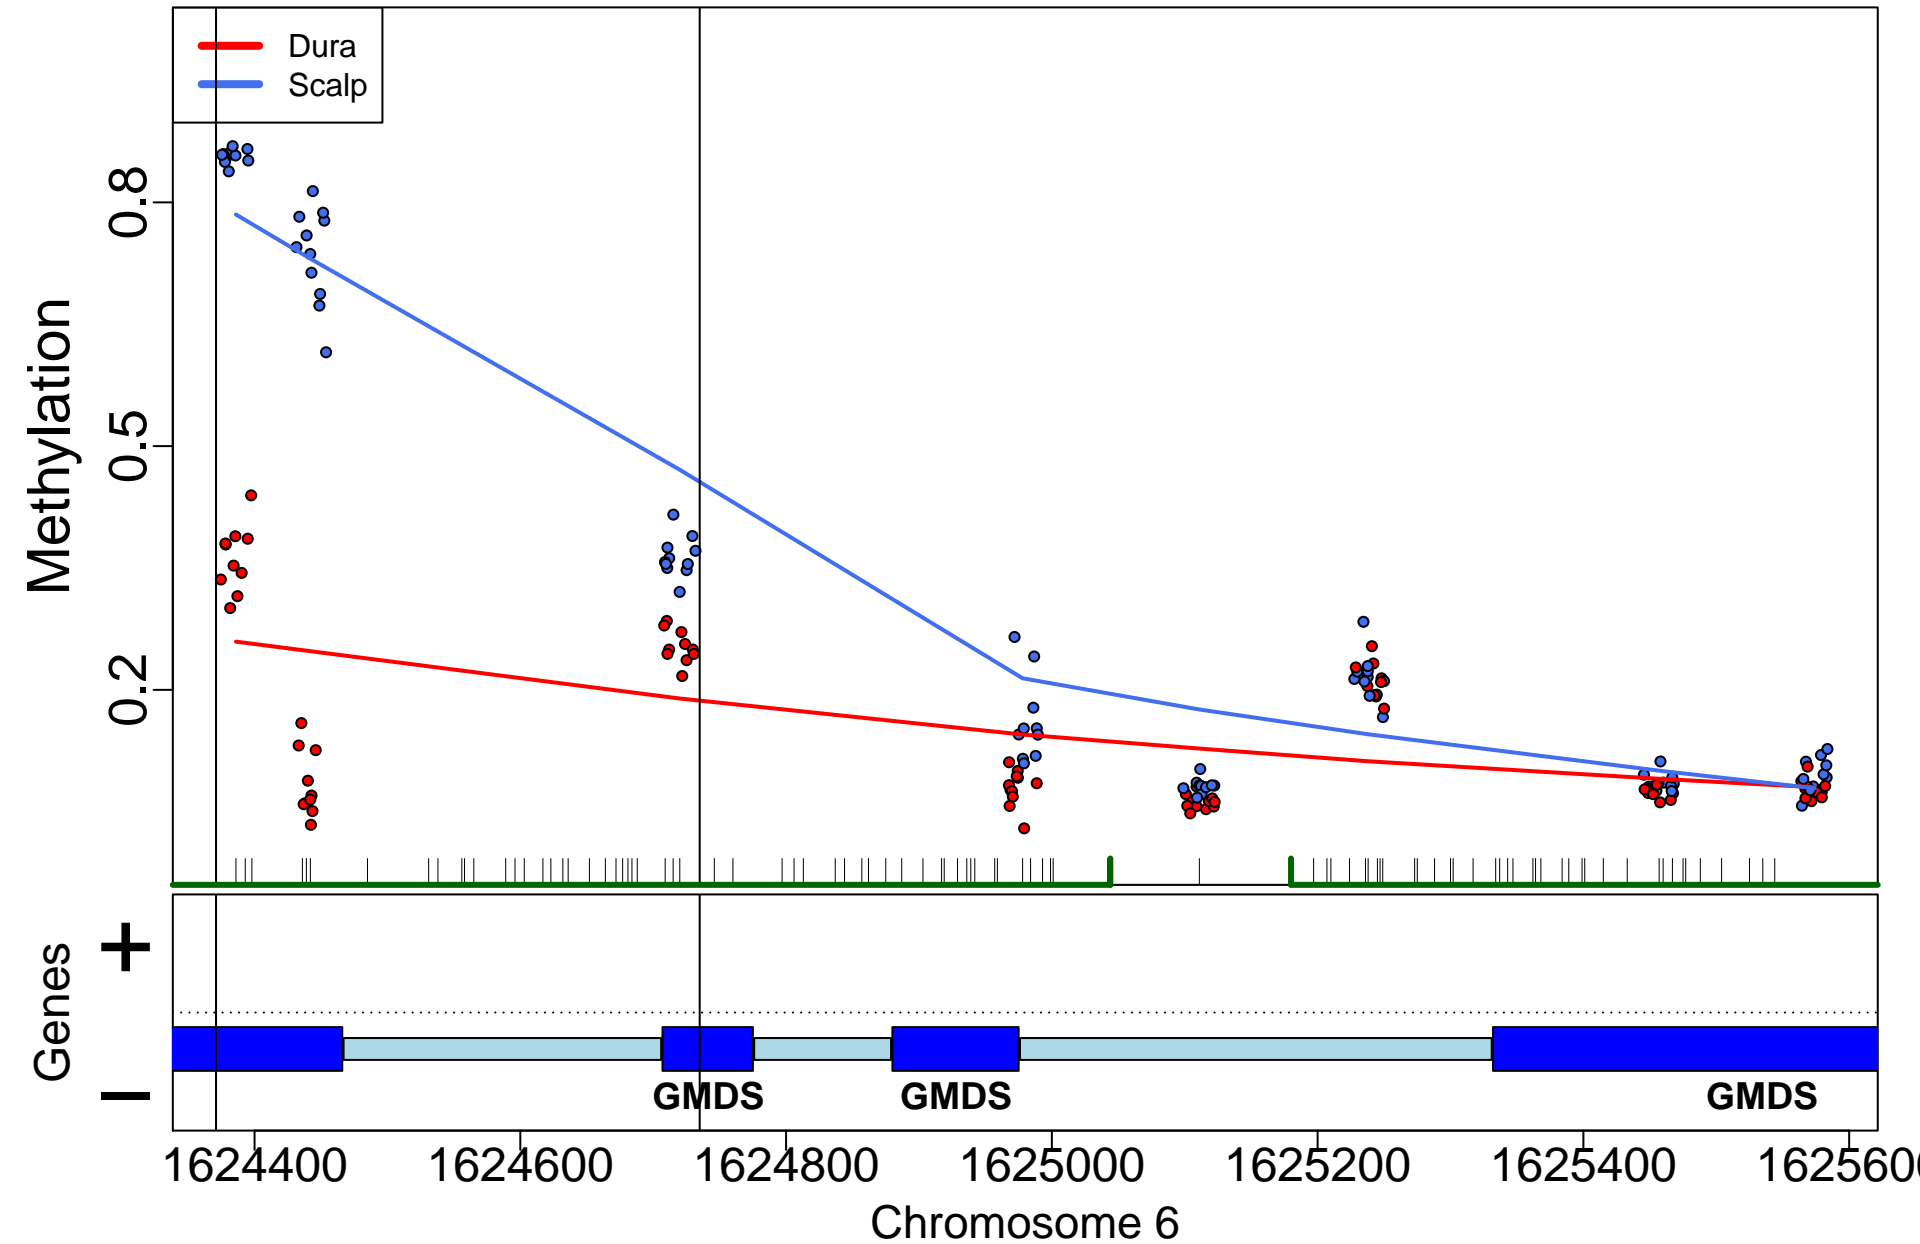

PYGO1; 549bp from tss:promoter

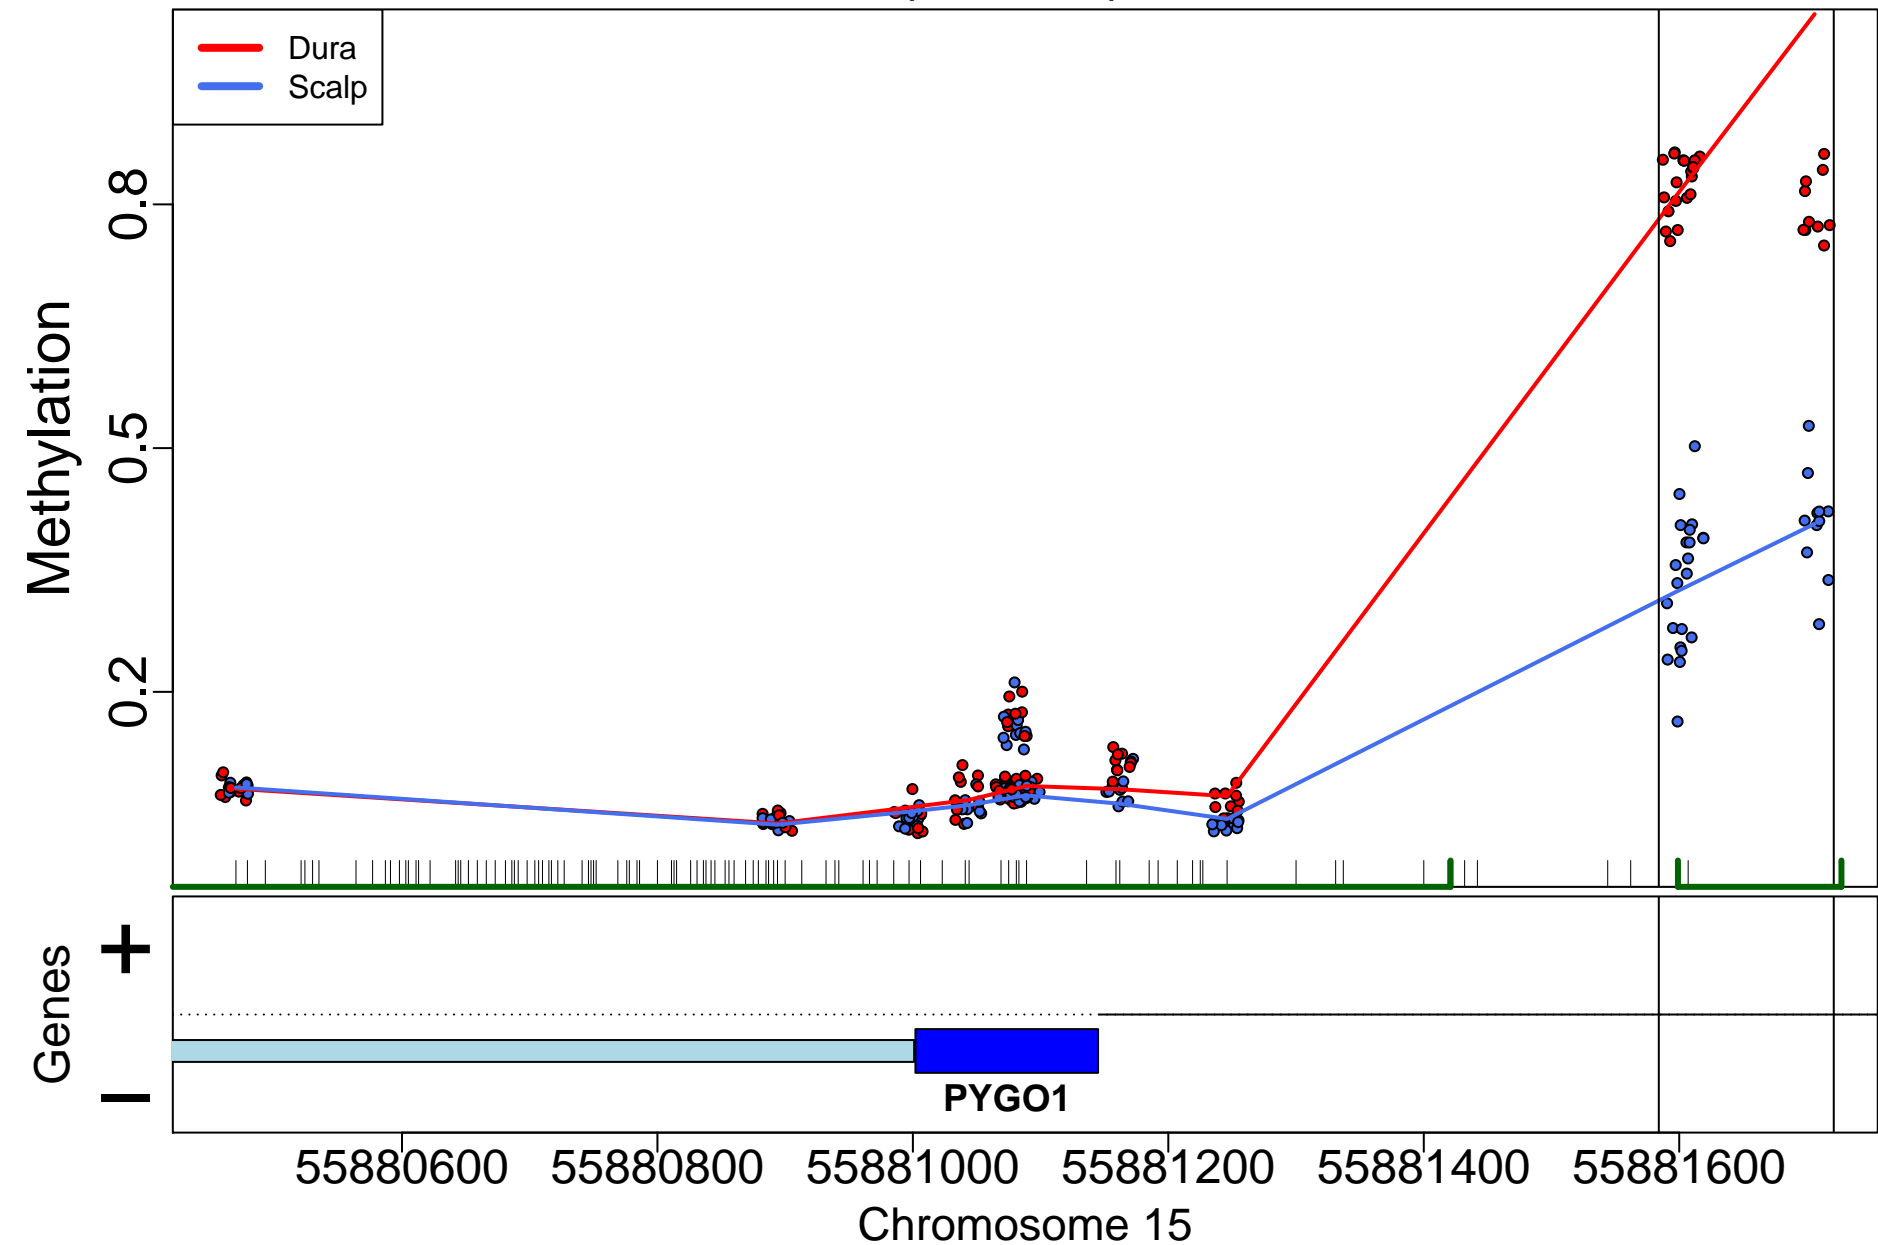

# MEIS1-AS3; 0bp from tss:NA

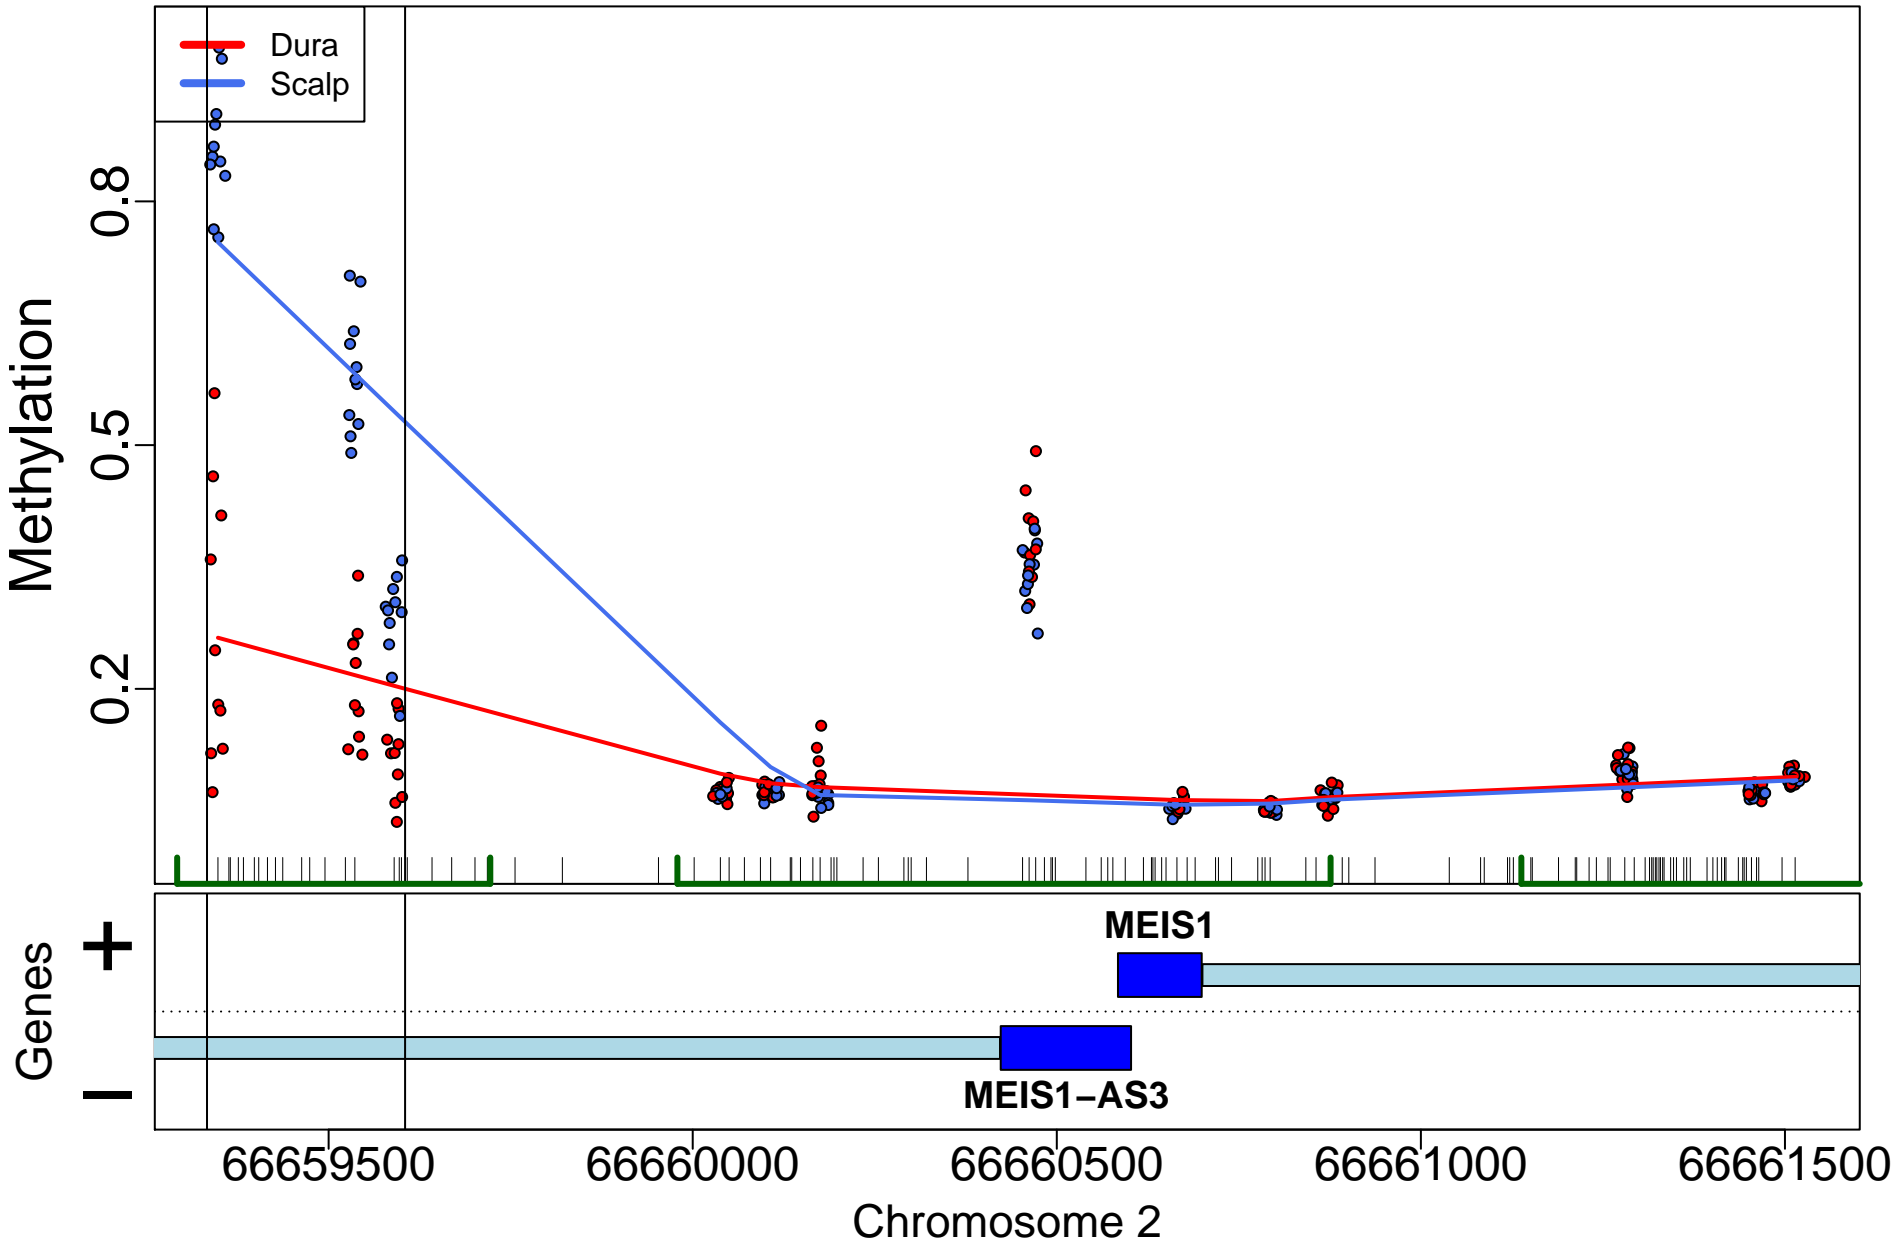

EPHA4; 2232bp from tss:inside intron

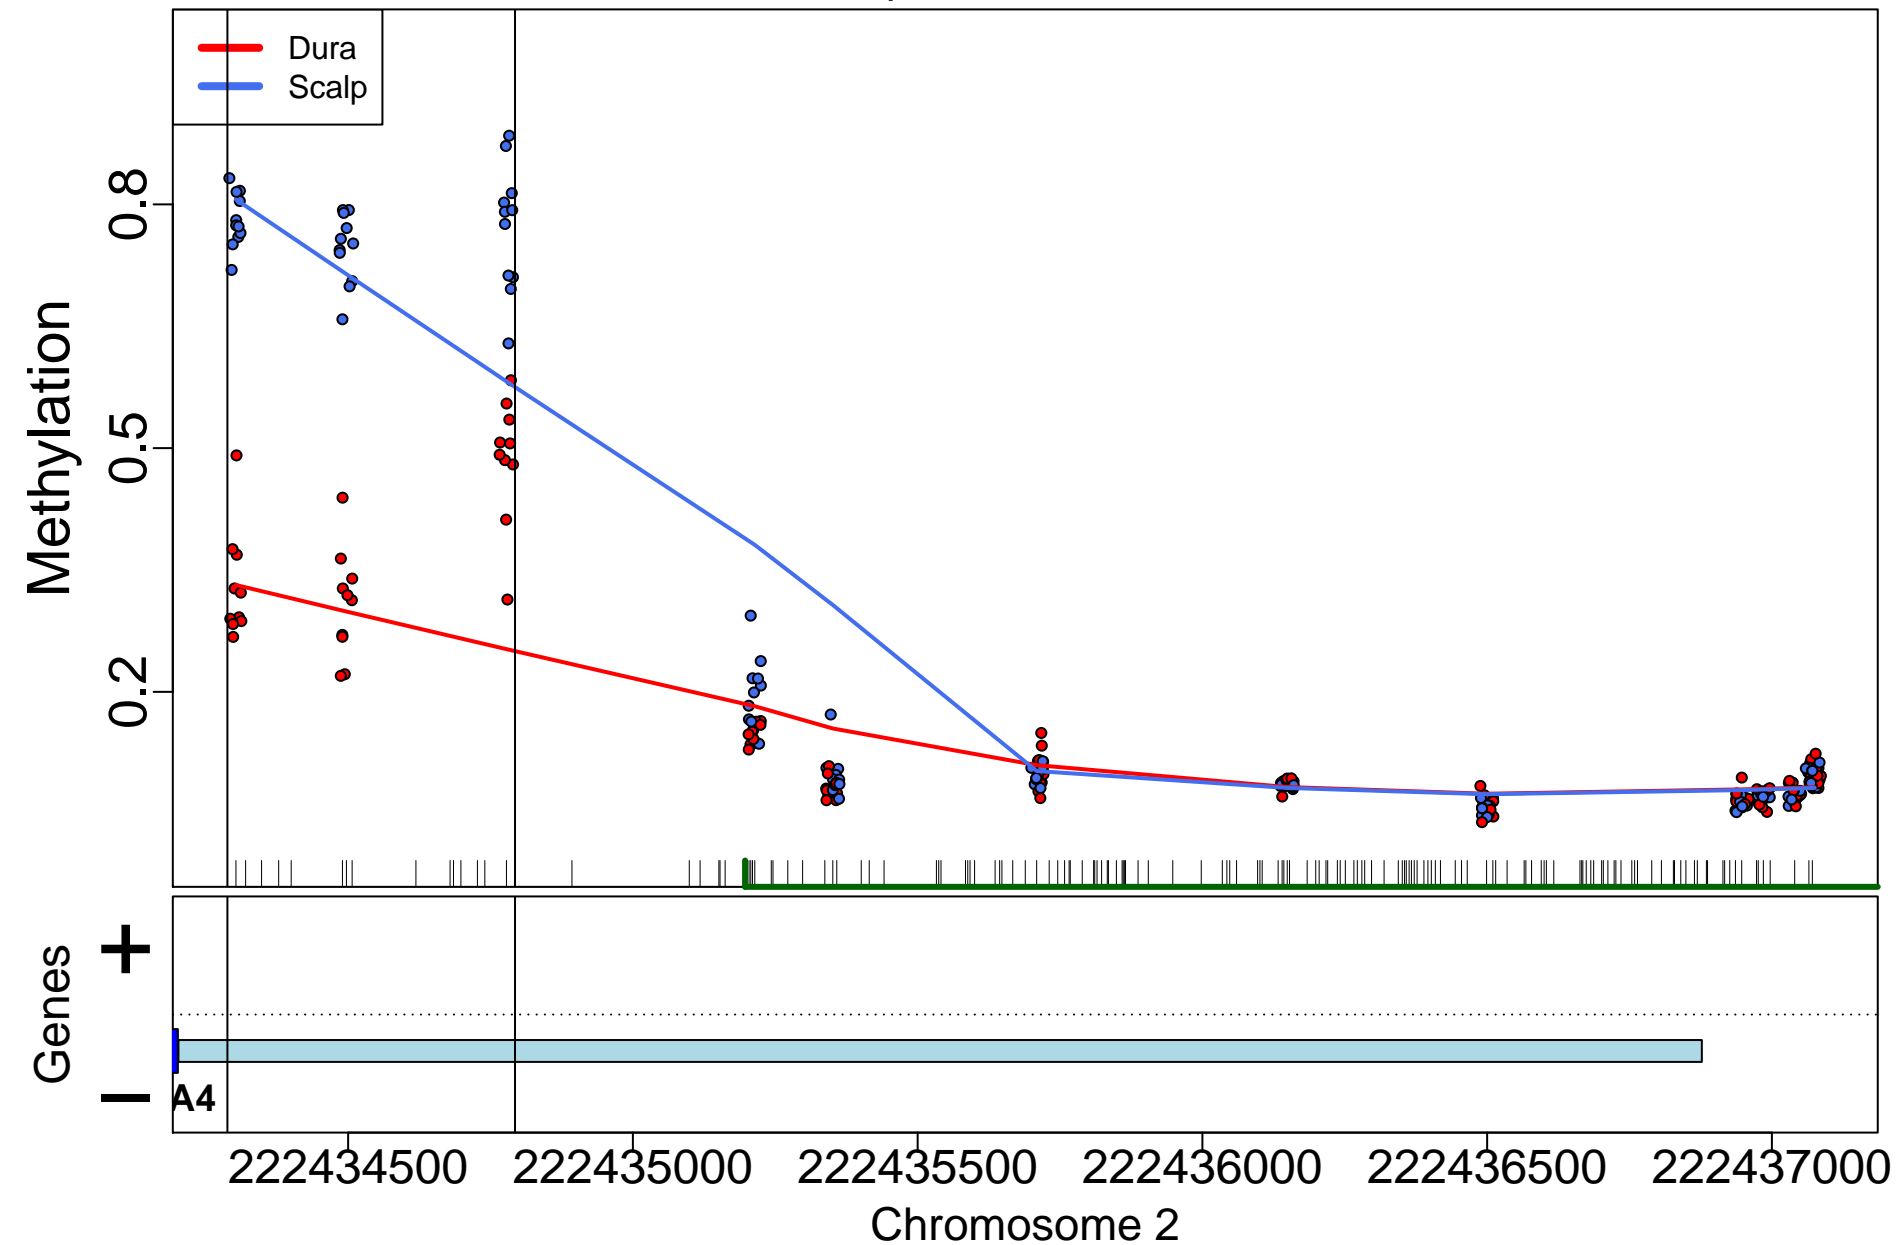

ADCY2; 45200bp from tss:inside exon

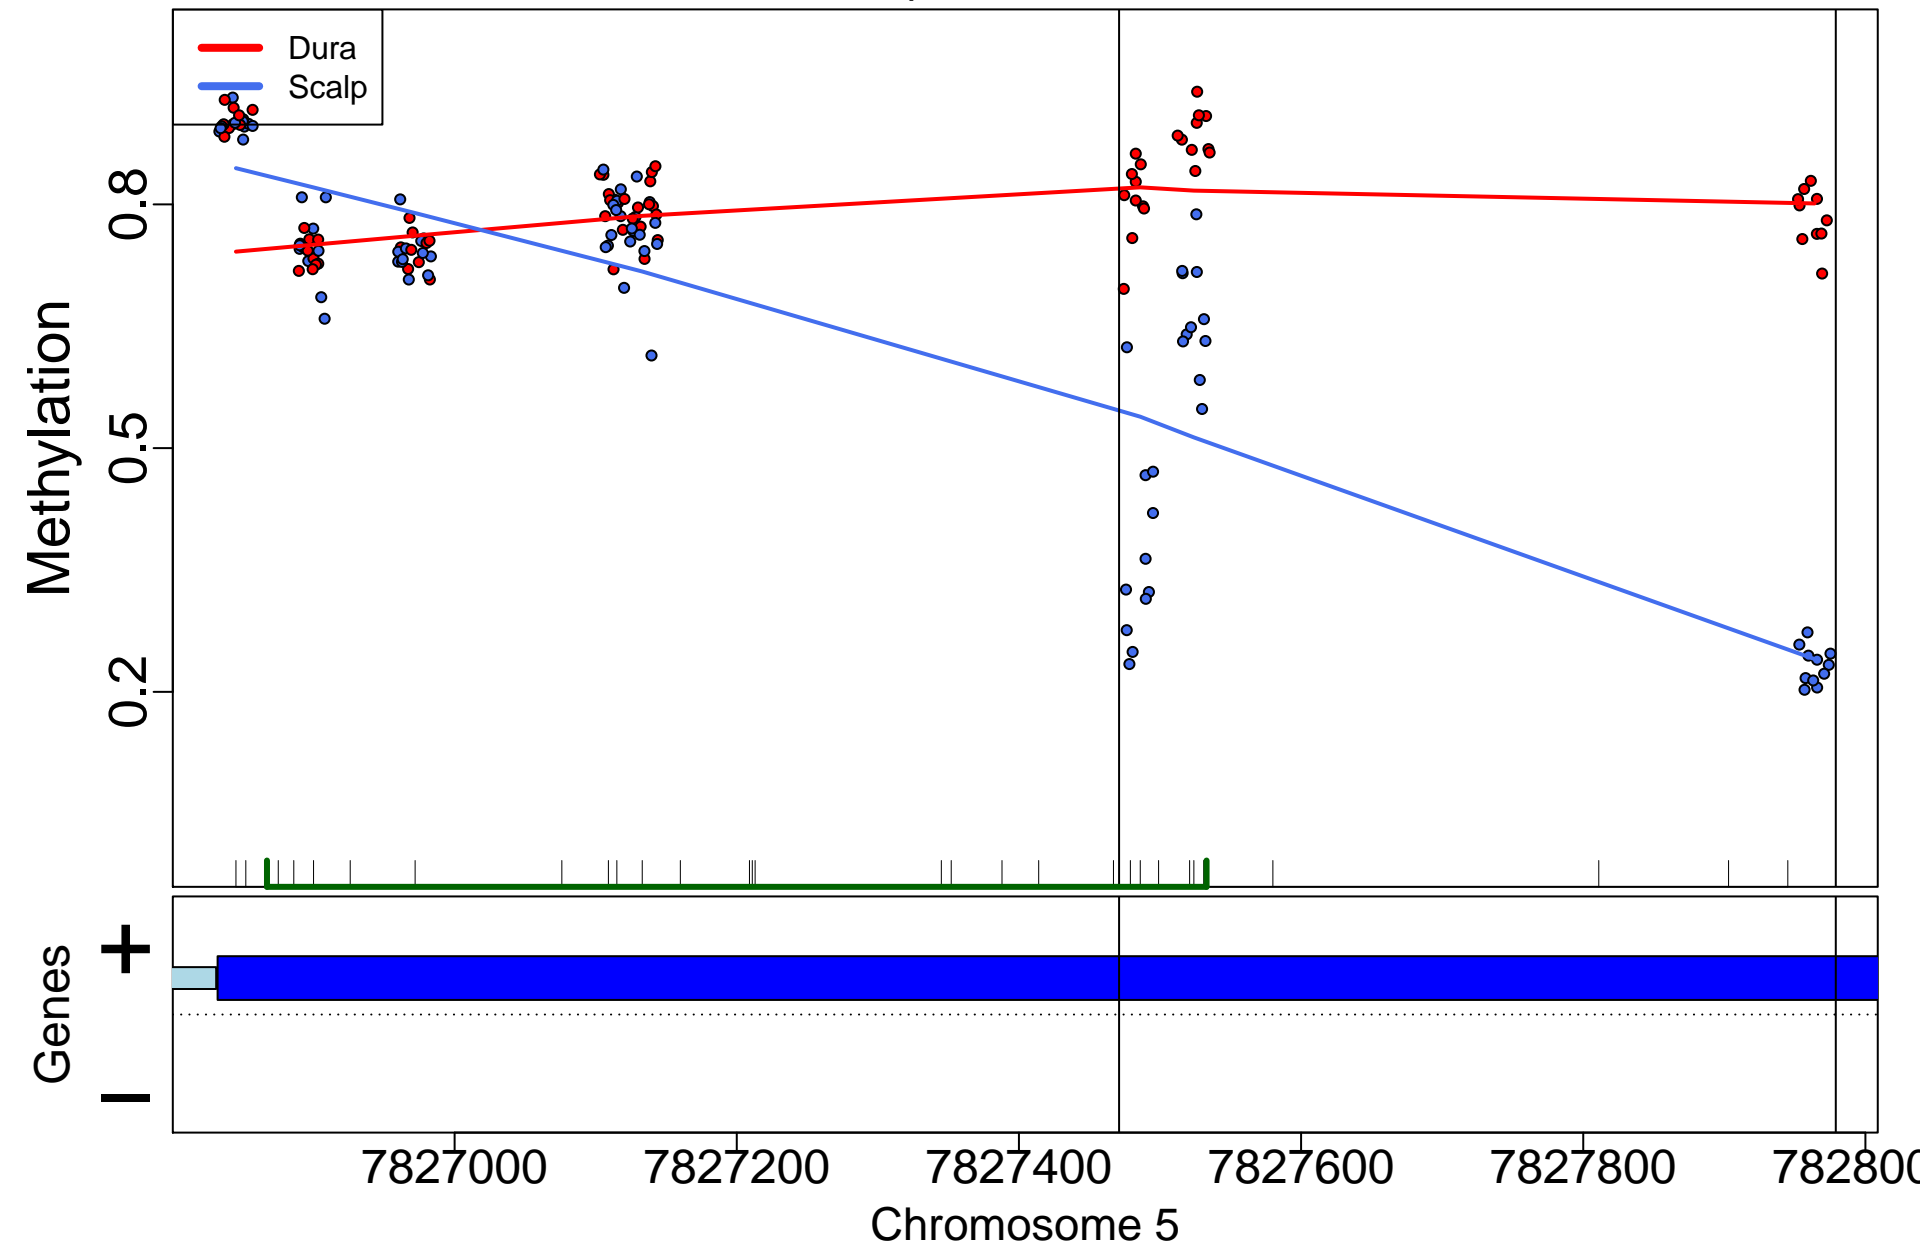

BIN1; 110518bp from tss:downstream

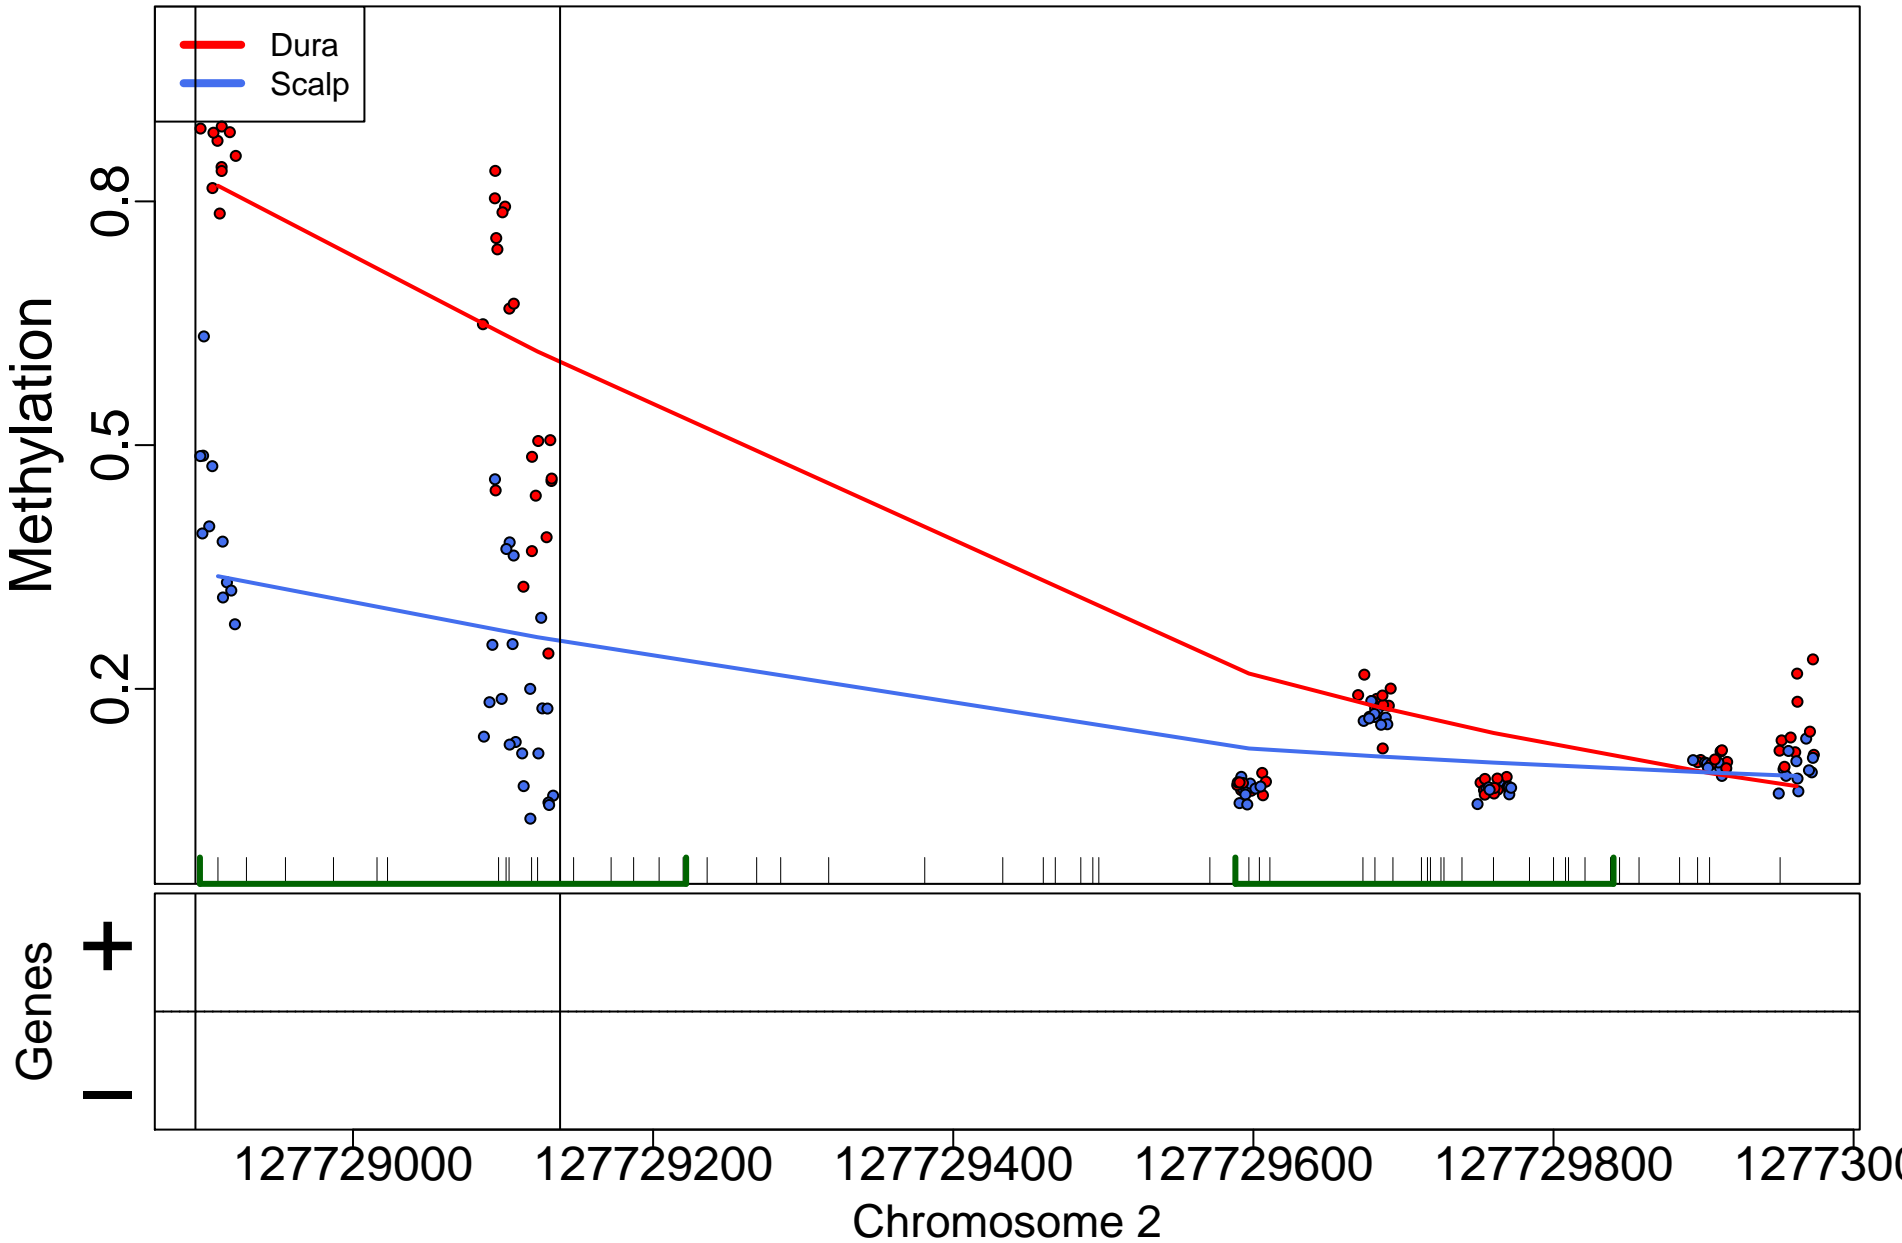

# TJP1; 124710bp from tss:downstream

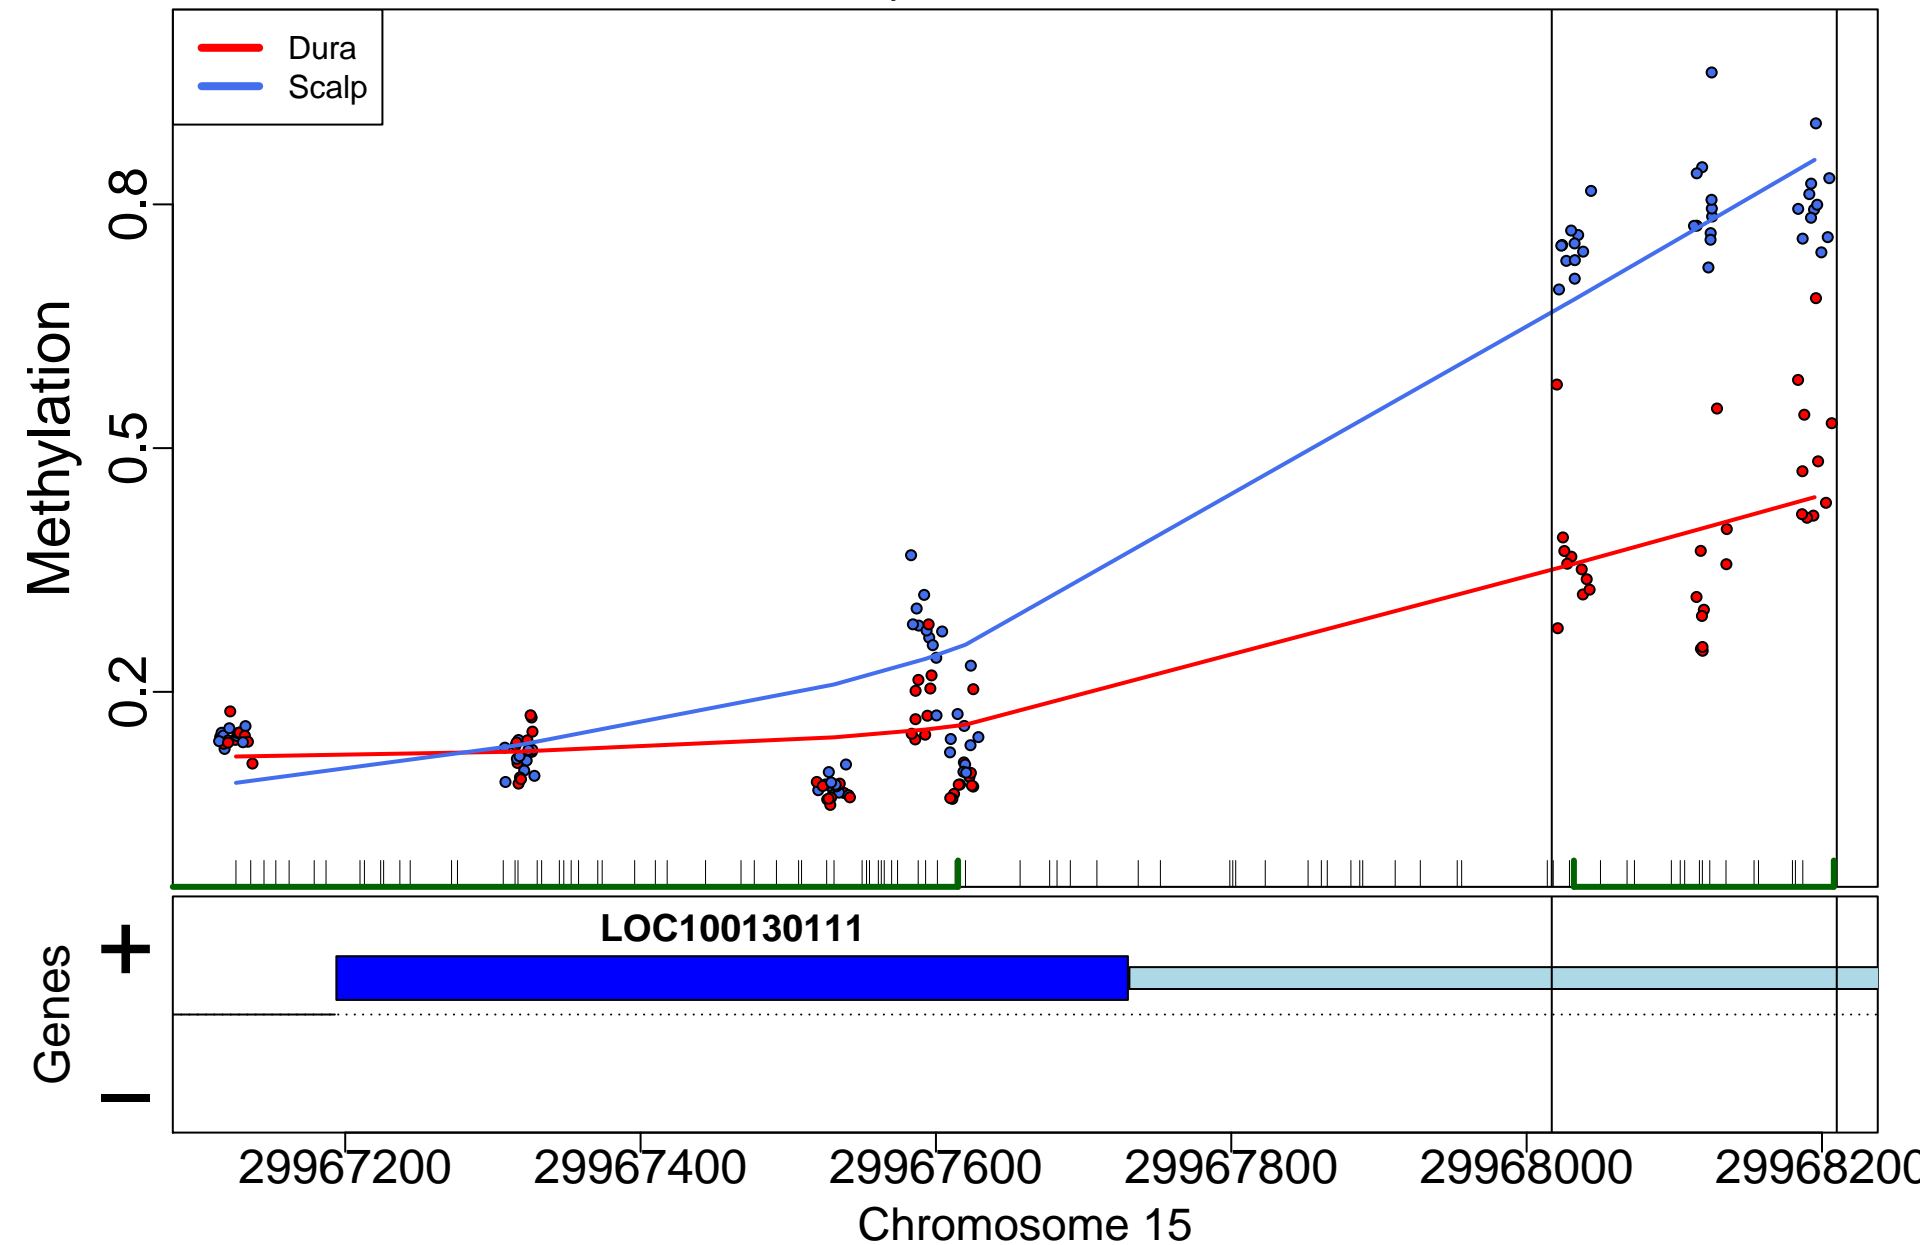

SEL1L2; 0bp from tss:NA

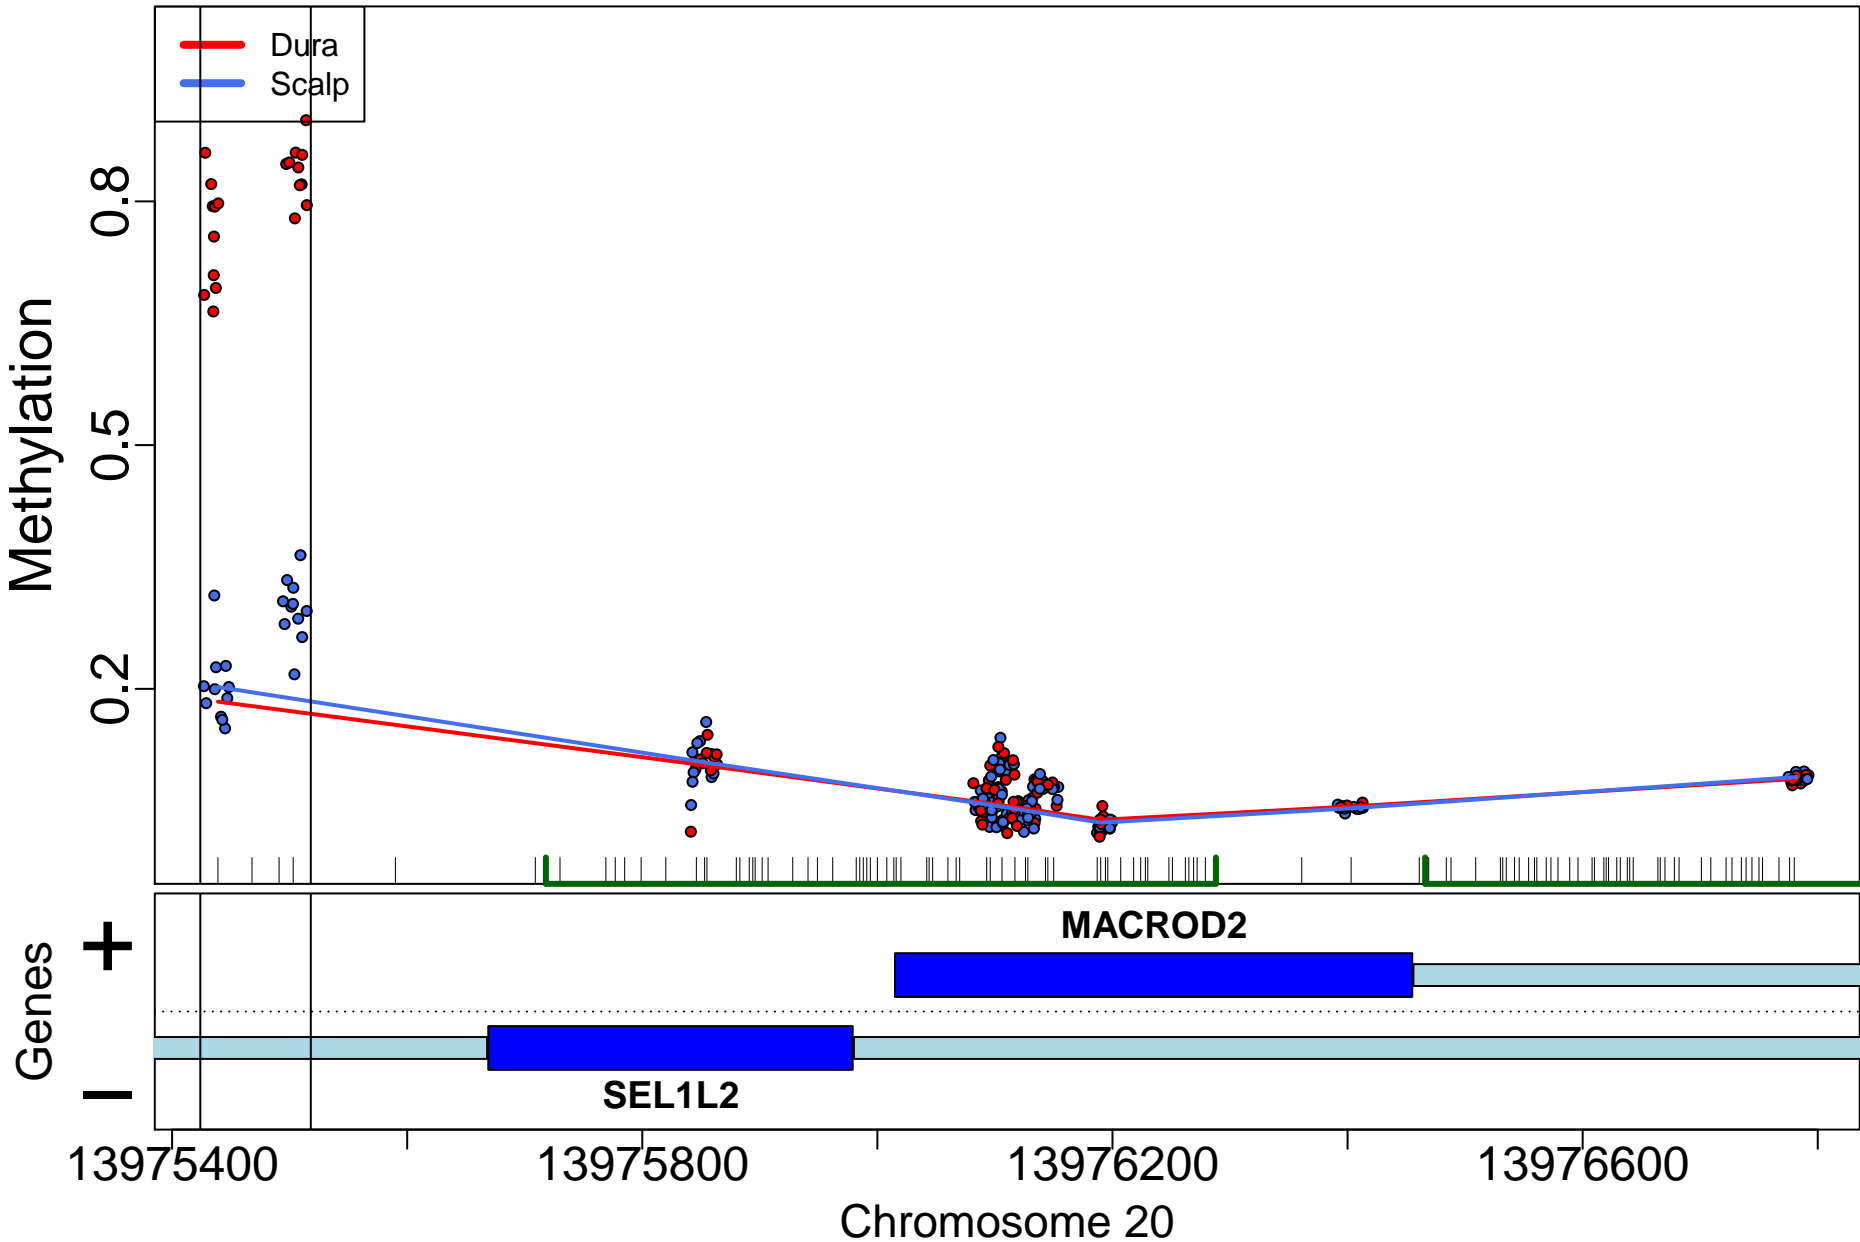



IFITM1; 1111bp from tss:inside exon

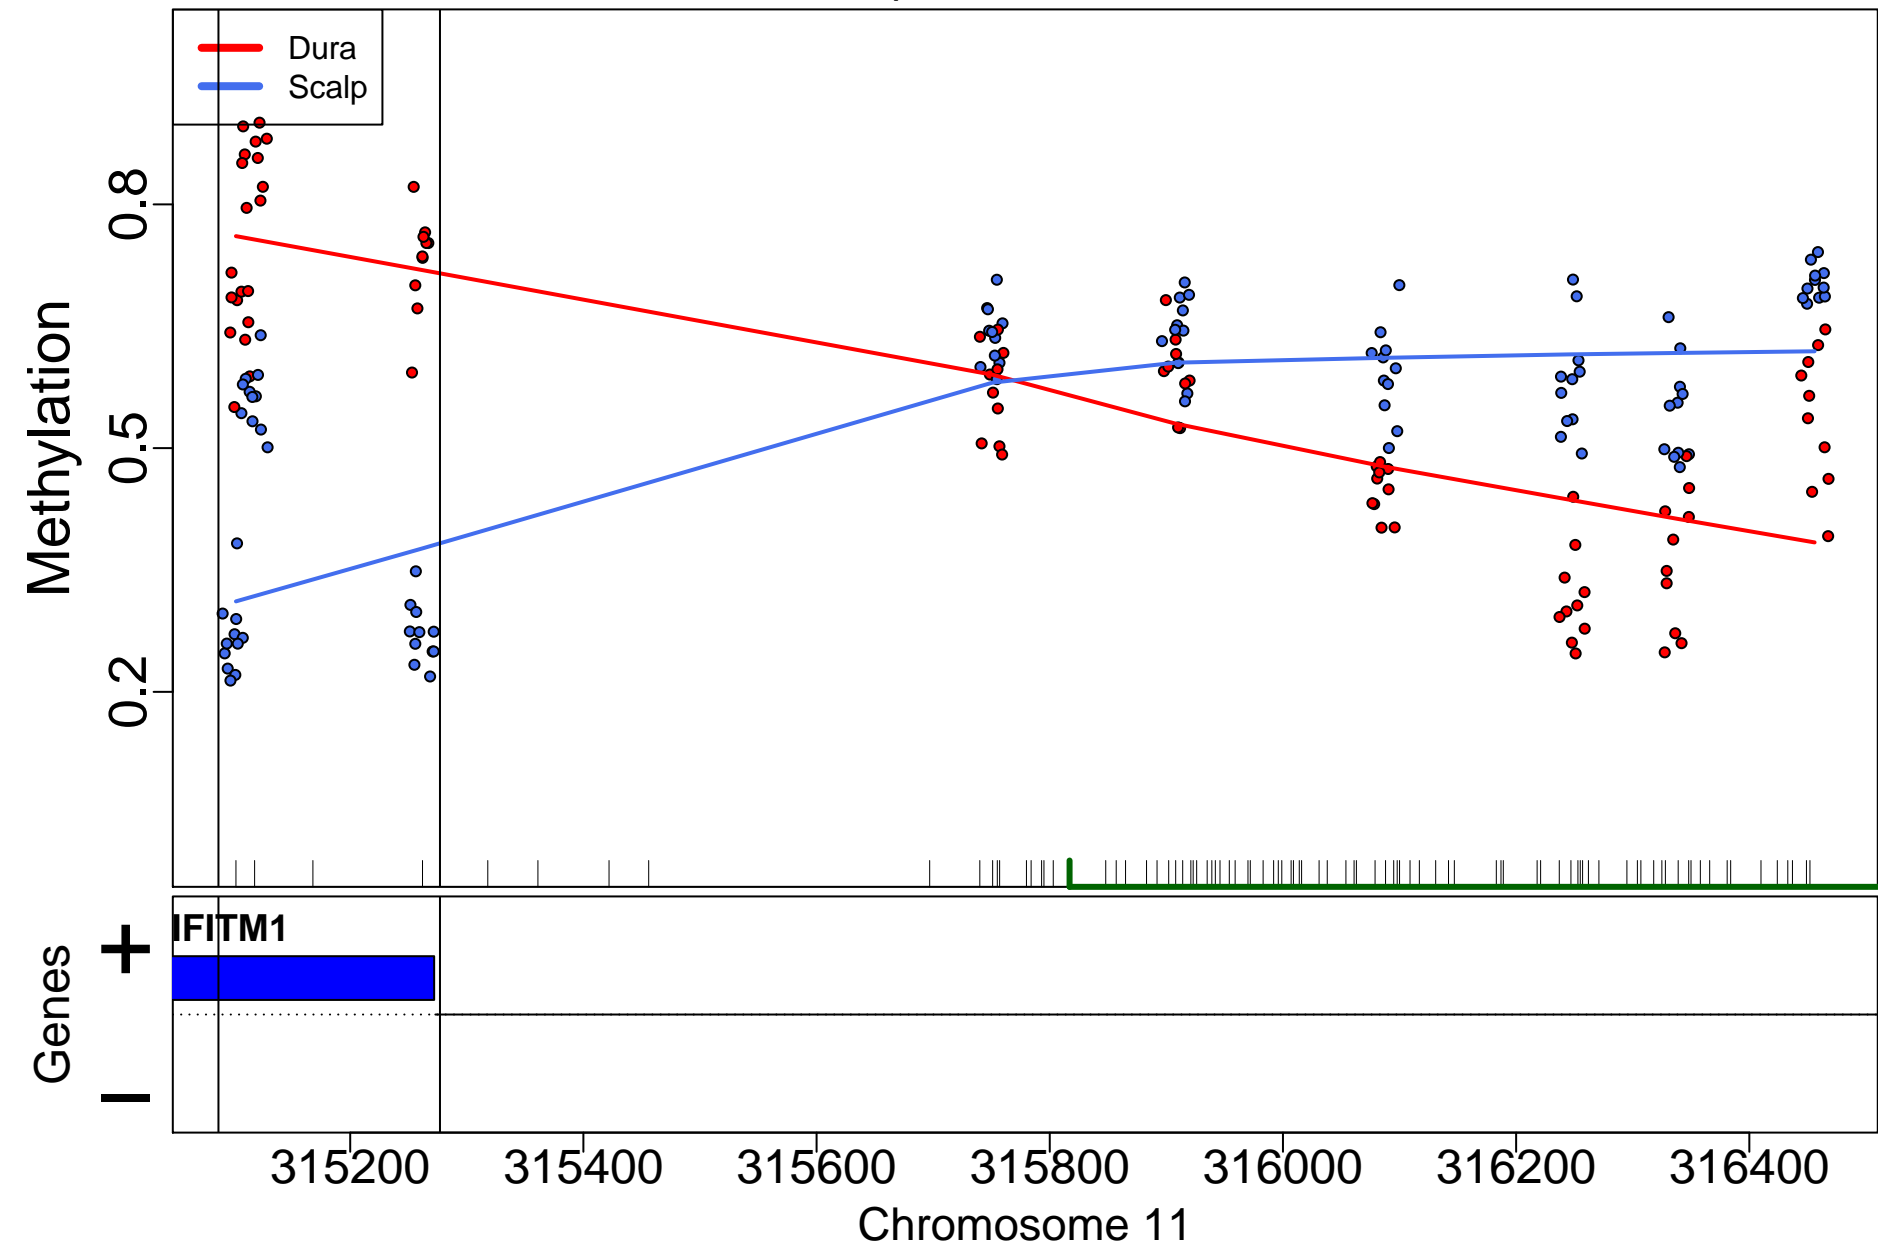

C2CD2; 863bp from tss:inside intron

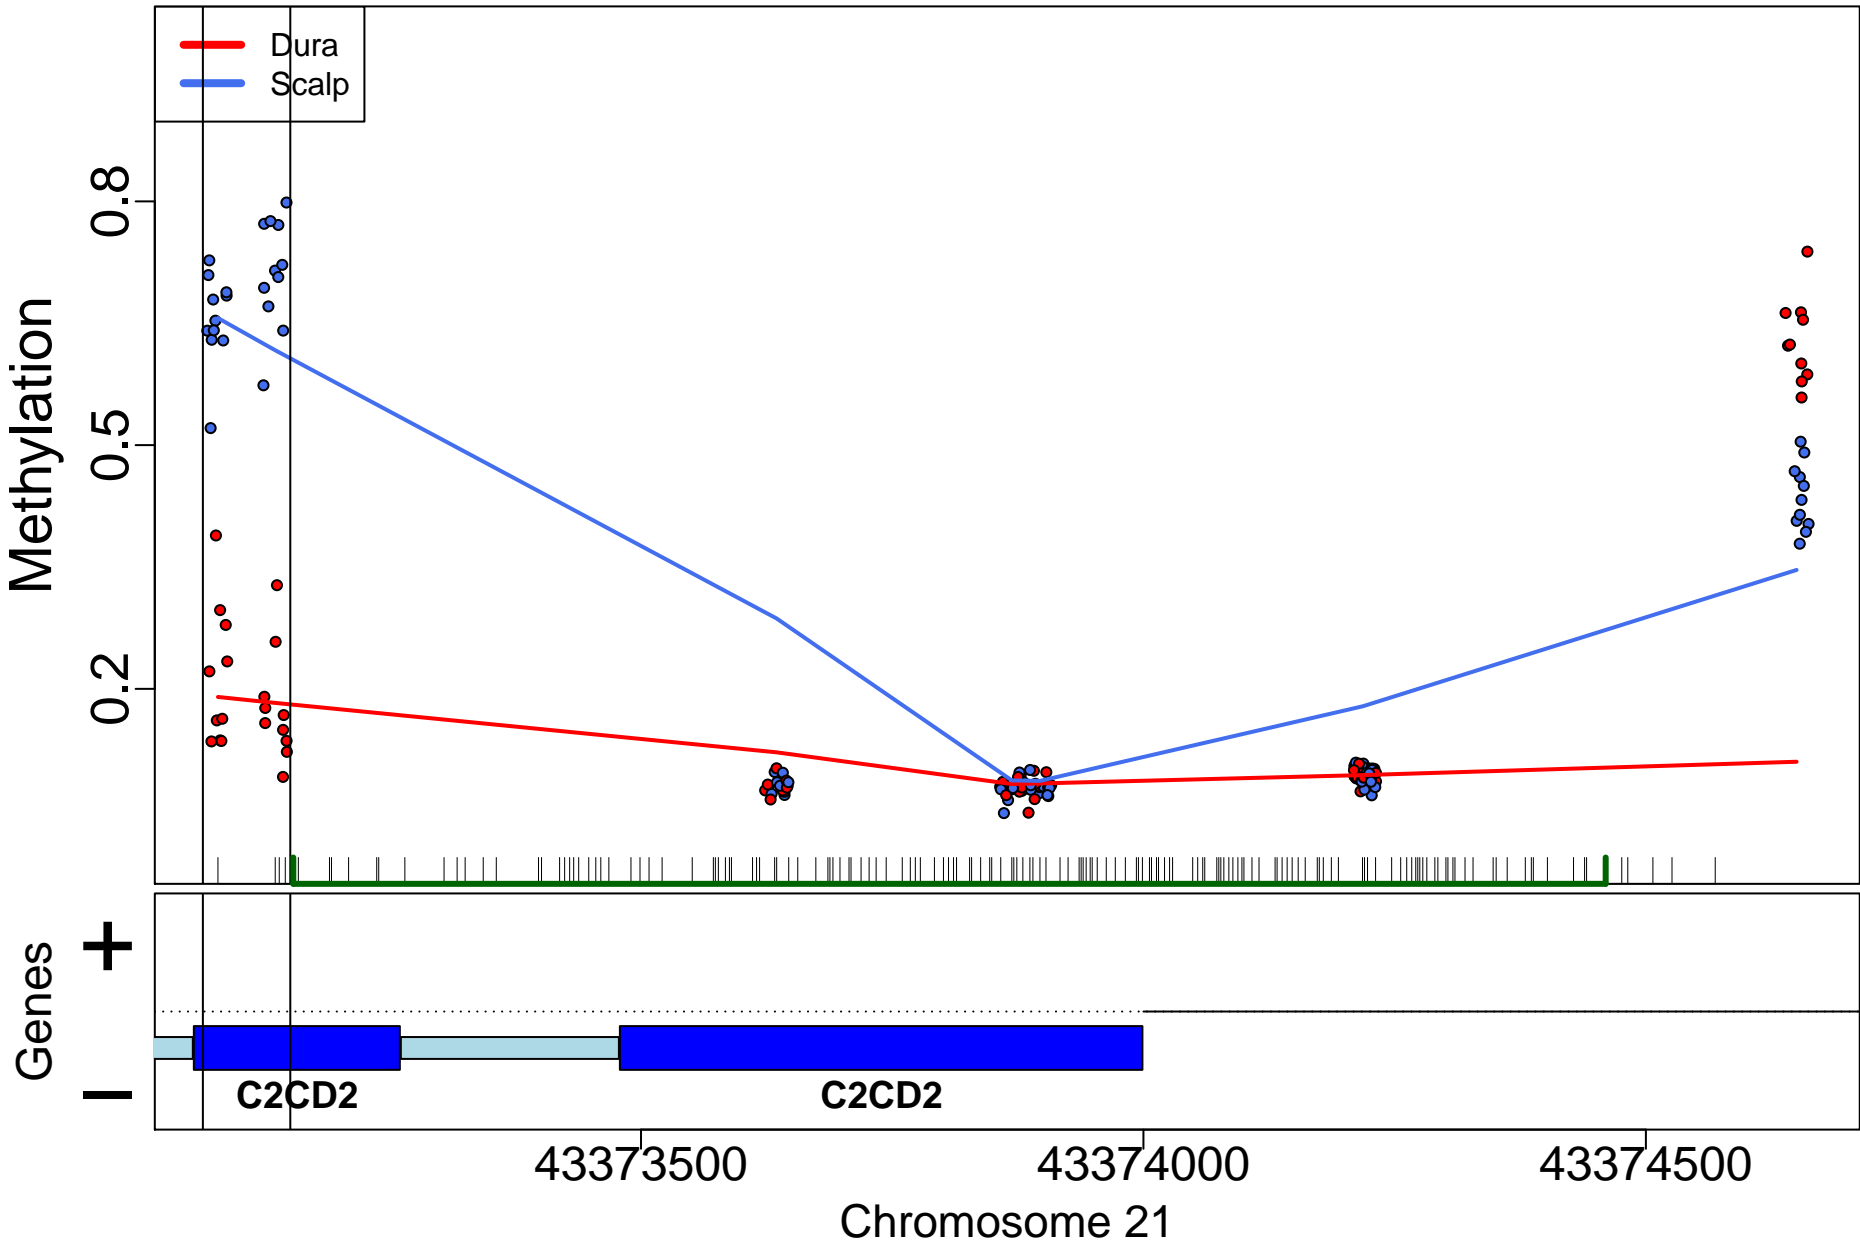

# RNF150; 703bp from tss:promoter

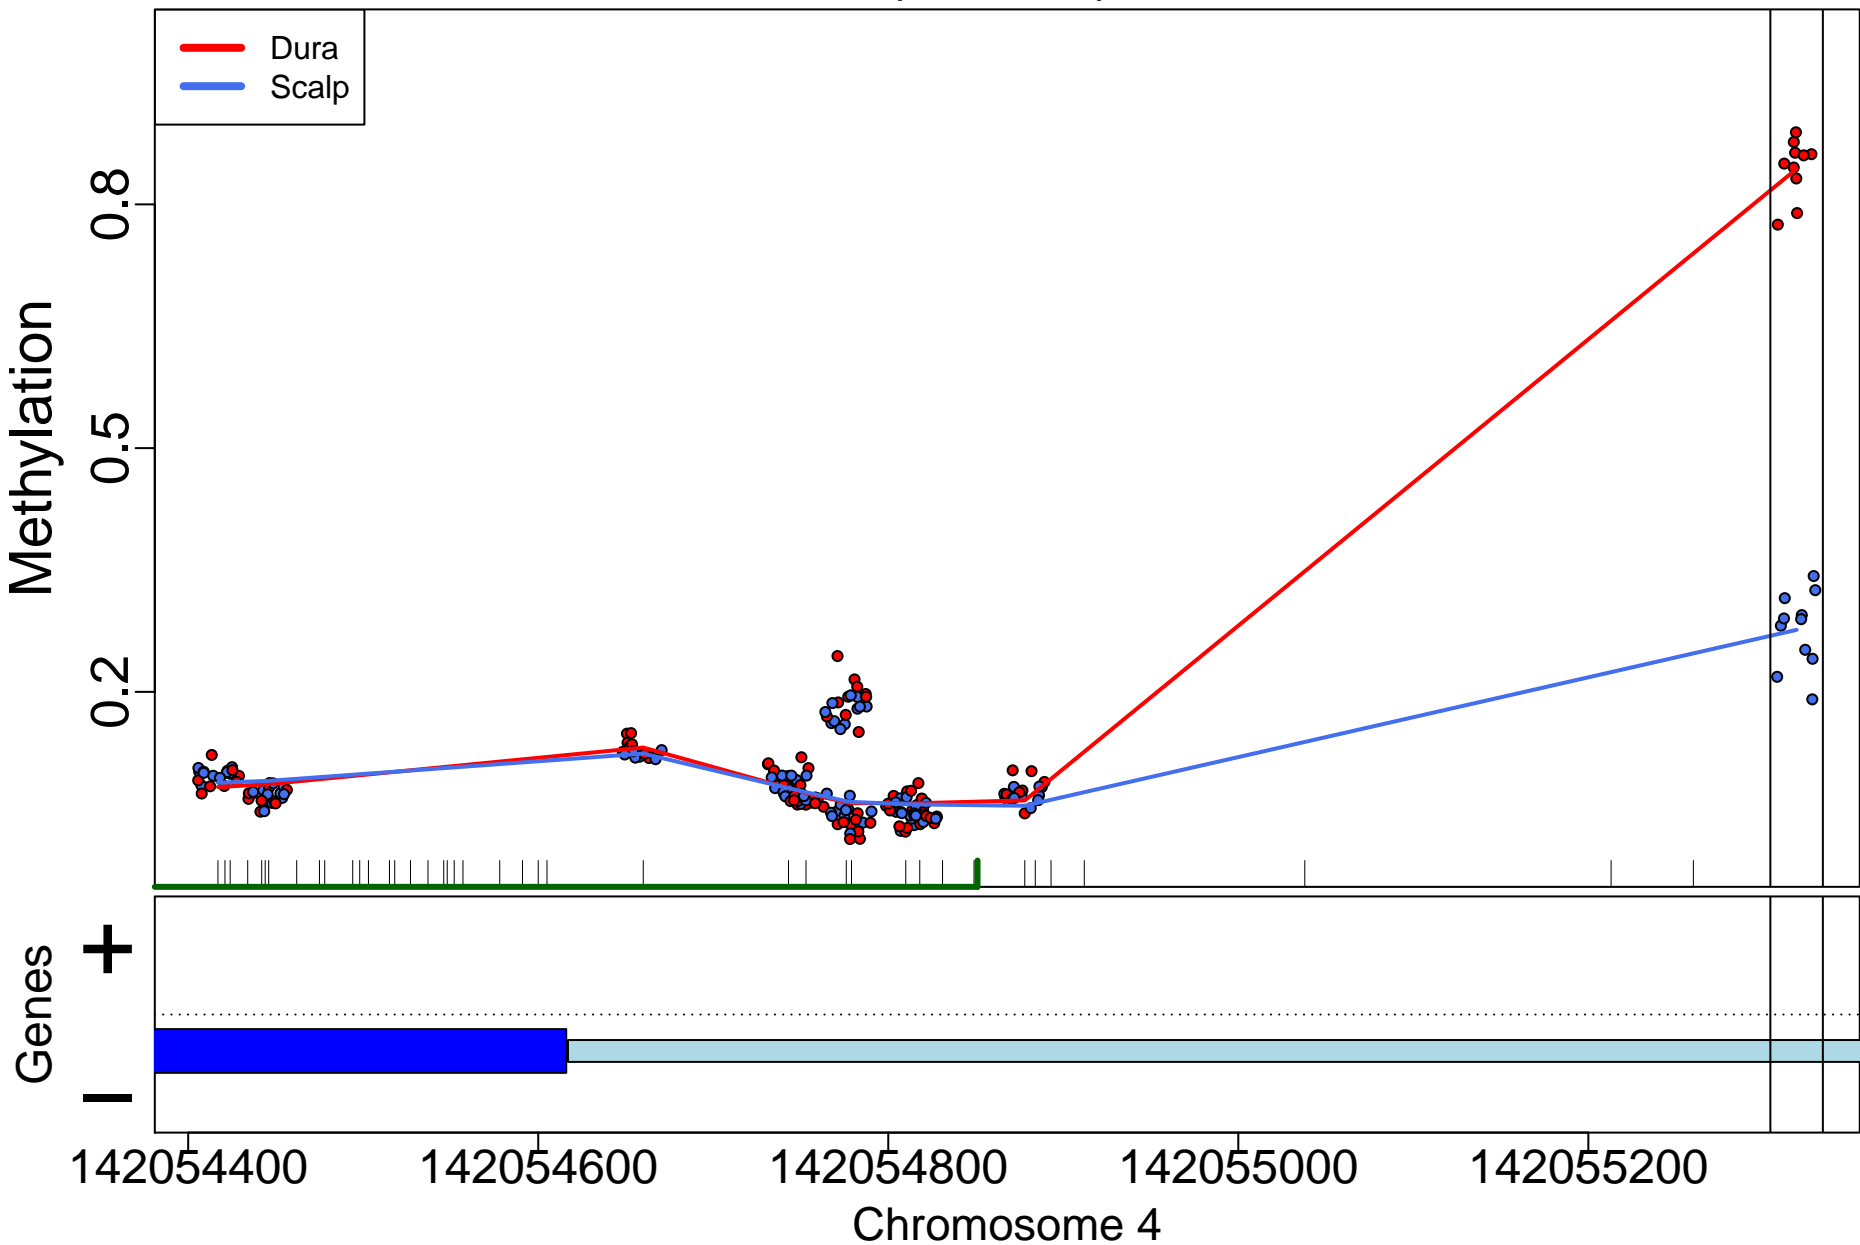

SIX1; 8767bp from tss:upstream

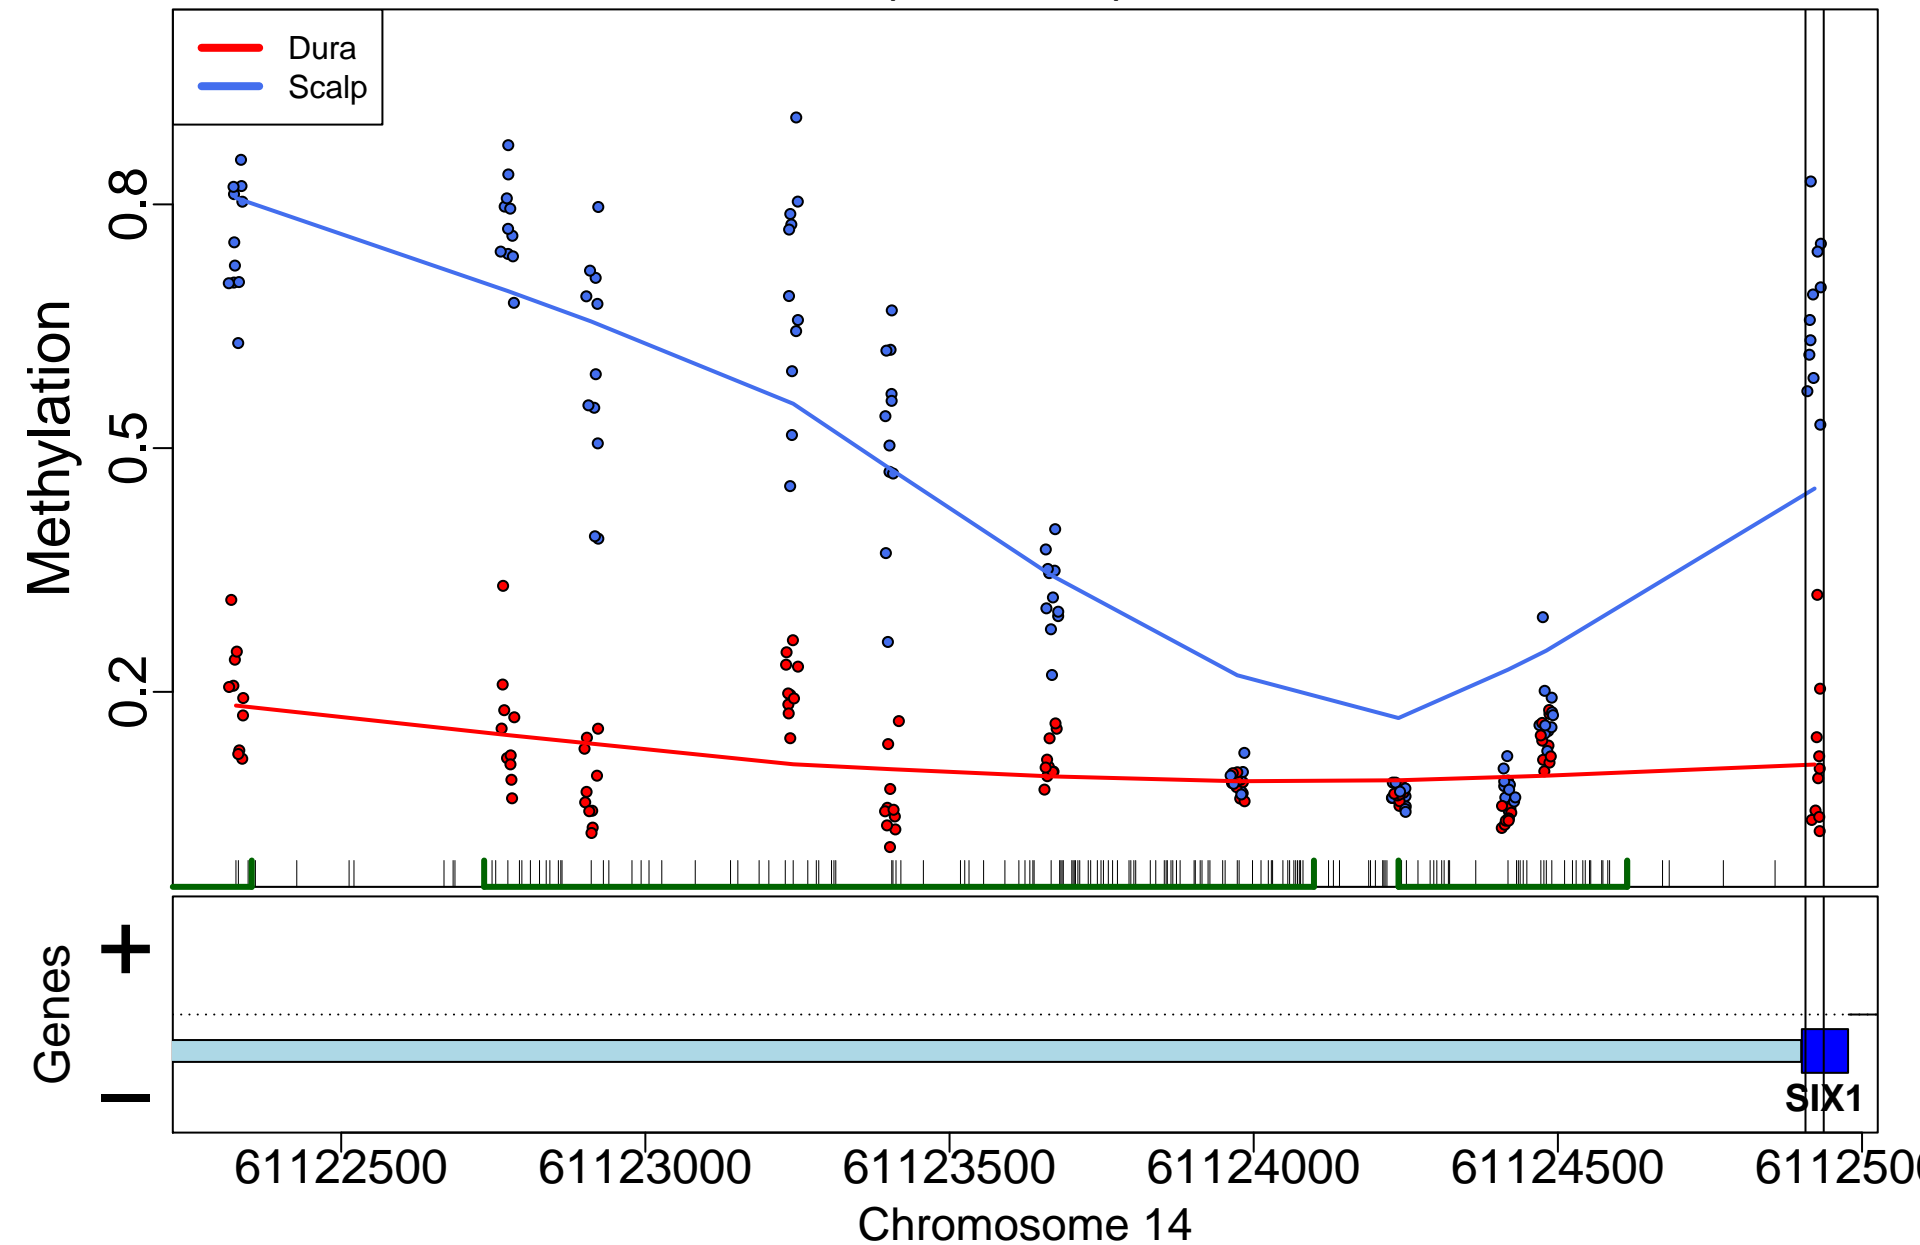

# LTV1; 854bp from tss:promoter

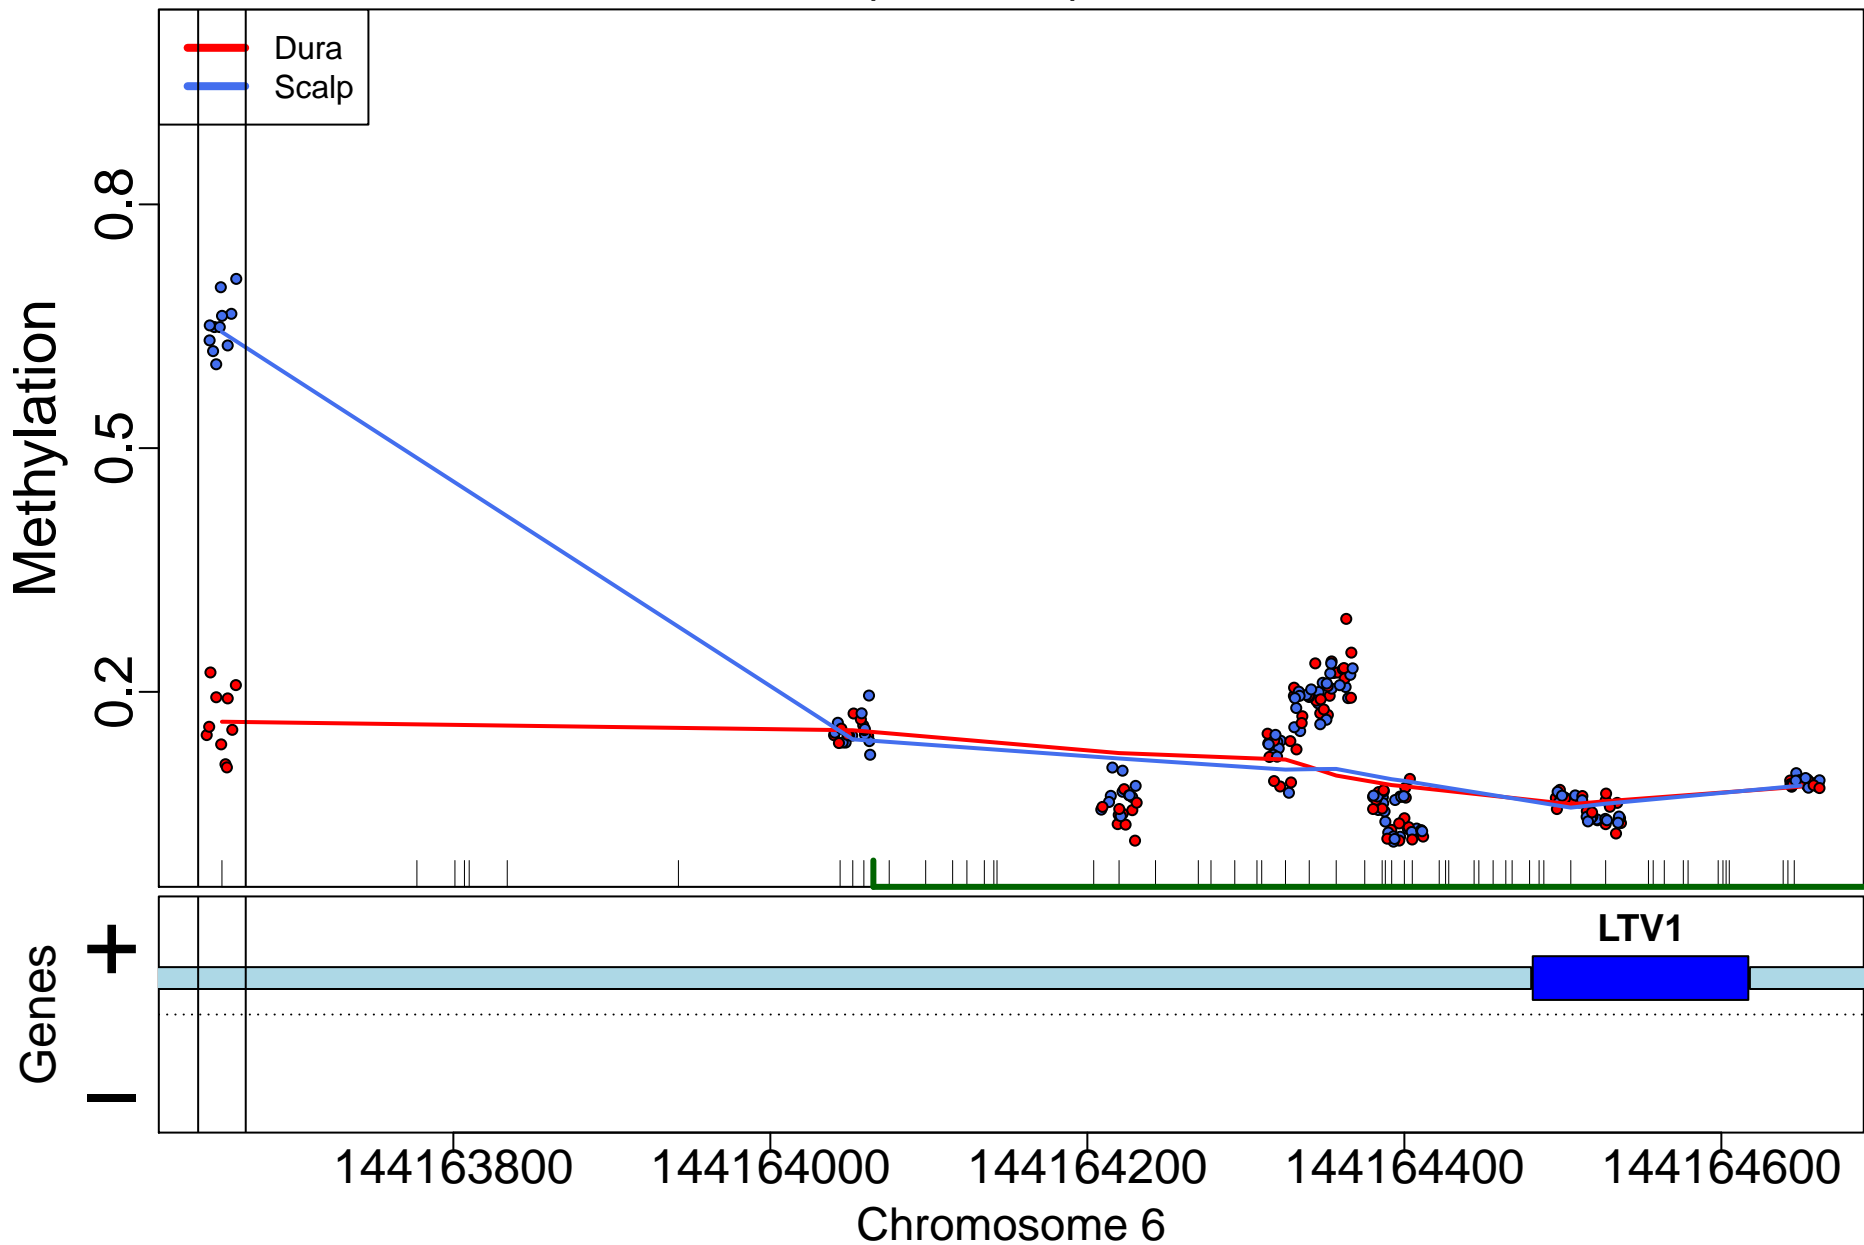

# GABRB1; 617bp from tss:promoter

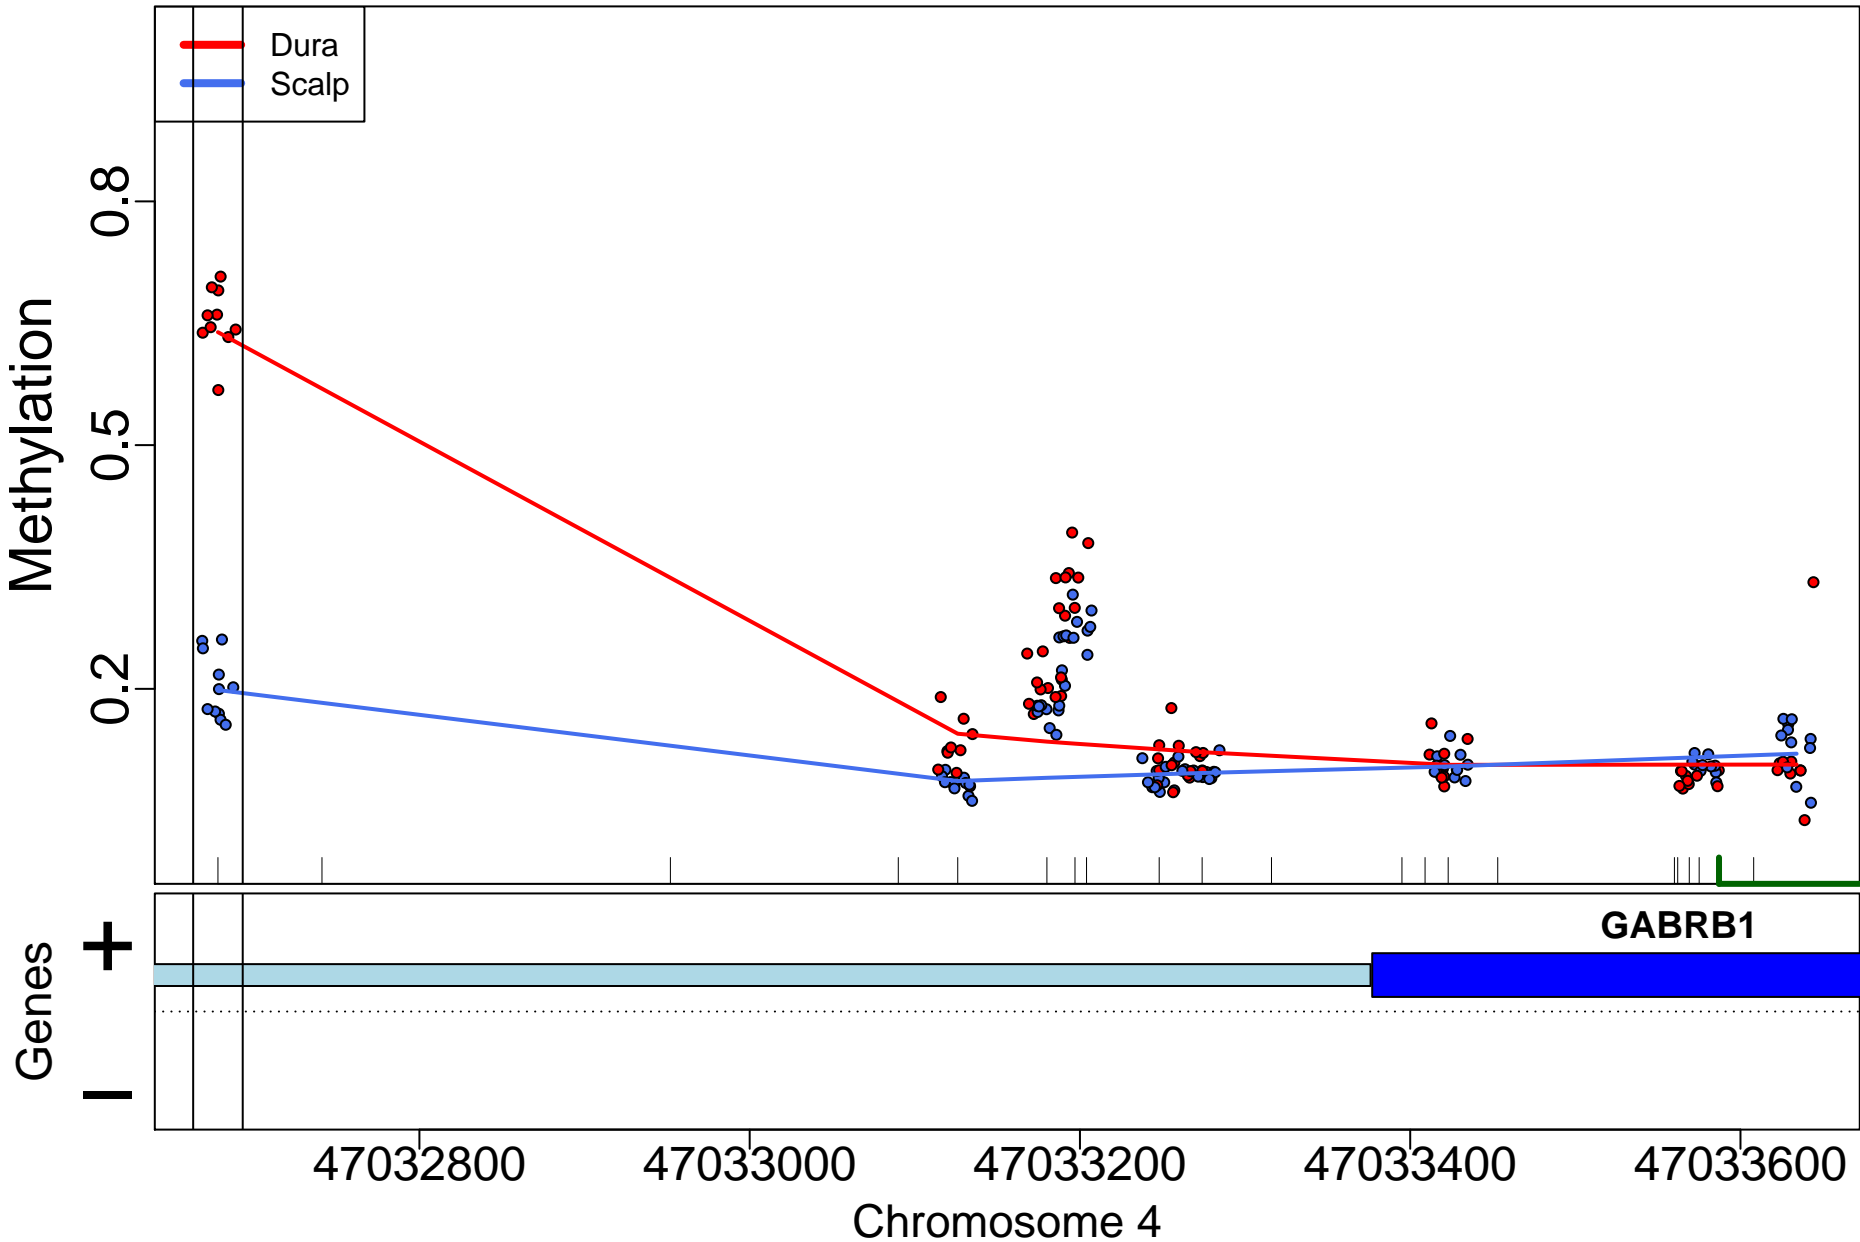

FBXO4; 564bp from tss:promoter

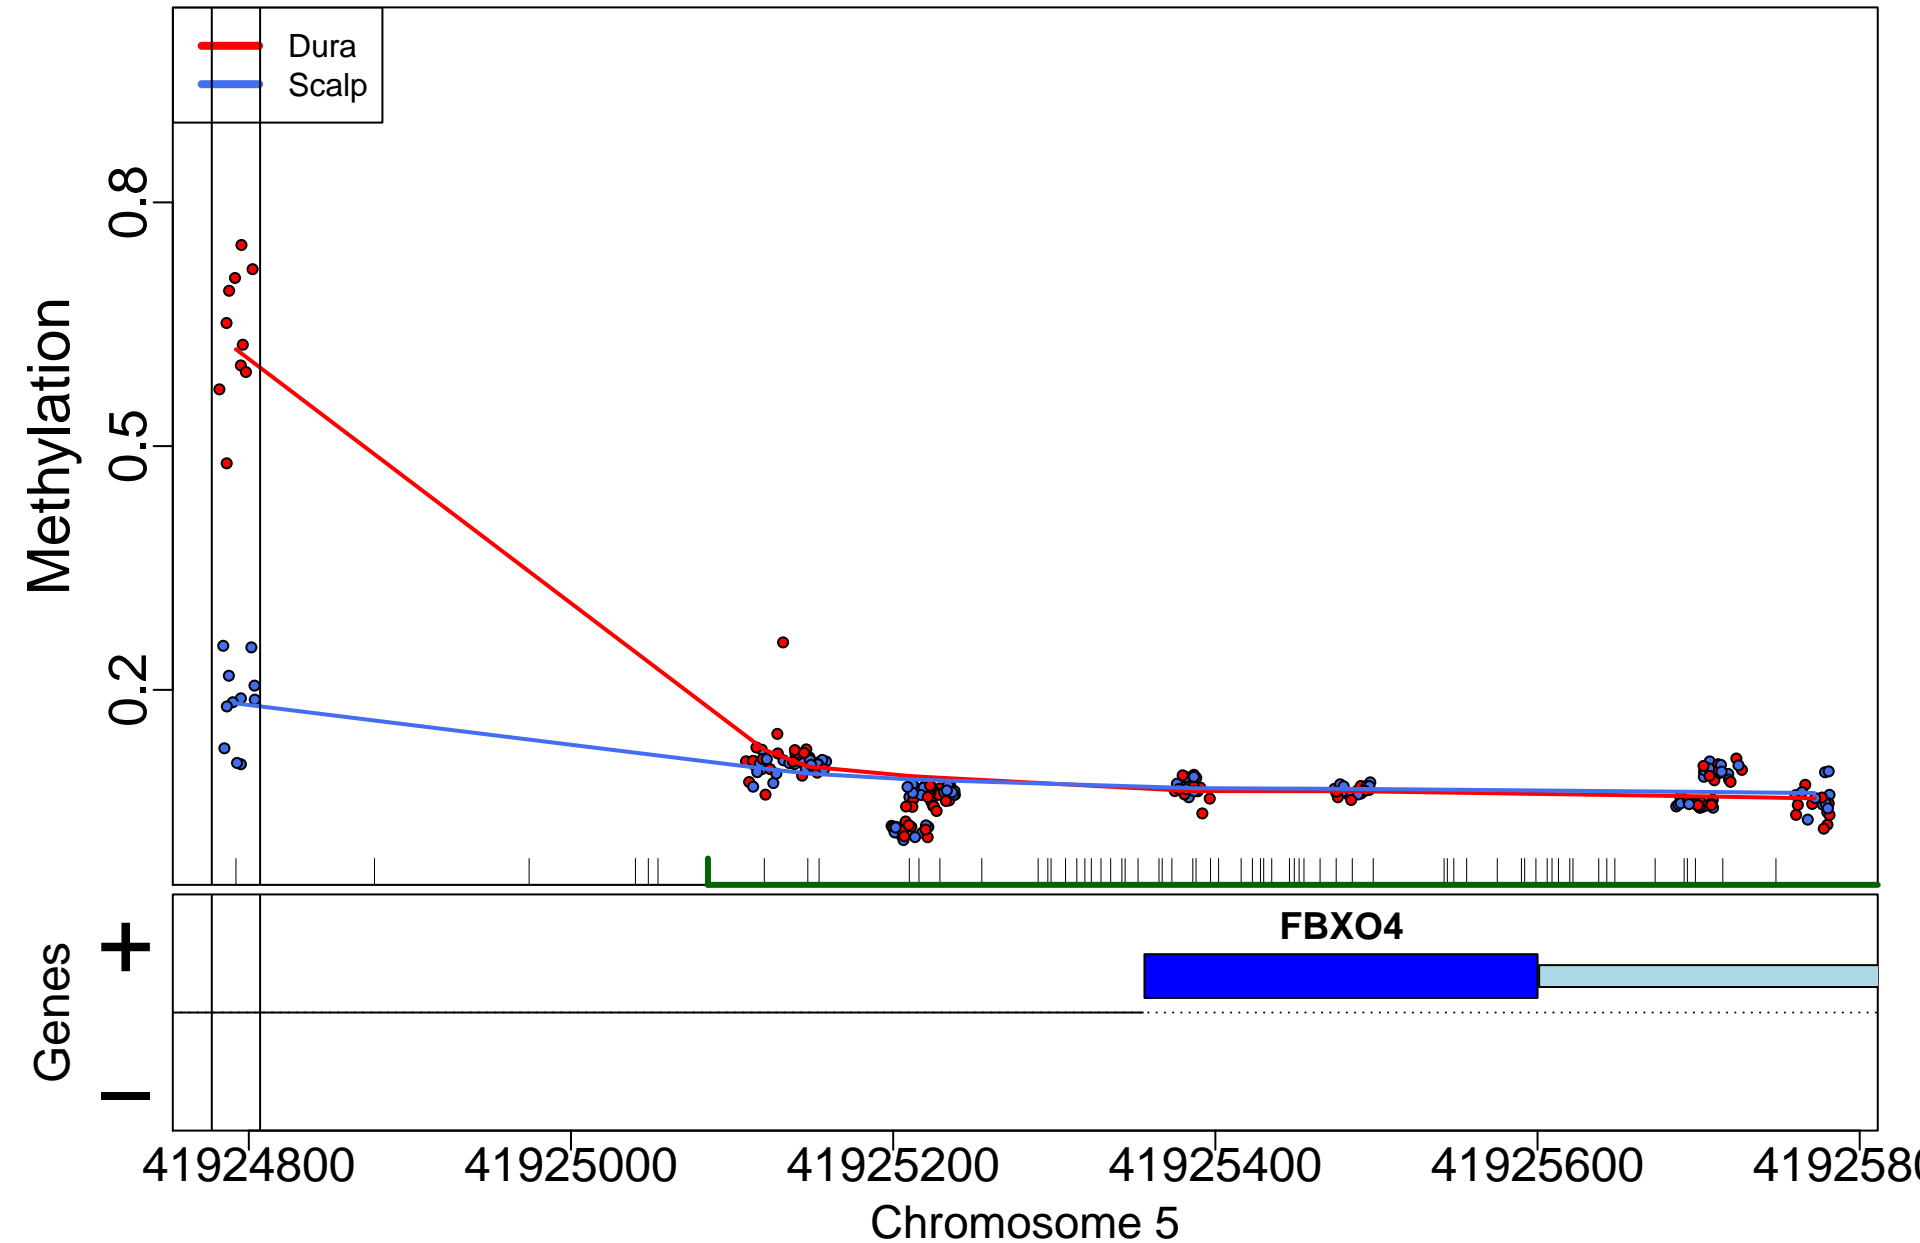

EVX1; 200bp from tss:promoter

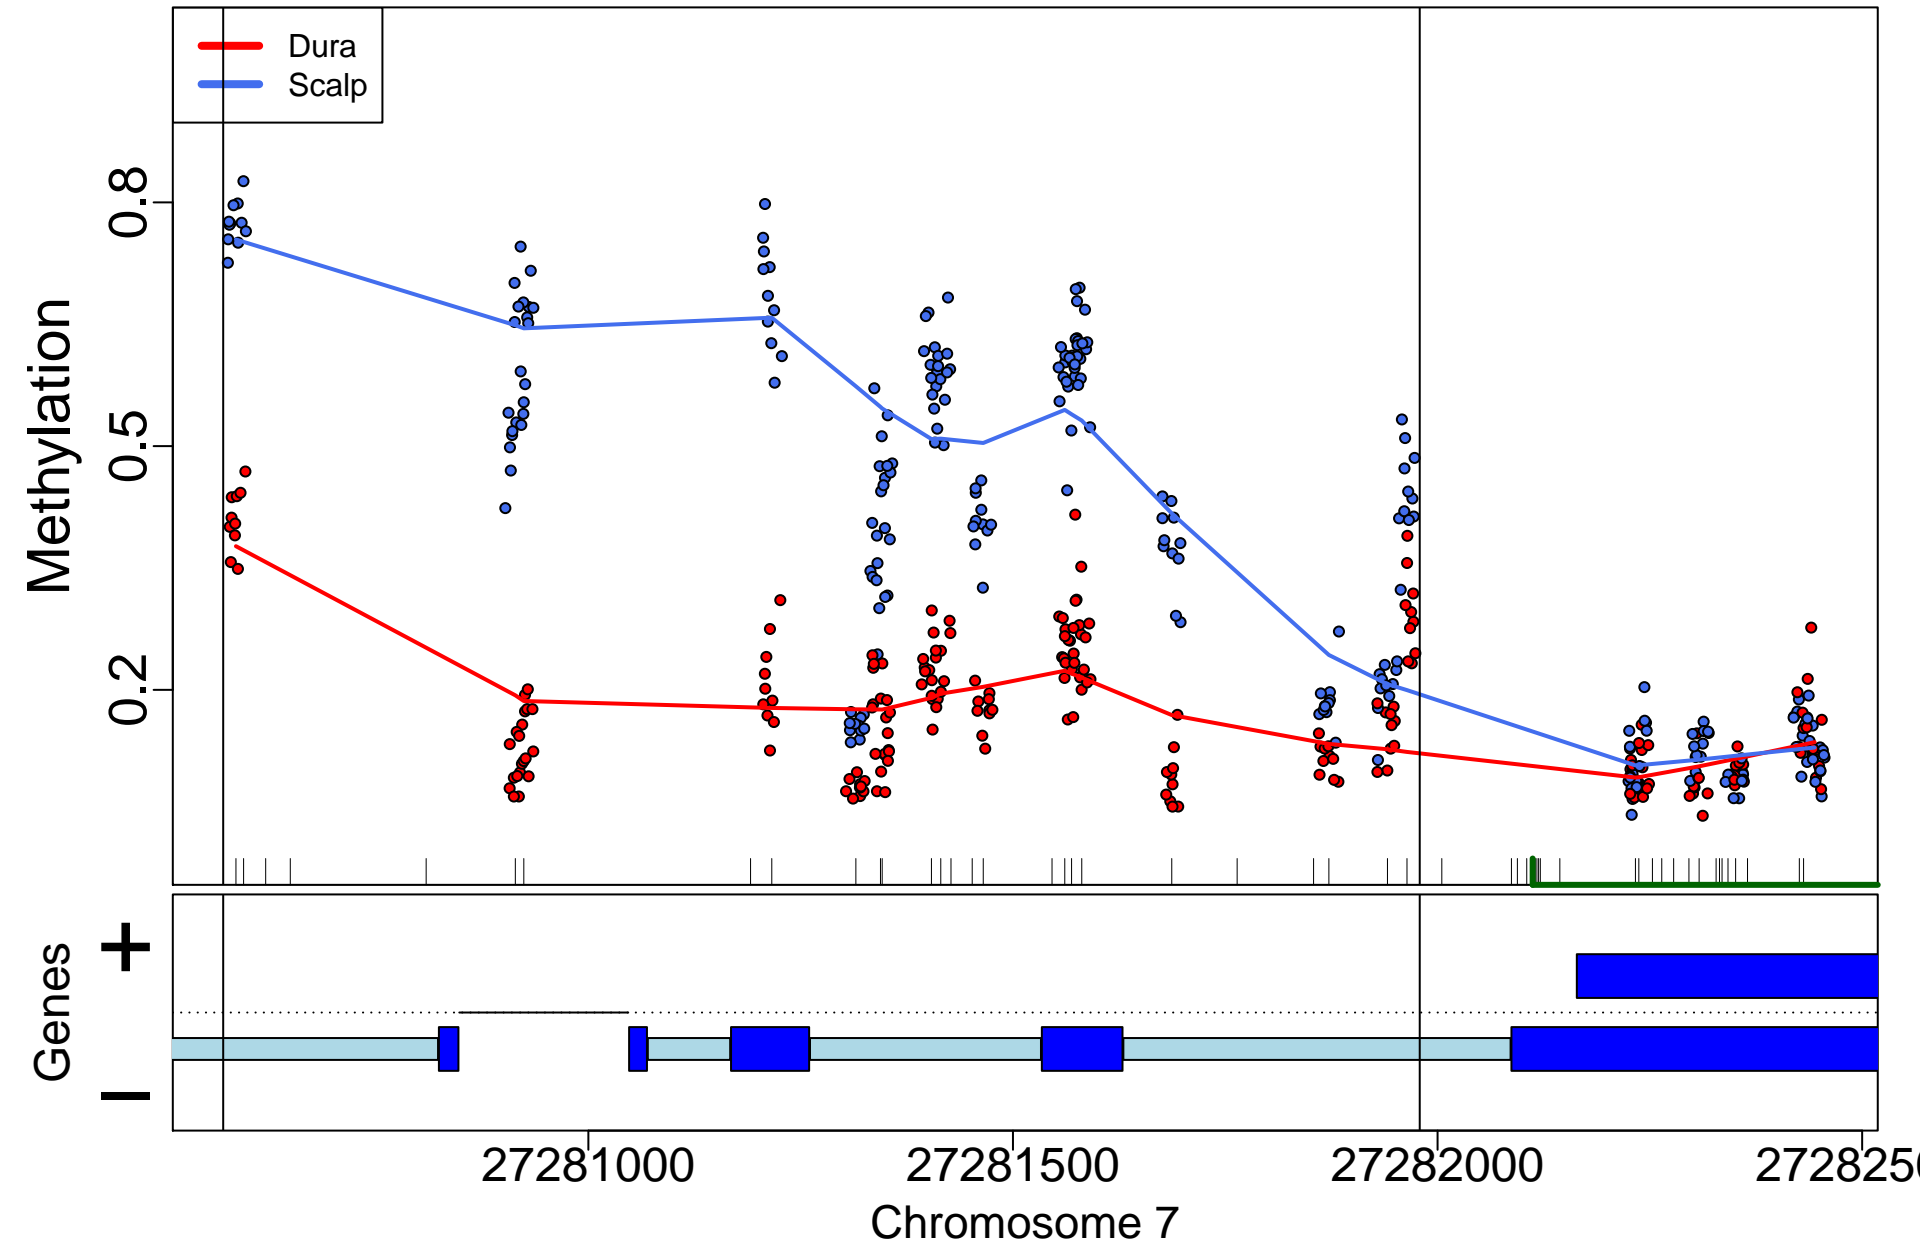



TNXB; 27198bp from tss:overlaps two exons

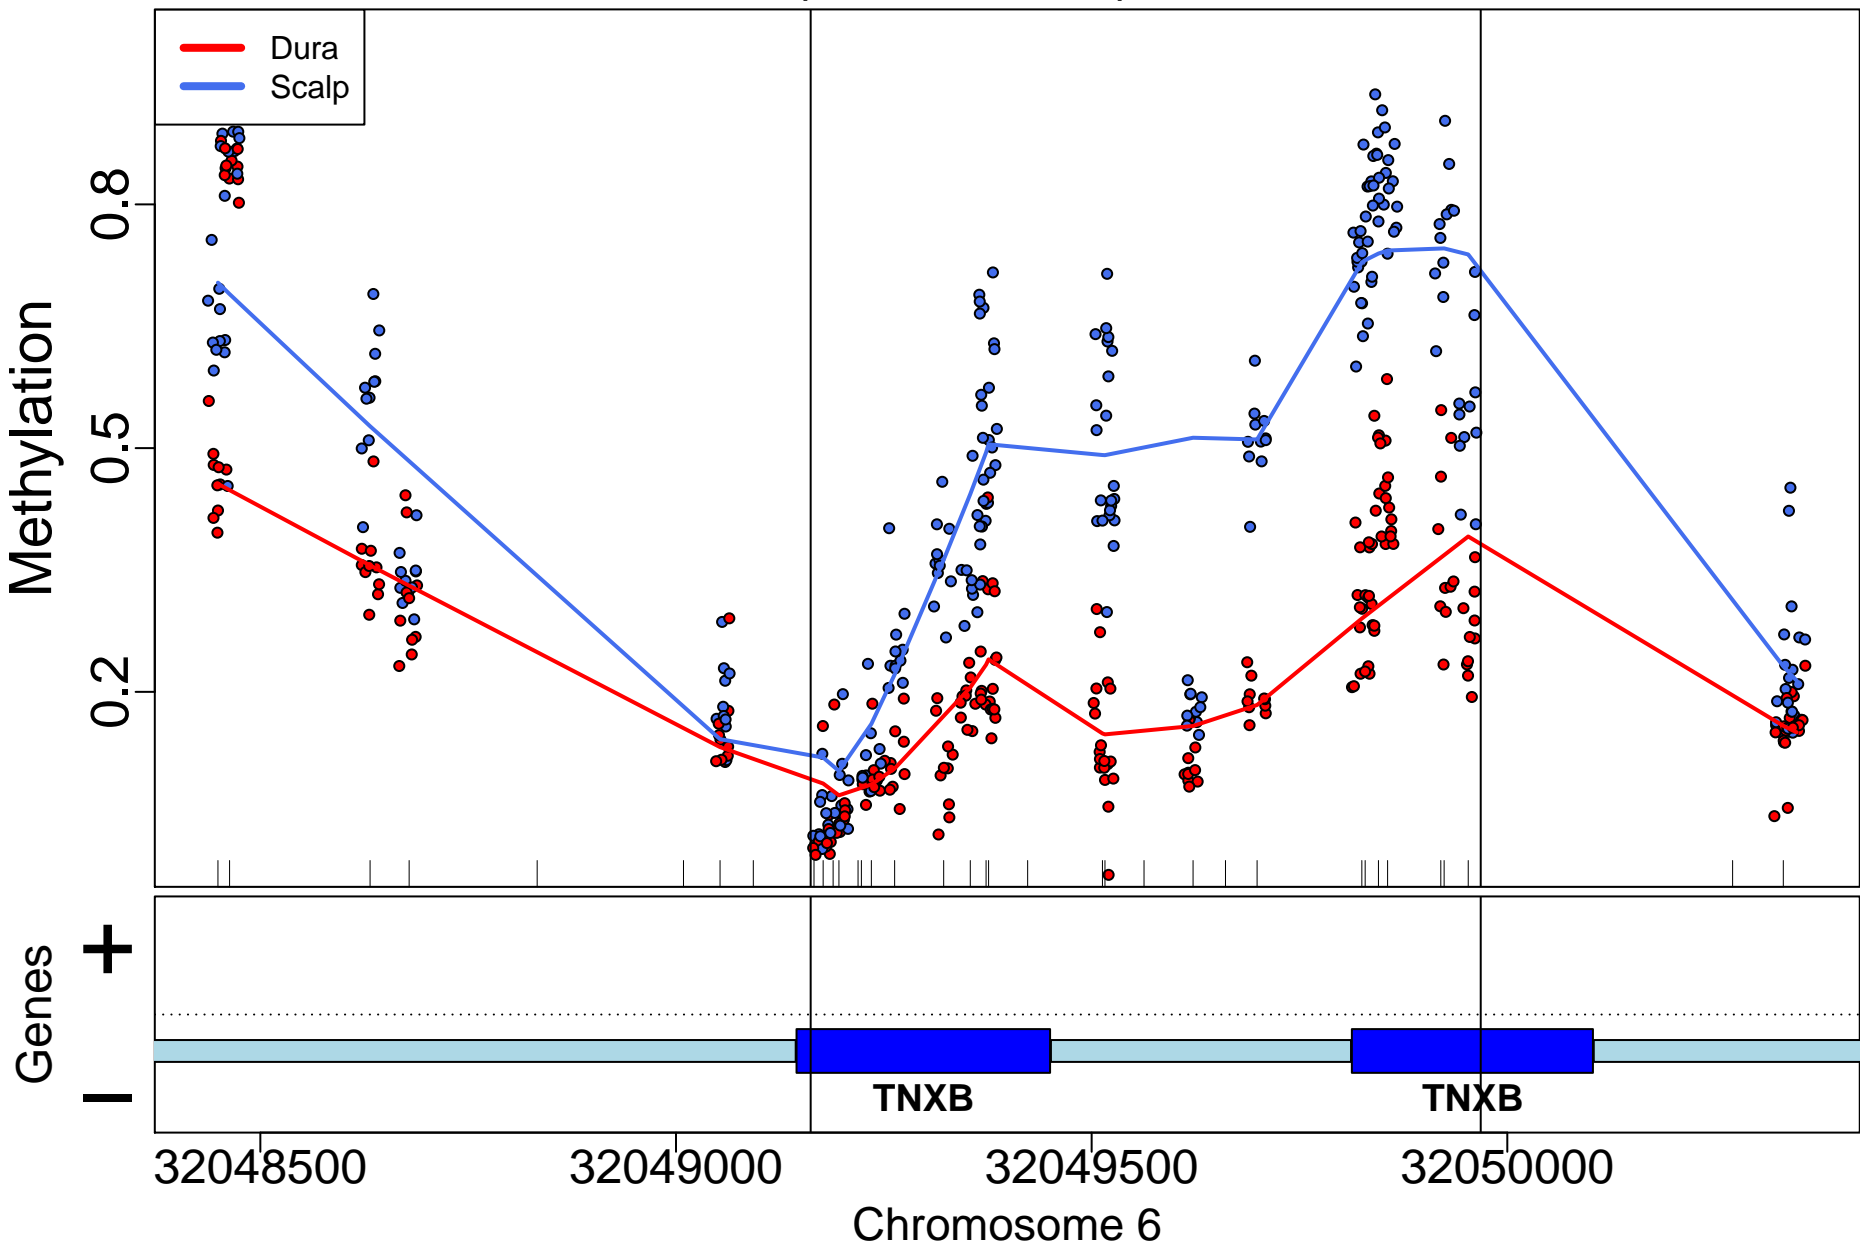

NR2F2; 16861bp from tss:downstream

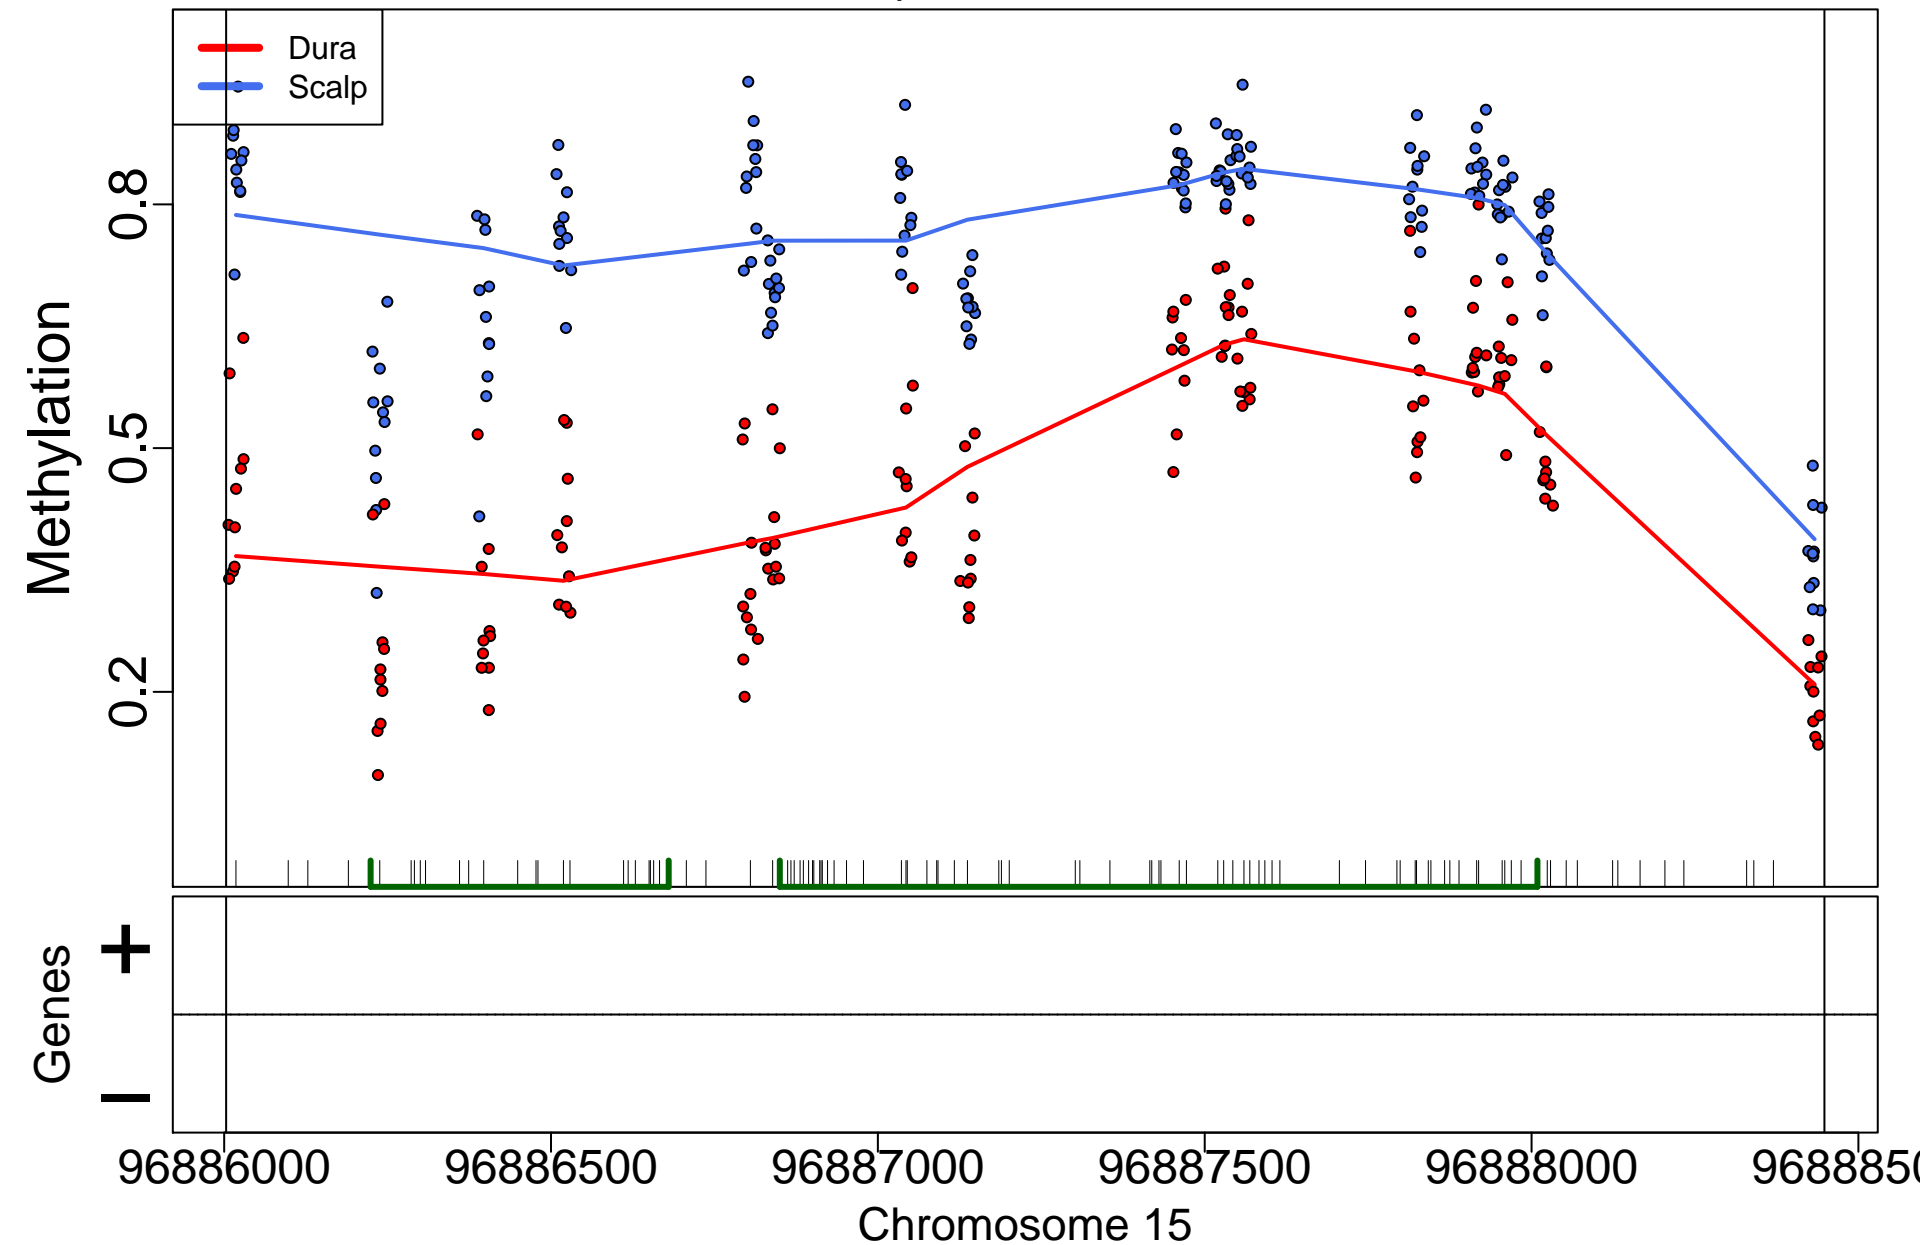



RP11-474D1.3; 0bp from tss:NA

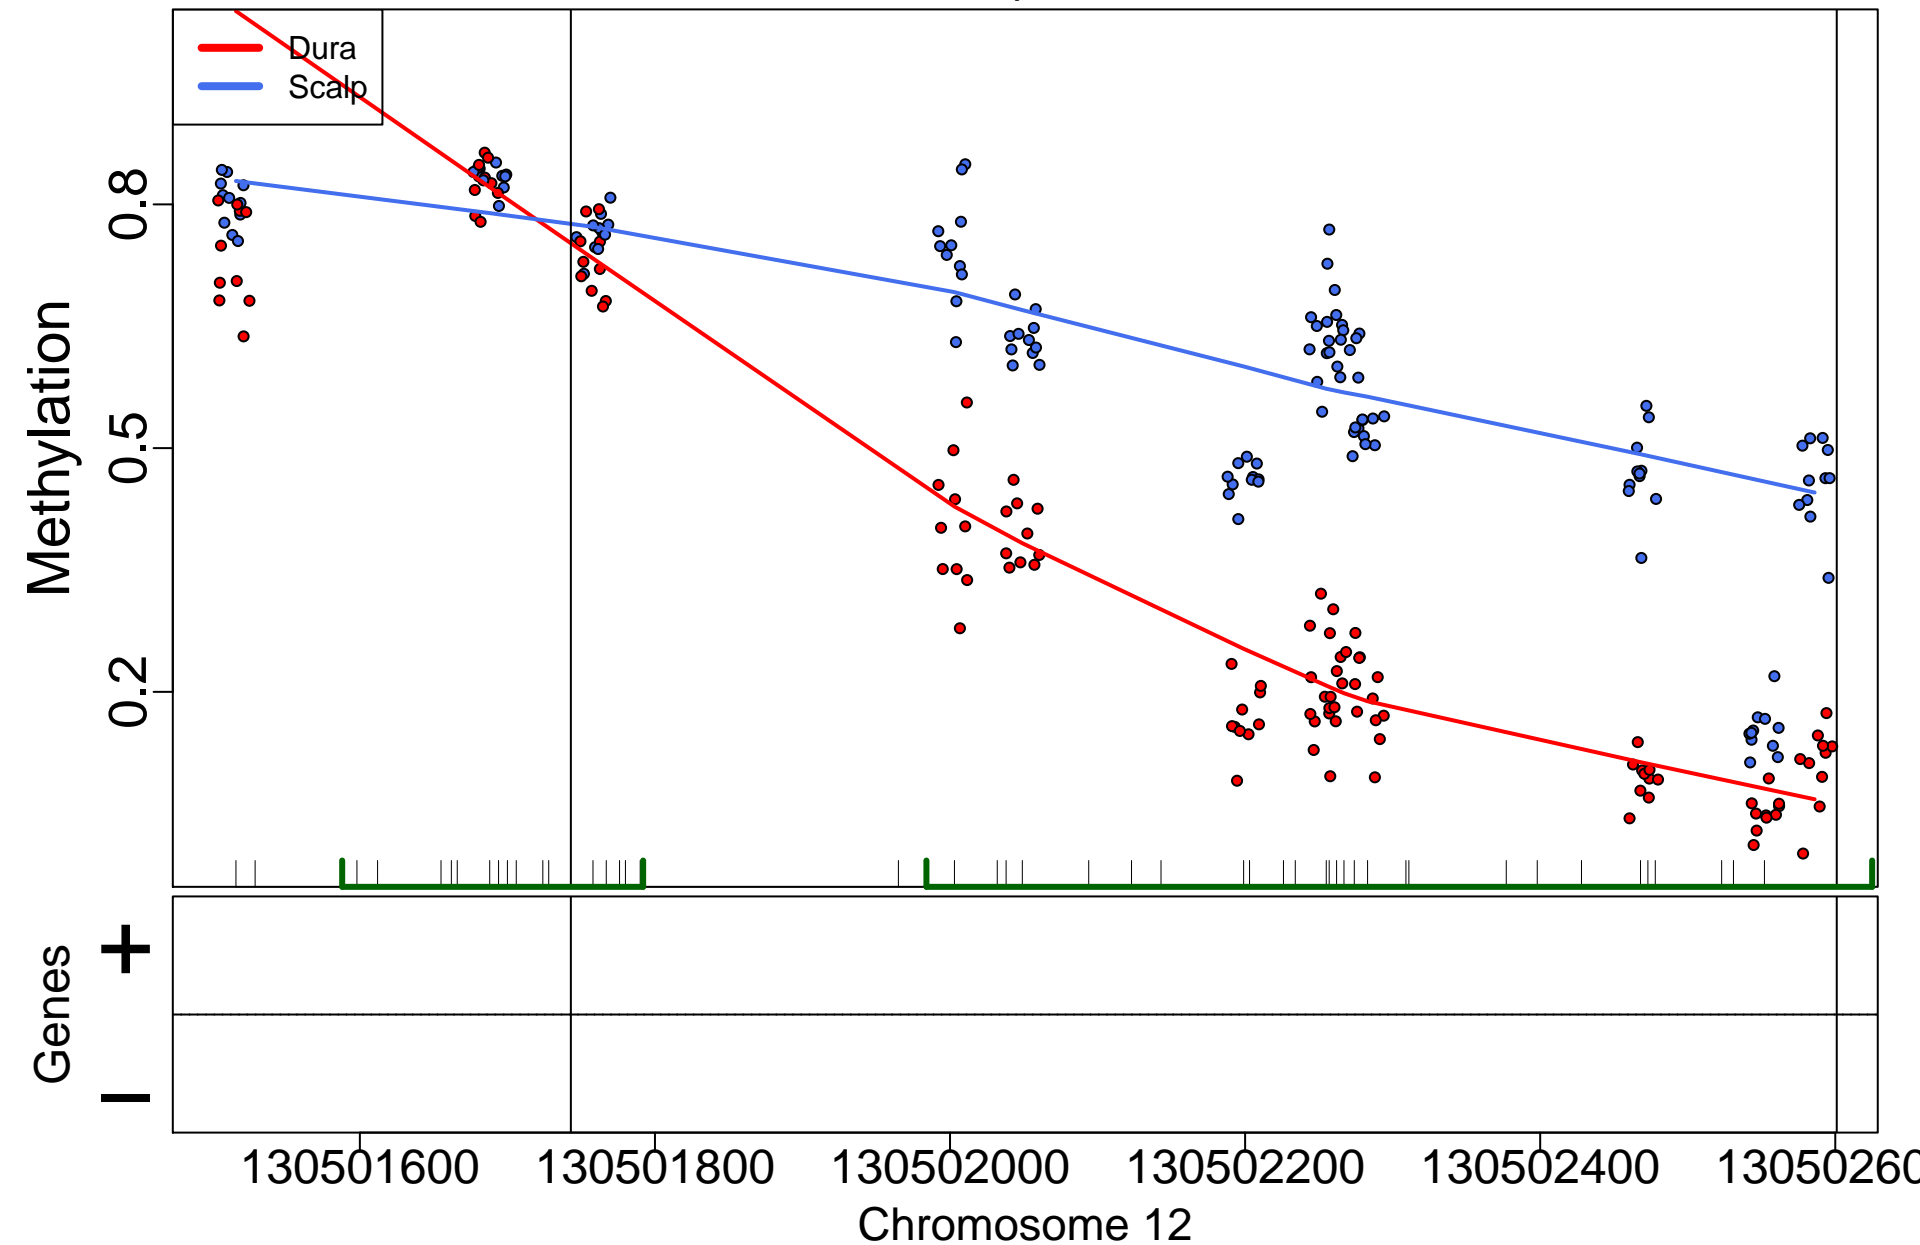

RAX; 3743bp from tss:overlaps exon upstream

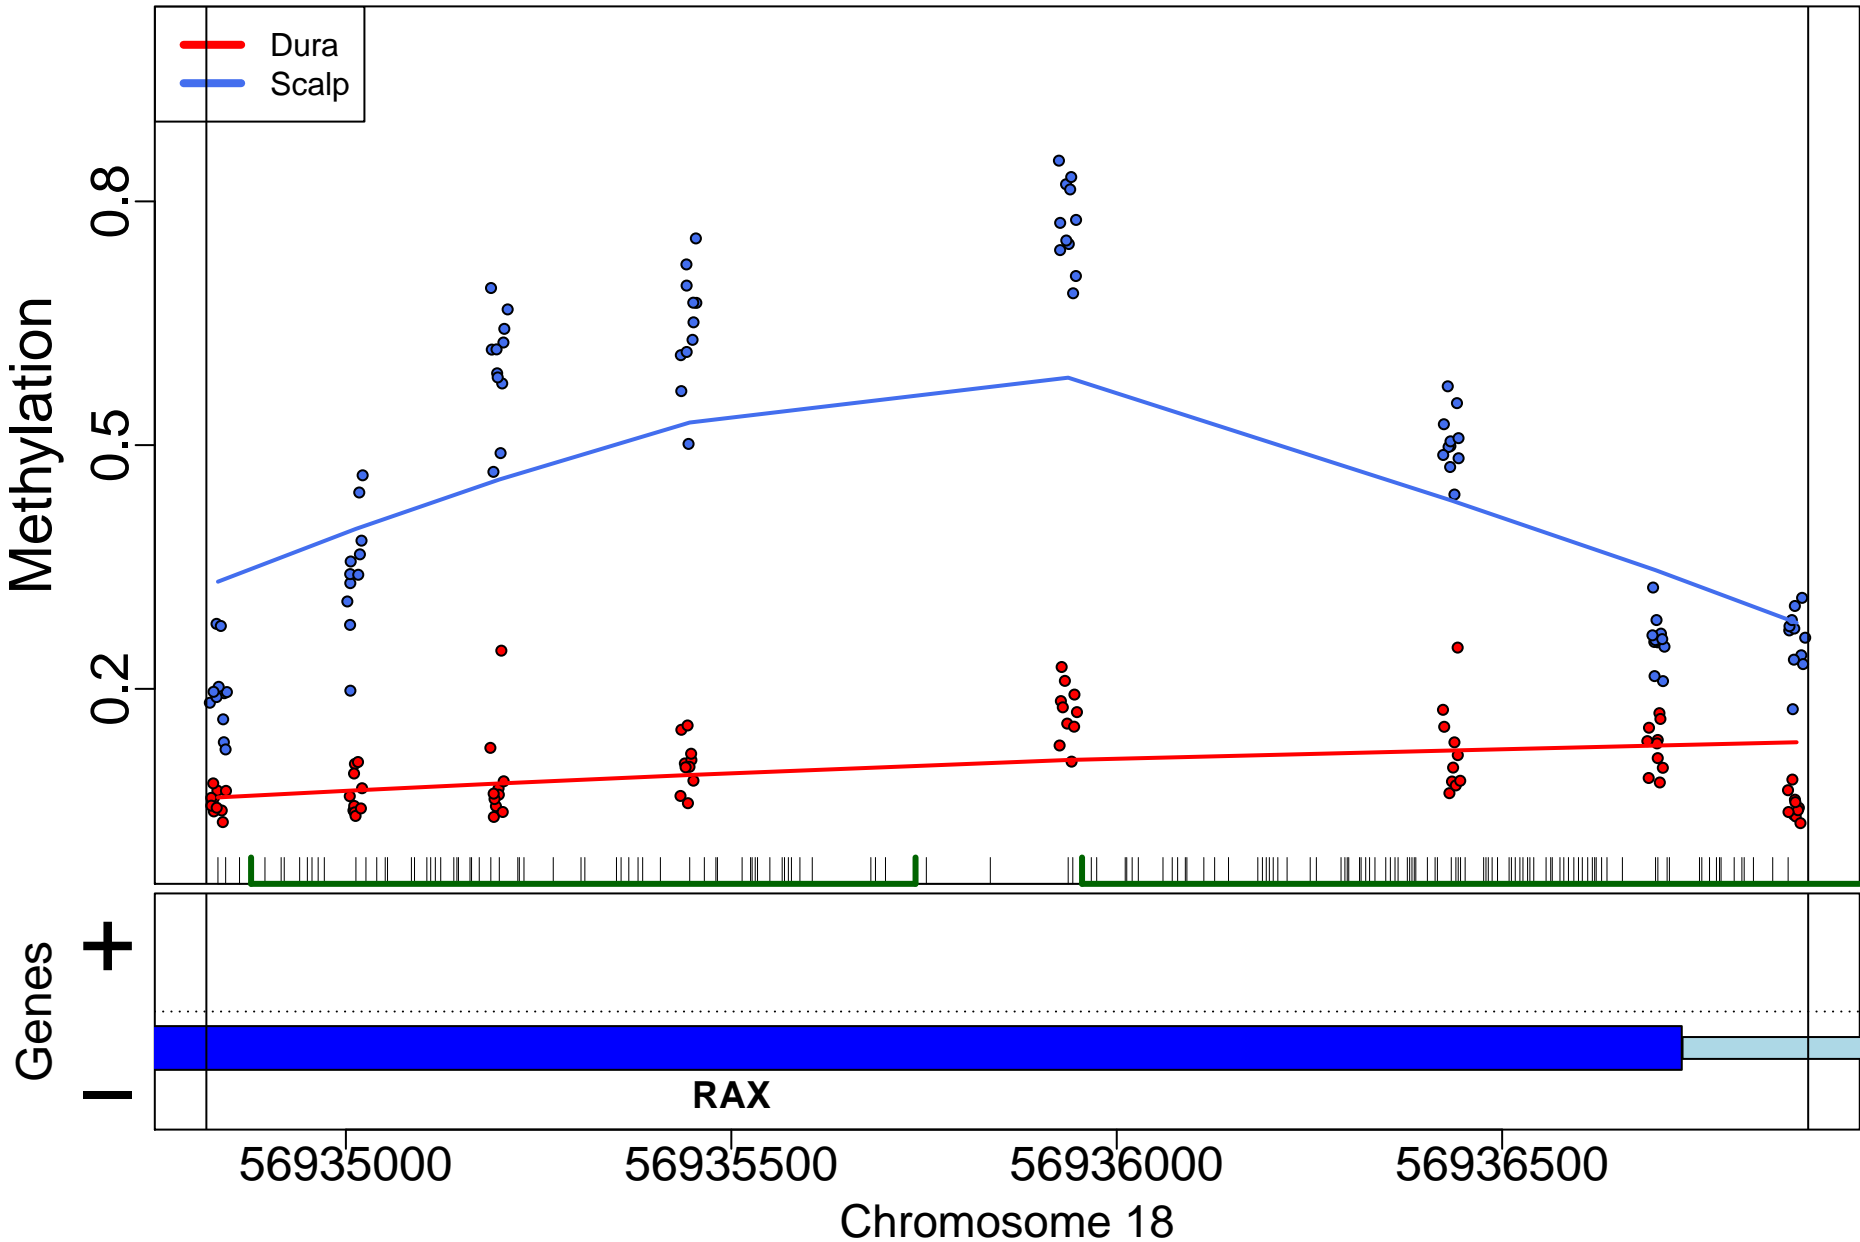

BARHL2; 9196bp from tss:upstream

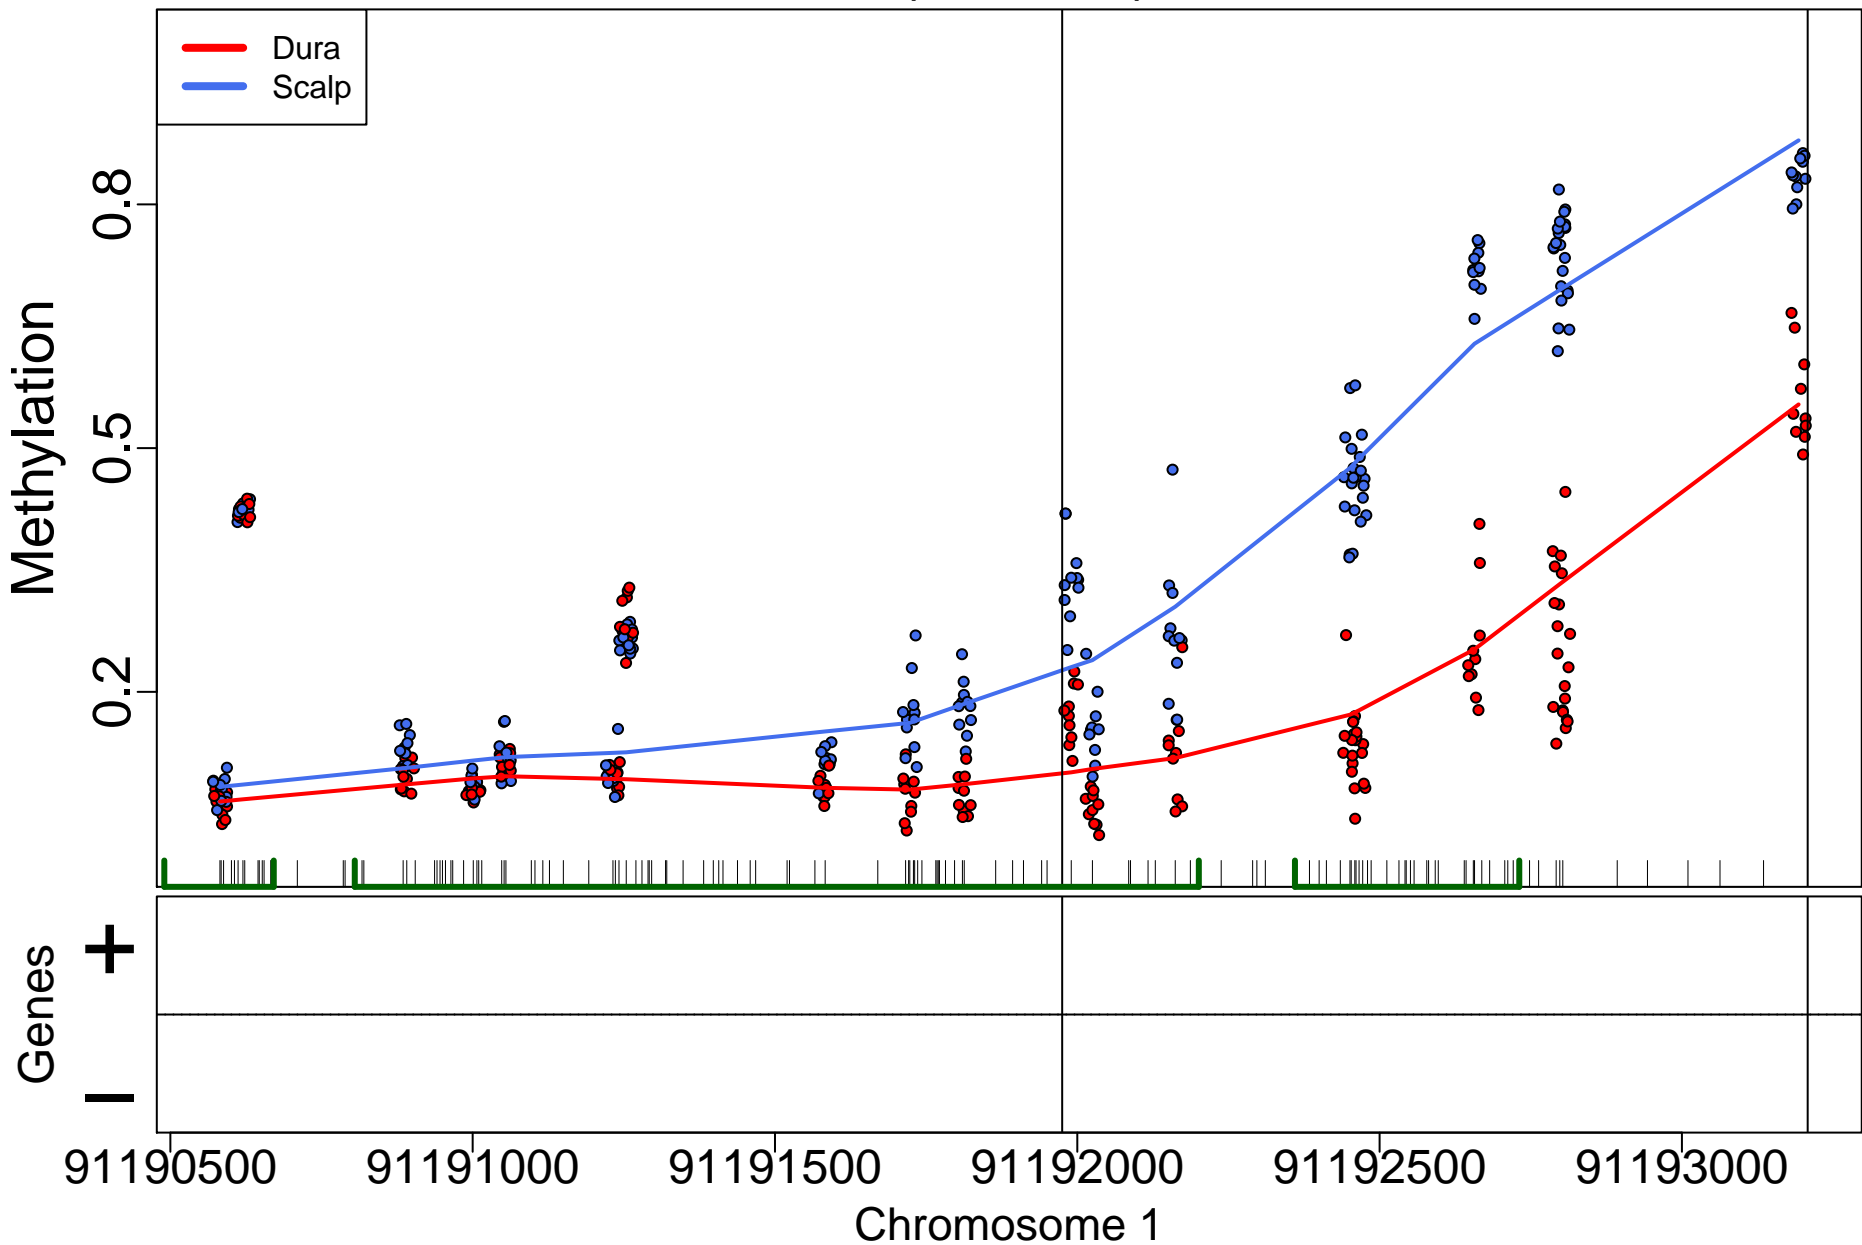

IRX6; 5758bp from tss:overlaps 3'

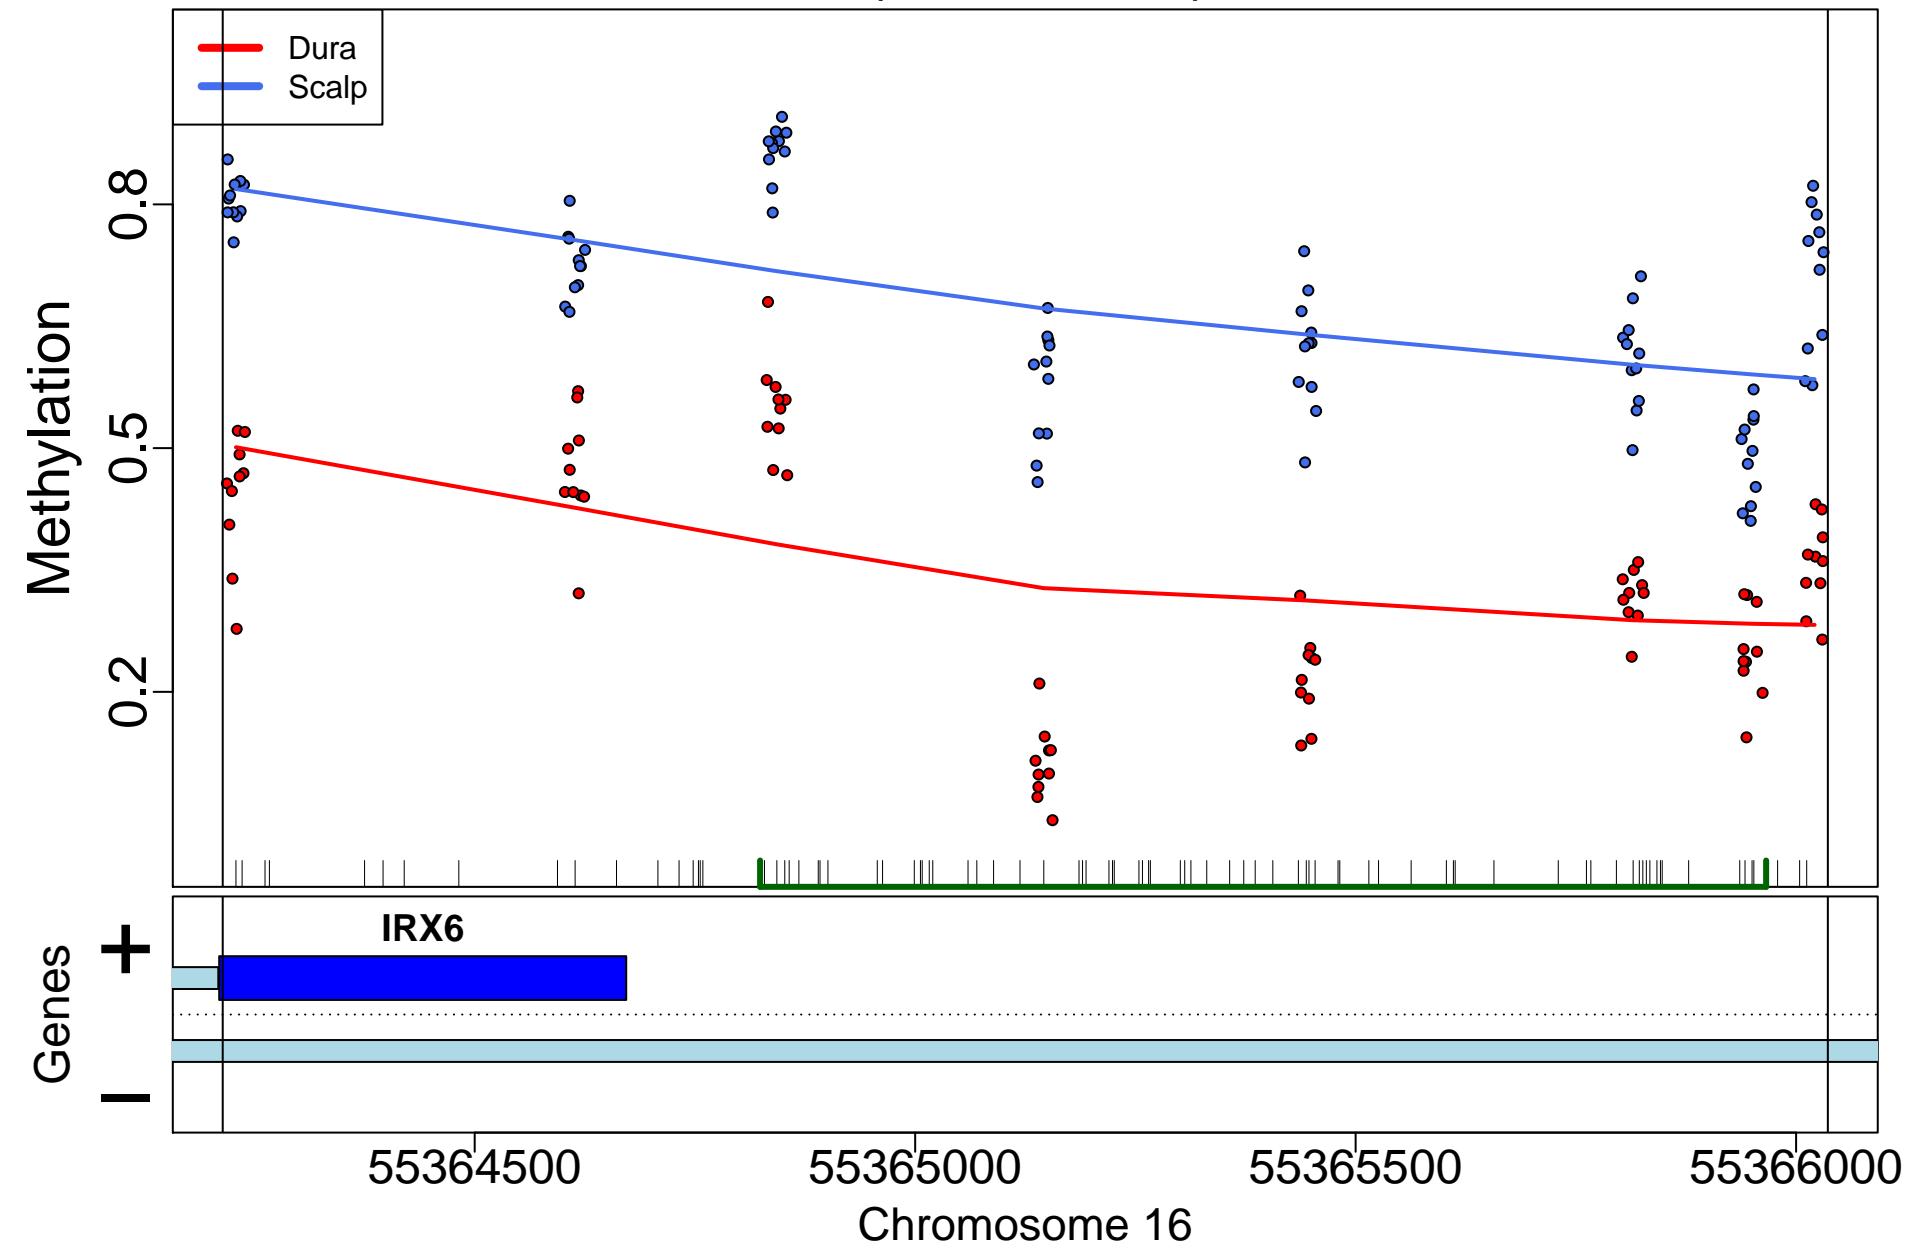

AGAP1; 464254bp from tss:inside intron

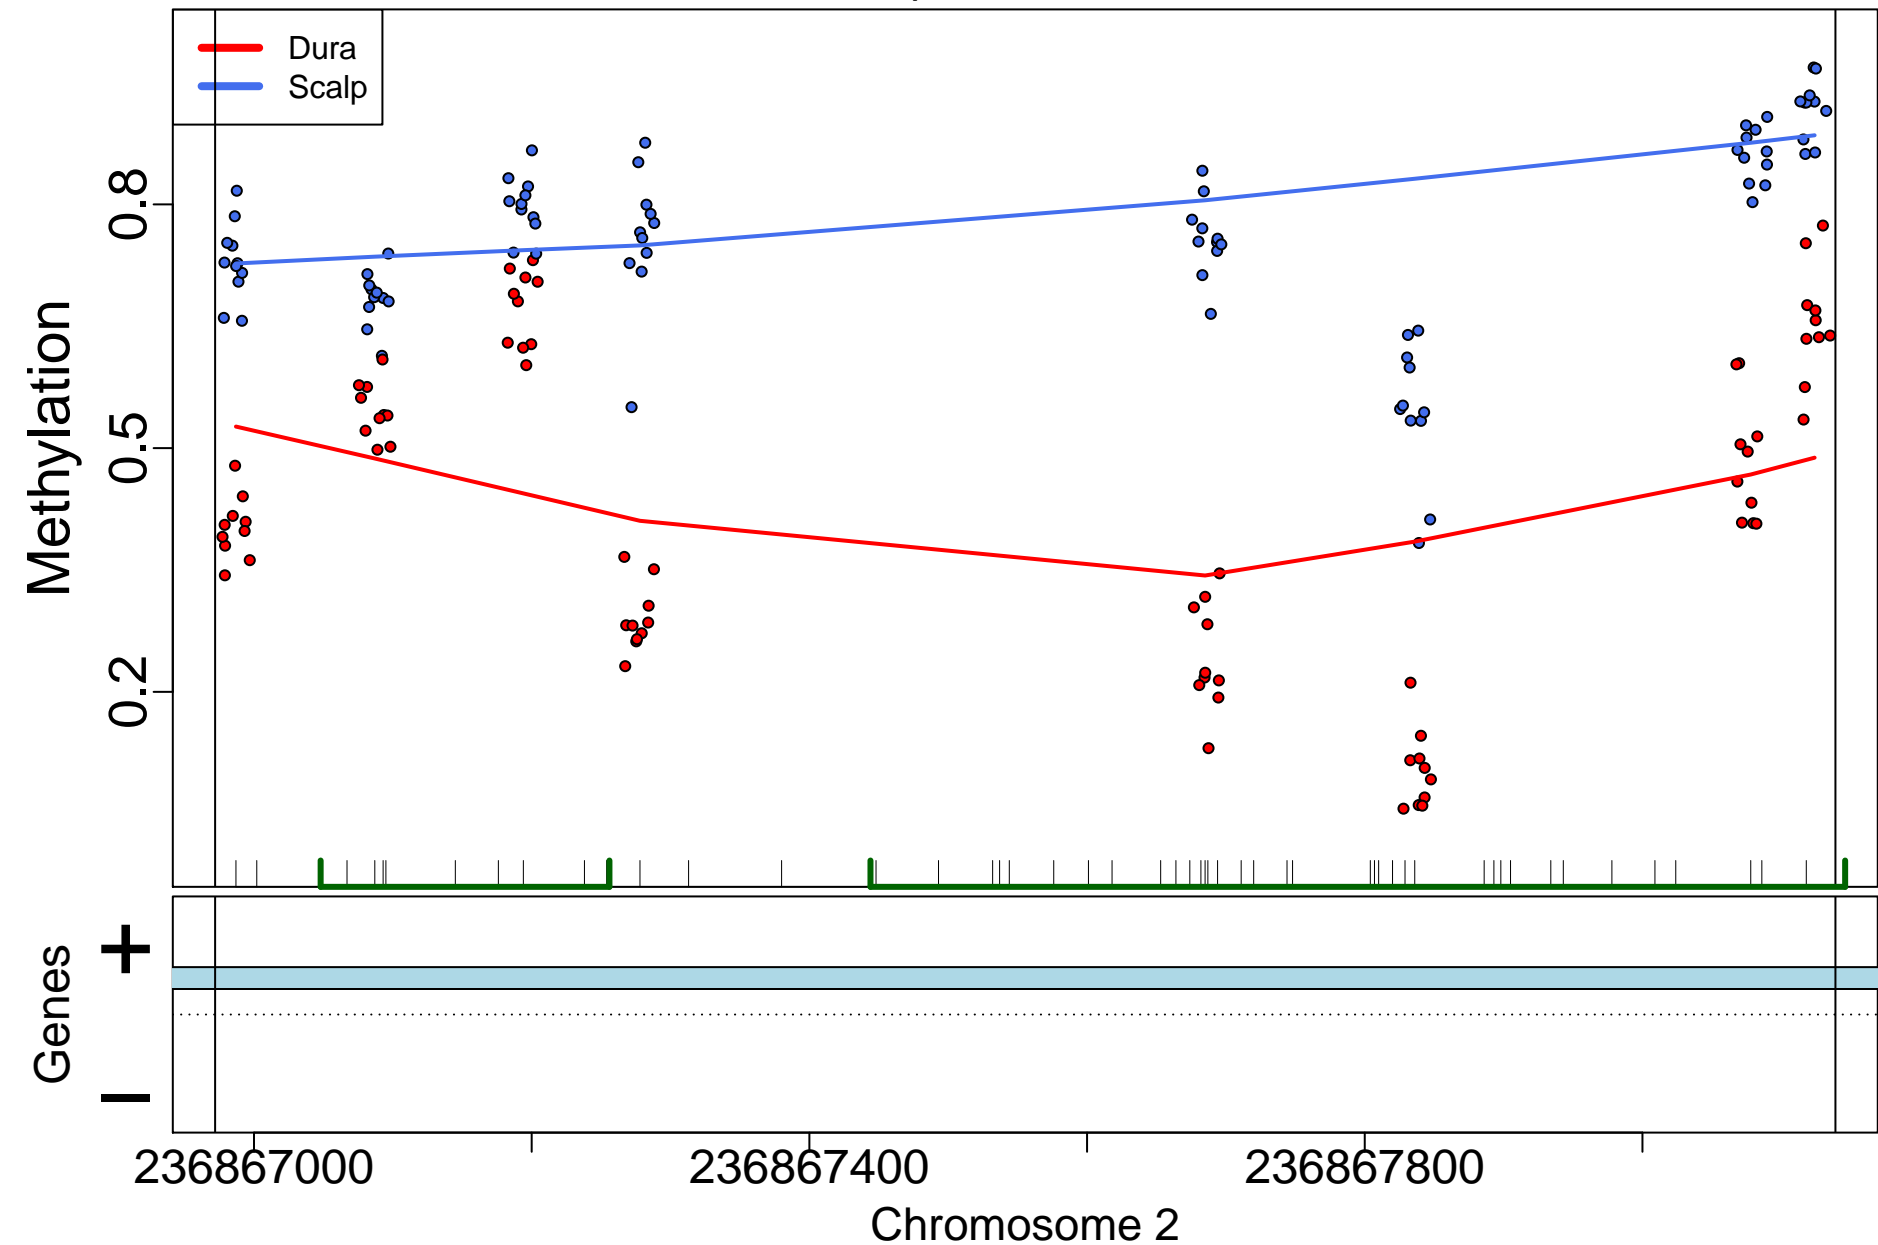



RUNX2; 312743bp from tss:downstream

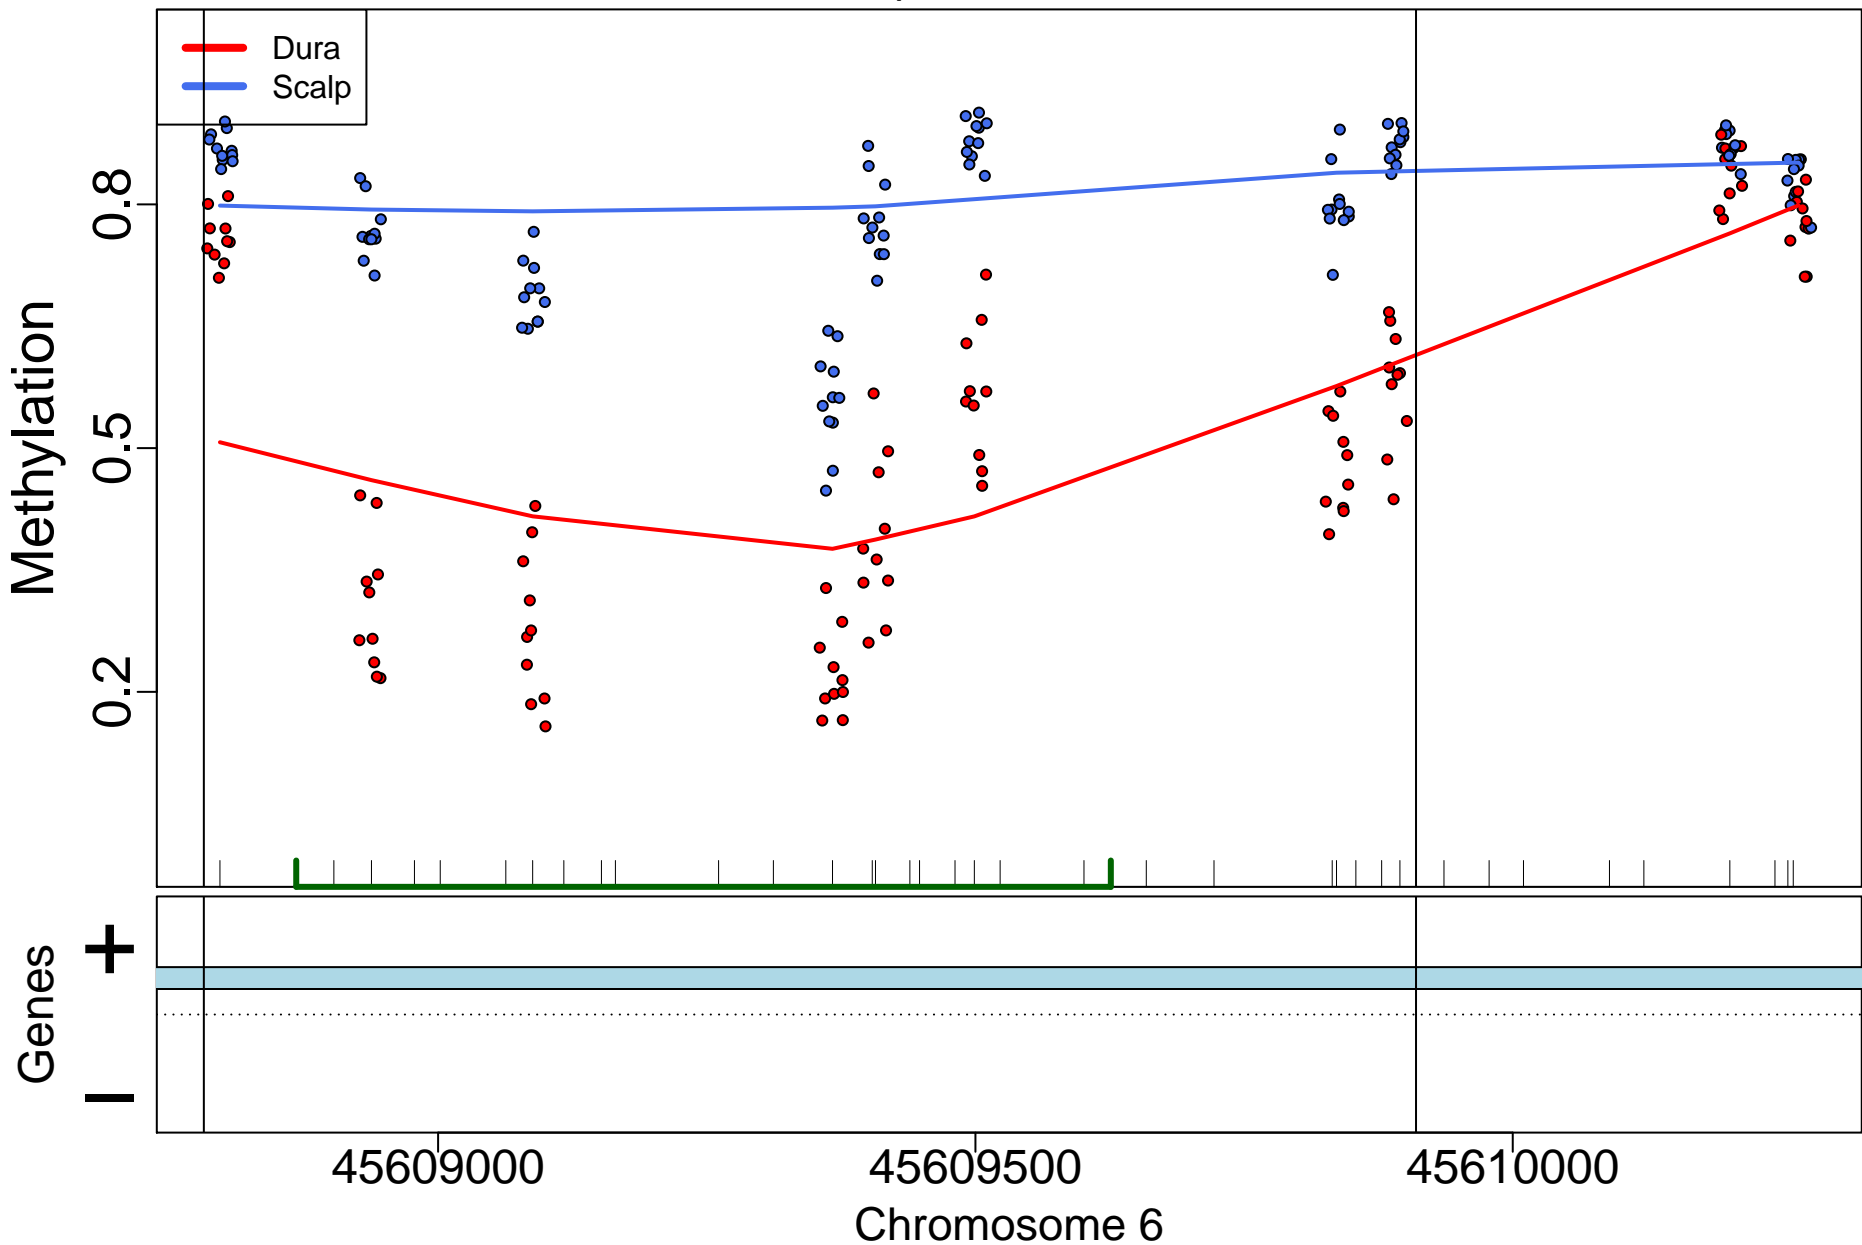

TMEM174; 60639bp from tss:downstream

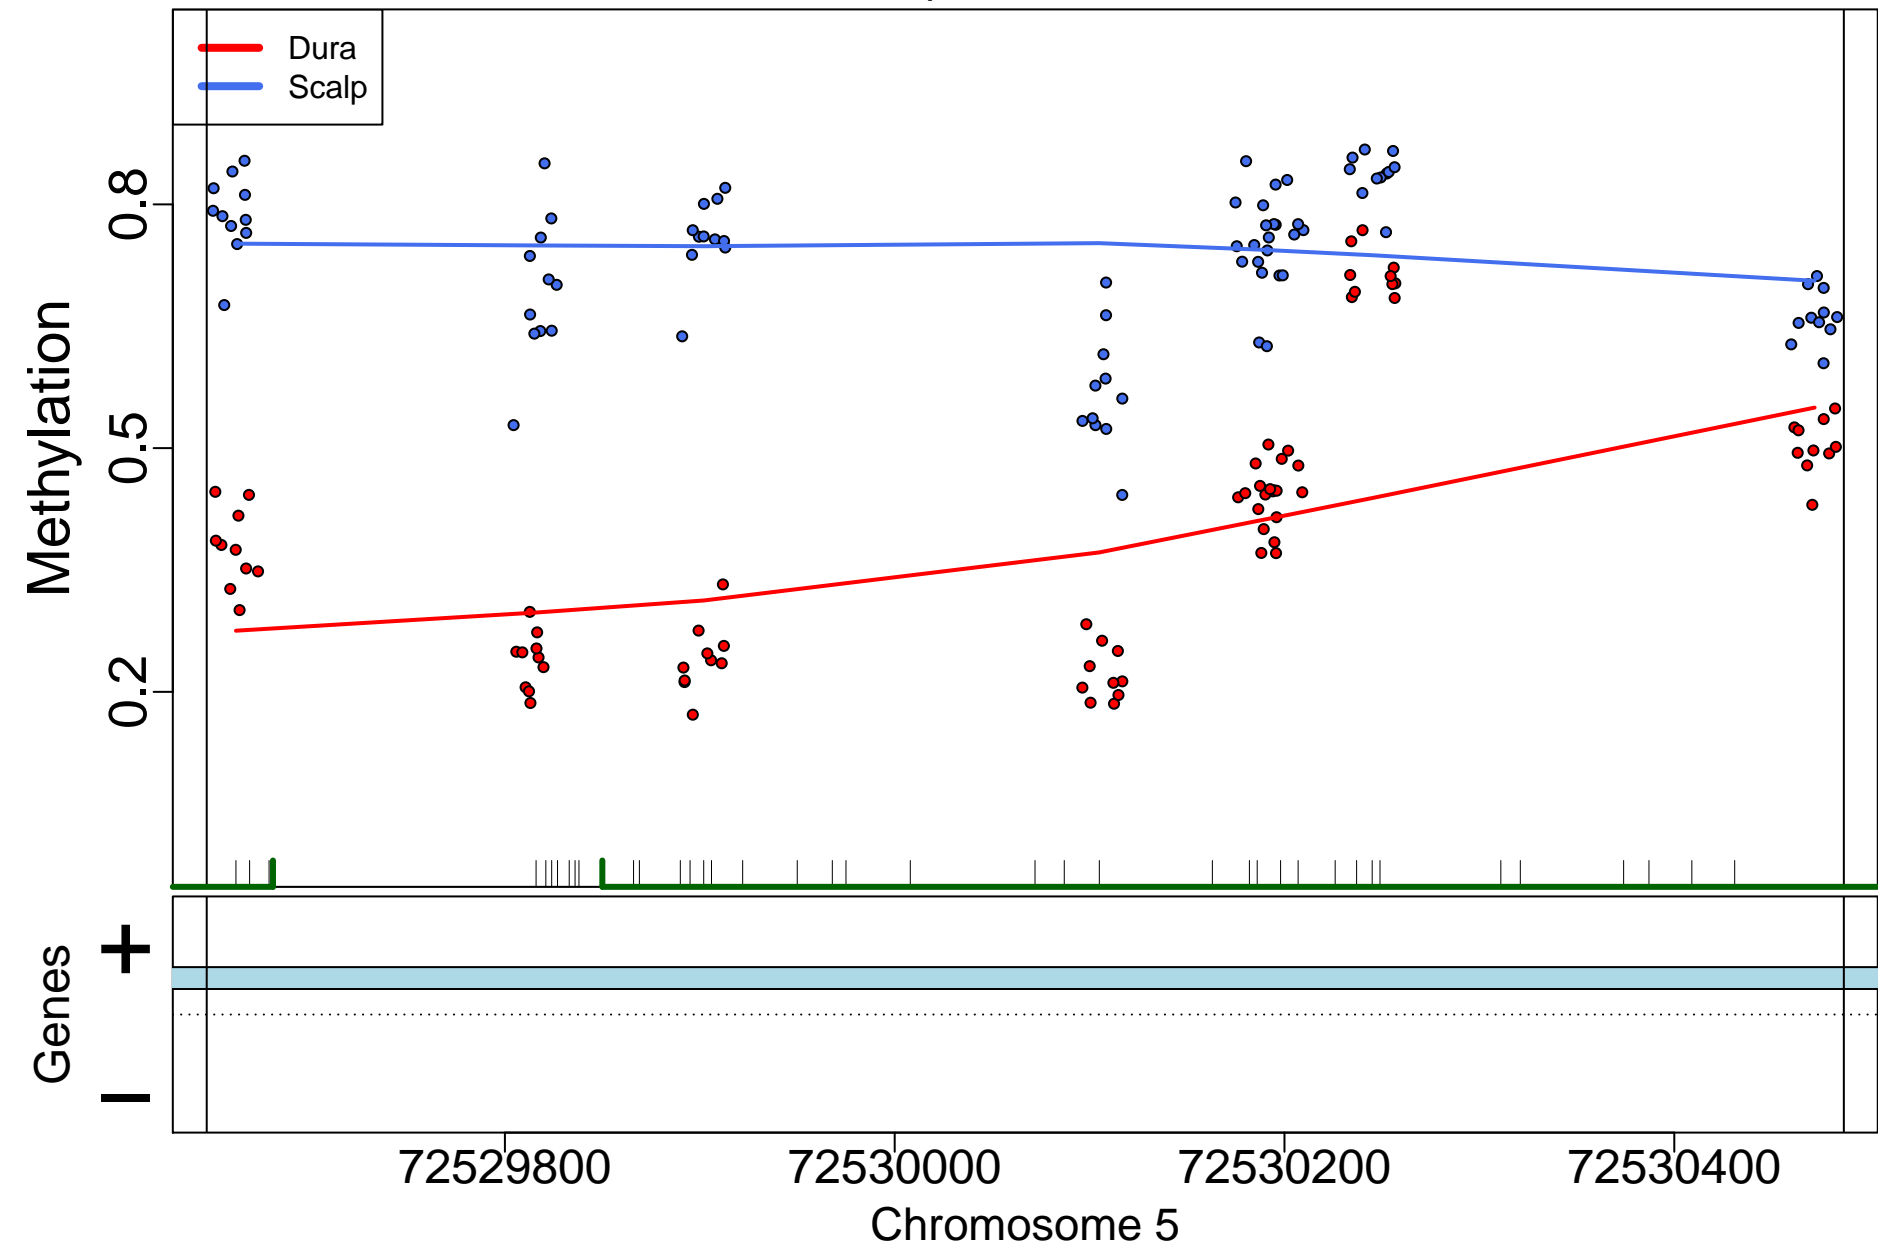

CCR6; 94913bp from tss:inside intron

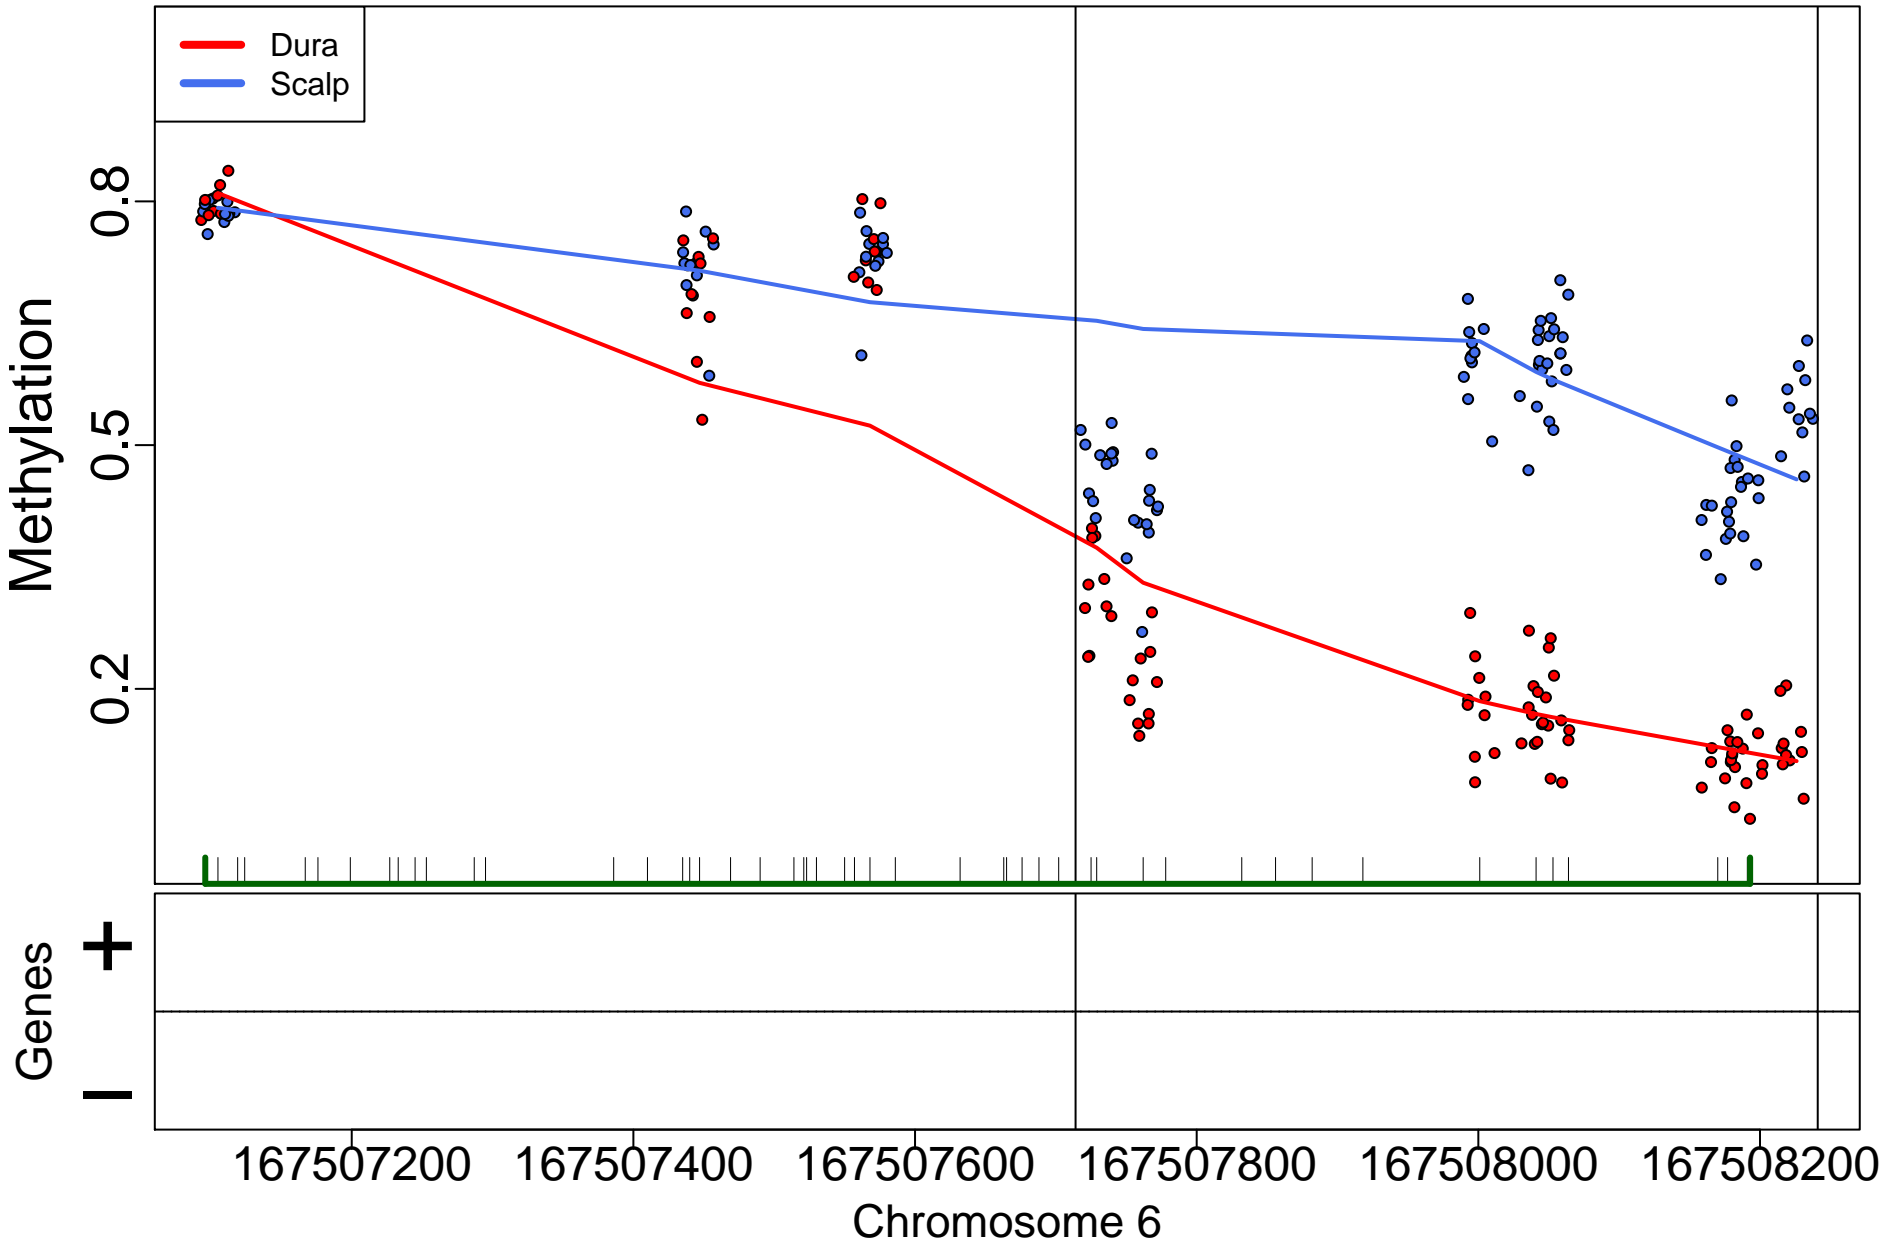

ACSF3; 40554bp from tss:upstream

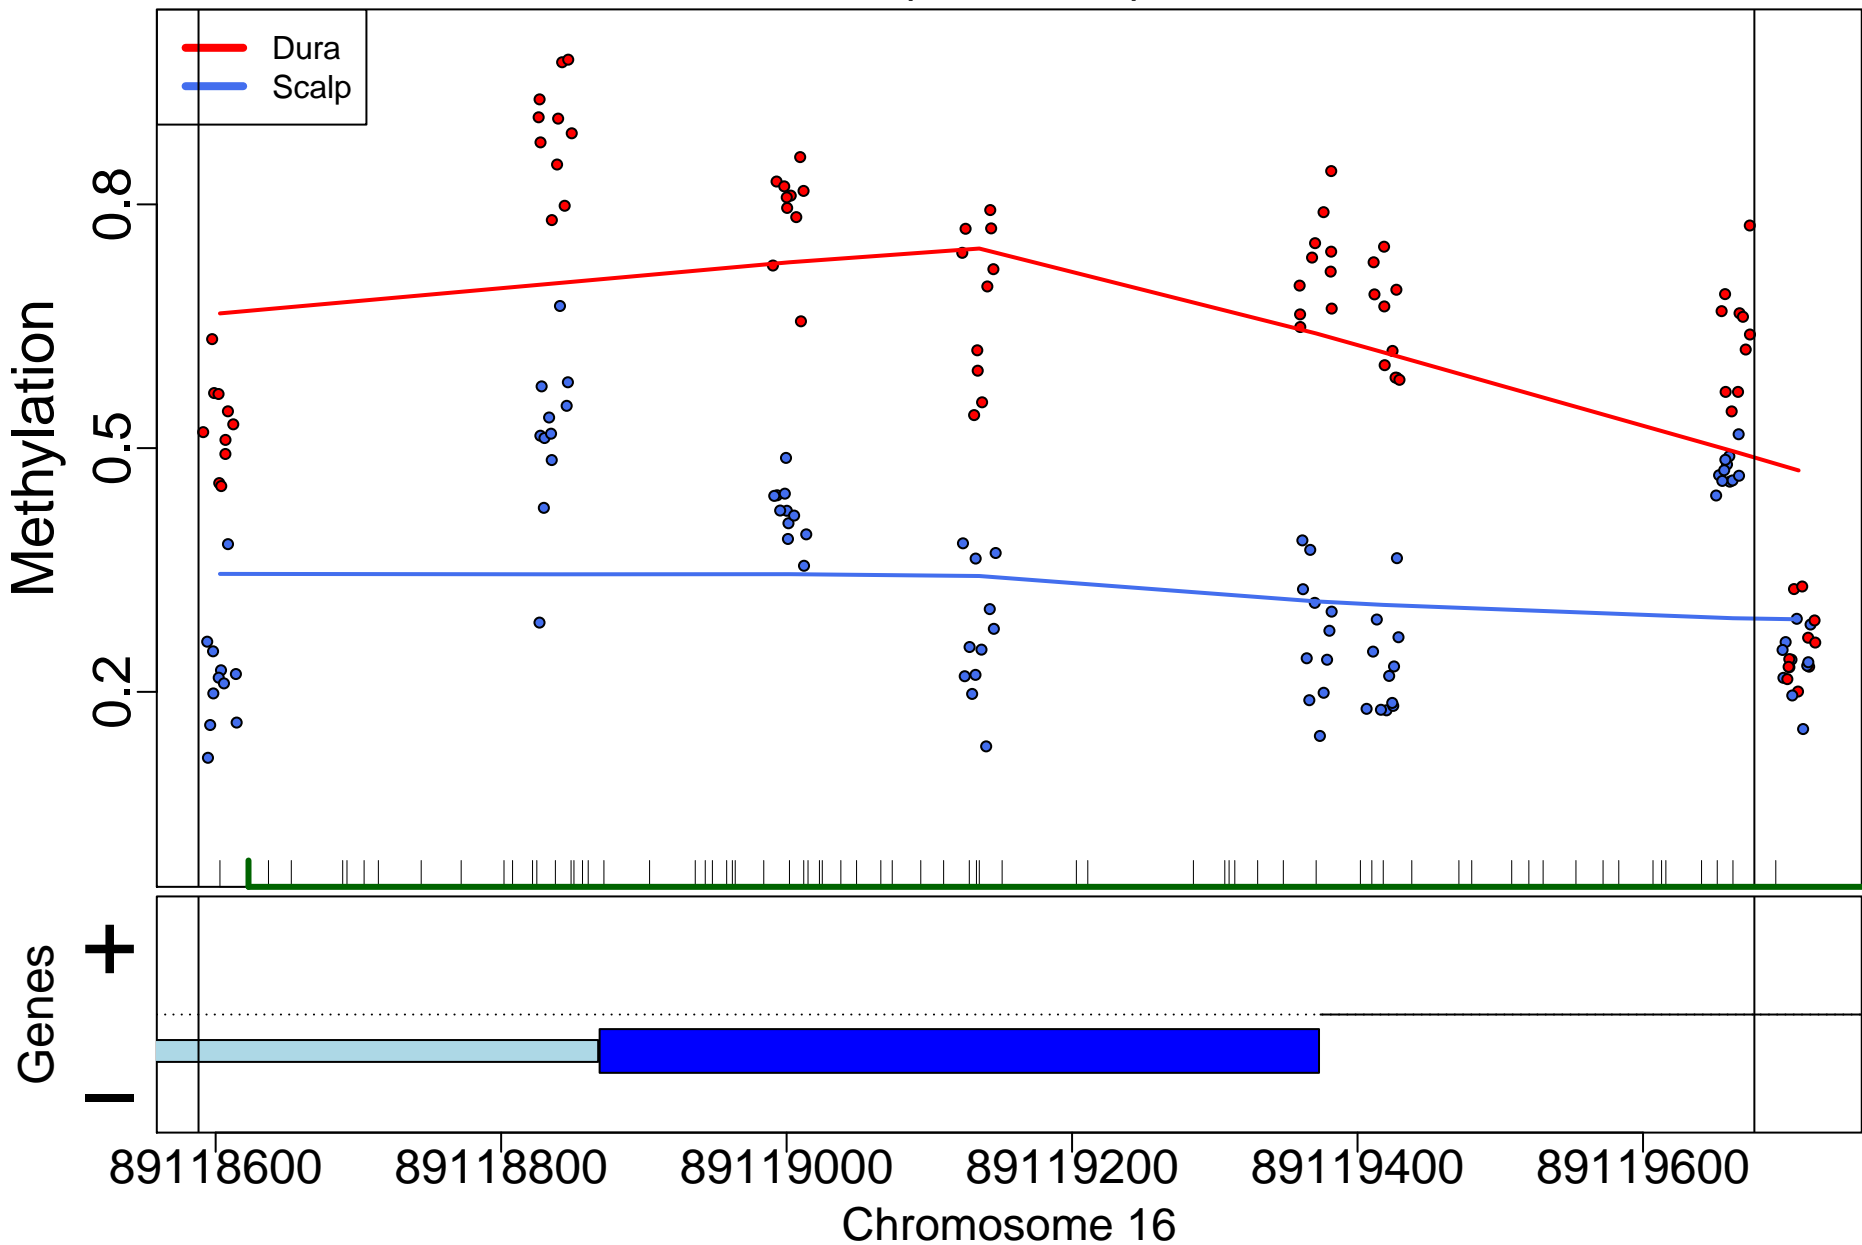

FOXP2; 0bp from tss:NA

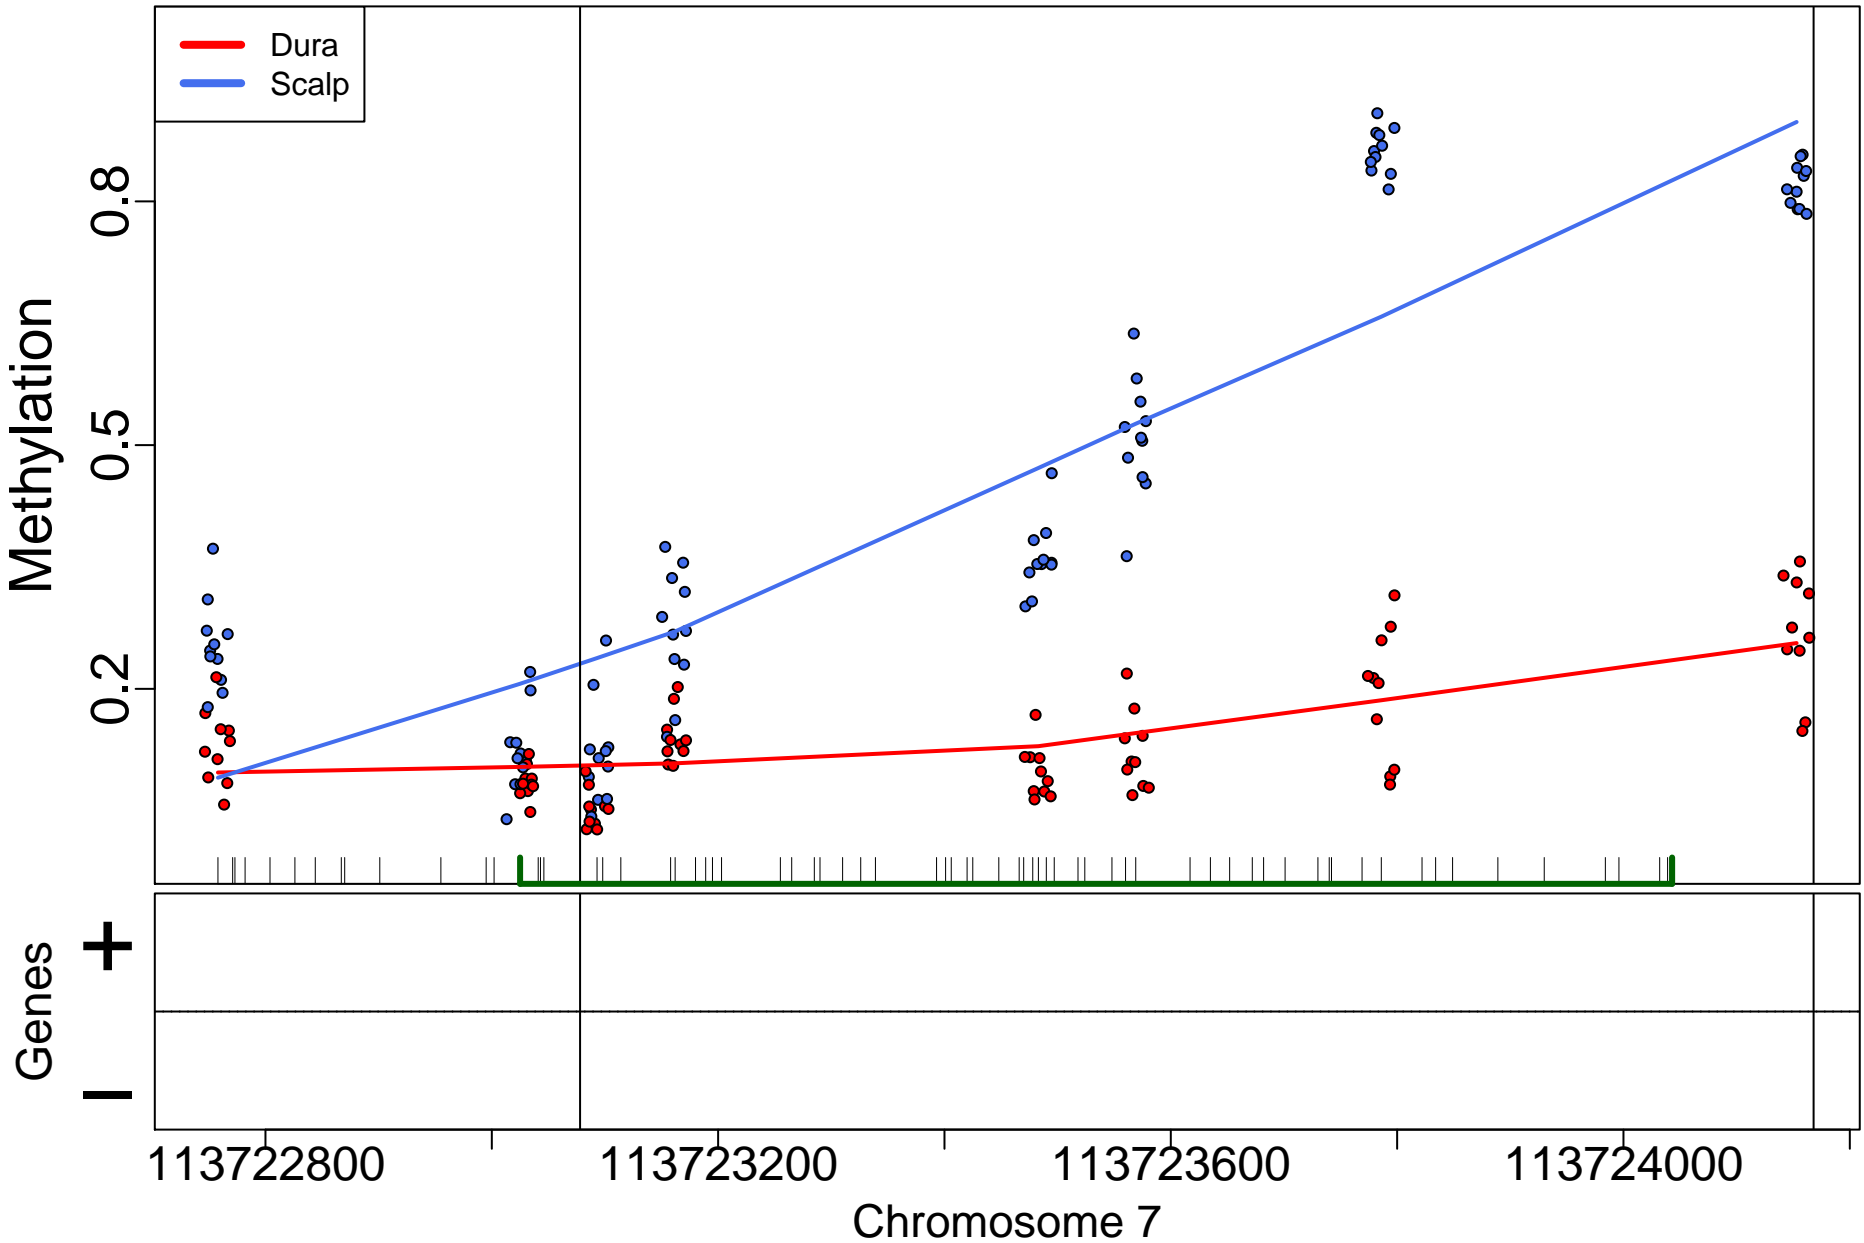

# HOXD11; 0bp from tss:NA

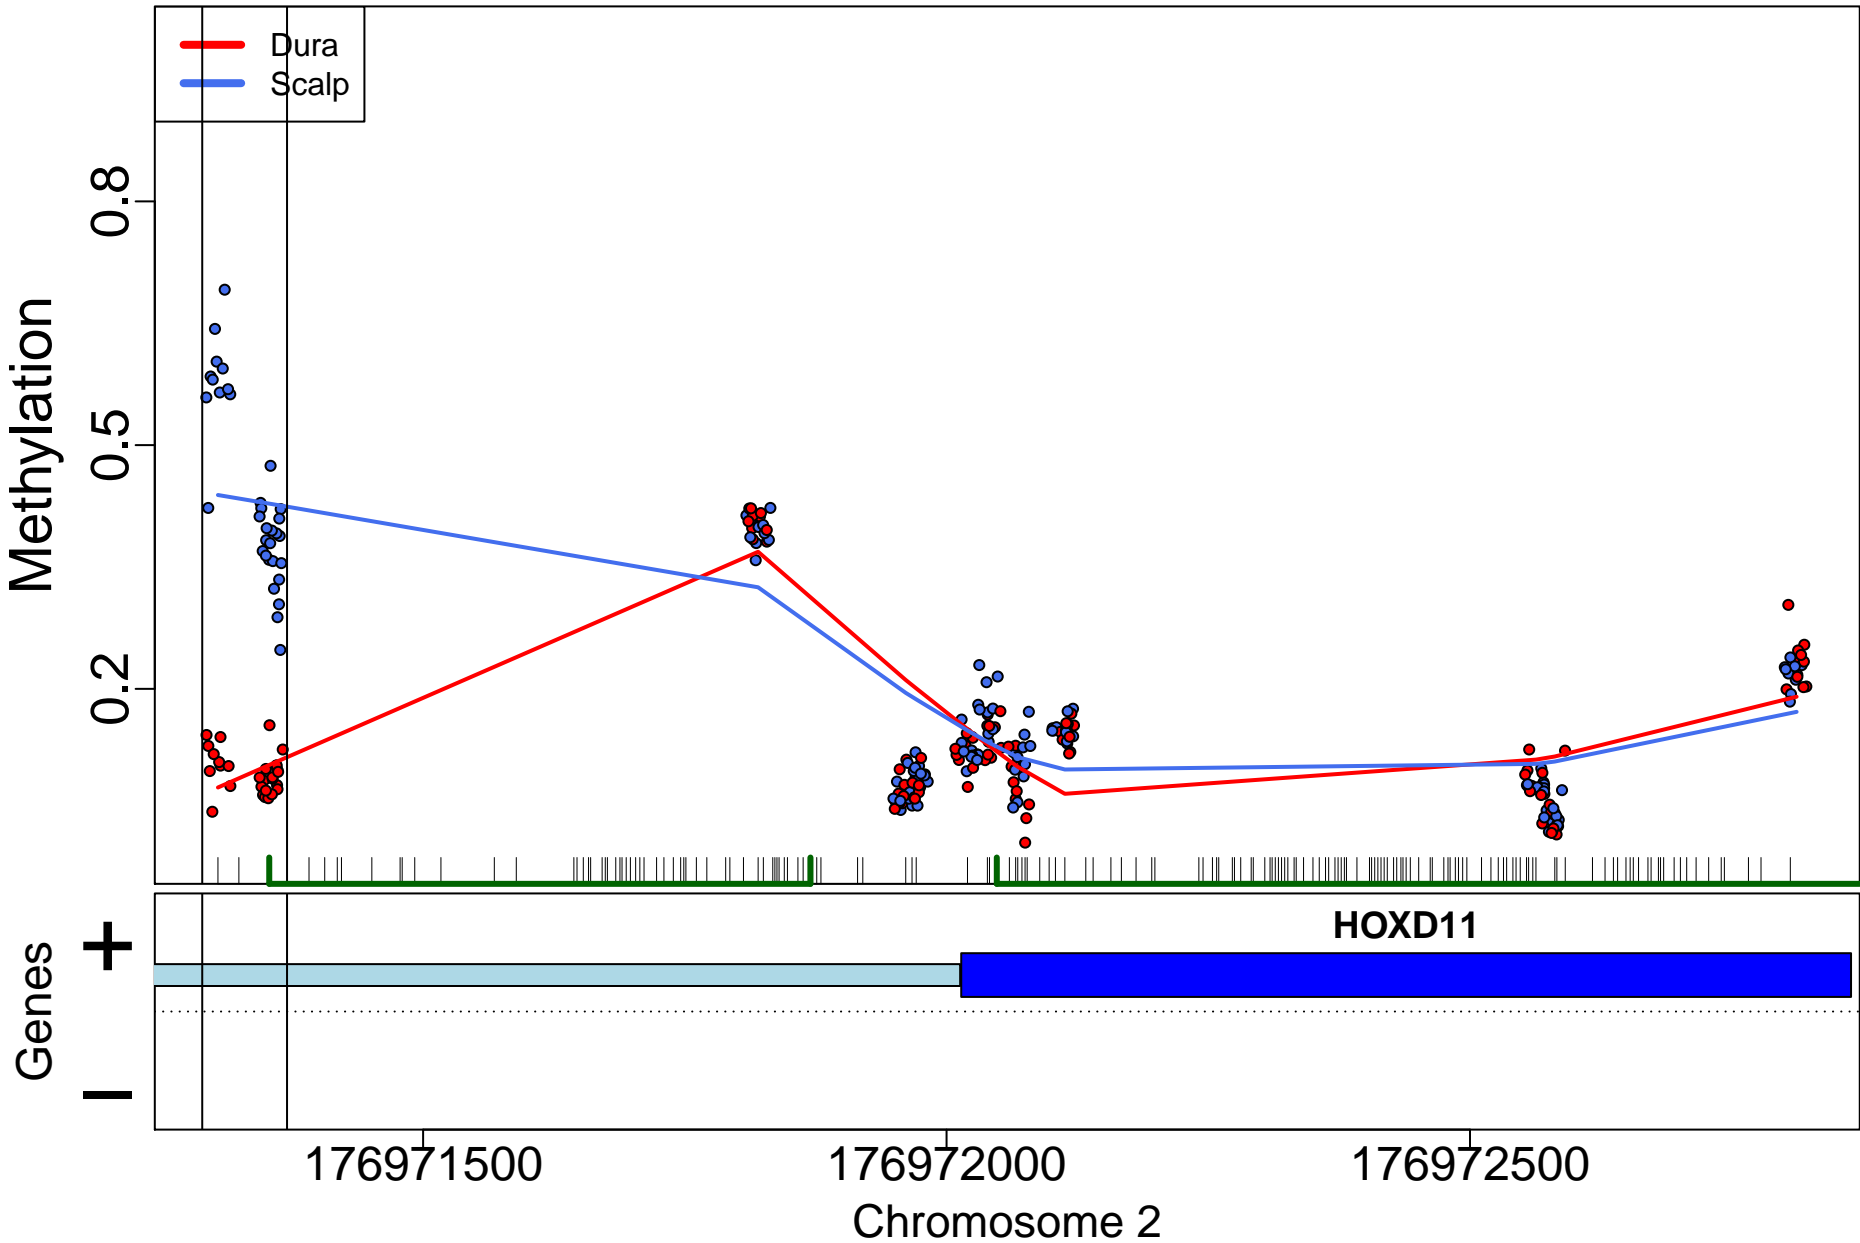

# KIF25; 0bp from tss:NA

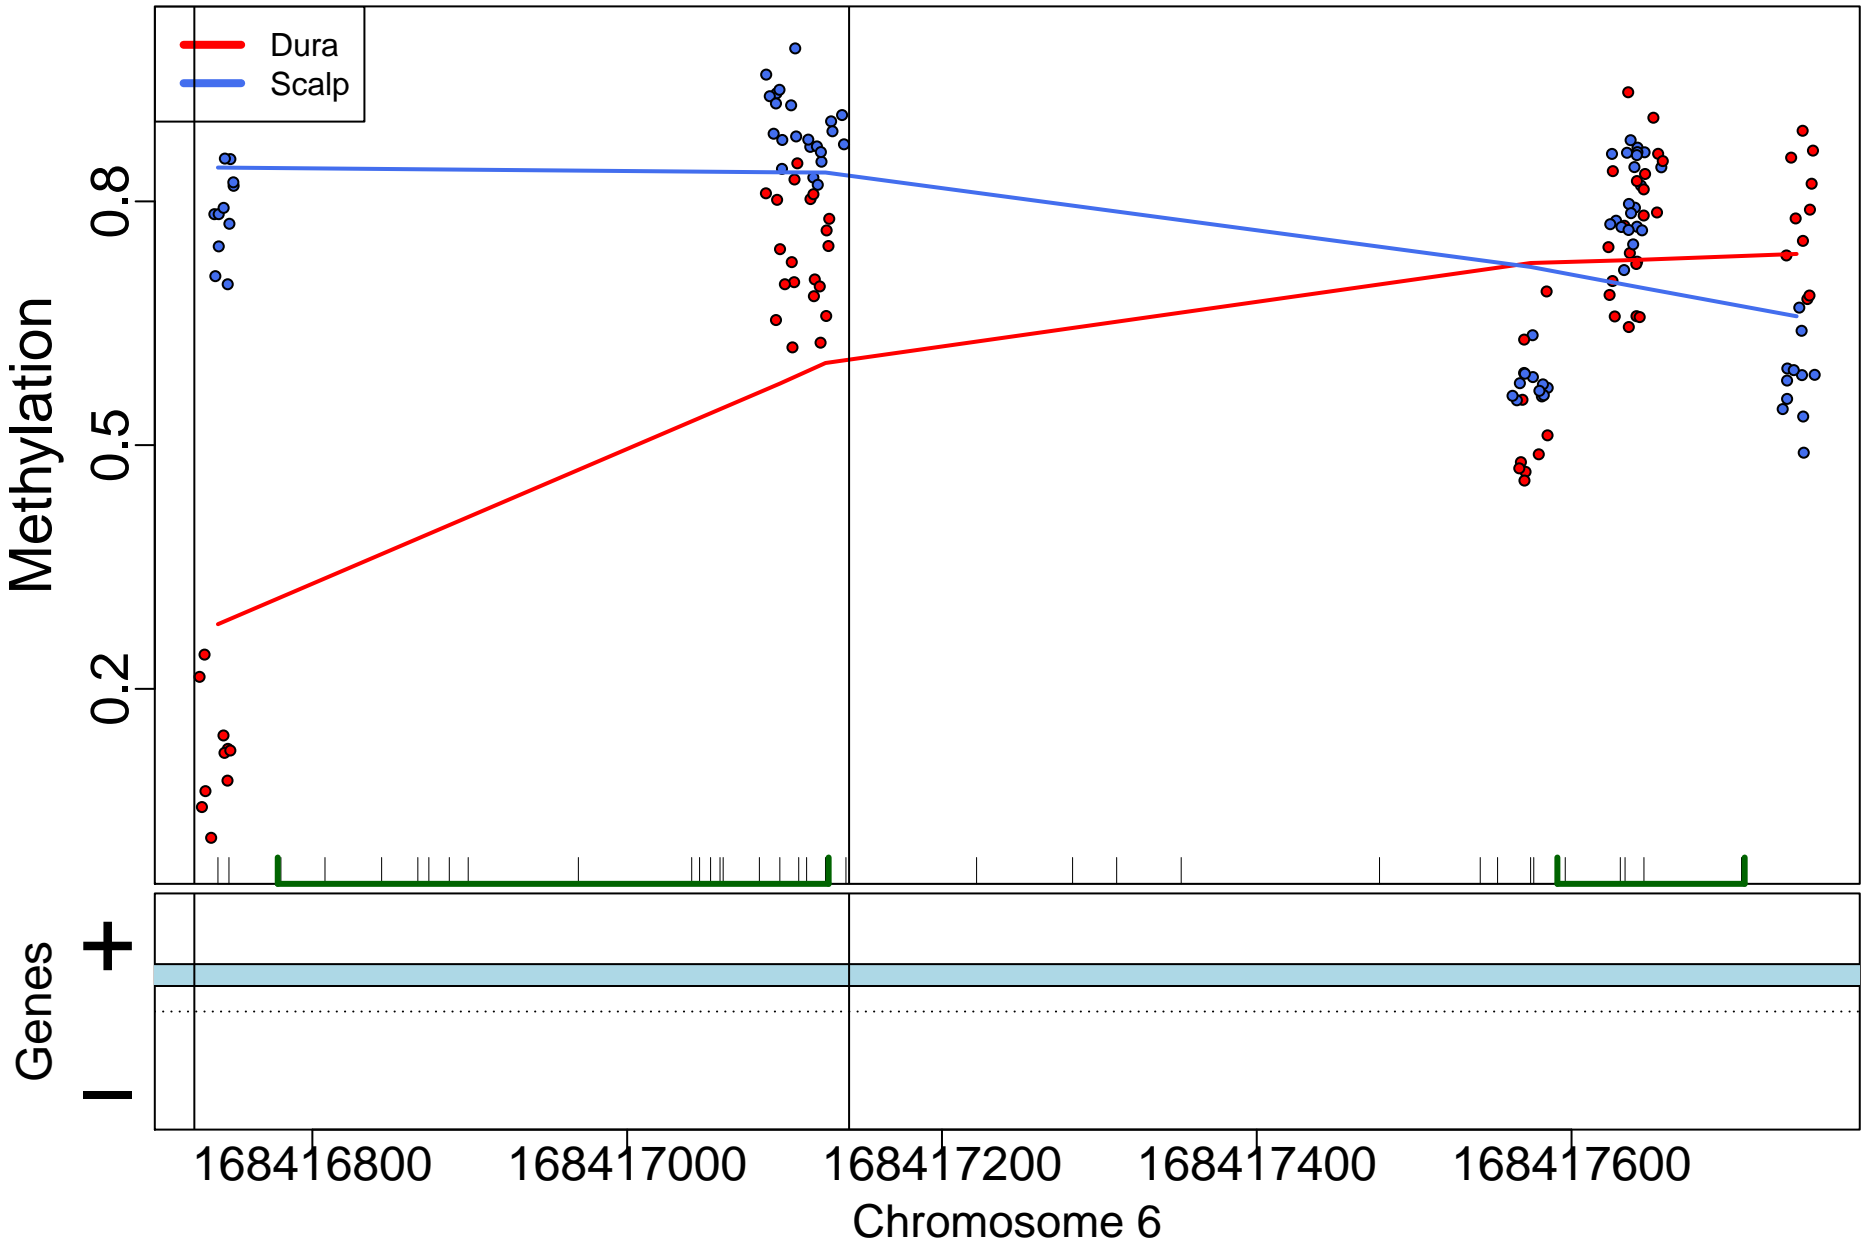

WDR37; 0bp from tss:NA

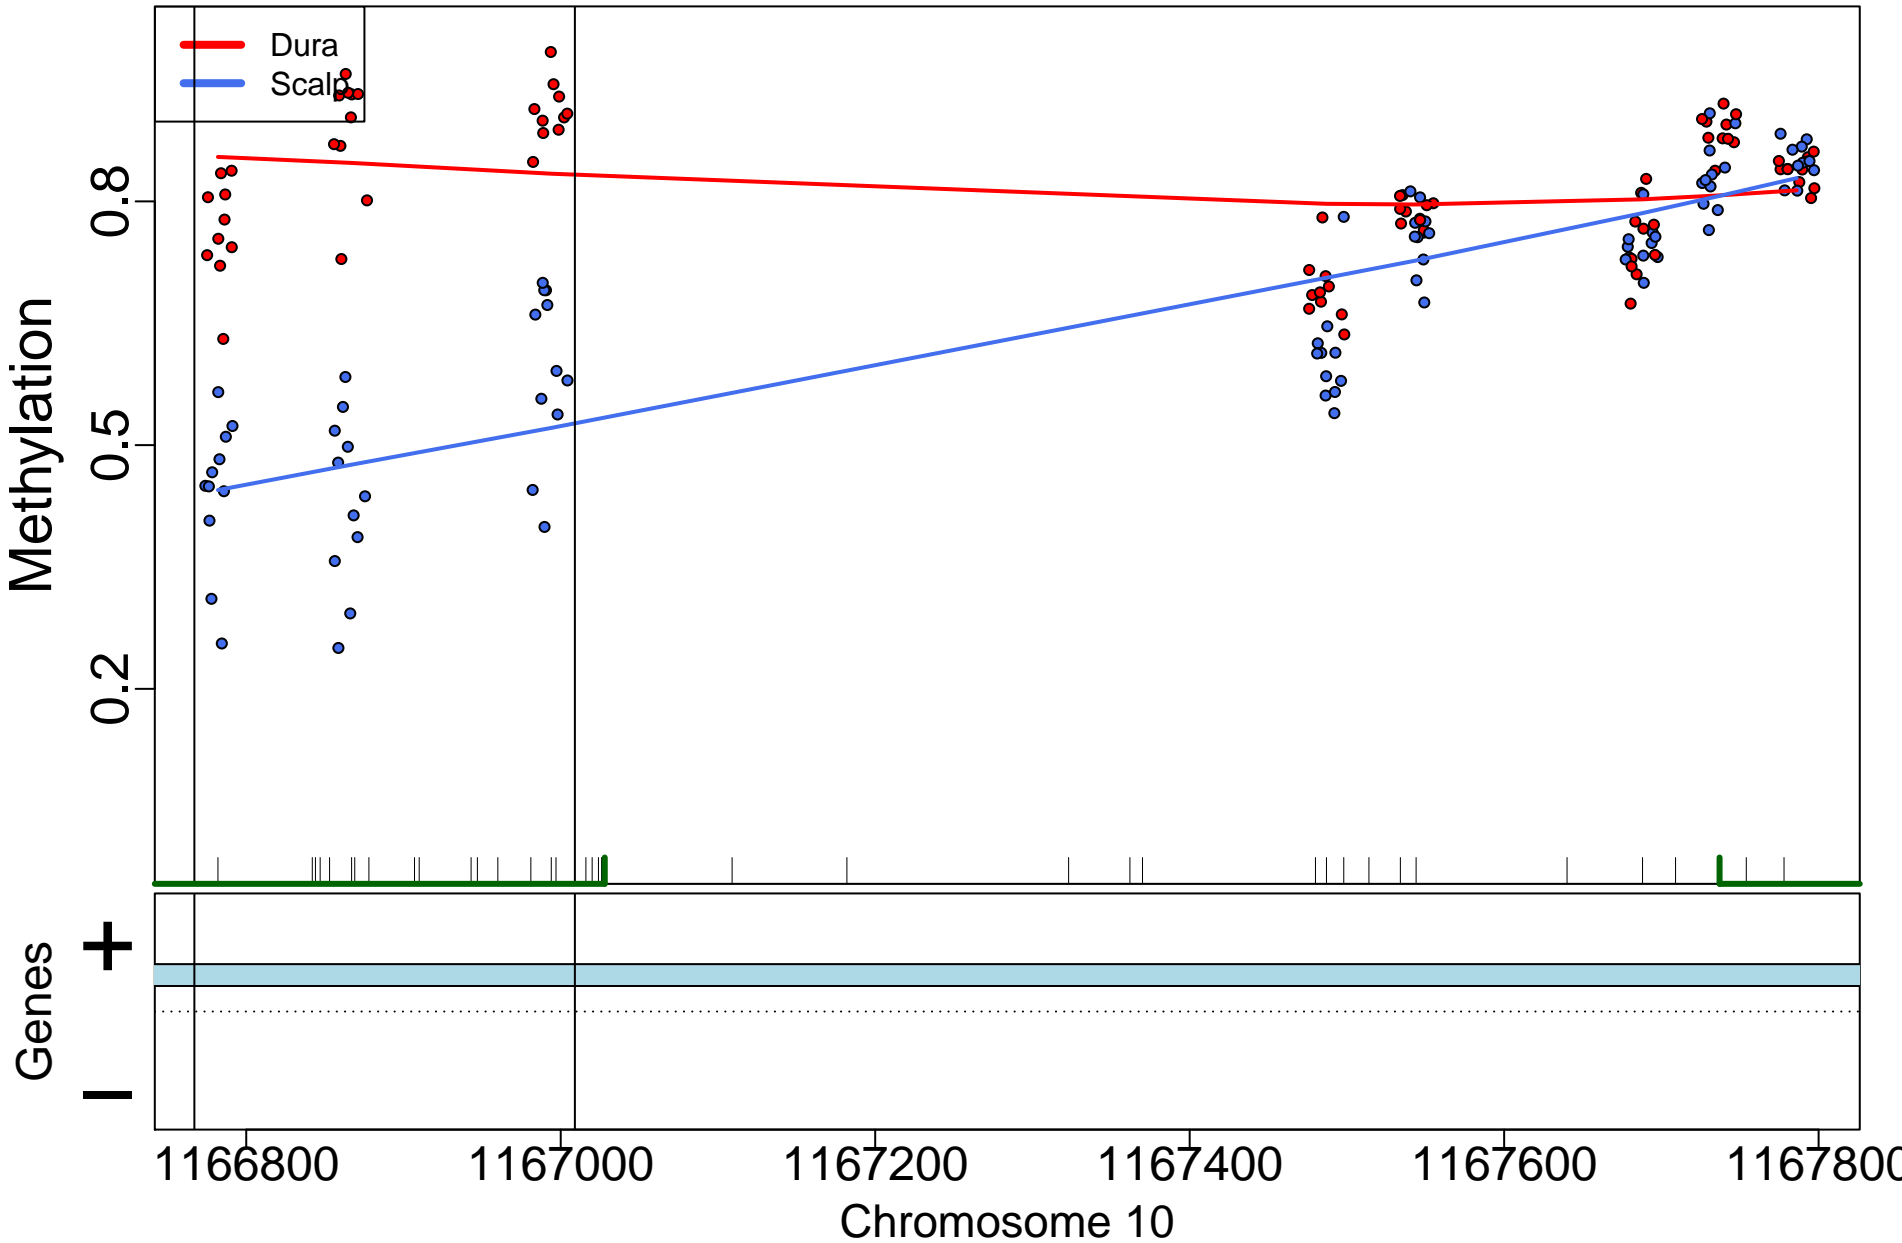



ADCY9; 152849bp from tss:inside exon

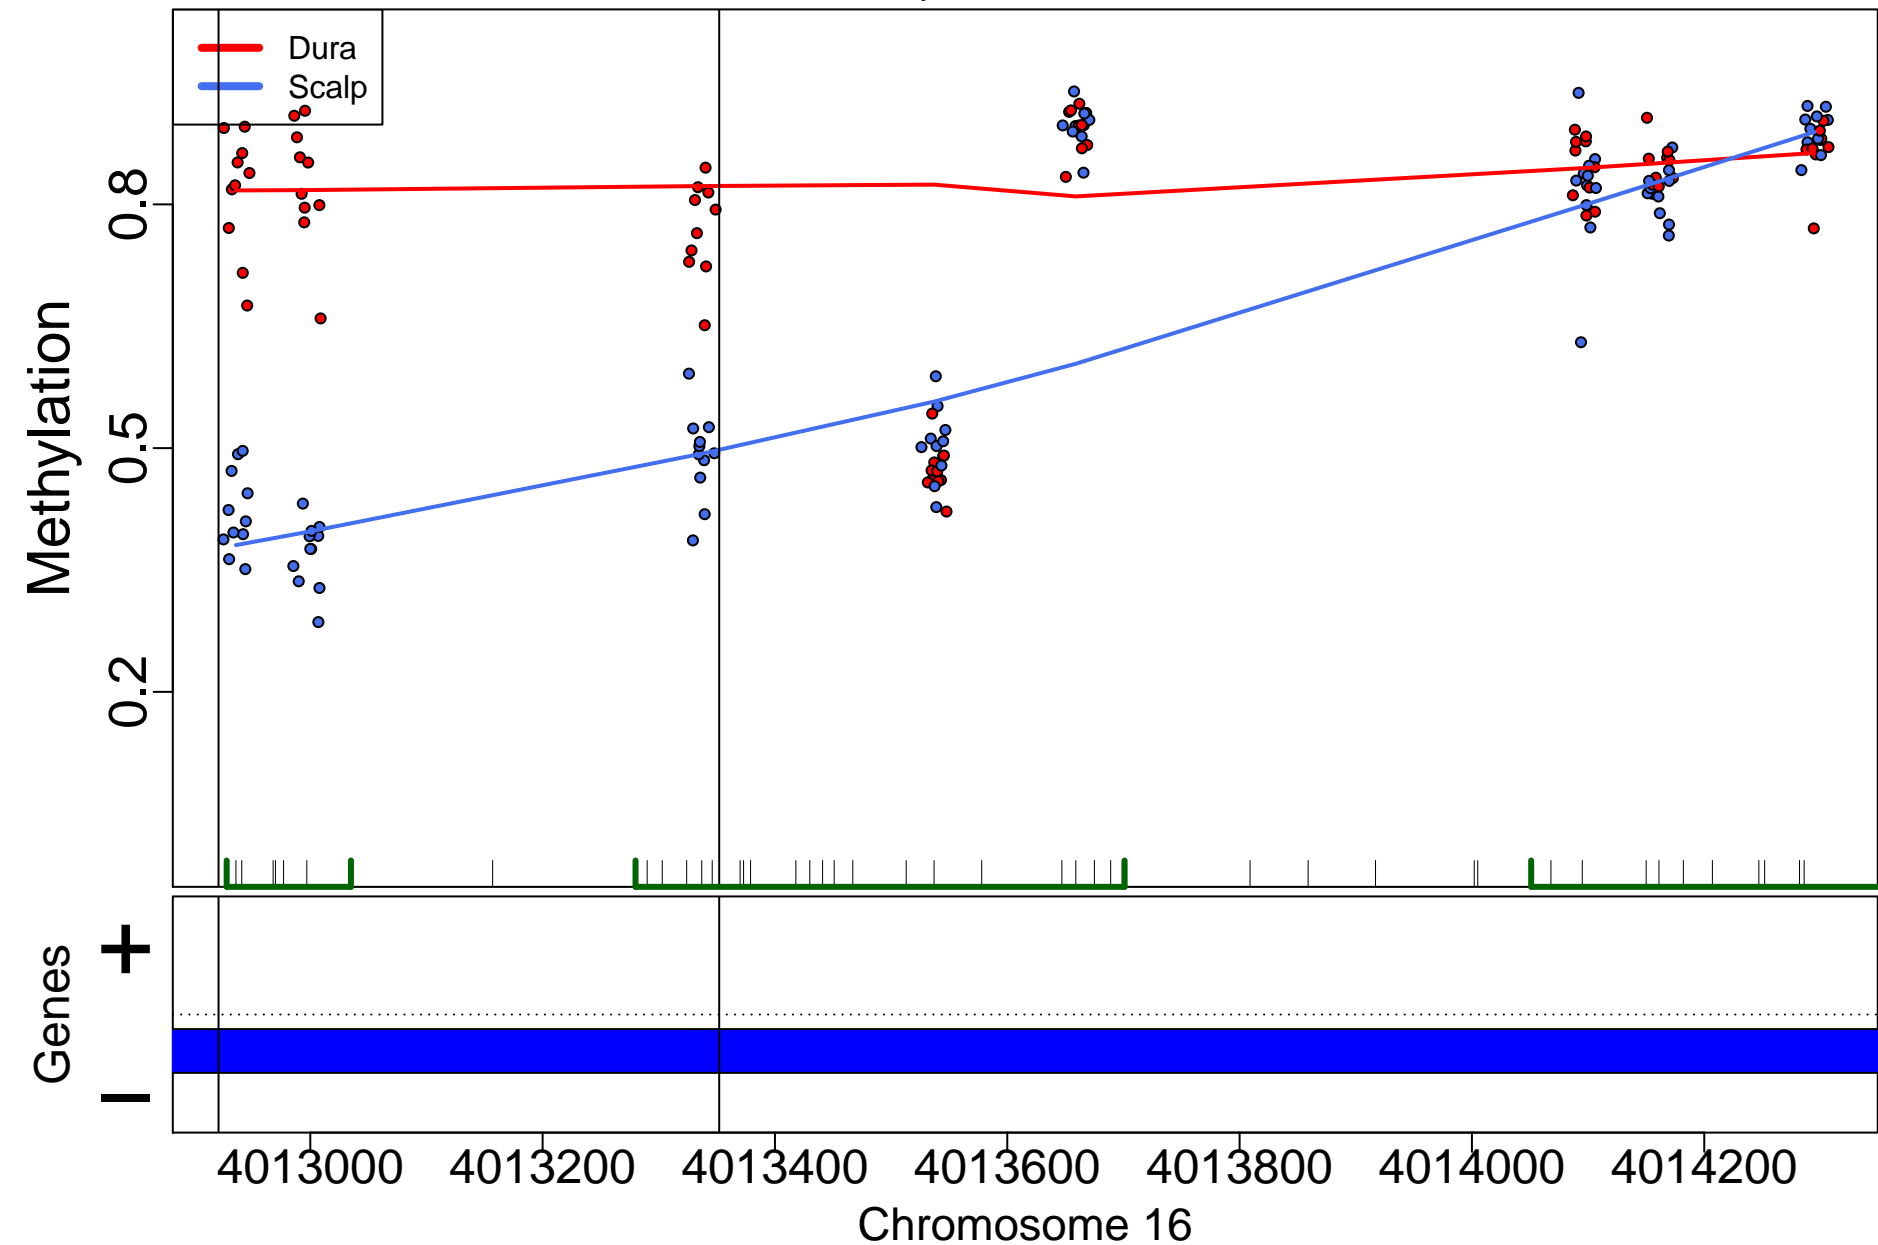

TXNRD1; 52bp from tss:overlaps exon downstream

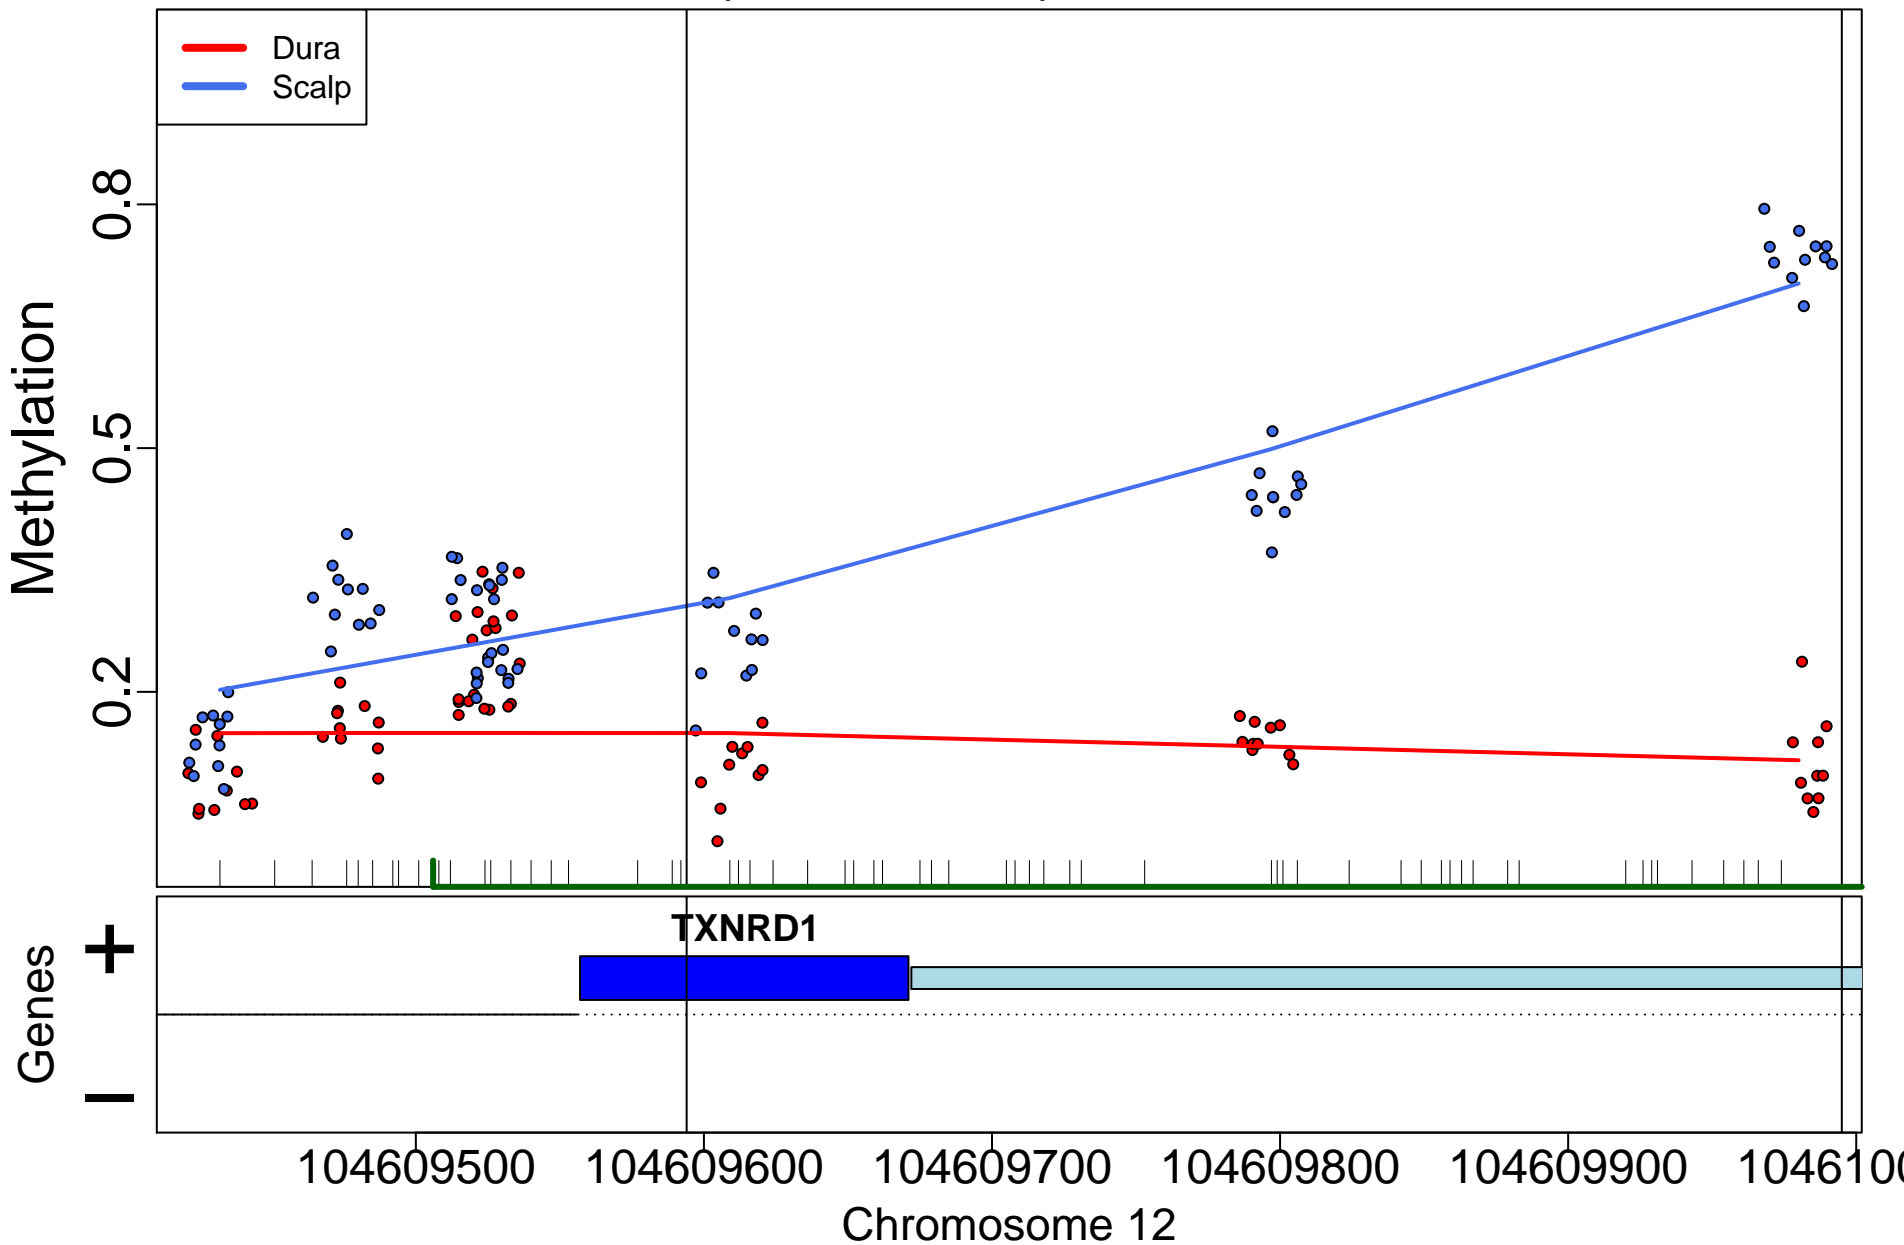

PRDM16; 162615bp from tss:inside intron

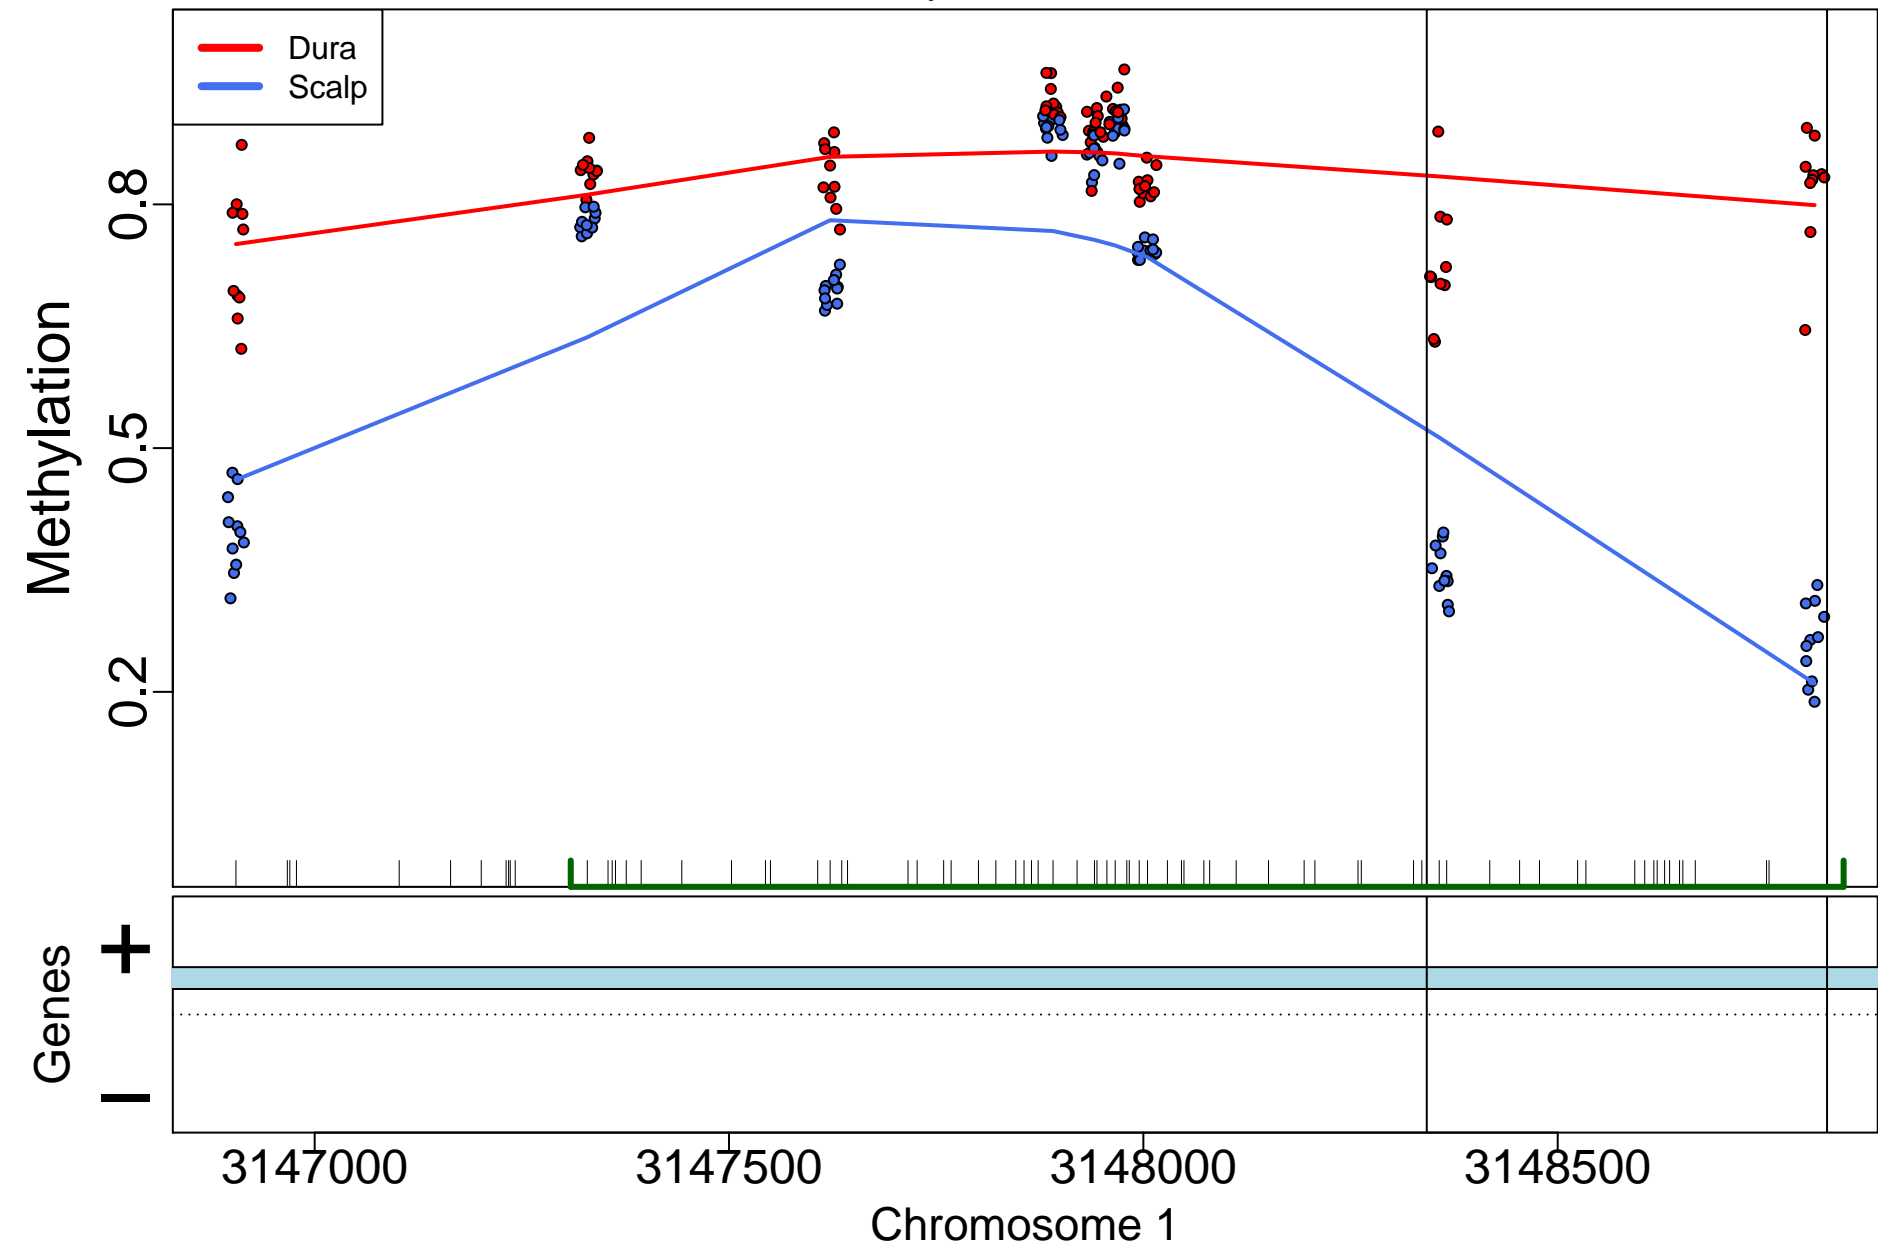

CATSPER1; 1207bp from tss:inside exon

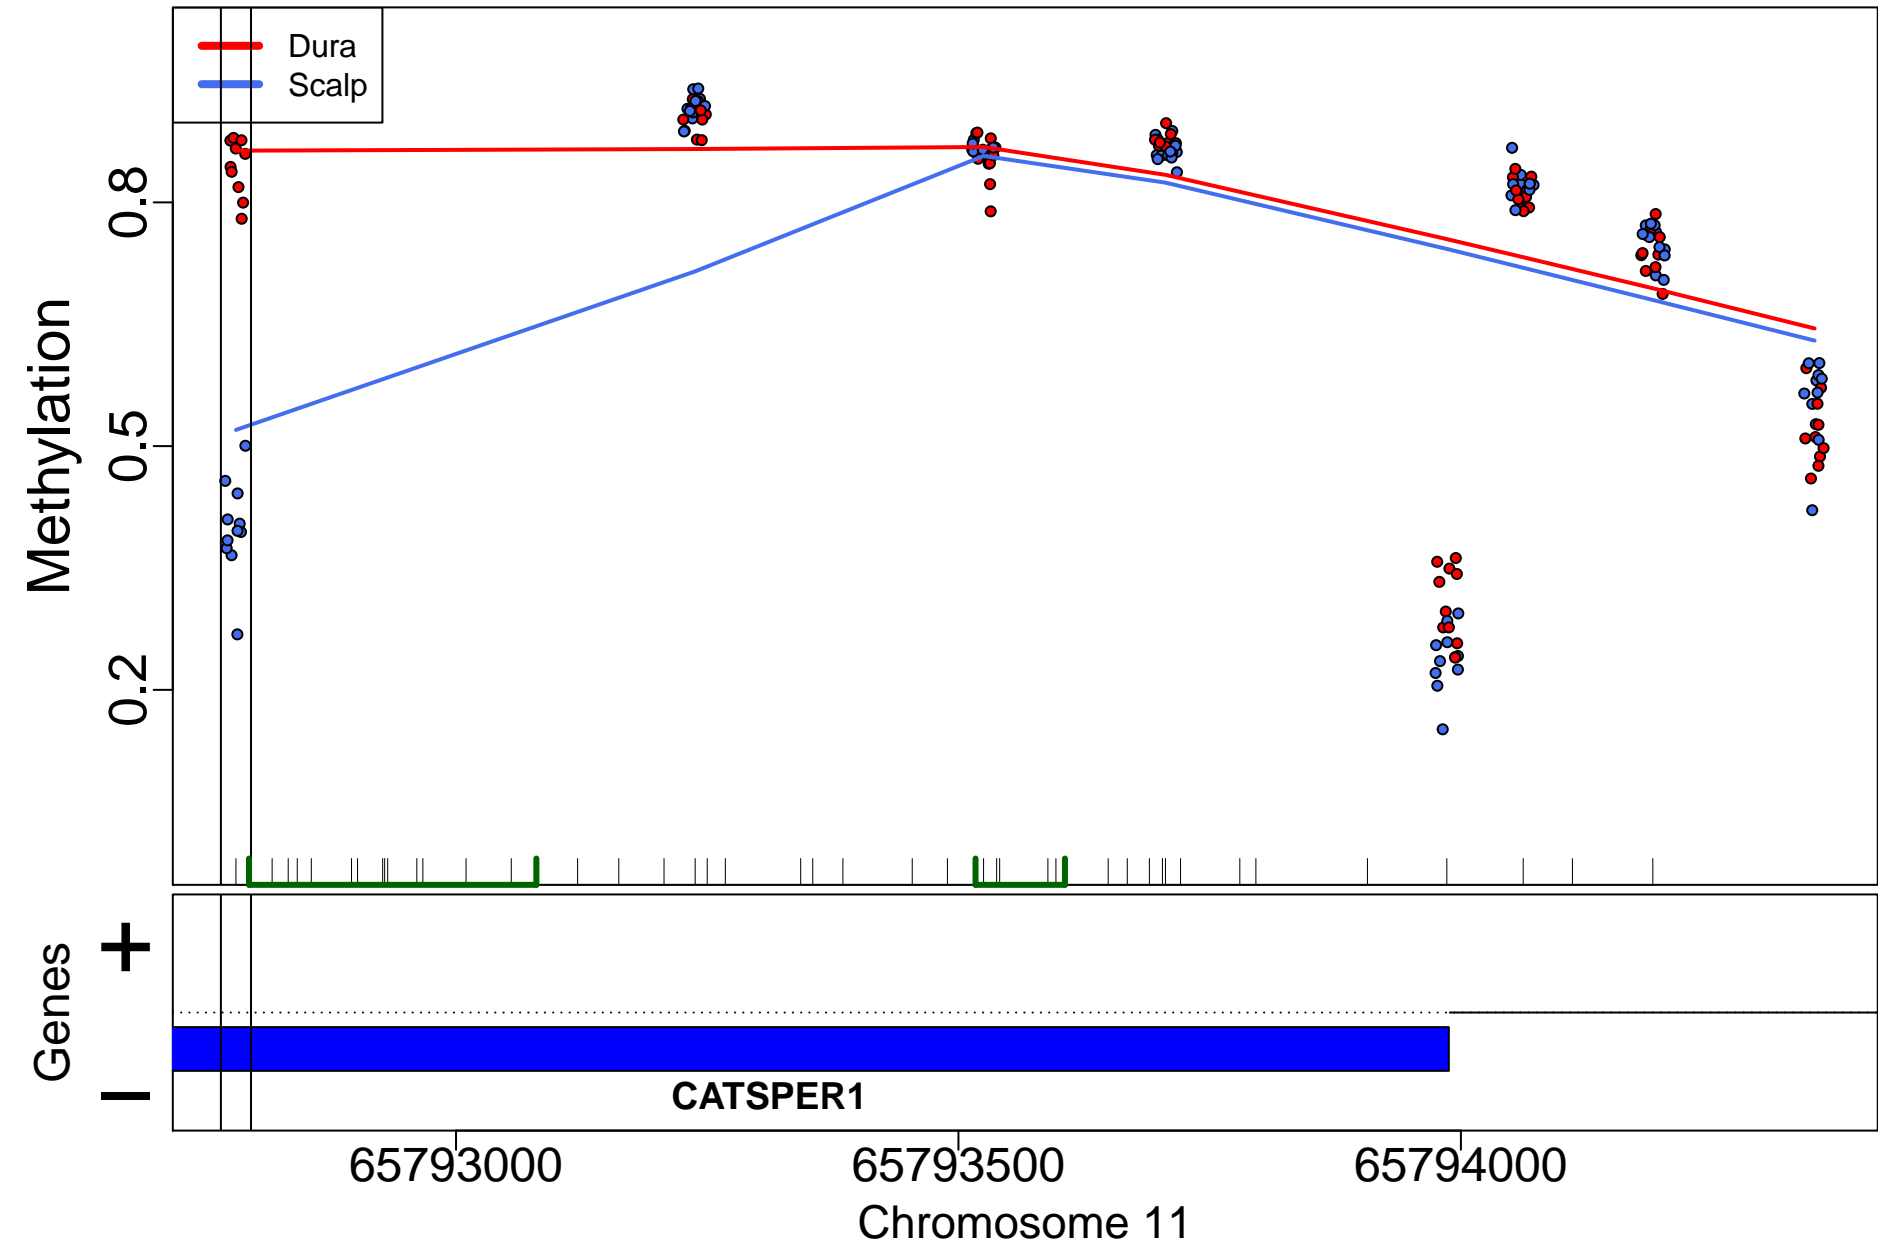

MACF1; 76841bp from tss:inside intron

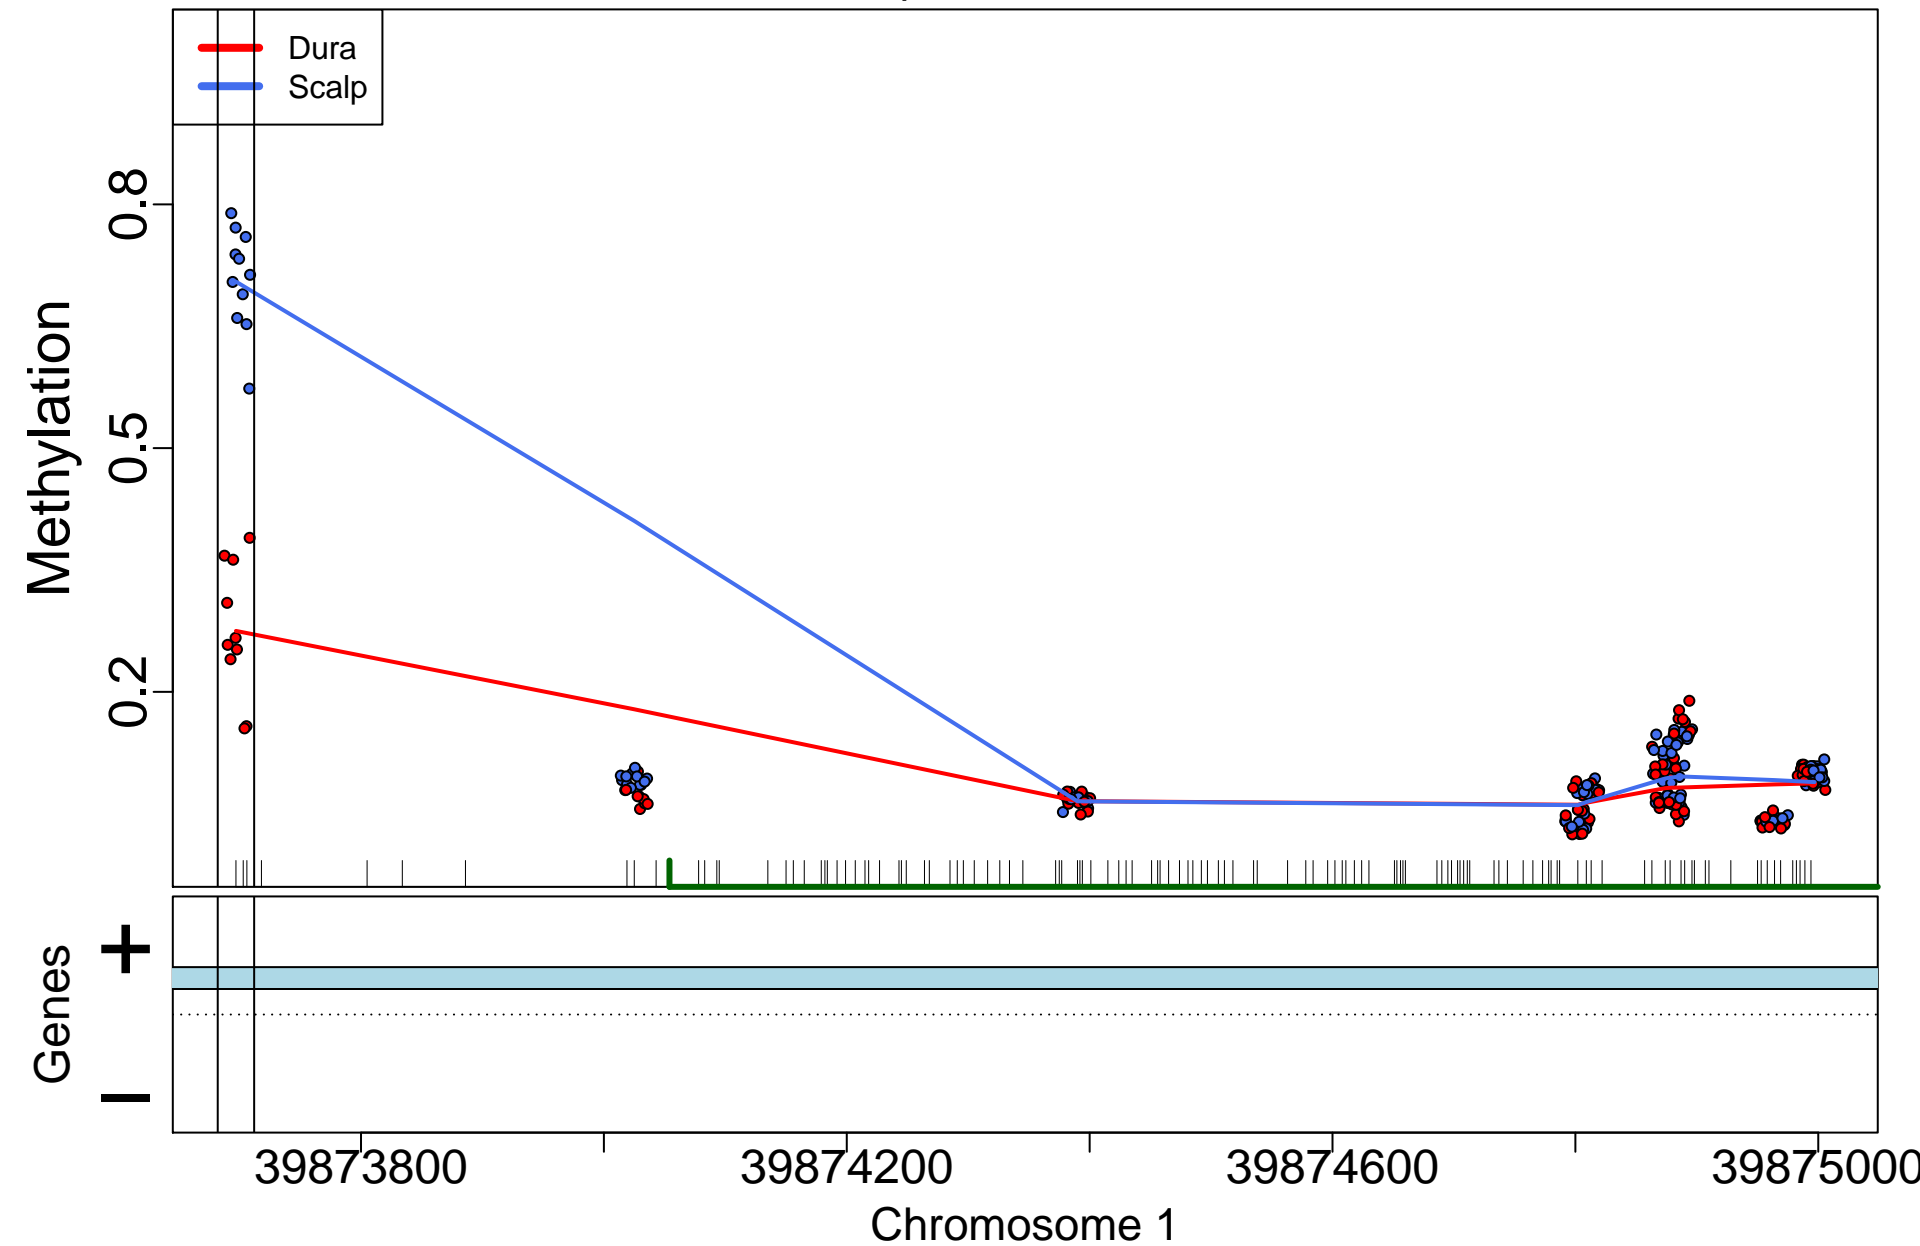

POMGNT1; 21040bp from tss:inside intron

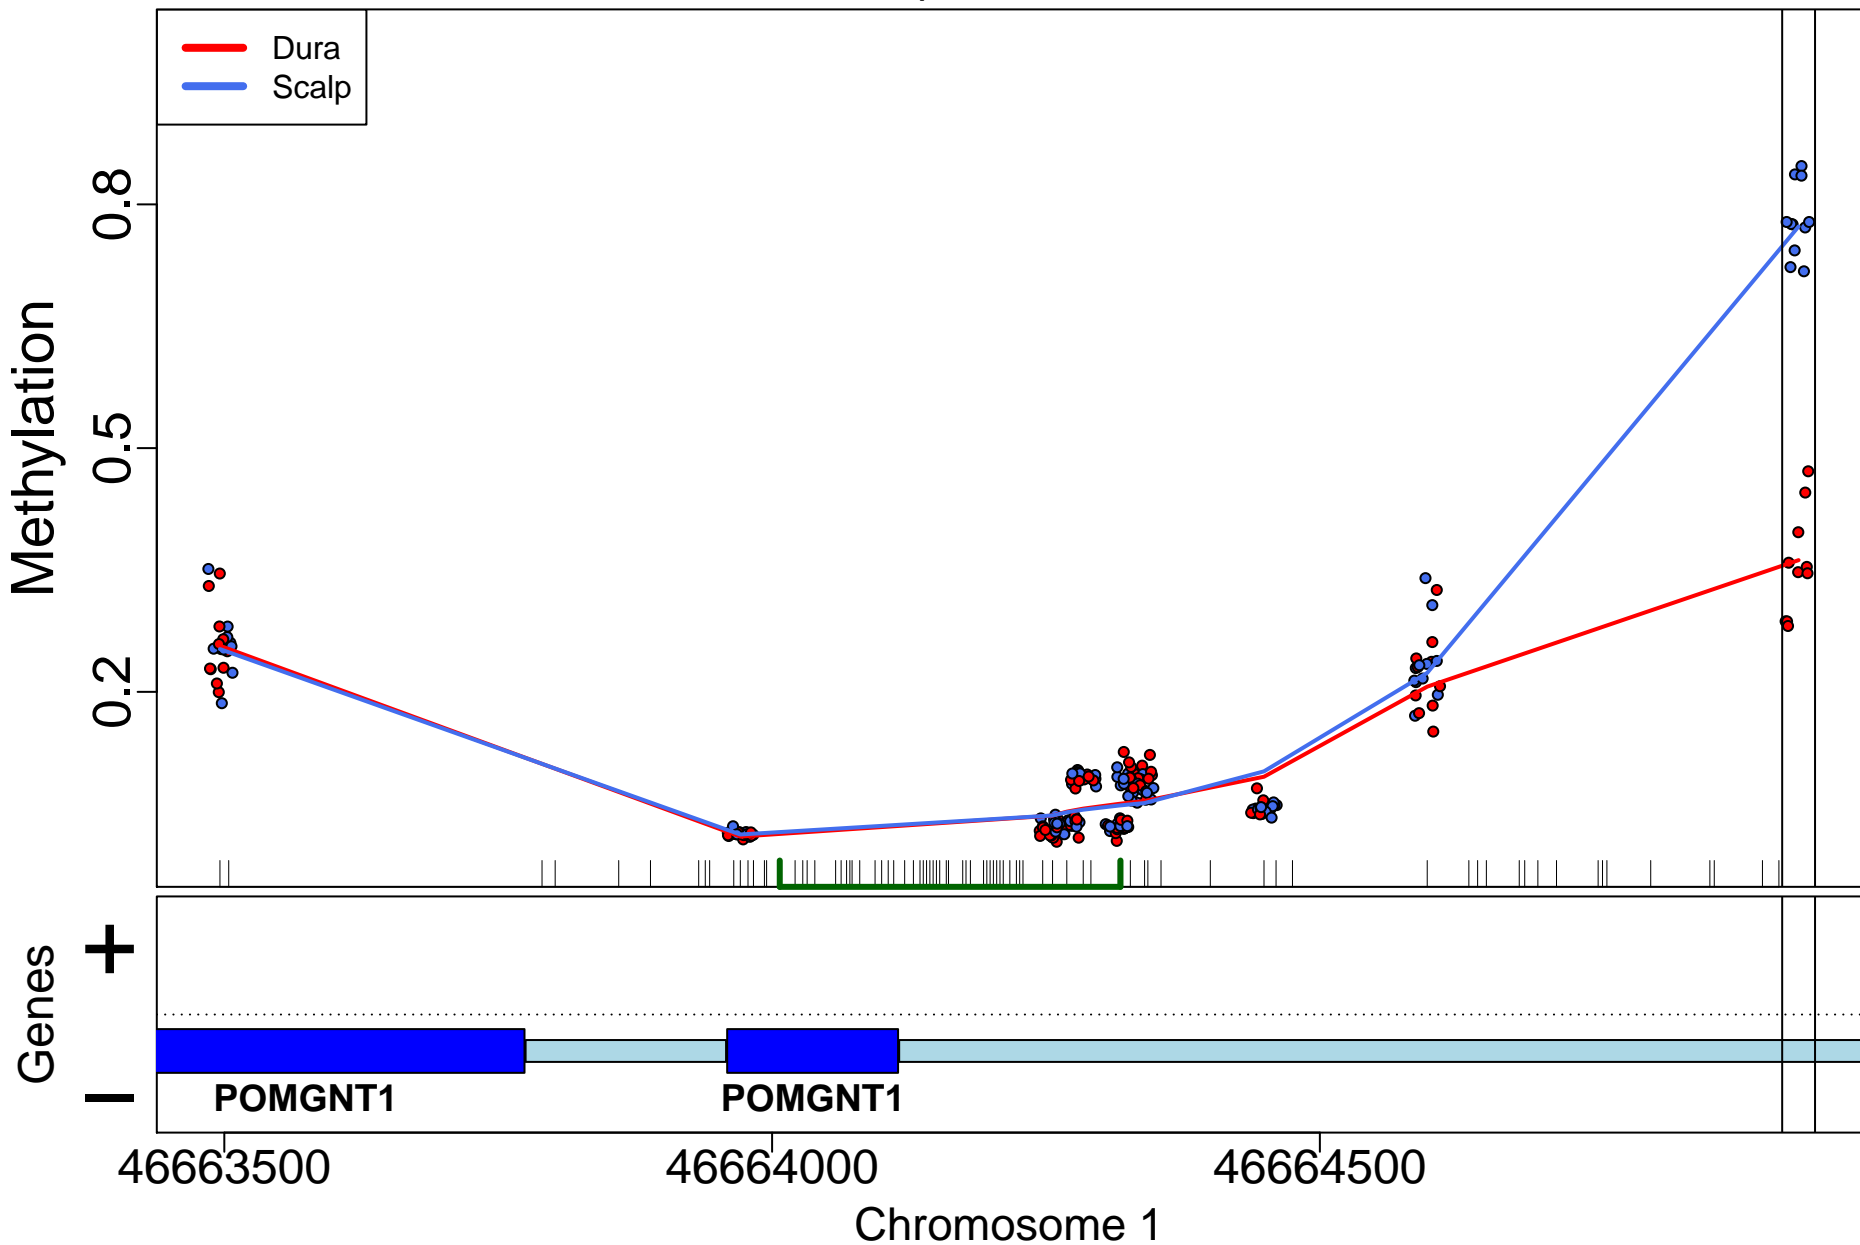

## SOX2-OT; 0bp from tss:NA

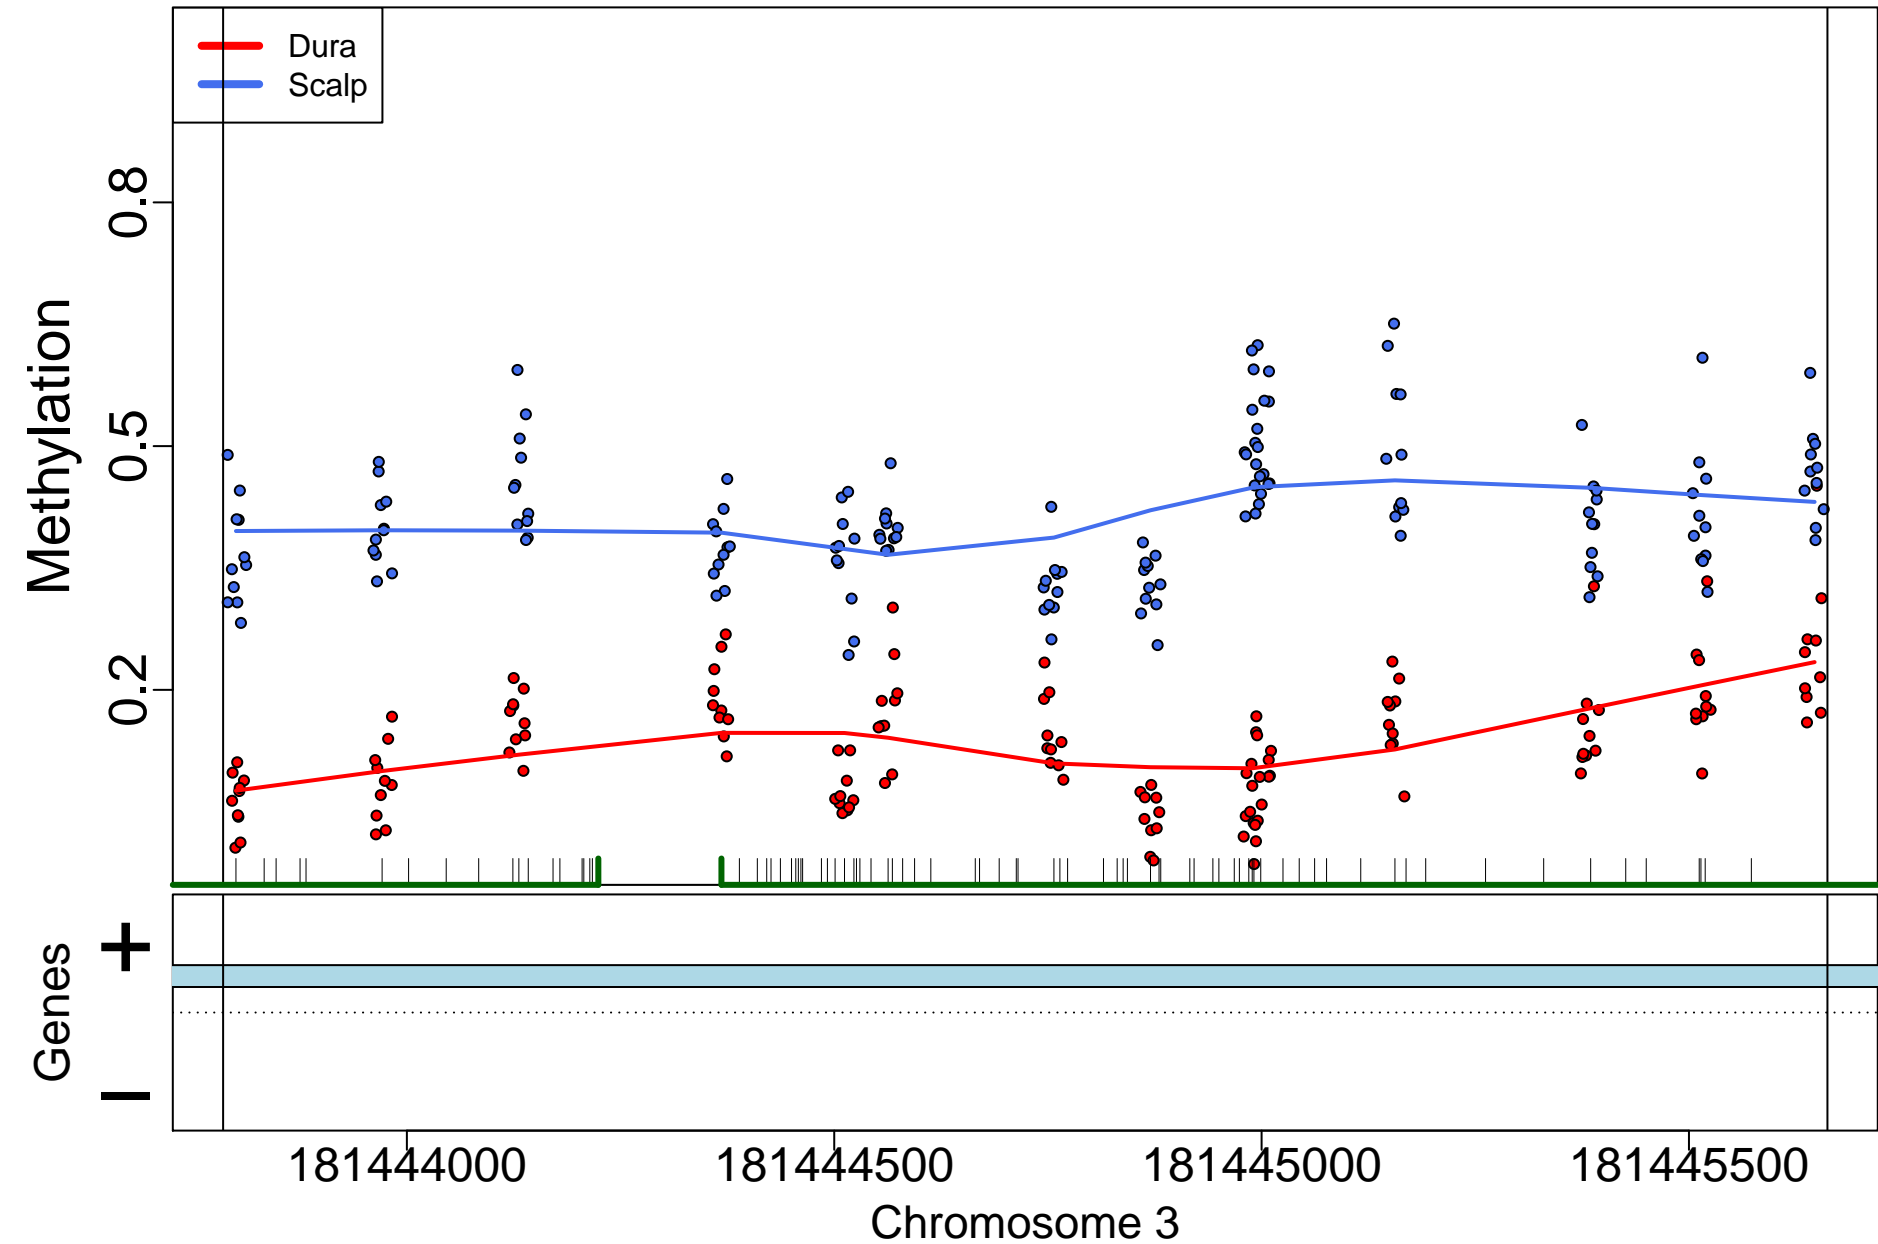

# SIX1; 2596bp from tss:upstream

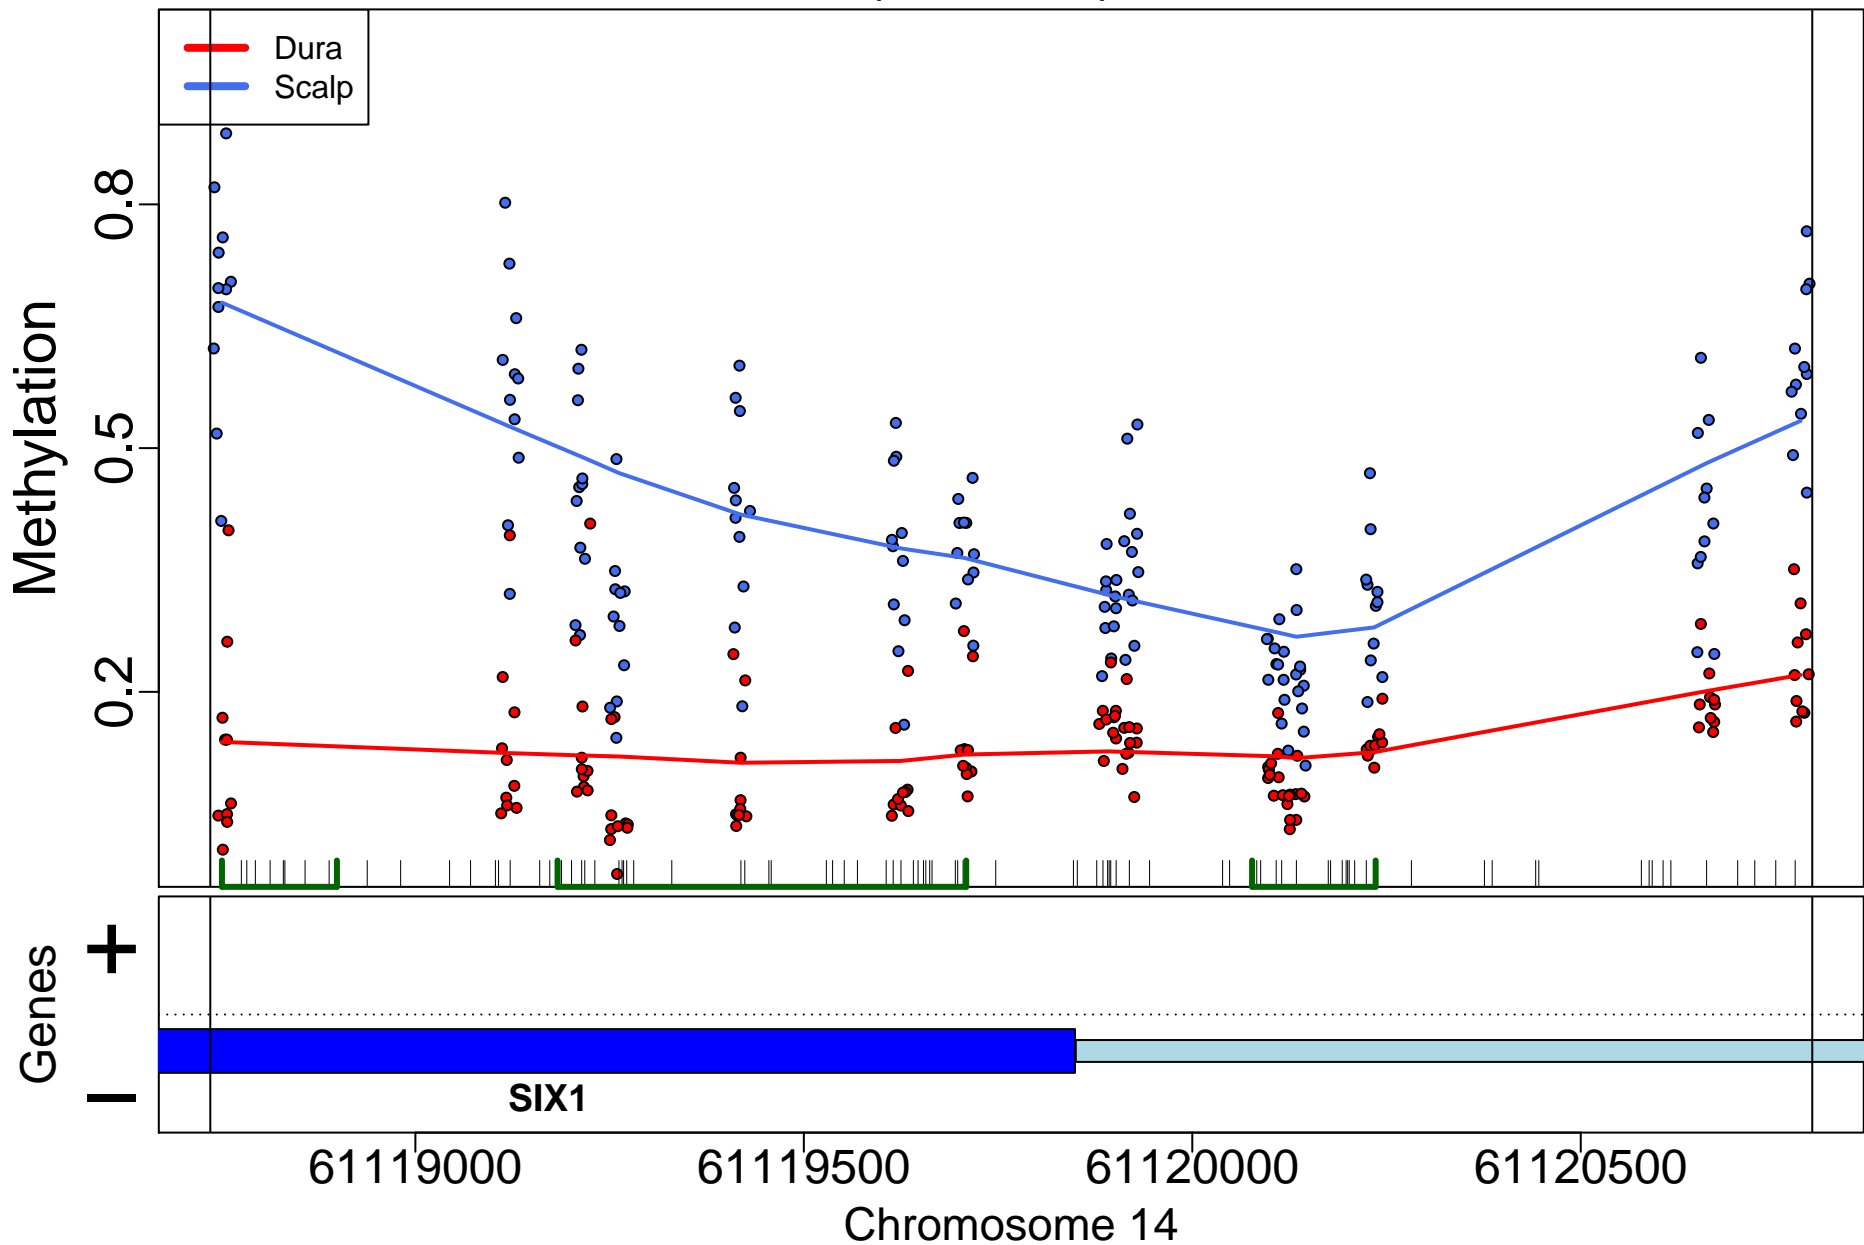



HOXC4; 35377bp from tss:covers exon(s)

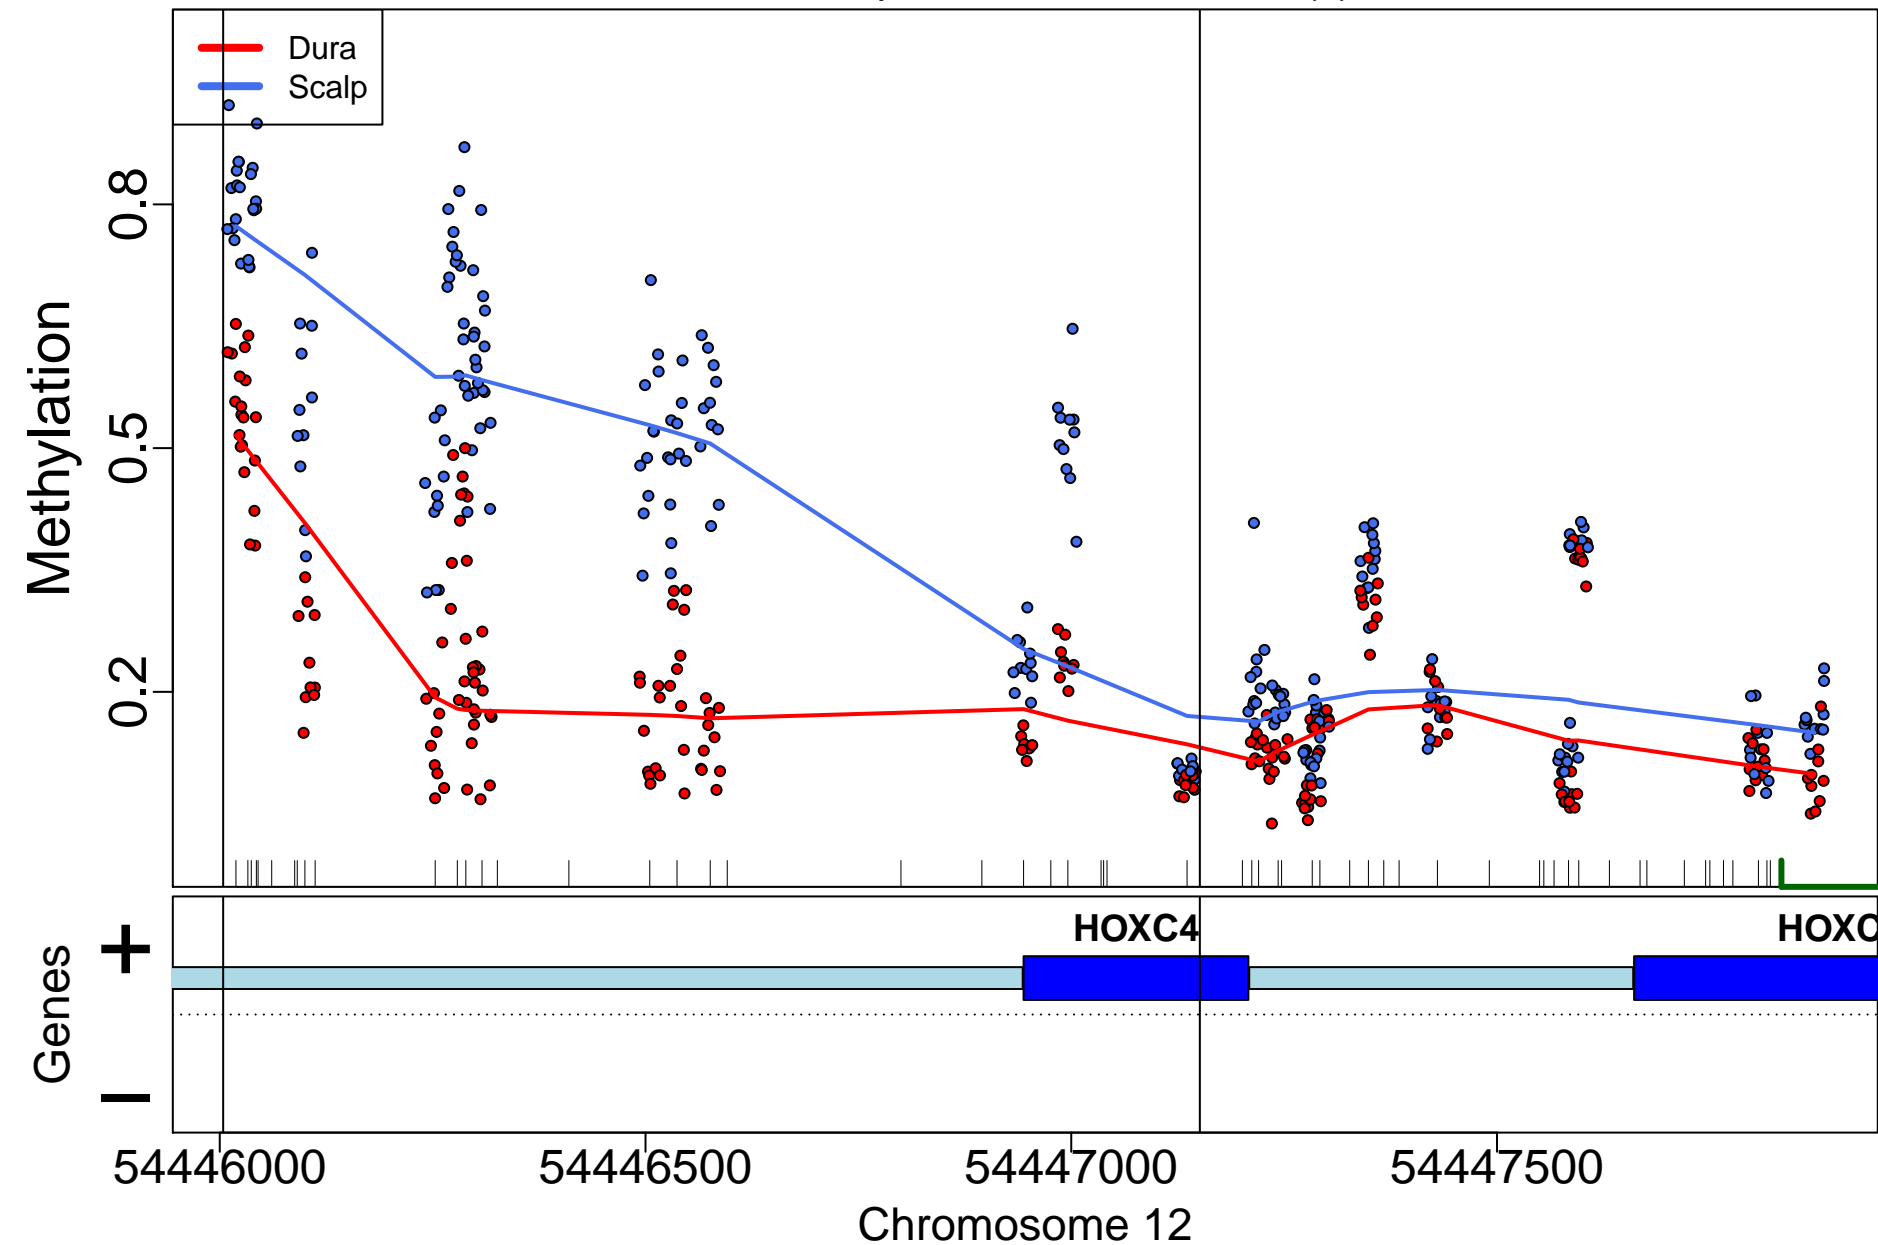

FOXK1; 39863bp from tss:inside intron

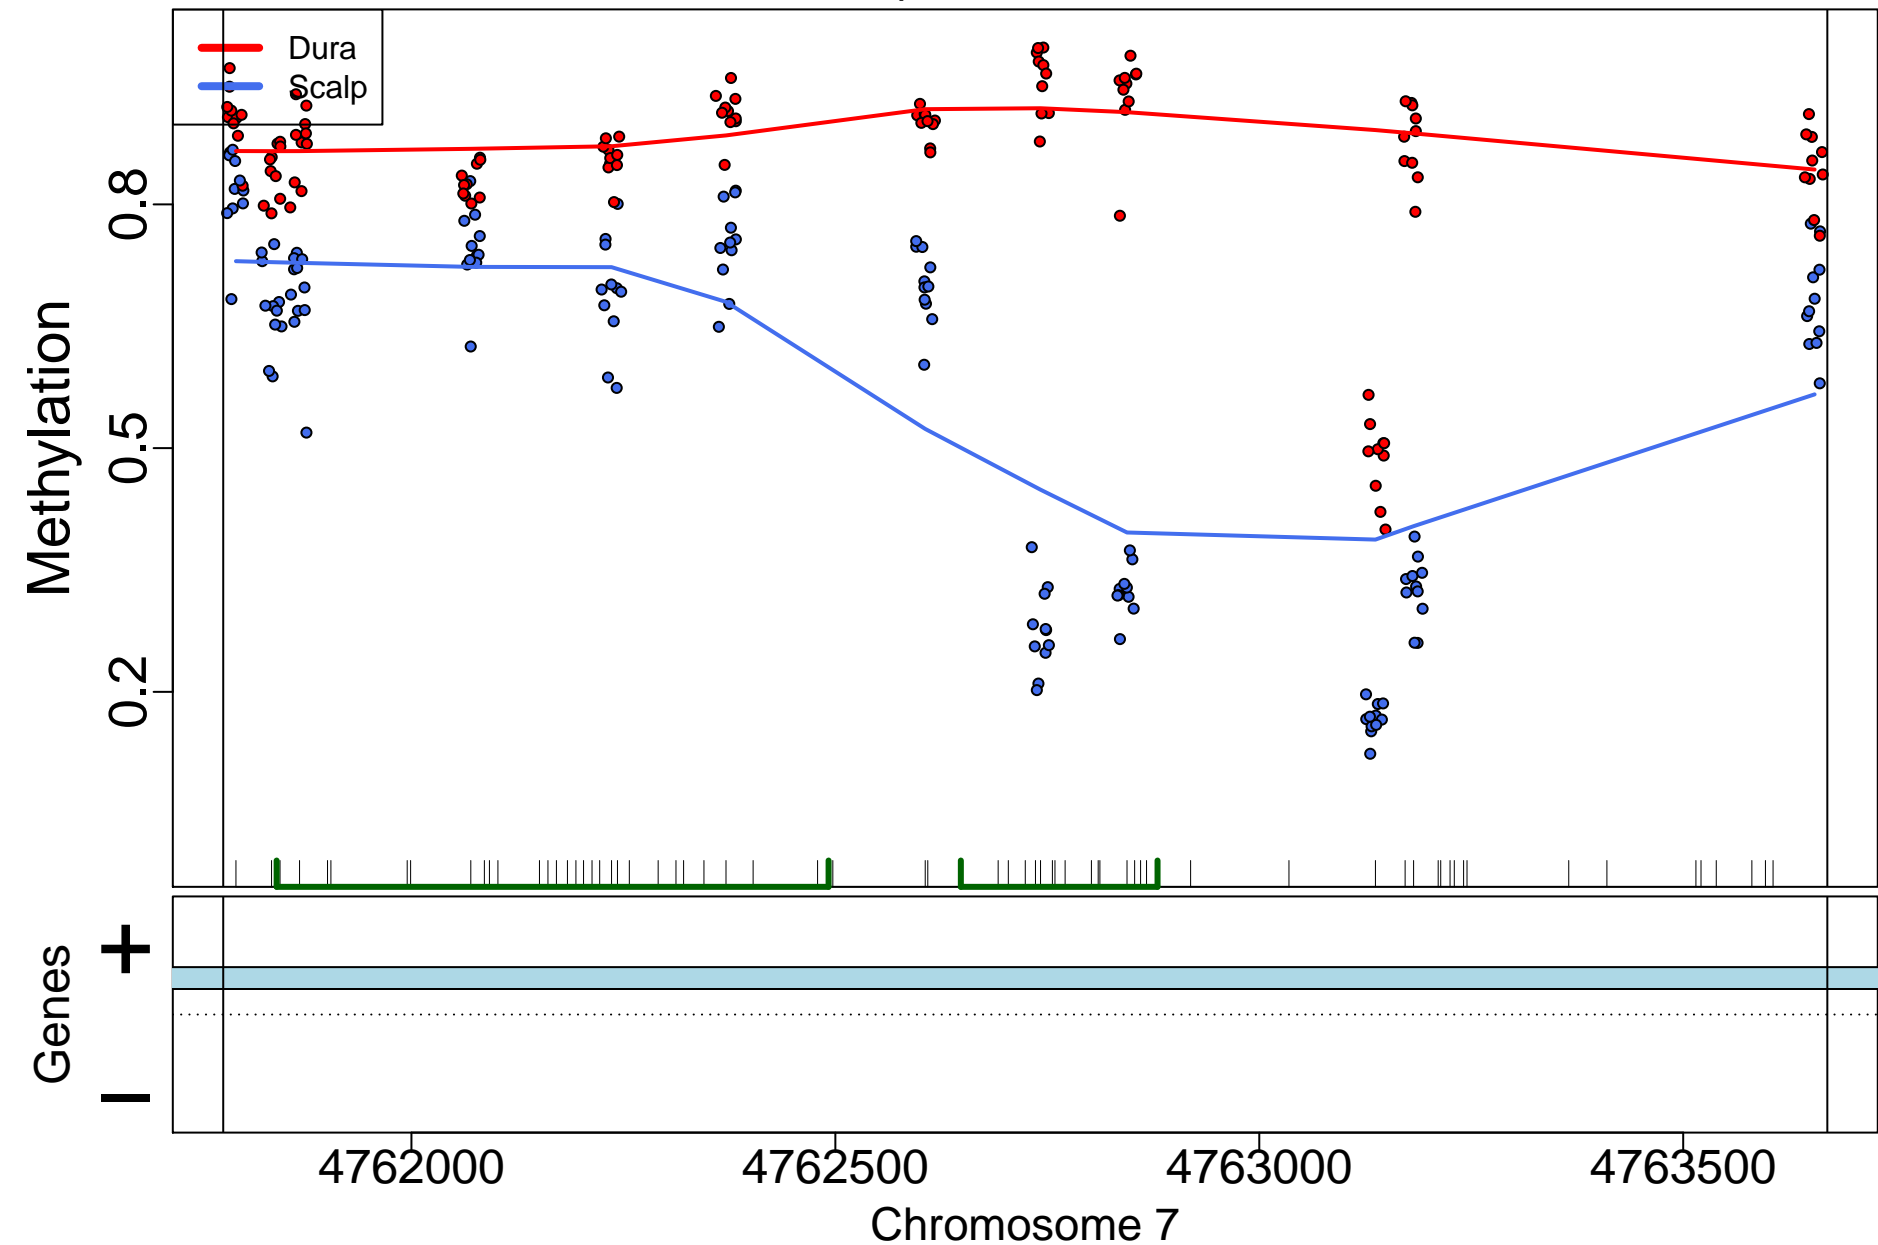

EYA1; 194963bp from tss:upstream

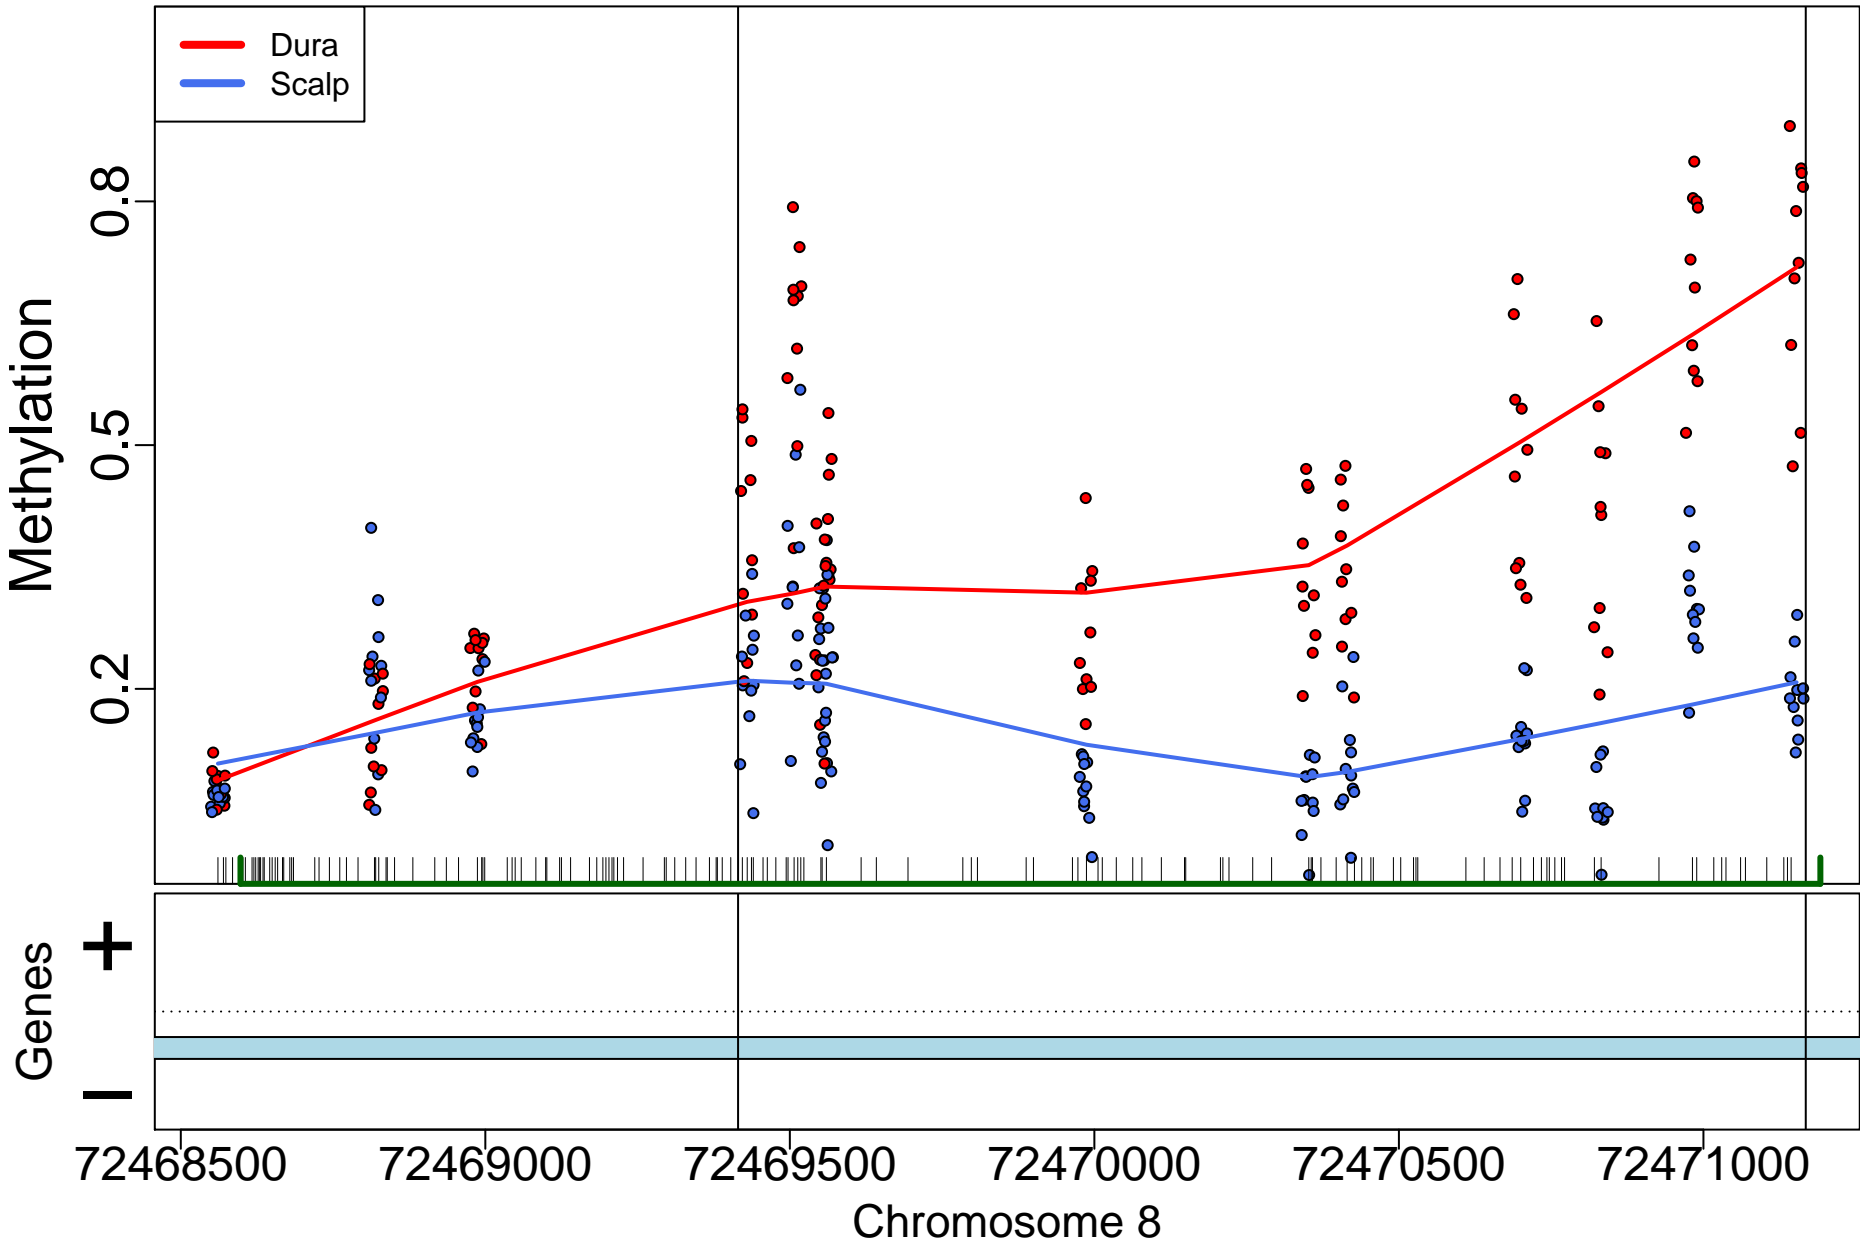

MGC45800; 0bp from tss:NA

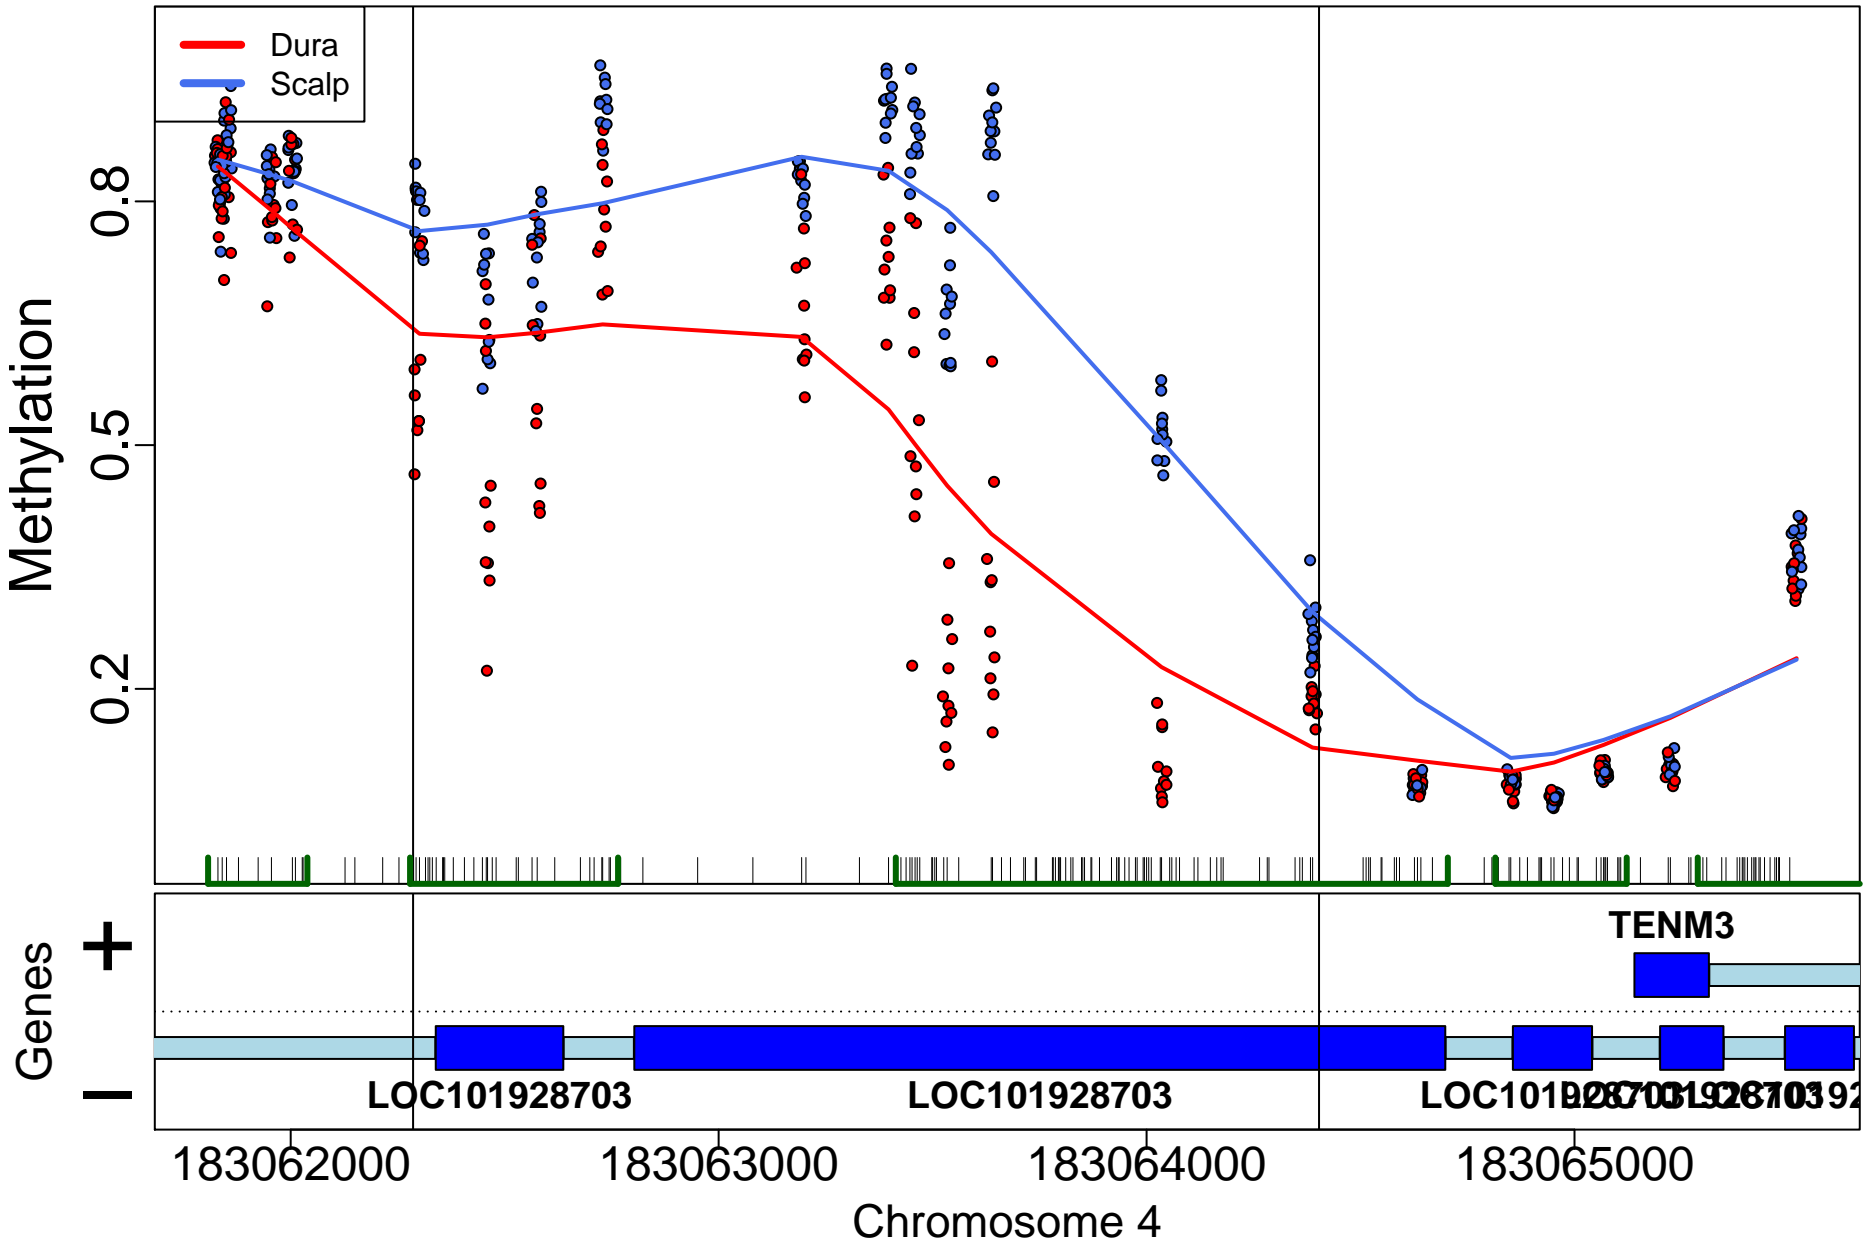

PRDM6; 750bp from tss:promoter

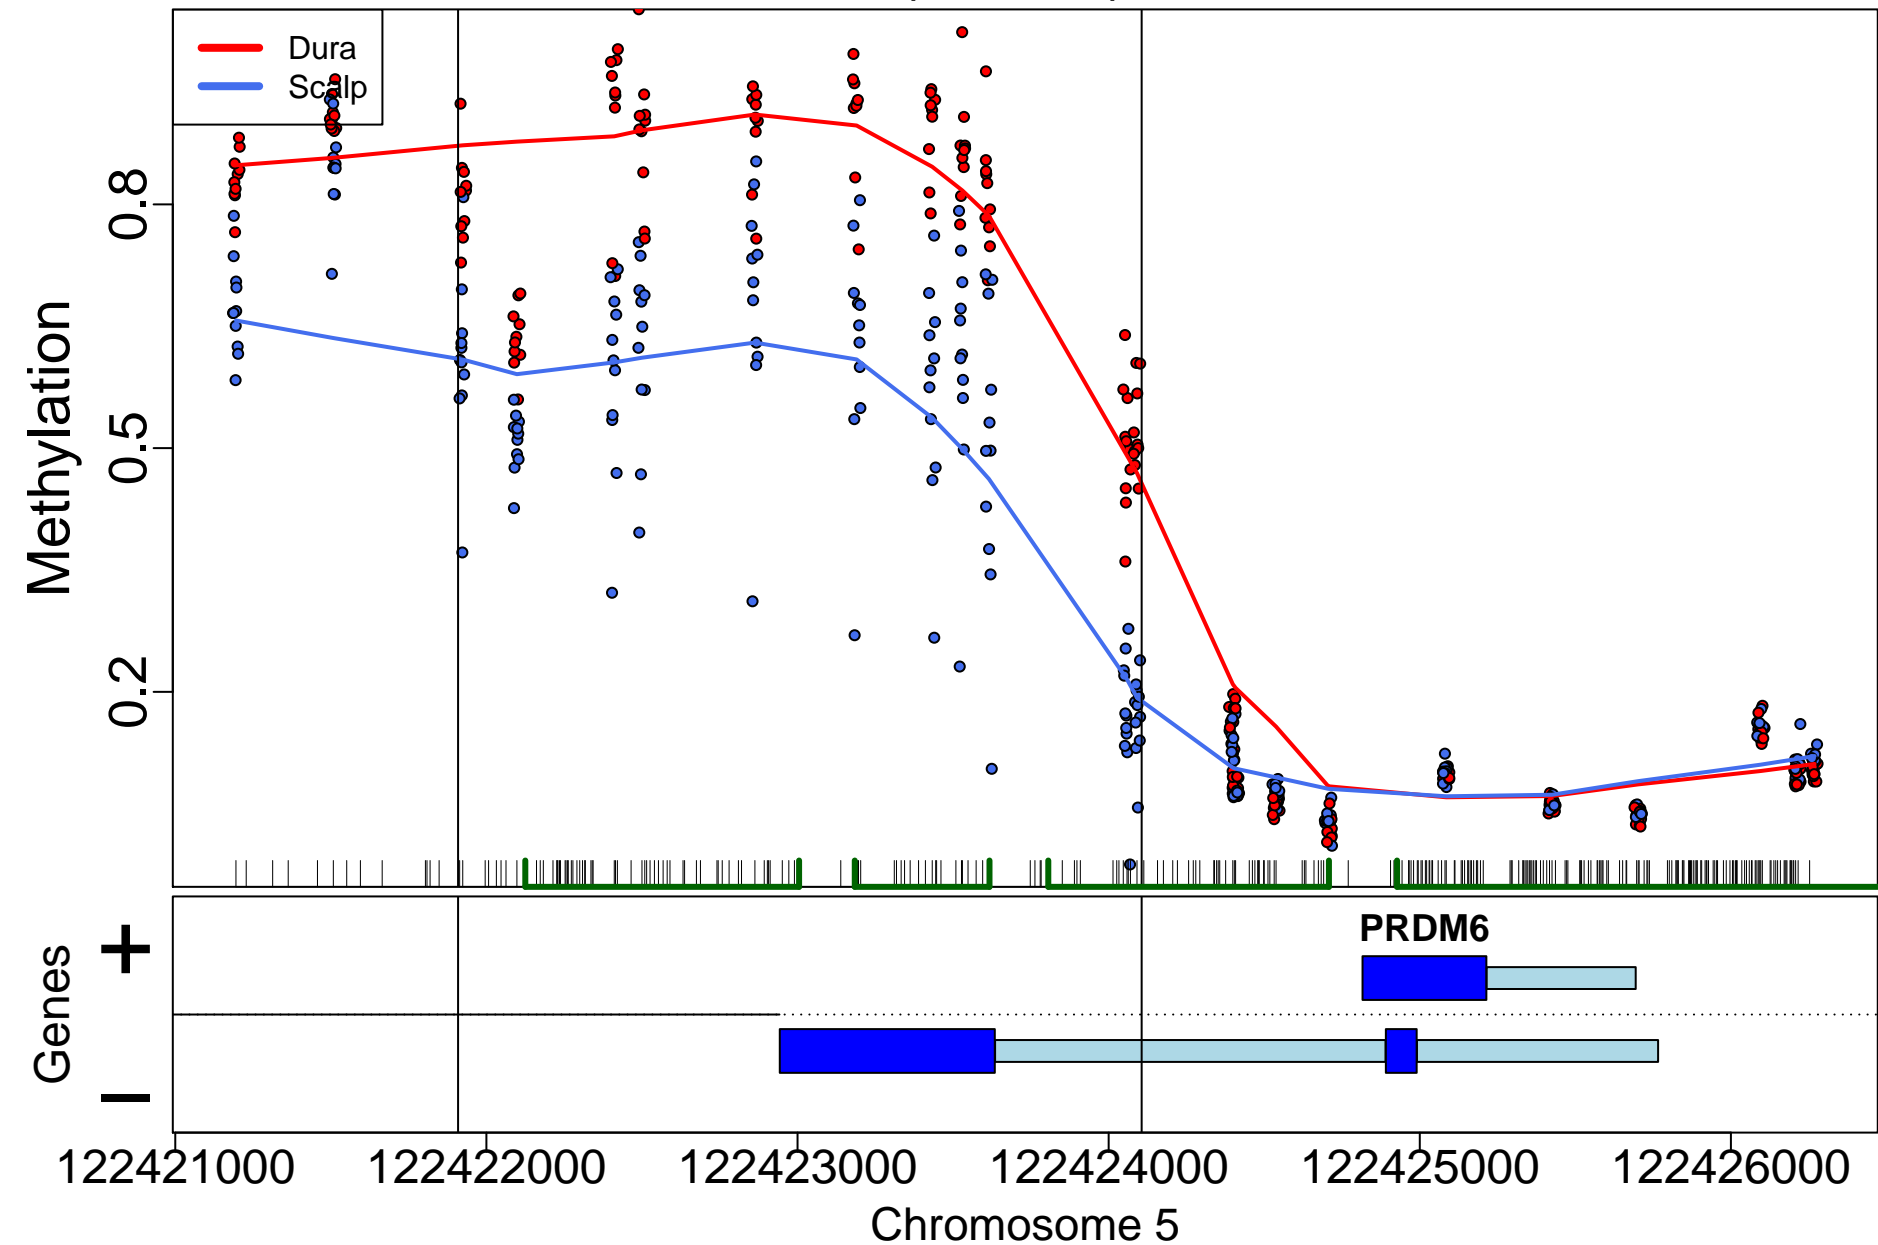

NR2F2; 0bp from tss:overlaps 5'

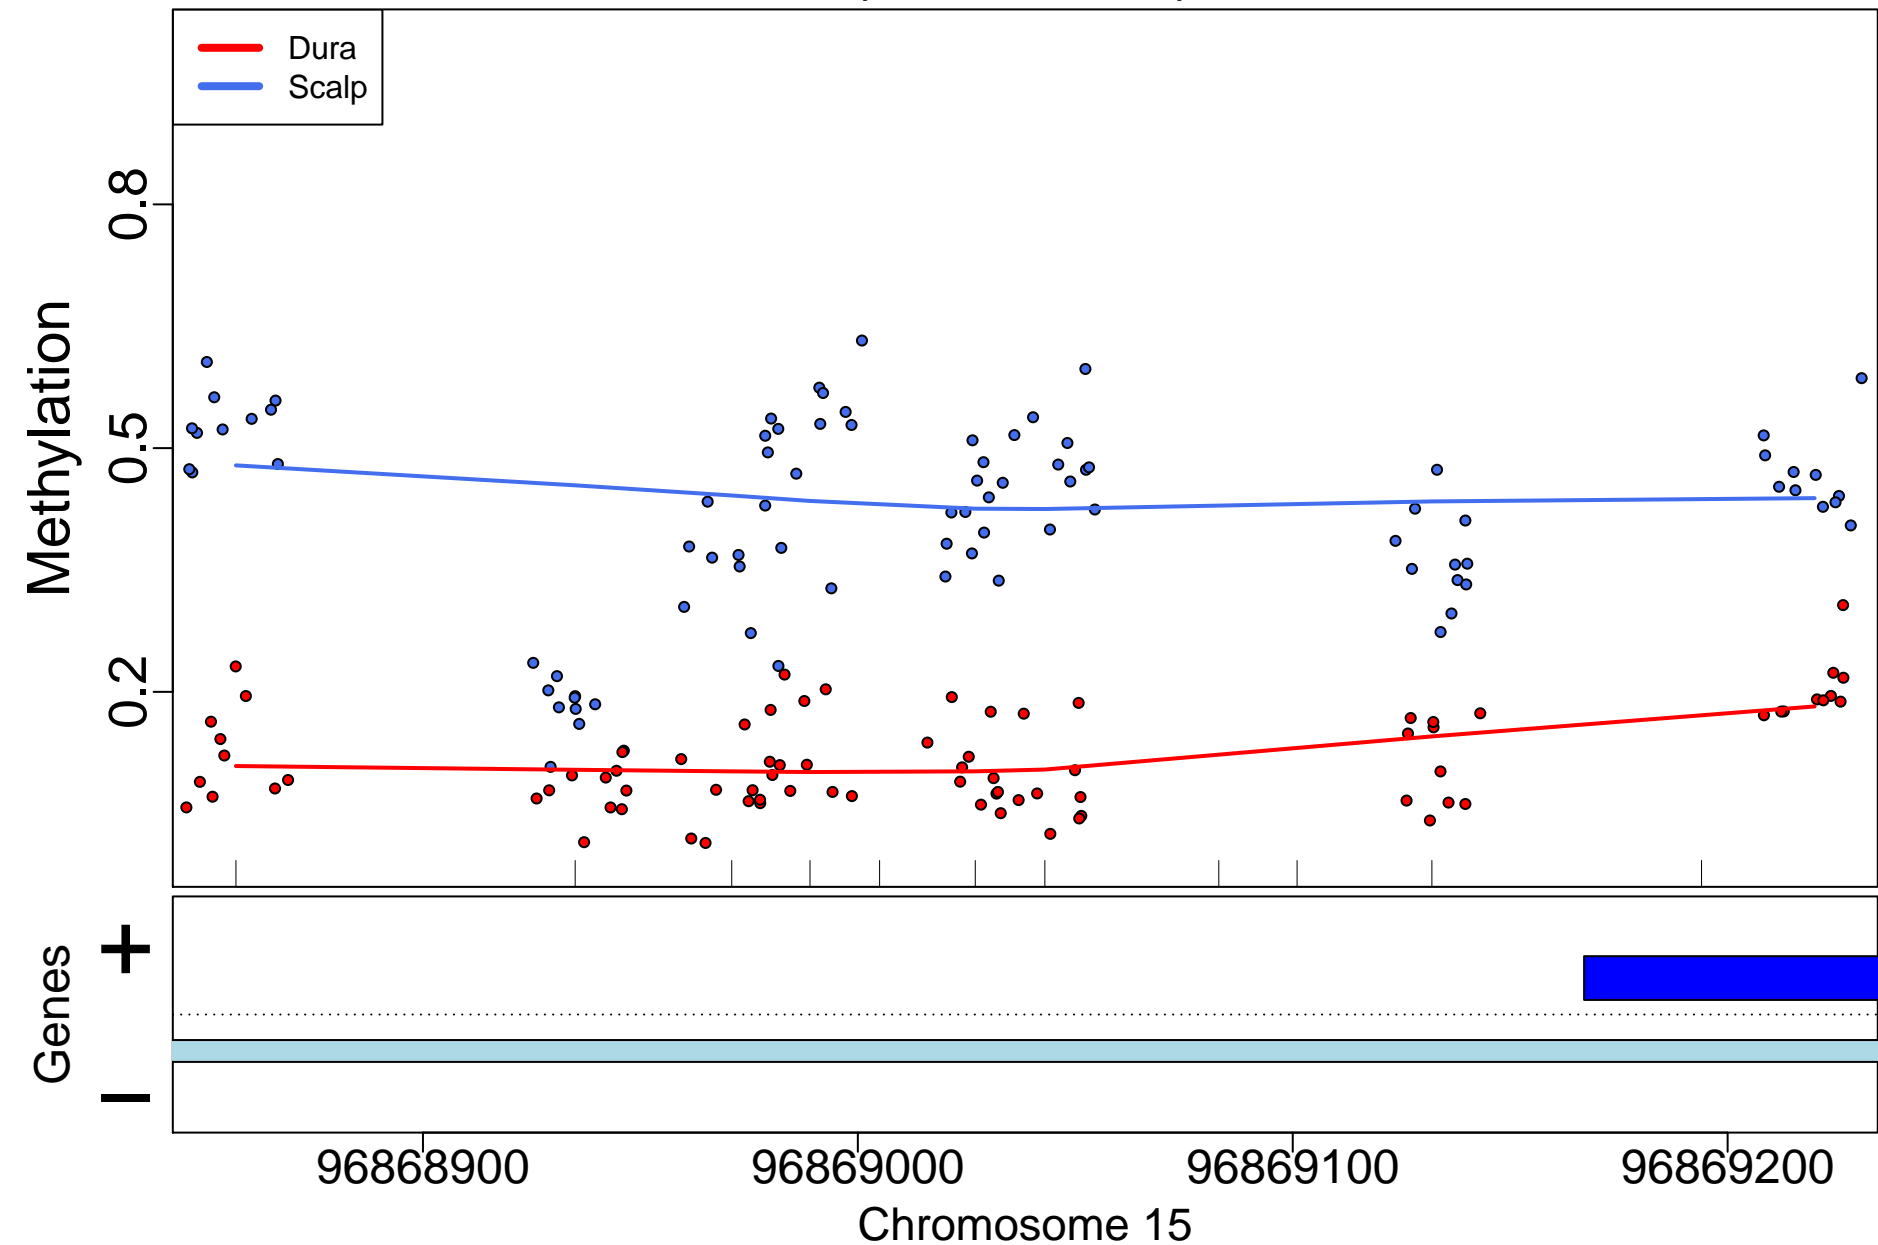

# HLX; 1555bp from tss:promoter

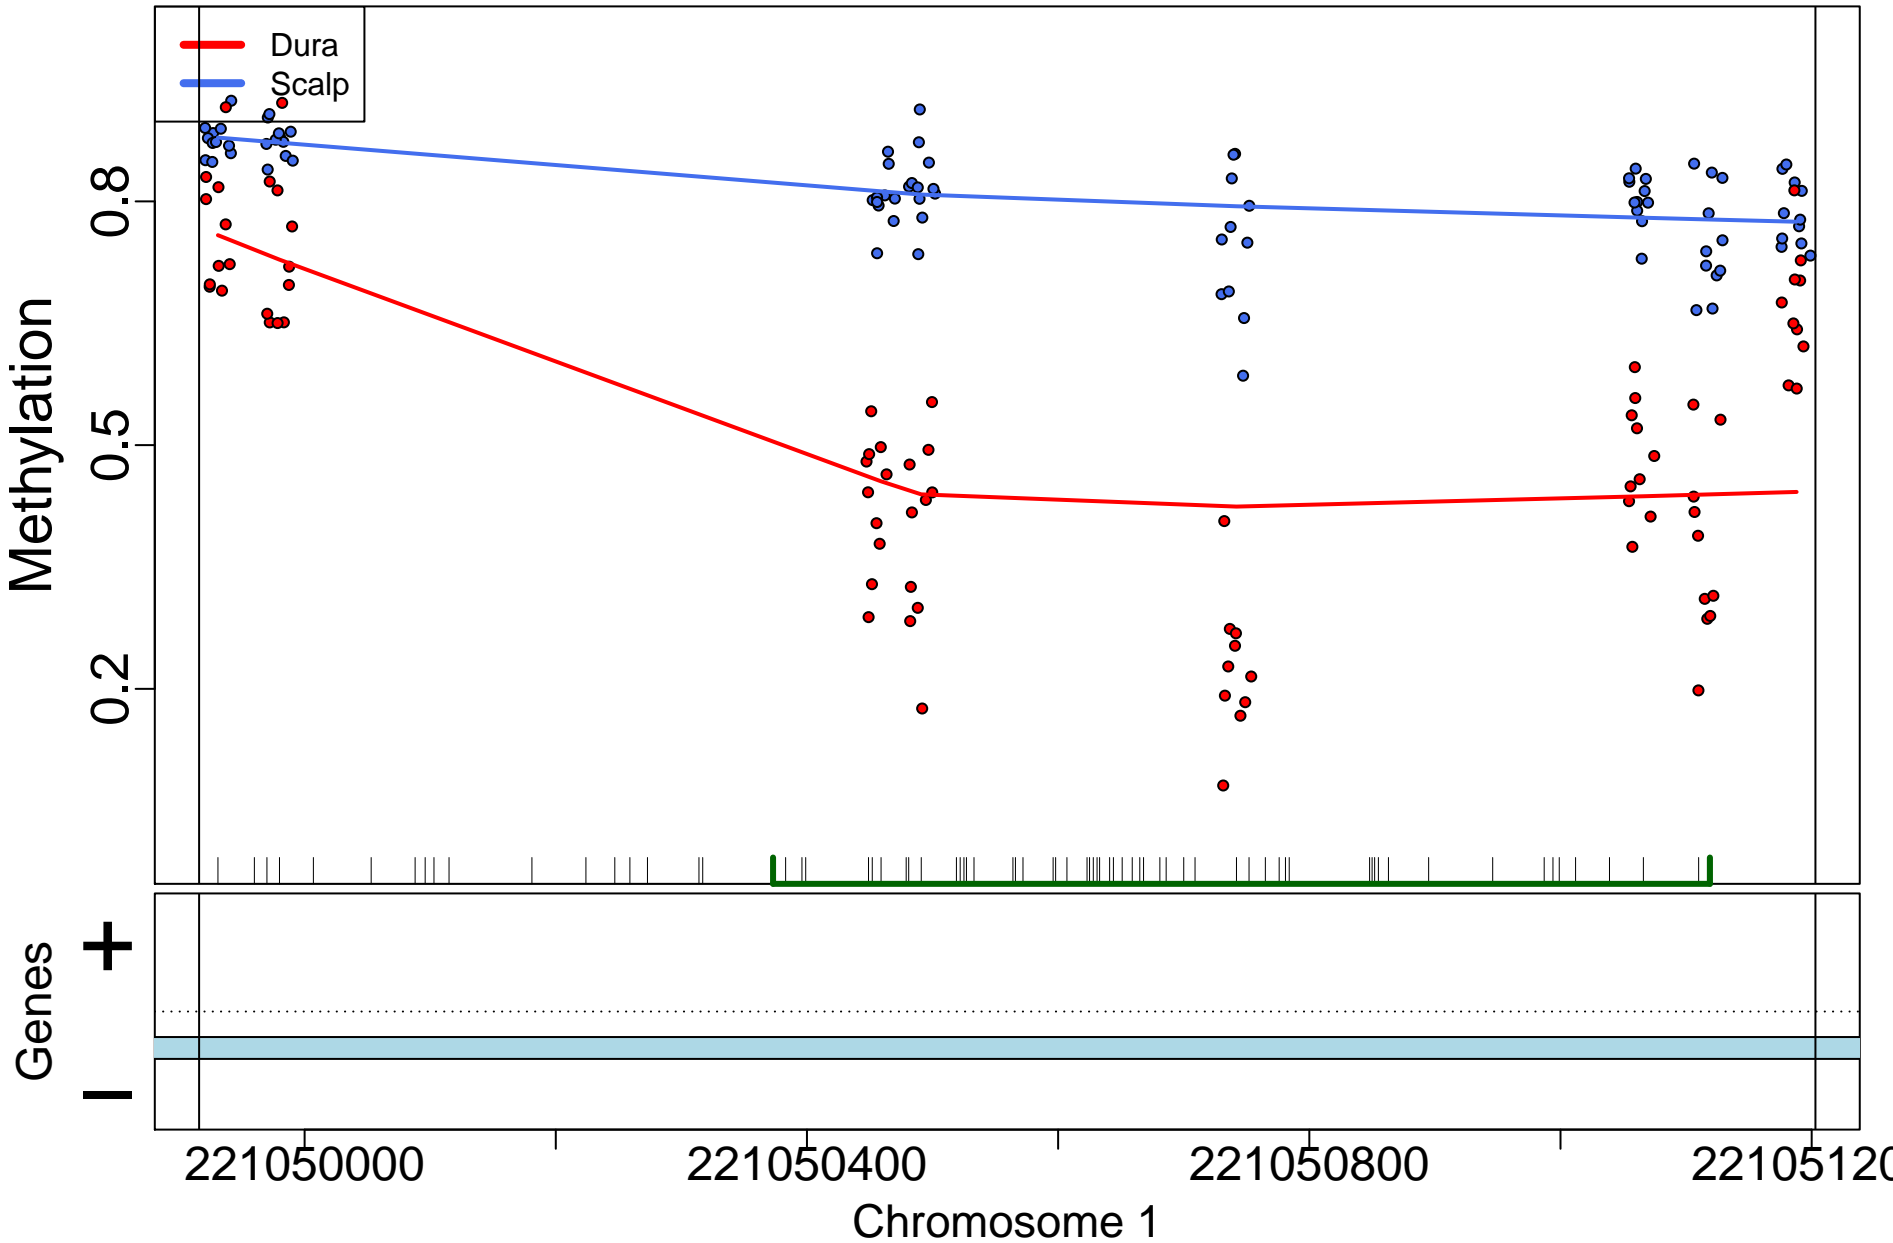

TNFAIP3; 7721bp from tss:inside exon

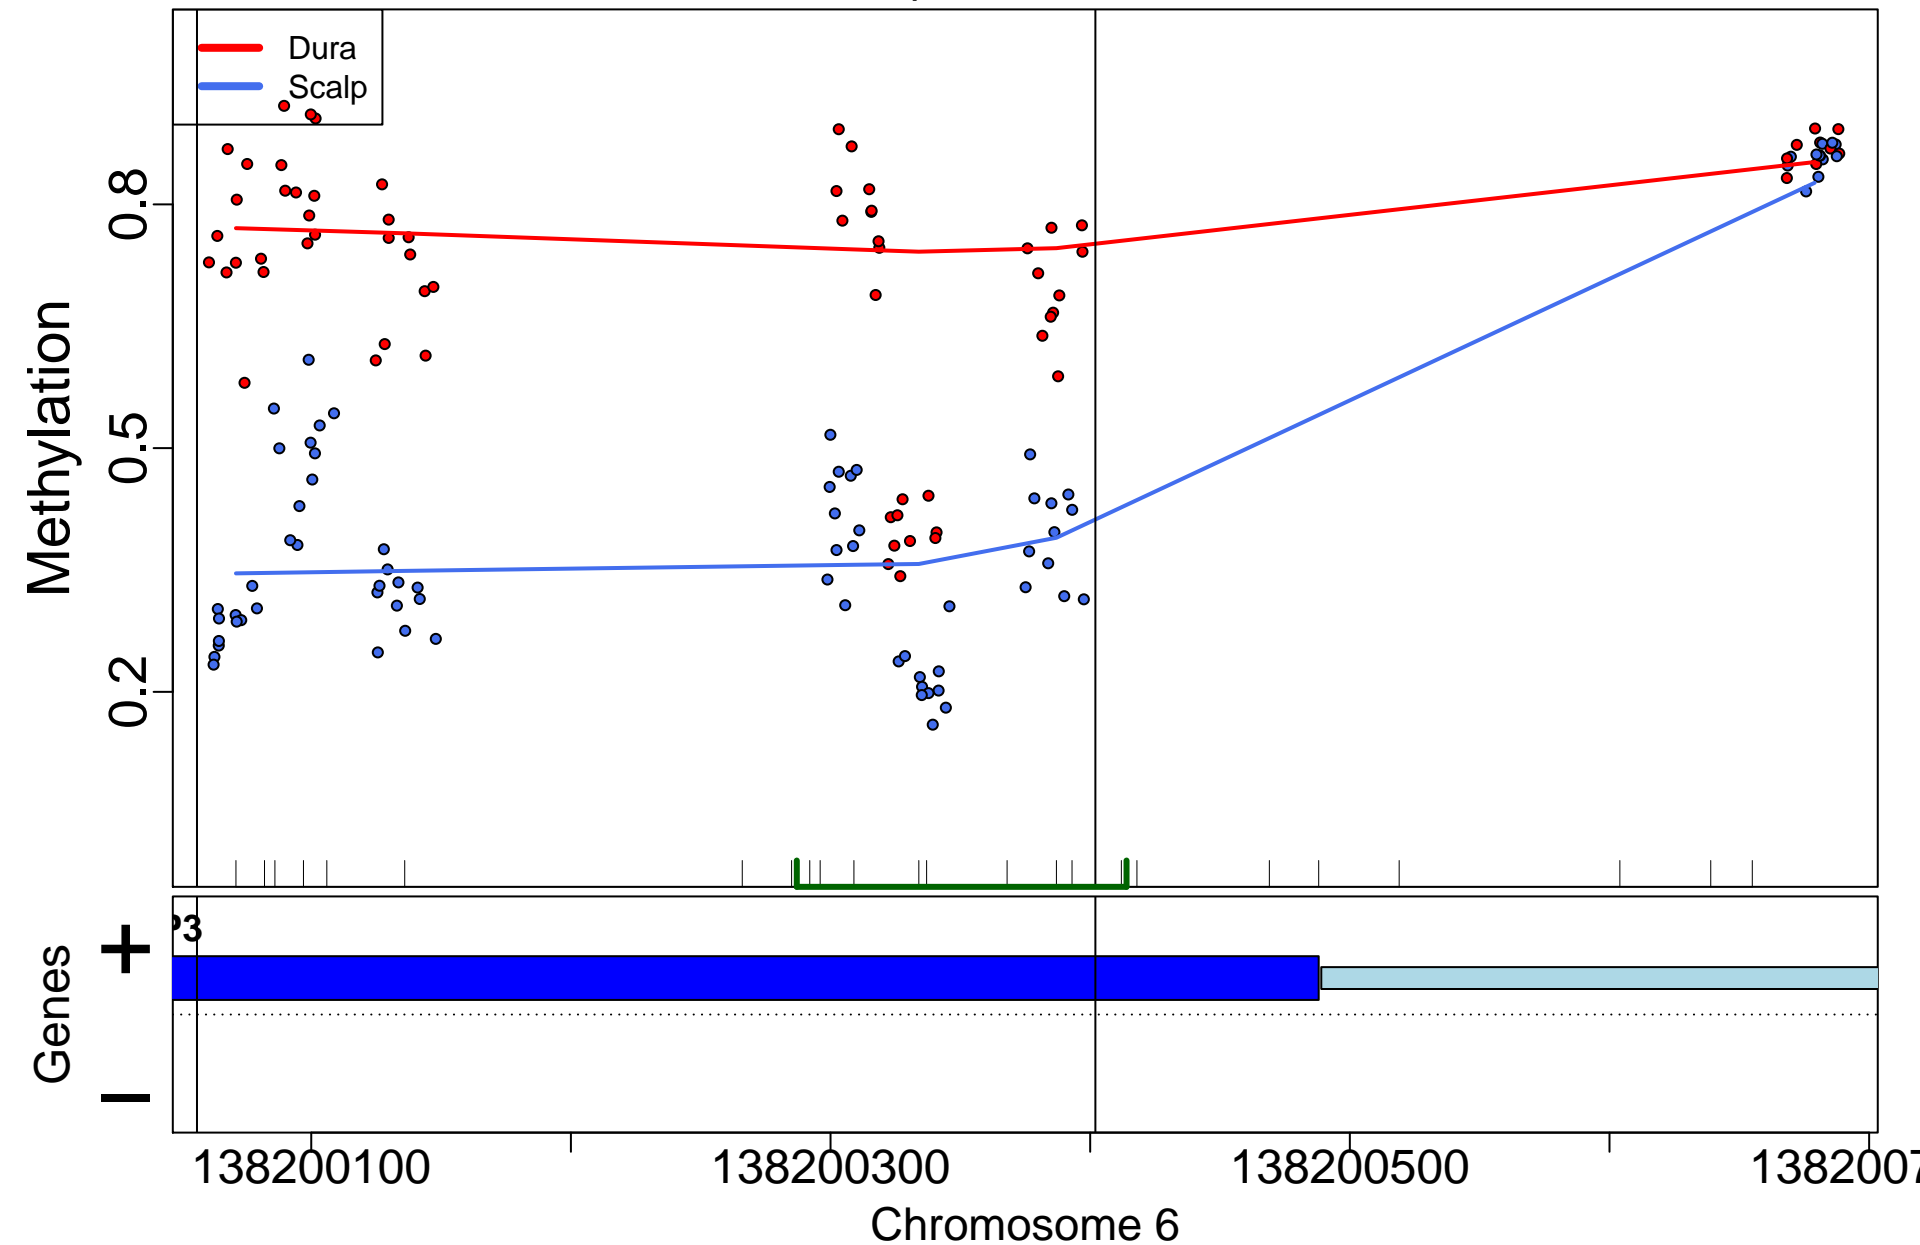



# HOXC6; 1864bp from tss:inside intron

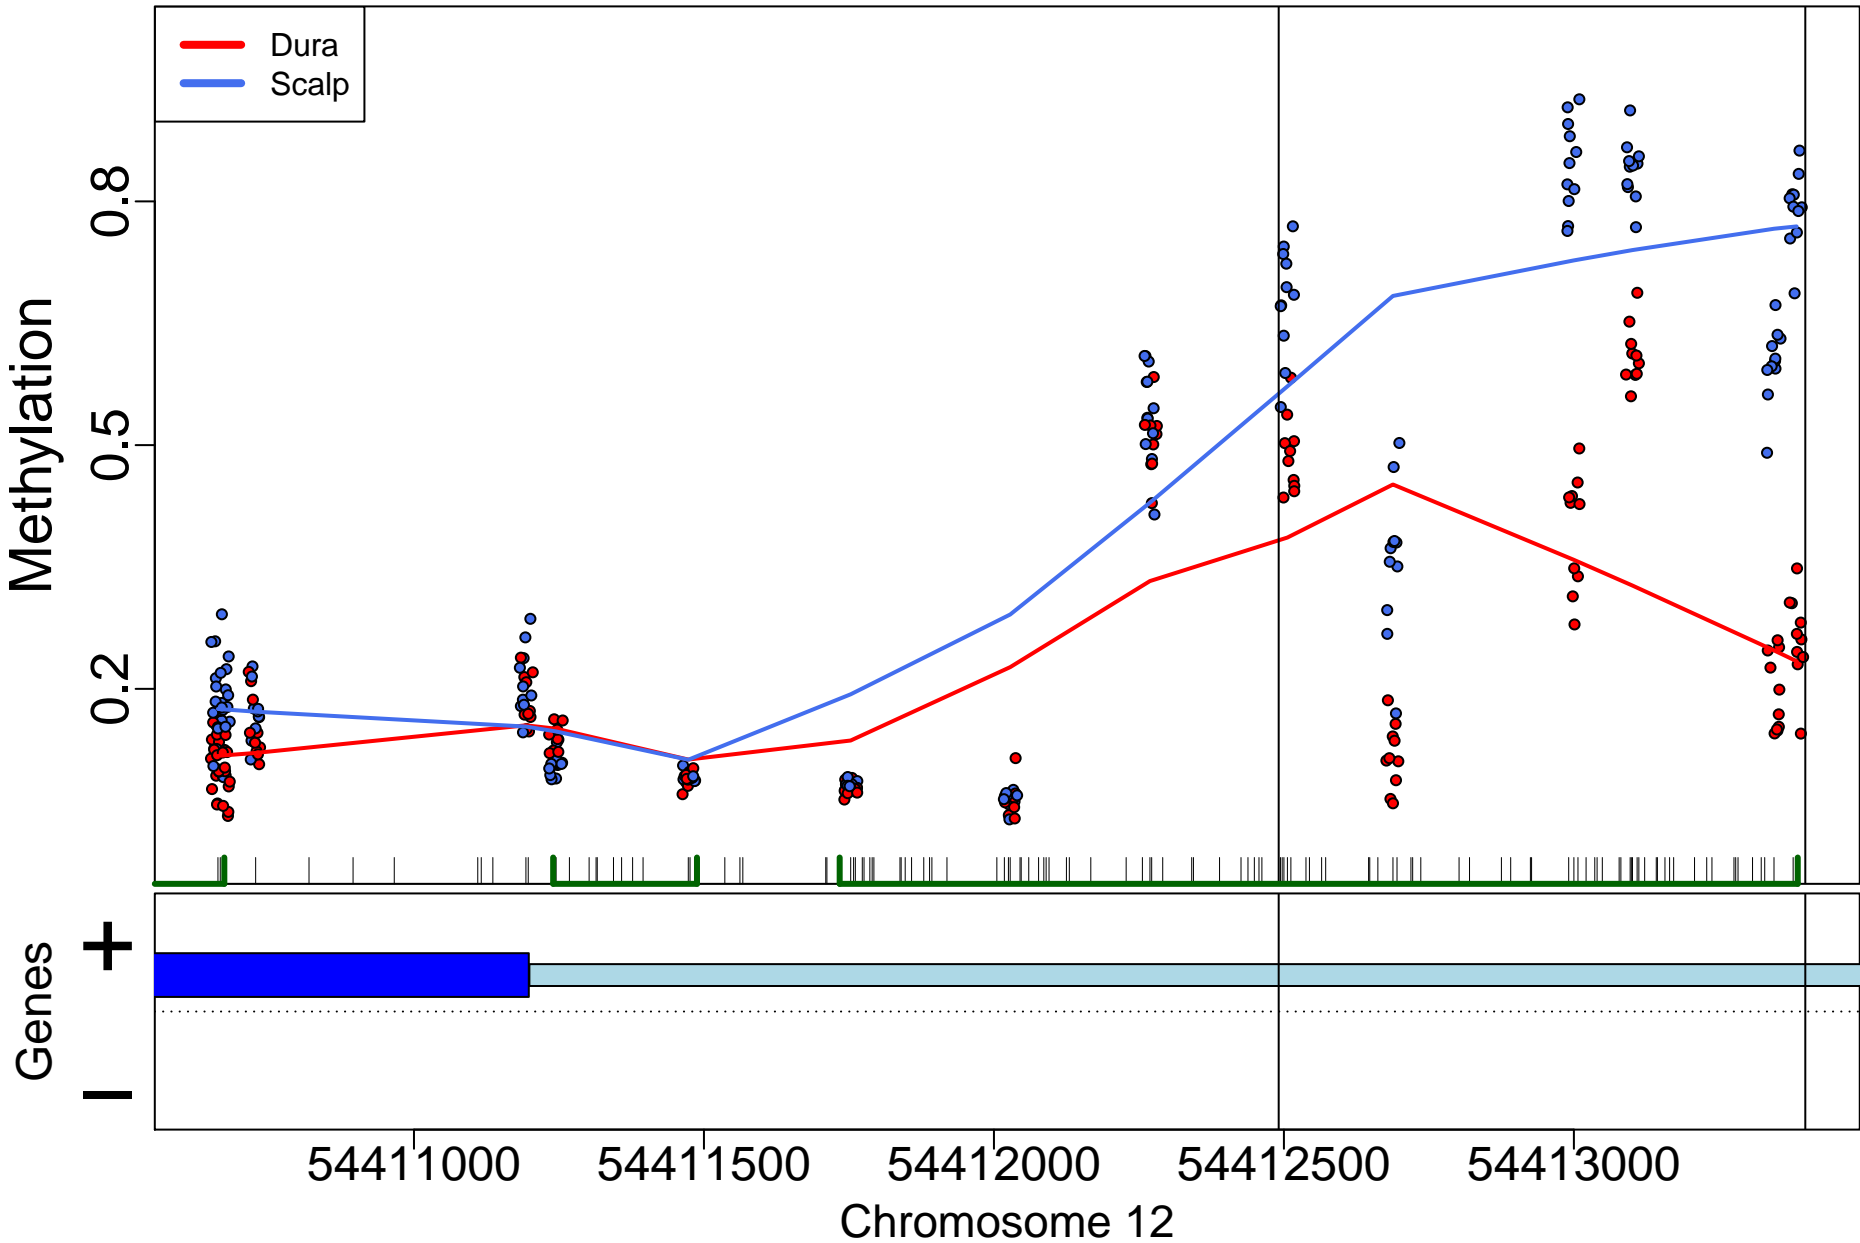

SIGIRR; 3535bp from tss:overlaps 3'

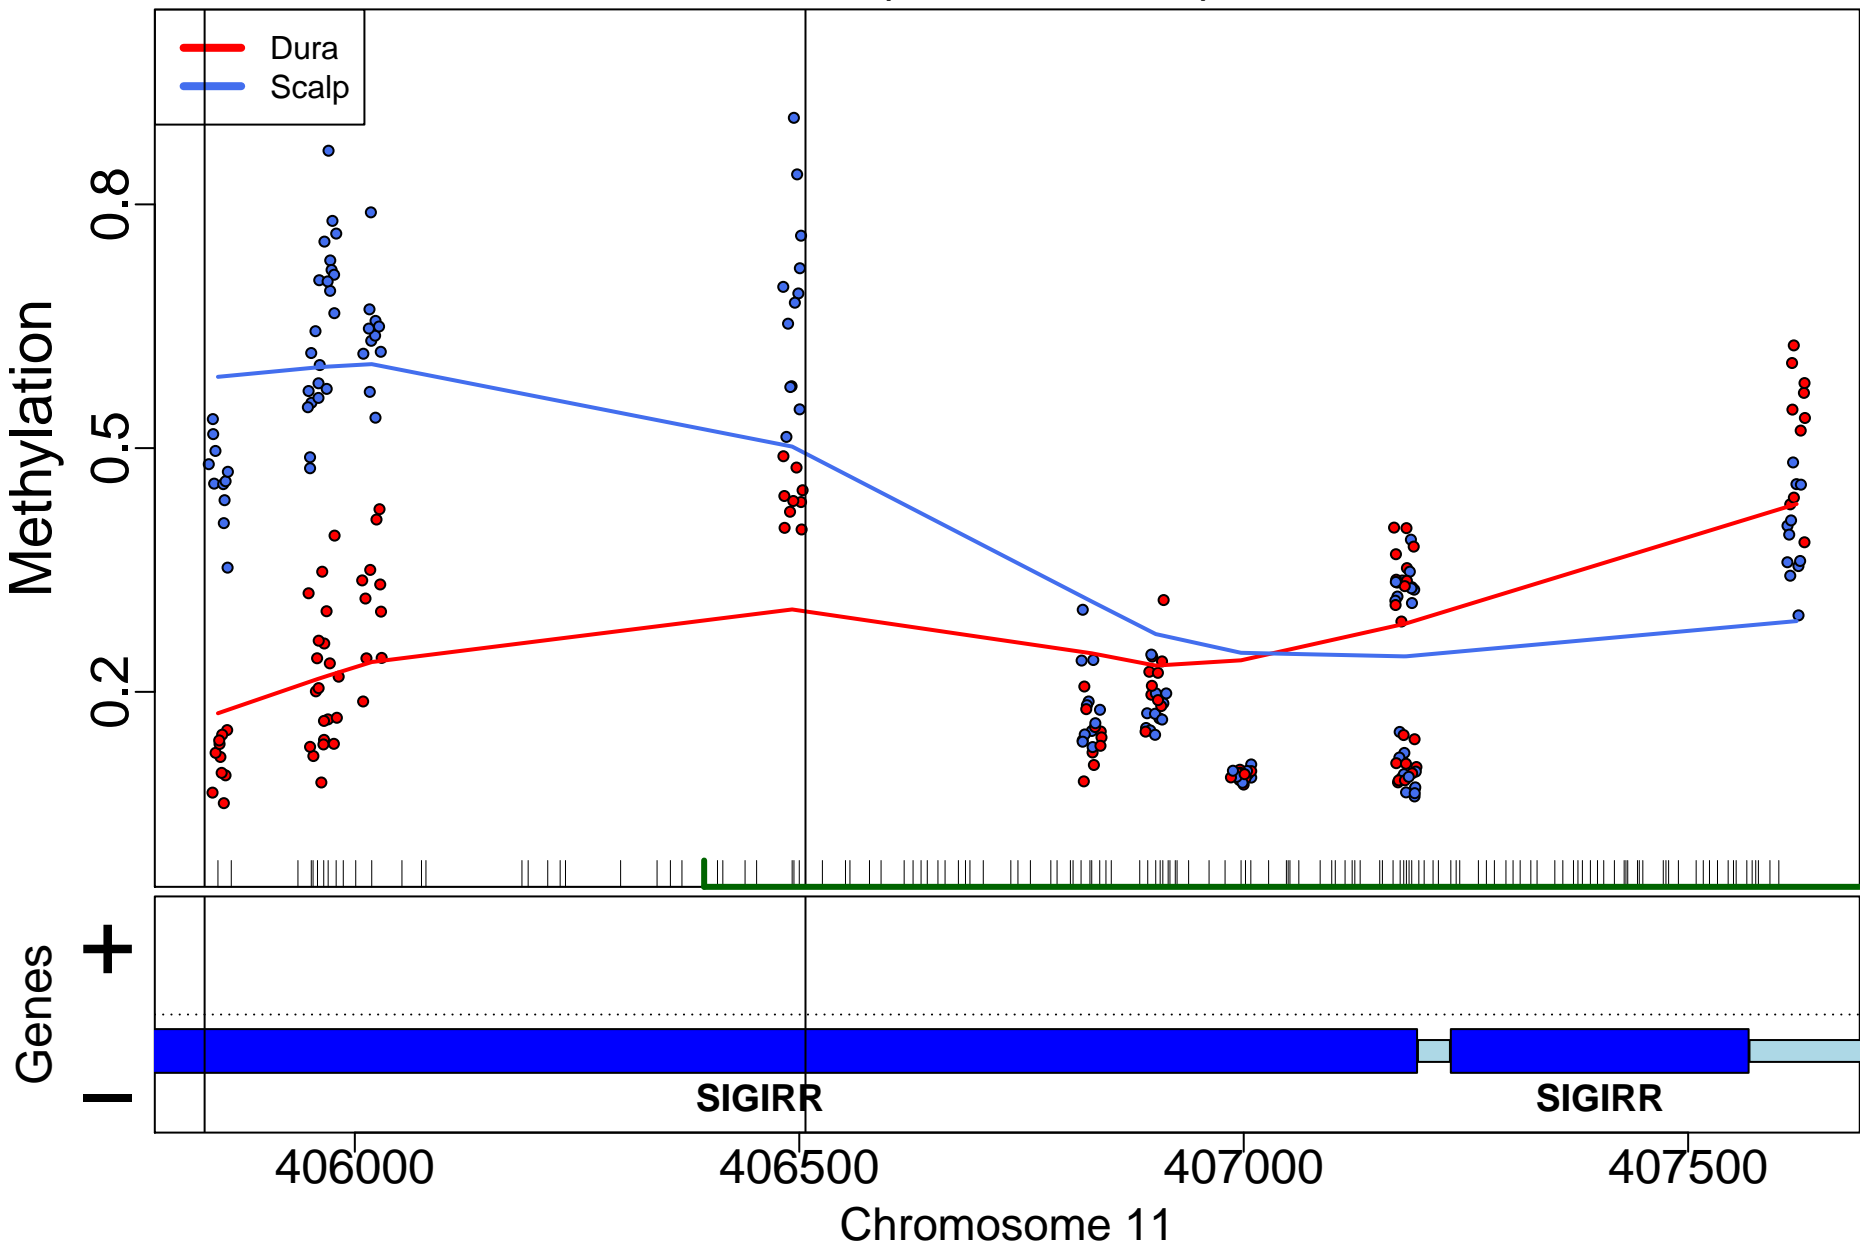

# MIR5580; 0bp from tss:NA

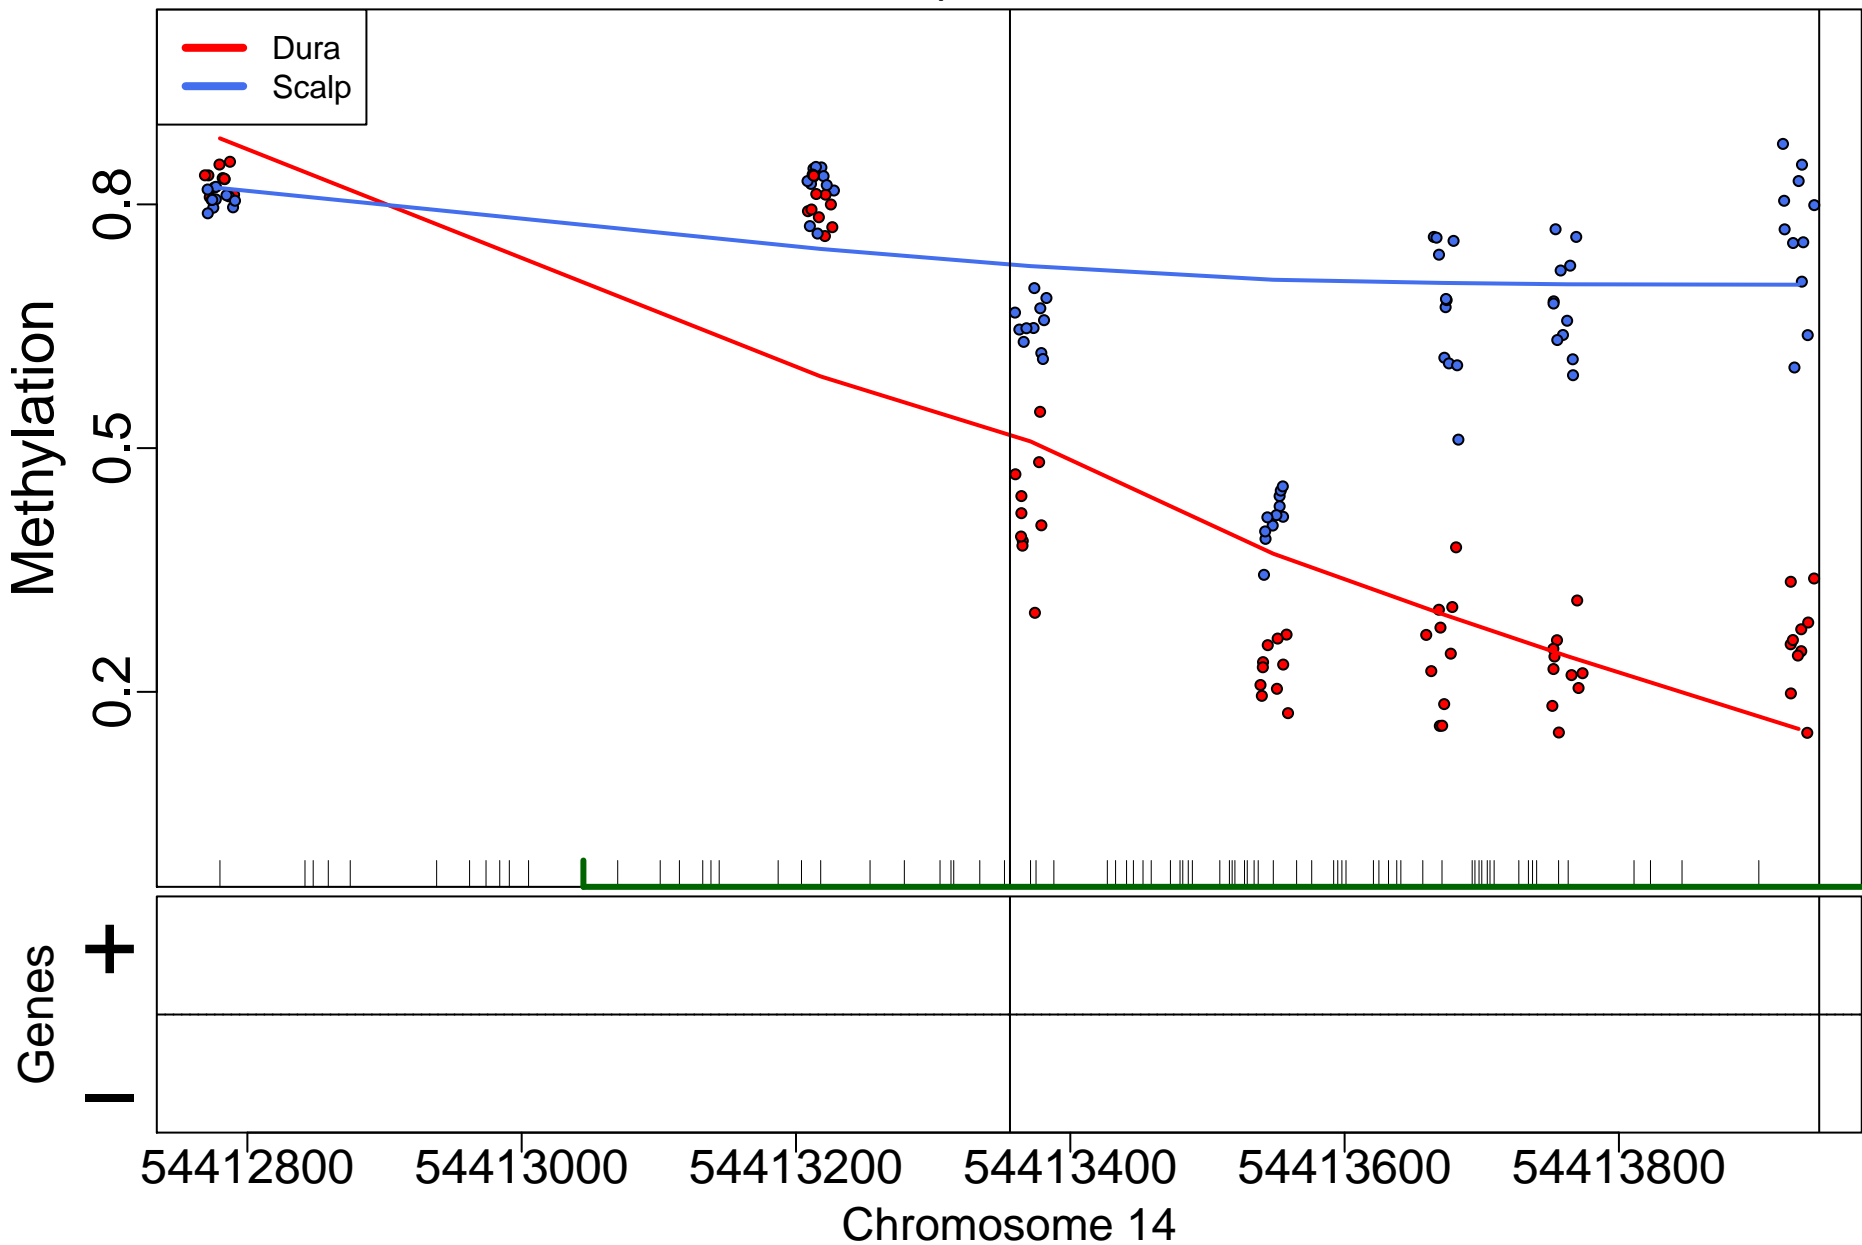

MBP; 115223bp from tss:inside intron

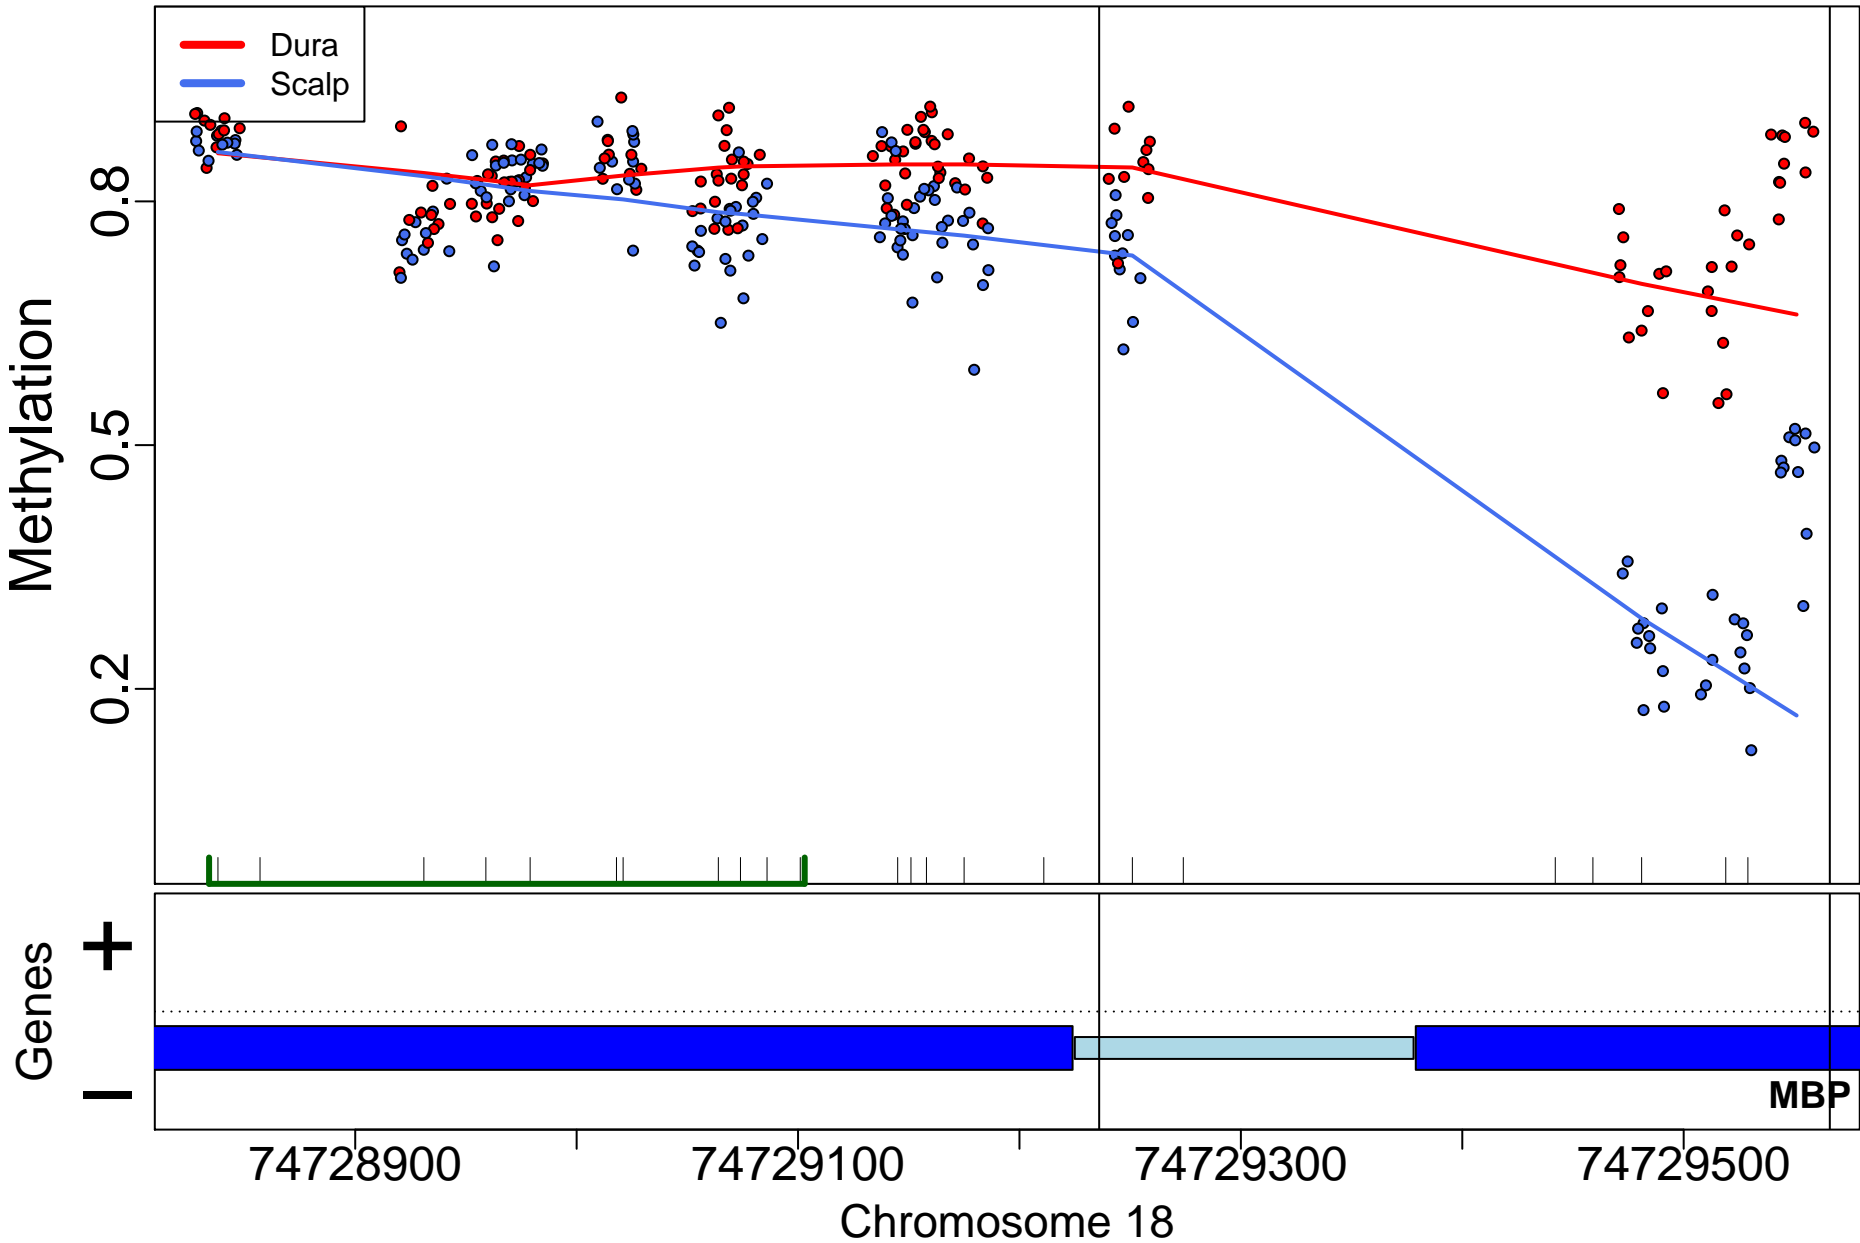

# HOXB3; 10941bp from tss:inside intron

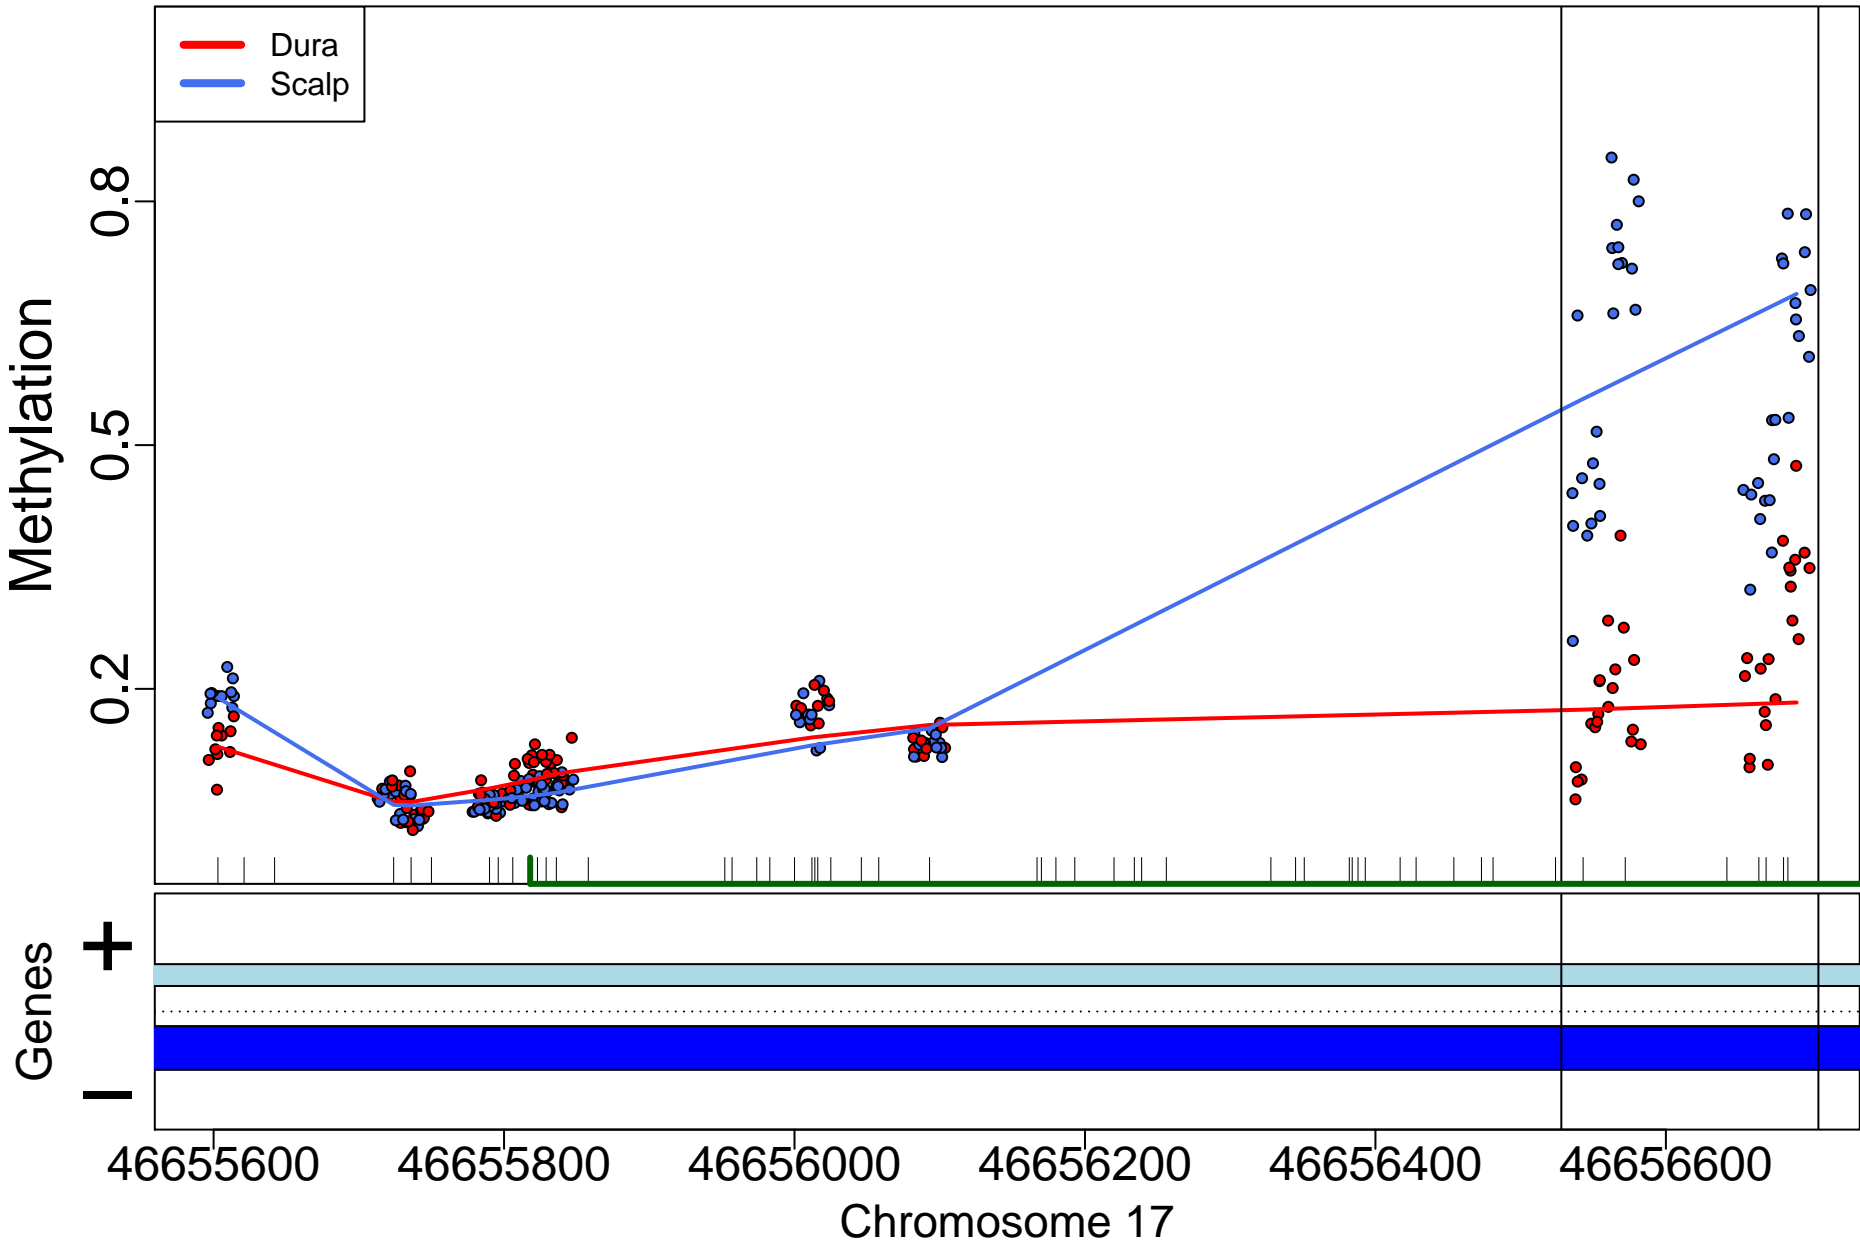

HOXB-AS3; 0bp from tss:NA

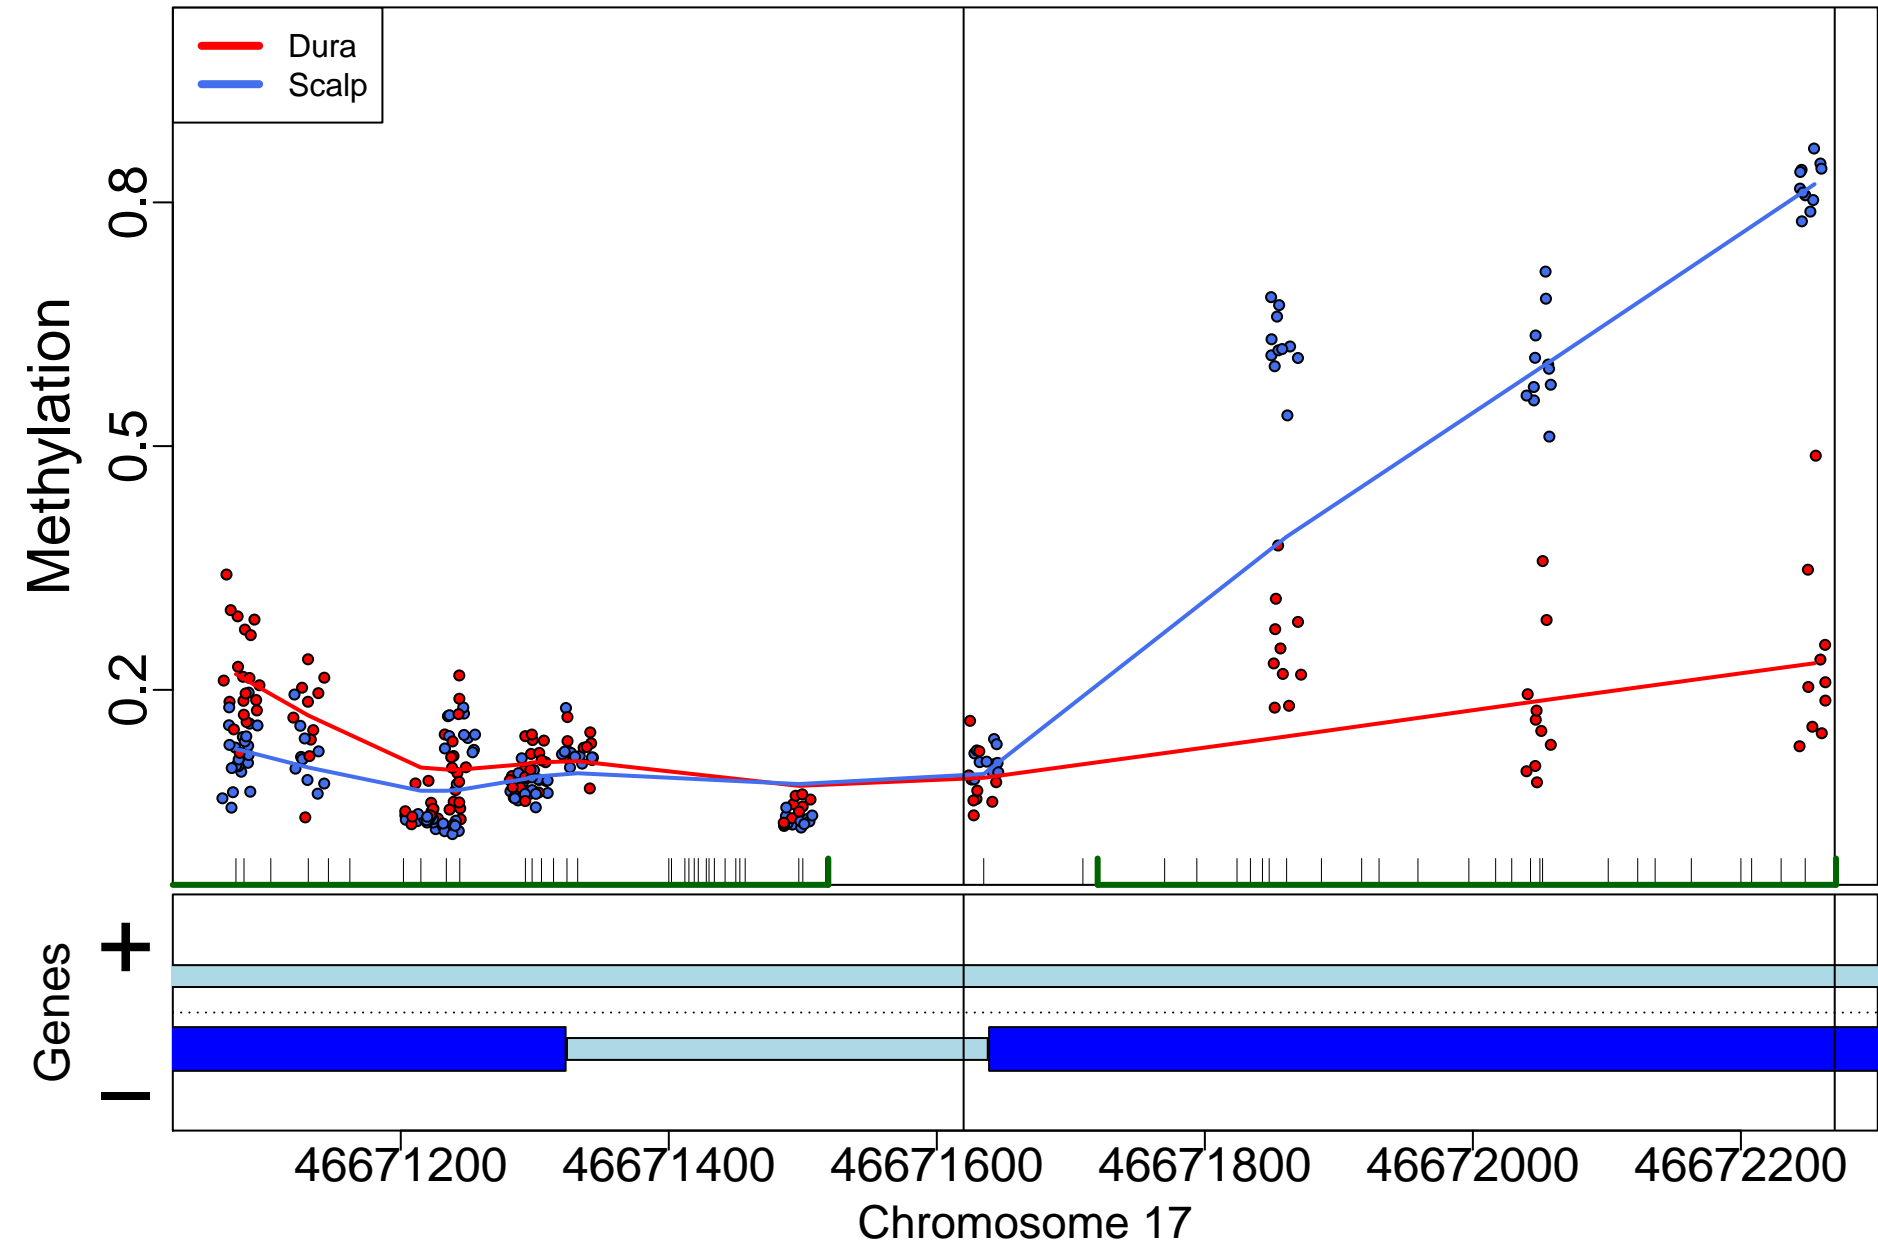

# HOXC4; 604bp from tss:overlaps exon upstream

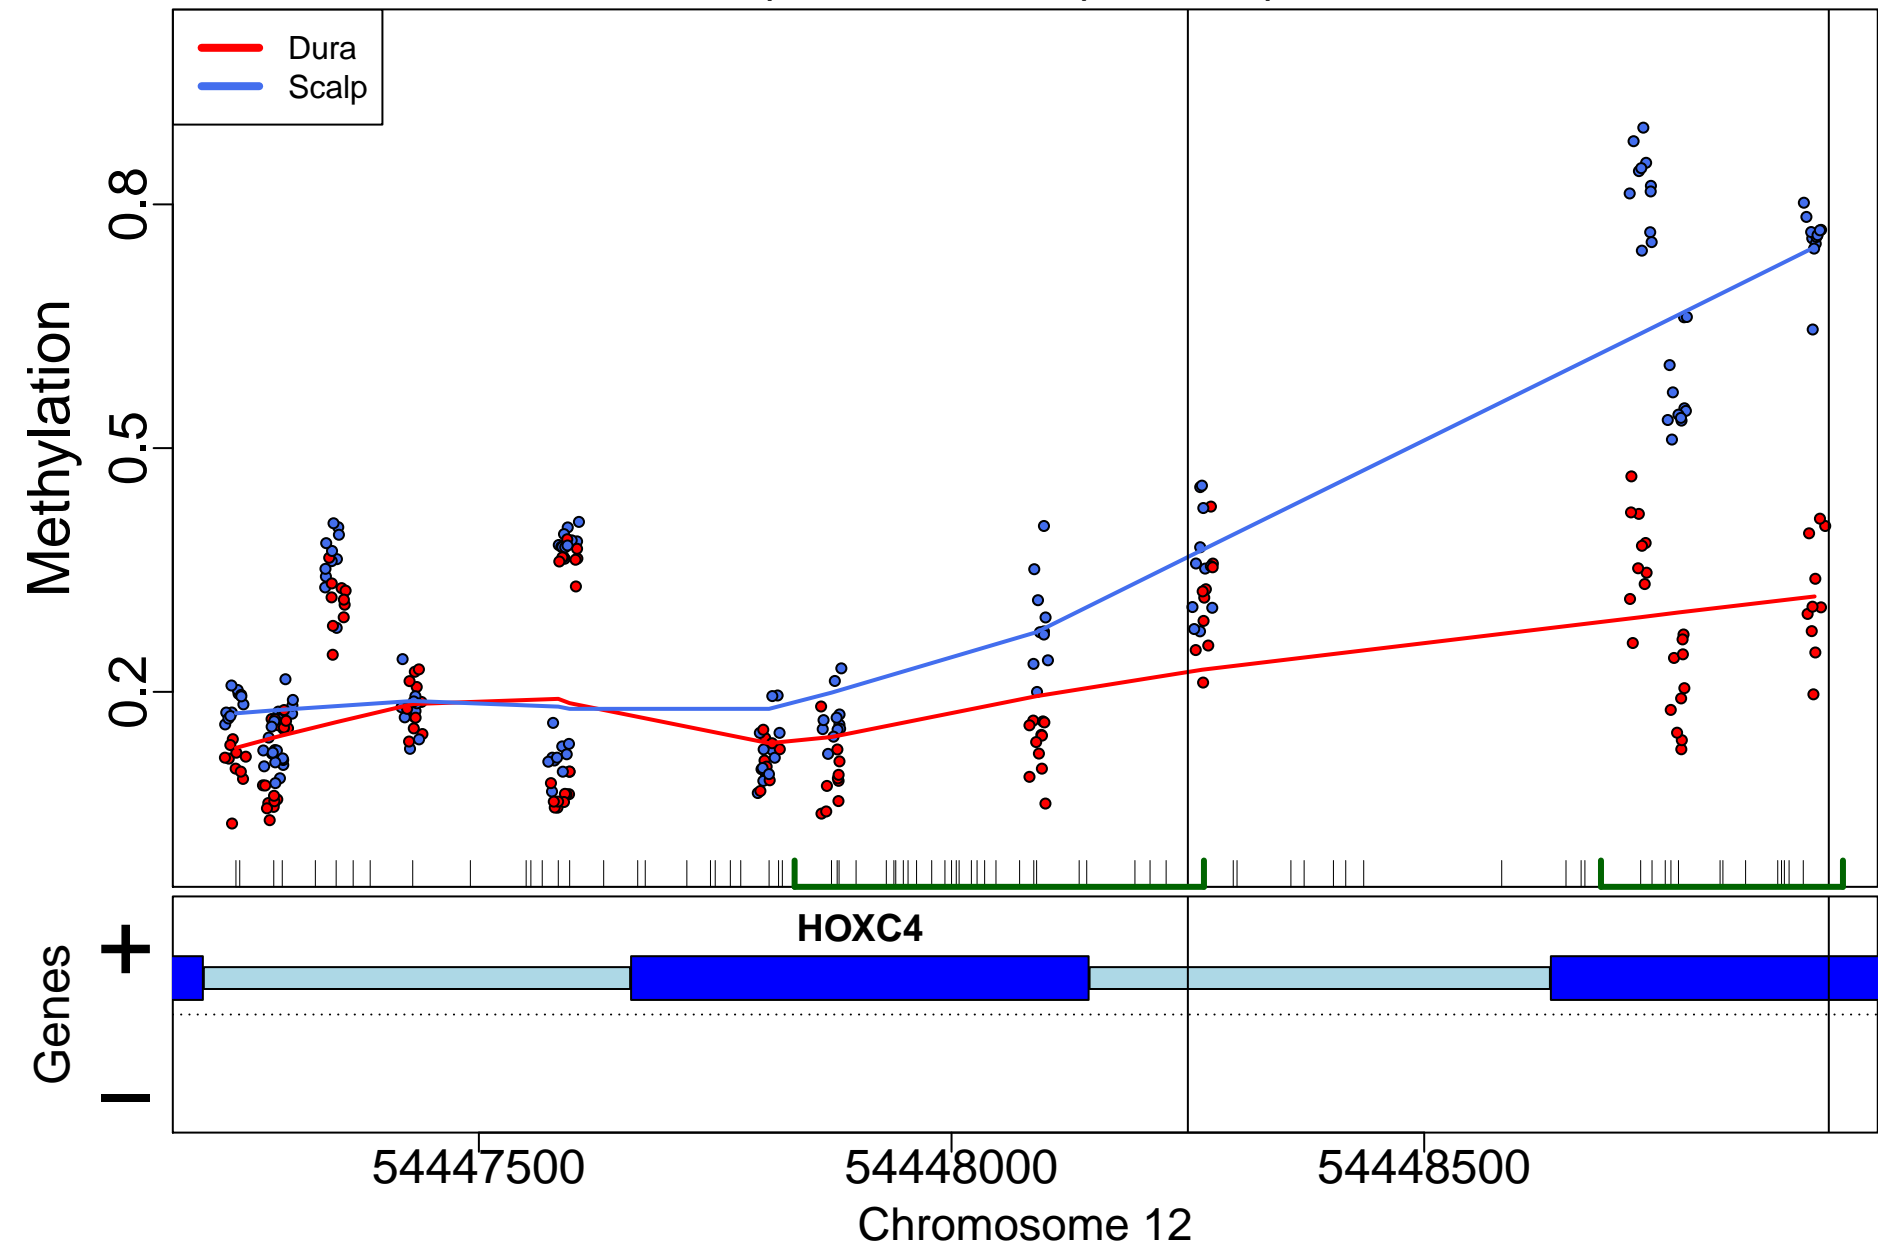

MOB3A; 626bp from tss:inside intron

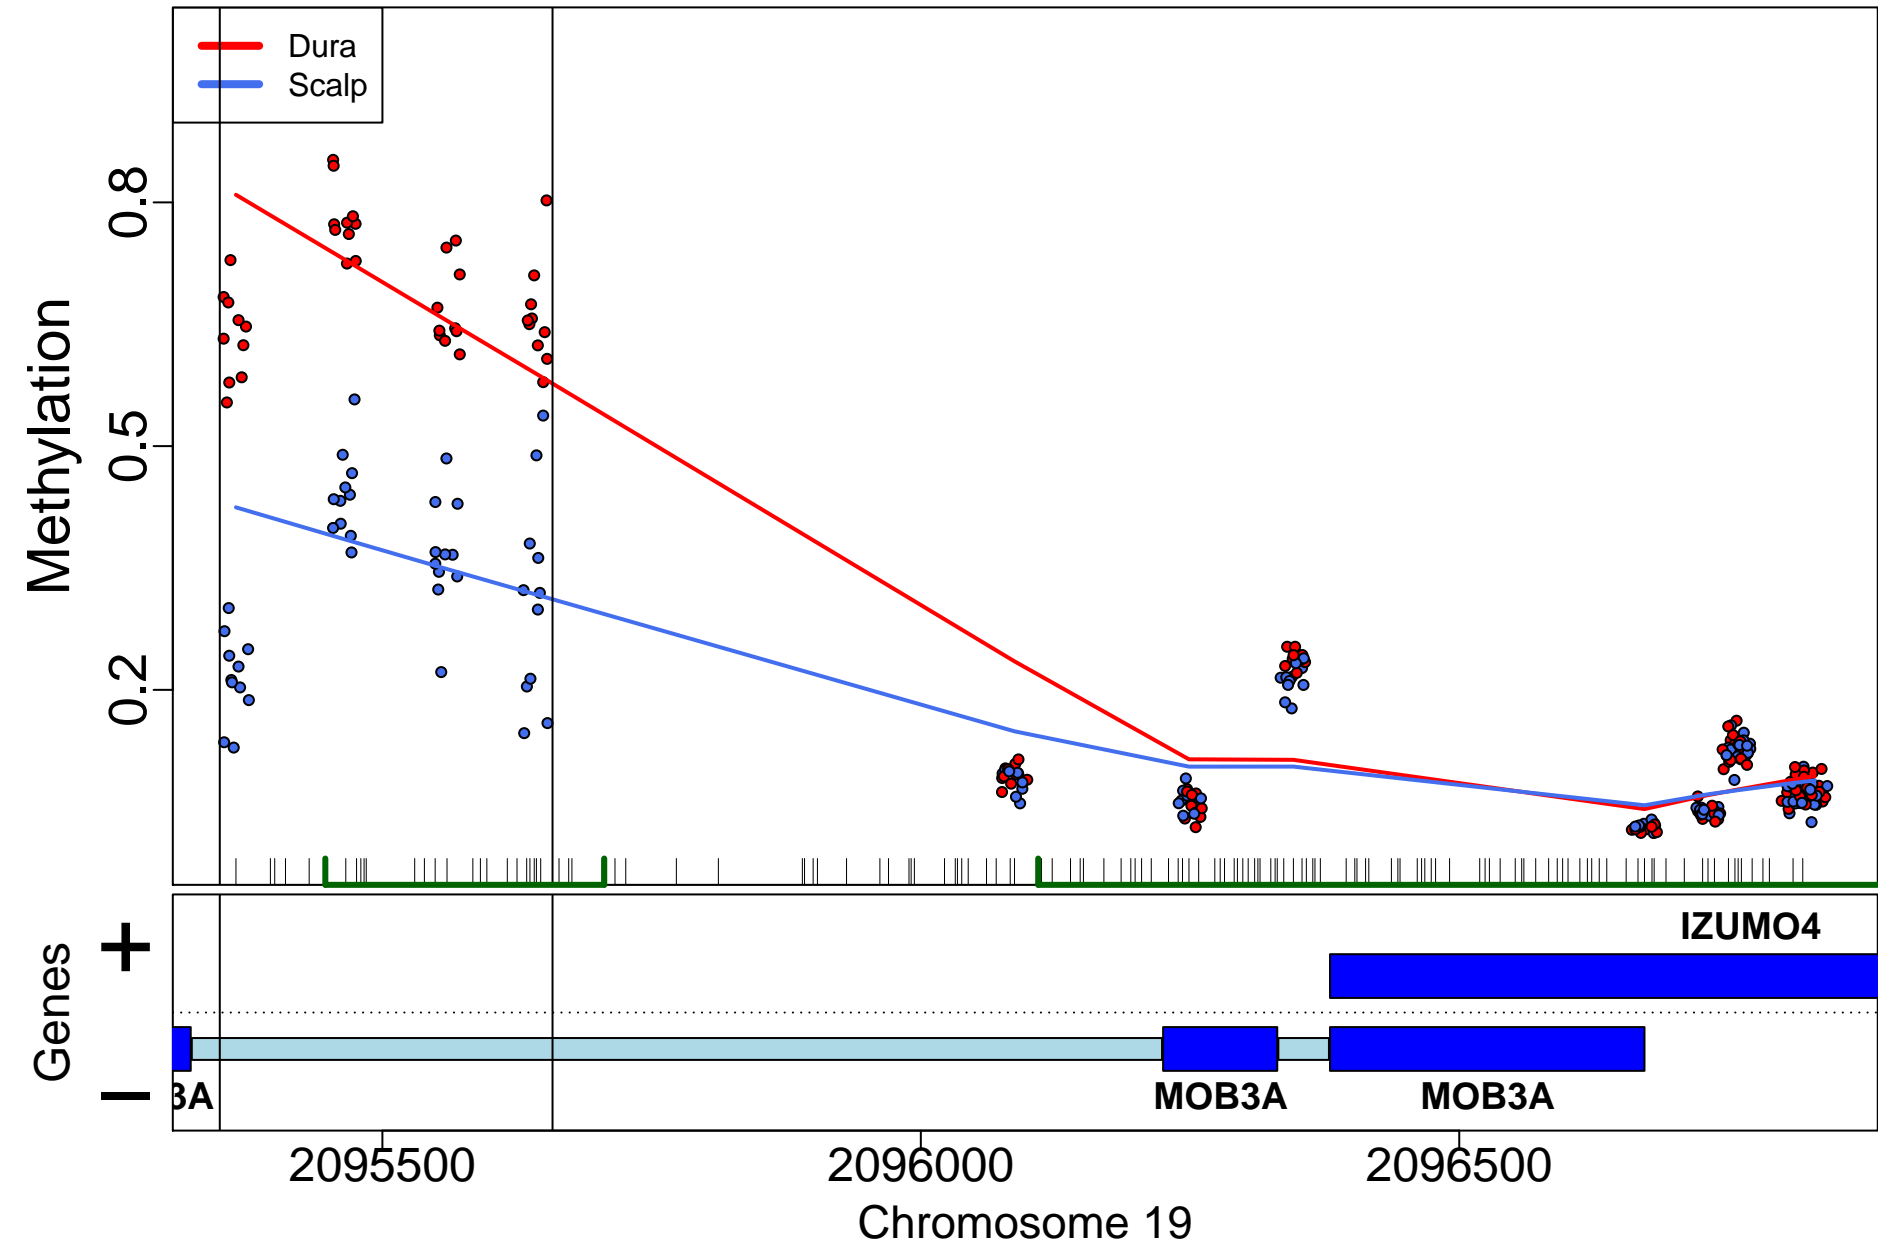



IRX6; 0bp from tss:NA

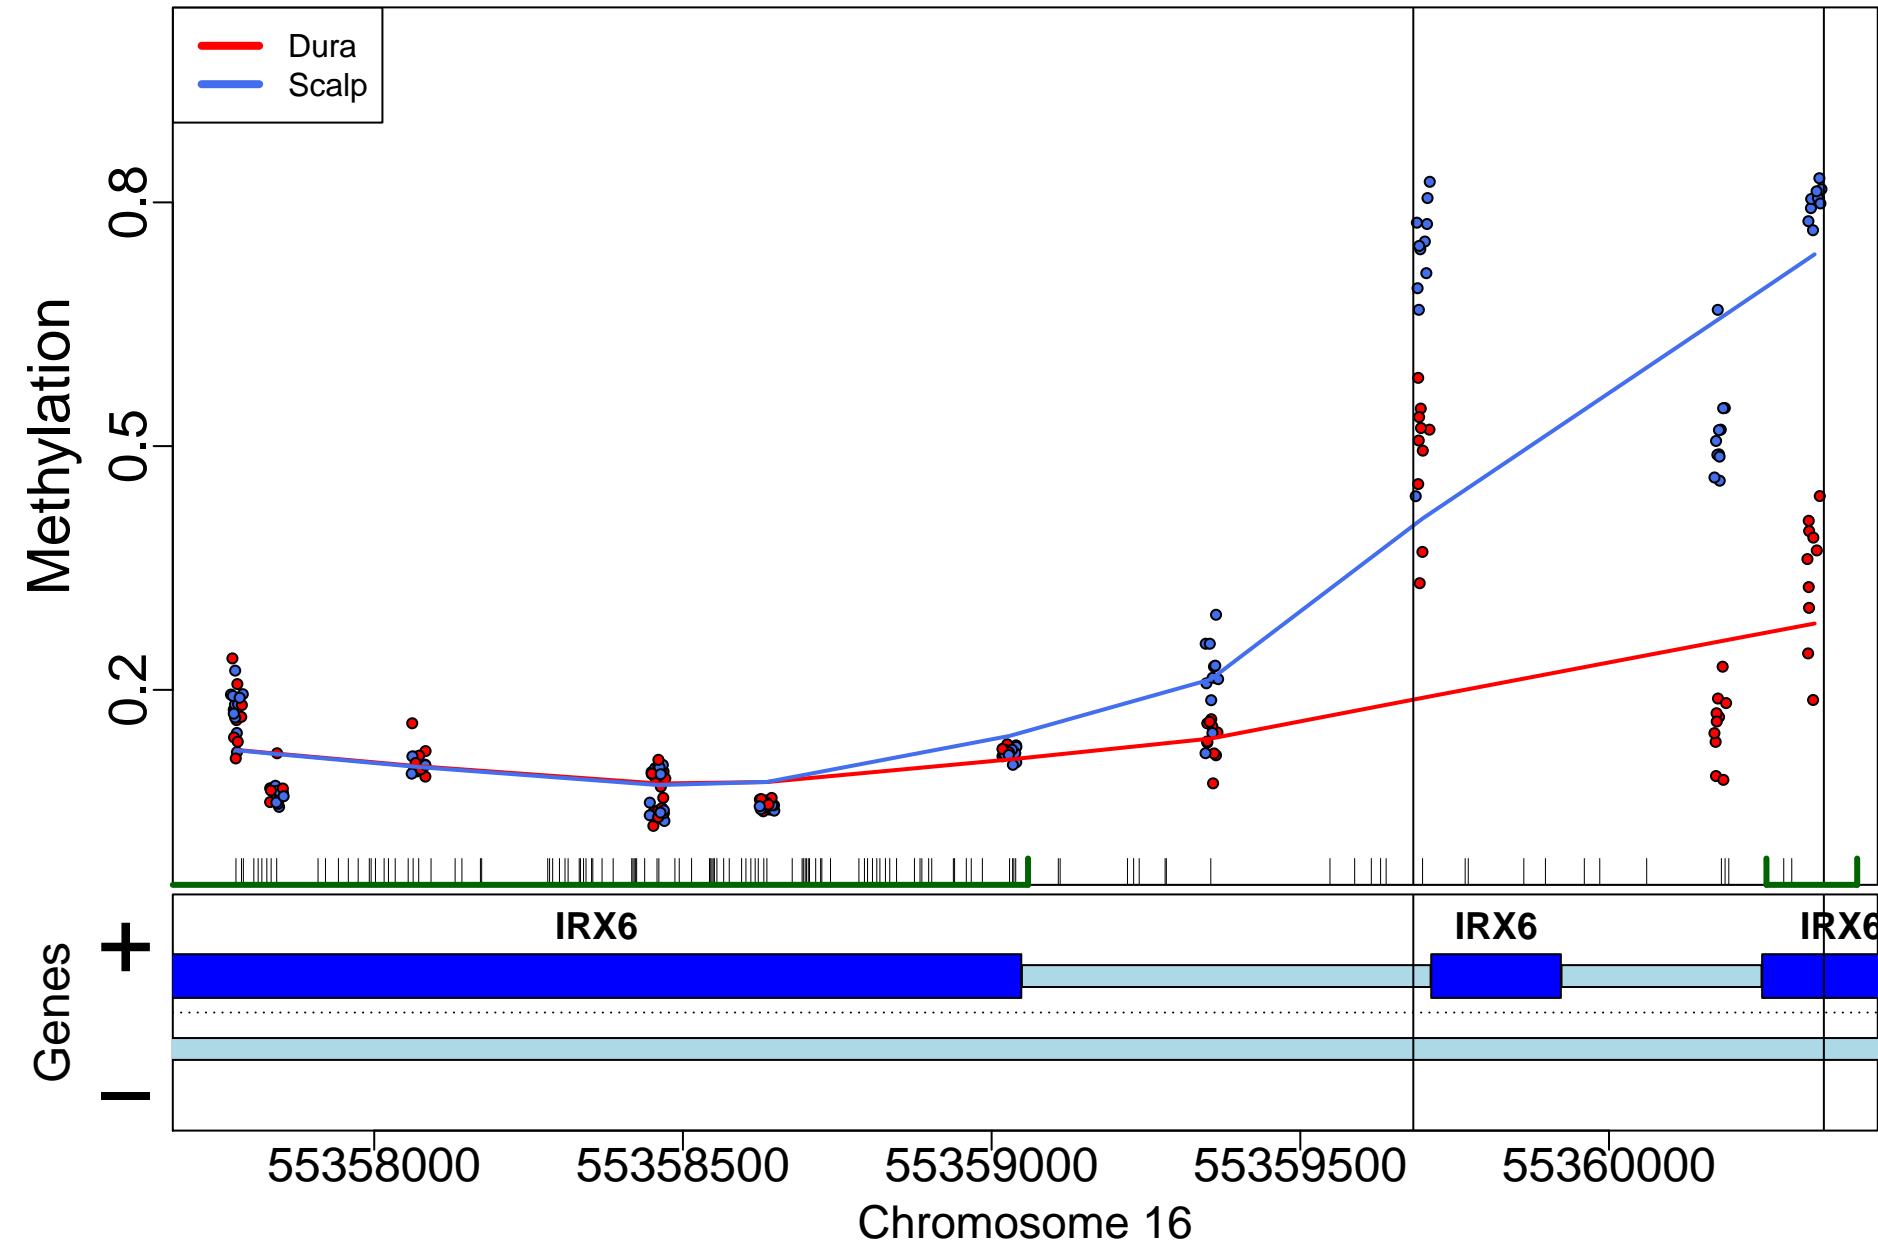

# HOXD11; 0bp from tss:NA

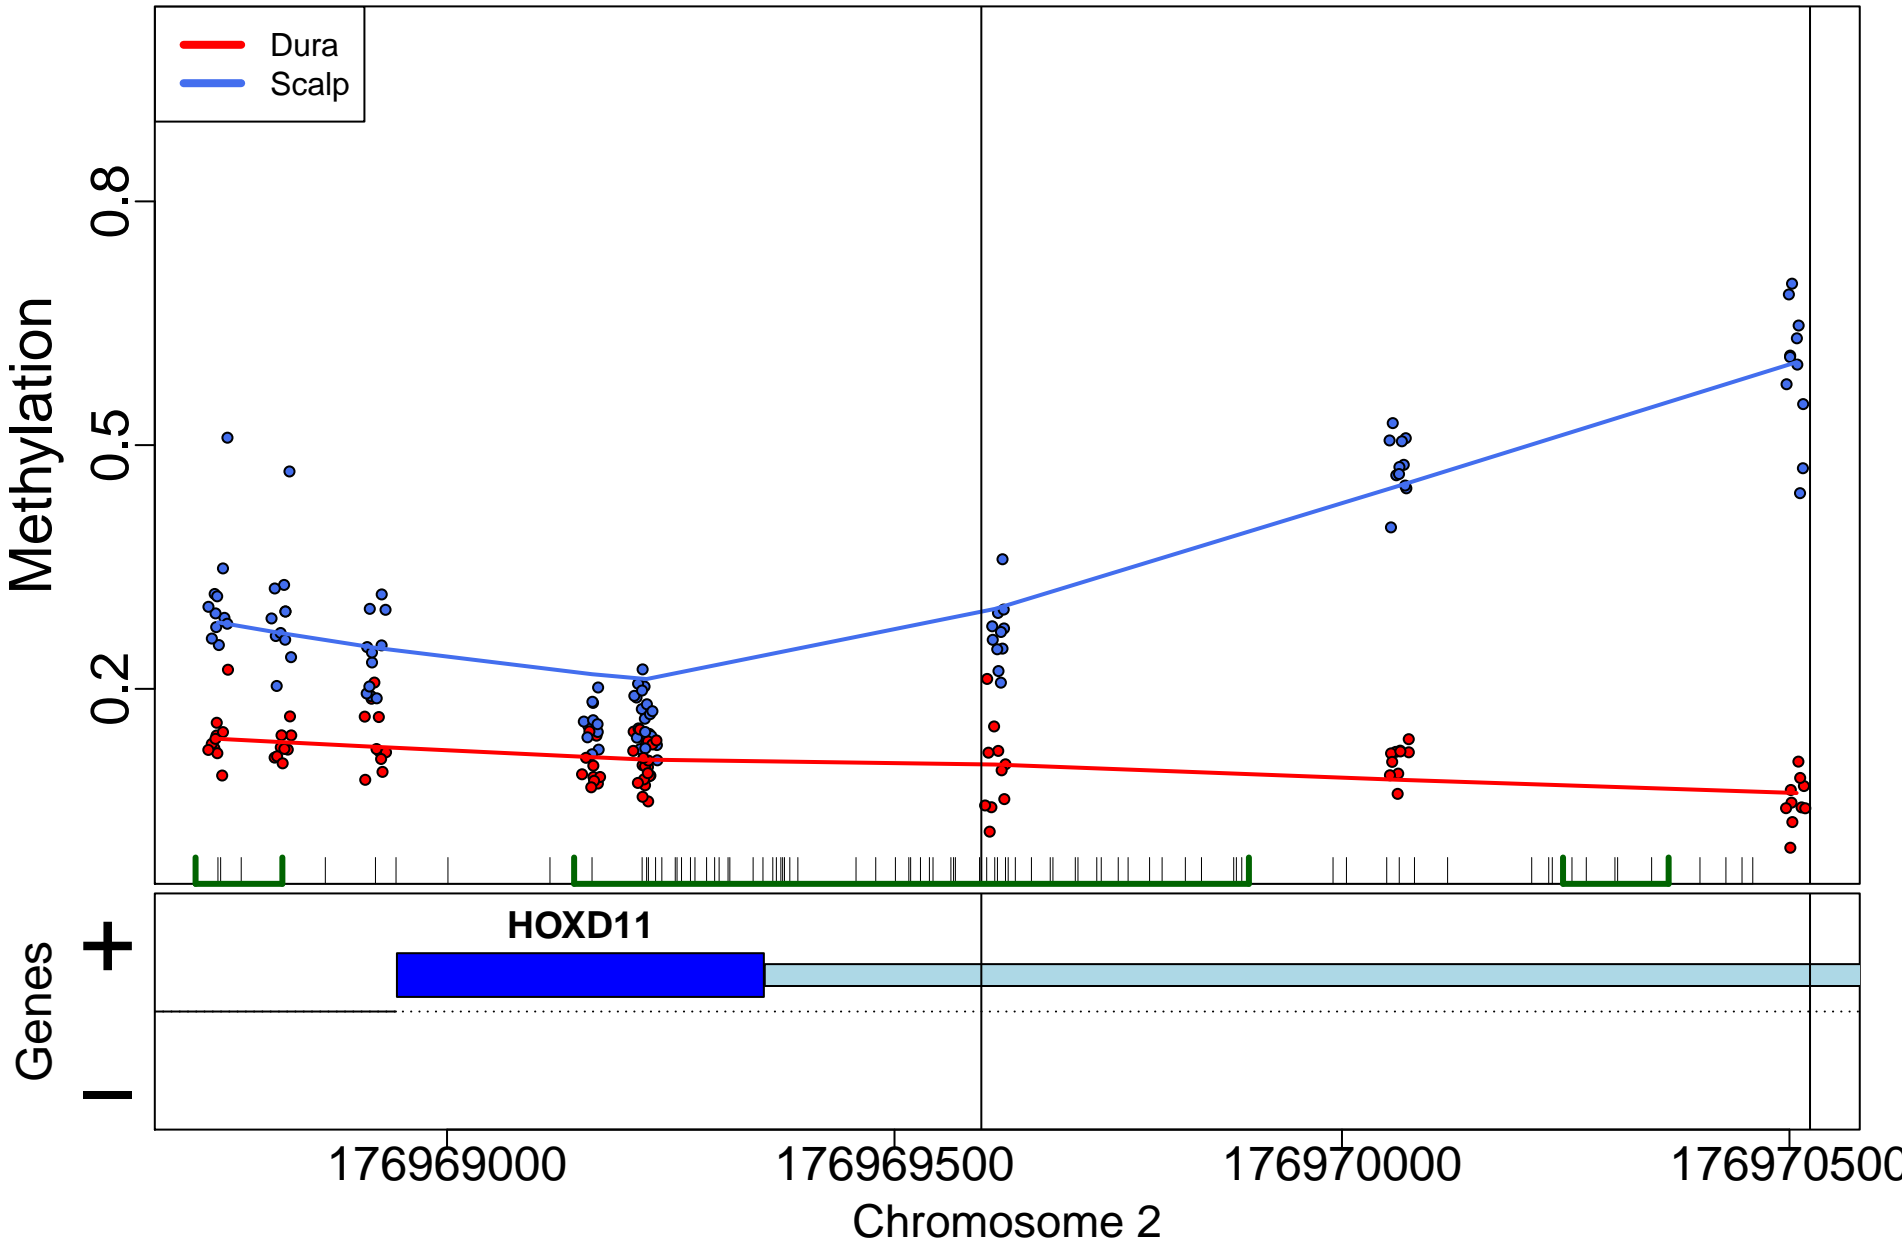

AP3B1; 321237bp from tss:downstream

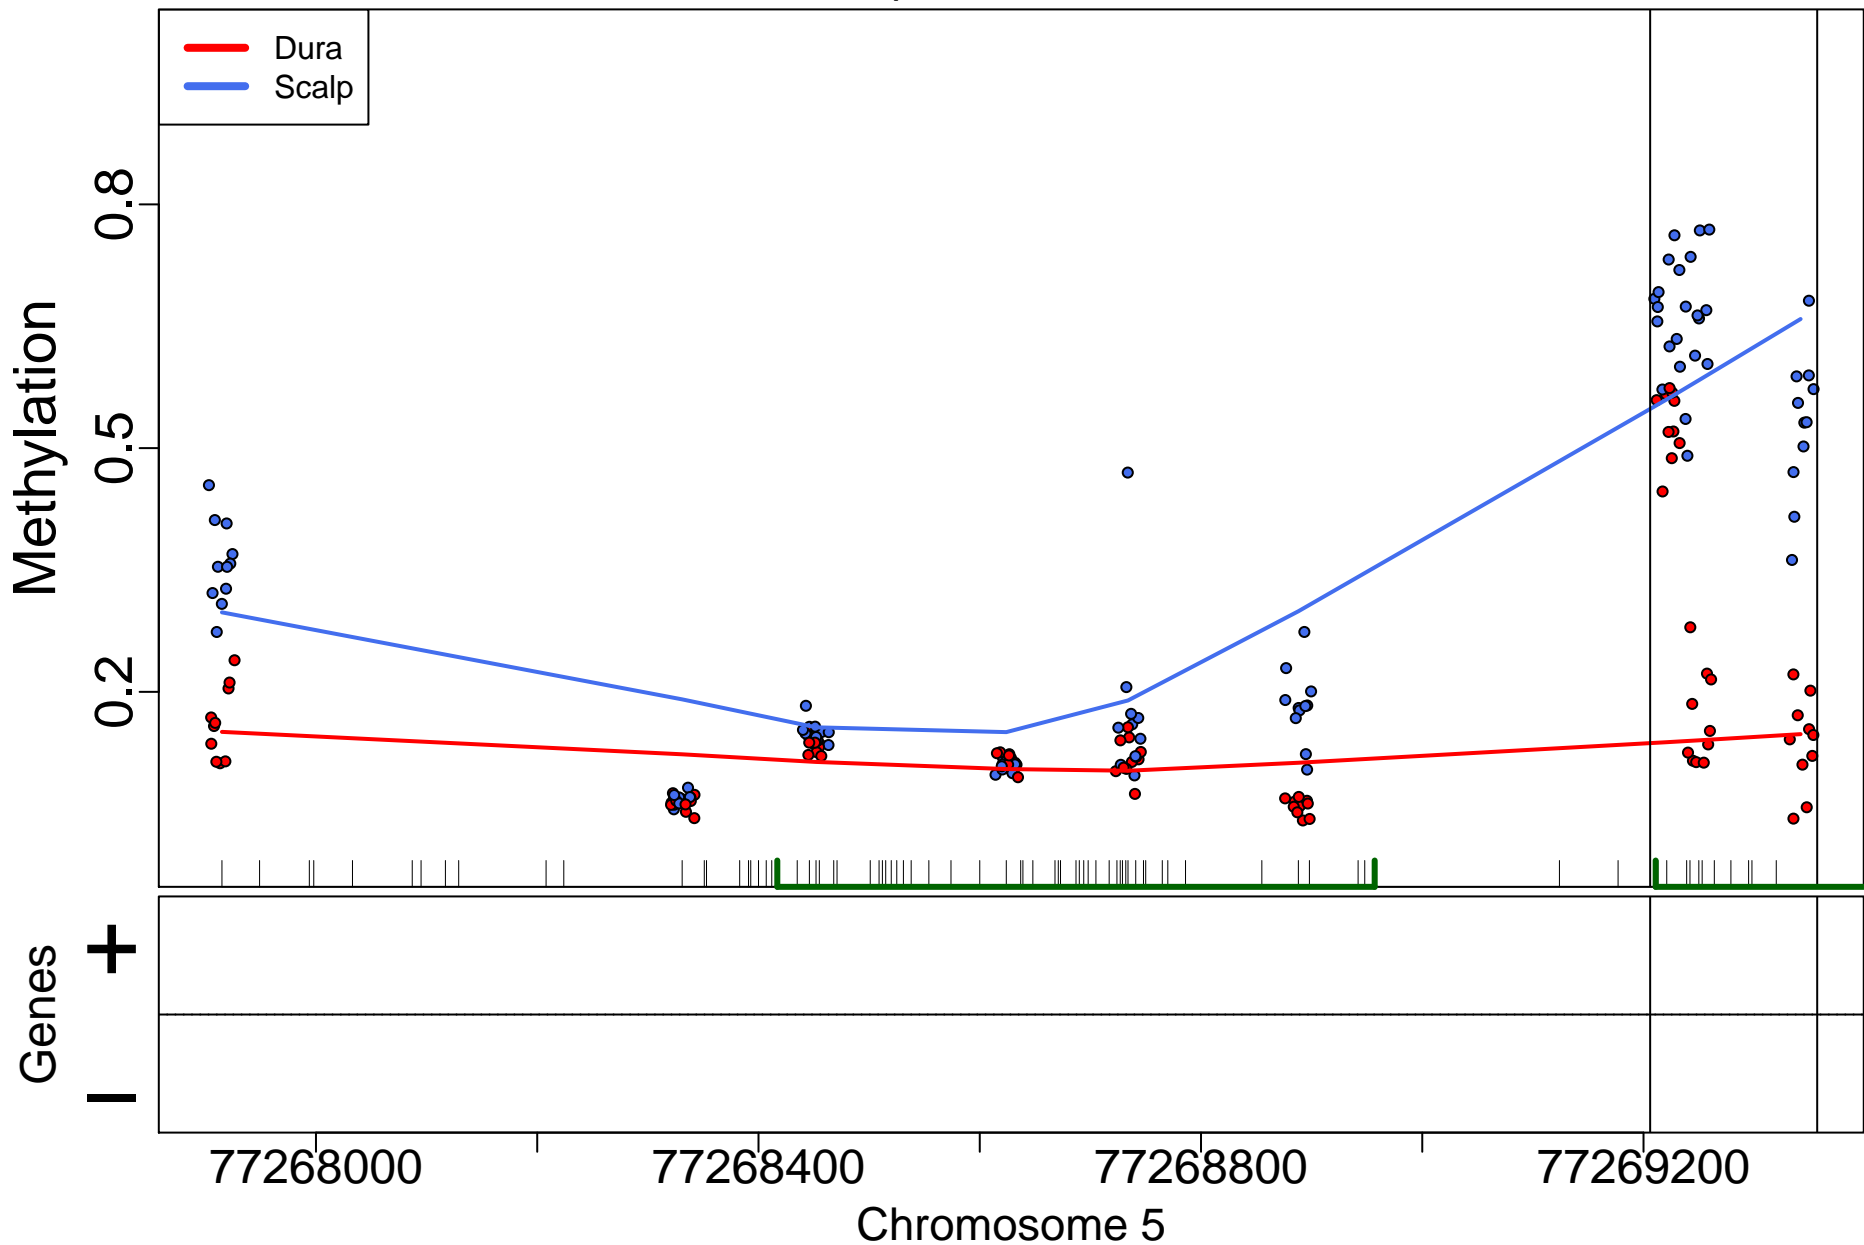

# ERRFI1; 1028bp from tss:promoter

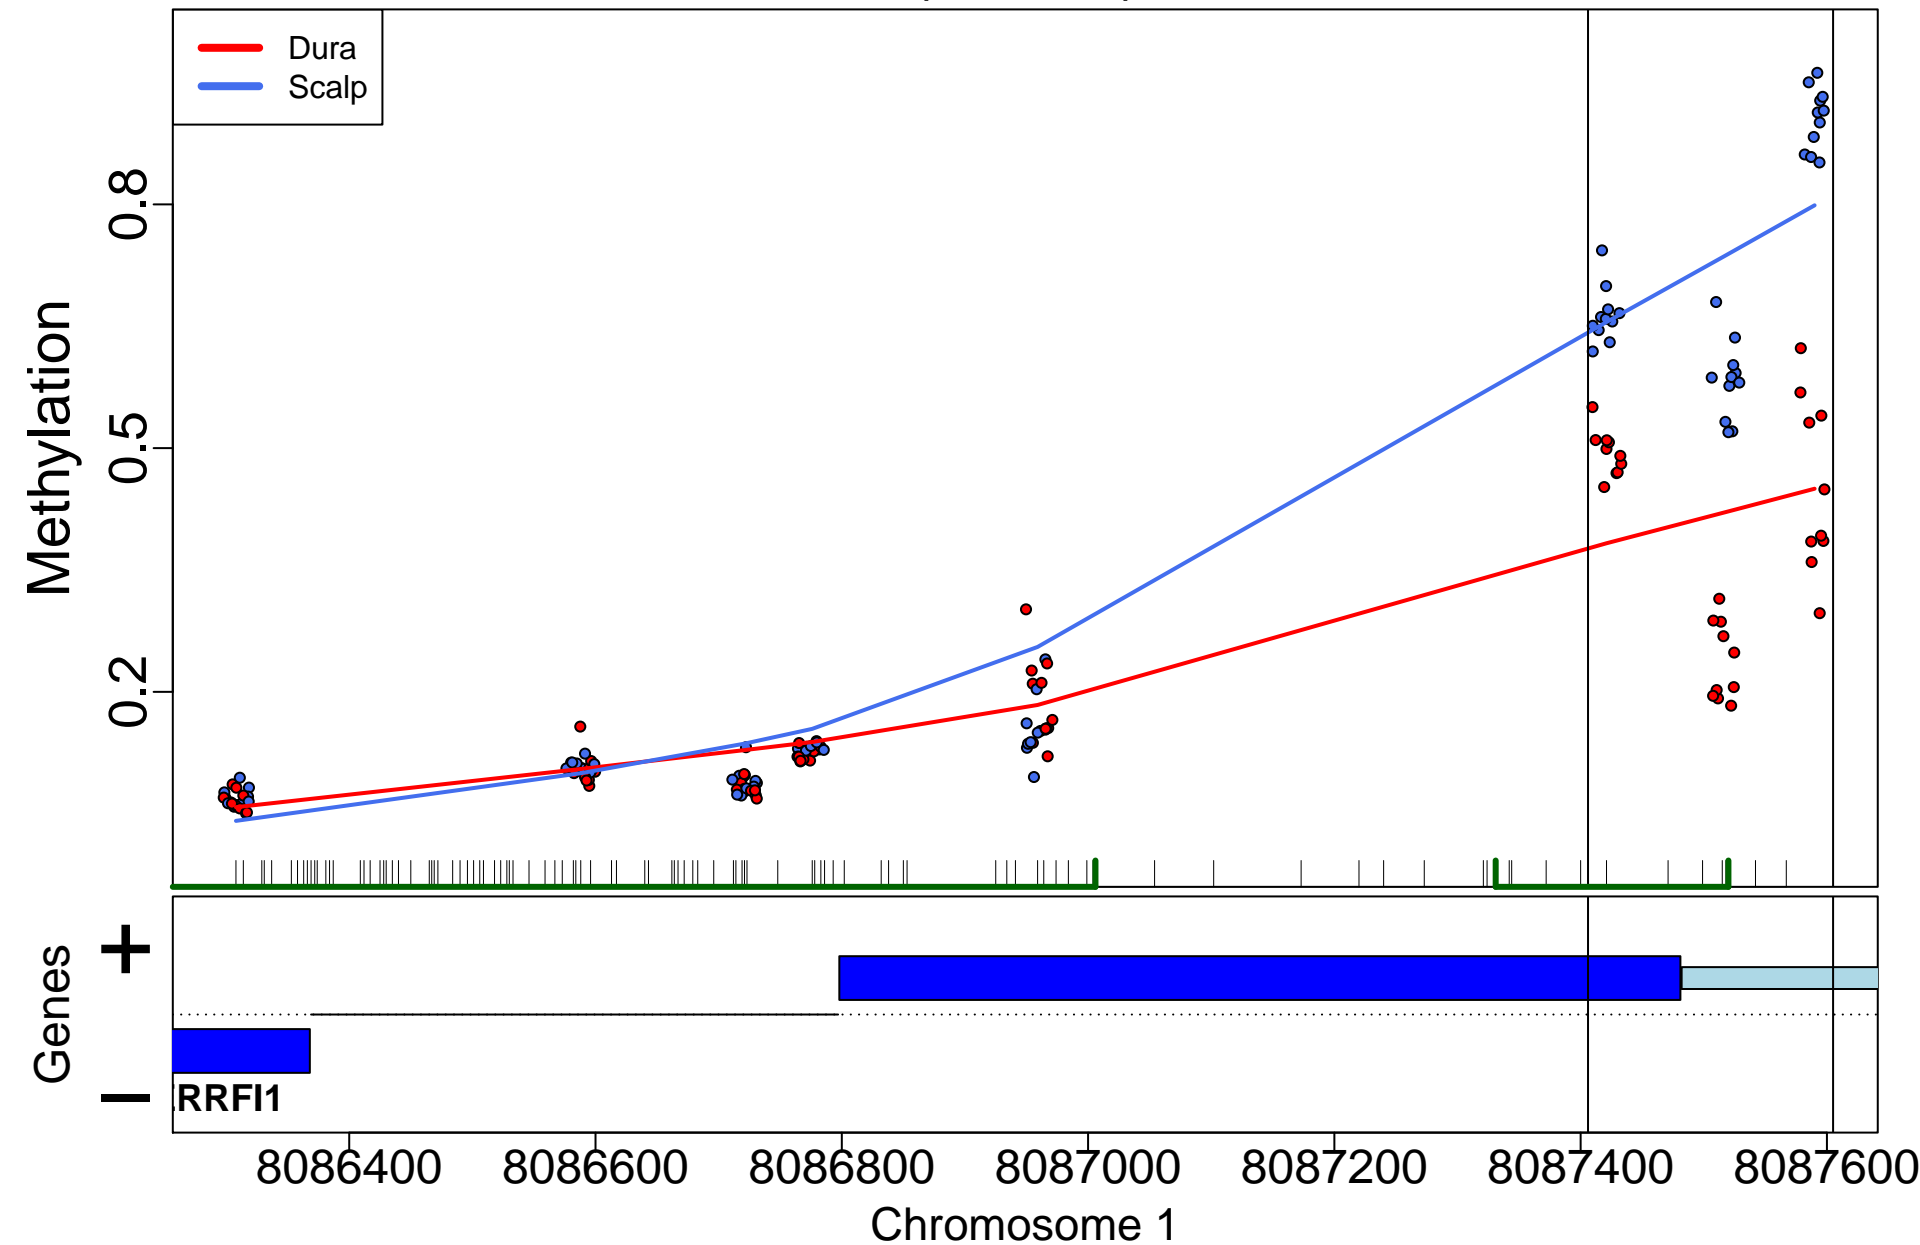

PROX1; 7038bp from tss:upstream

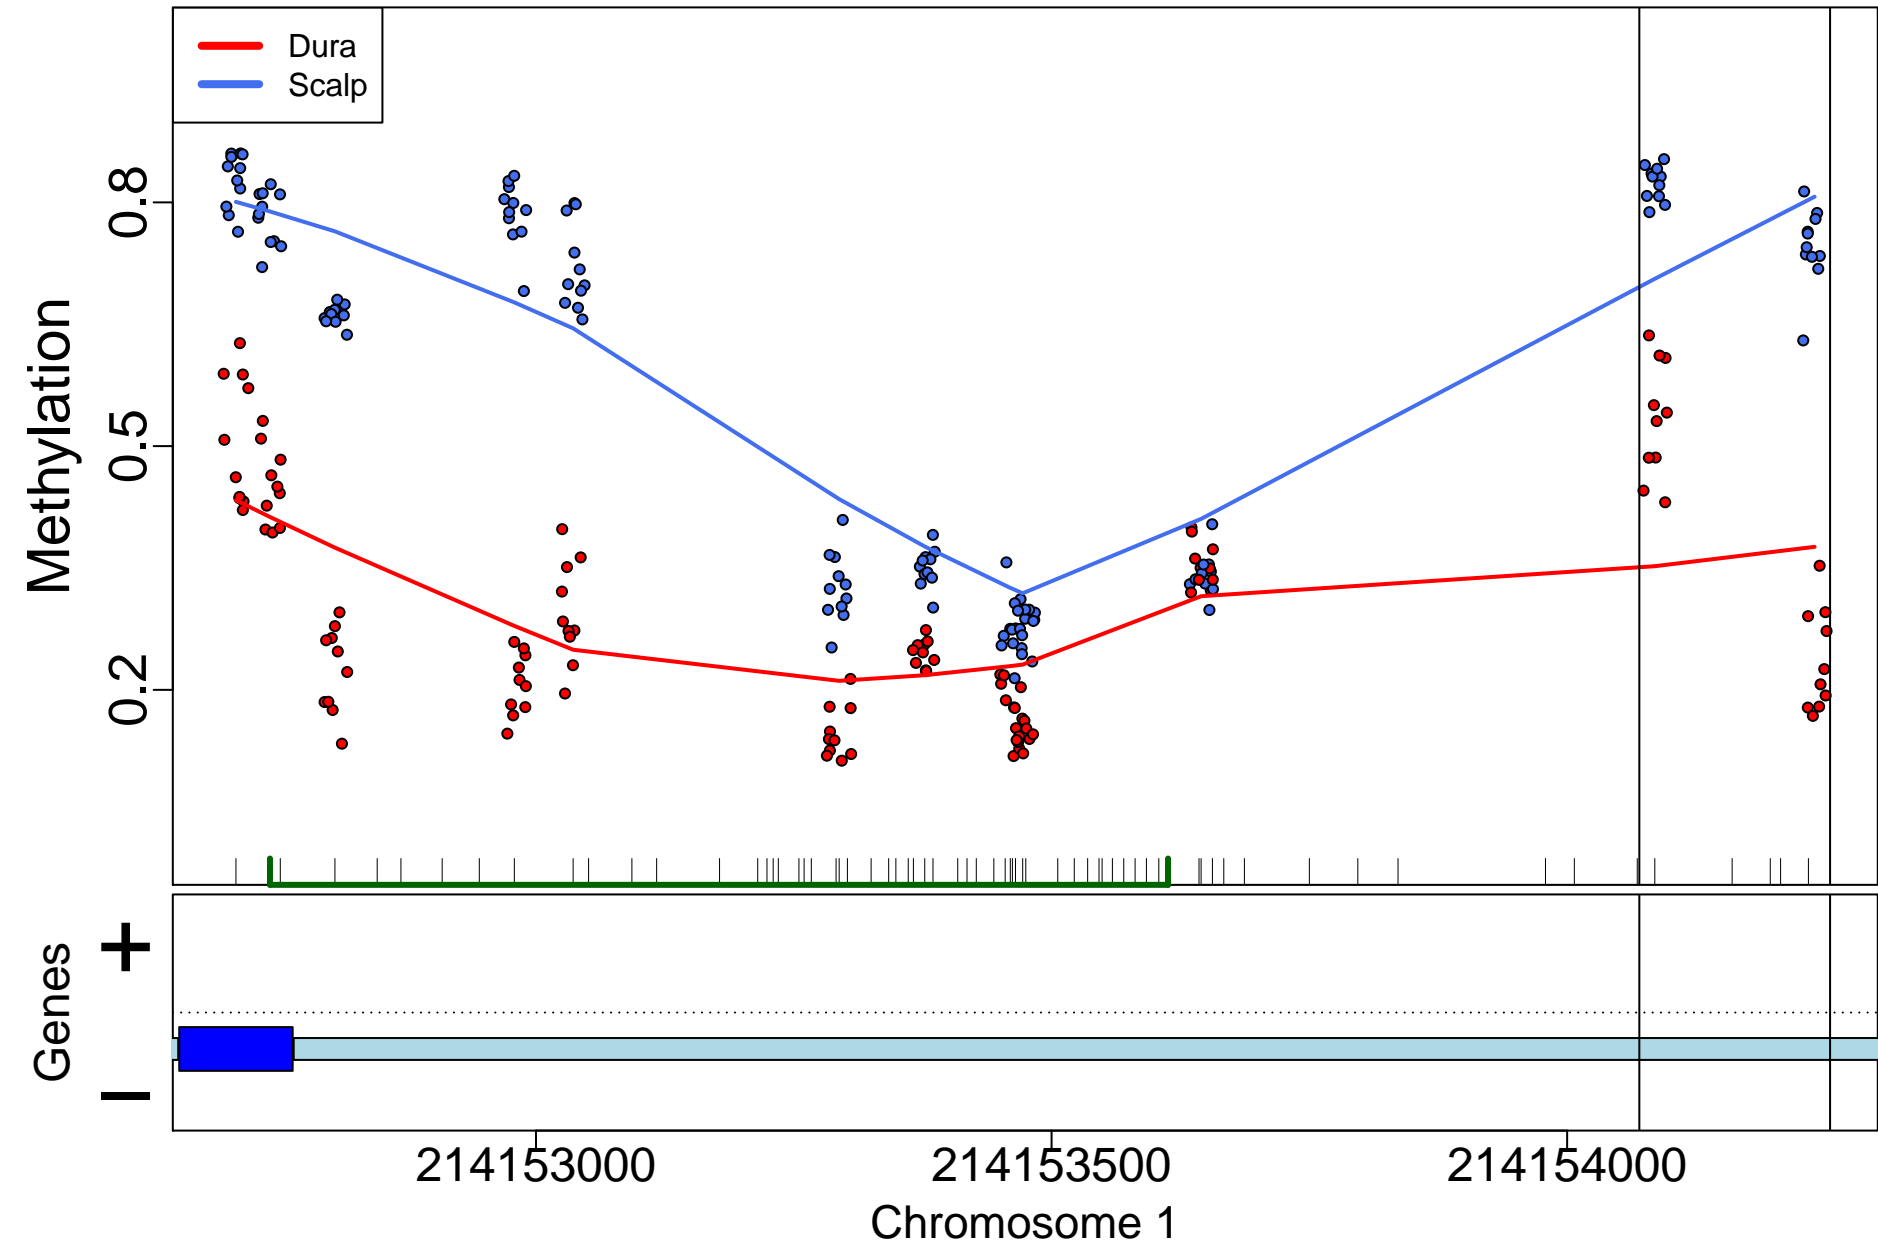

ZFH3; 9207bp from tss:inside intron

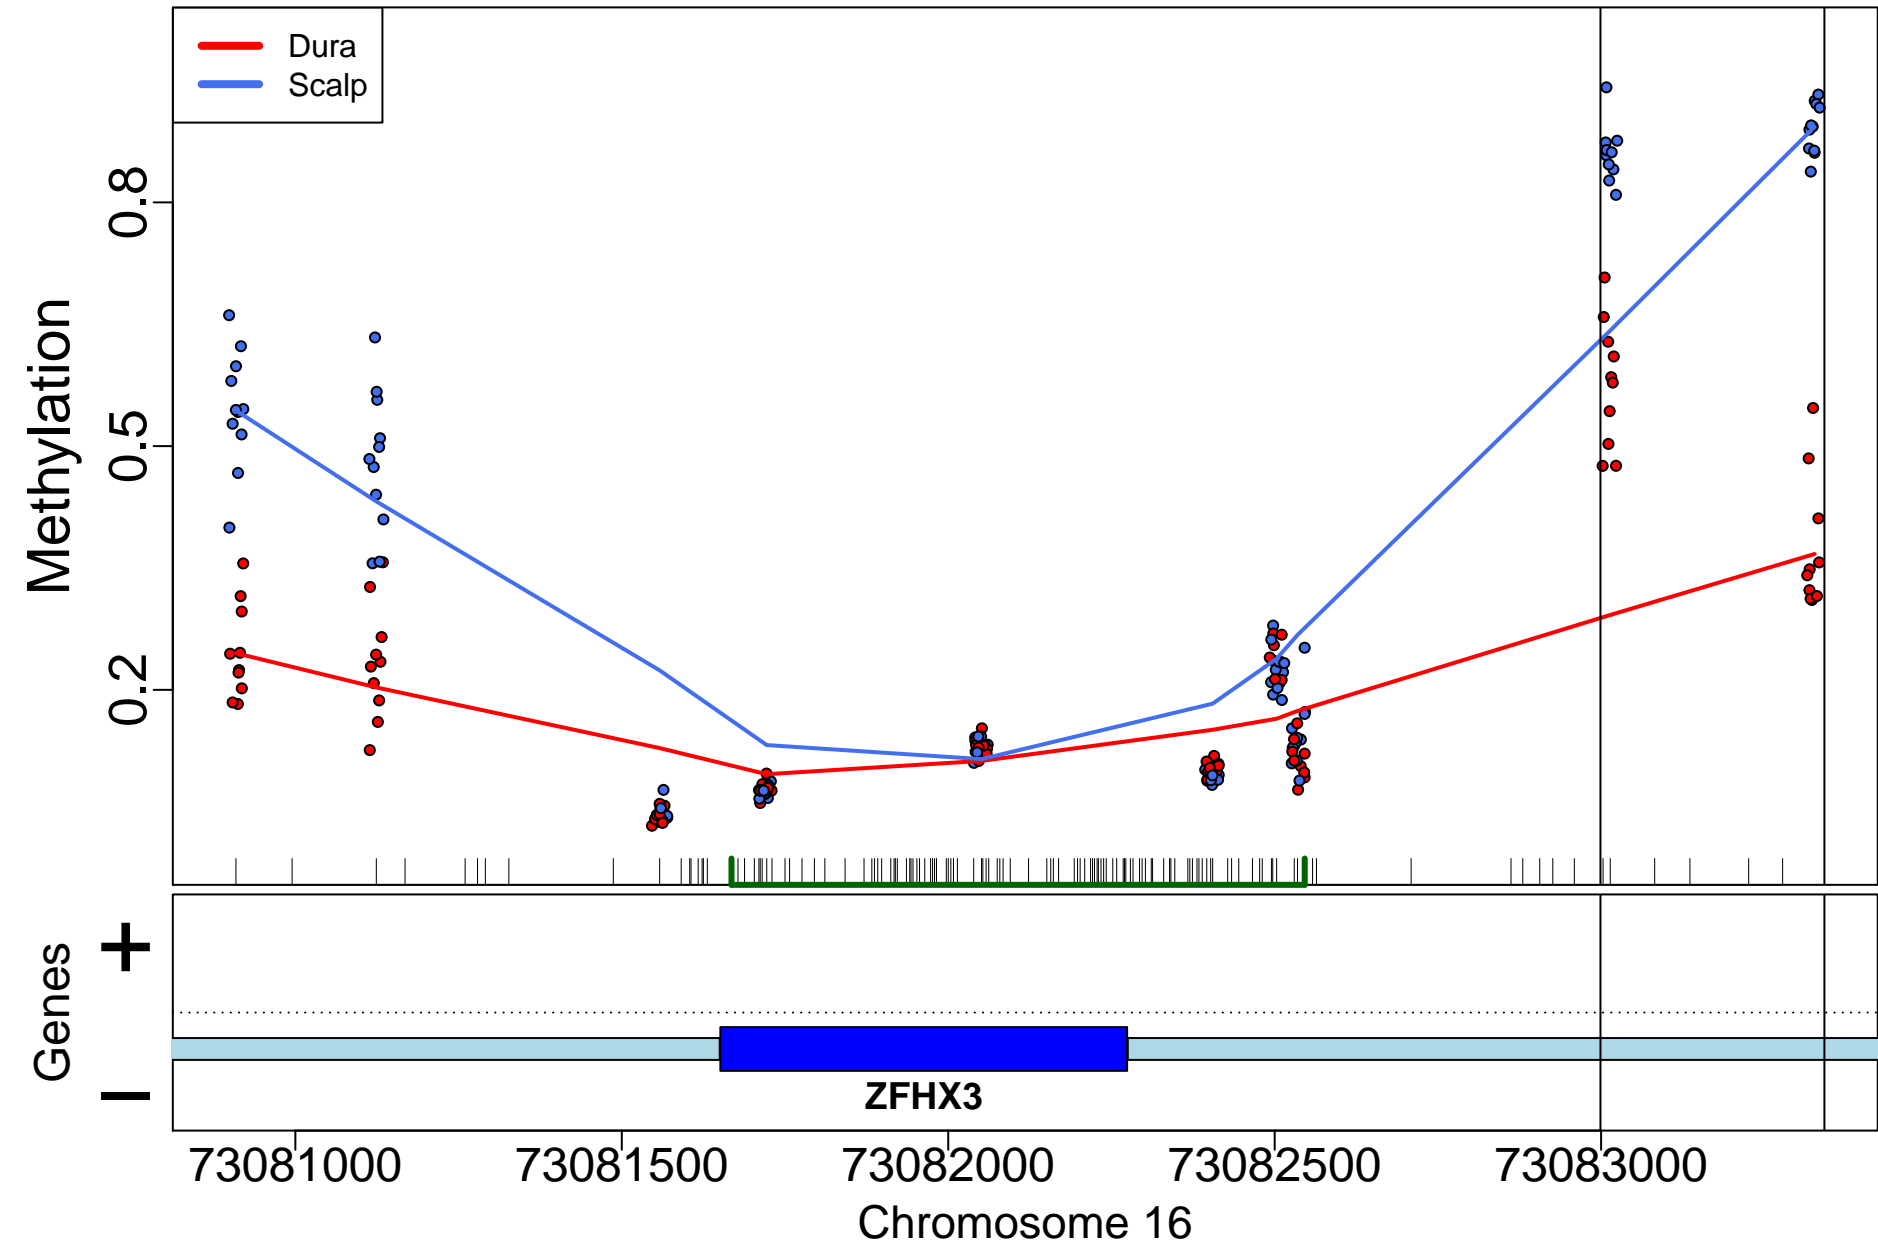

TRIM31; 0bp from tss:NA

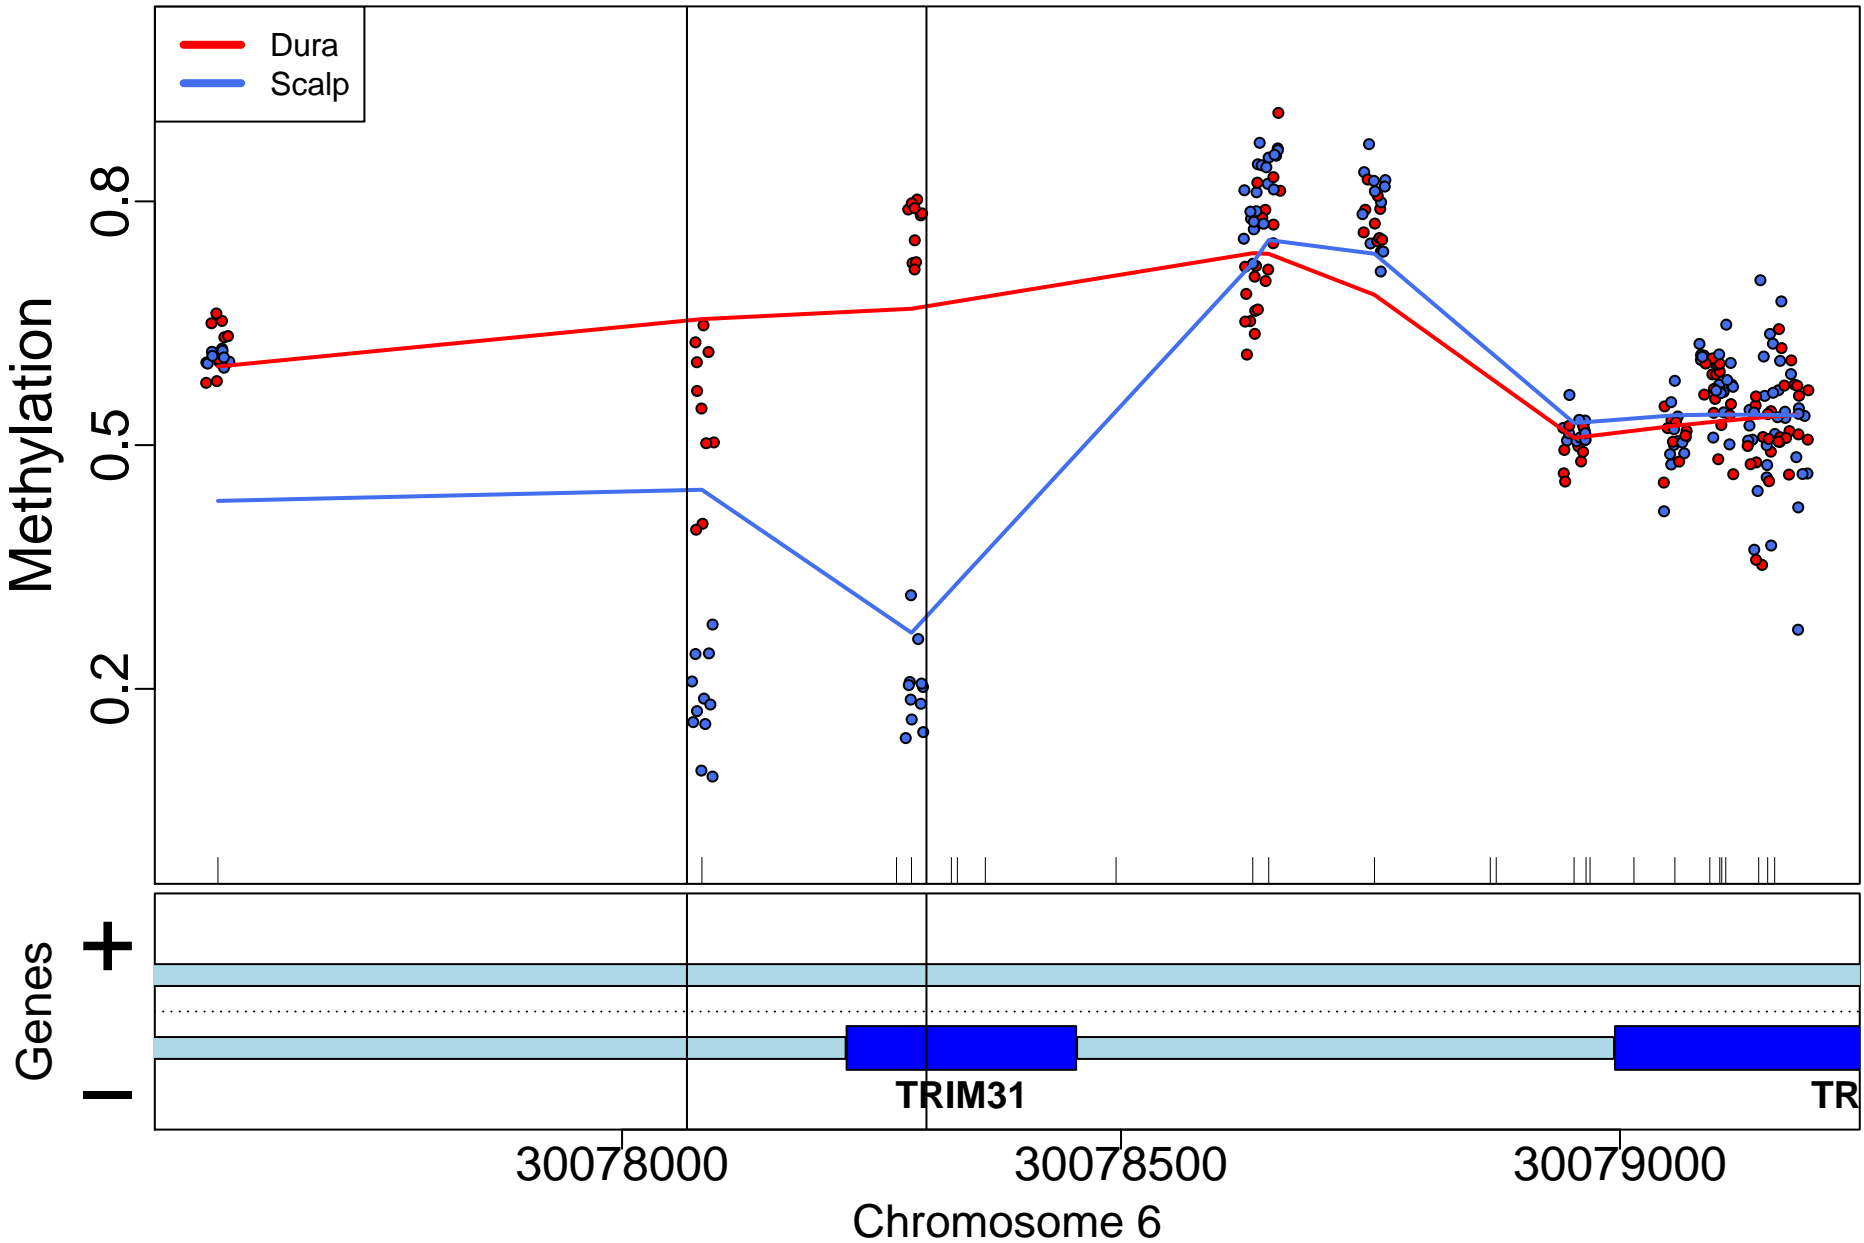

NT5C2; 545bp from tss:promoter

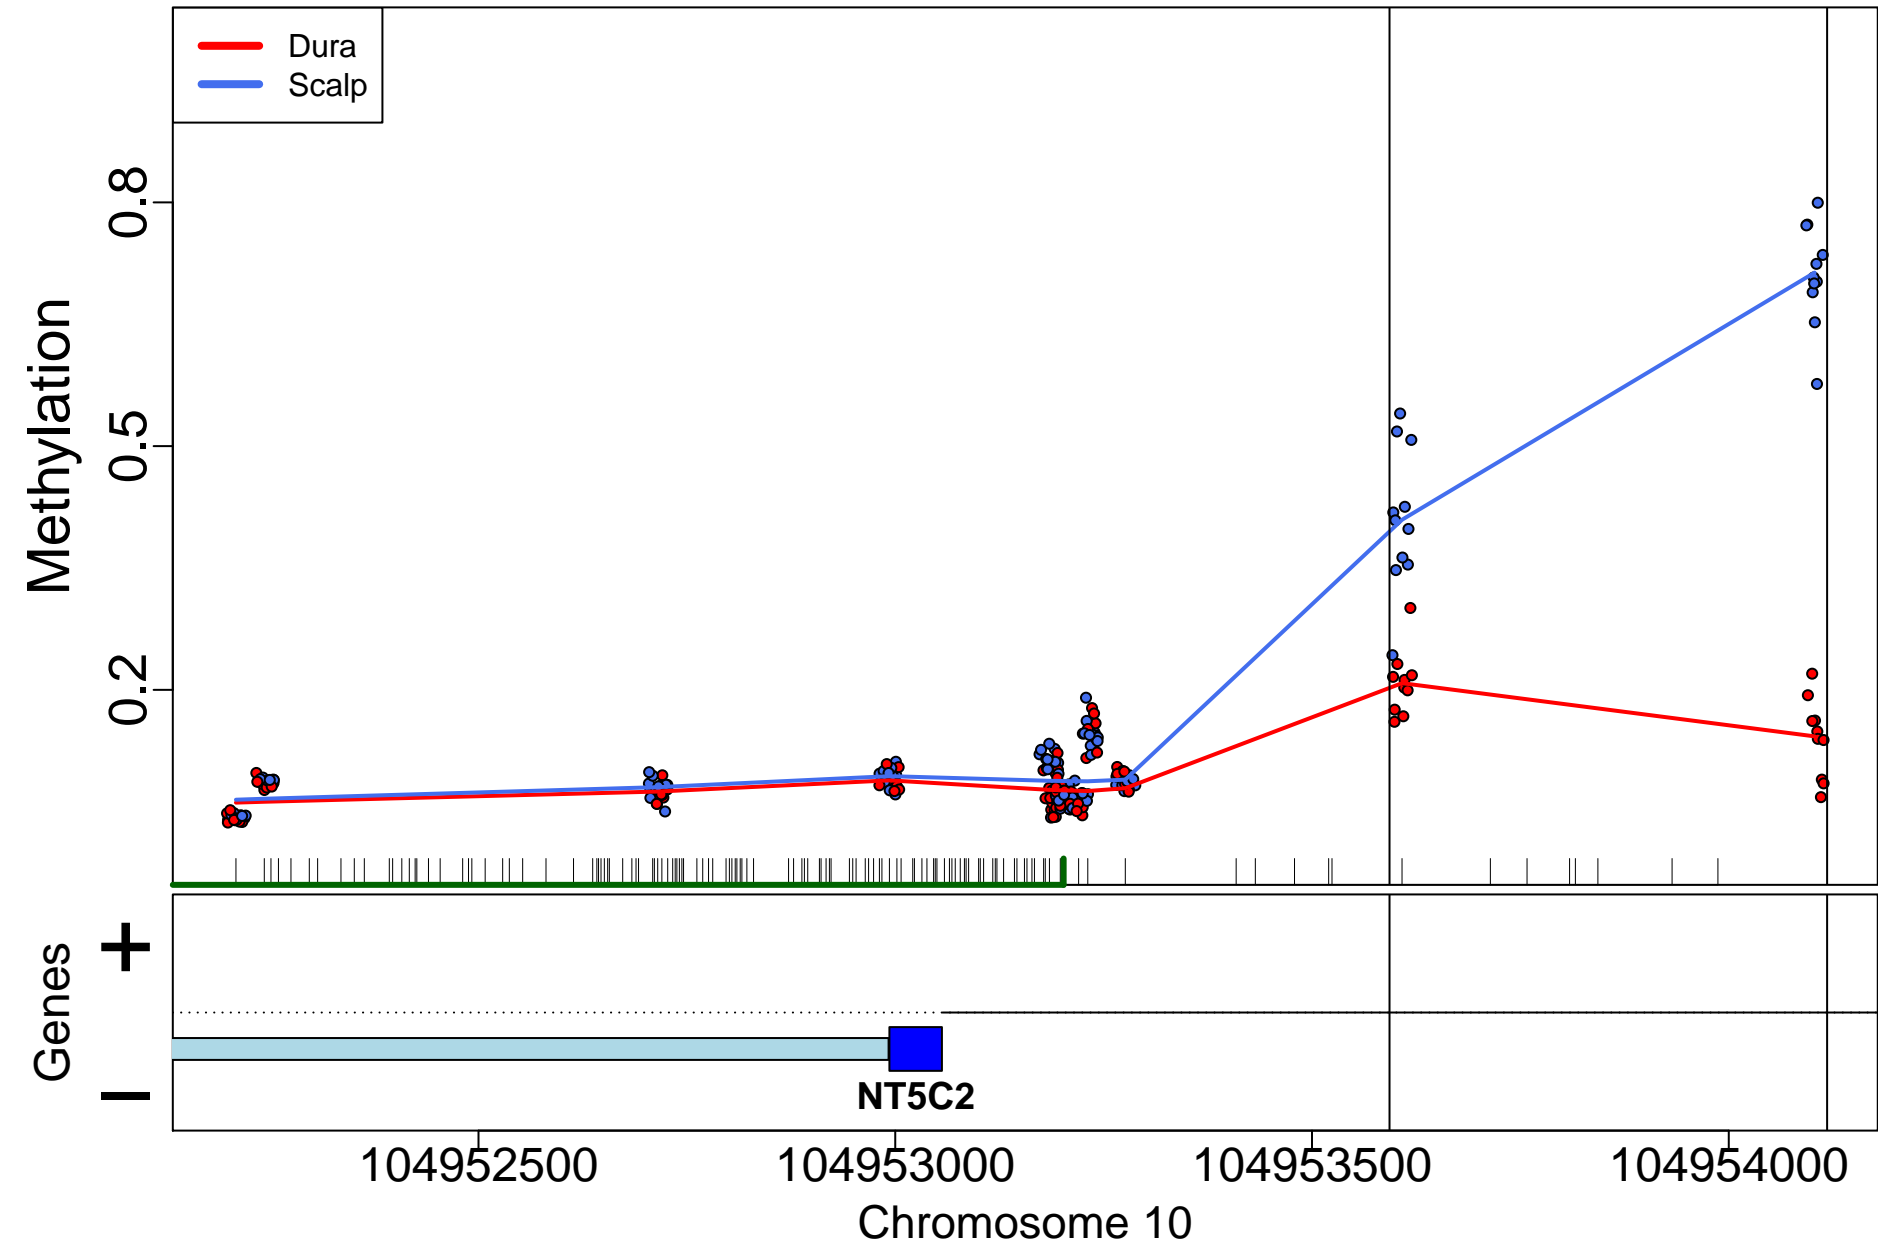



T; 70179bp from tss:downstream

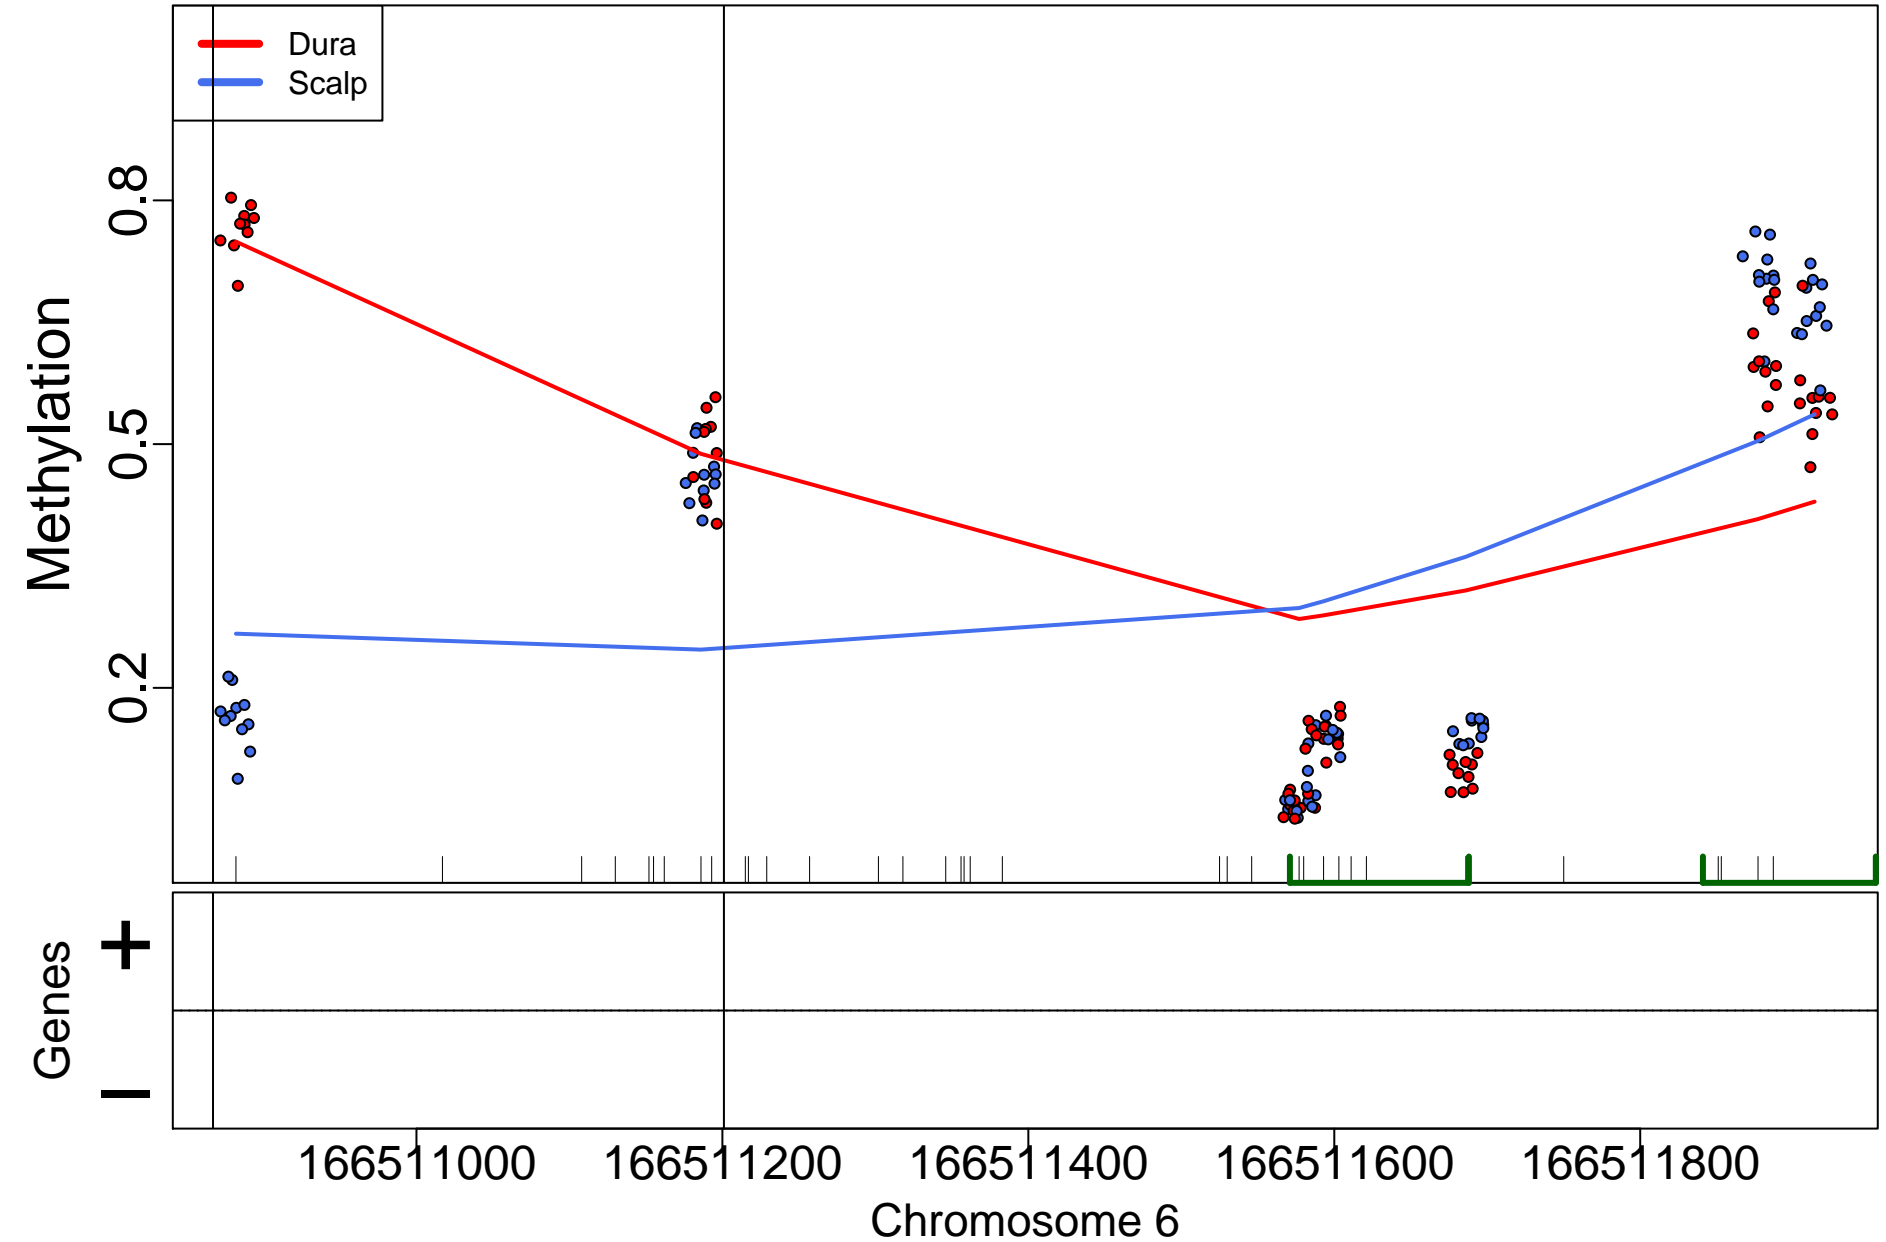

LINC01158; 0bp from tss:NA

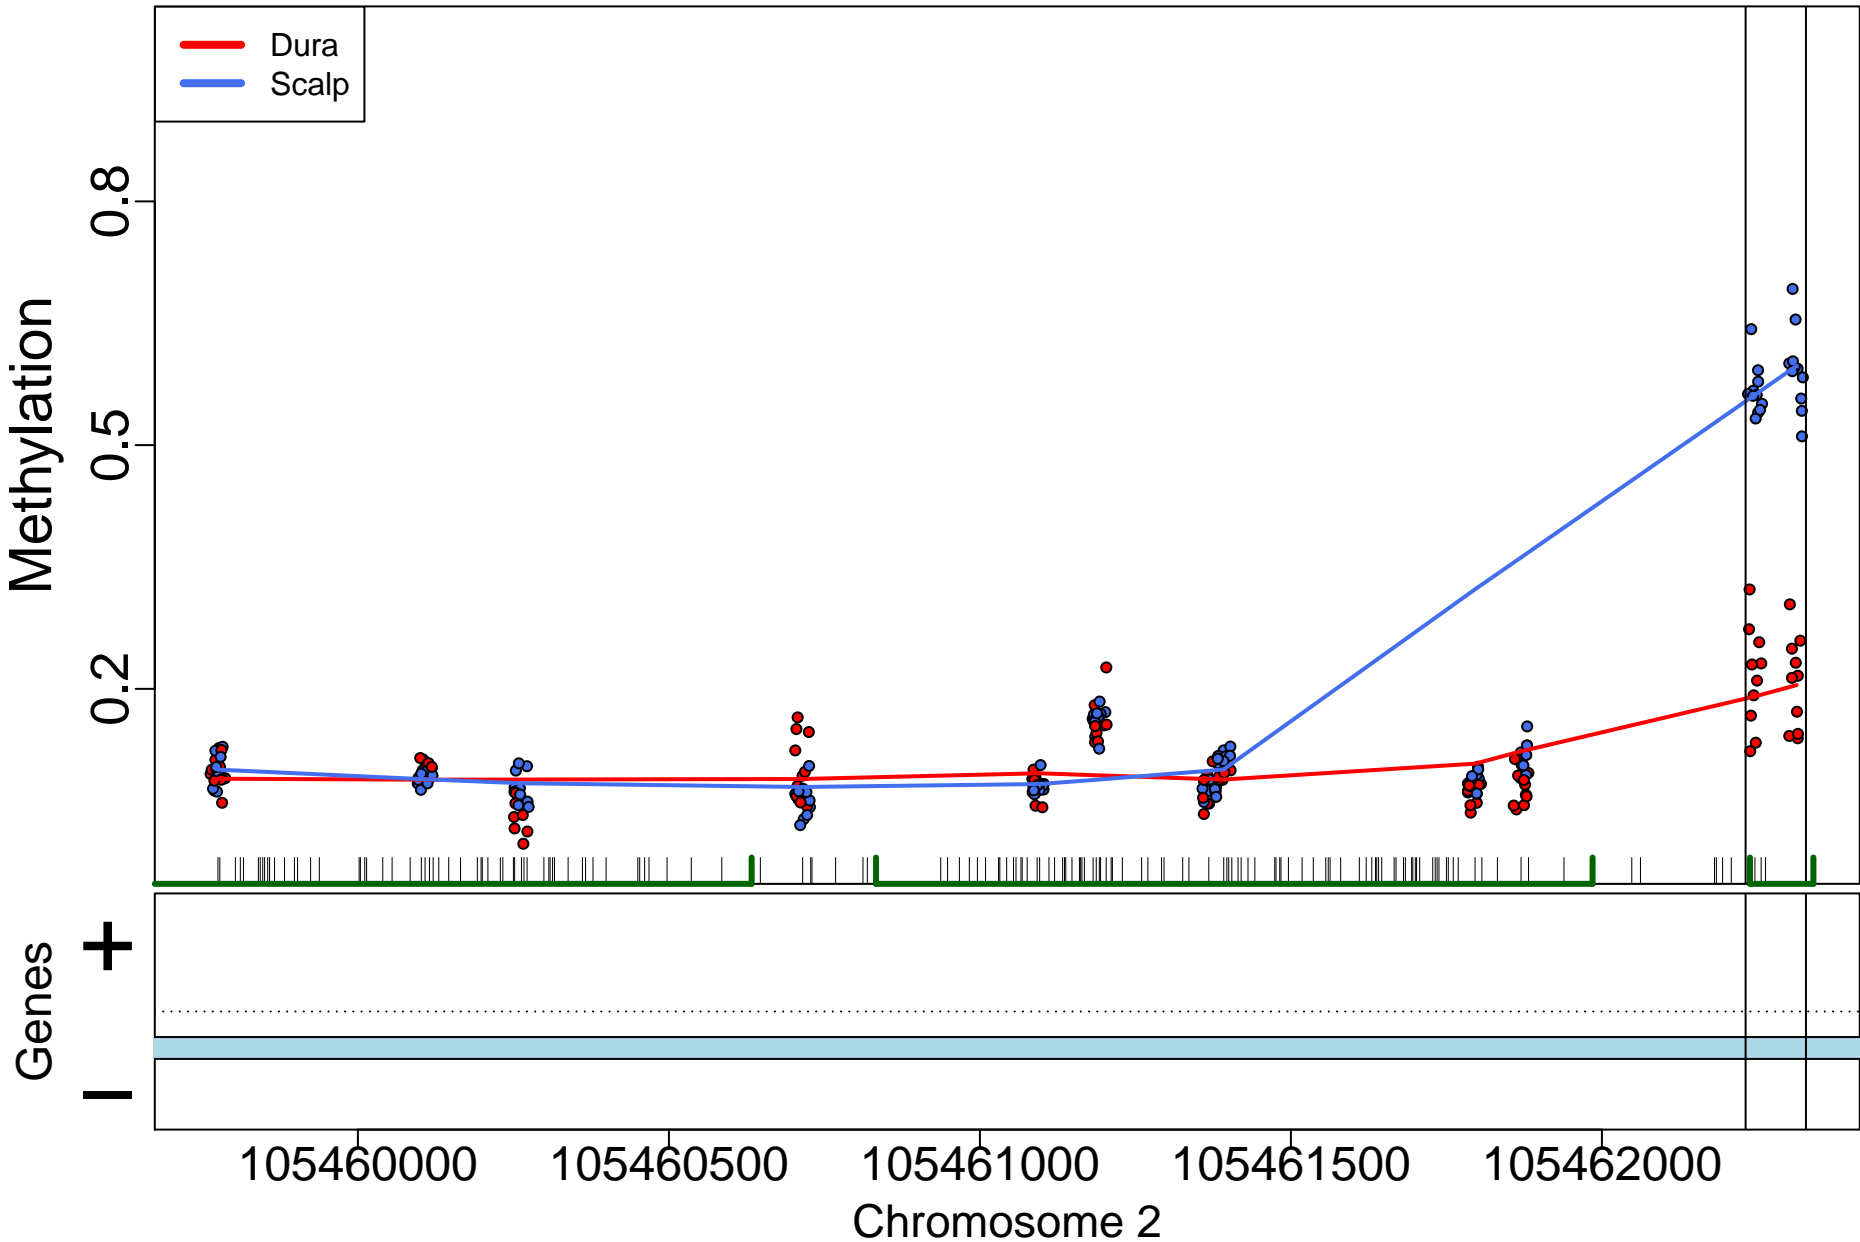

ZFHx4-AS1; 0bp from tss:NA

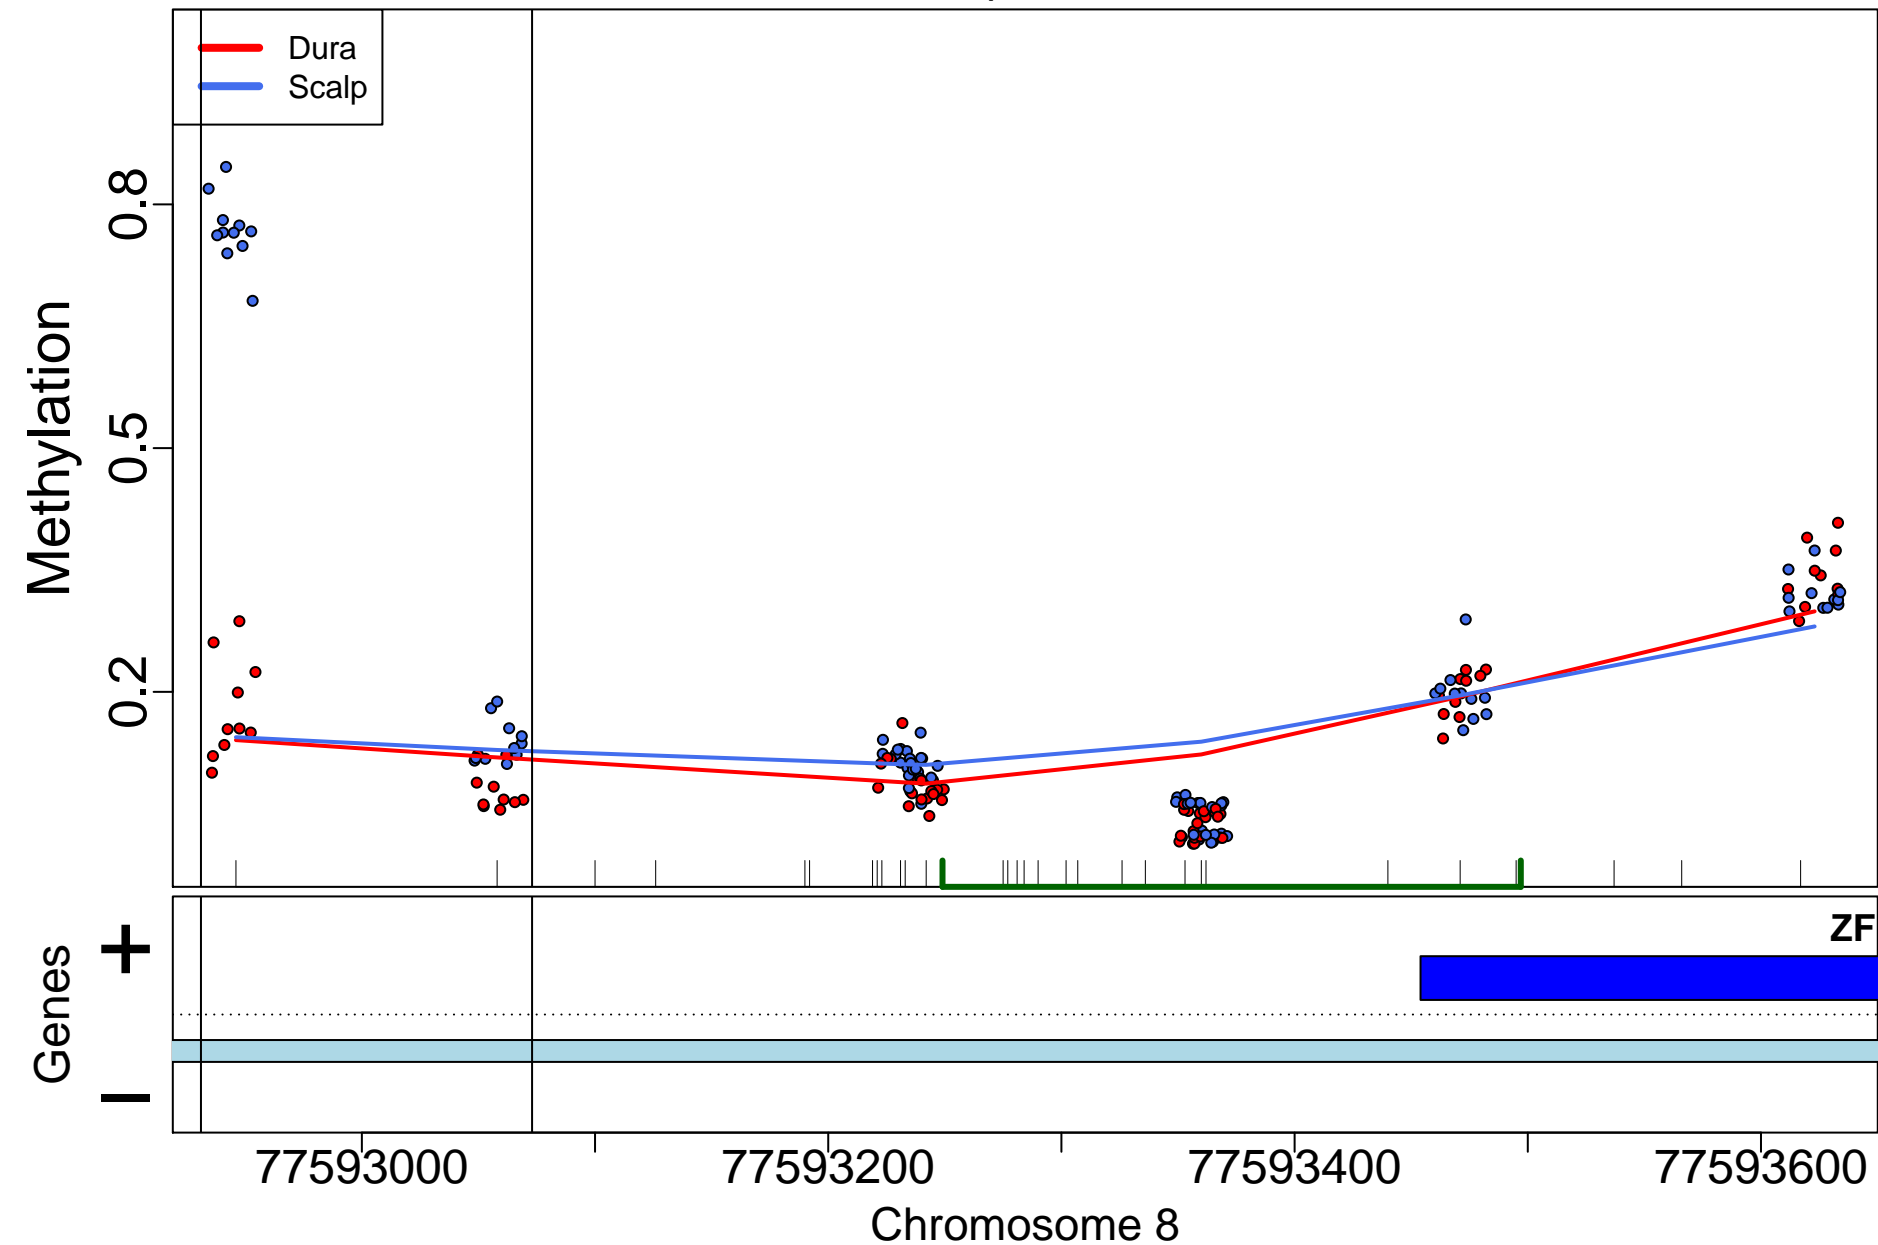

ALG9; 7383bp from tss:inside intron

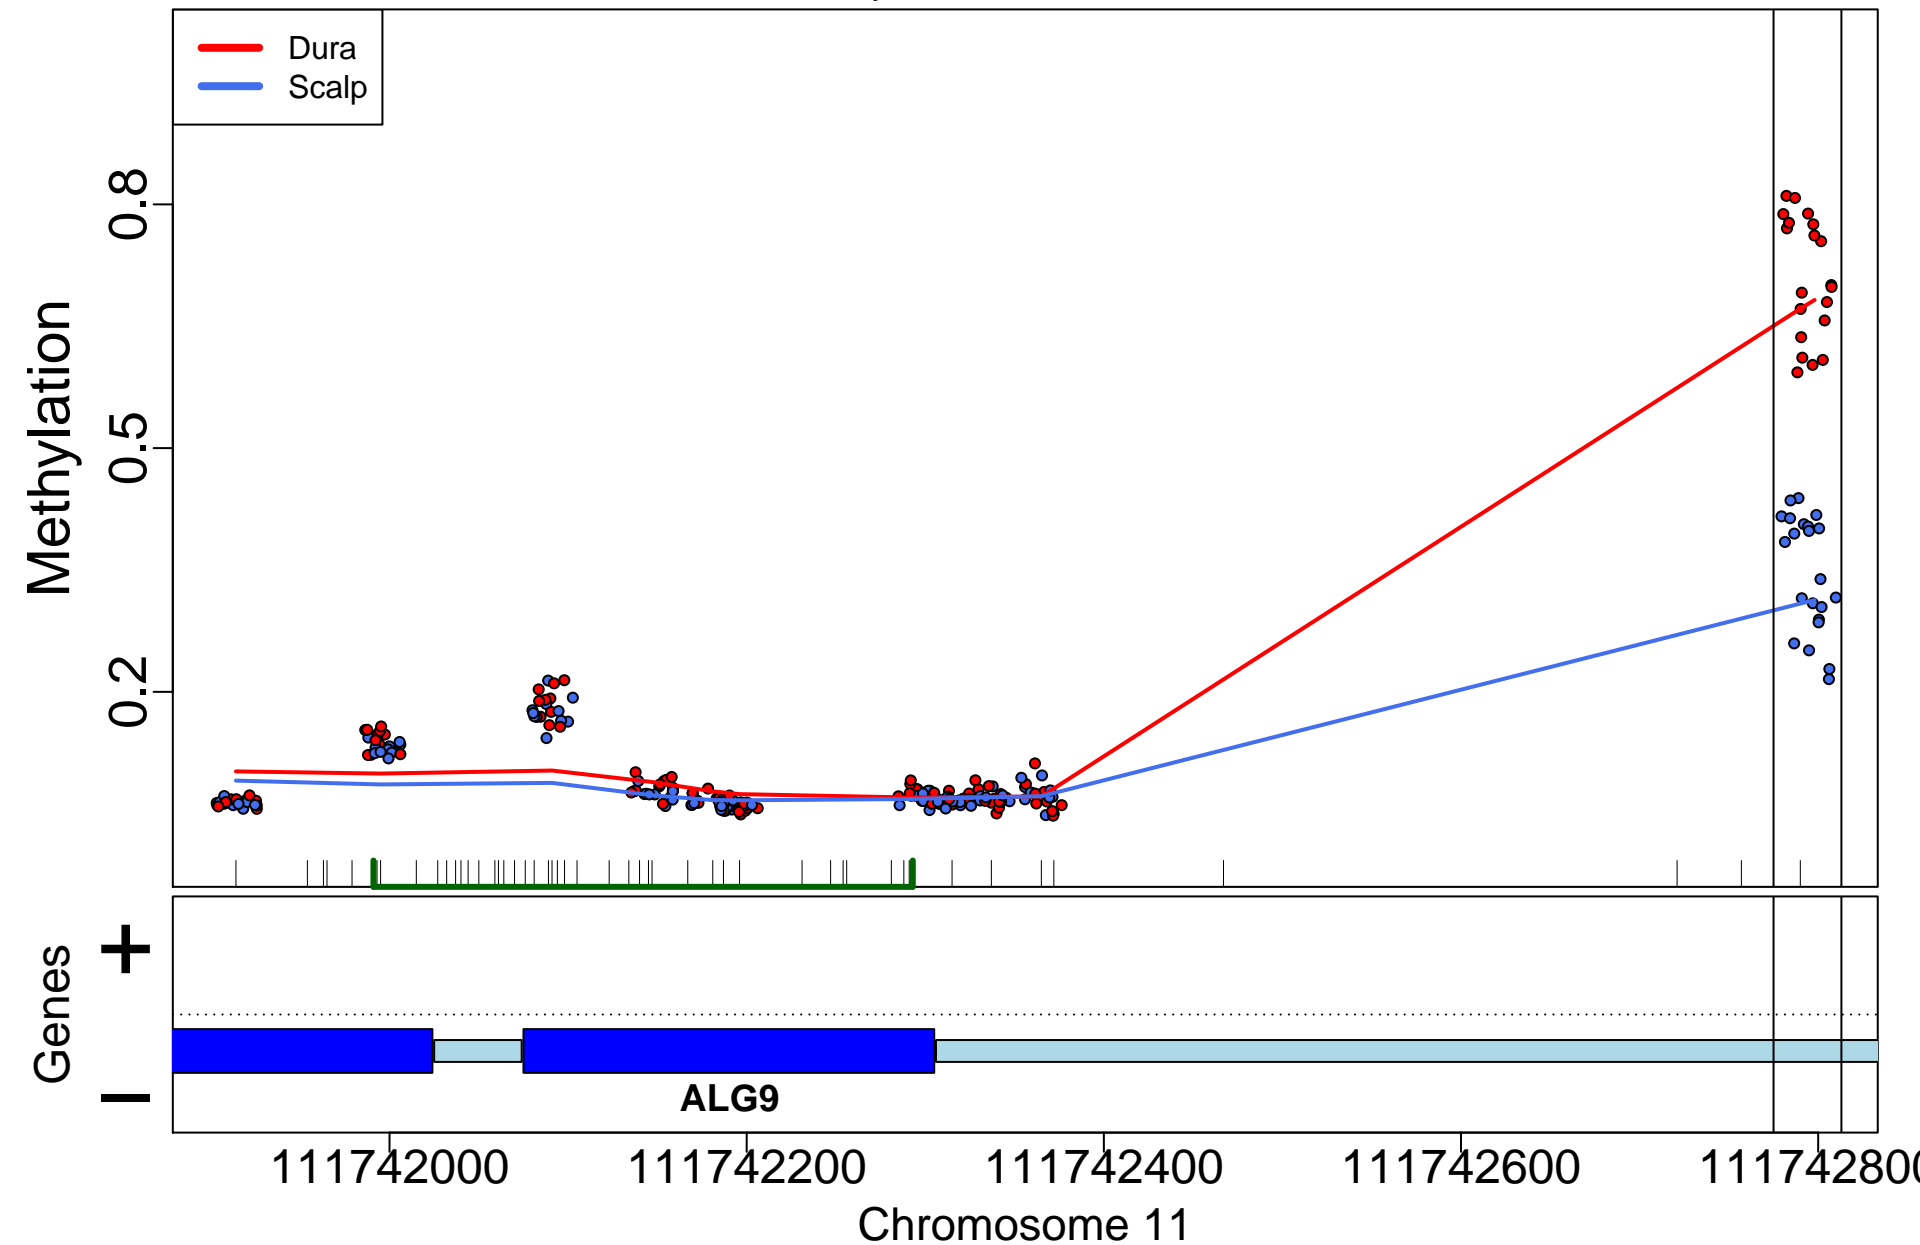

LINC01124; 704bp from tss:inside exon

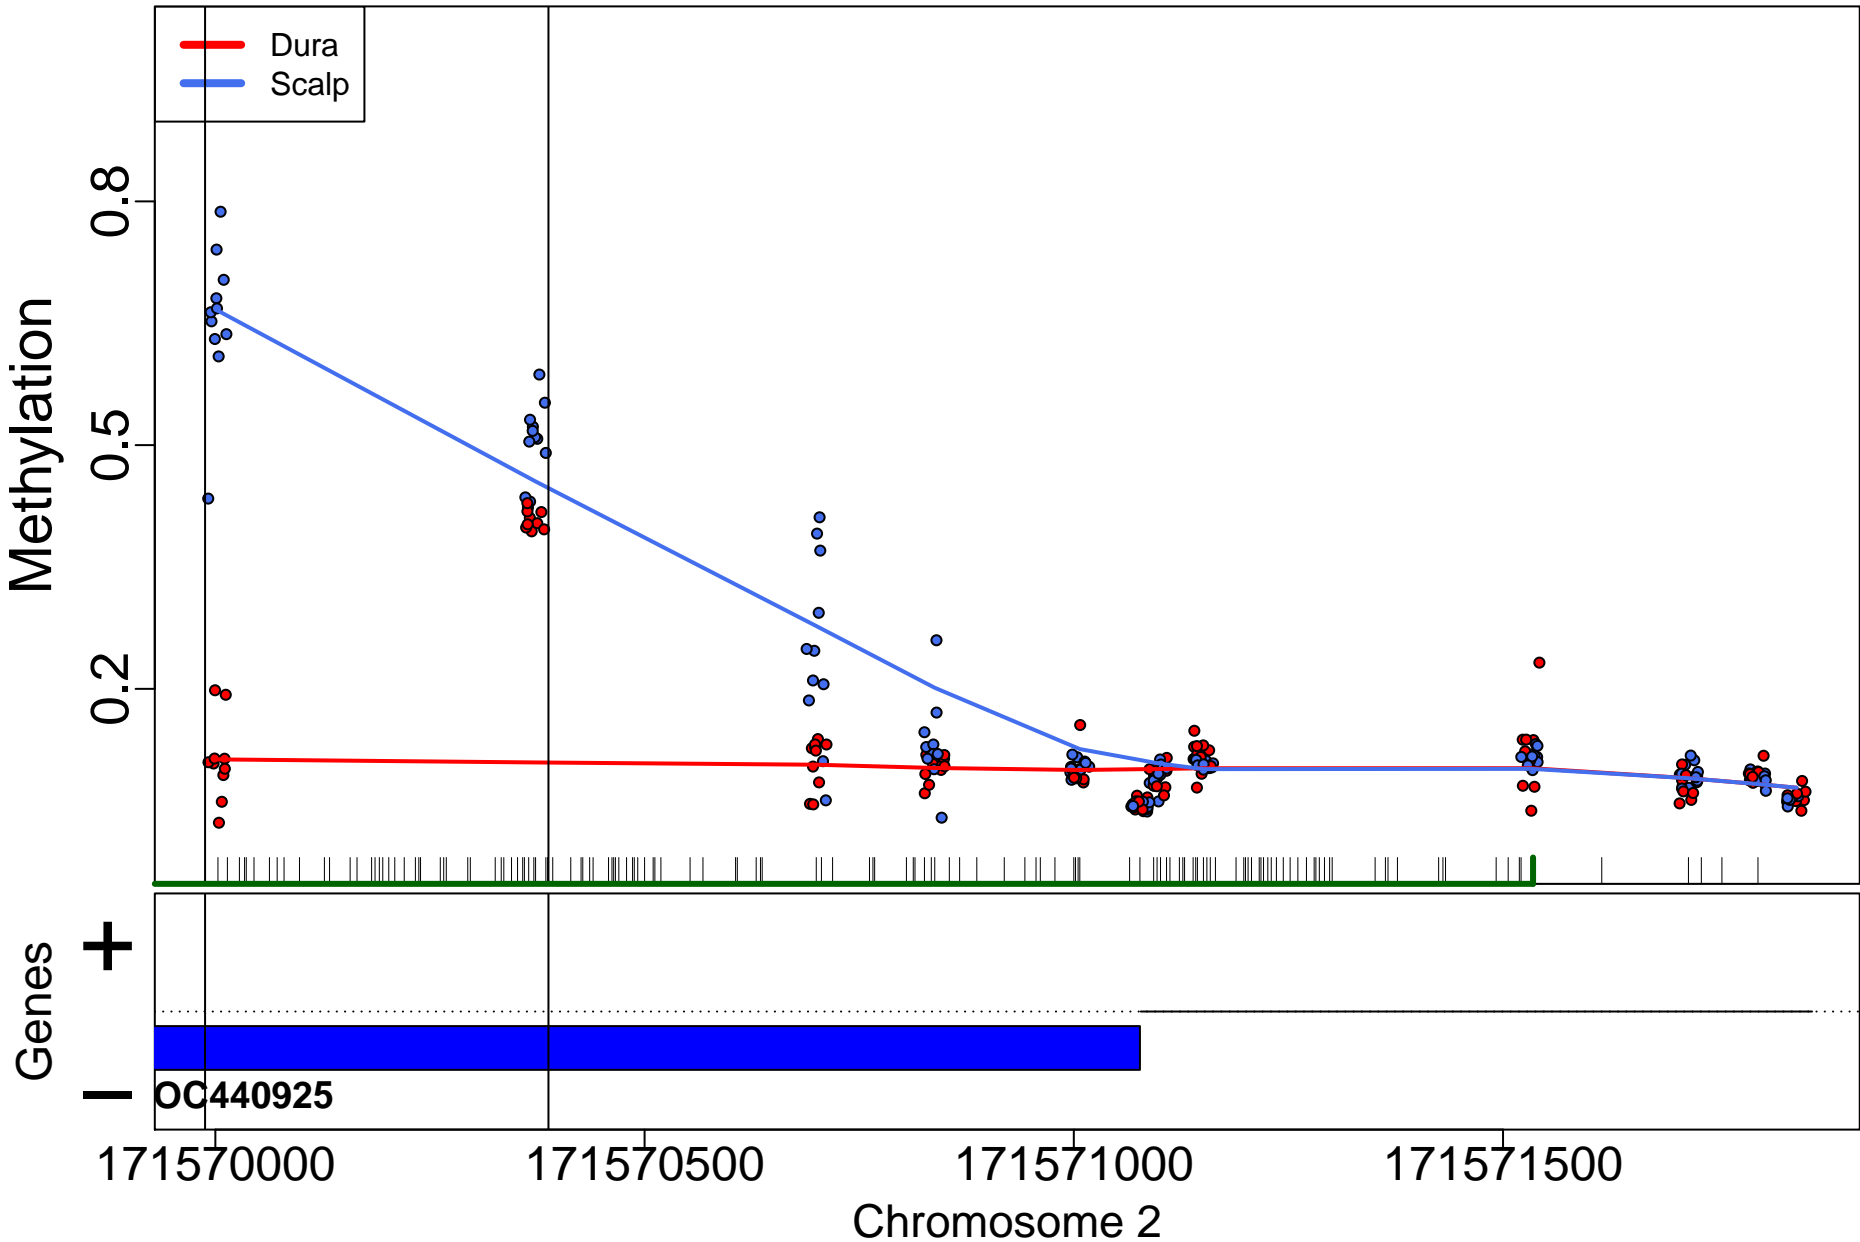

# SMURF1; 655bp from tss:promoter

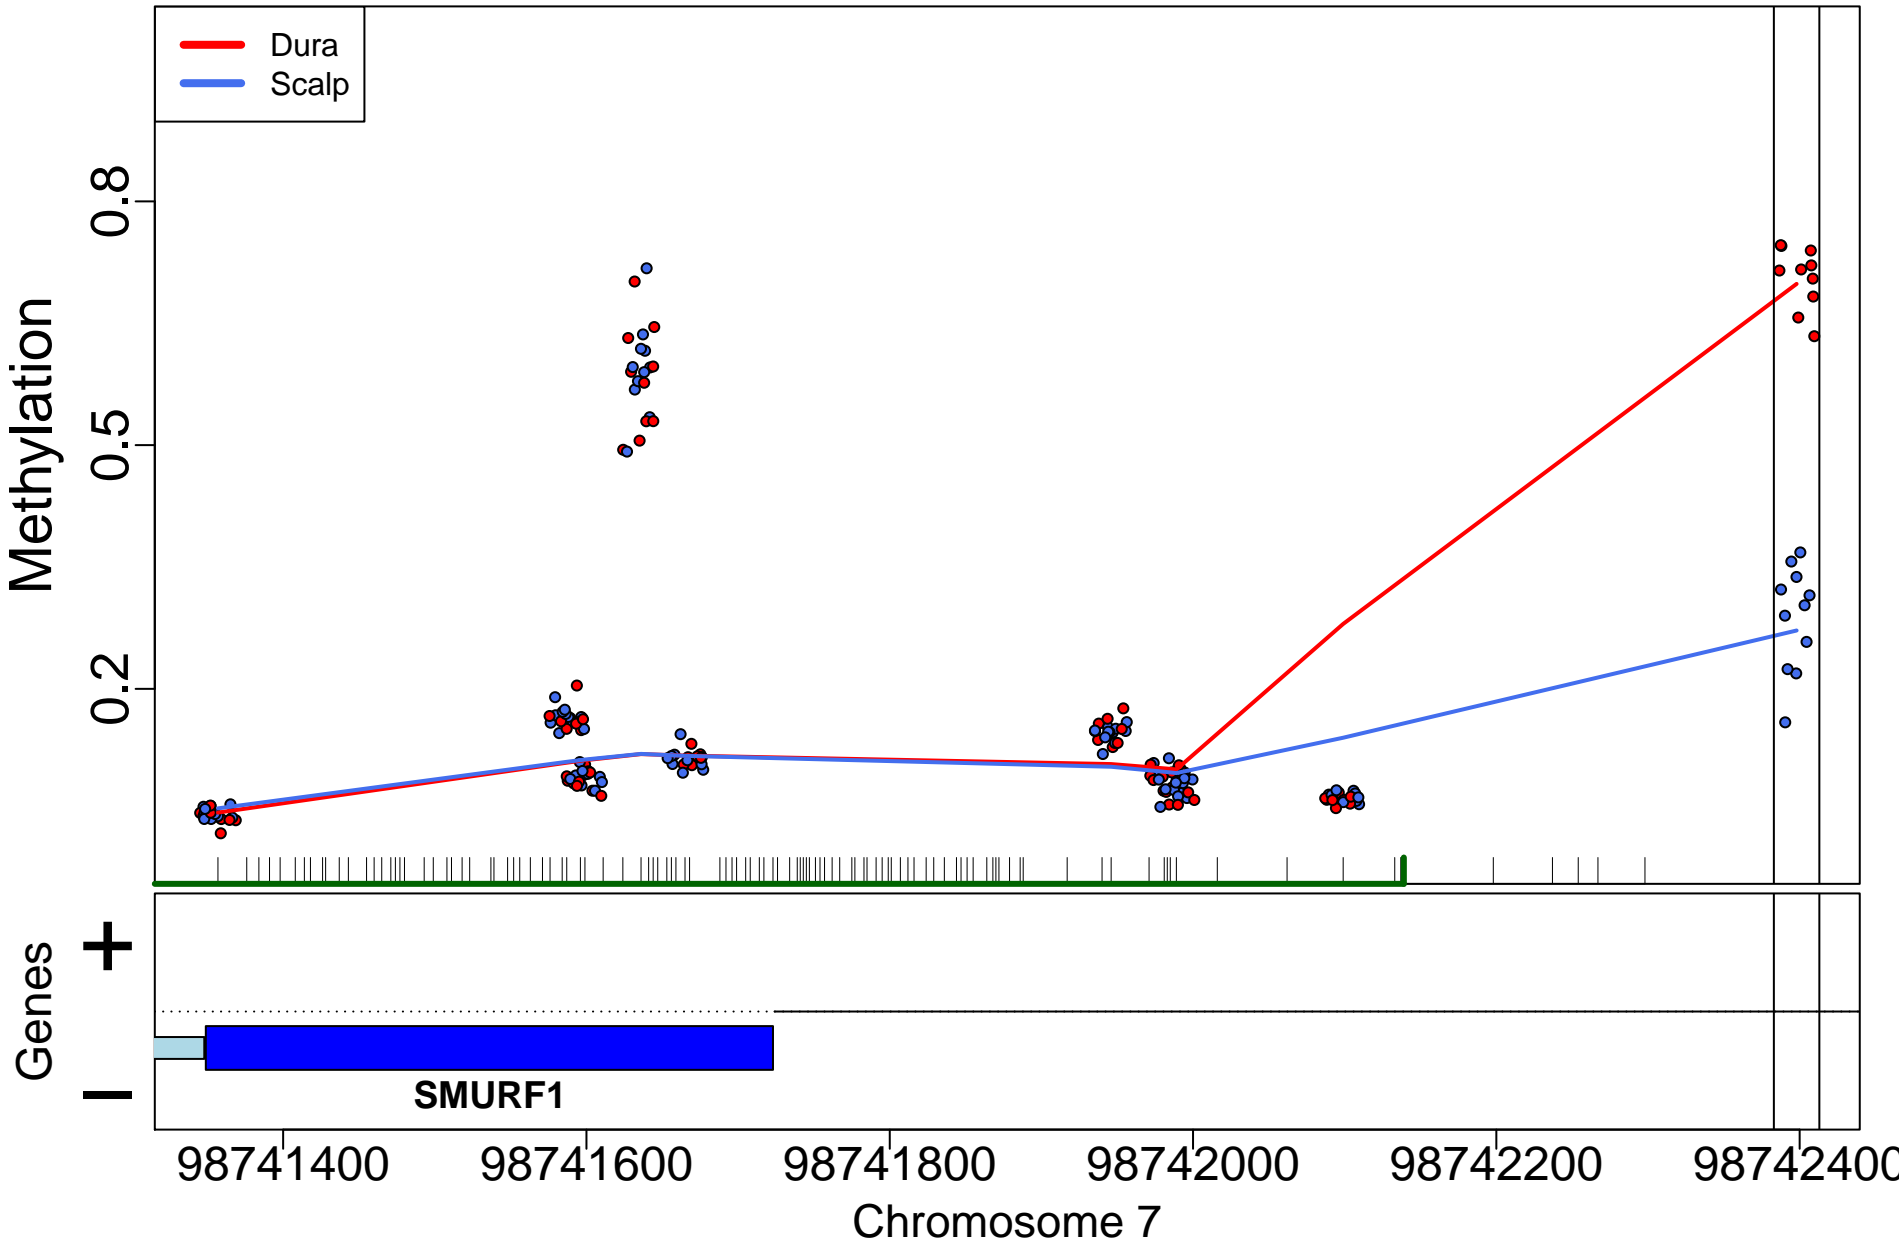

TMEM174; 43418bp from tss:downstream

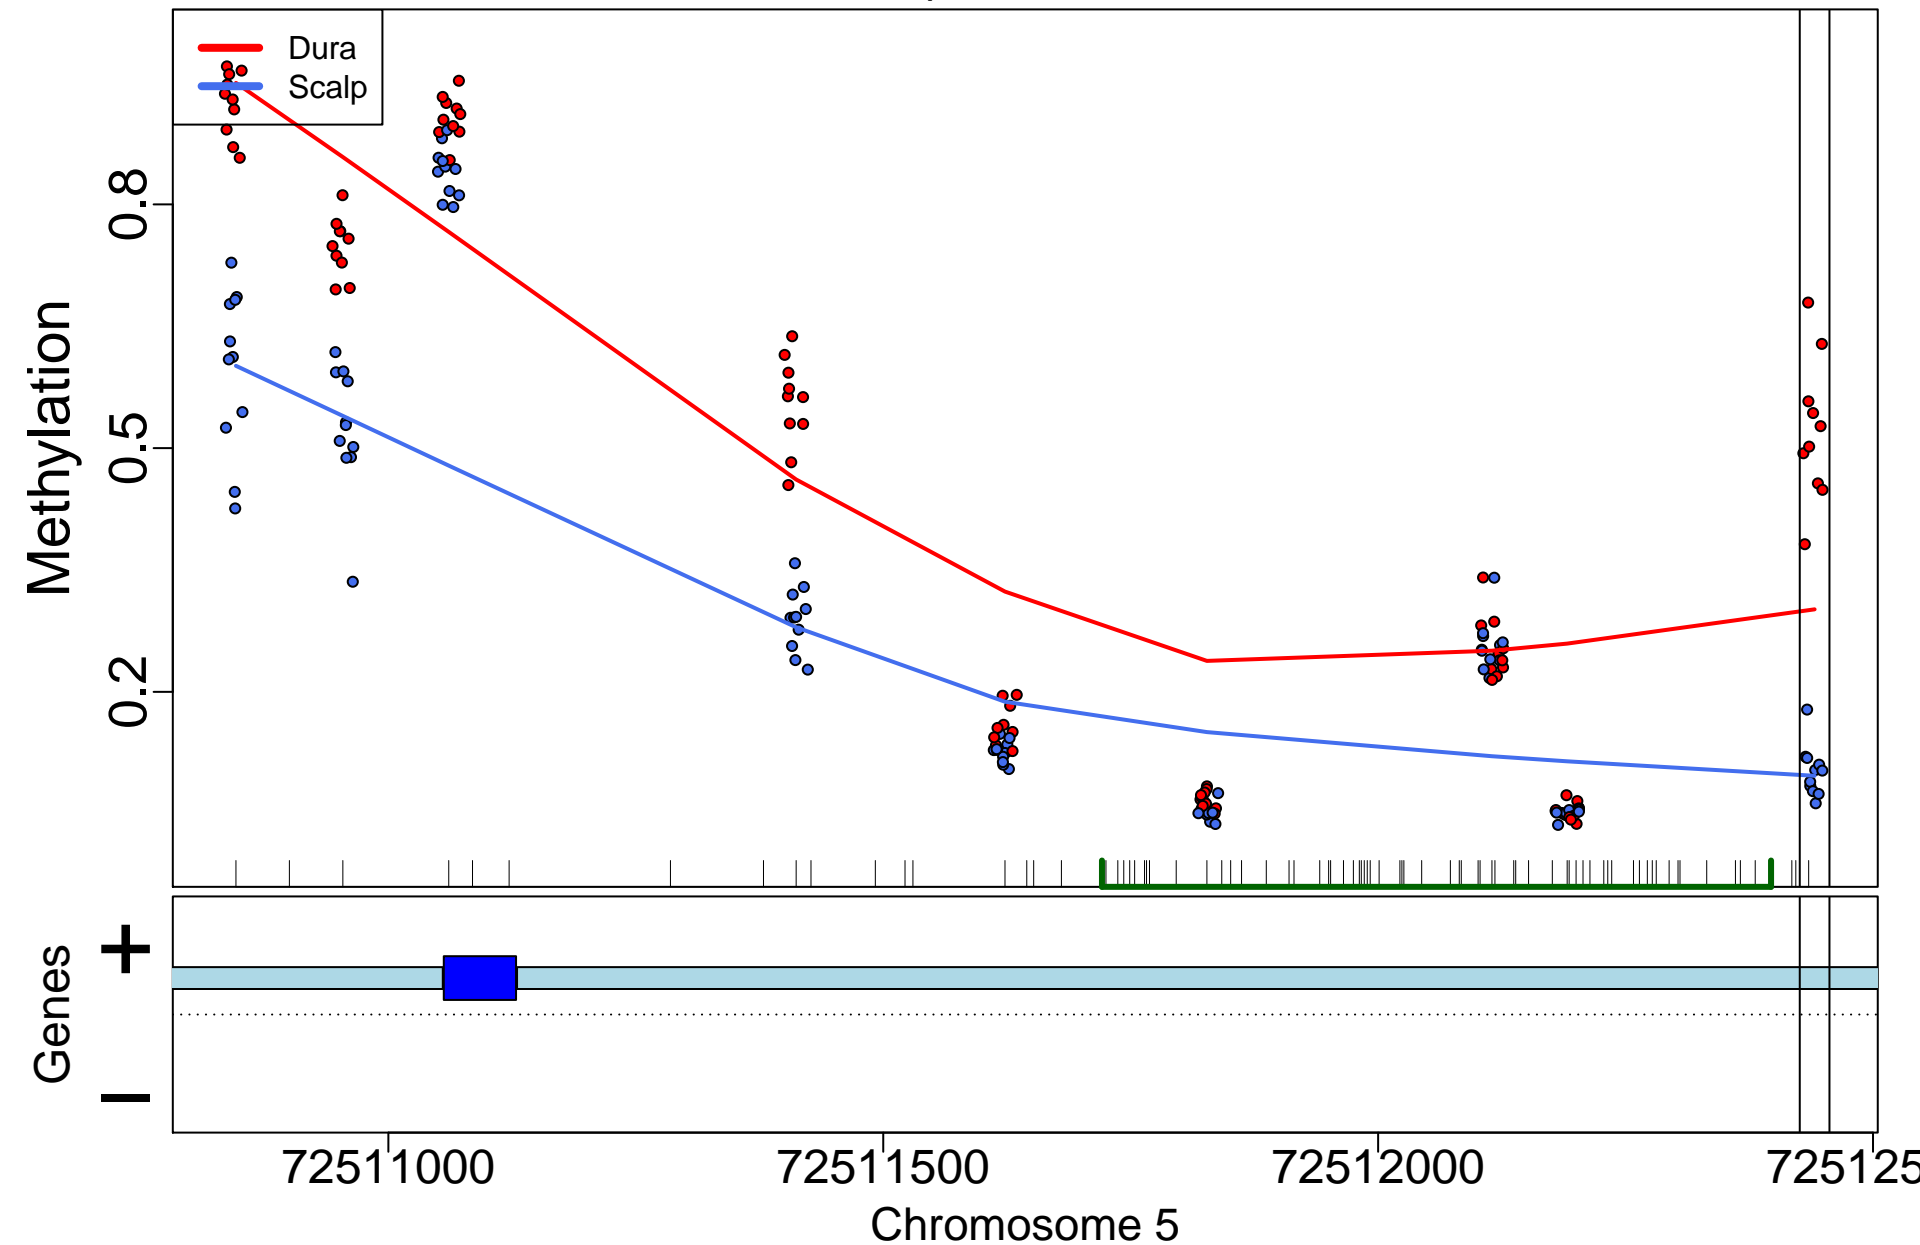

EVA1A; 10134bp from tss:inside intron

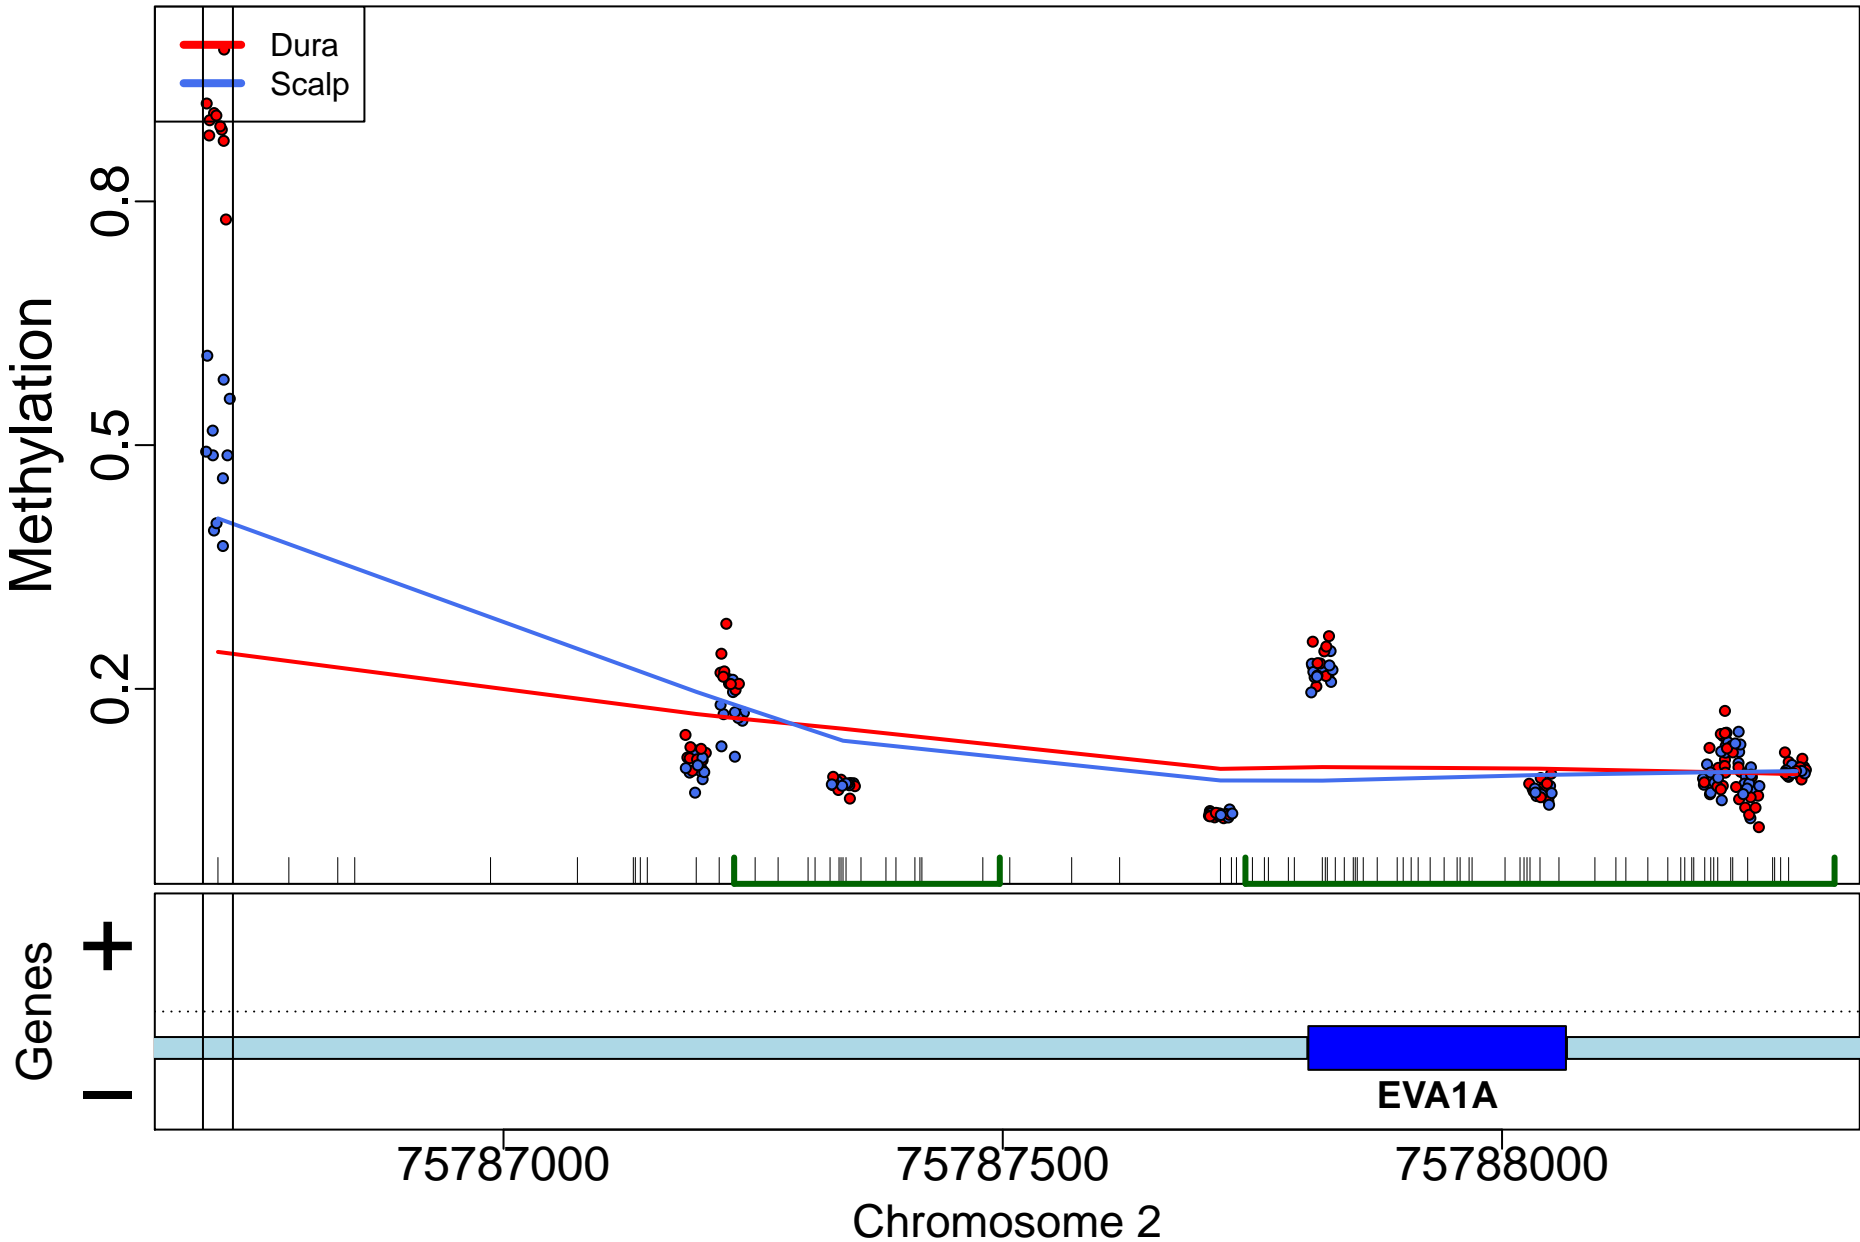



S100A13; 1201bp from tss:inside intron

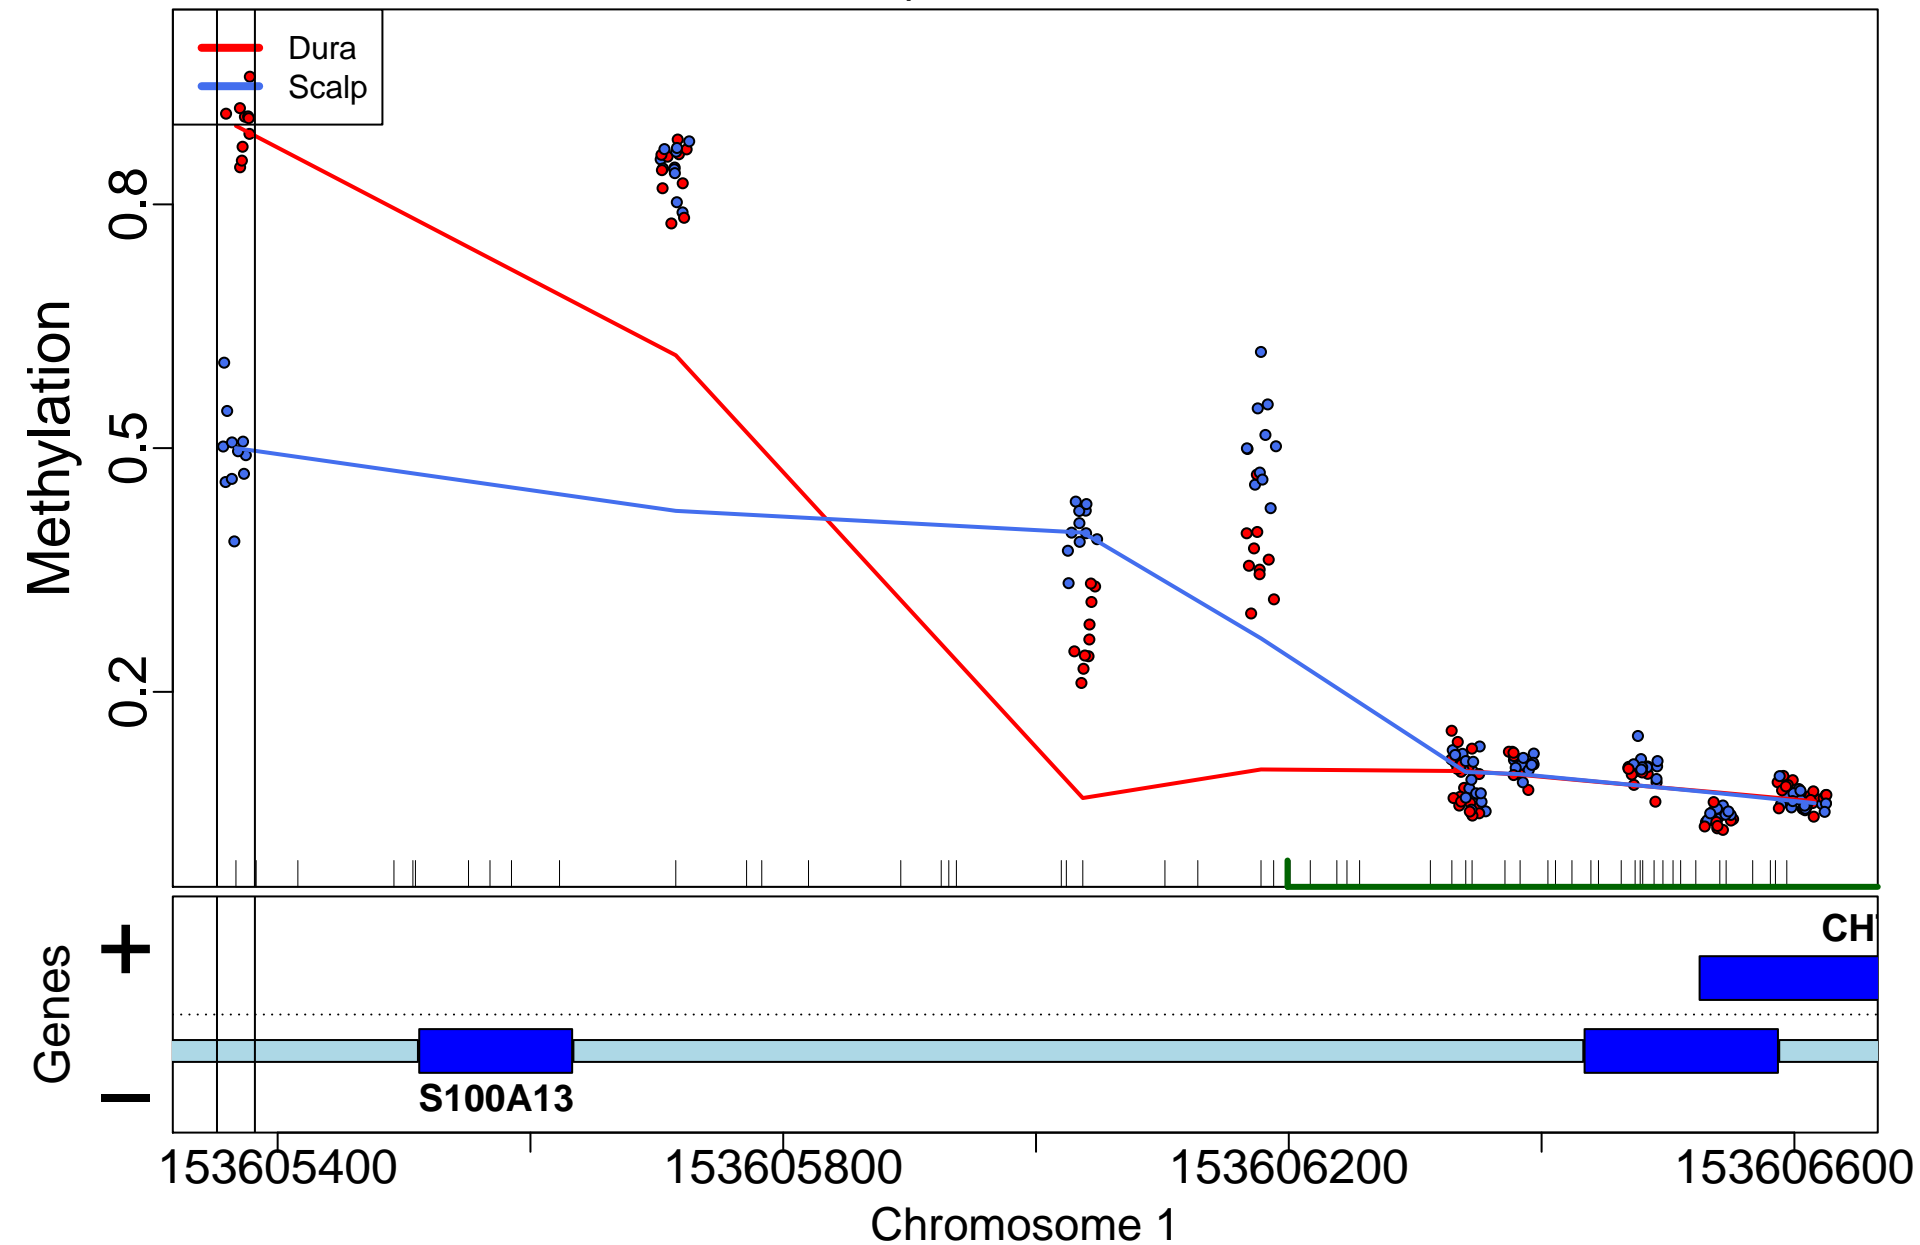

SIX6; 347bp from tss:inside exon

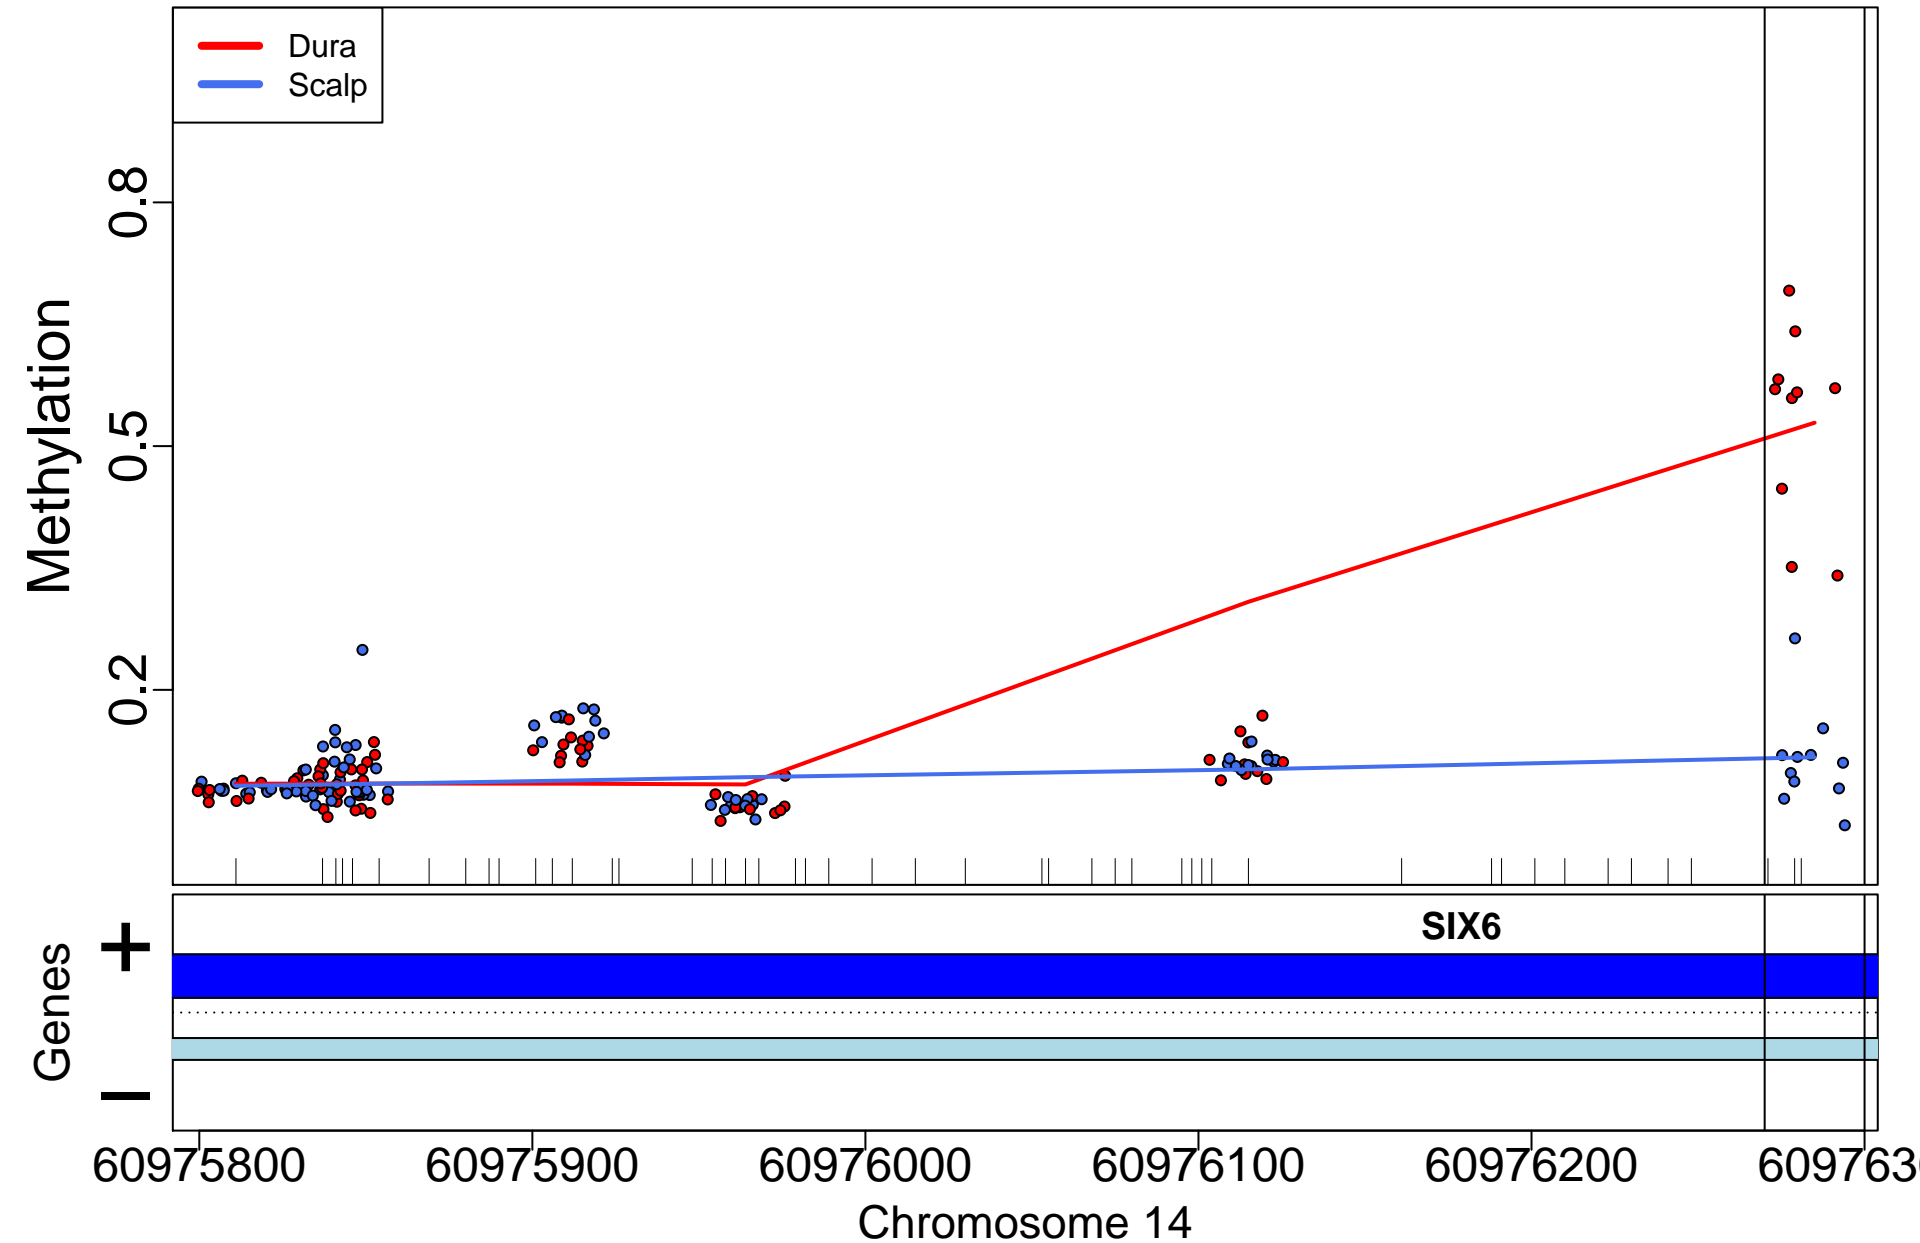

LOC100506746; 0bp from tss:NA

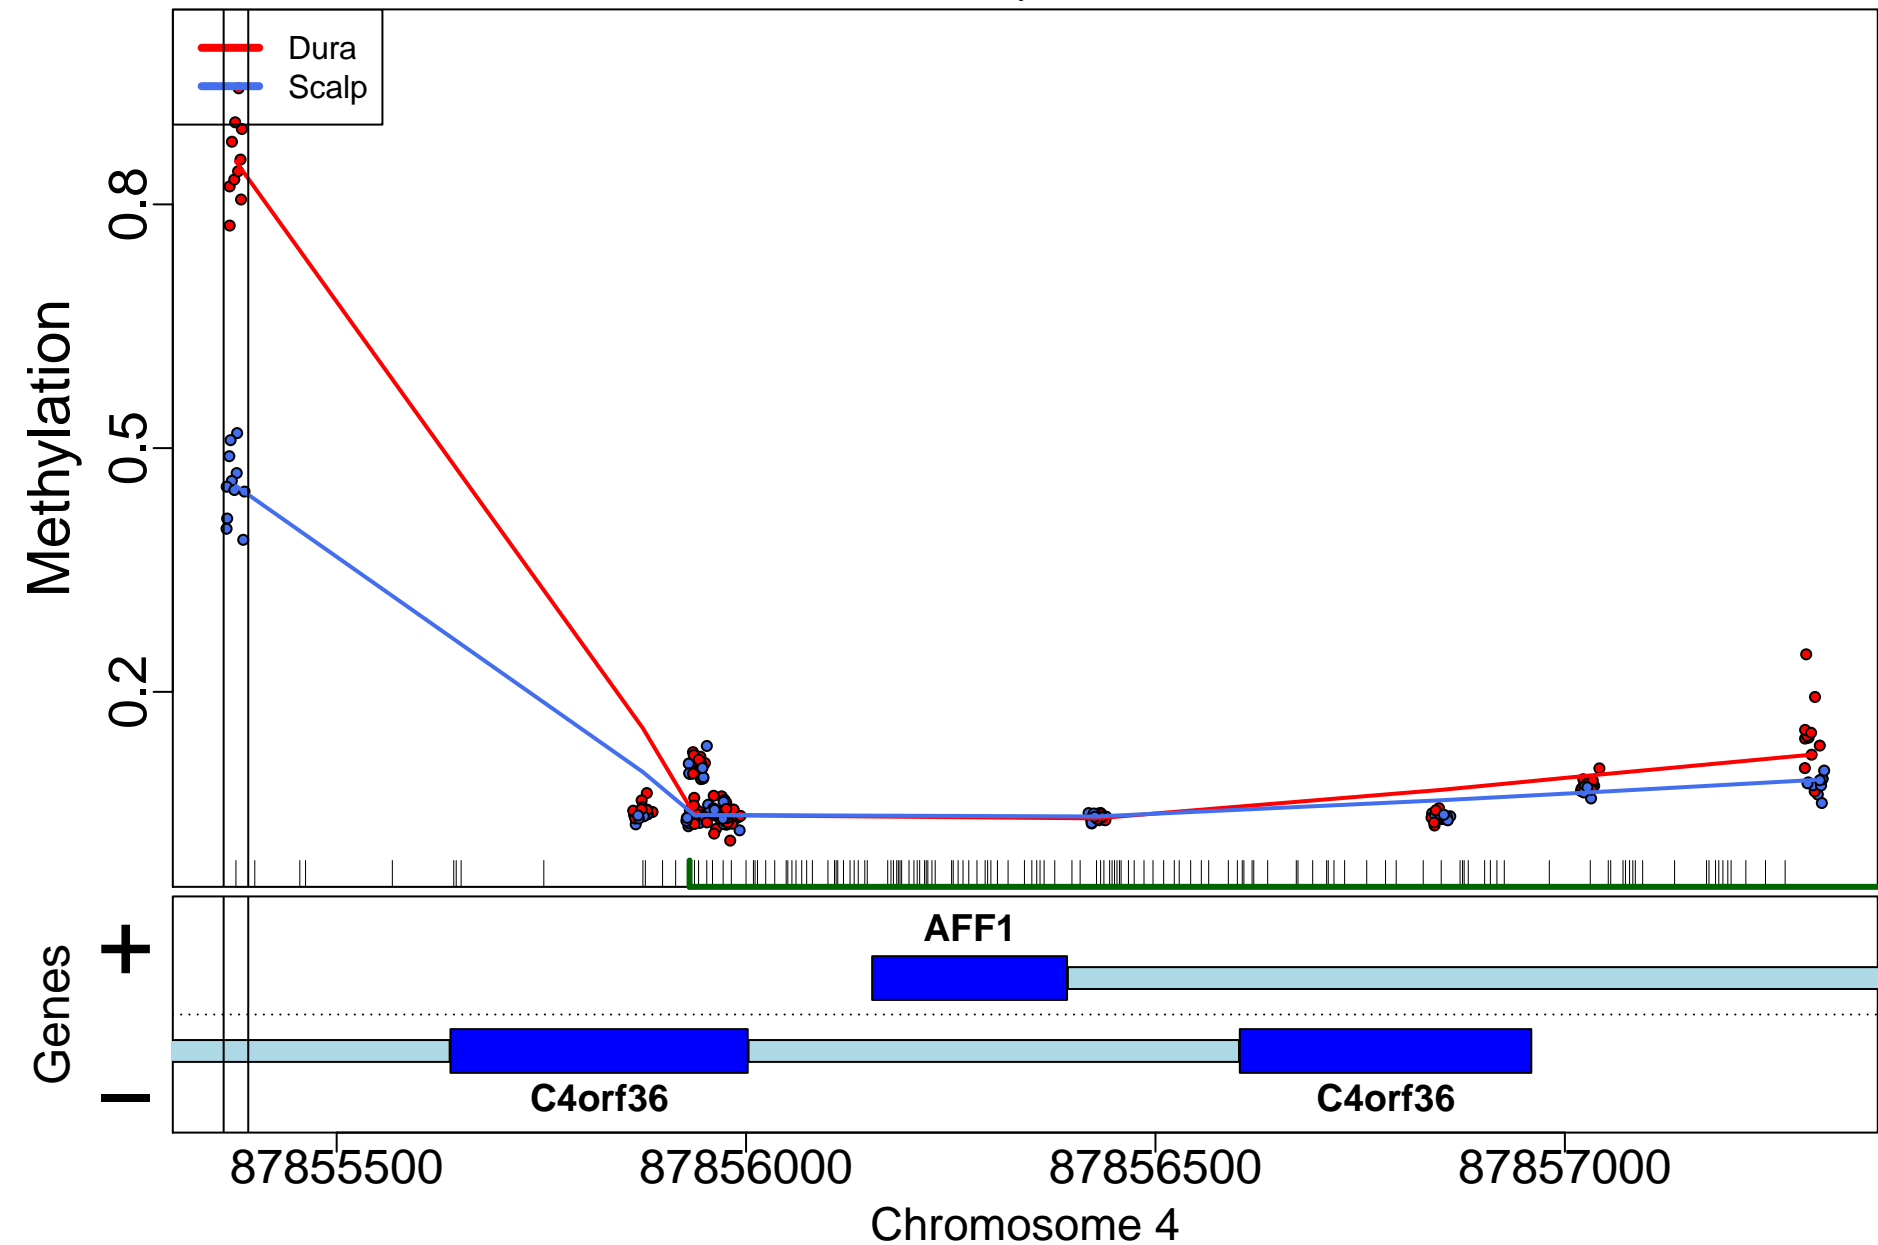

# HOXD3; 2504bp from tss:upstream

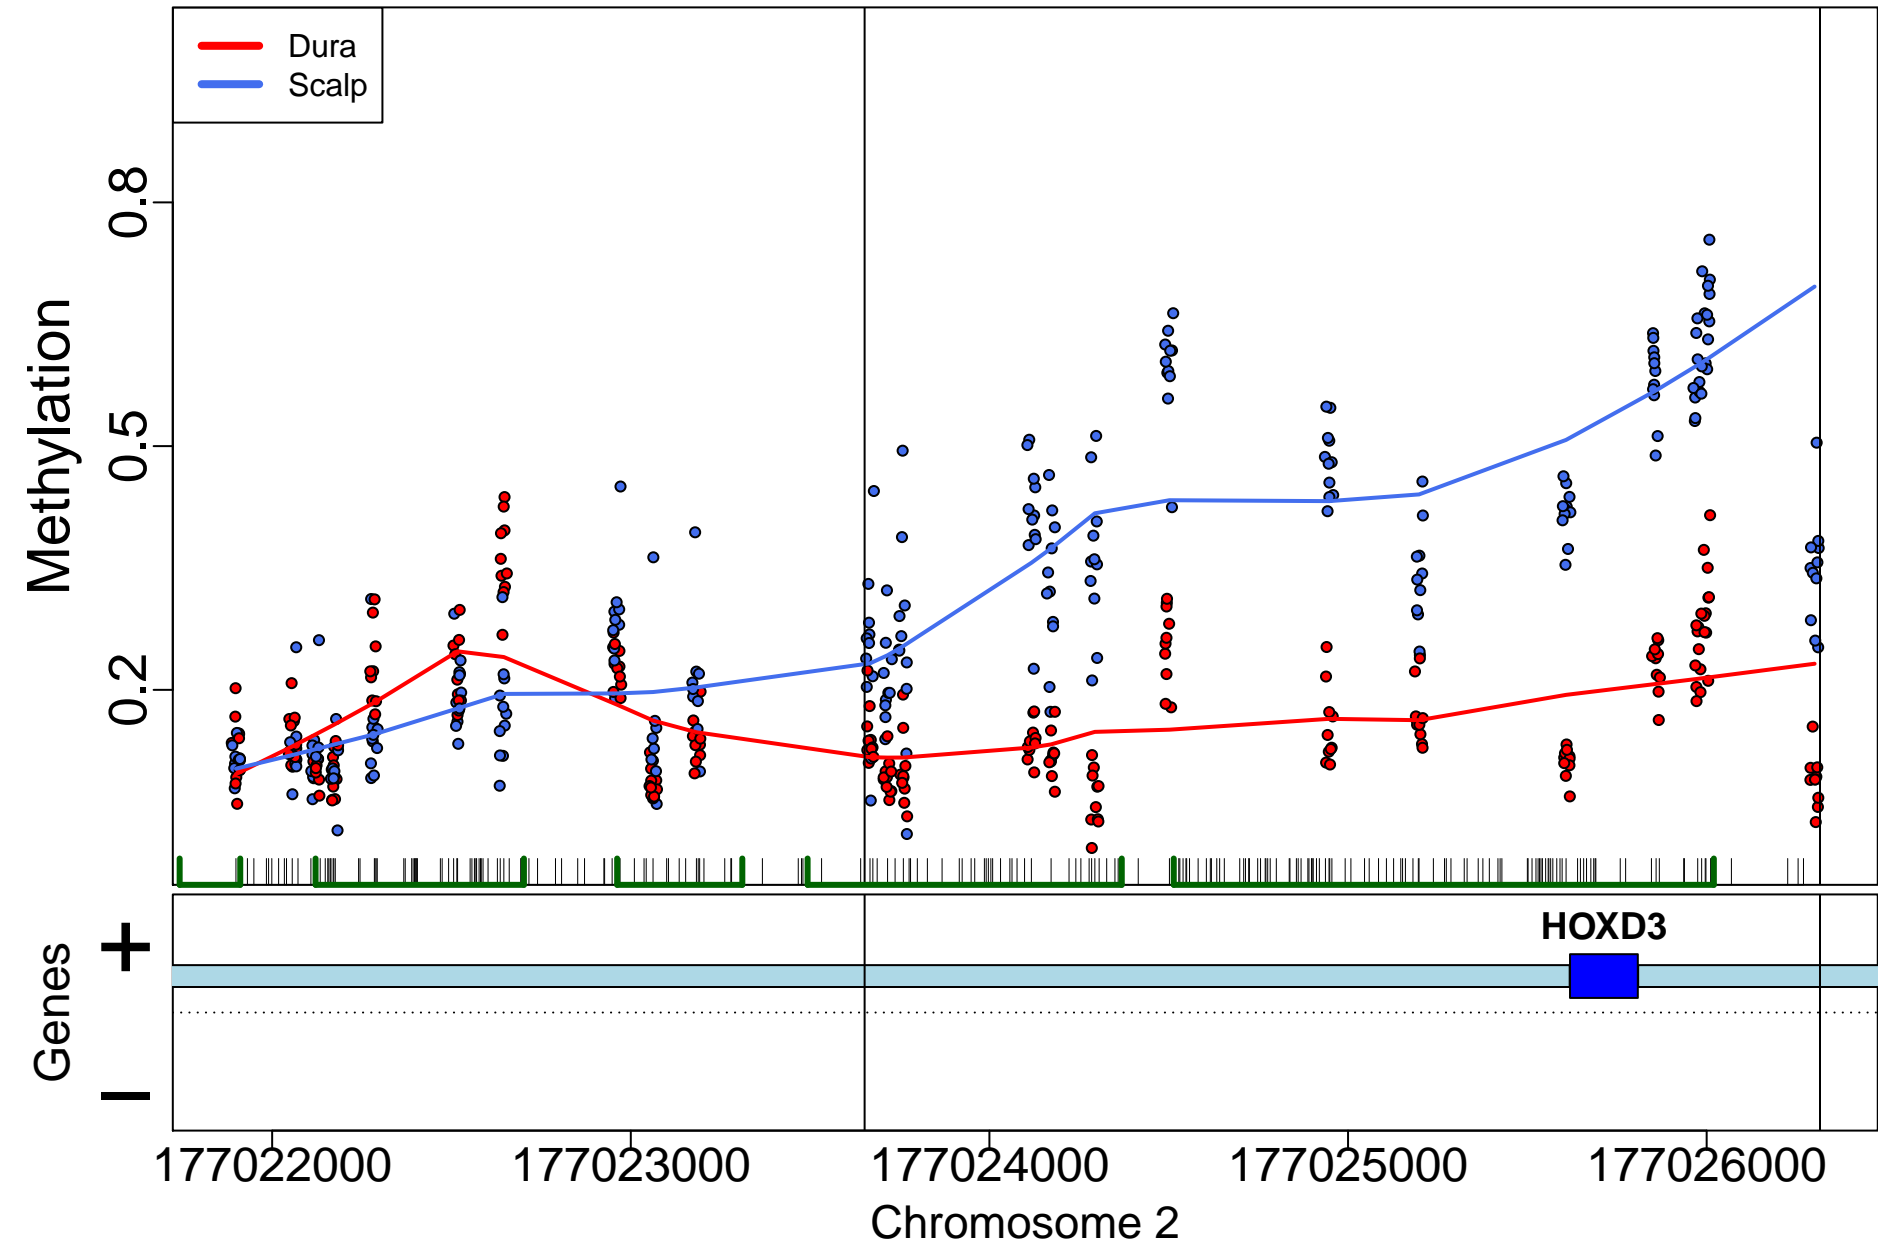

CLEC14A; 0bp from tss:overlaps 5'

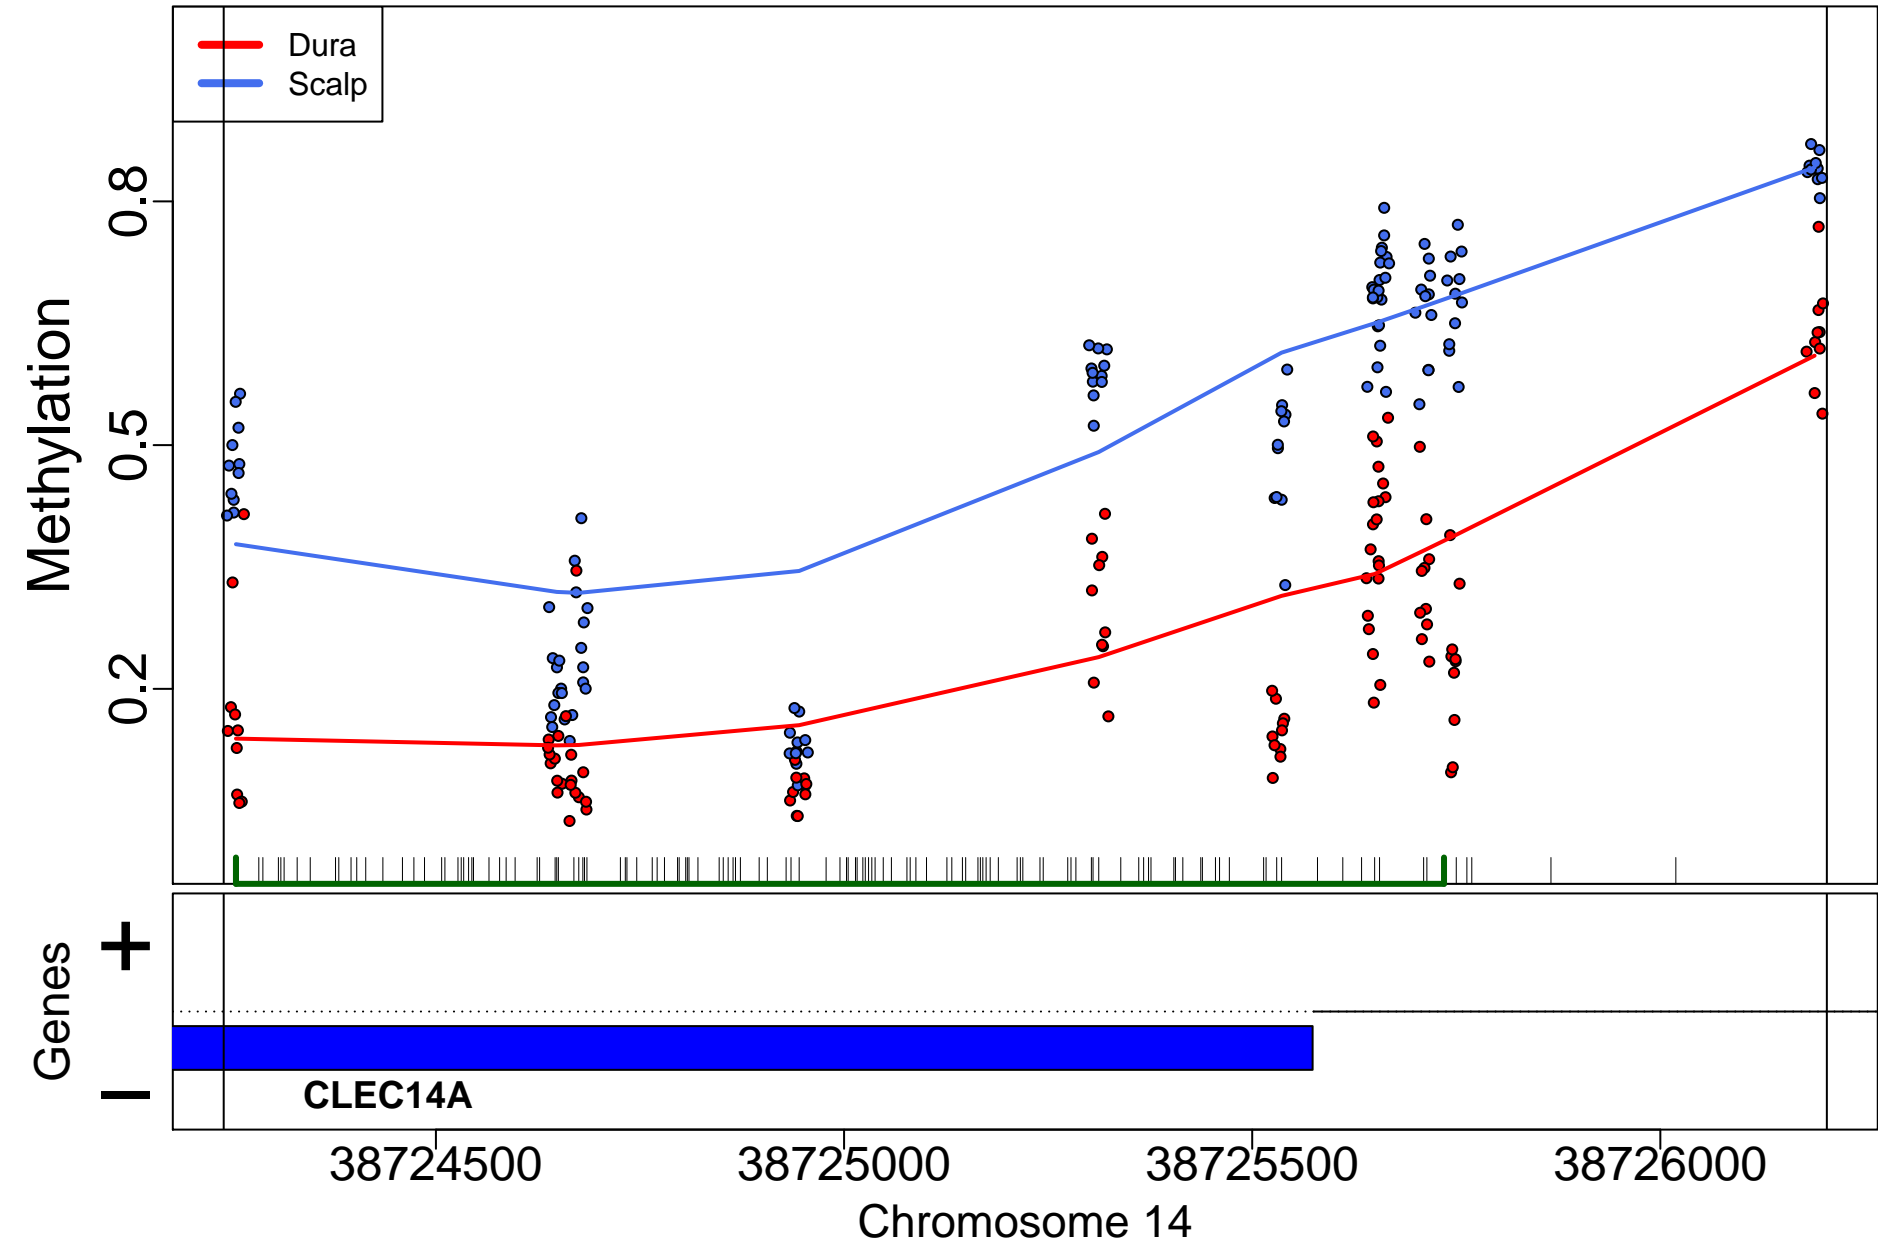

PRDM1; 104061bp from tss:upstream

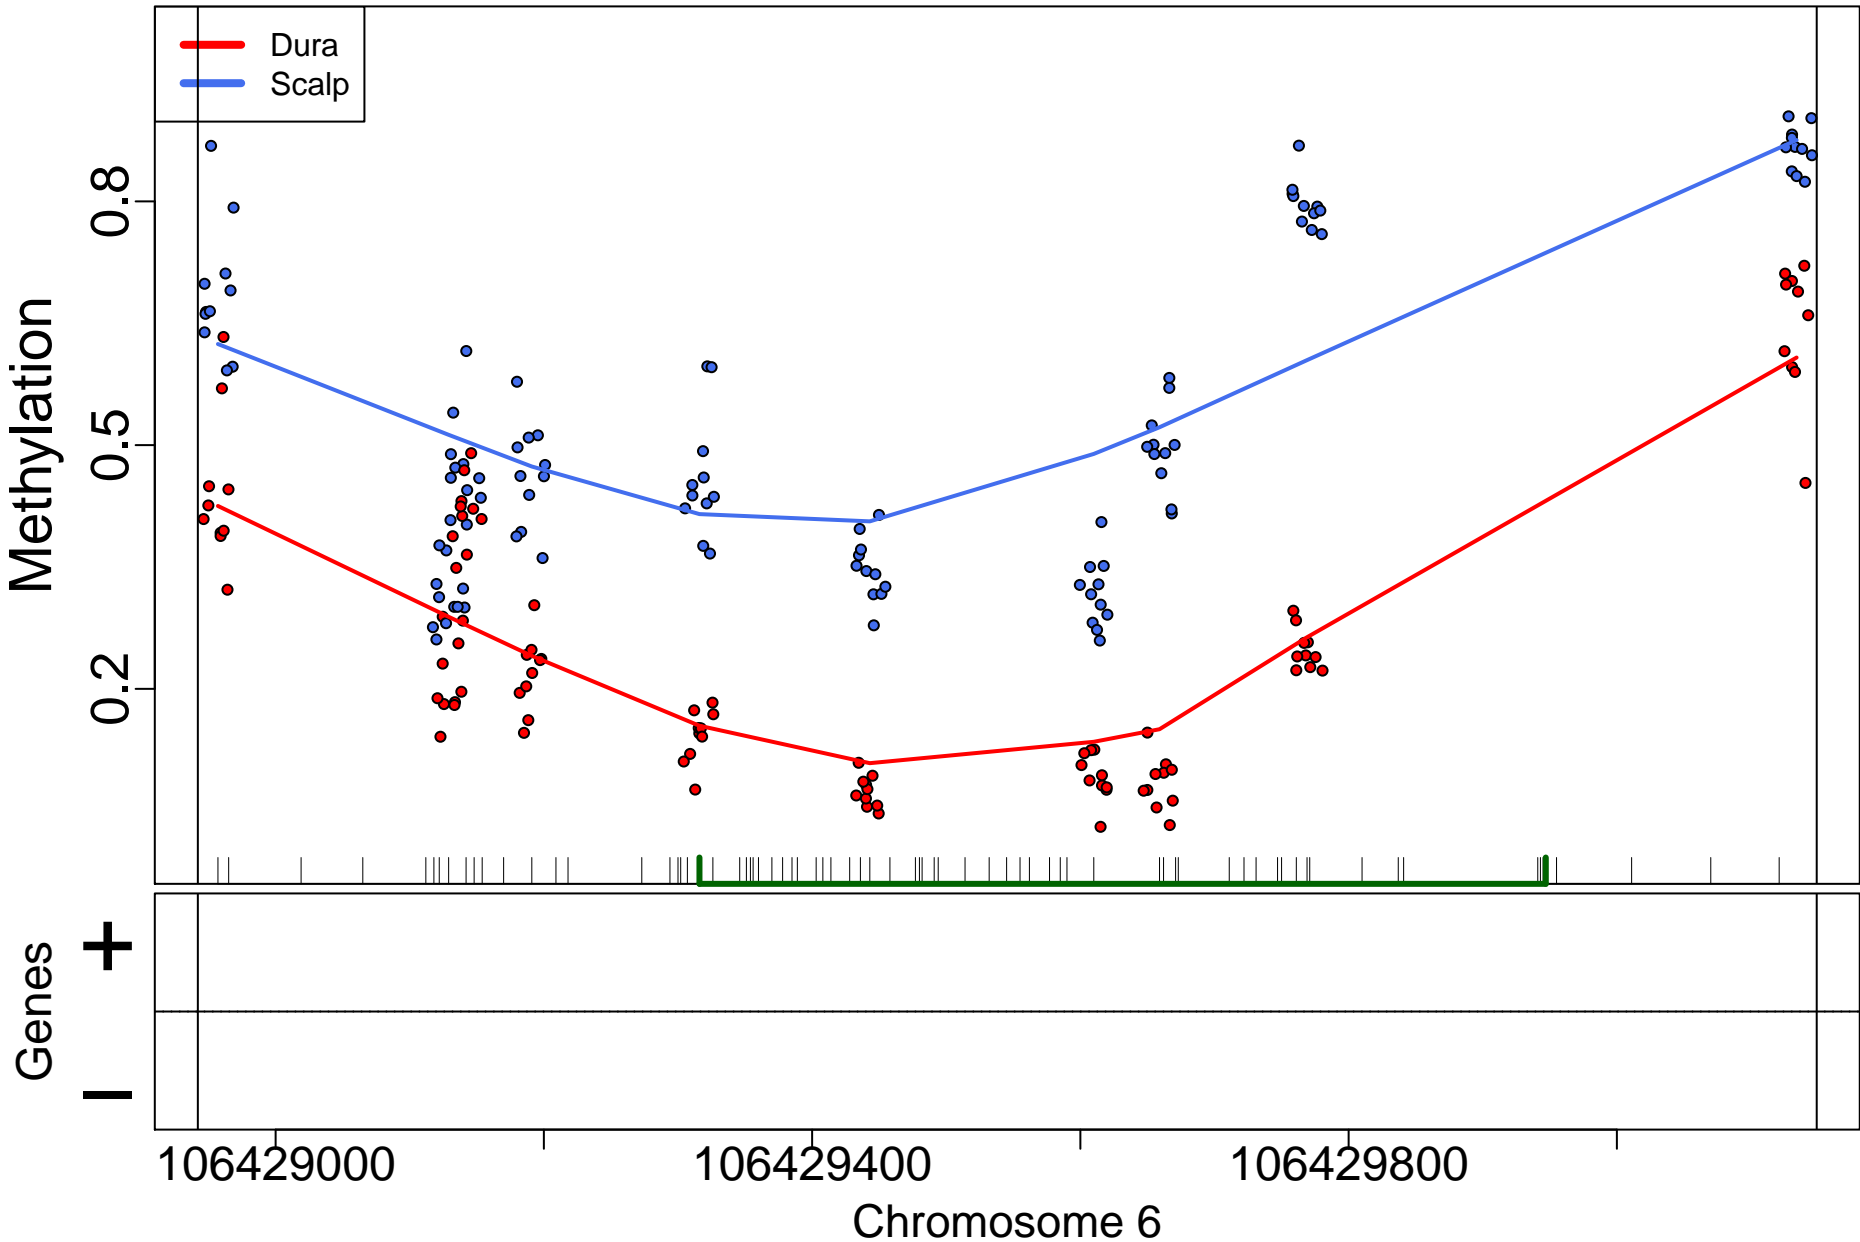

NKX2-5; 10369bp from tss:upstream

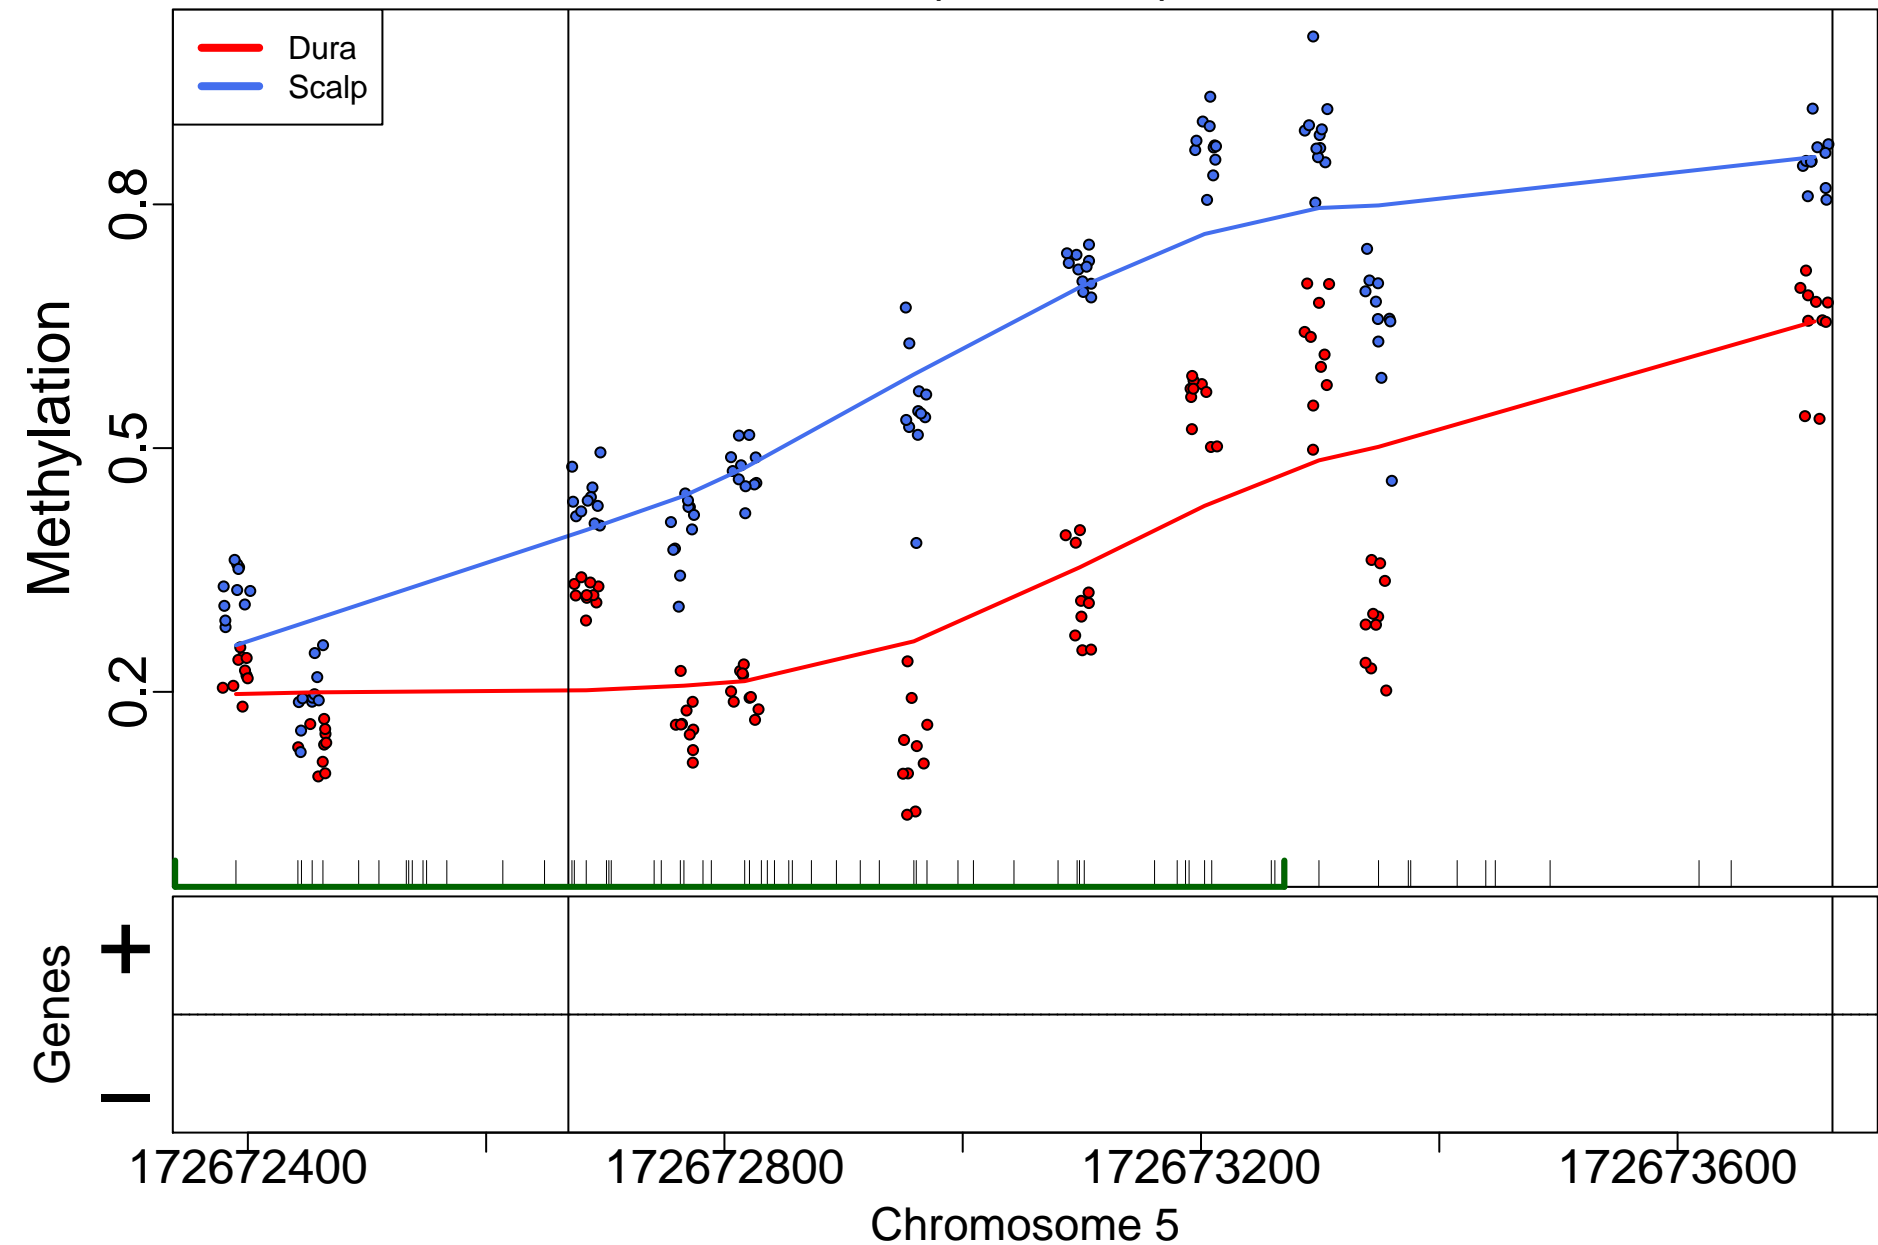

PCCA; 432348bp from tss:inside intron

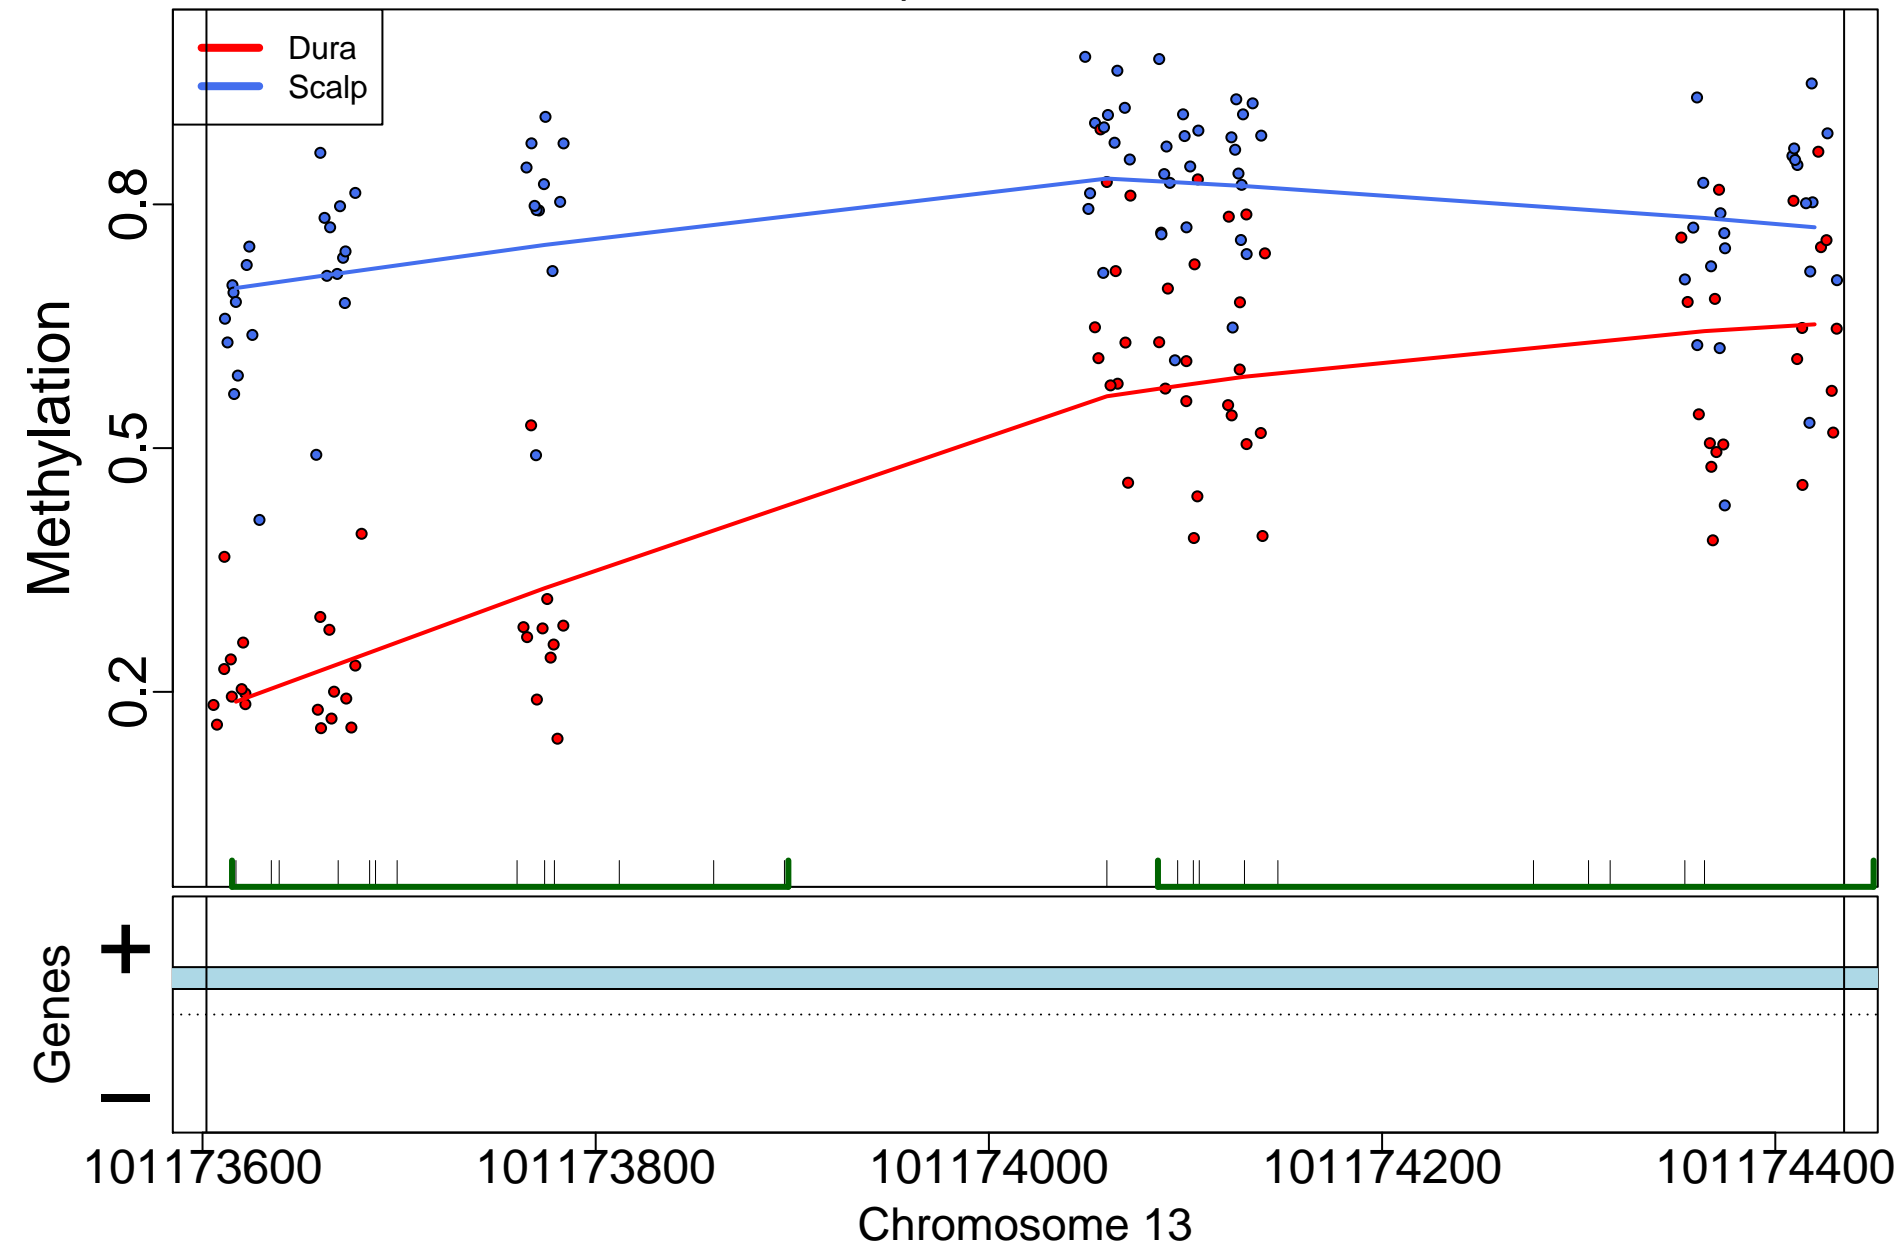



PITX2; 853bp from tss:overlaps exon upstream

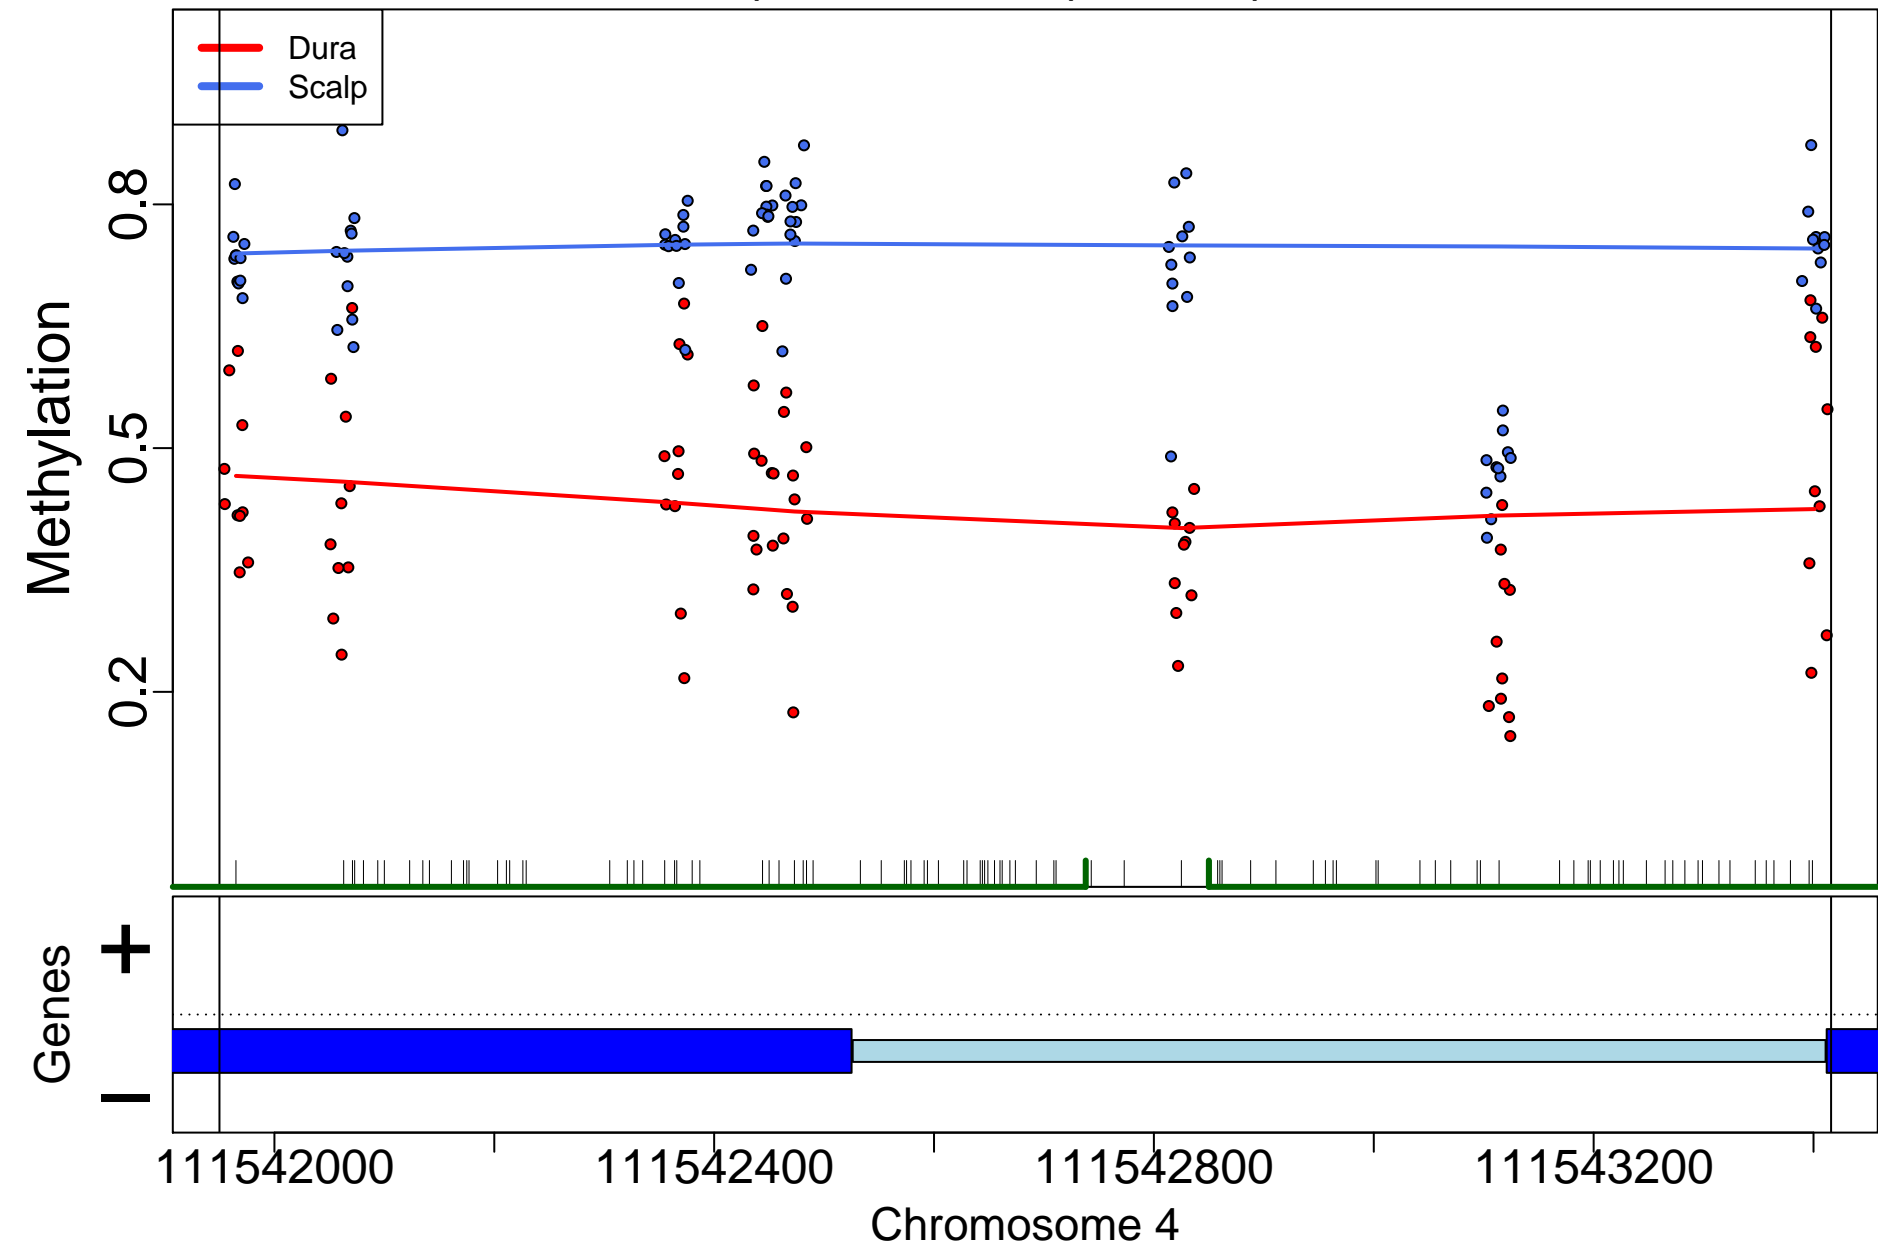

# SENP7; 1082bp from tss:inside intron

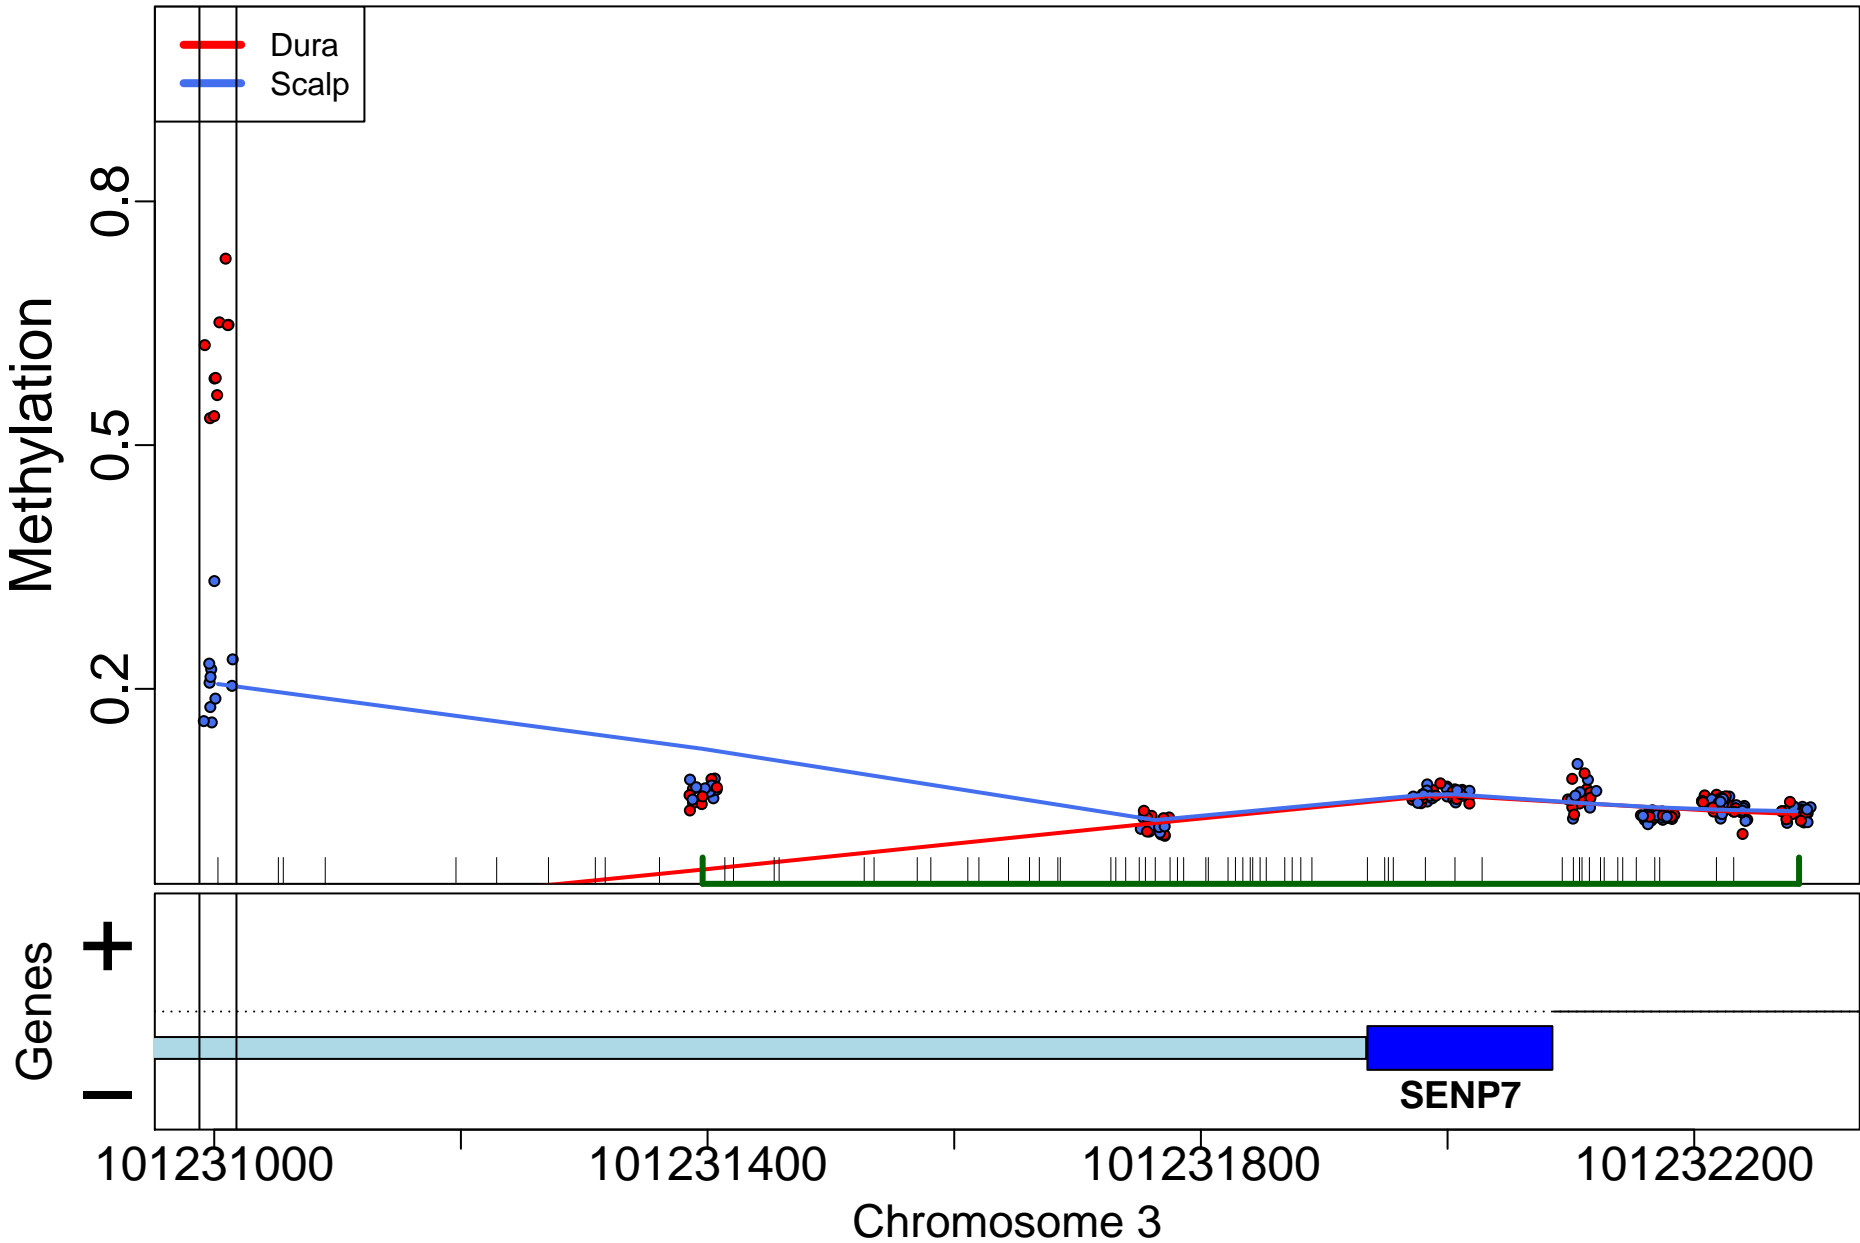

ALX4; 3293bp from tss:inside intron

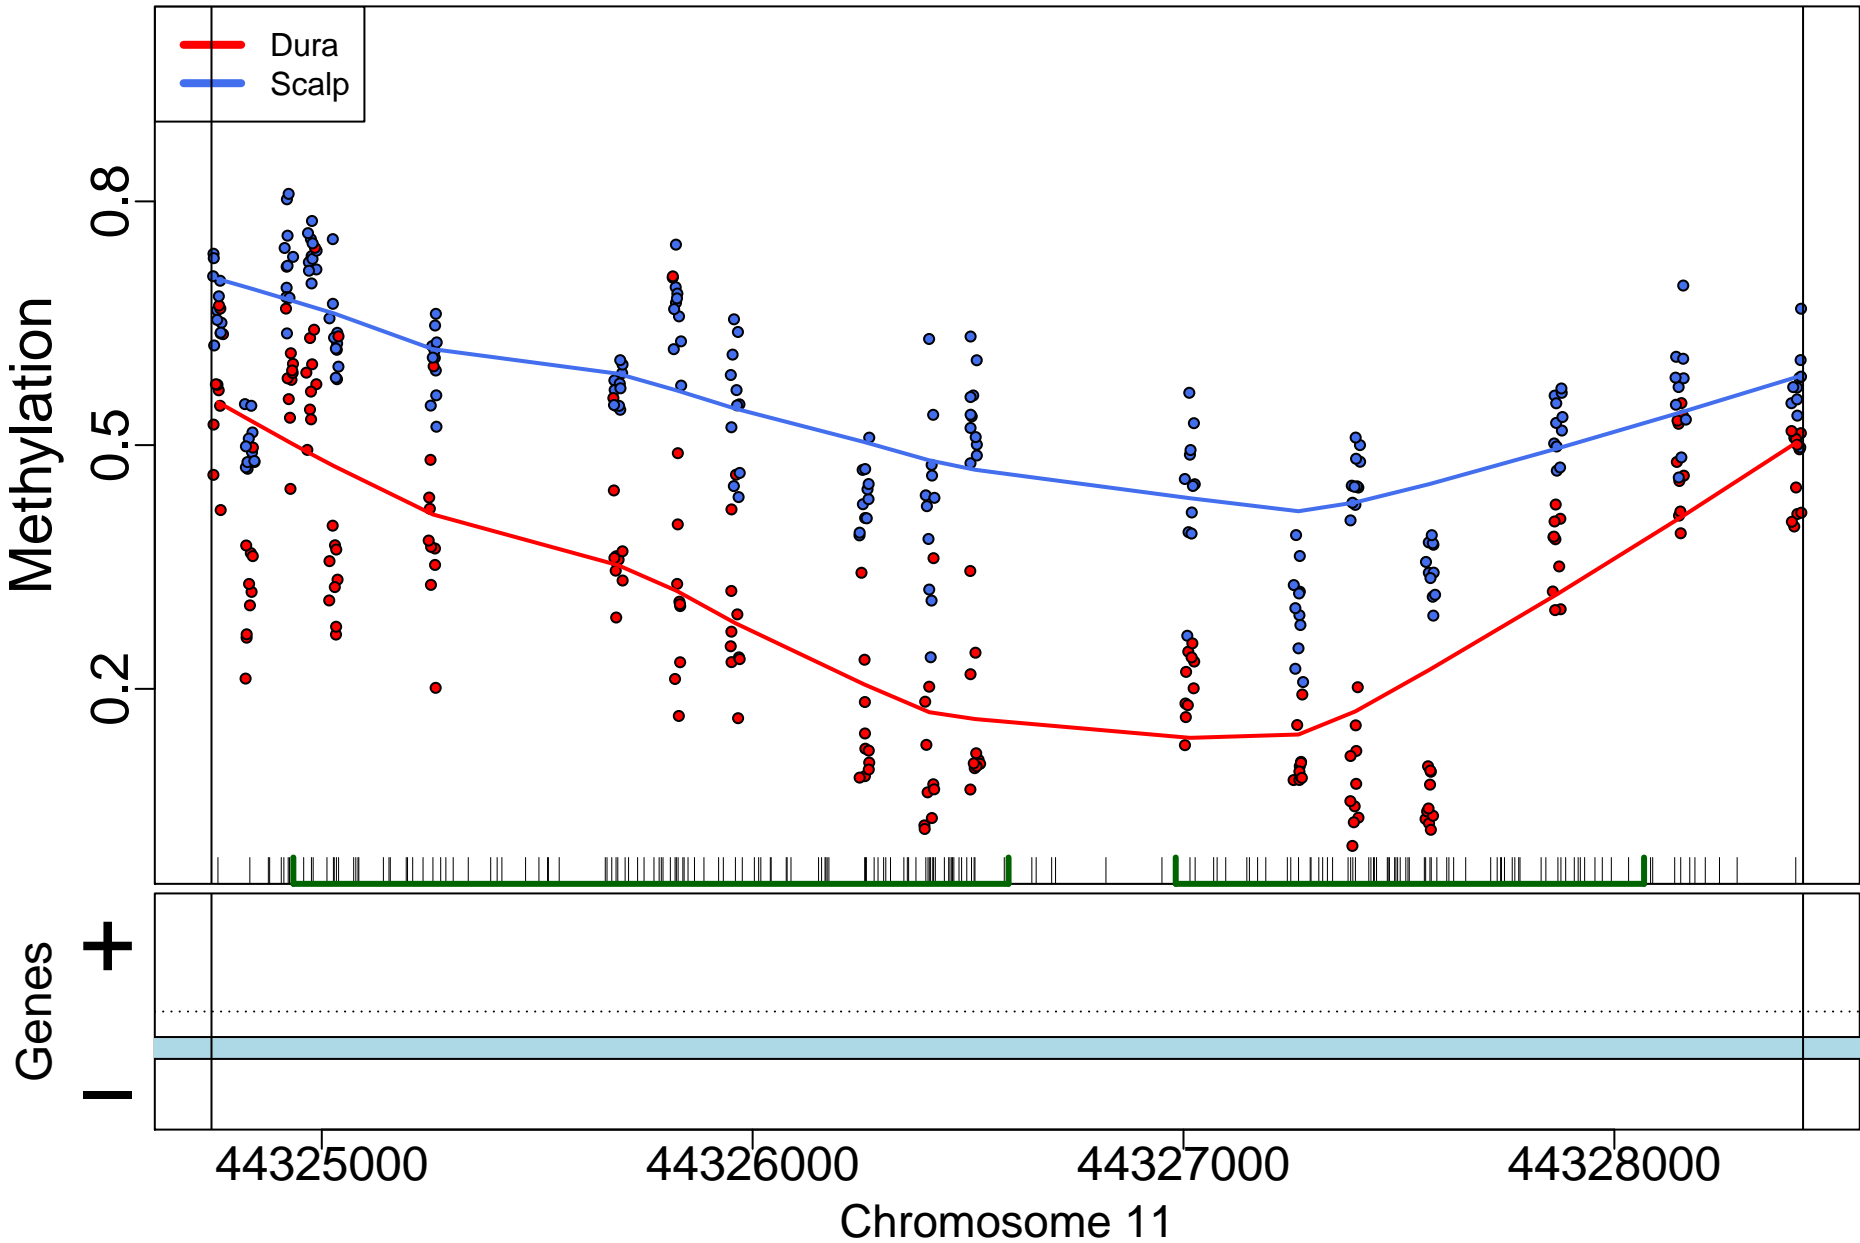

NKX2-5; 0bp from tss:overlaps 5'

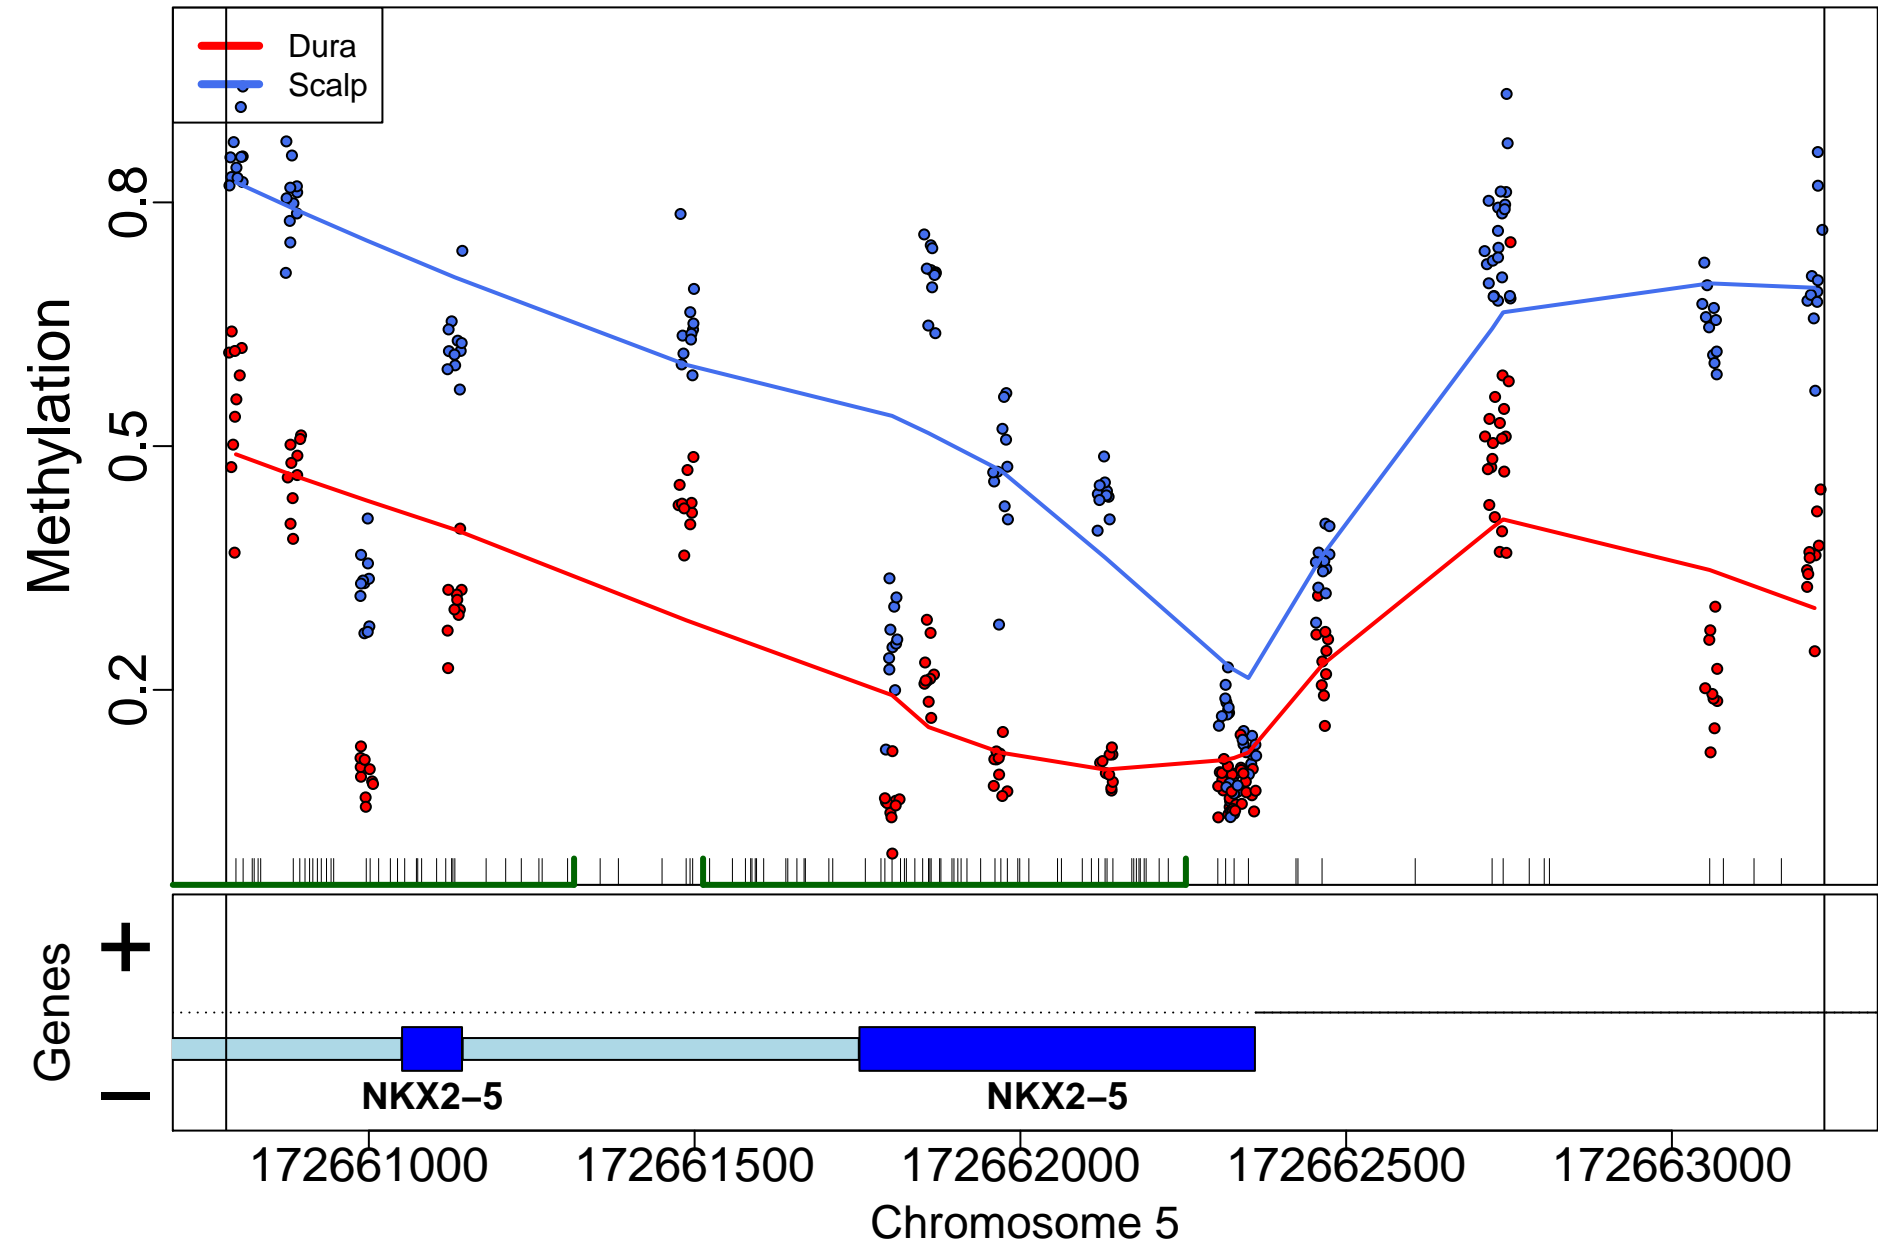

PRDM16; 176362bp from tss:inside intron

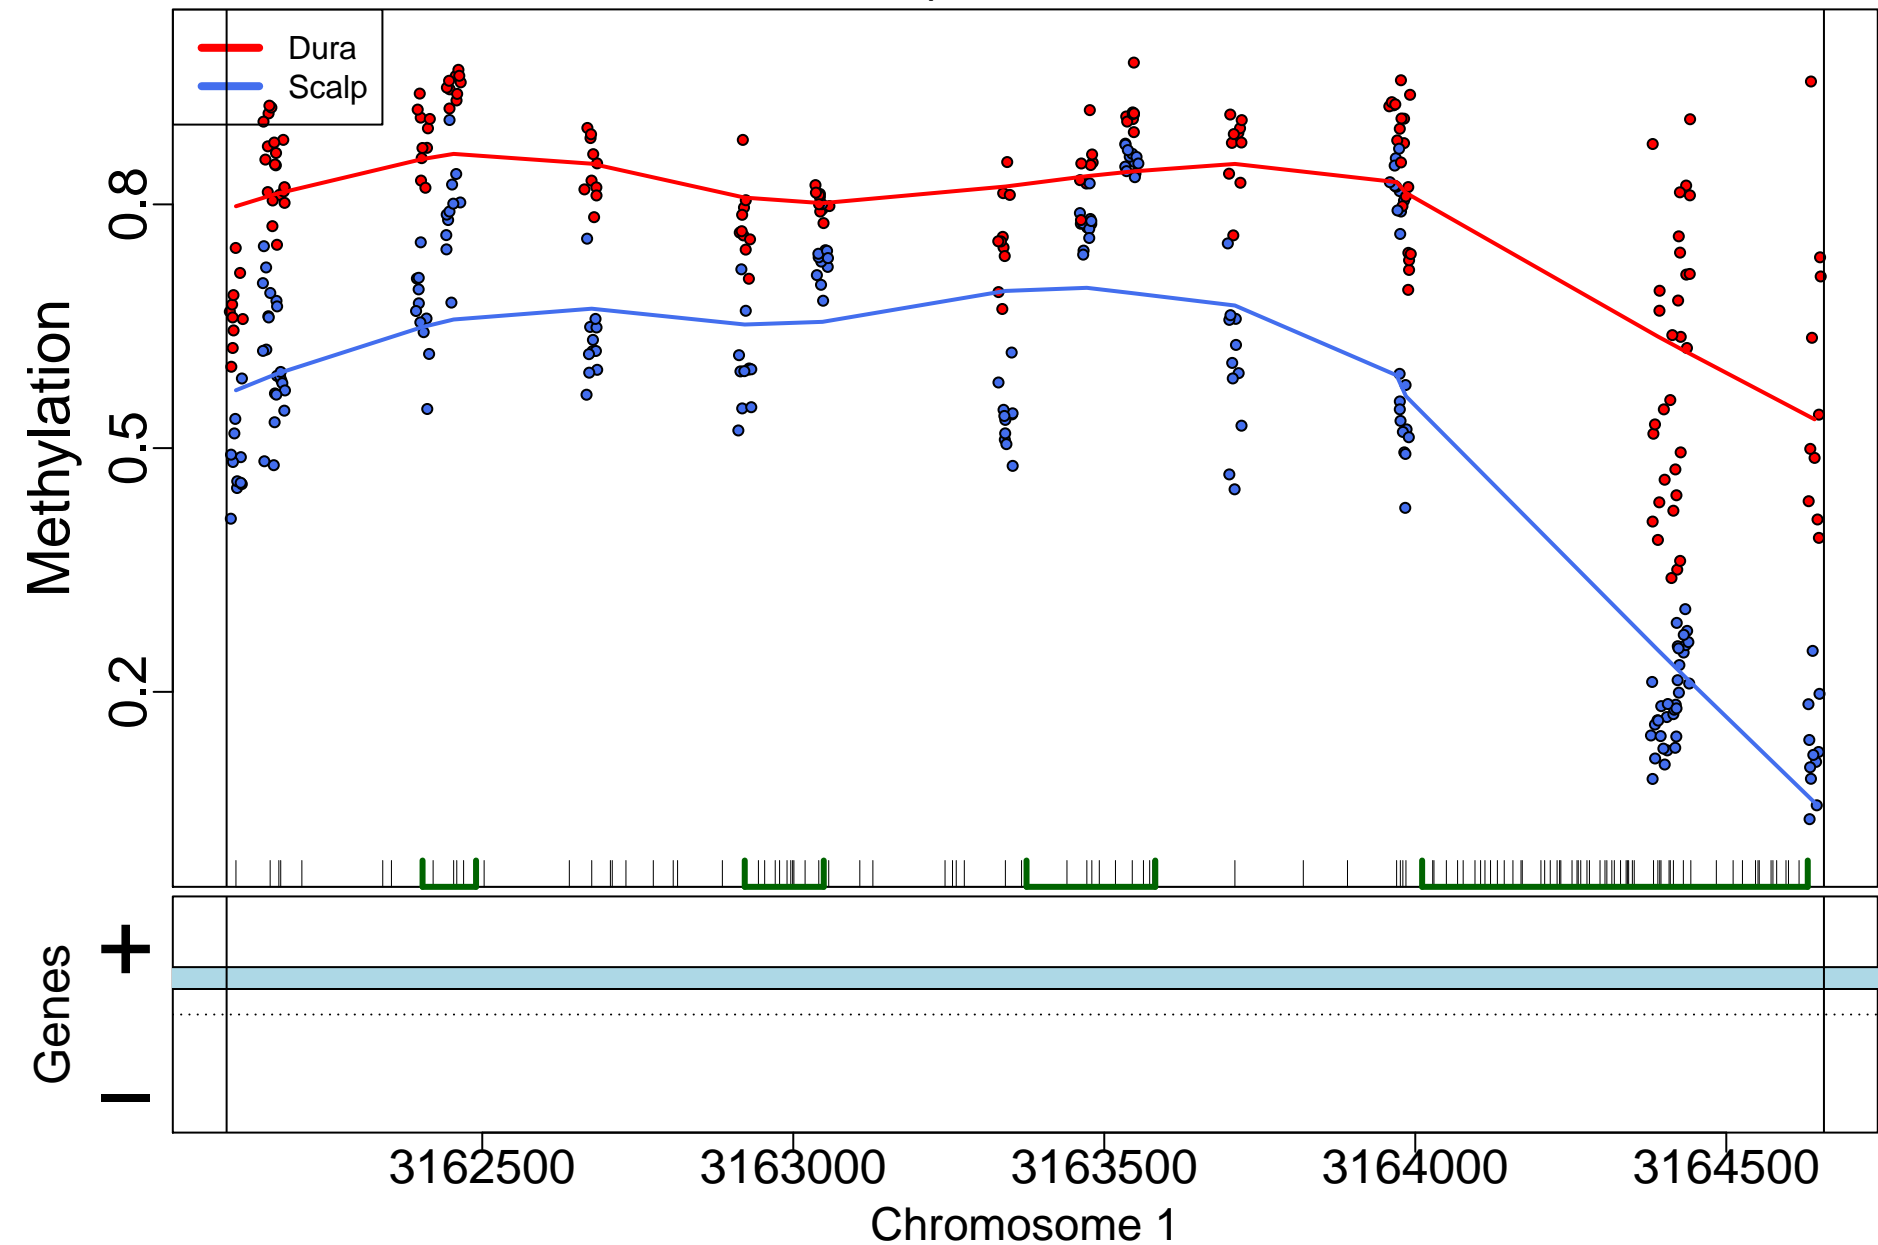

SLC22A8; 0bp from tss:overlaps 5'

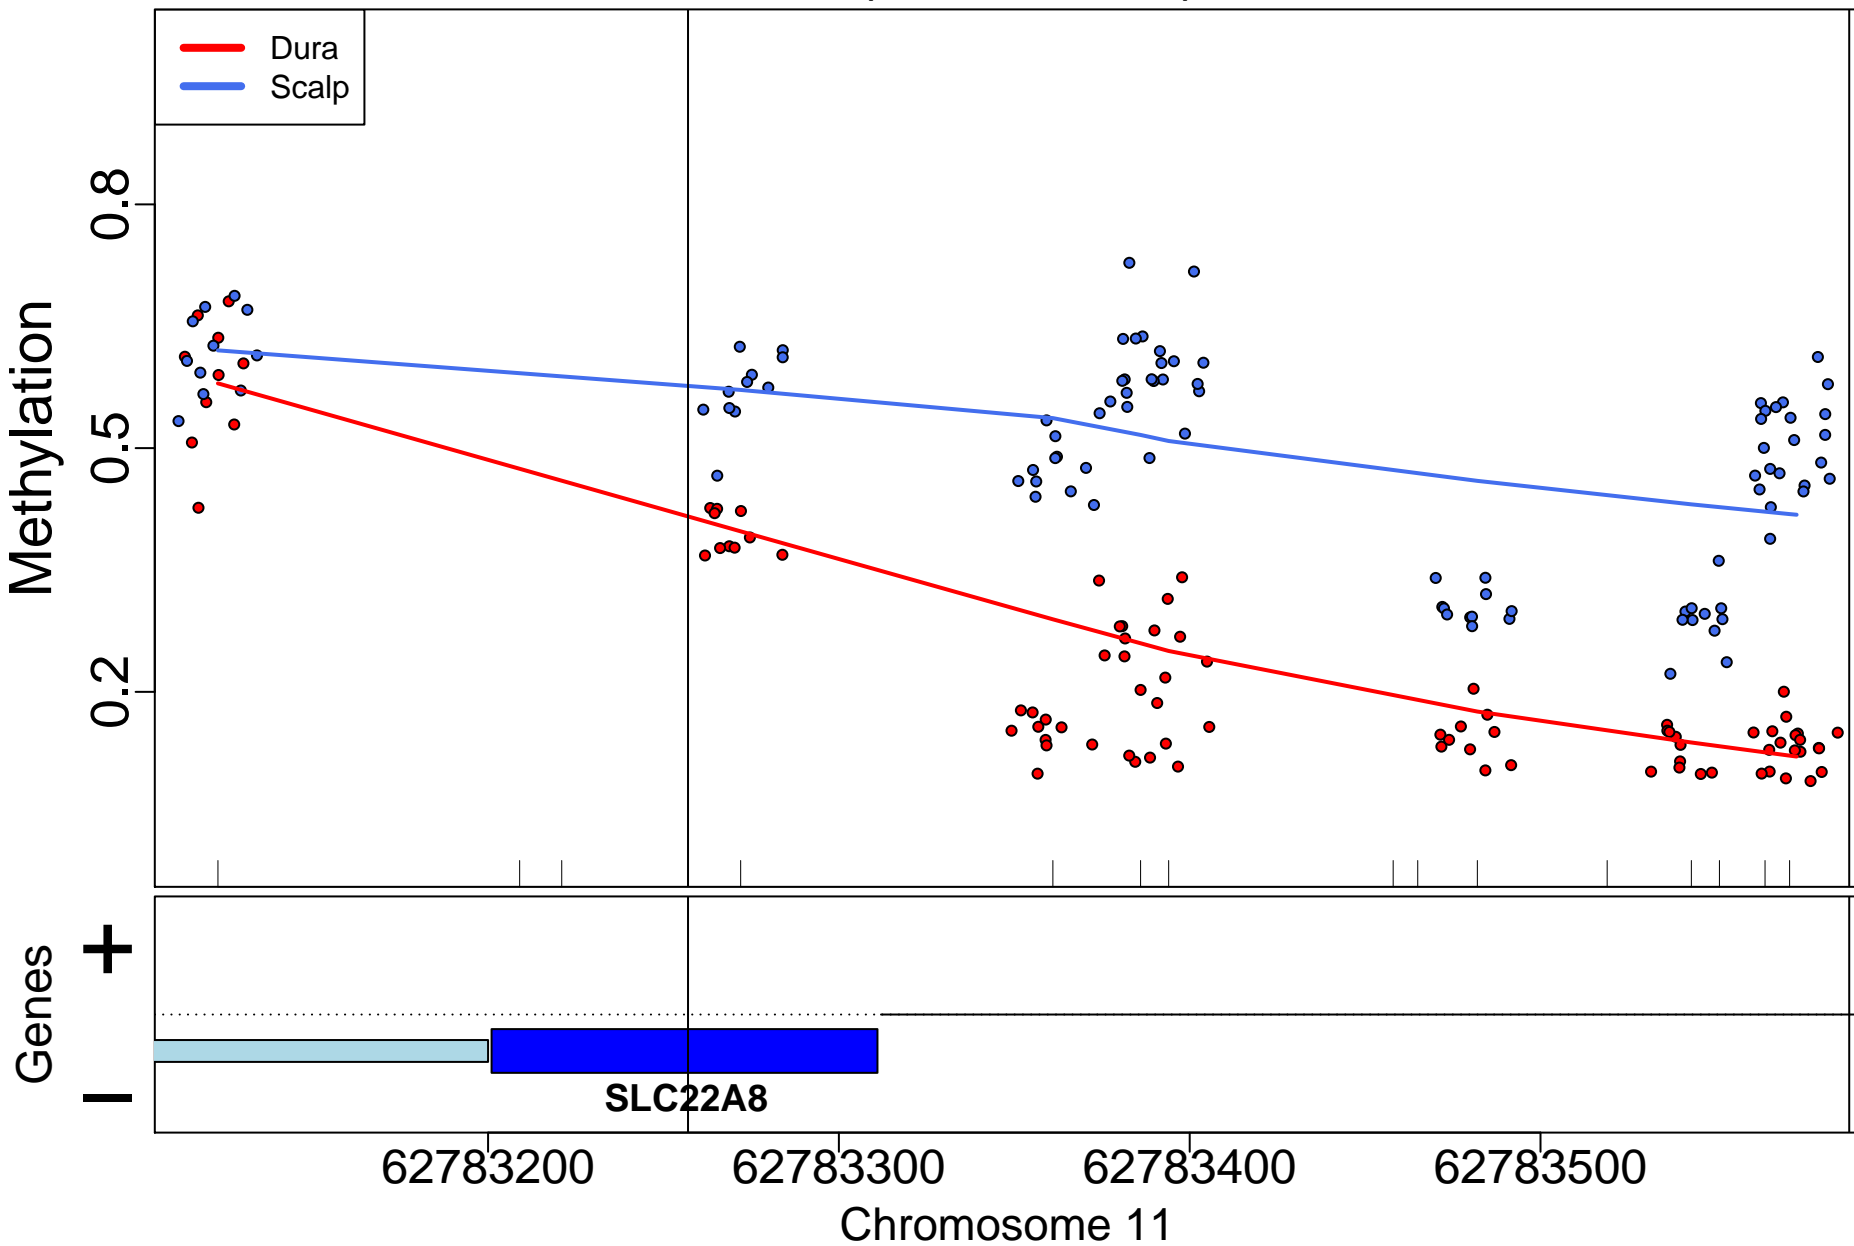

PITX2; 12140bp from tss:inside intron

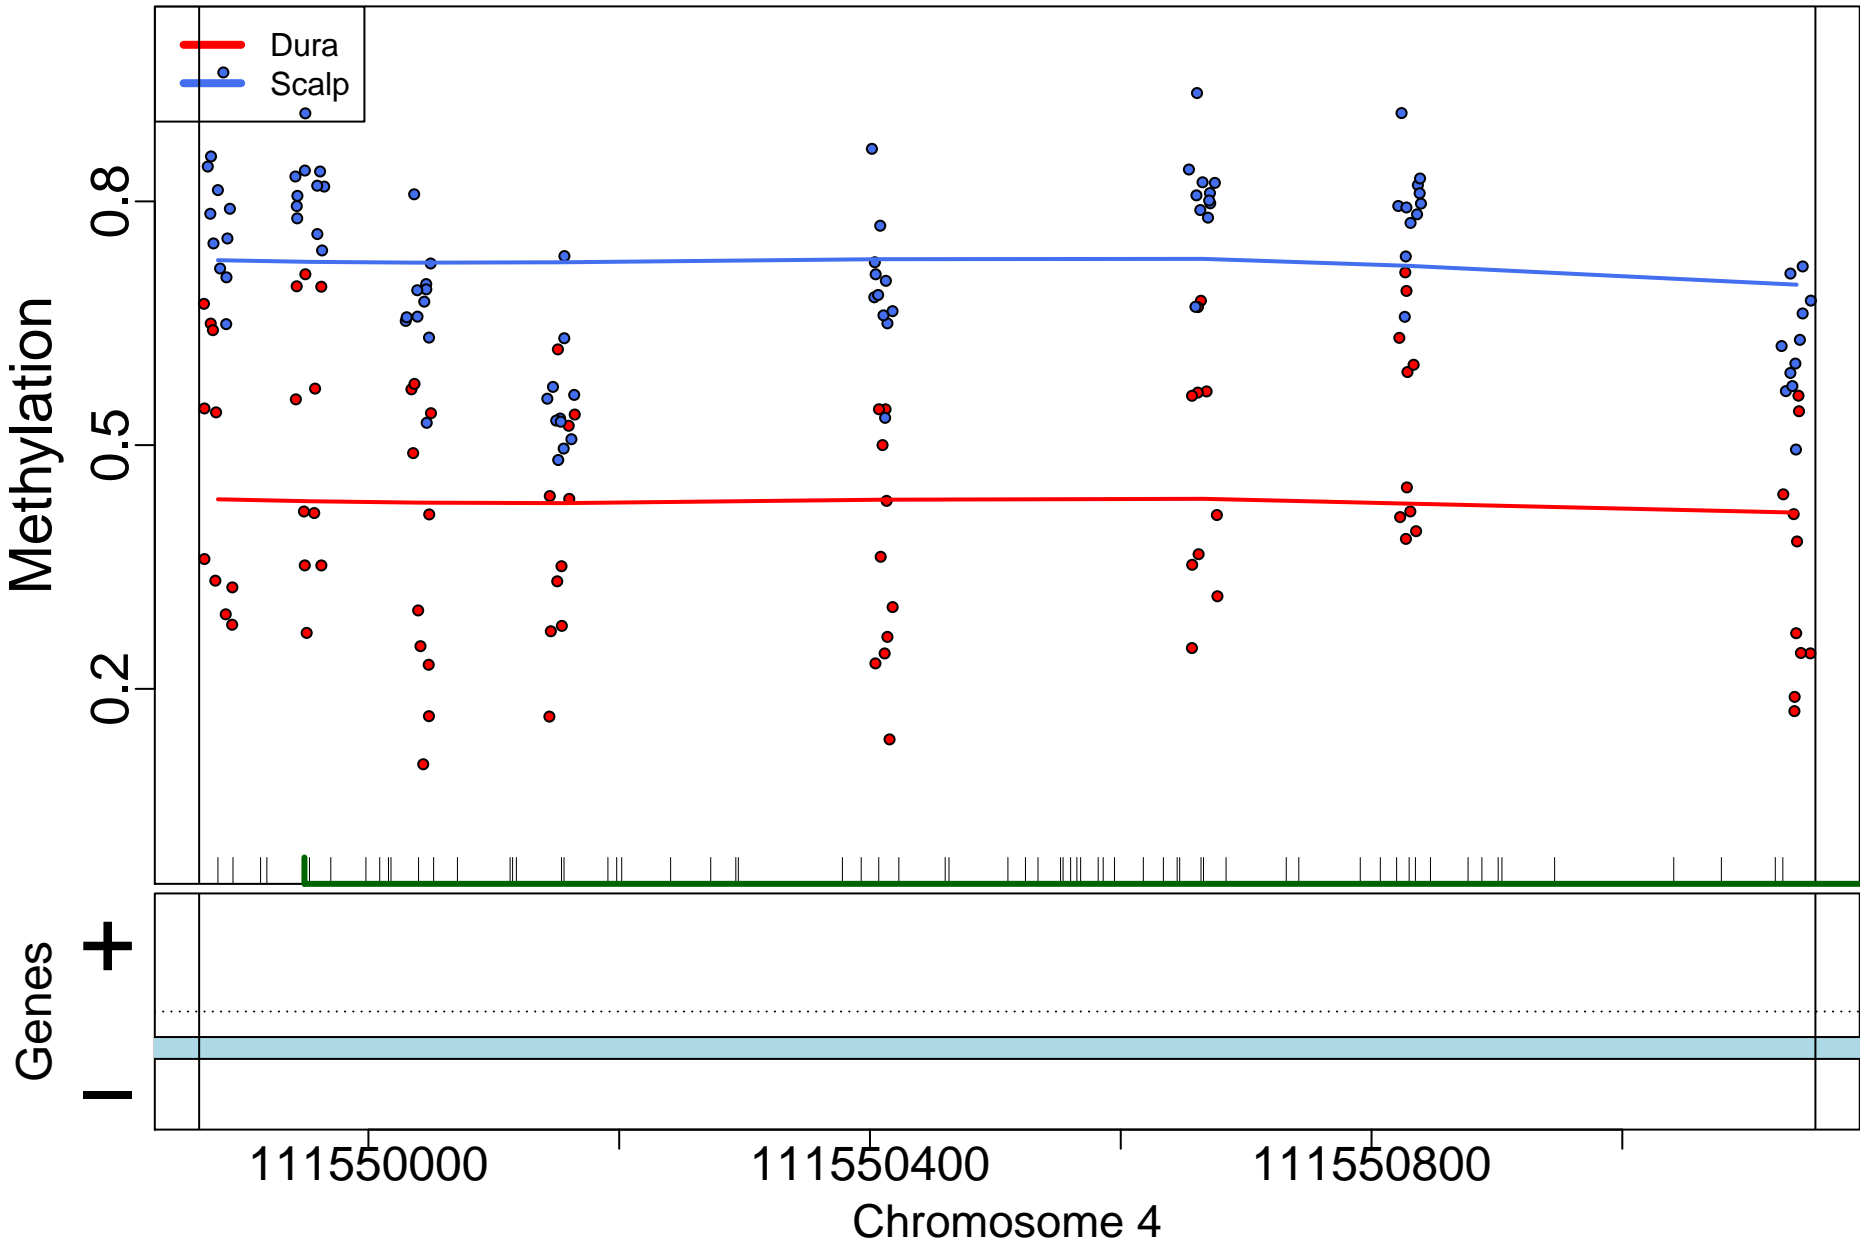

NR2F2; 15792bp from tss:downstream

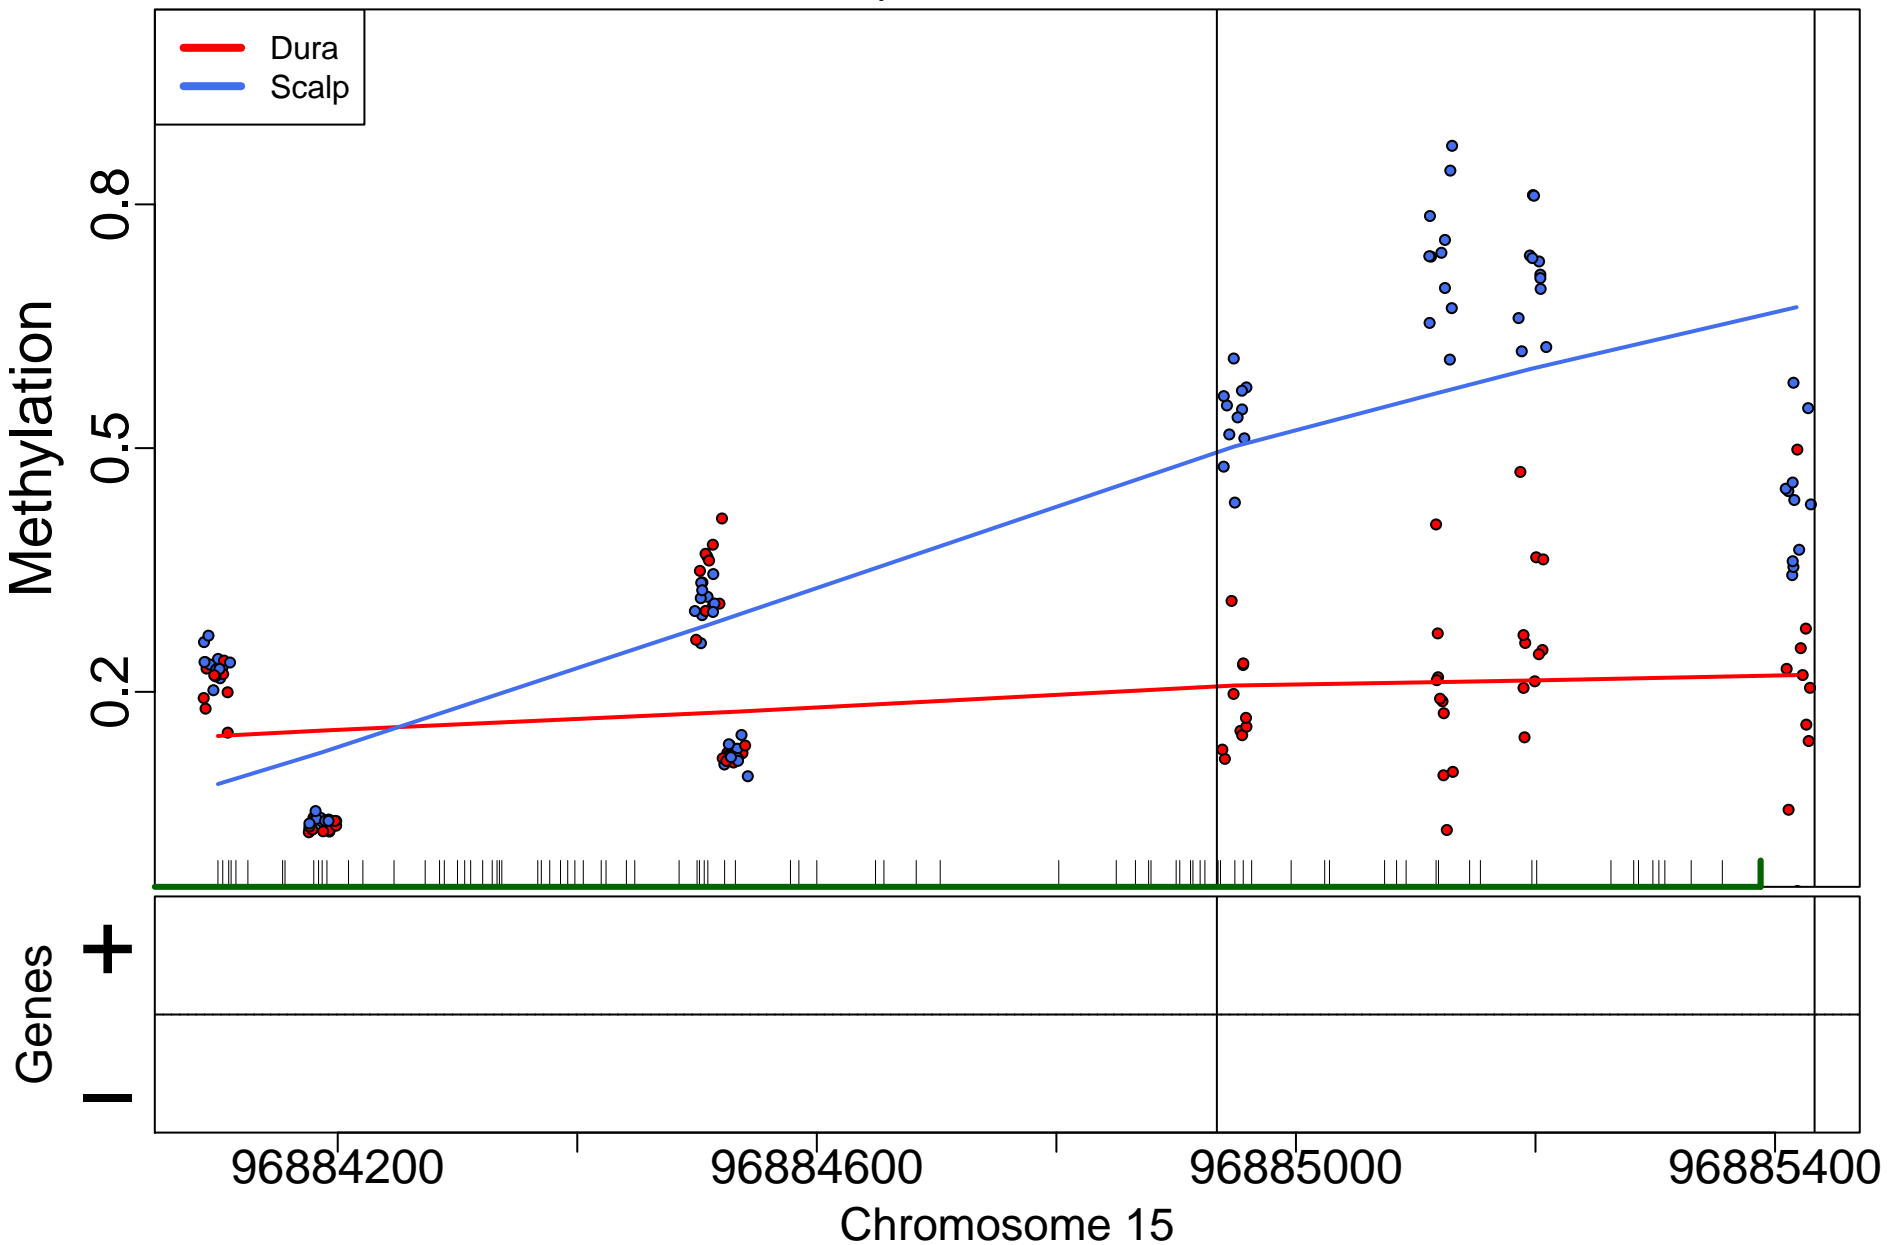



ZDHHC7; 0bp from tss:NA

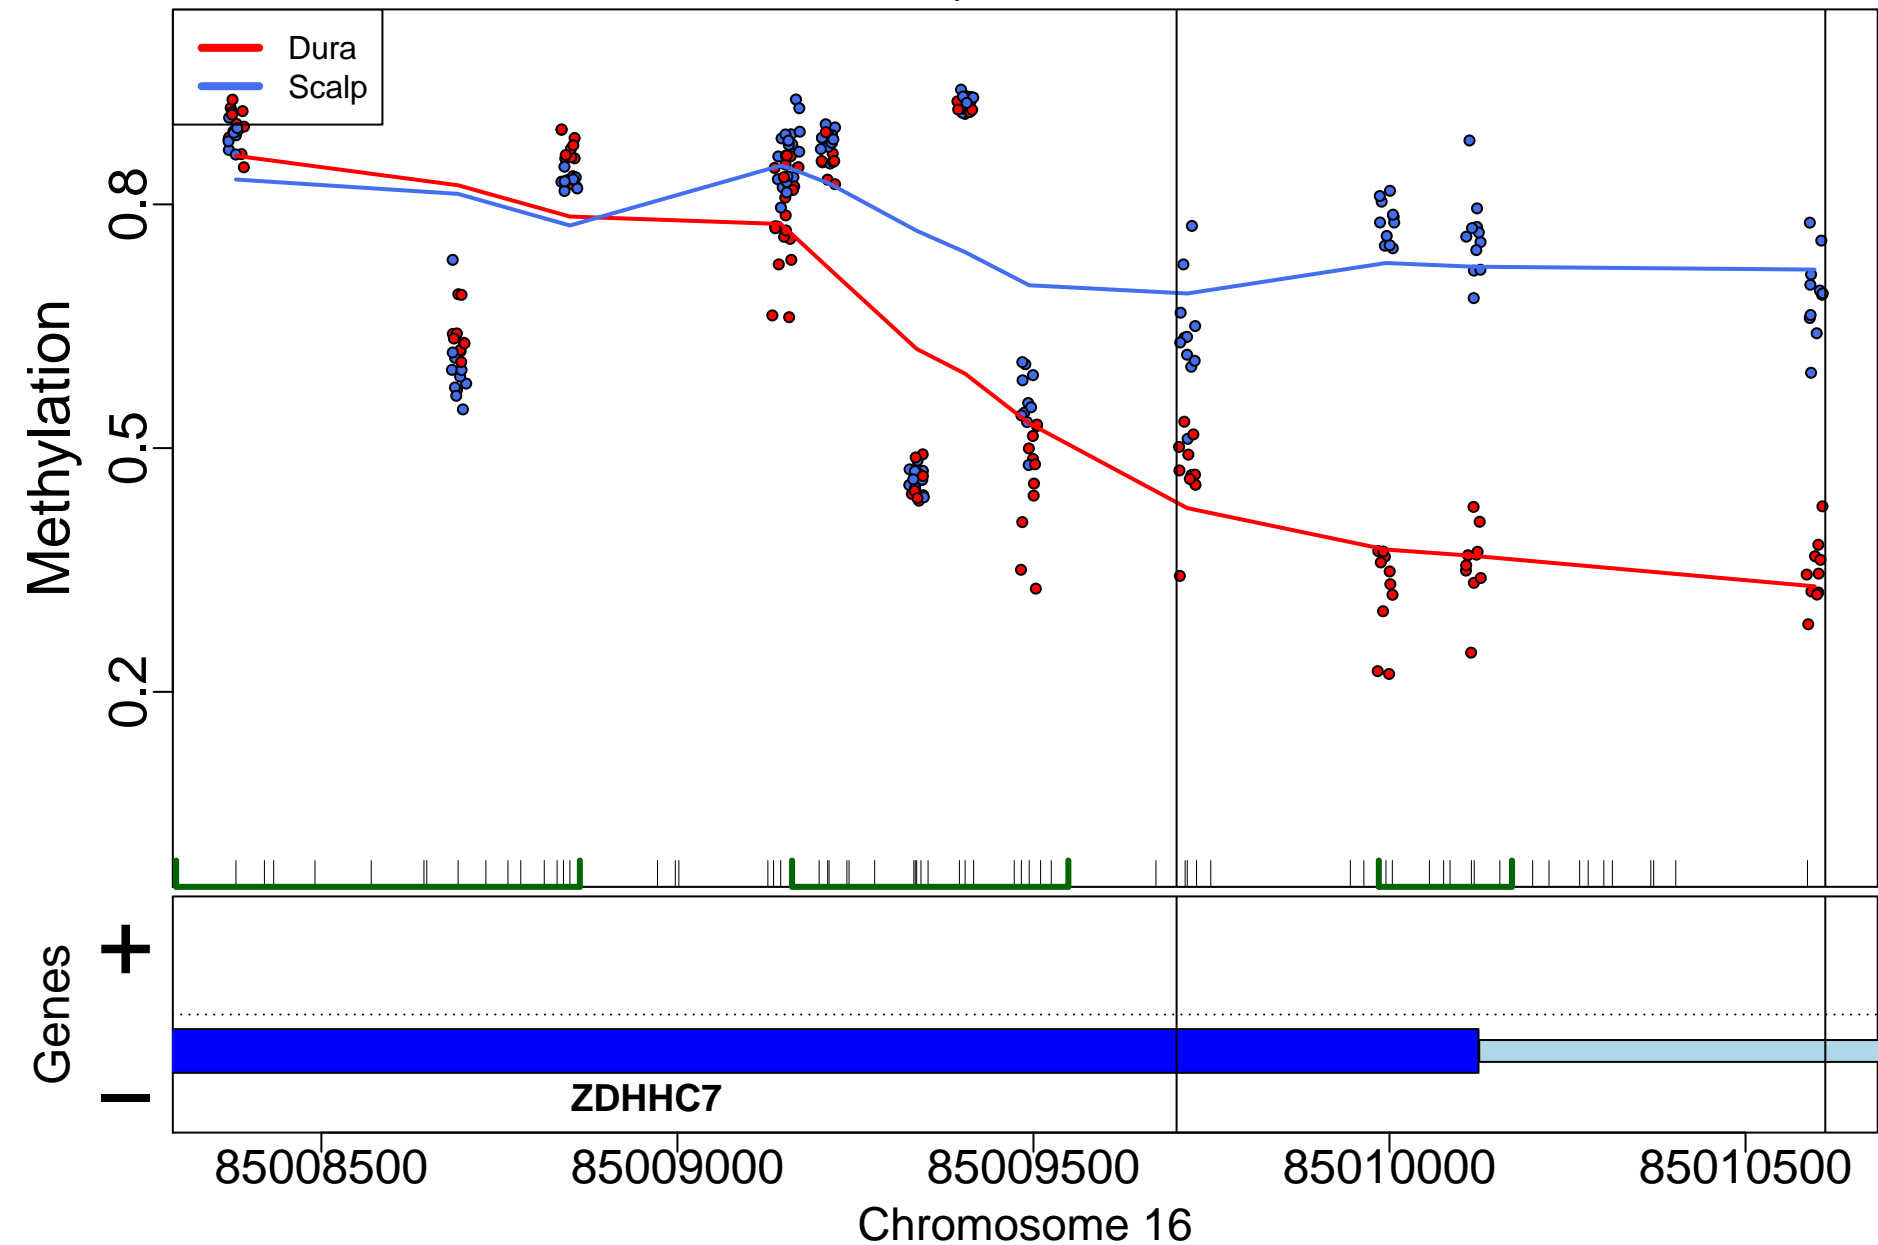

# BEST4; 1054bp from tss:promoter

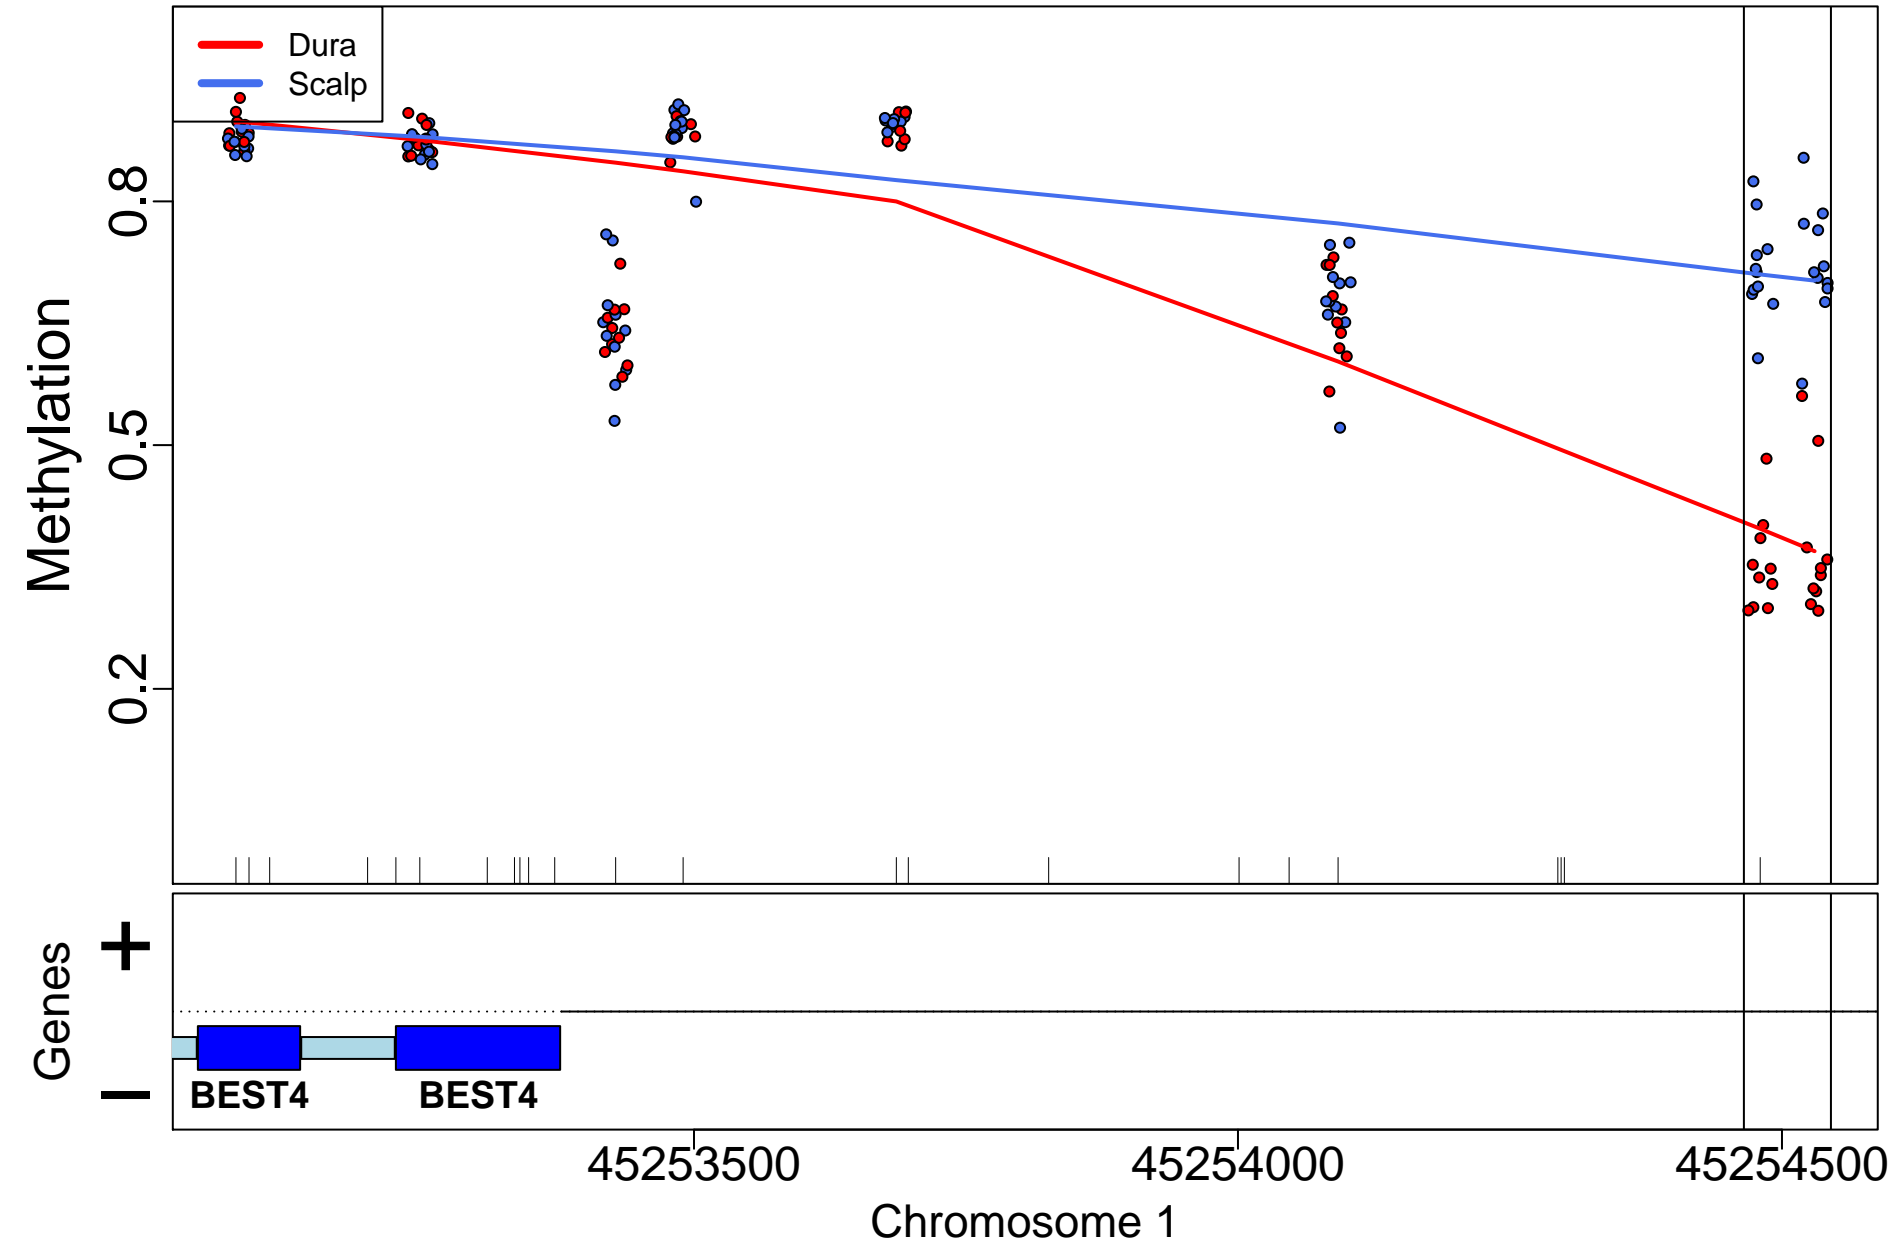

DEPTOR; 351bp from tss:promoter

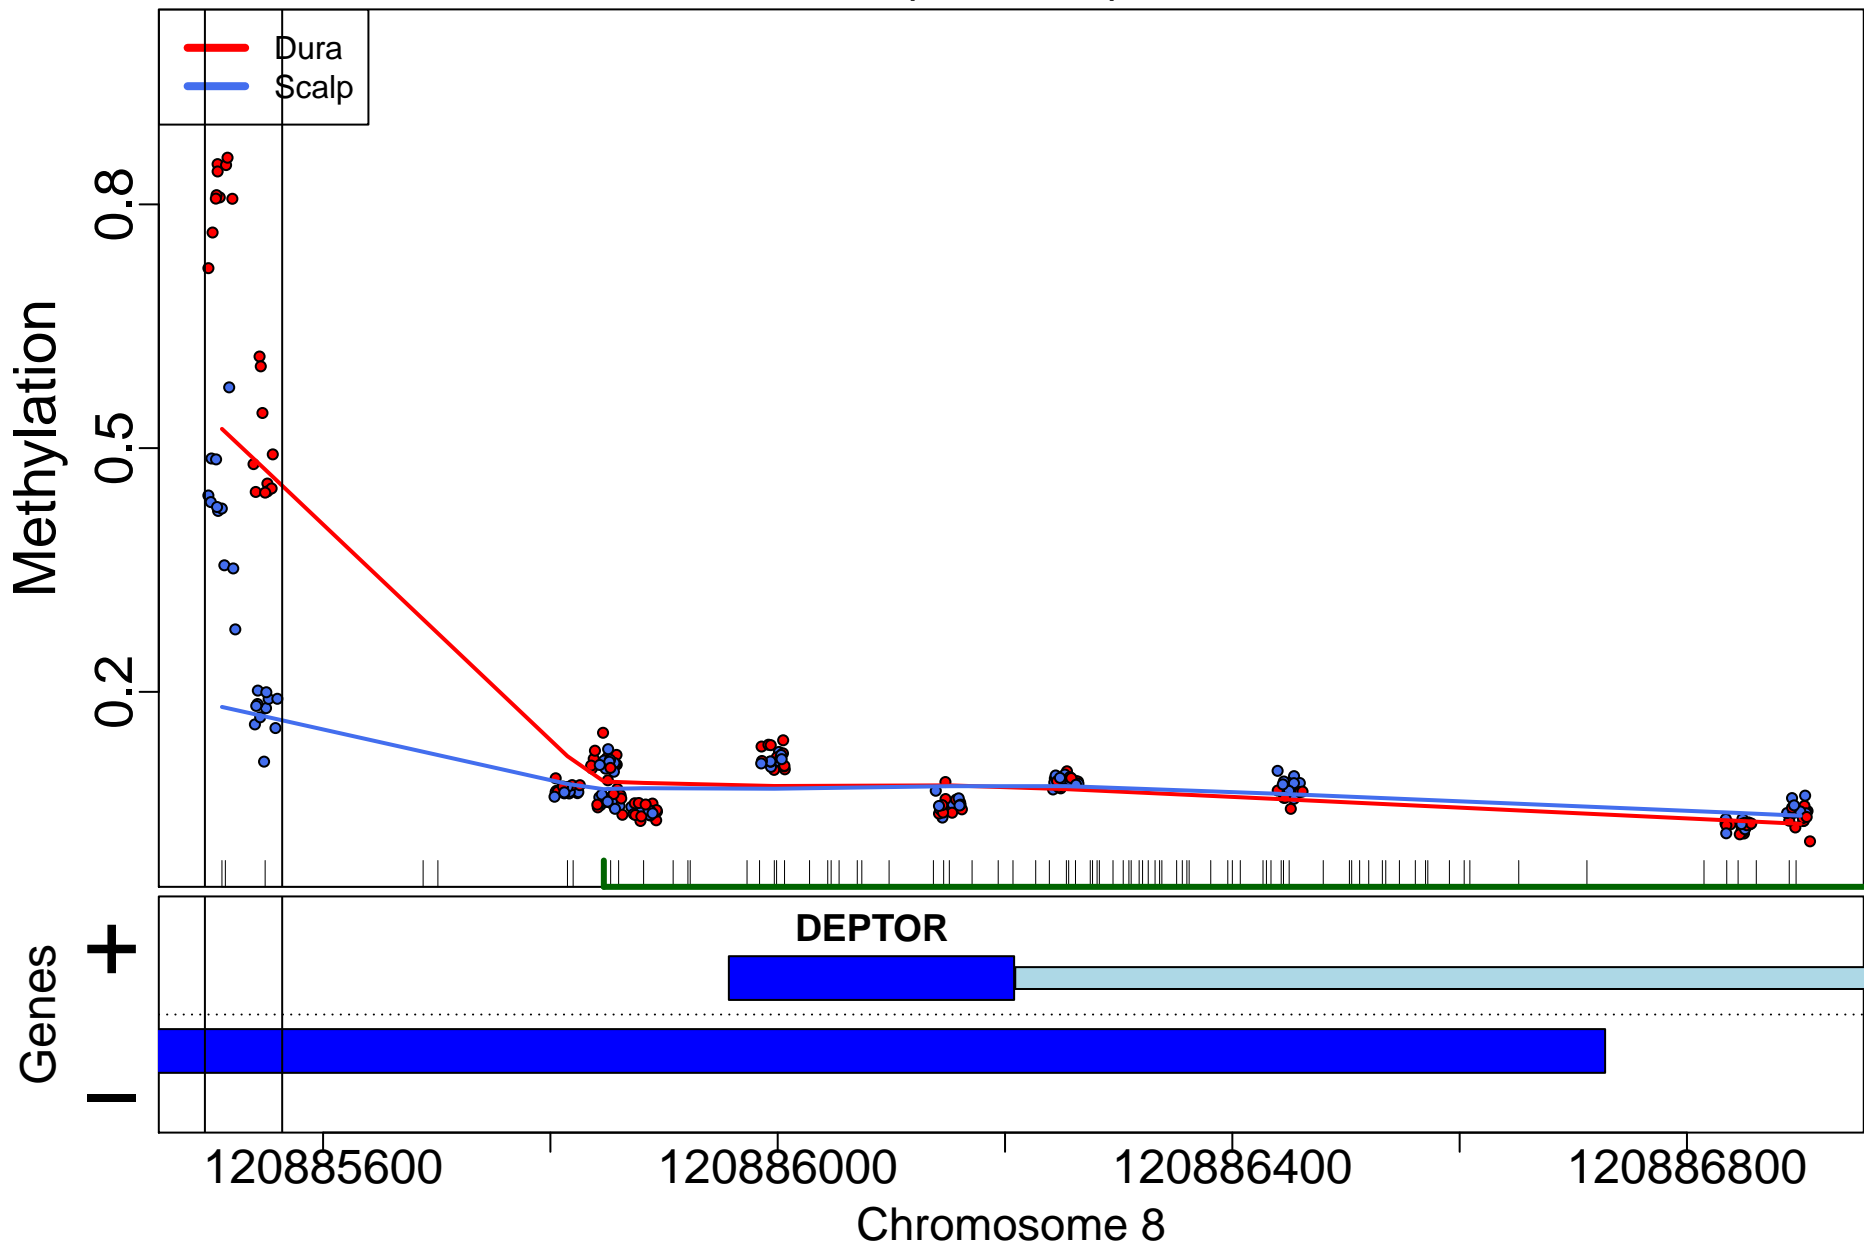

## HOXD-AS1; 0bp from tss:NA

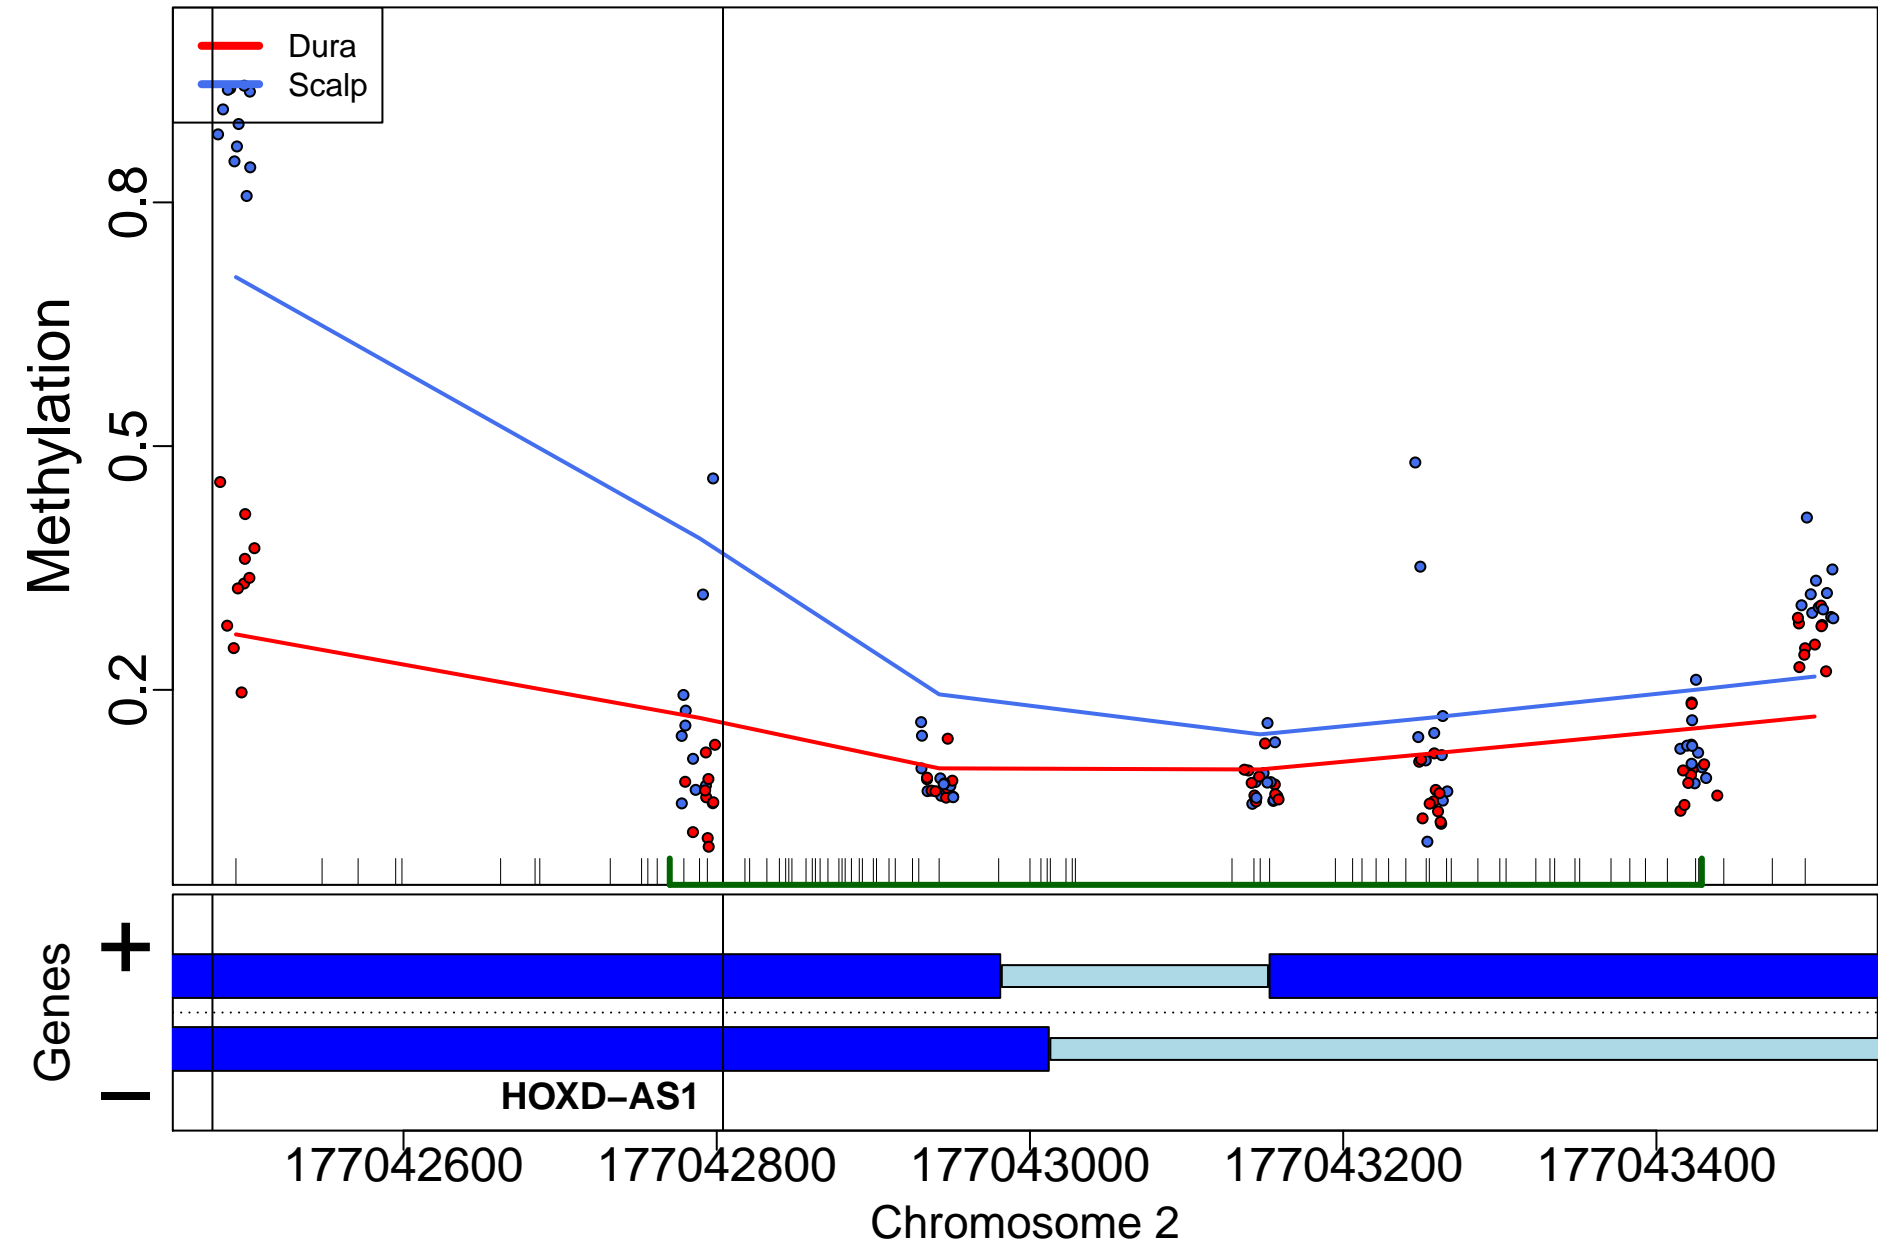

MCF2L; 0bp from tss:overlaps 5'

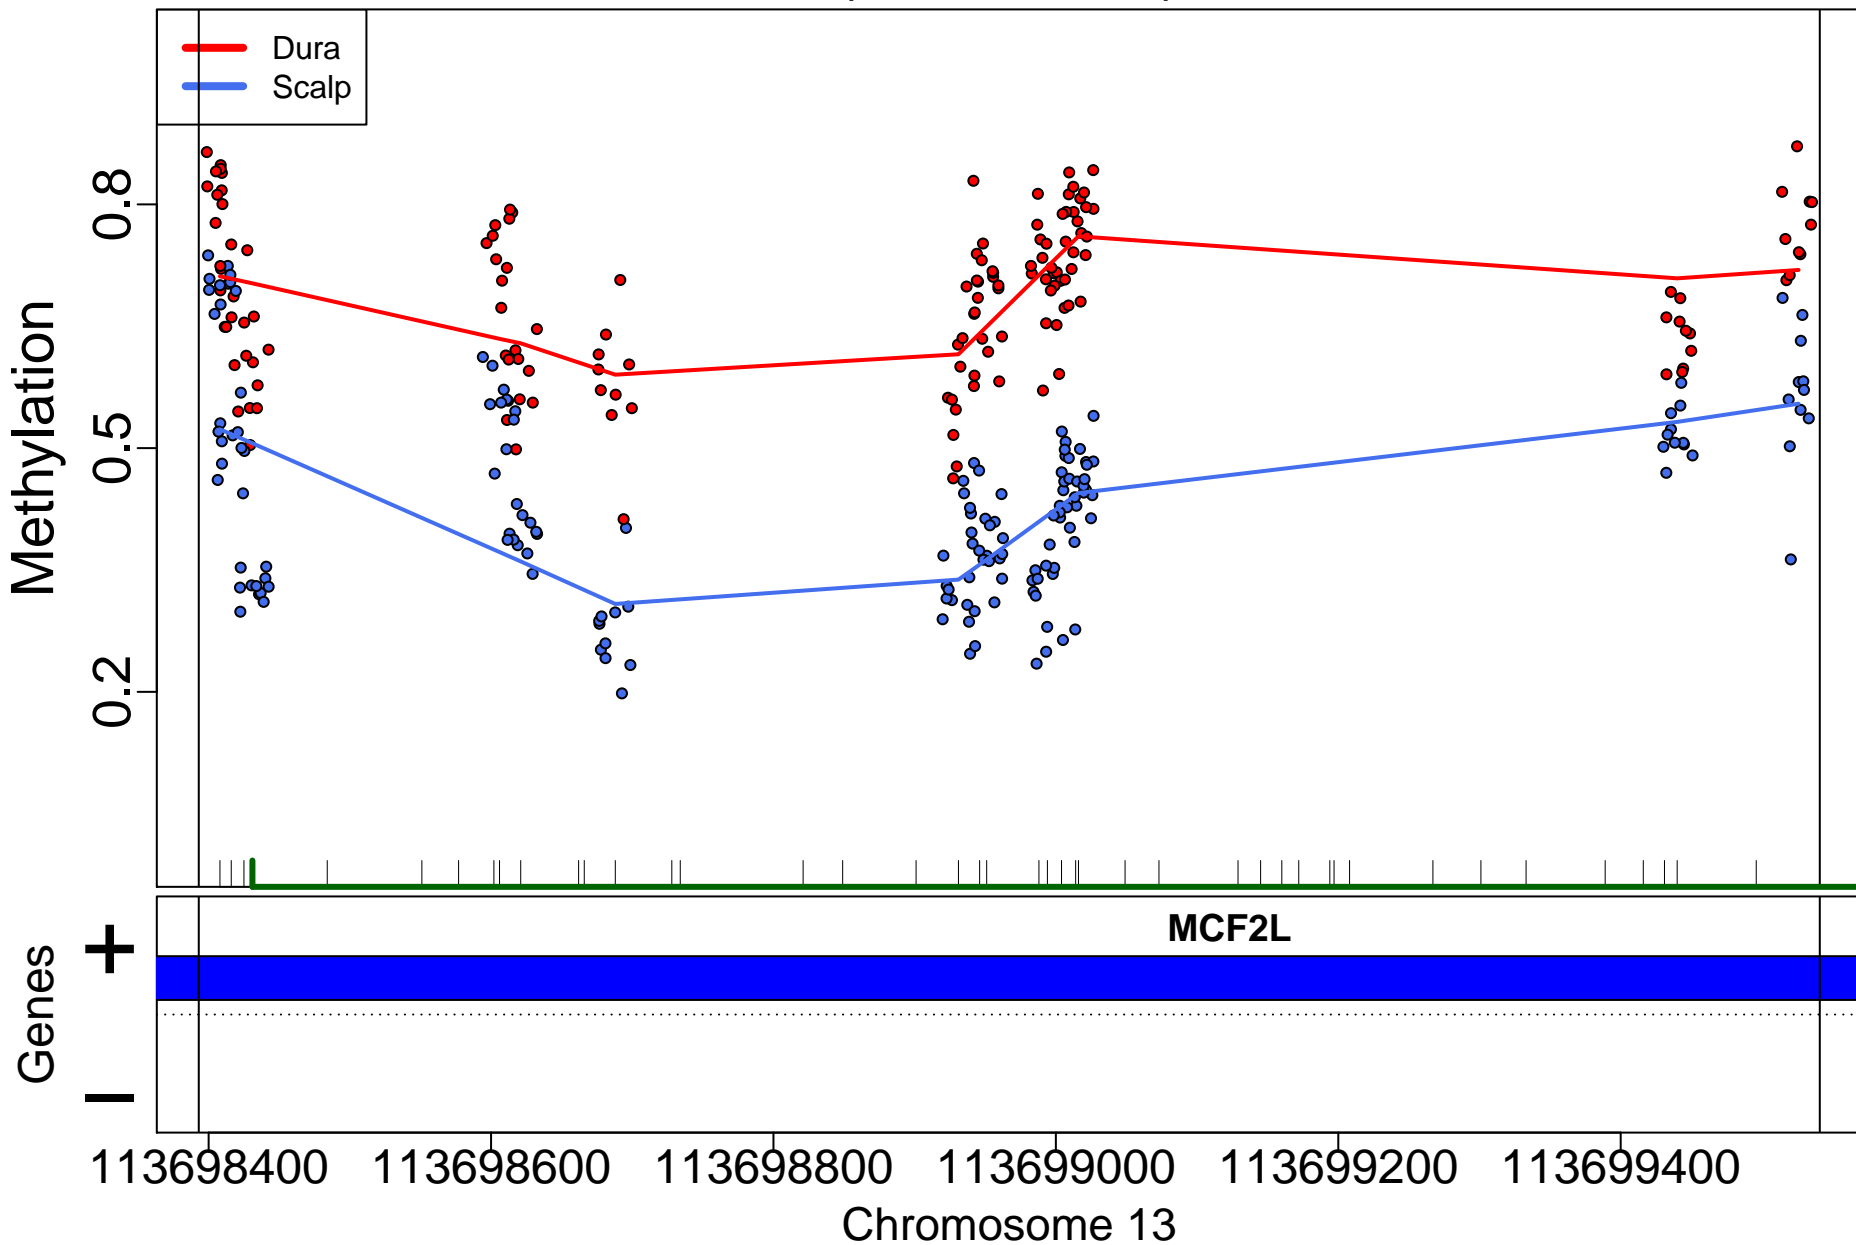

## SOX2-OT; 0bp from tss:NA

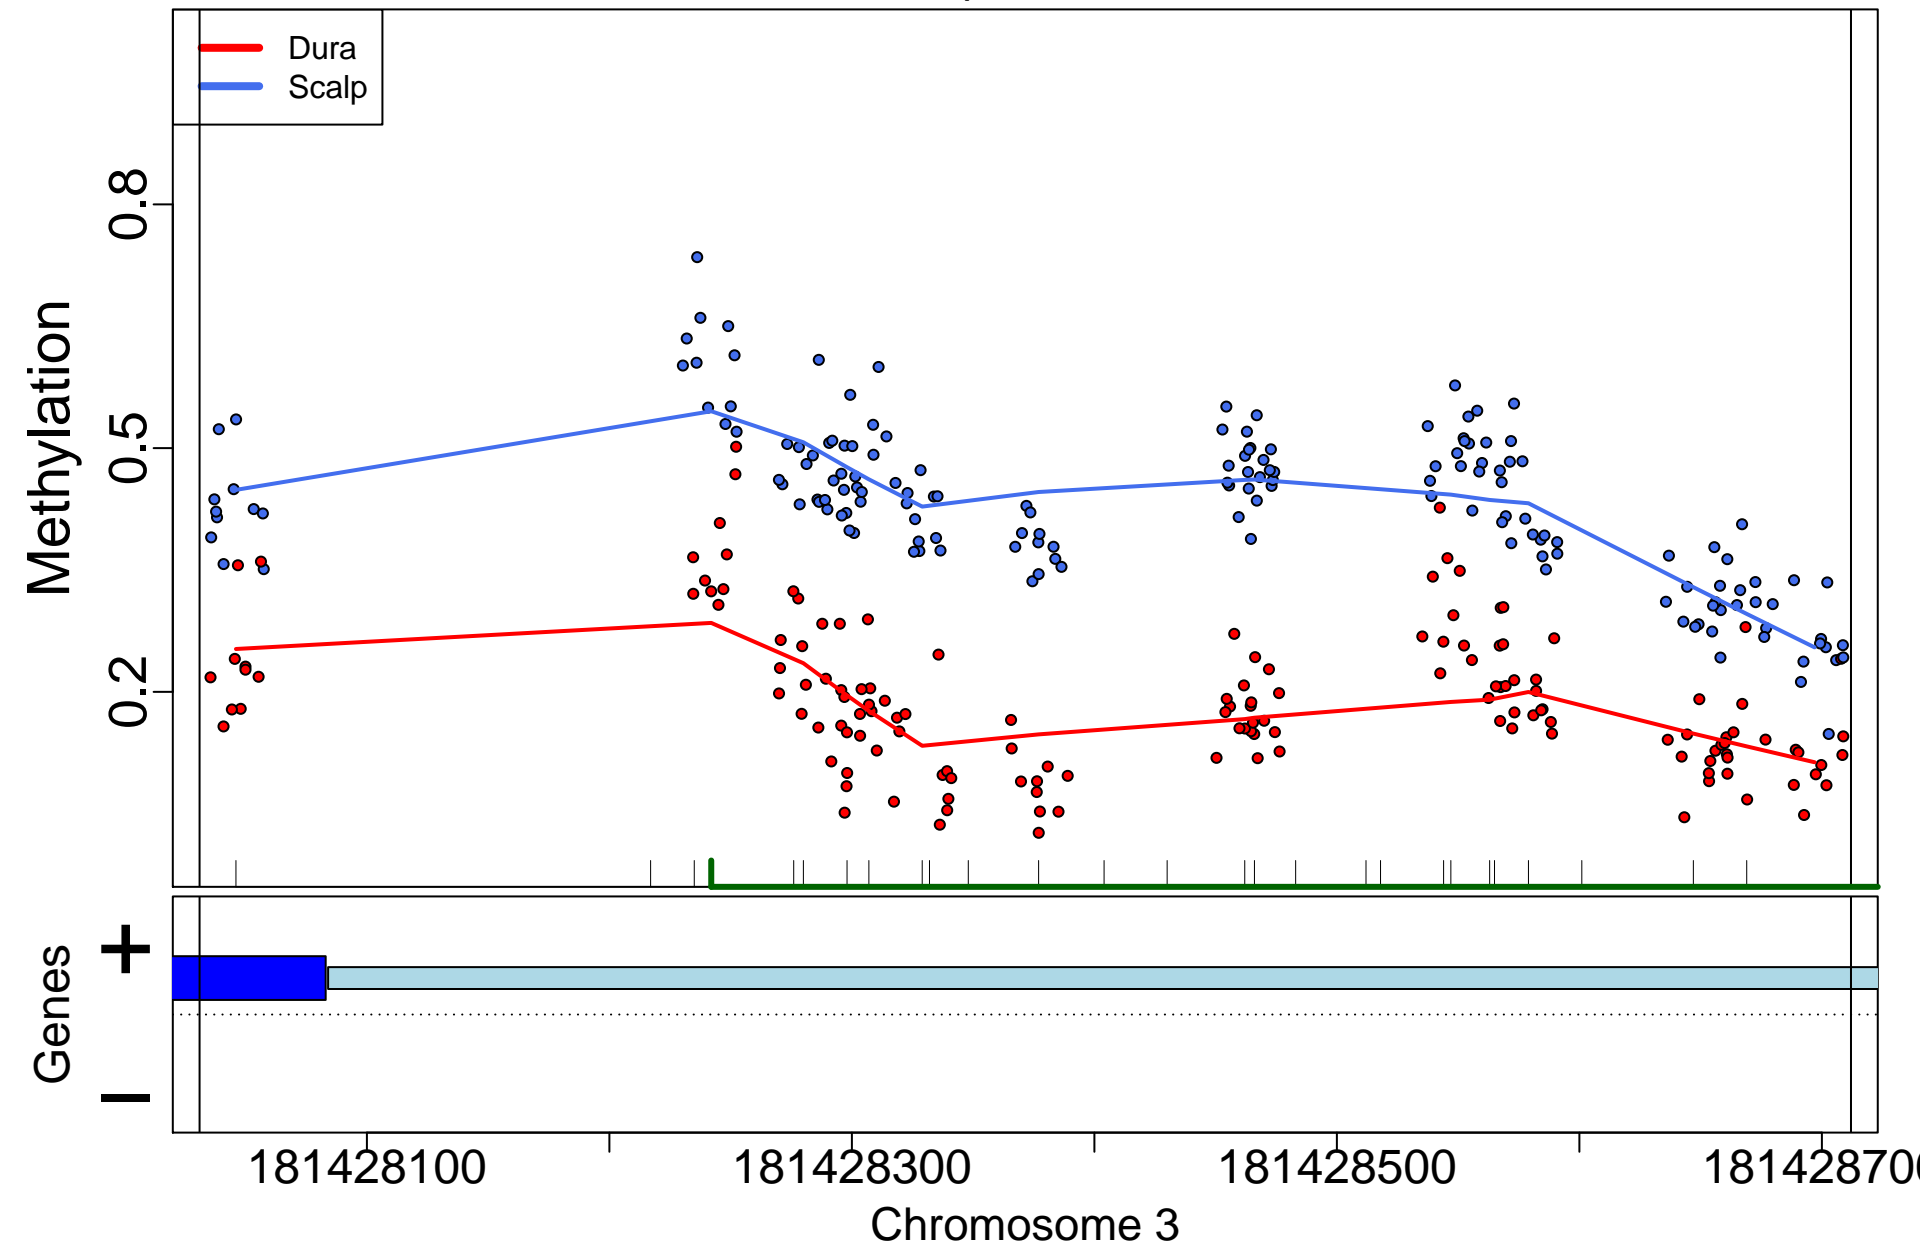

MEIS1; 0bp from tss:overlaps 5'

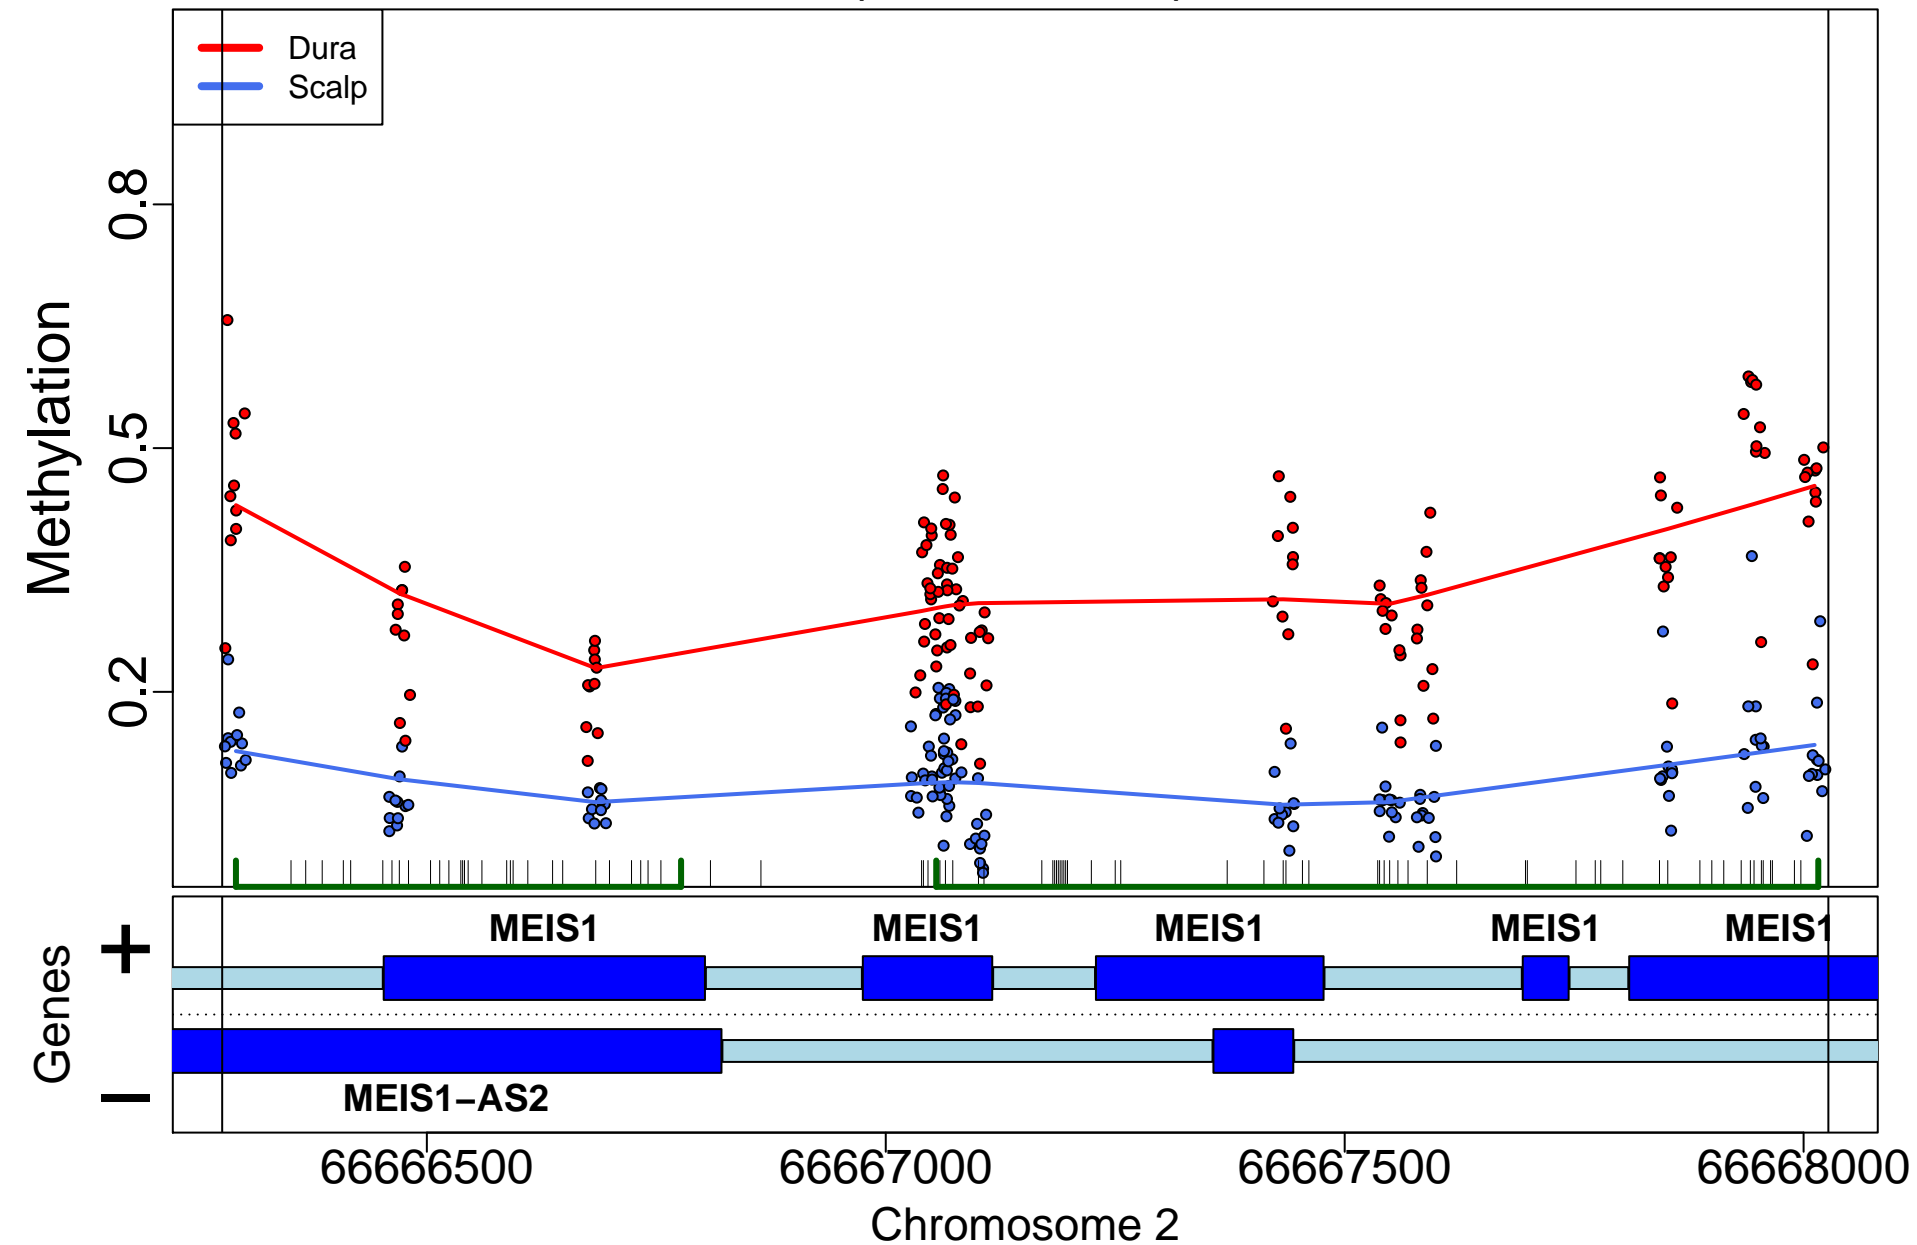

GSC; 2172bp from tss:promoter

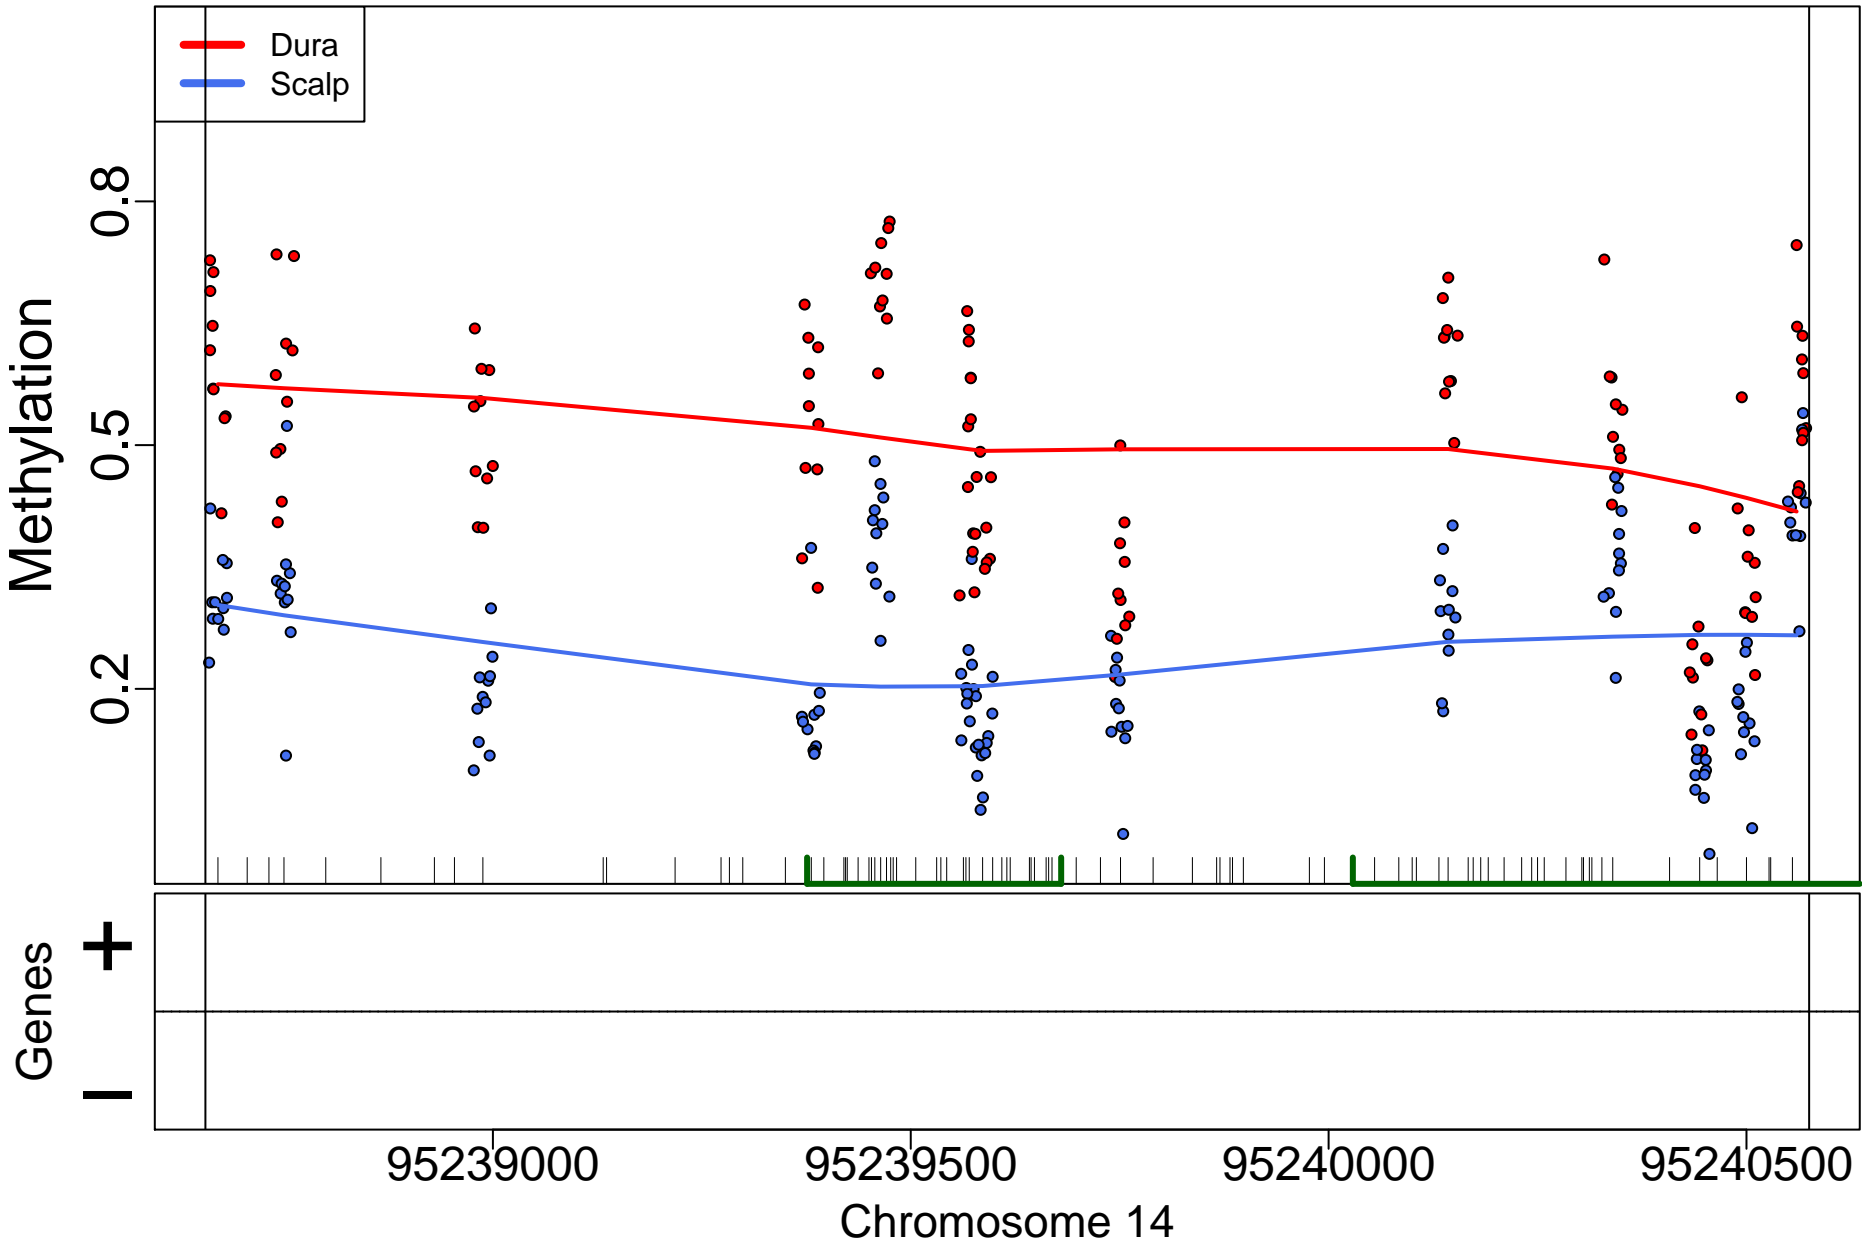



# B3GNTL1; 38794bp from tss:inside intron

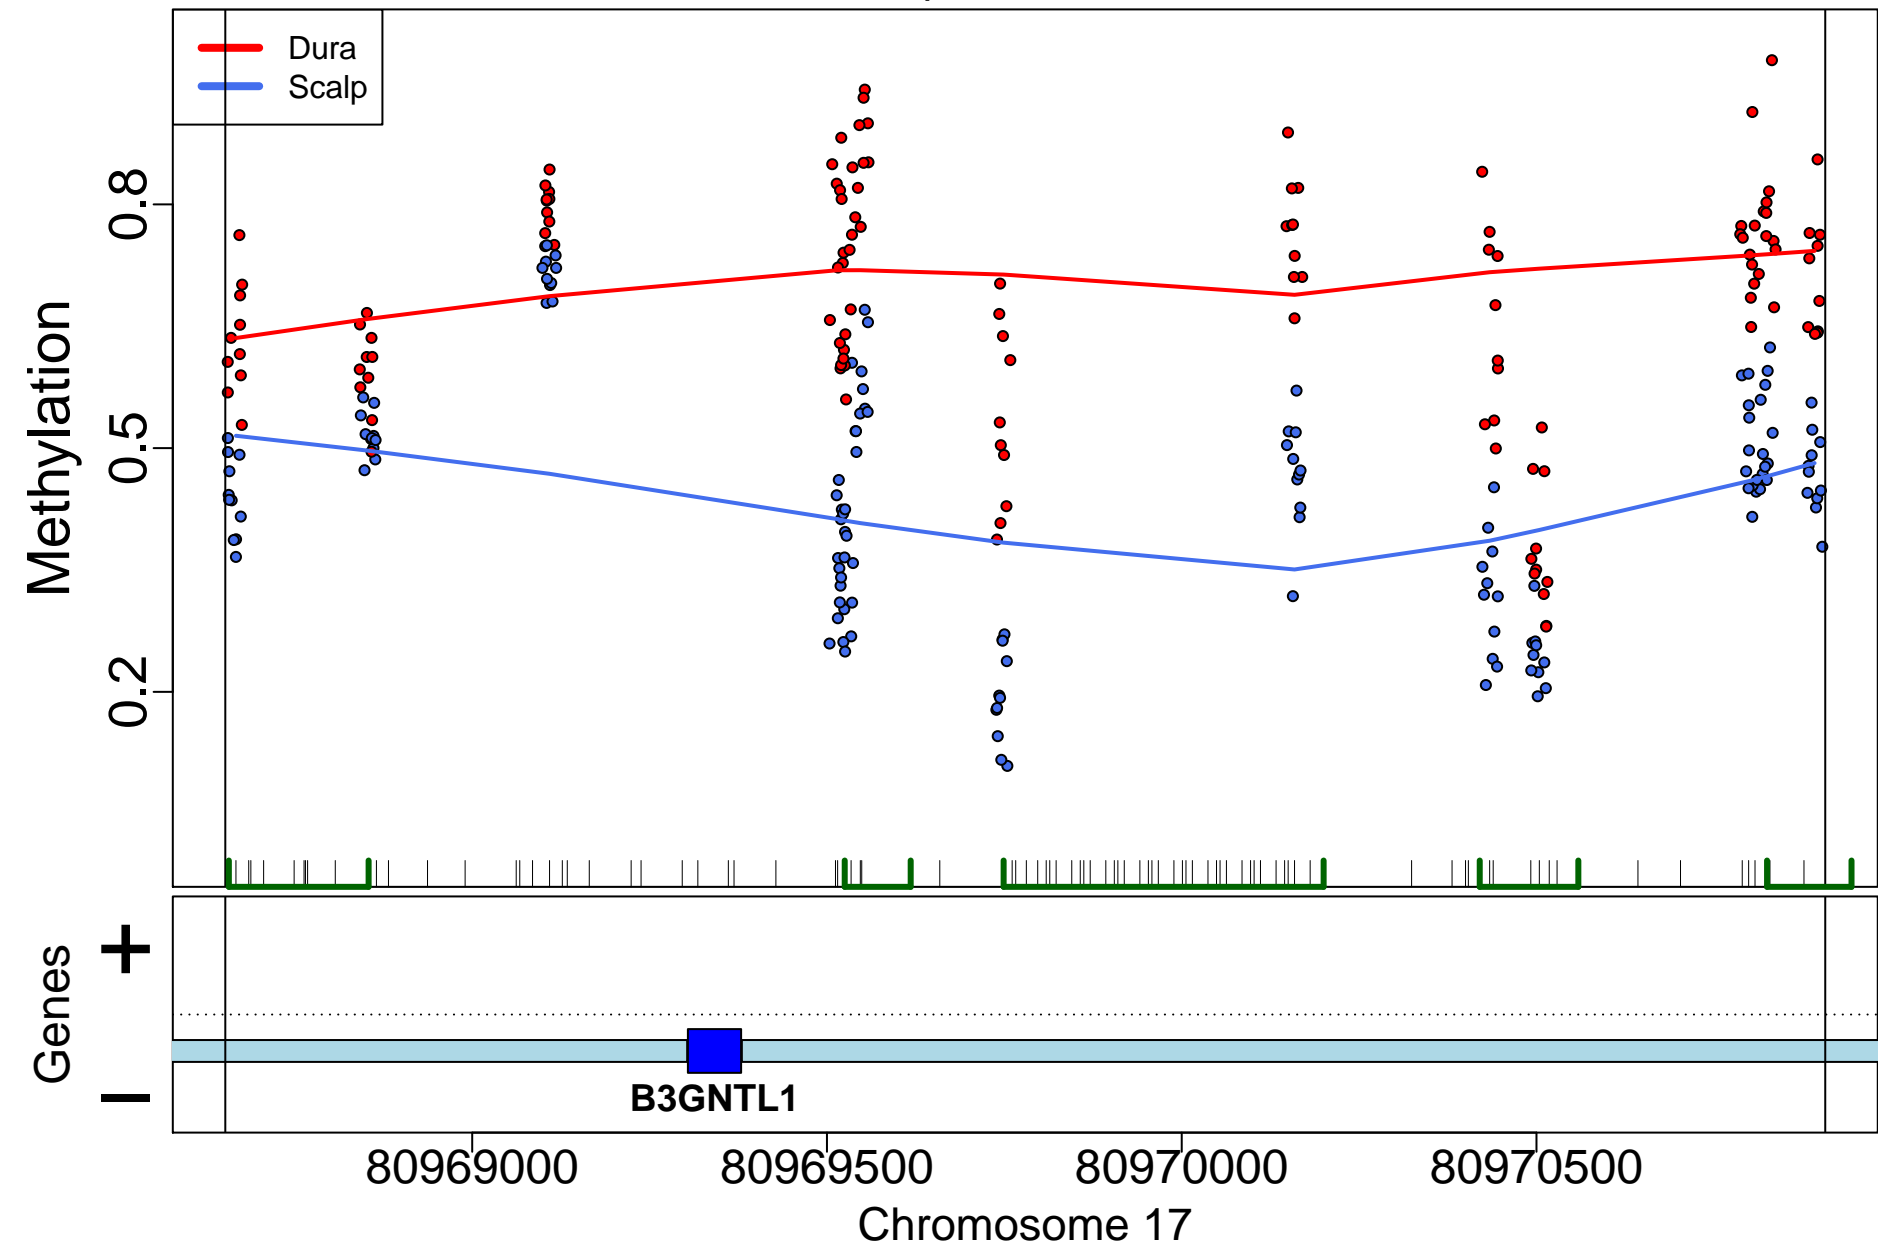

MIRLET7BHG; 0bp from tss:NA

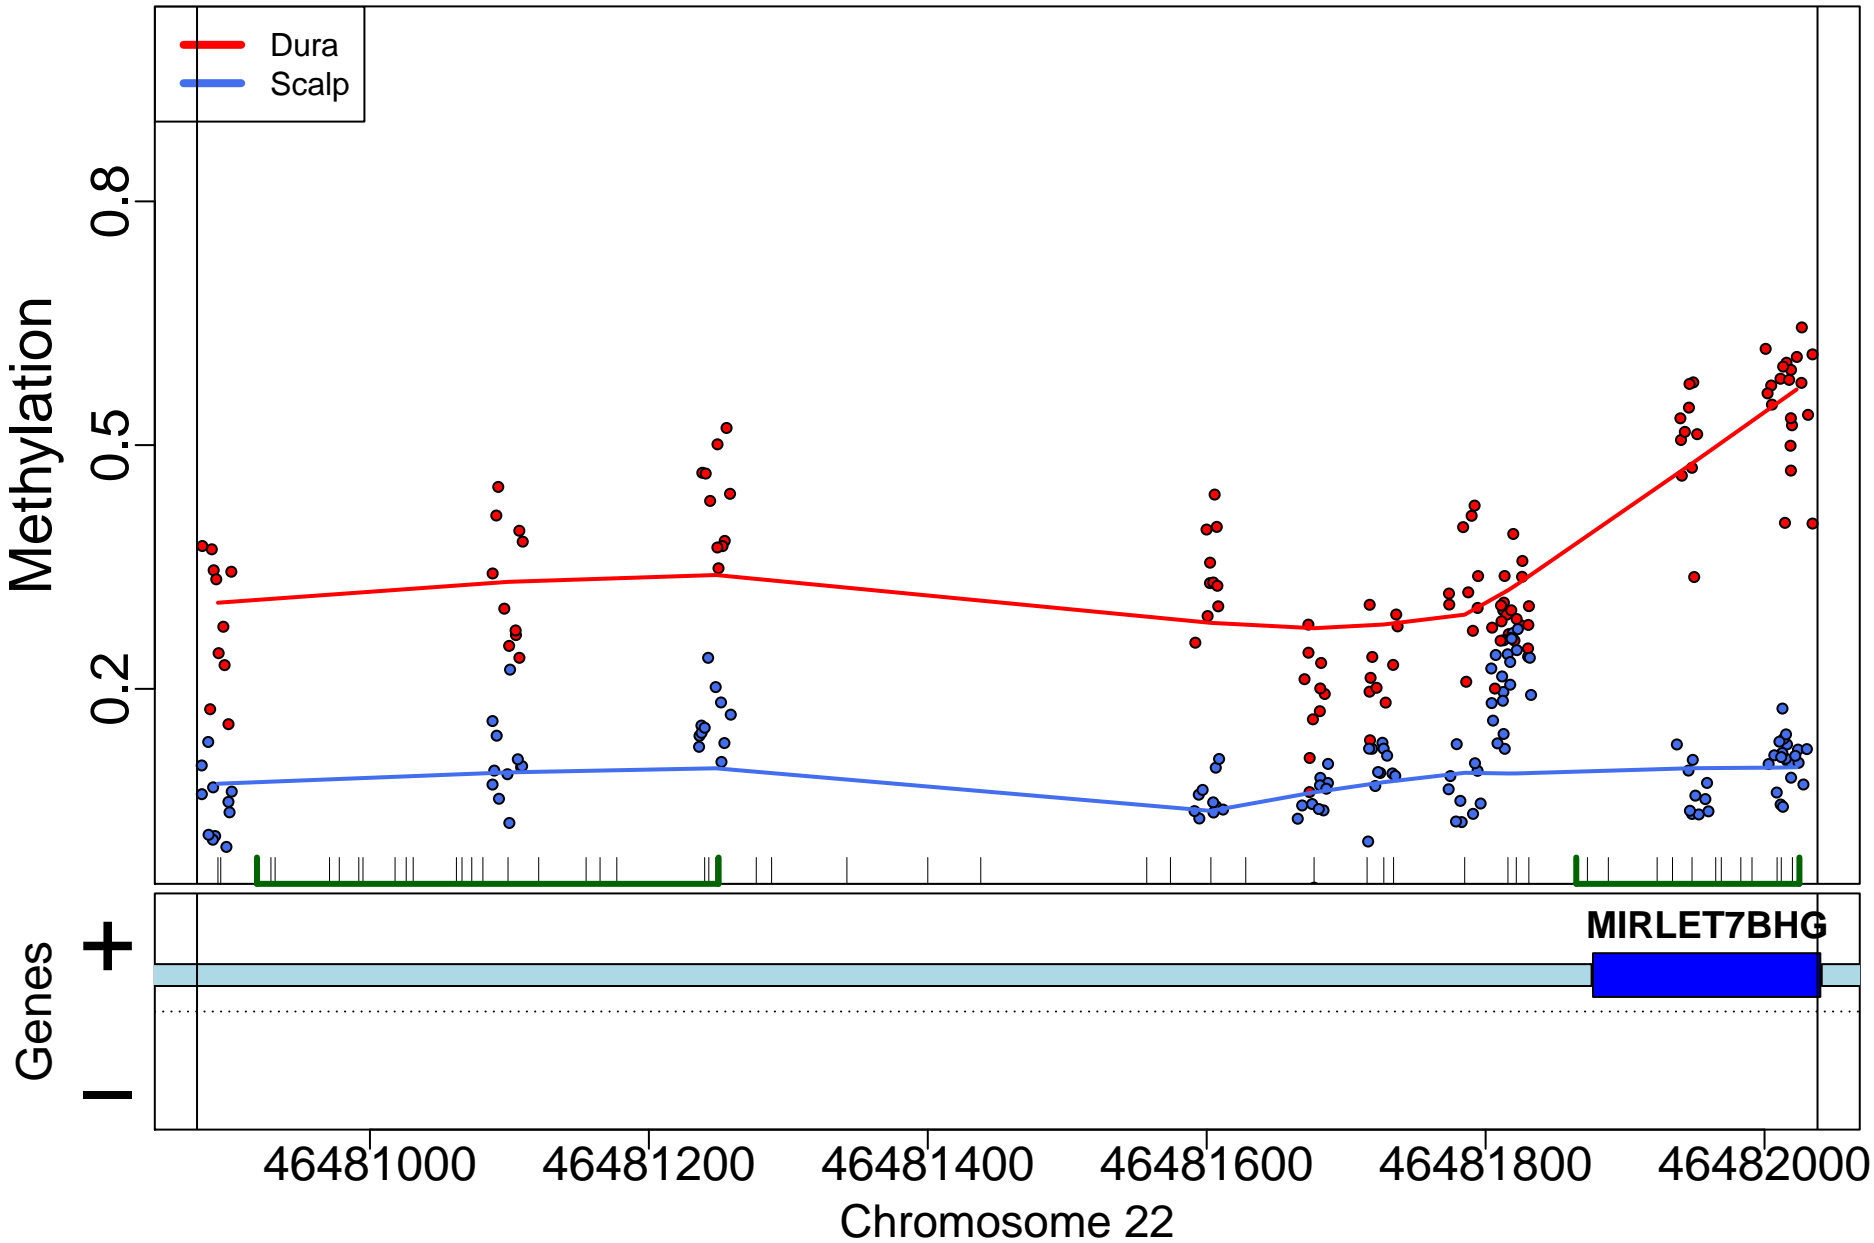

## NR2F1; 8589bp from tss:overlaps 3'

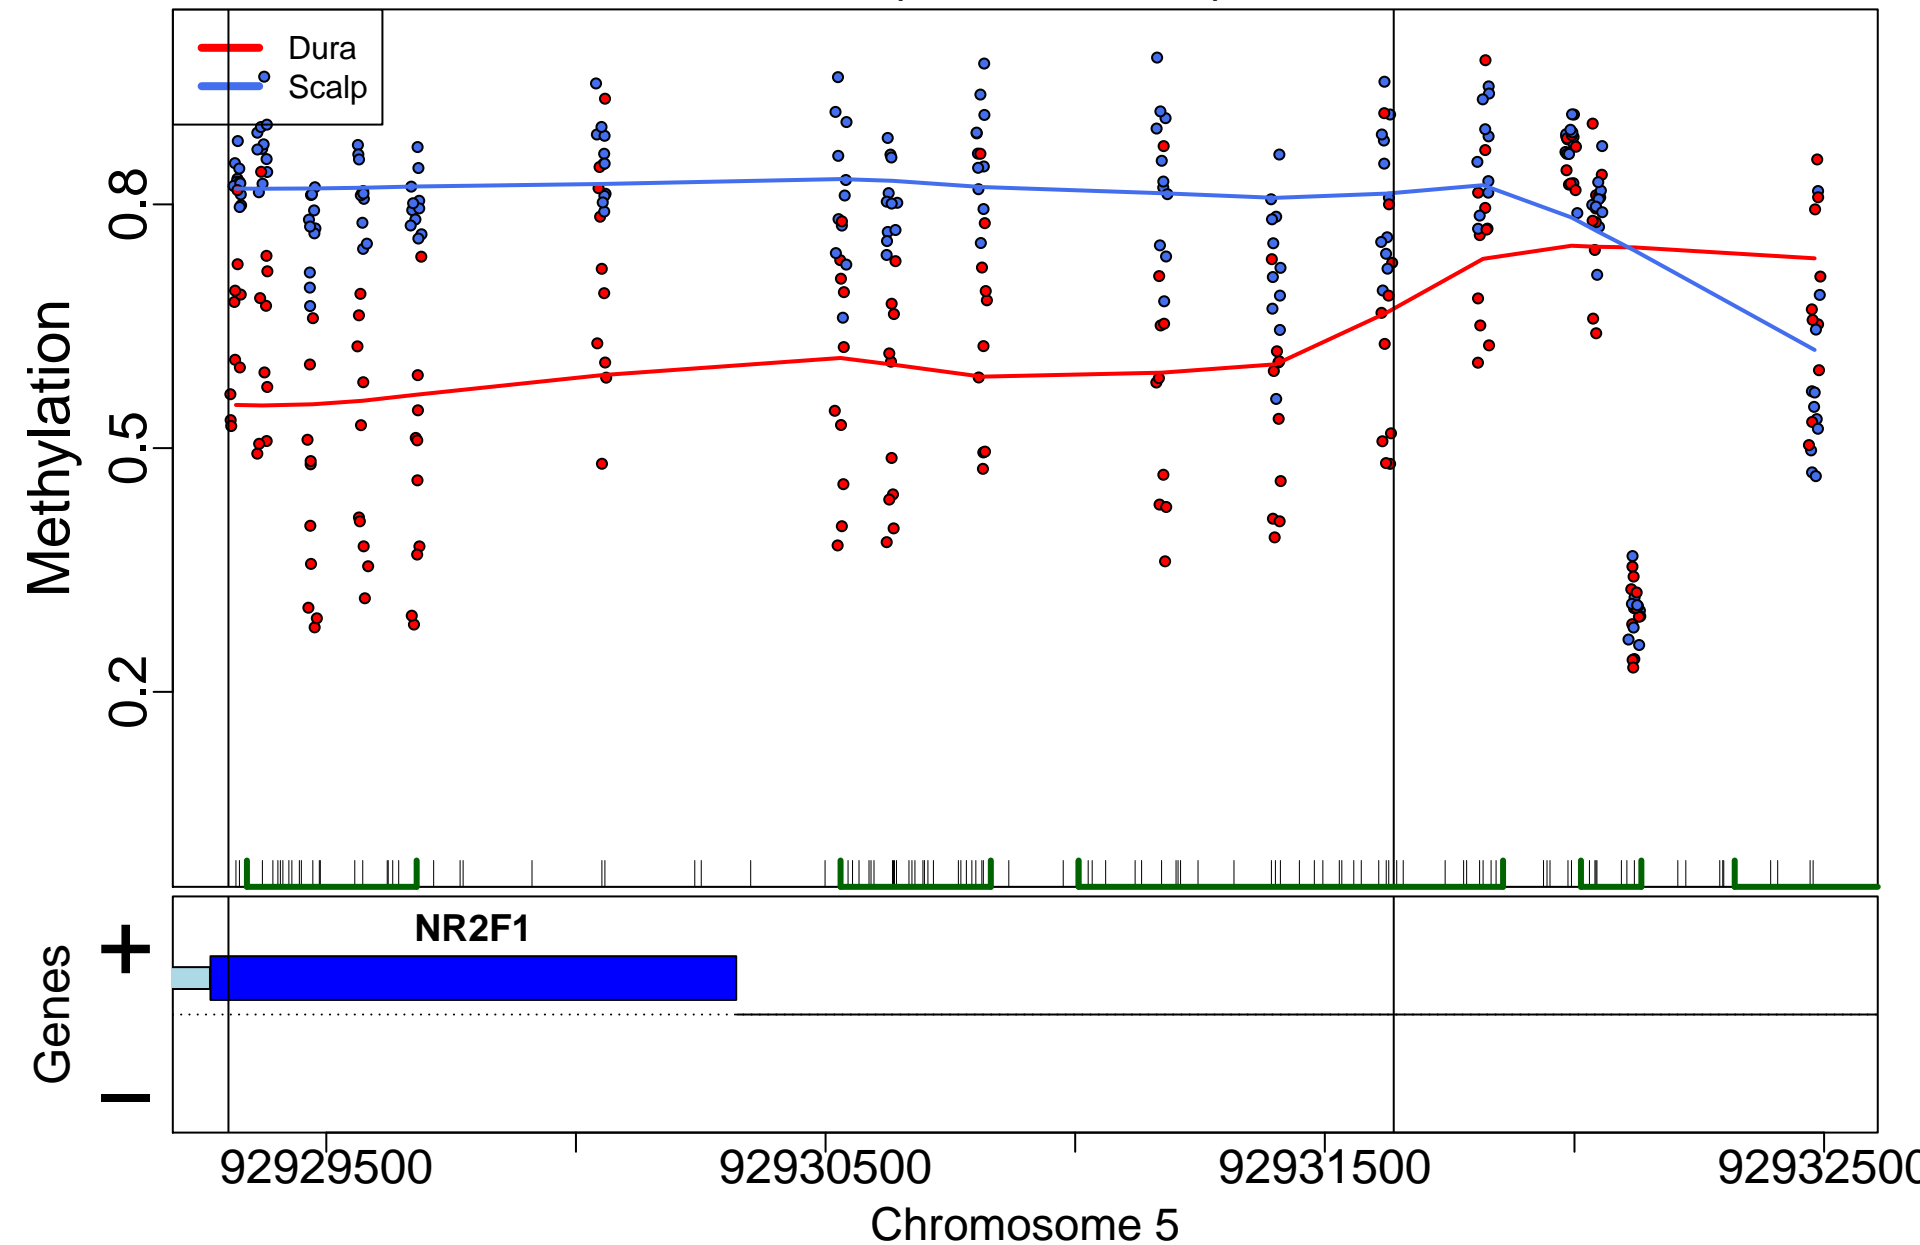

PROX1; 7806bp from tss:upstream

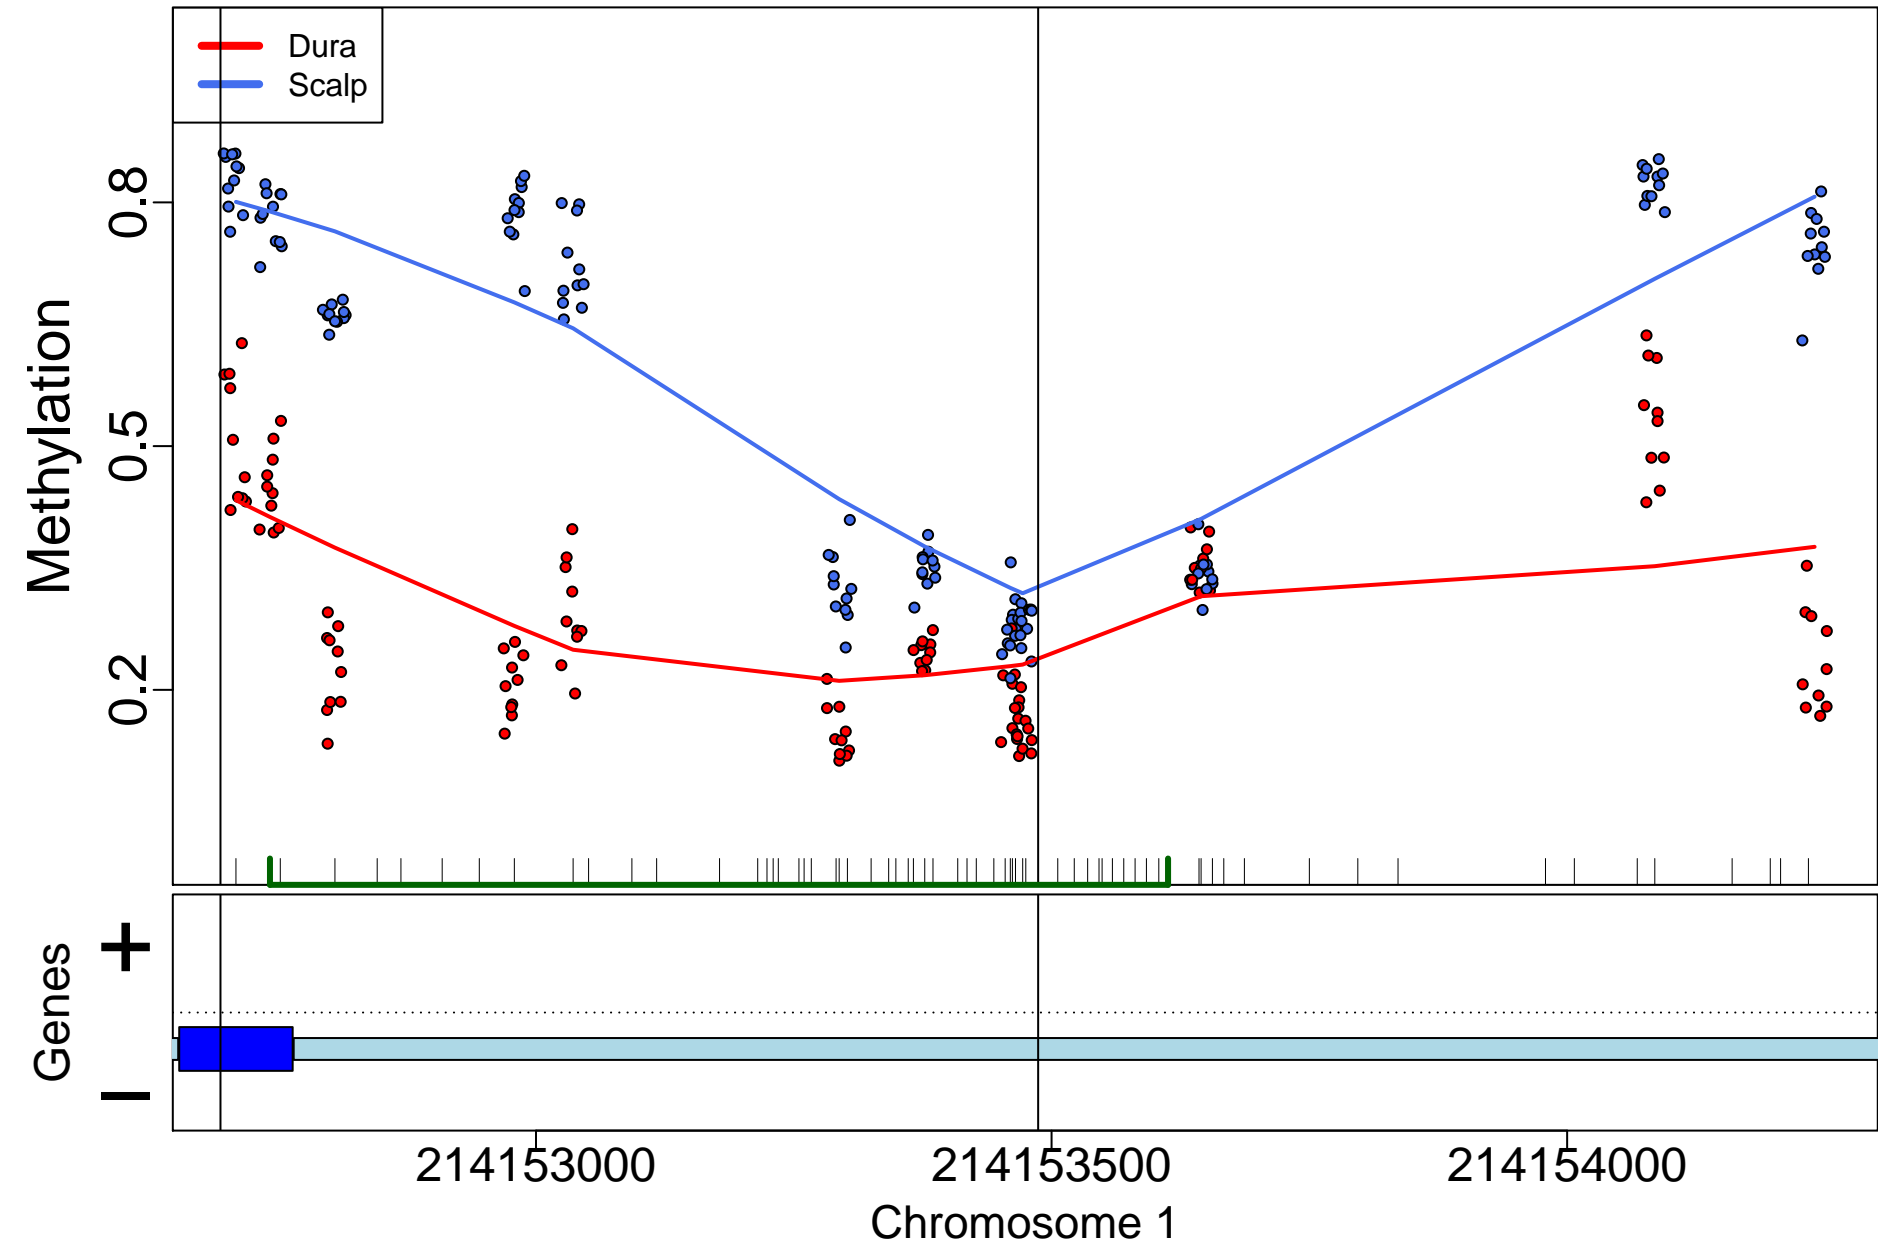

USP36; 18214bp from tss:inside intron

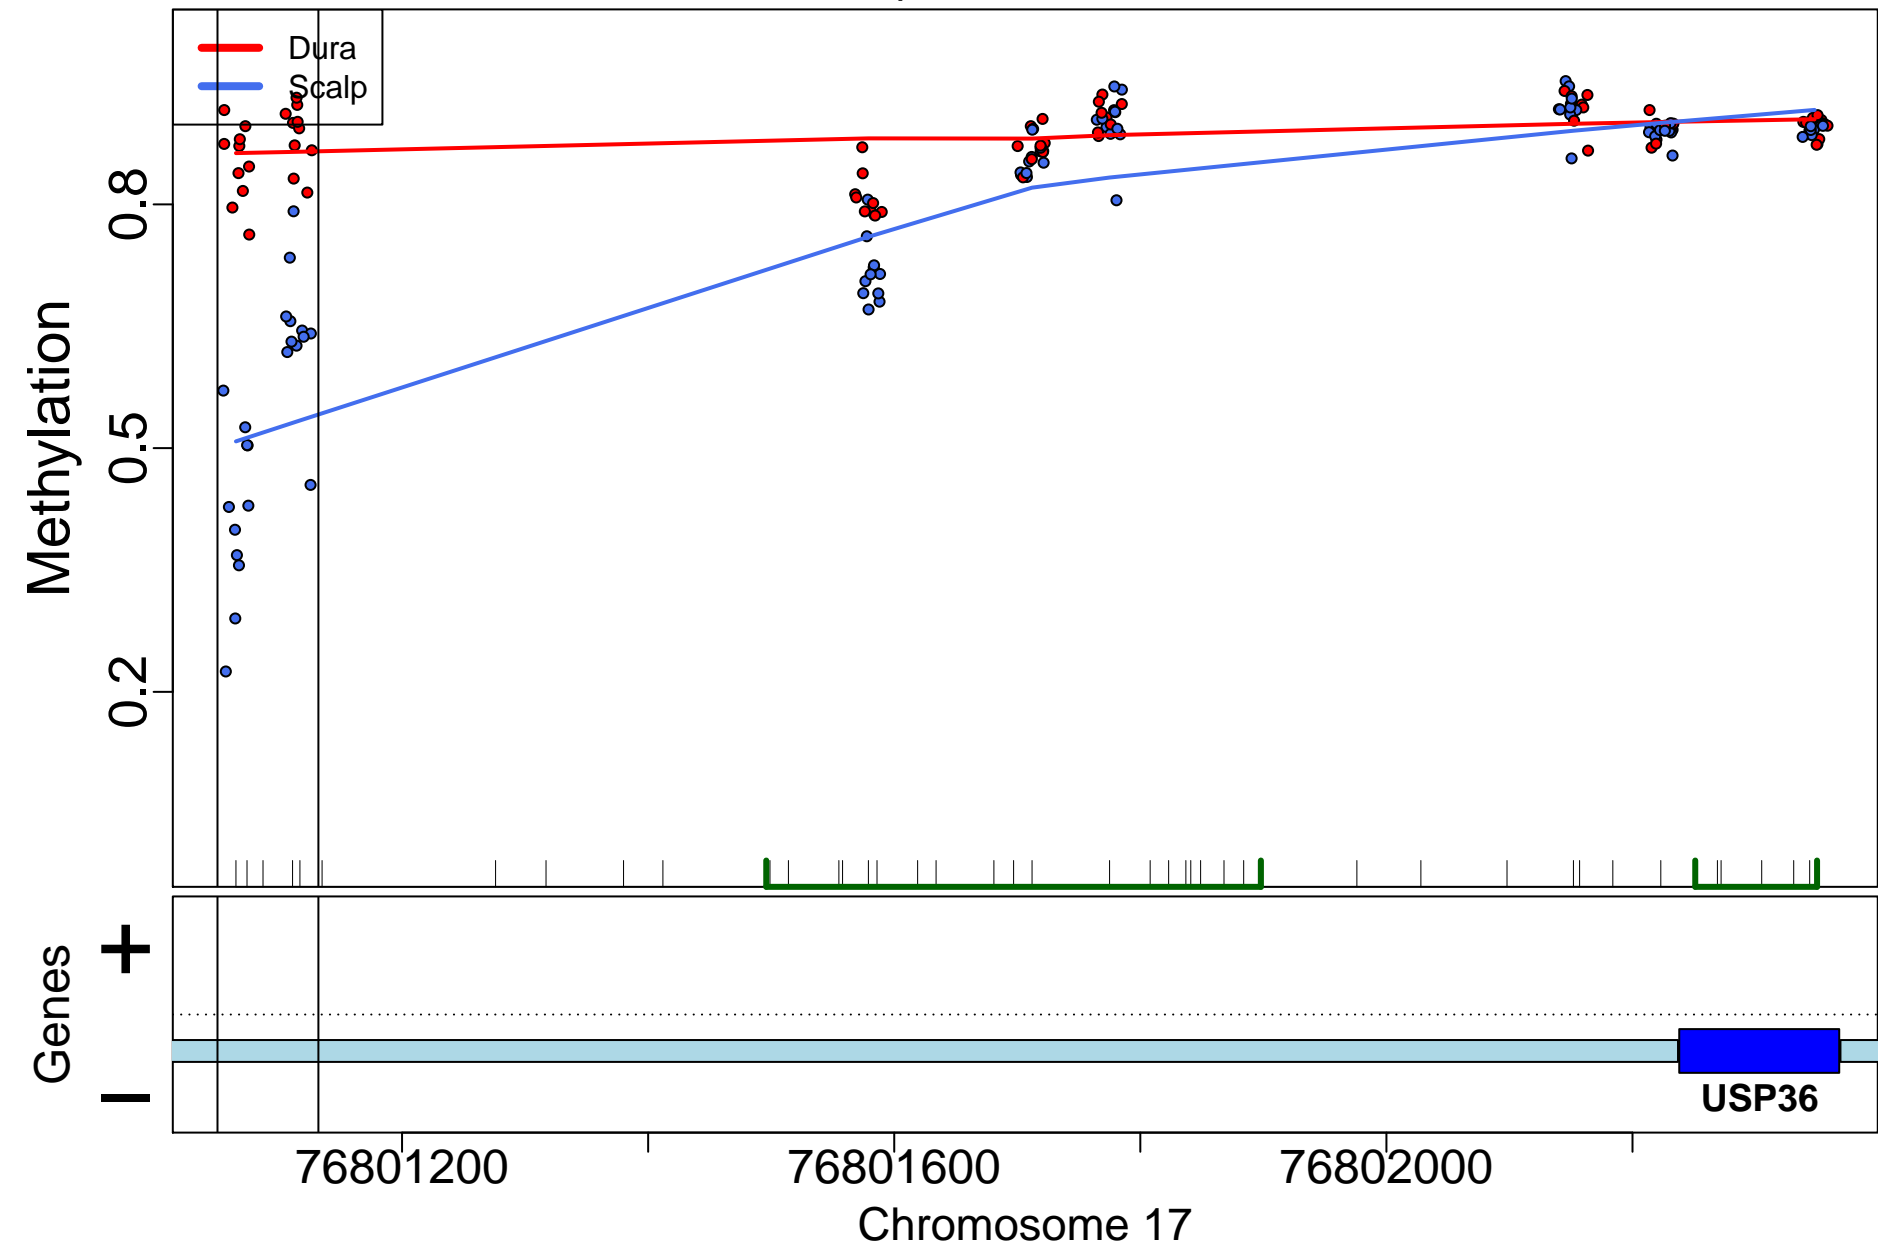

SOX2-OT; 0bp from tss:NA

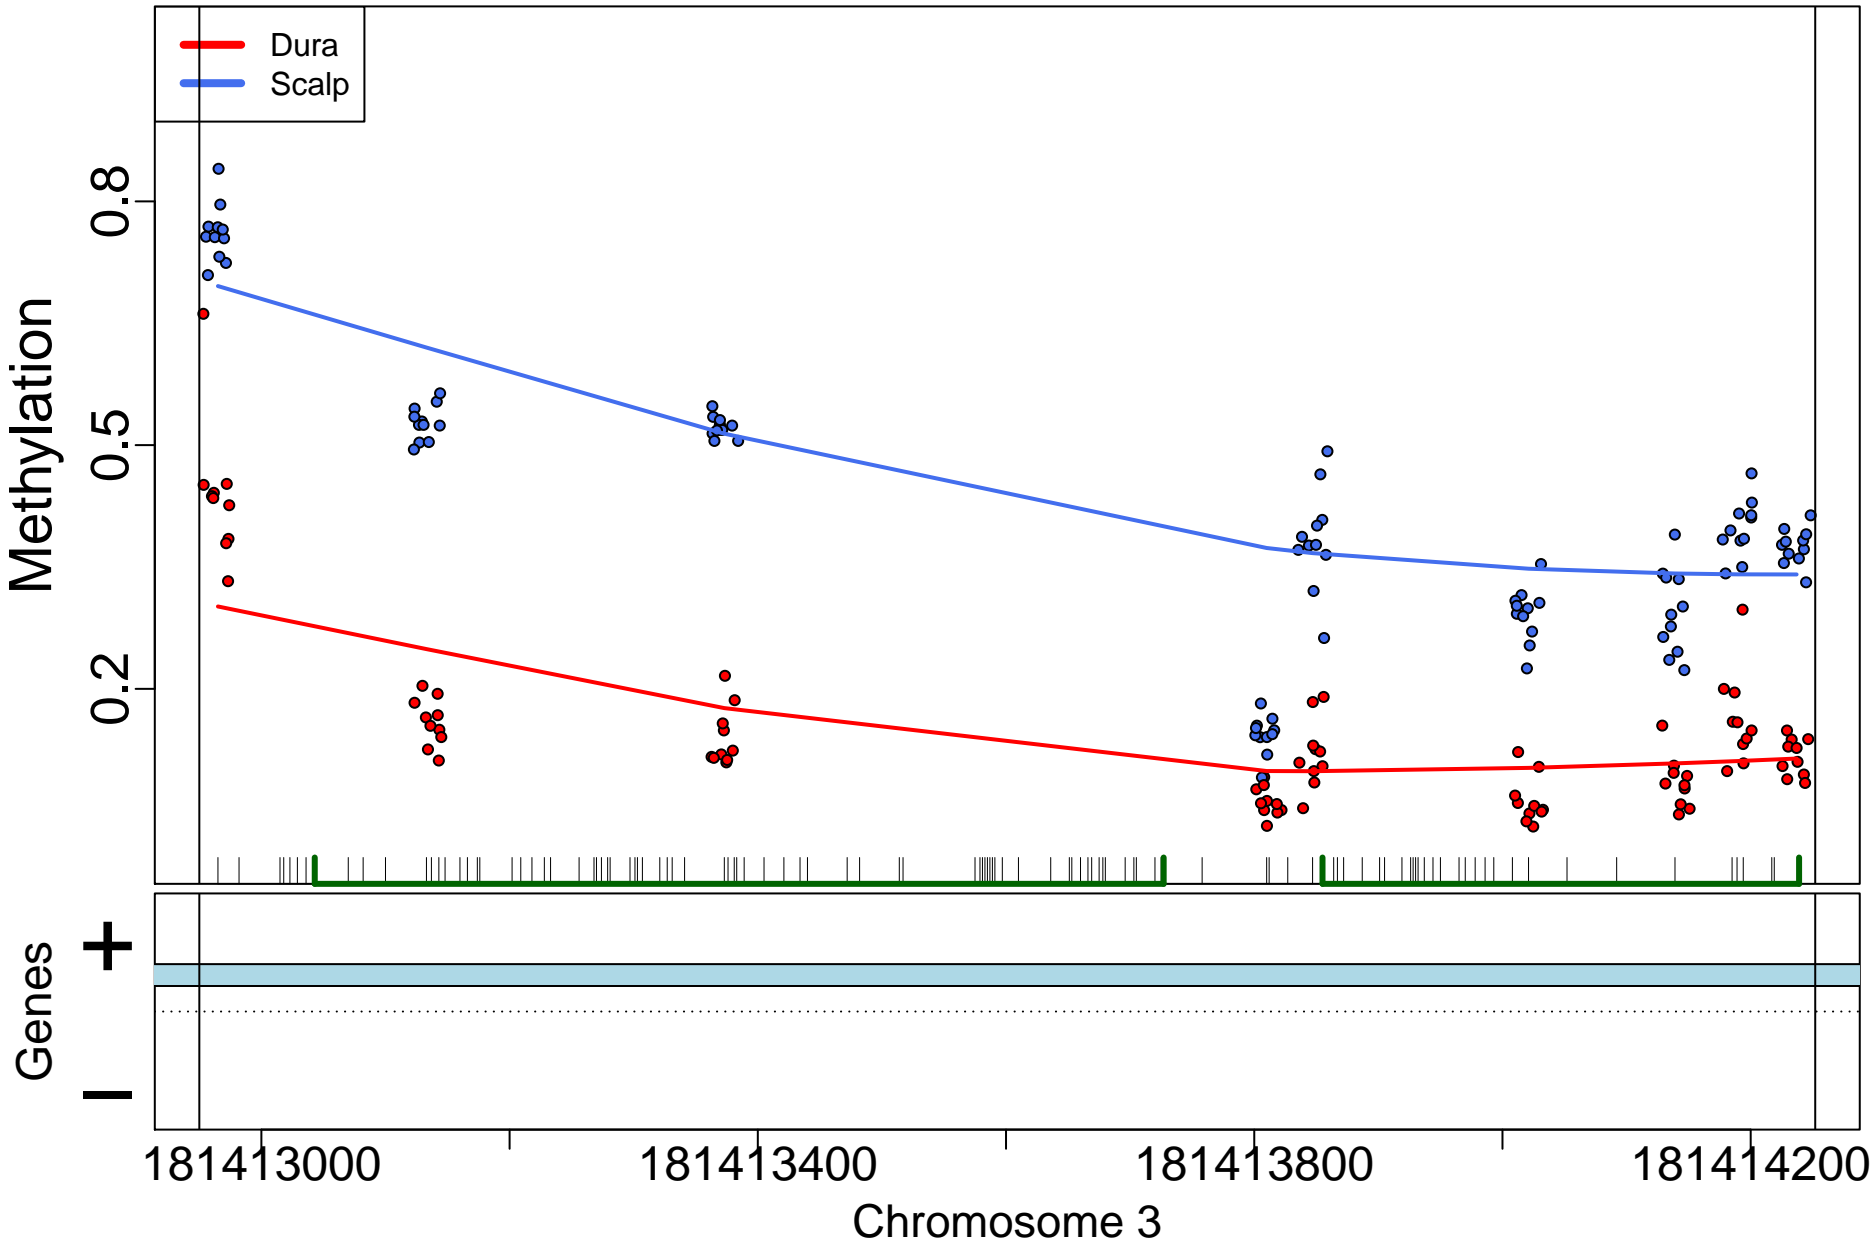

SOX2-OT; 0bp from tss:NA

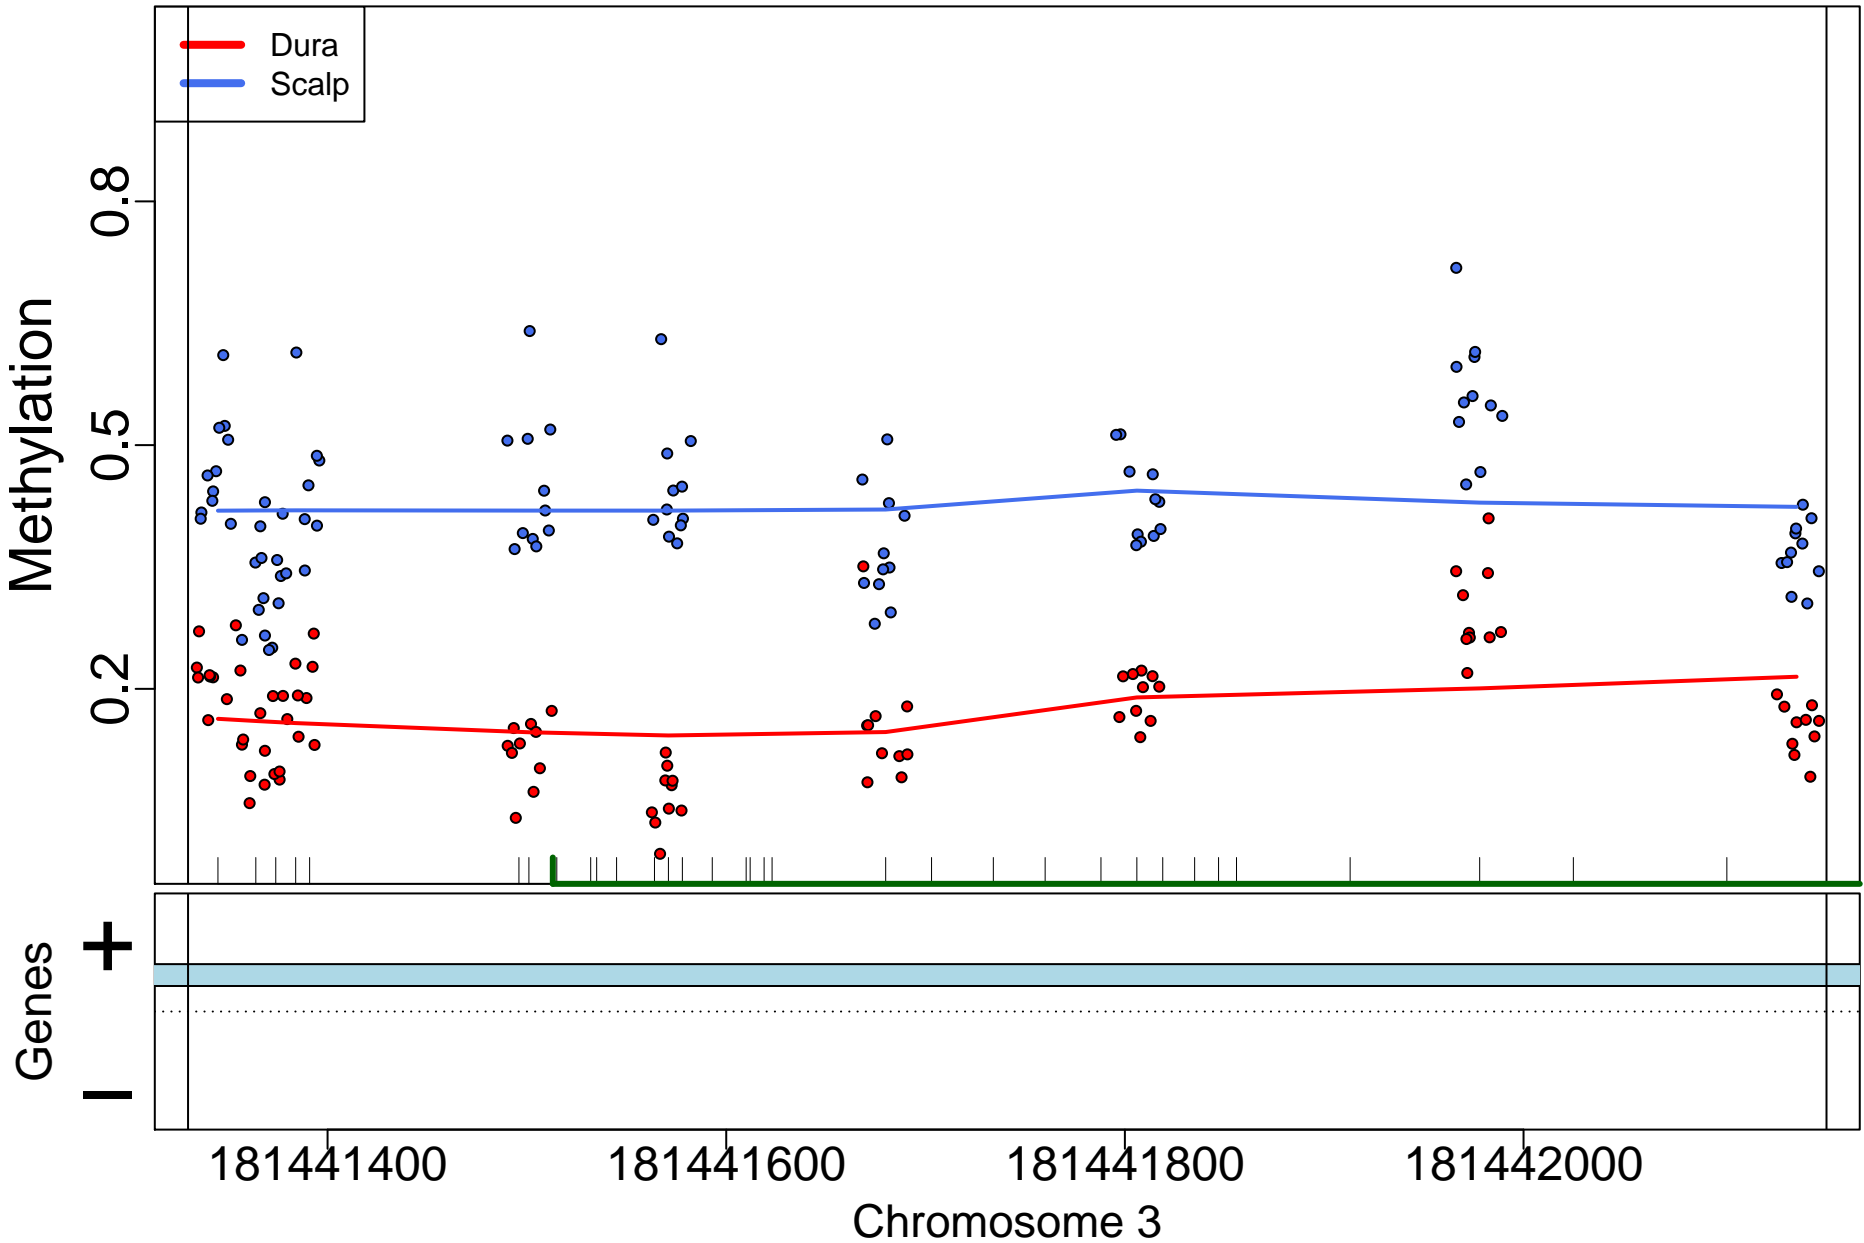

FOXI2; 925bp from tss:promoter

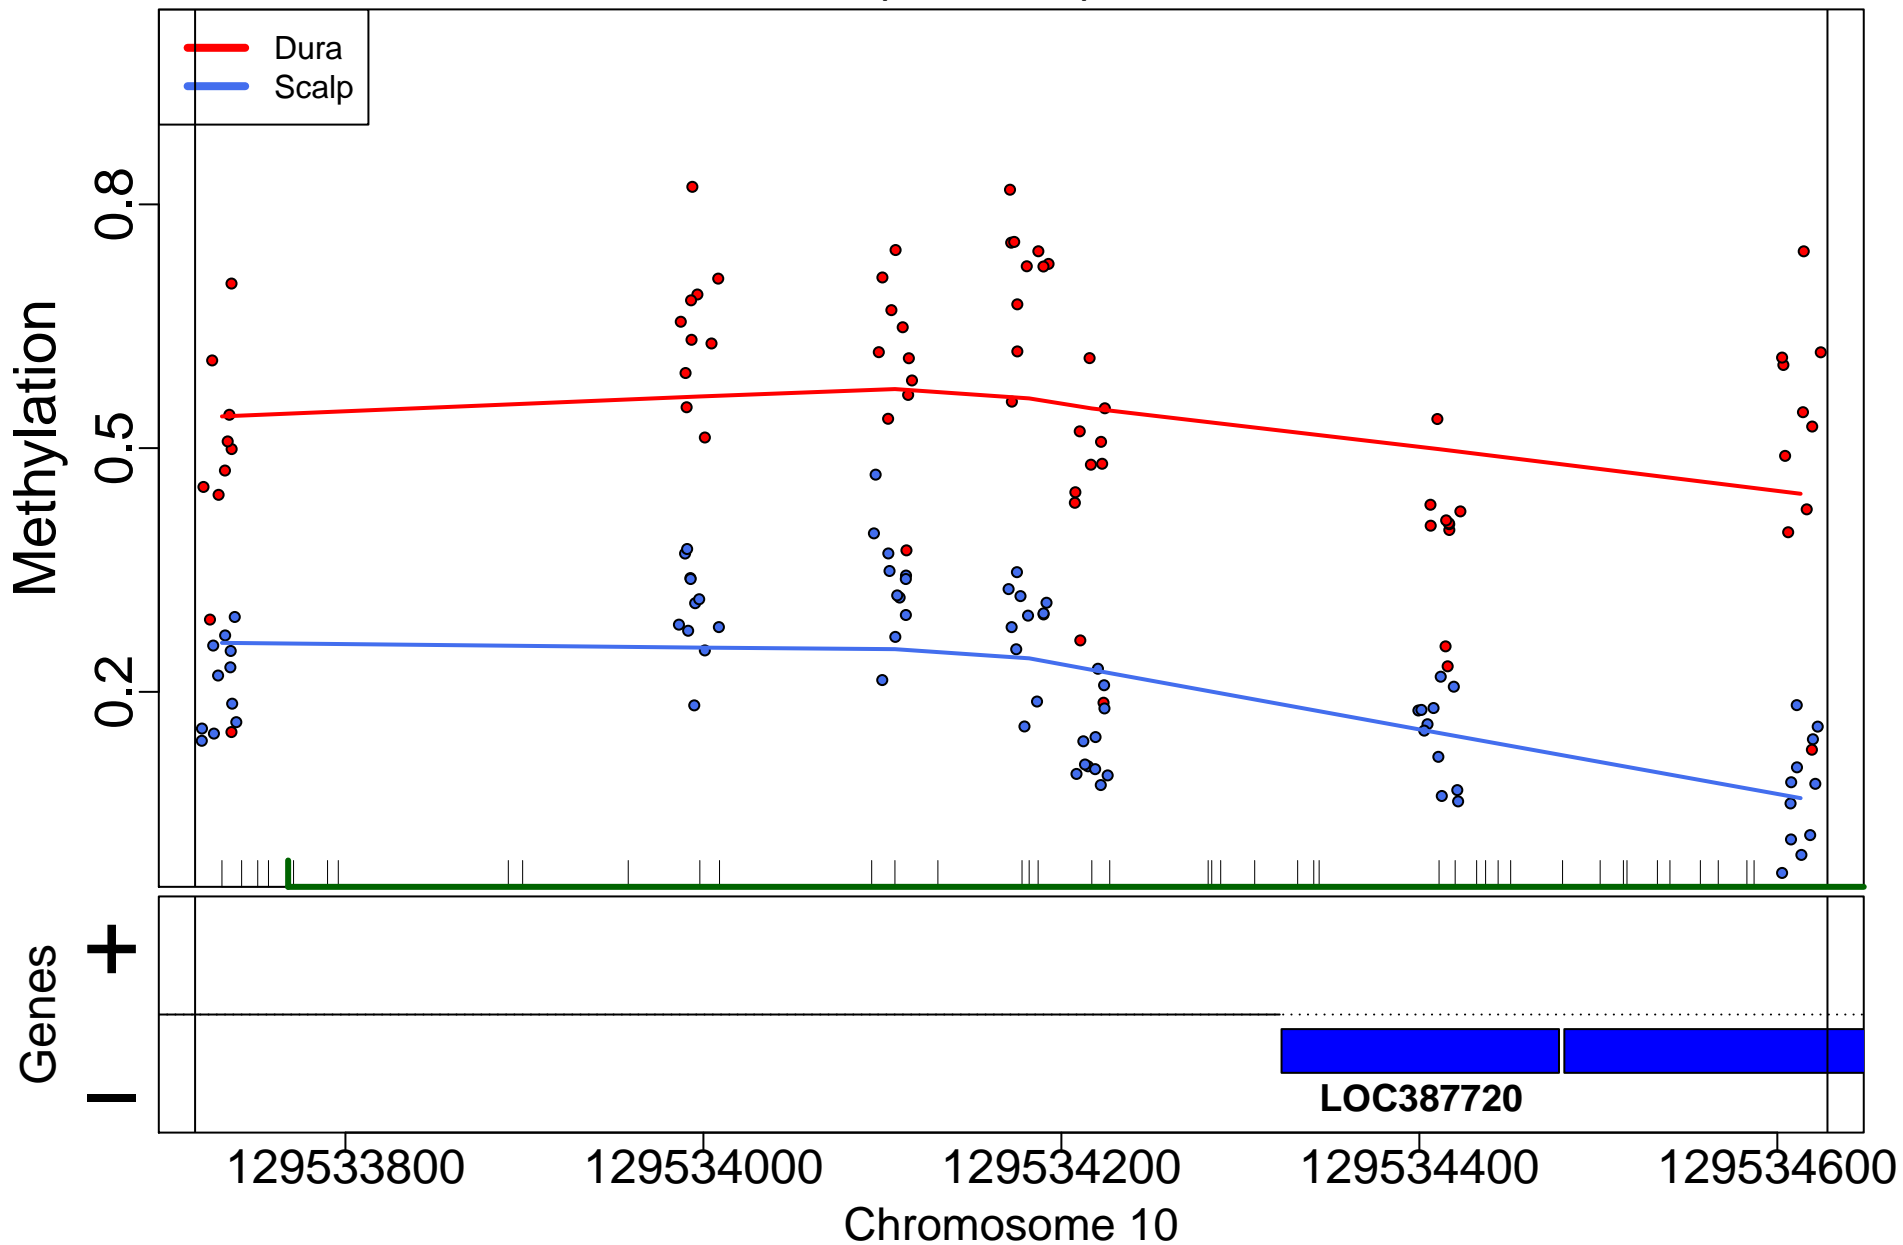



BAIAP2; 1511bp from tss:inside intron

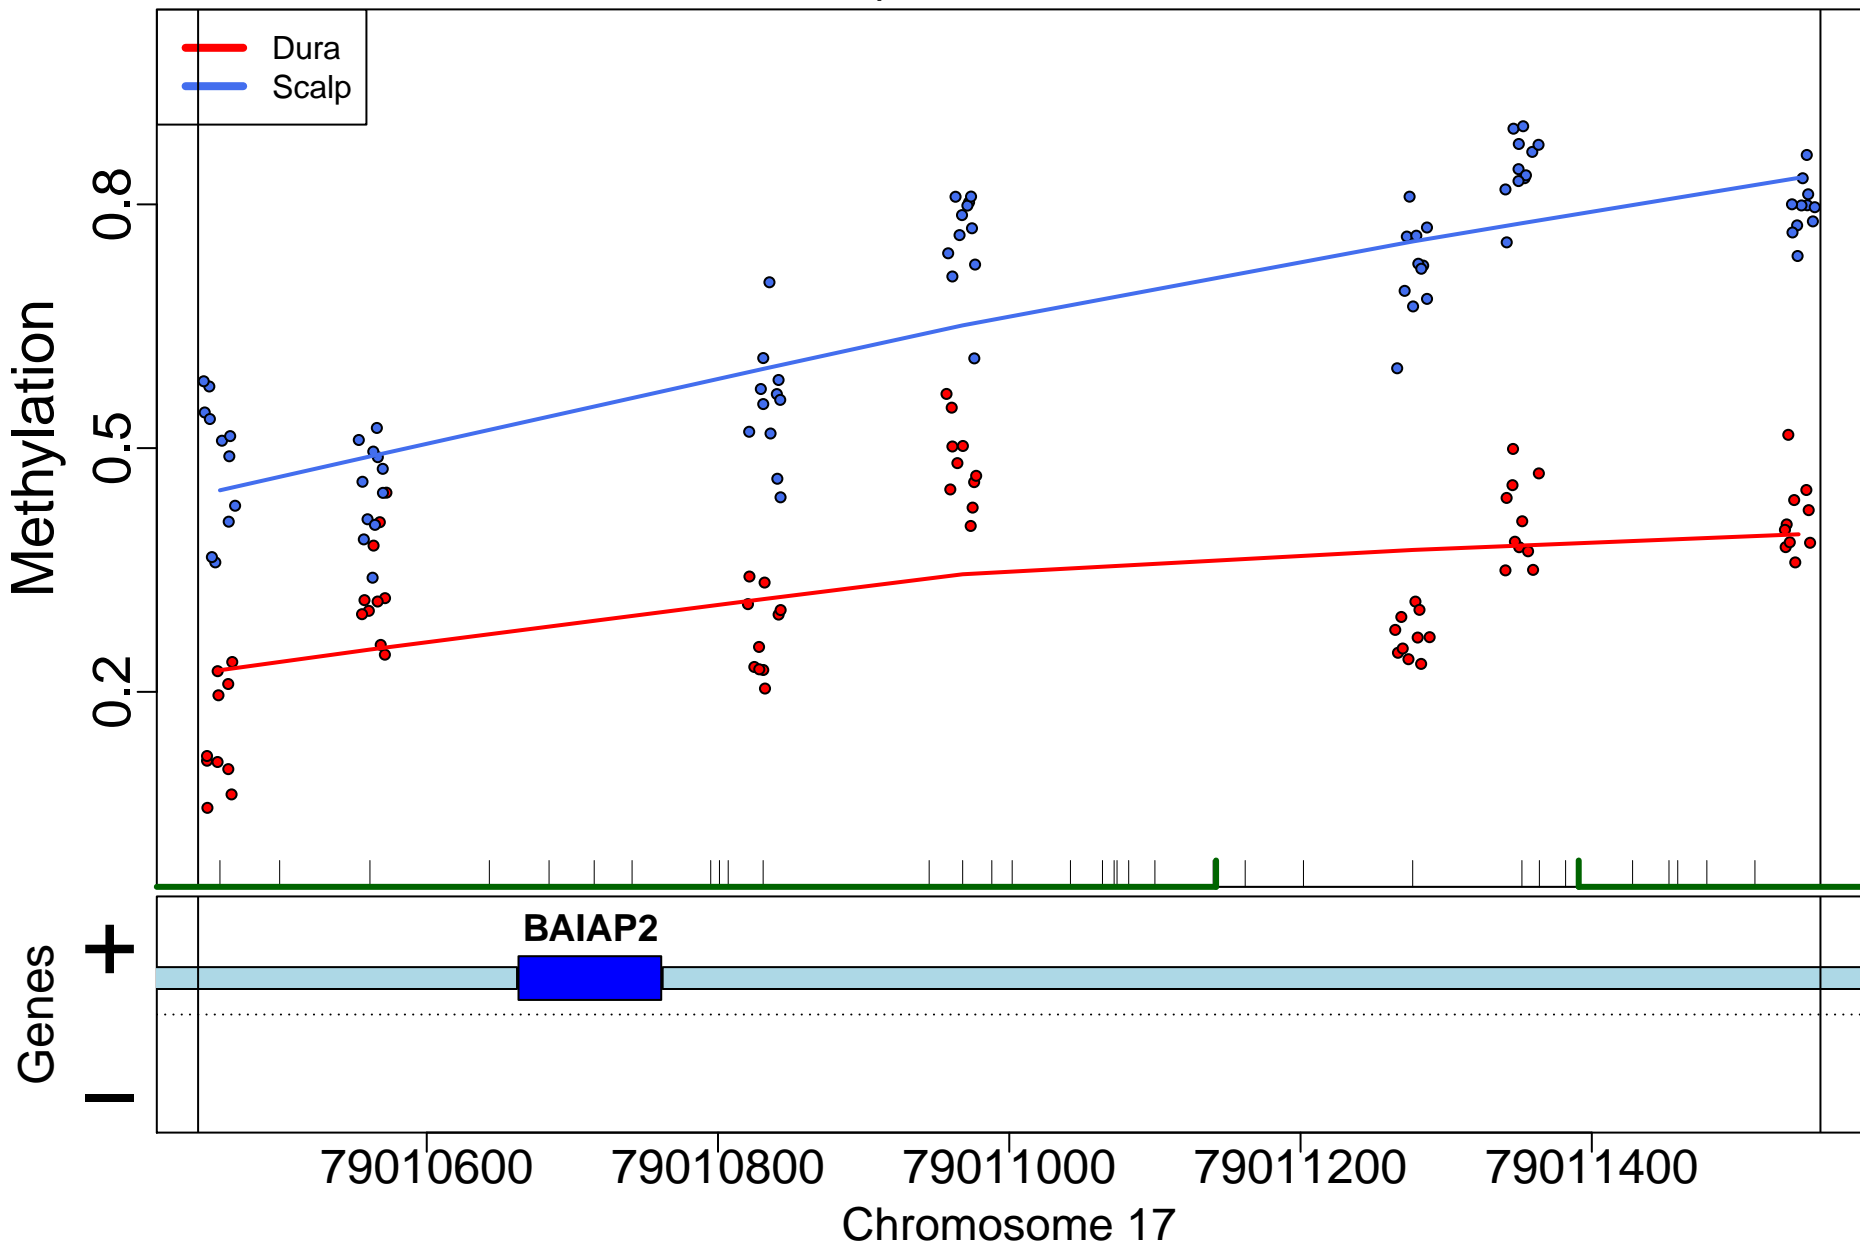

ALX3; 2327bp from tss:inside intron

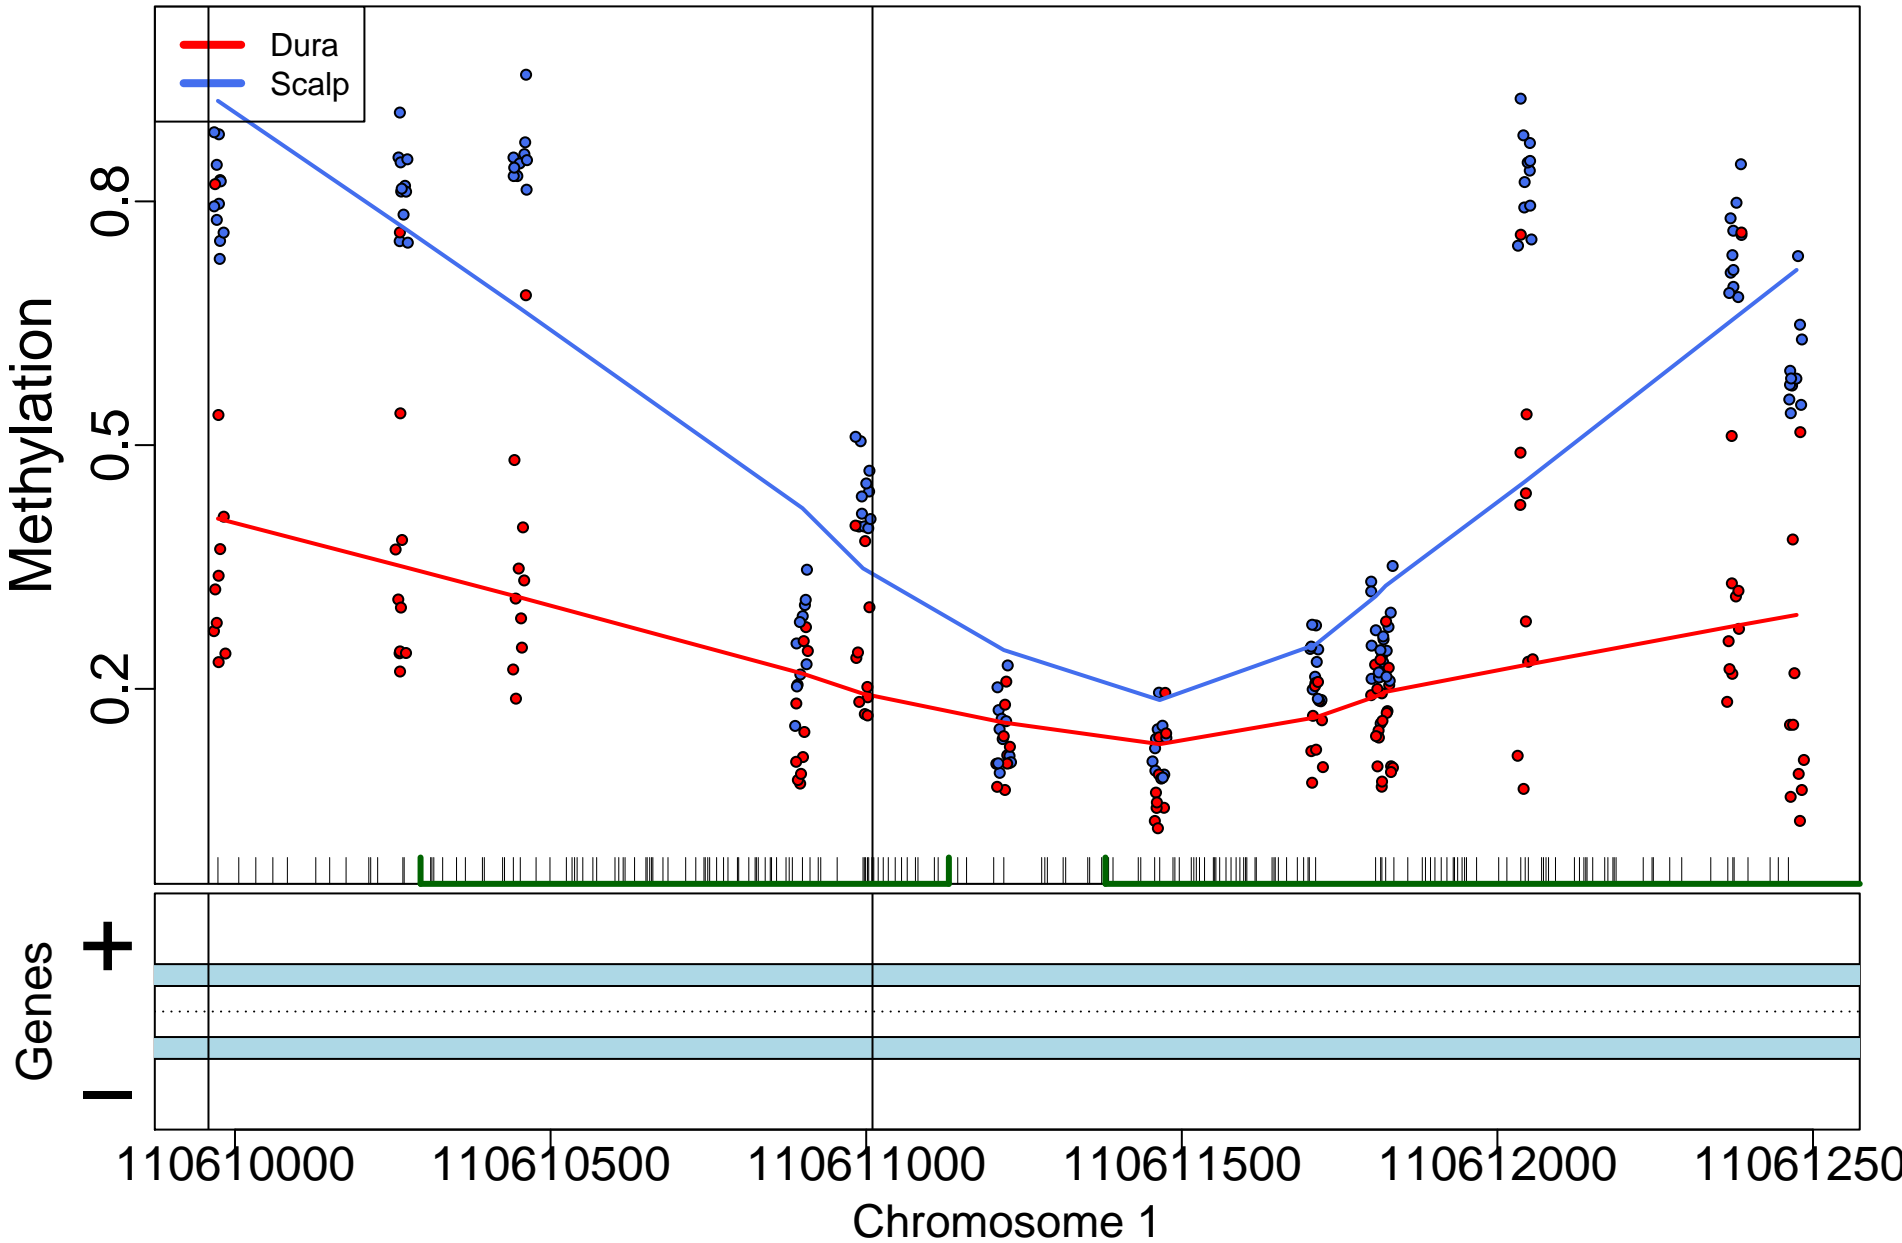

EVX1; 3756bp from tss:overlaps 3'

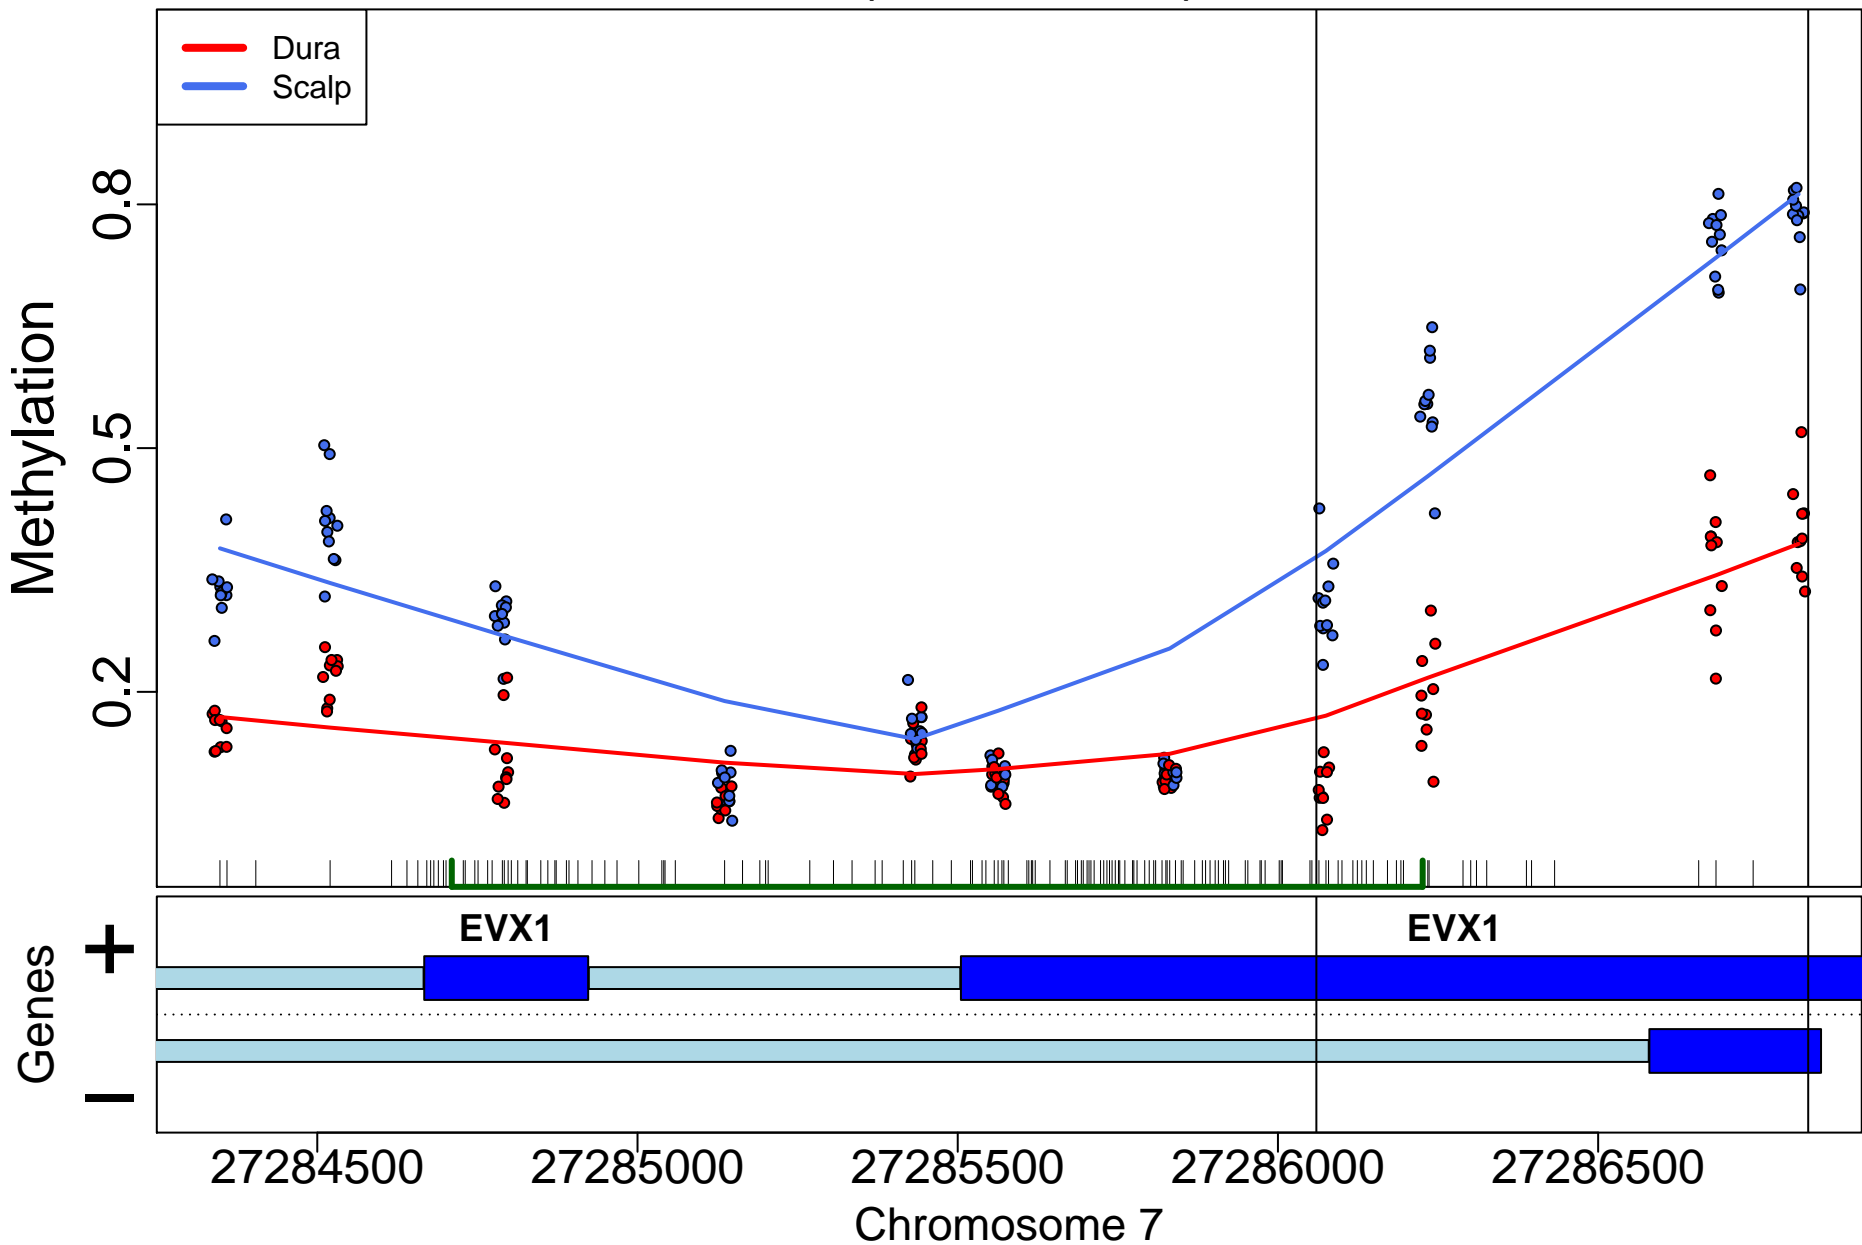

LINC01019; 0bp from tss:NA

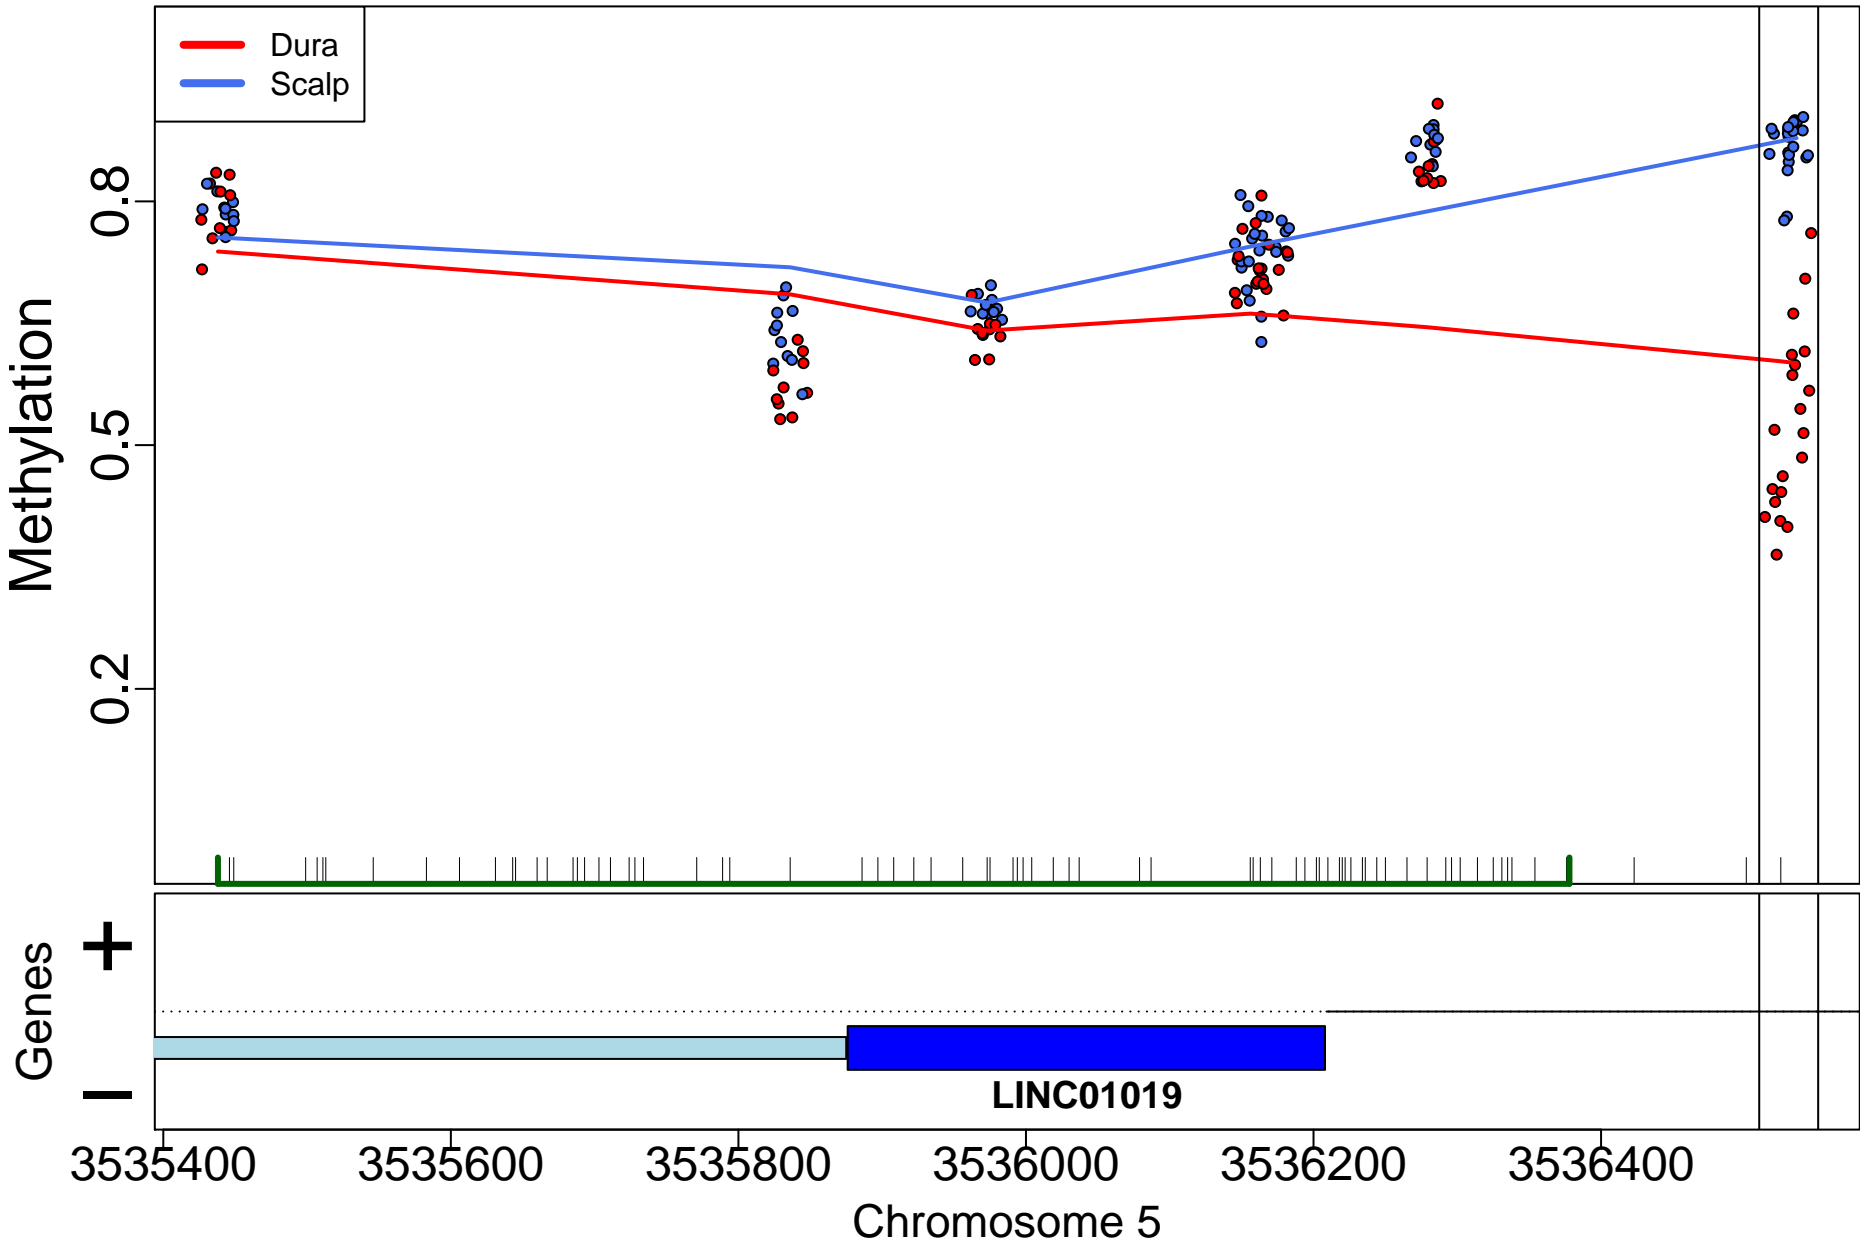

BOLA2; 0bp from tss:NA

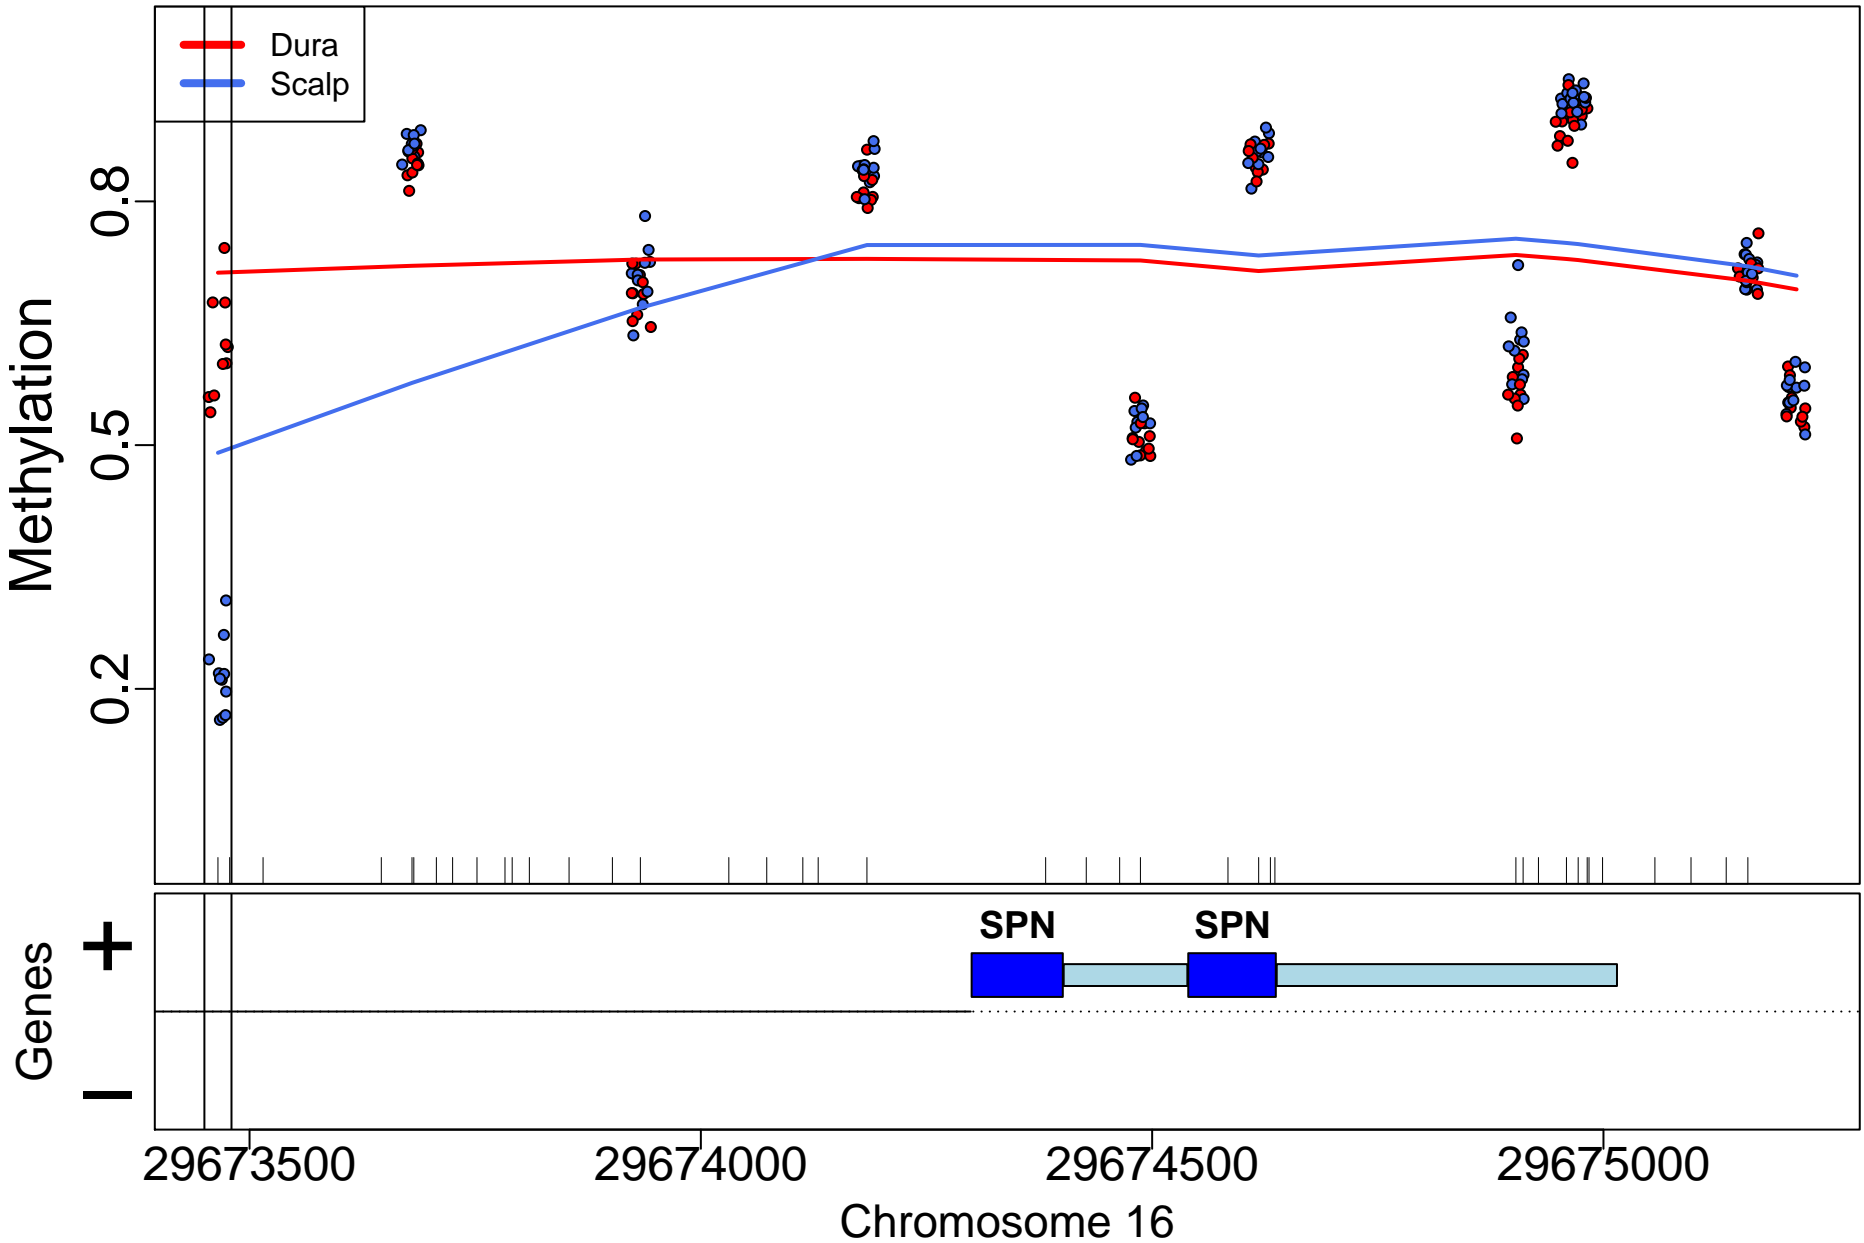

# ONECUT1; 1769bp from tss:promoter

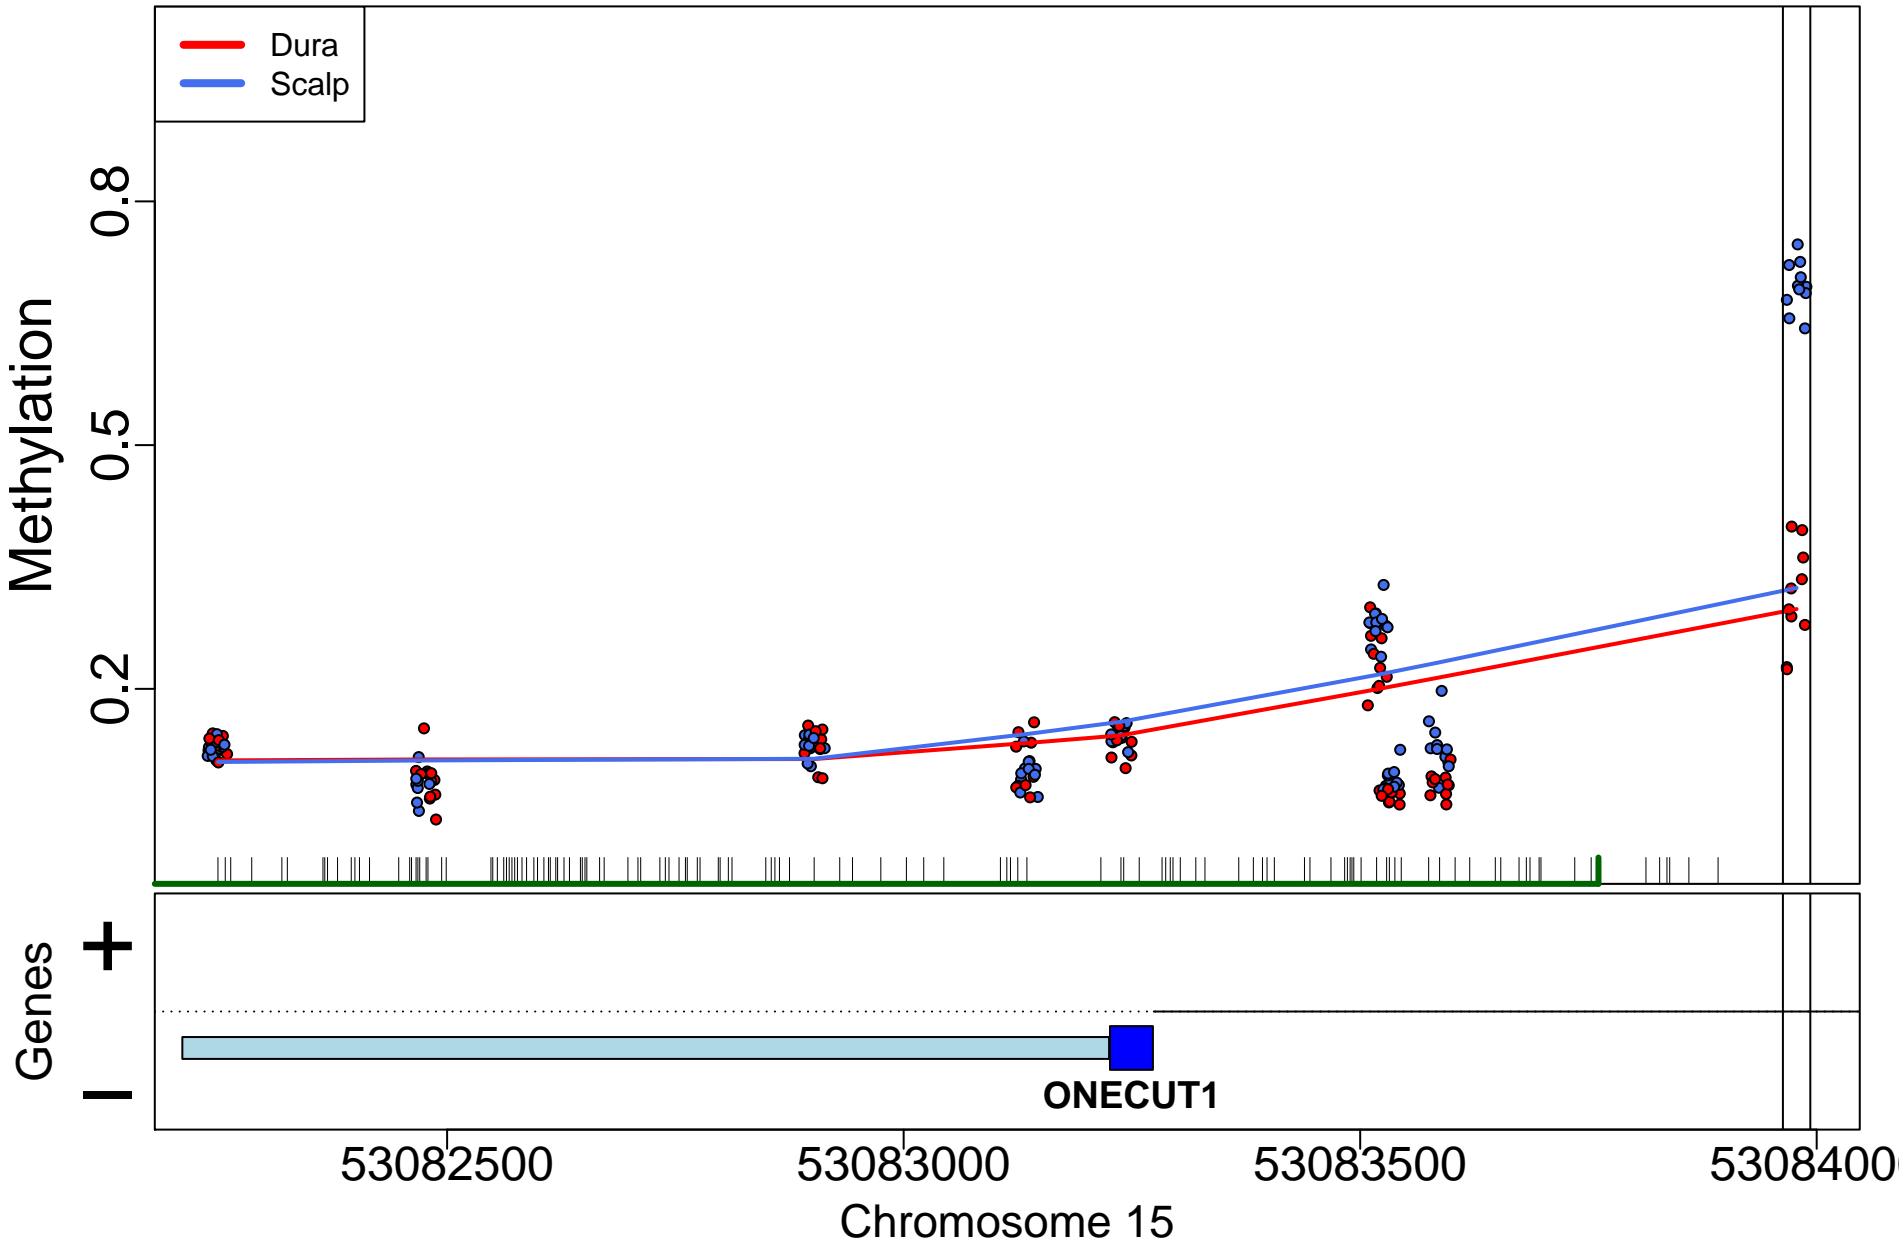

# ZNF192P1; 0bp from tss:NA

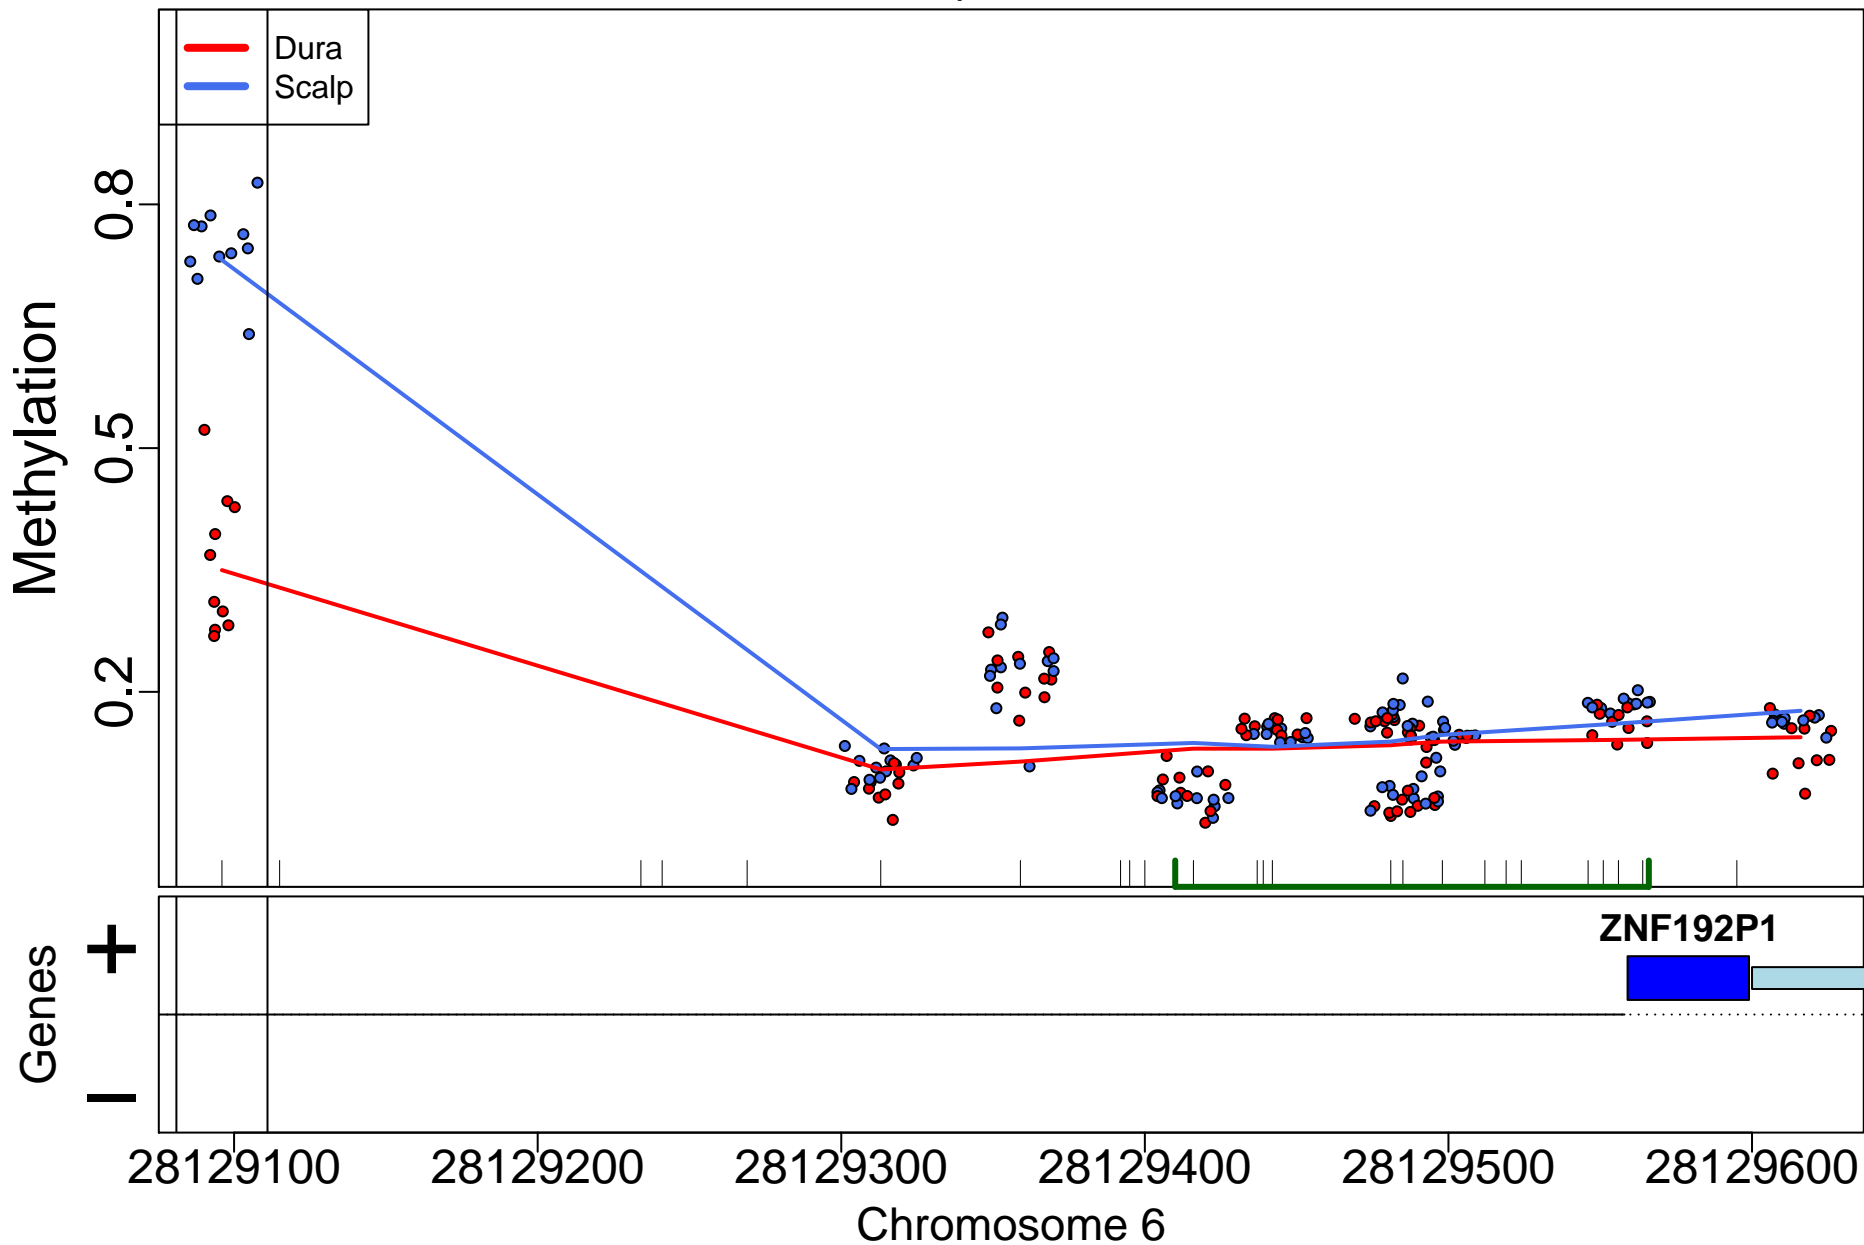

# TSPAN13; 727bp from tss:inside intron

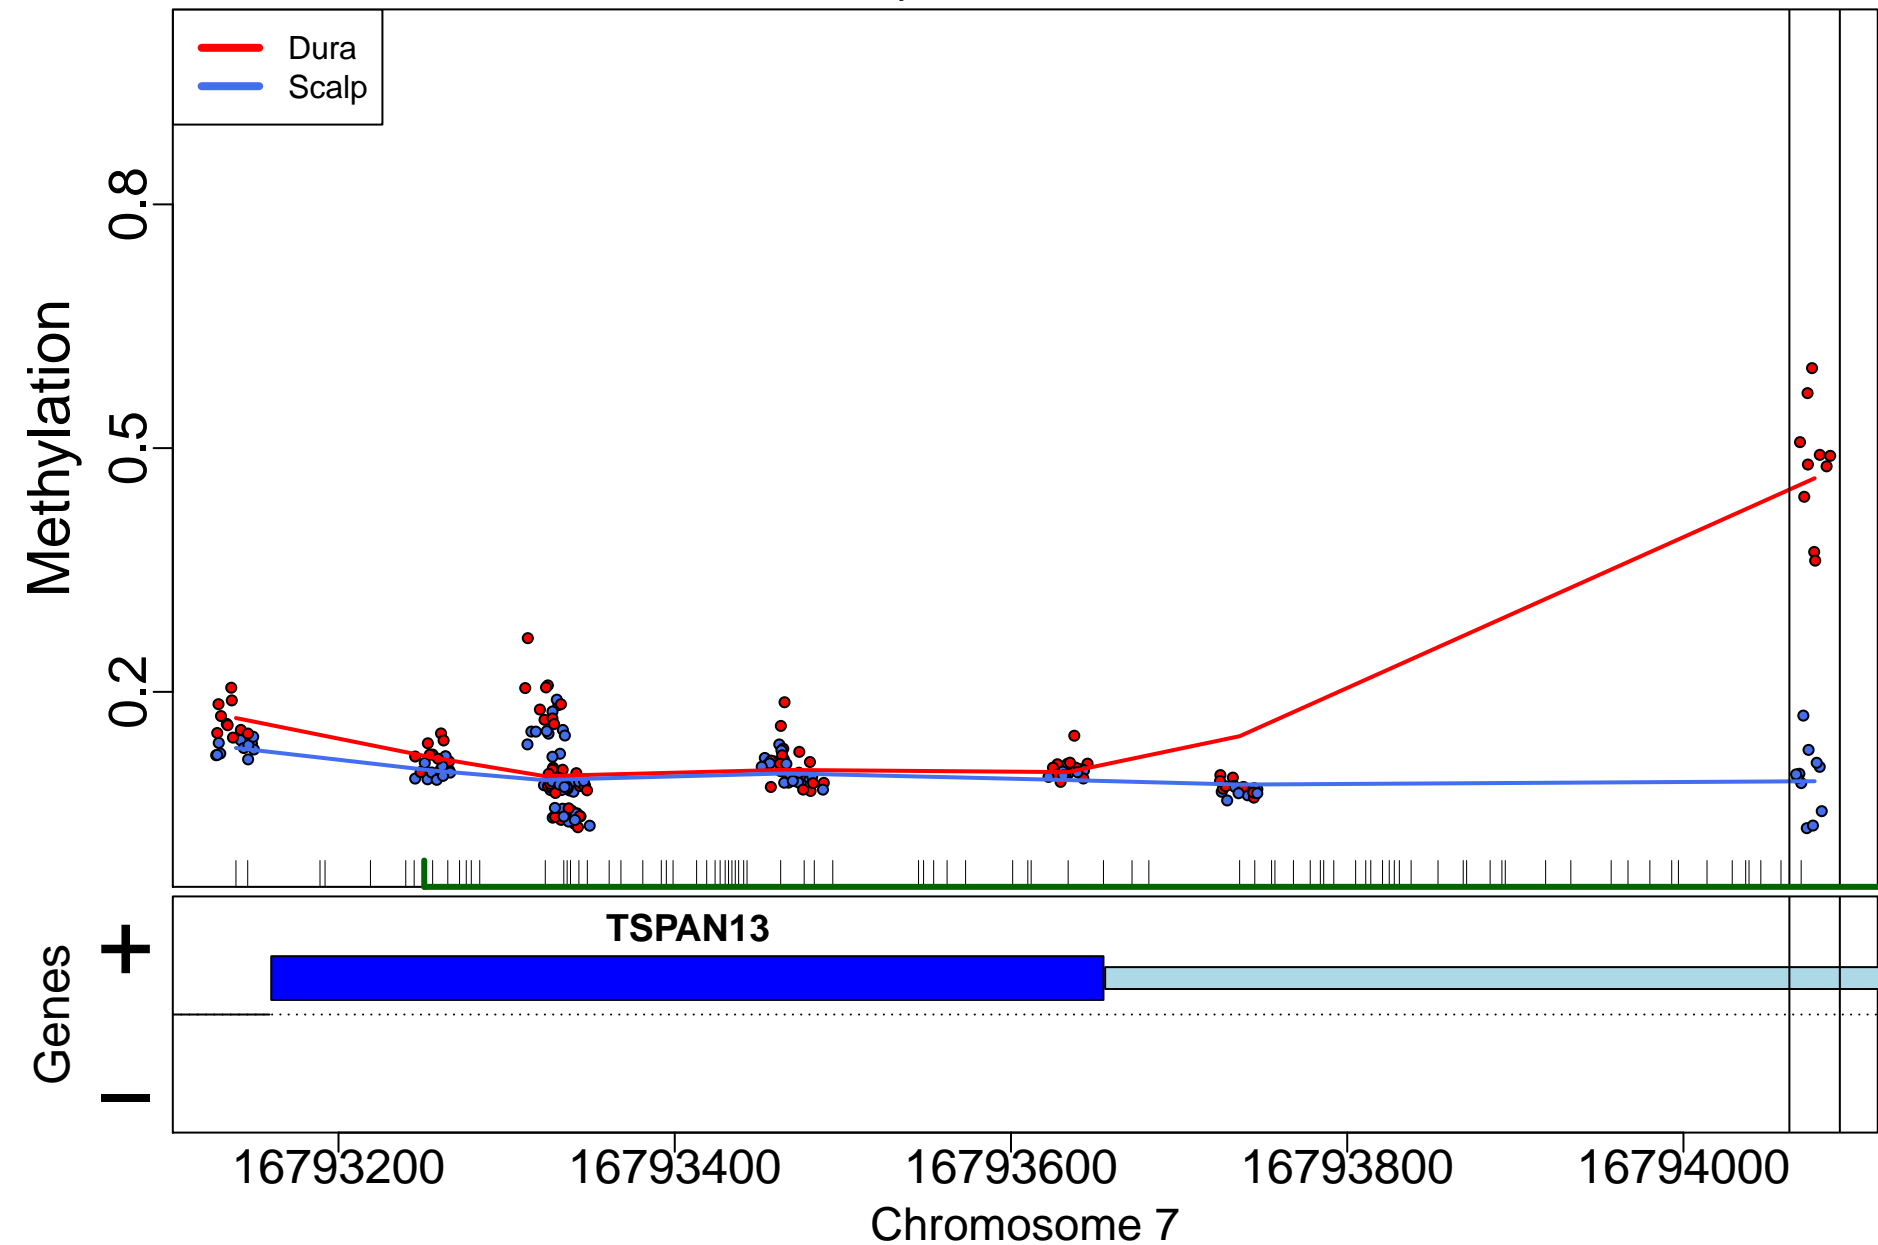



CHI3L2; 437bp from tss:inside intron

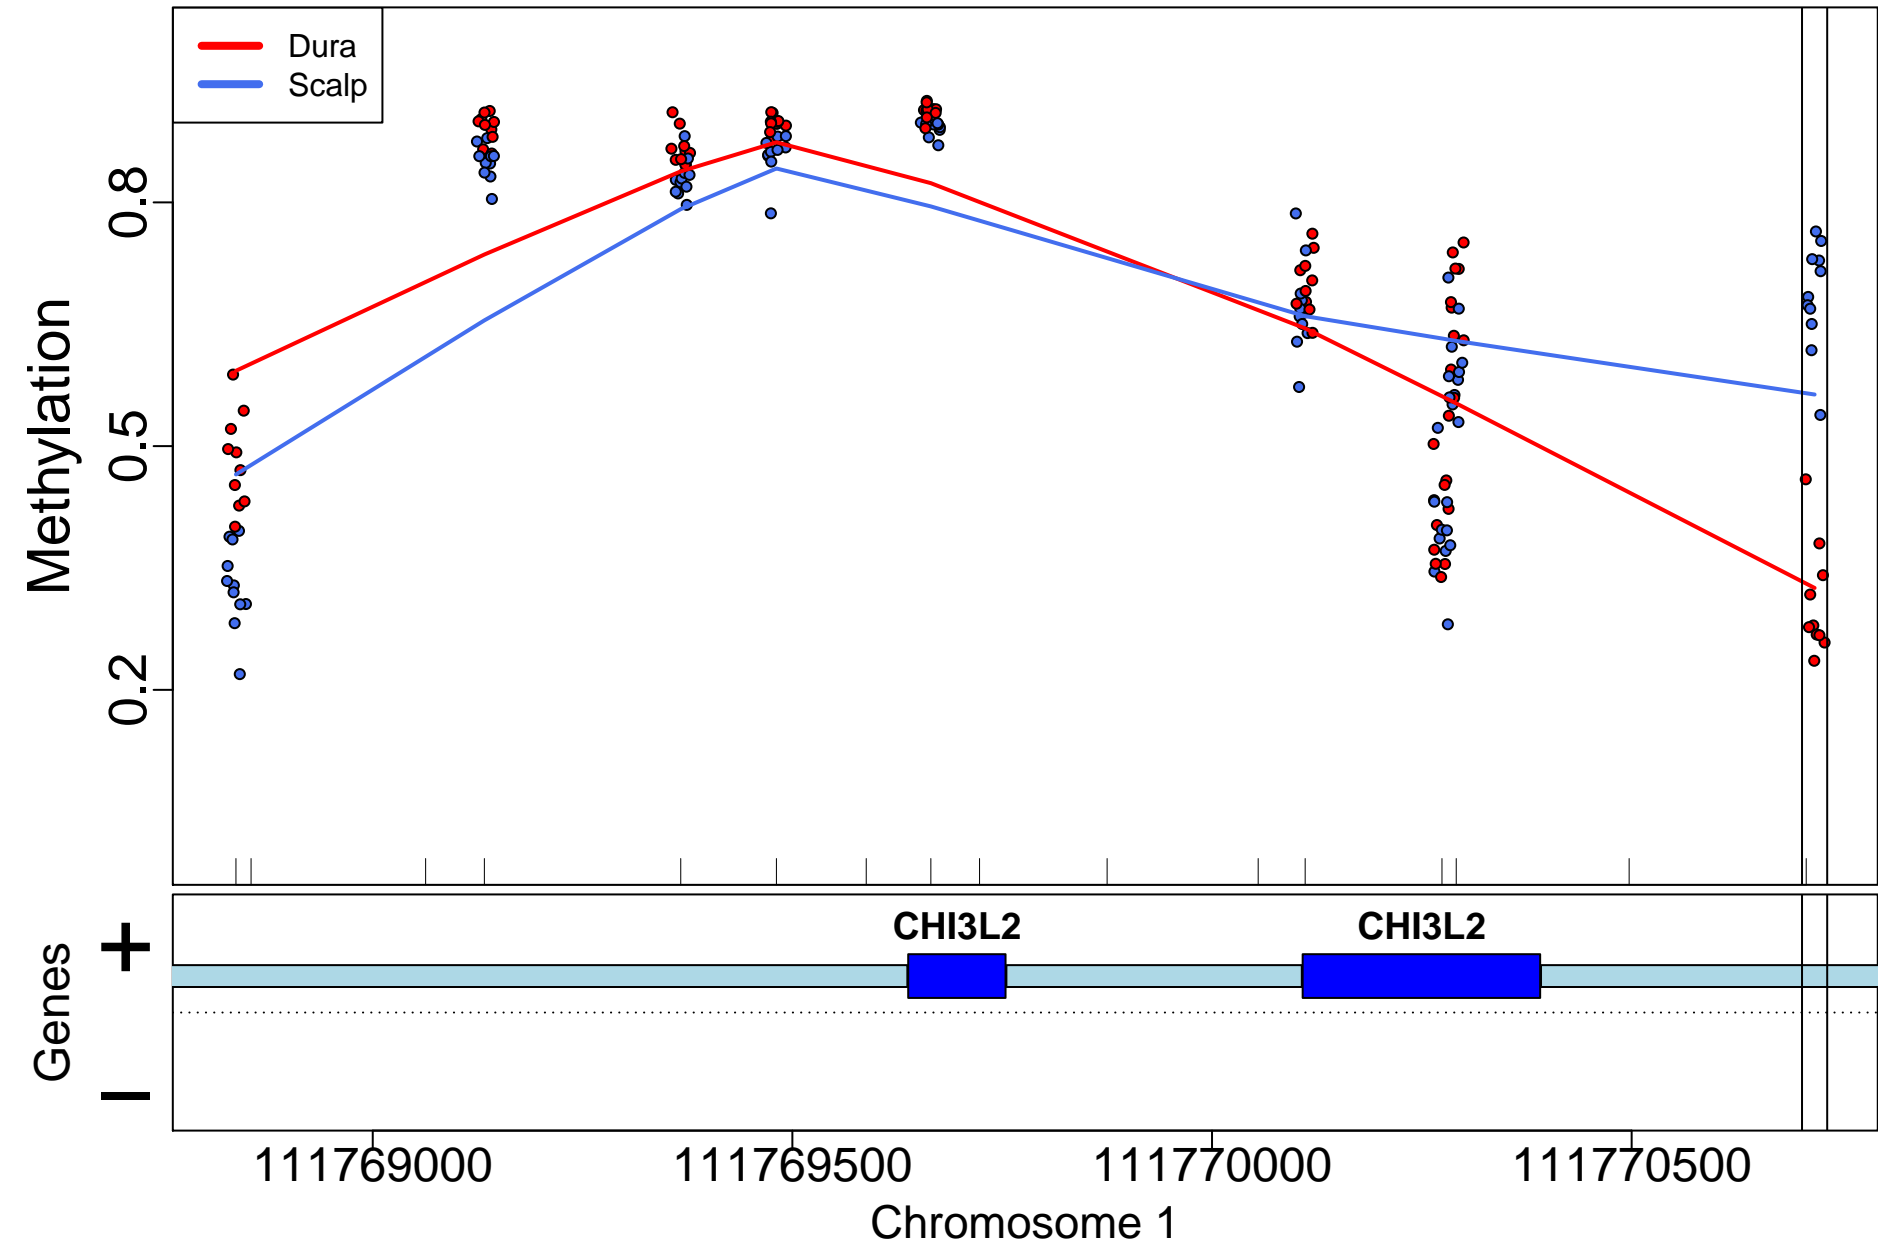

STMN1; 2462bp from tss:inside intron

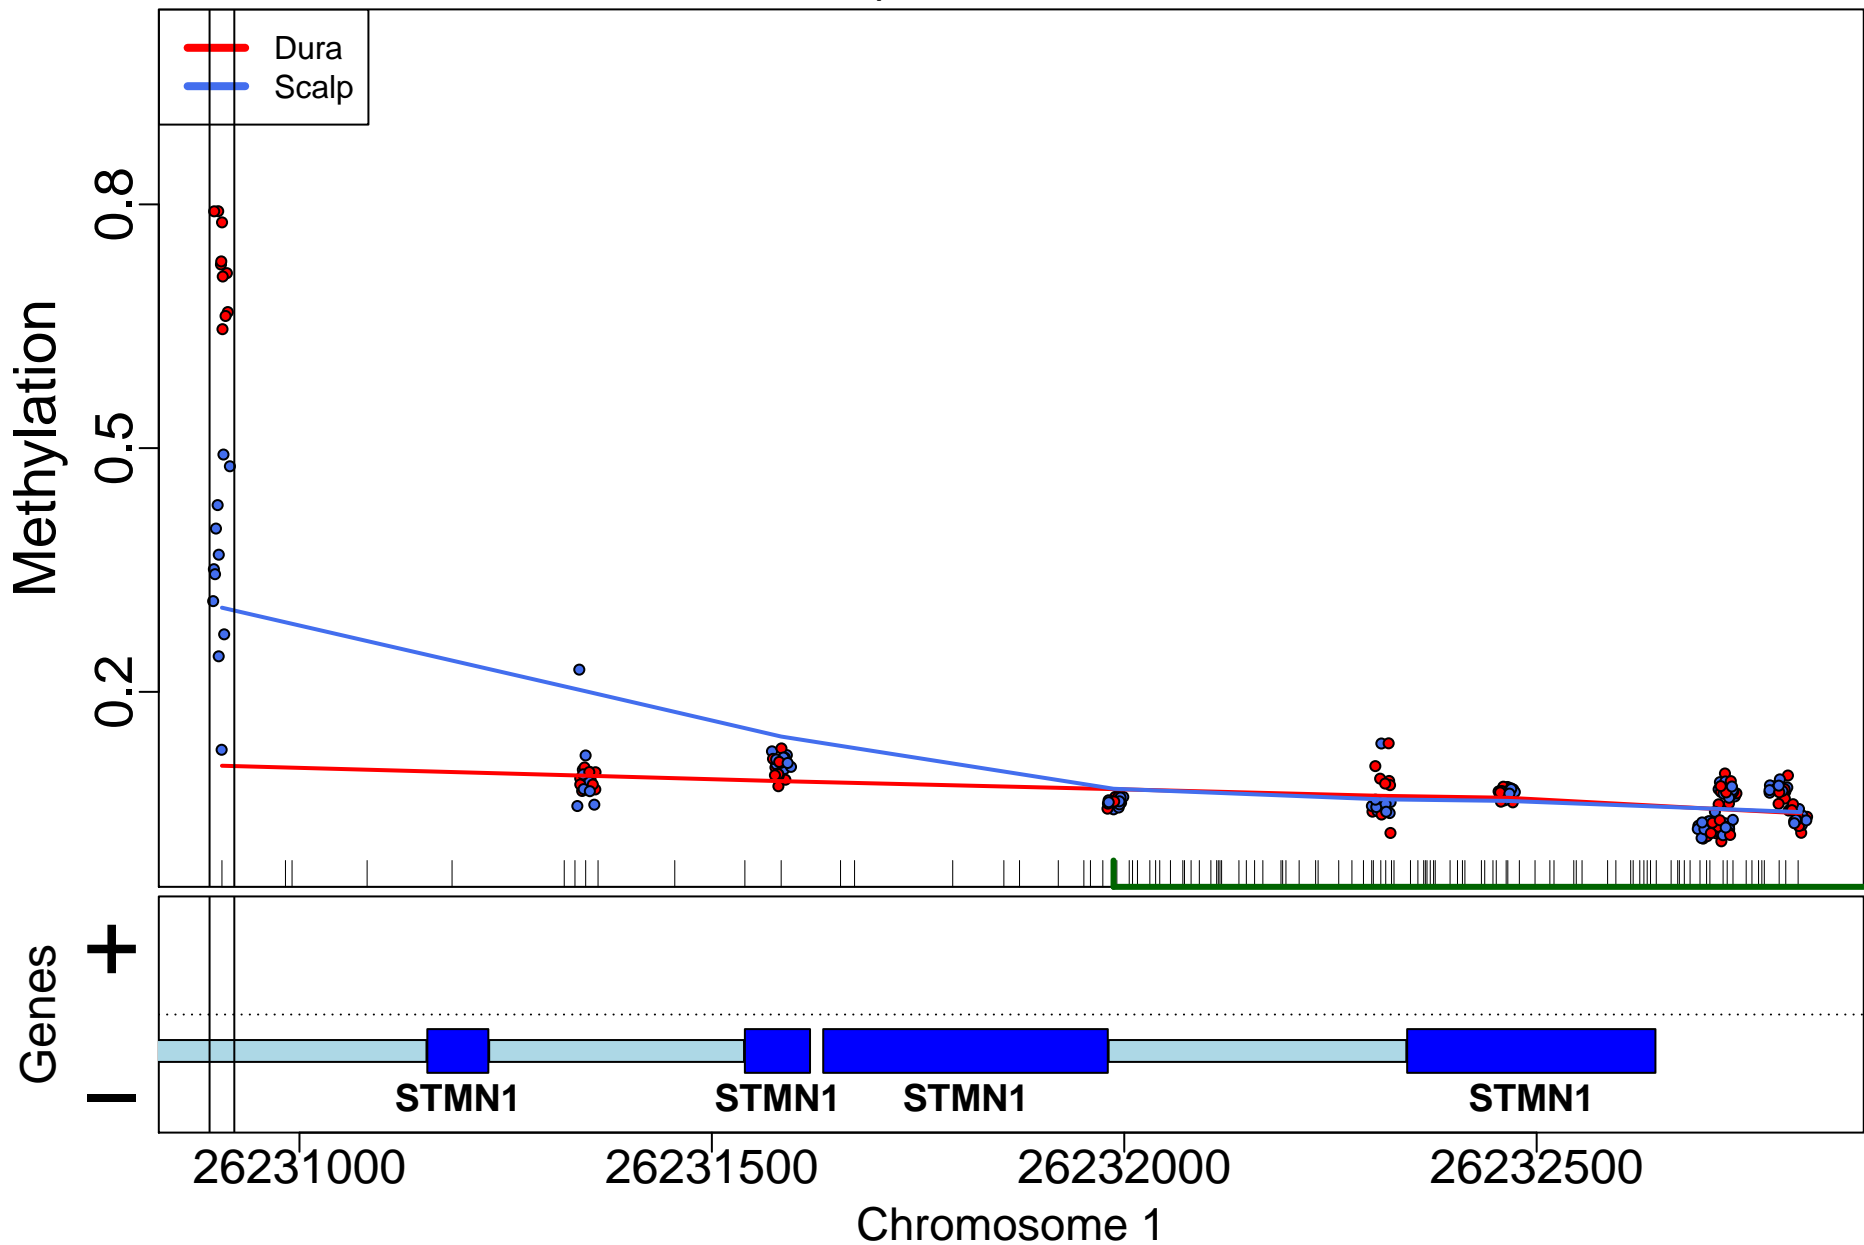

MRI1; 9423bp from tss:inside exon

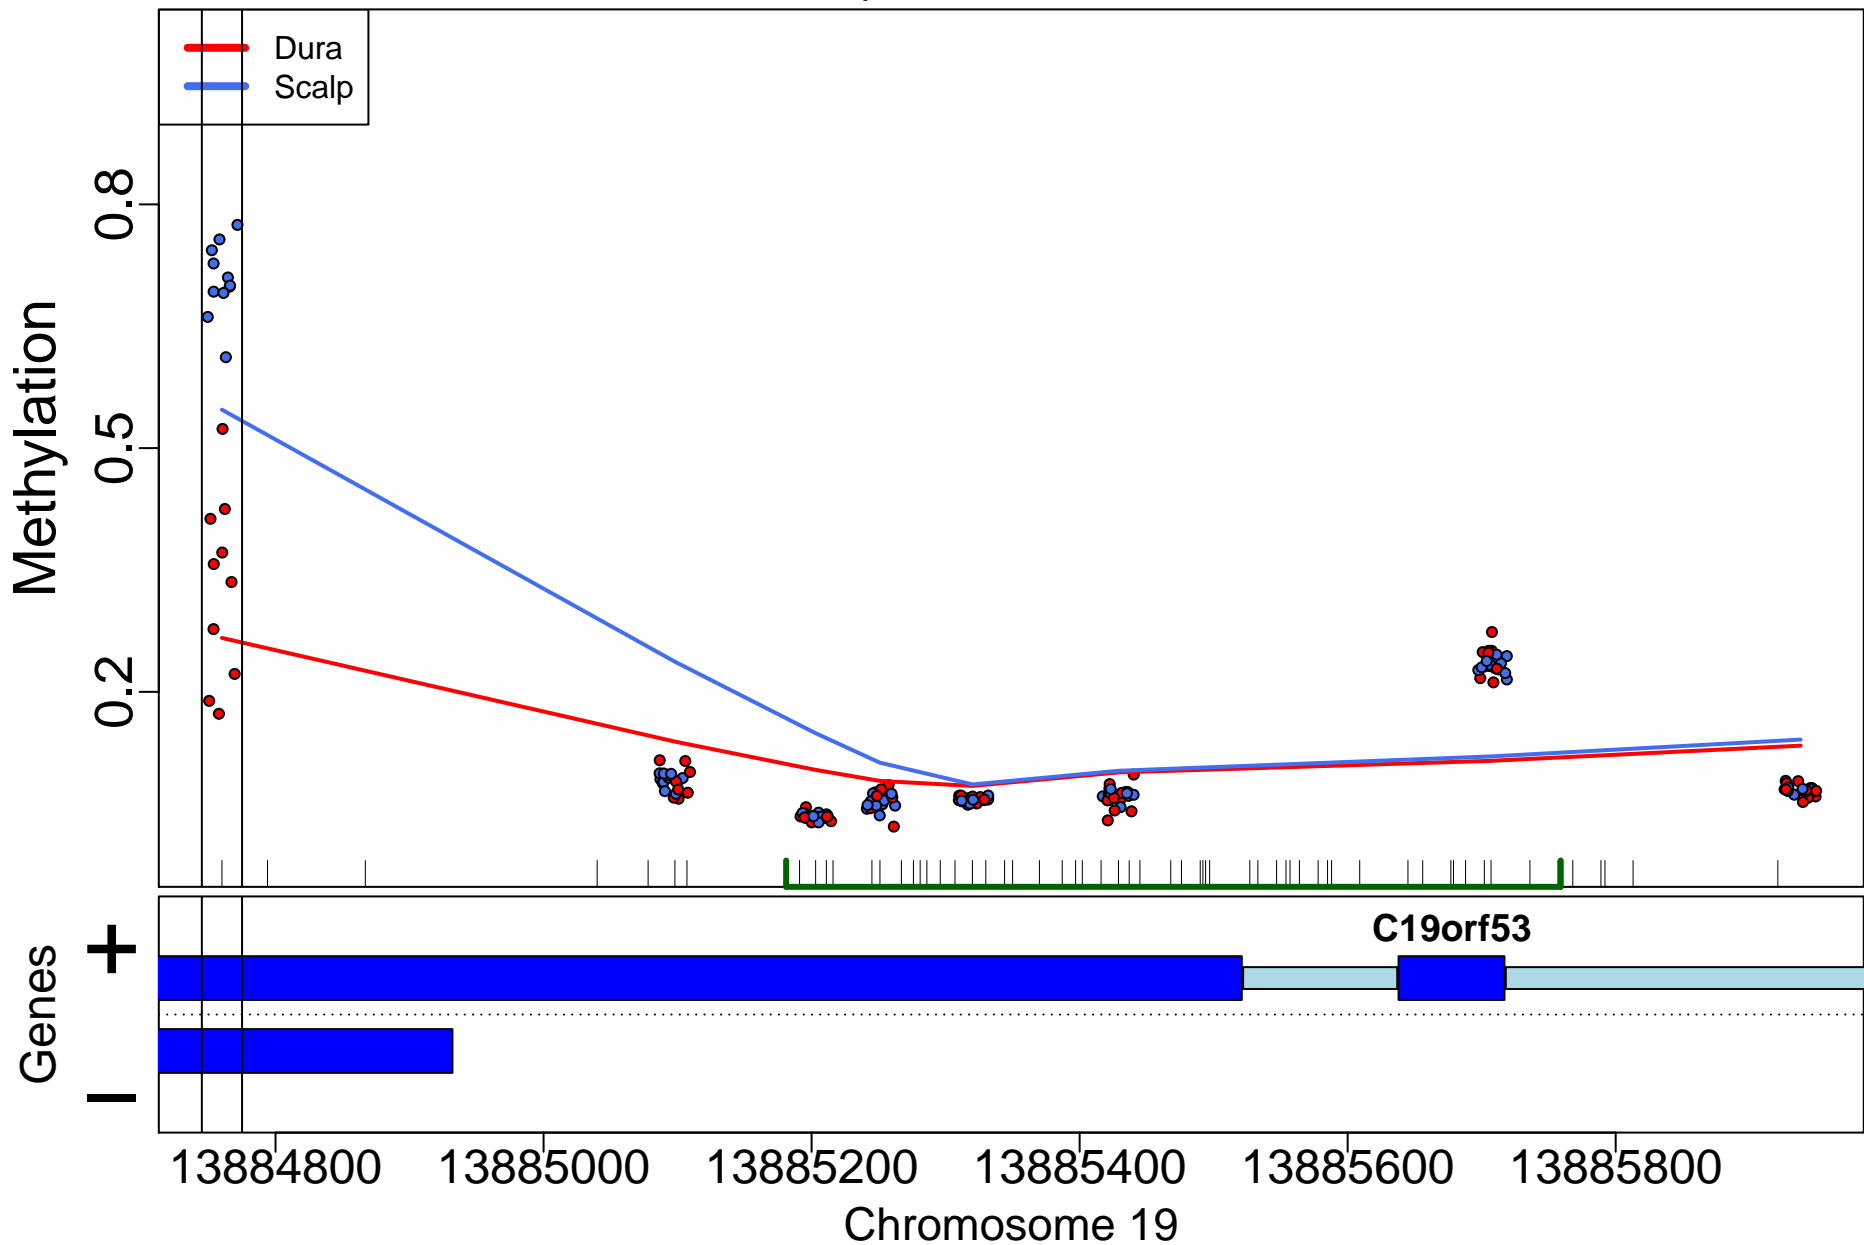

HOXB-AS3; 5399bp from tss:inside intron

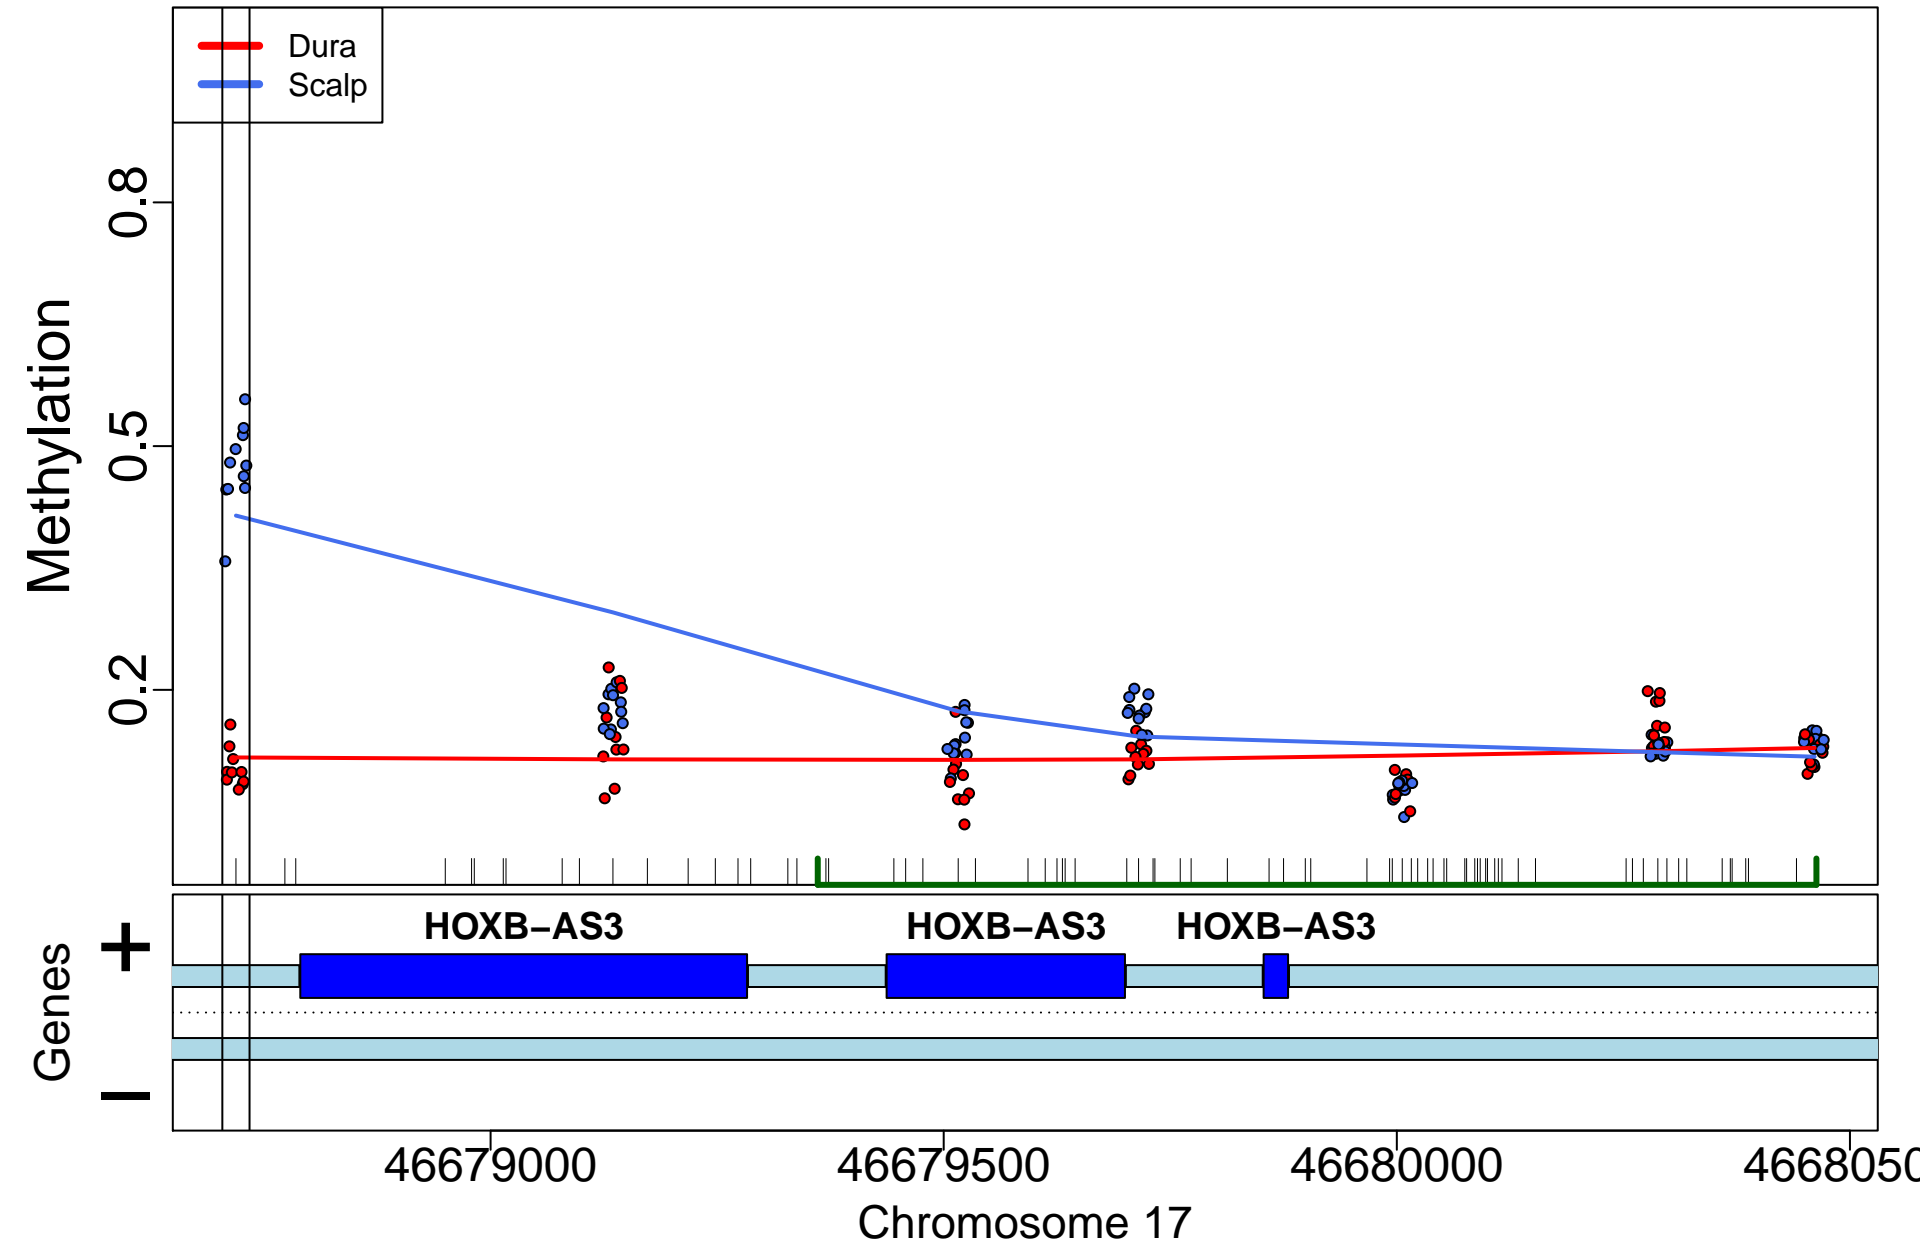

# HOXA11-AS; 0bp from tss:NA

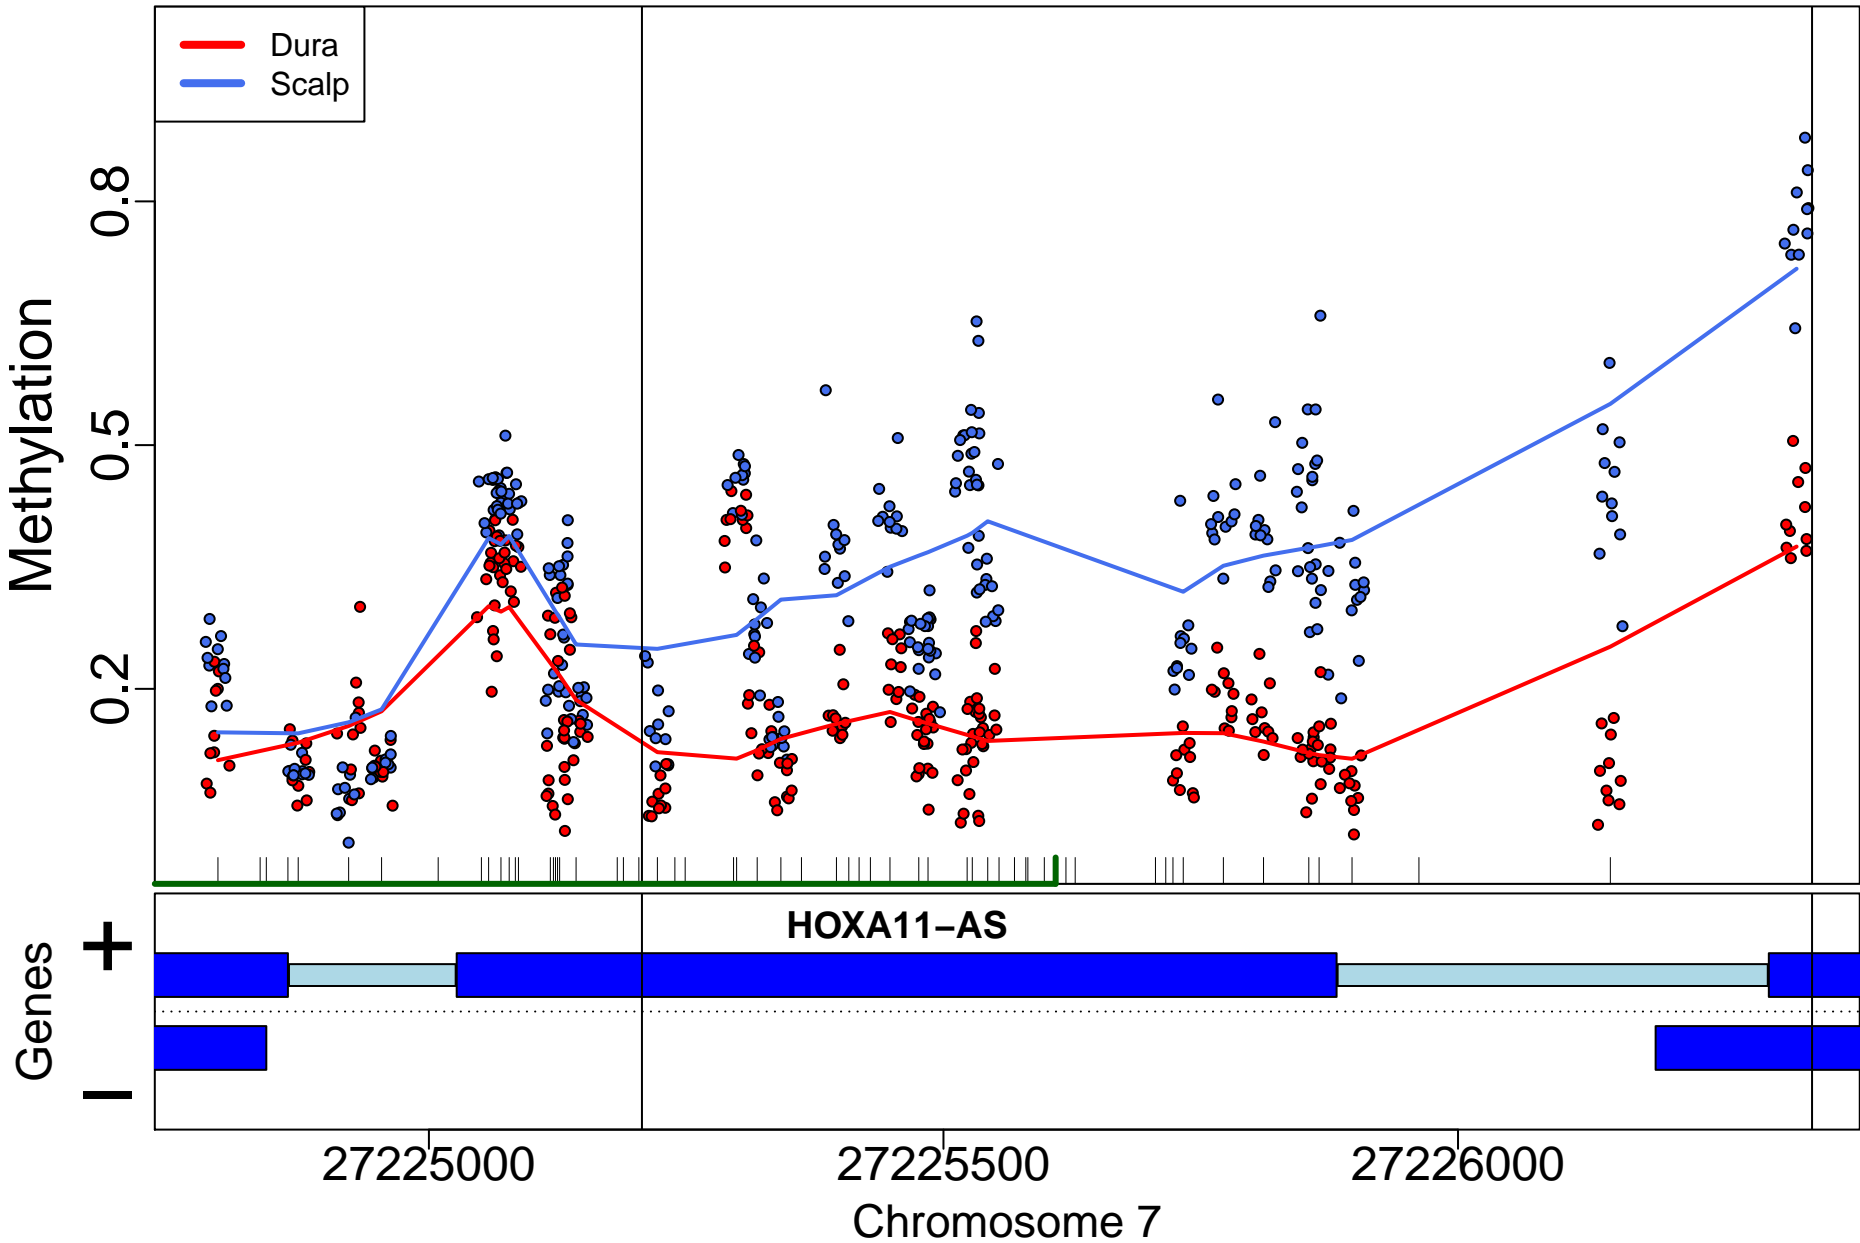

GJB6; 639bp from tss:inside intron

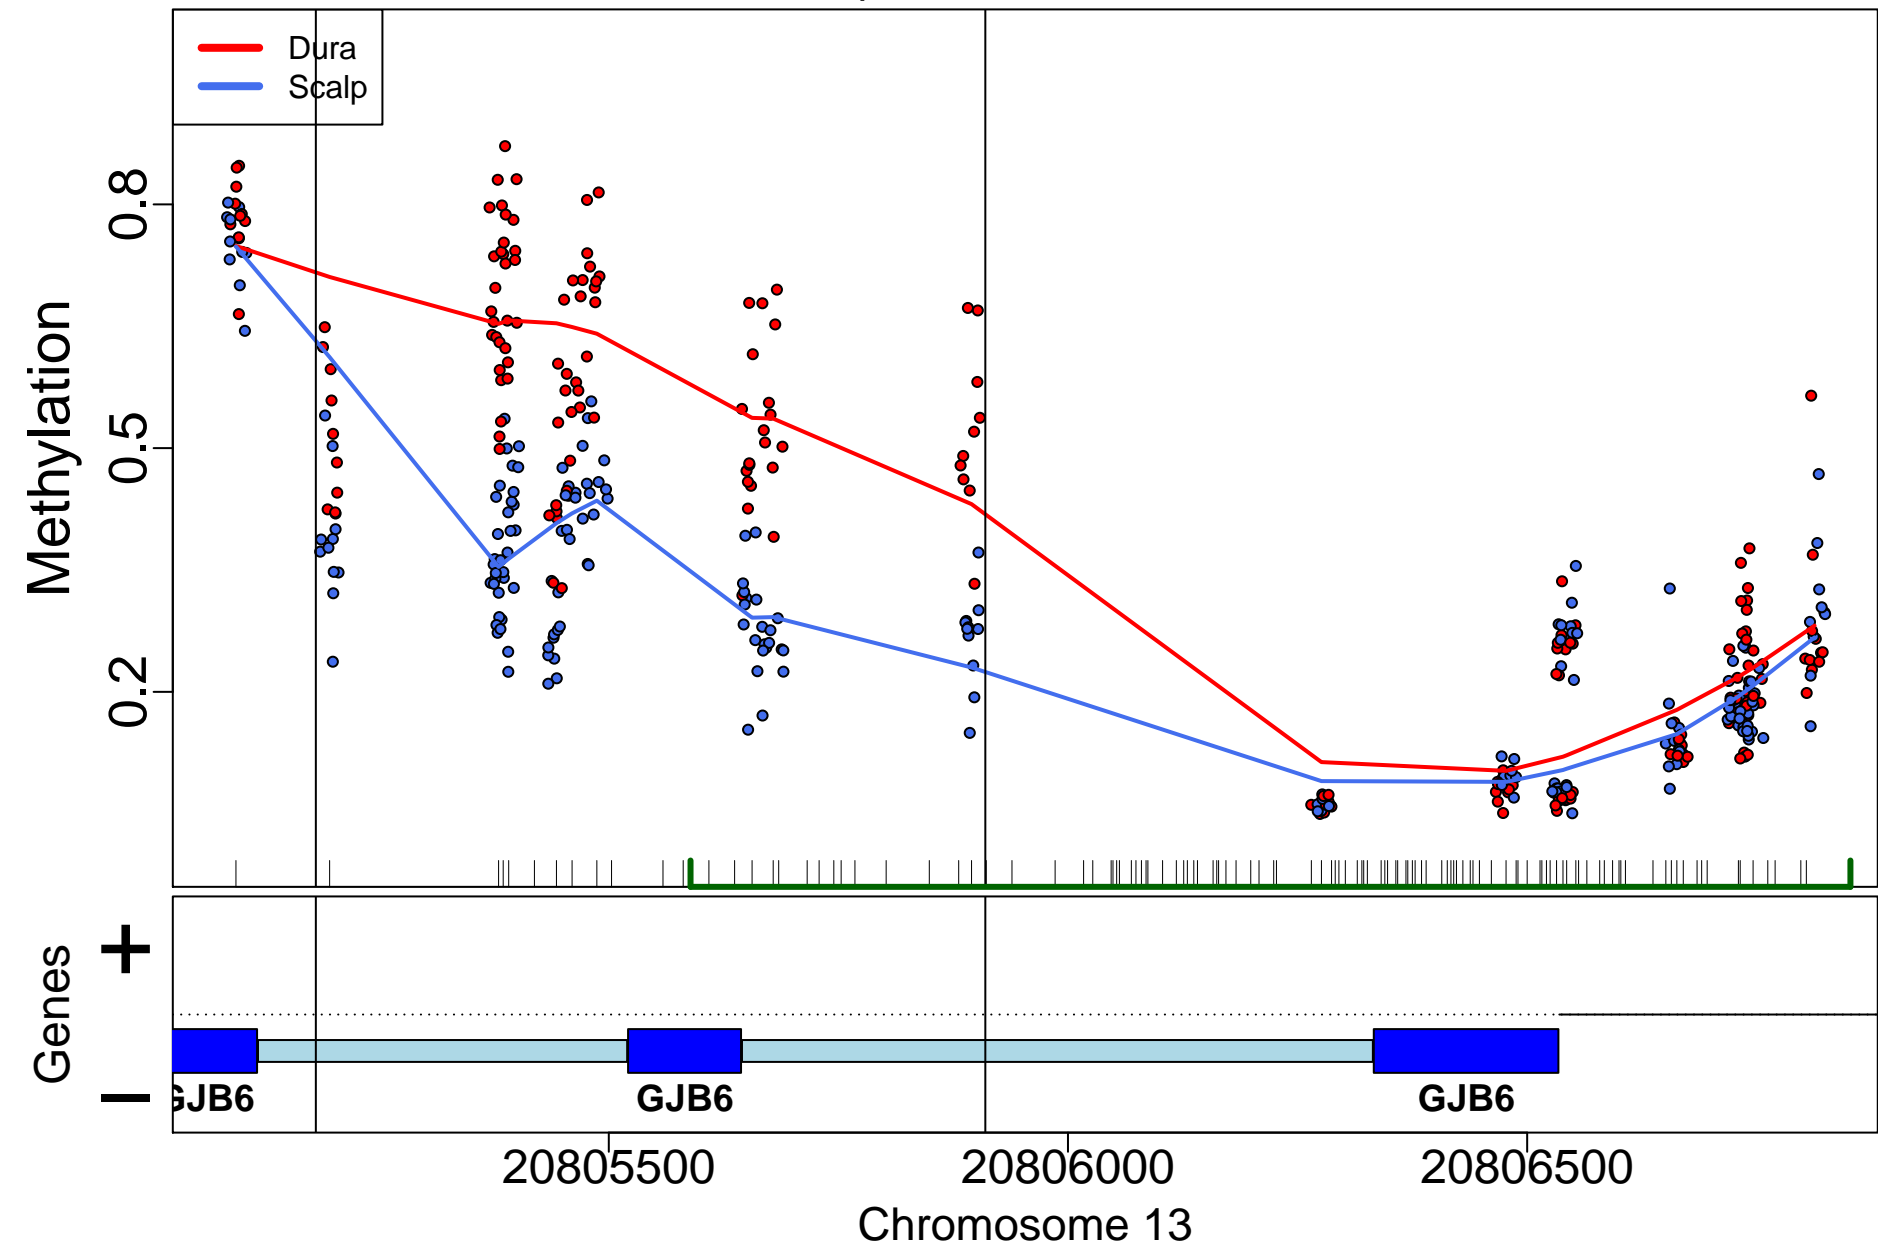

PRAC1; 0bp from tss:overlaps 5'

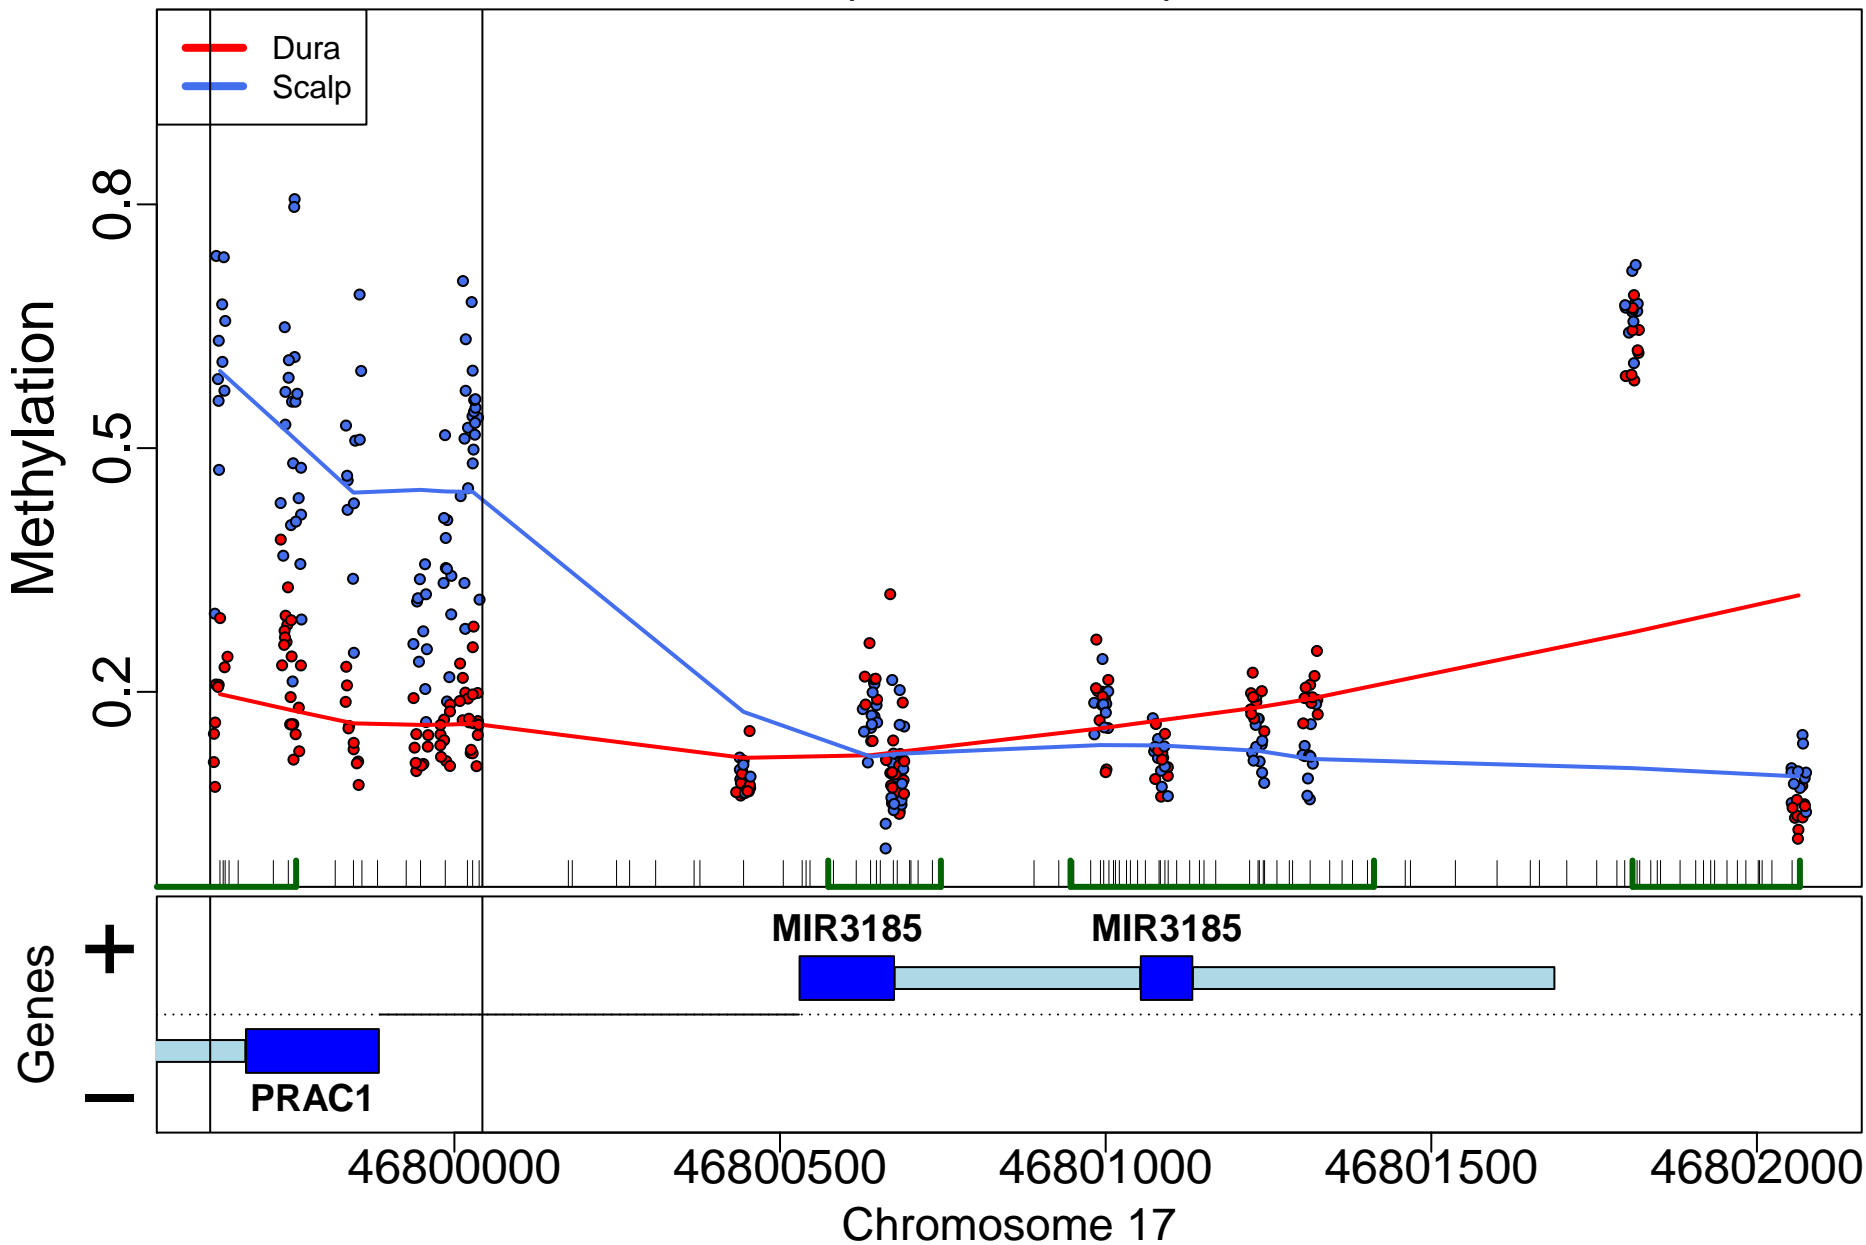

IRX1; 5156bp from tss:upstream

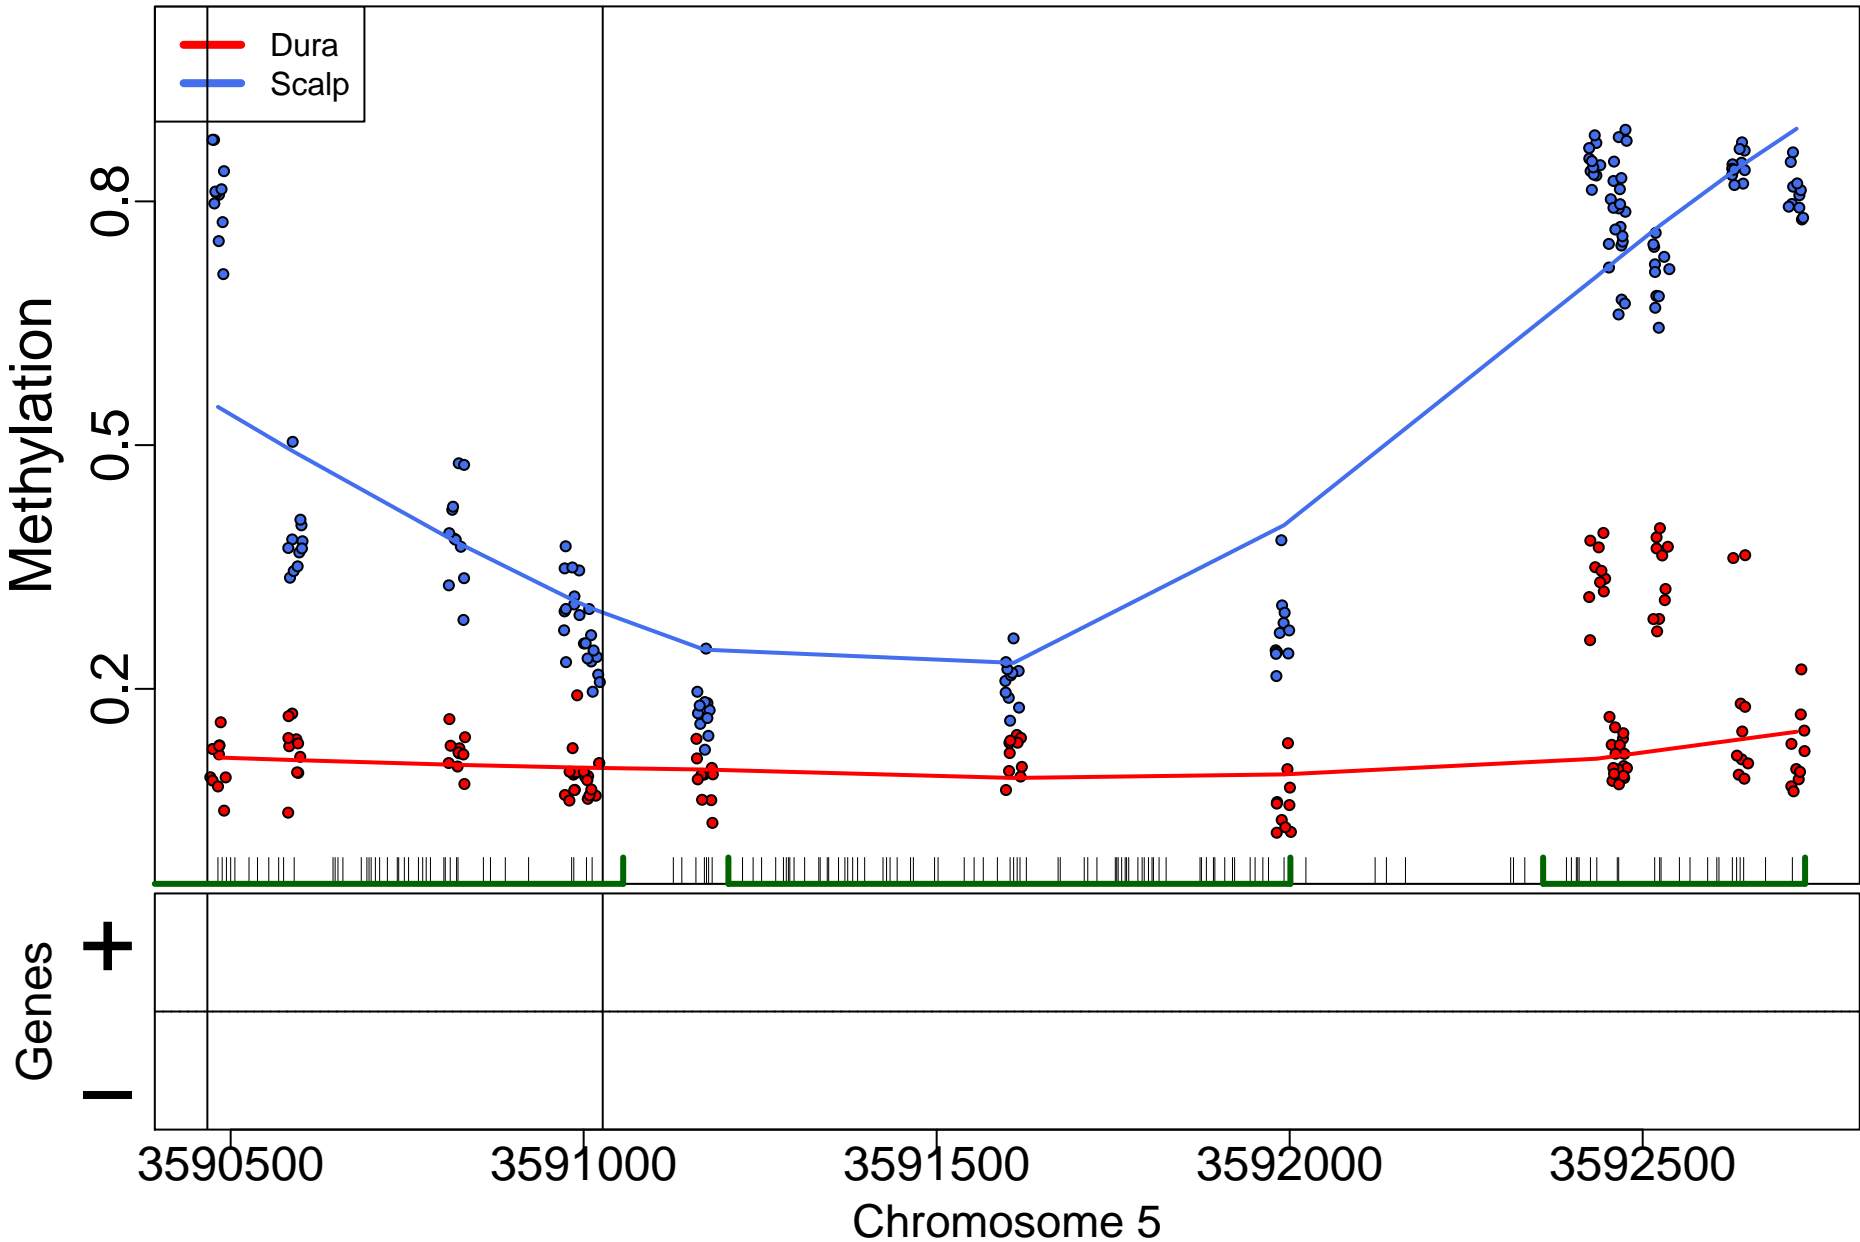



INPP5A; 53520bp from tss:inside intron

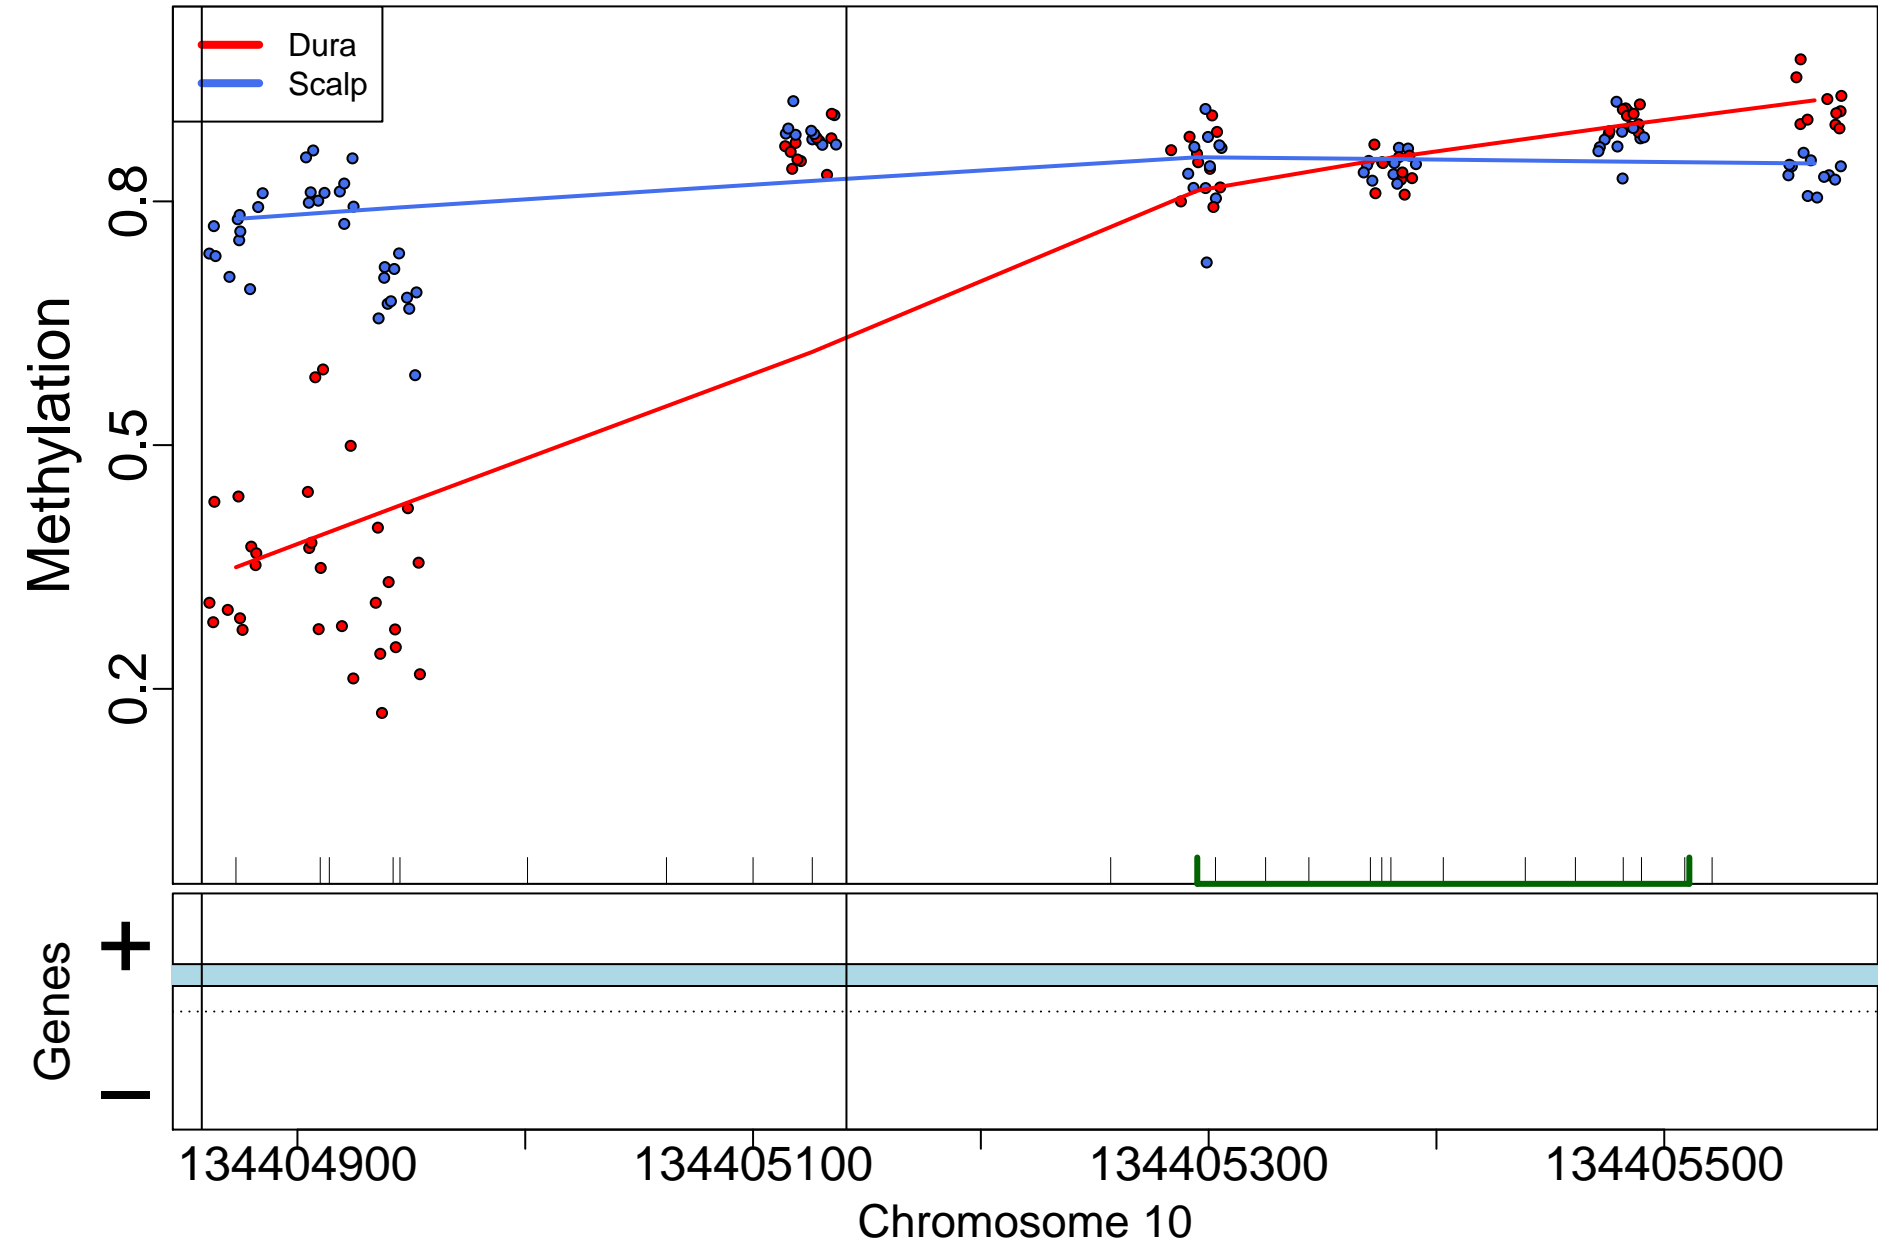

RGS10; 879bp from tss:inside intron

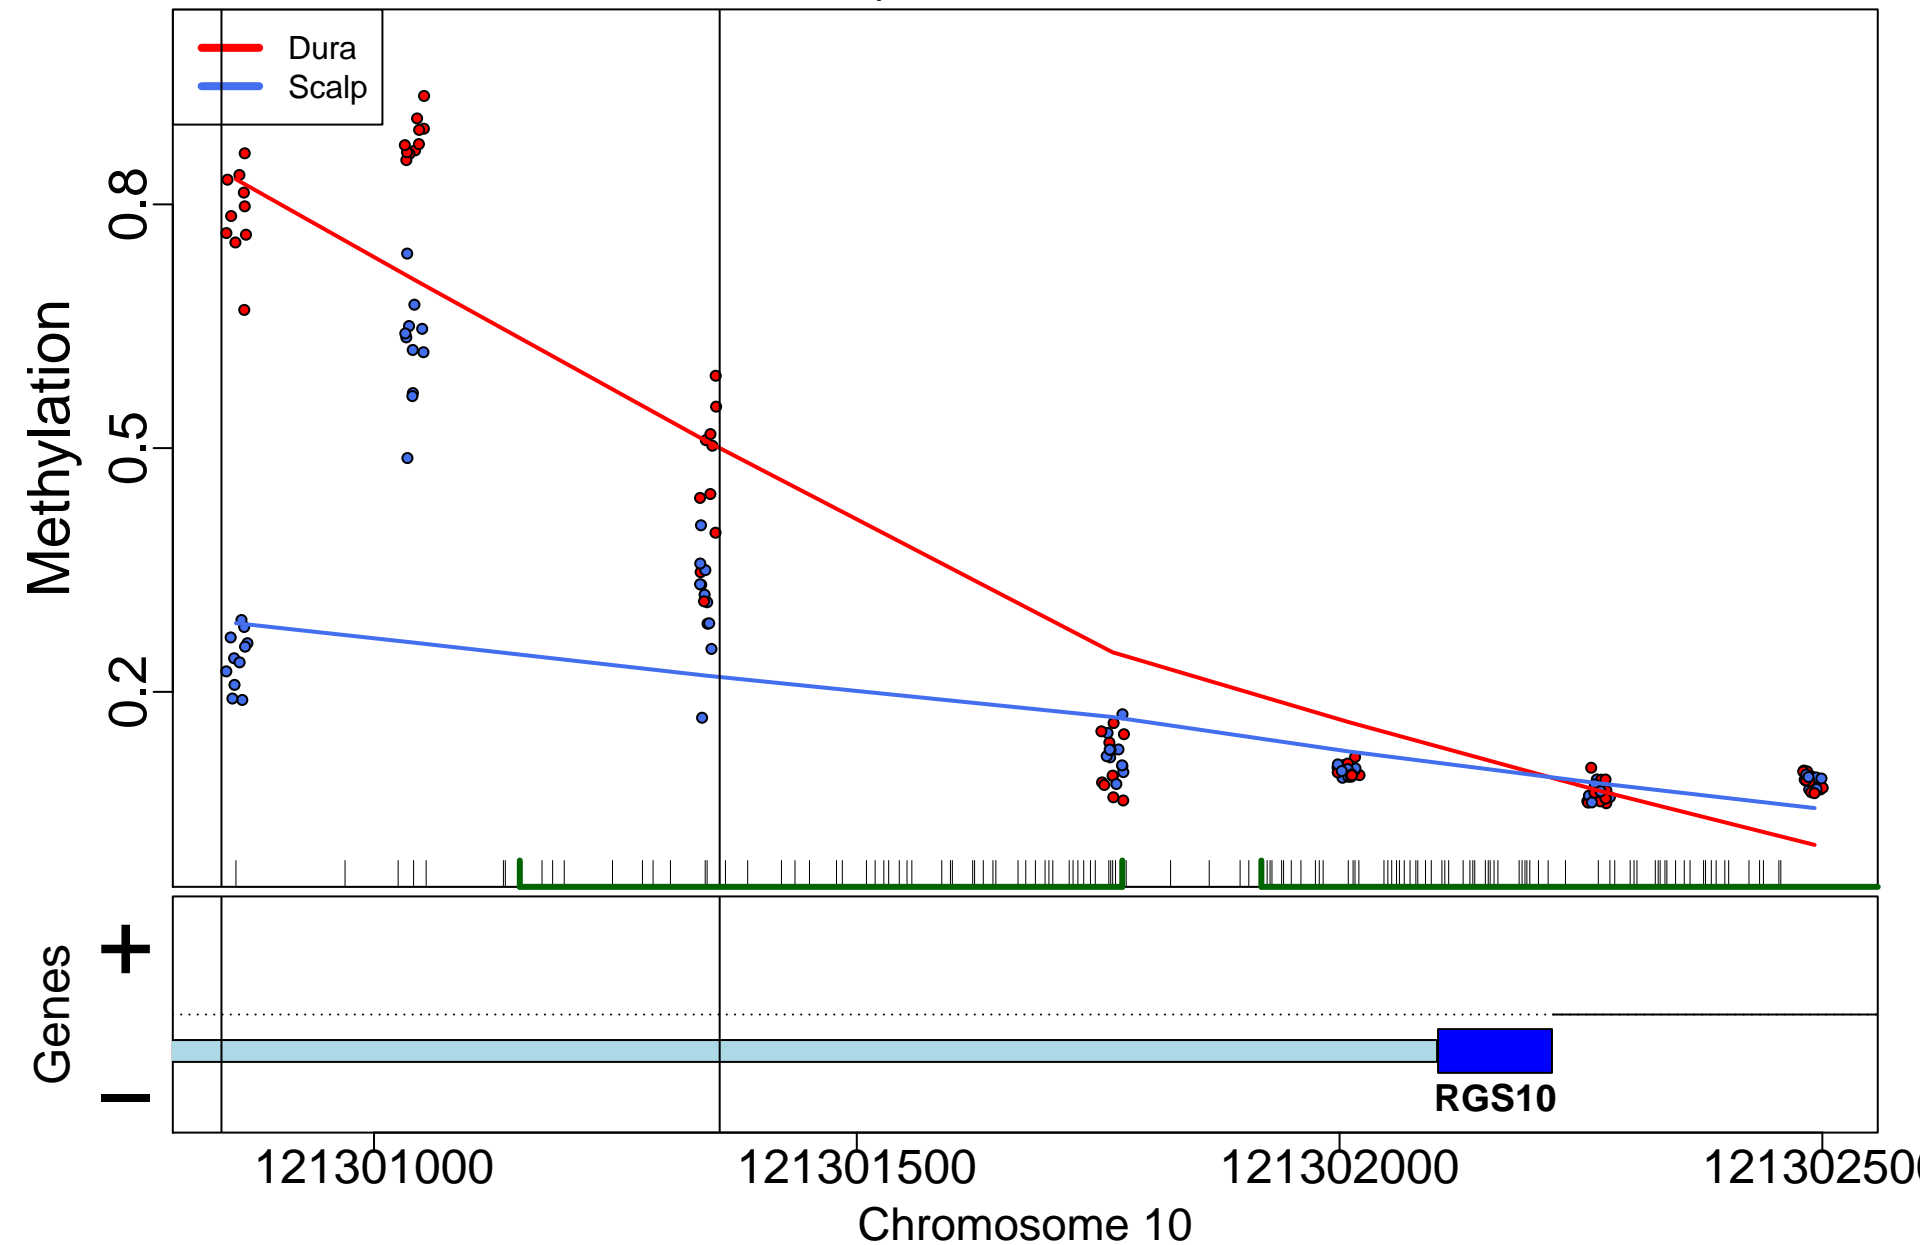

THBS2; 113874bp from tss:downstream

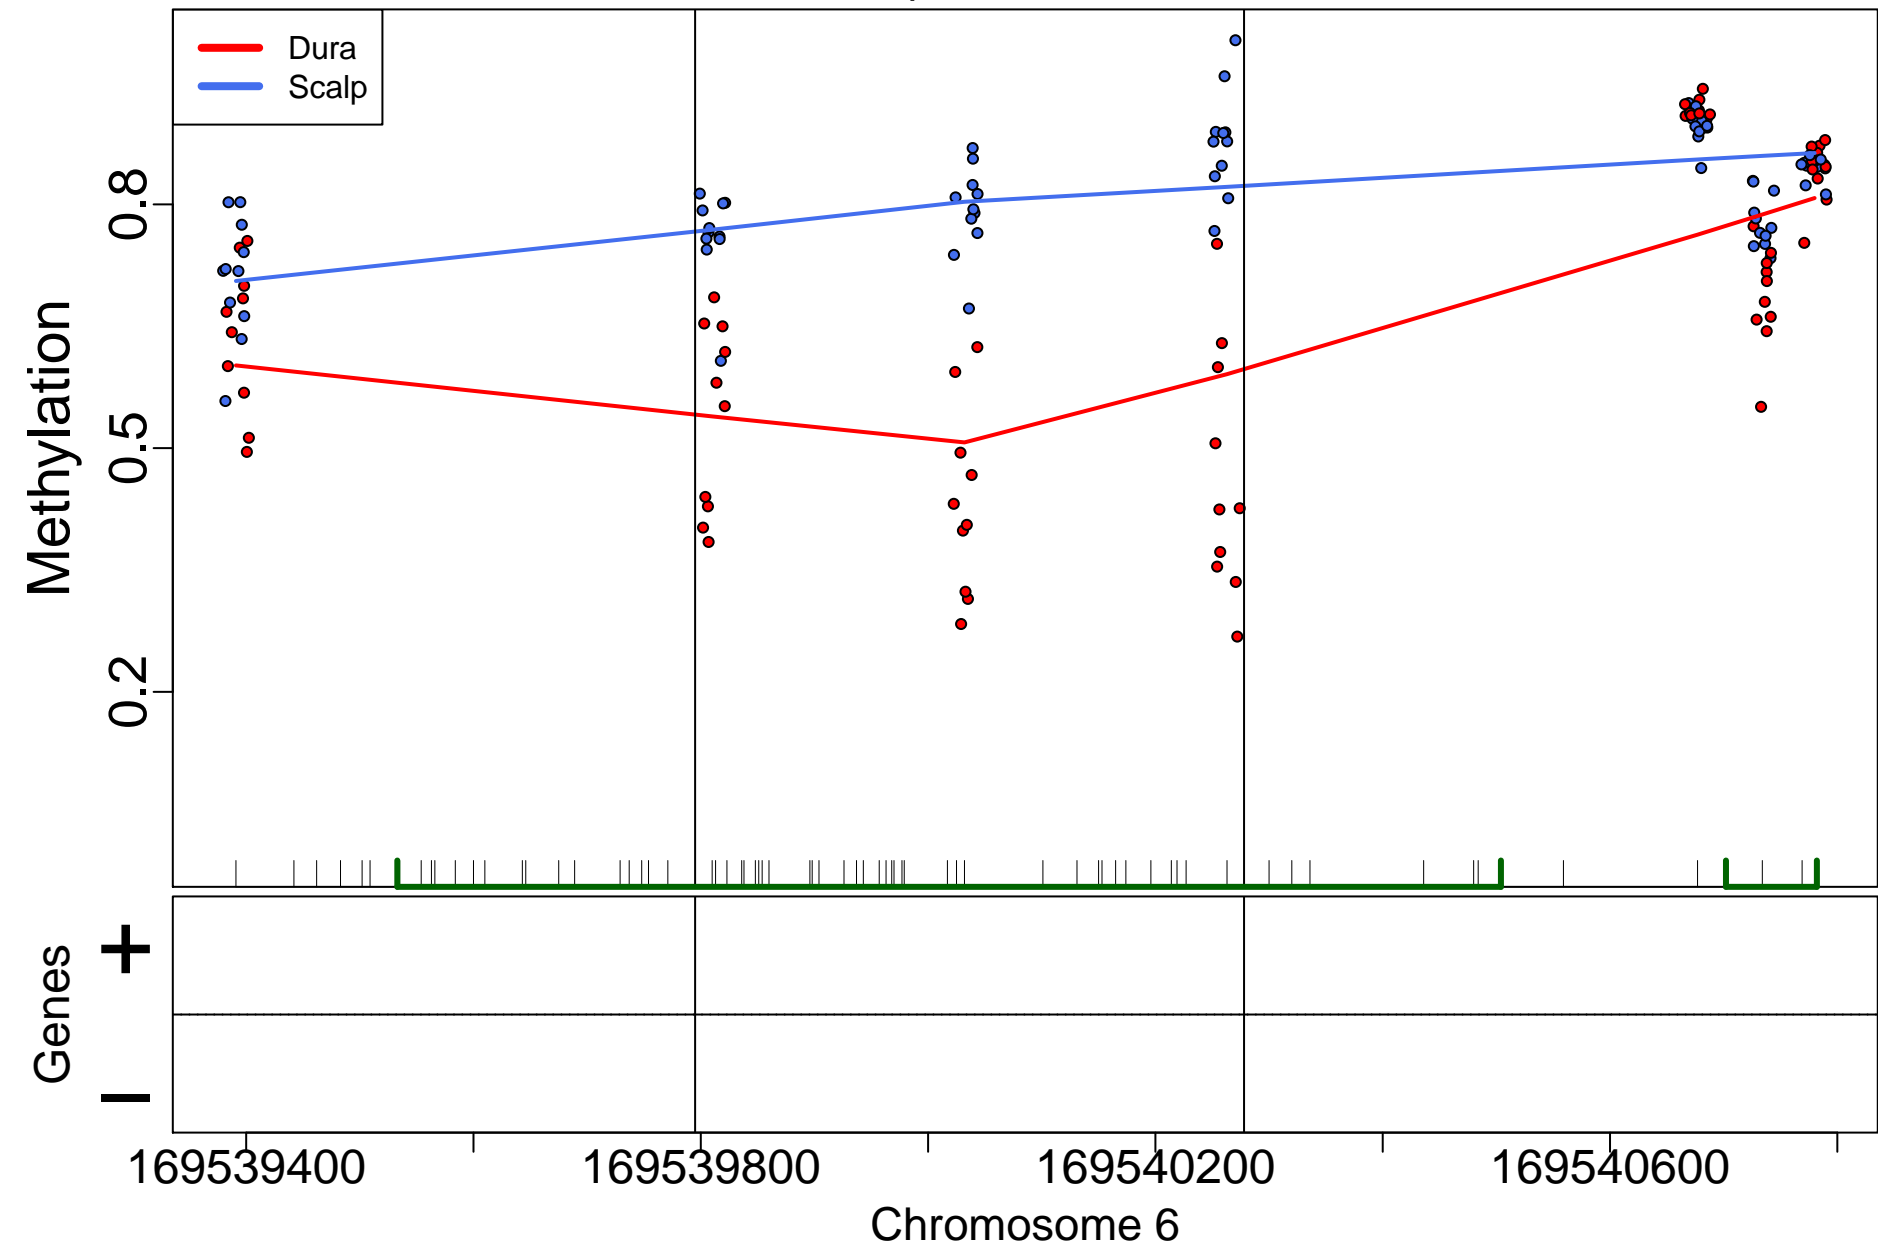

LINC01168; 0bp from tss:NA

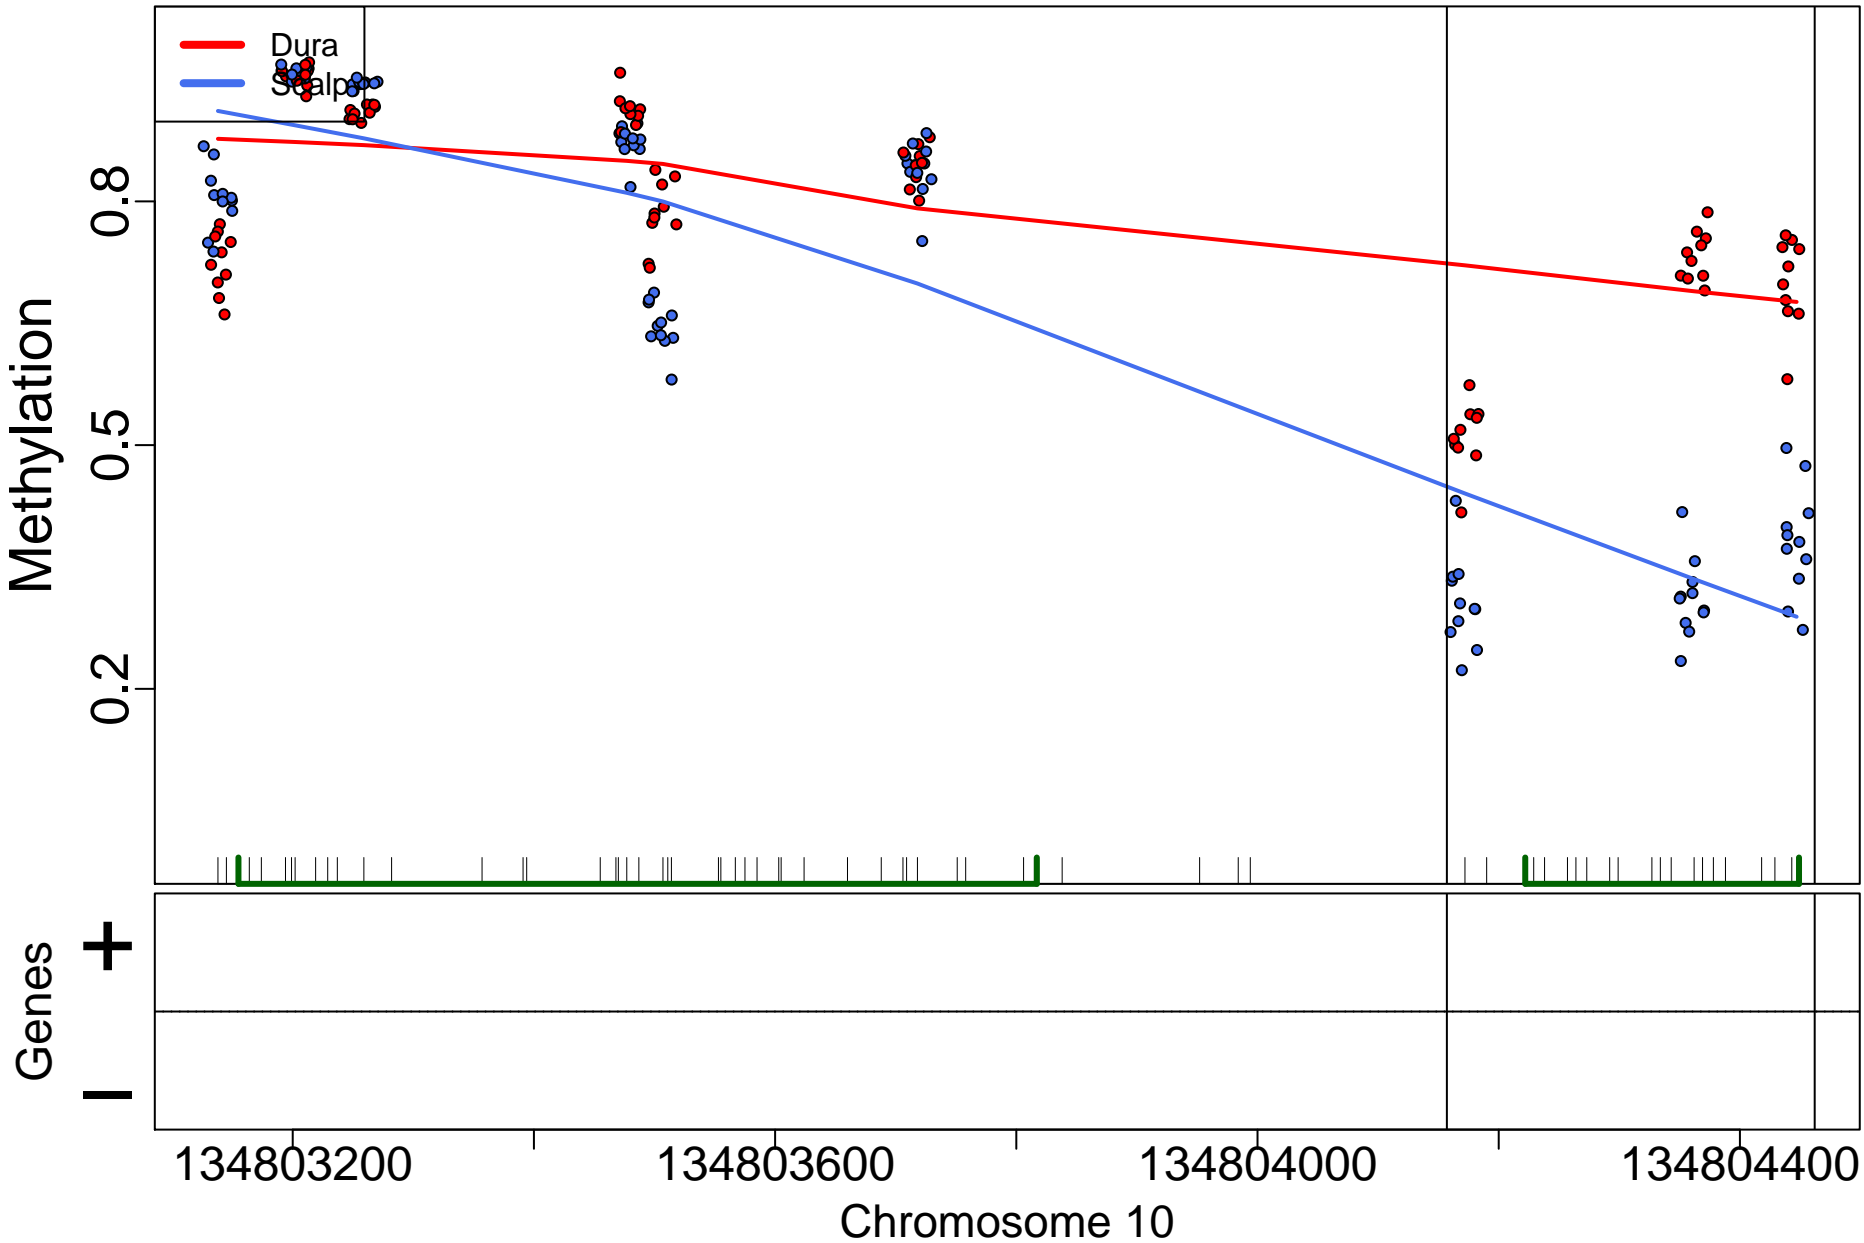

DRAM1; 1031bp from tss:inside intron

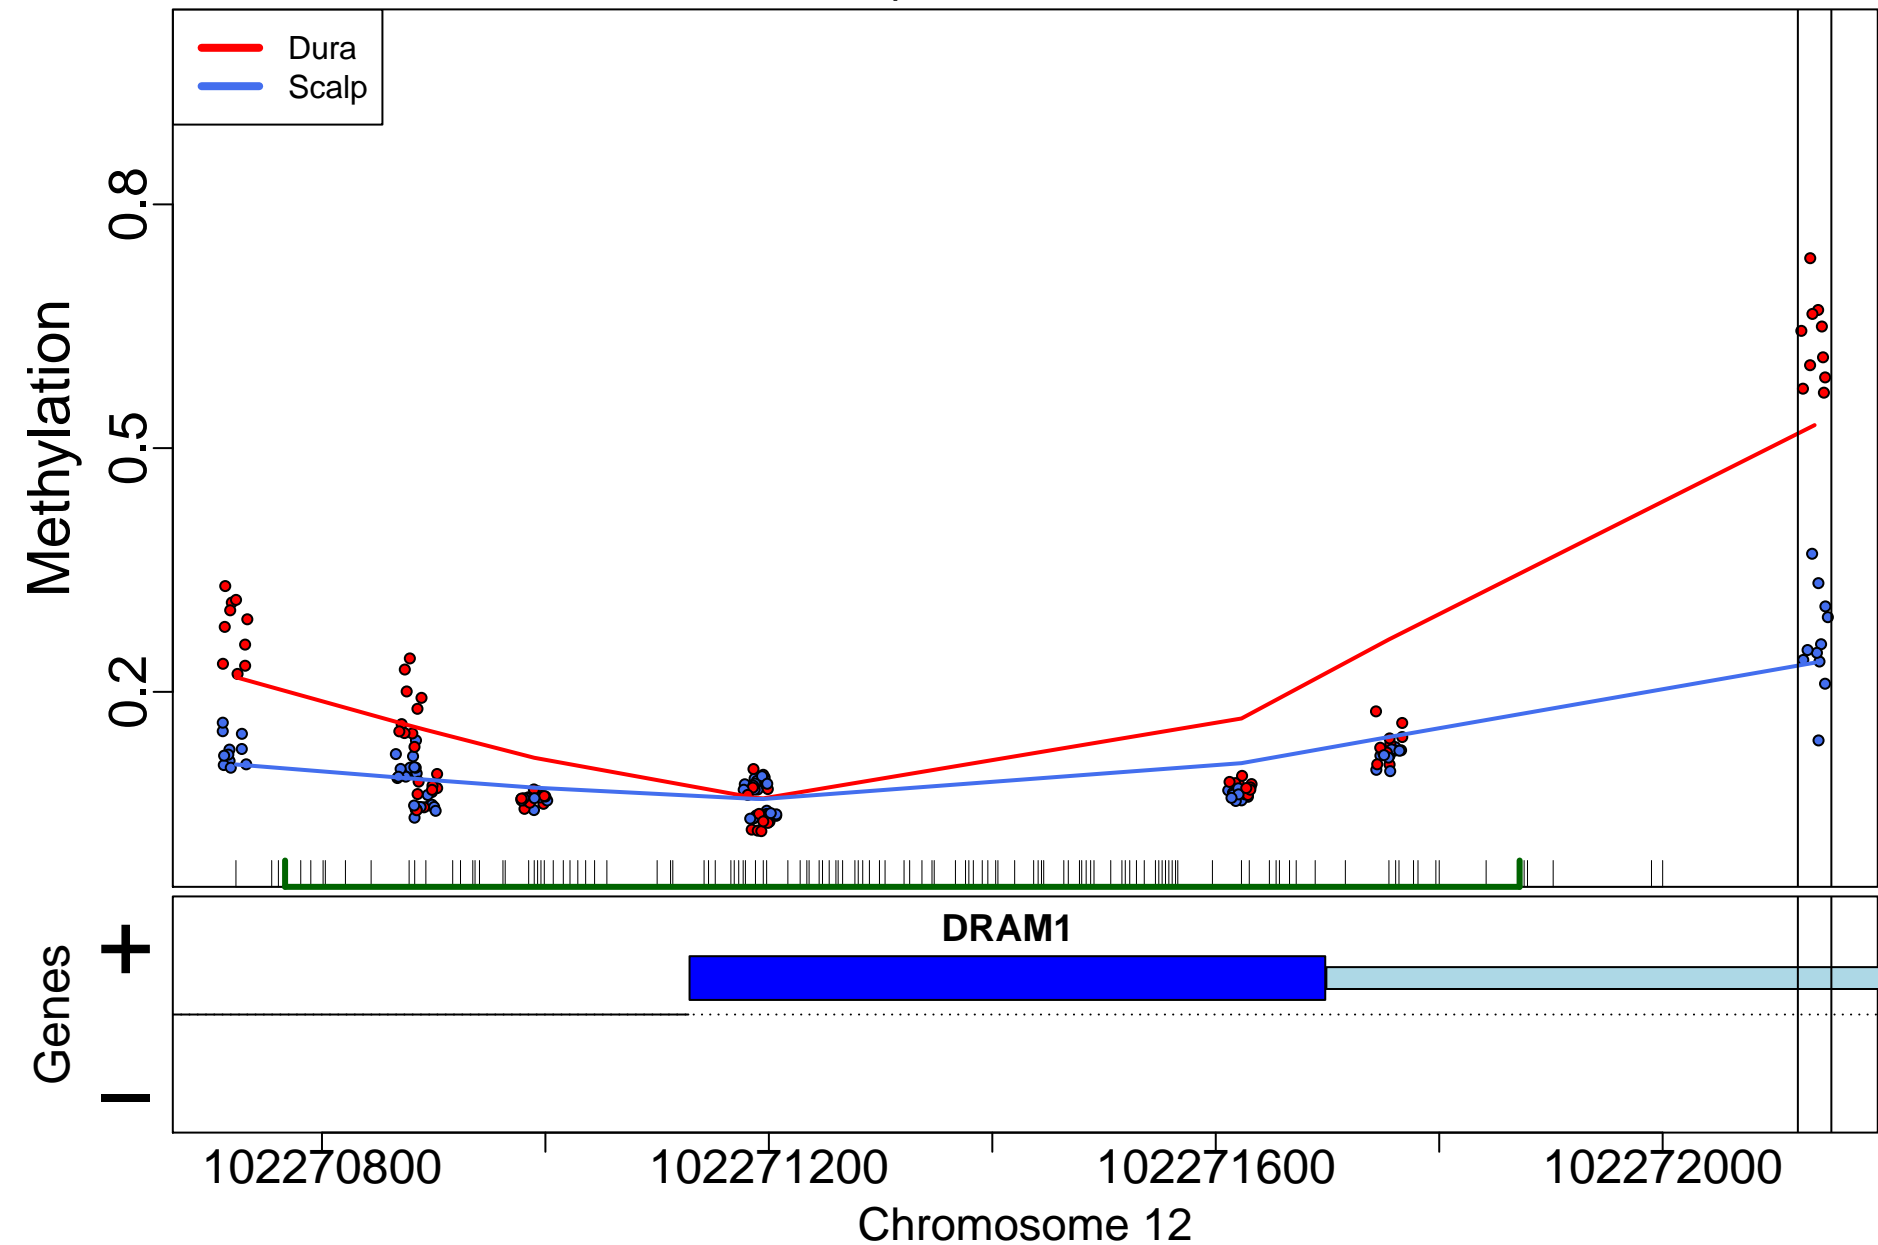

CSGALNACT1; 75391bp from tss:inside intron

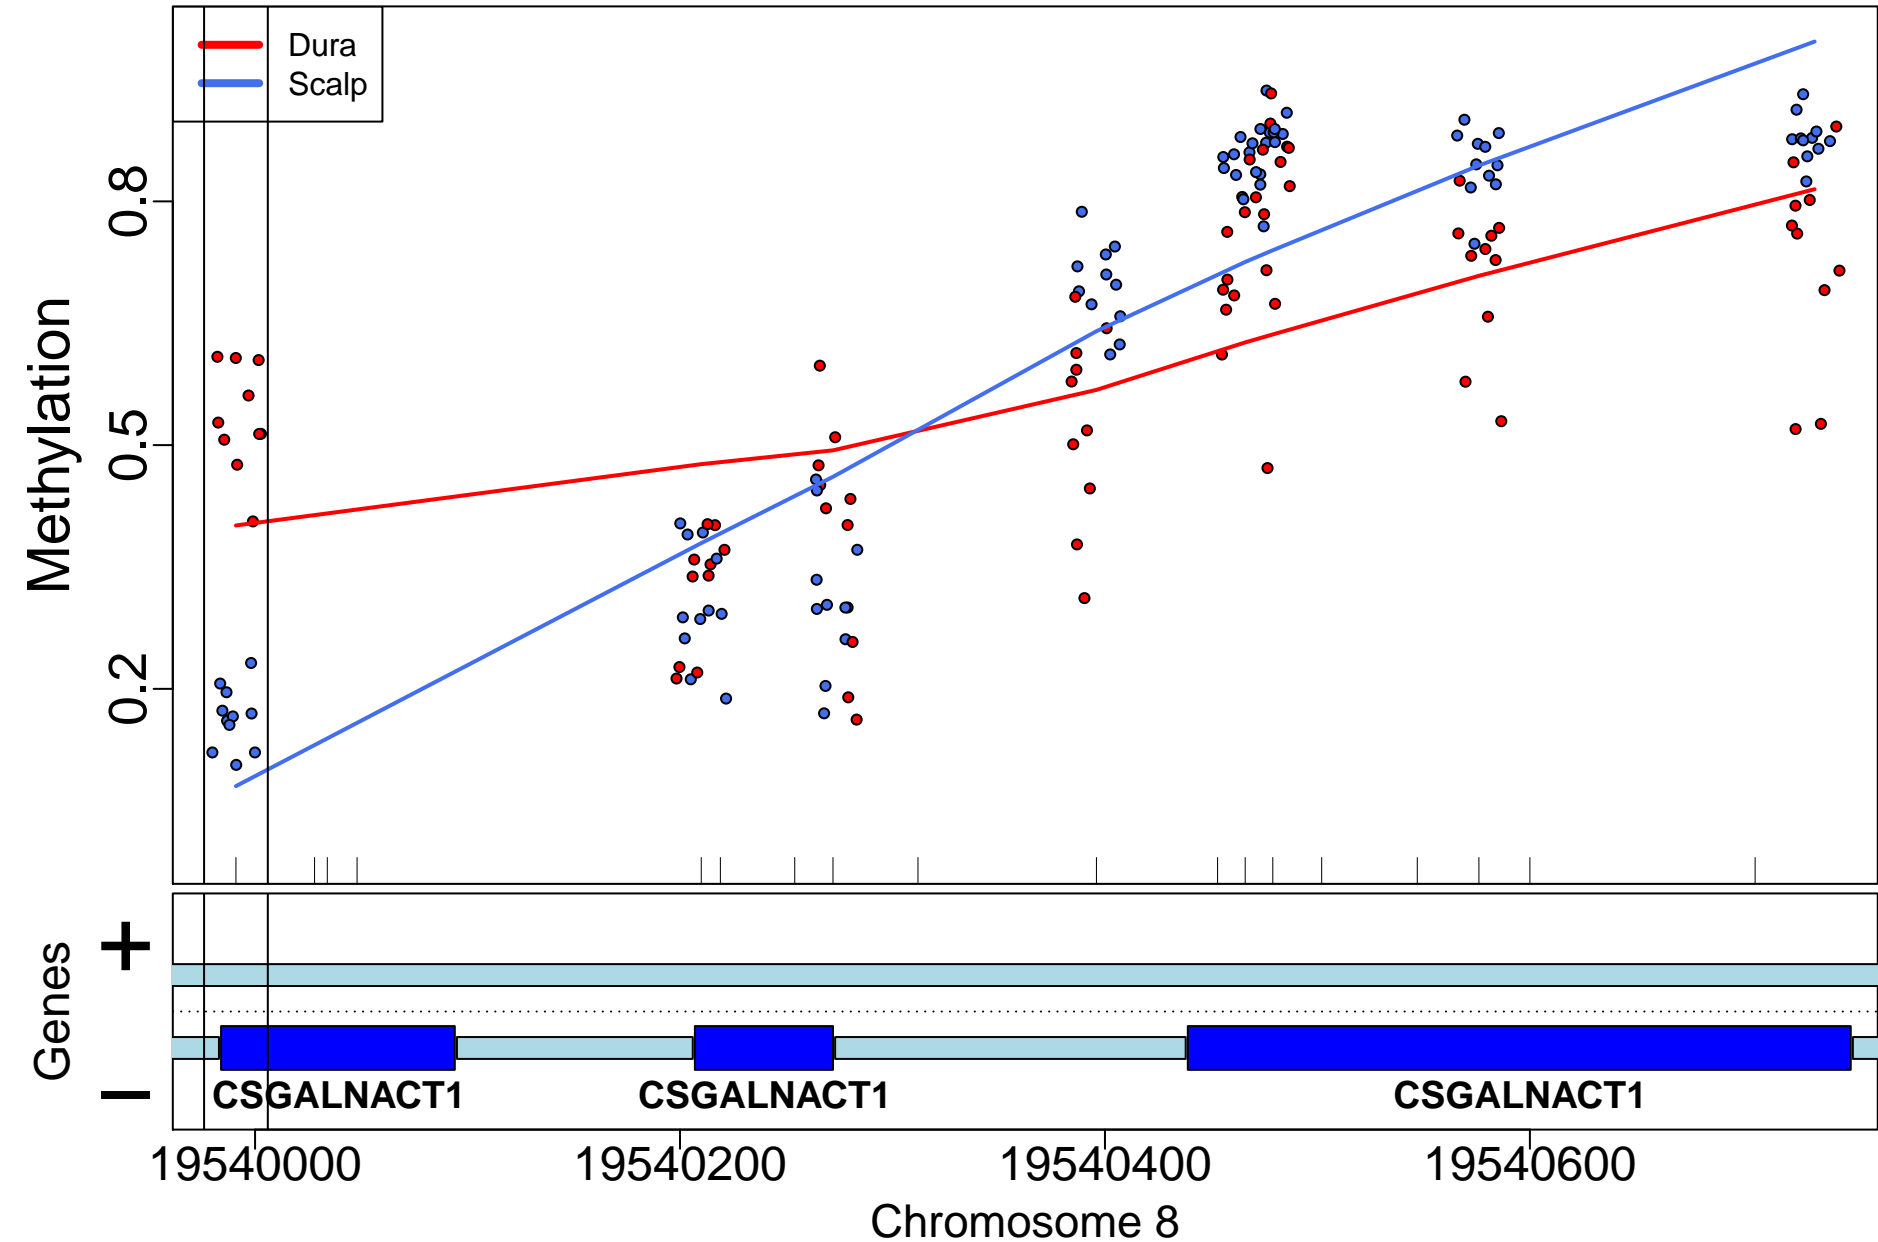

OTP; 7526bp from tss:upstream

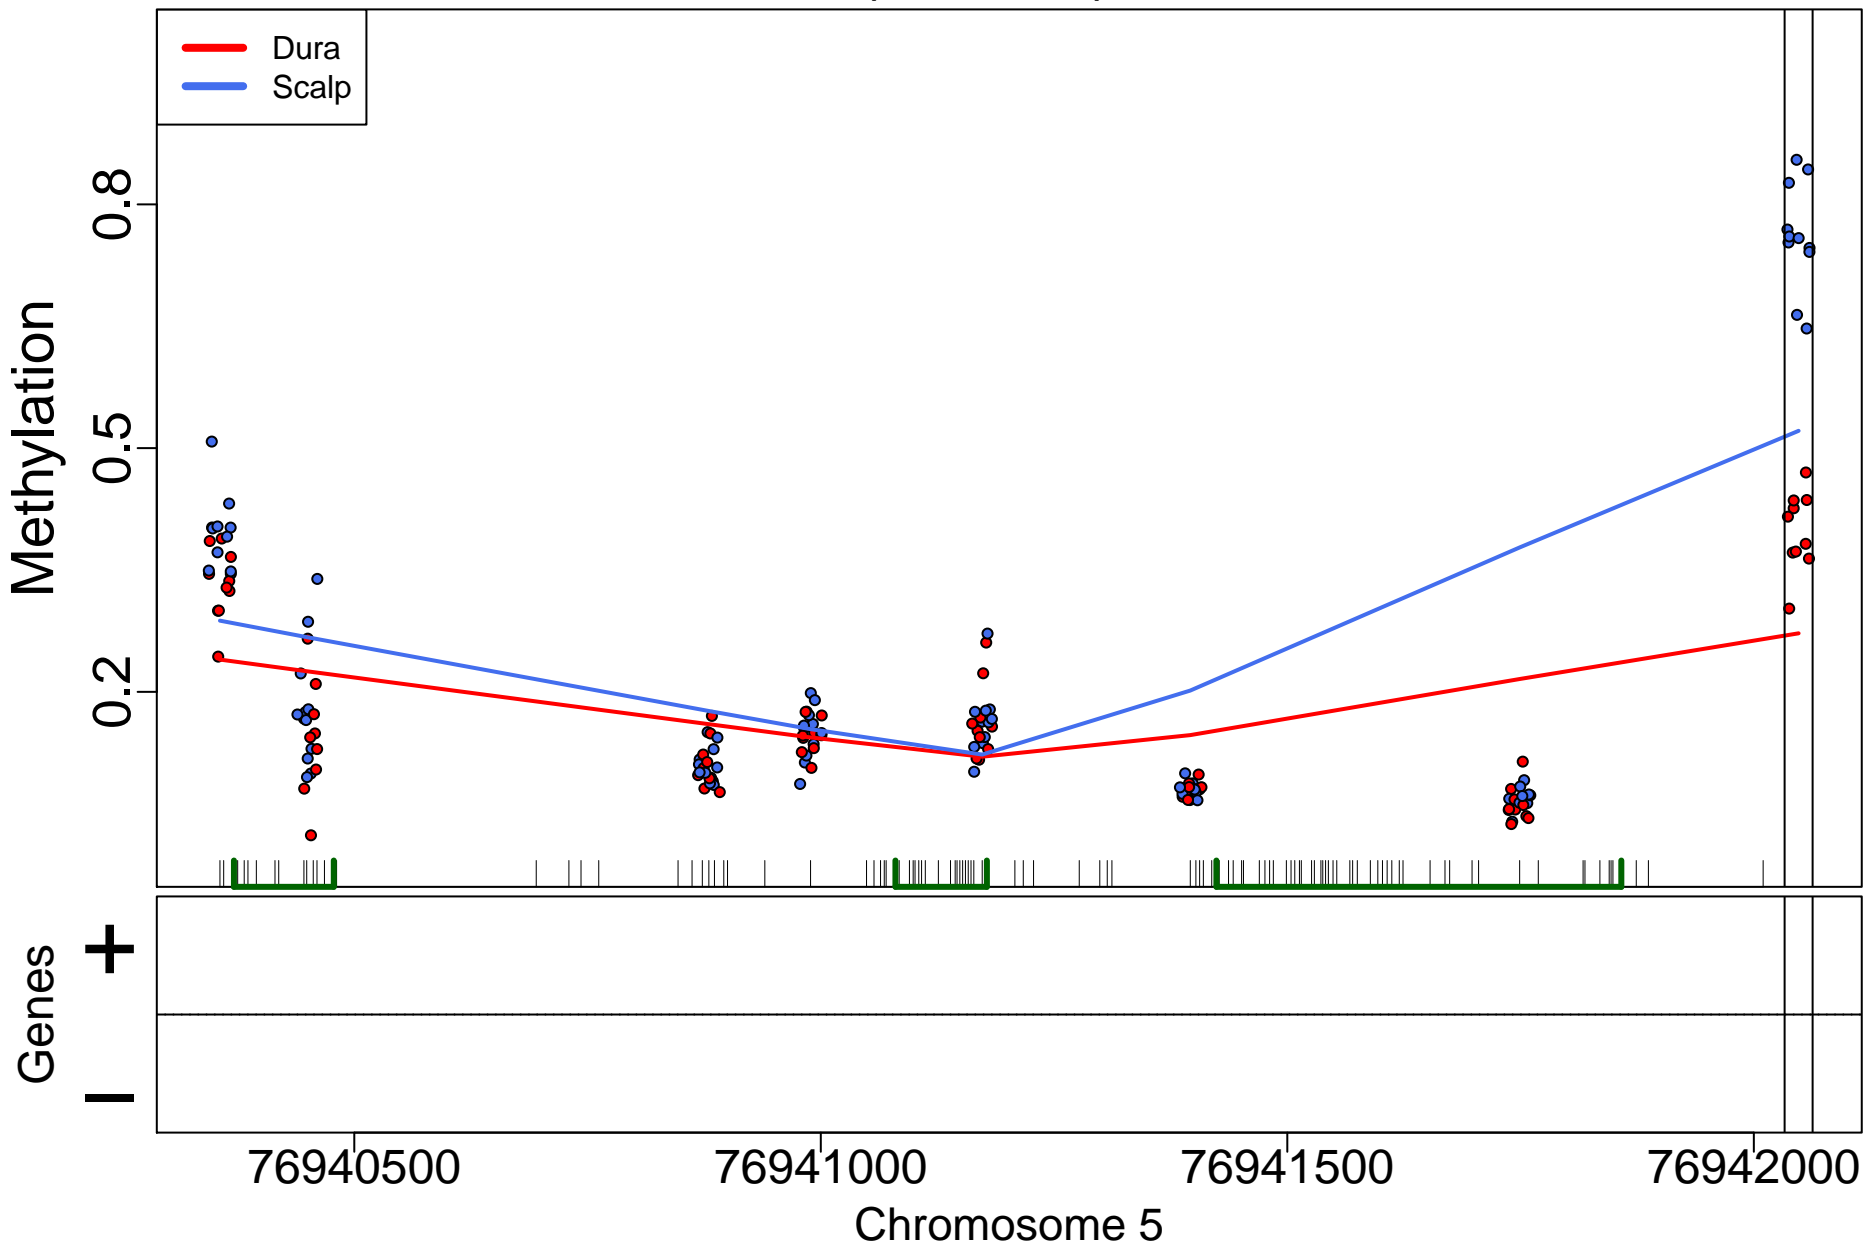

INPP5A; 114212bp from tss:inside intron

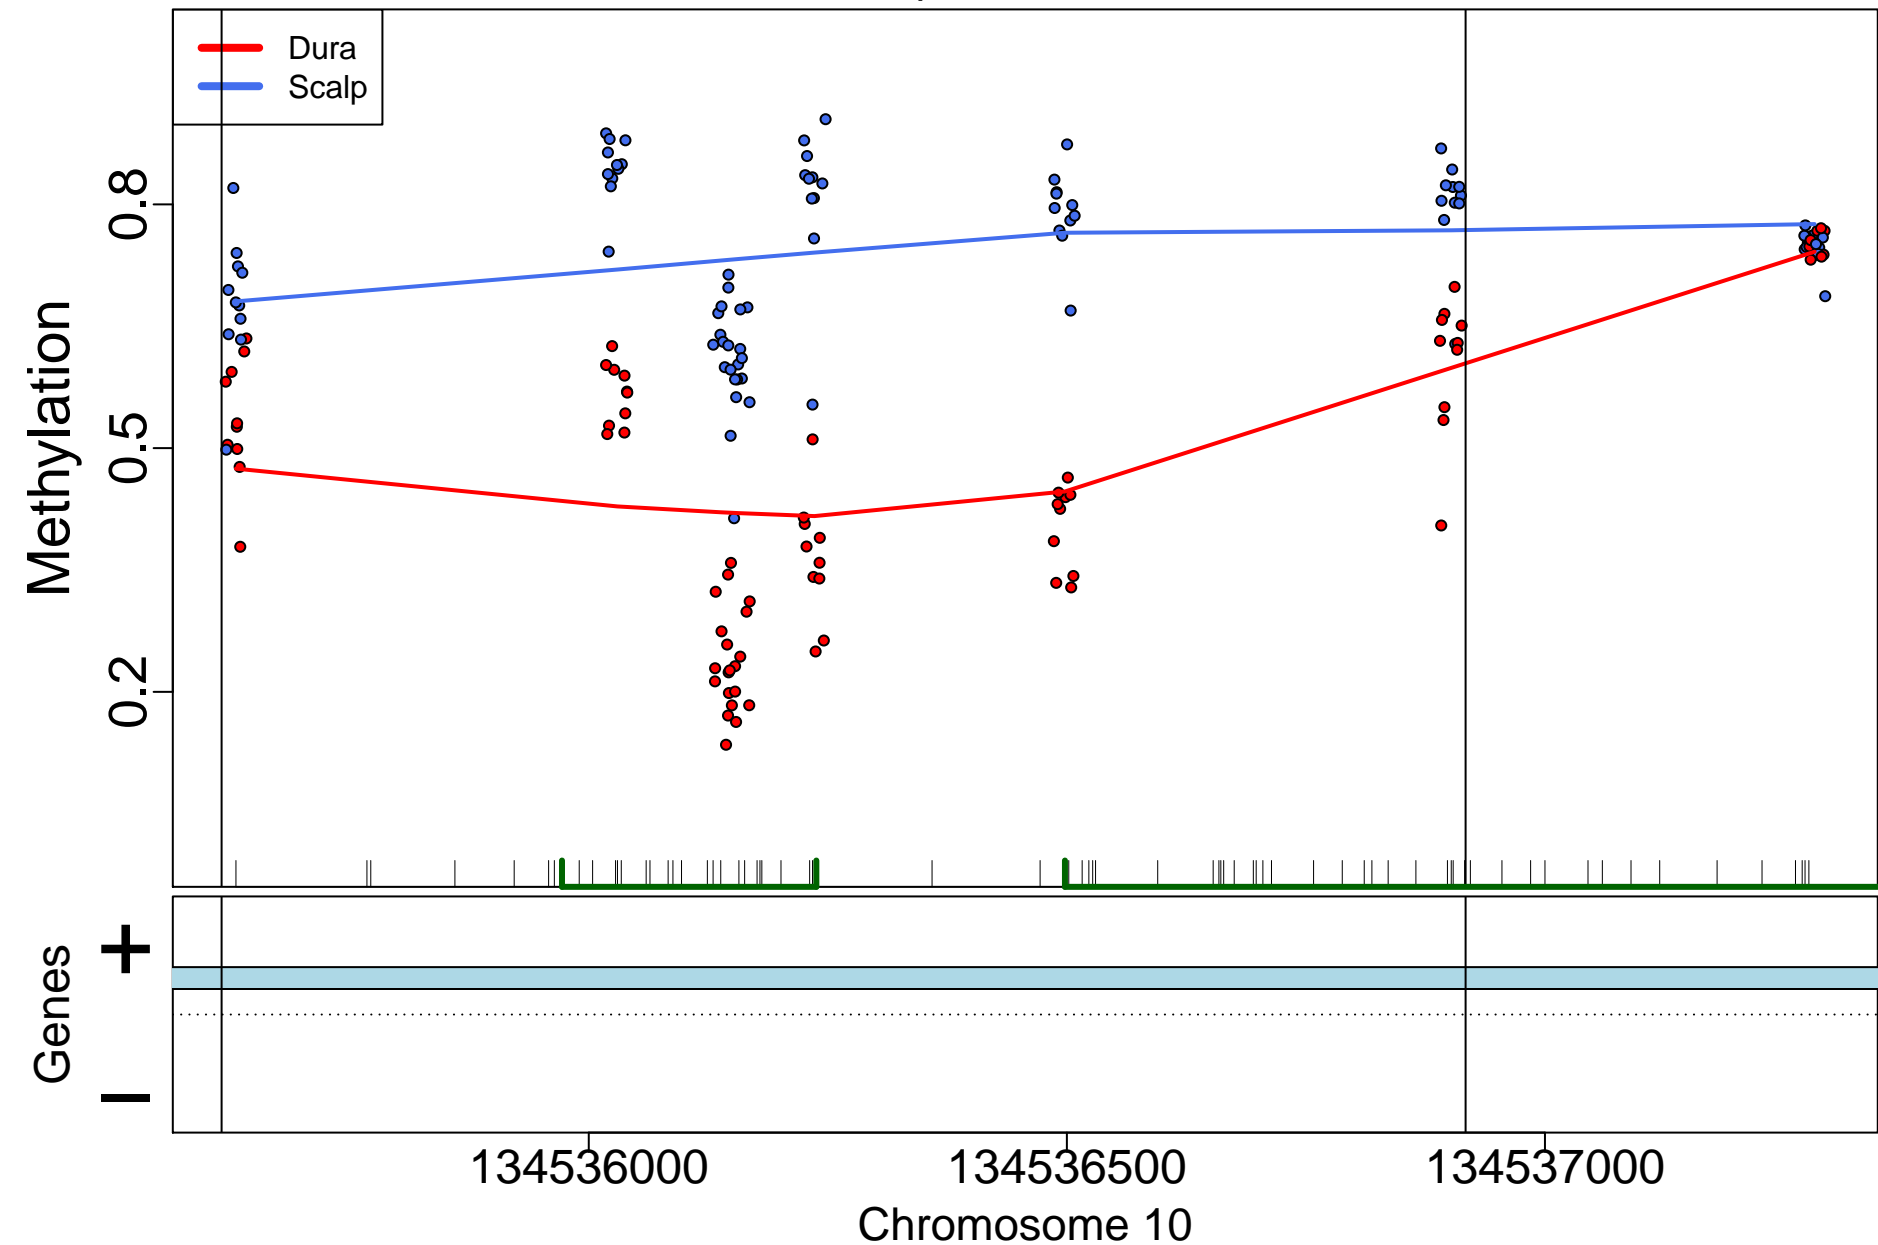



LRBA; 432462bp from tss:inside intron

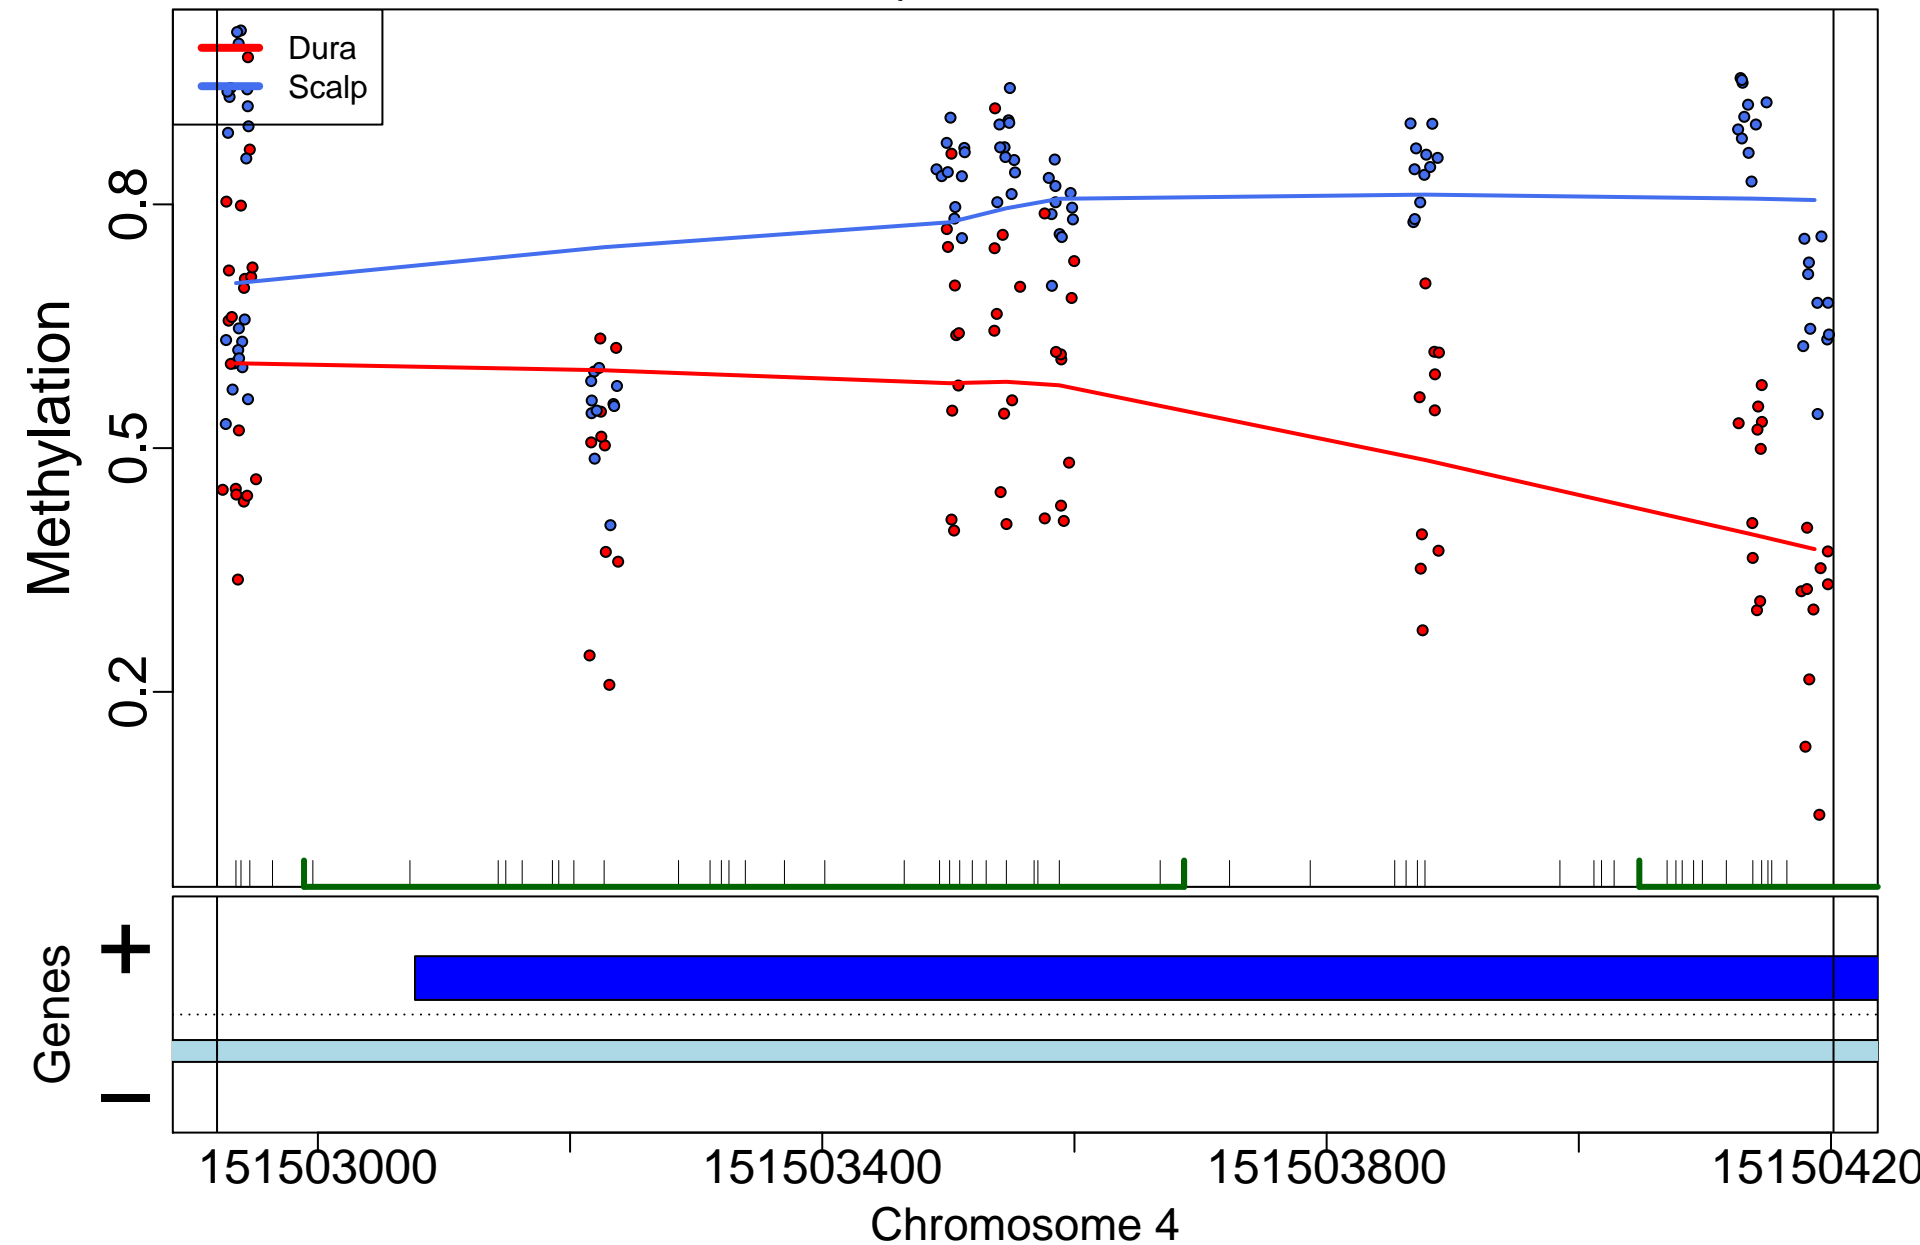

SORCS2; 11165bp from tss:inside intron

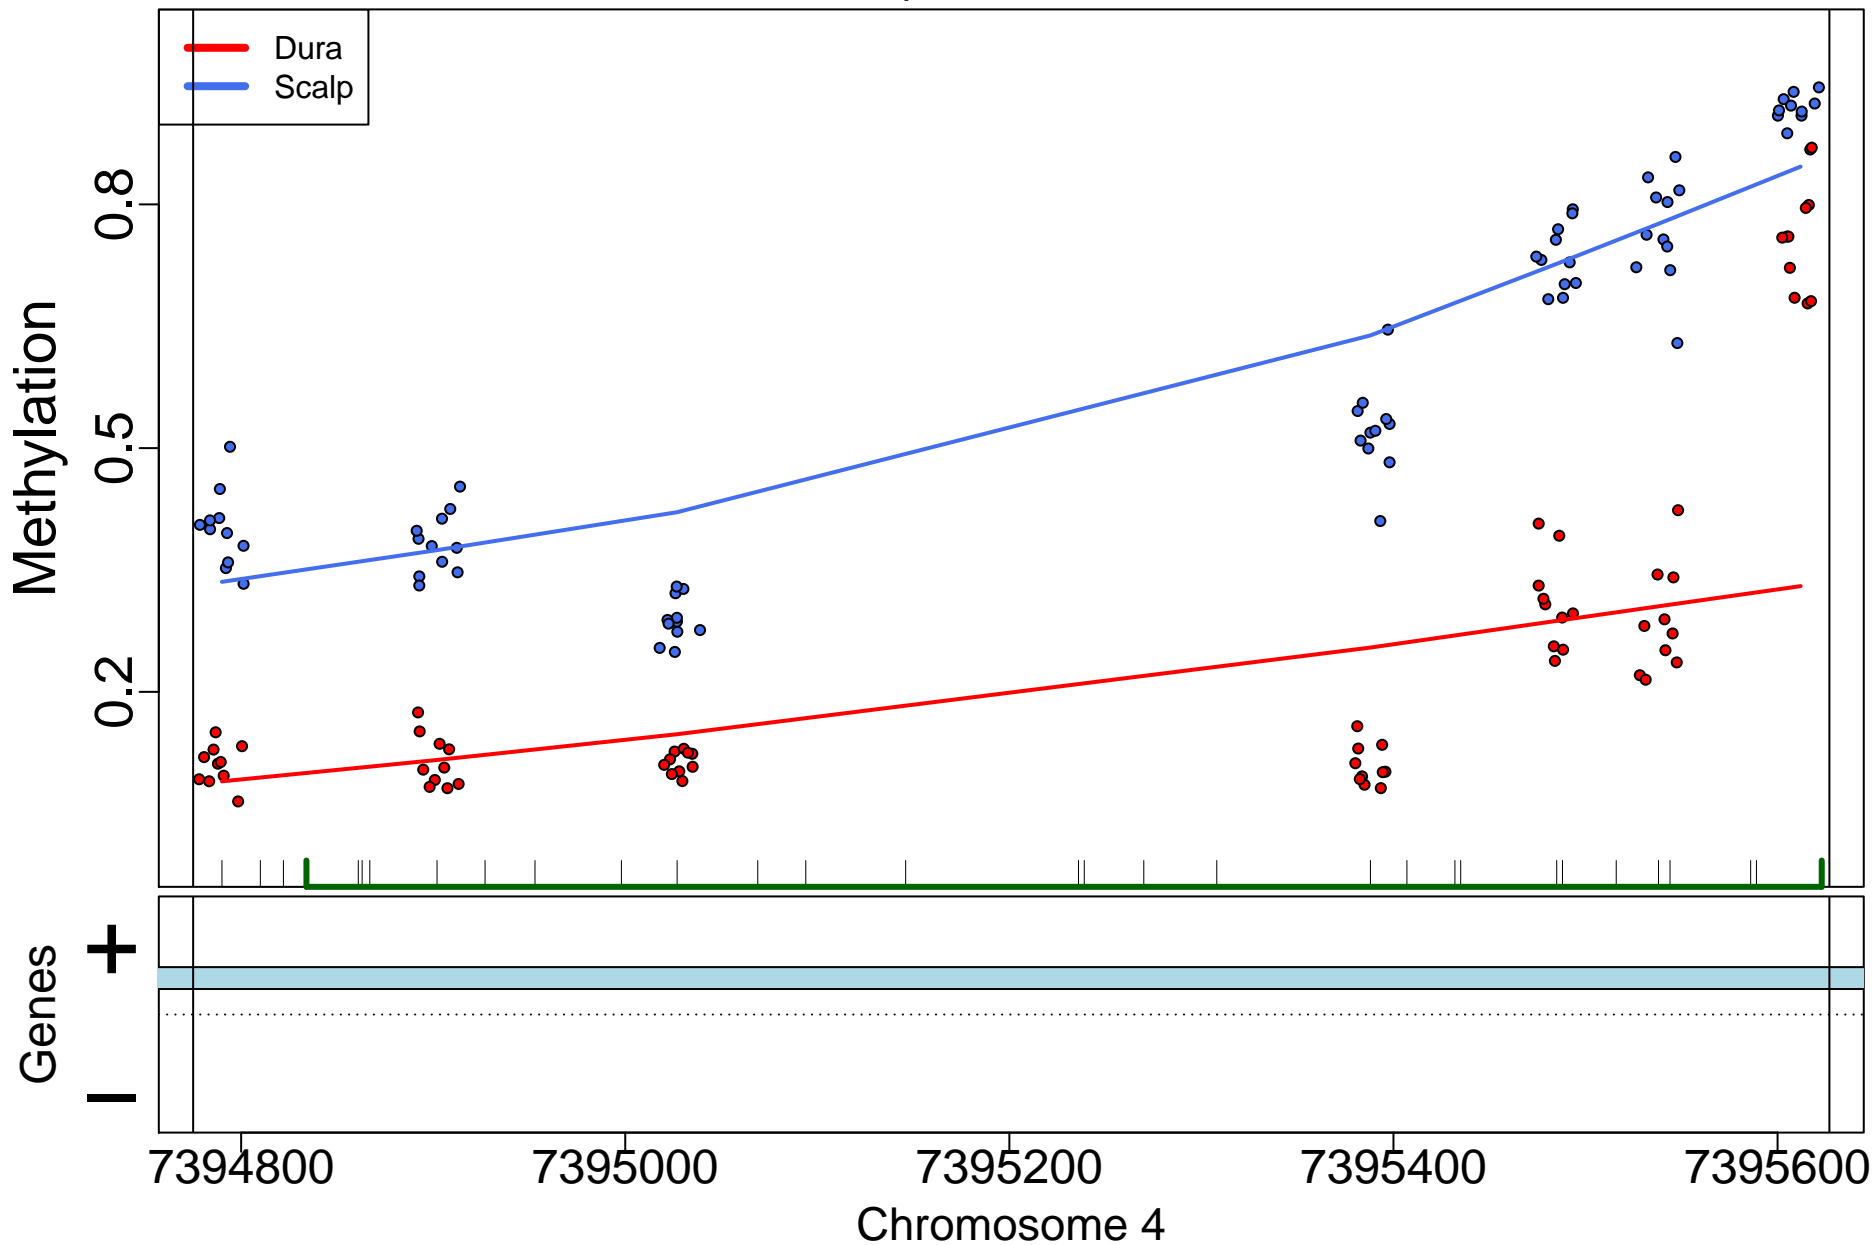

PRDM16; 243224bp from tss:inside intron

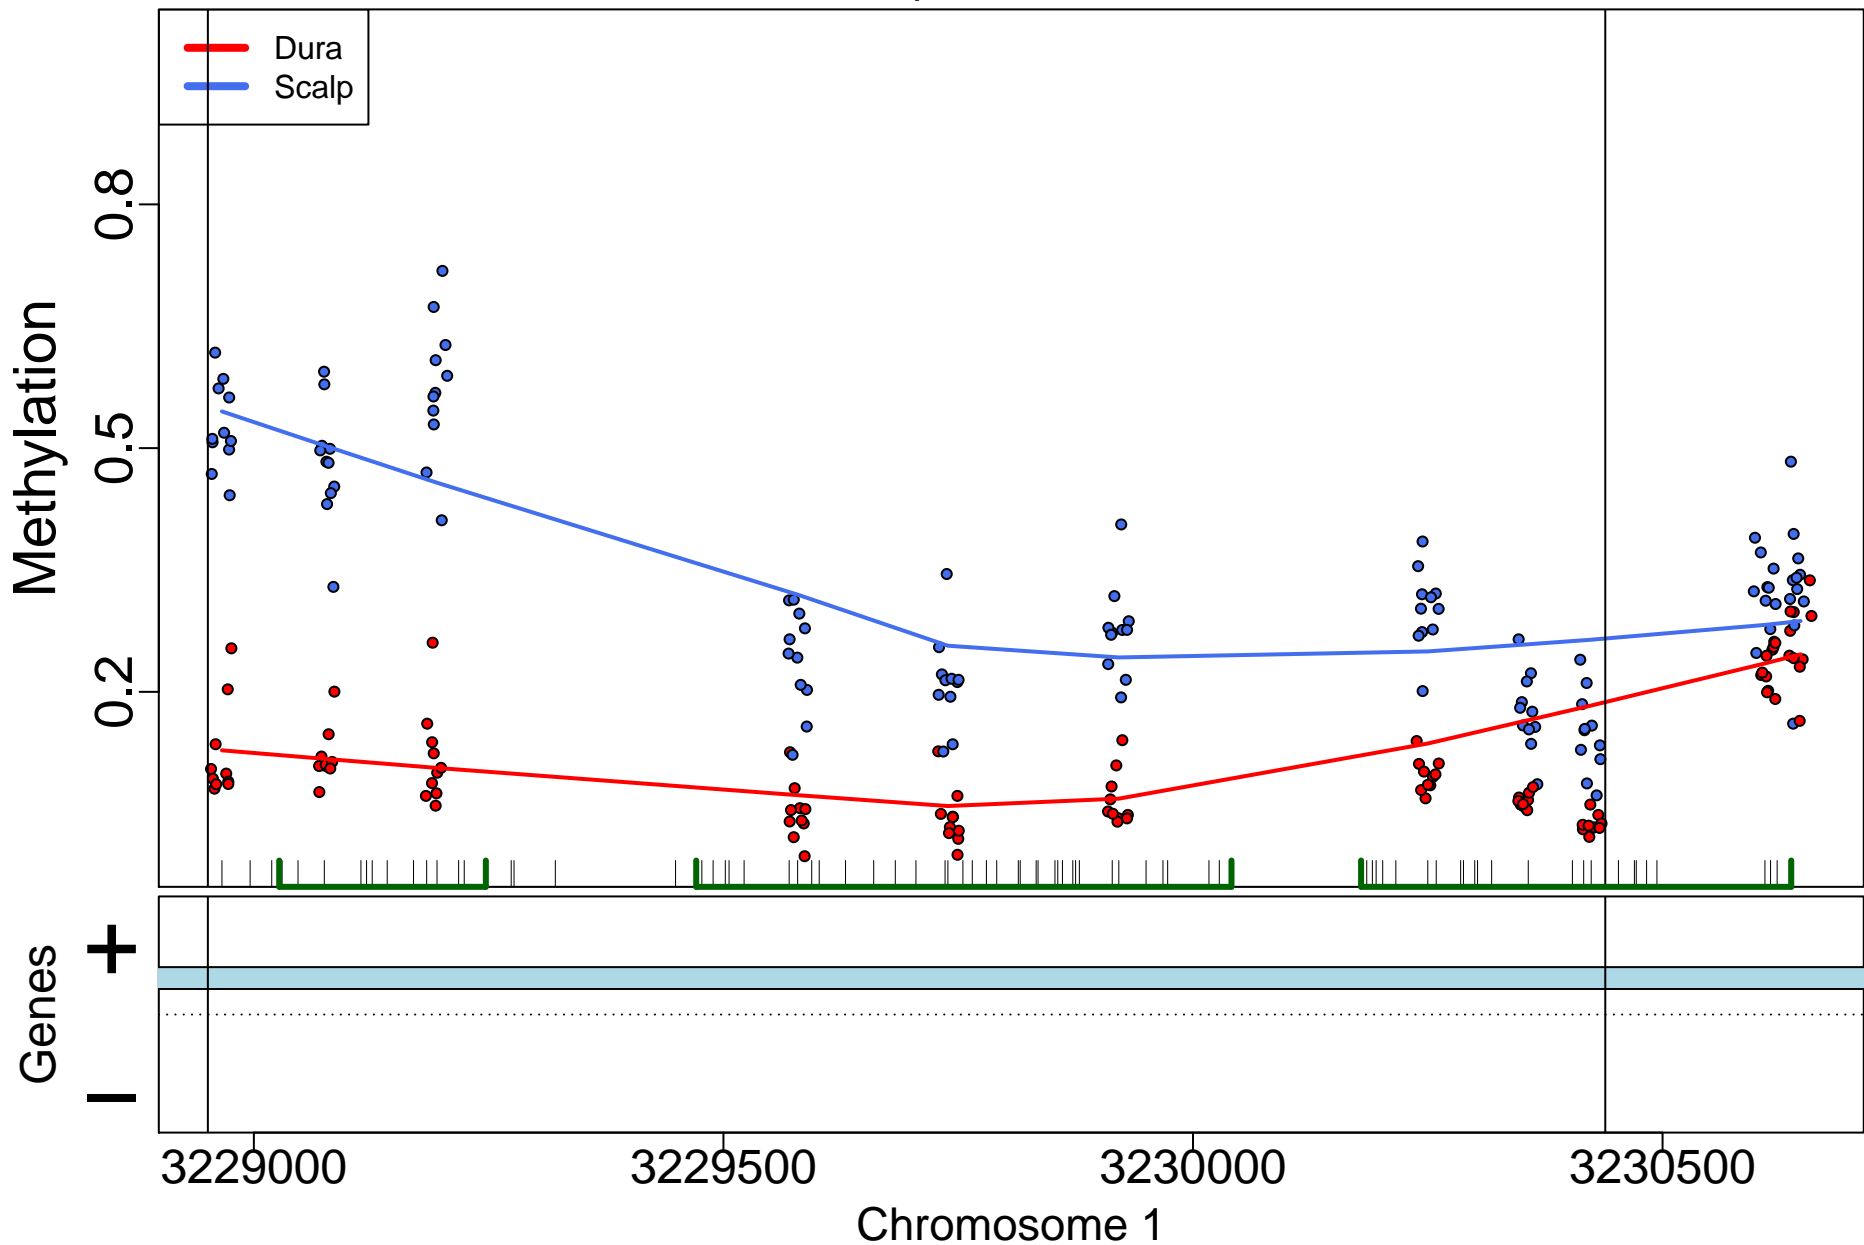

PRKAR1B; 0bp from tss:NA

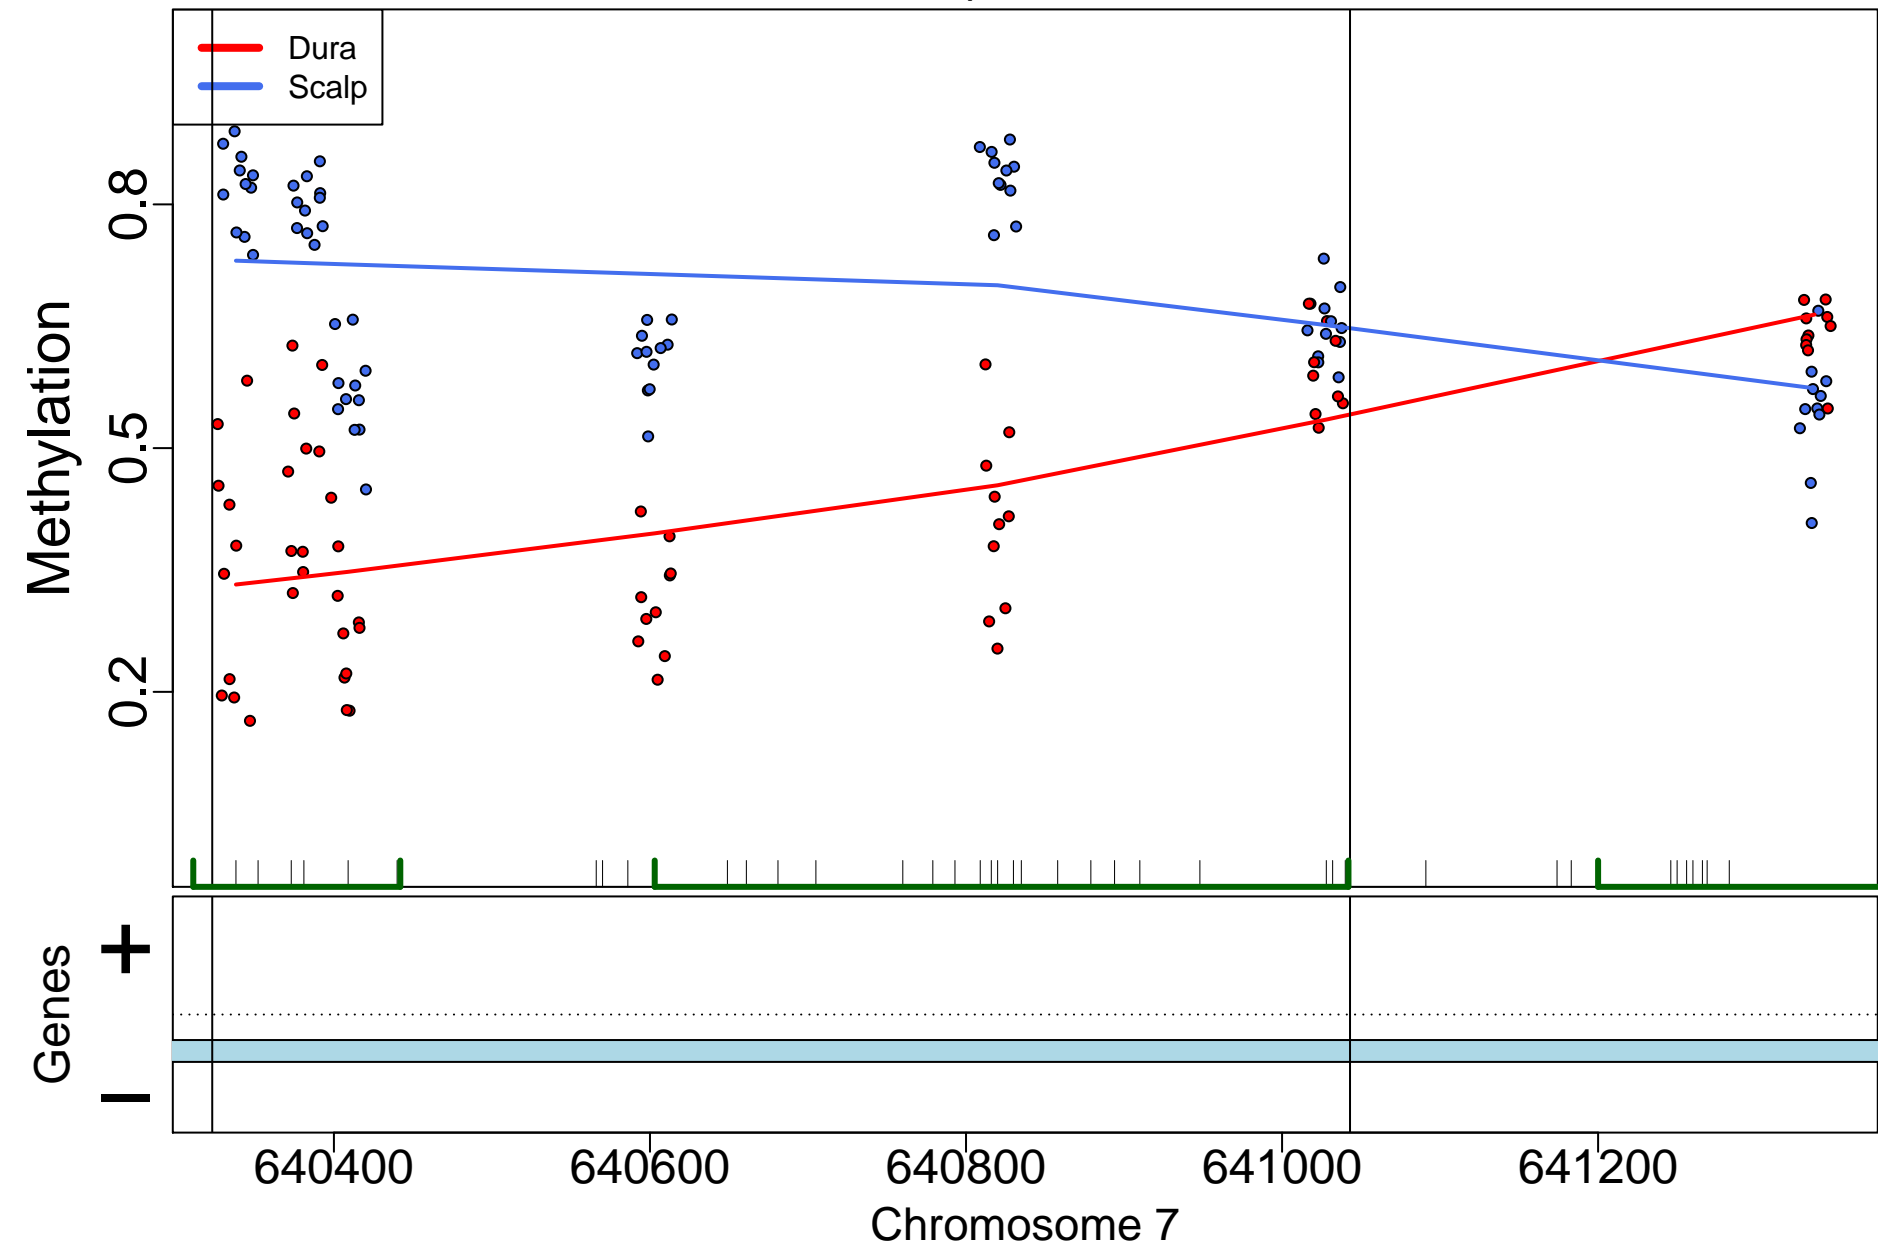

MLLT4-AS1; 0bp from tss:NA

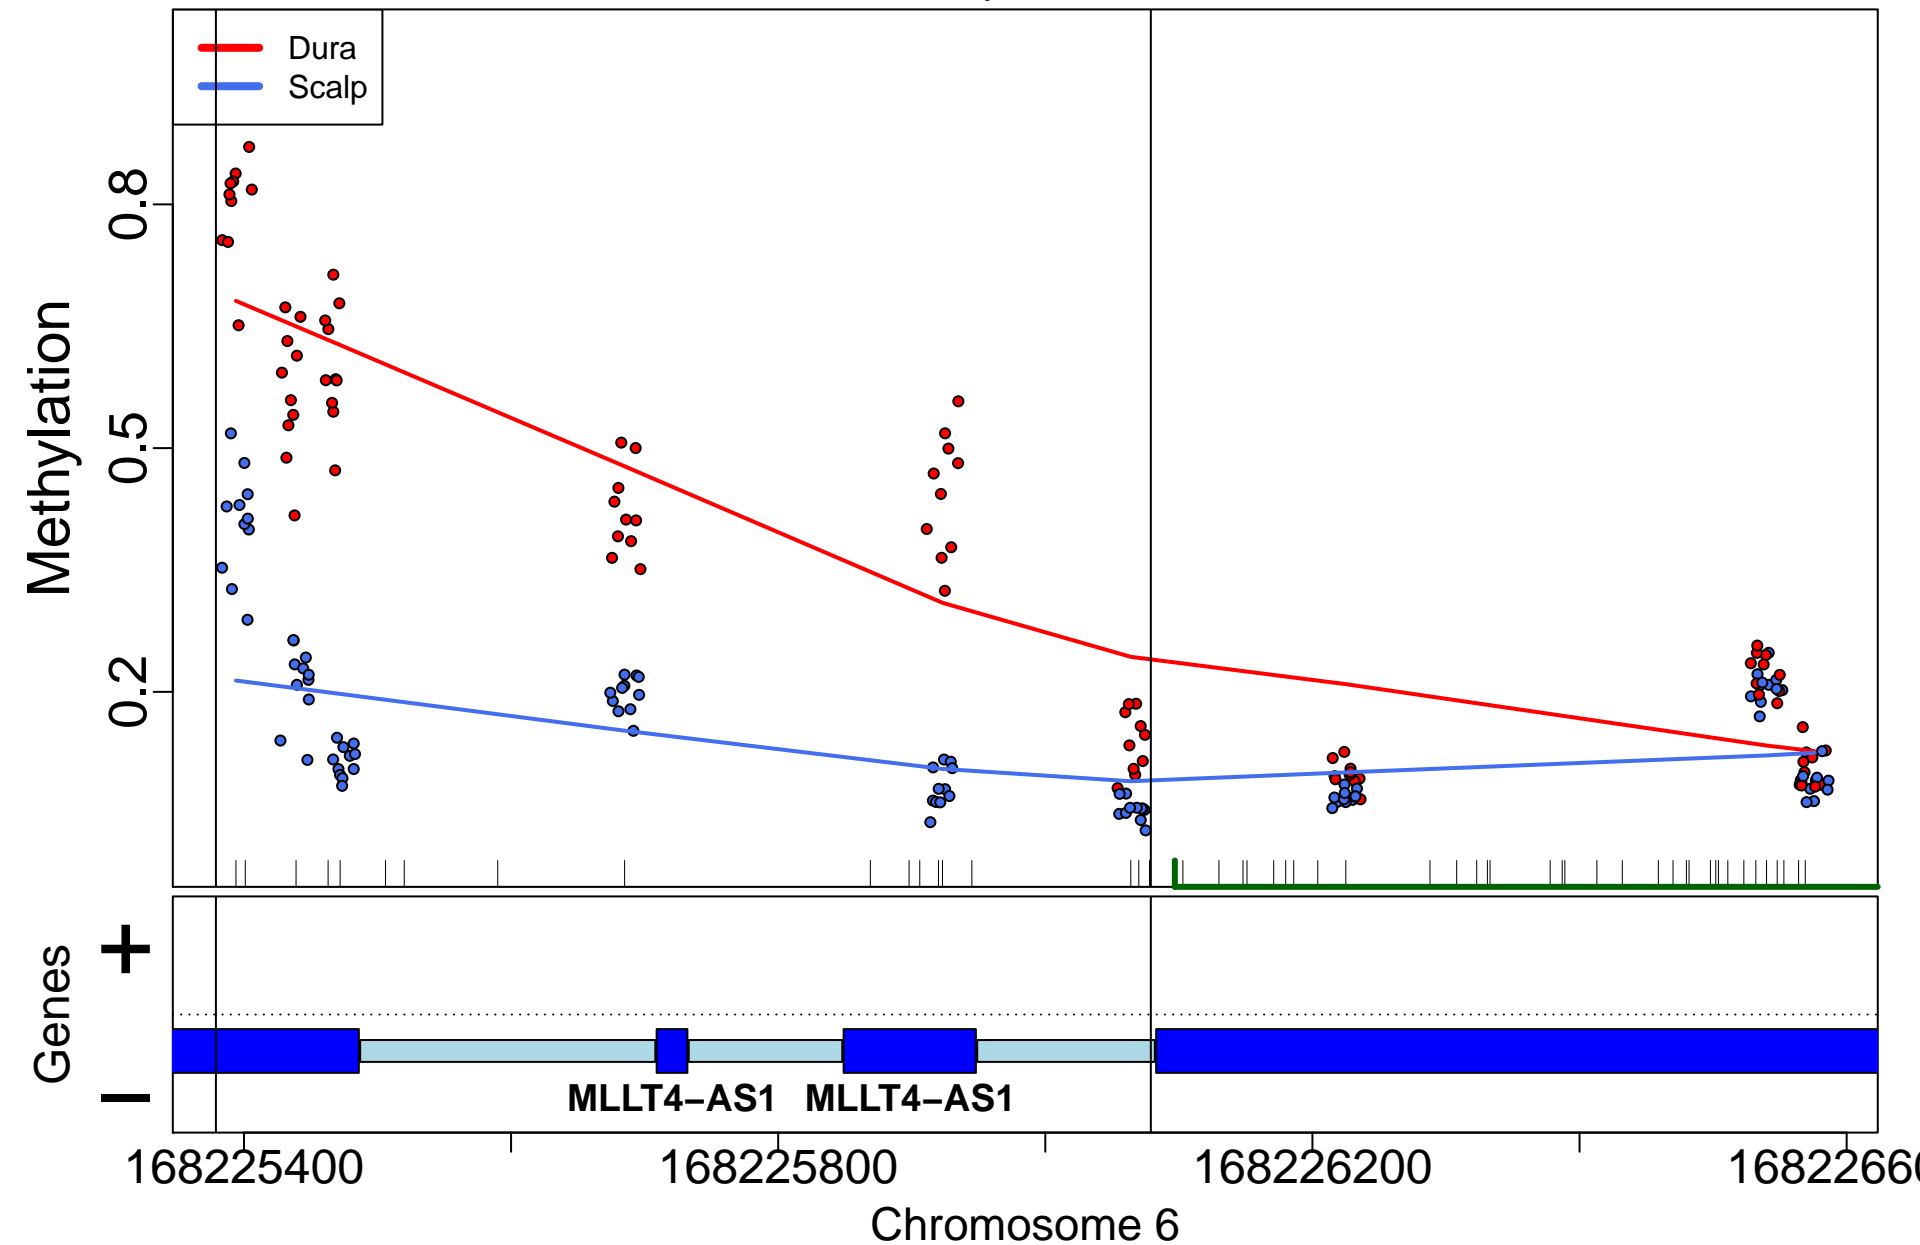

TOLLIP; 10258bp from tss:inside intron

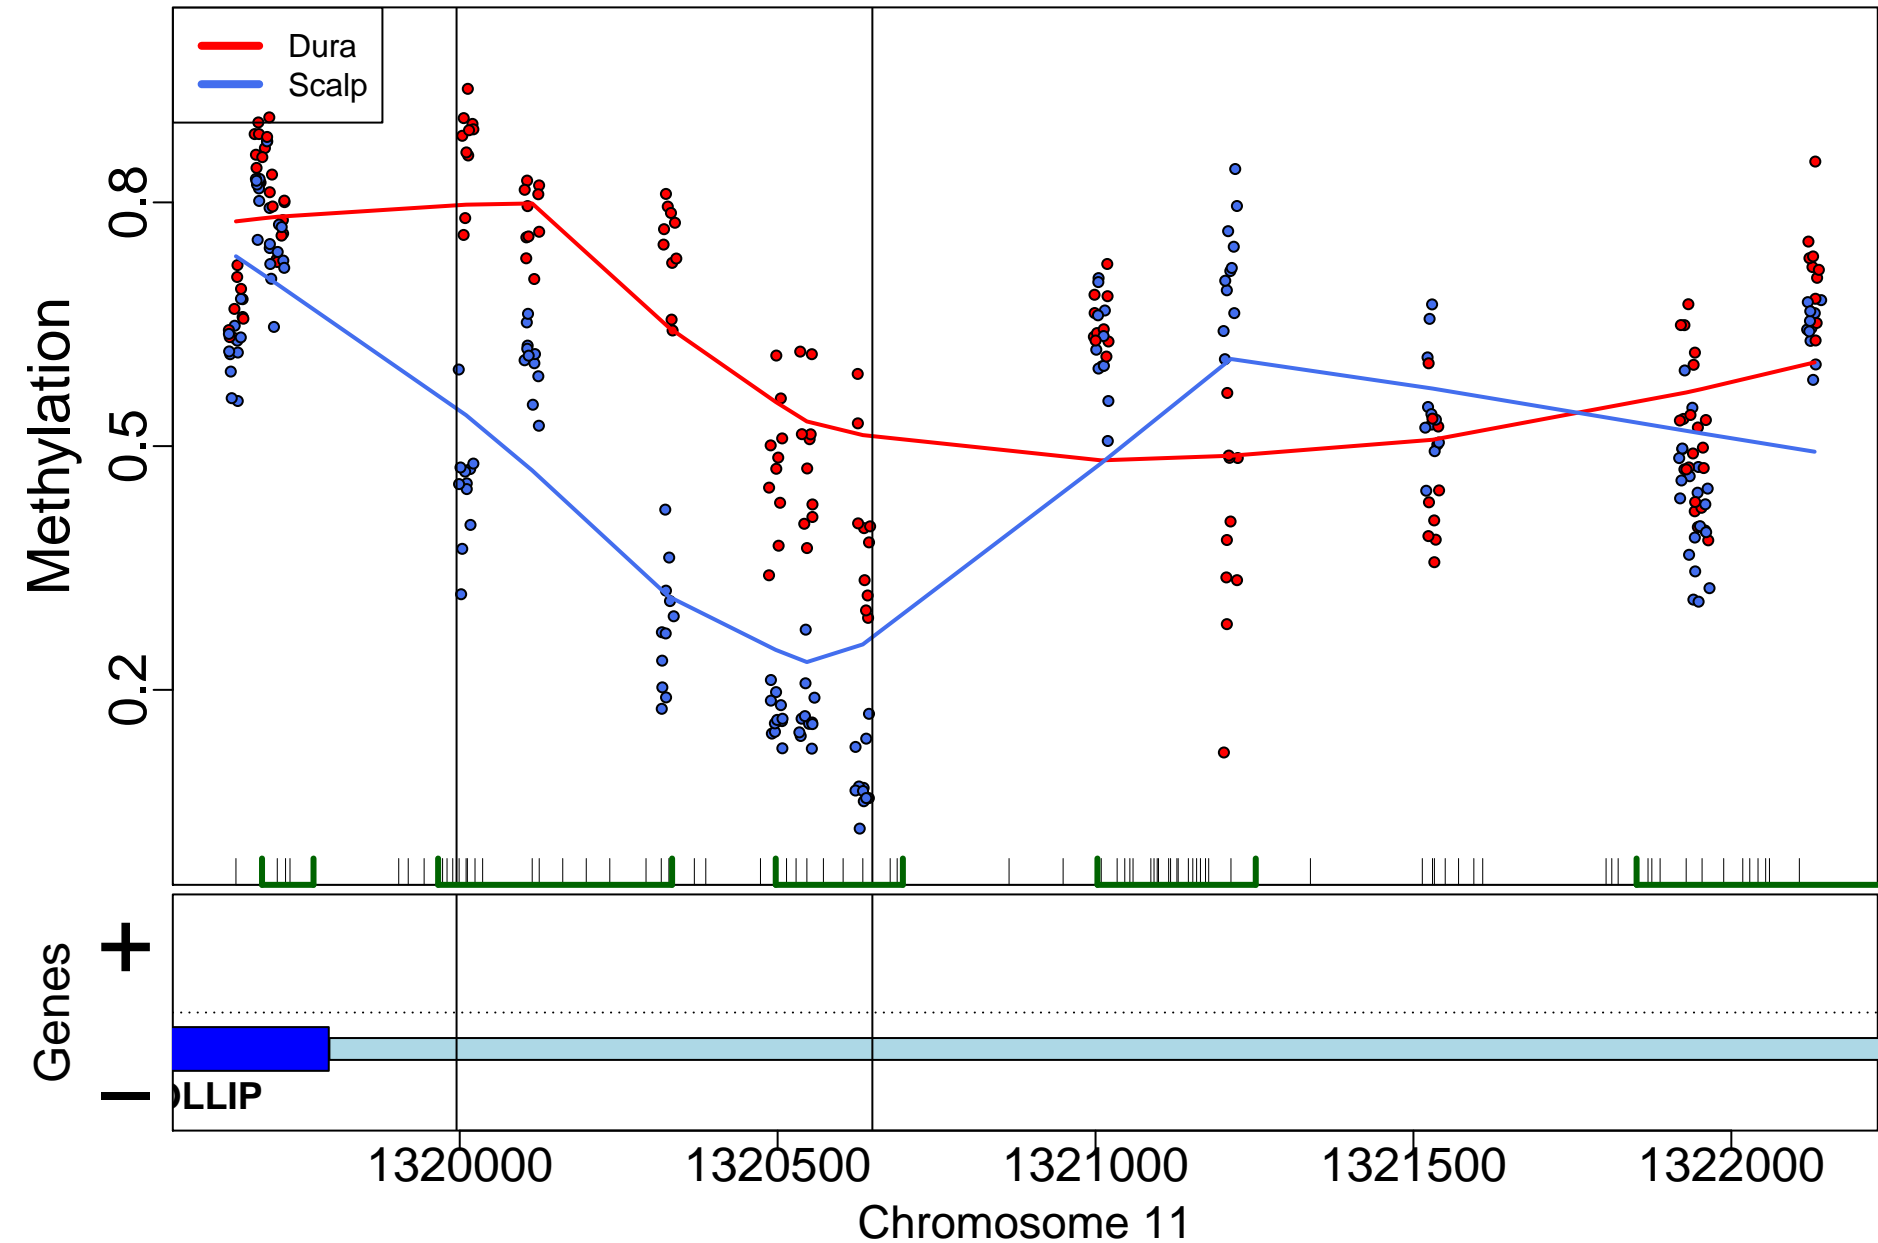

TNFAIP2; 0bp from tss:overlaps 5'

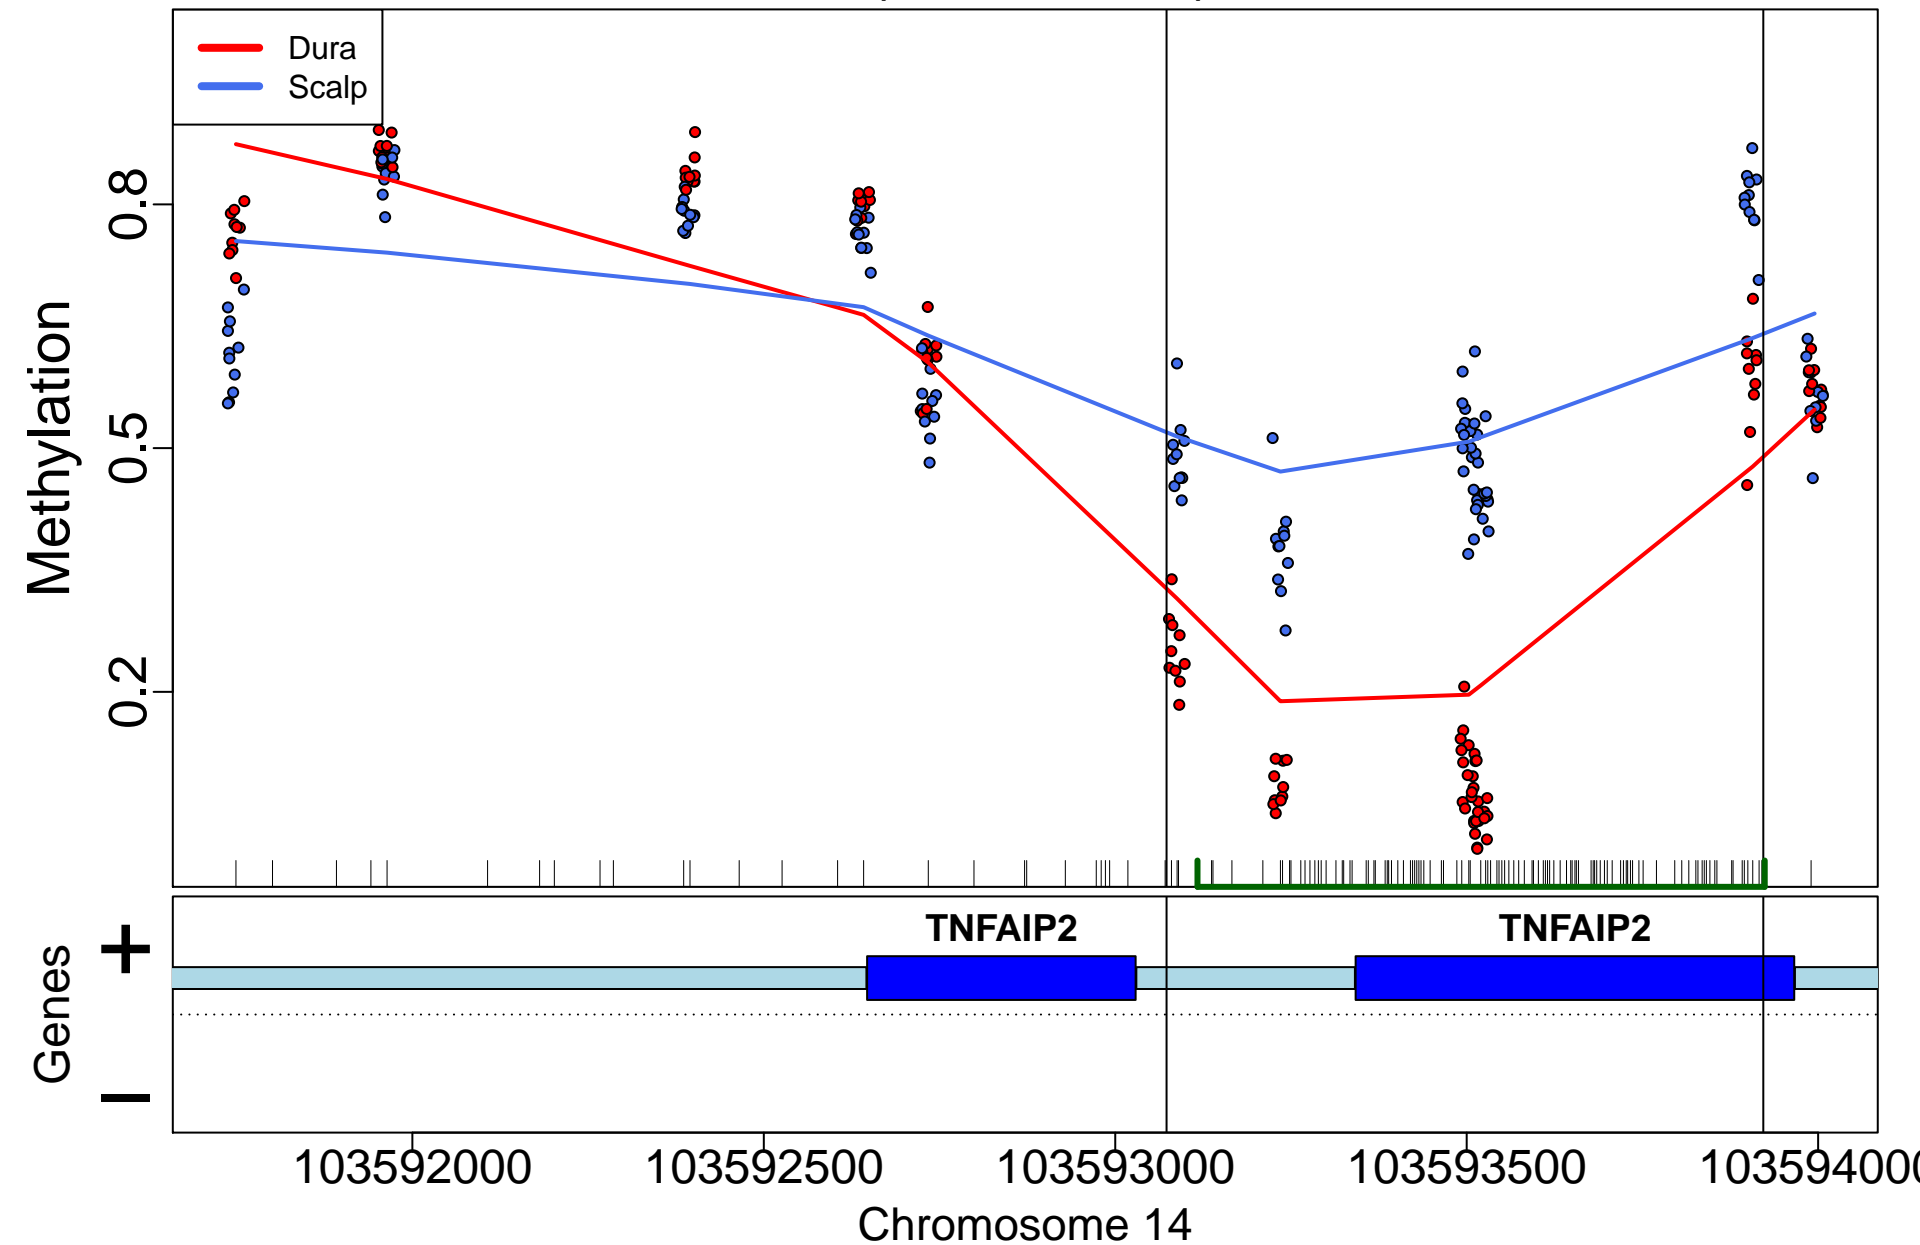

OSR2; 2799bp from tss:inside intron

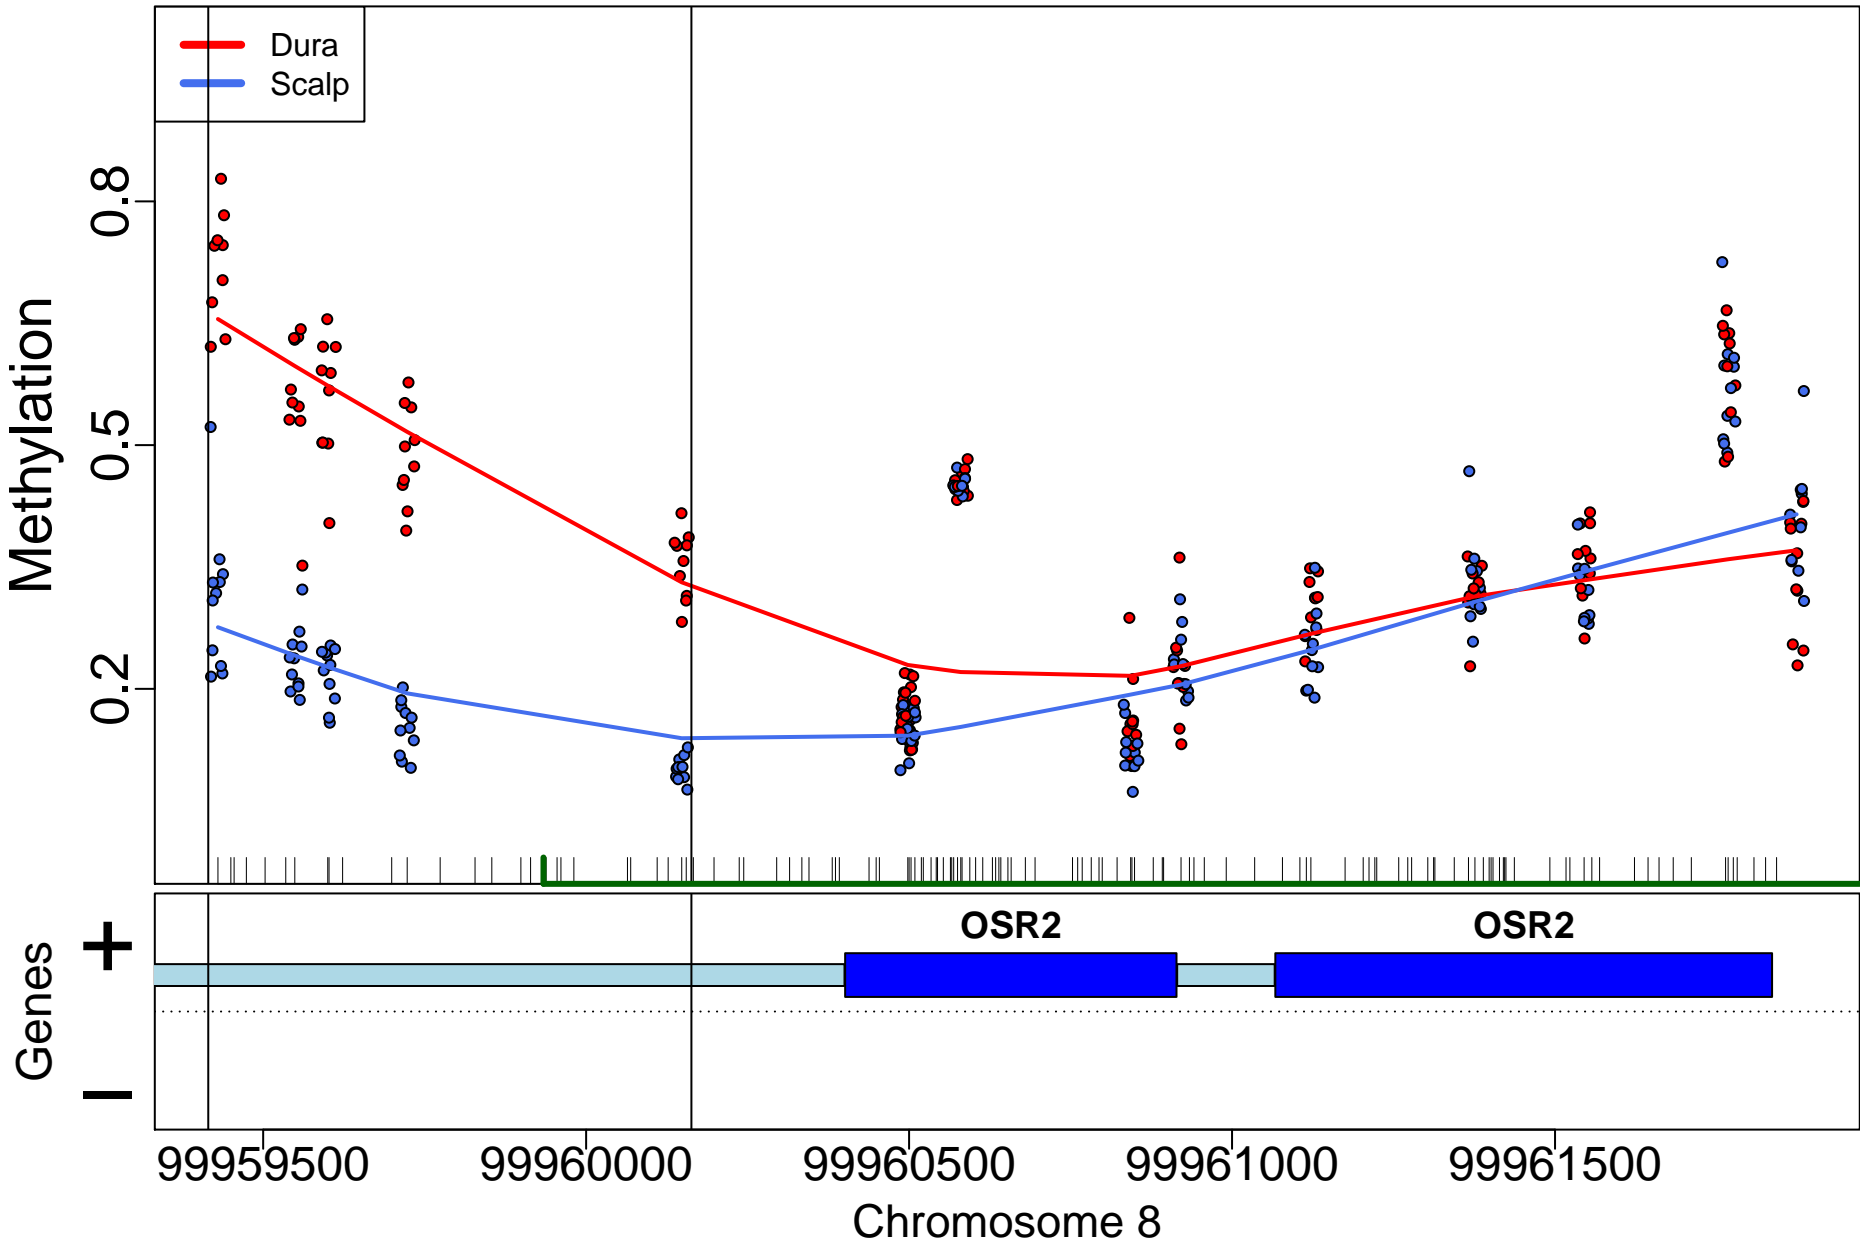



RPTOR; 235131bp from tss:inside intron

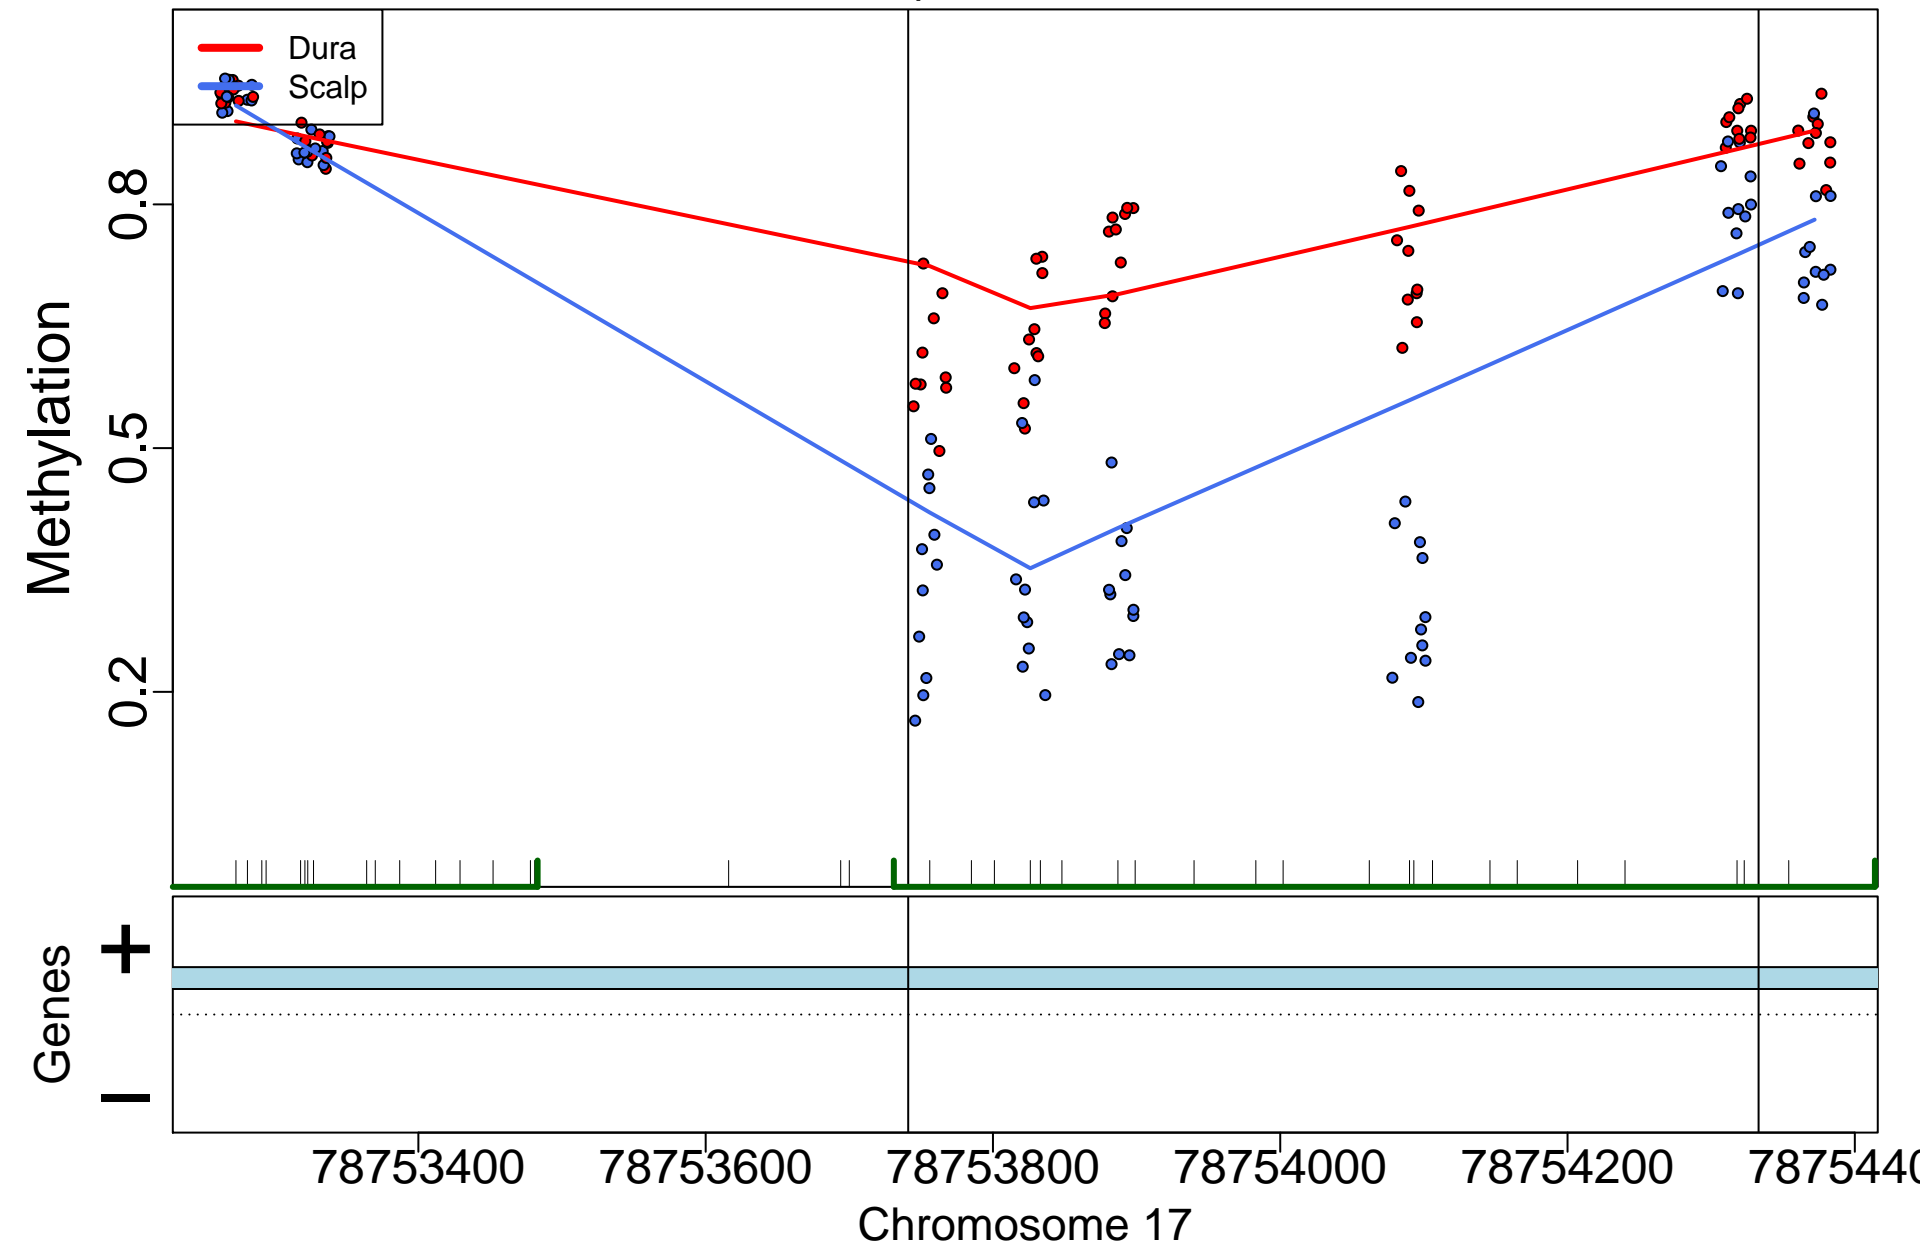

ZFH3; 271181bp from tss:inside exon

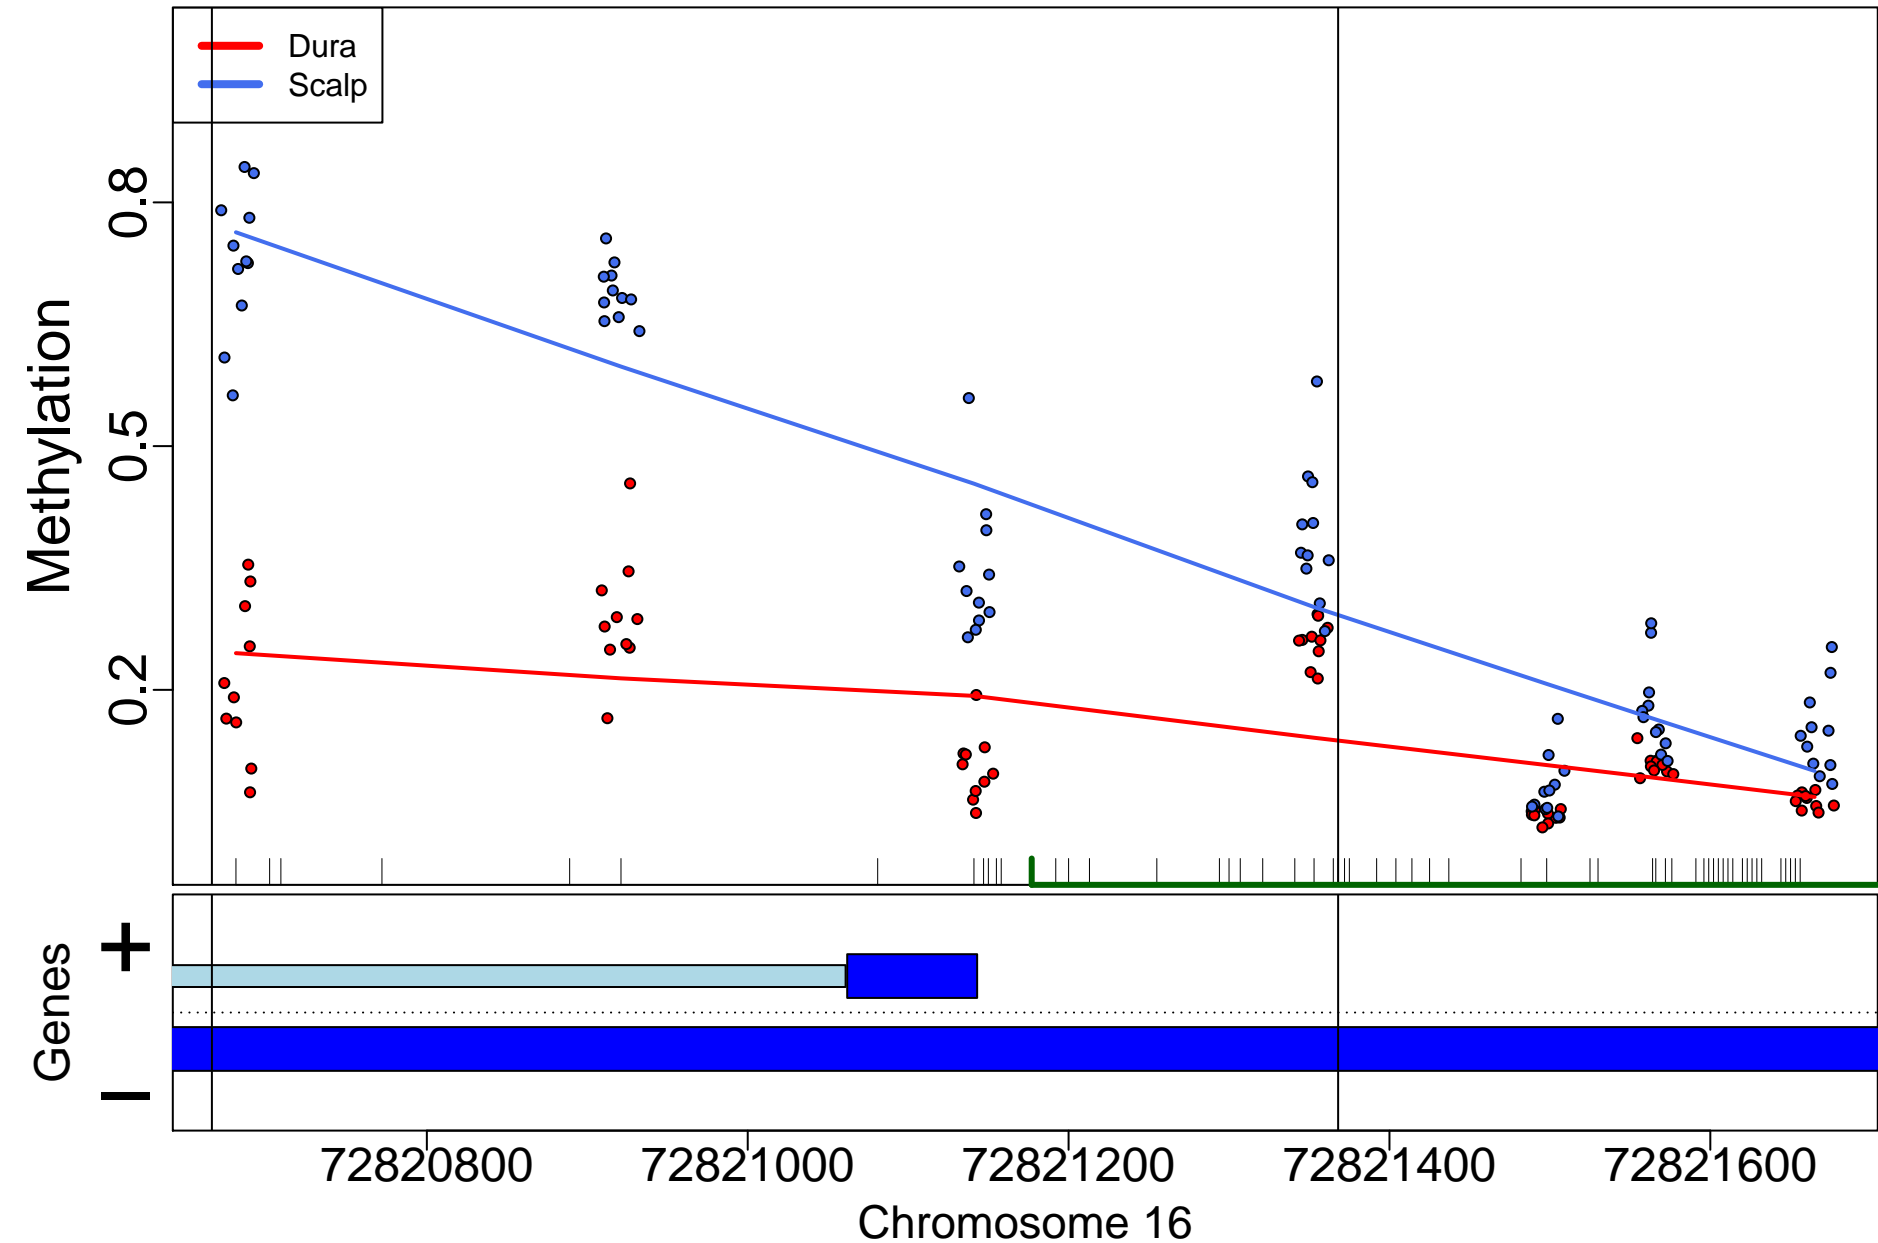

FOXD2; 0bp from tss:overlaps 5'

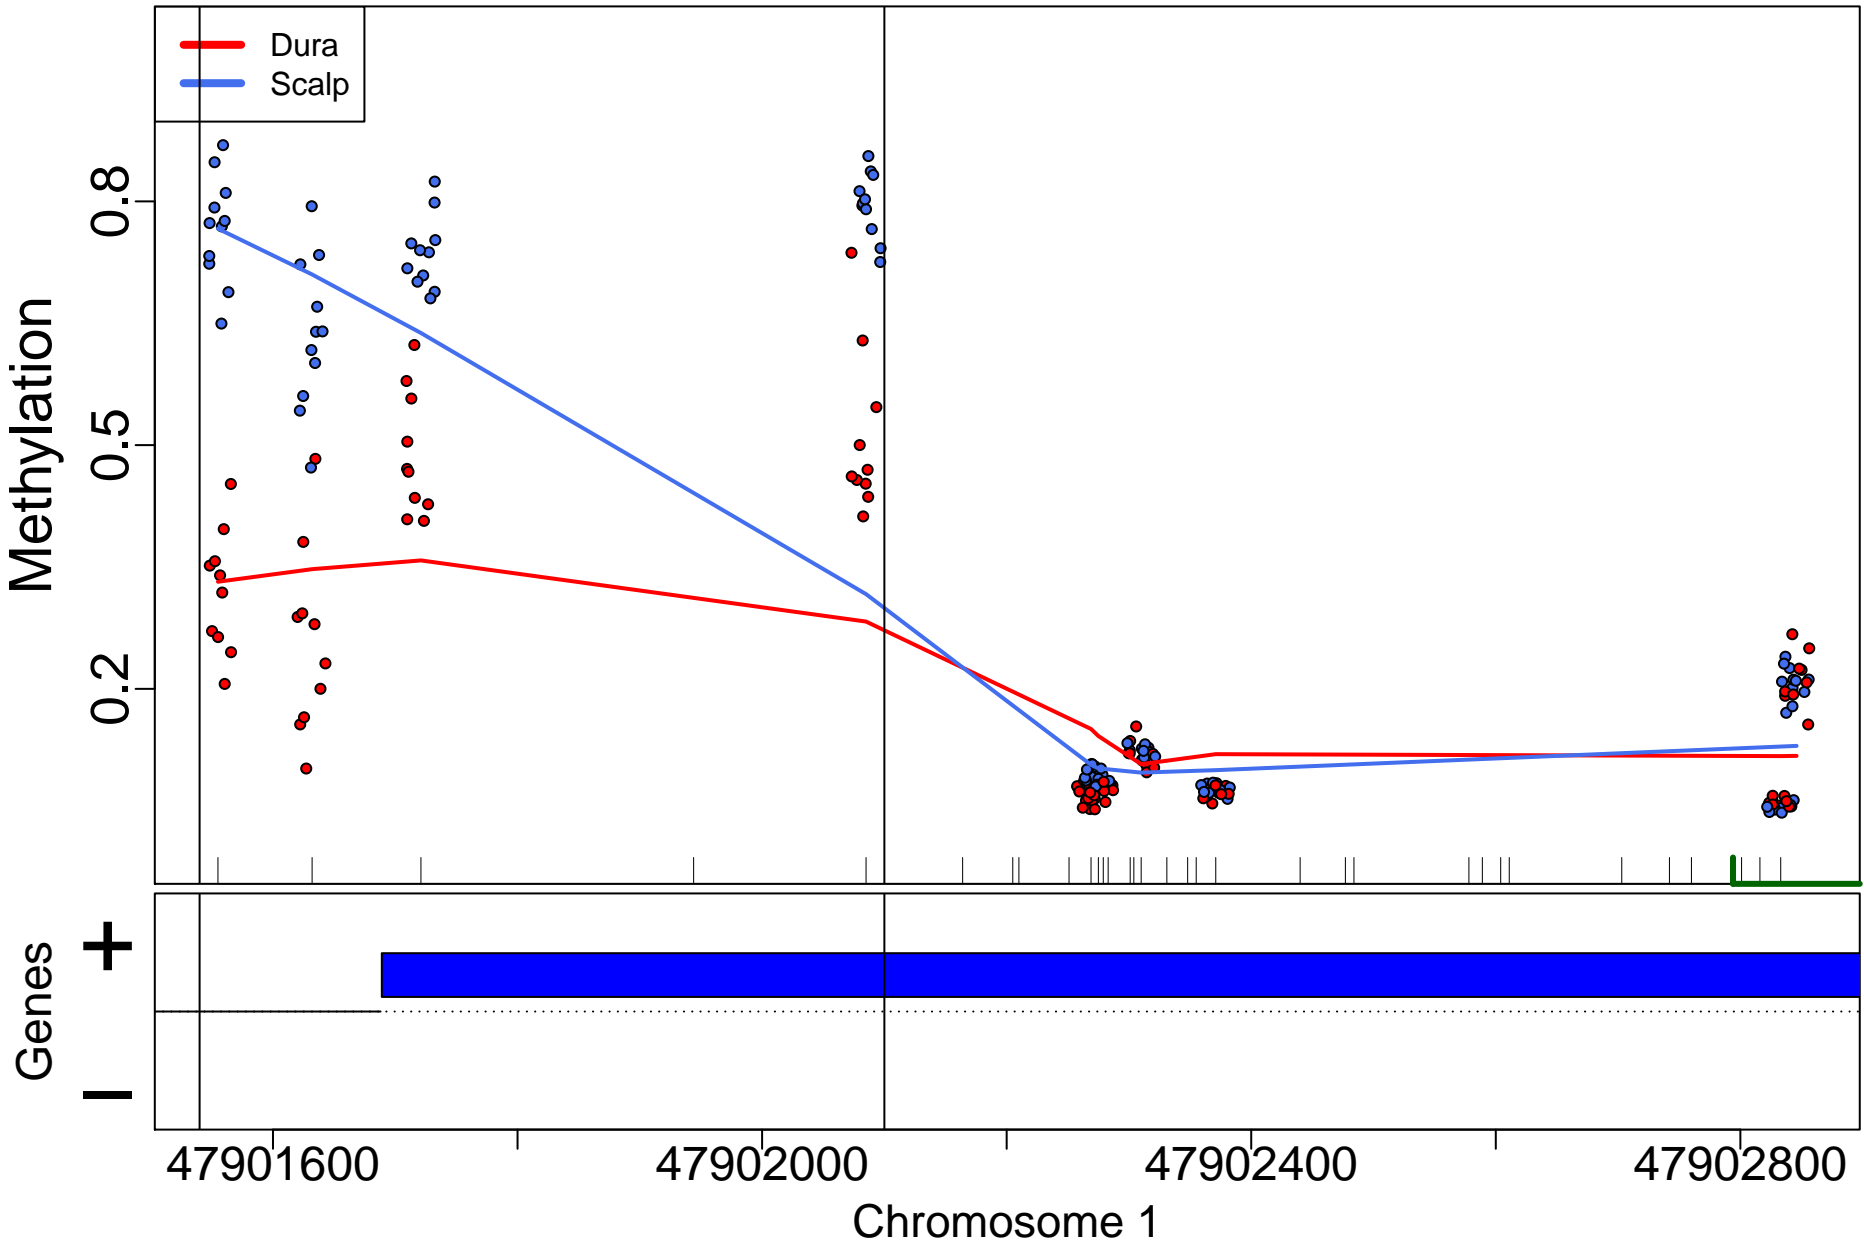

NAV2; 0bp from tss:overlaps 5'

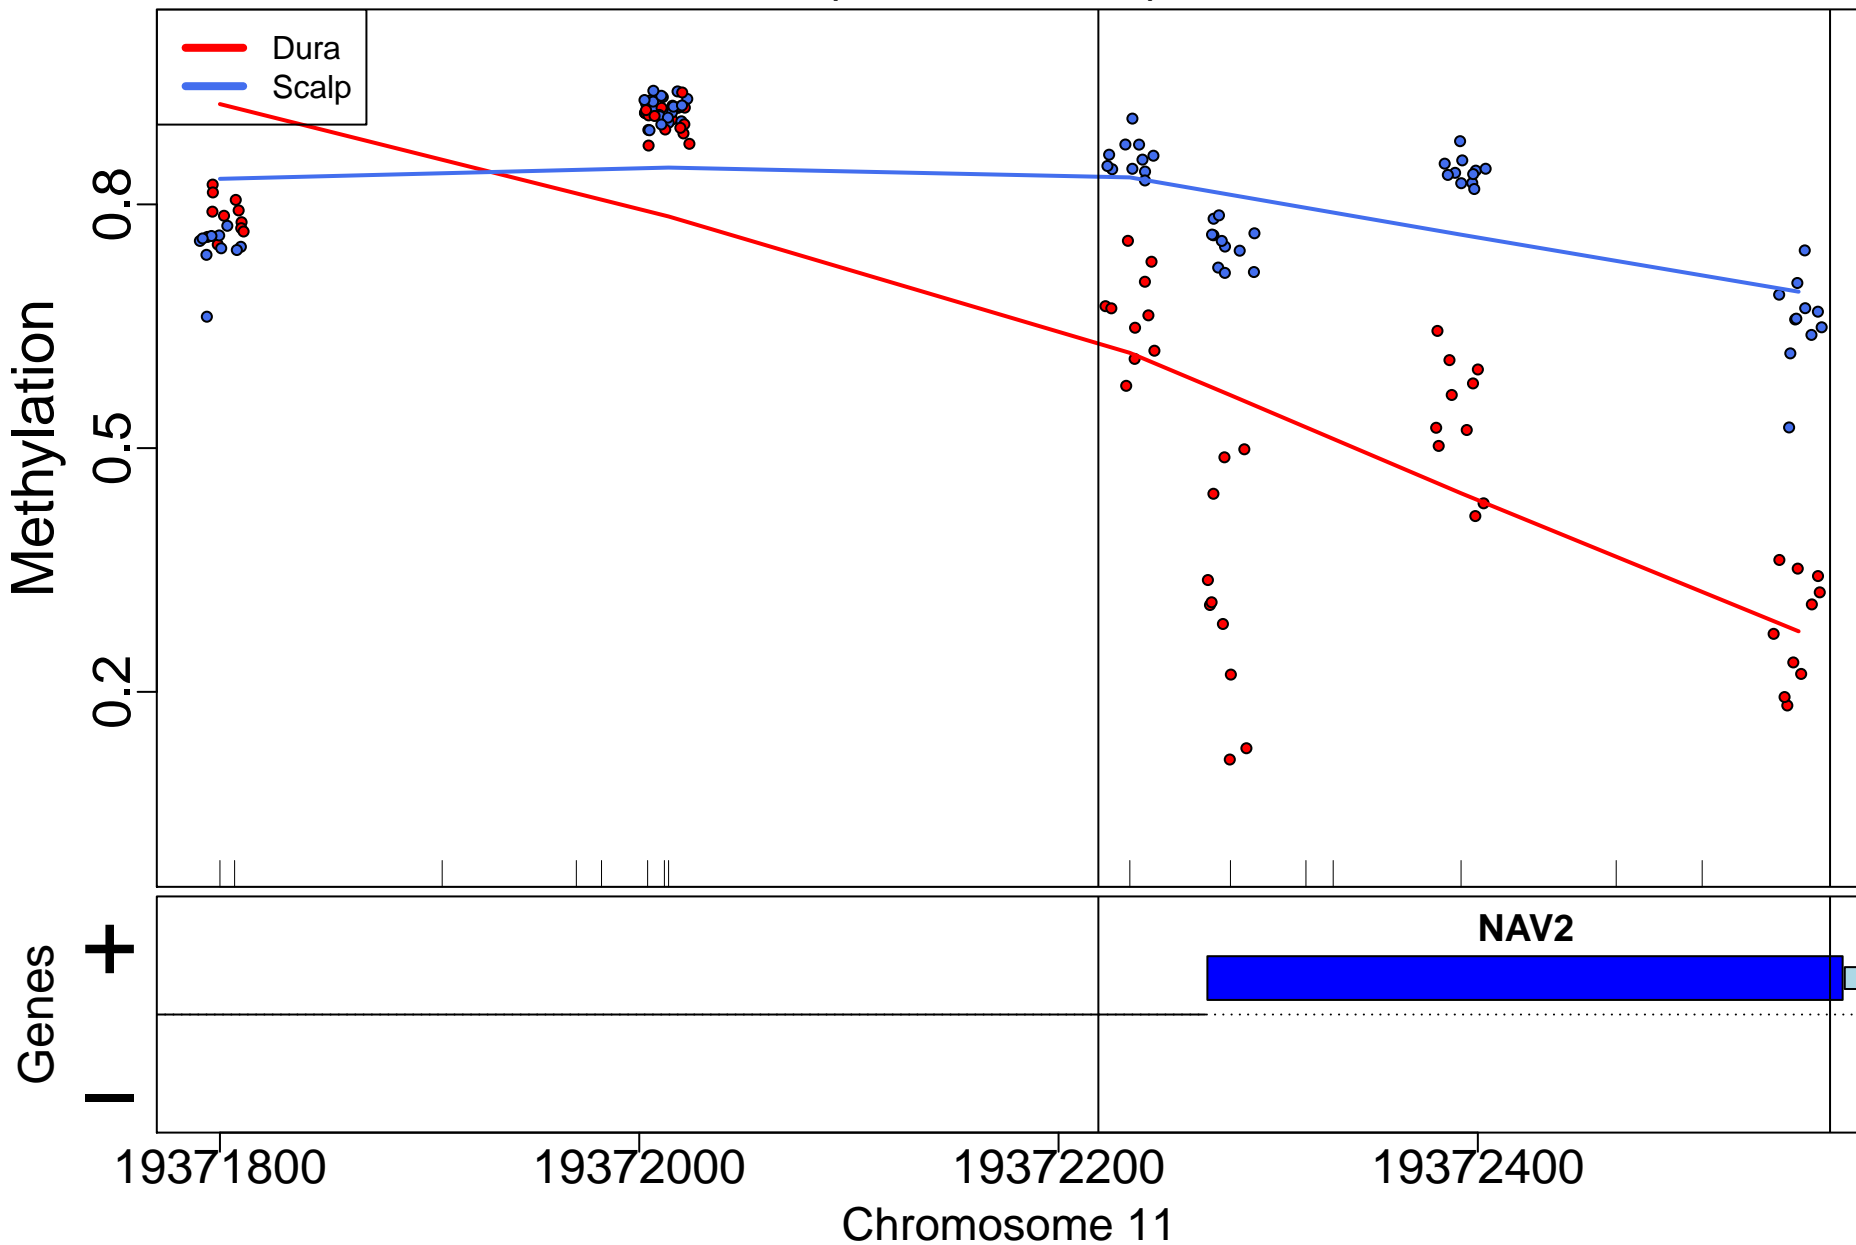

LRRC8C; 613bp from tss:inside intron

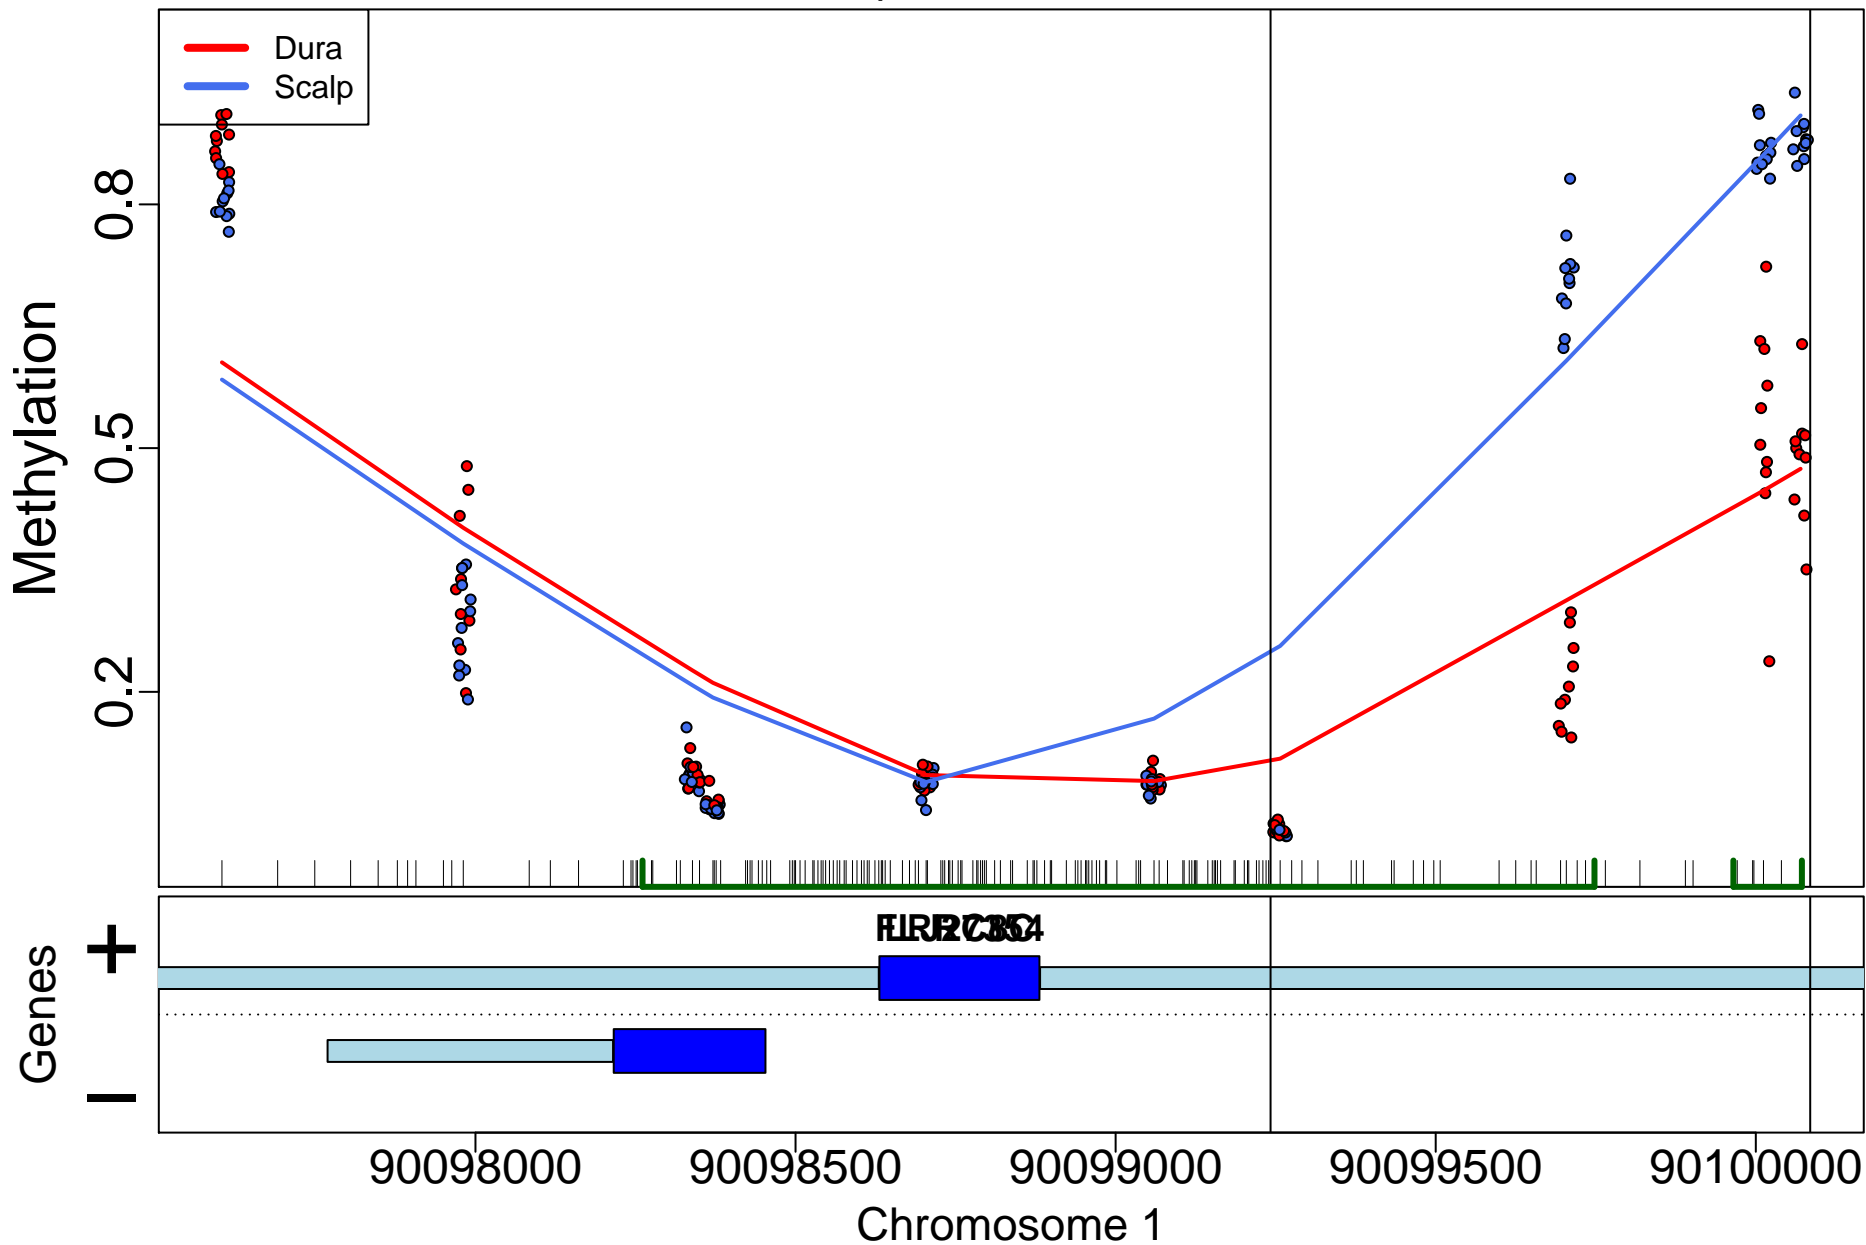

ACTRT2; 89936bp from tss:upstream

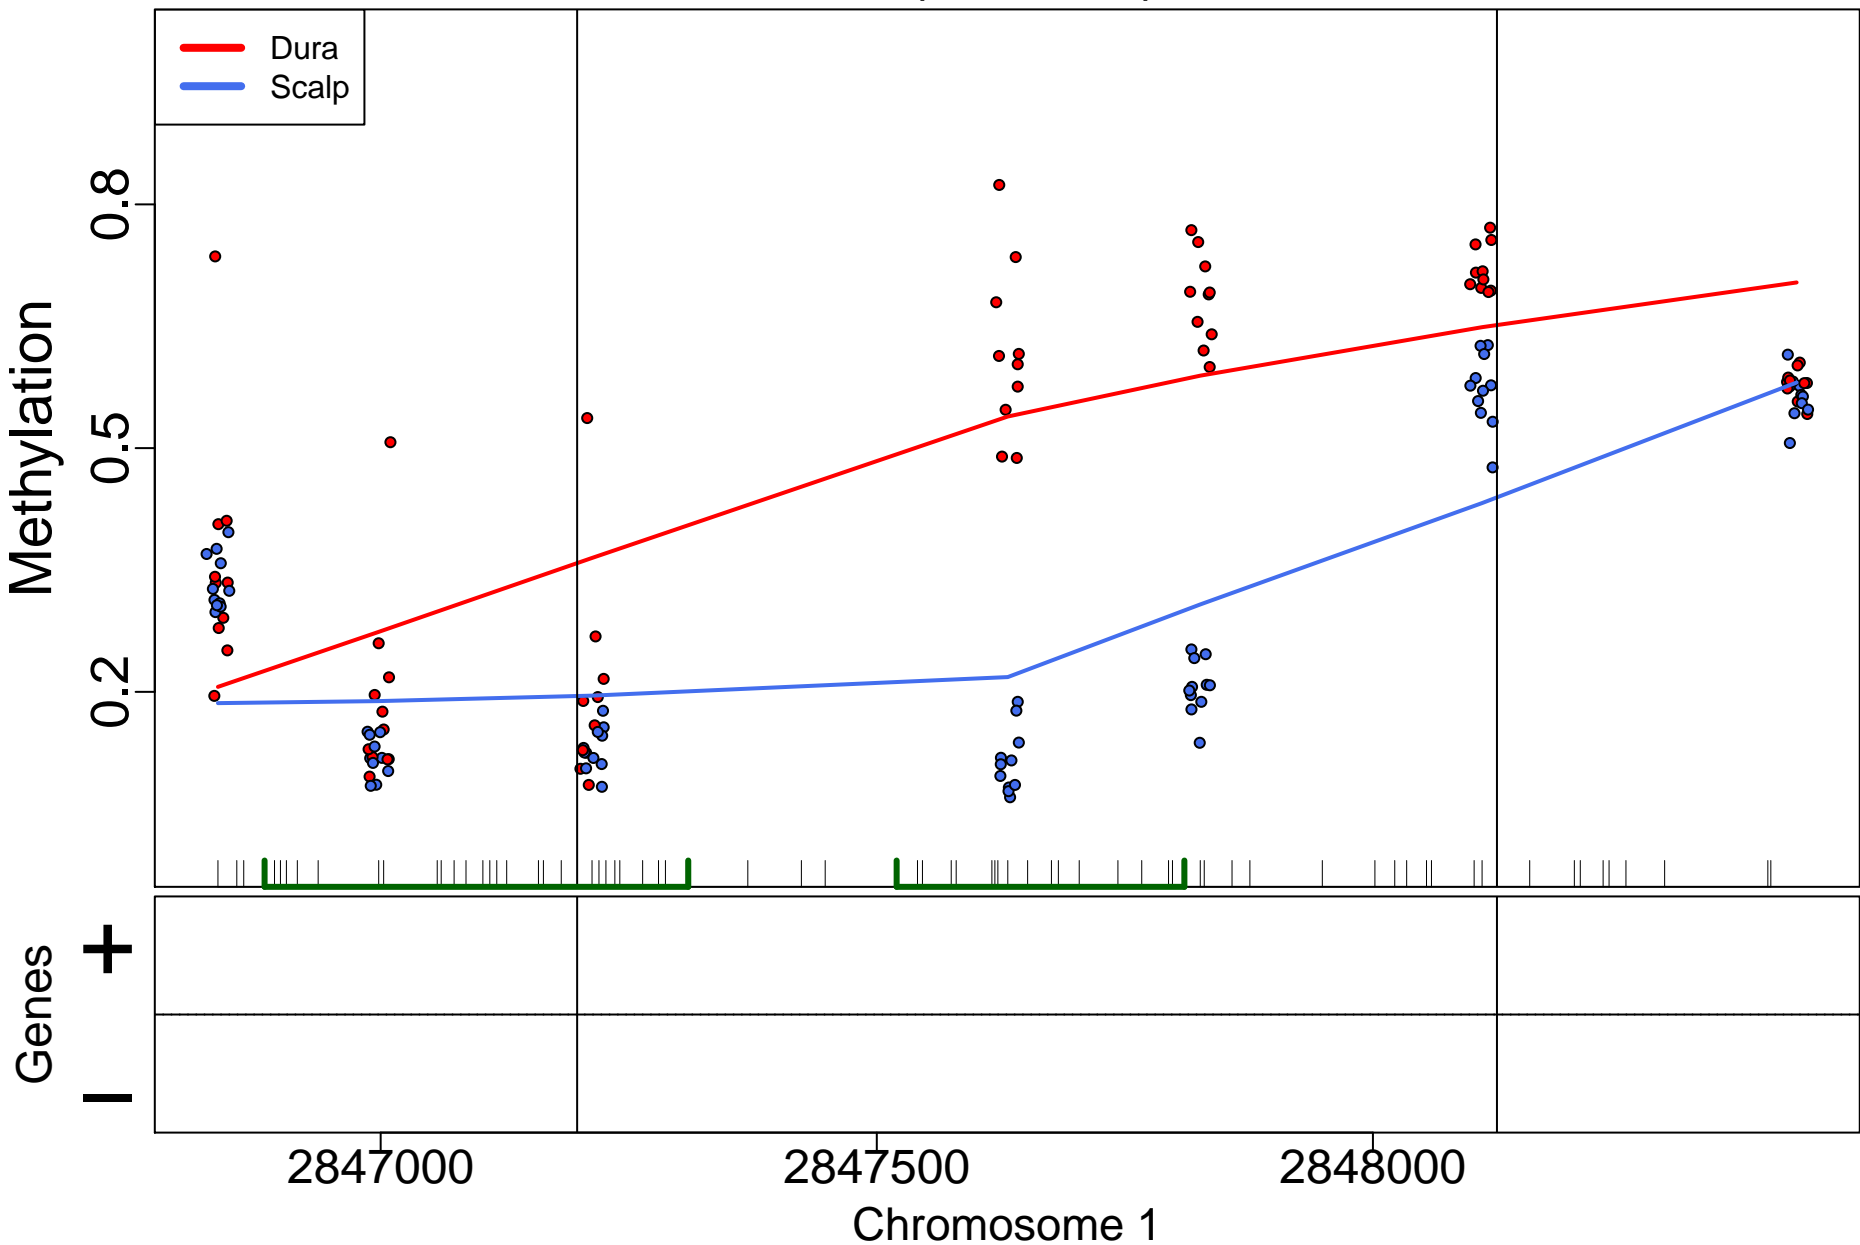

FLJ33360; 612bp from tss:promoter

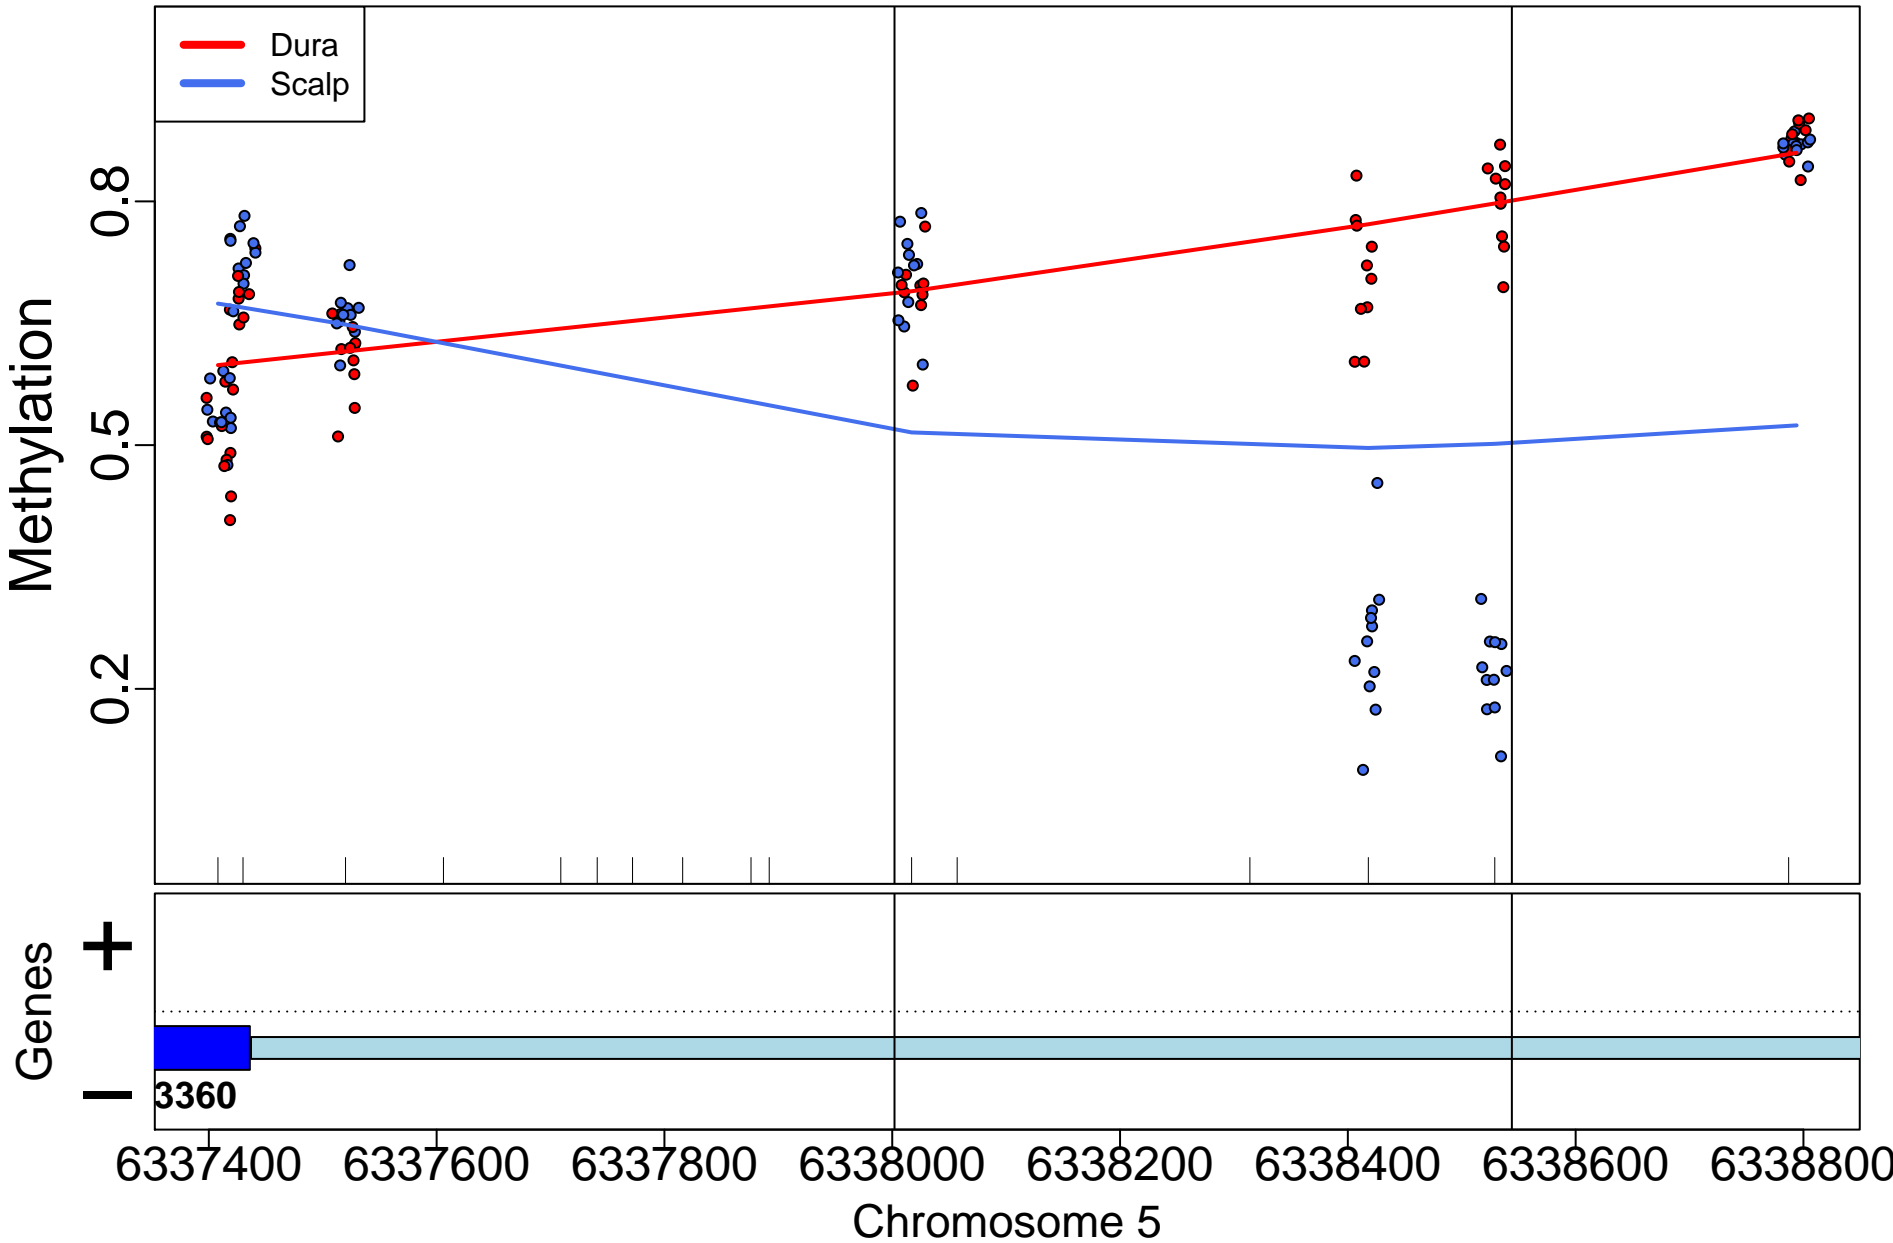

# MDFI; 411bp from tss:promoter

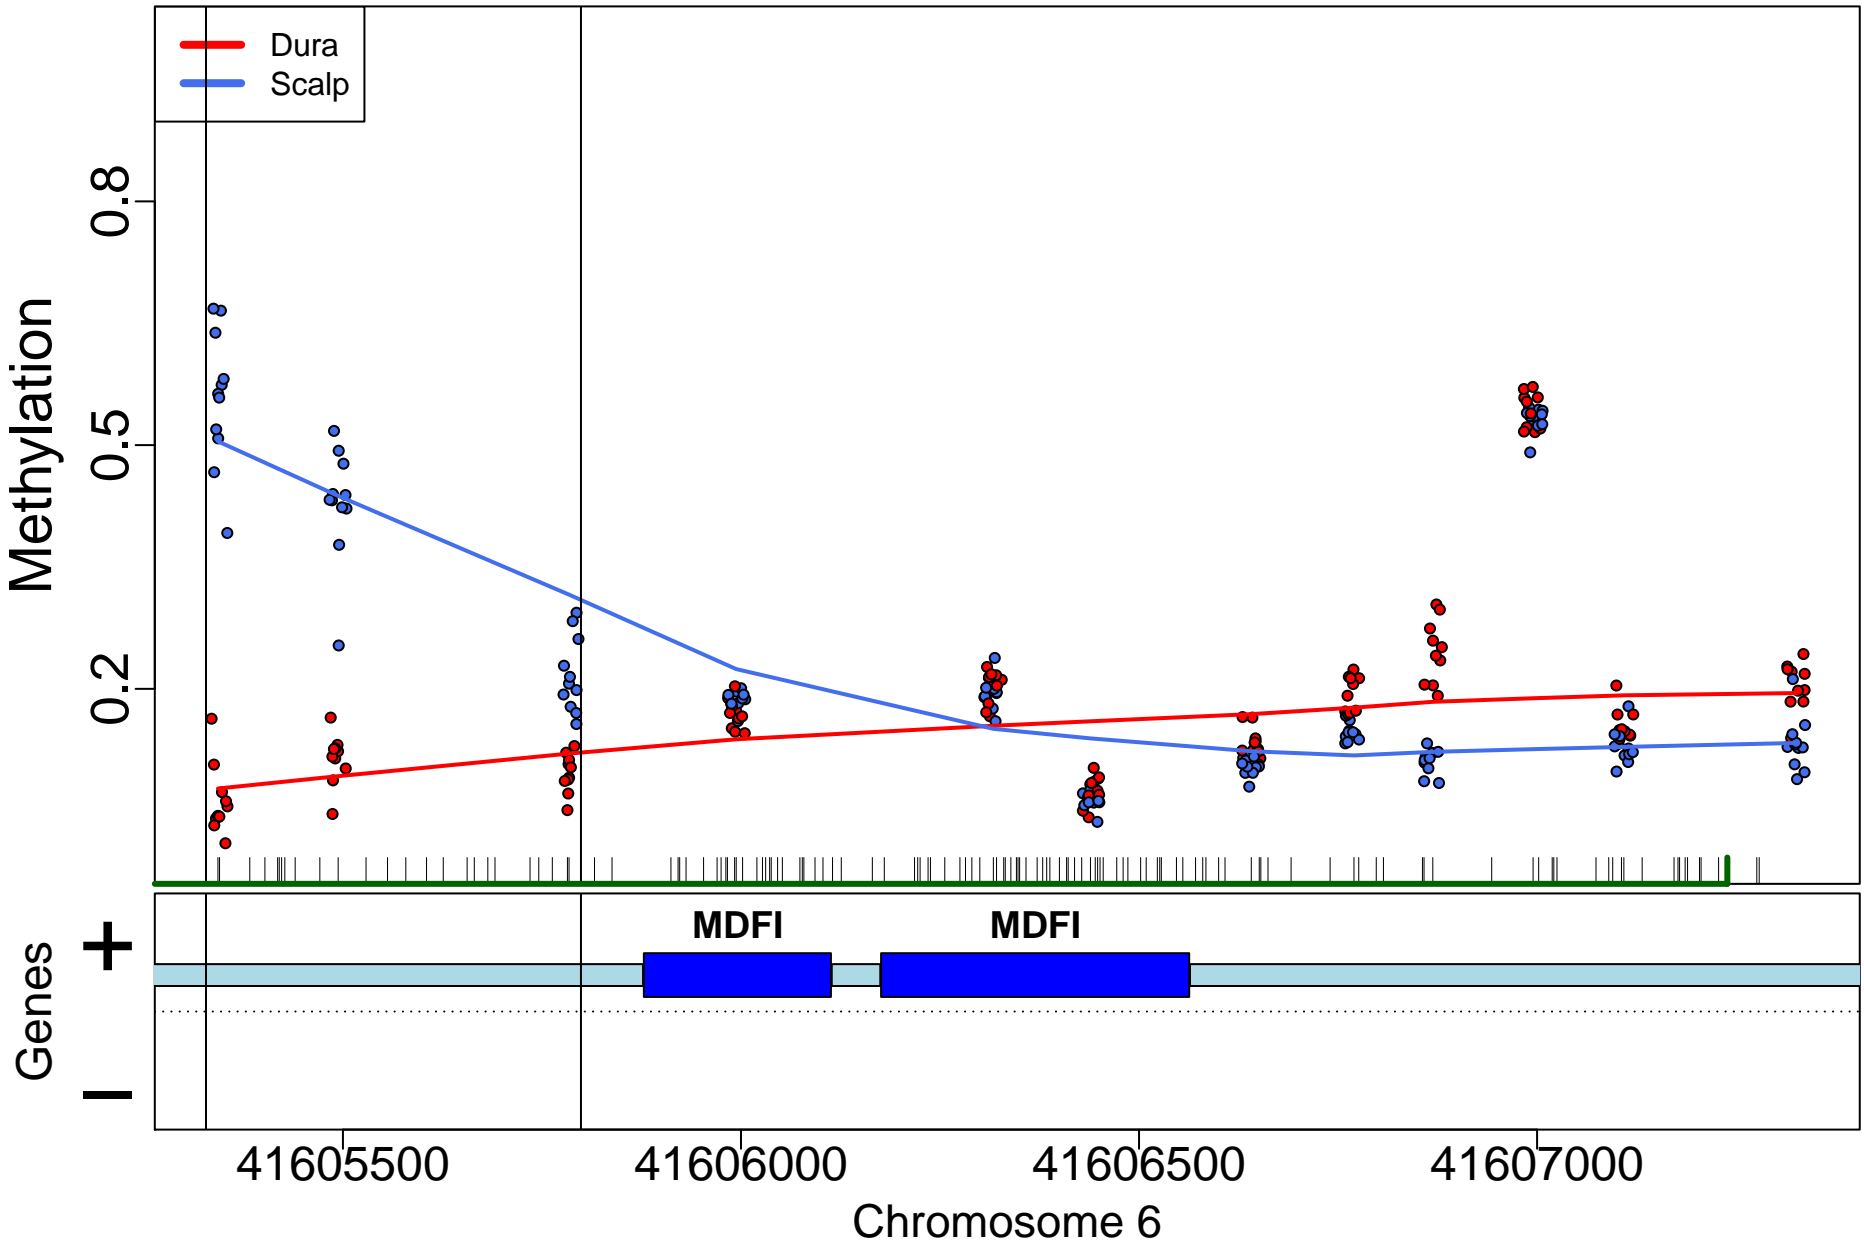



C15orf56; 683bp from tss:inside exon

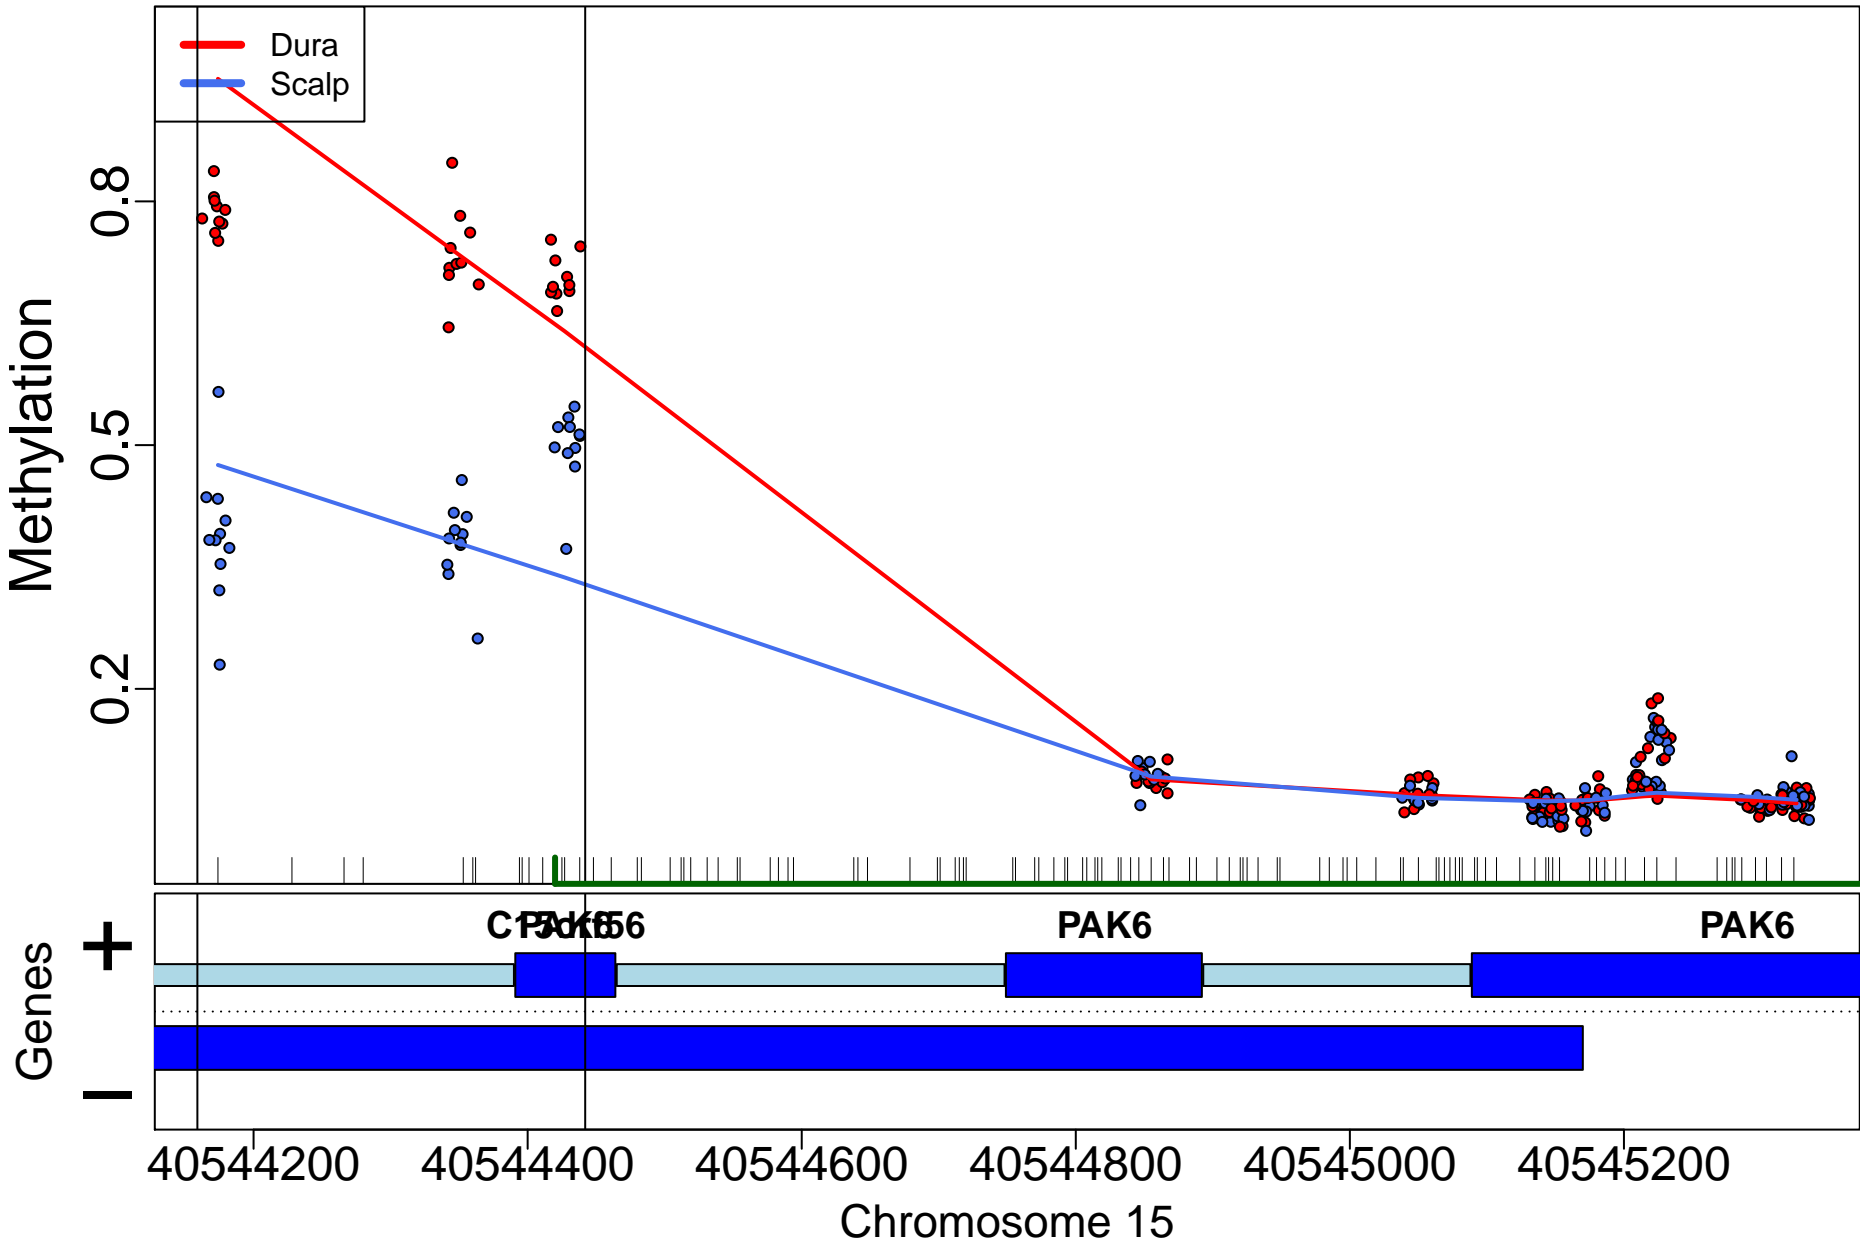

GNA12; 83168bp from tss:inside intron

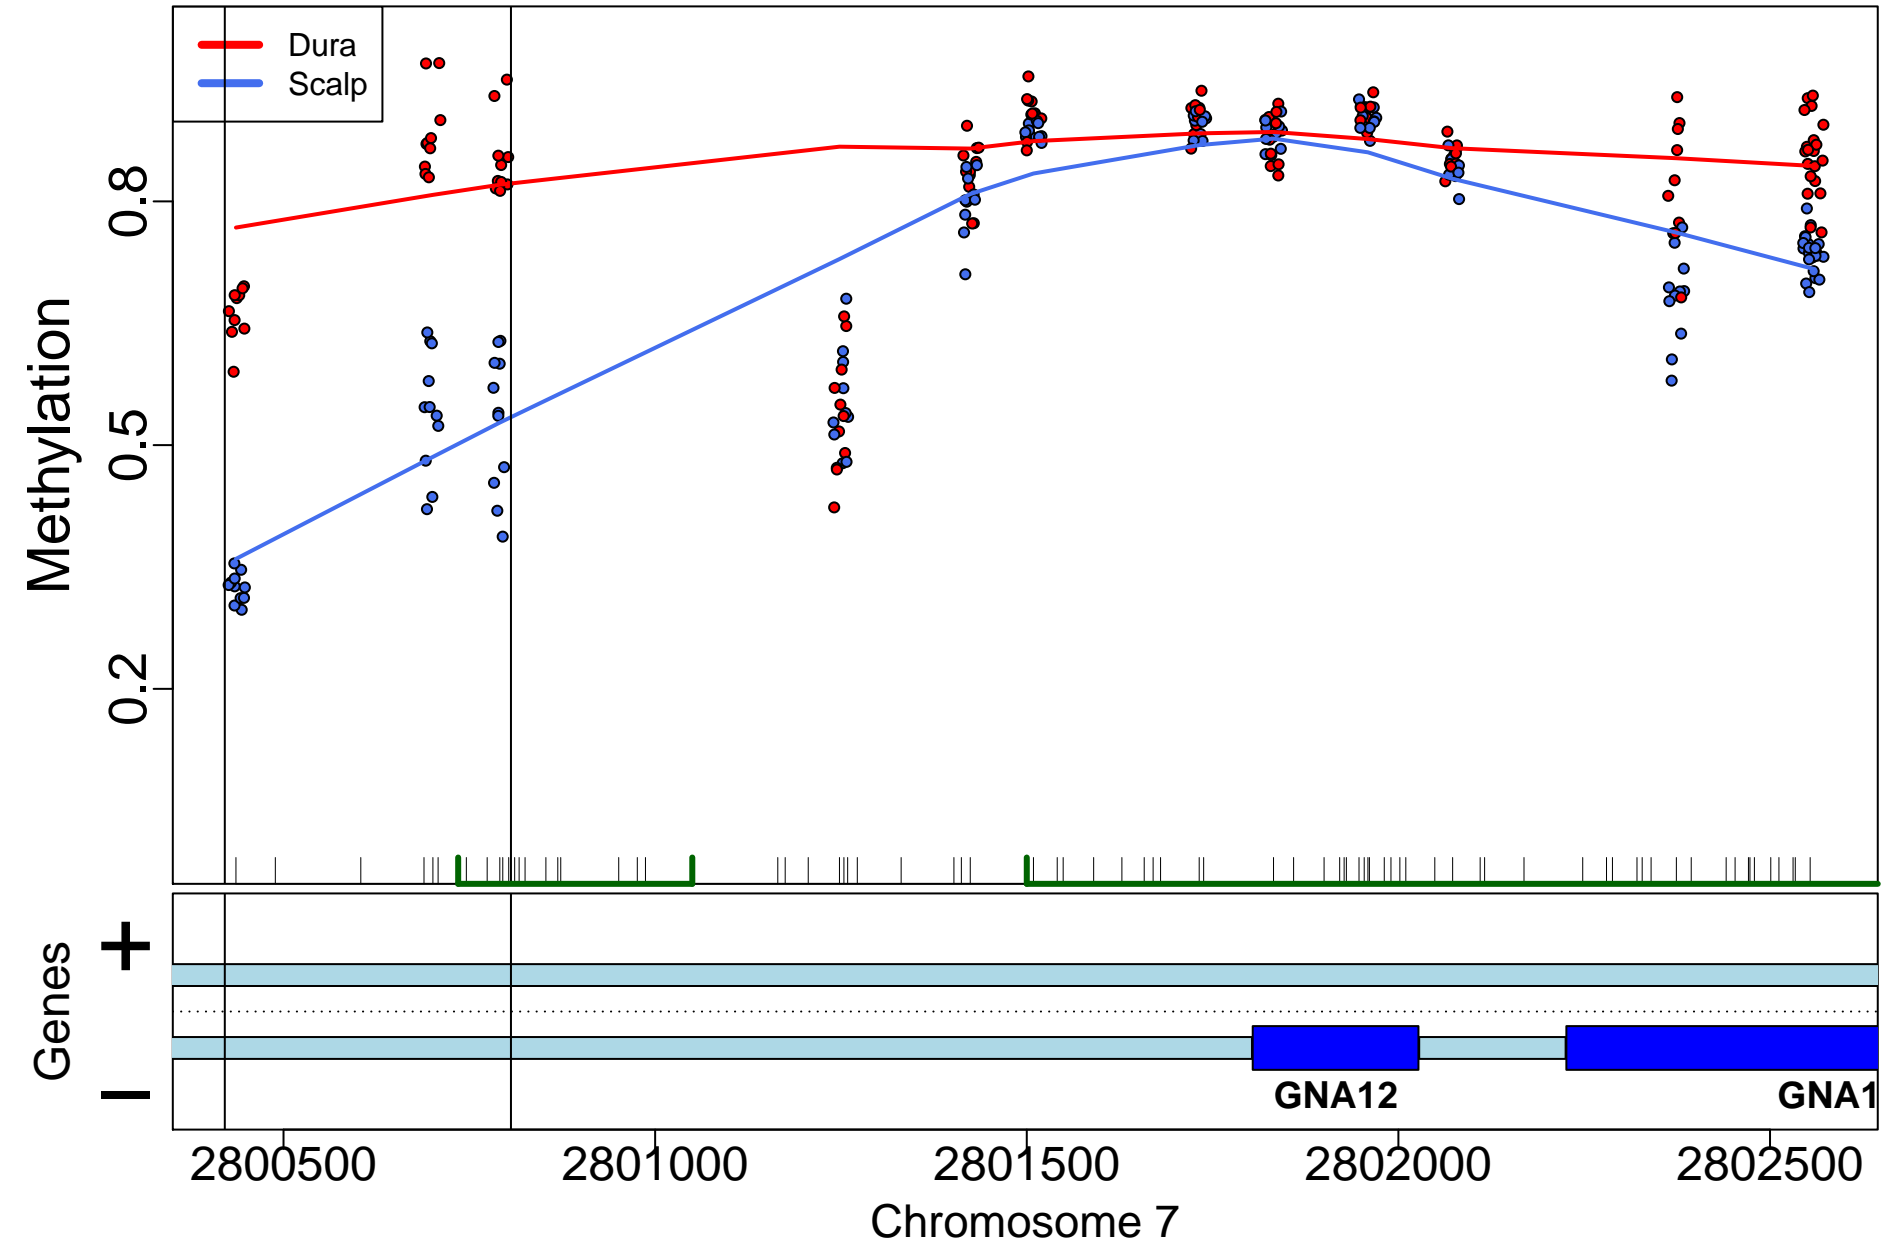

SPACA7; 49948bp from tss:upstream

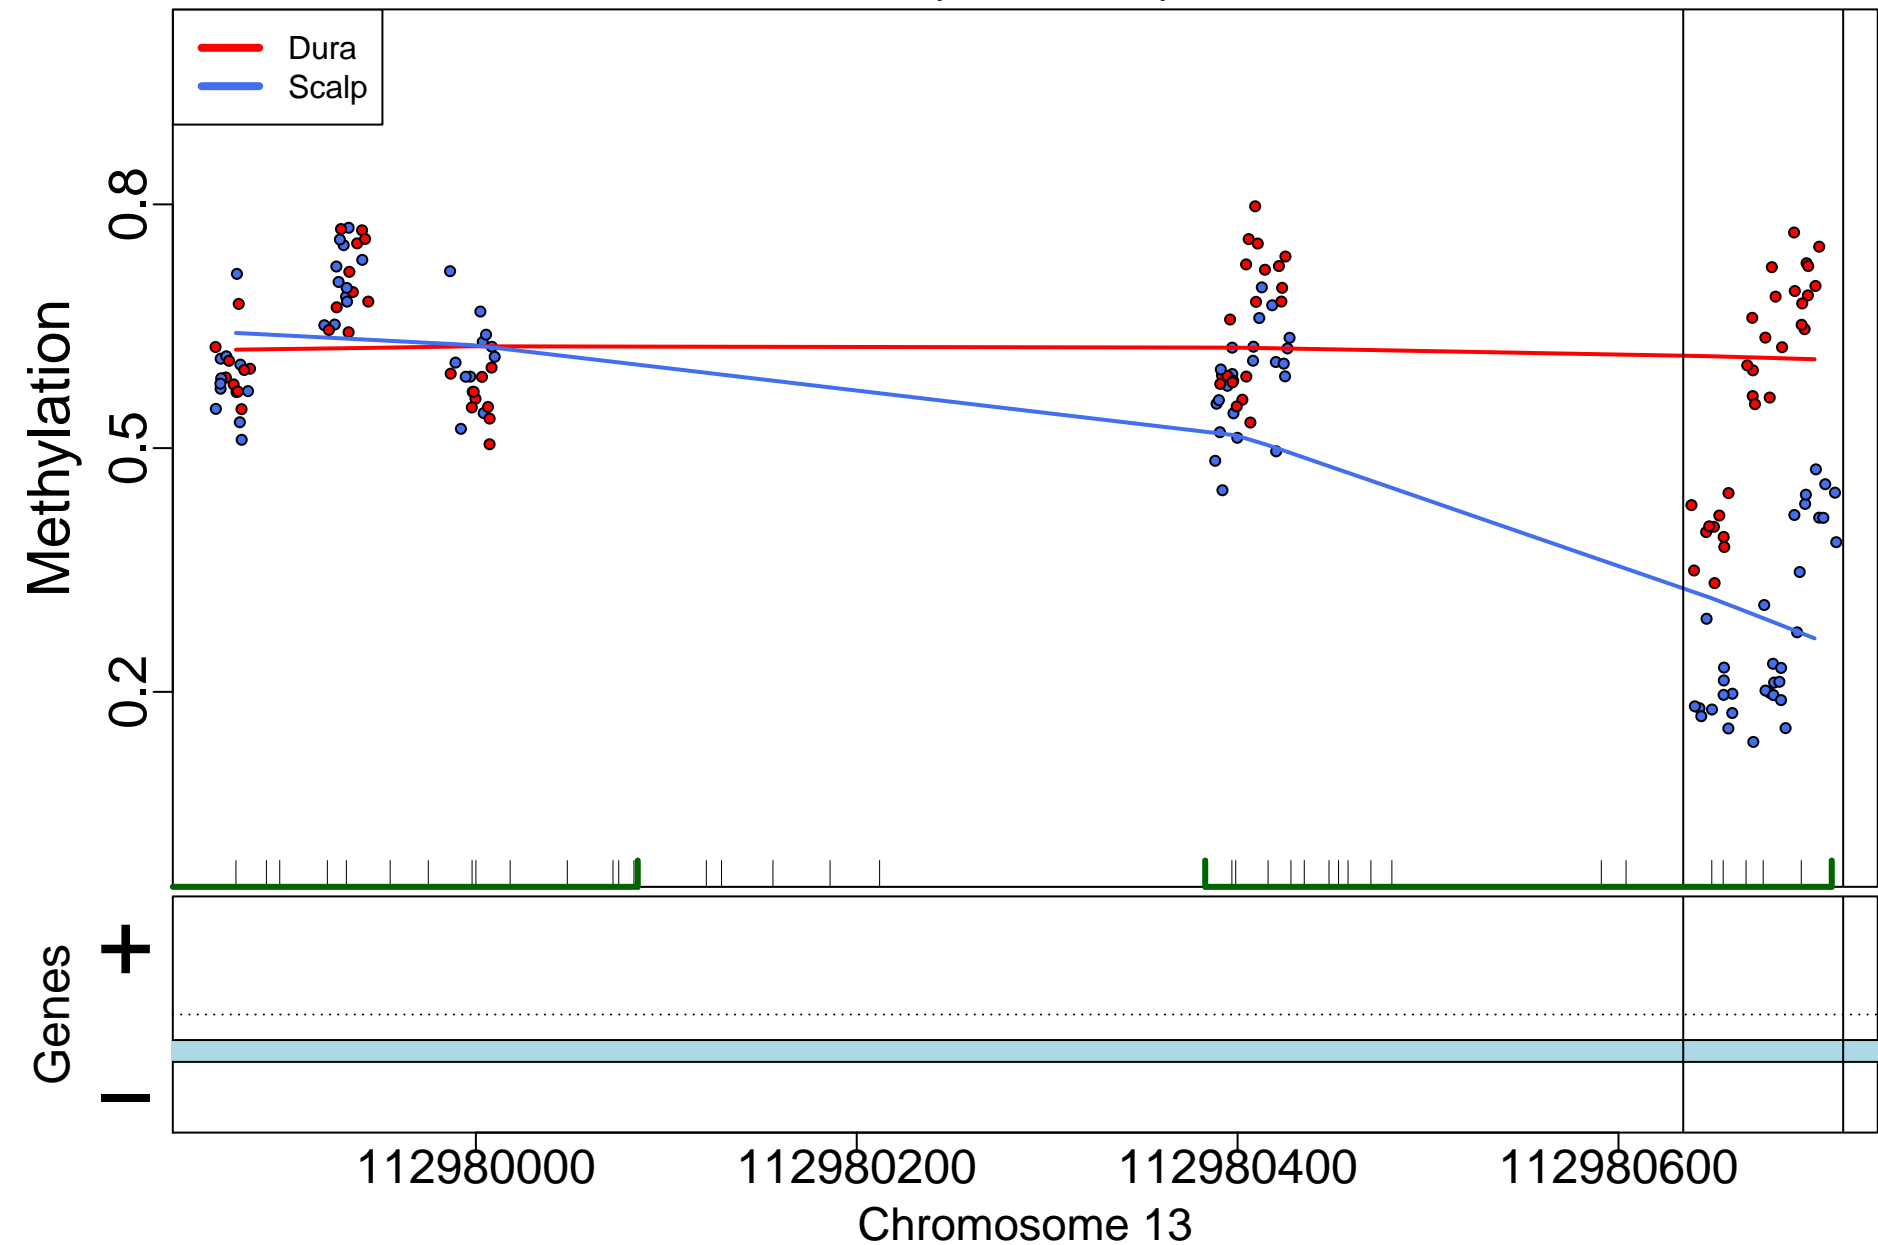

KRTAP17-1; 0bp from tss:overlaps 5'

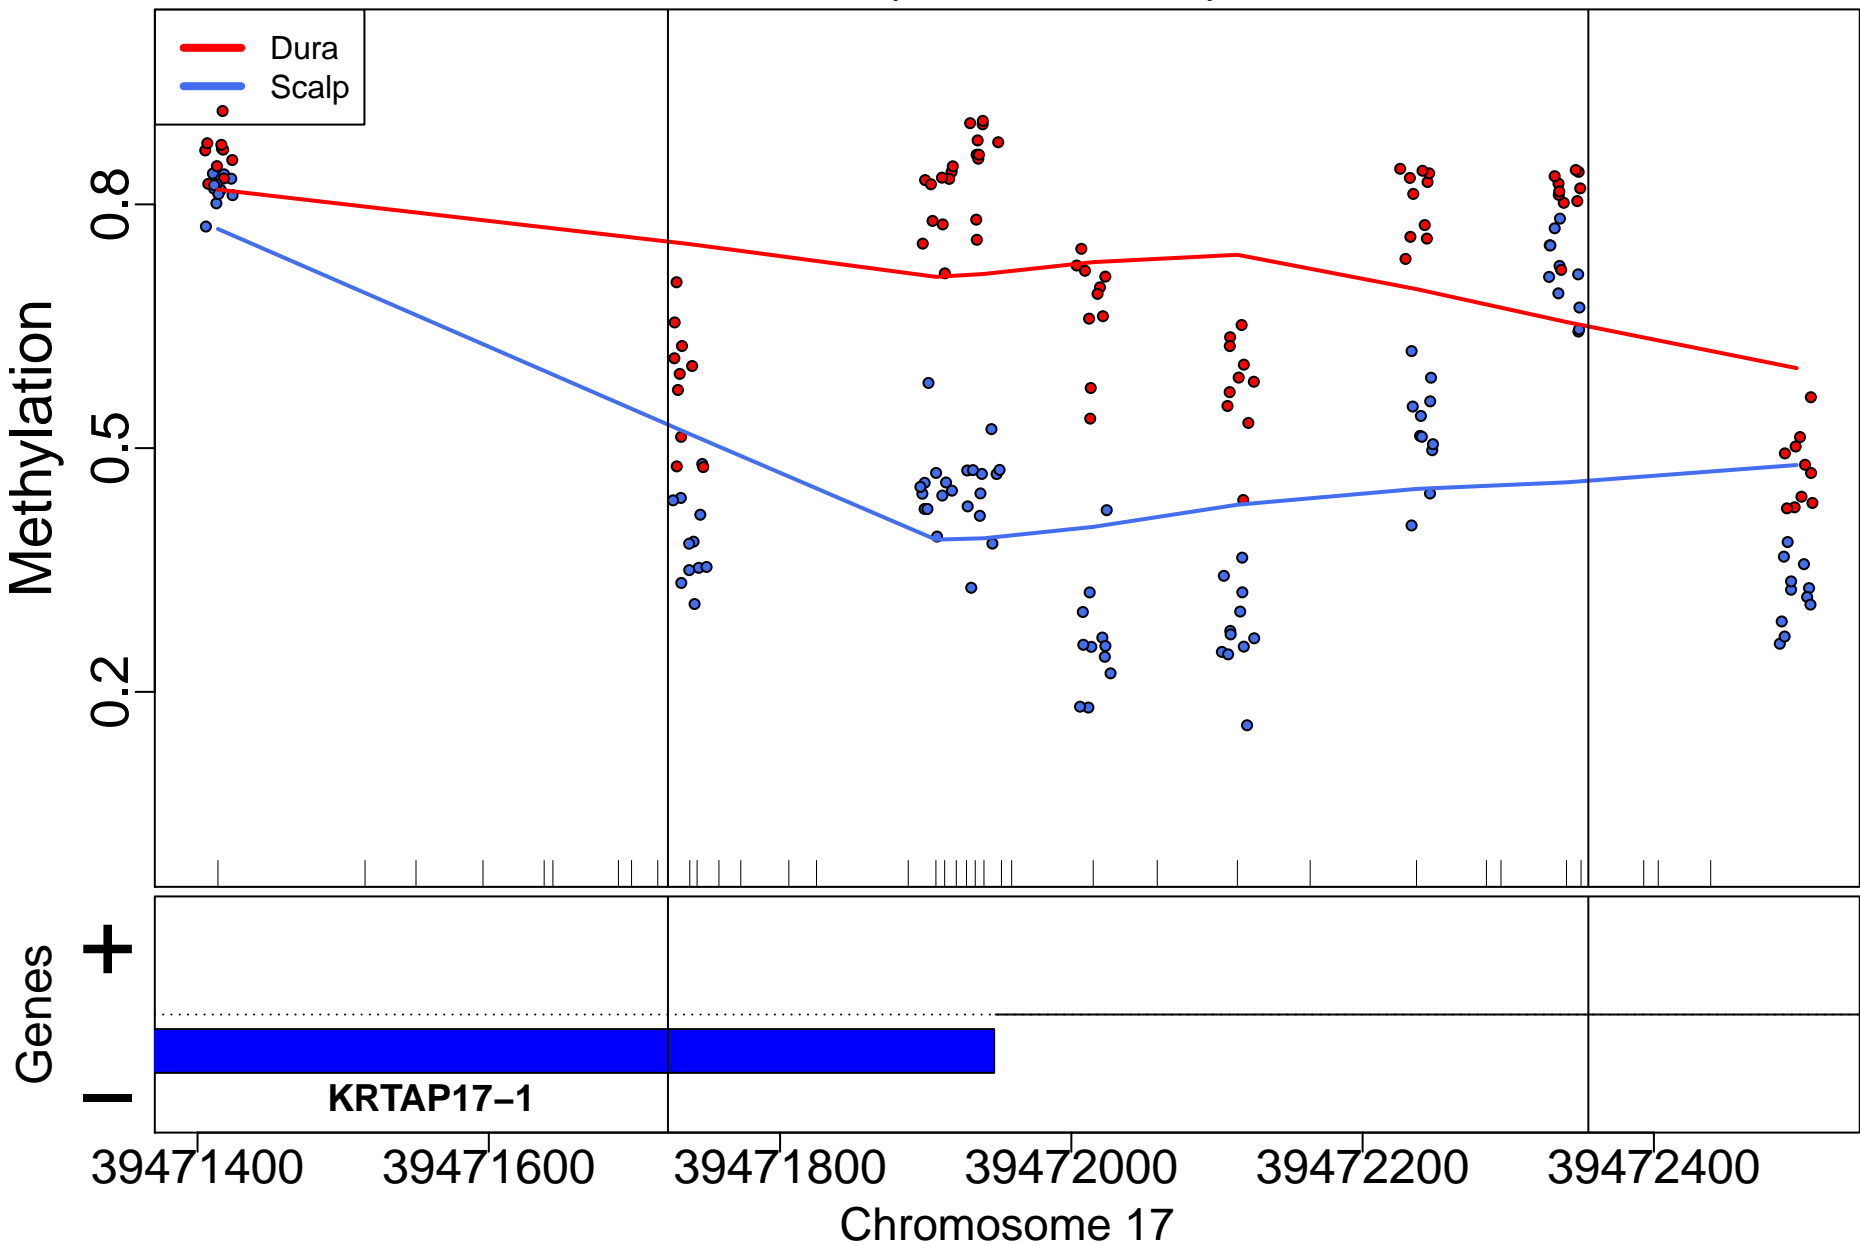

SIX1; 11188bp from tss:downstream

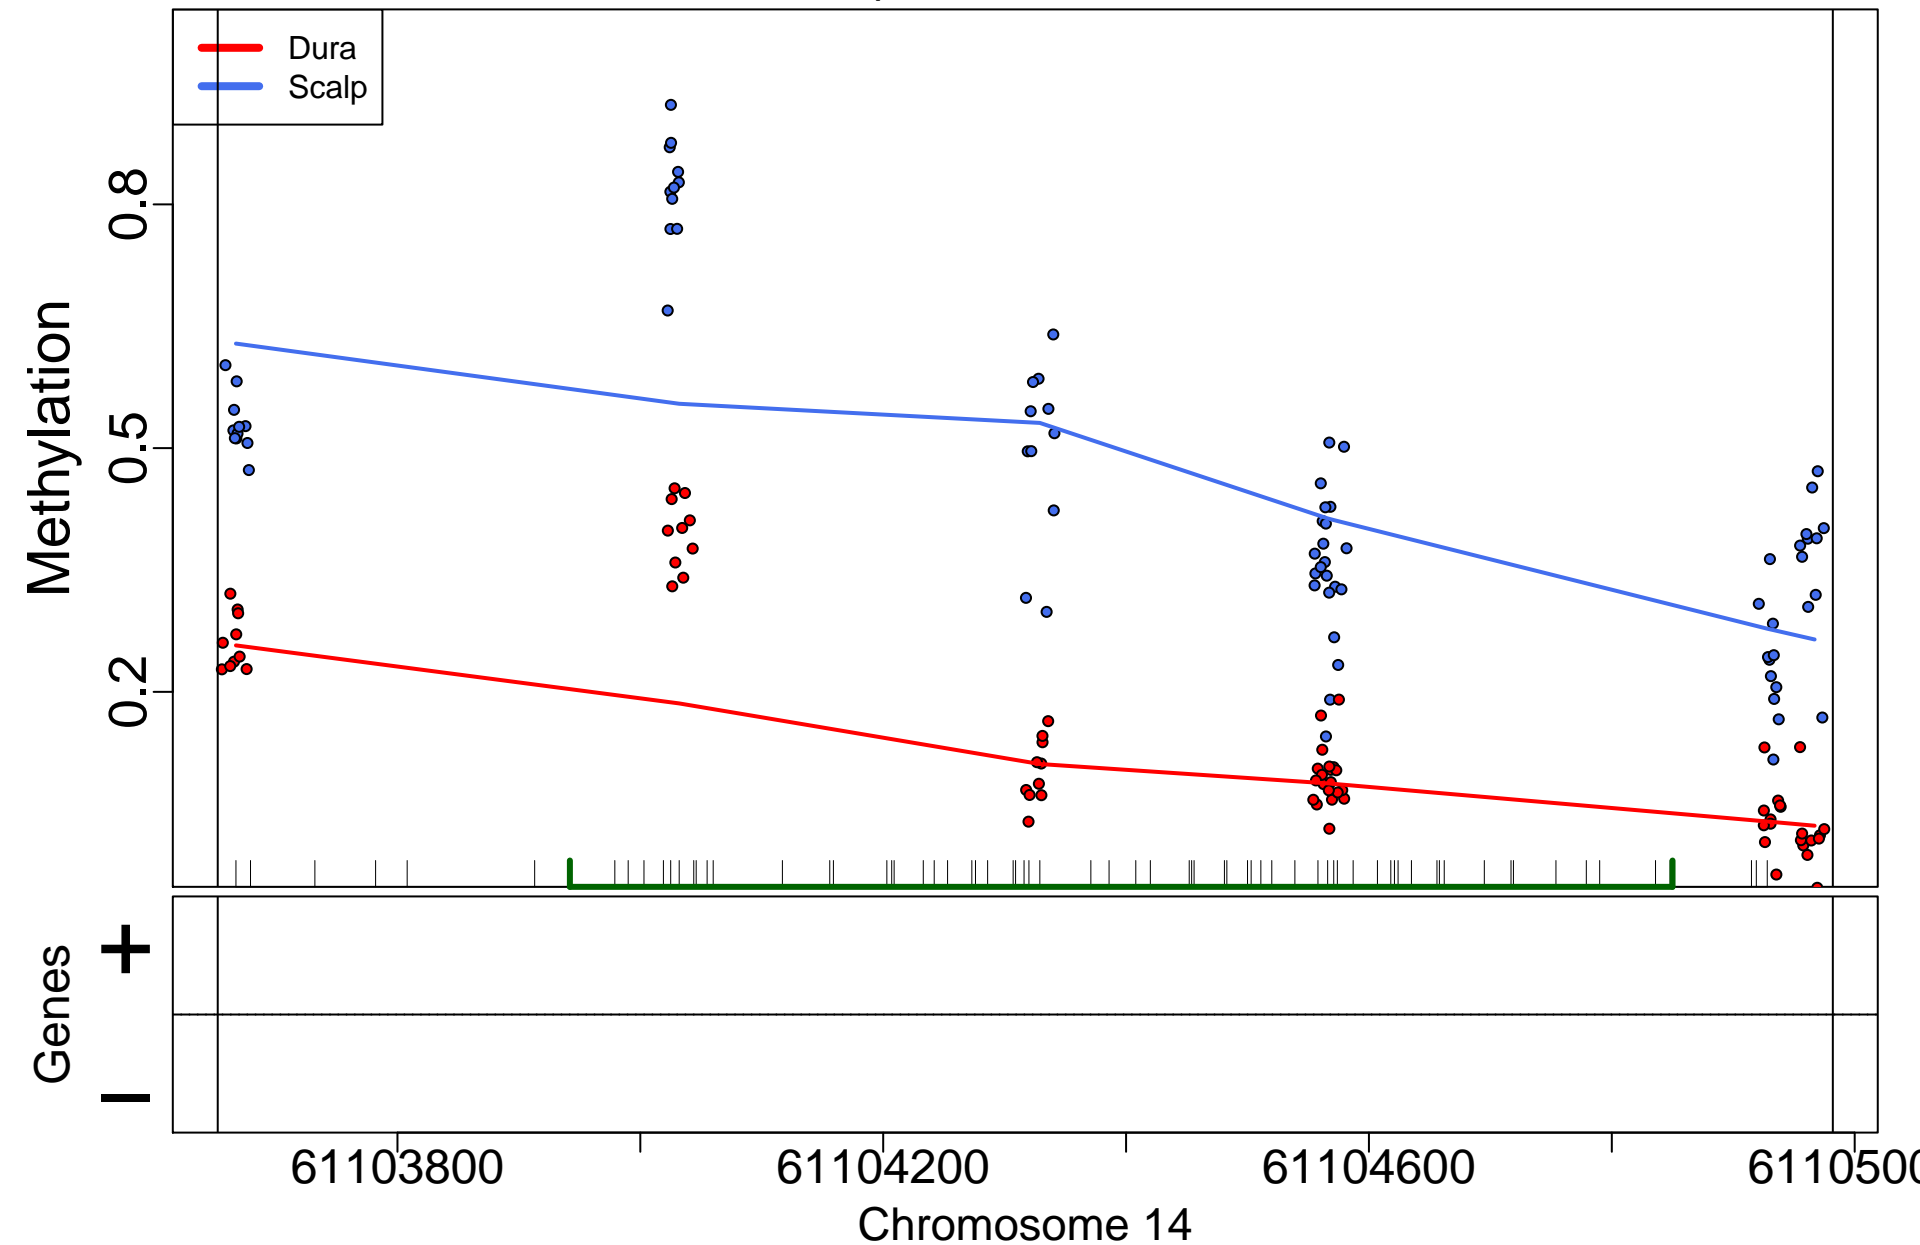

PRDM16; 346245bp from tss:inside intron

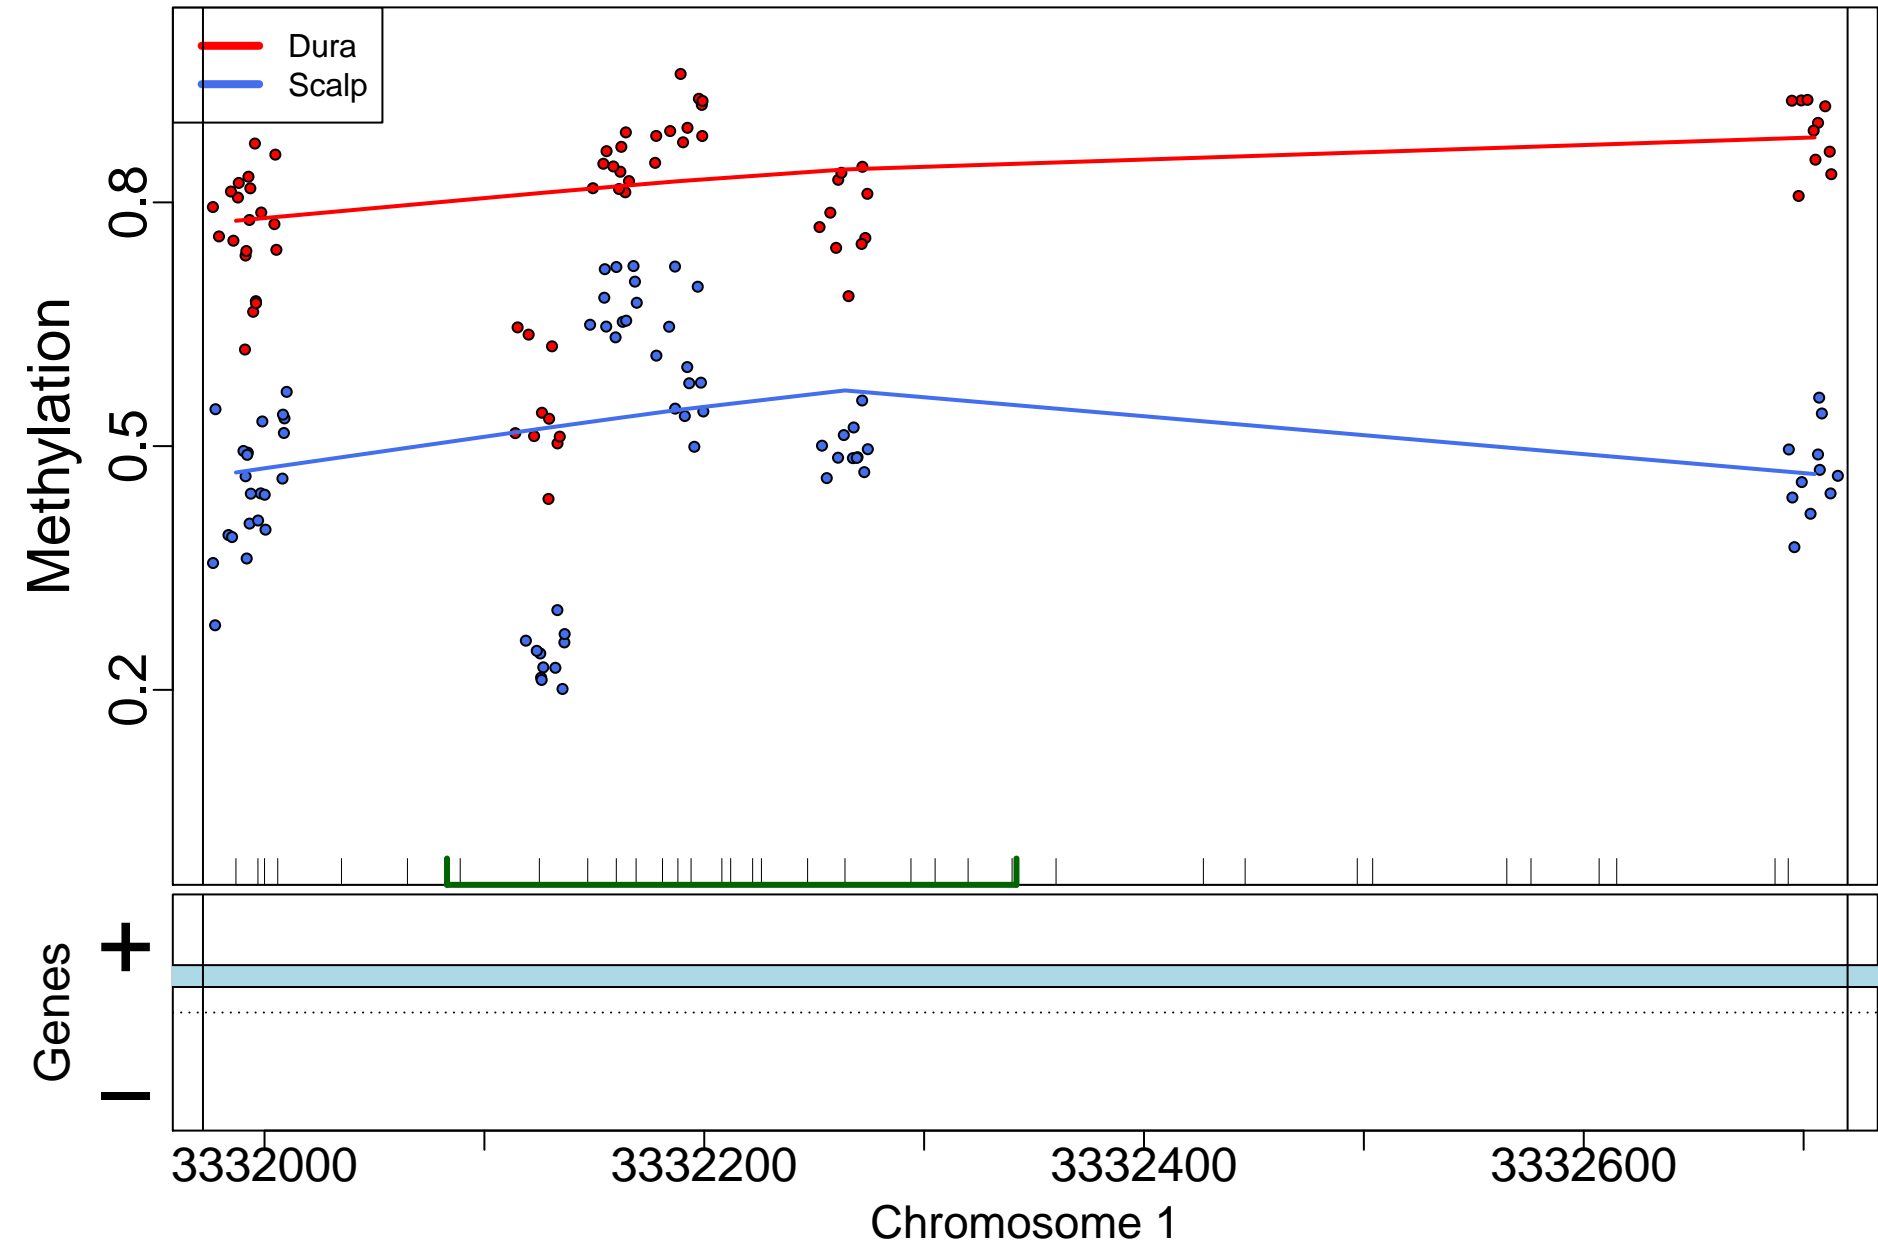

KCP; 19294bp from tss:covers exon(s)

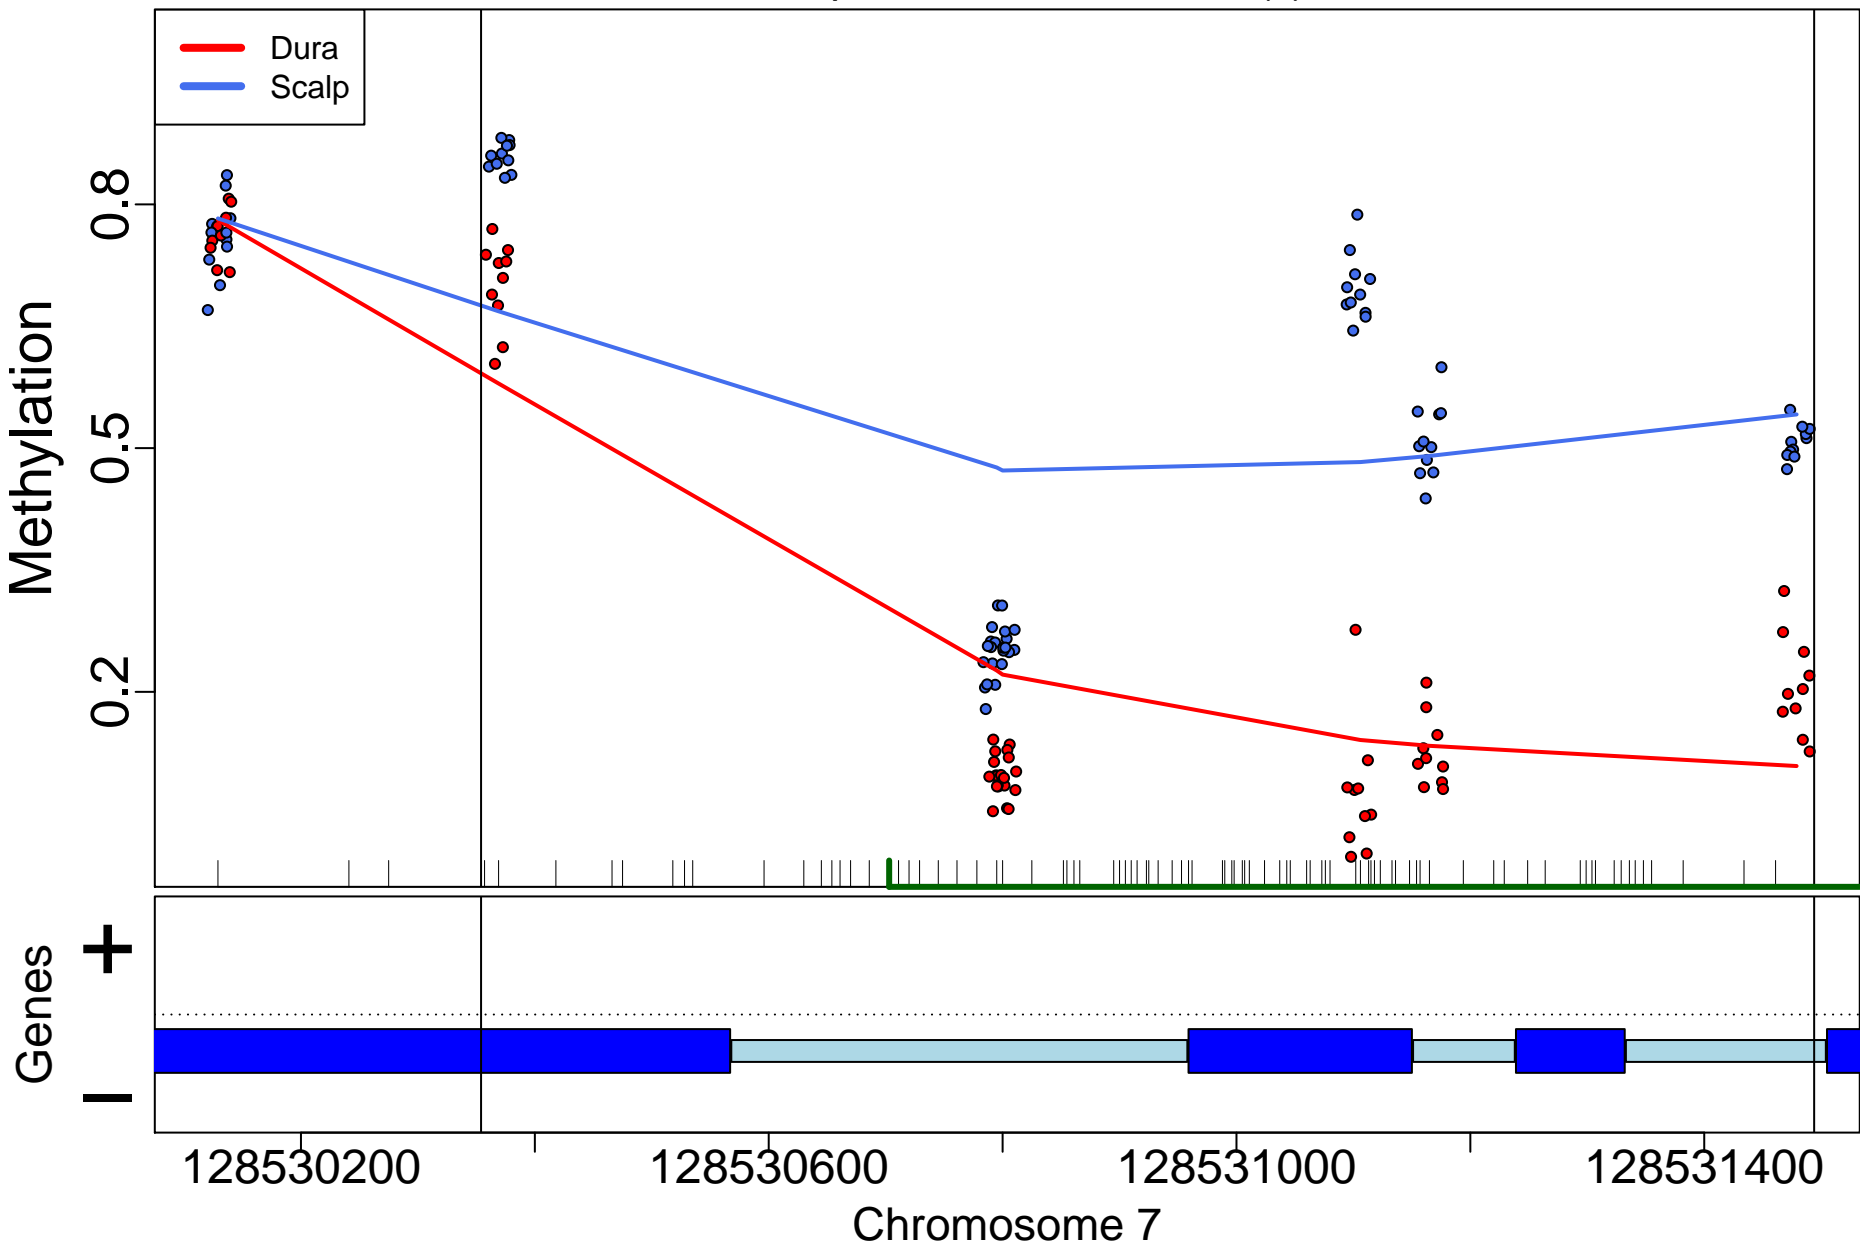

## MAD1L1; 121121bp from tss:inside intron

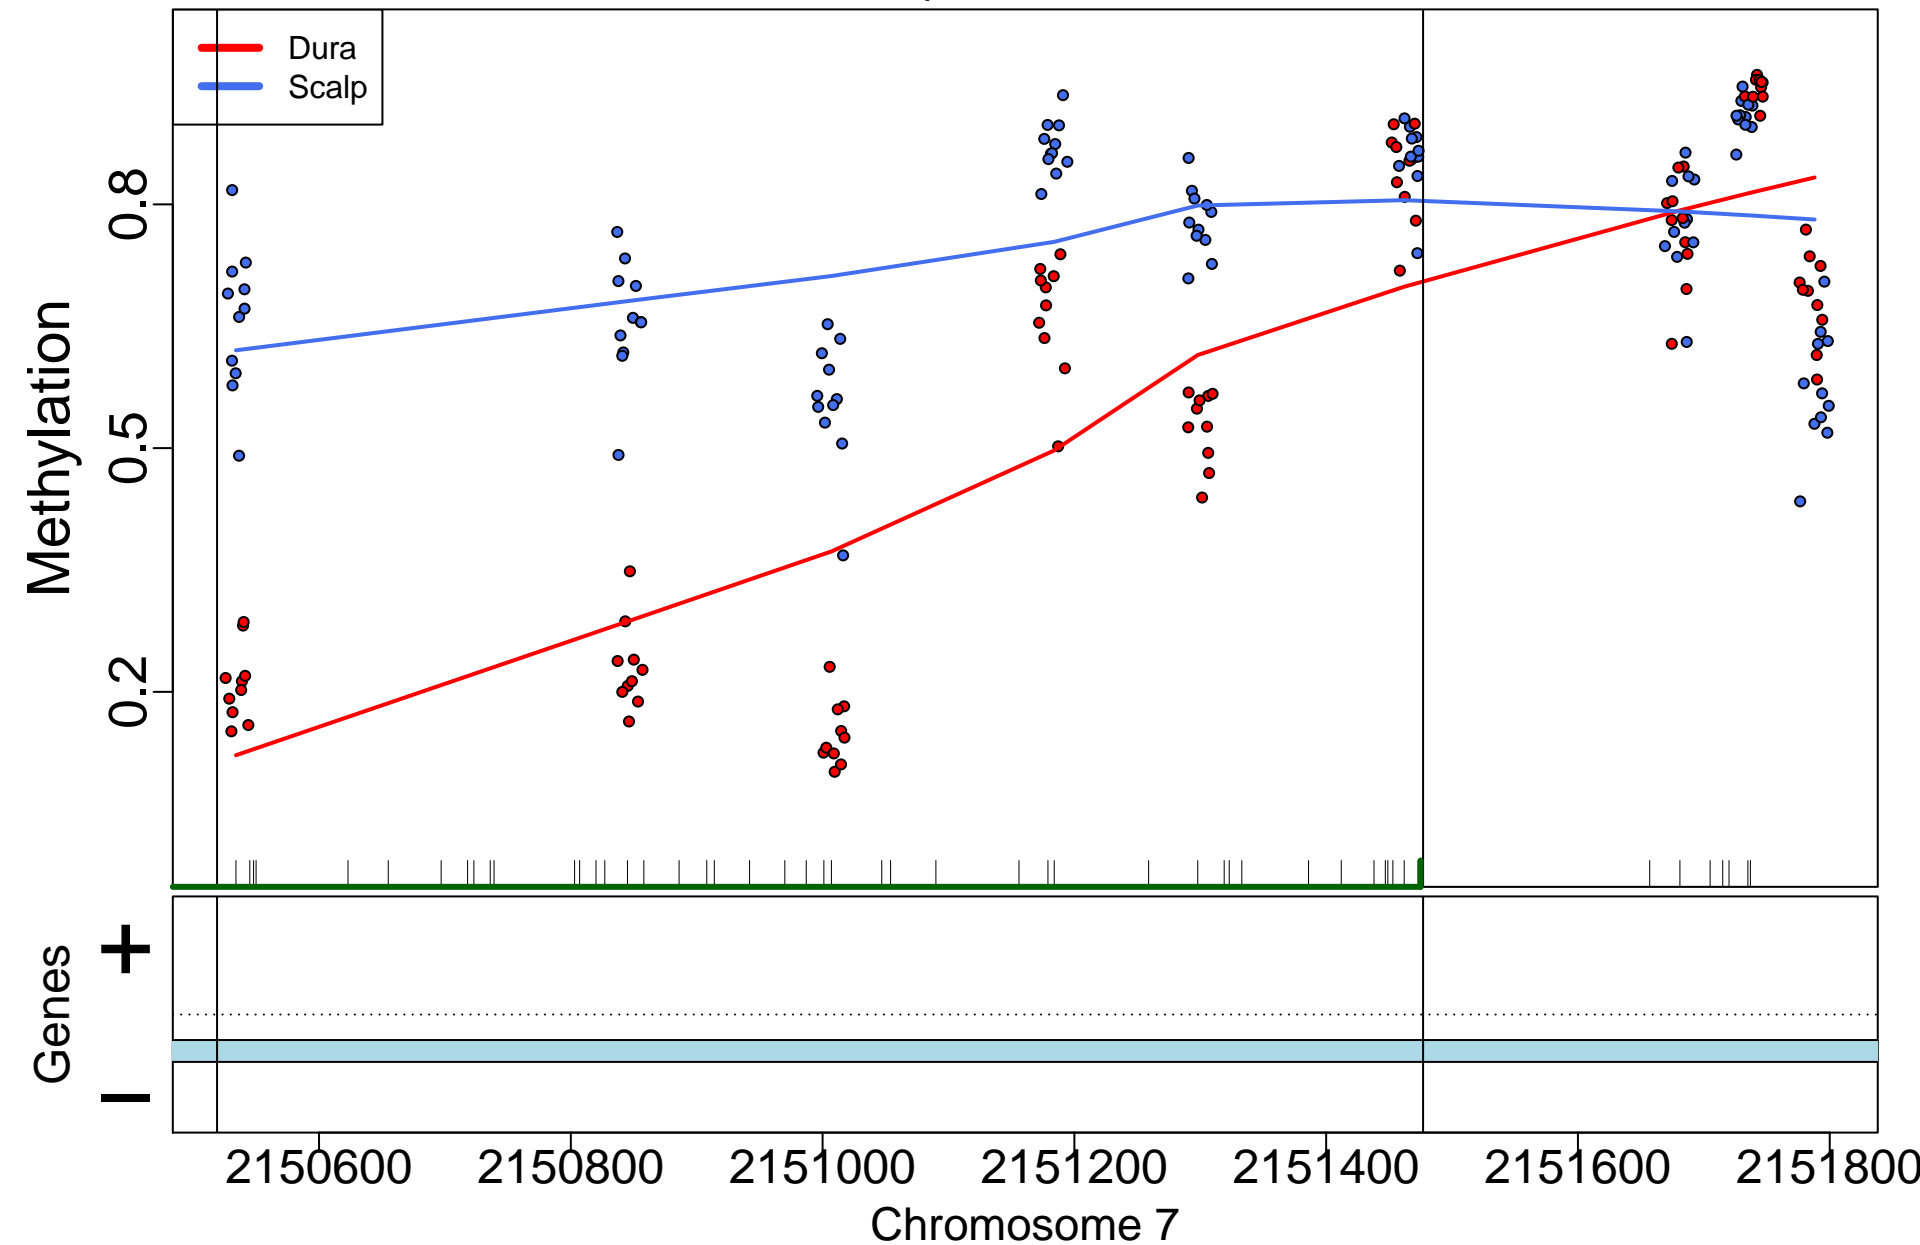



SEC61G; 128990bp from tss:upstream

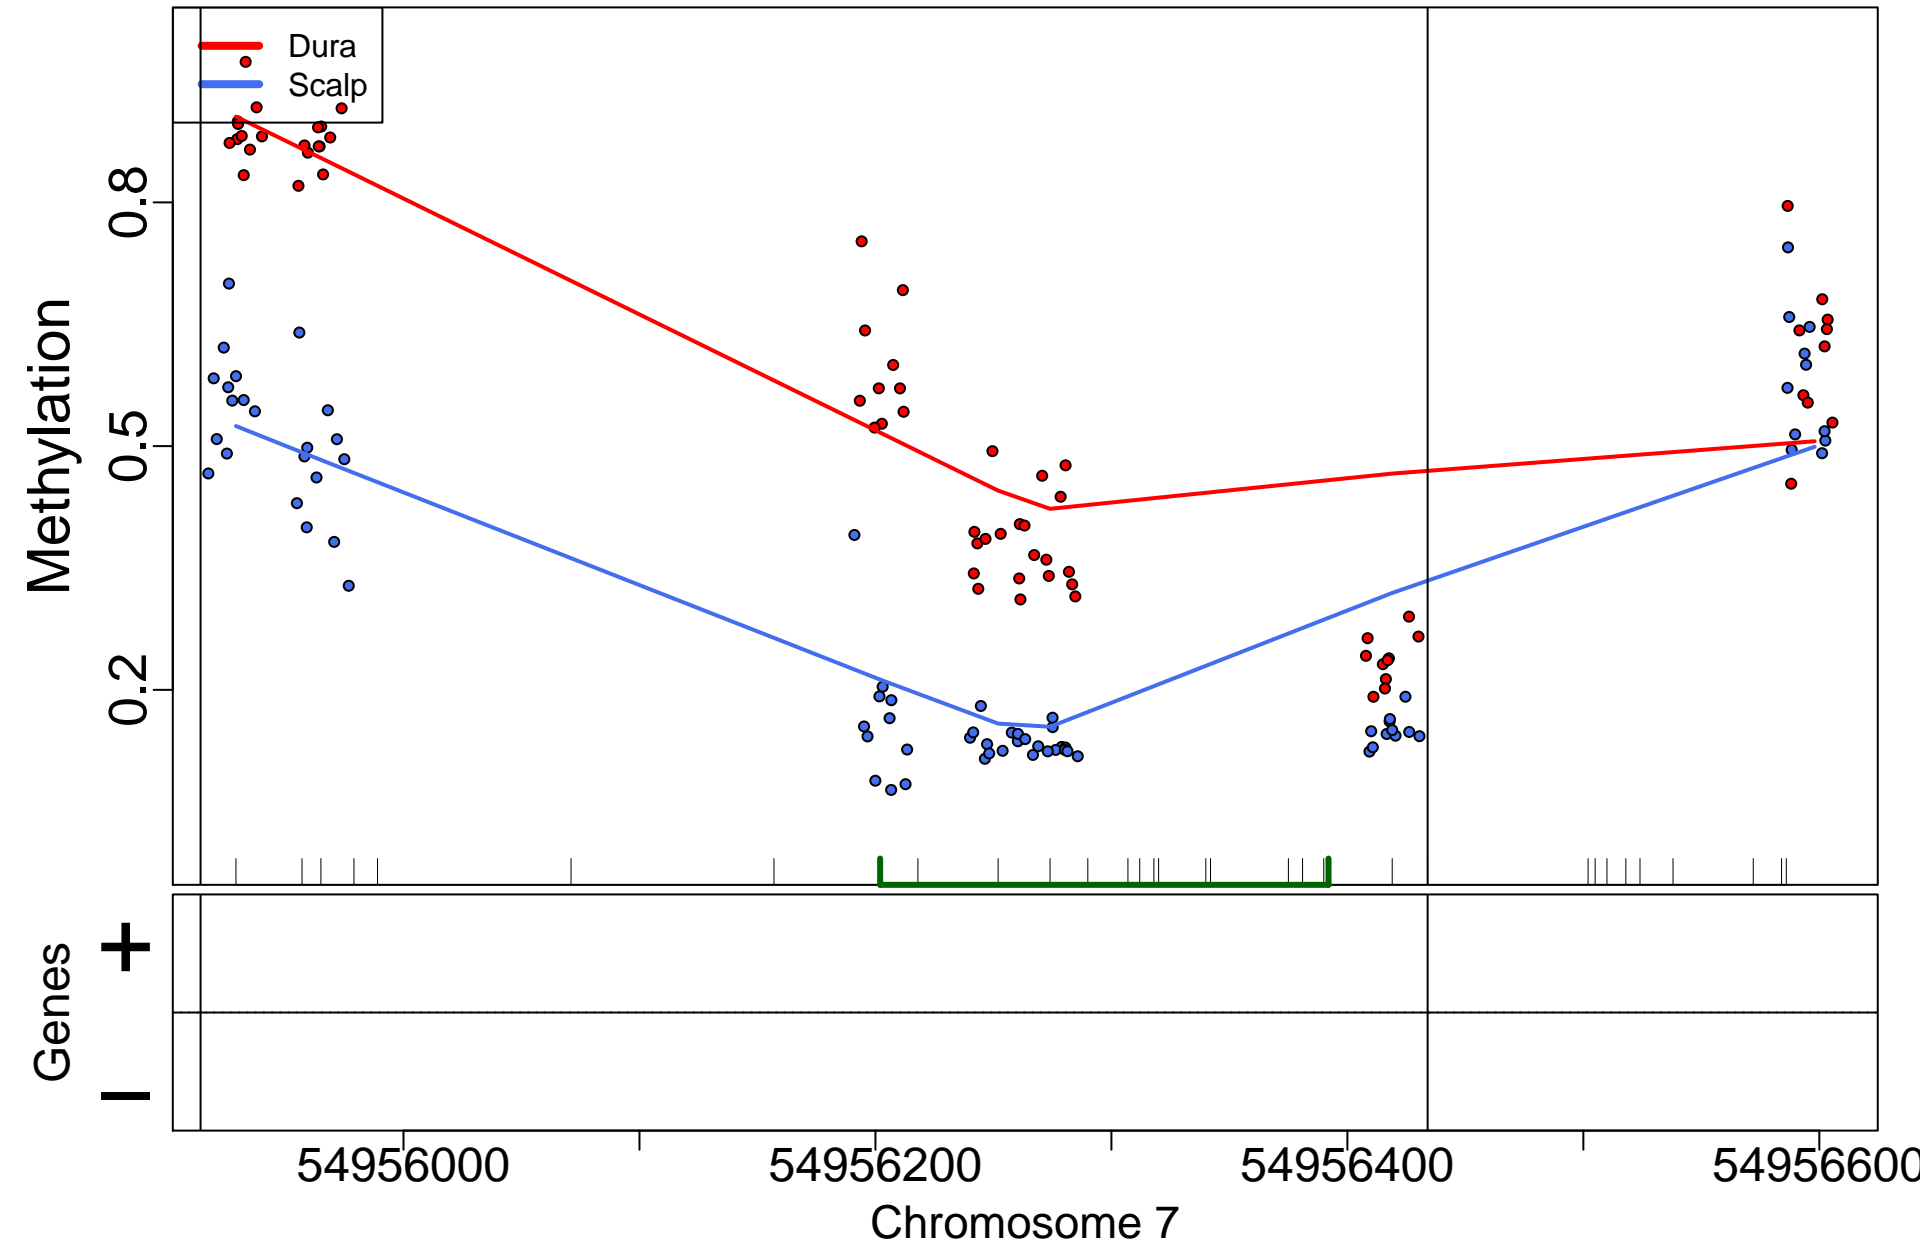

# FAAH; 94bp from tss:promoter

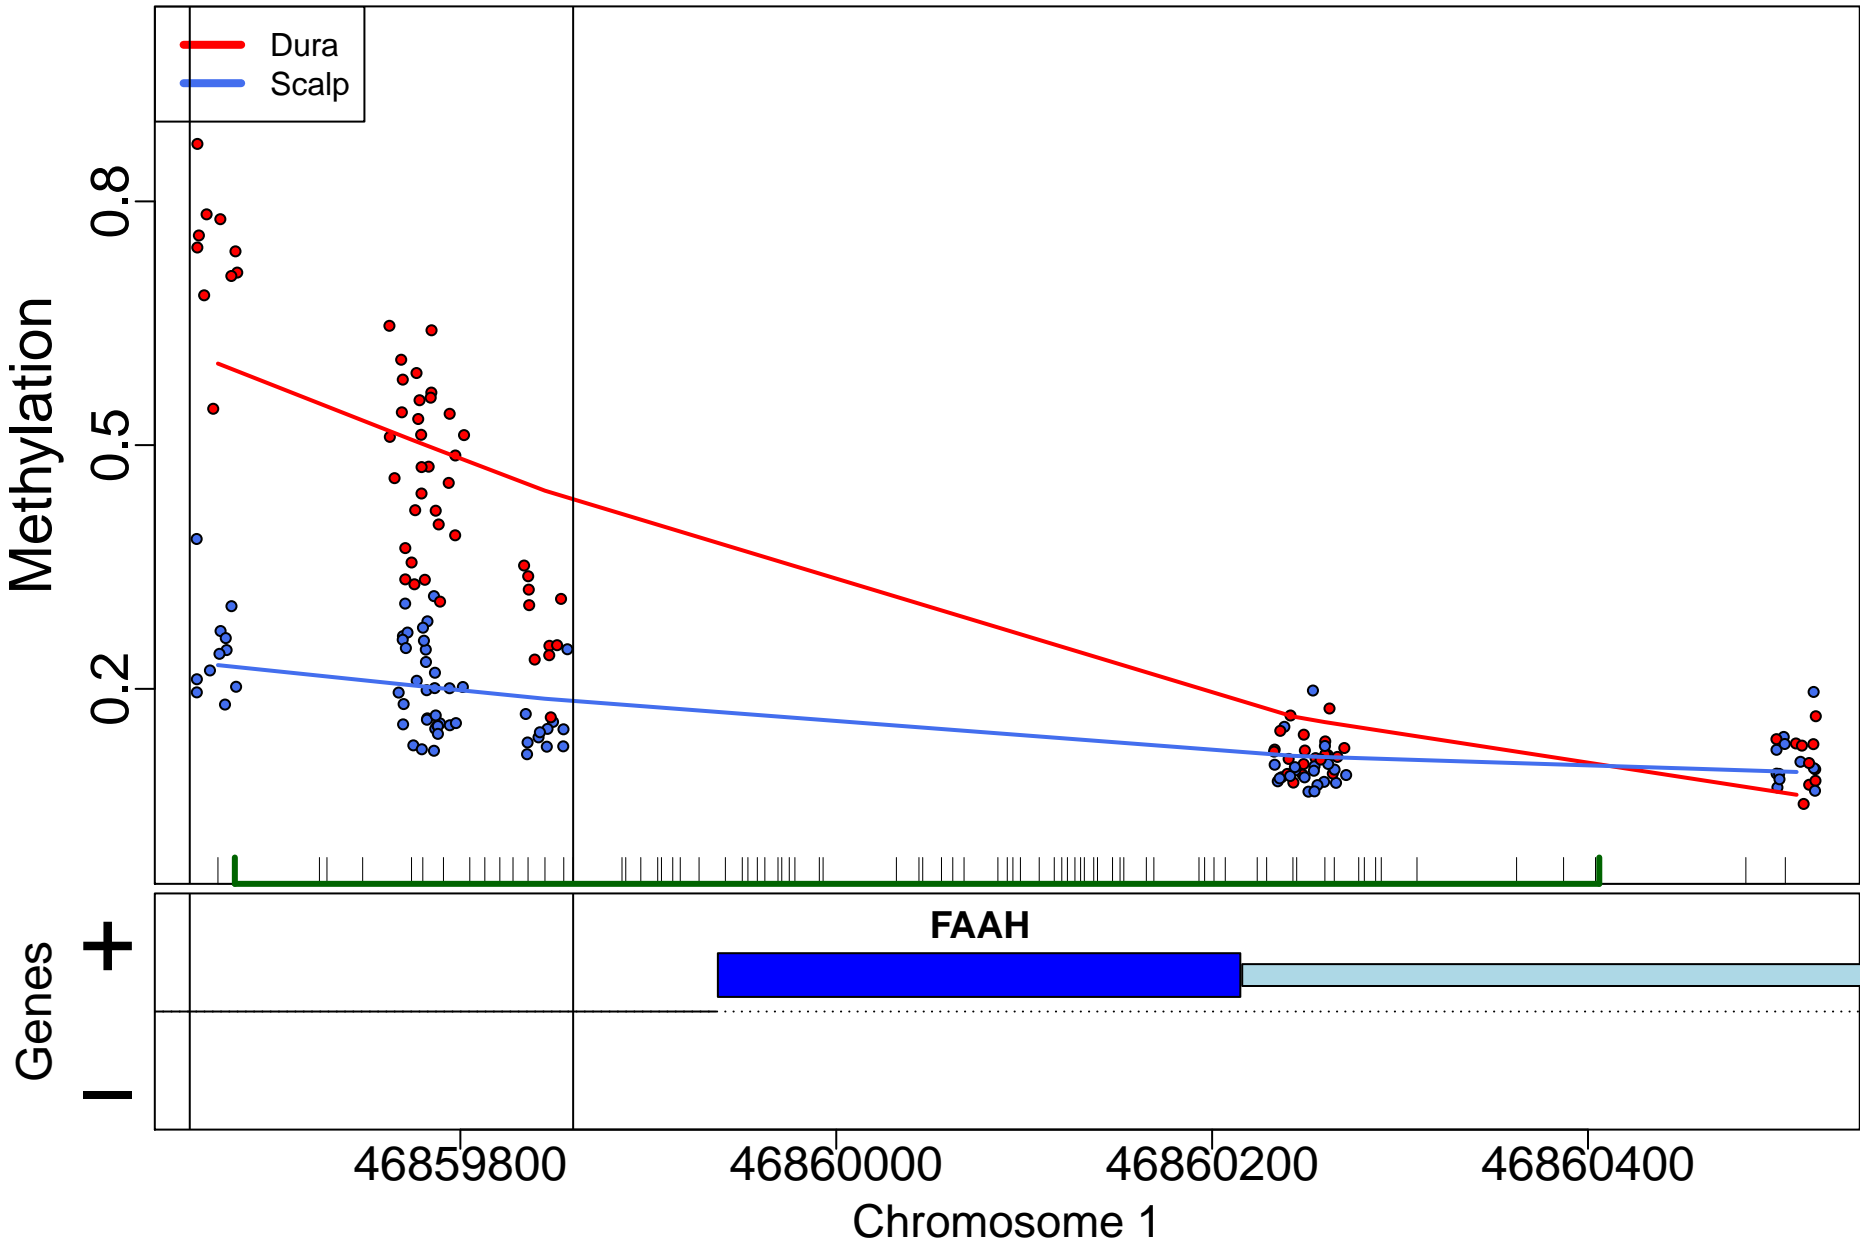

# CASC15; 0bp from tss:NA

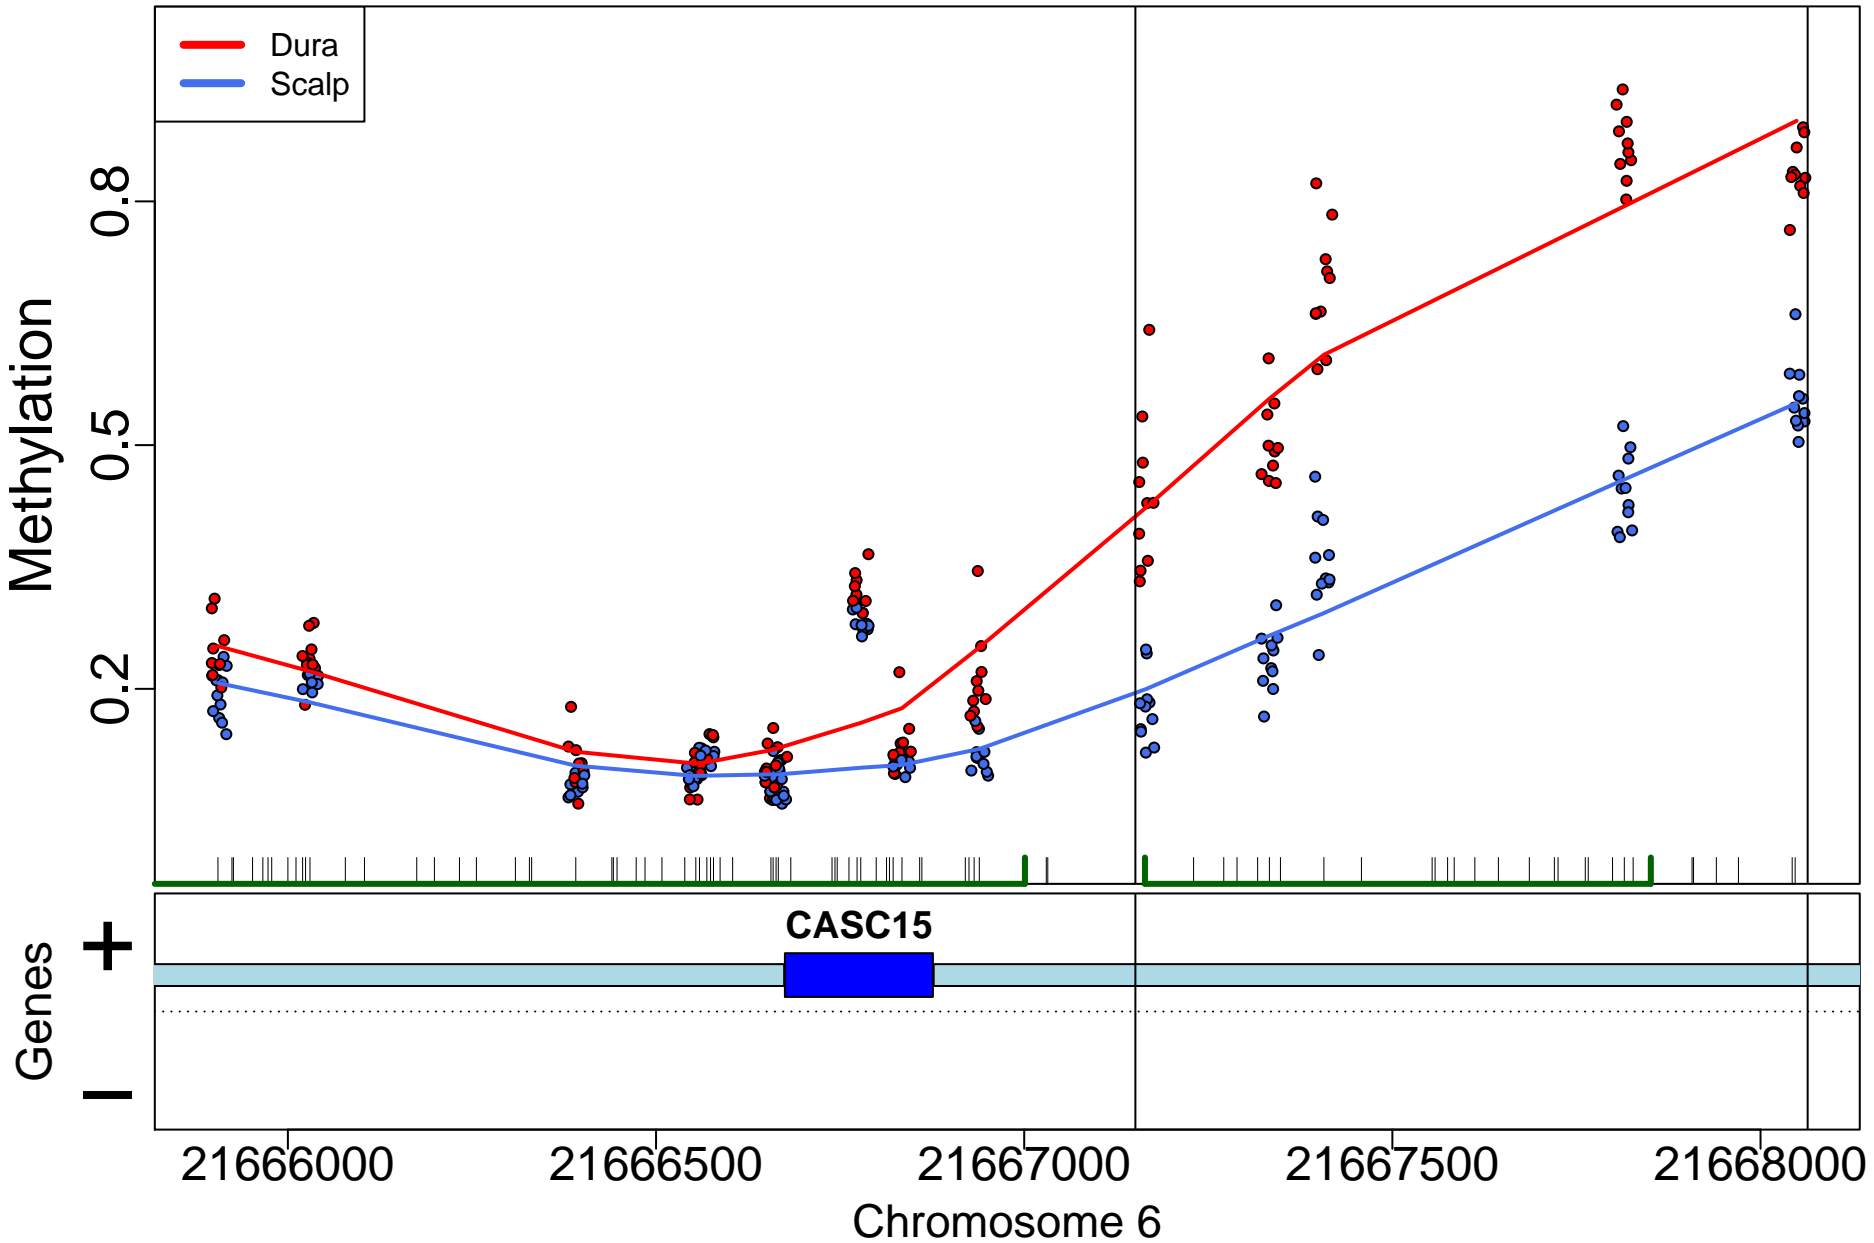

## FRMD4A; 300875bp from tss:covers exon(s)

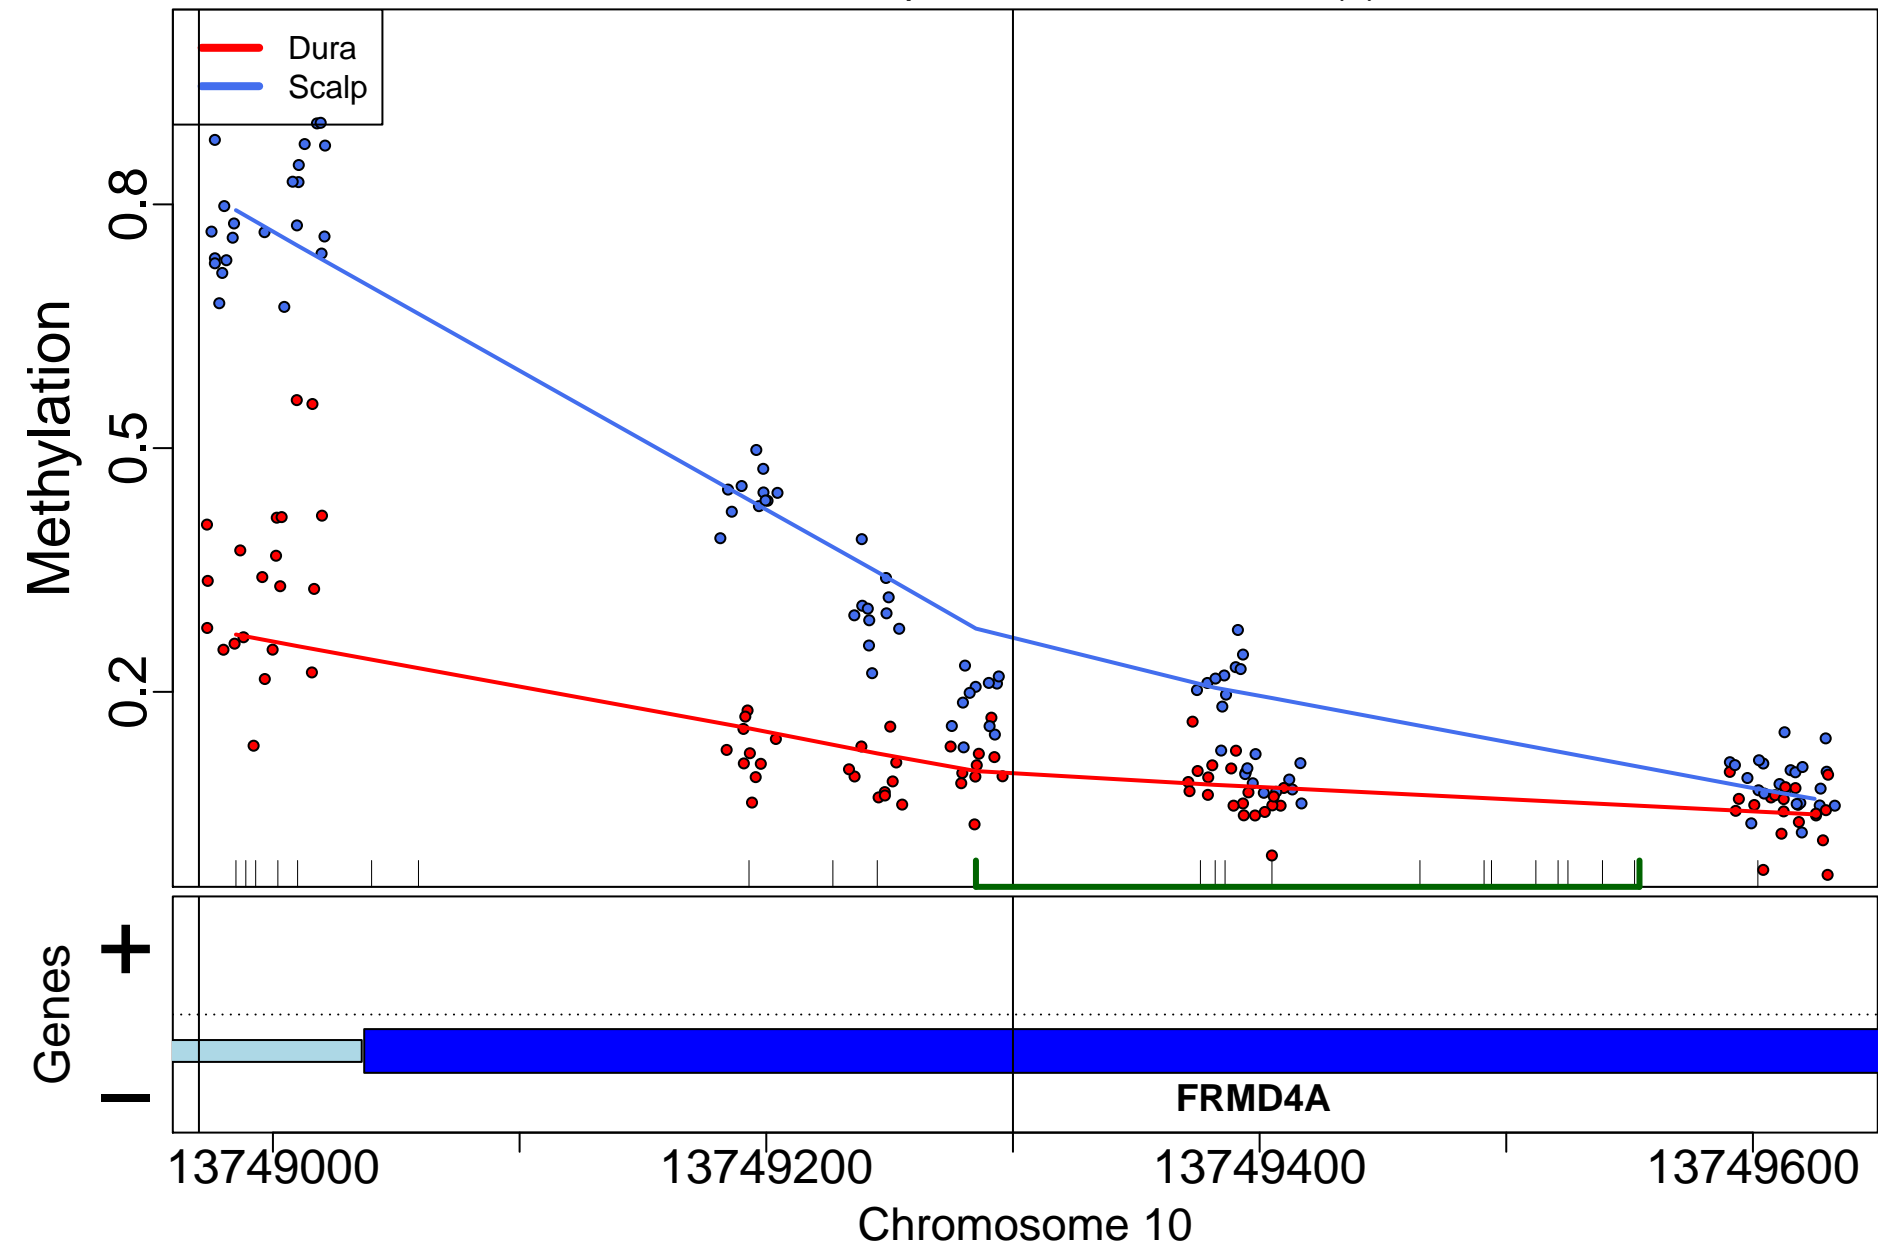

HOXA10-HOXA9; 0bp from tss:NA

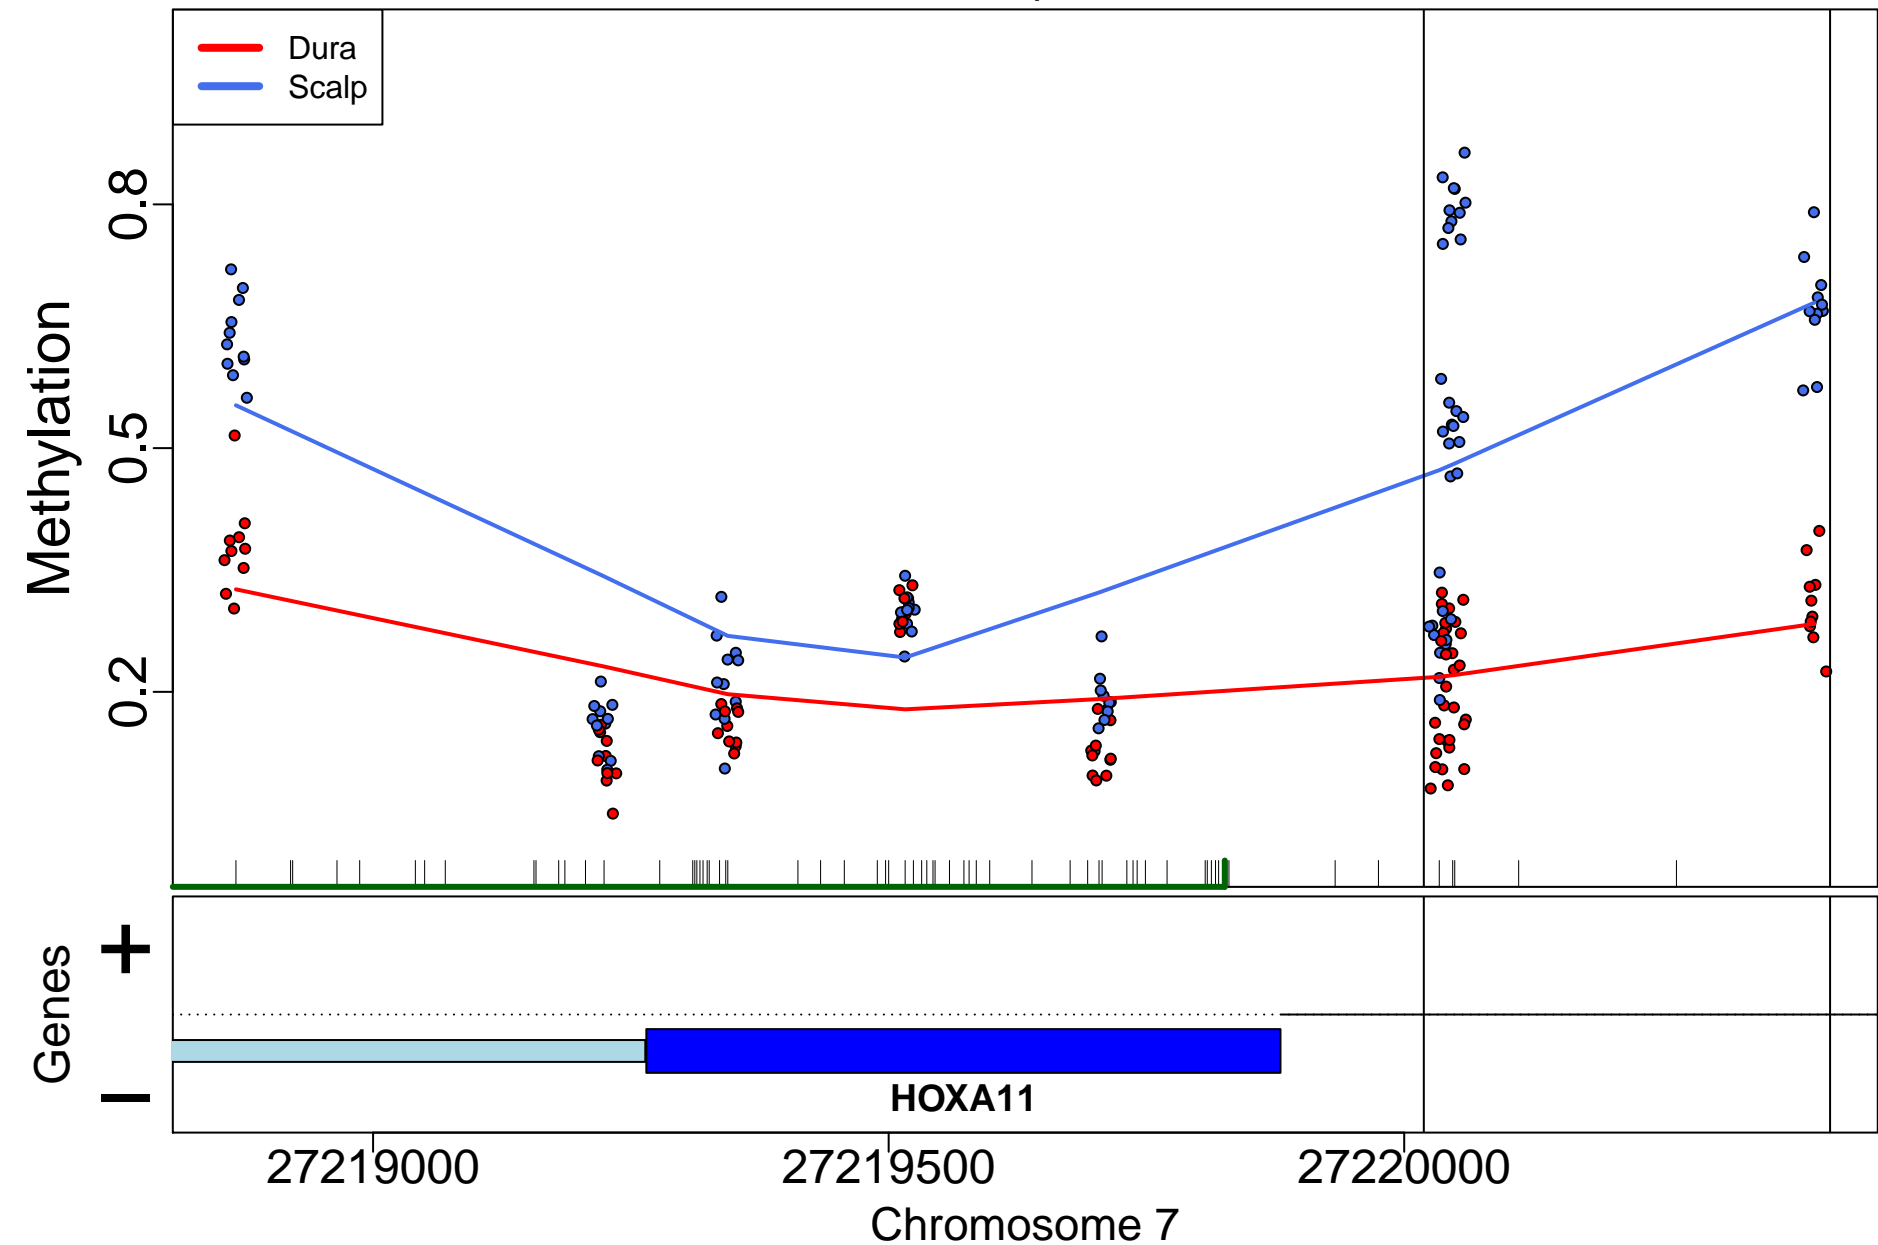

MITF; 259791bp from tss:downstream

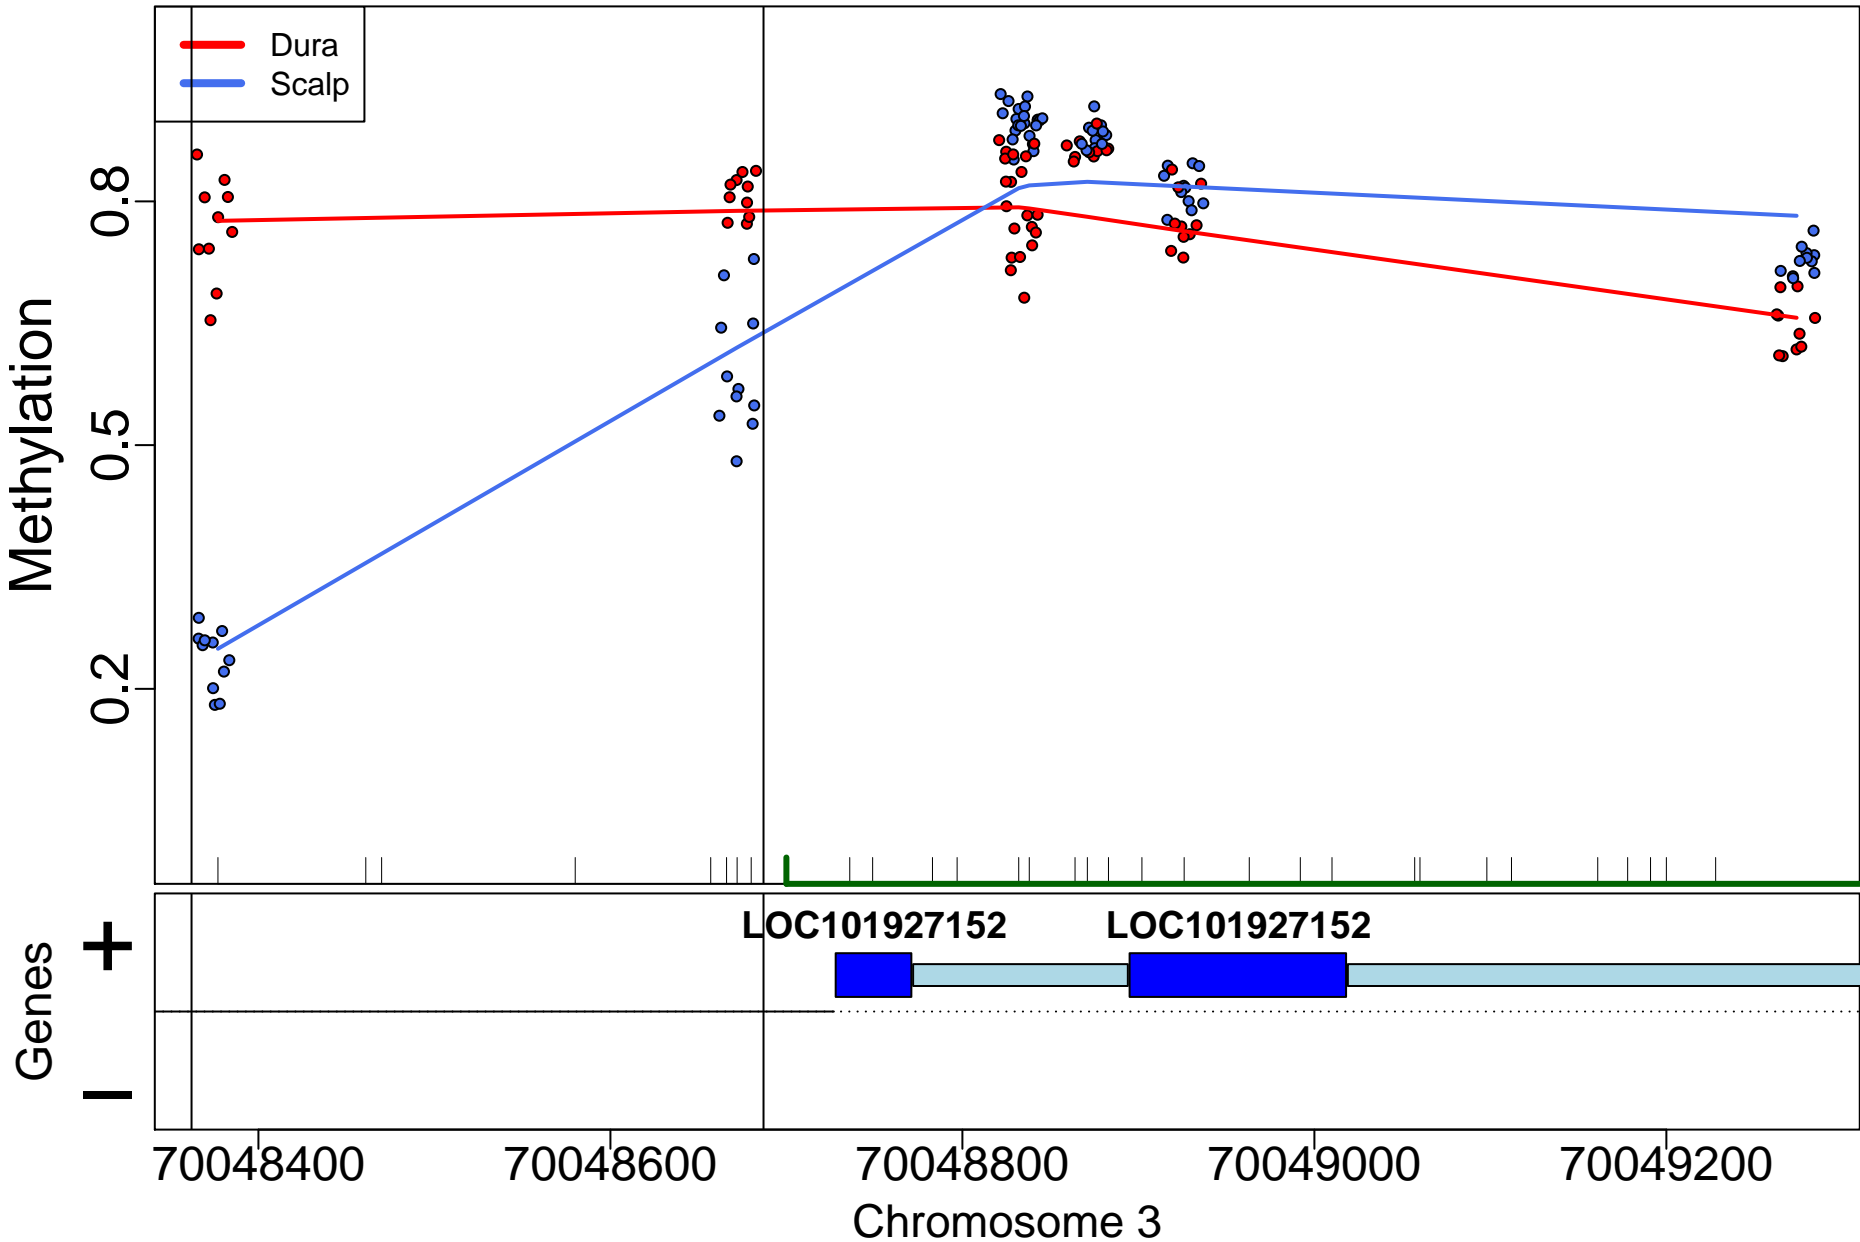

PALLD; 134093bp from tss:inside intron

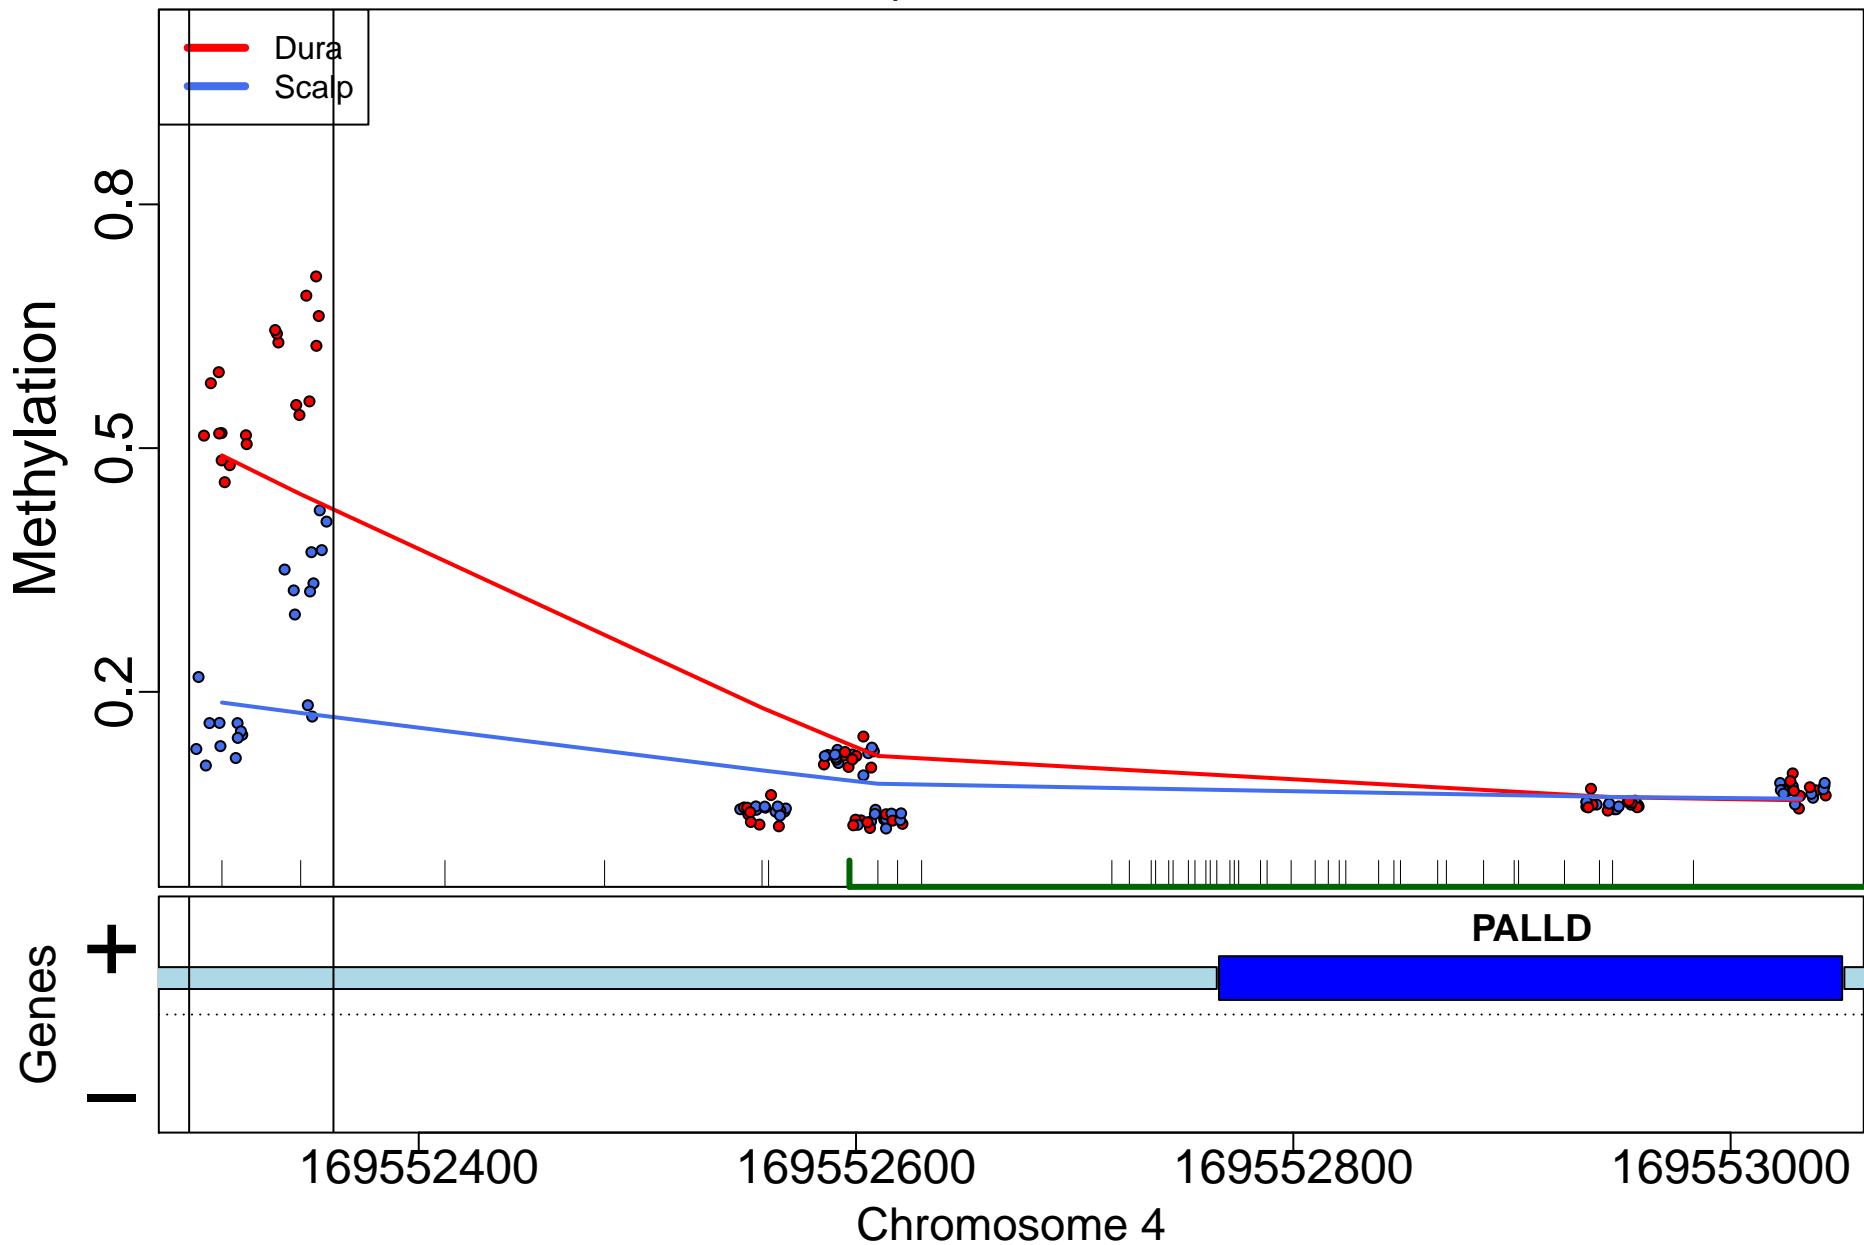

# SIX2; 3831bp from tss:upstream

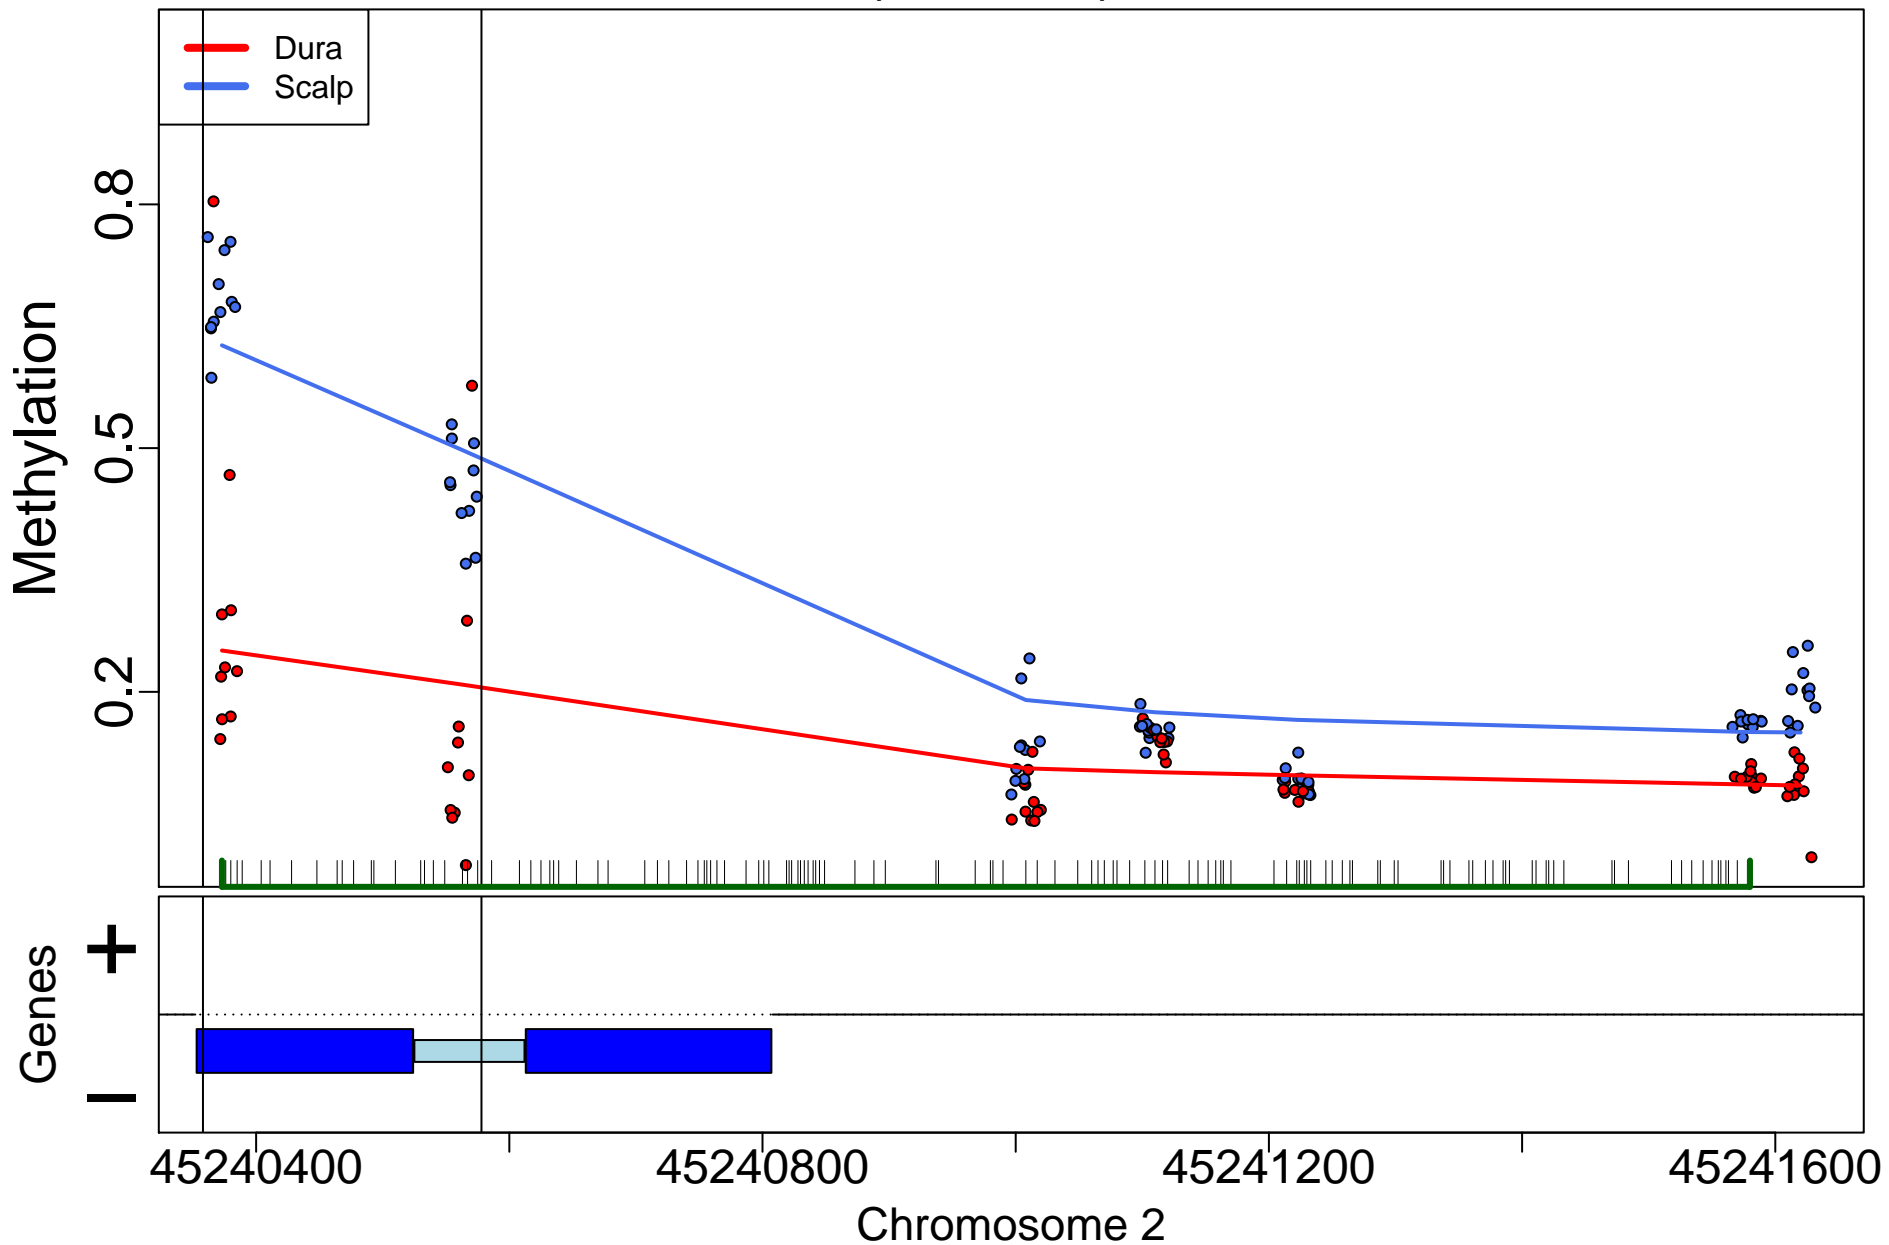



MOV10; 1114bp from tss:promoter

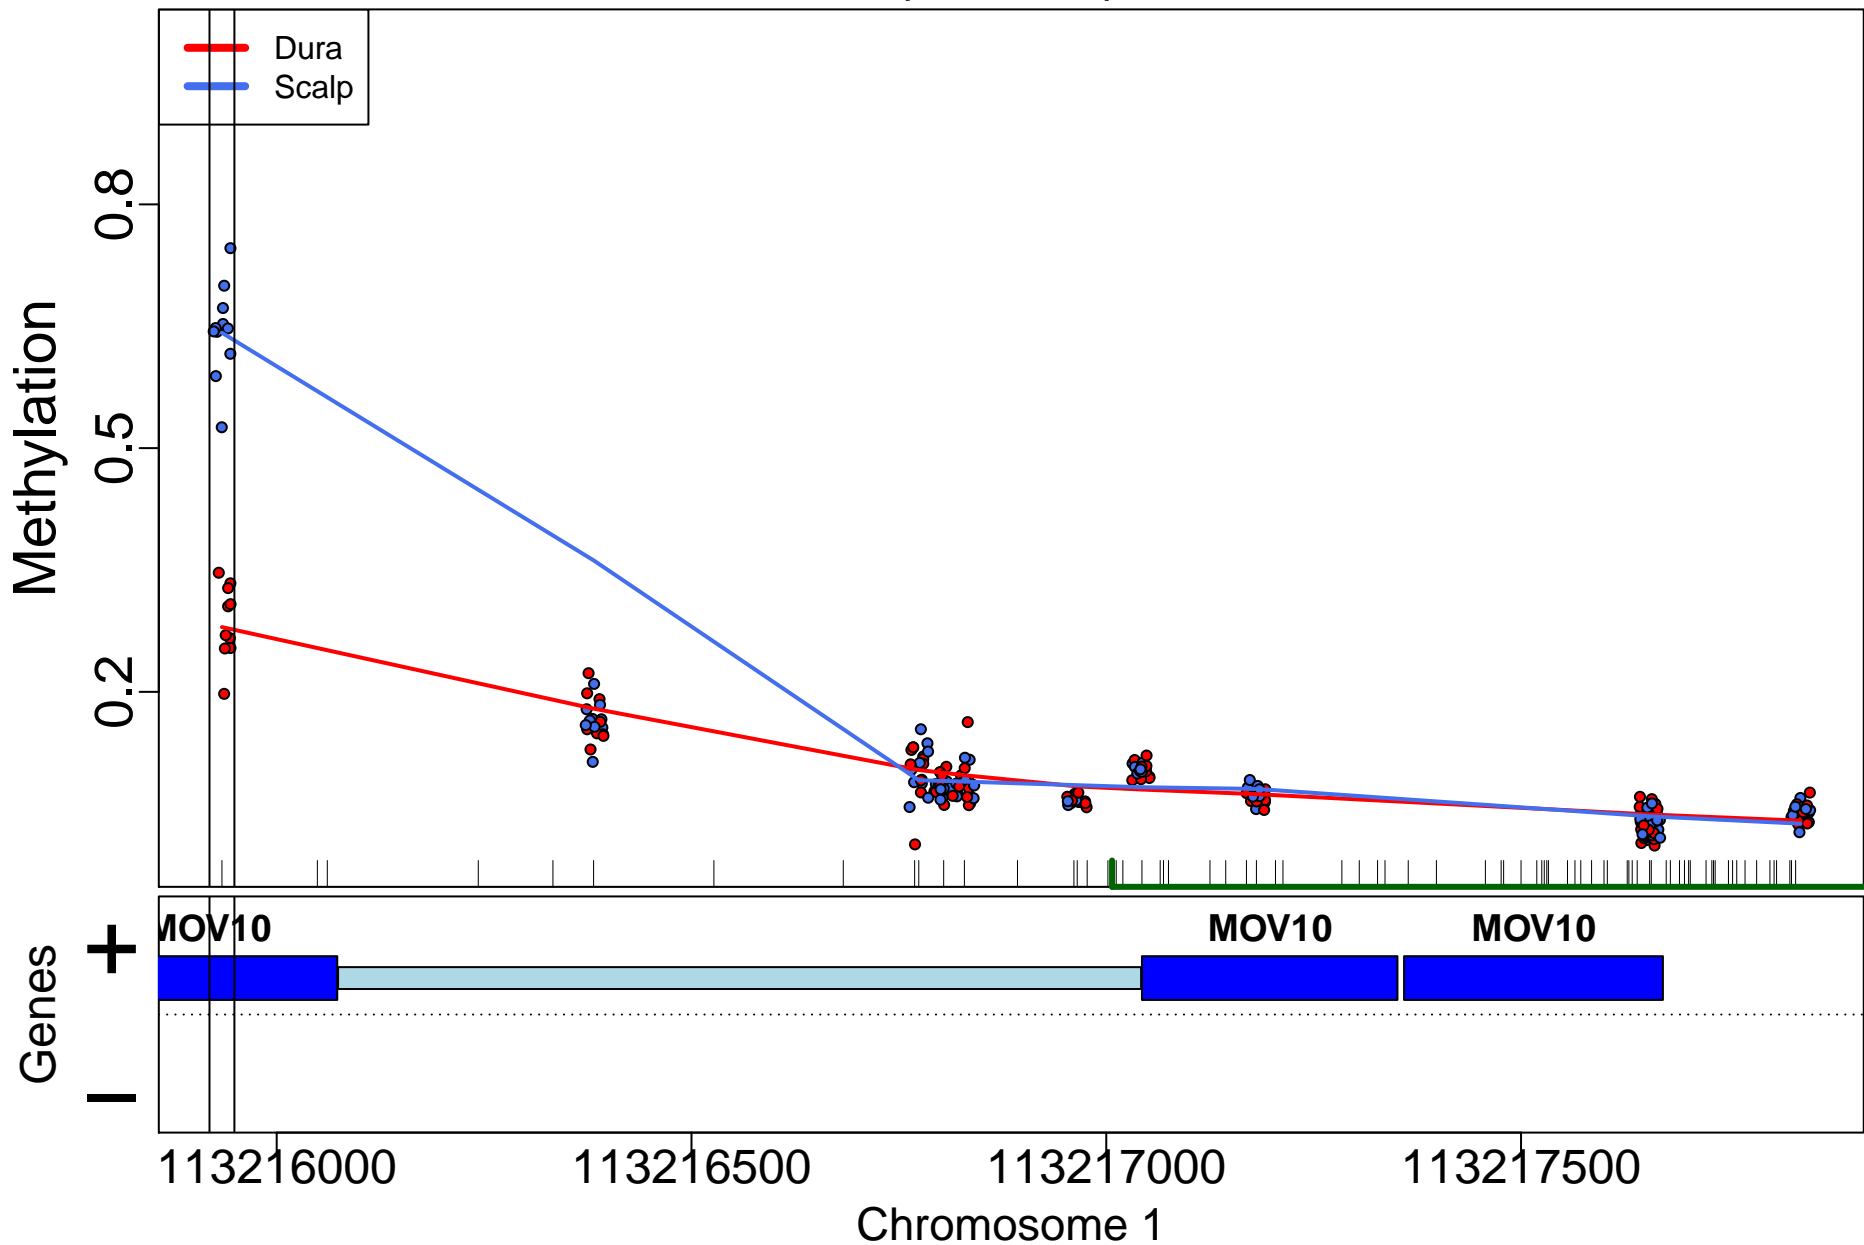

PPP5D1; 104617bp from tss:inside intron

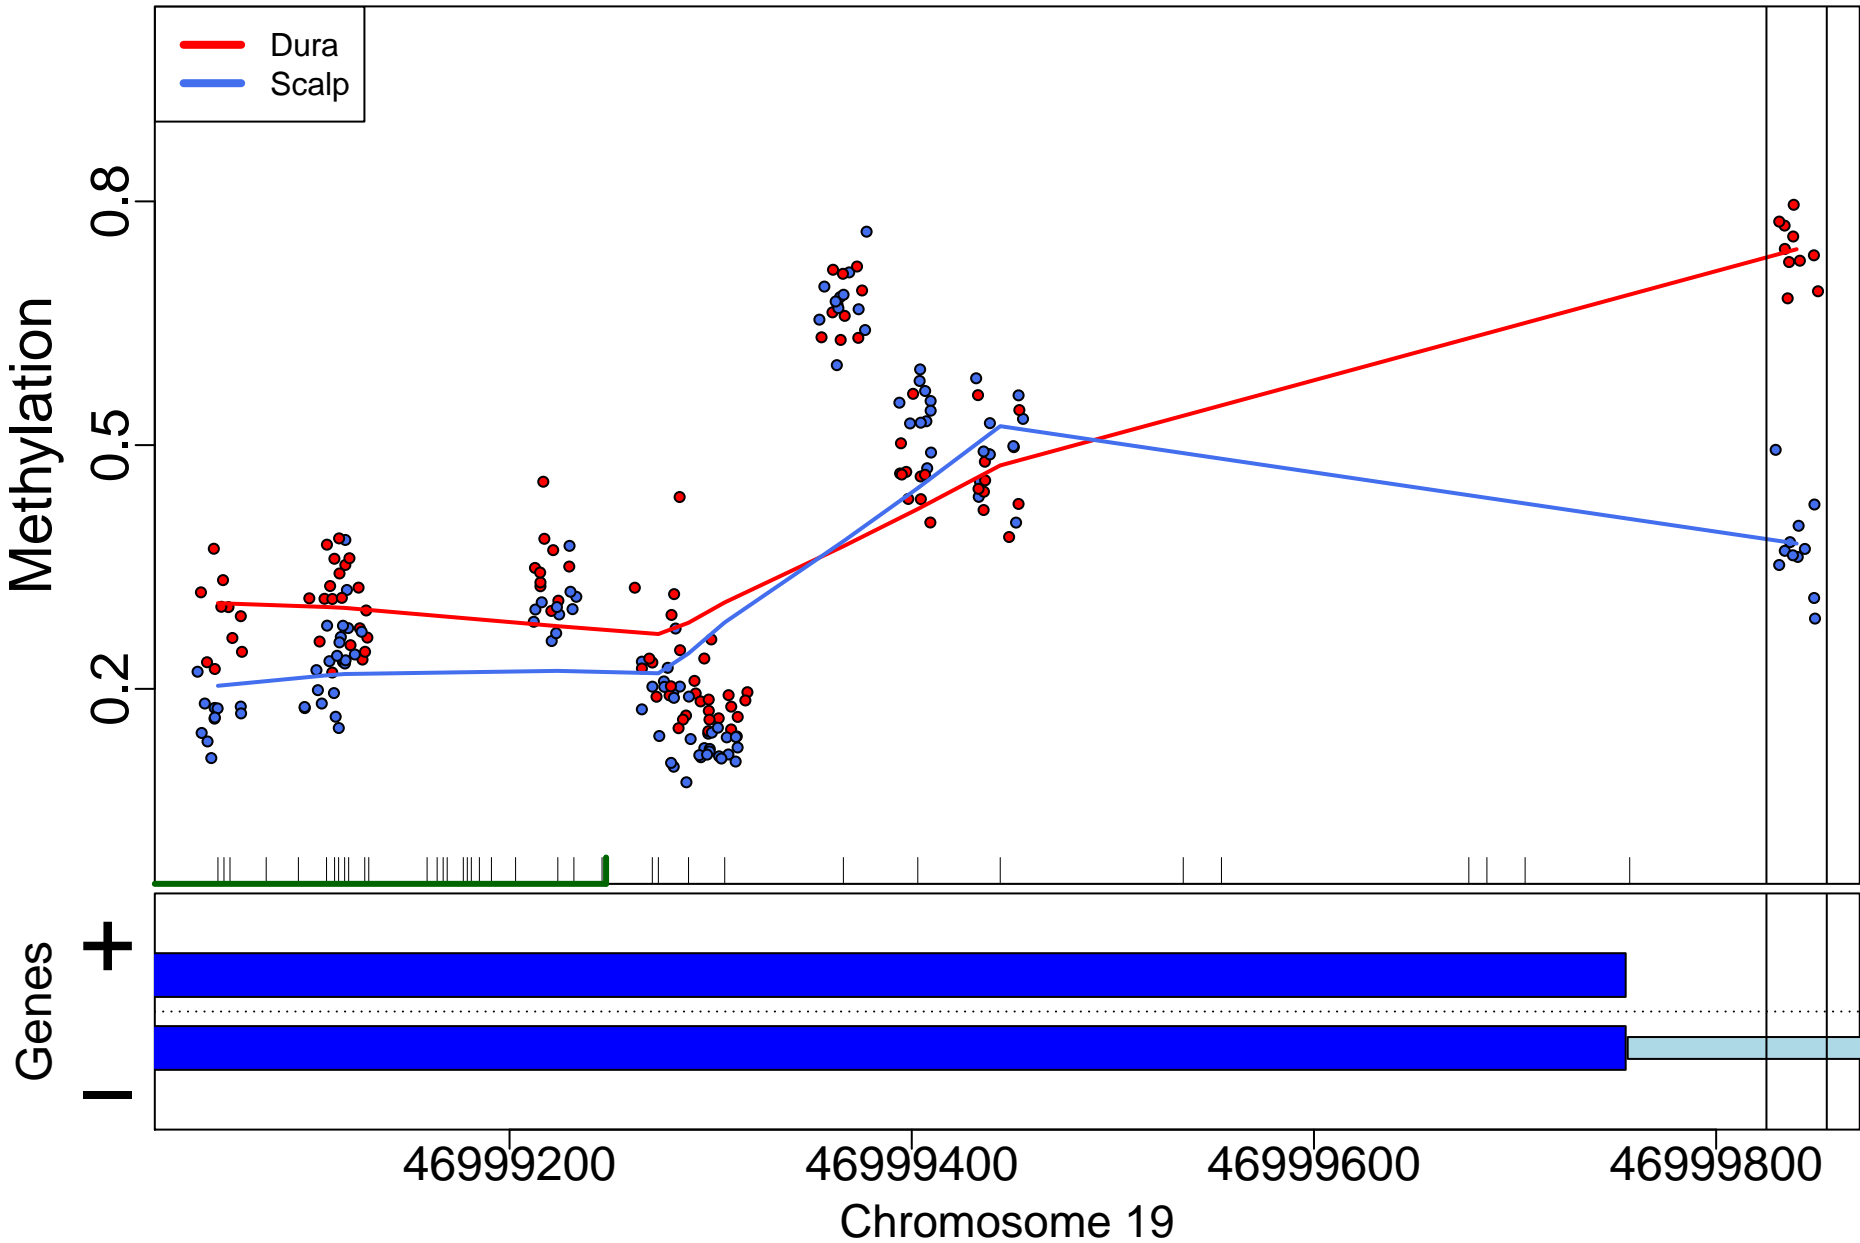

TBX20; 929bp from tss:promoter

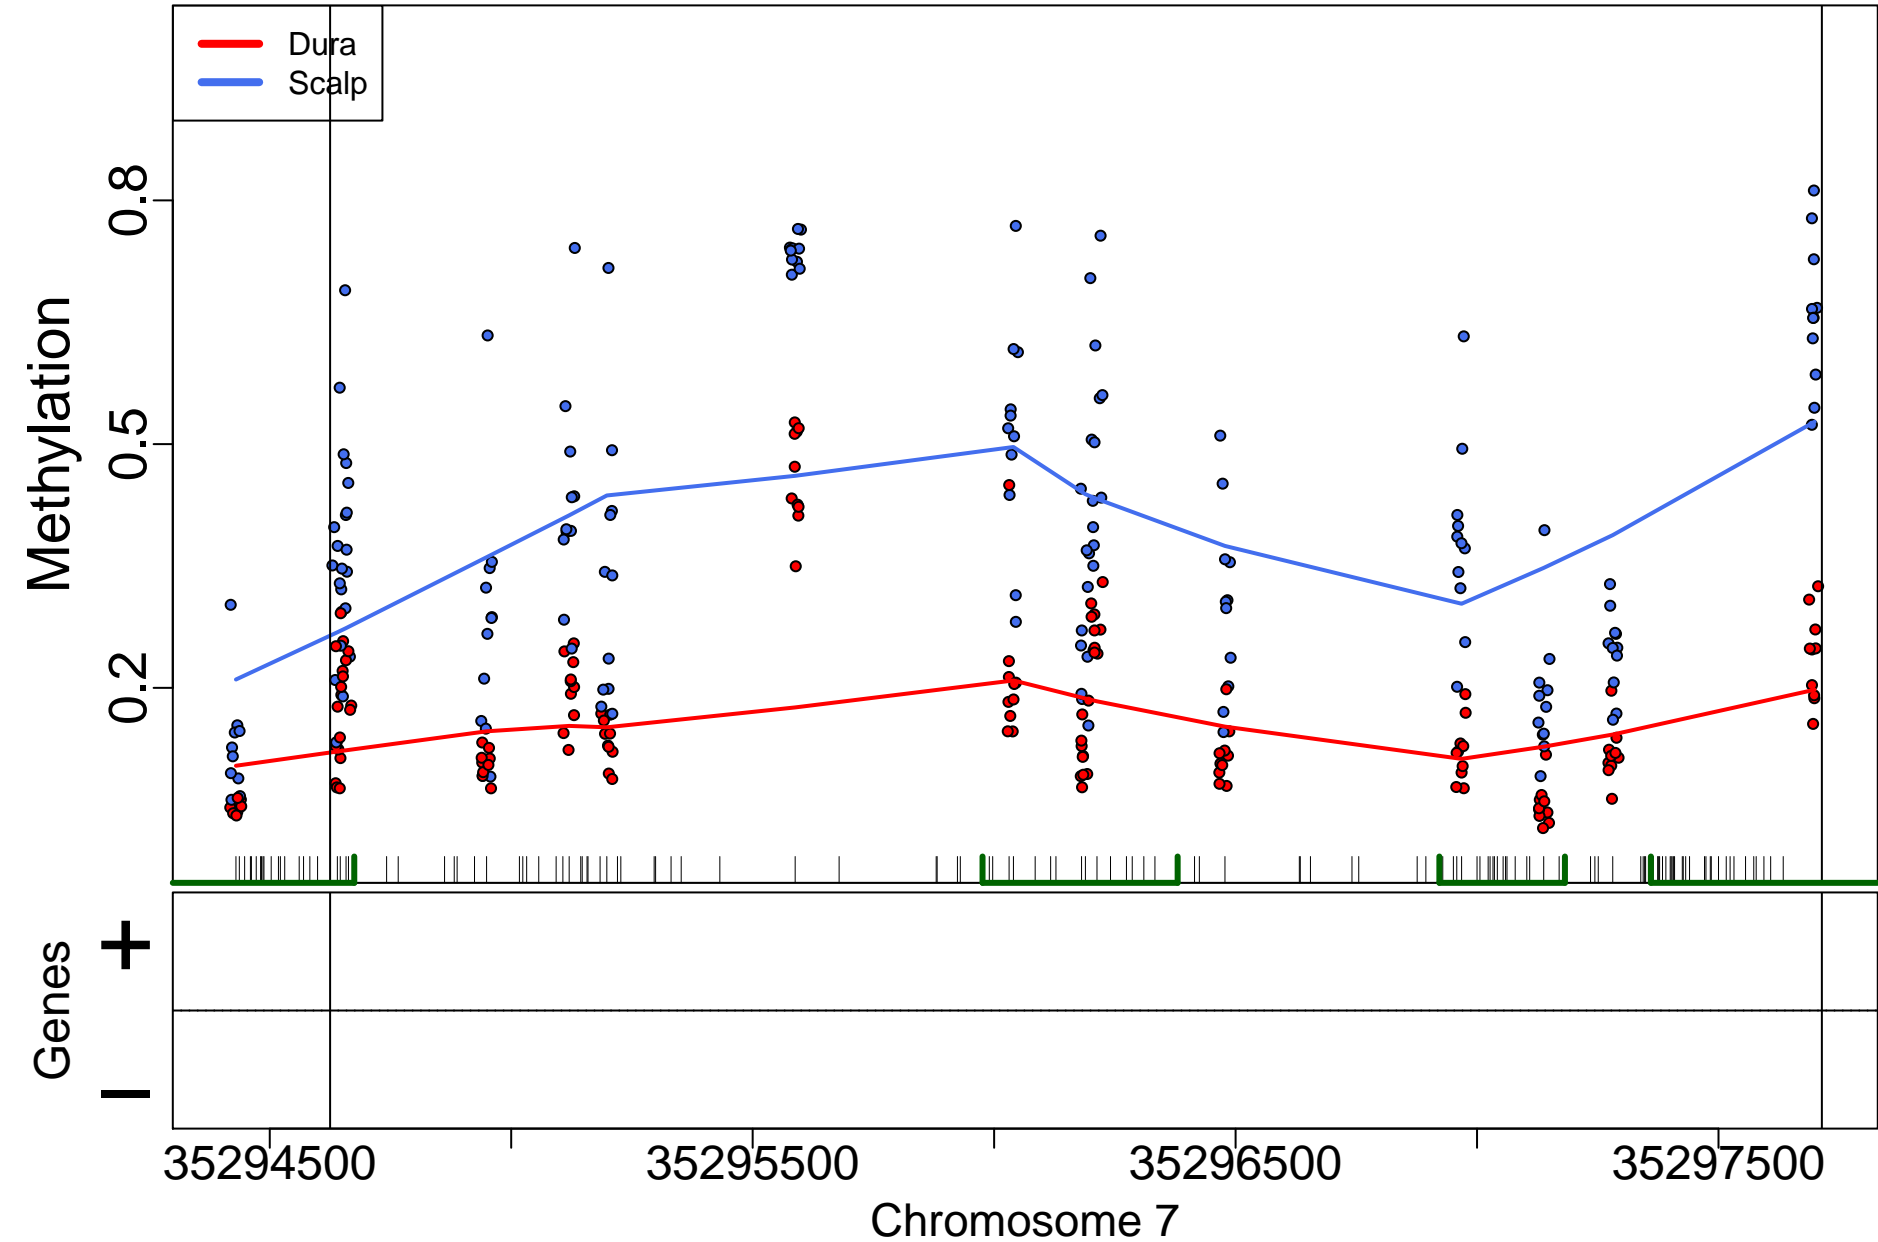

LINC00982; 0bp from tss:overlaps 5'

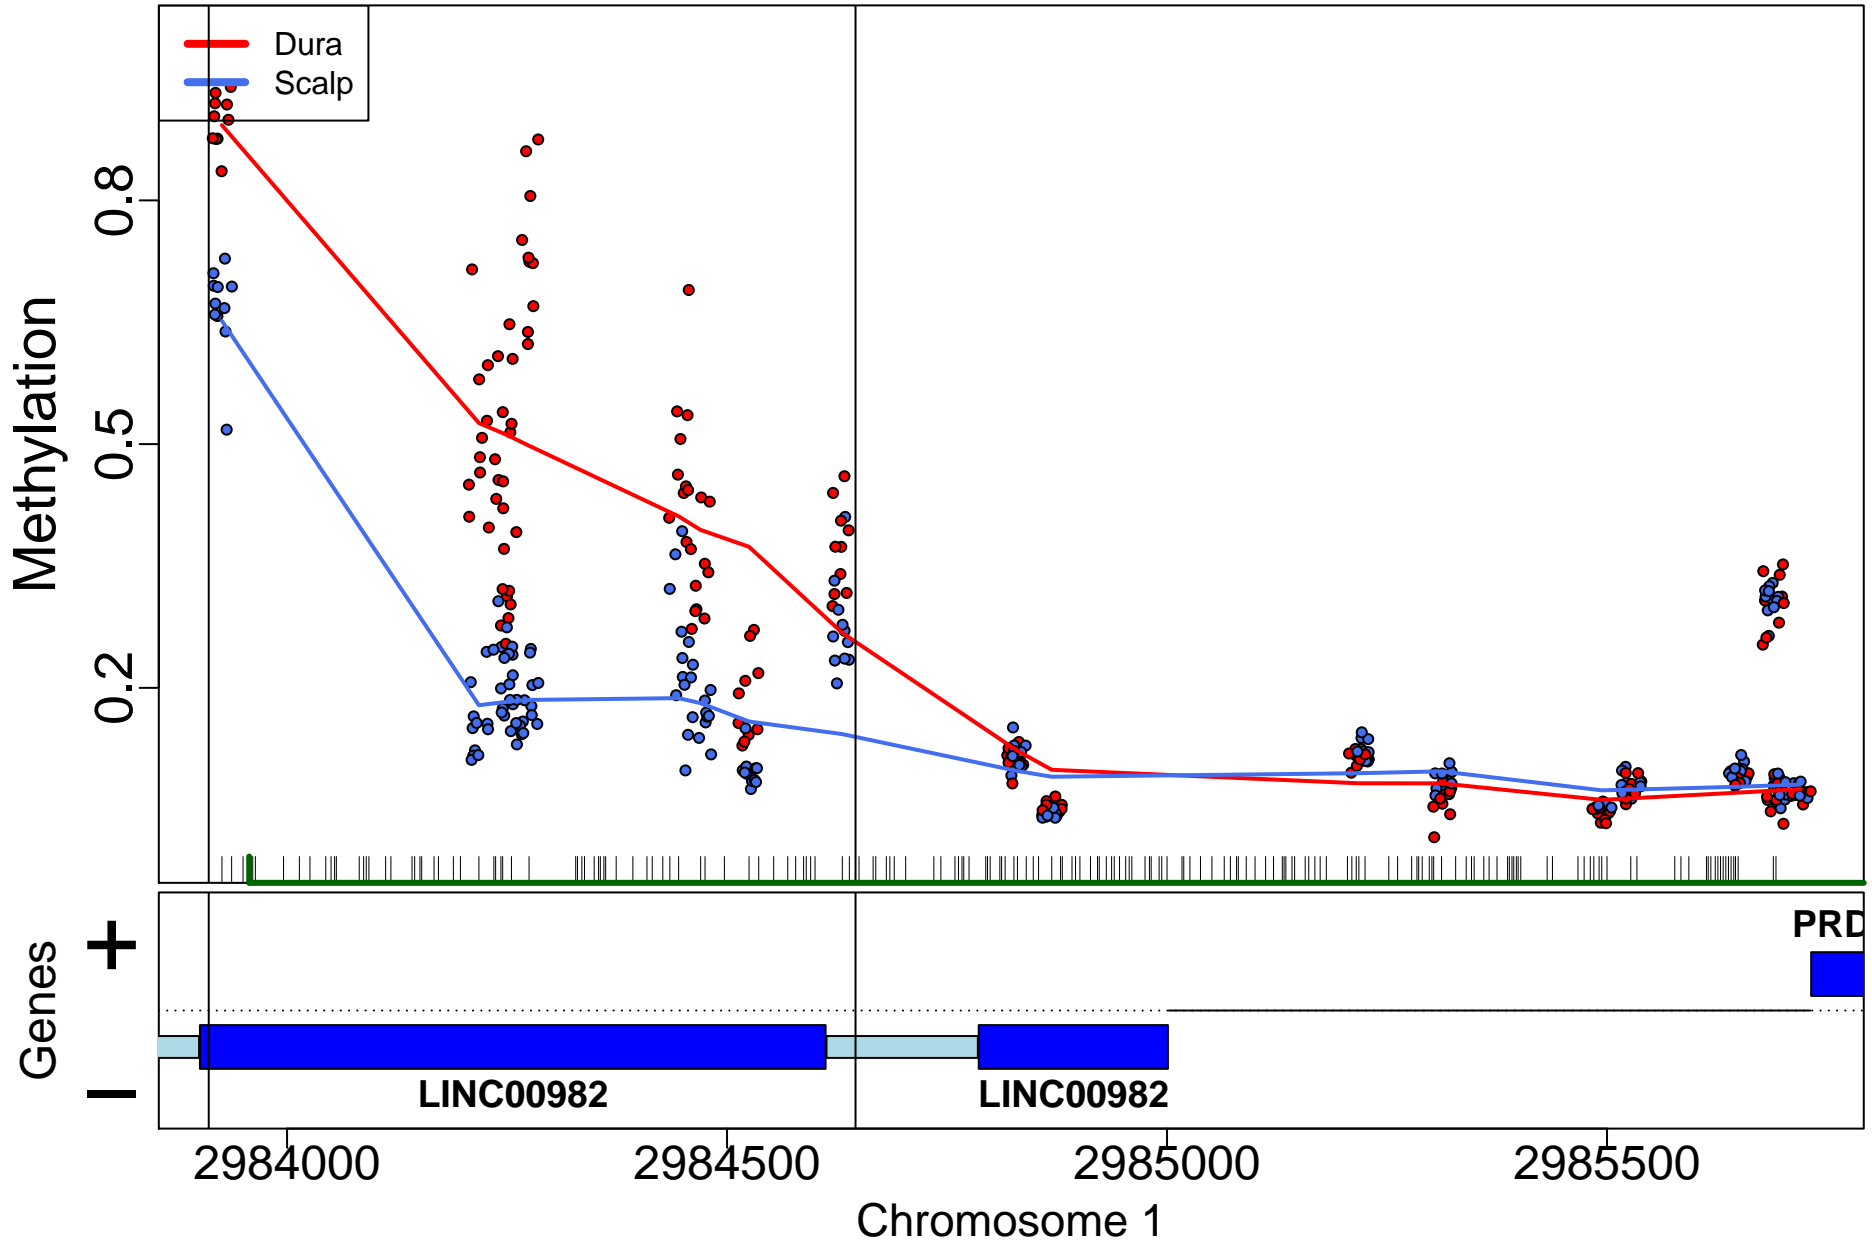

PITX2; 7284bp from tss:downstream

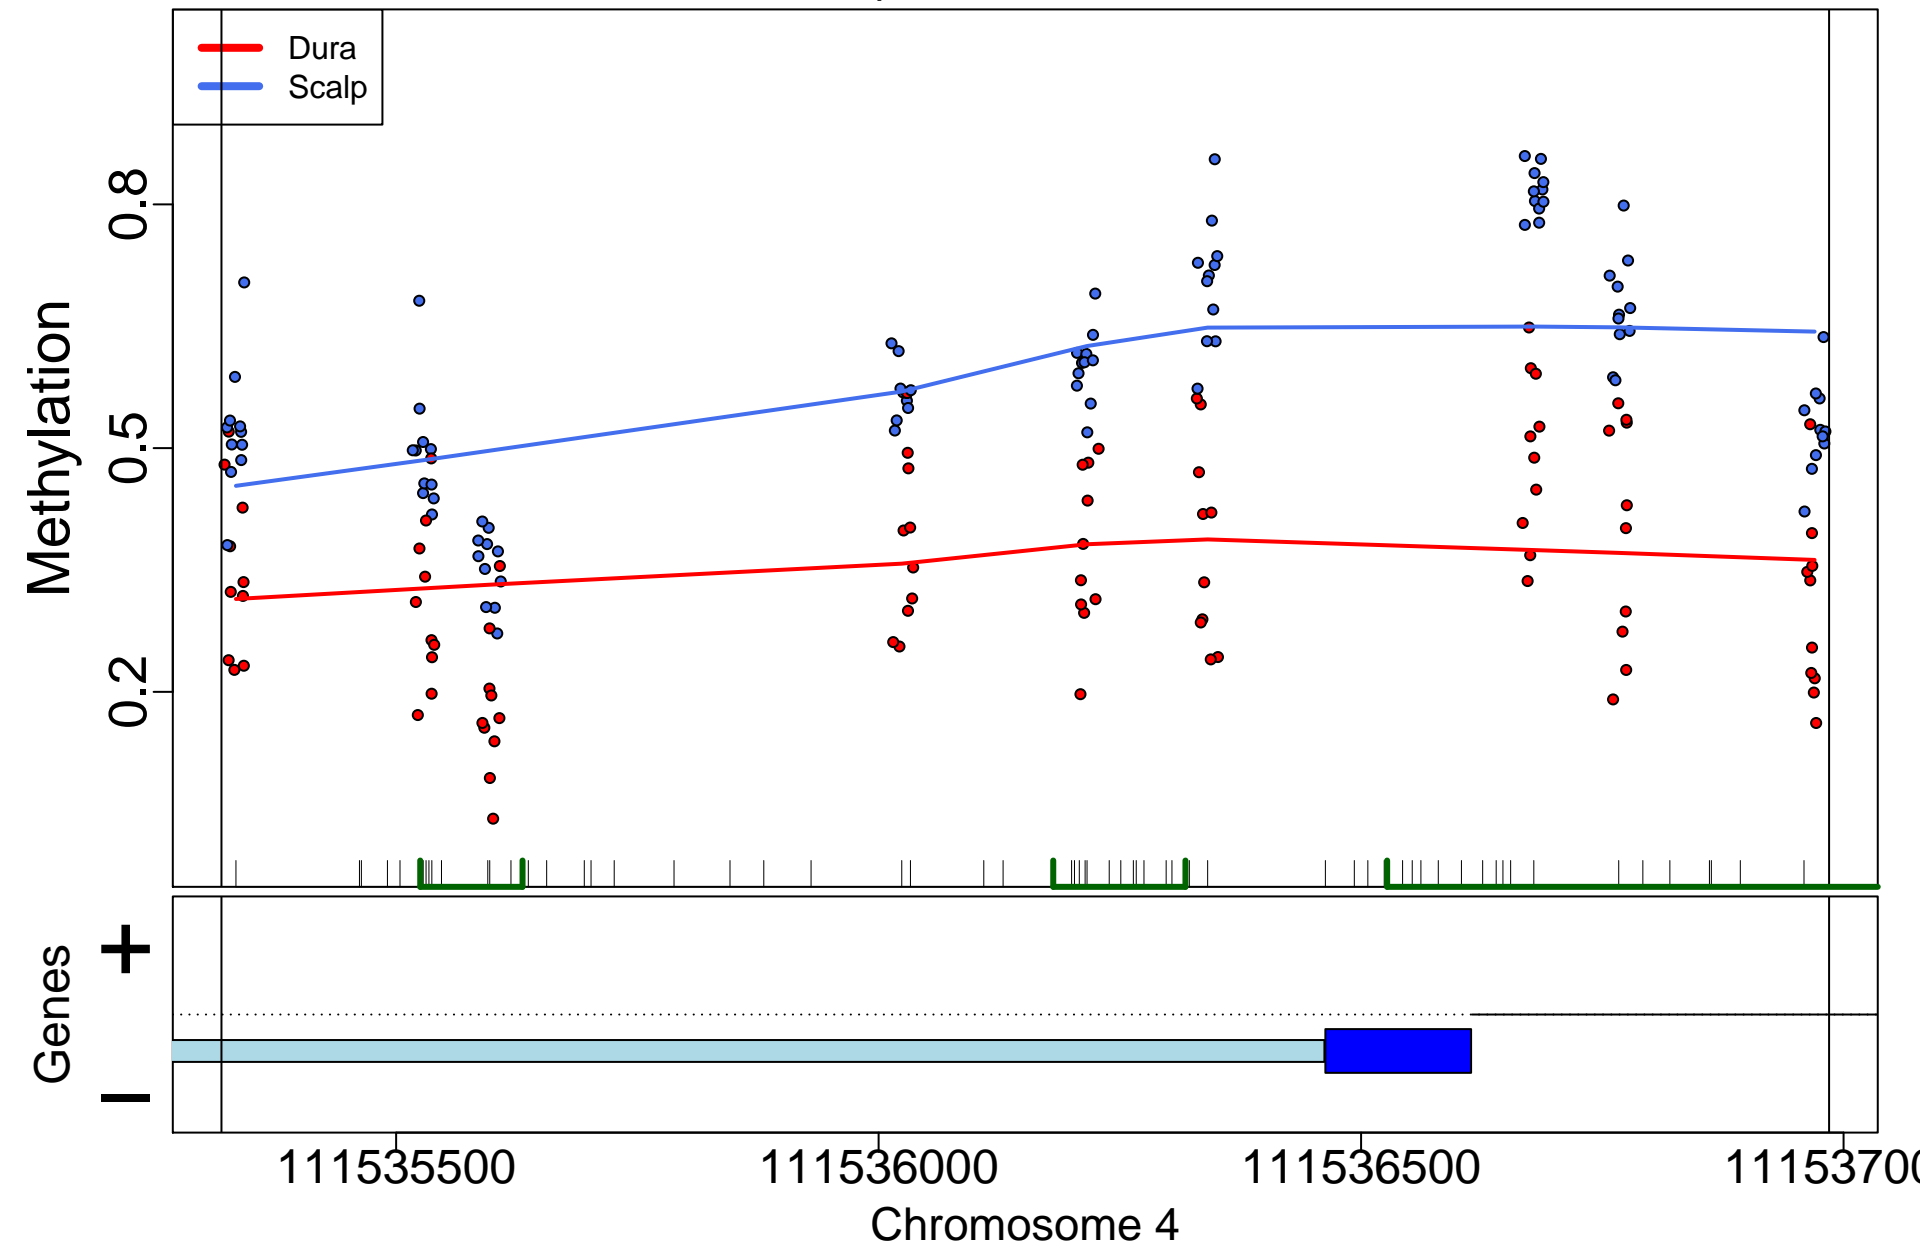

# MCHR2-AS1; 0bp from tss:NA

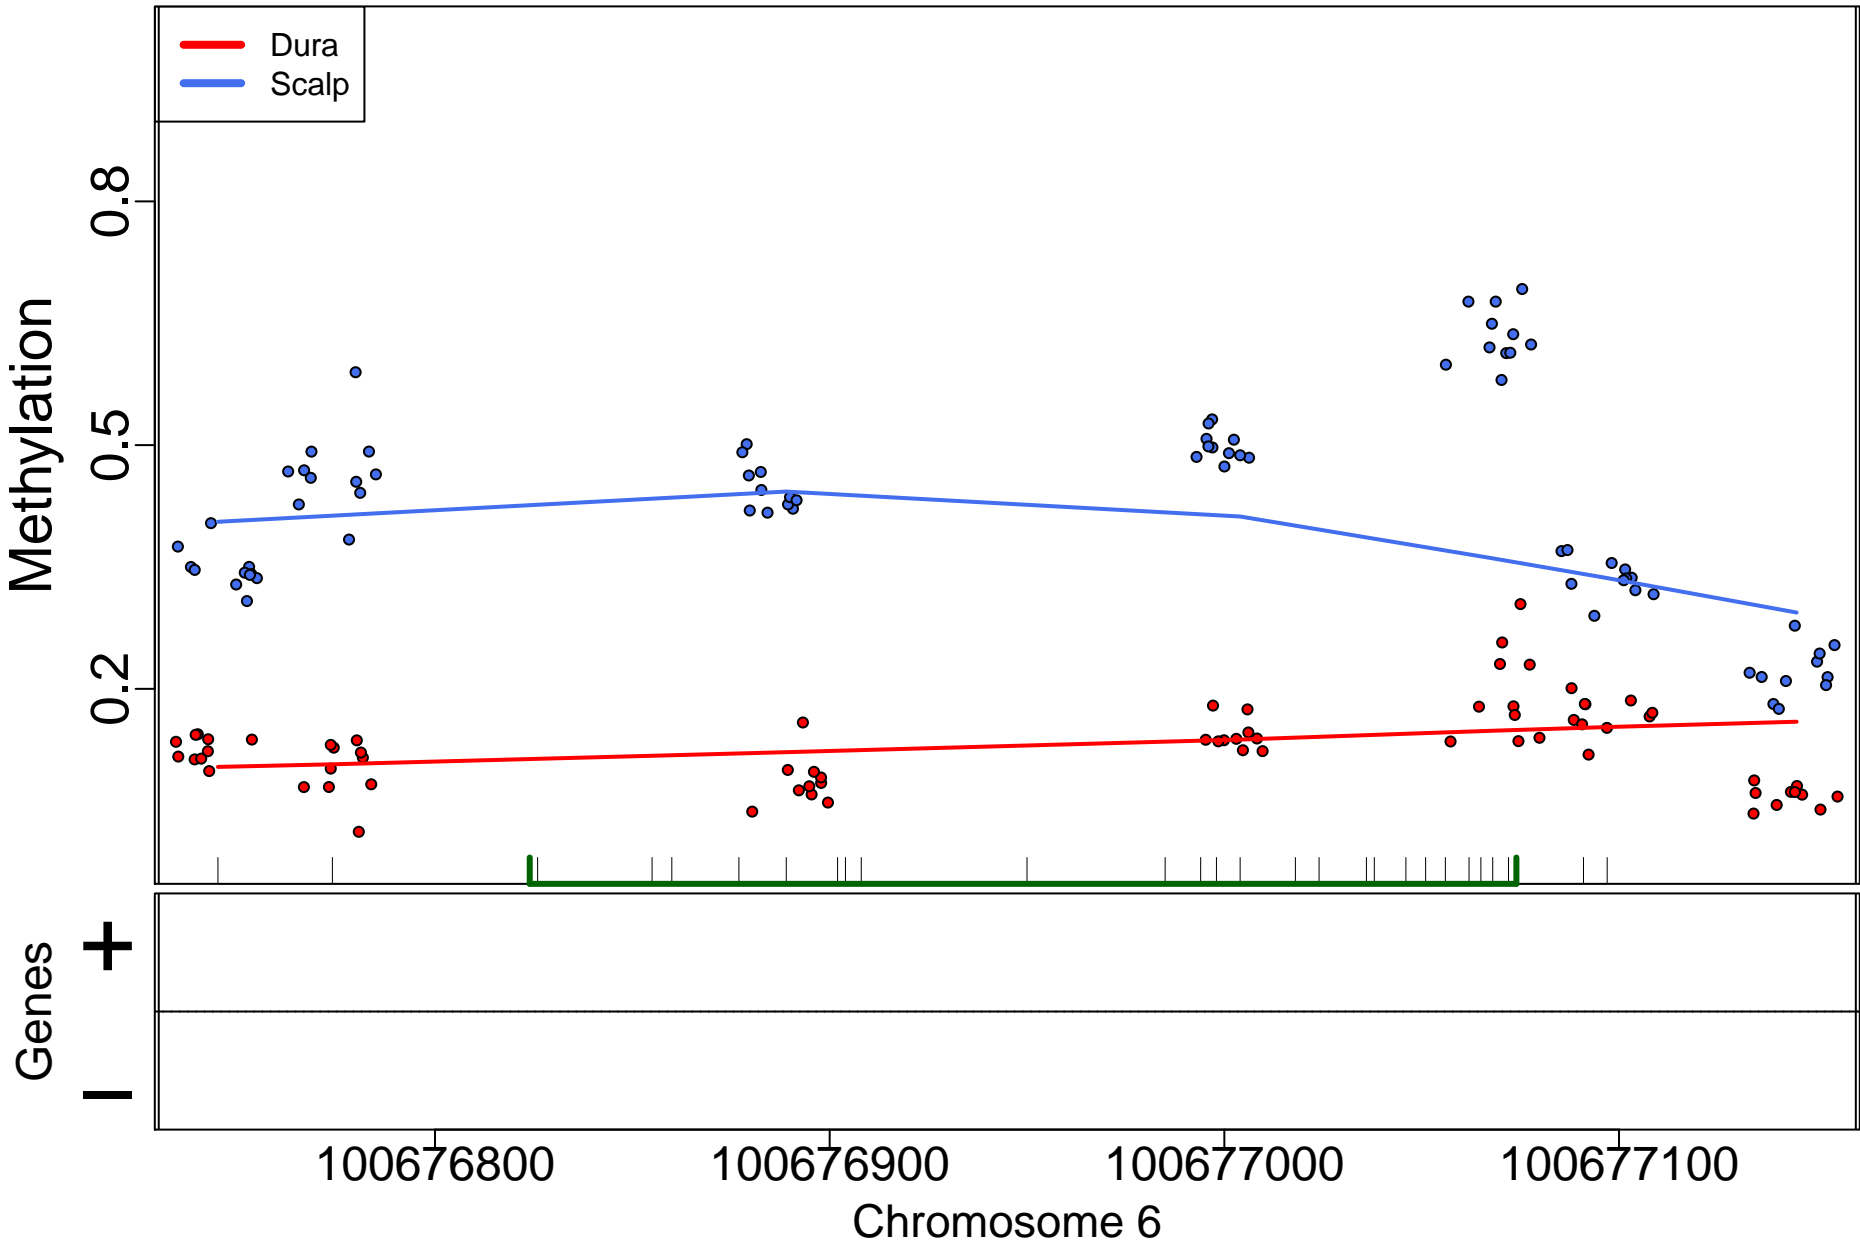

TRAPPC12; 60956bp from tss:inside intron

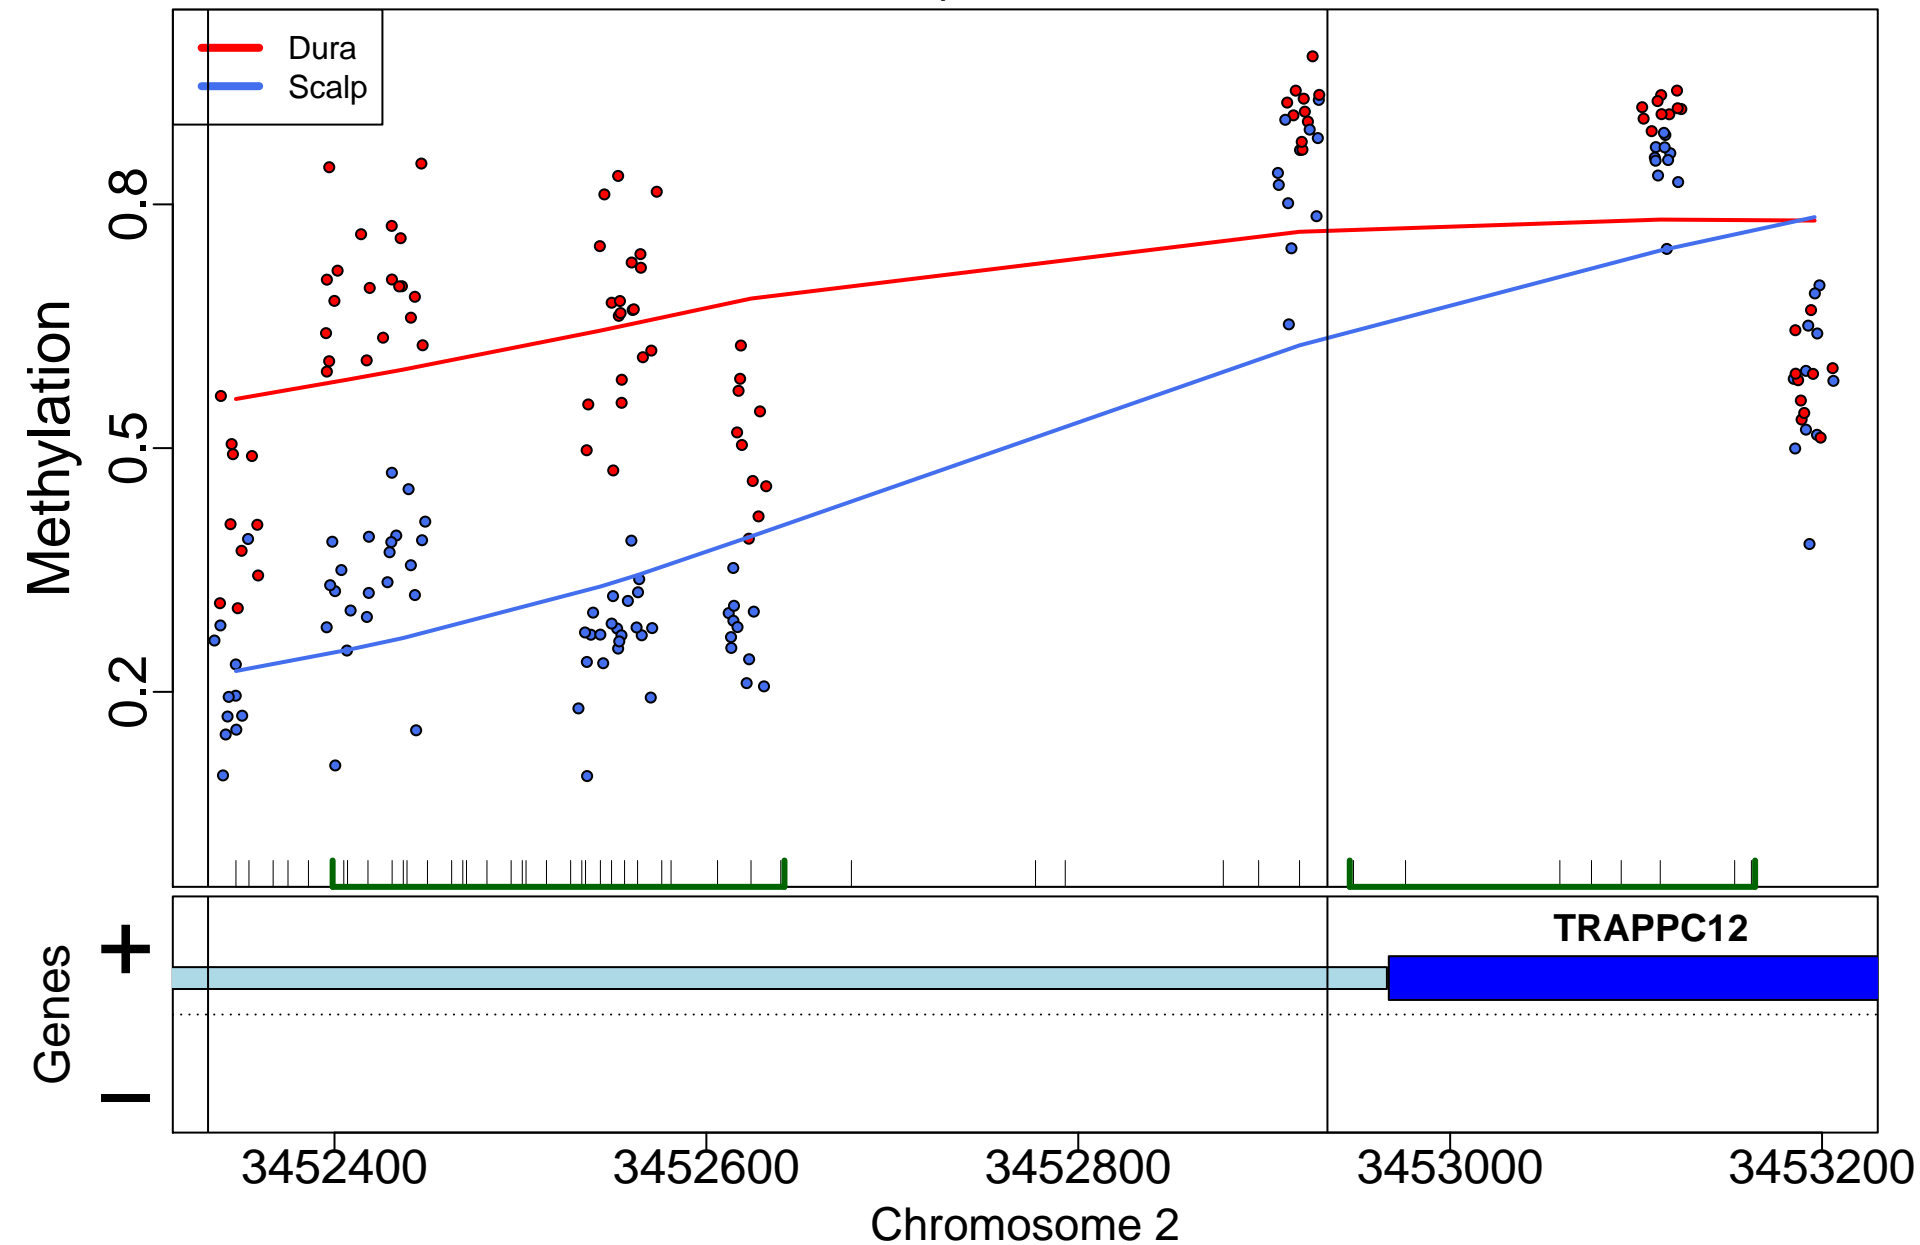

SDK1; 41632bp from tss:inside intron

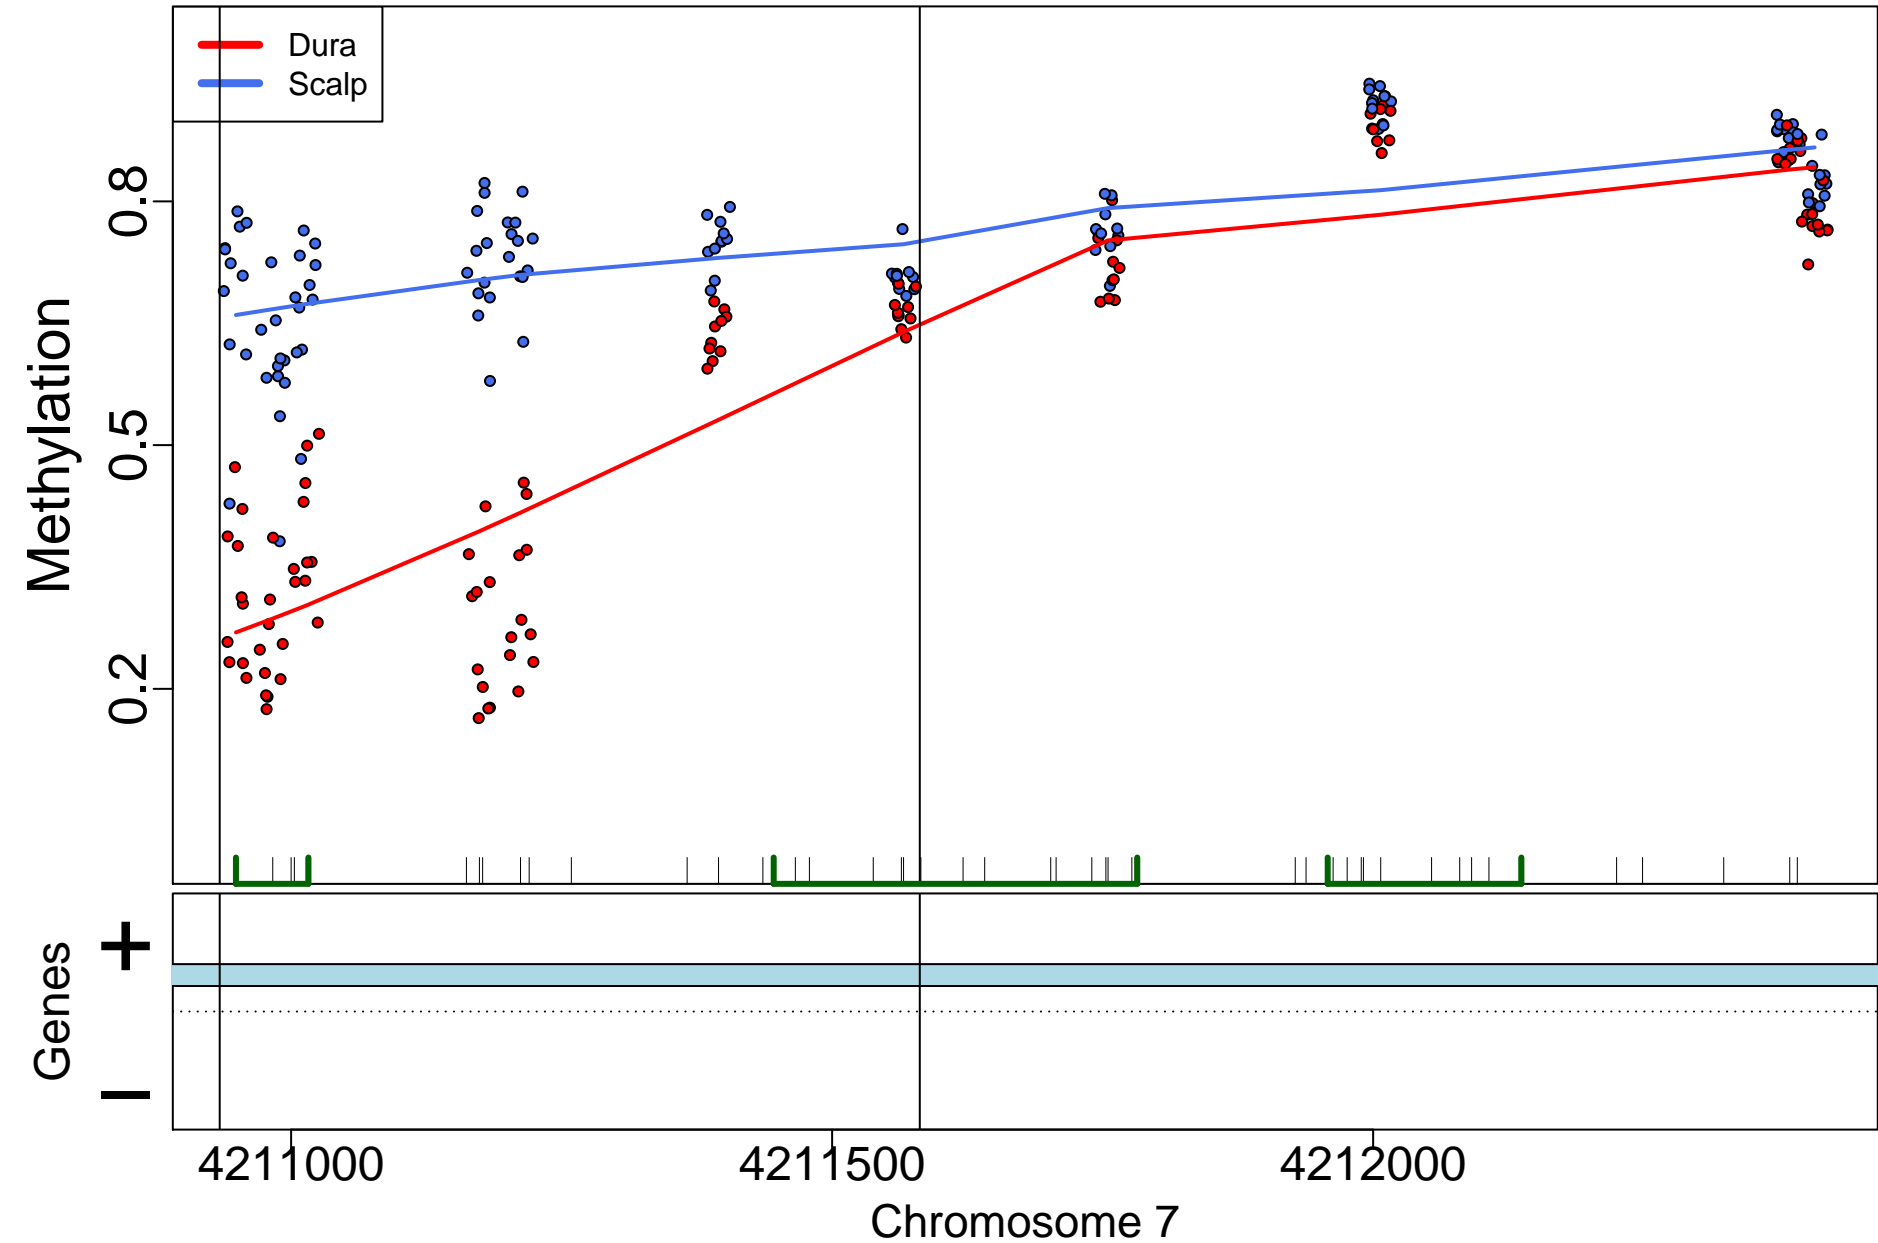



ALPK2; 0bp from tss:overlaps 5'

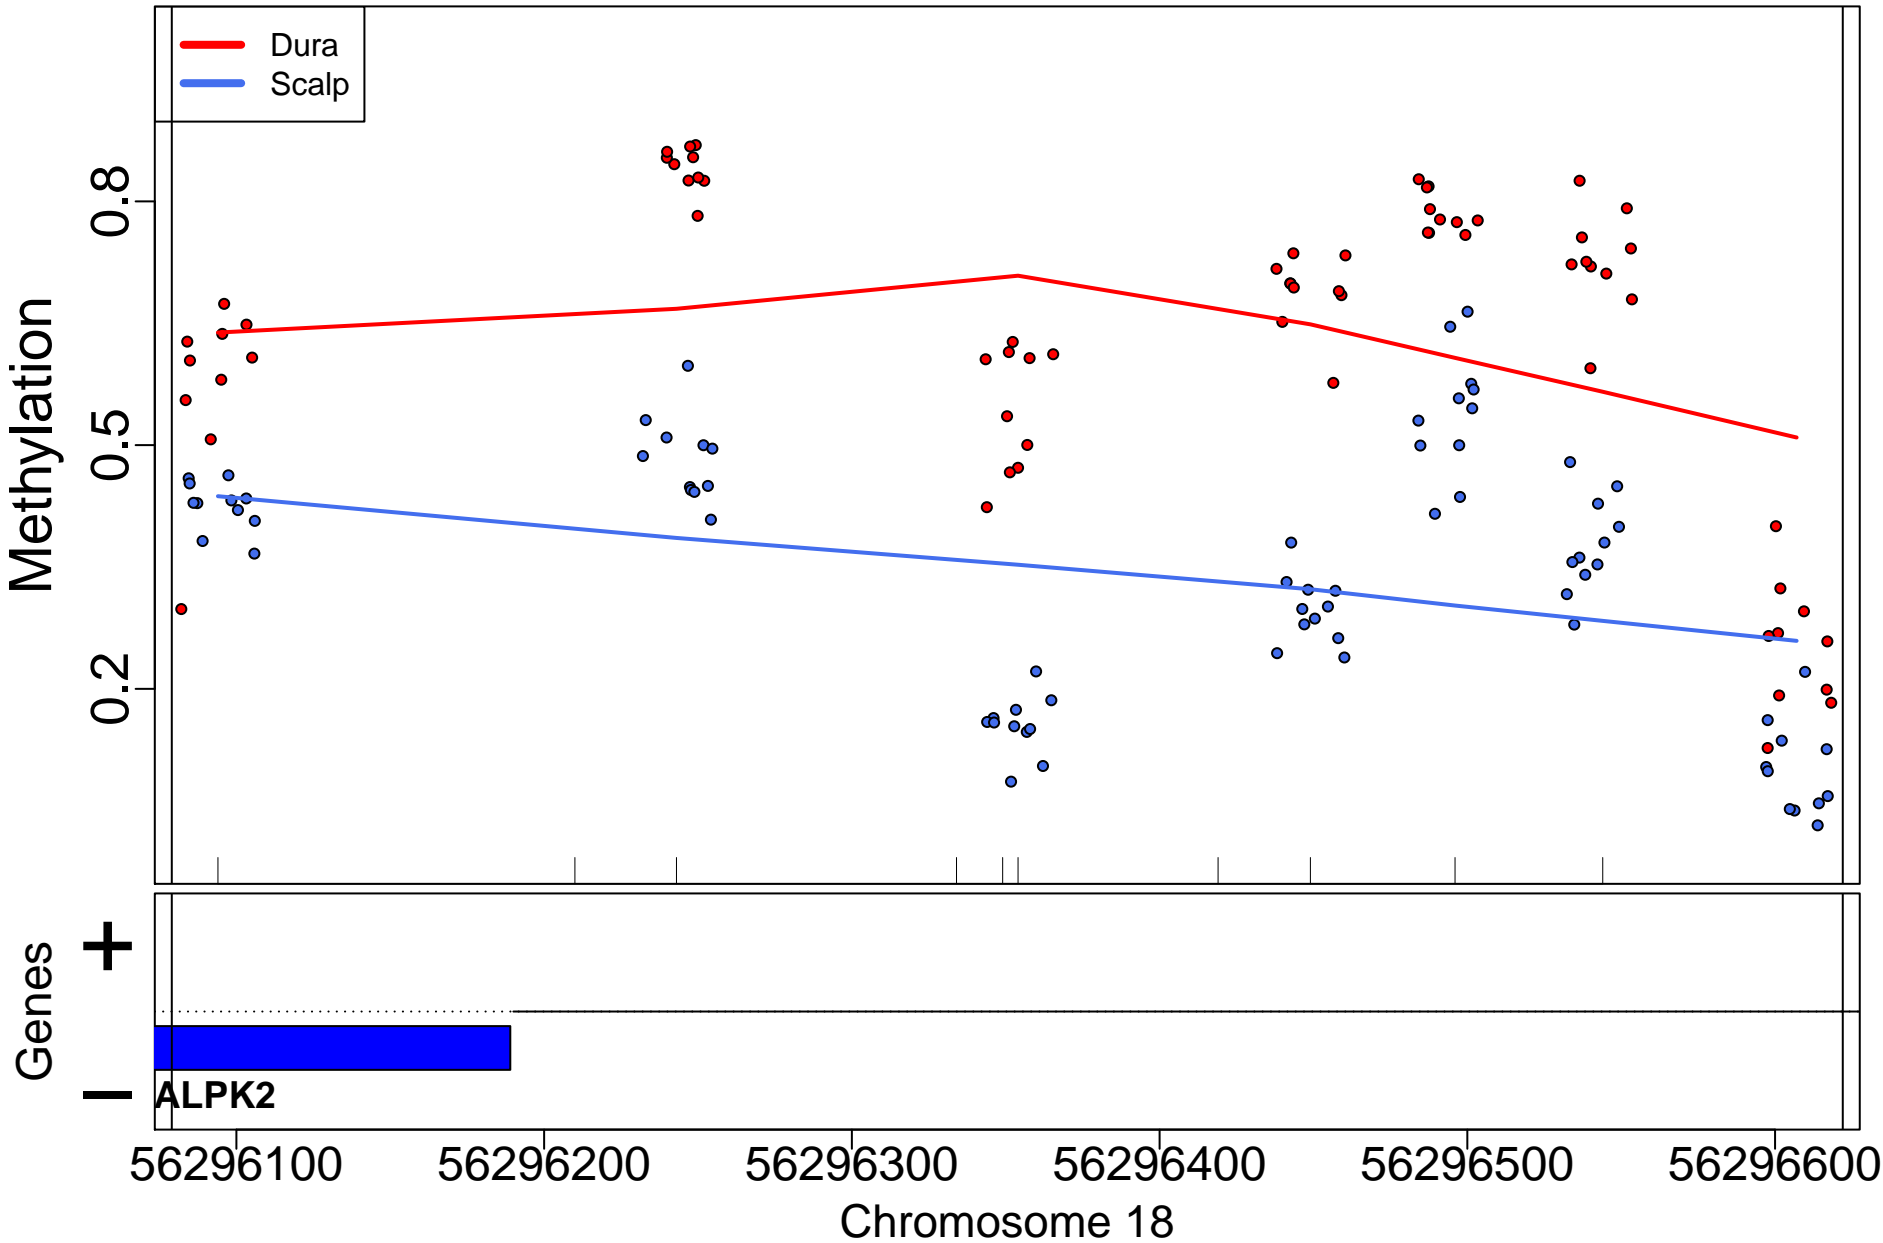

CIR1; 51188bp from tss:downstream

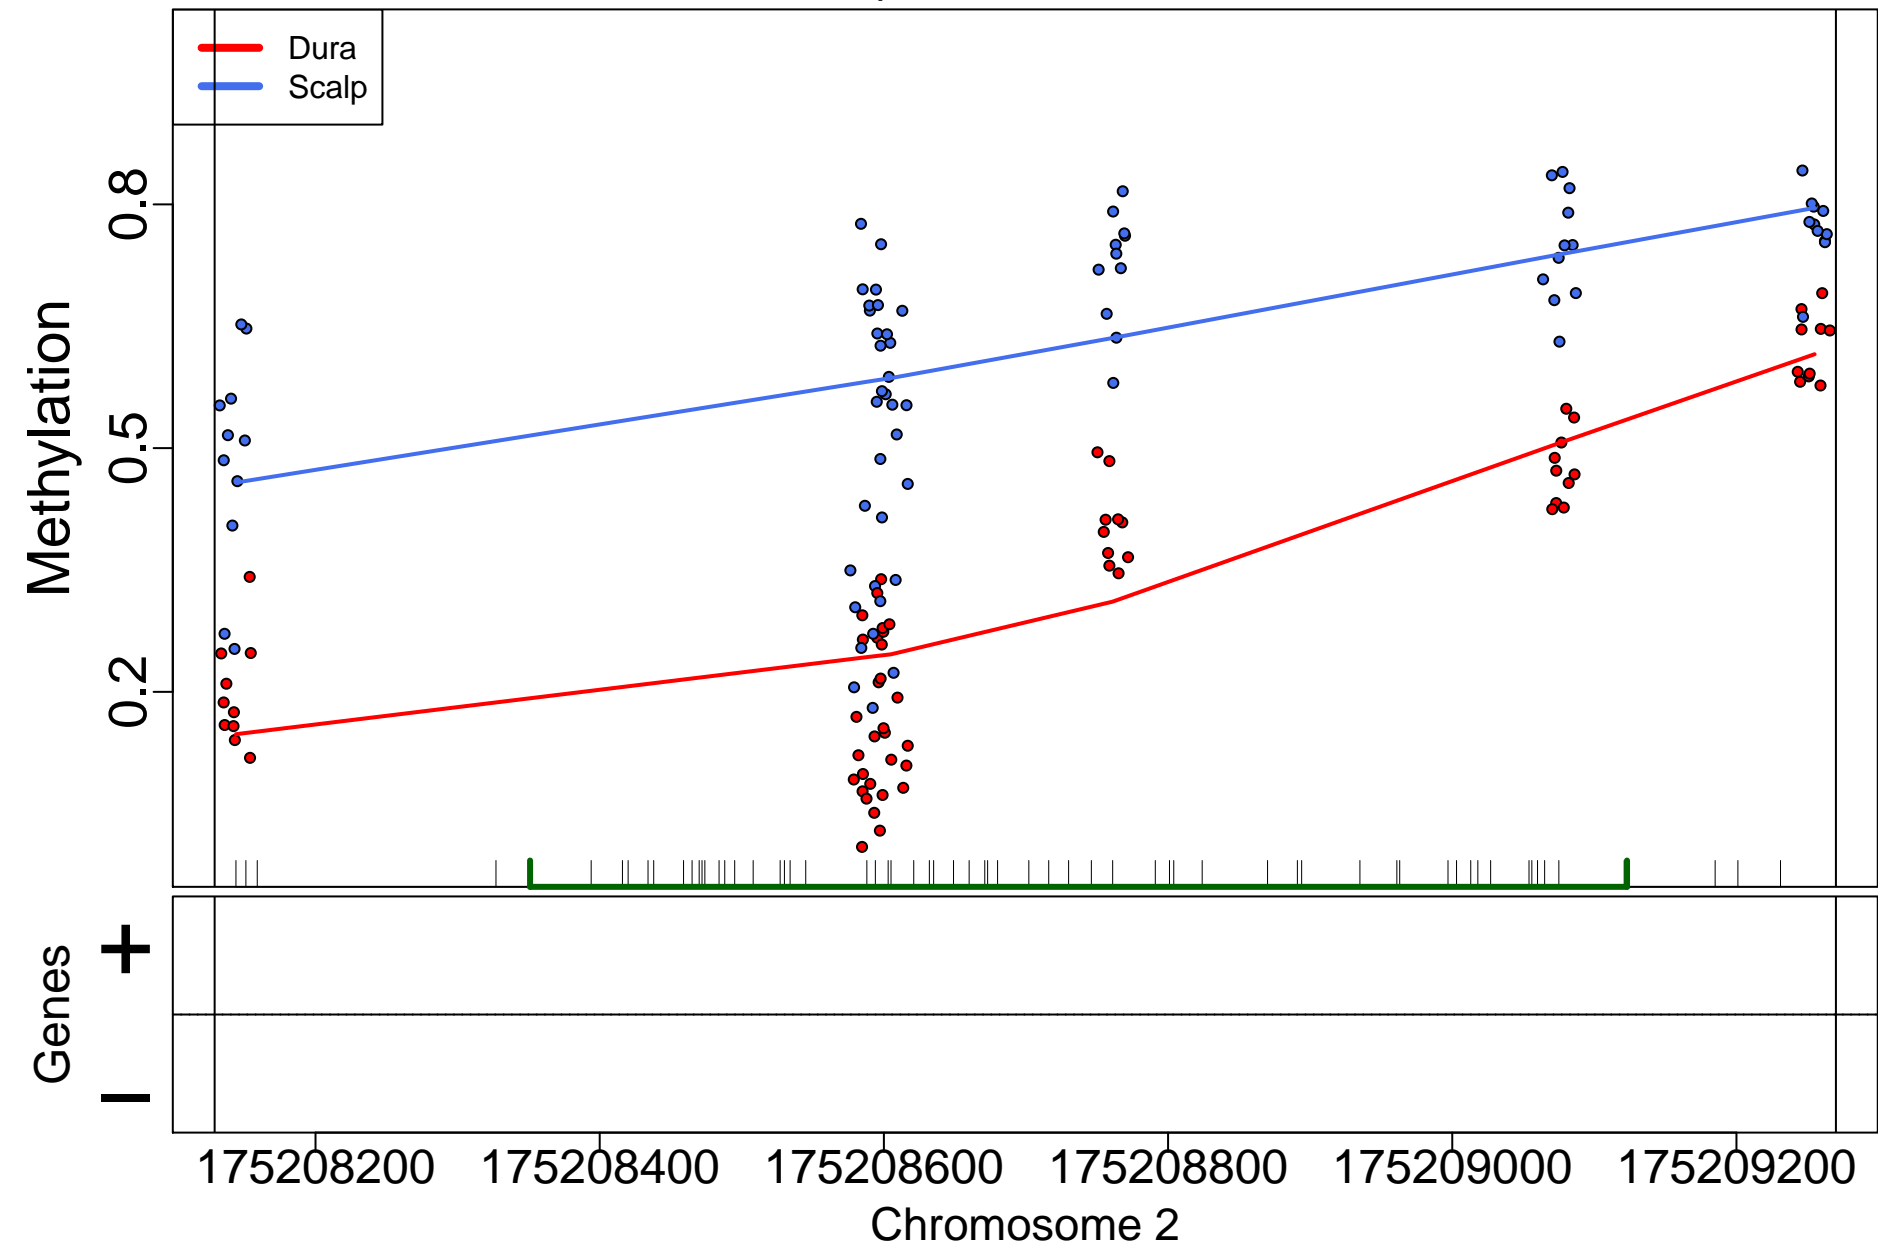

CD248; 352bp from tss:inside exon

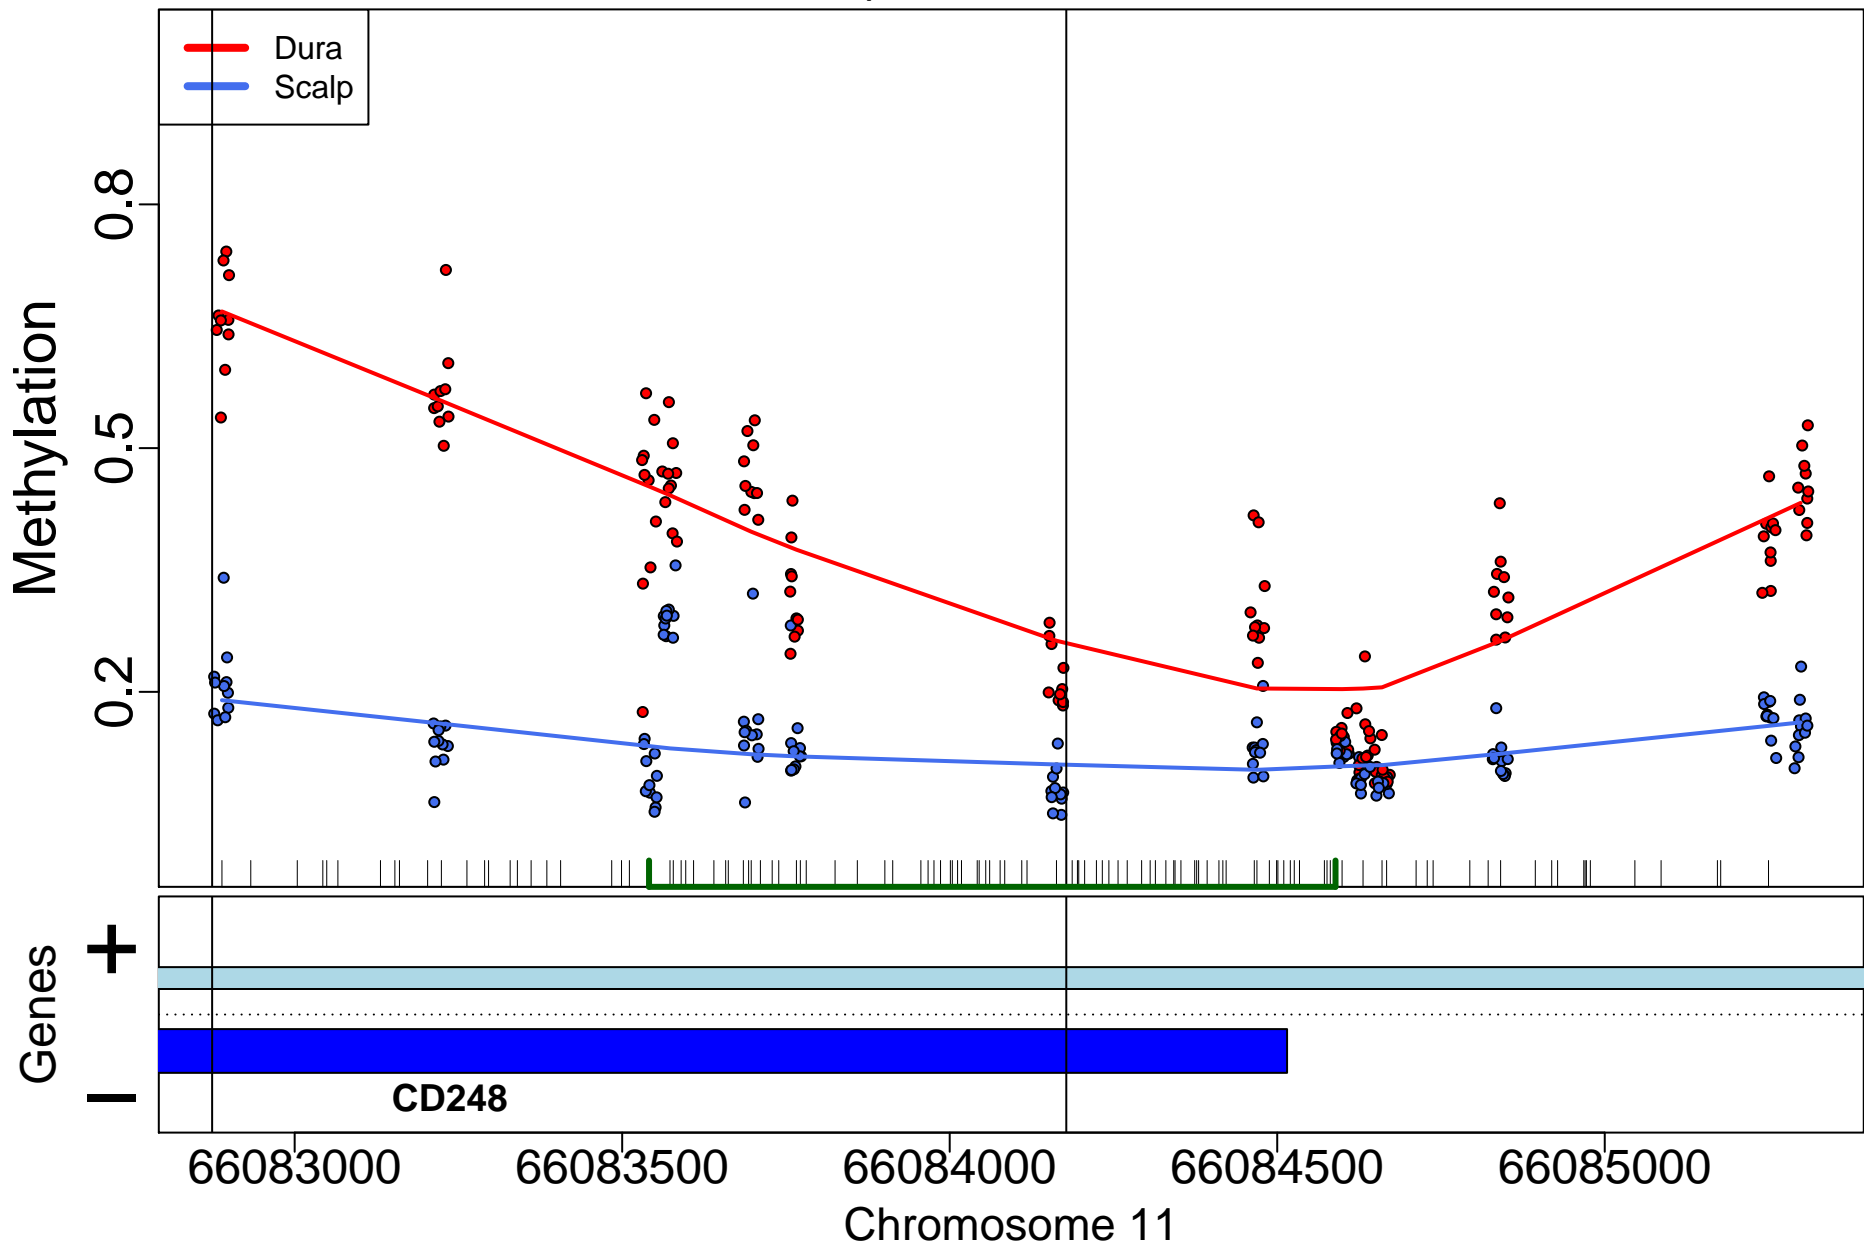

GLI2; 0bp from tss:overlaps 5'

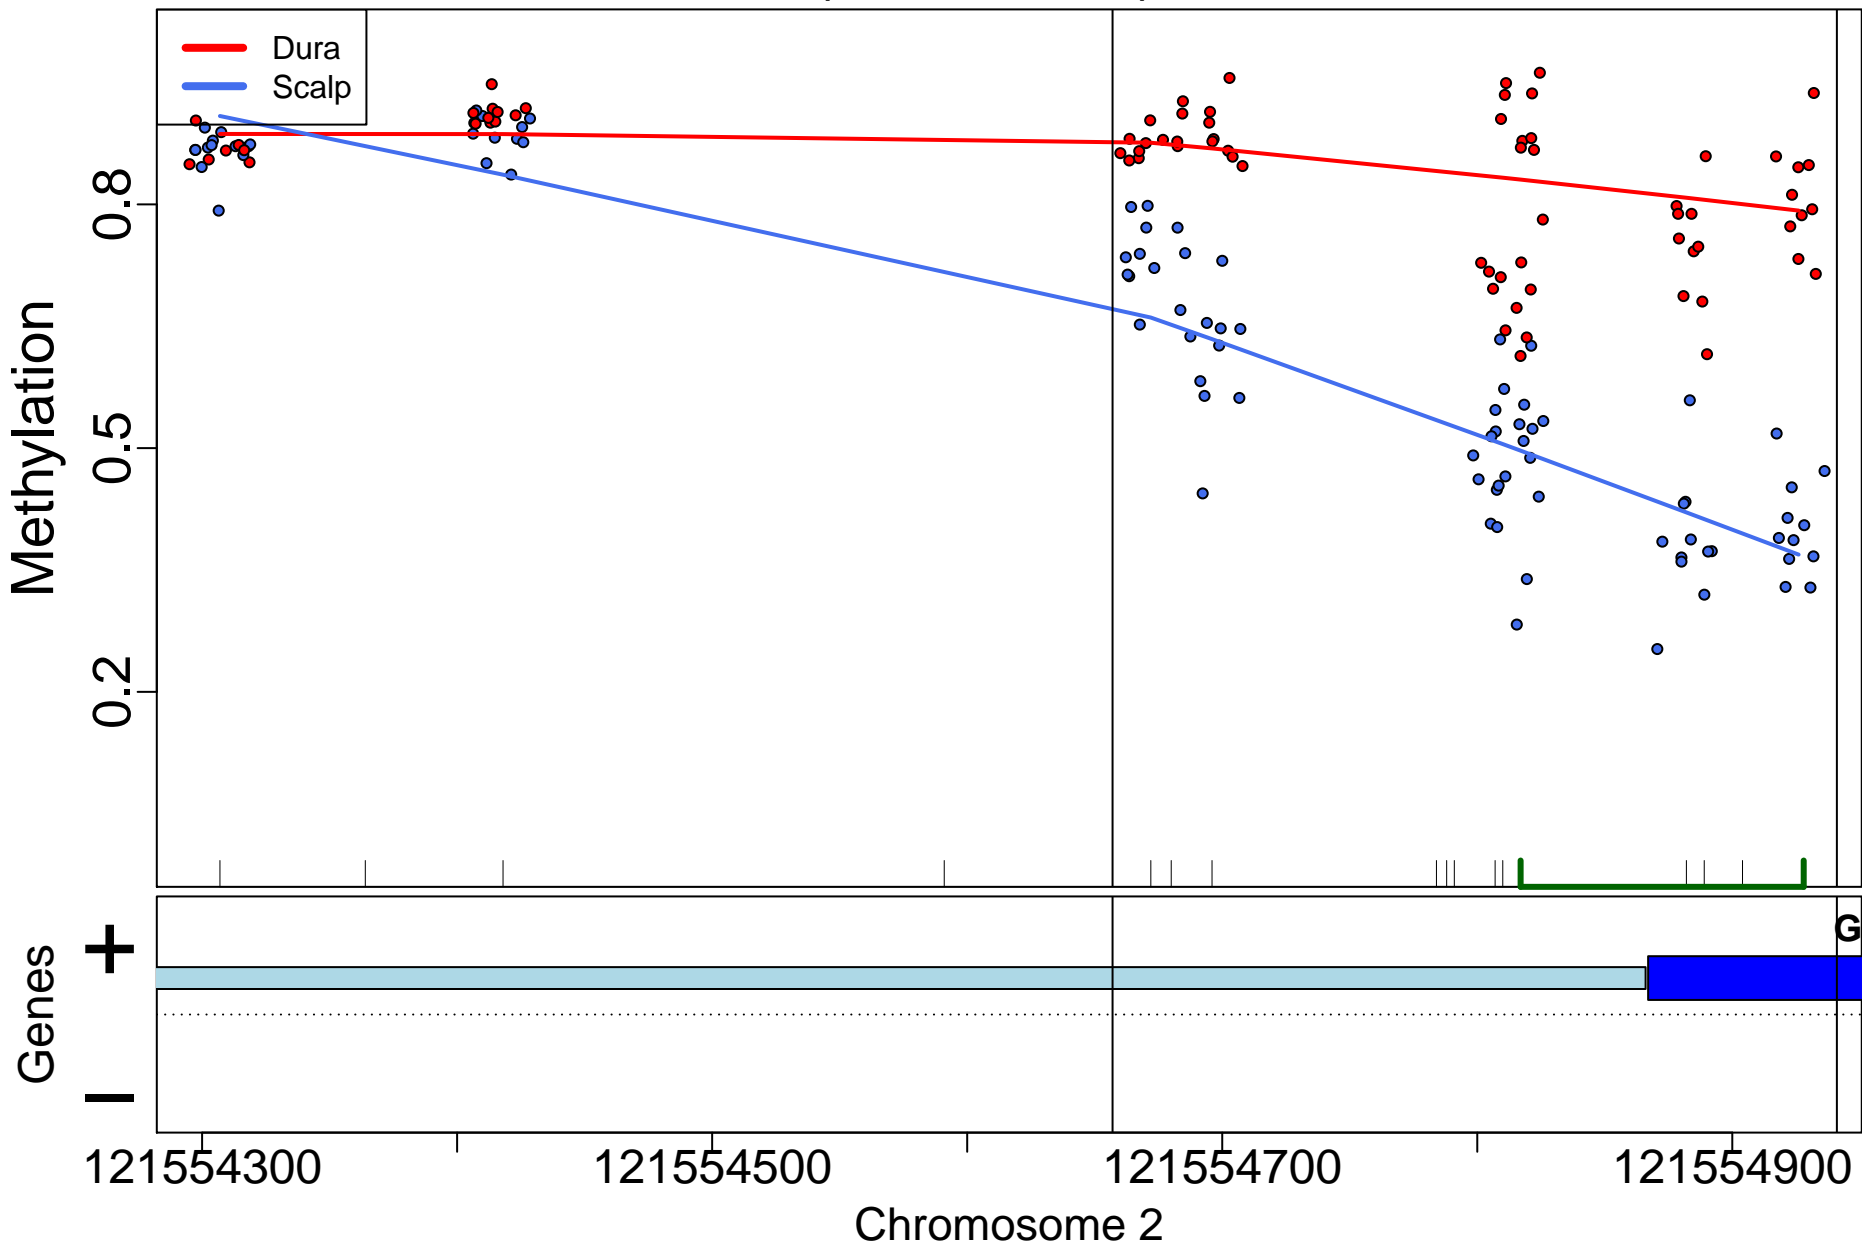

MAFB; 2656bp from tss:upstream

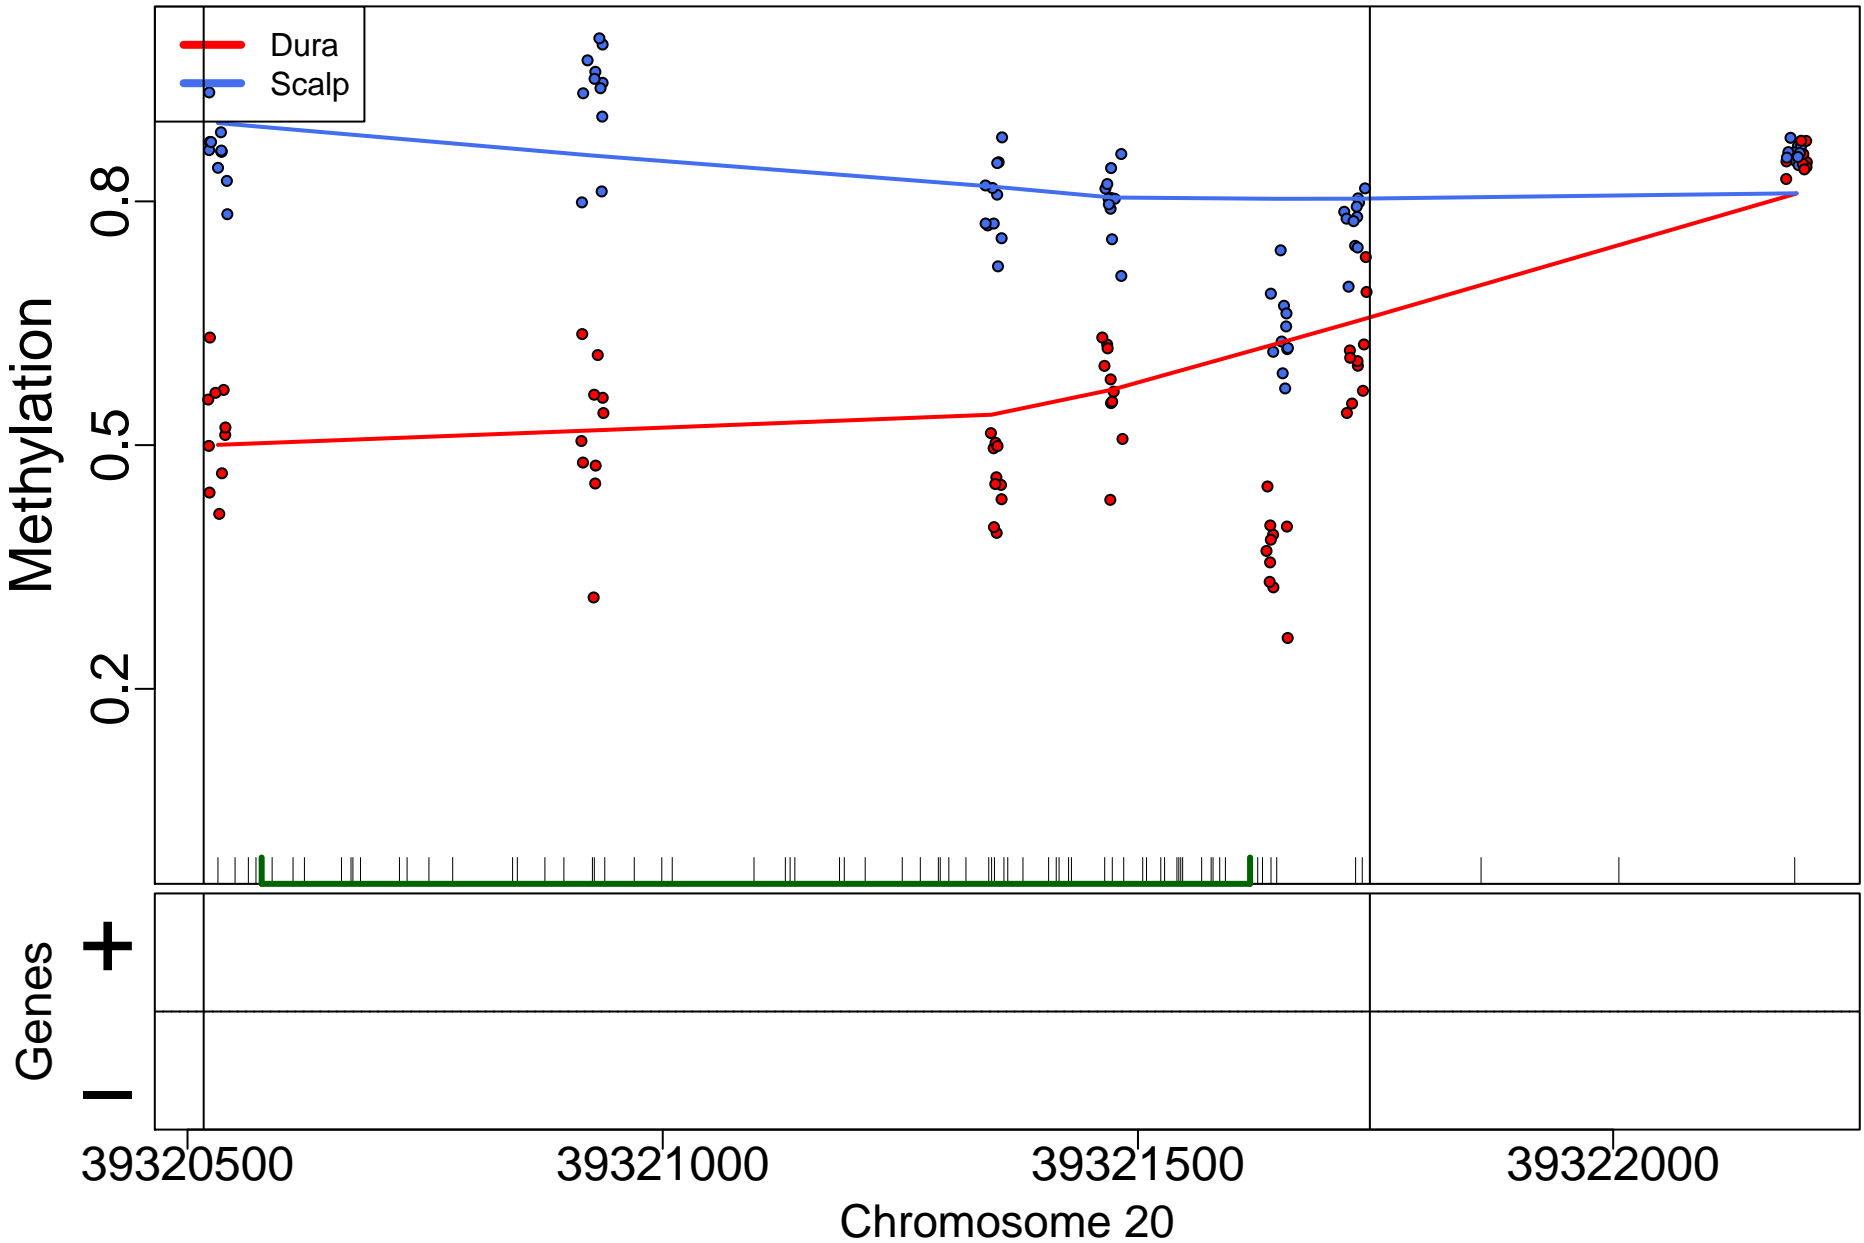

CLMP; 522bp from tss:promoter

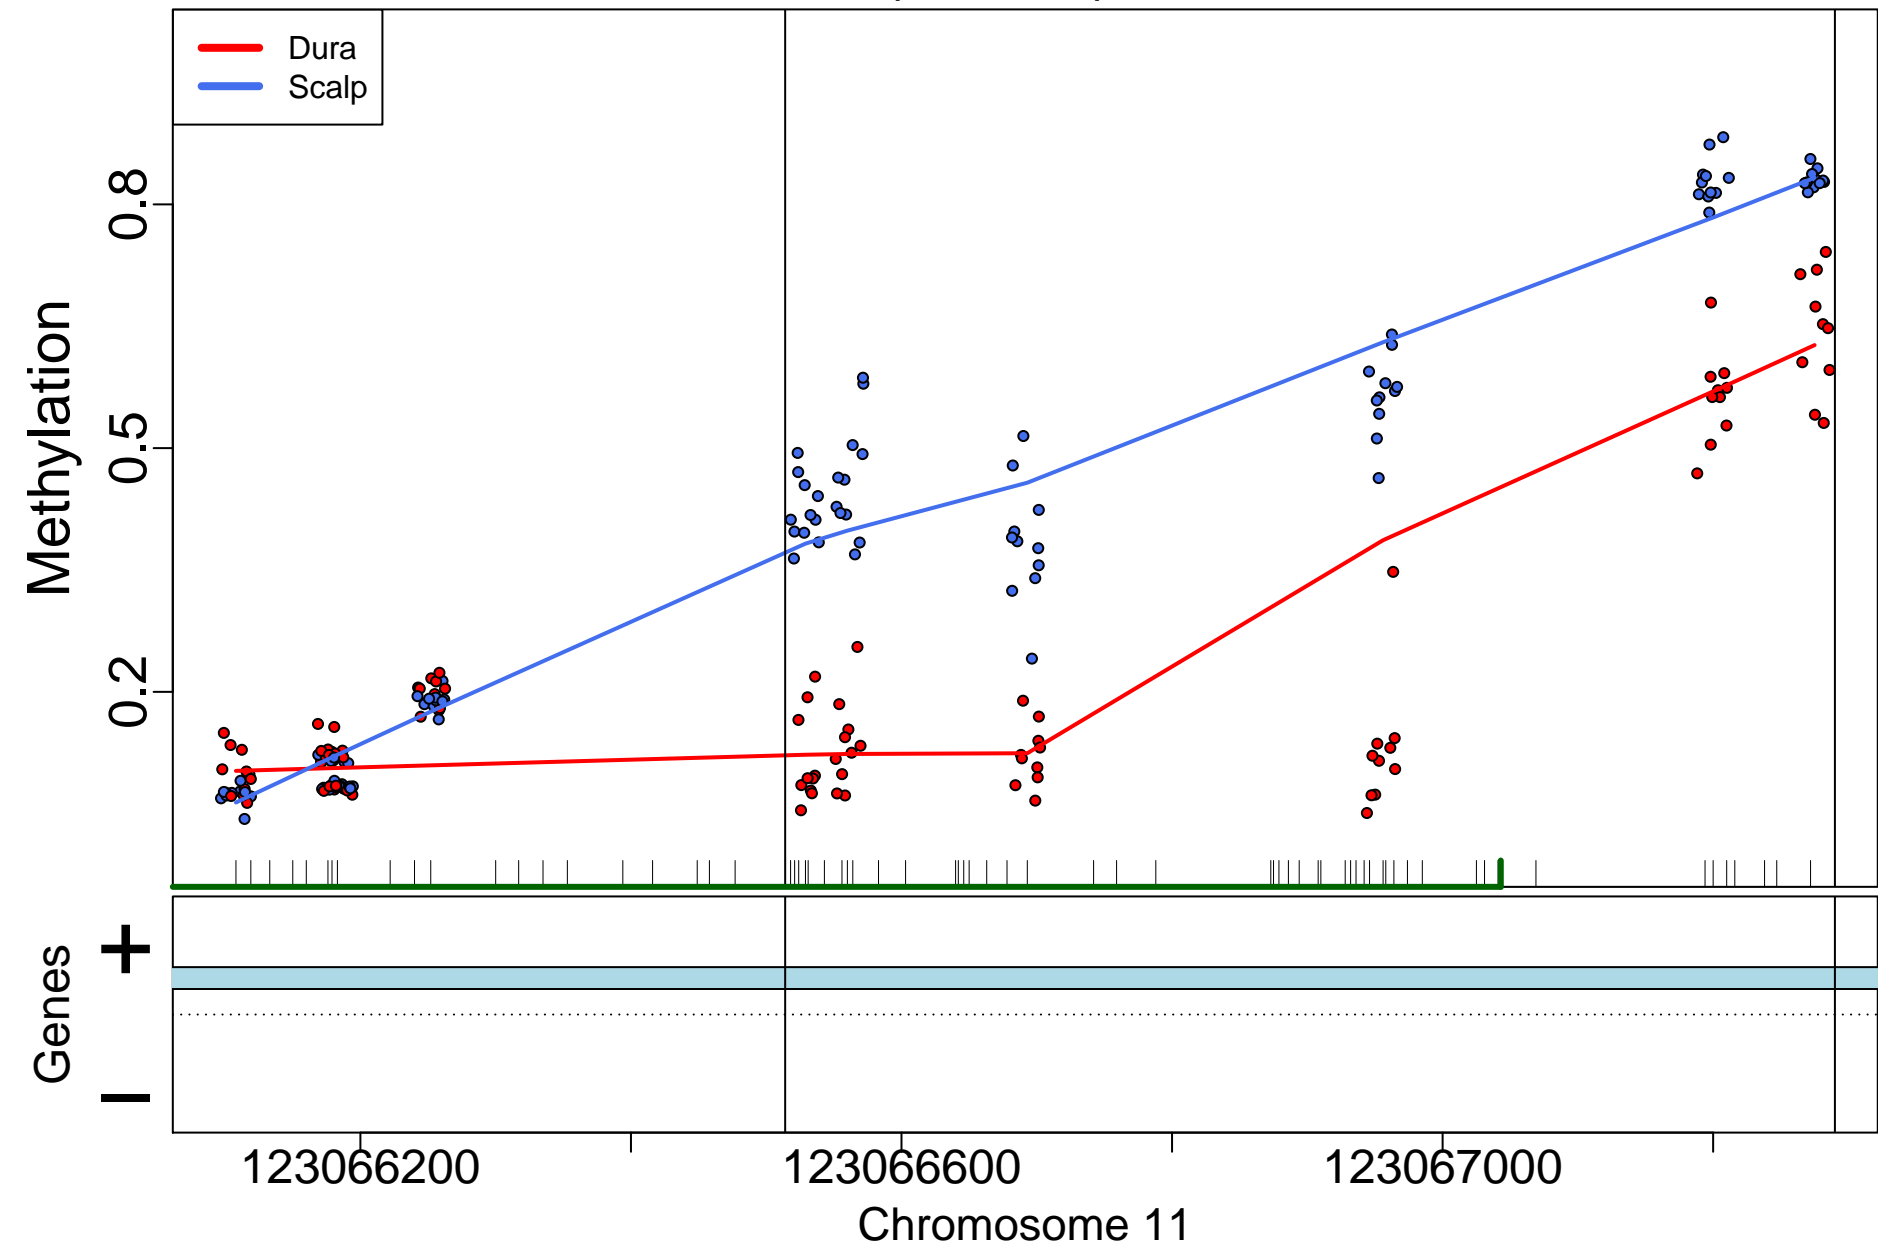

# SOST; 2832bp from tss:overlaps exon upstream

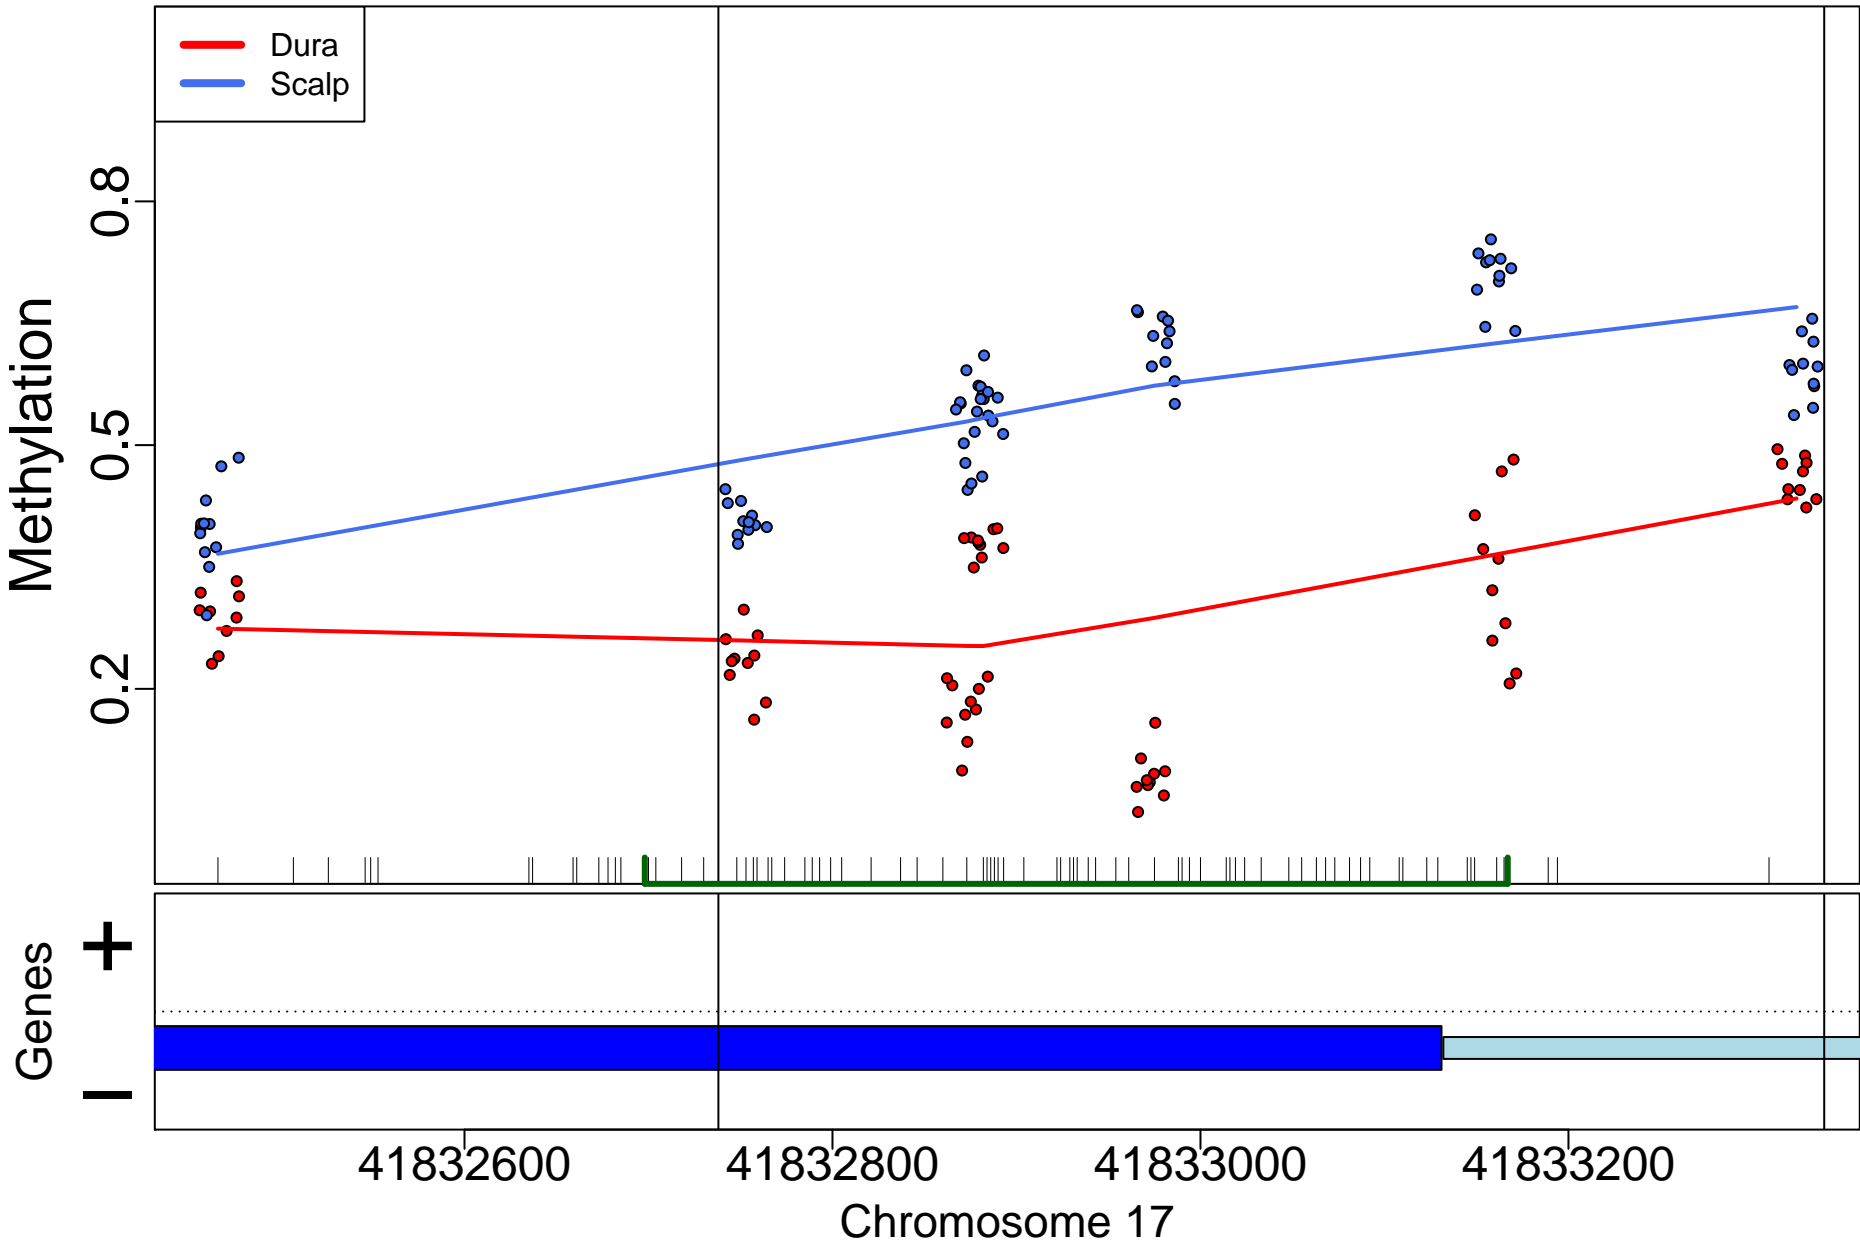

RAB2A; 102544bp from tss:upstream

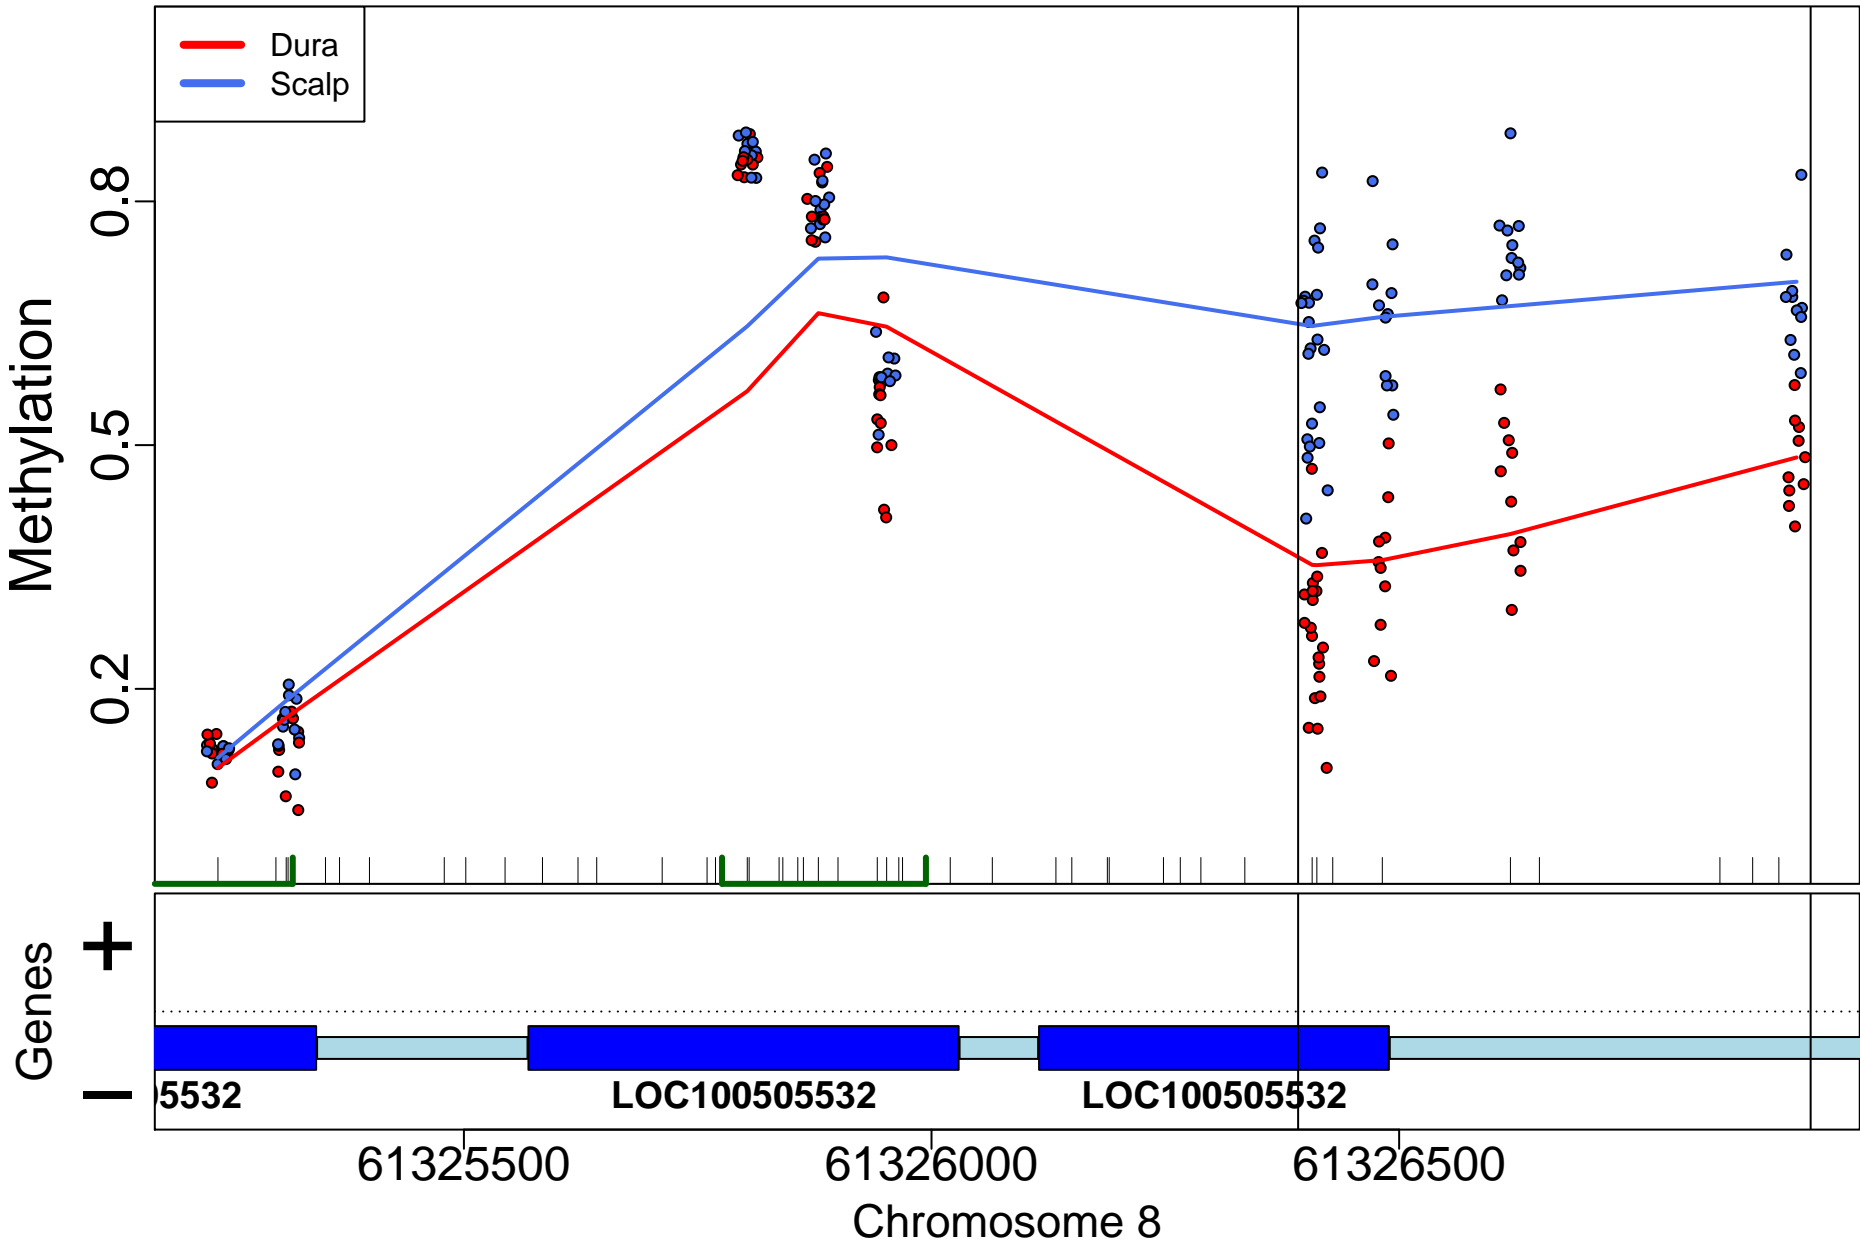



PITX2; 3924bp from tss:inside intron

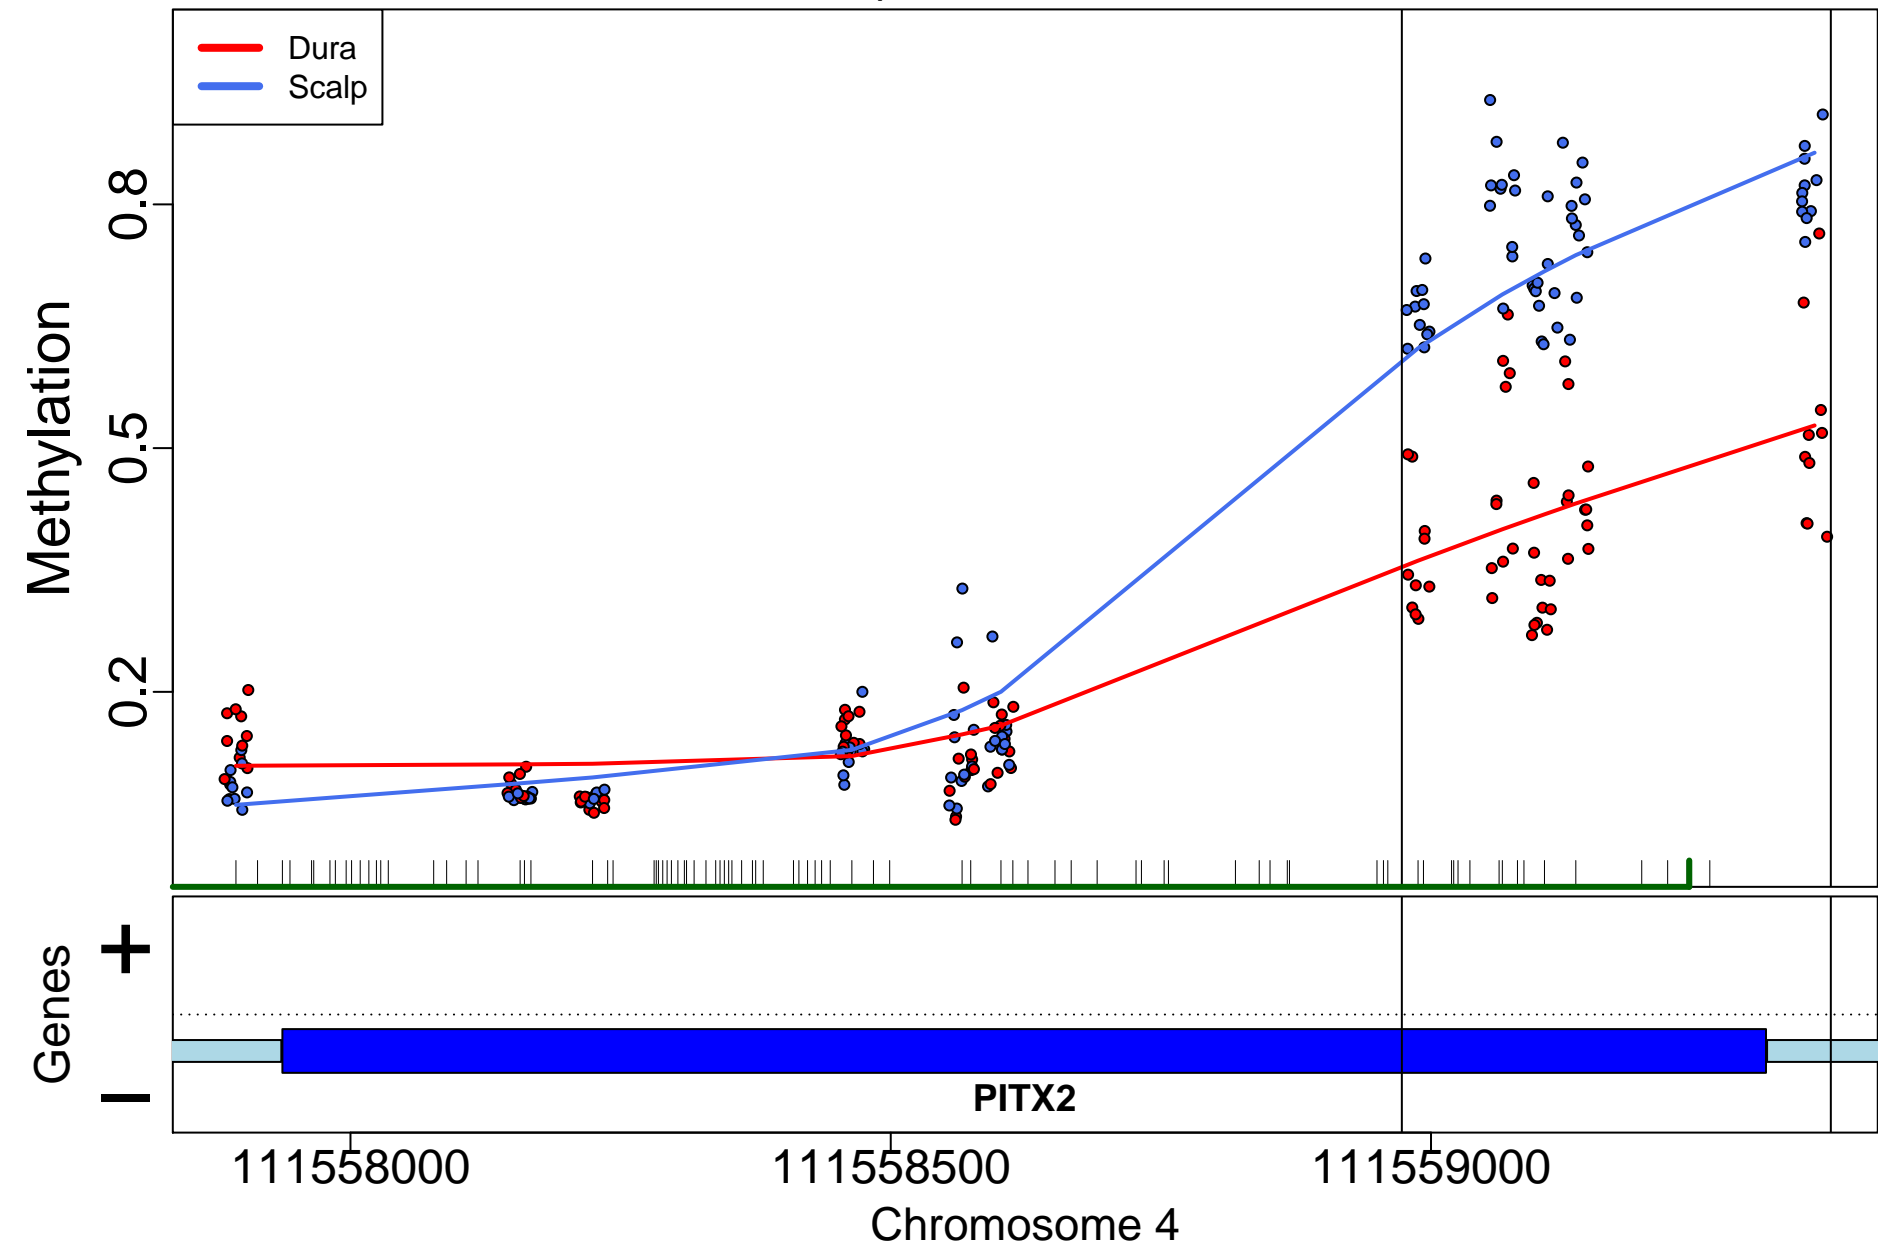

DMRT3; 522bp from tss:inside intron

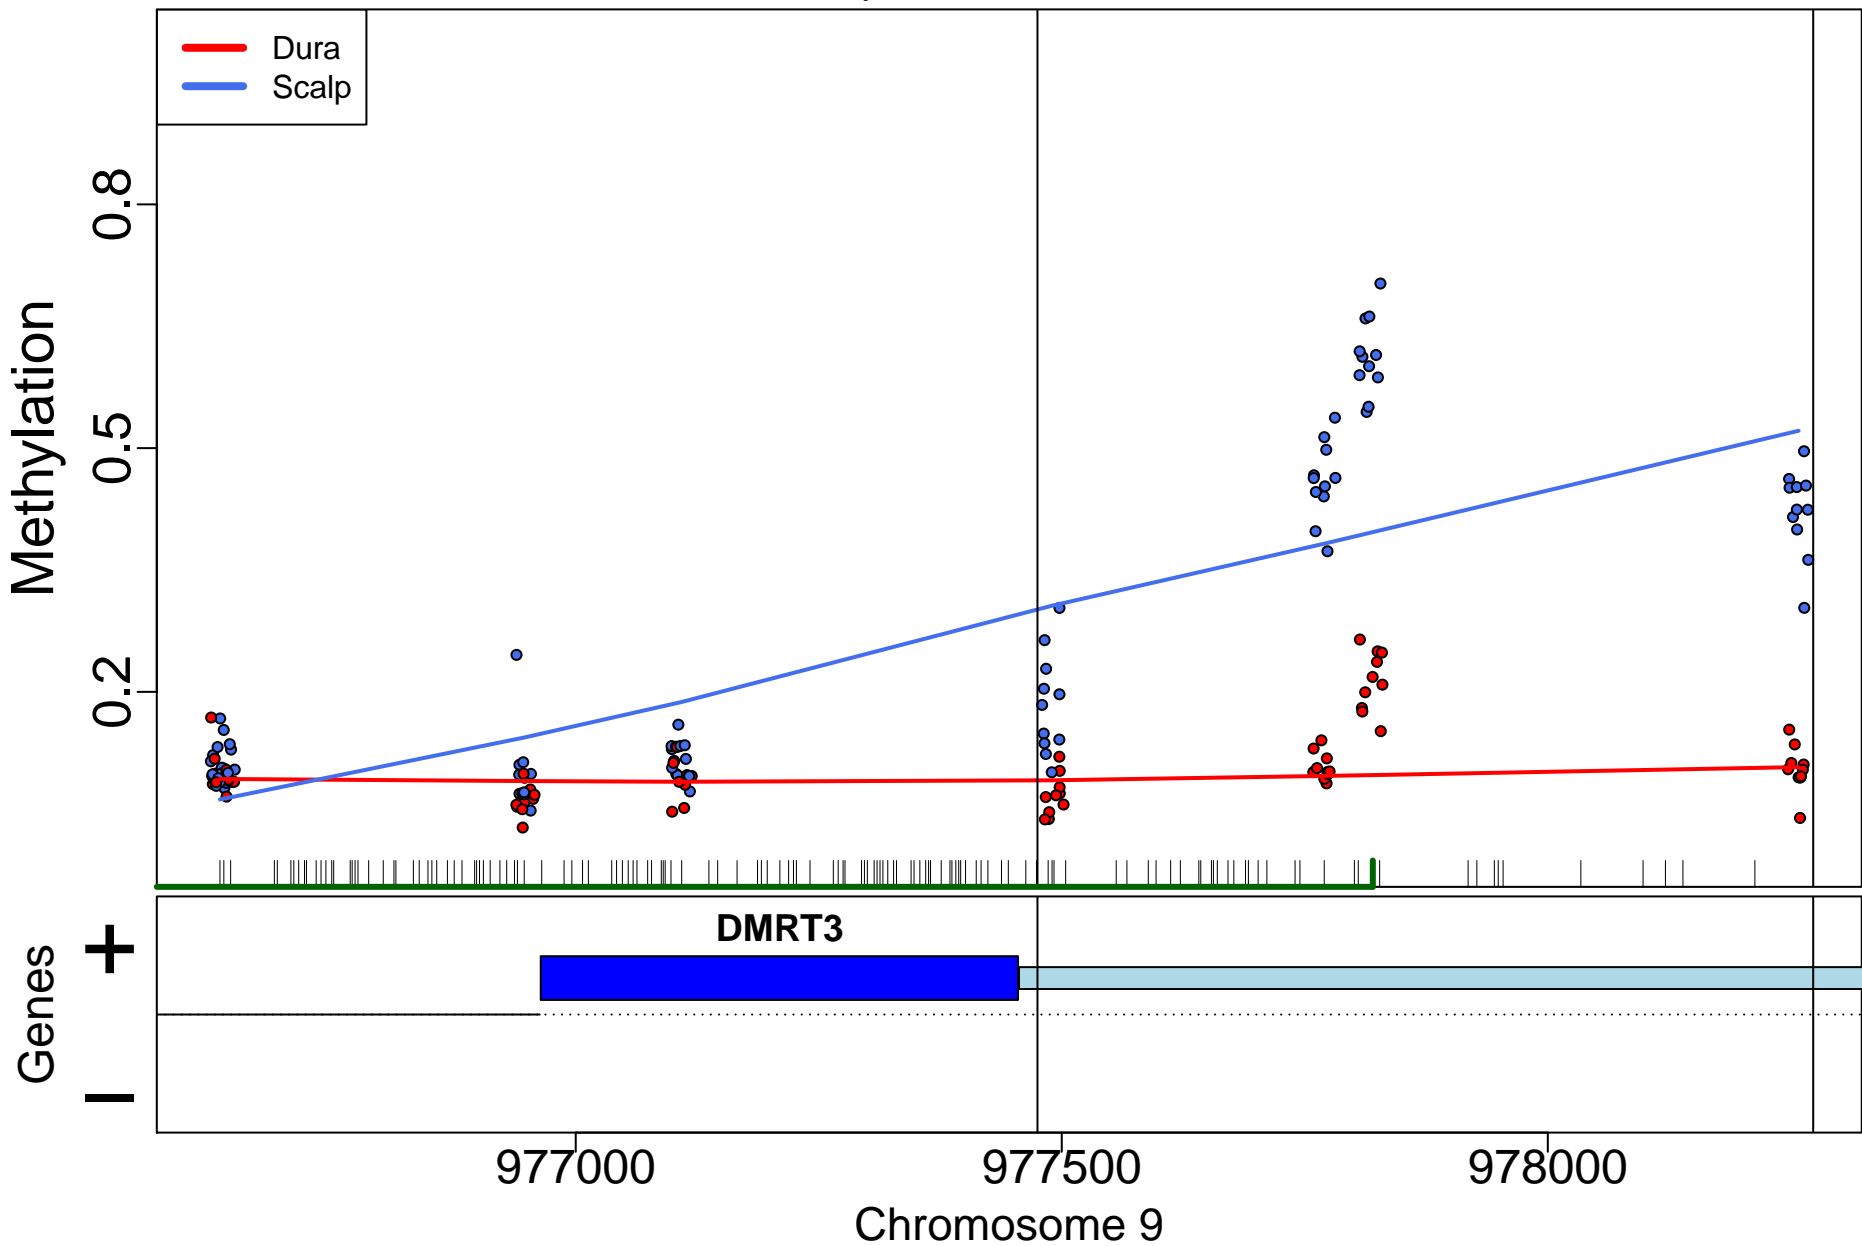

DIP2C; 70506bp from tss:inside intron

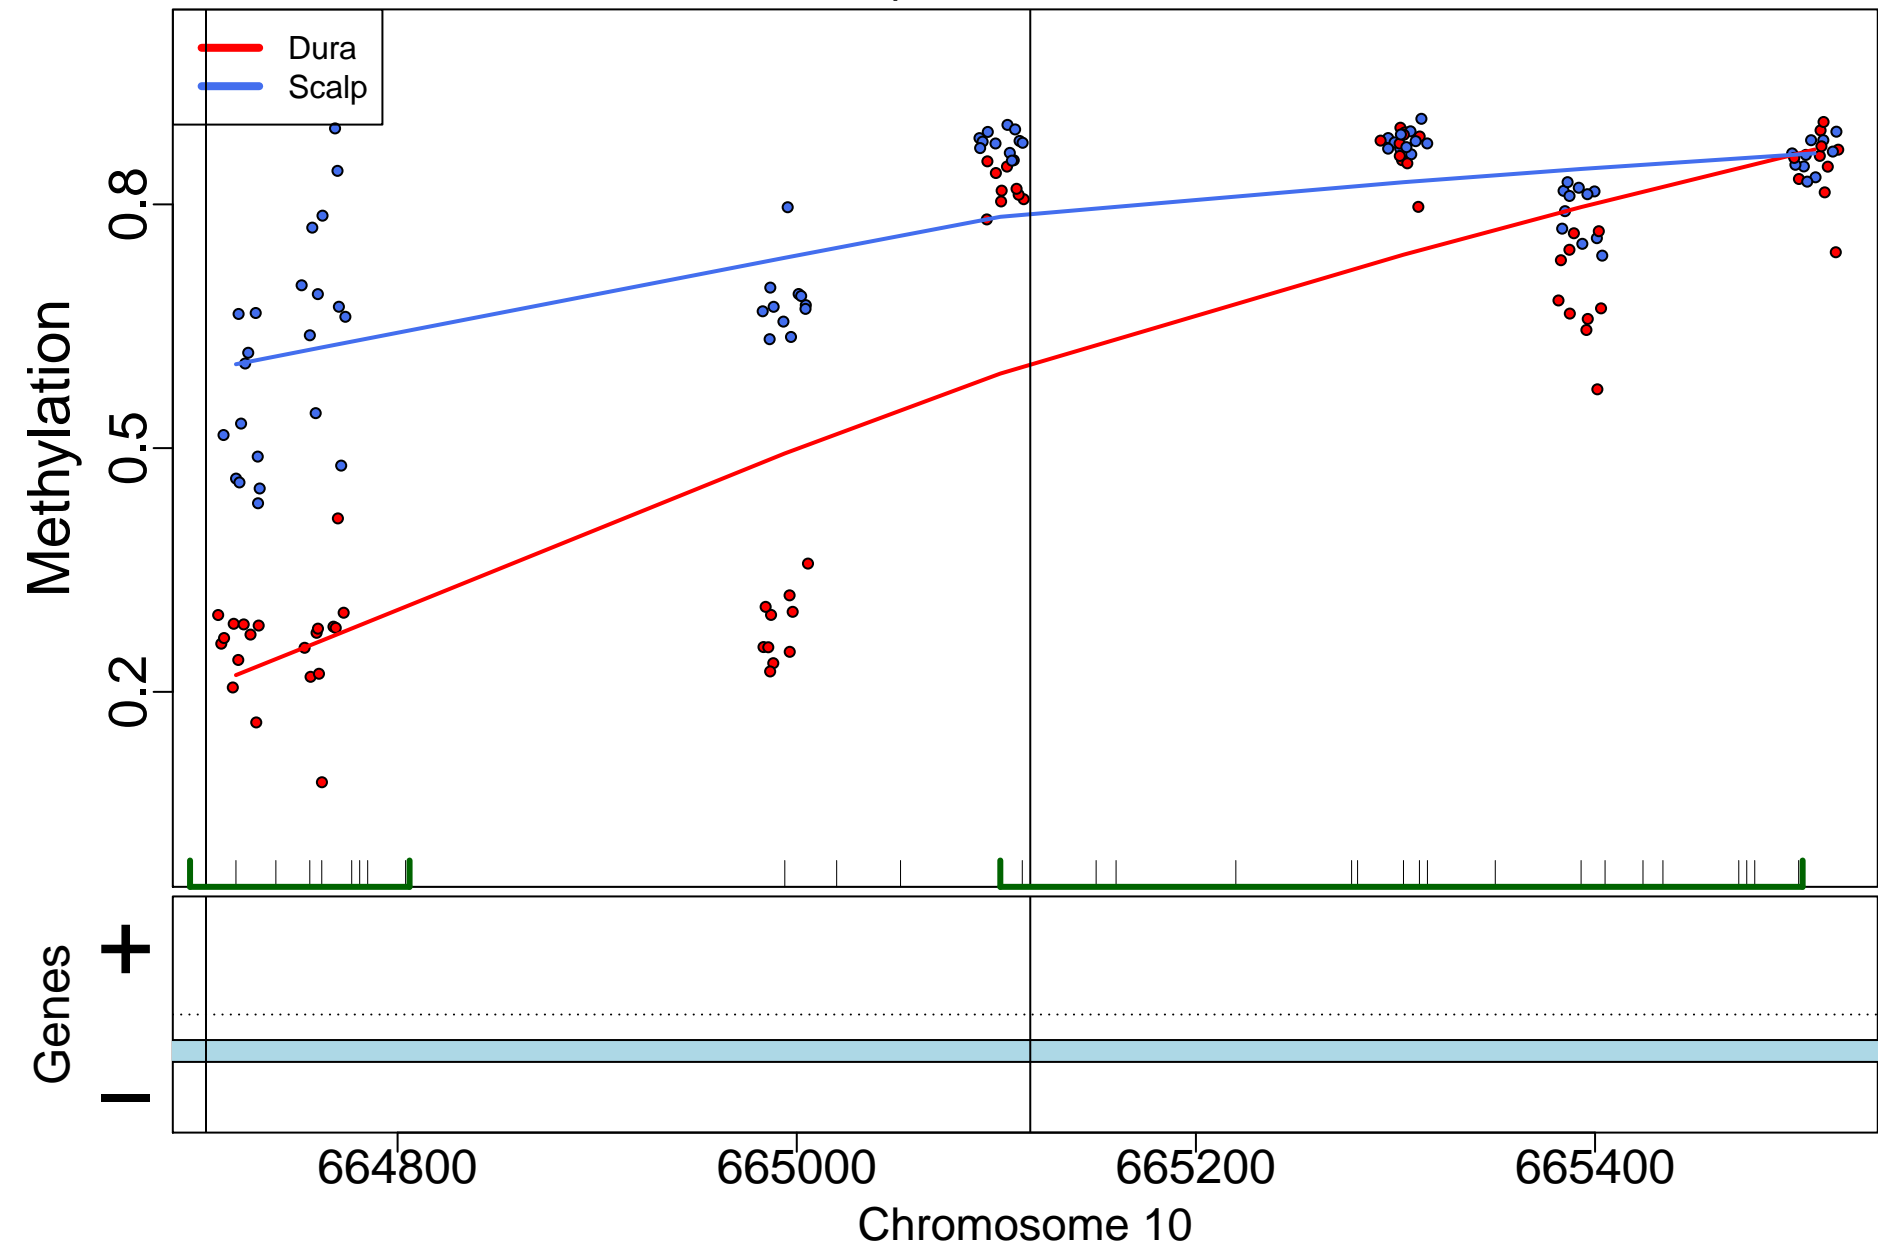

PODXL2; 466bp from tss:promoter

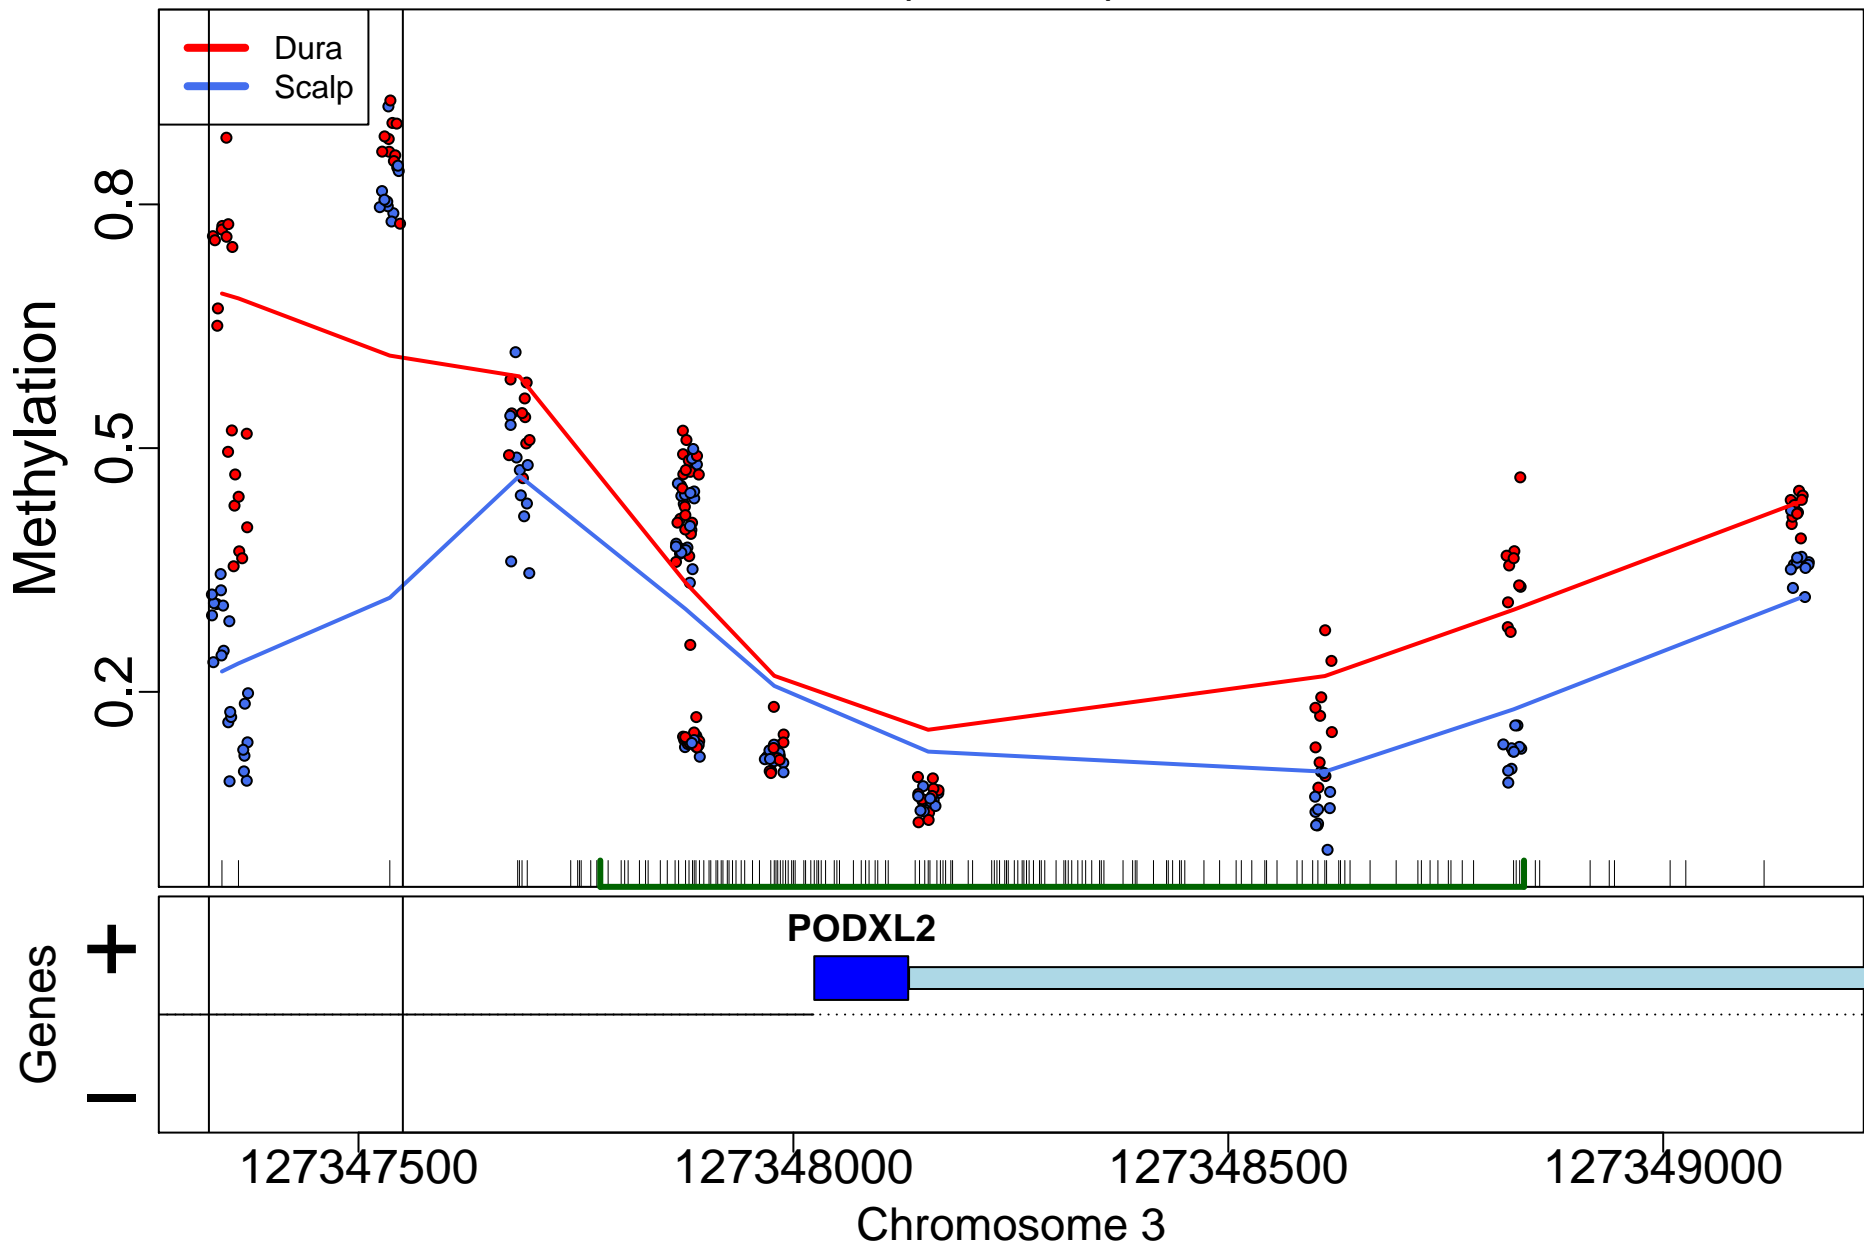

NXN; 53613bp from tss:inside intron

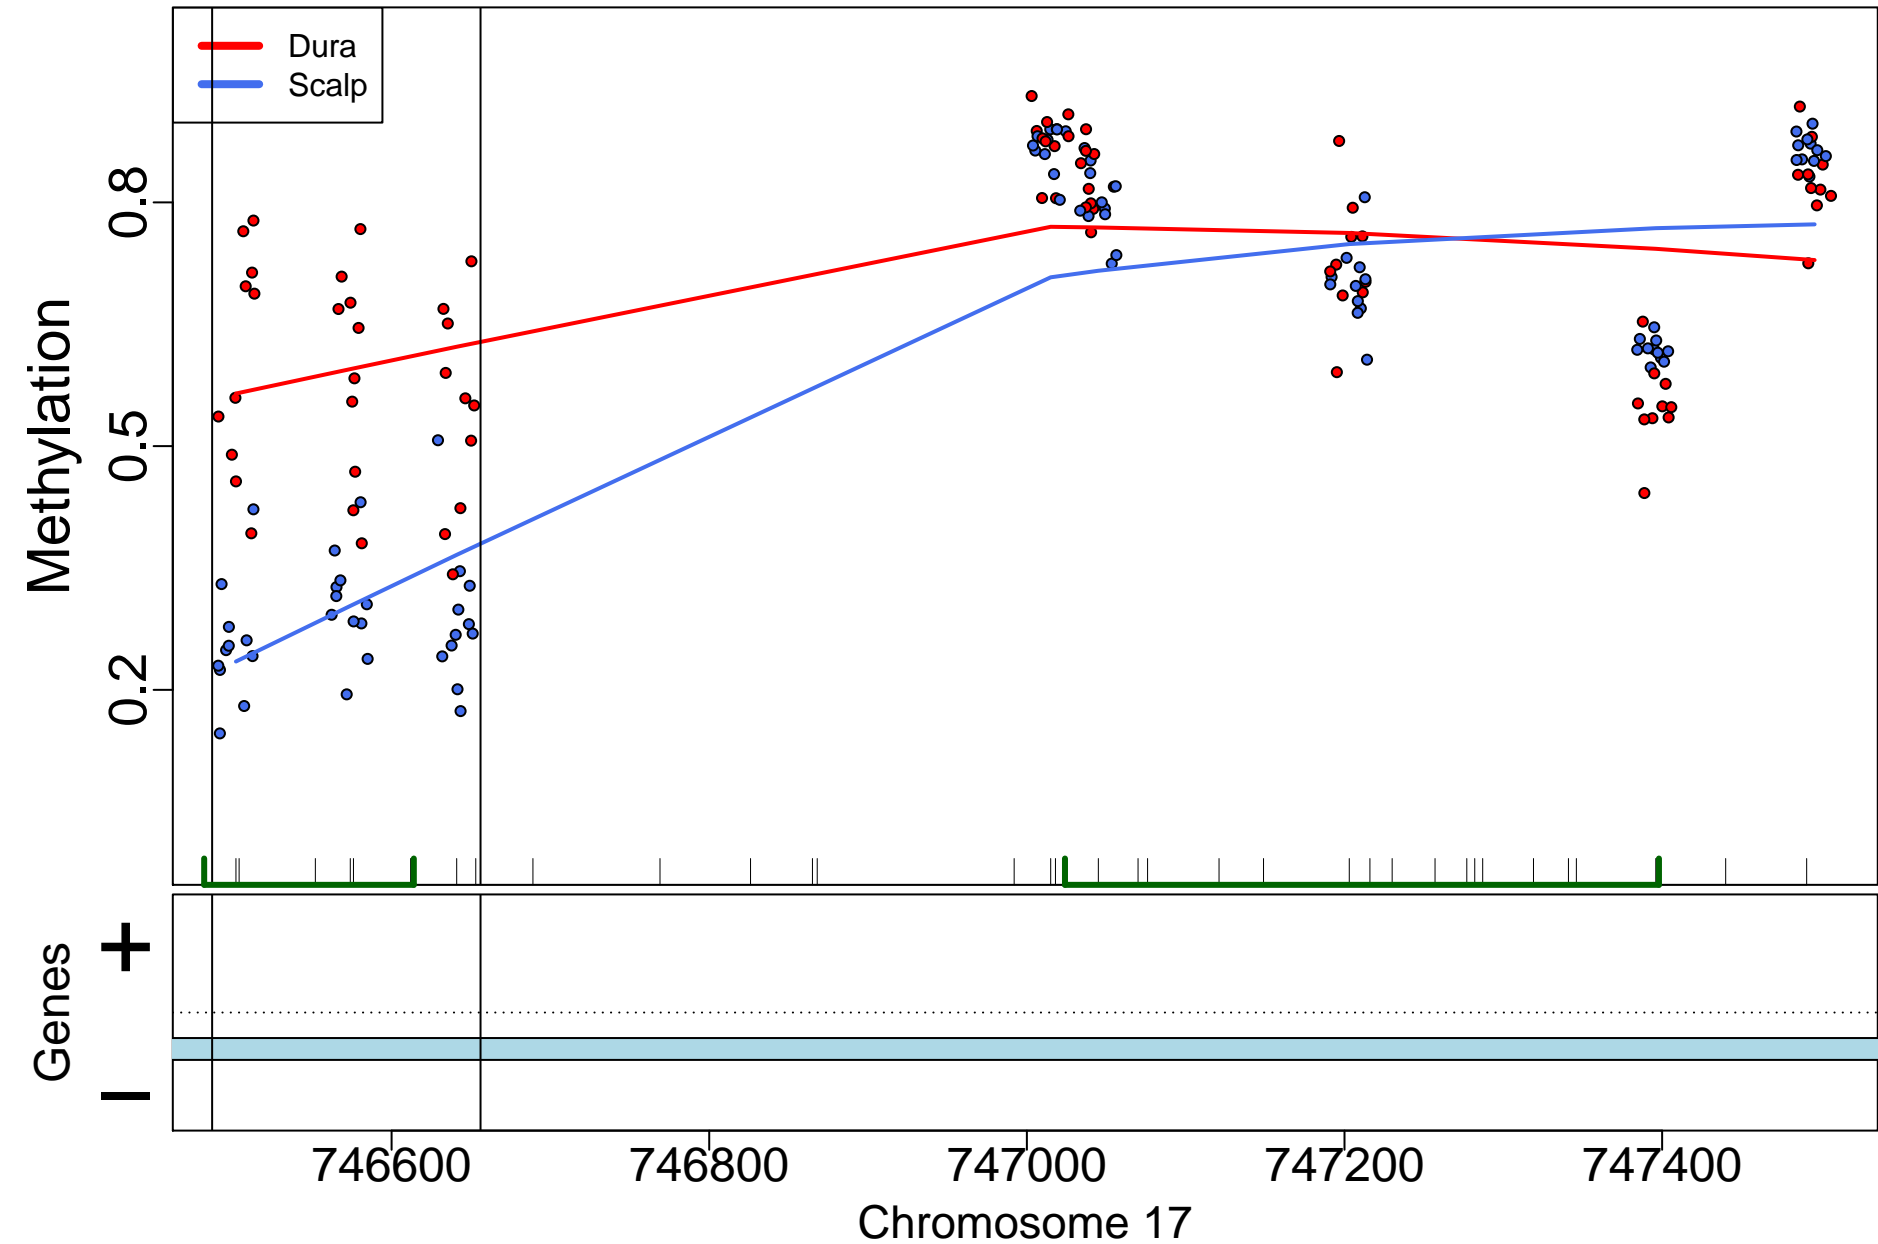

CTSO; 288bp from tss:promoter

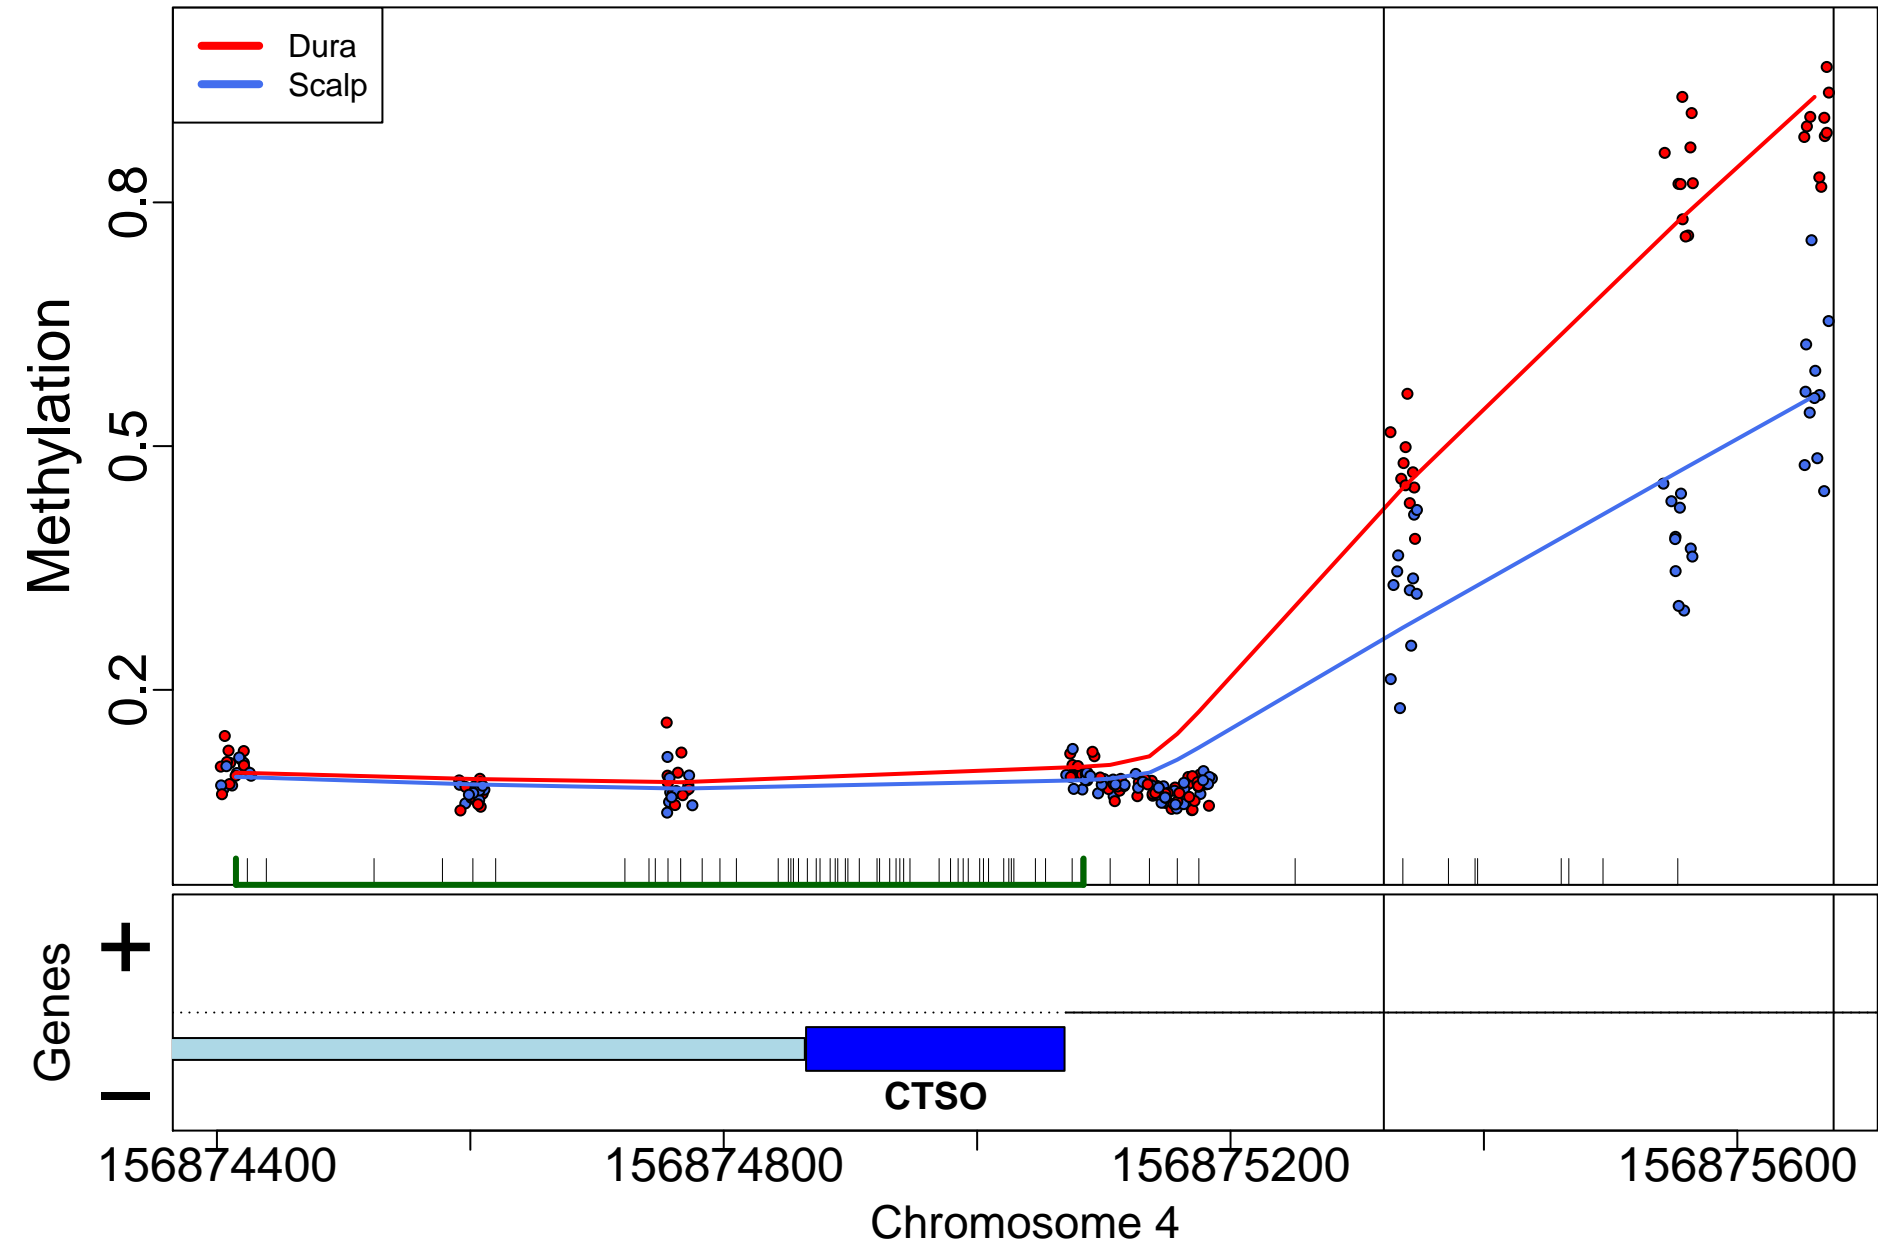

ITGA8; 823bp from tss:covers exon(s)

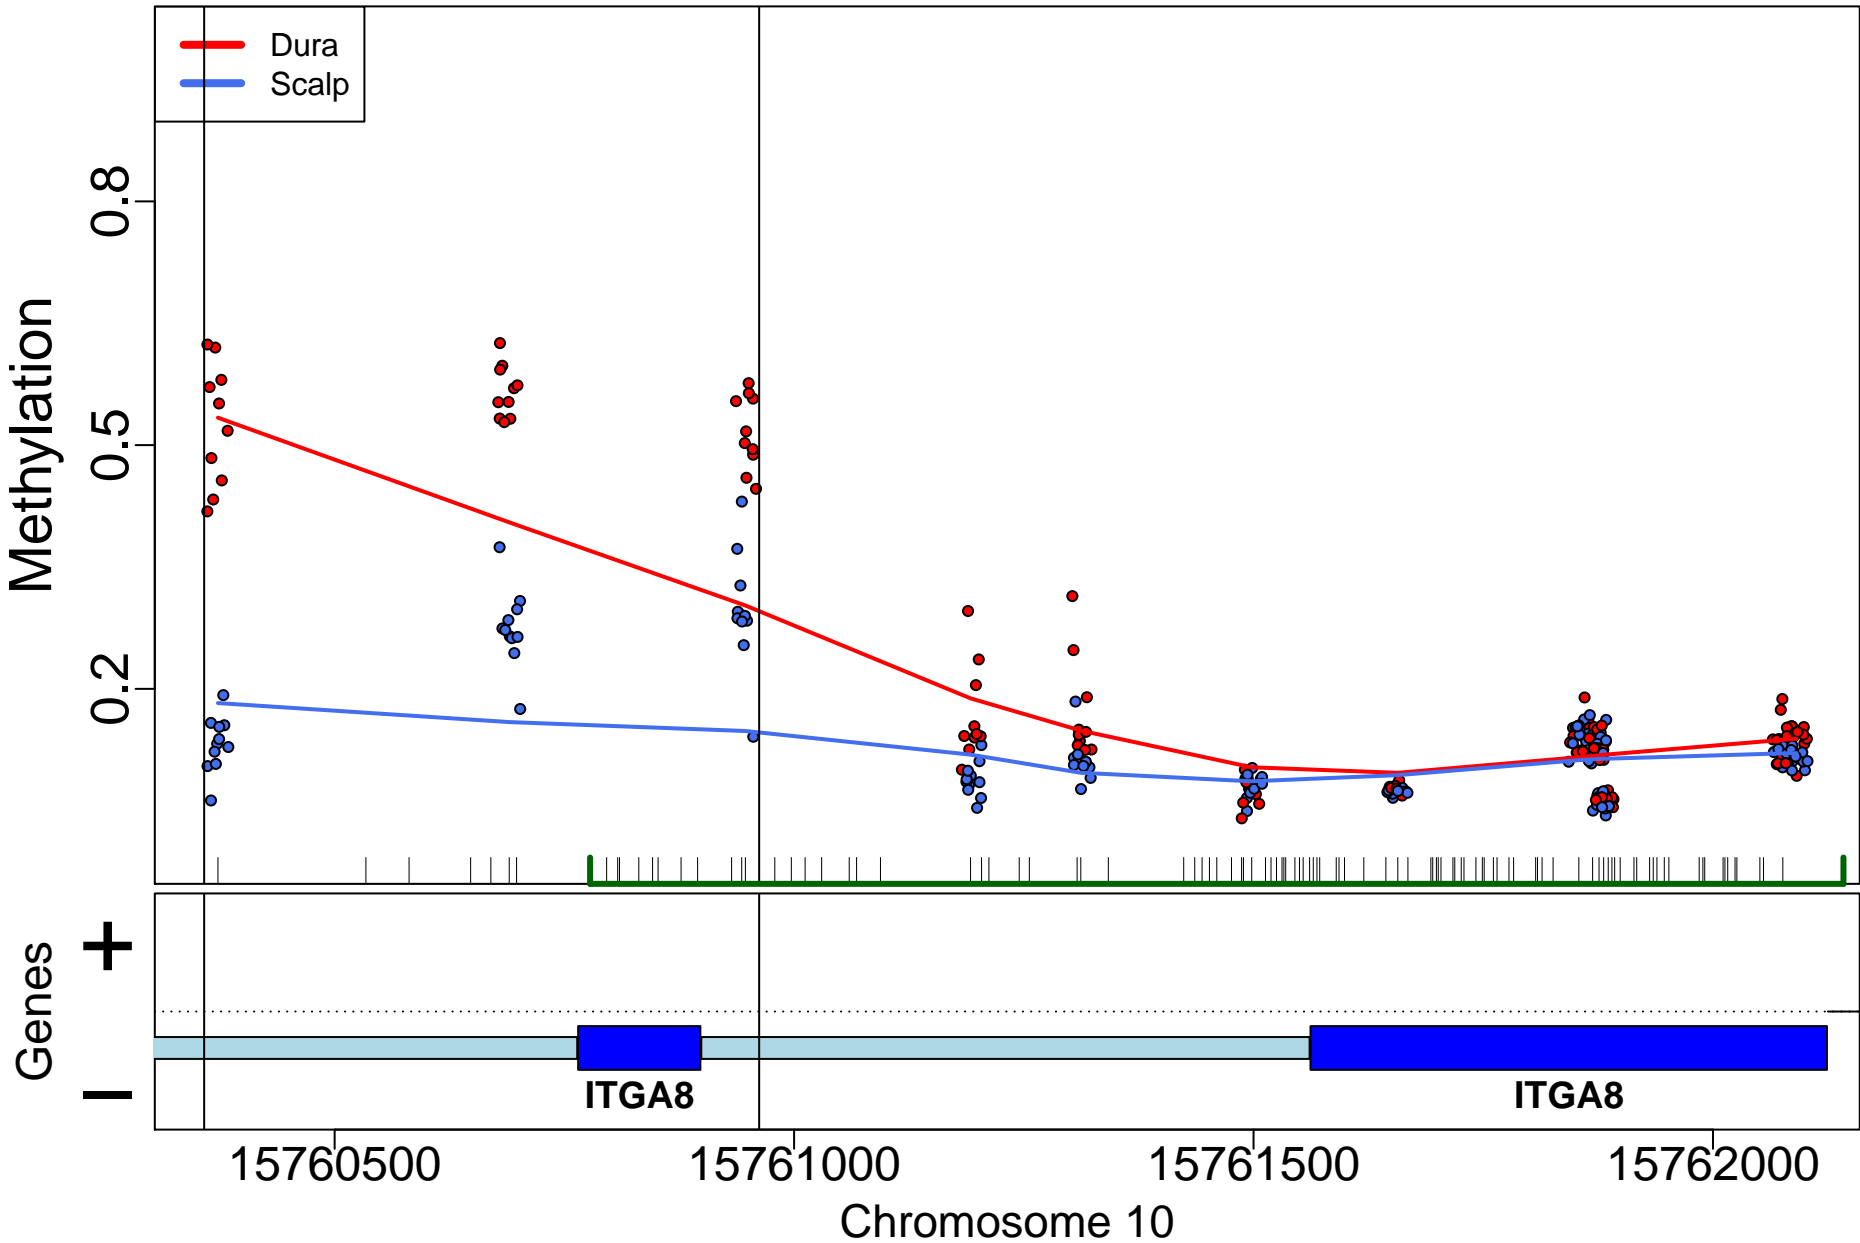

## GRB7; 0bp from tss:overlaps 5'

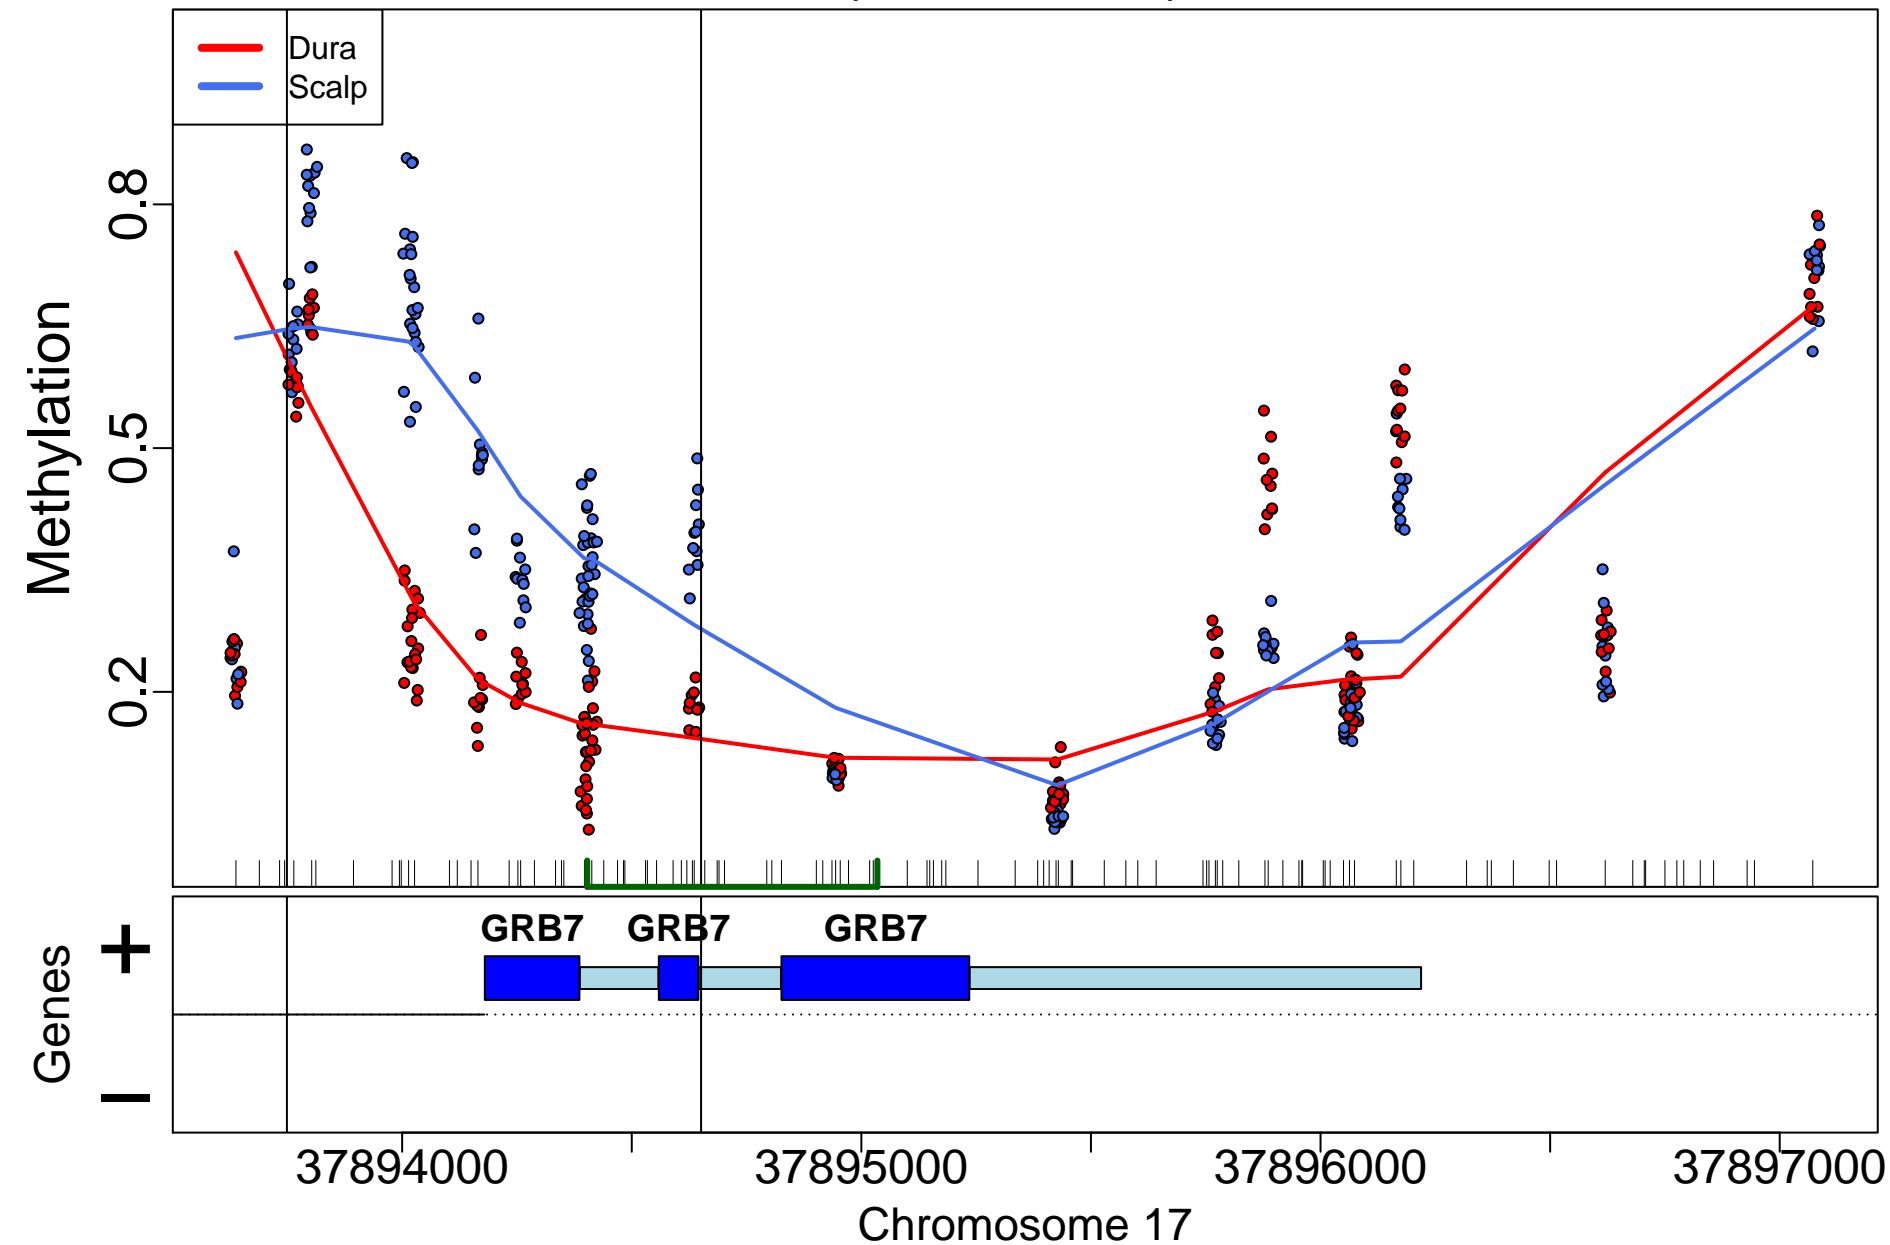



NTF3; 0bp from tss:overlaps 5'

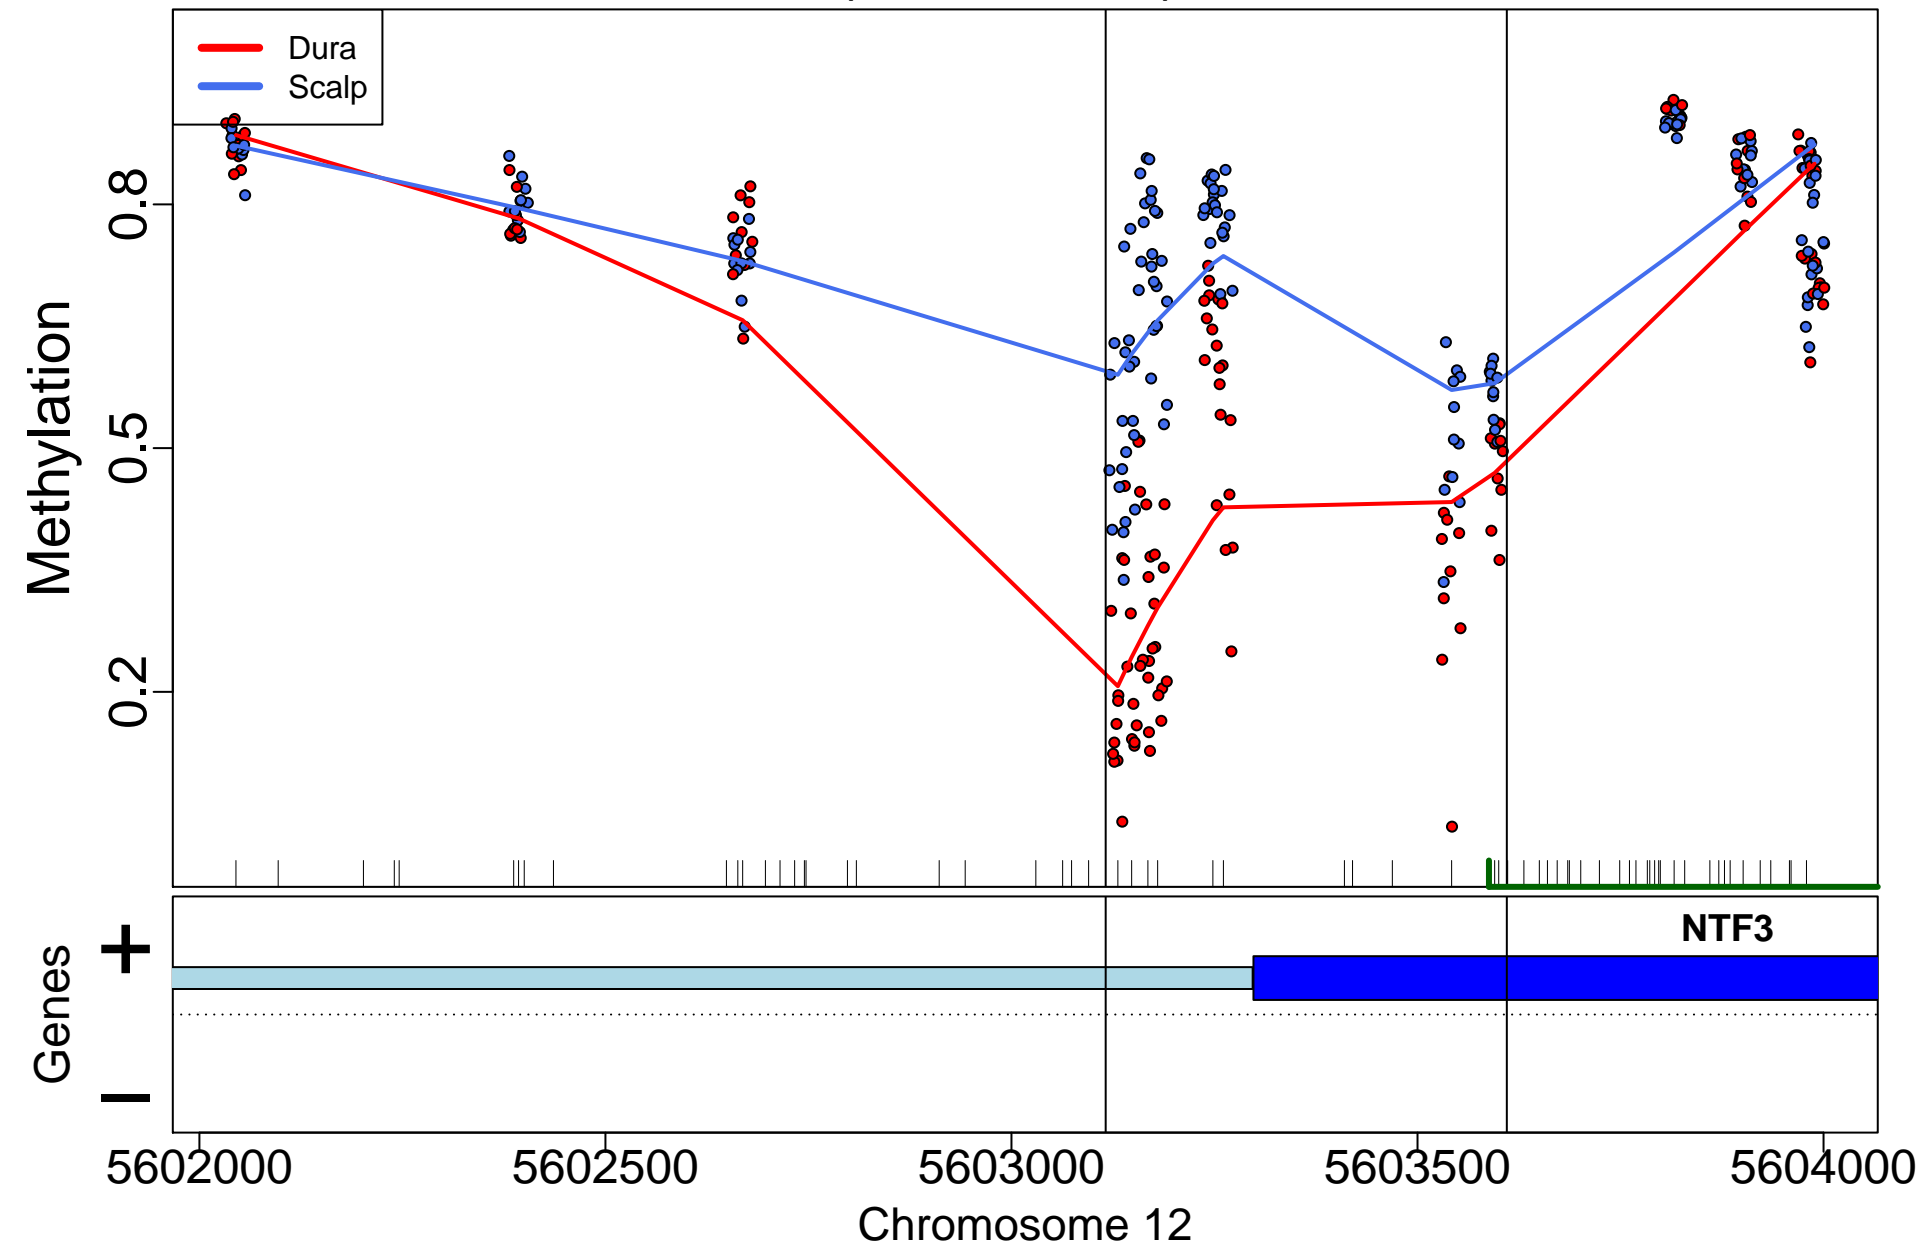

# SMOC2; 55861bp from tss:upstream

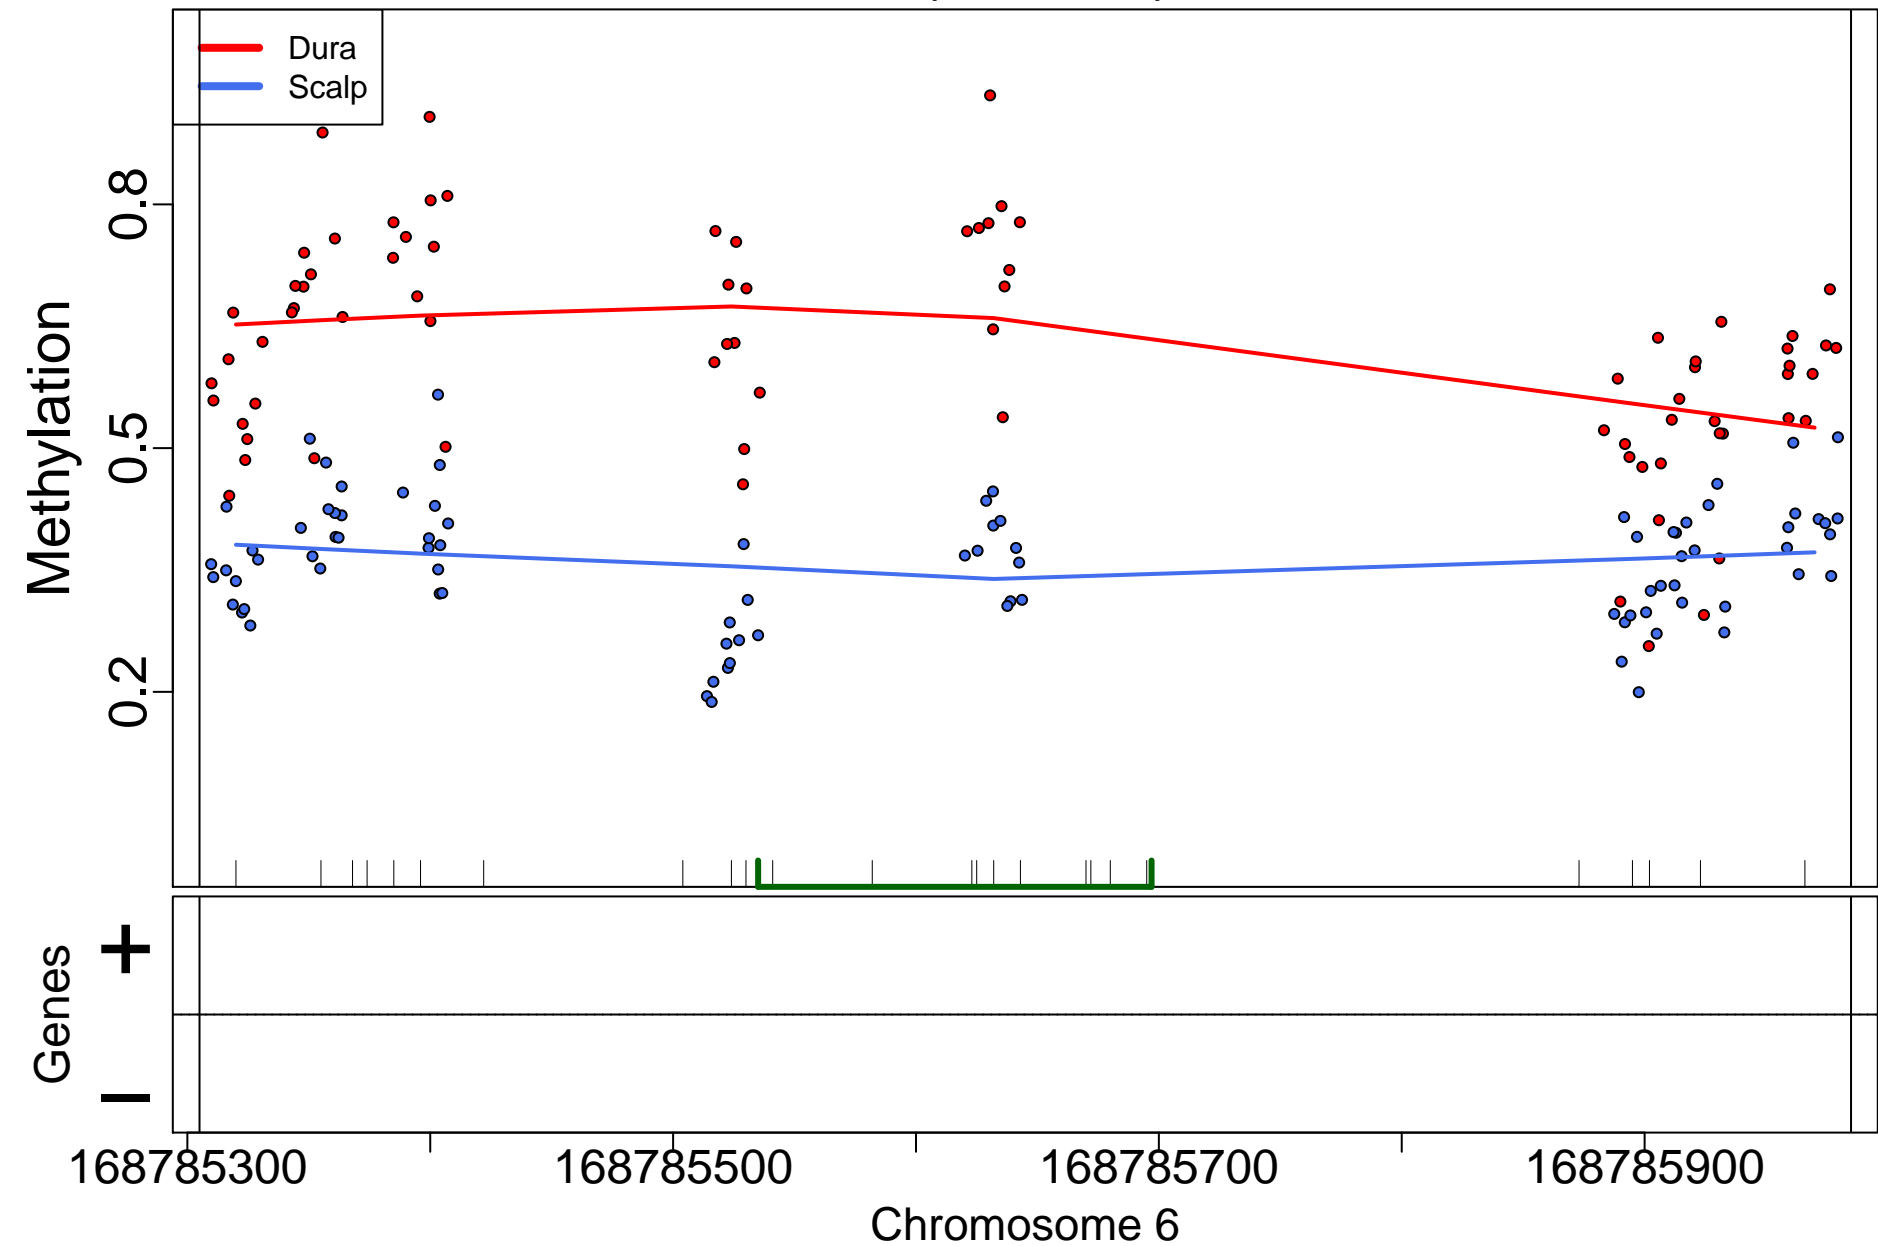

# SORBS2; 144442bp from tss:inside intron

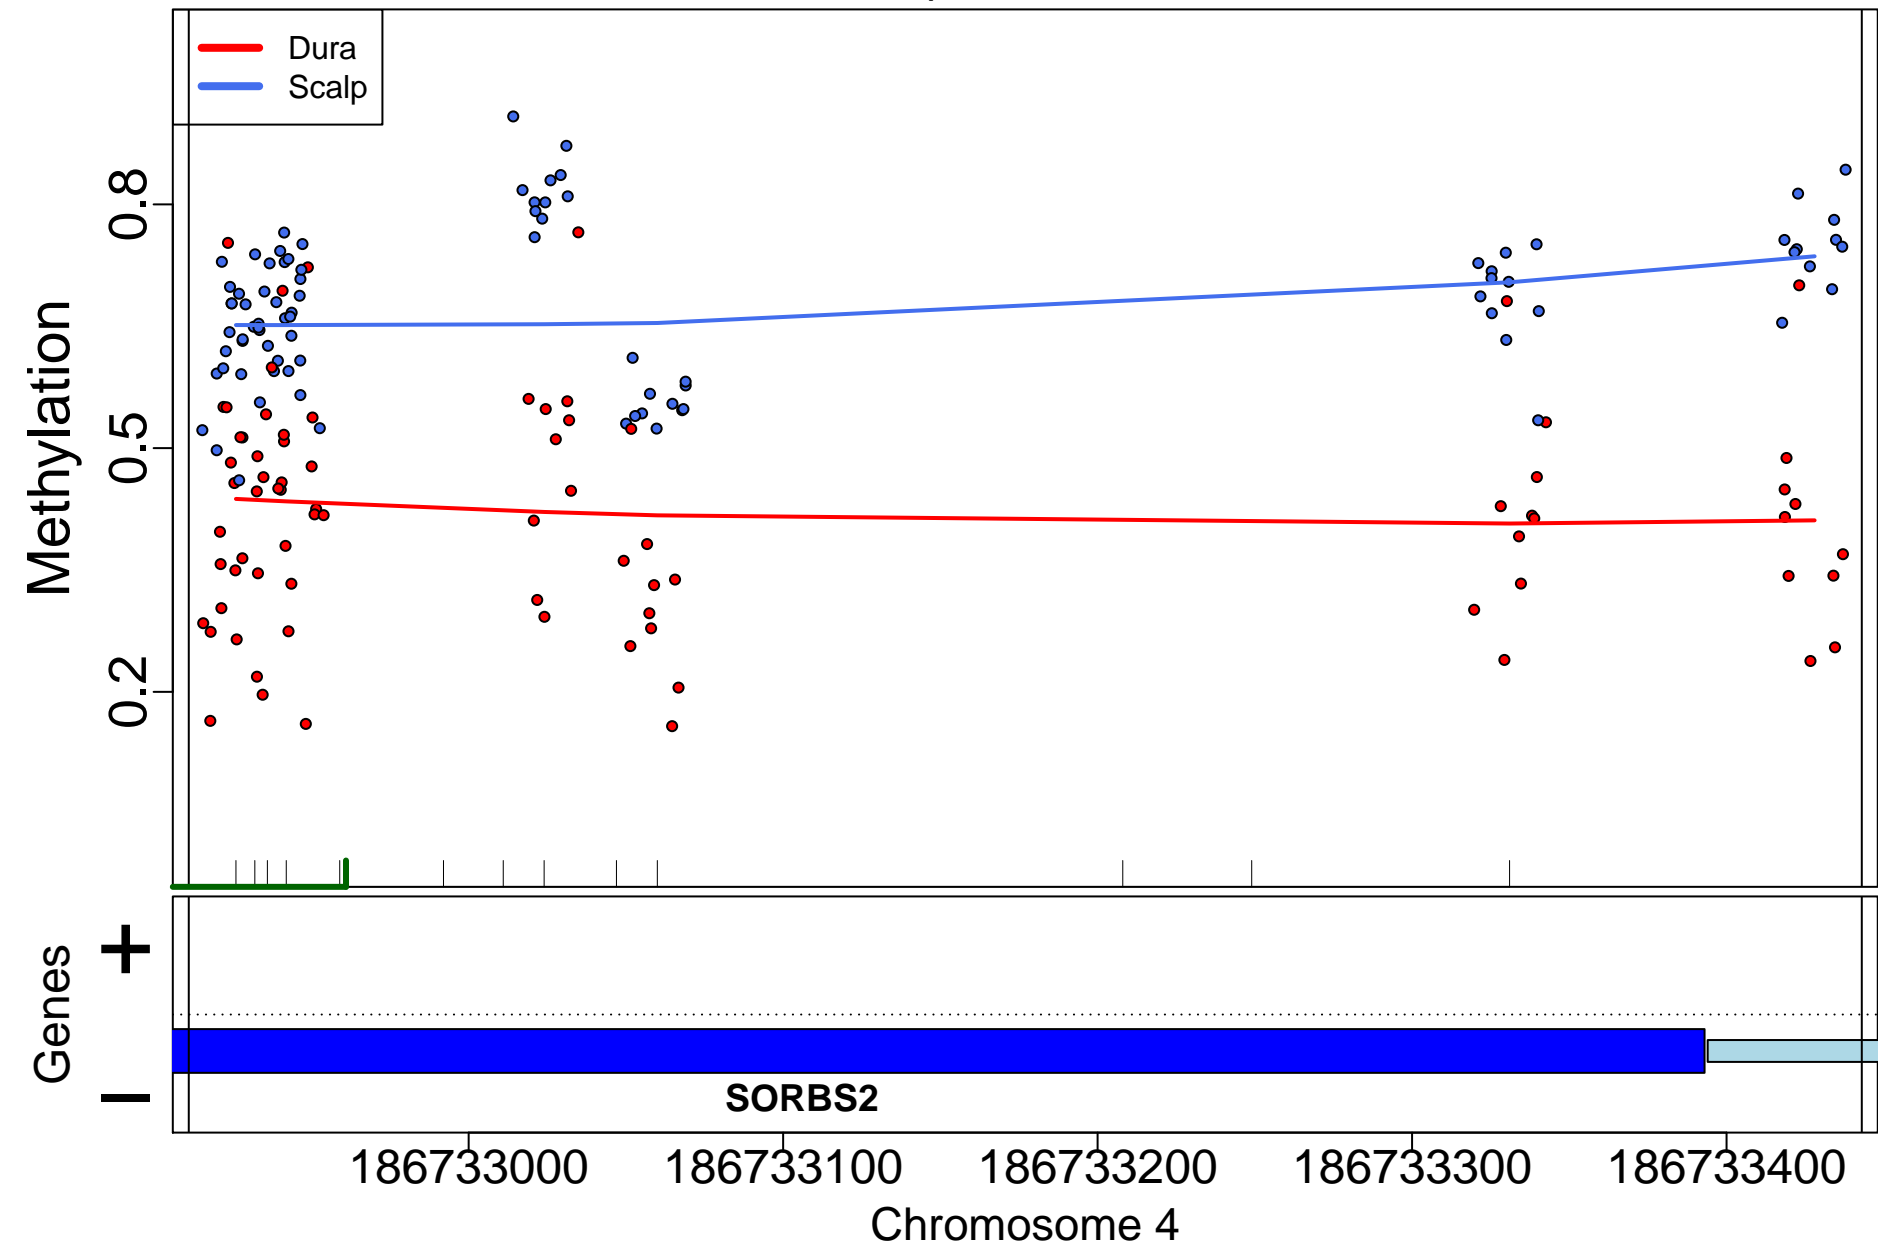

NKX2-5; 5602bp from tss:downstream

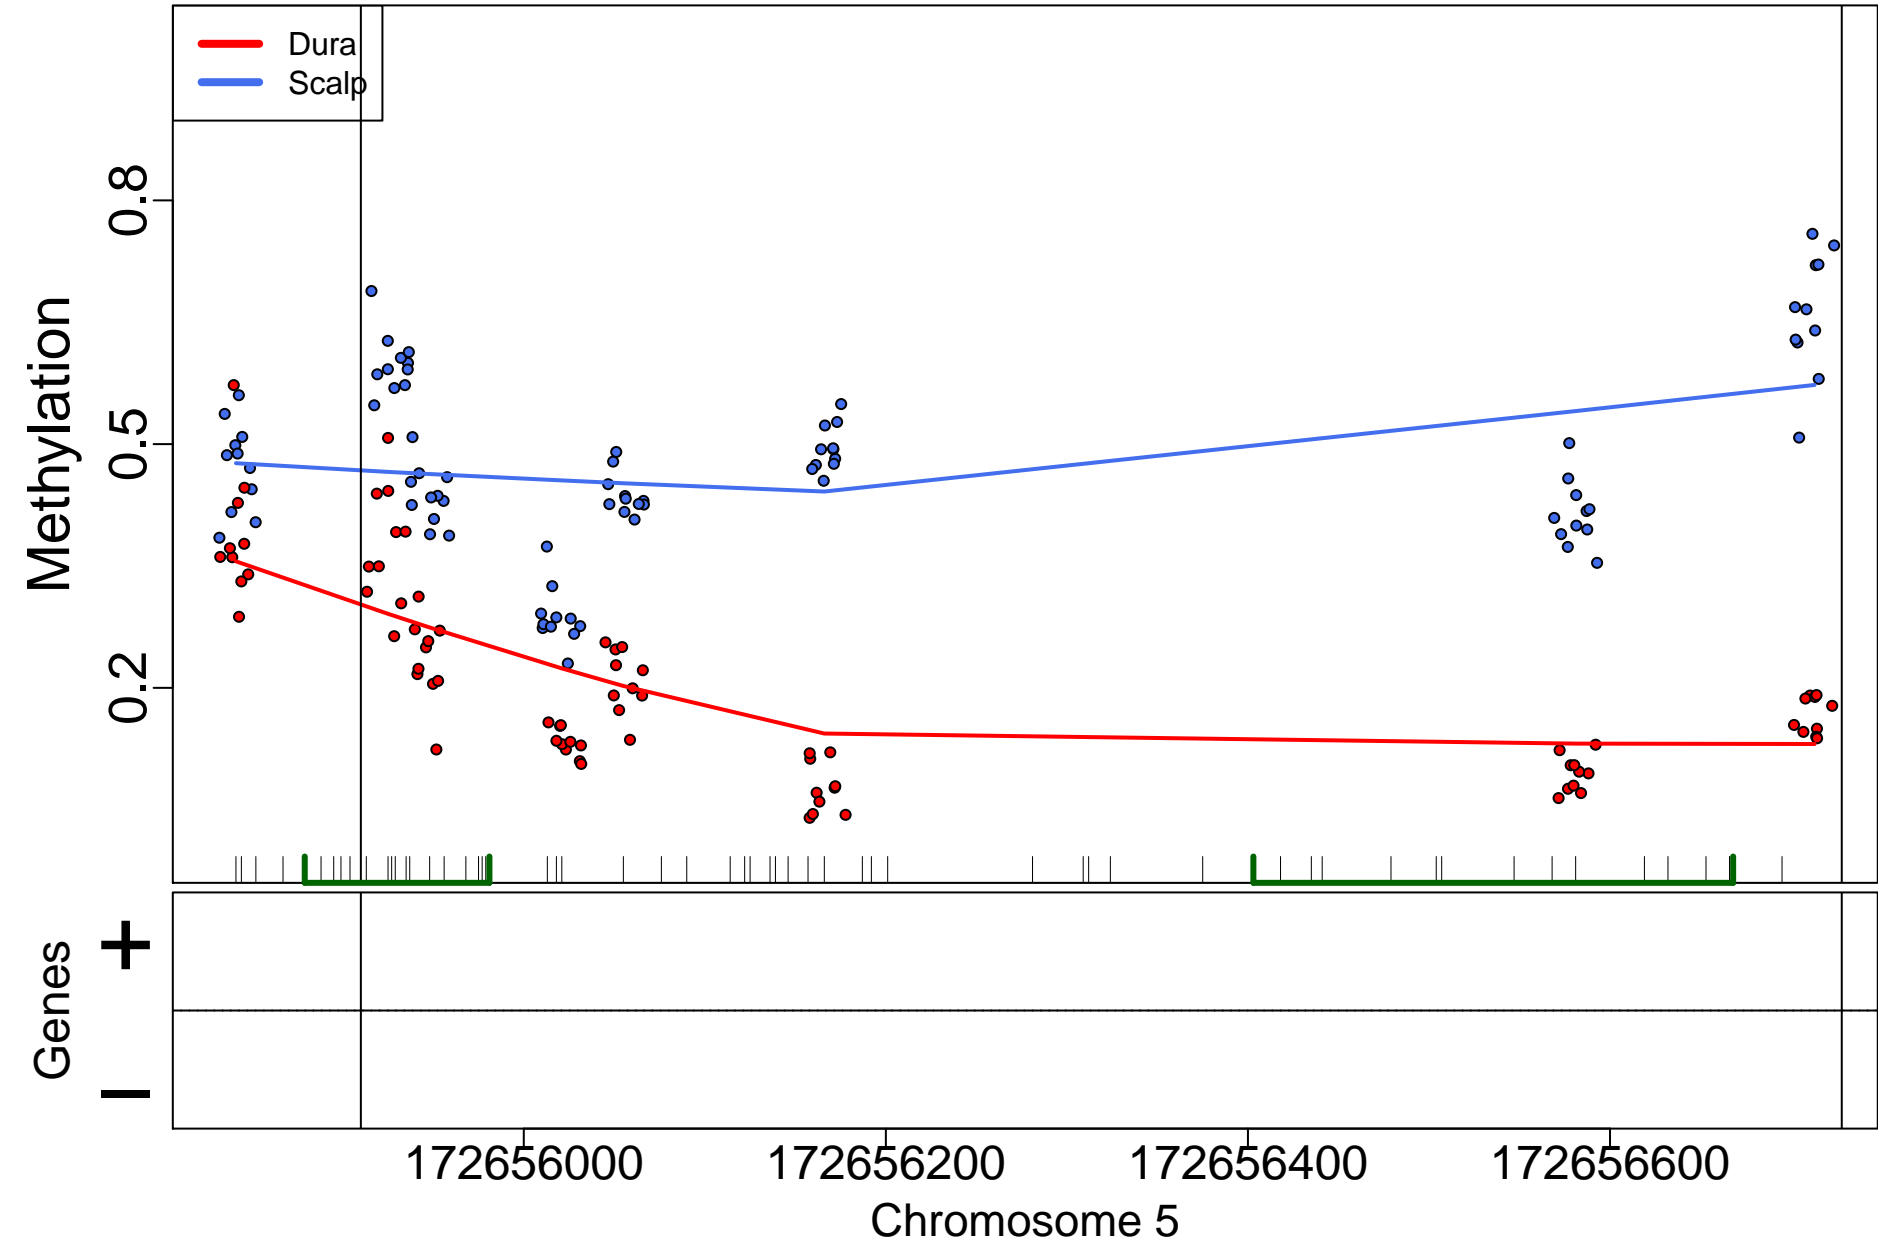

# YTHDC1; 169bp from tss:promoter

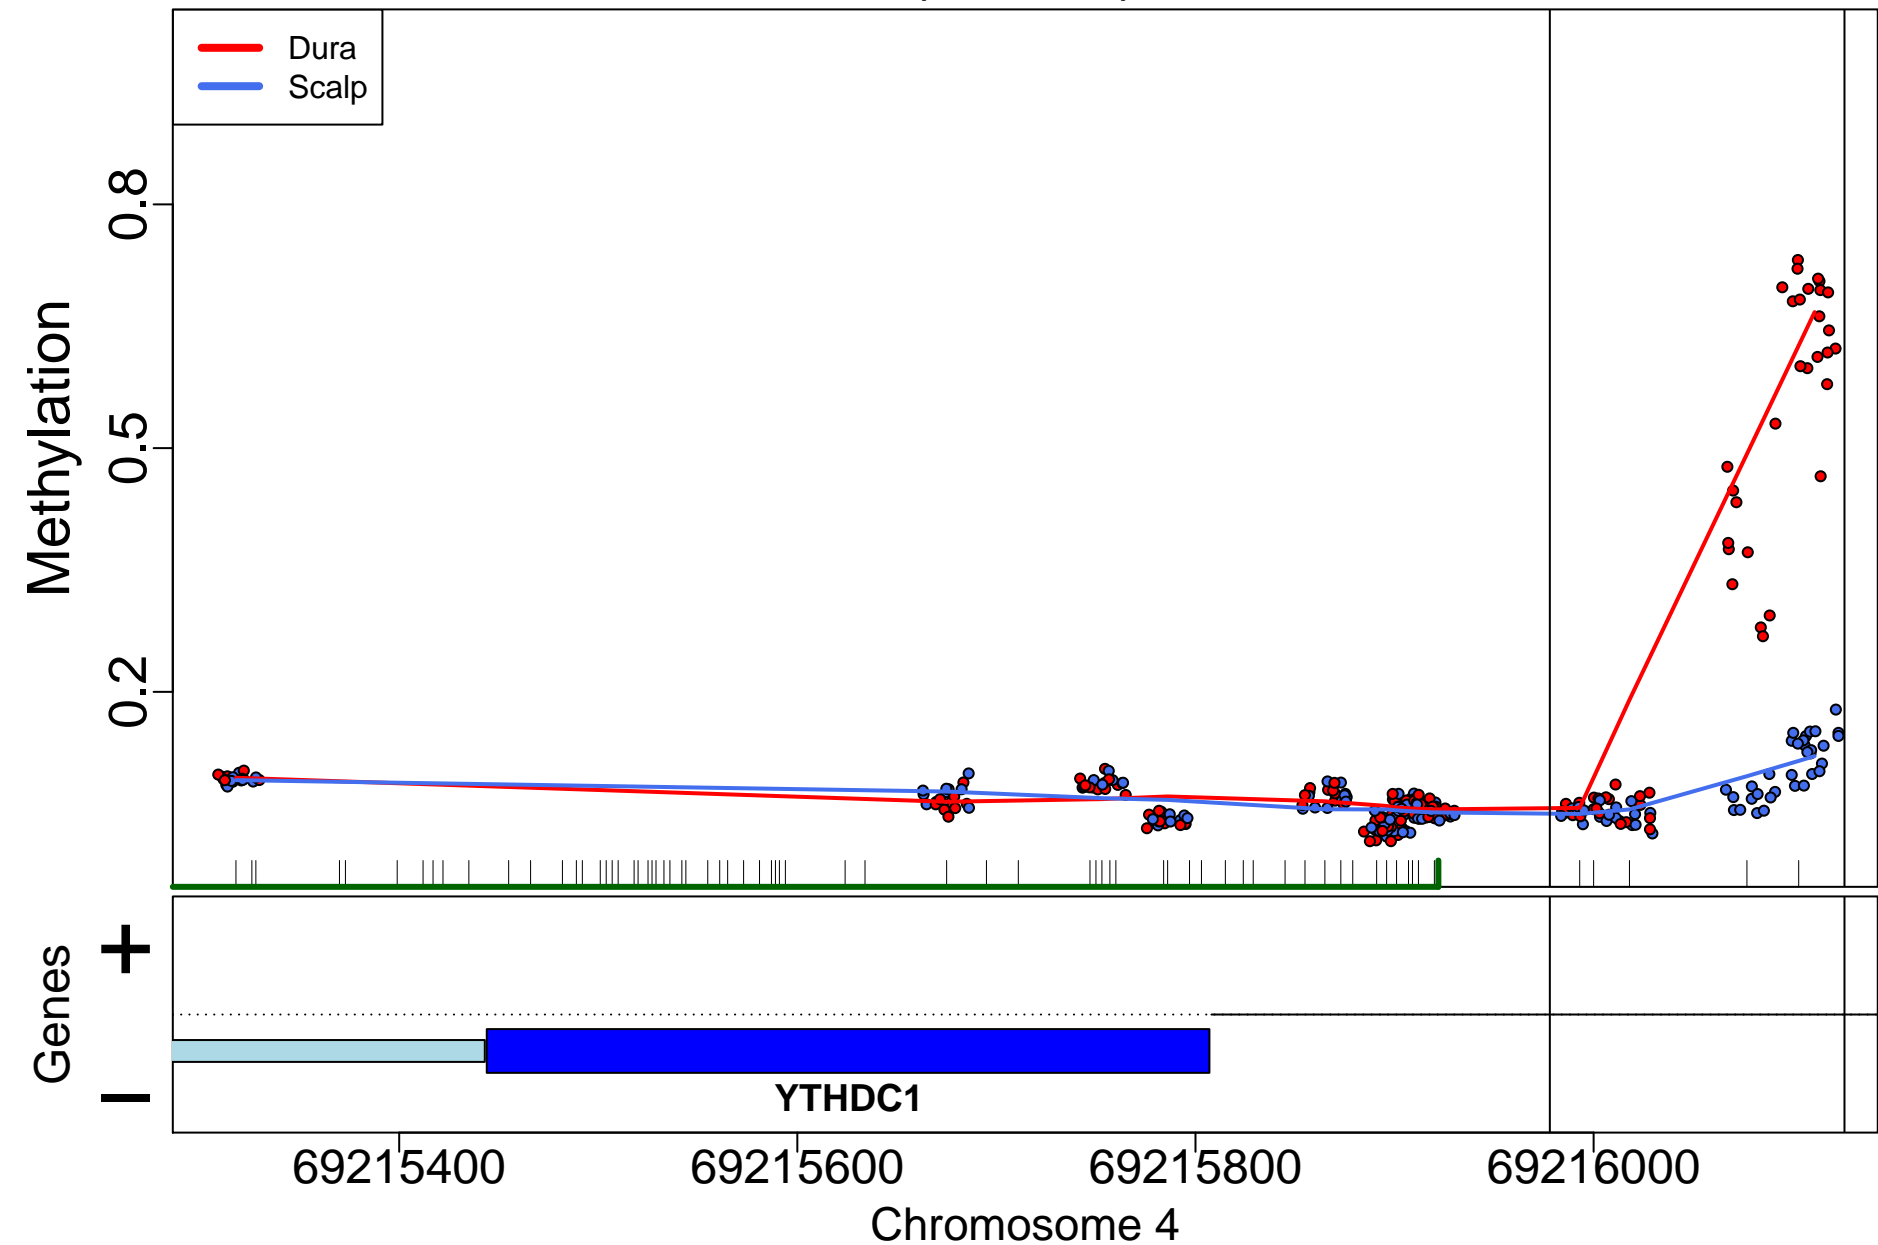

CT62; 764bp from tss:promoter

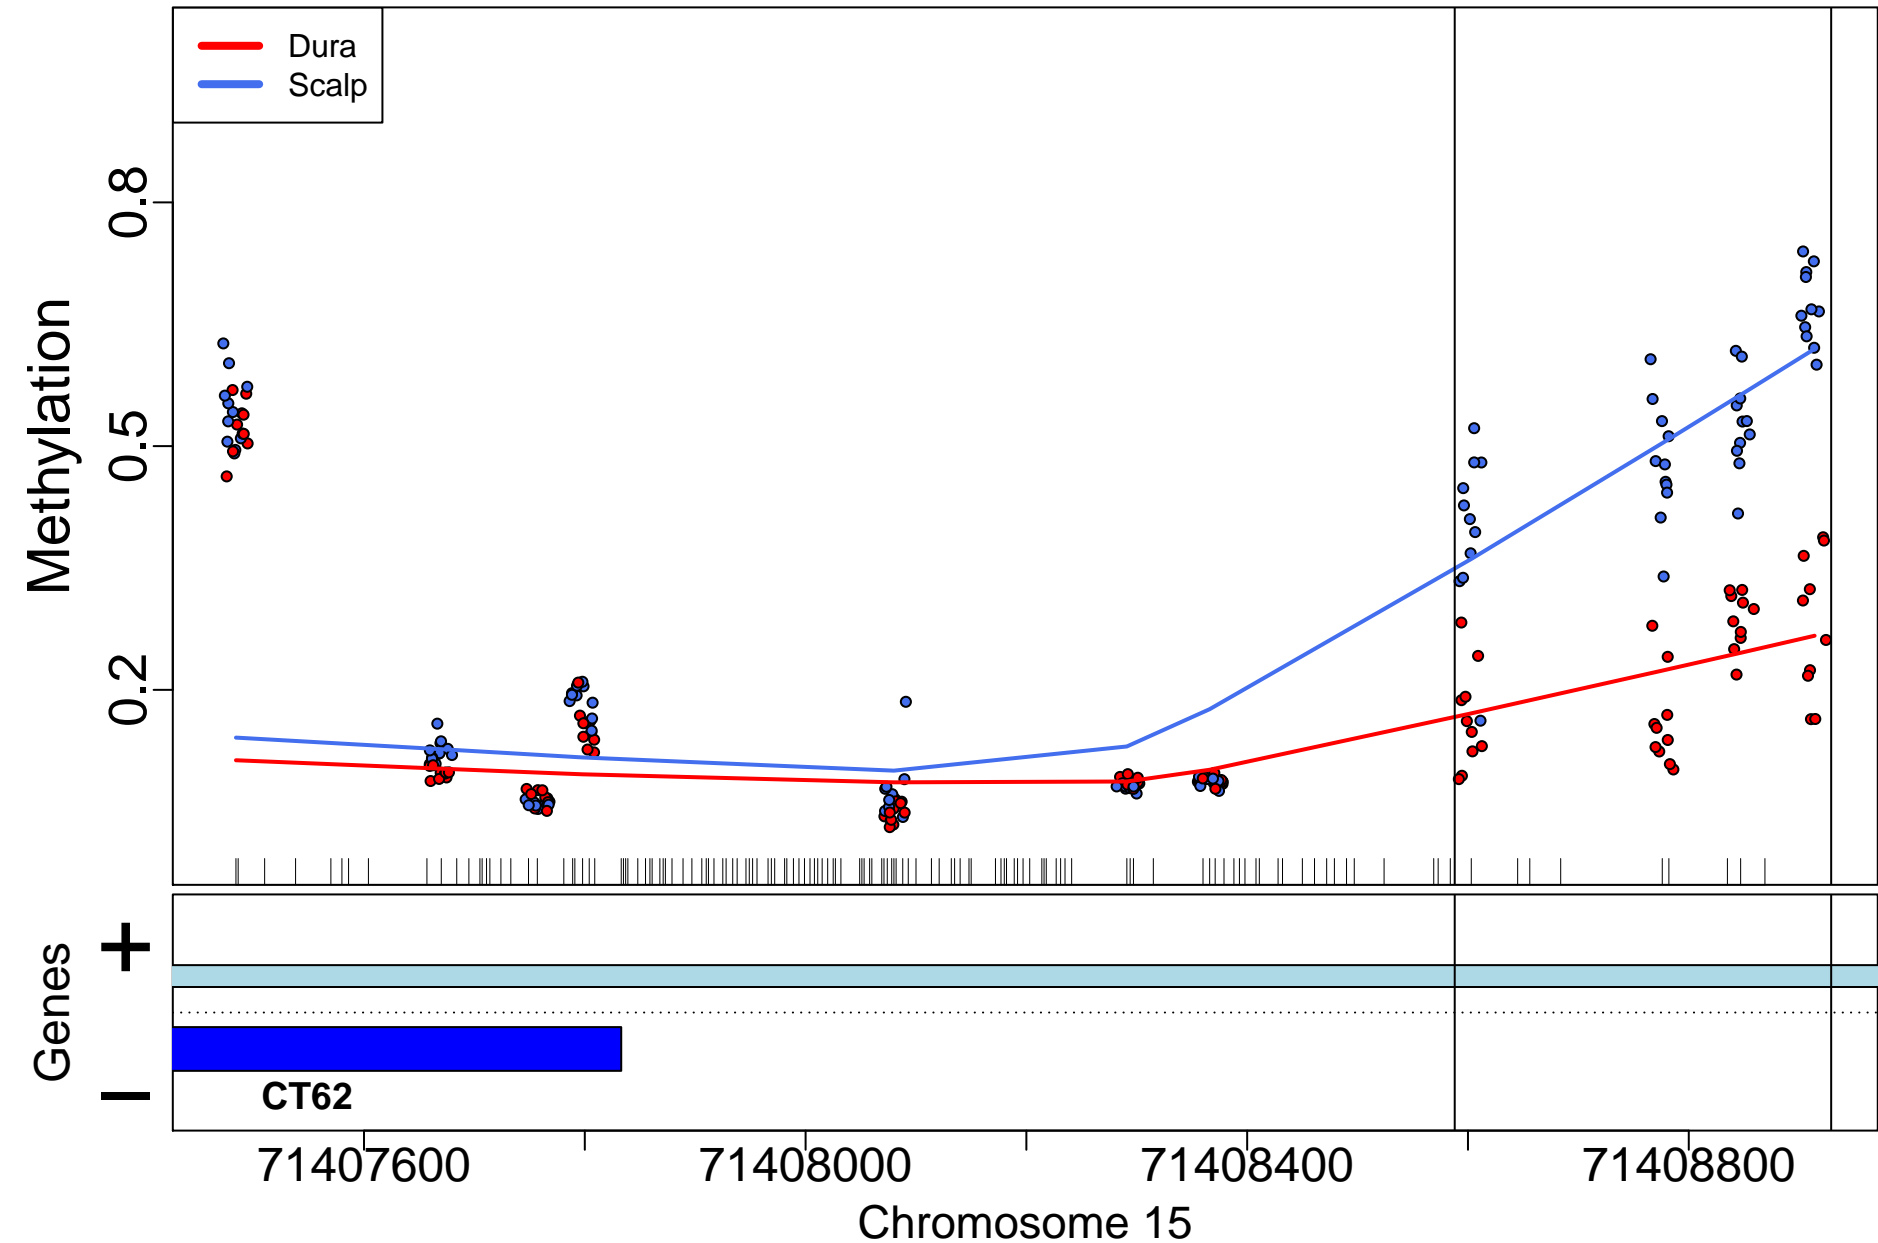

LINC01018; 0bp from tss:NA

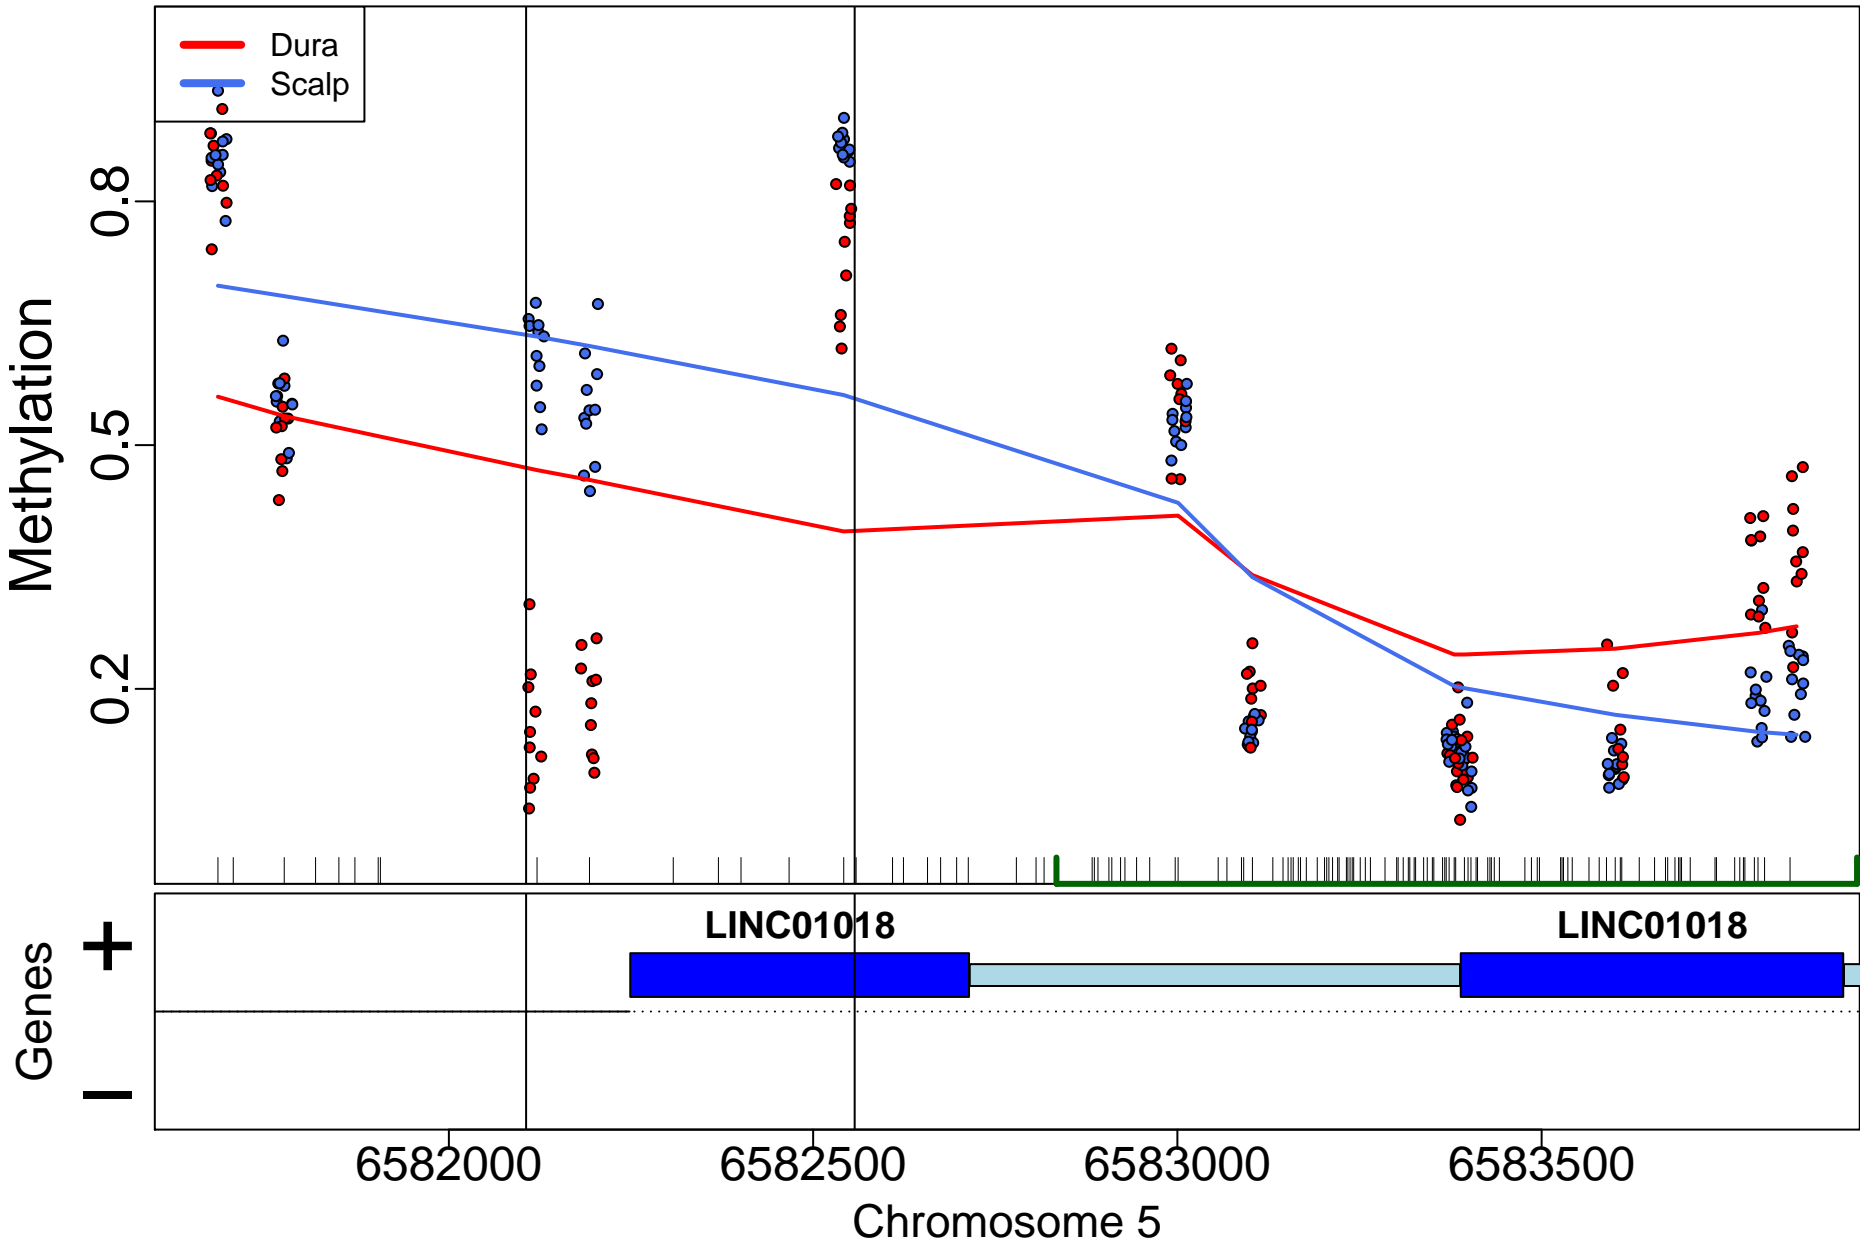

TRIM31; 0bp from tss:NA

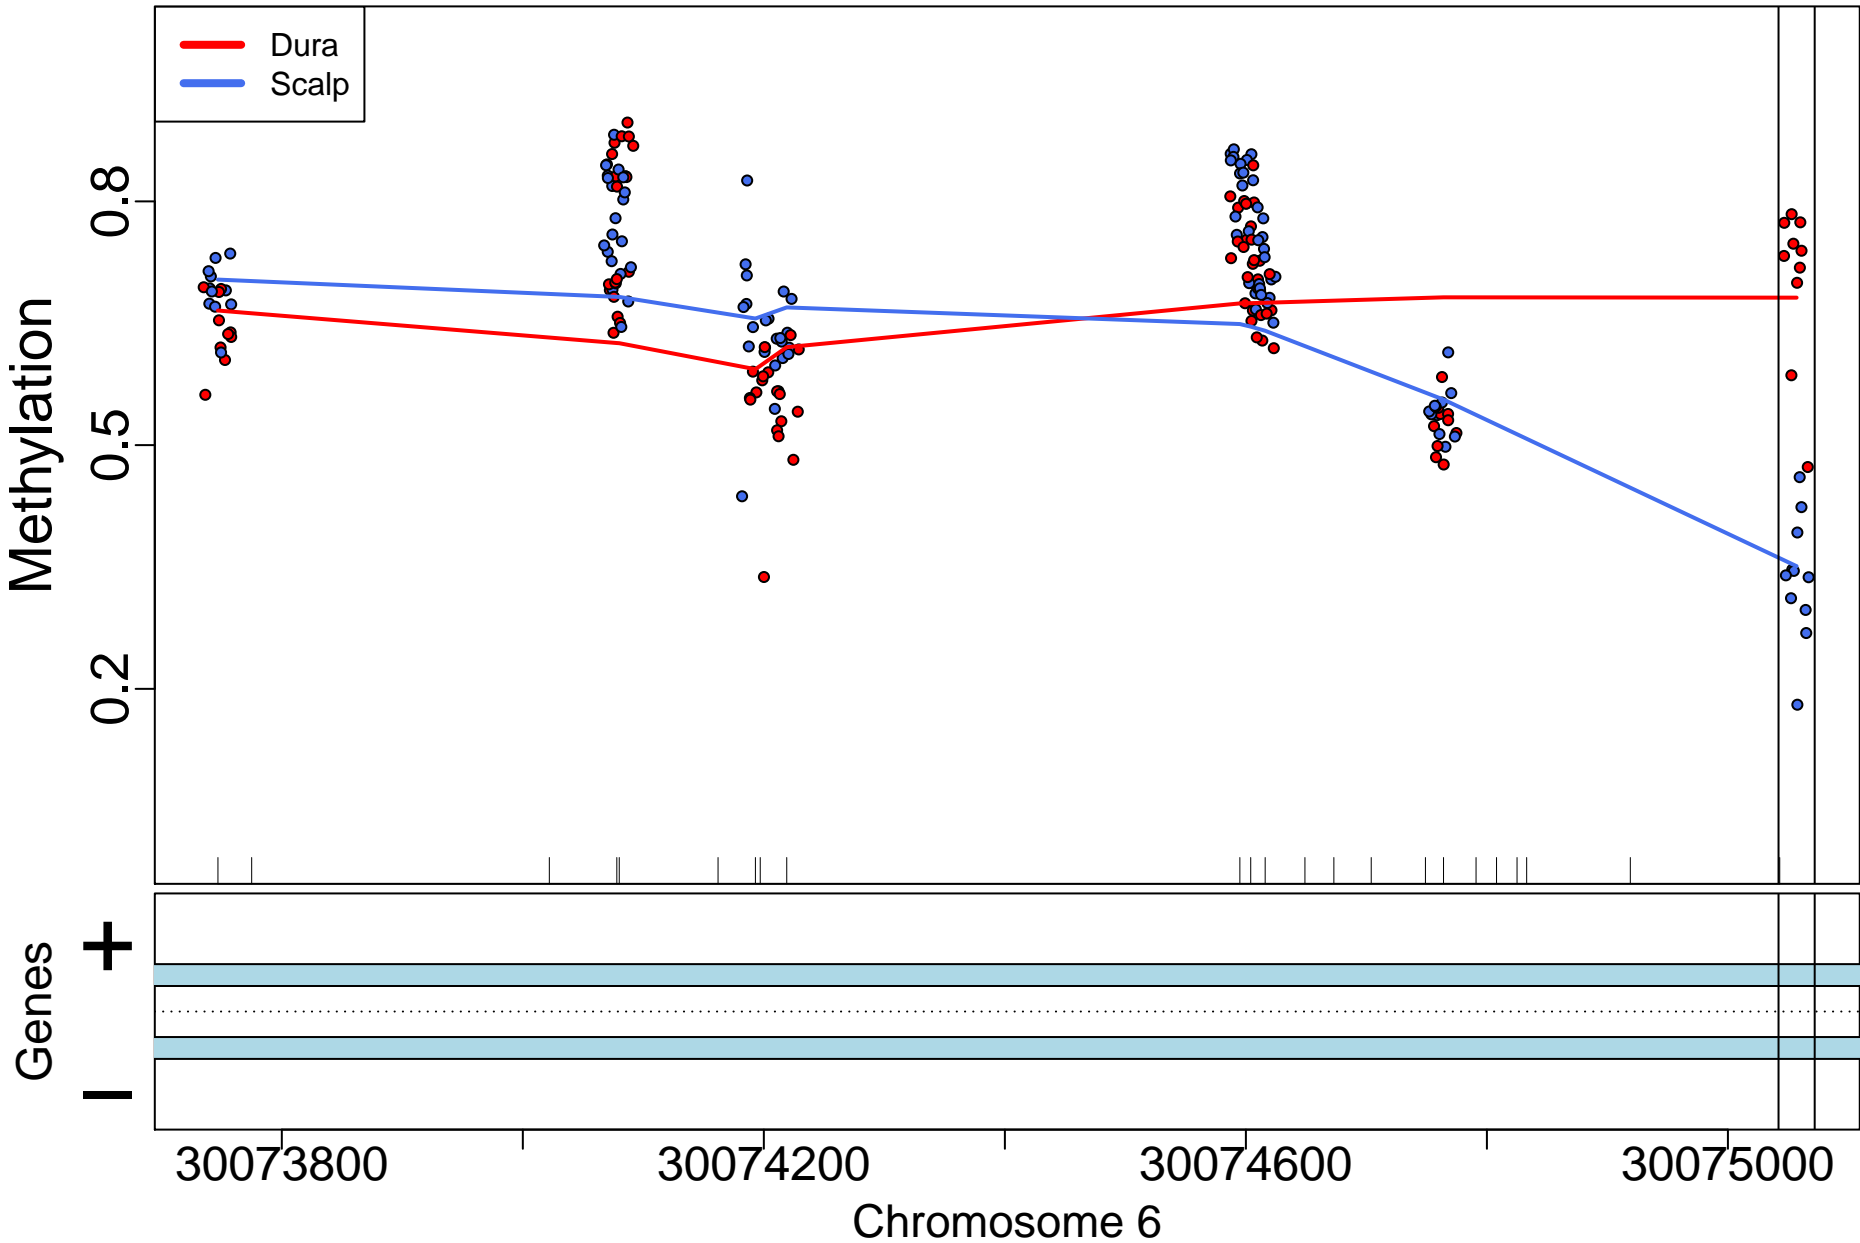



PAX6; 8546bp from tss:inside intron

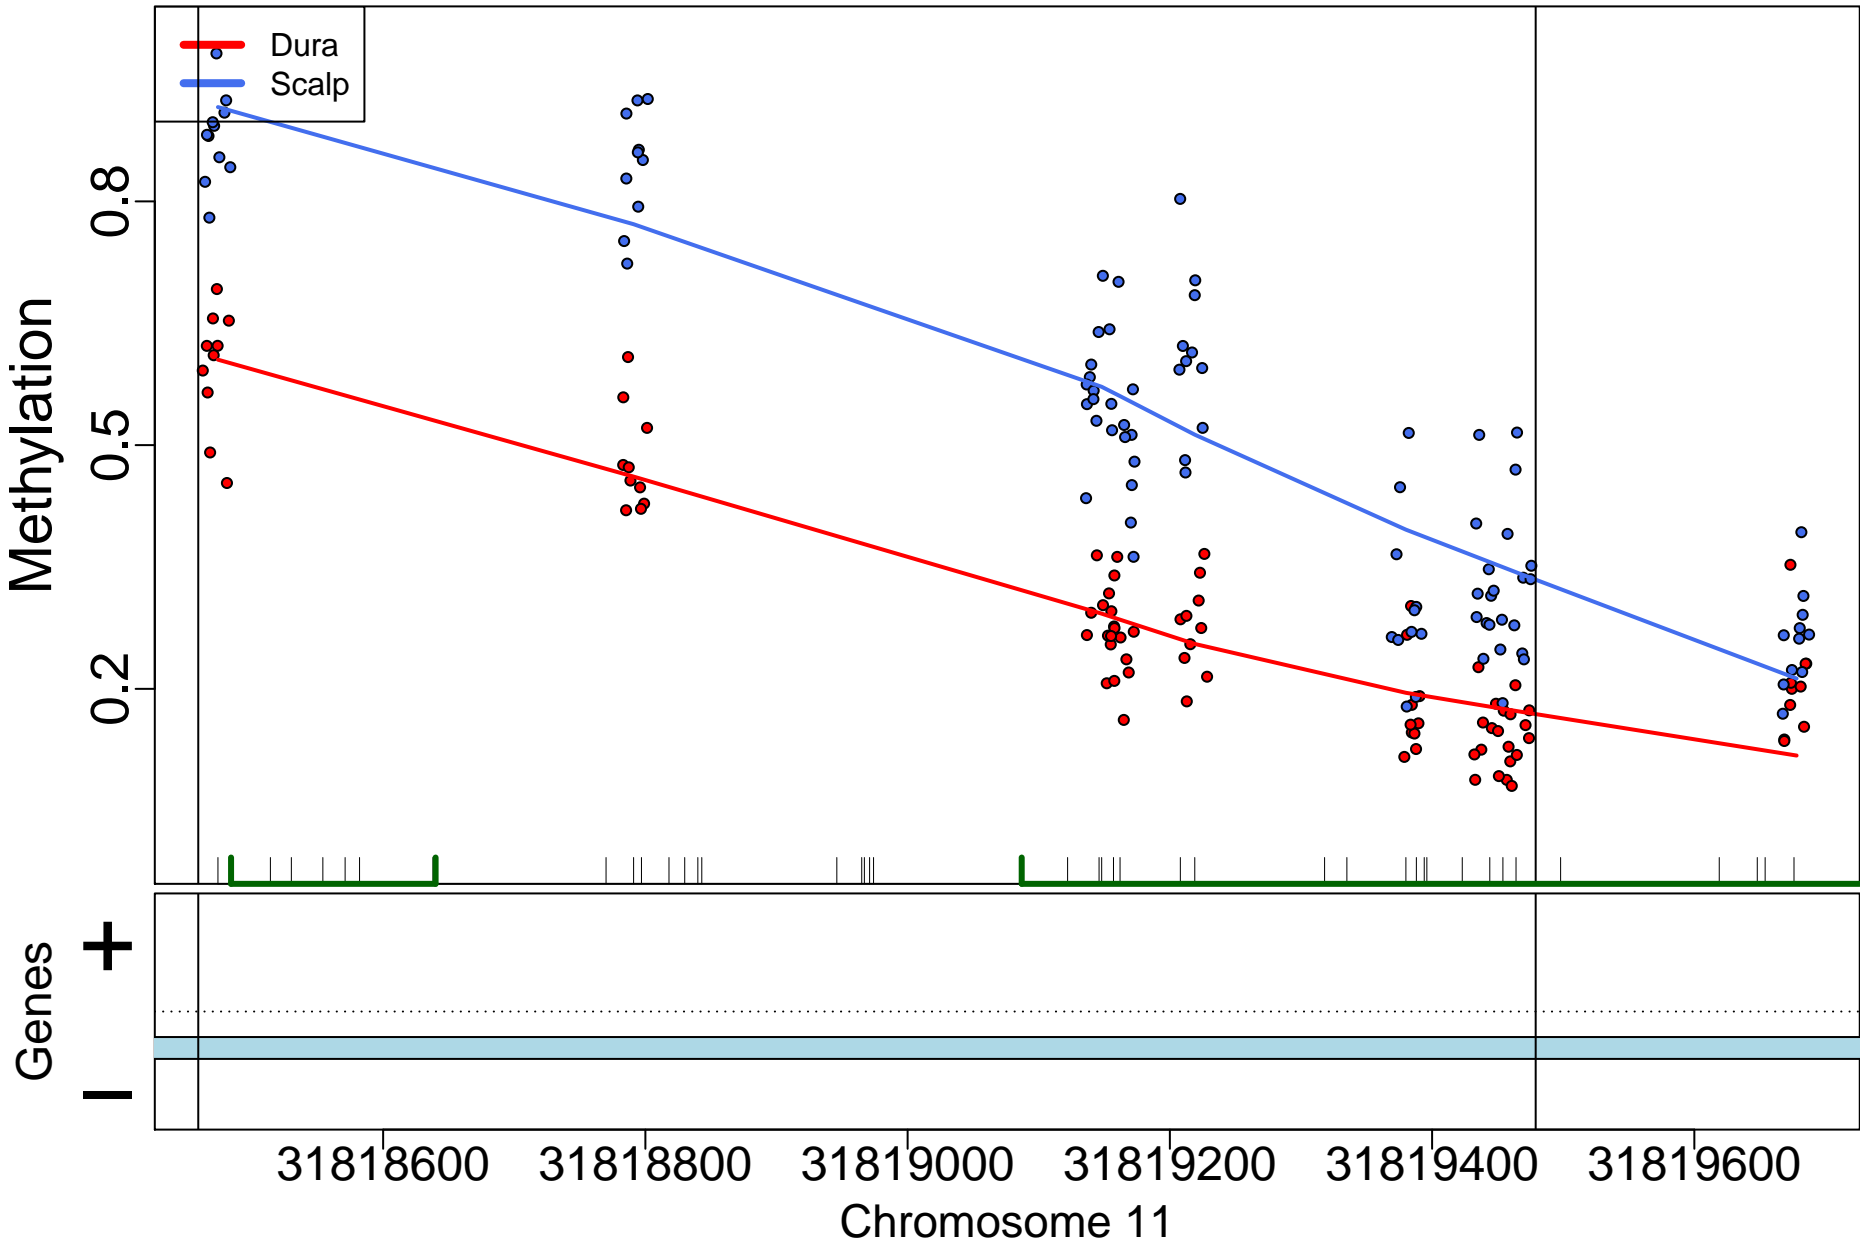

WFDC5; 0bp from tss:overlaps 5'

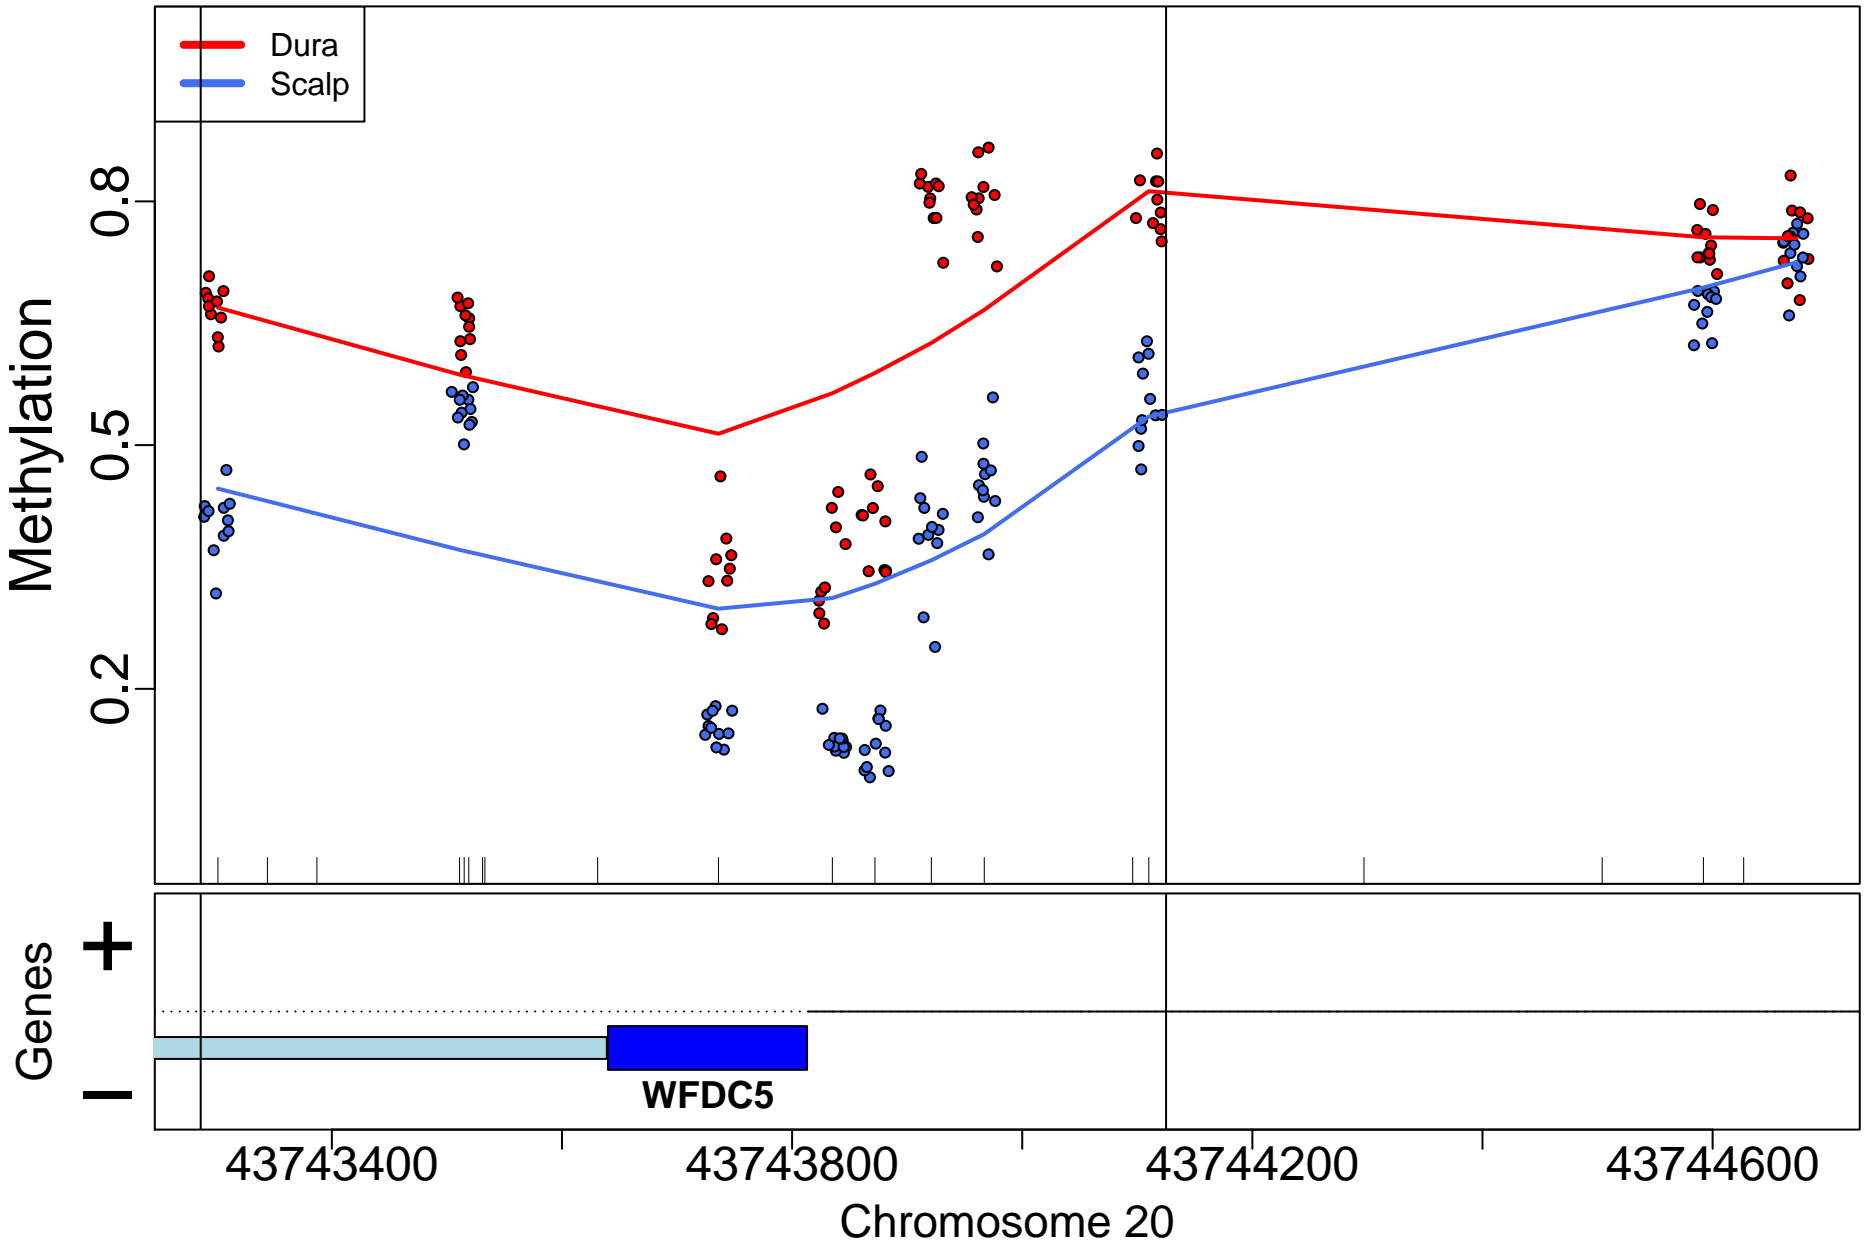

SP9; 5023bp from tss:downstream

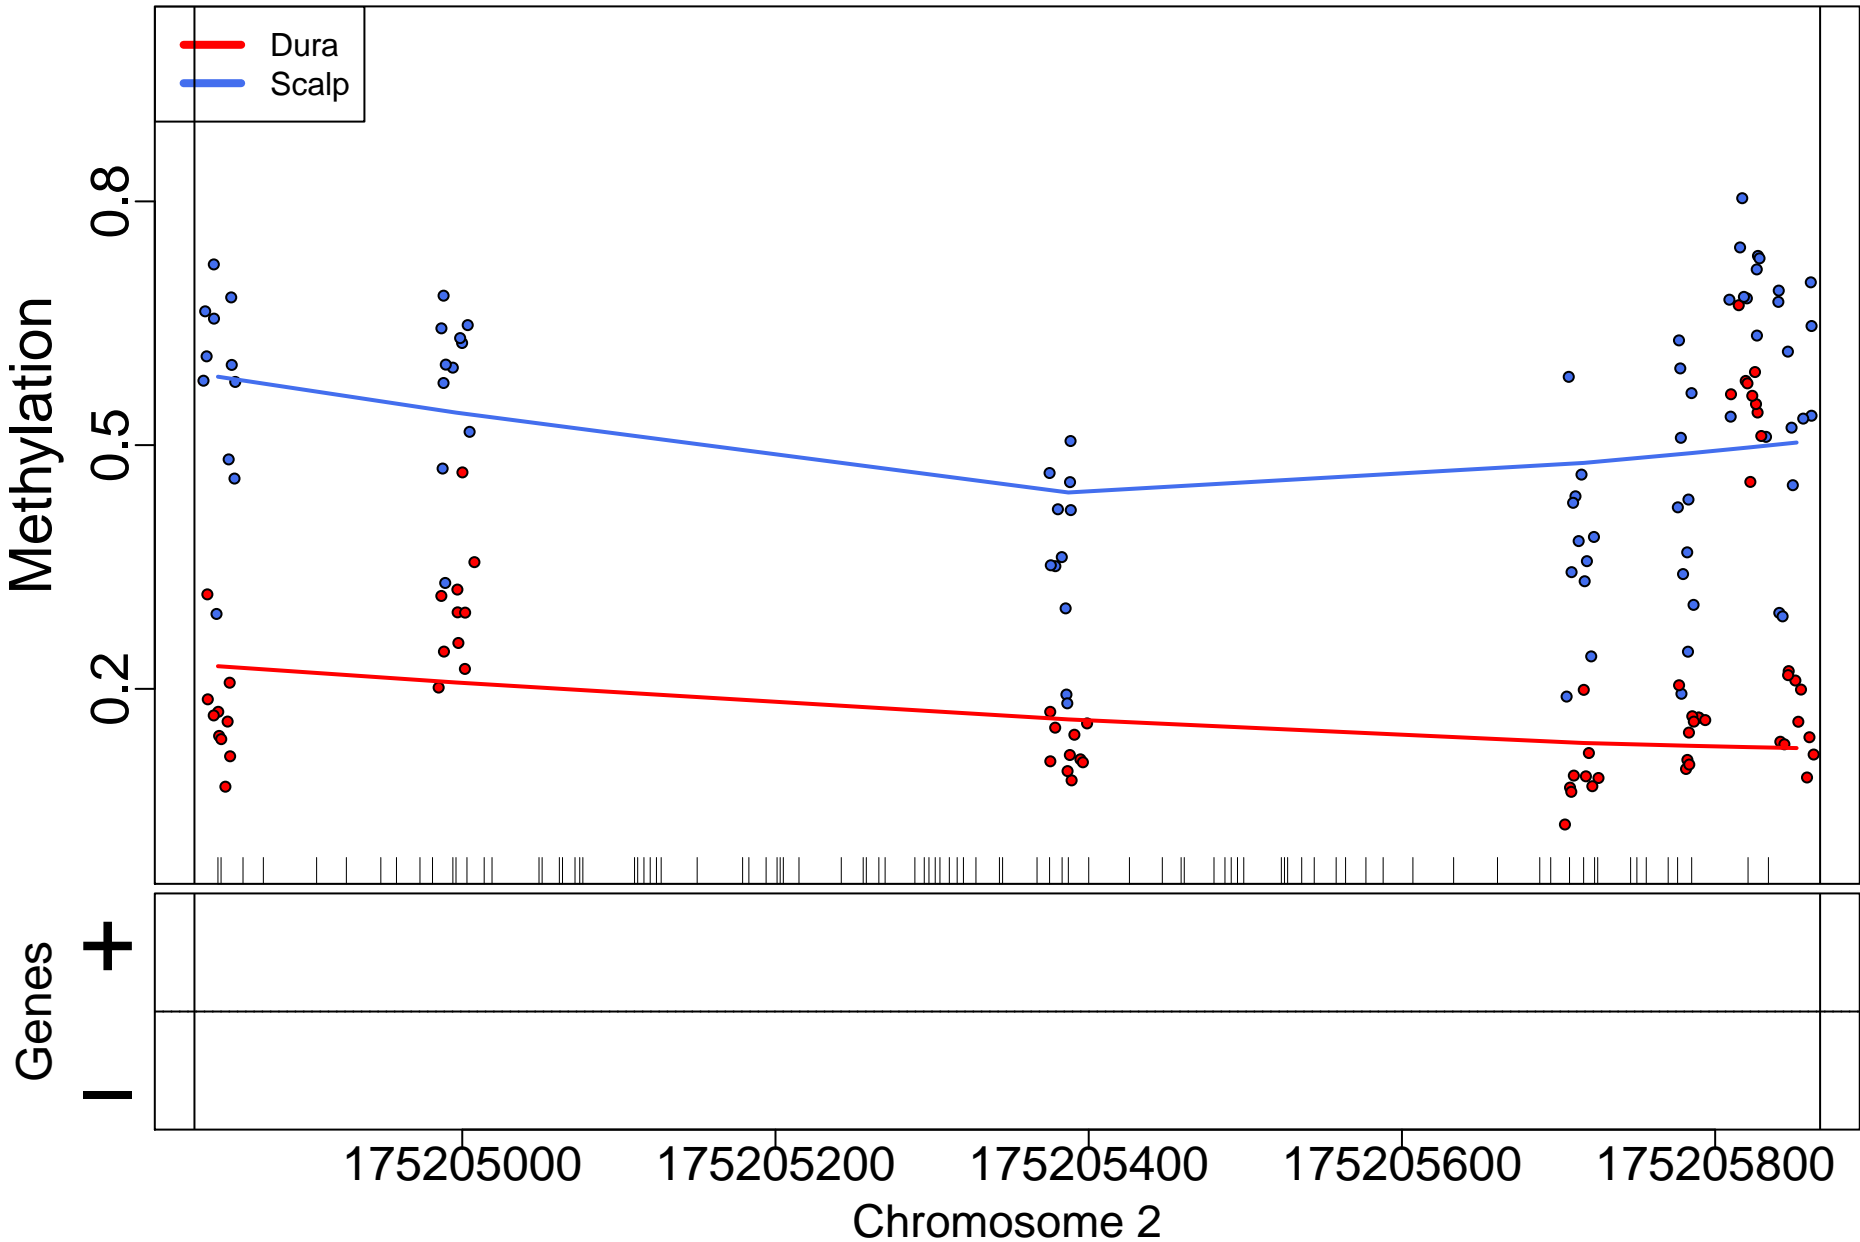

ARHGAP23; 43436bp from tss:overlaps exon upstream

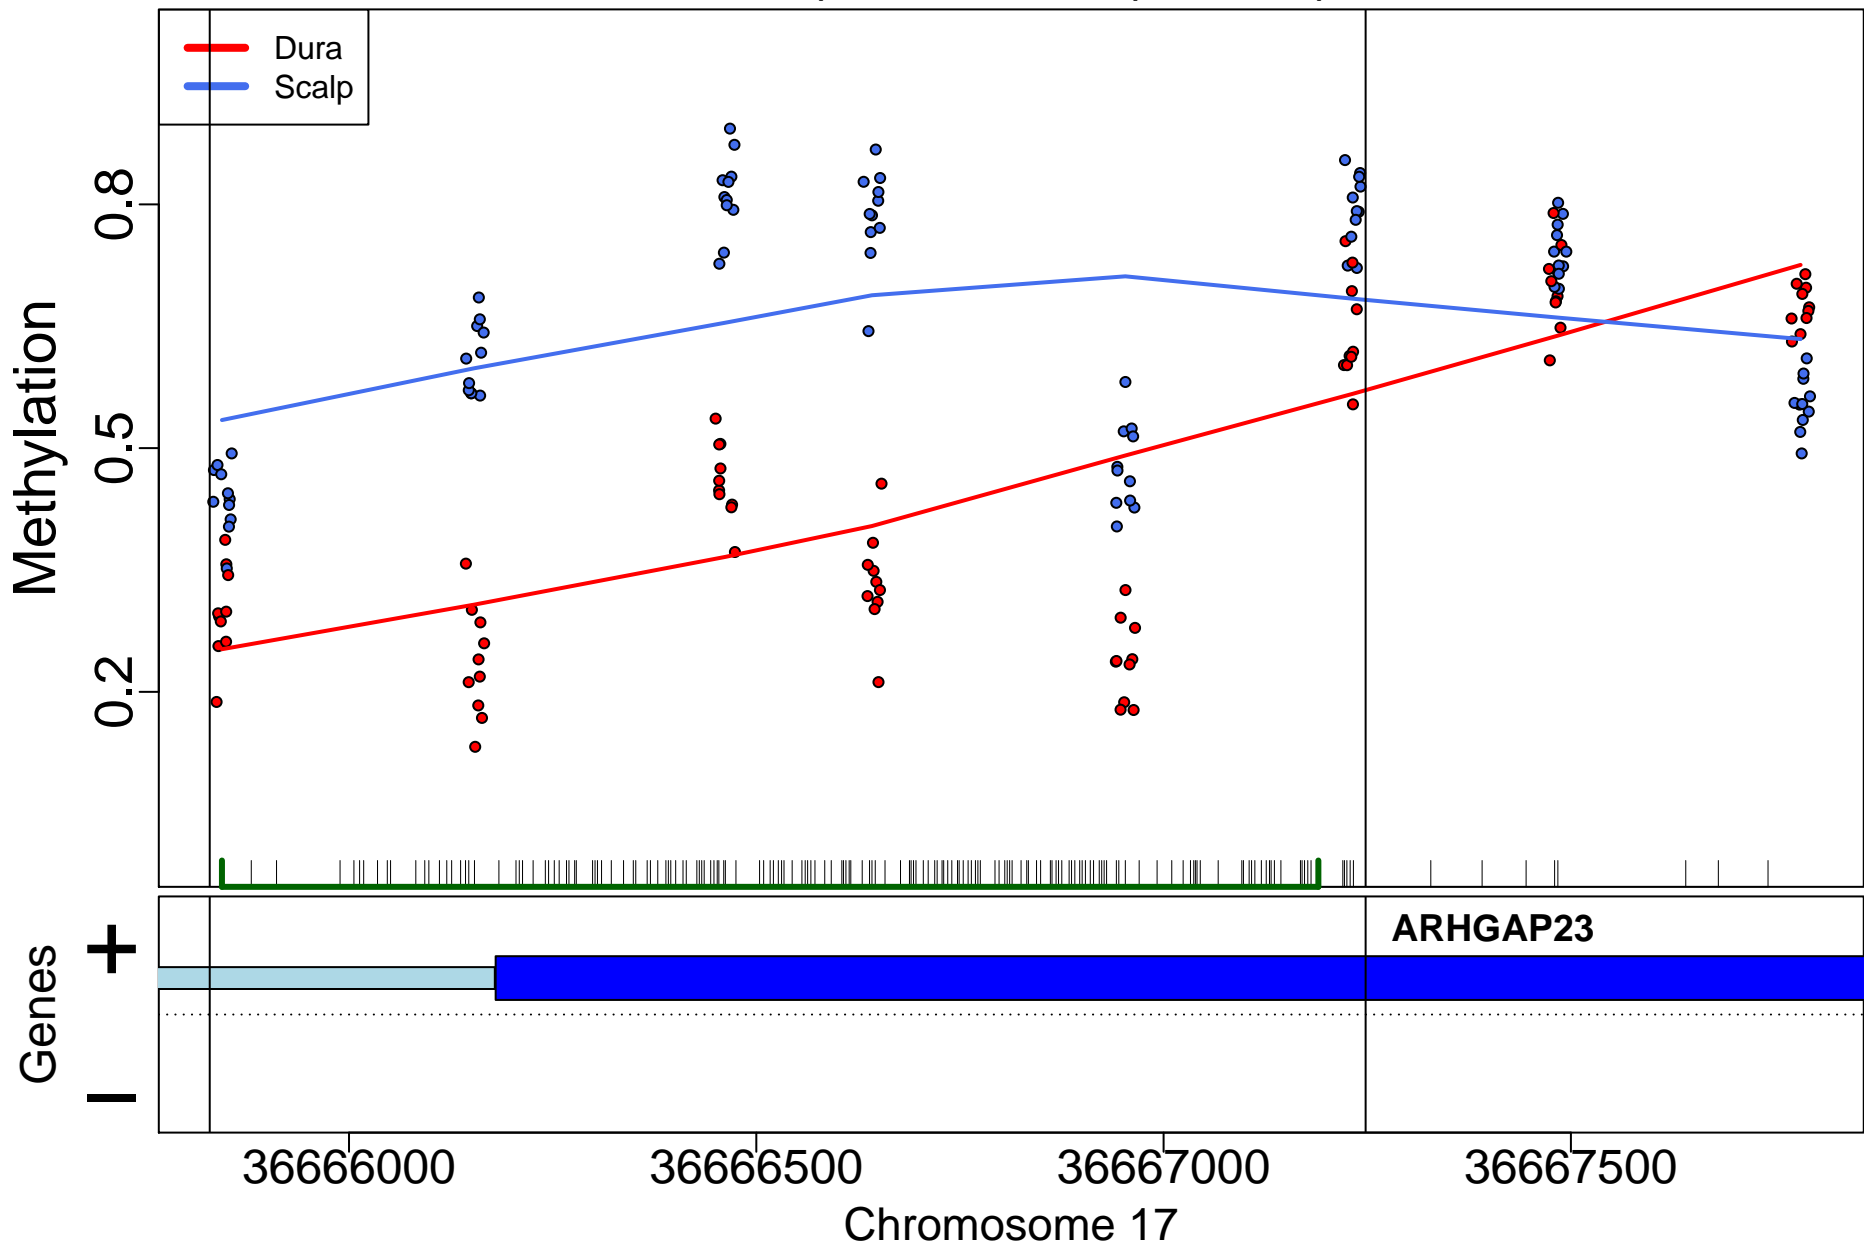



# PDE5A; 2035bp from tss:inside intron

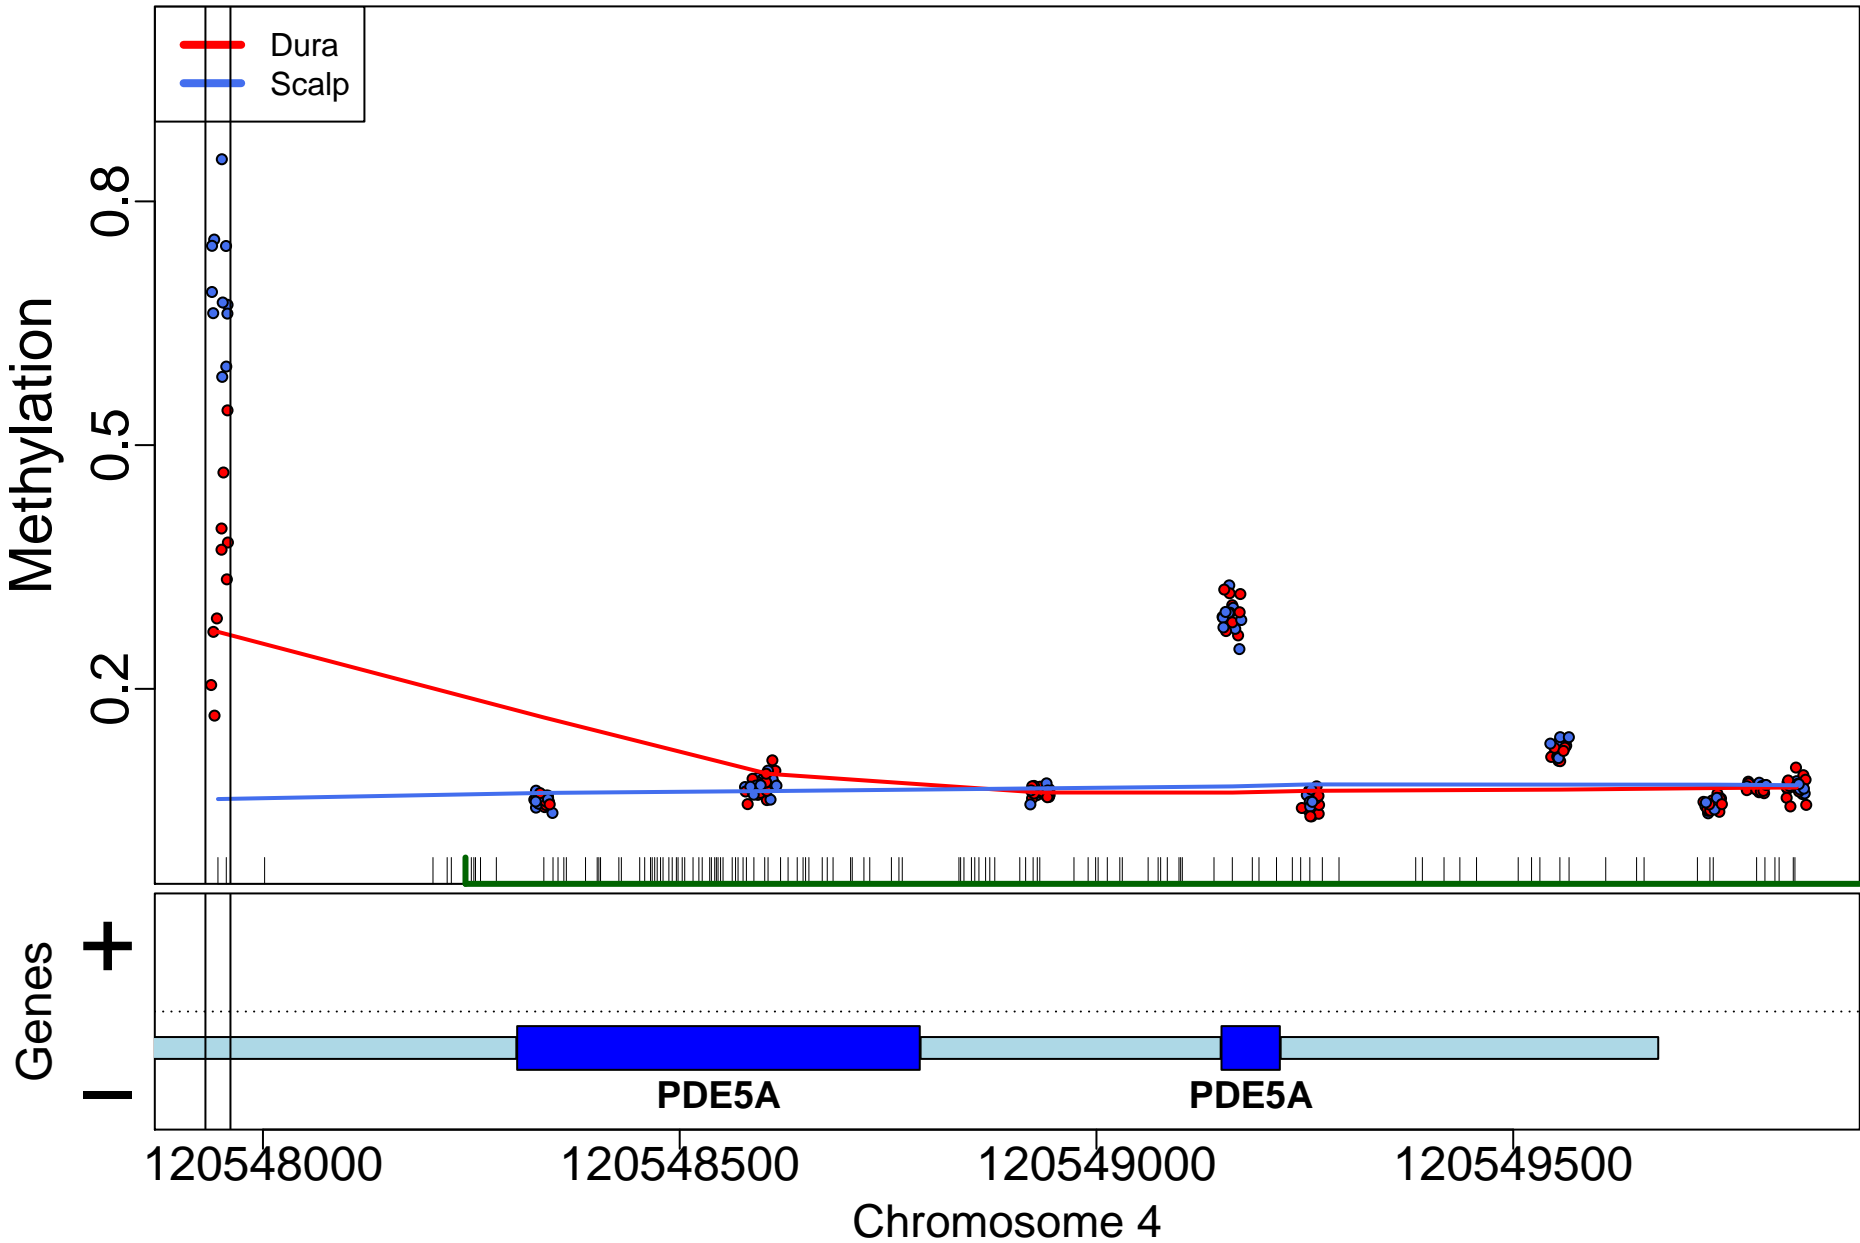

INHBA-AS1; 0bp from tss:NA

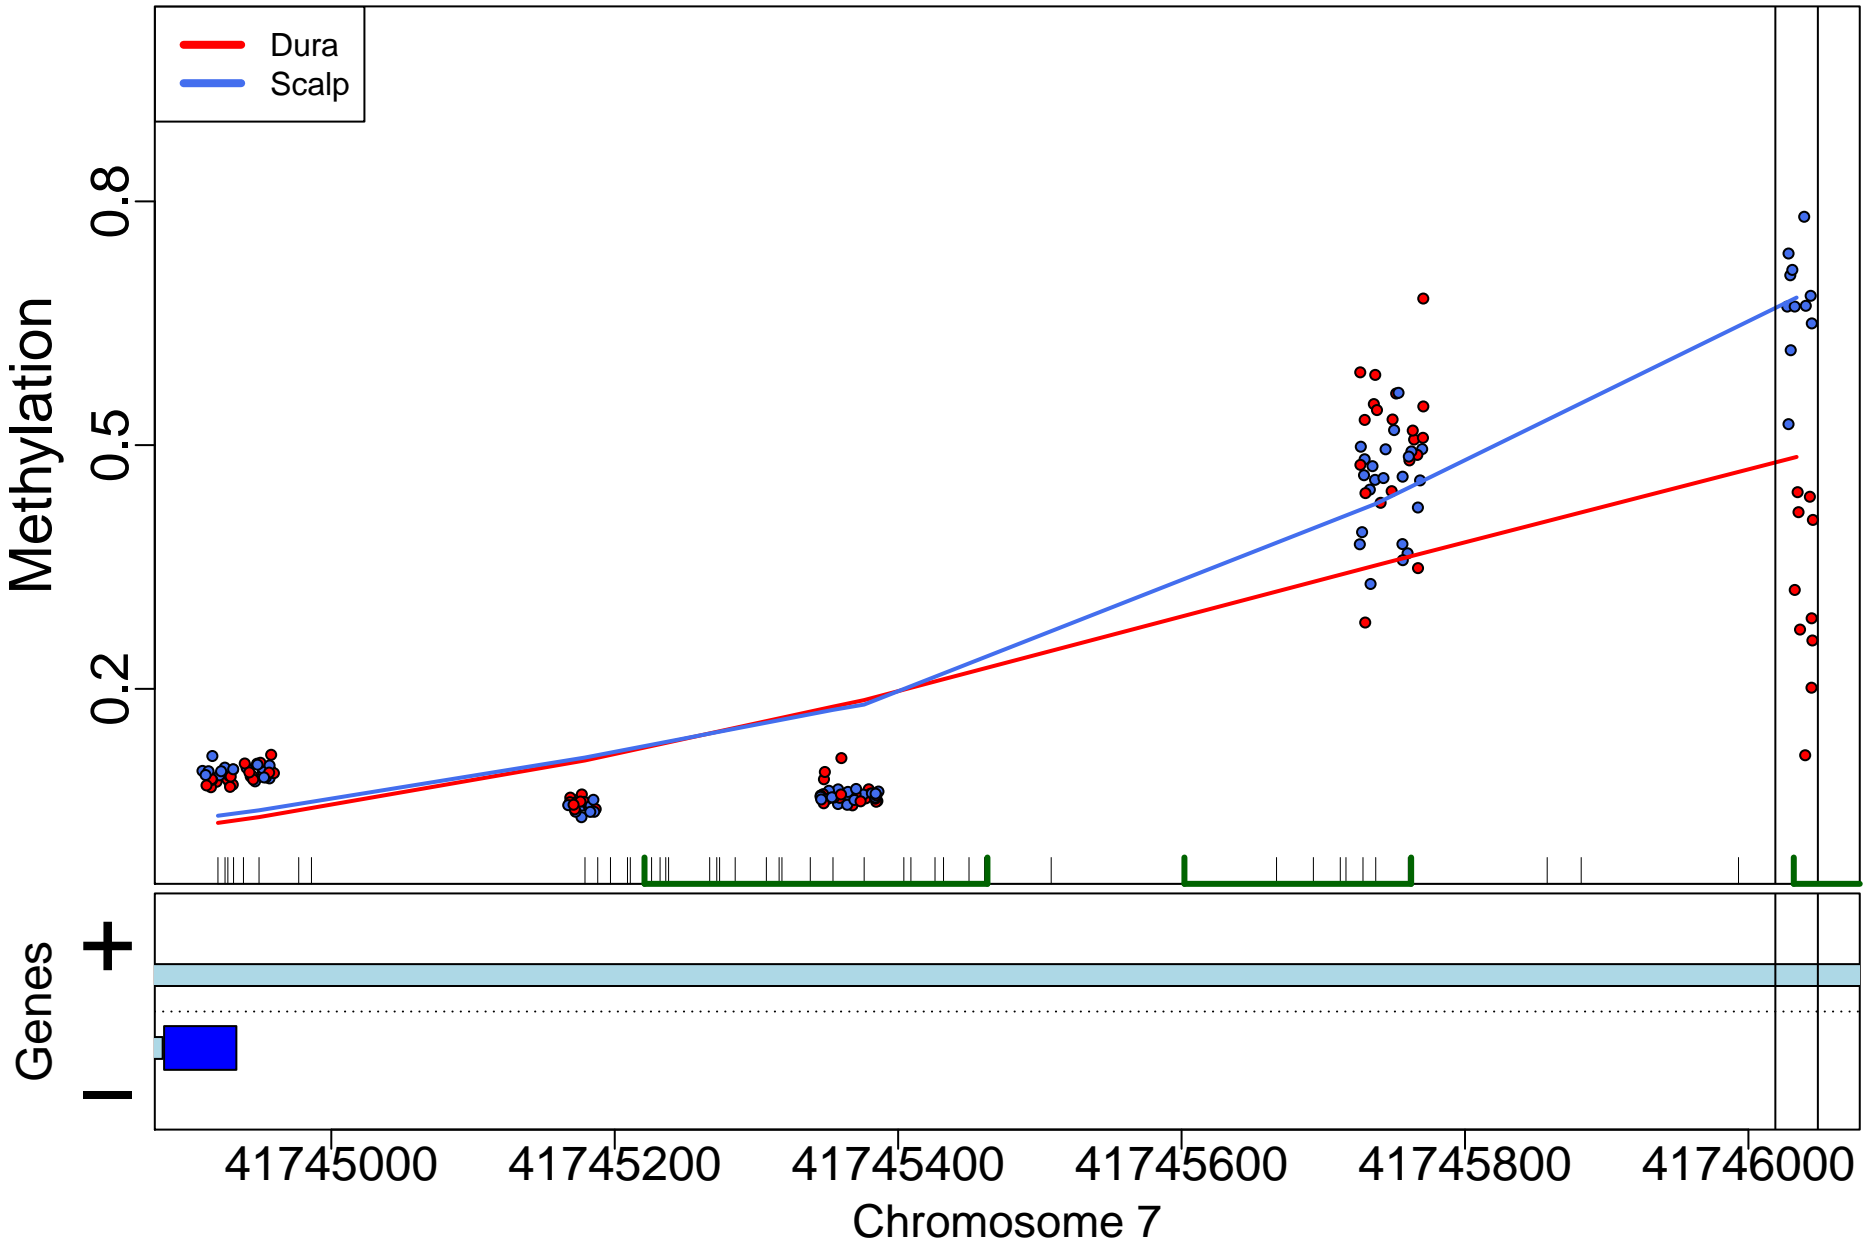

LMX1A; 1273bp from tss:covers exon(s)

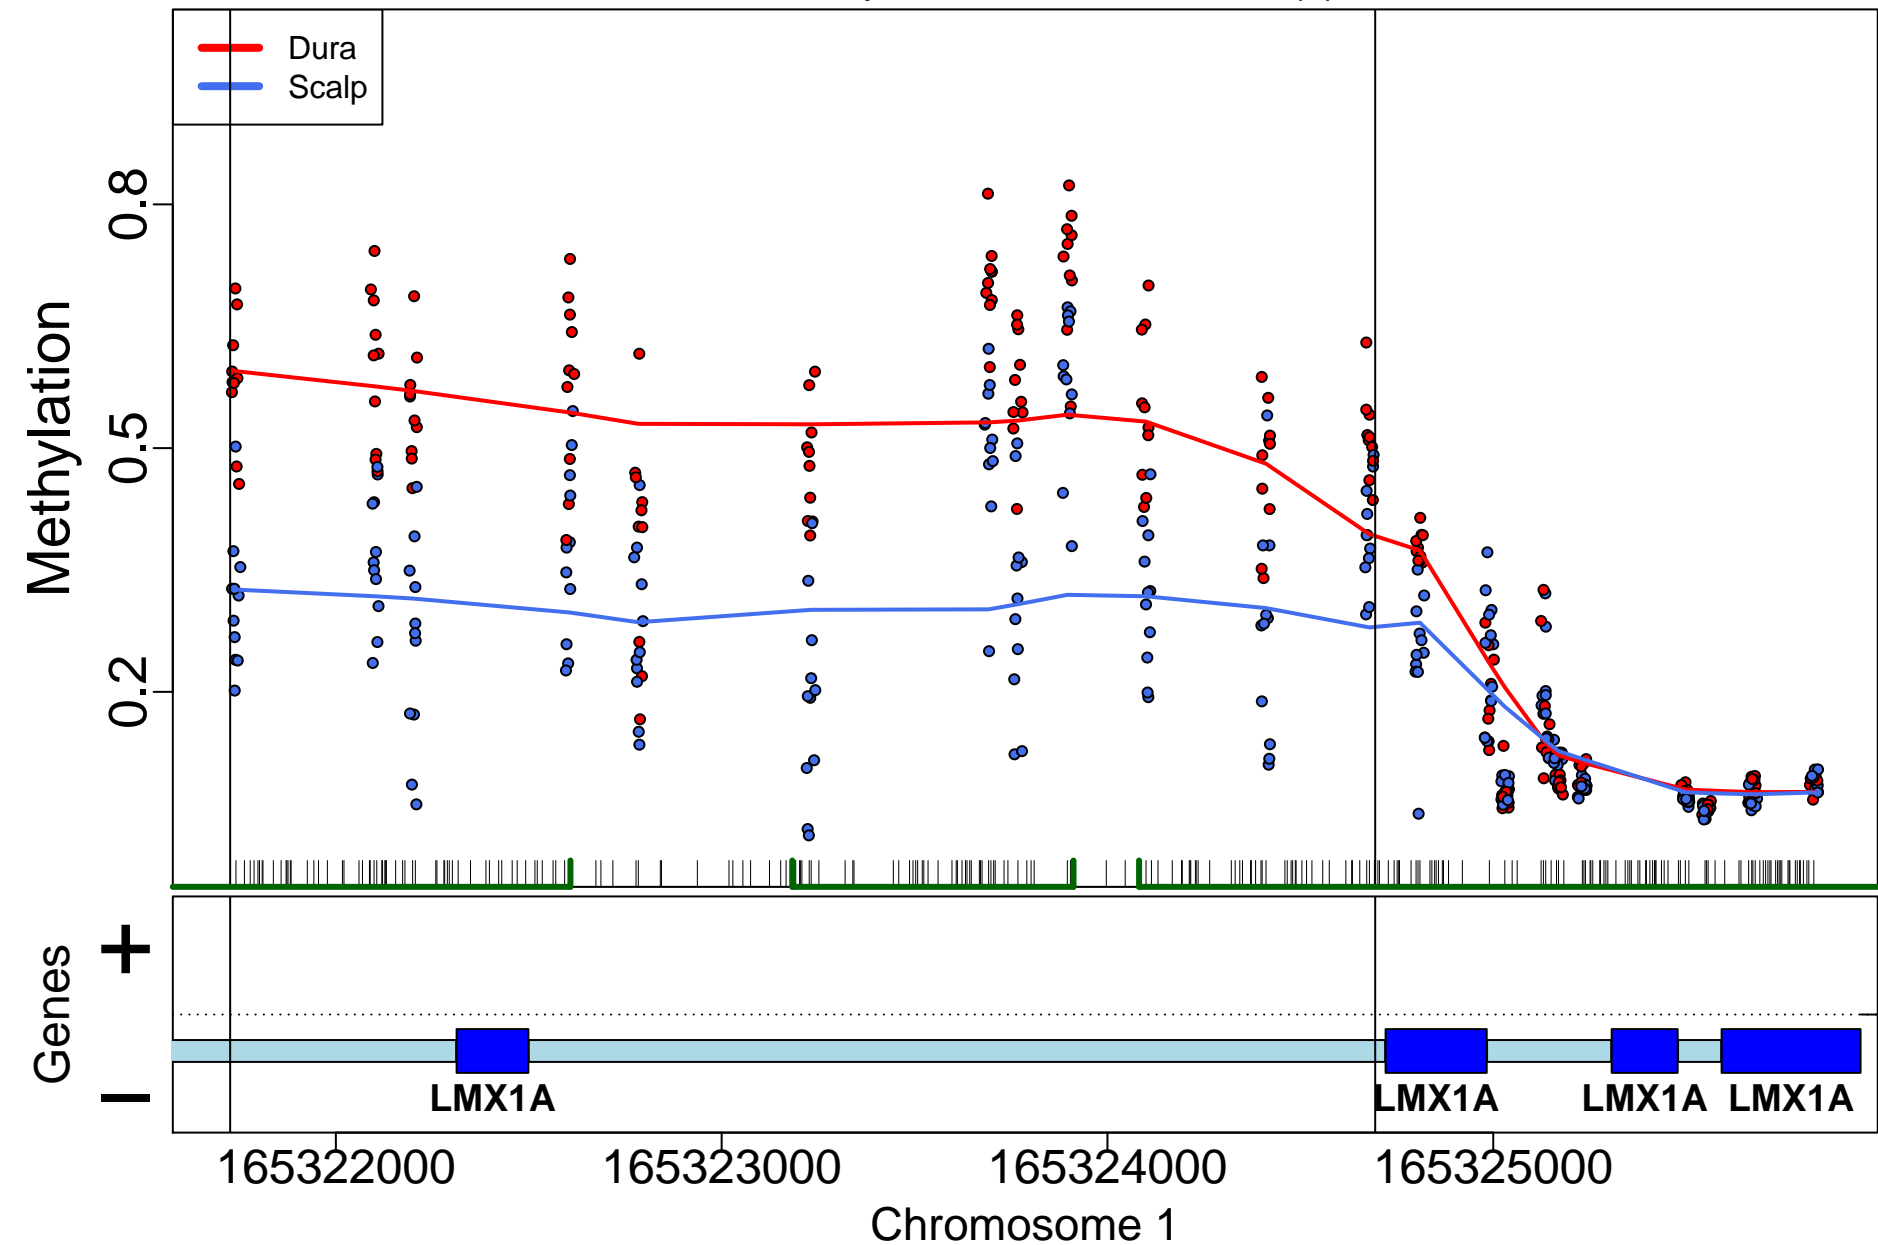



LOC401463; 0bp from tss:NA

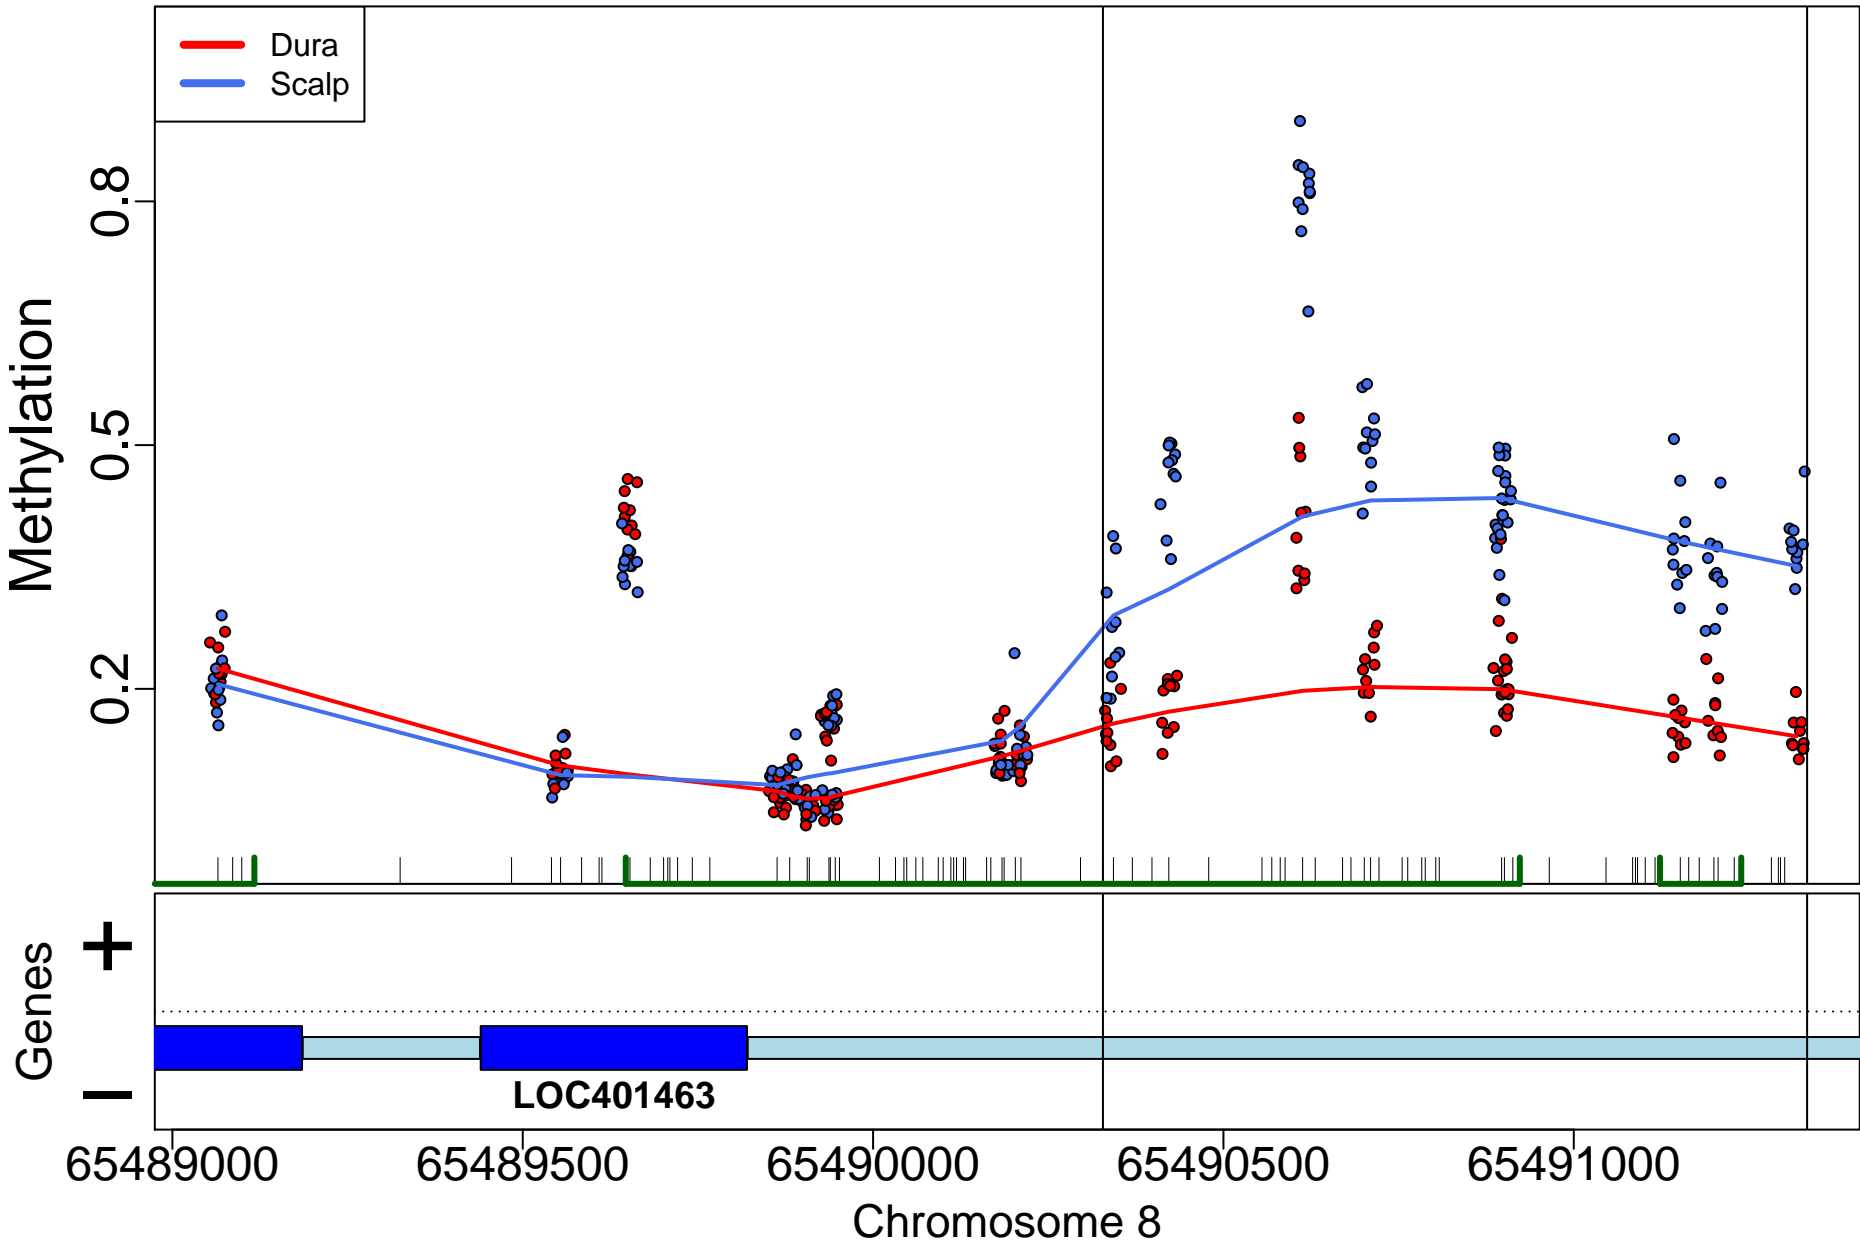

TWIST2; 42767bp from tss:inside intron

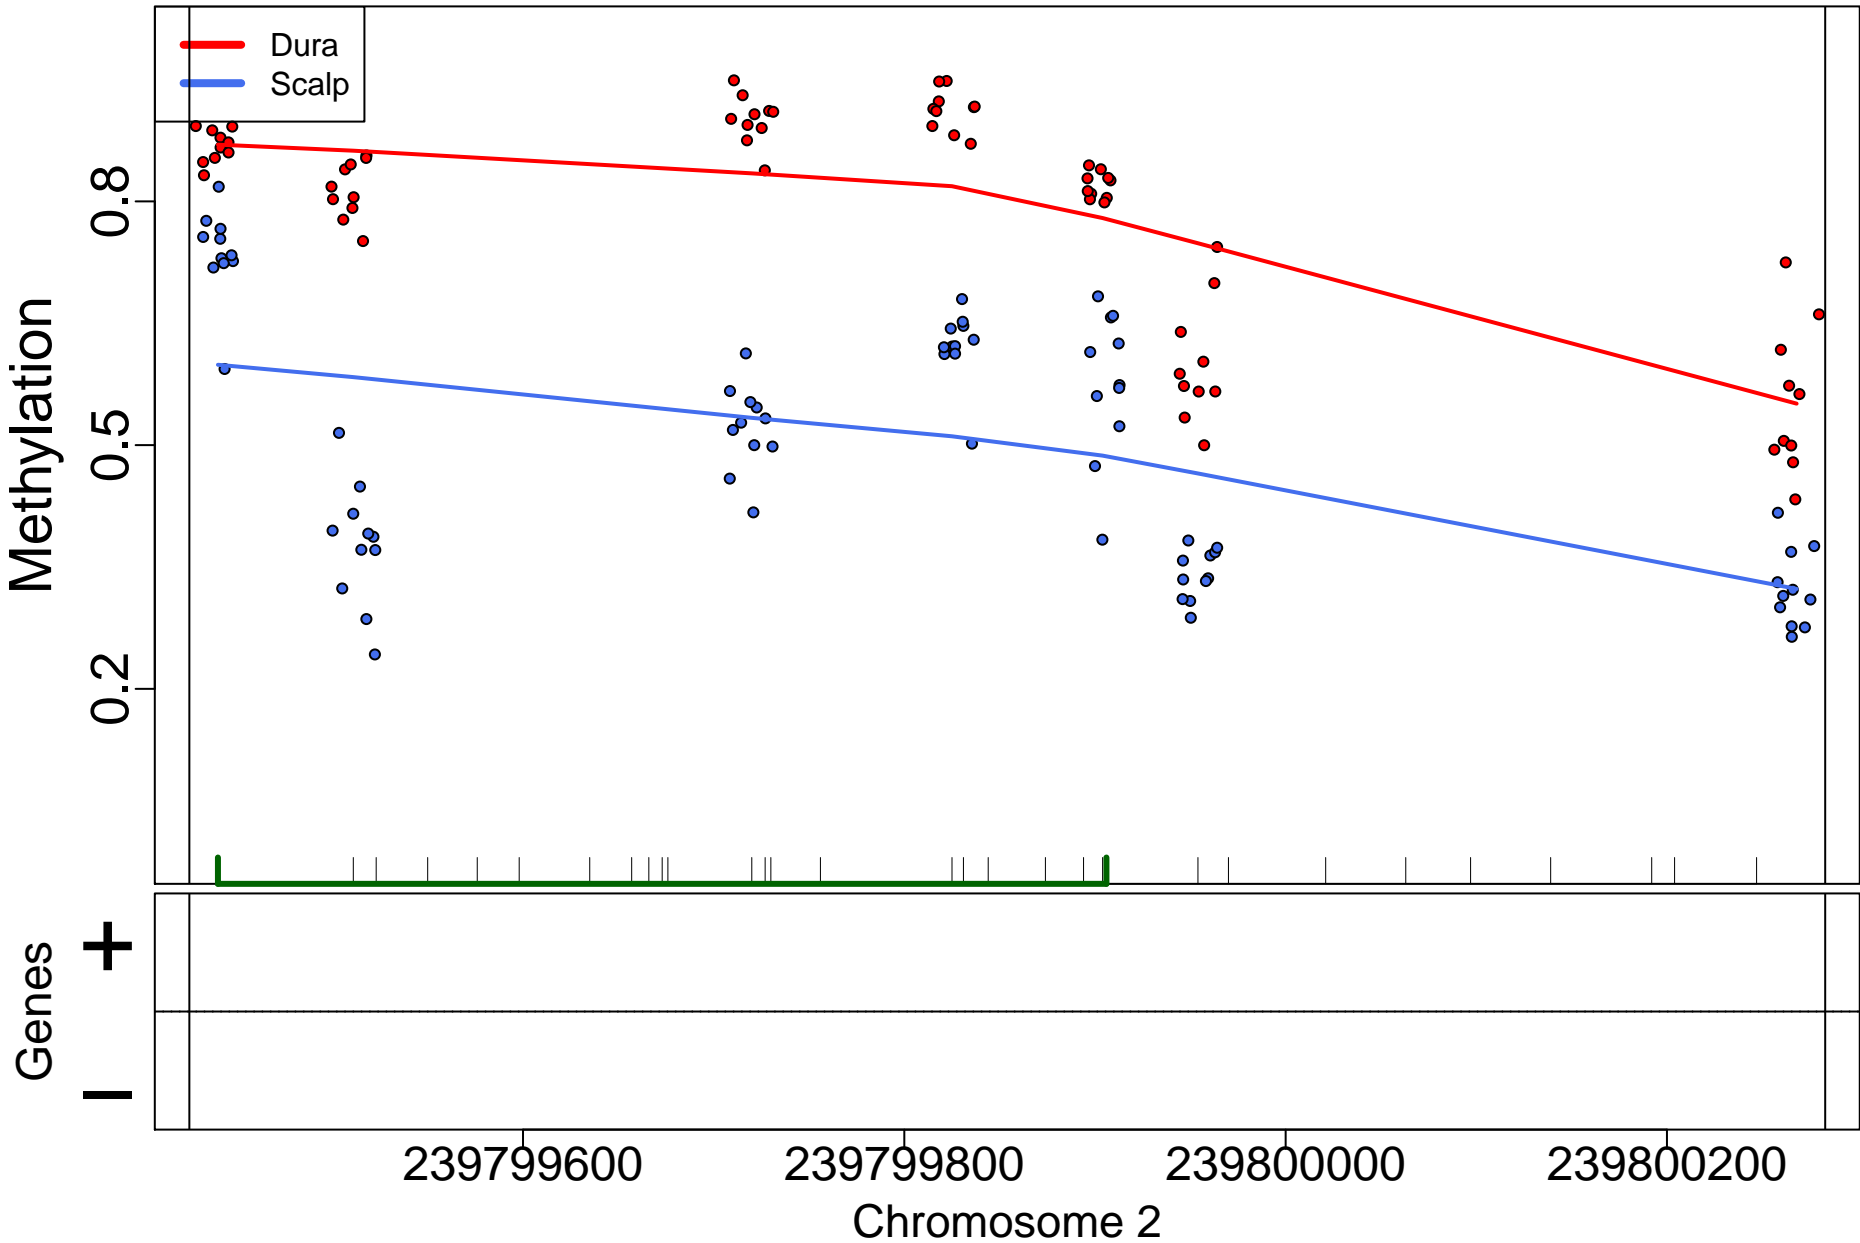

GDNF; 4614bp from tss:covers exon(s)

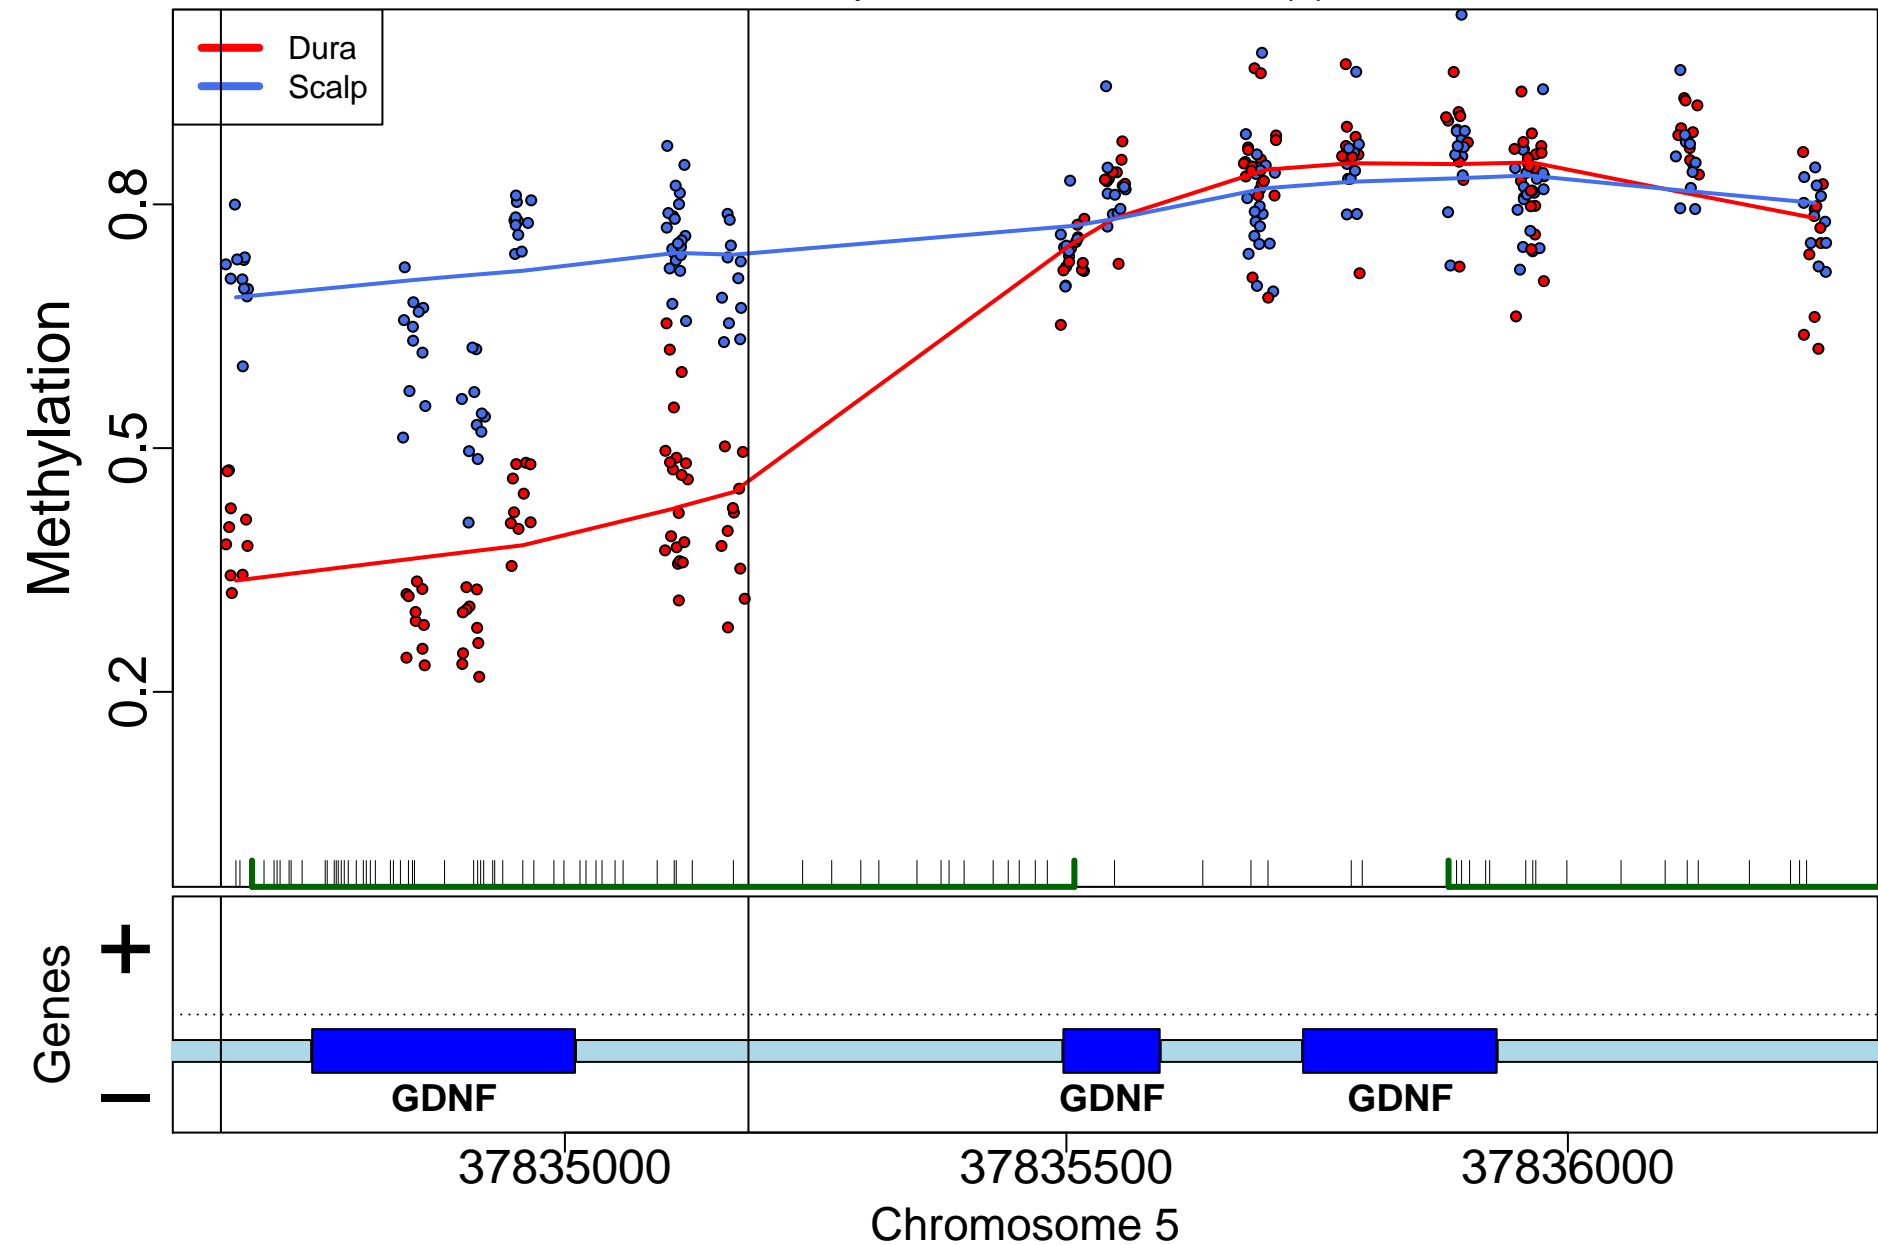

## SHISA3; 882bp from tss:inside intron

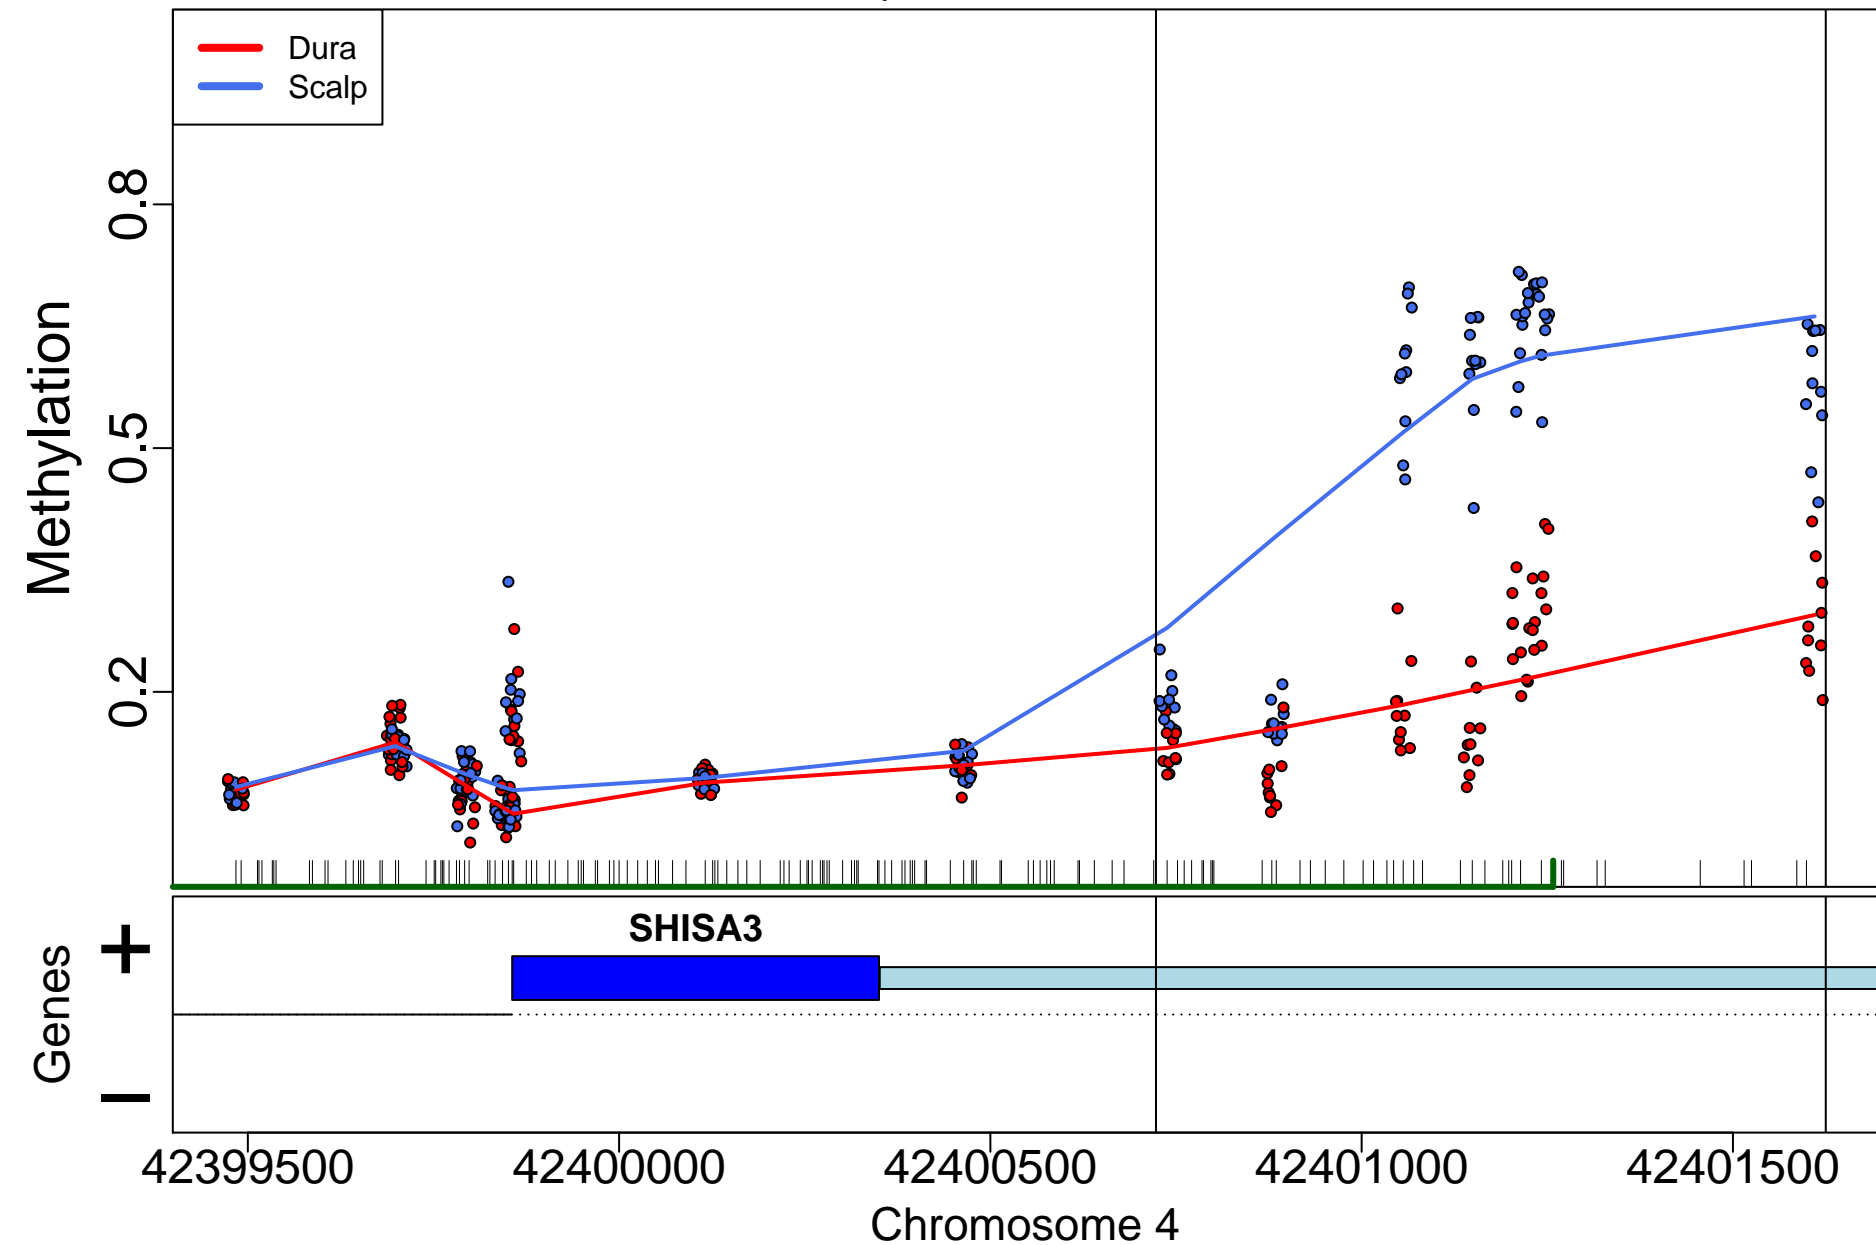

MX2; 0bp from tss:overlaps 5'

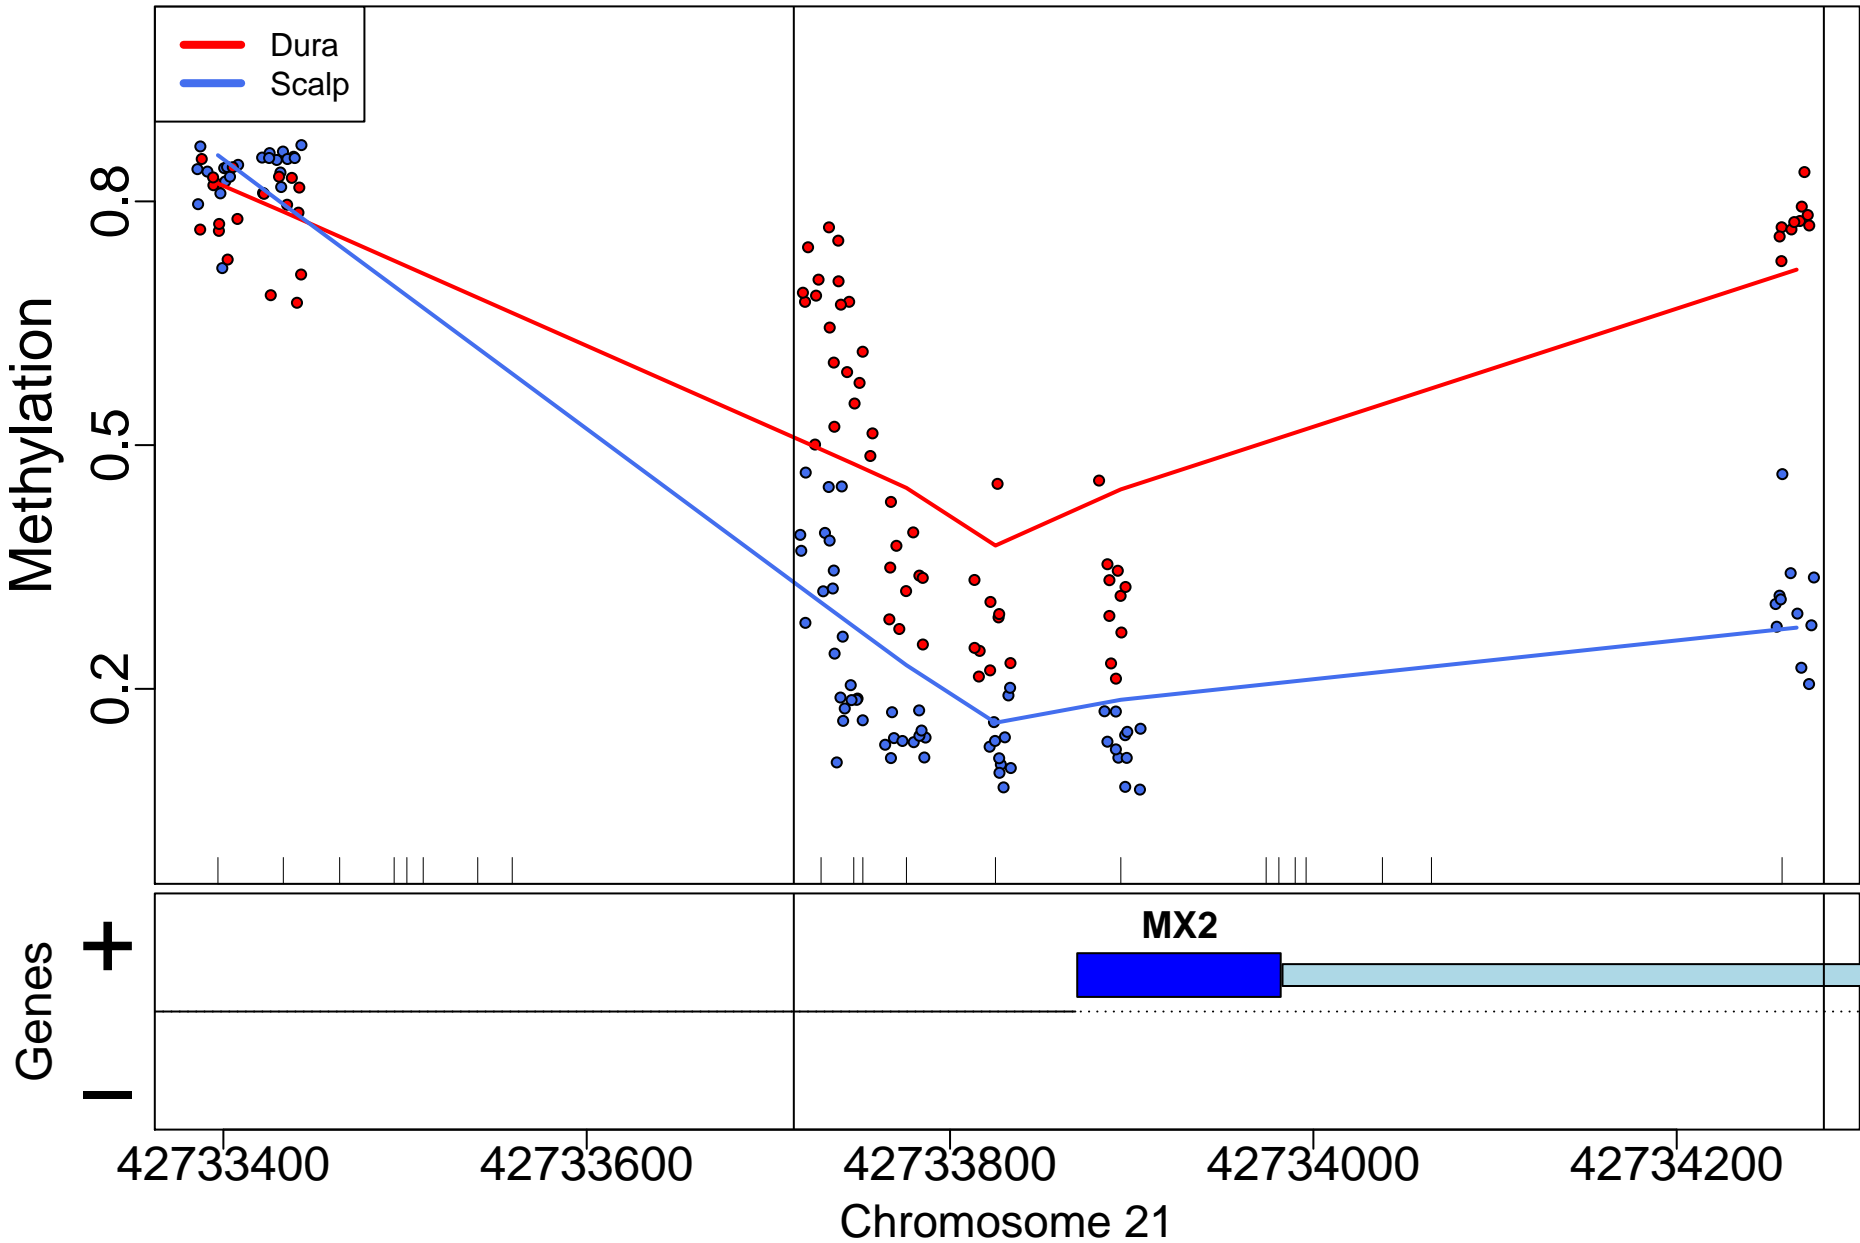

NR2E1; 1120bp from tss:inside intron

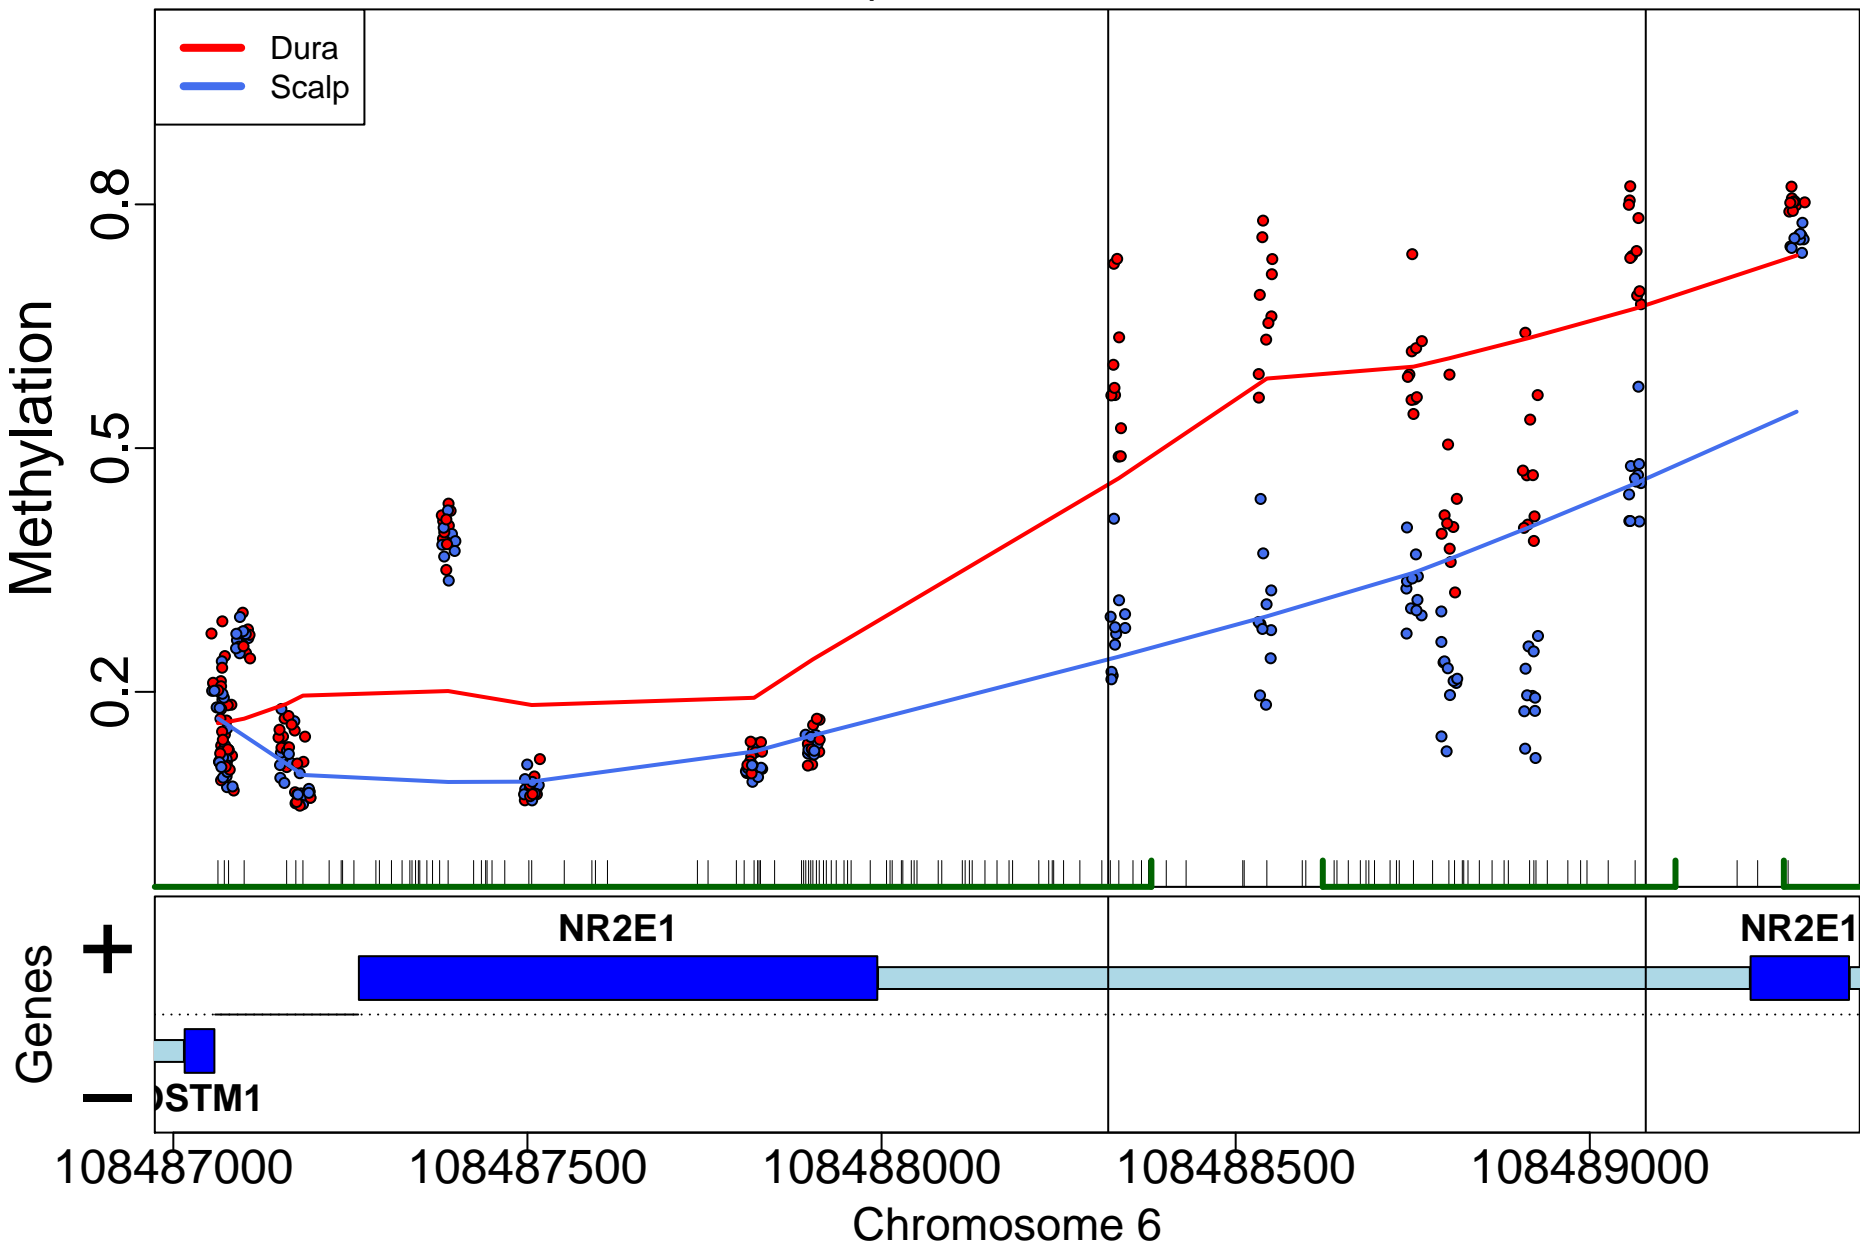

SGPP2; 399bp from tss:promoter

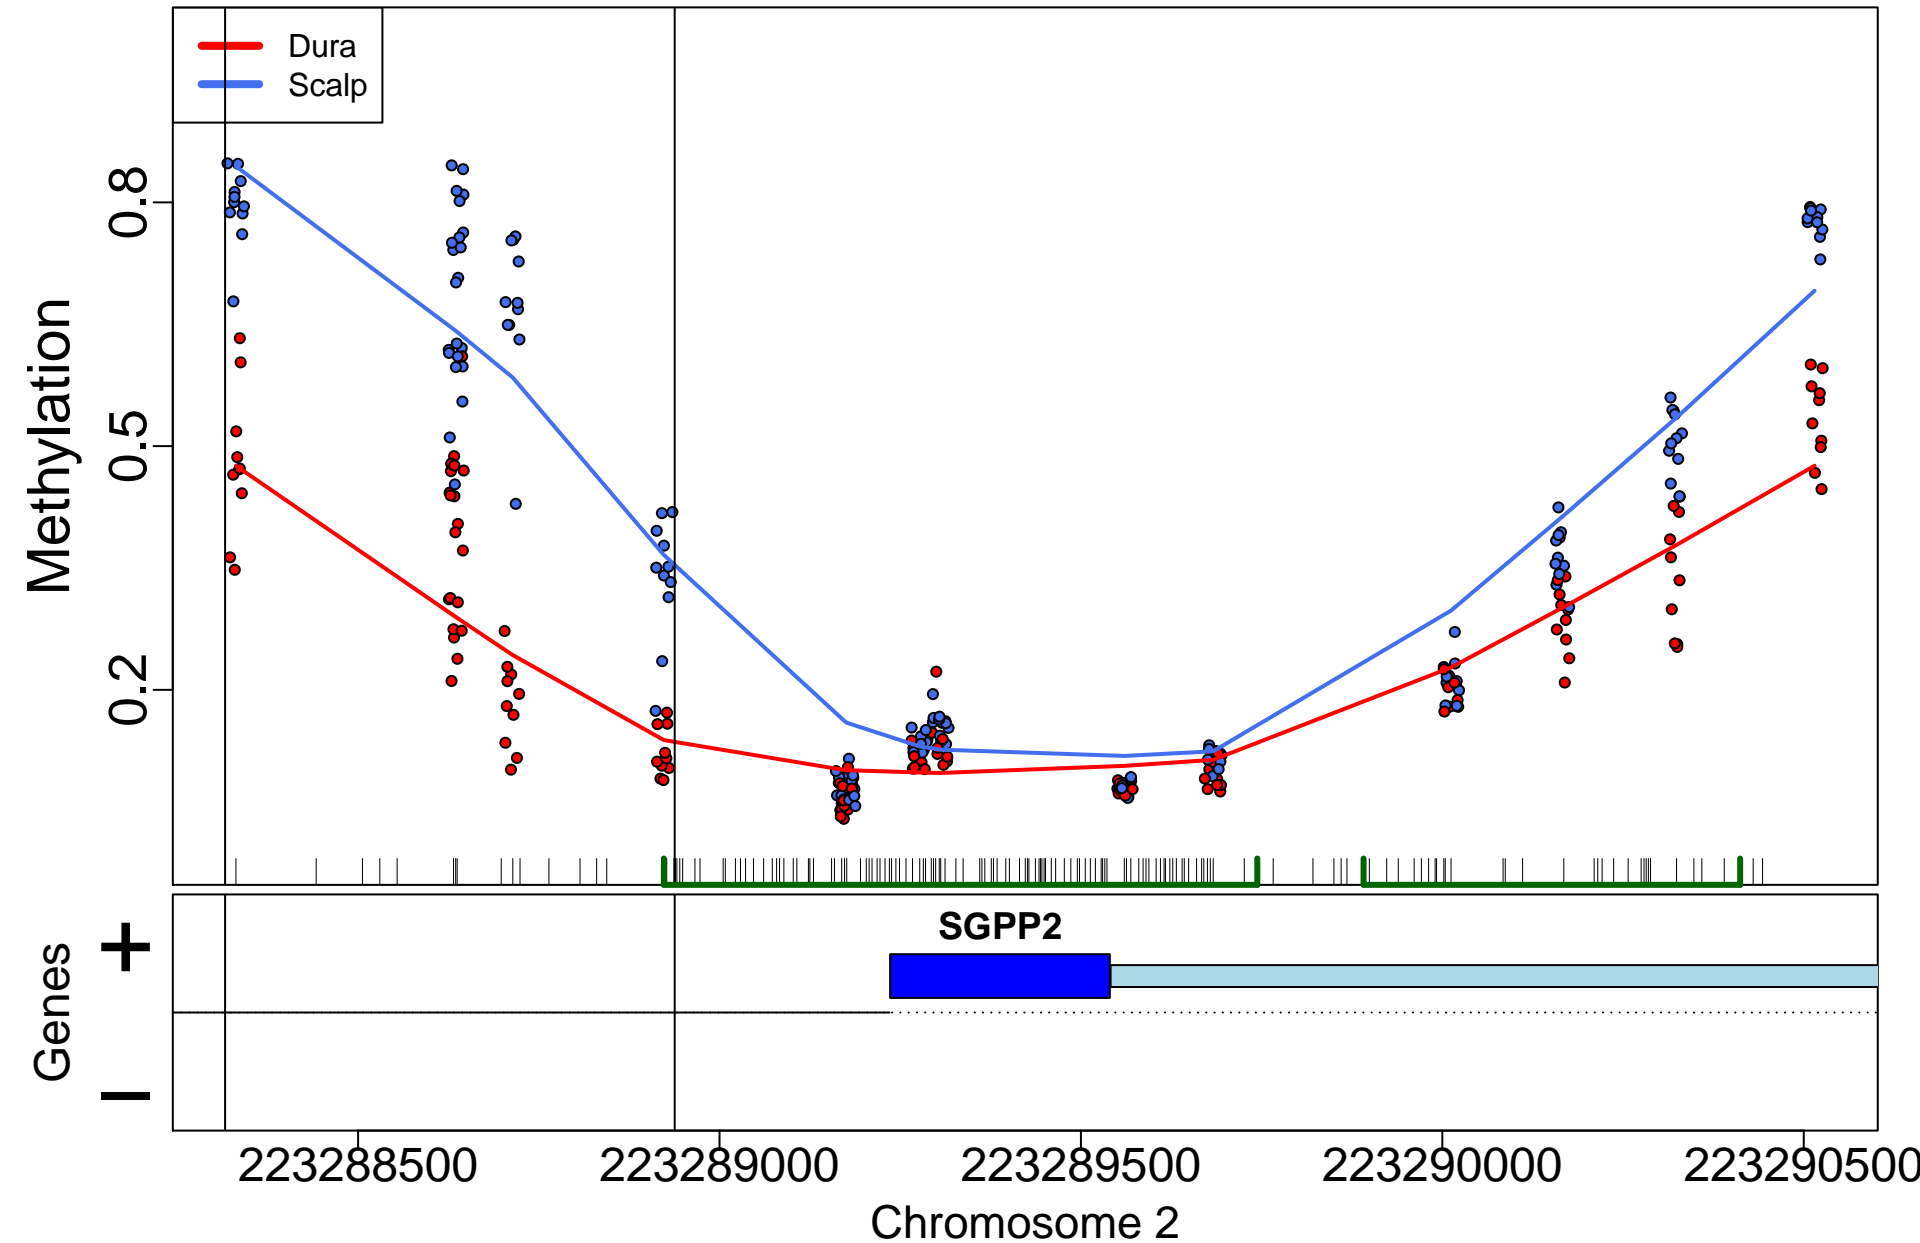

MGMT; 434292bp from tss:upstream

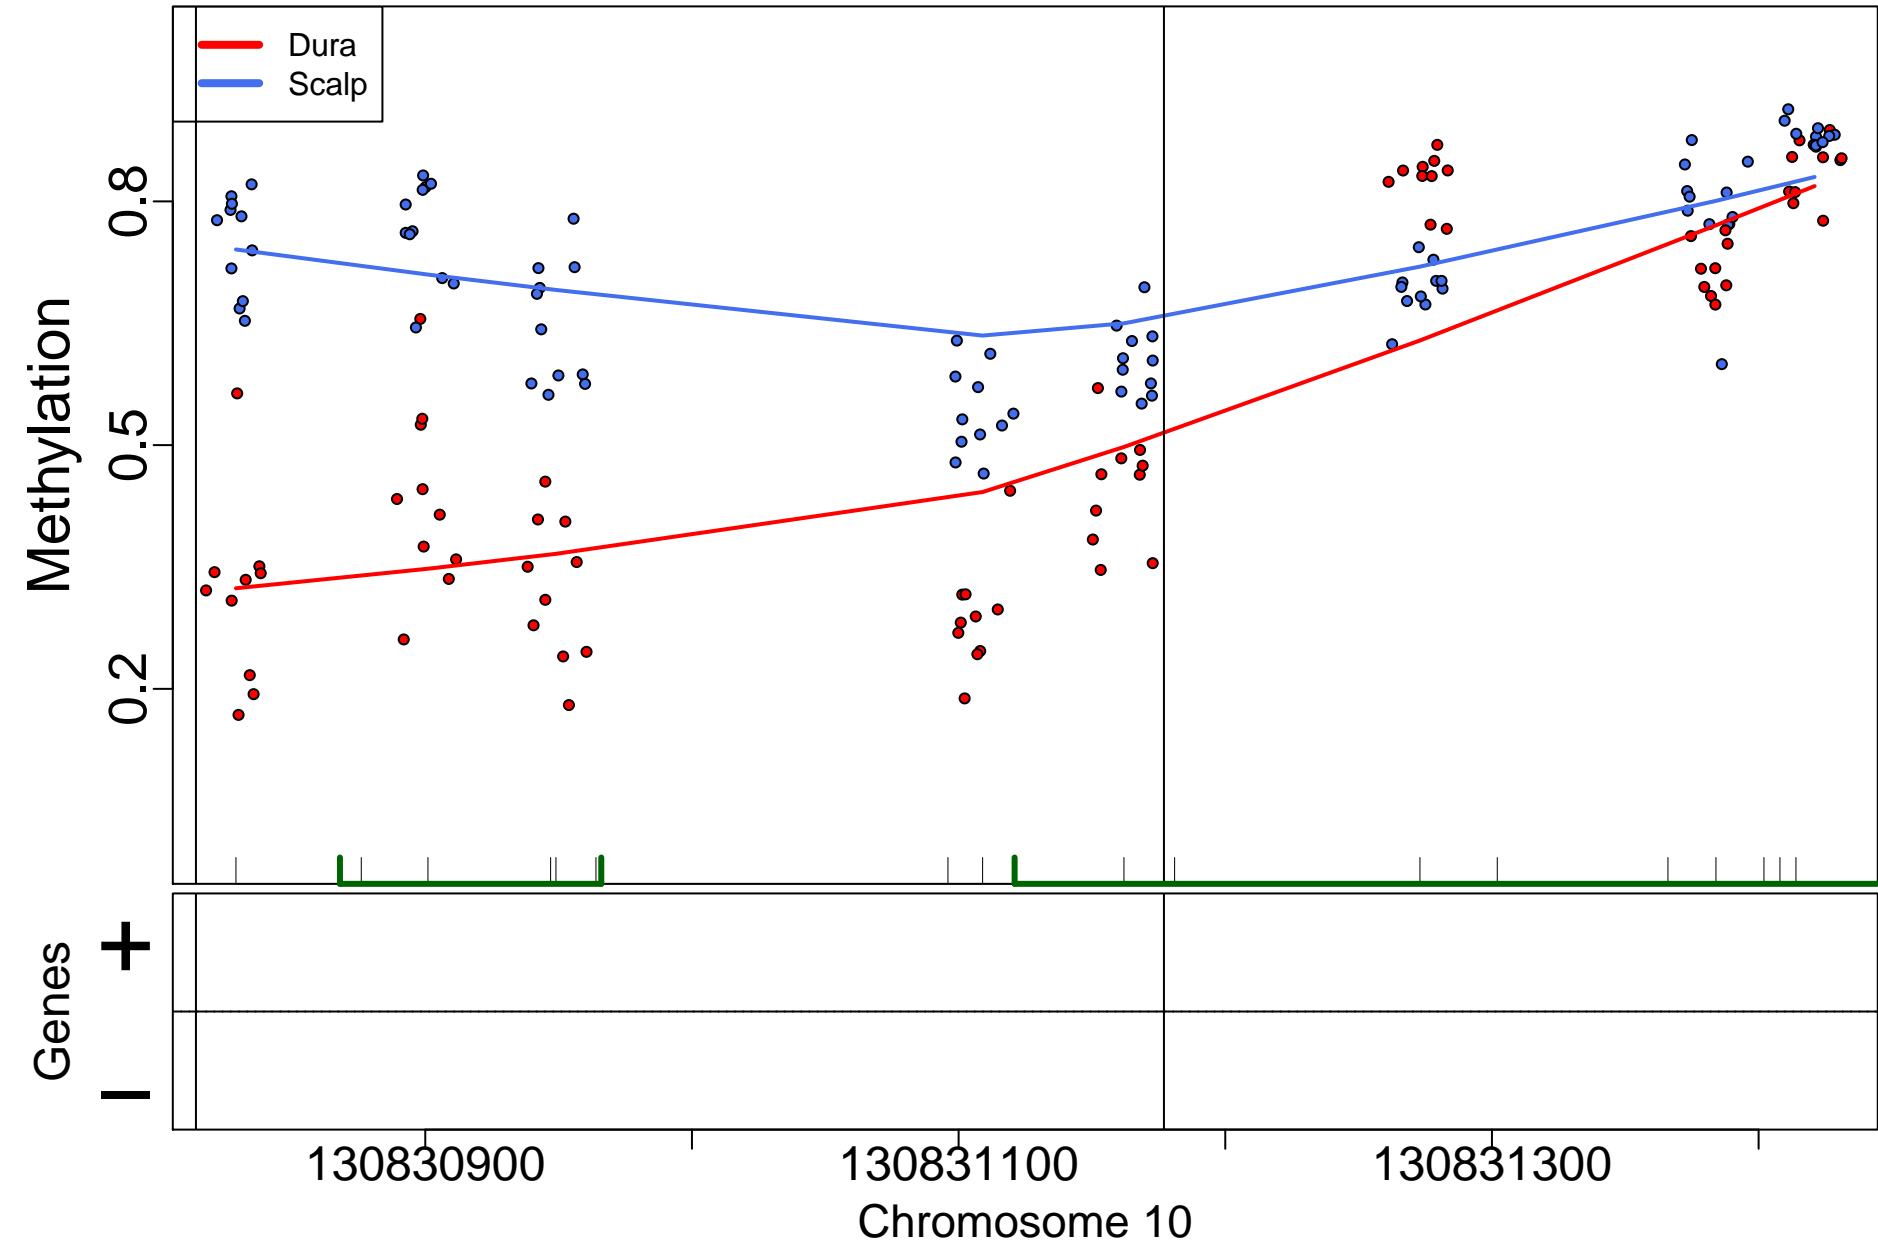



BHLHE40-AS1; 2429bp from tss:inside intron

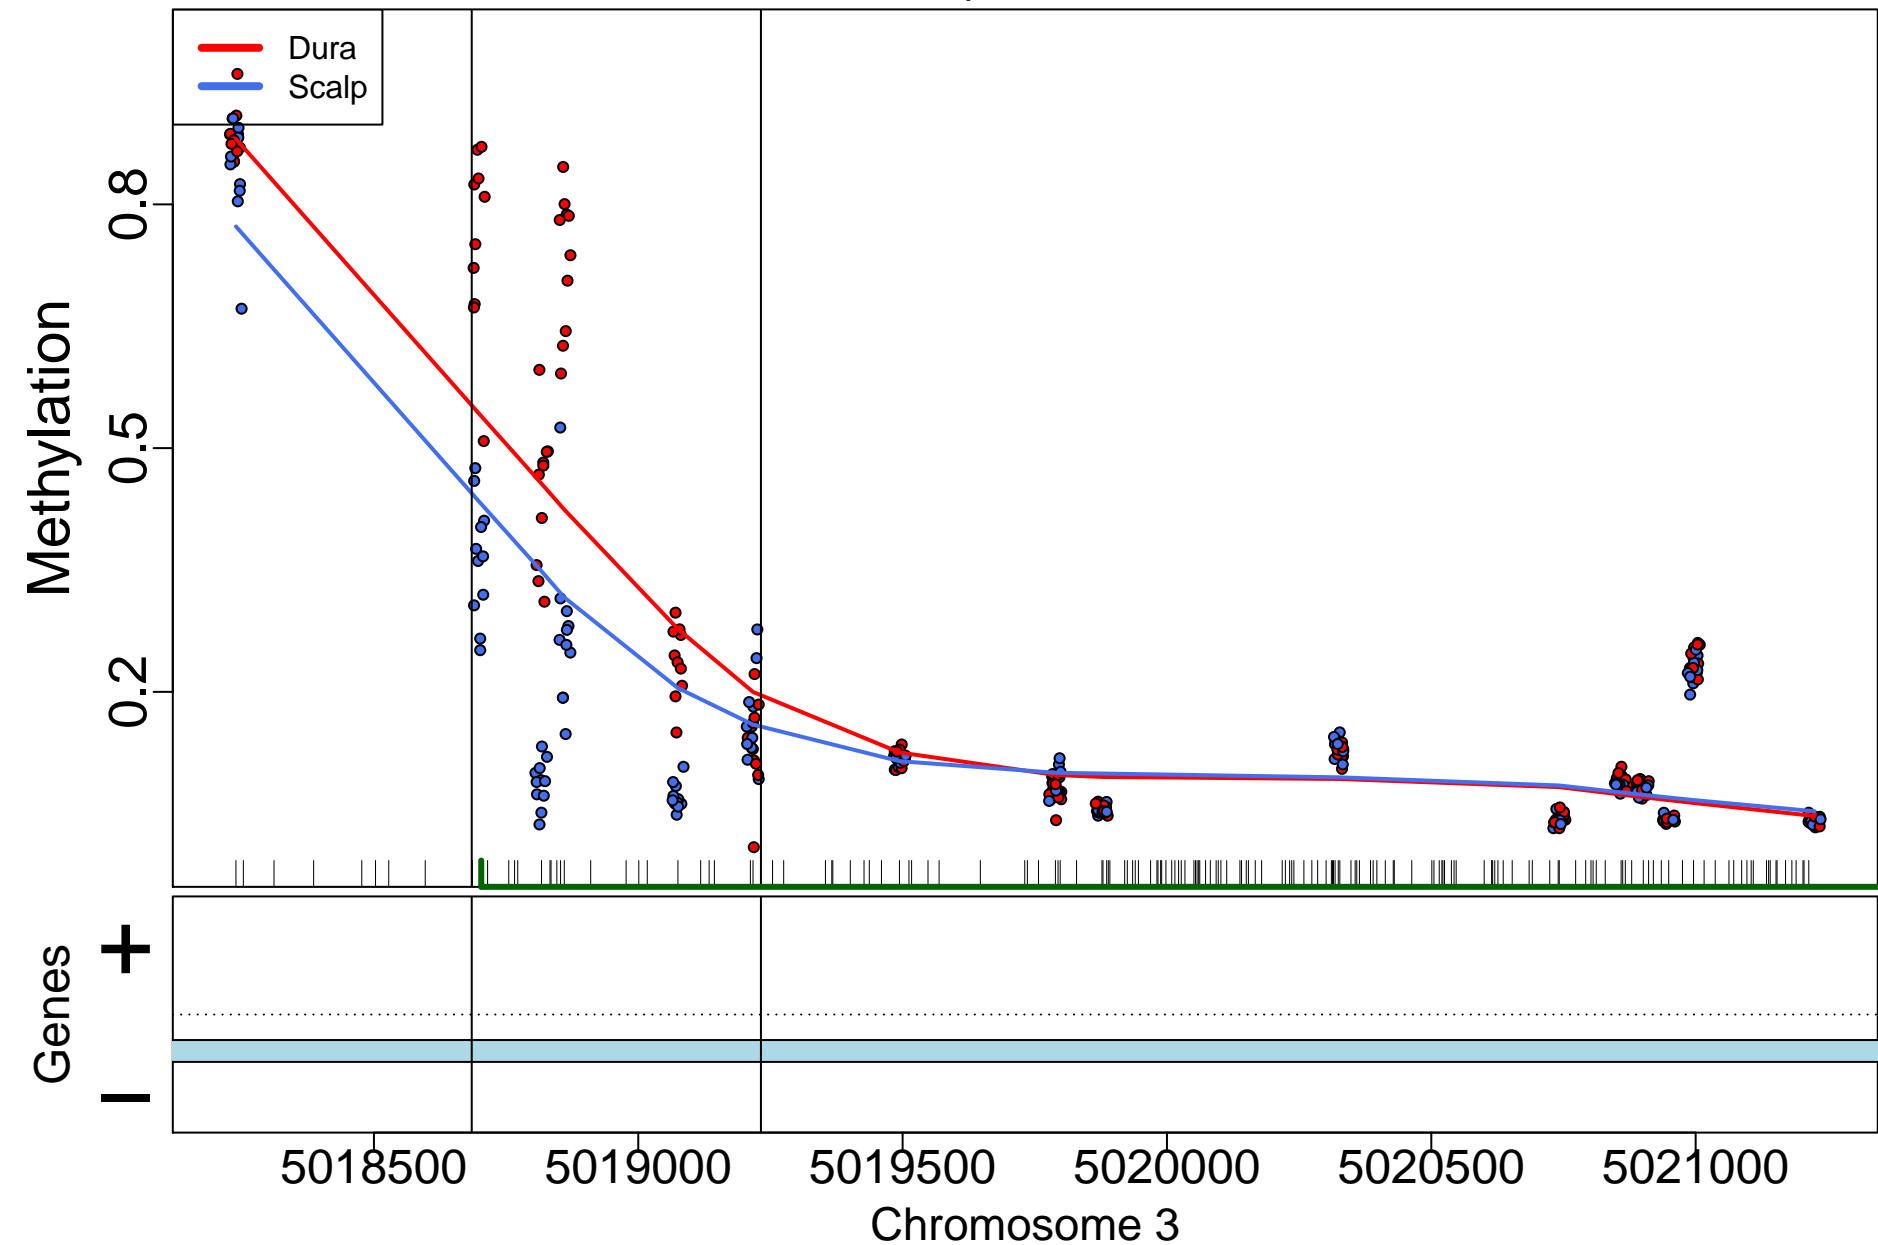

CYP1B1; 836bp from tss:overlaps exon downstream

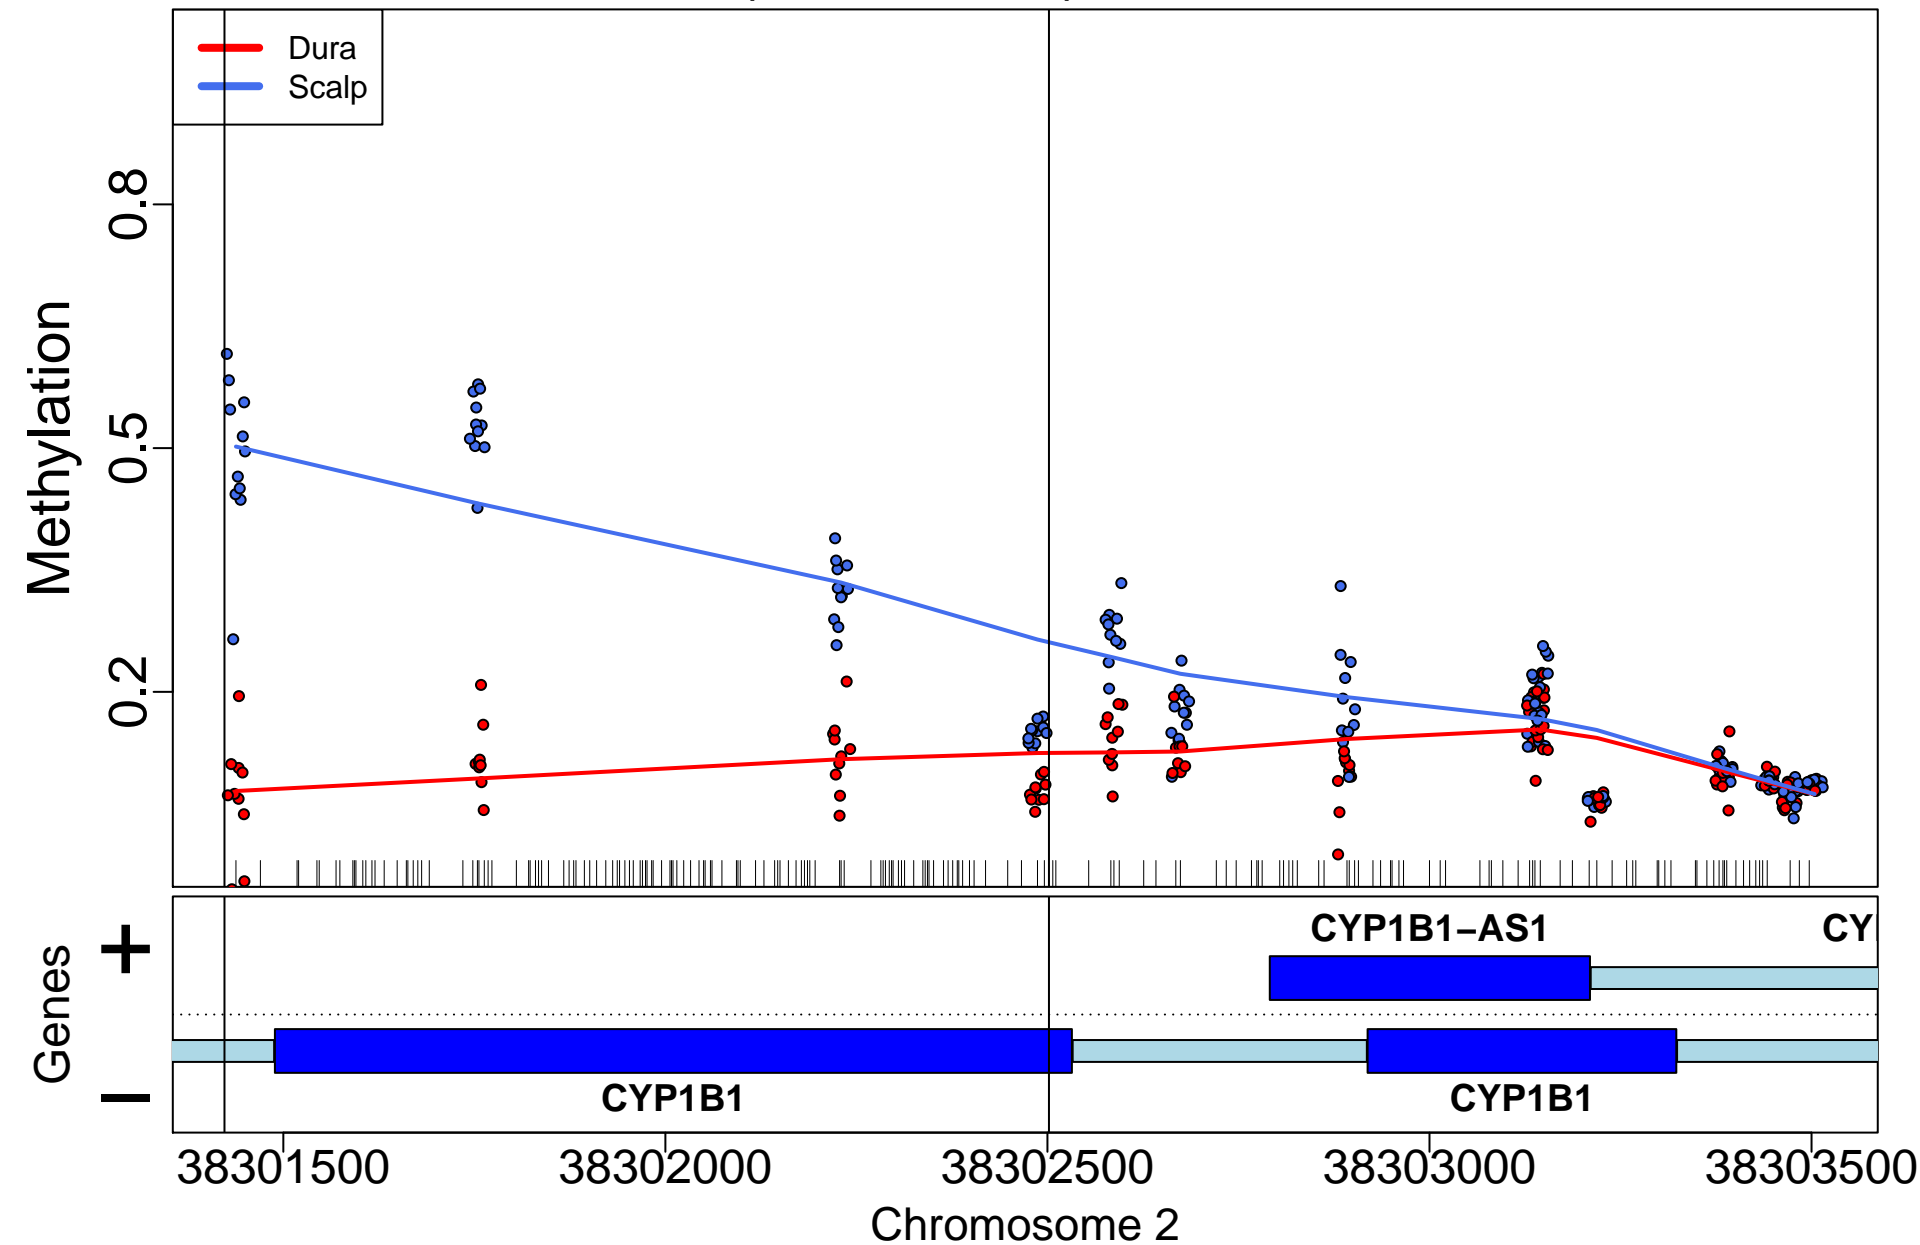

PCGF3; 16292bp from tss:inside intron

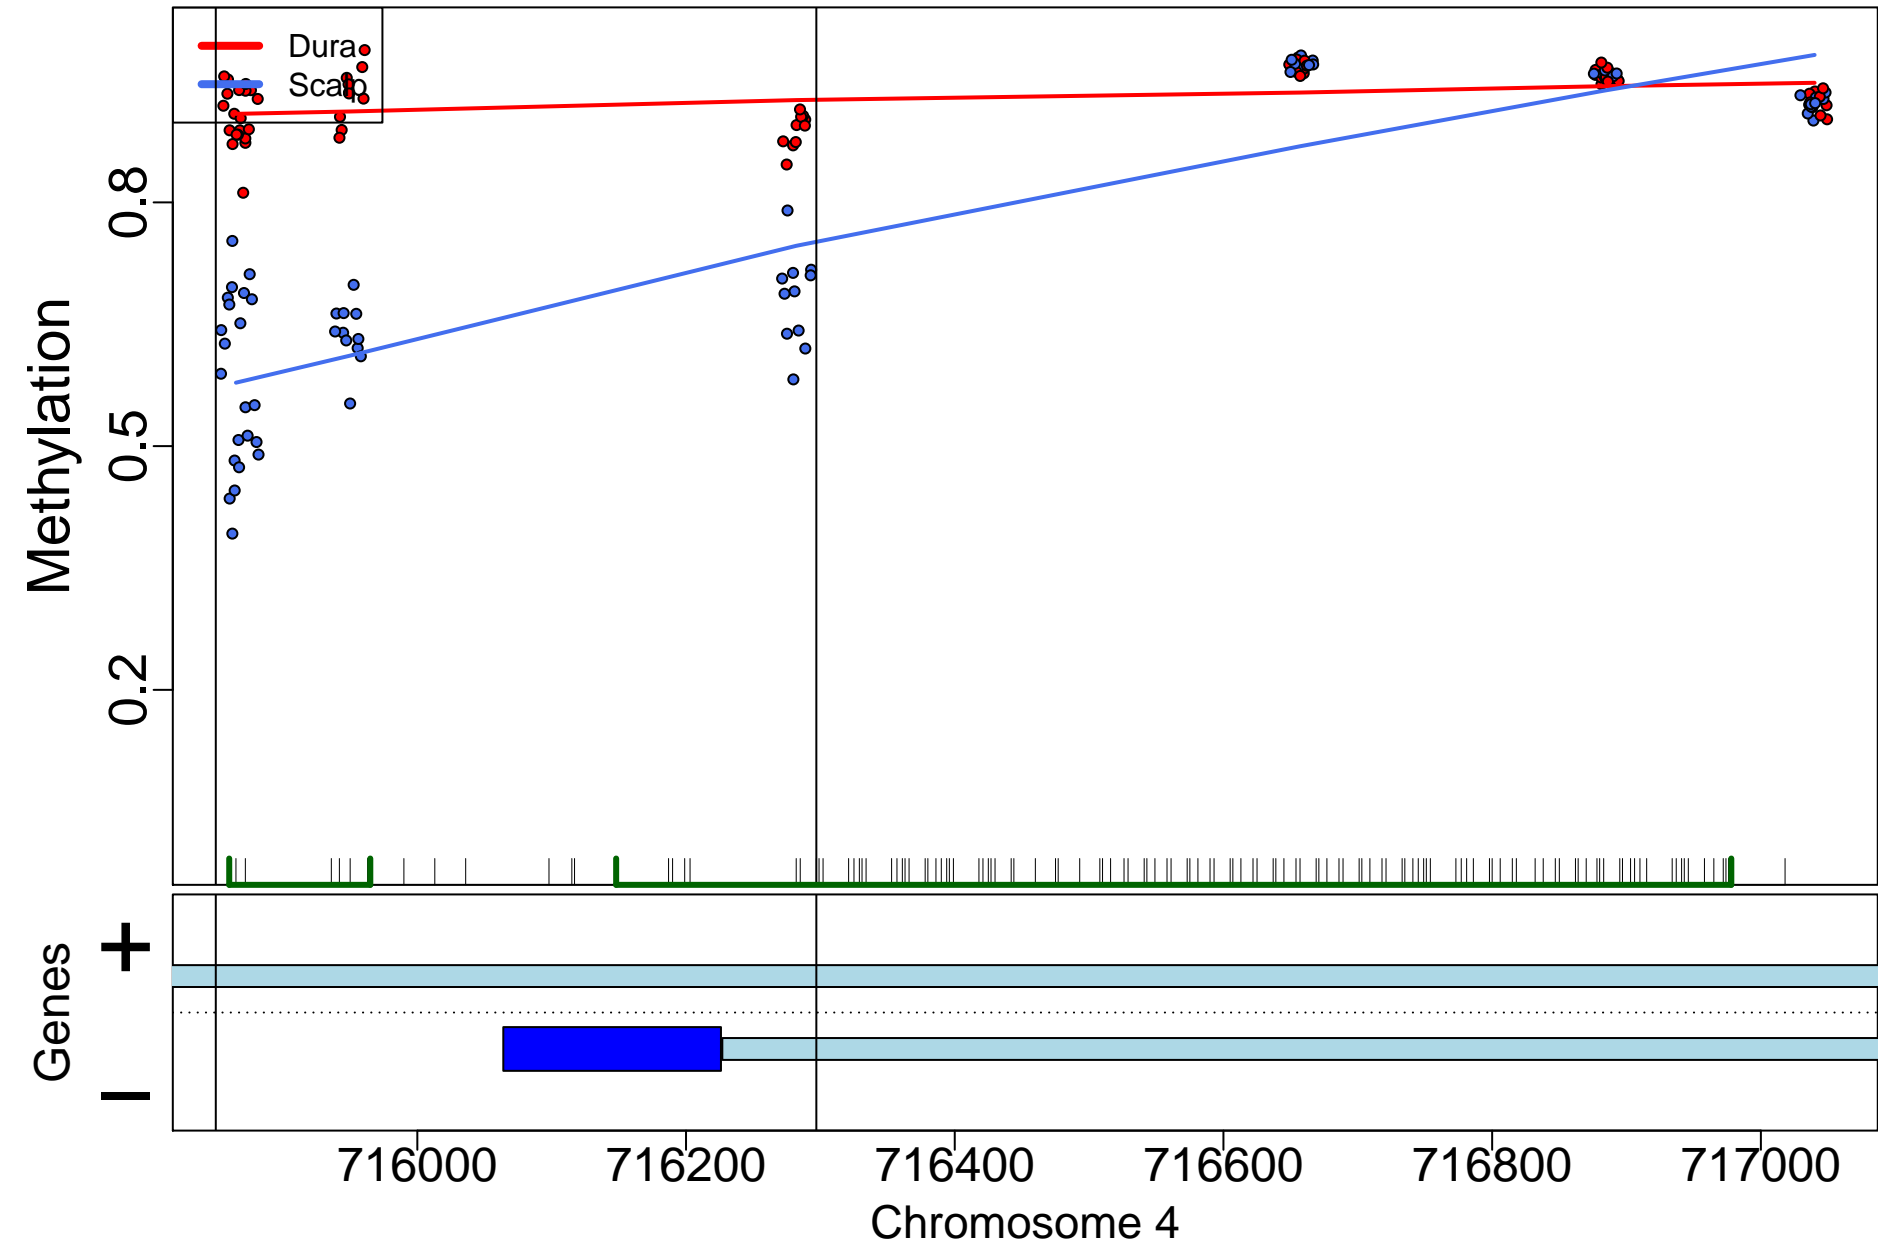

SEMA5A; 706265bp from tss:downstream

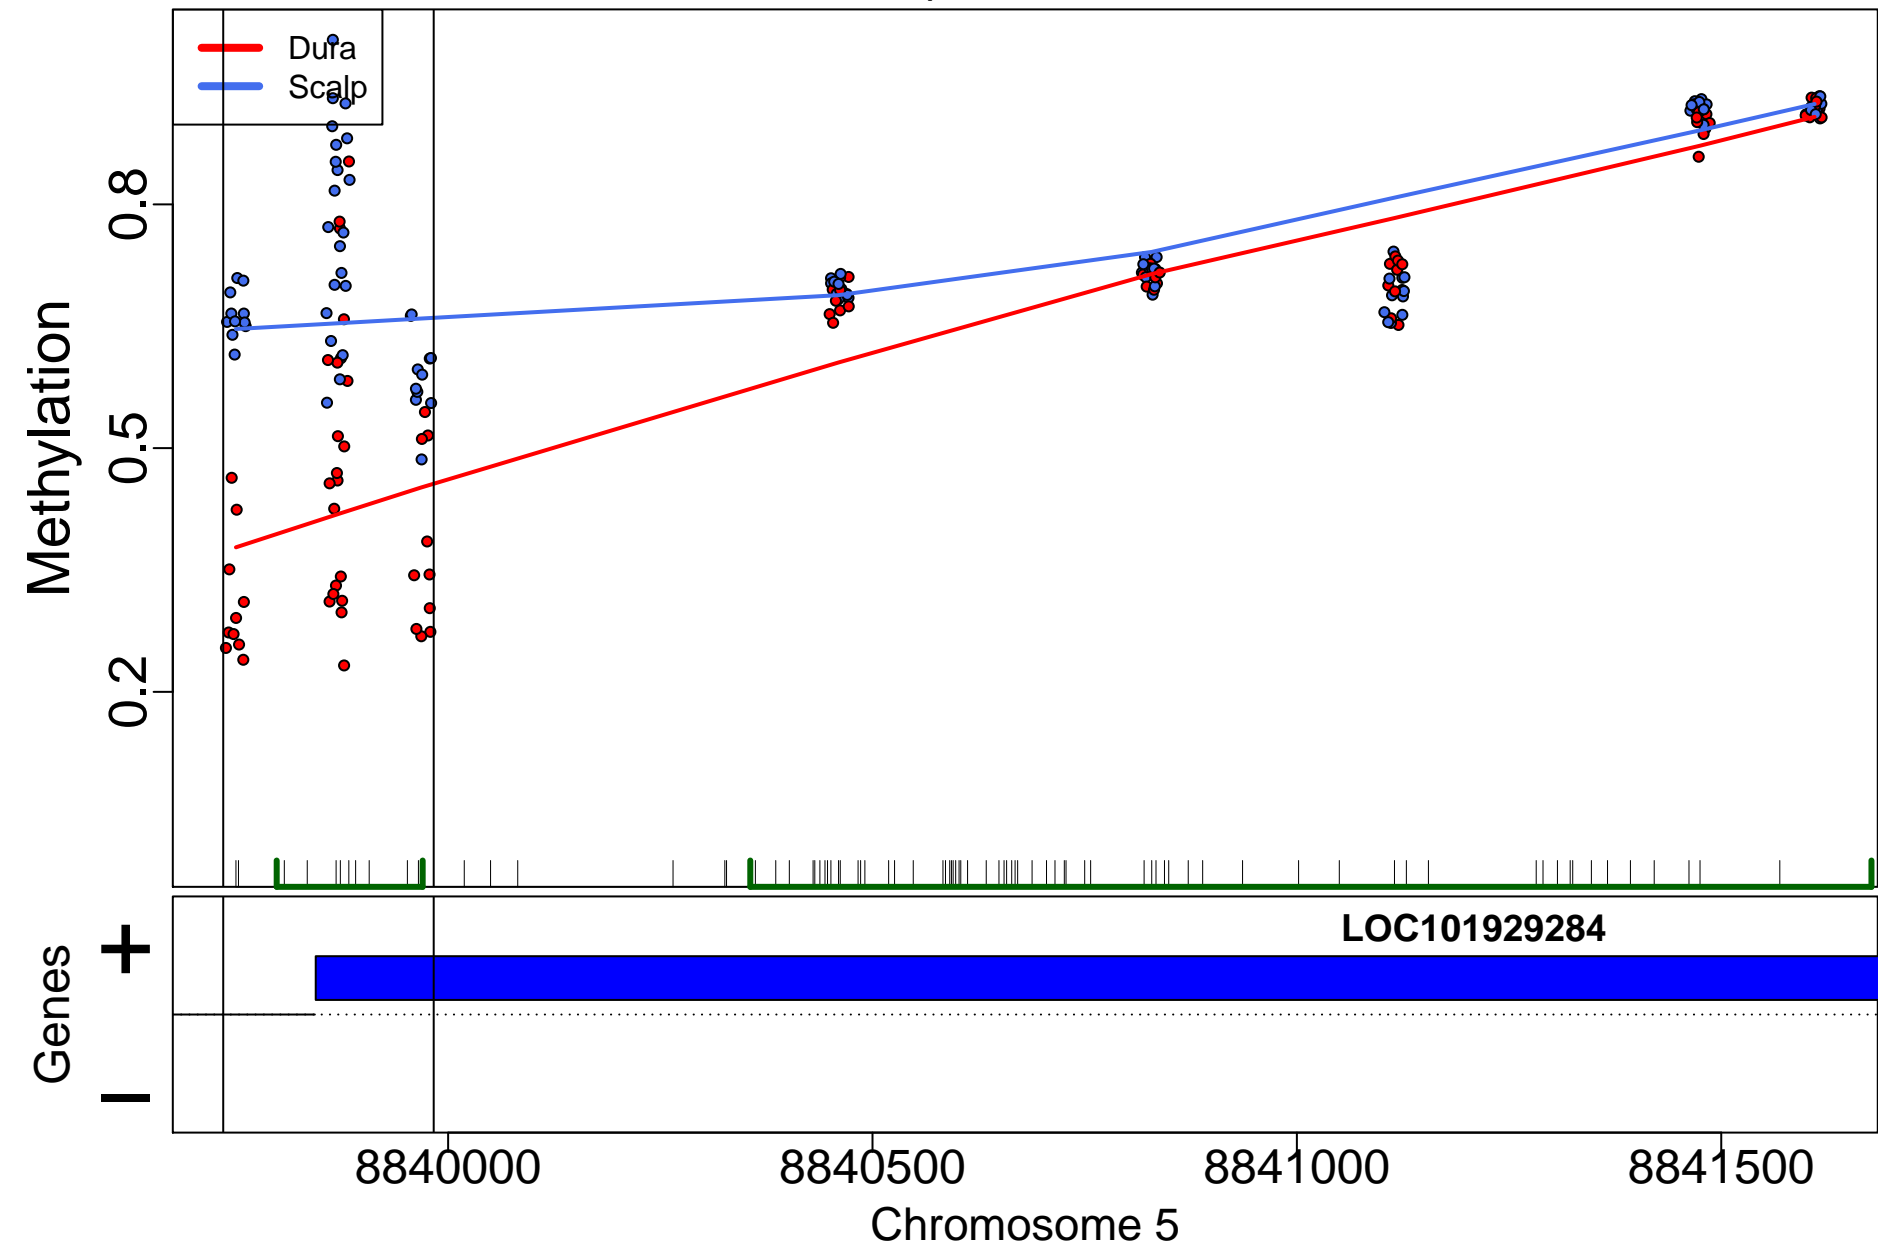

PCGF3; 20335bp from tss:inside intron

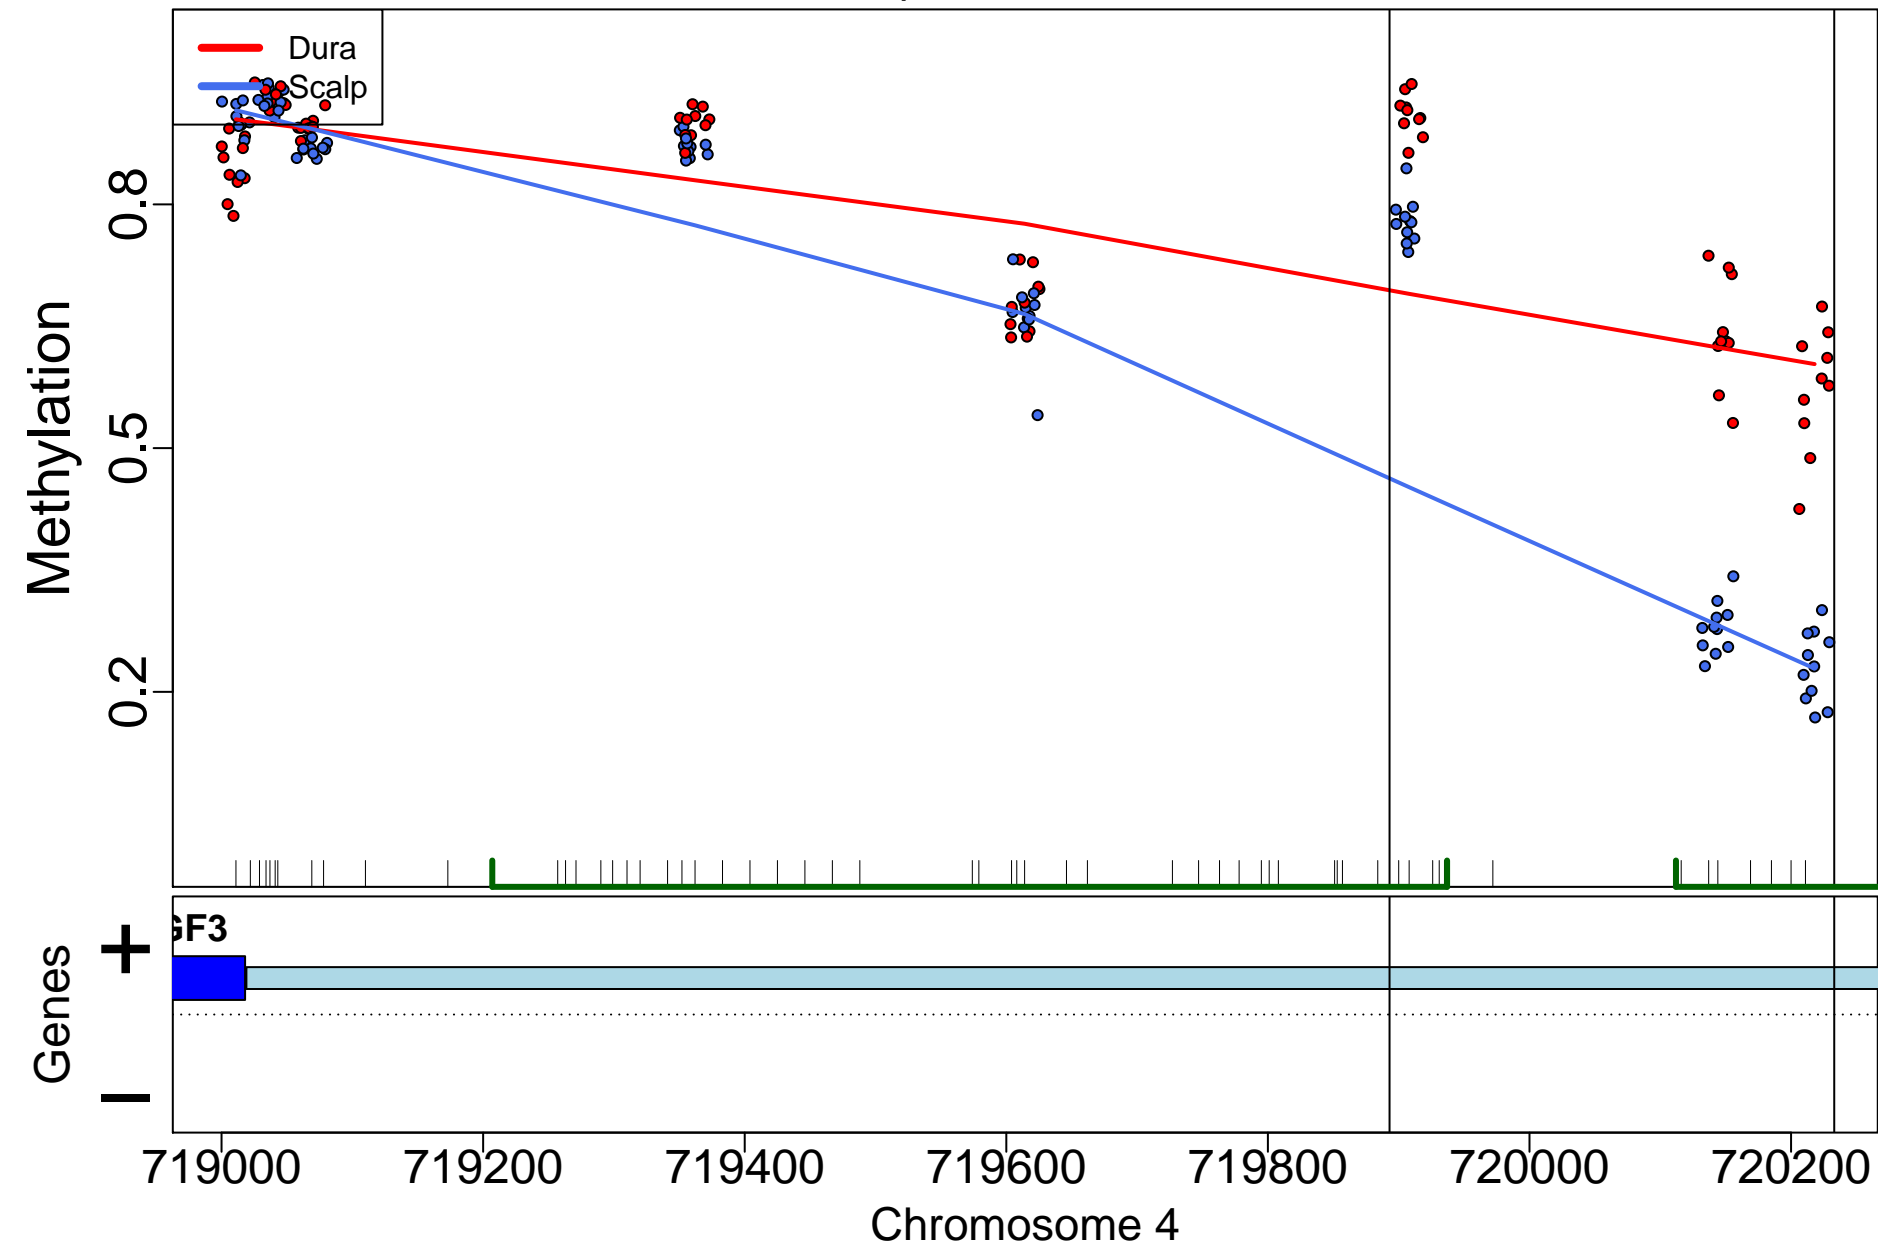

# HOXB3; 3758bp from tss:inside intron

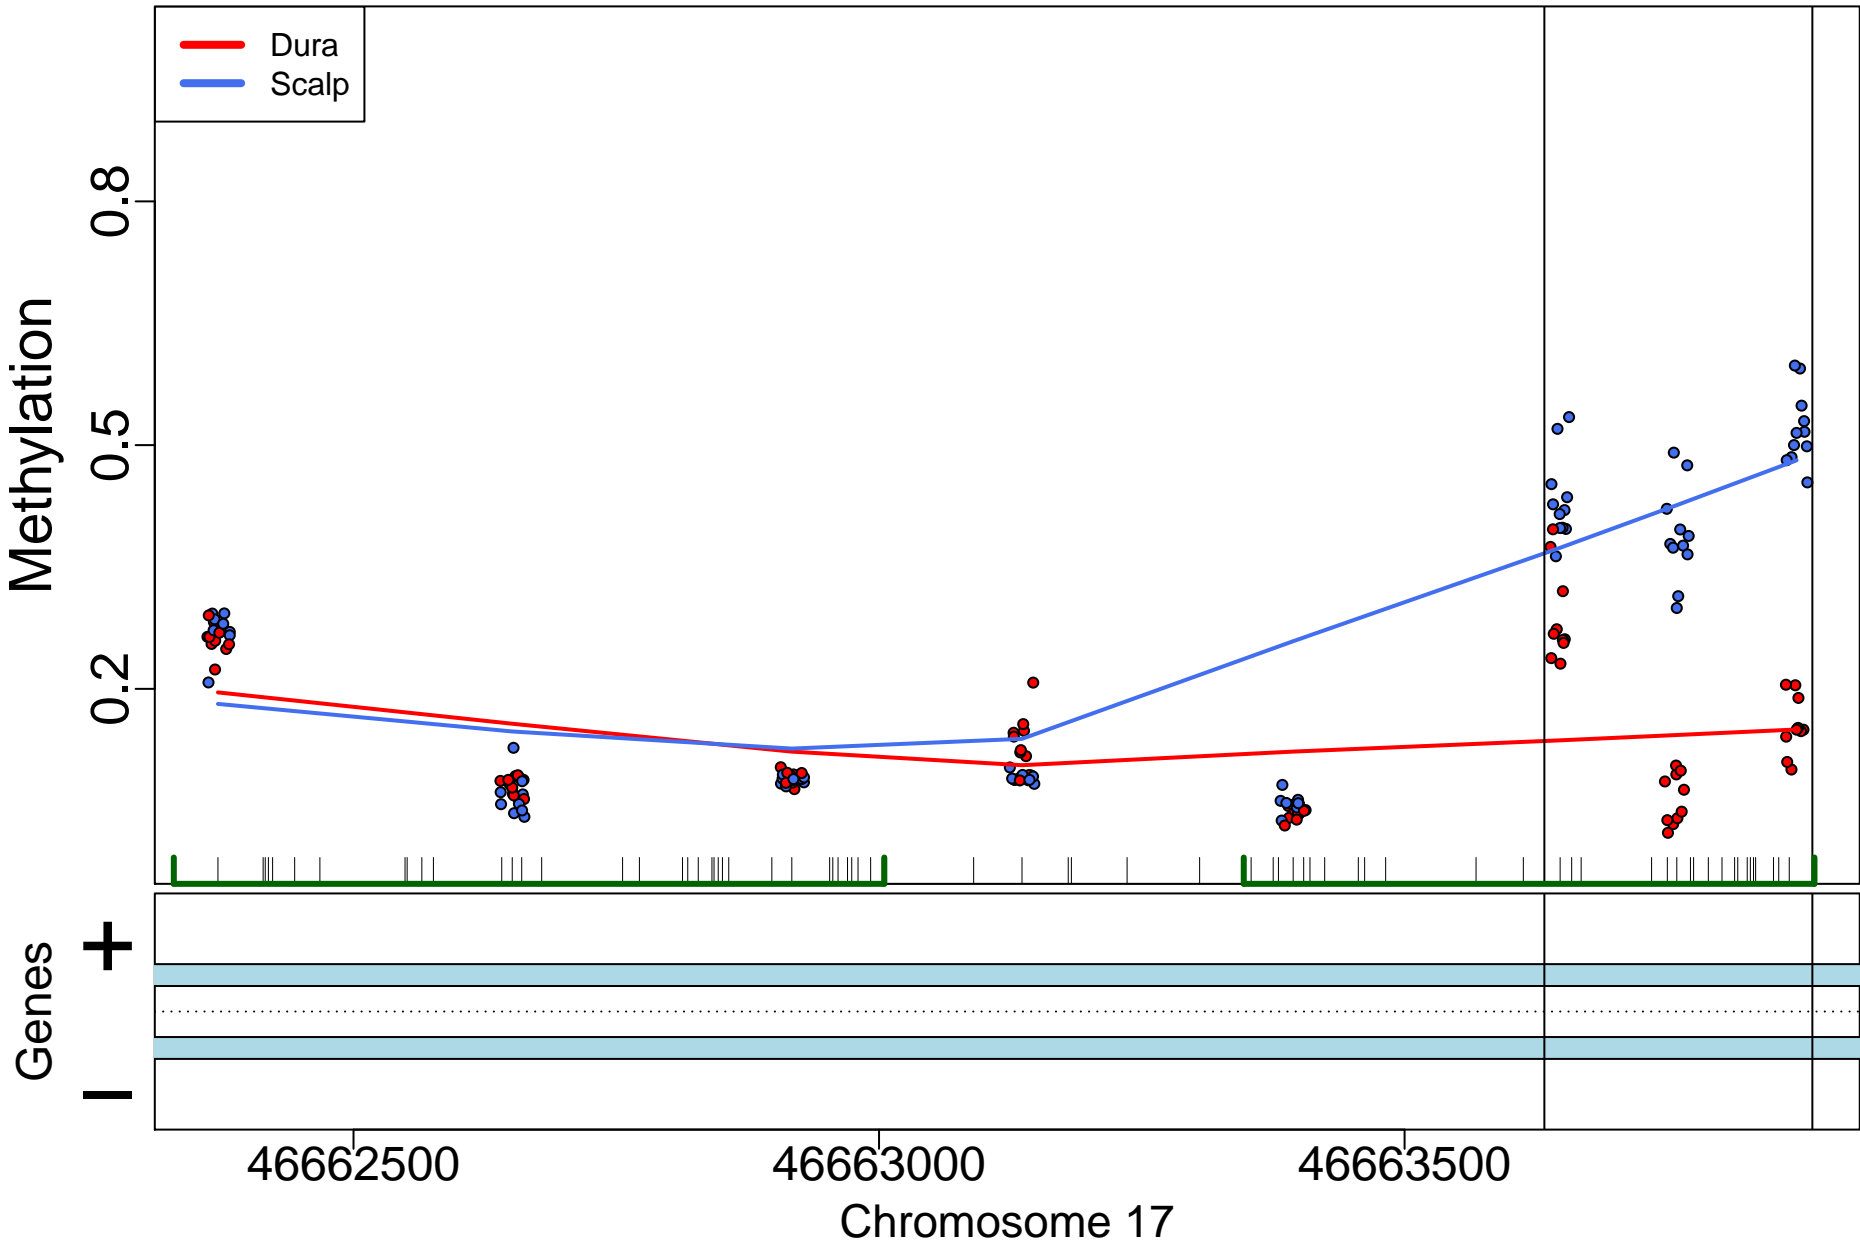

# RHBDL3; 1162bp from tss:promoter

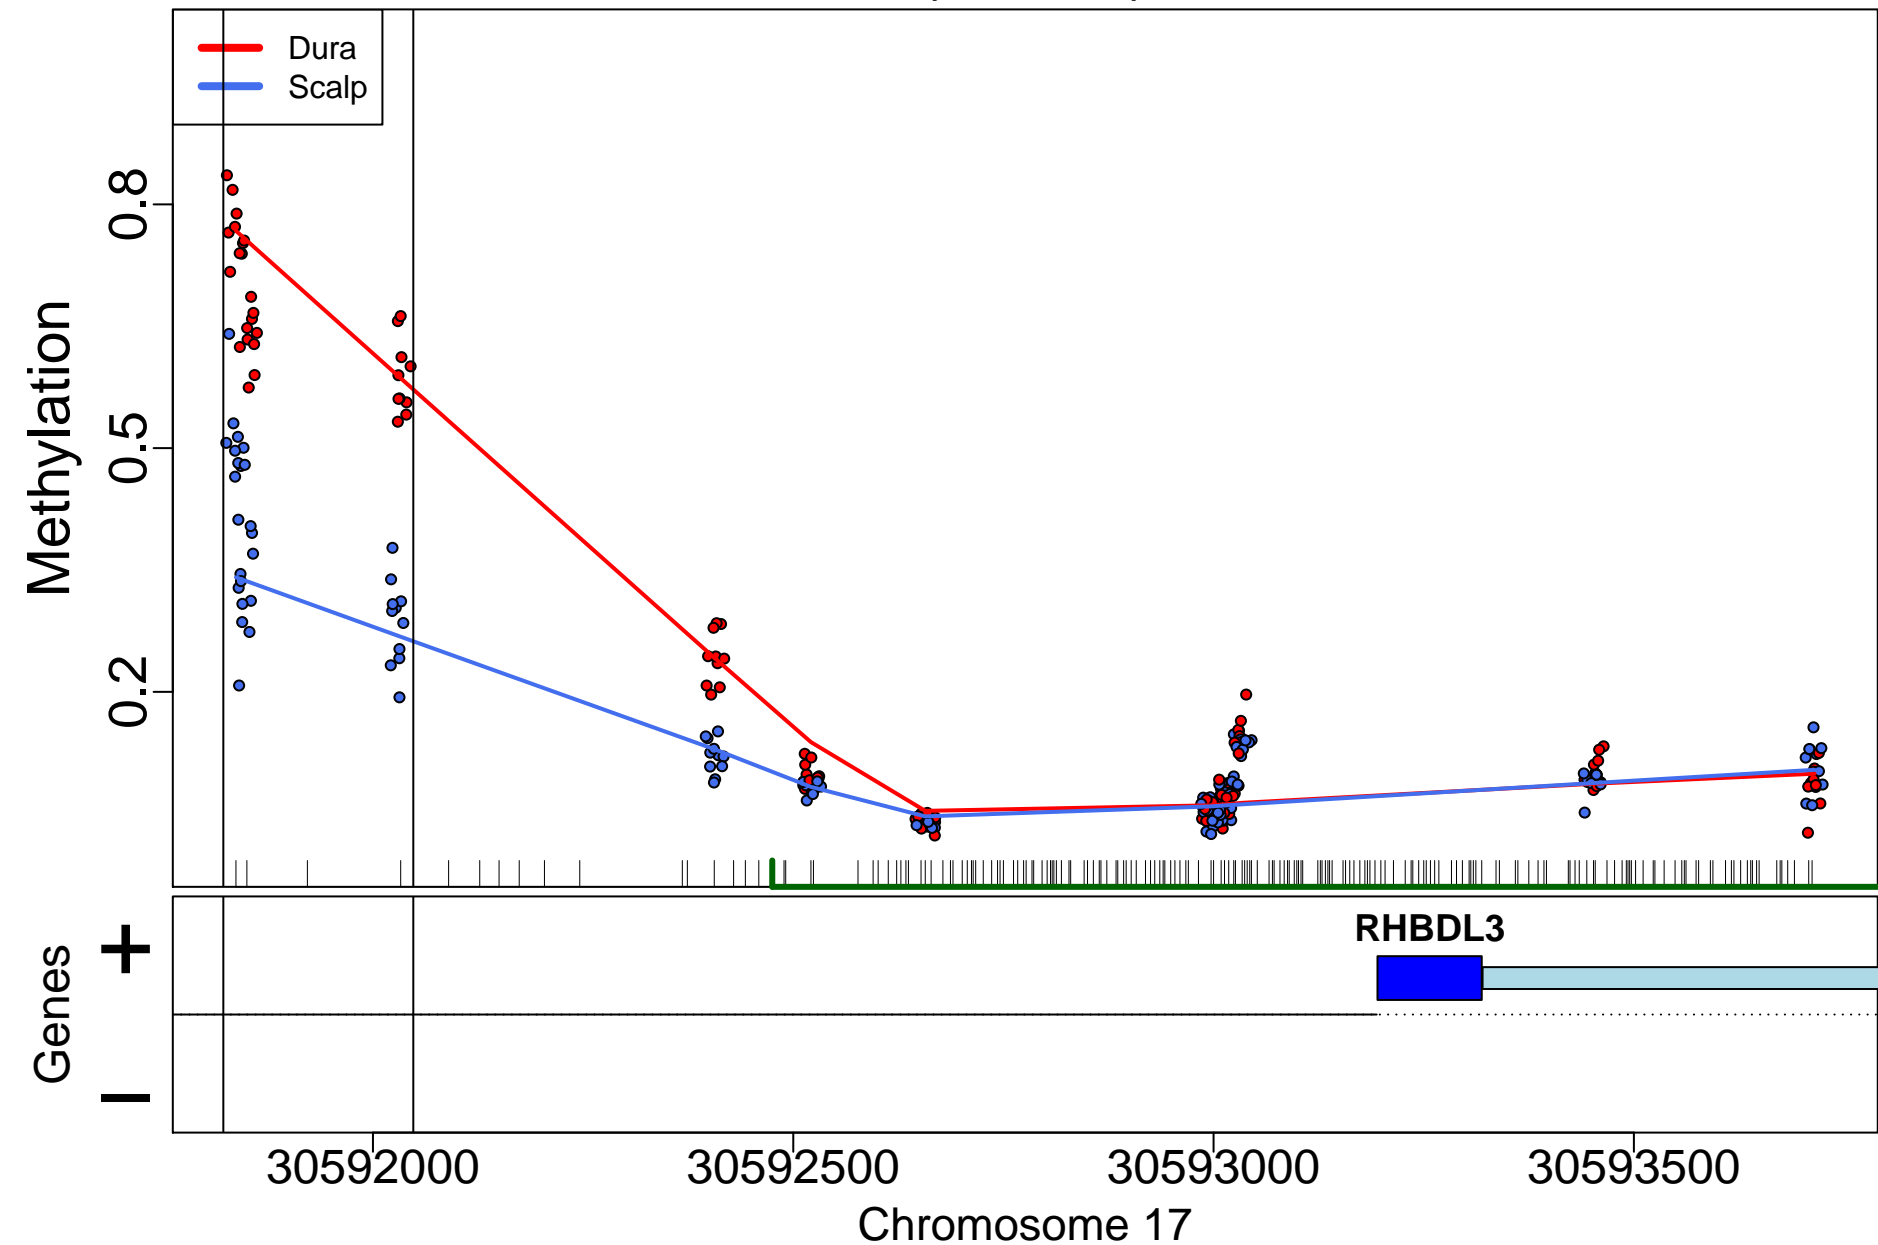

# B3GNT7; 712bp from tss:promoter

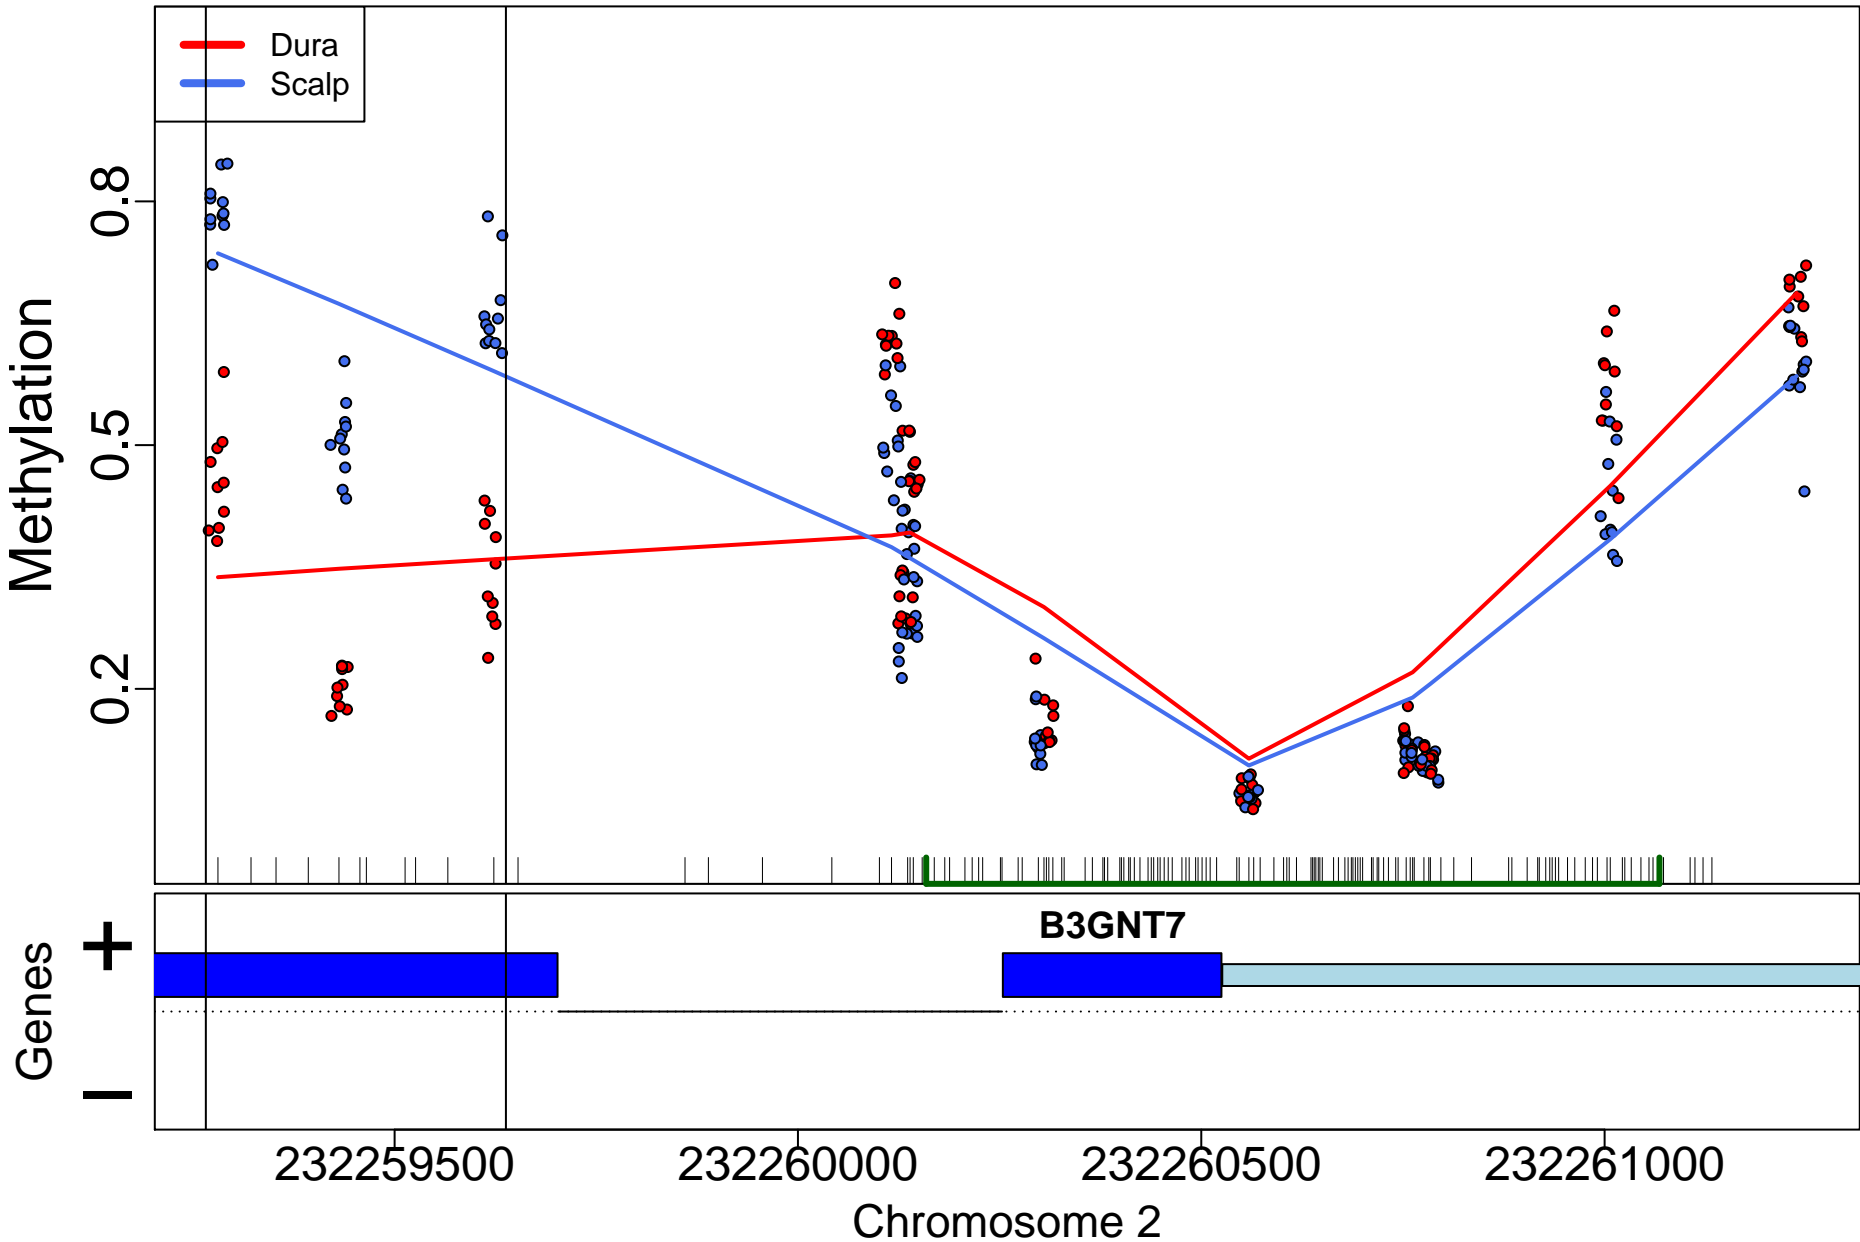



PWWP2B; 1155bp from tss:inside intron

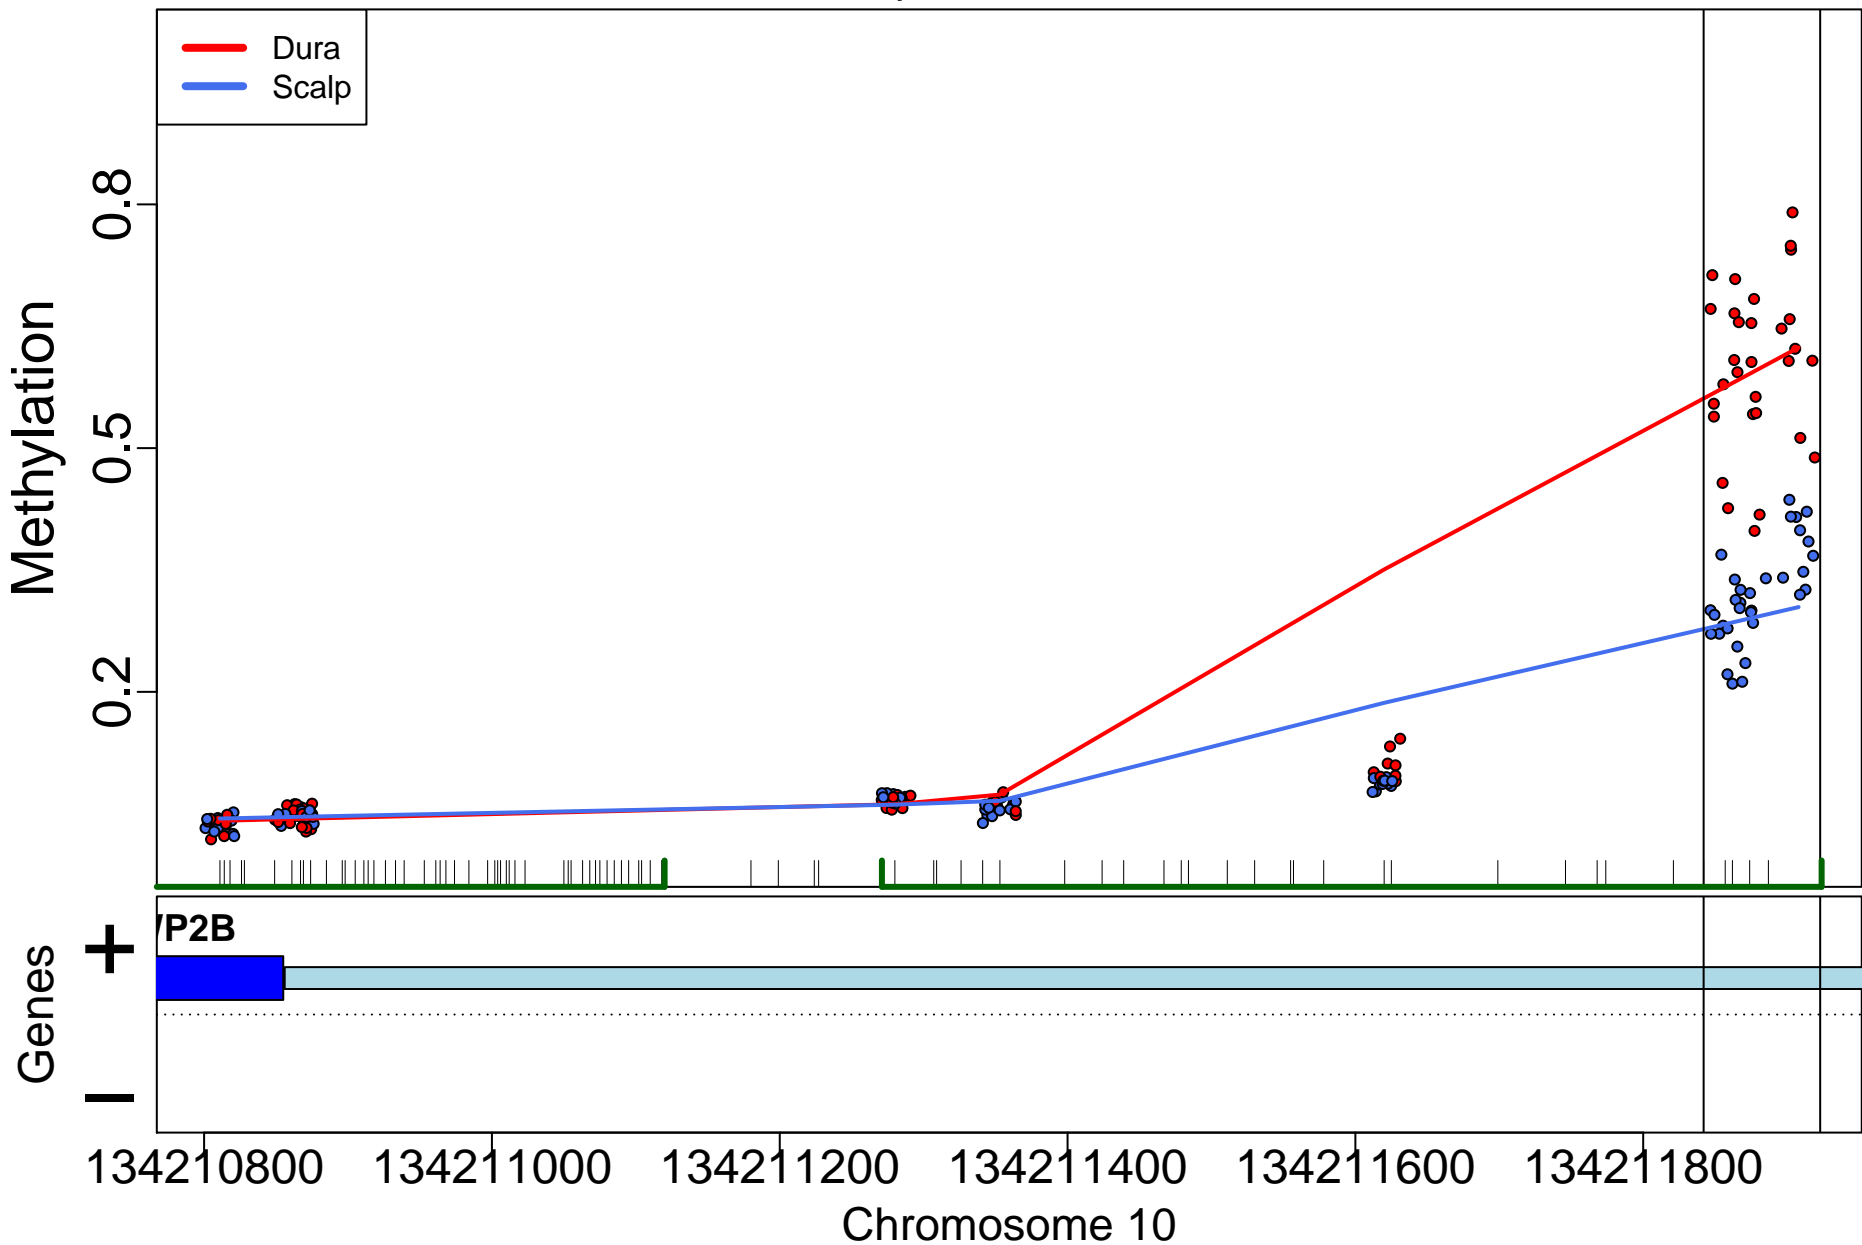

SPATA18; 864bp from tss:inside intron

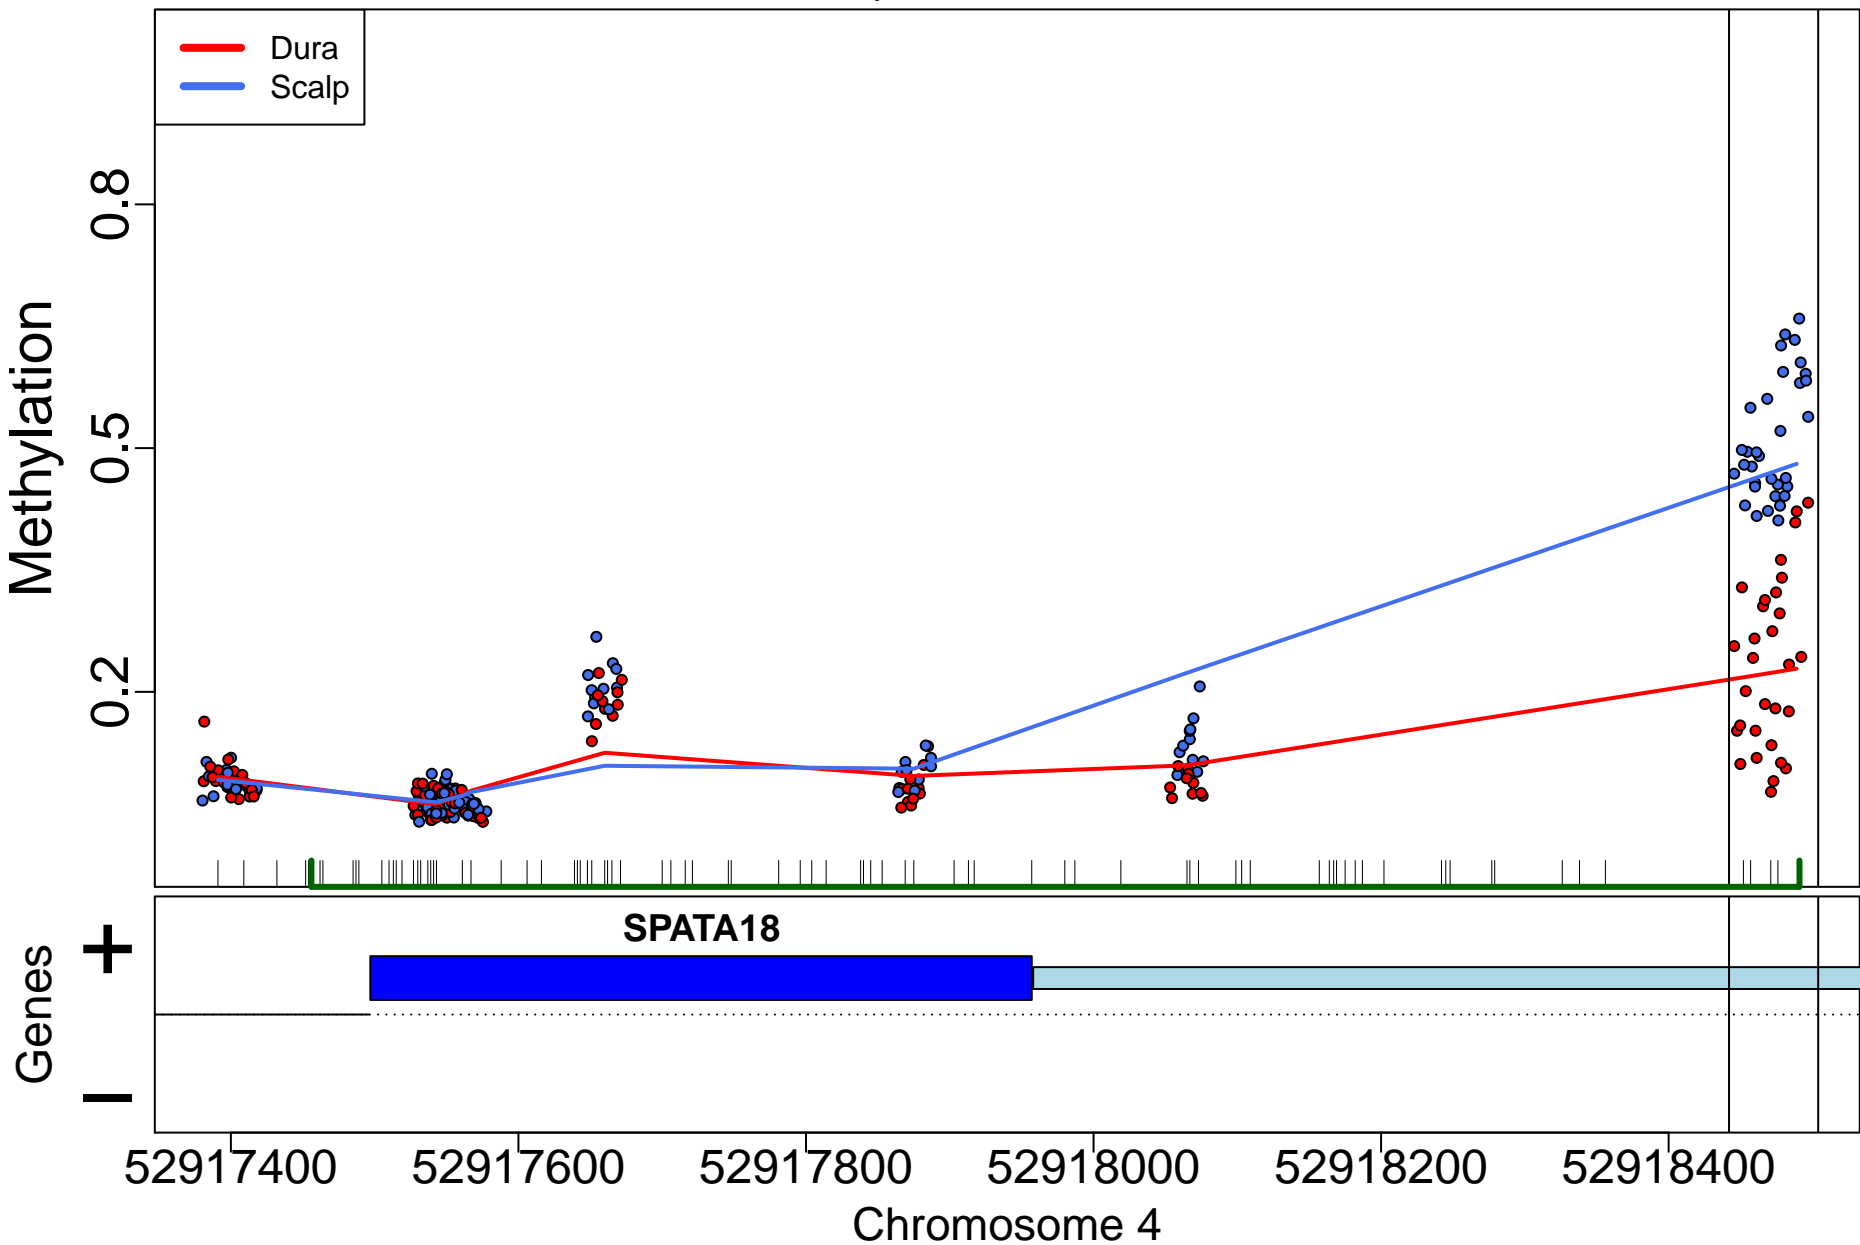

HOXB-AS1; 0bp from tss:NA

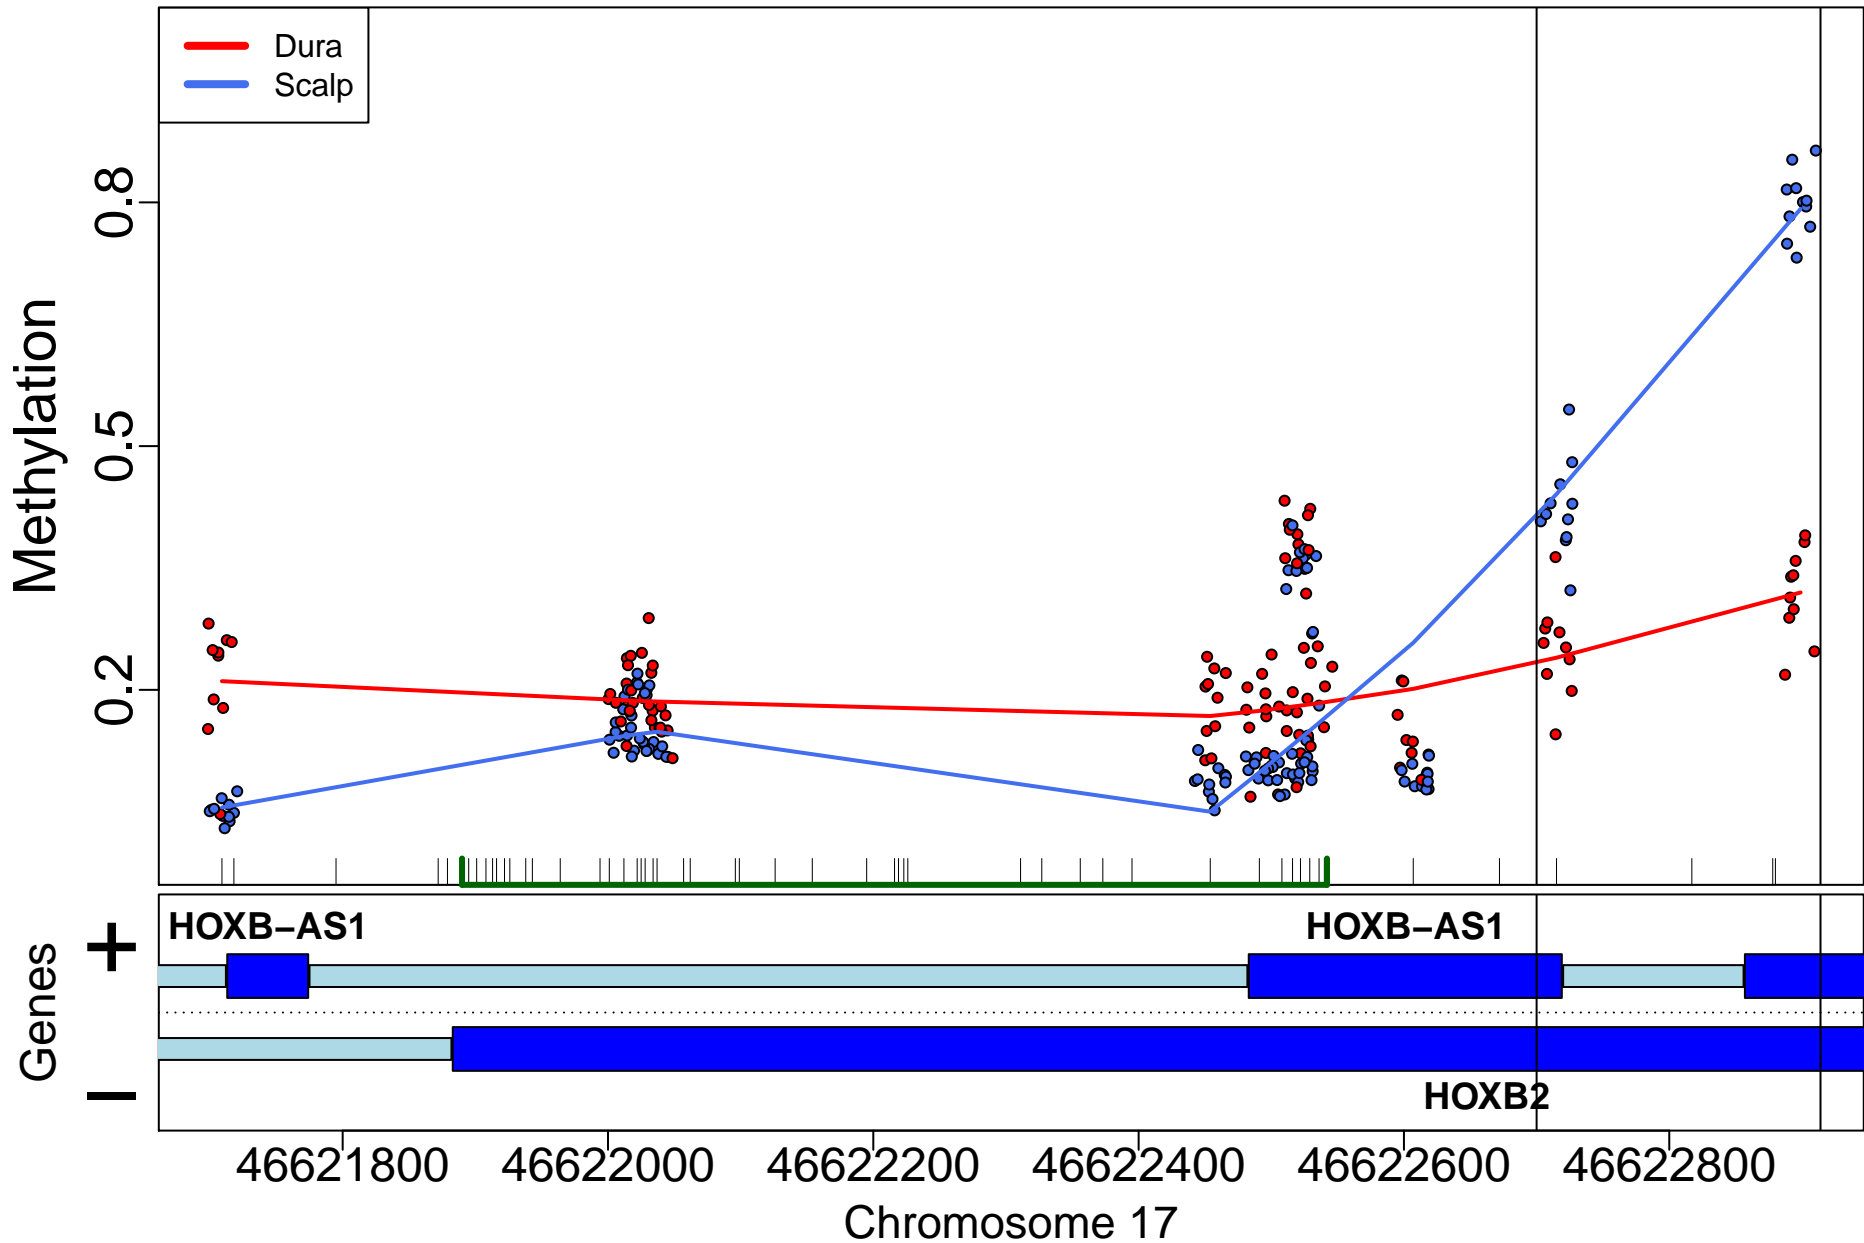

PRDM16; 157940bp from tss:inside intron

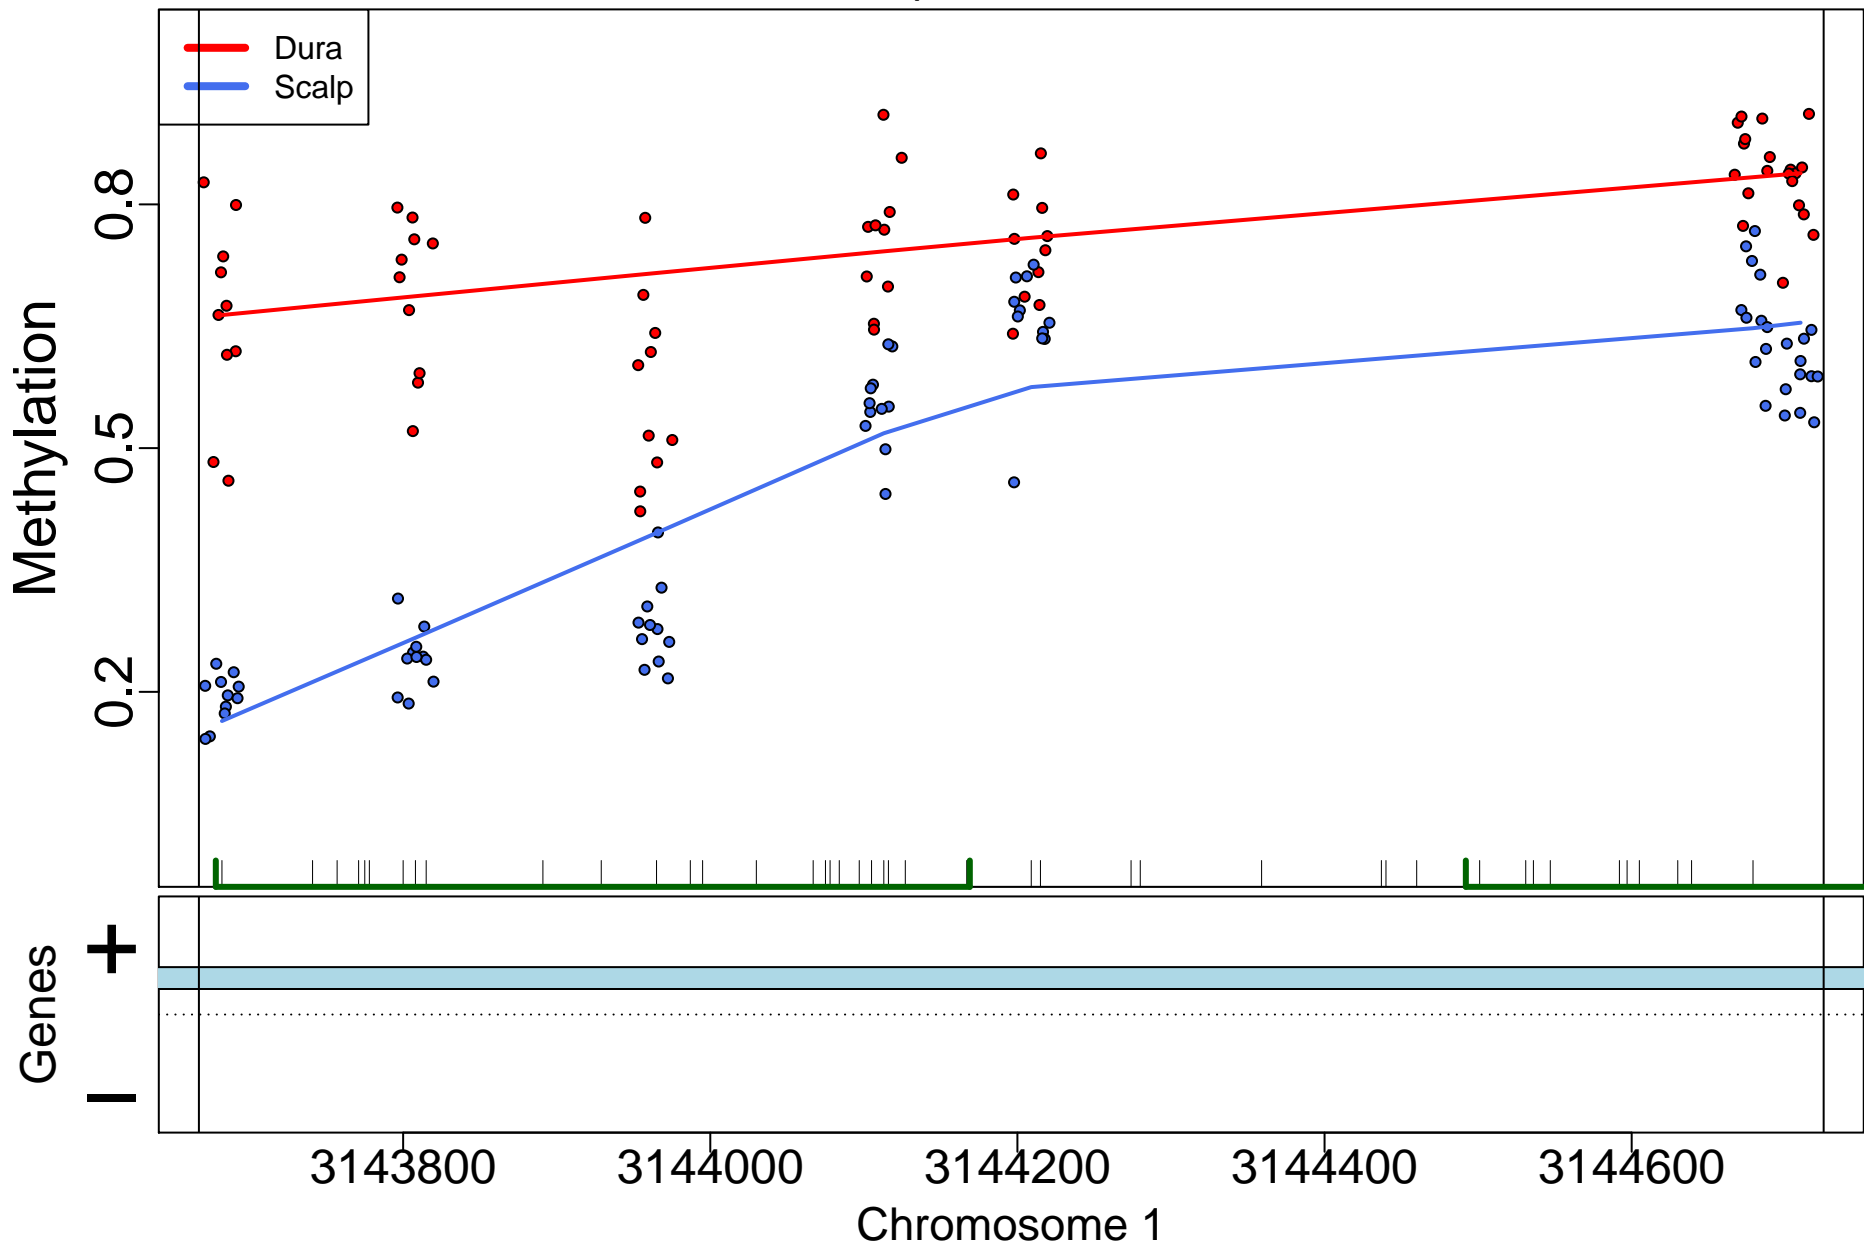

# BRDT; 146bp from tss:promoter

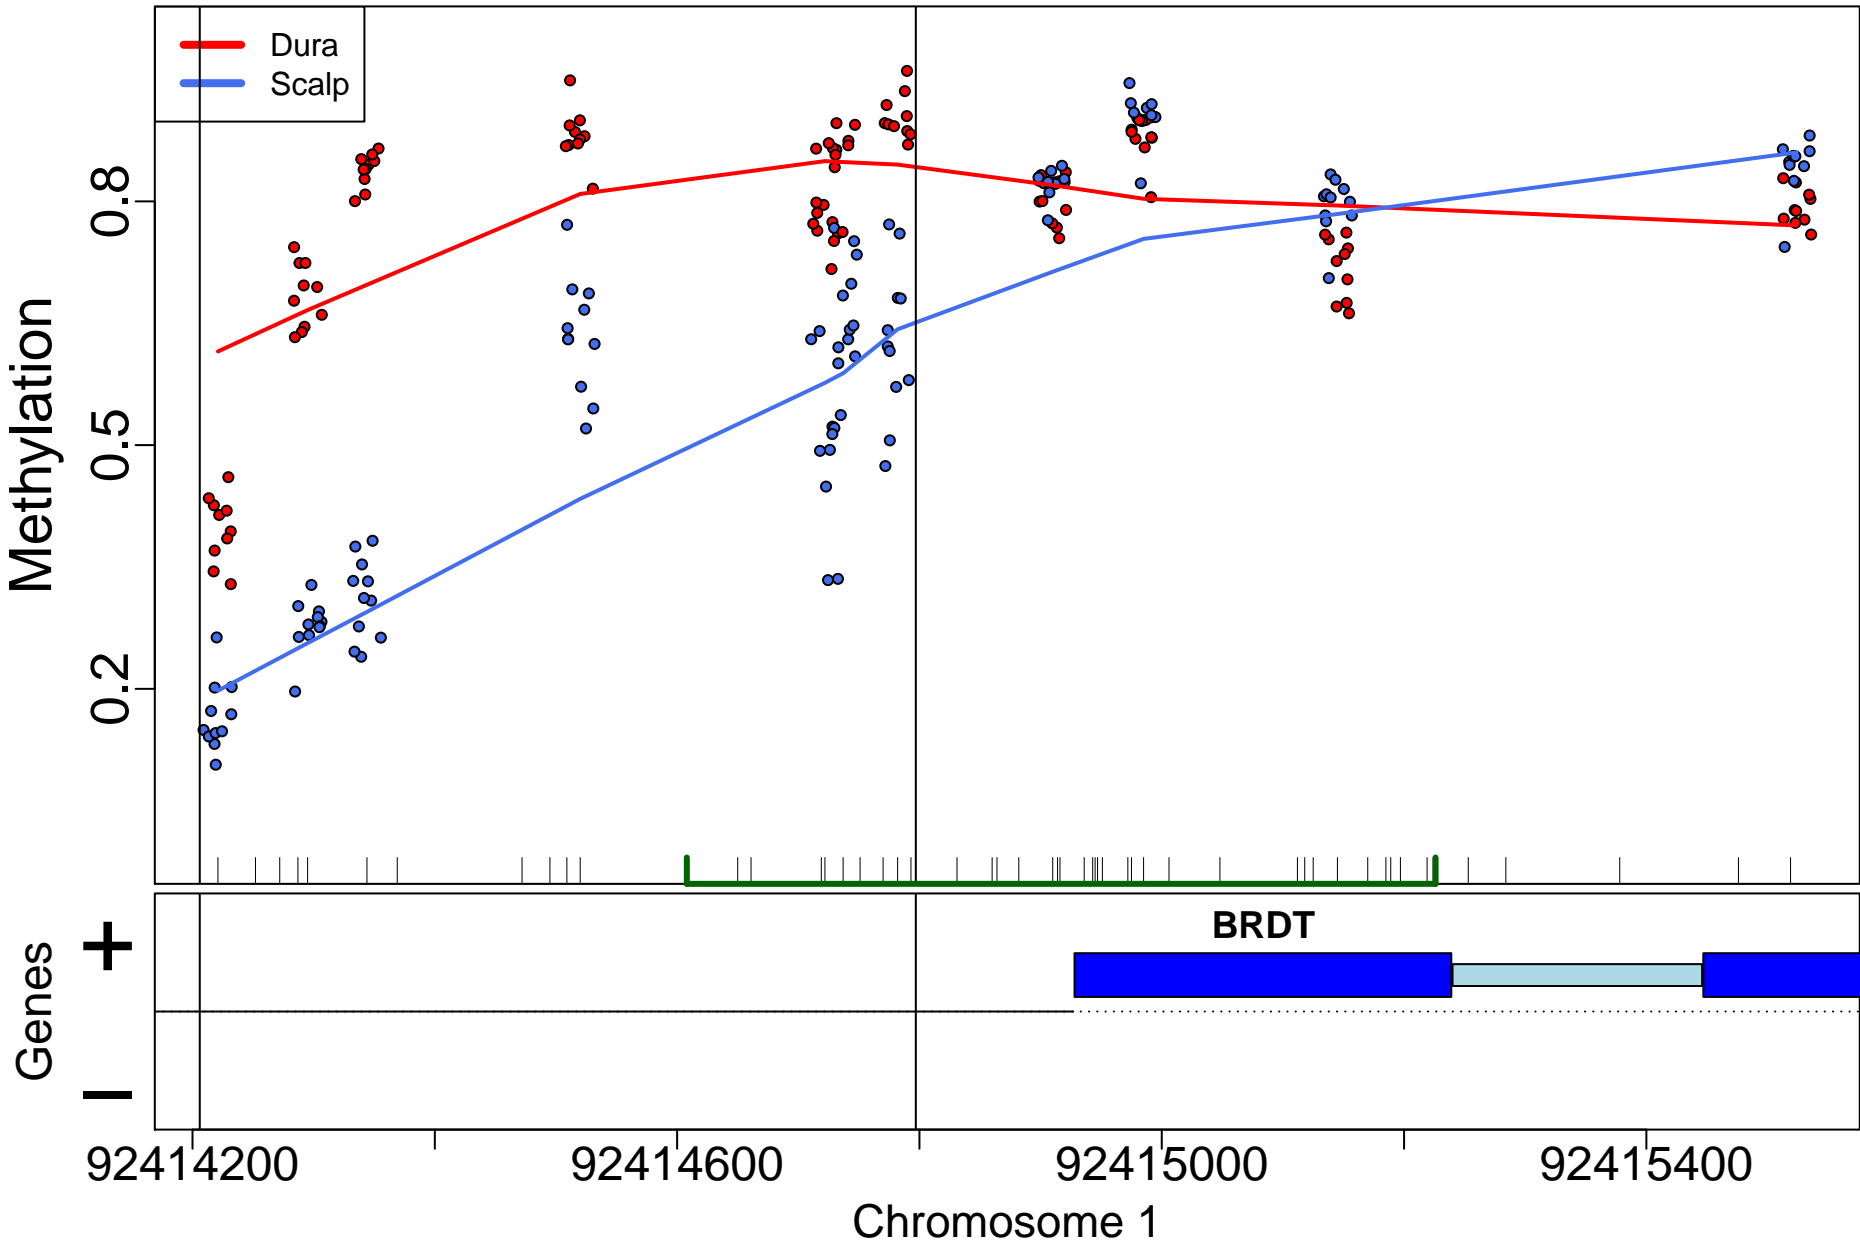

FAM20C; 29676bp from tss:upstream

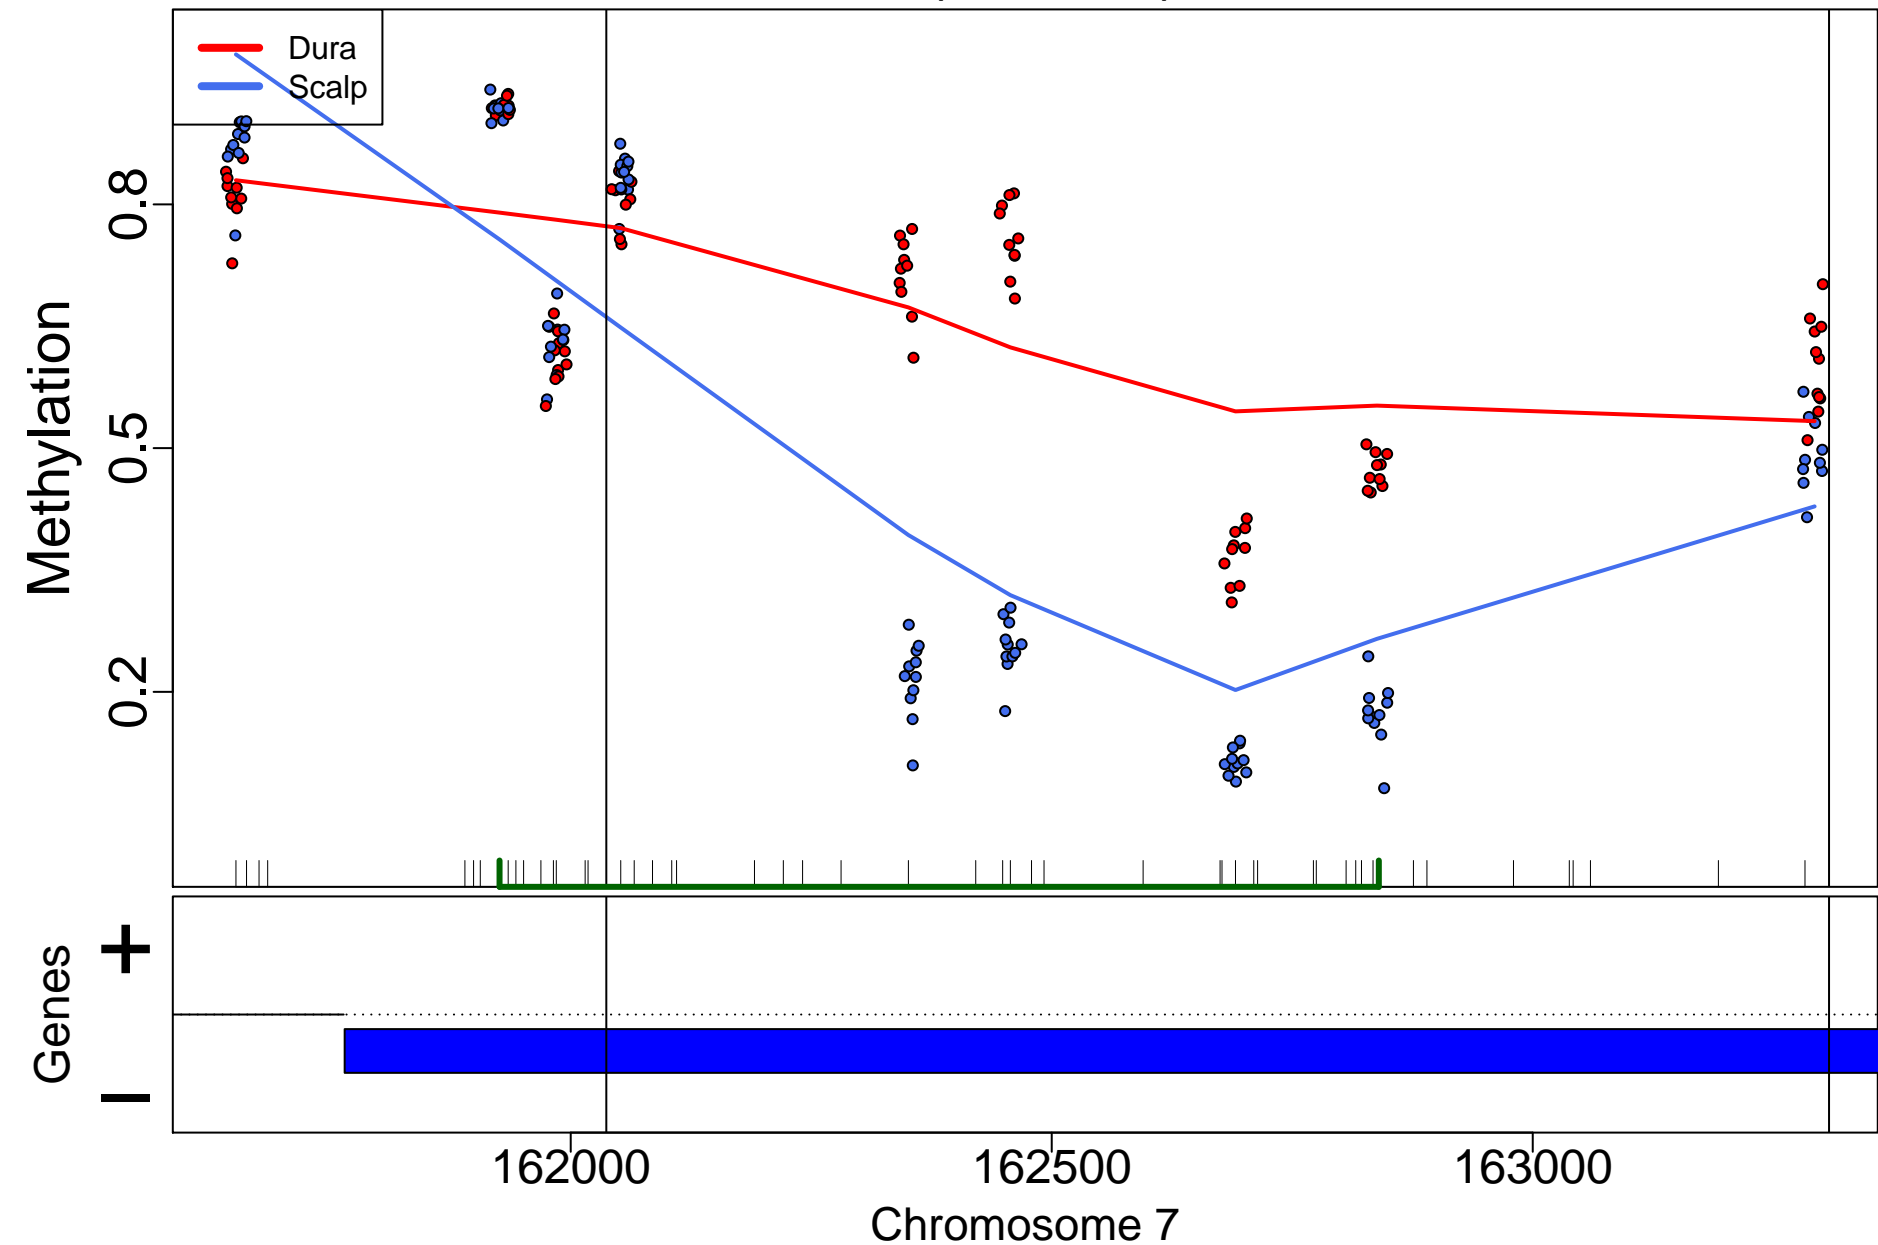

AOX2P; 0bp from tss:NA

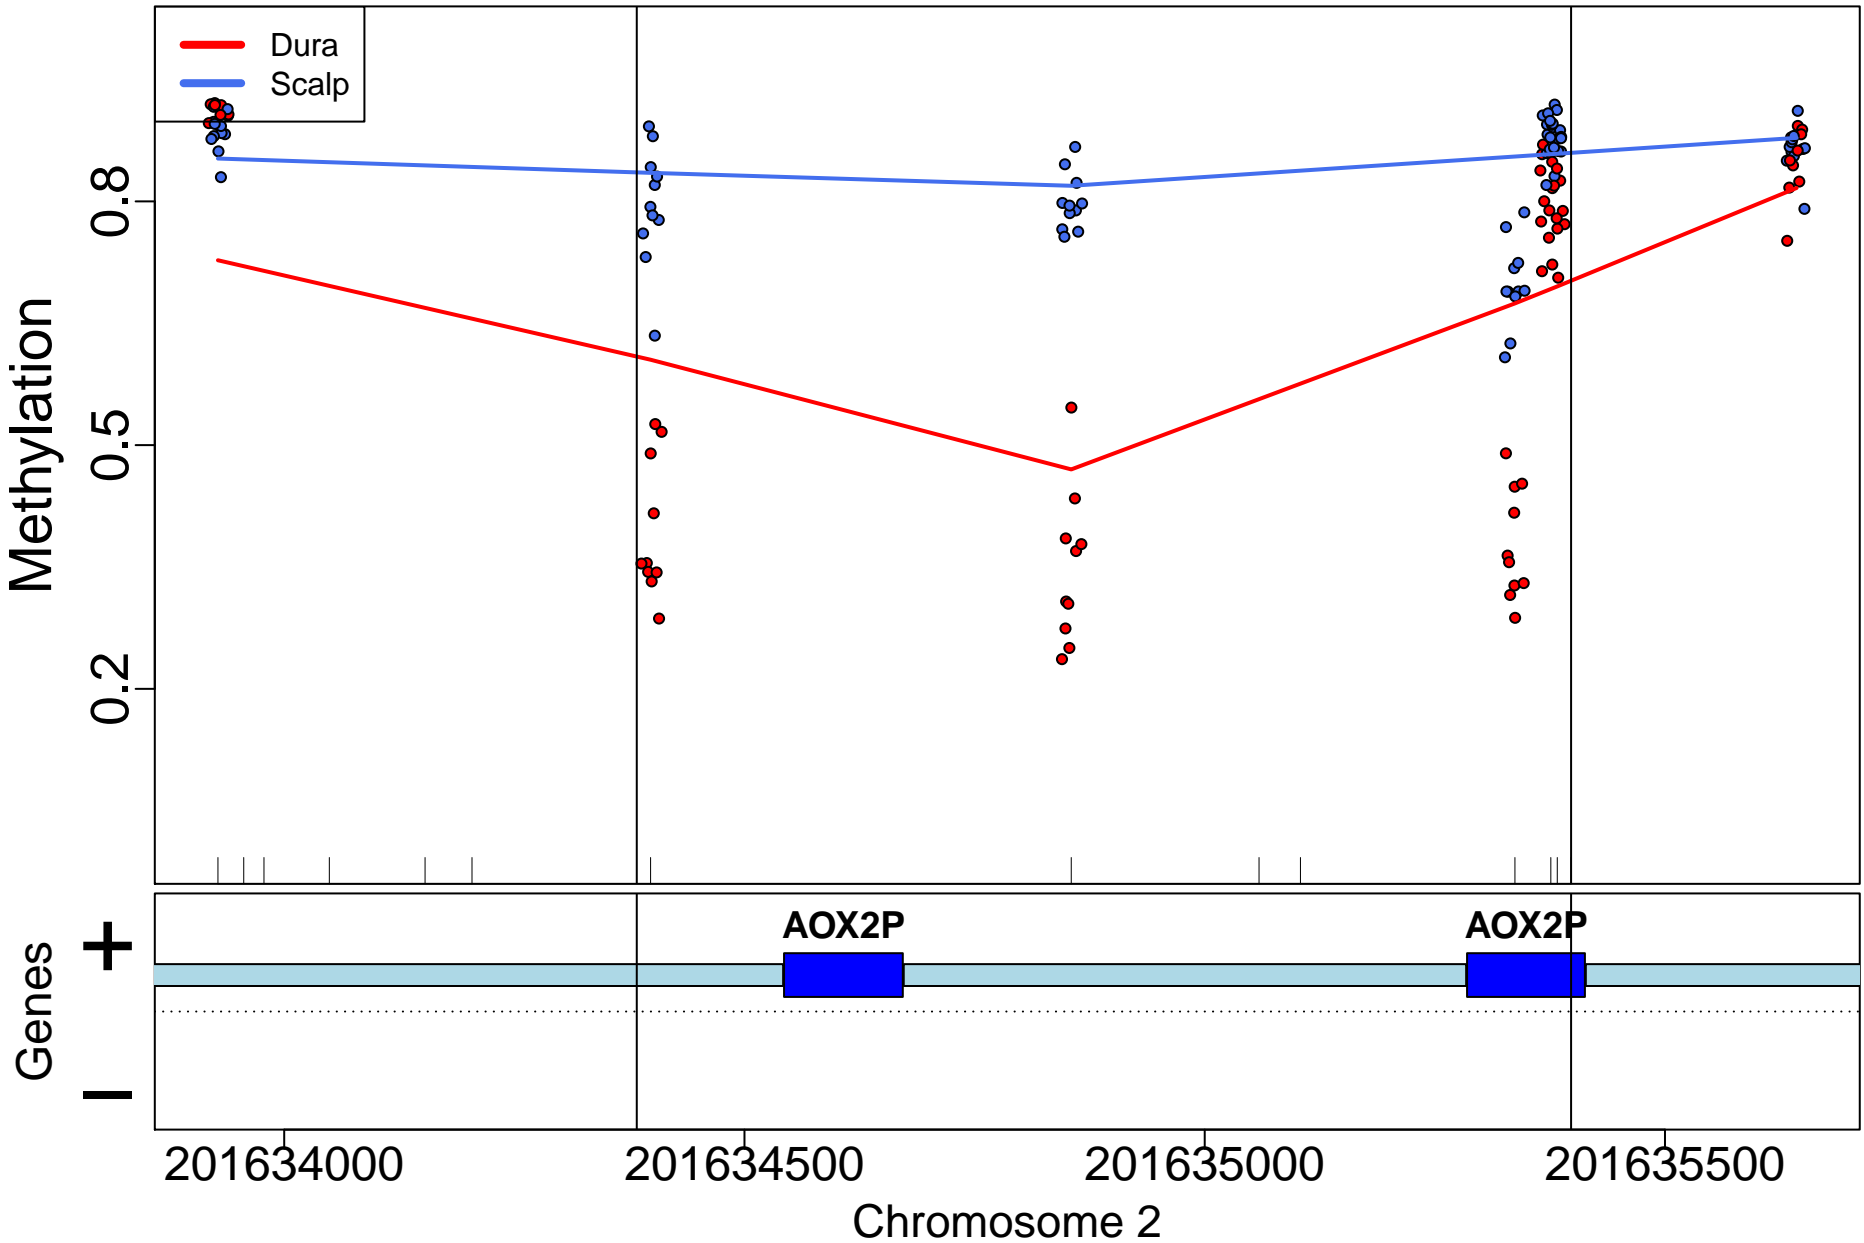

TRPM2; 50bp from tss:inside exon

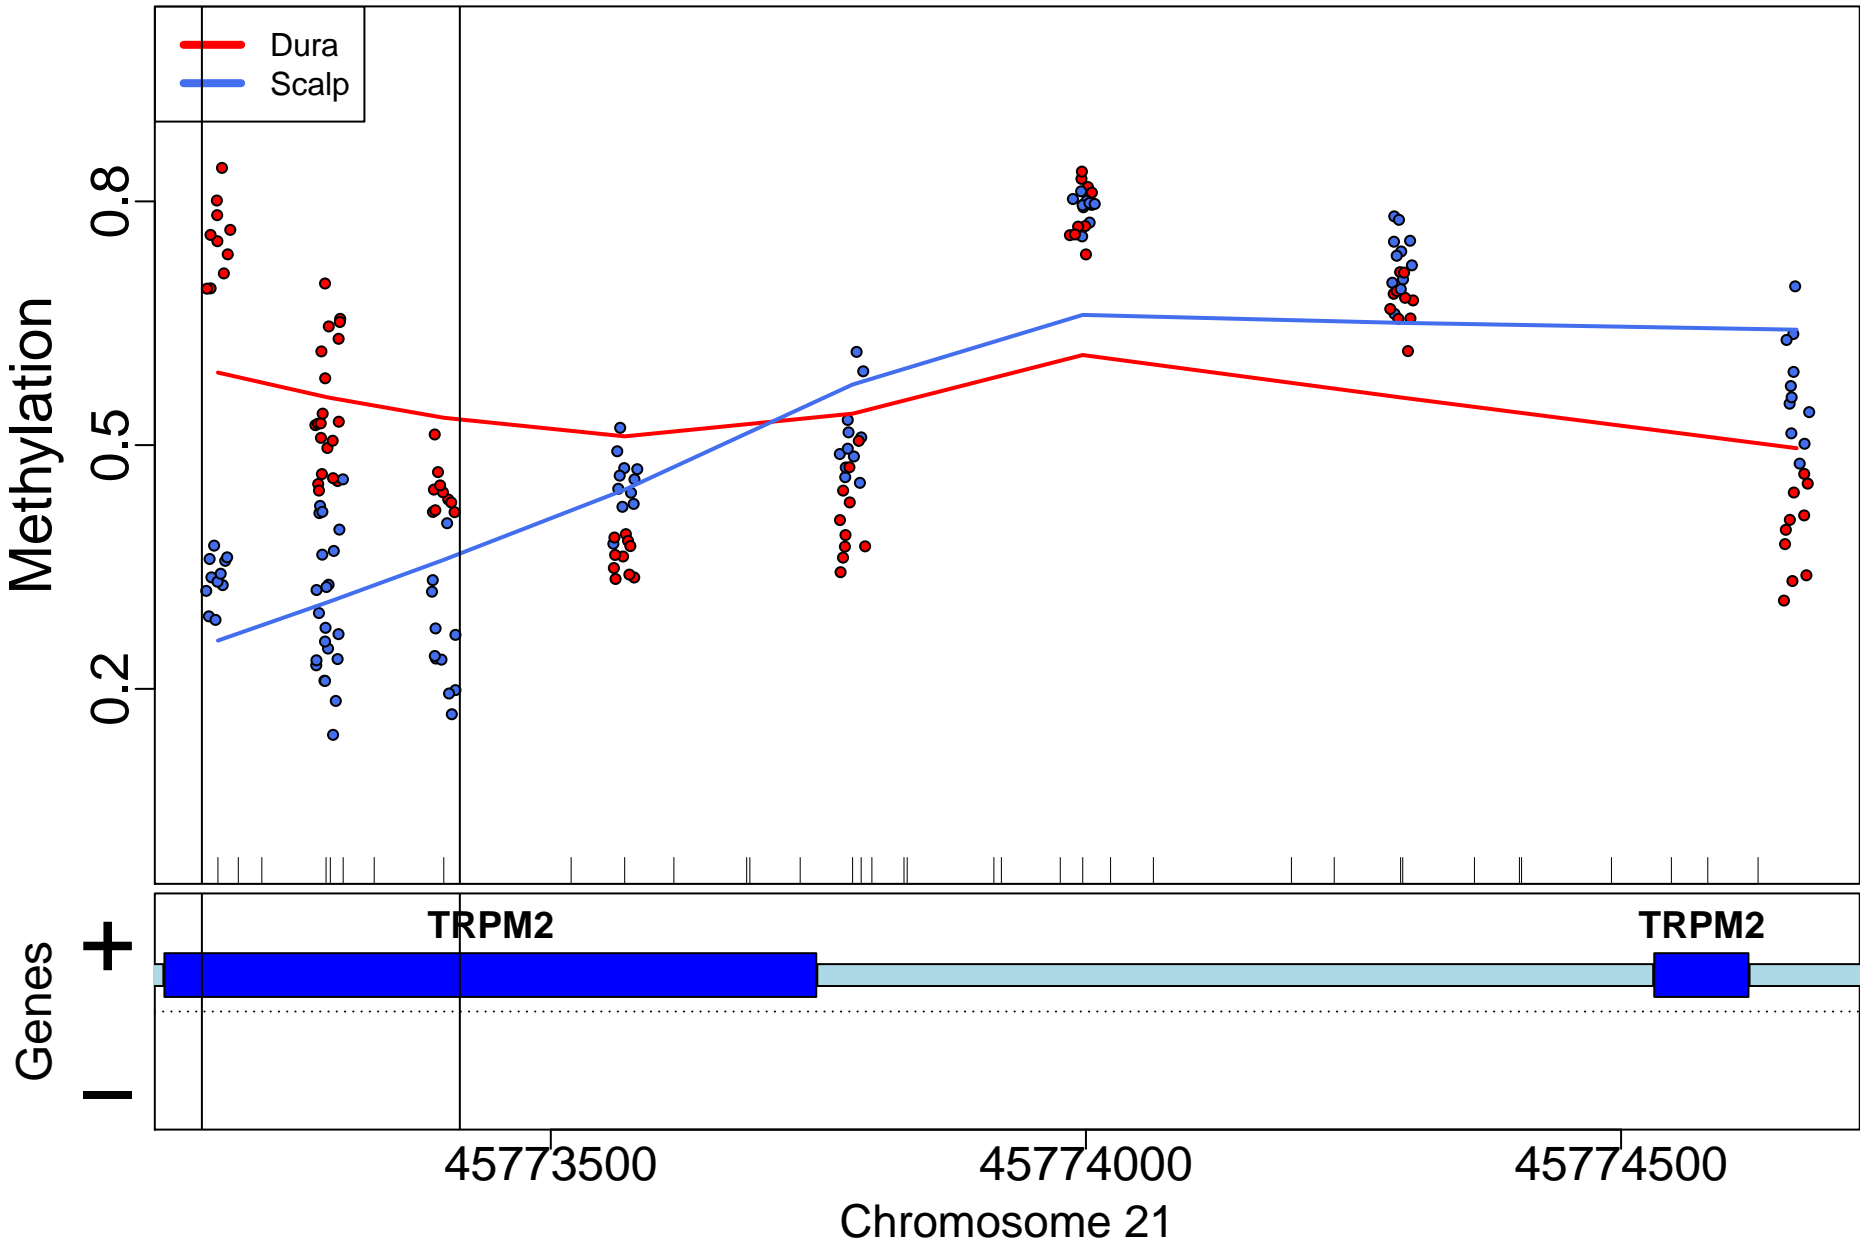



SYBU; 737bp from tss:promoter

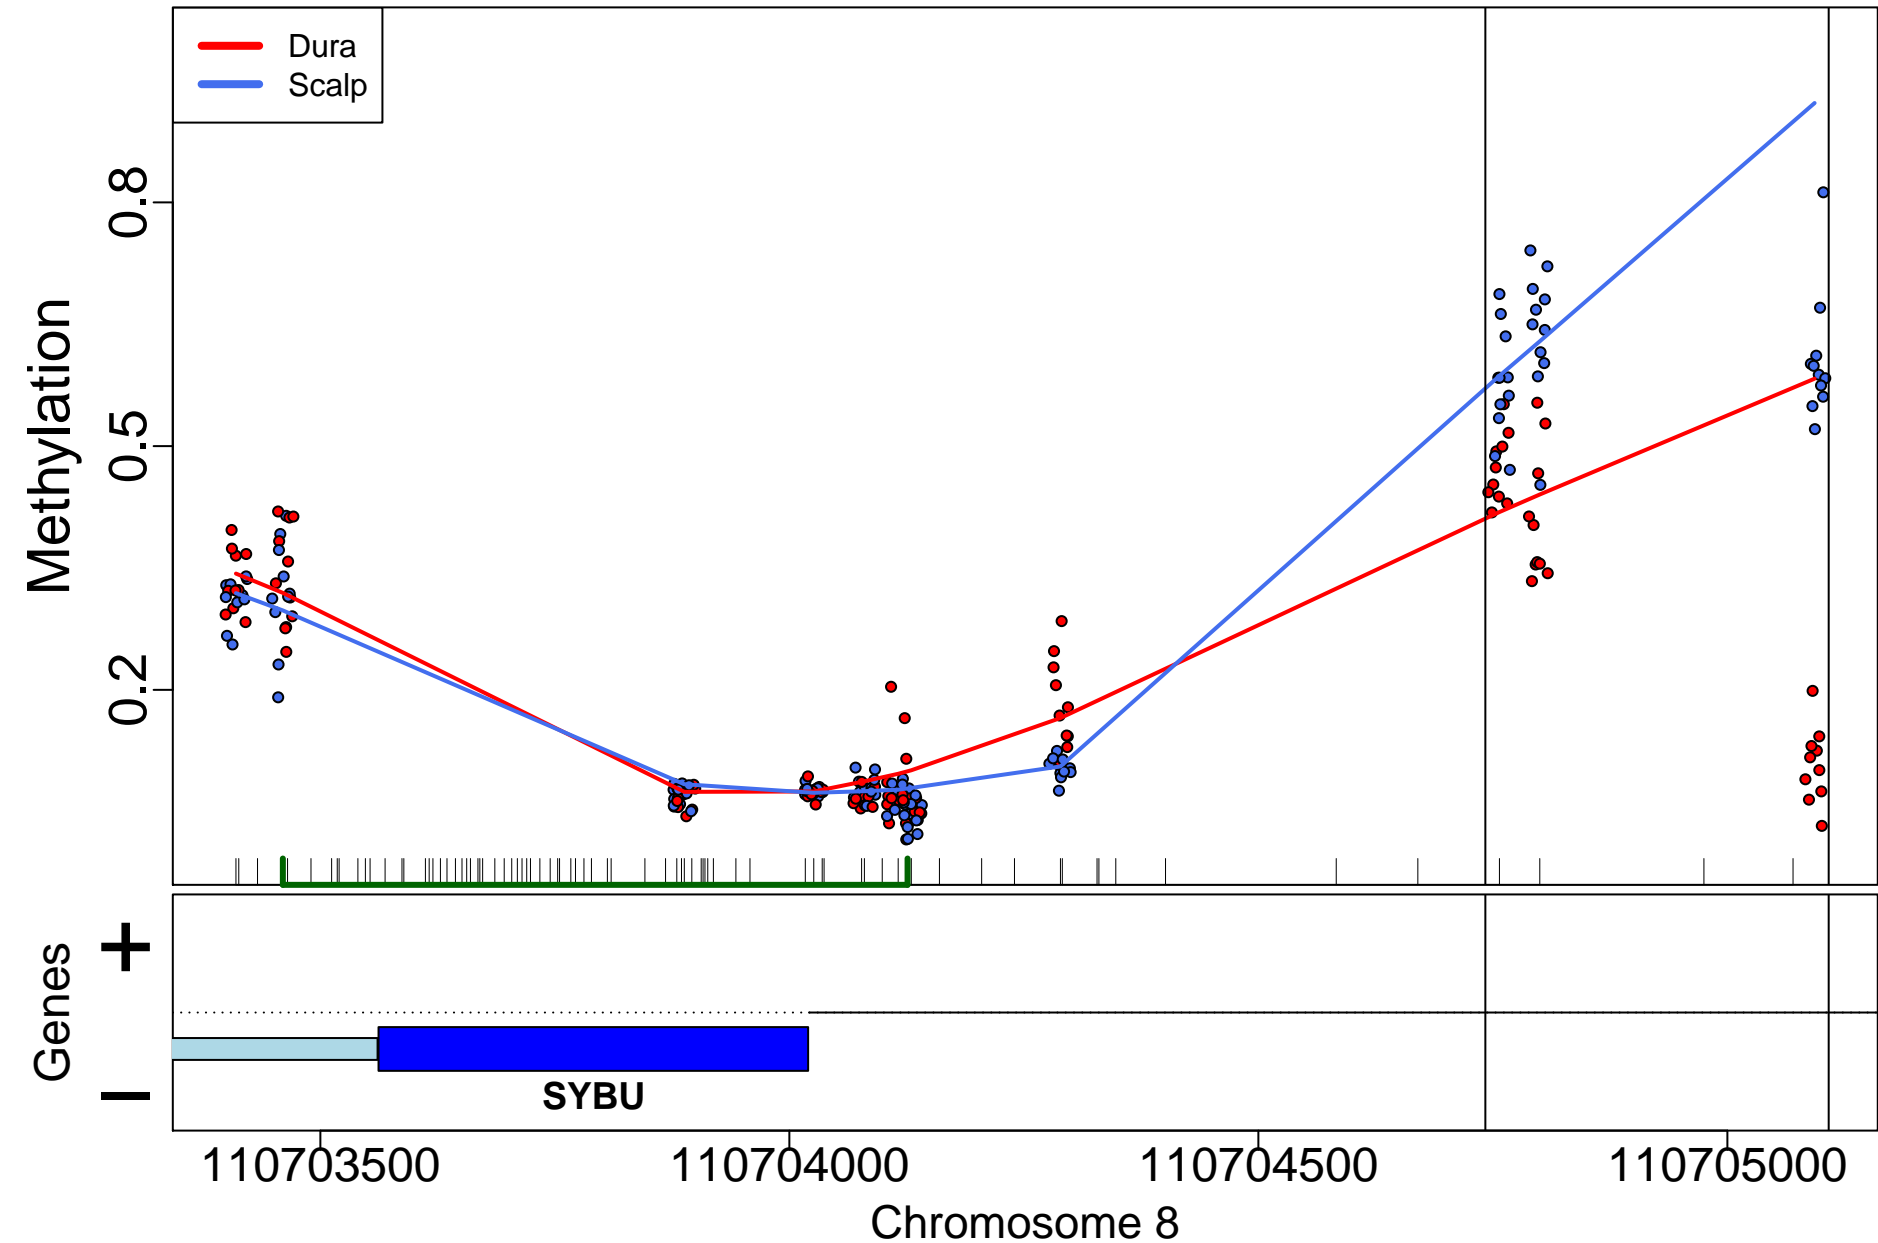

PDE10A; 64863bp from tss:upstream

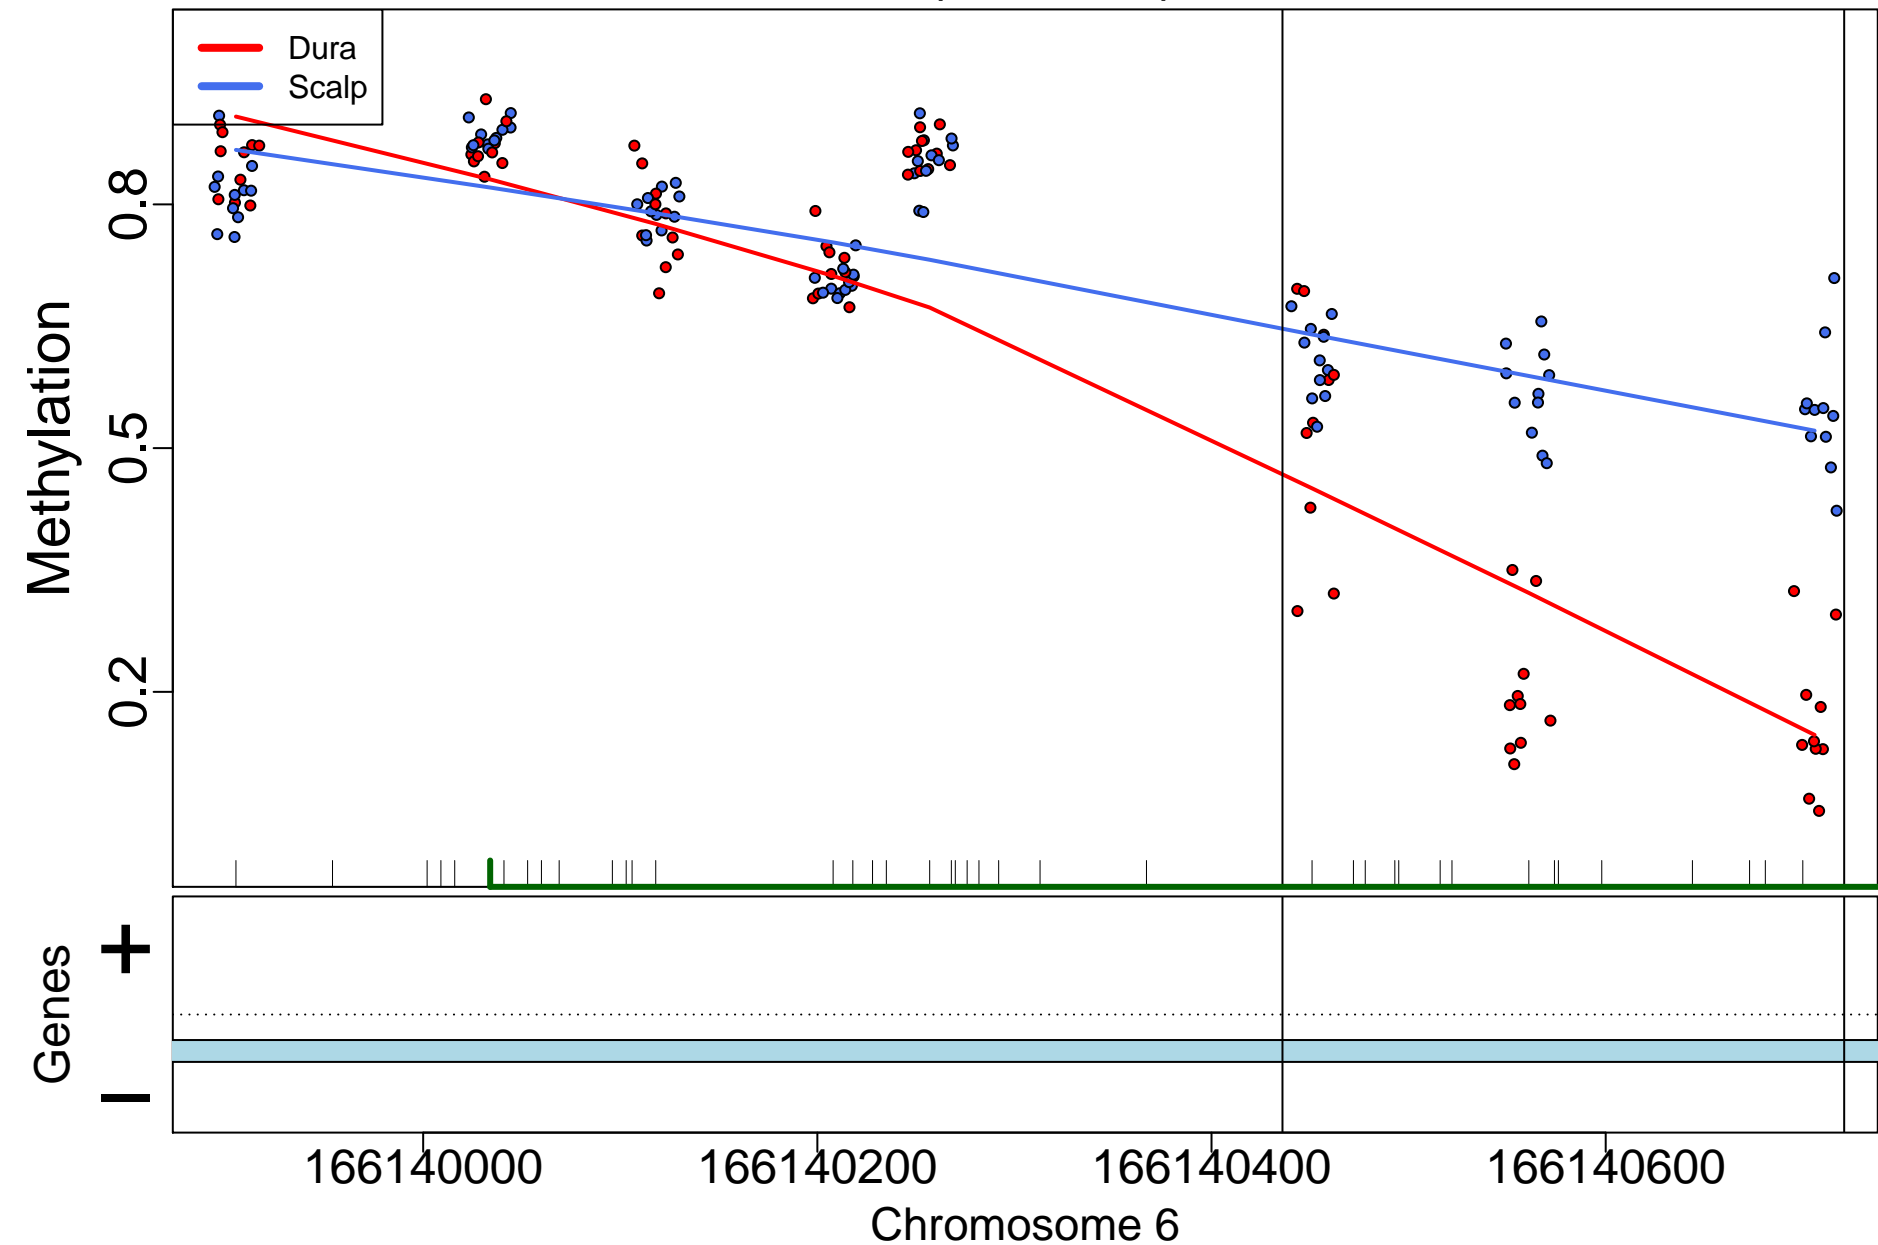



TBX15; 9654bp from tss:upstream

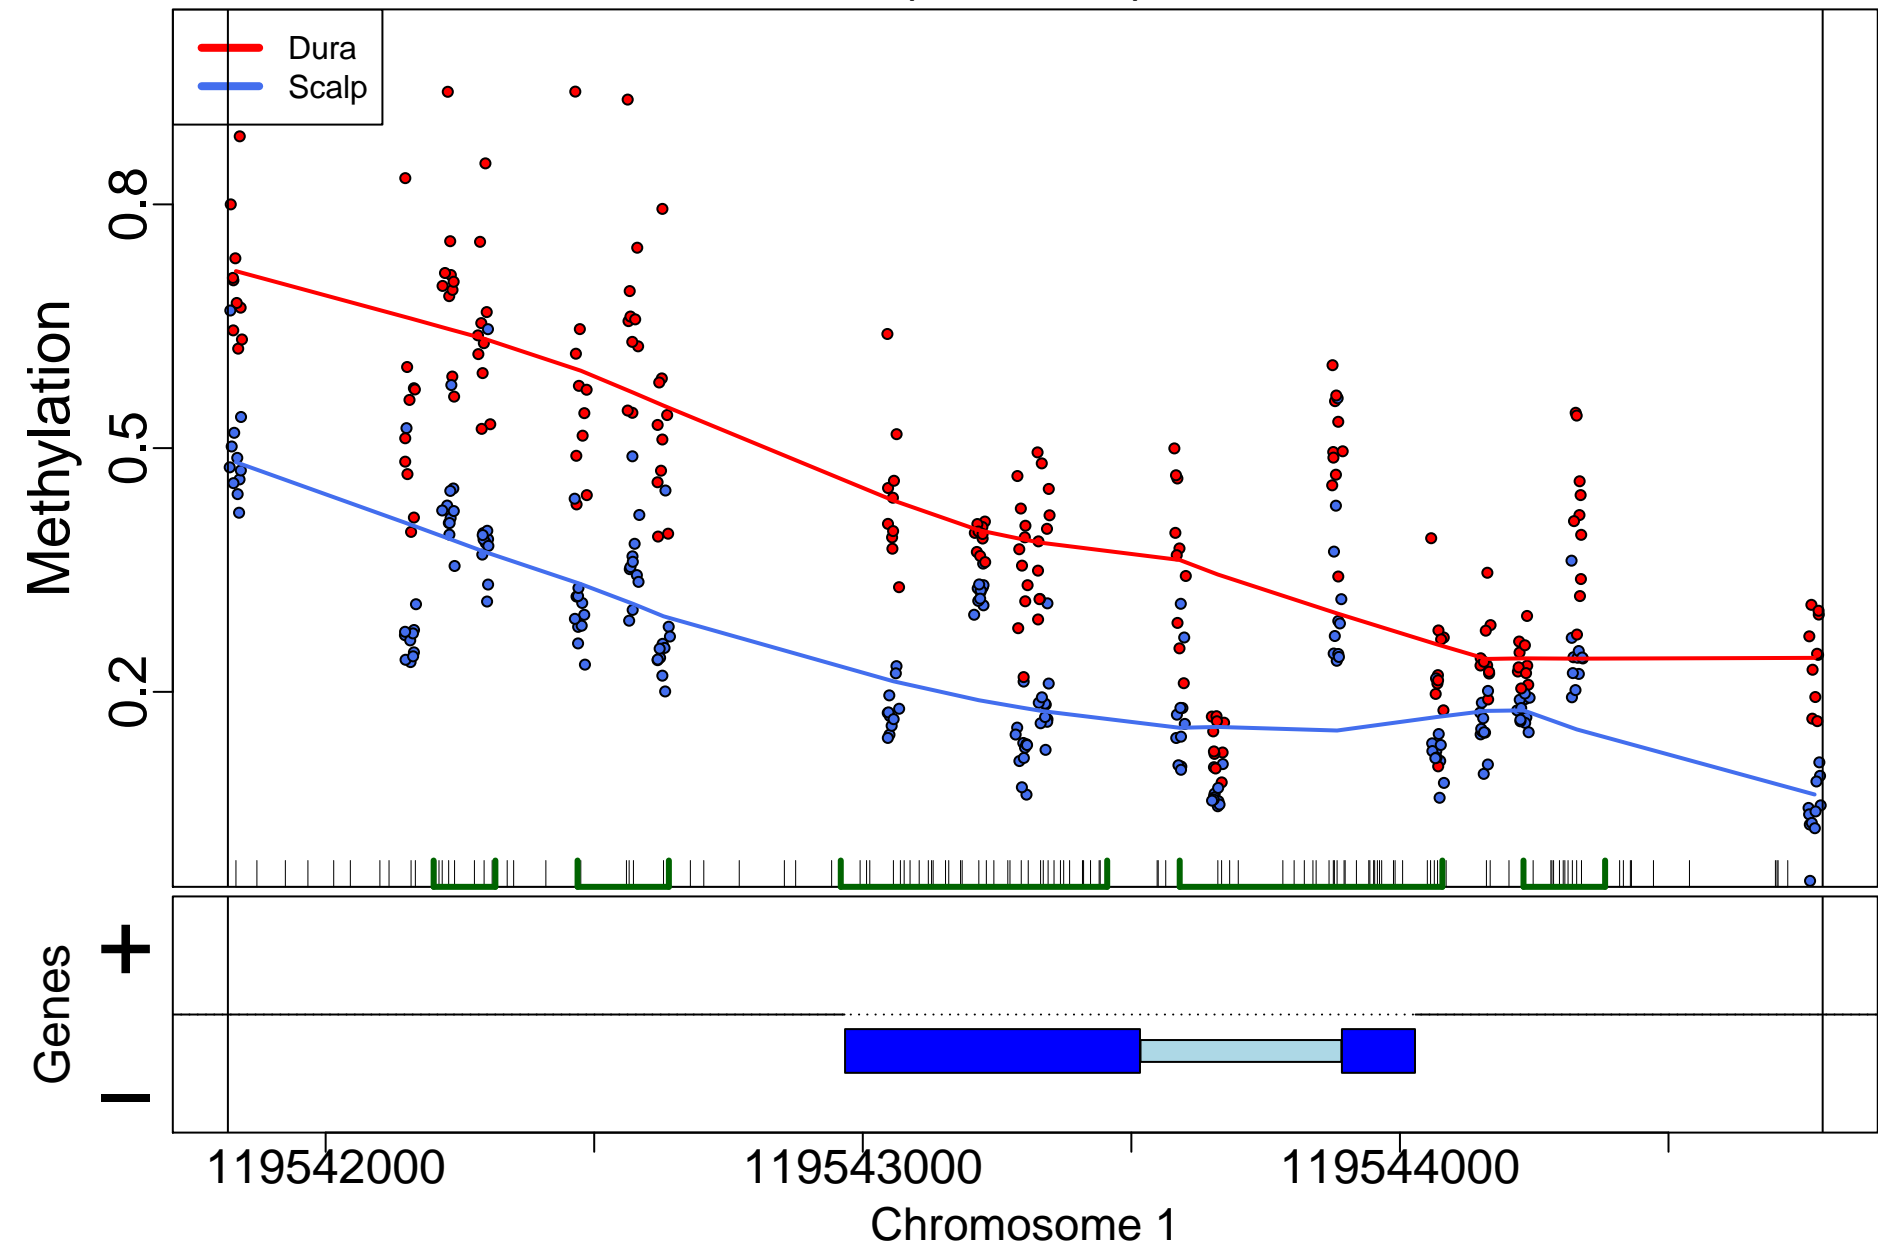

BAI1; 0bp from tss:overlaps 5'

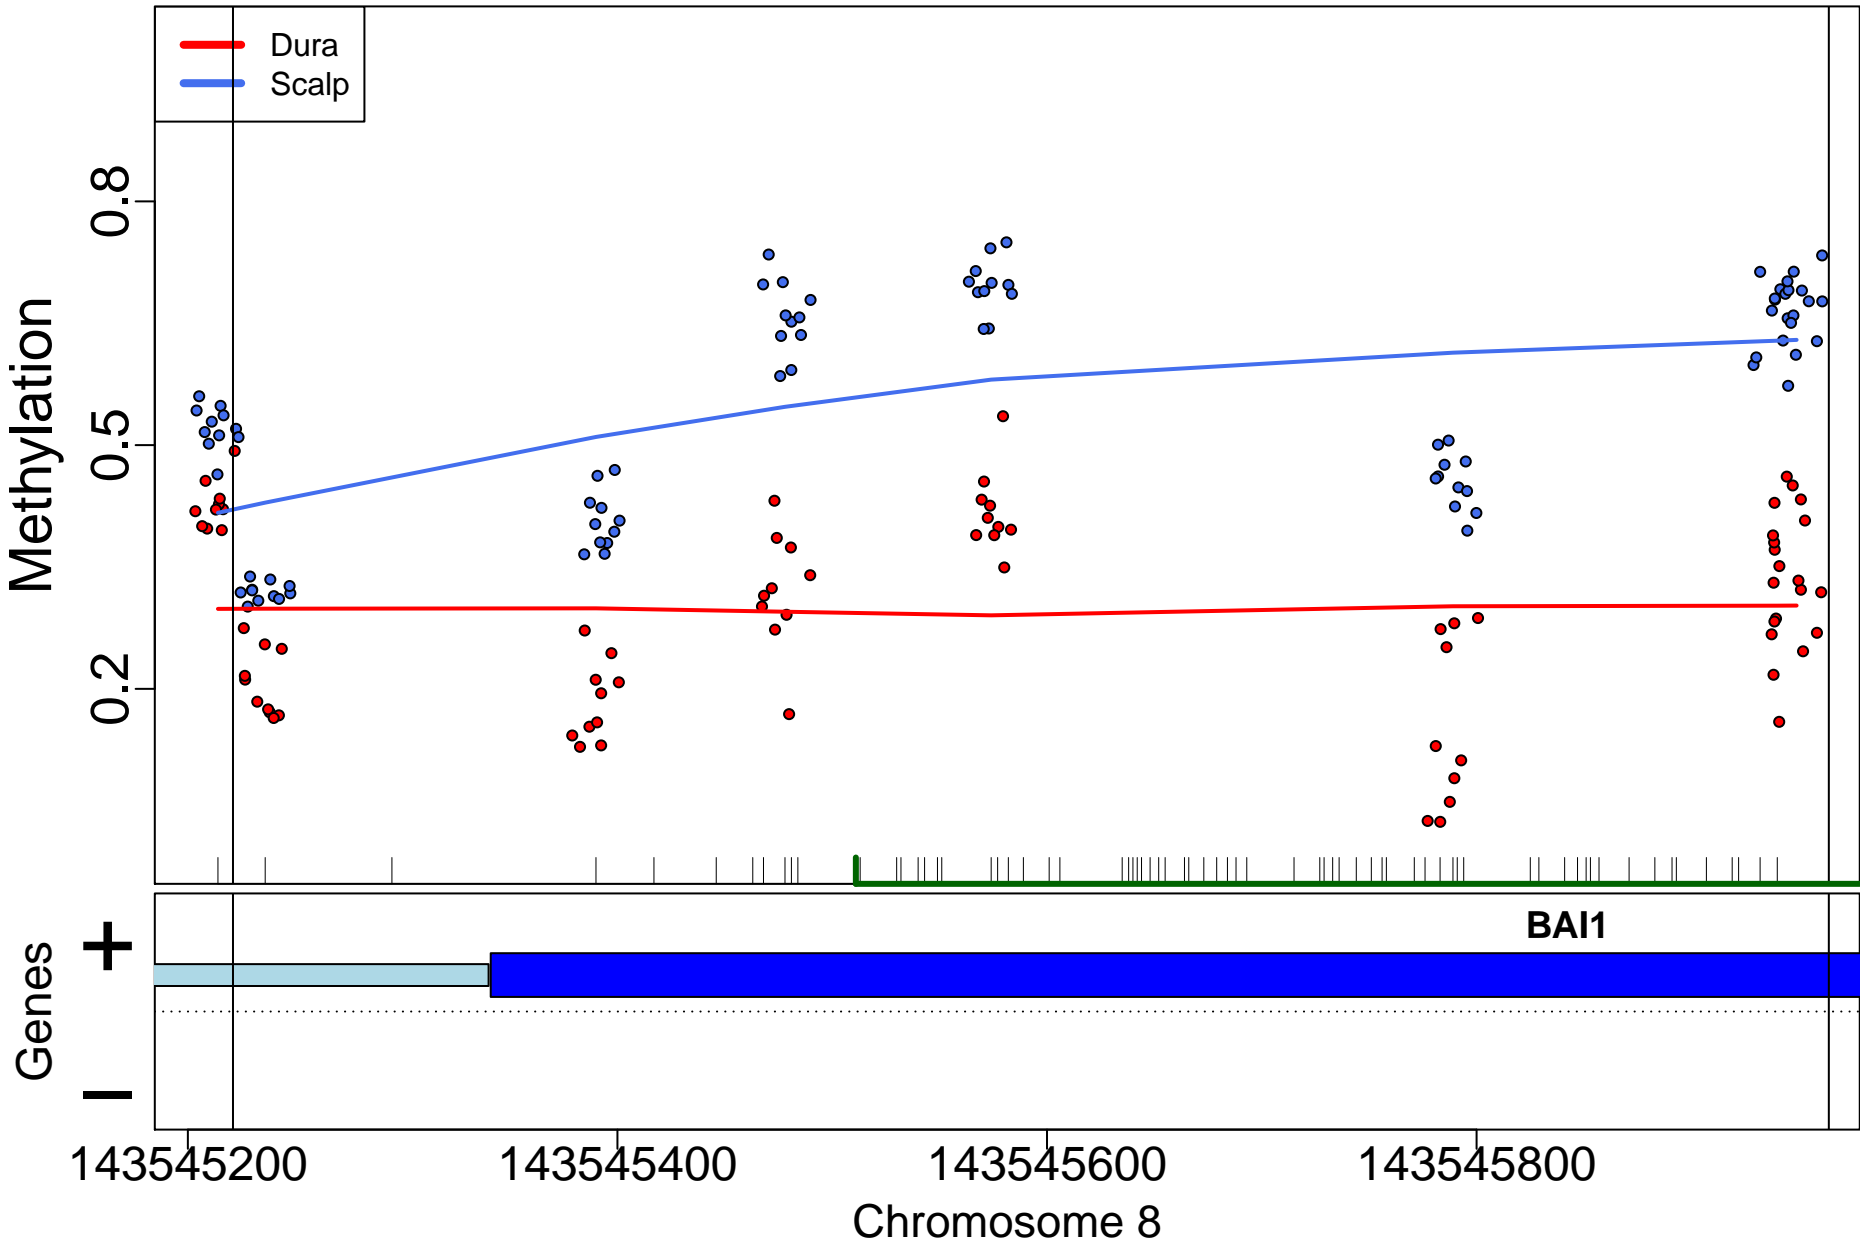

HSPB3; 0bp from tss:overlaps 5'

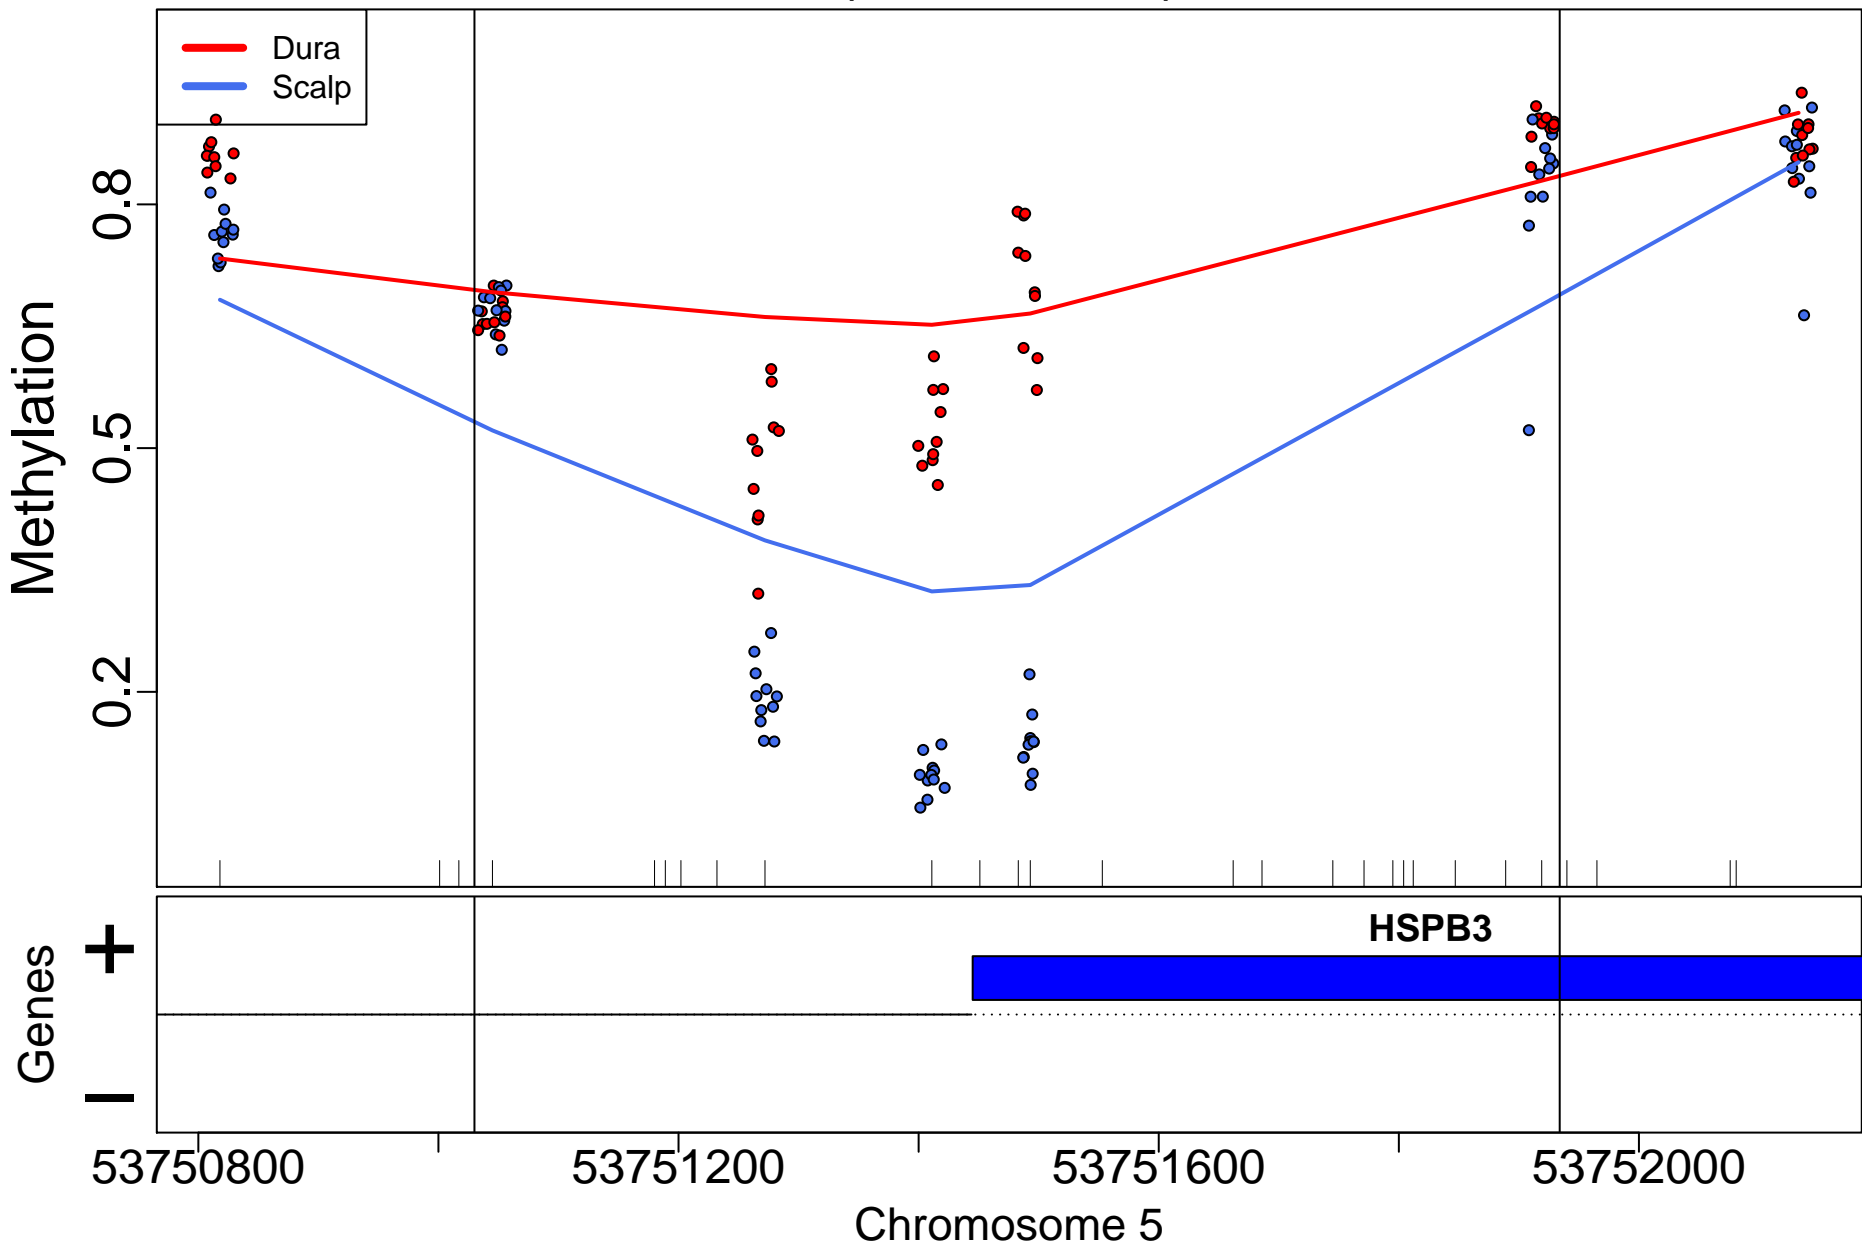

LINC00443; 0bp from tss:NA

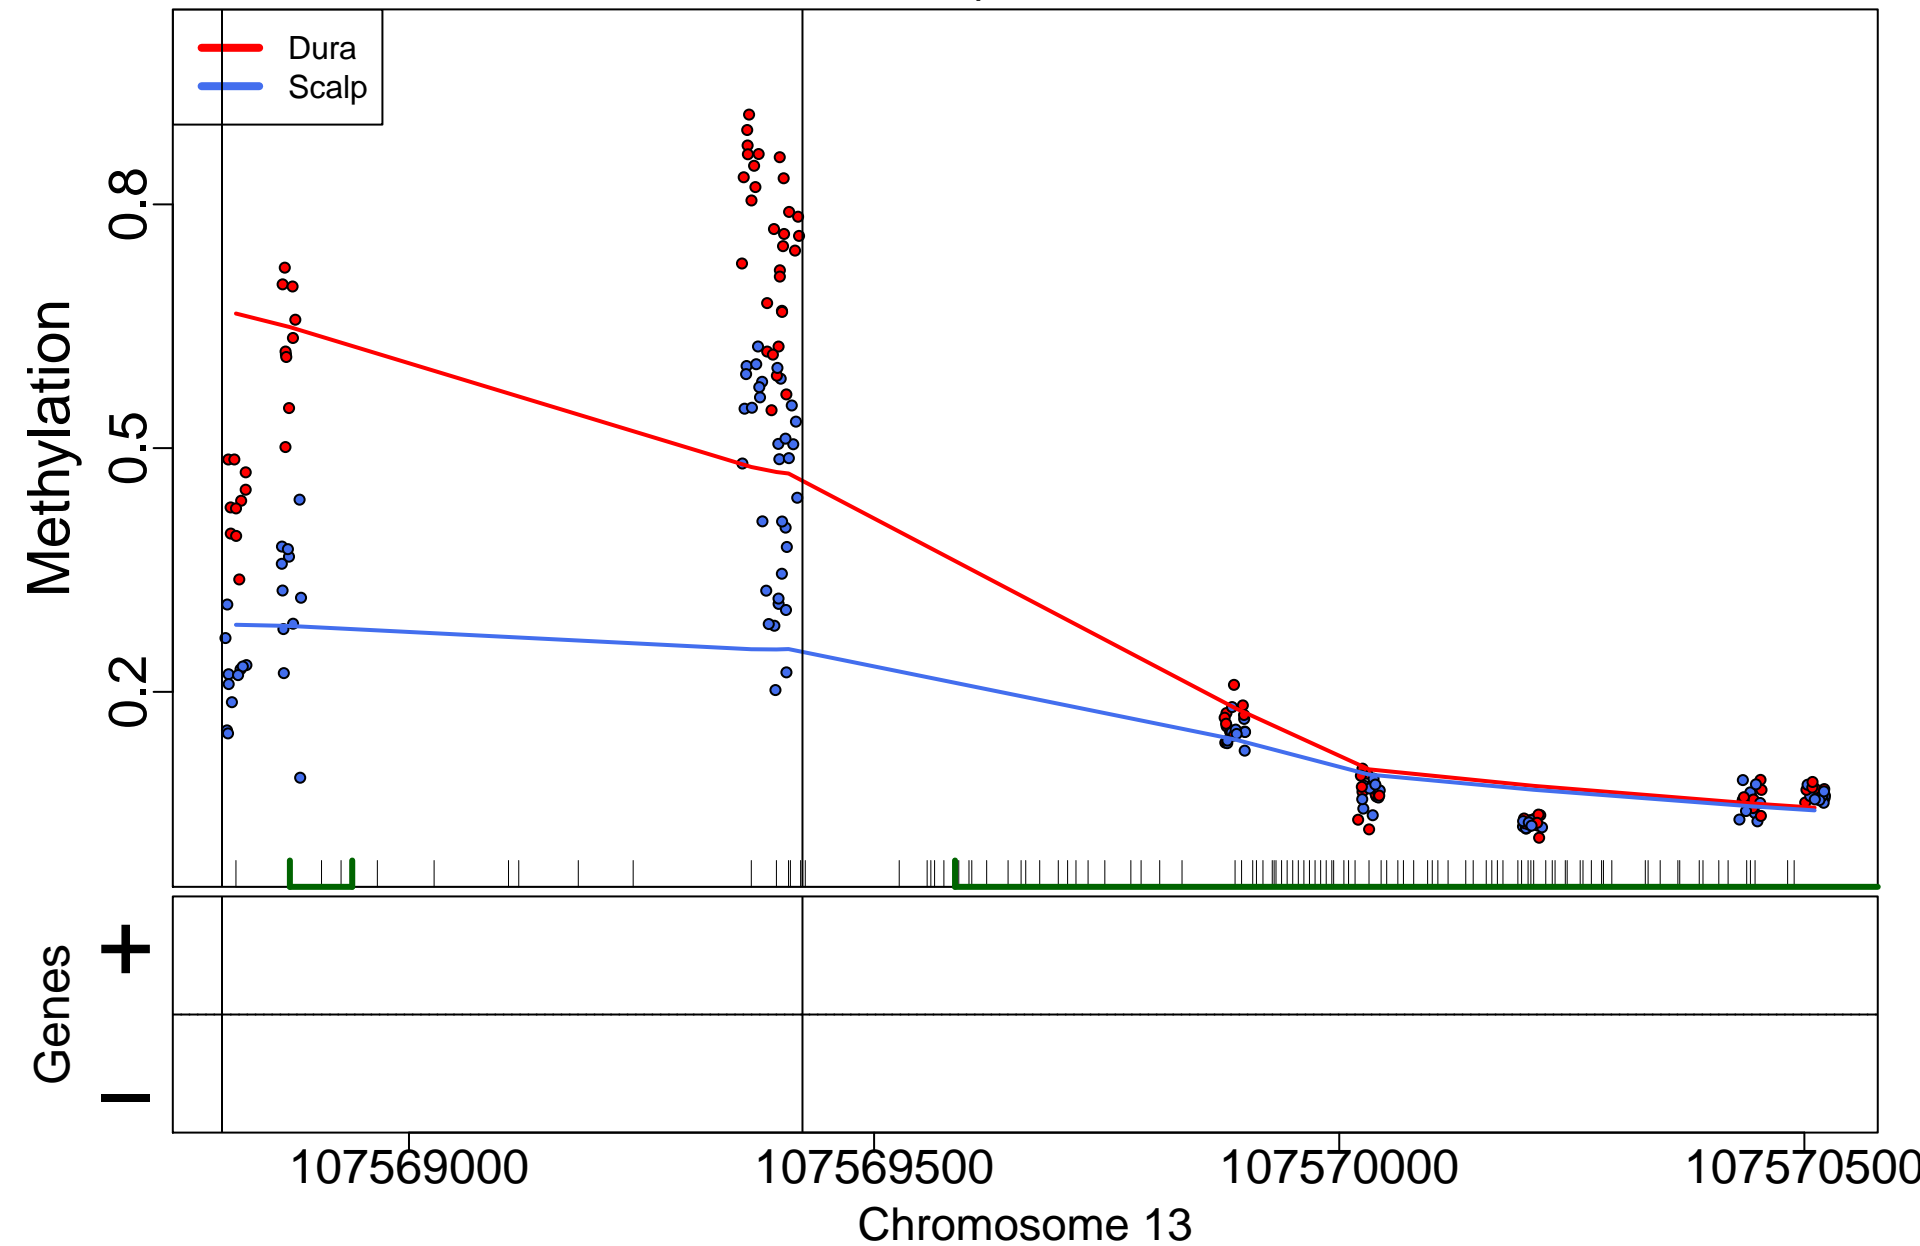

BCL11A; 4331bp from tss:inside intron

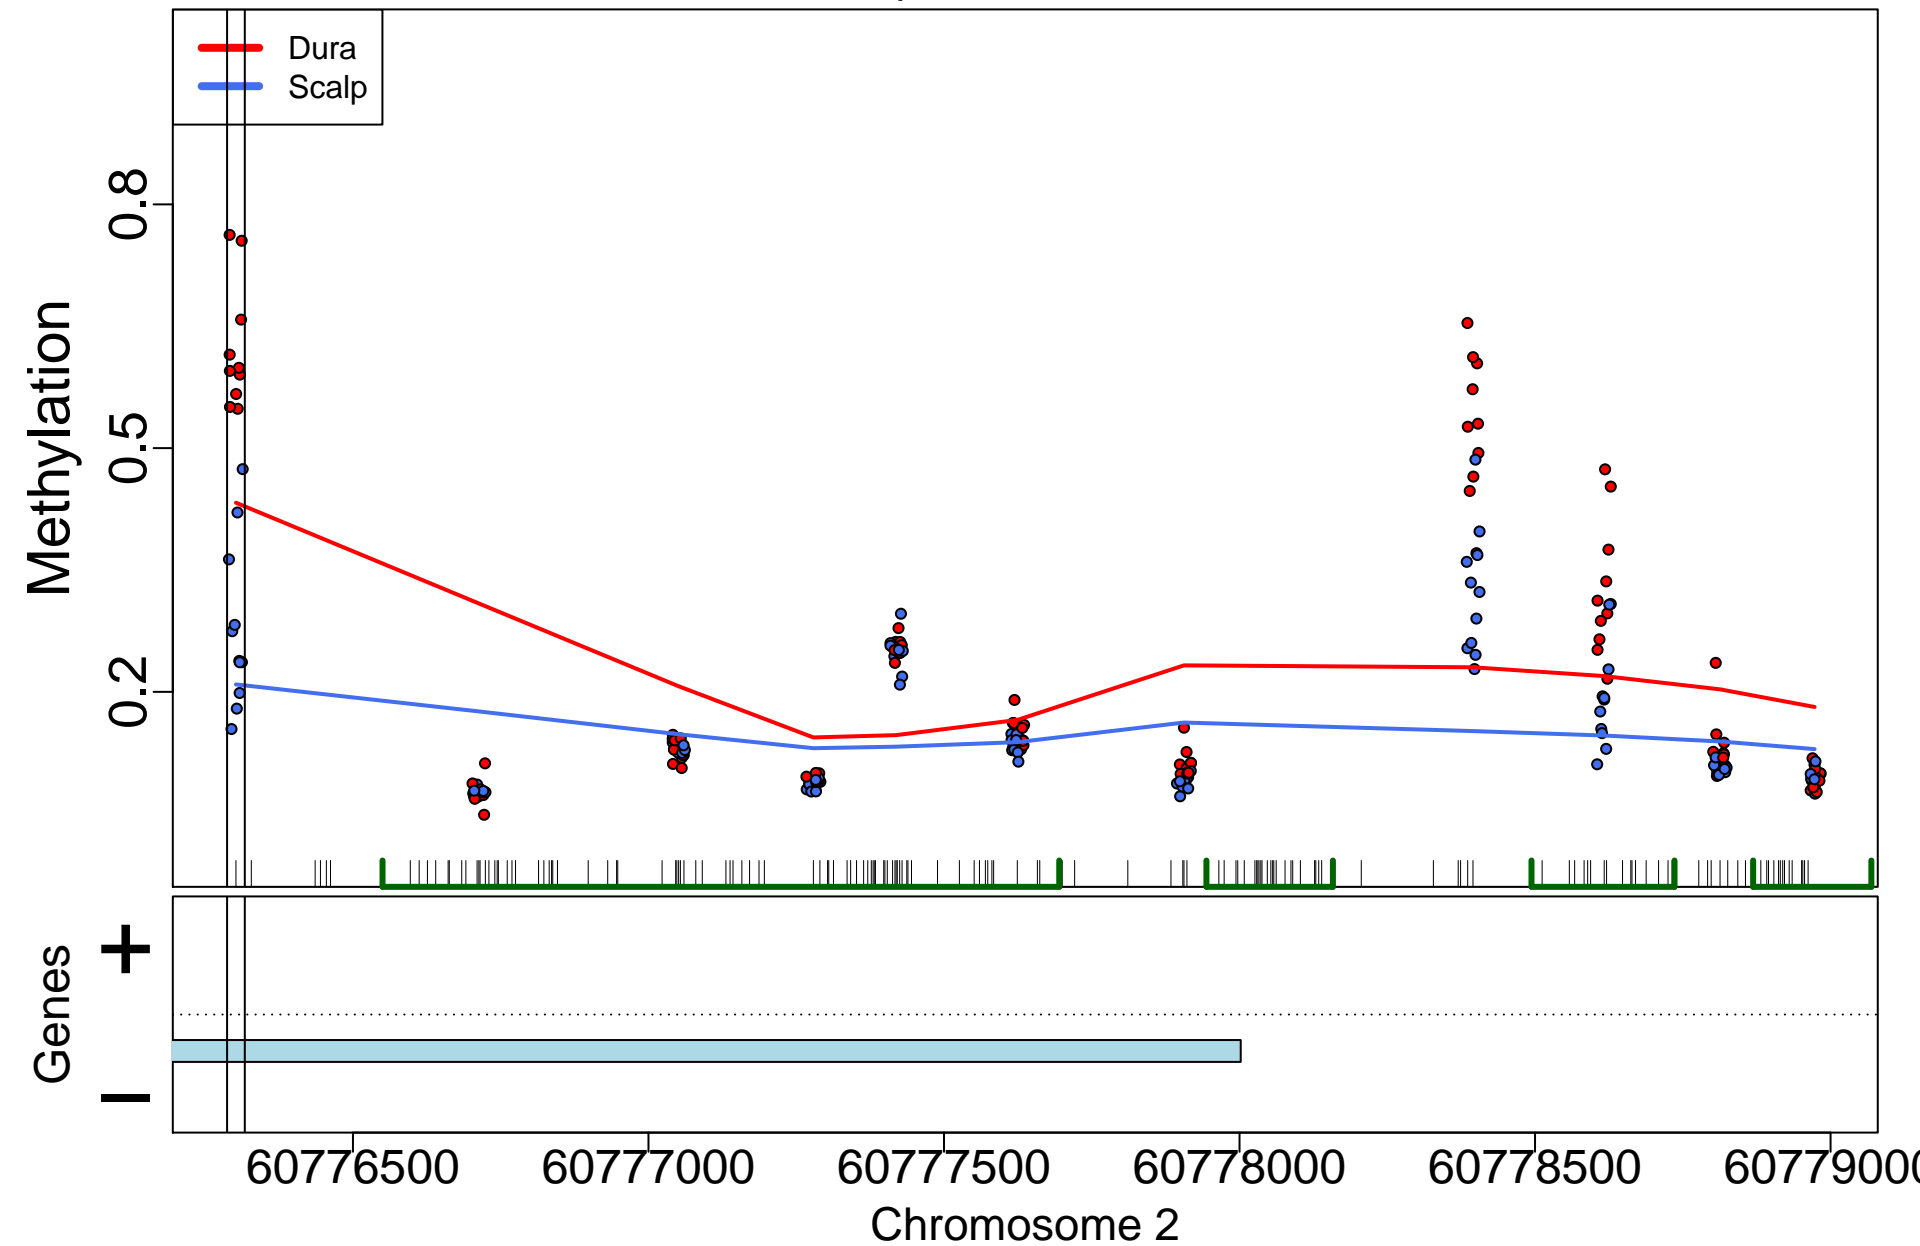



FOXD2; 7545bp from tss:downstream

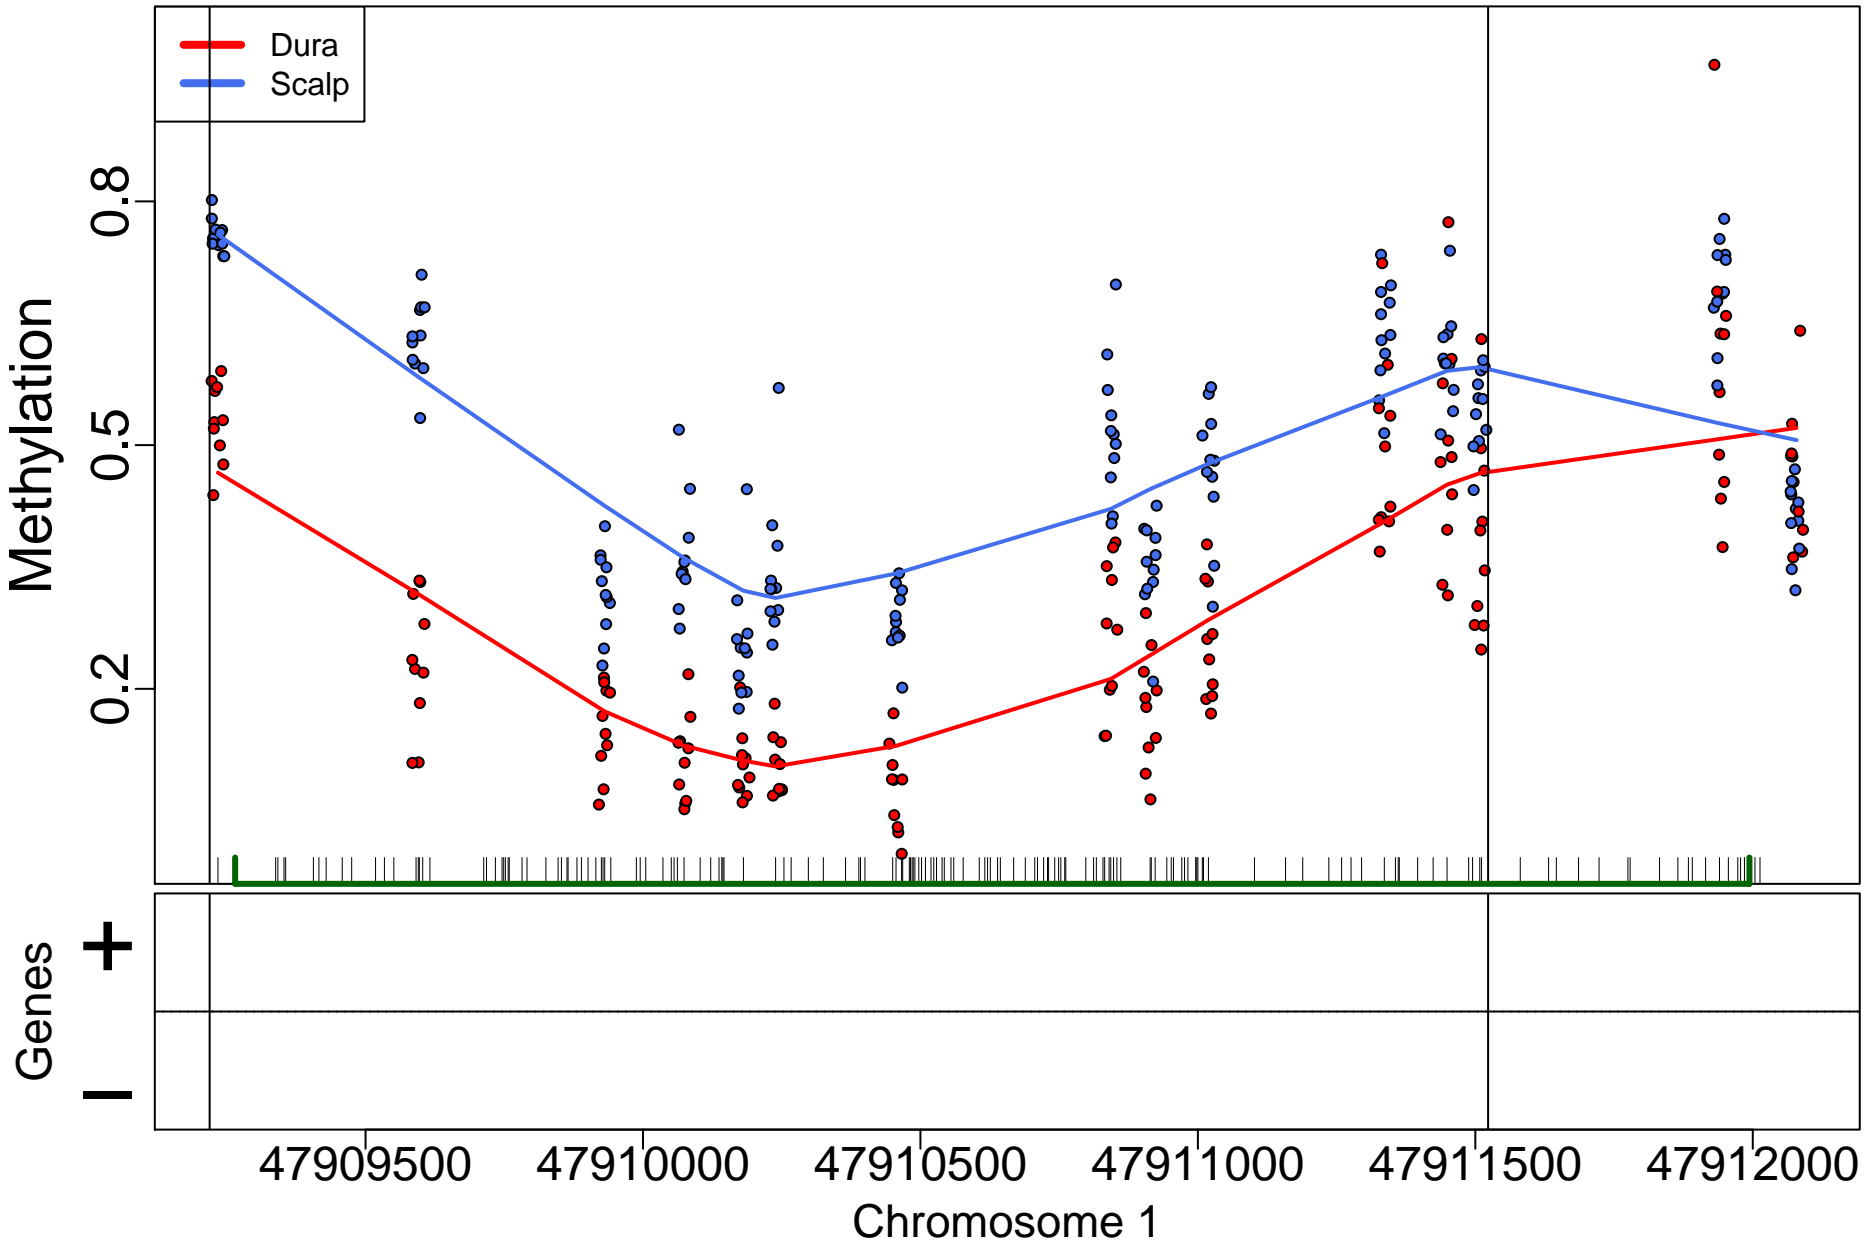

## CACNA1C; 13417bp from tss:inside exon

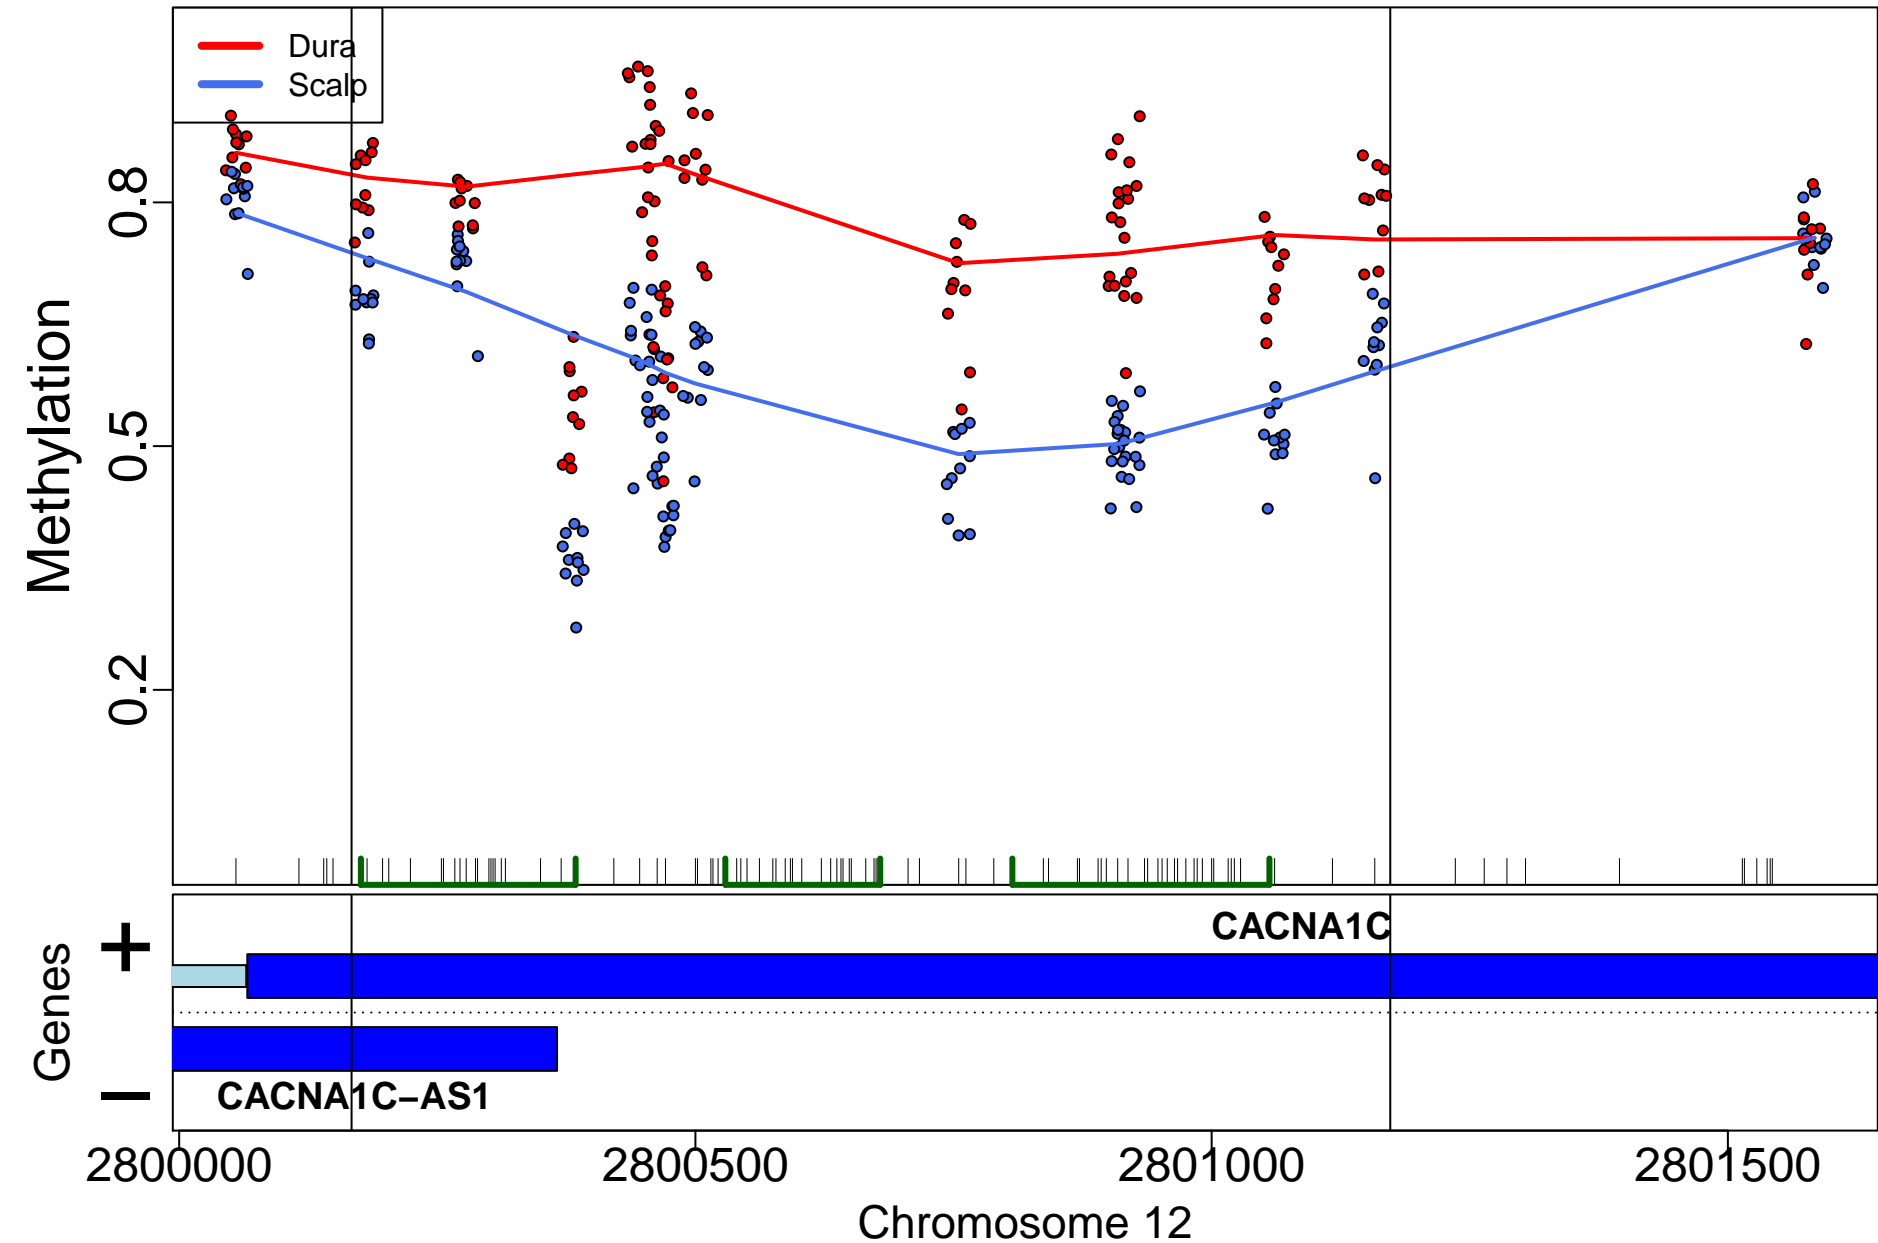

## DLX6-AS1; 0bp from tss:NA

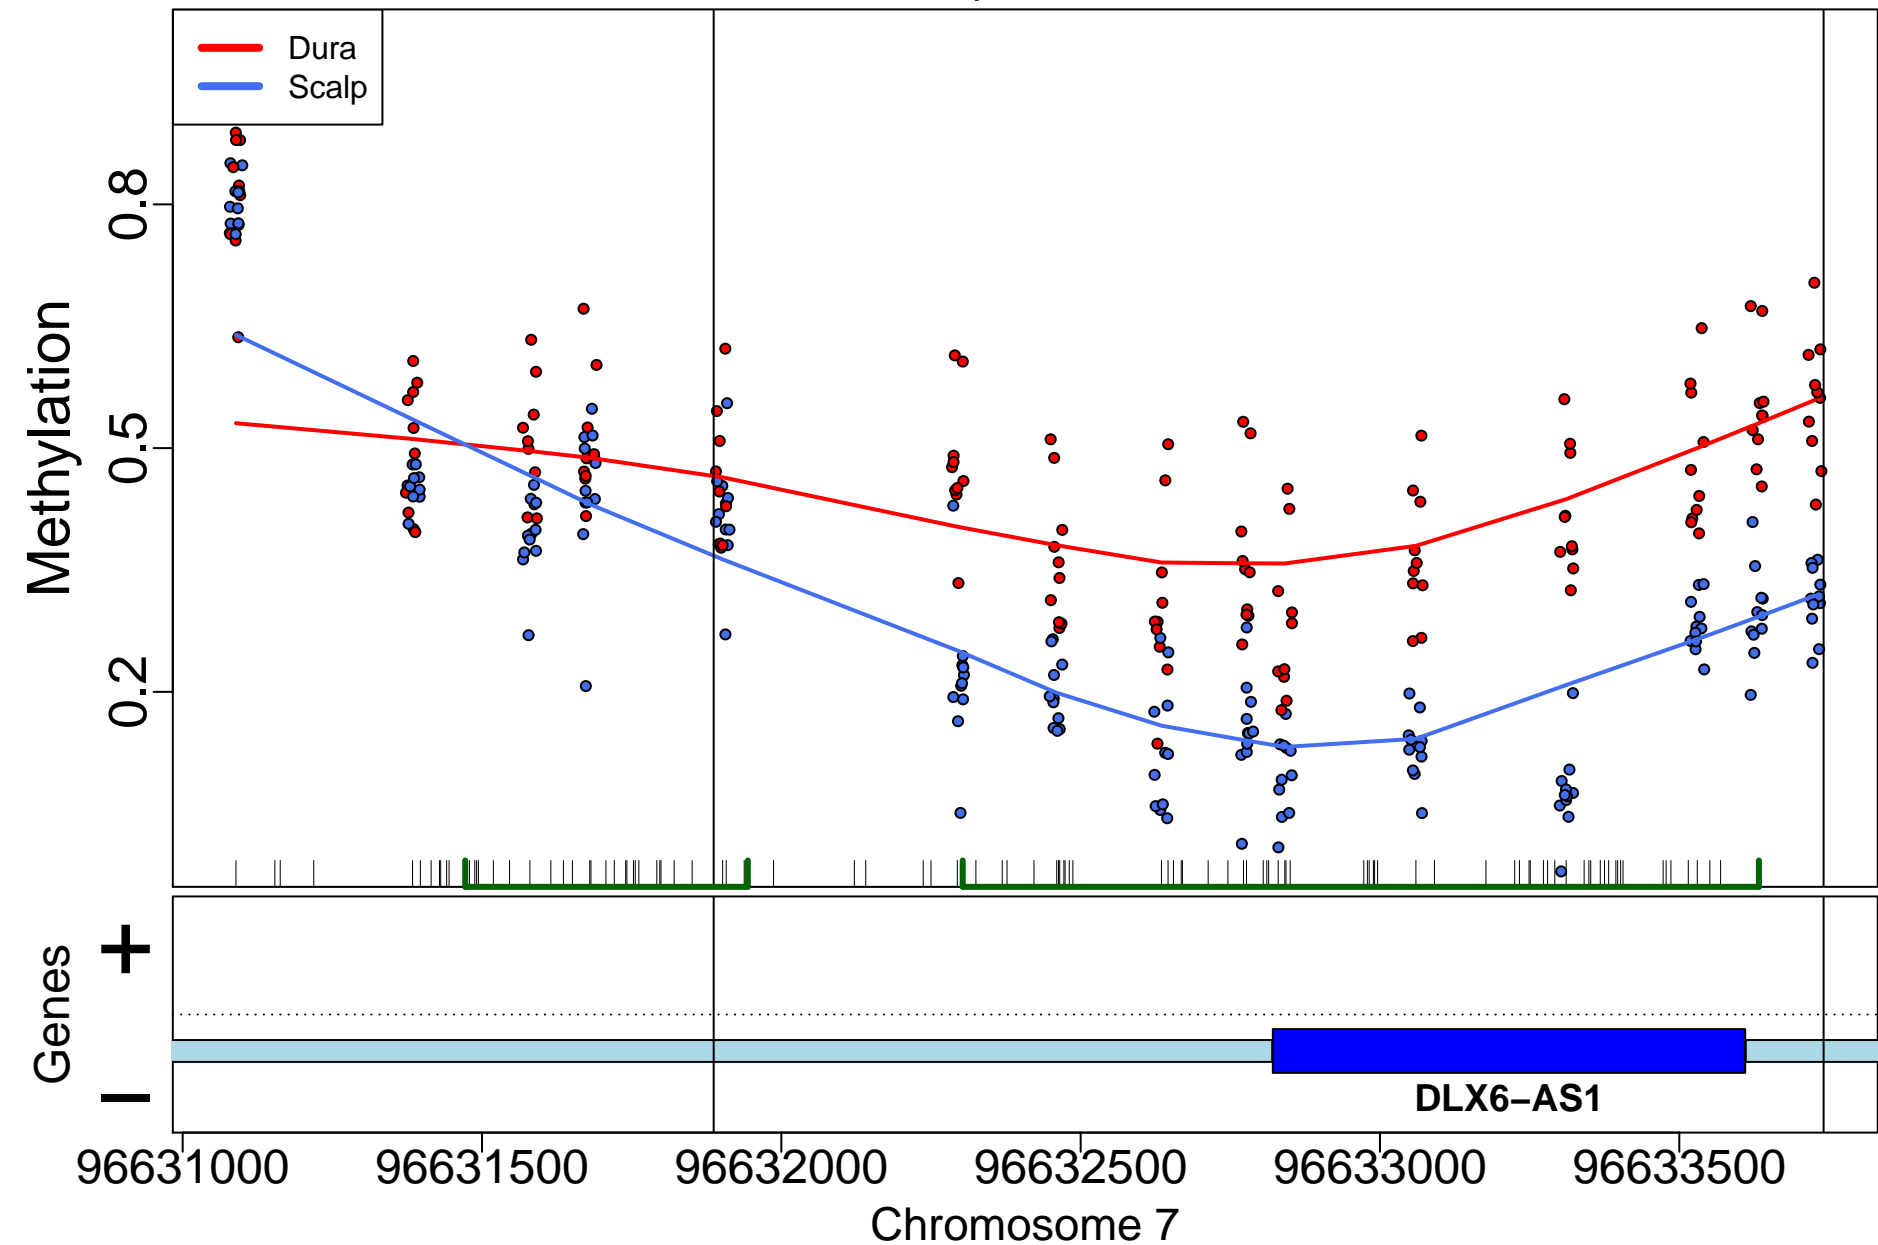

SORBS2; 317467bp from tss:inside intron

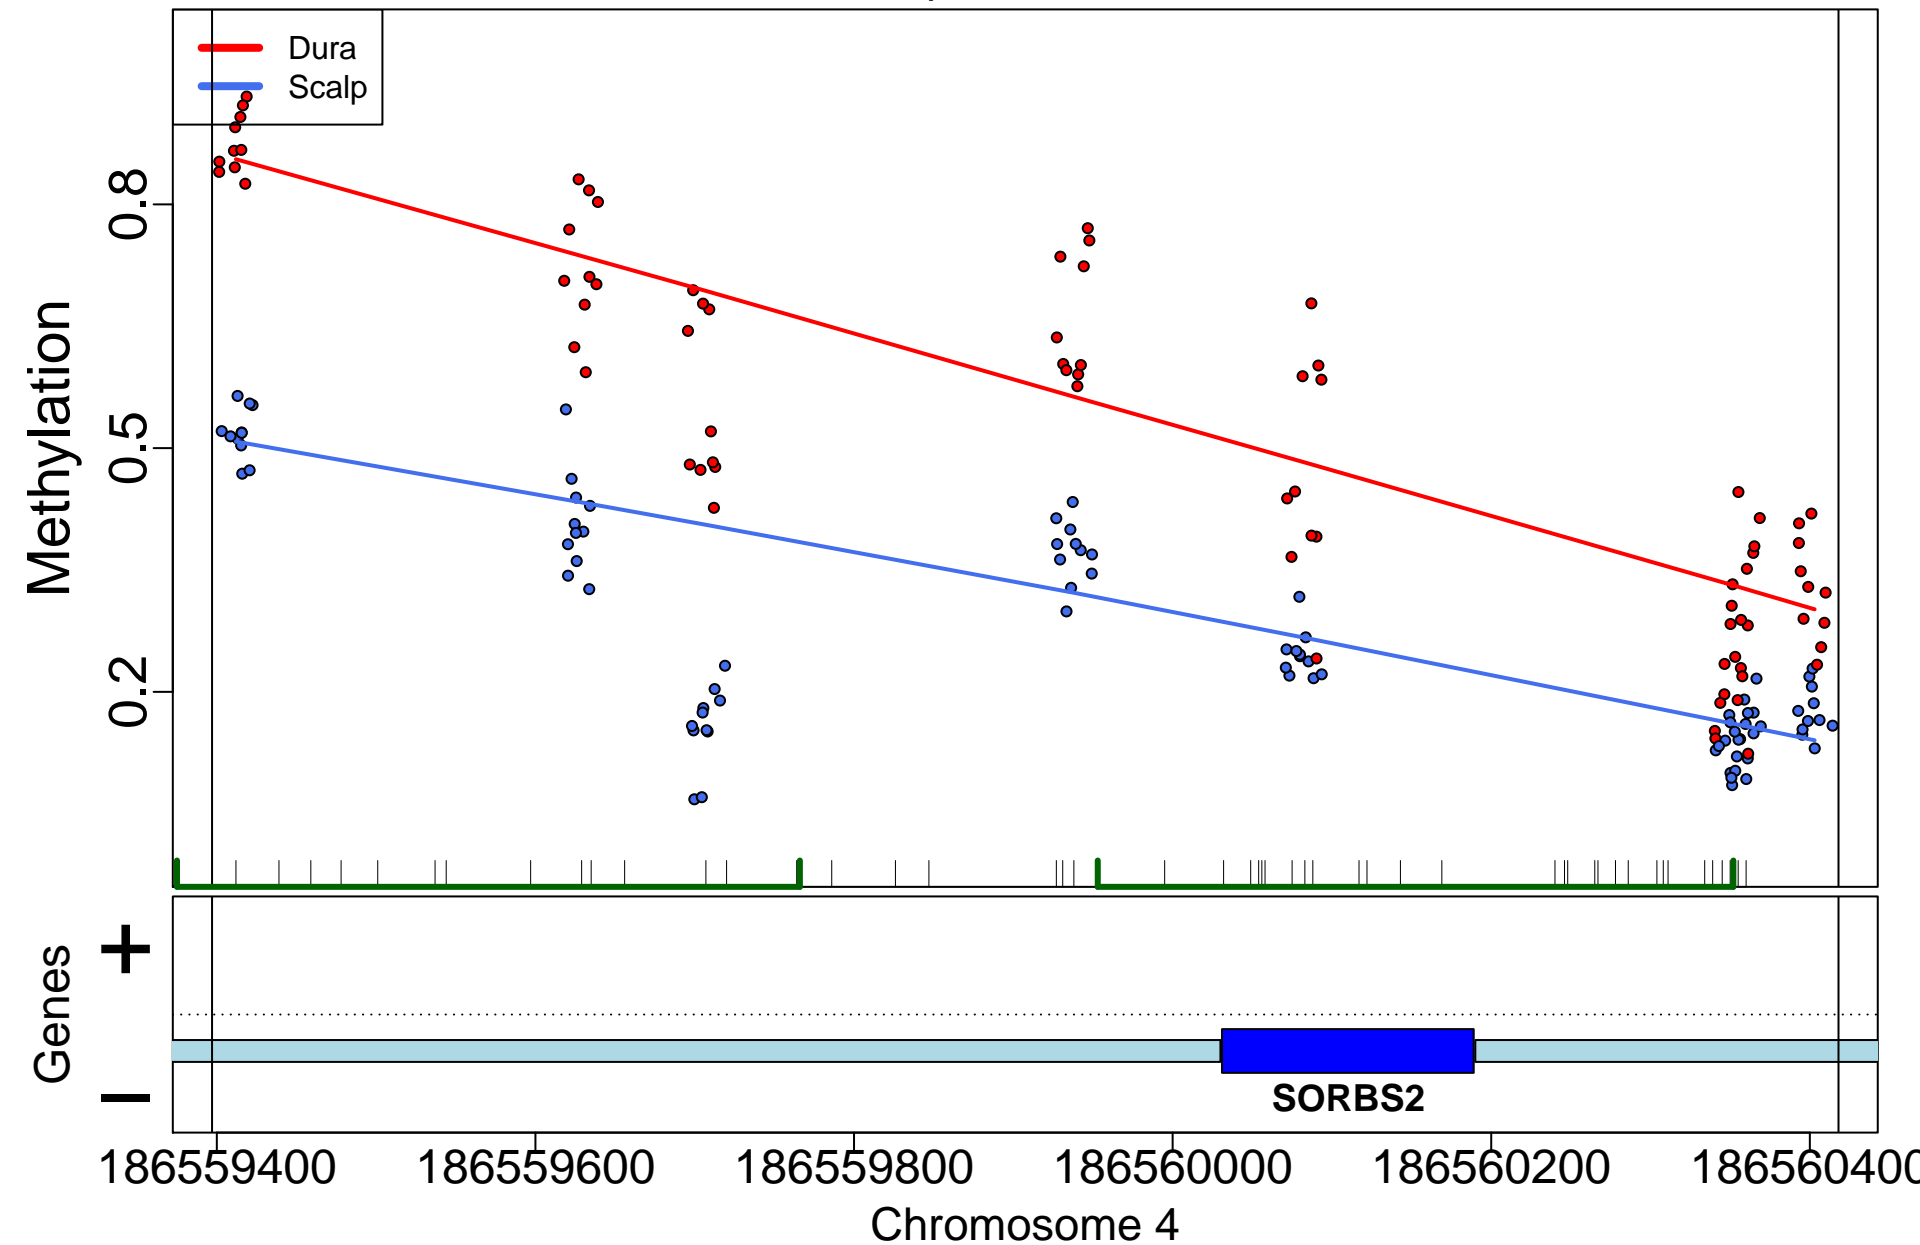

COMMD3-BMI1; 17147bp from tss:downstream

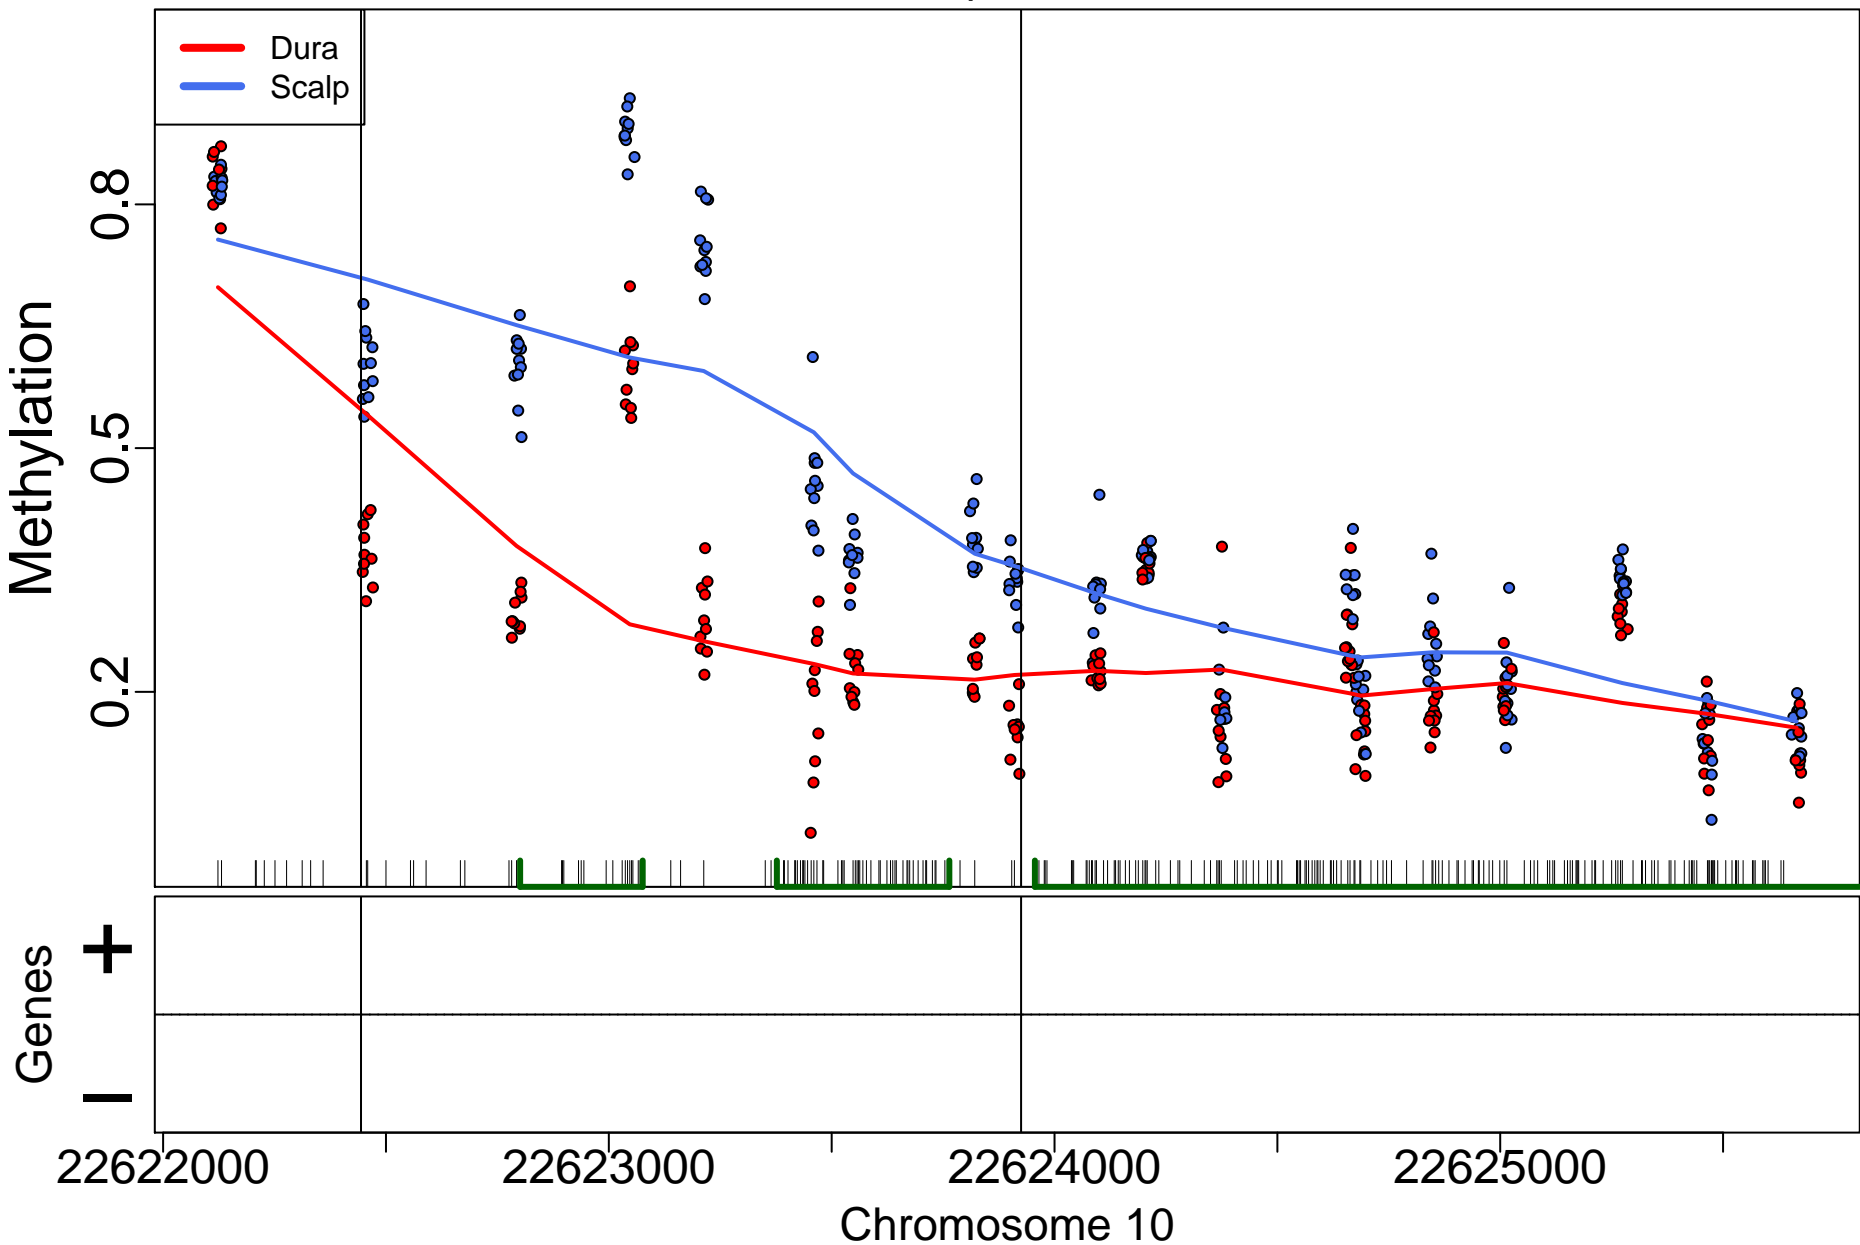

## SOX2-OT; 0bp from tss:NA

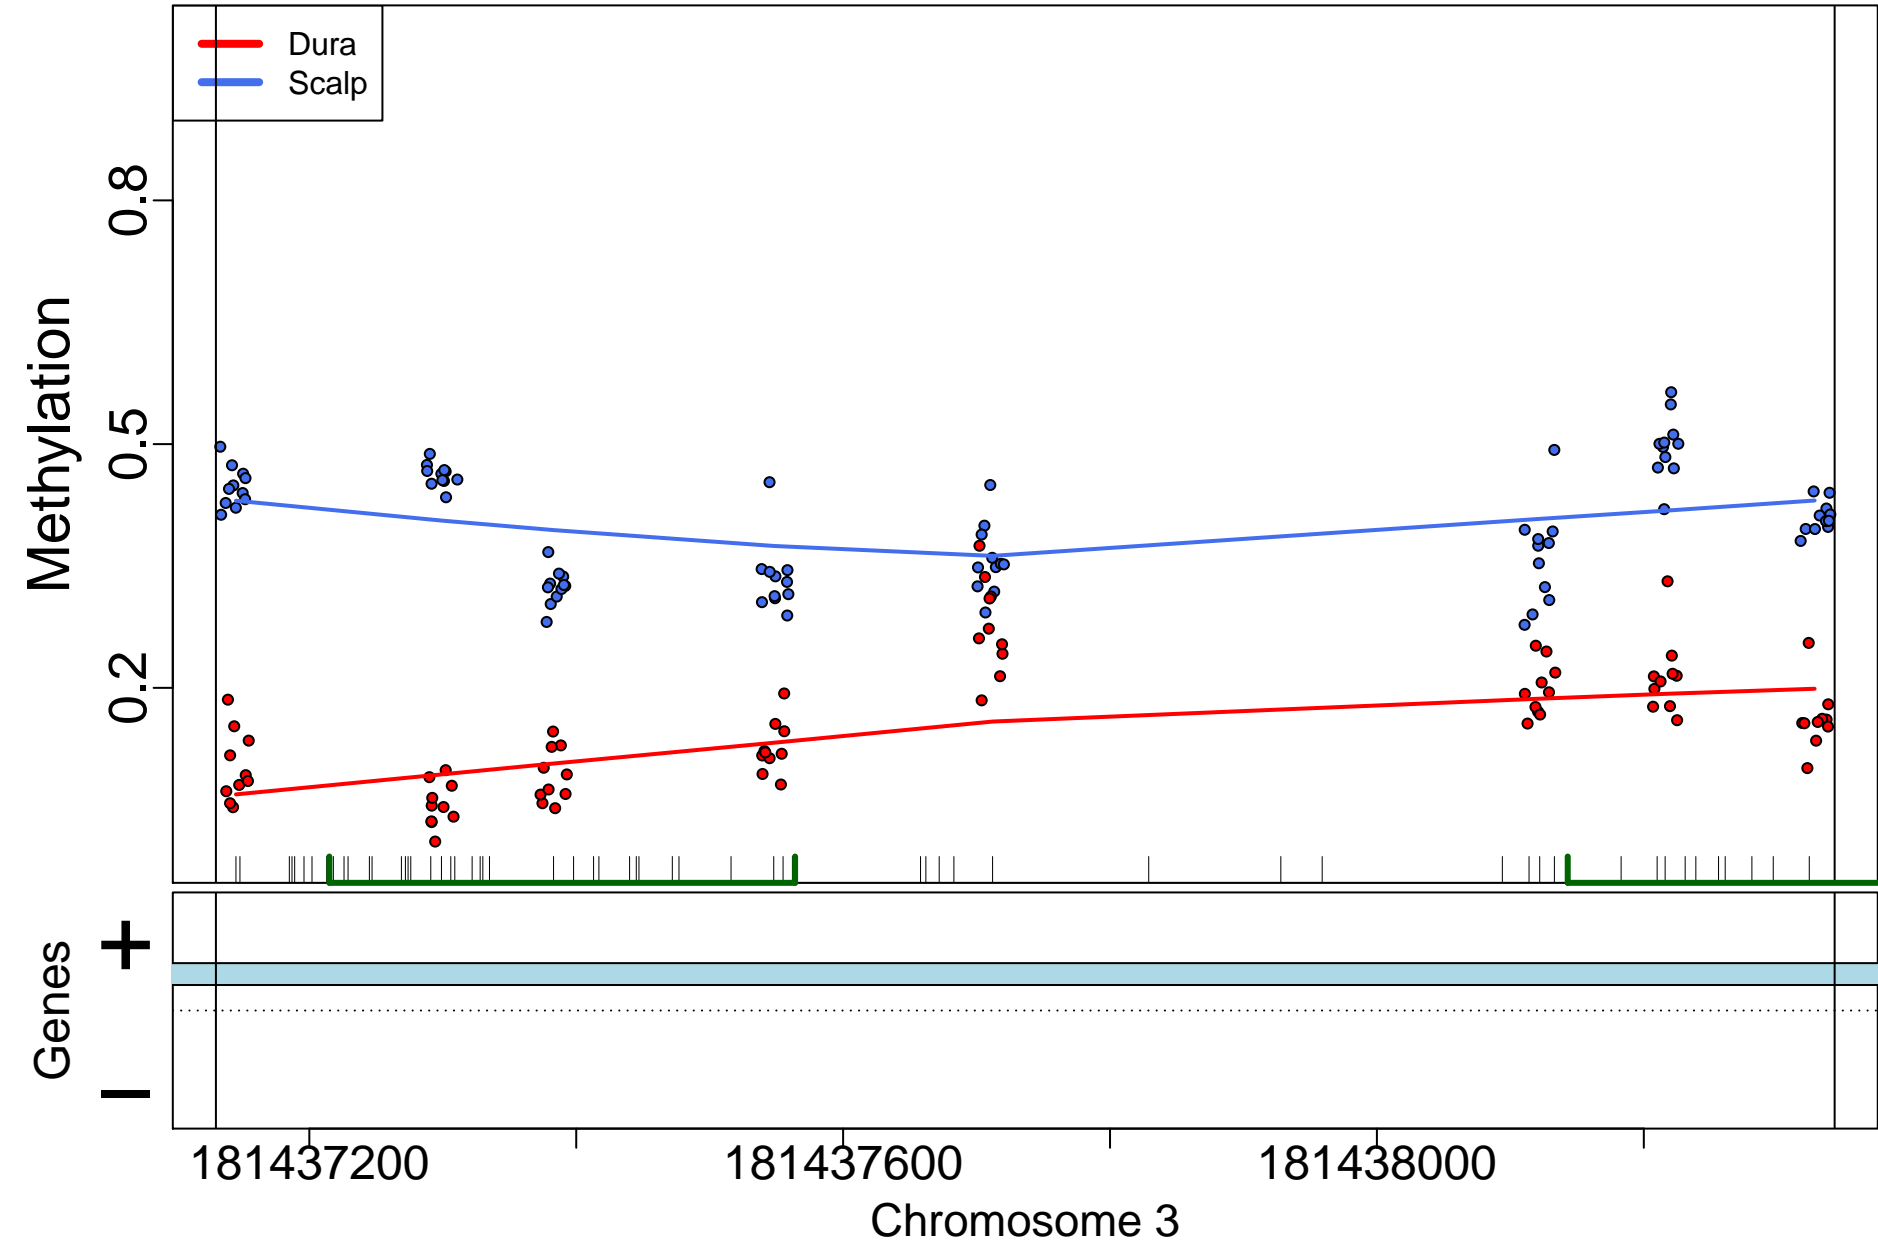

IRX1; 9615bp from tss:downstream

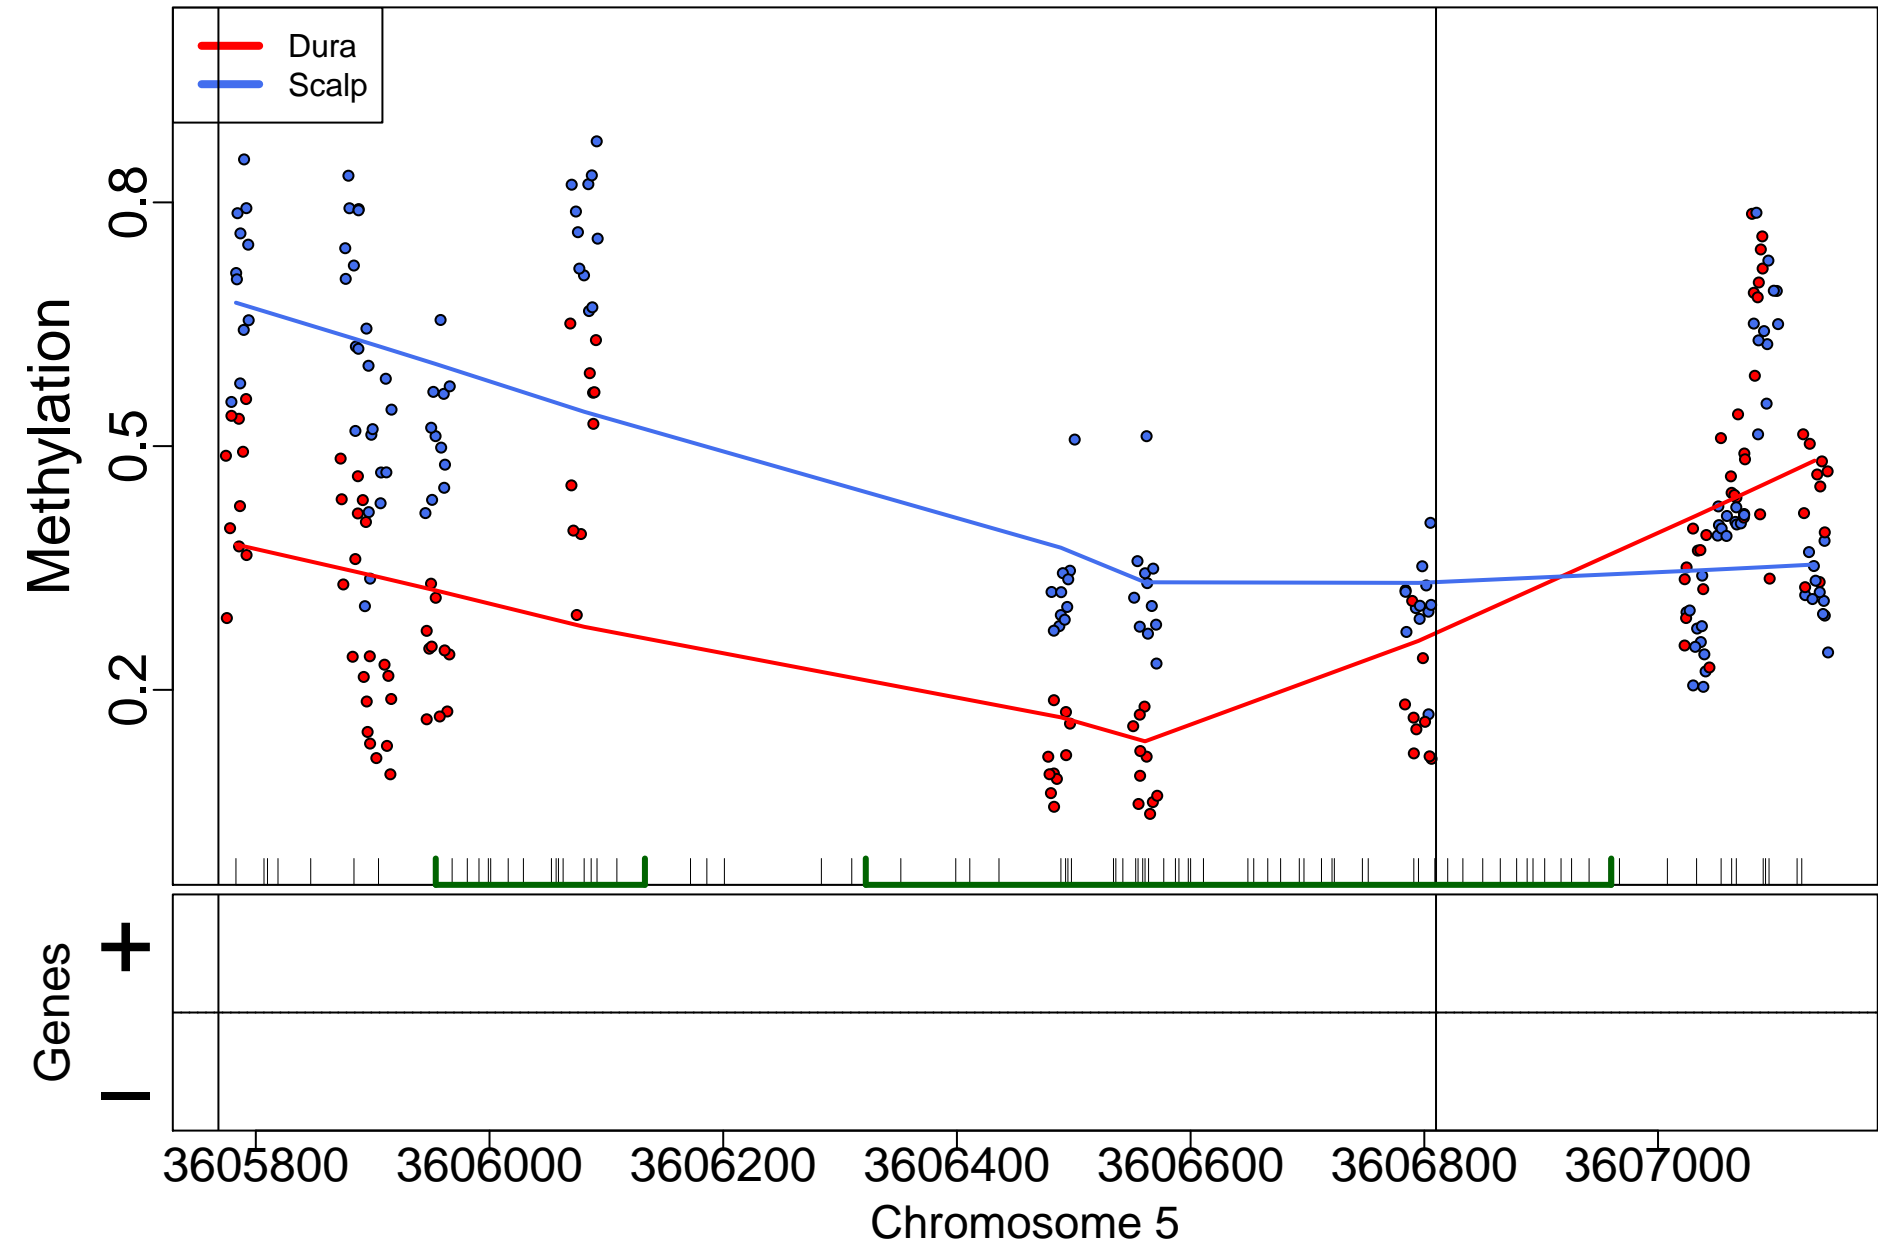

TBX15; 5023bp from tss:inside intron

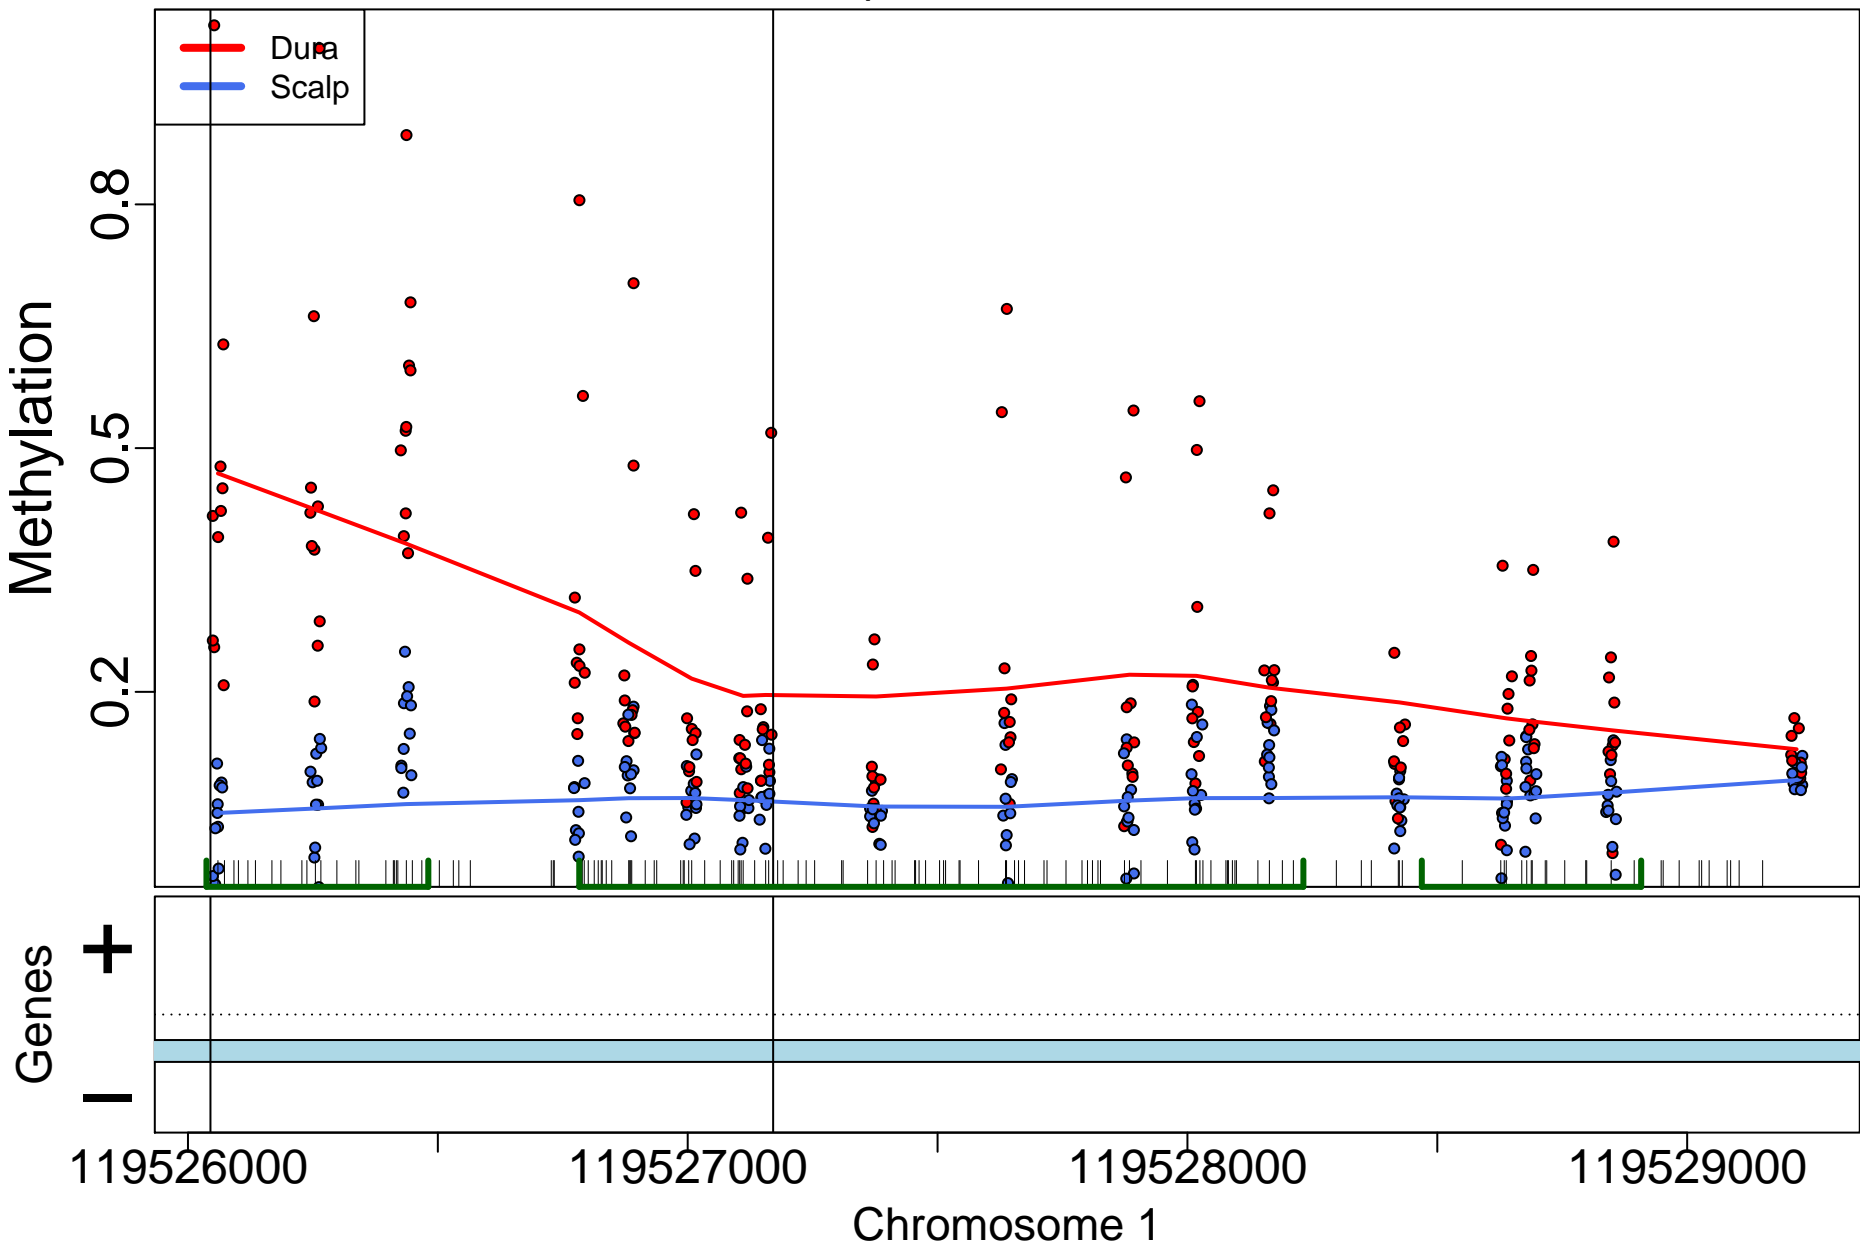



# AHRR; 45692bp from tss:inside intron

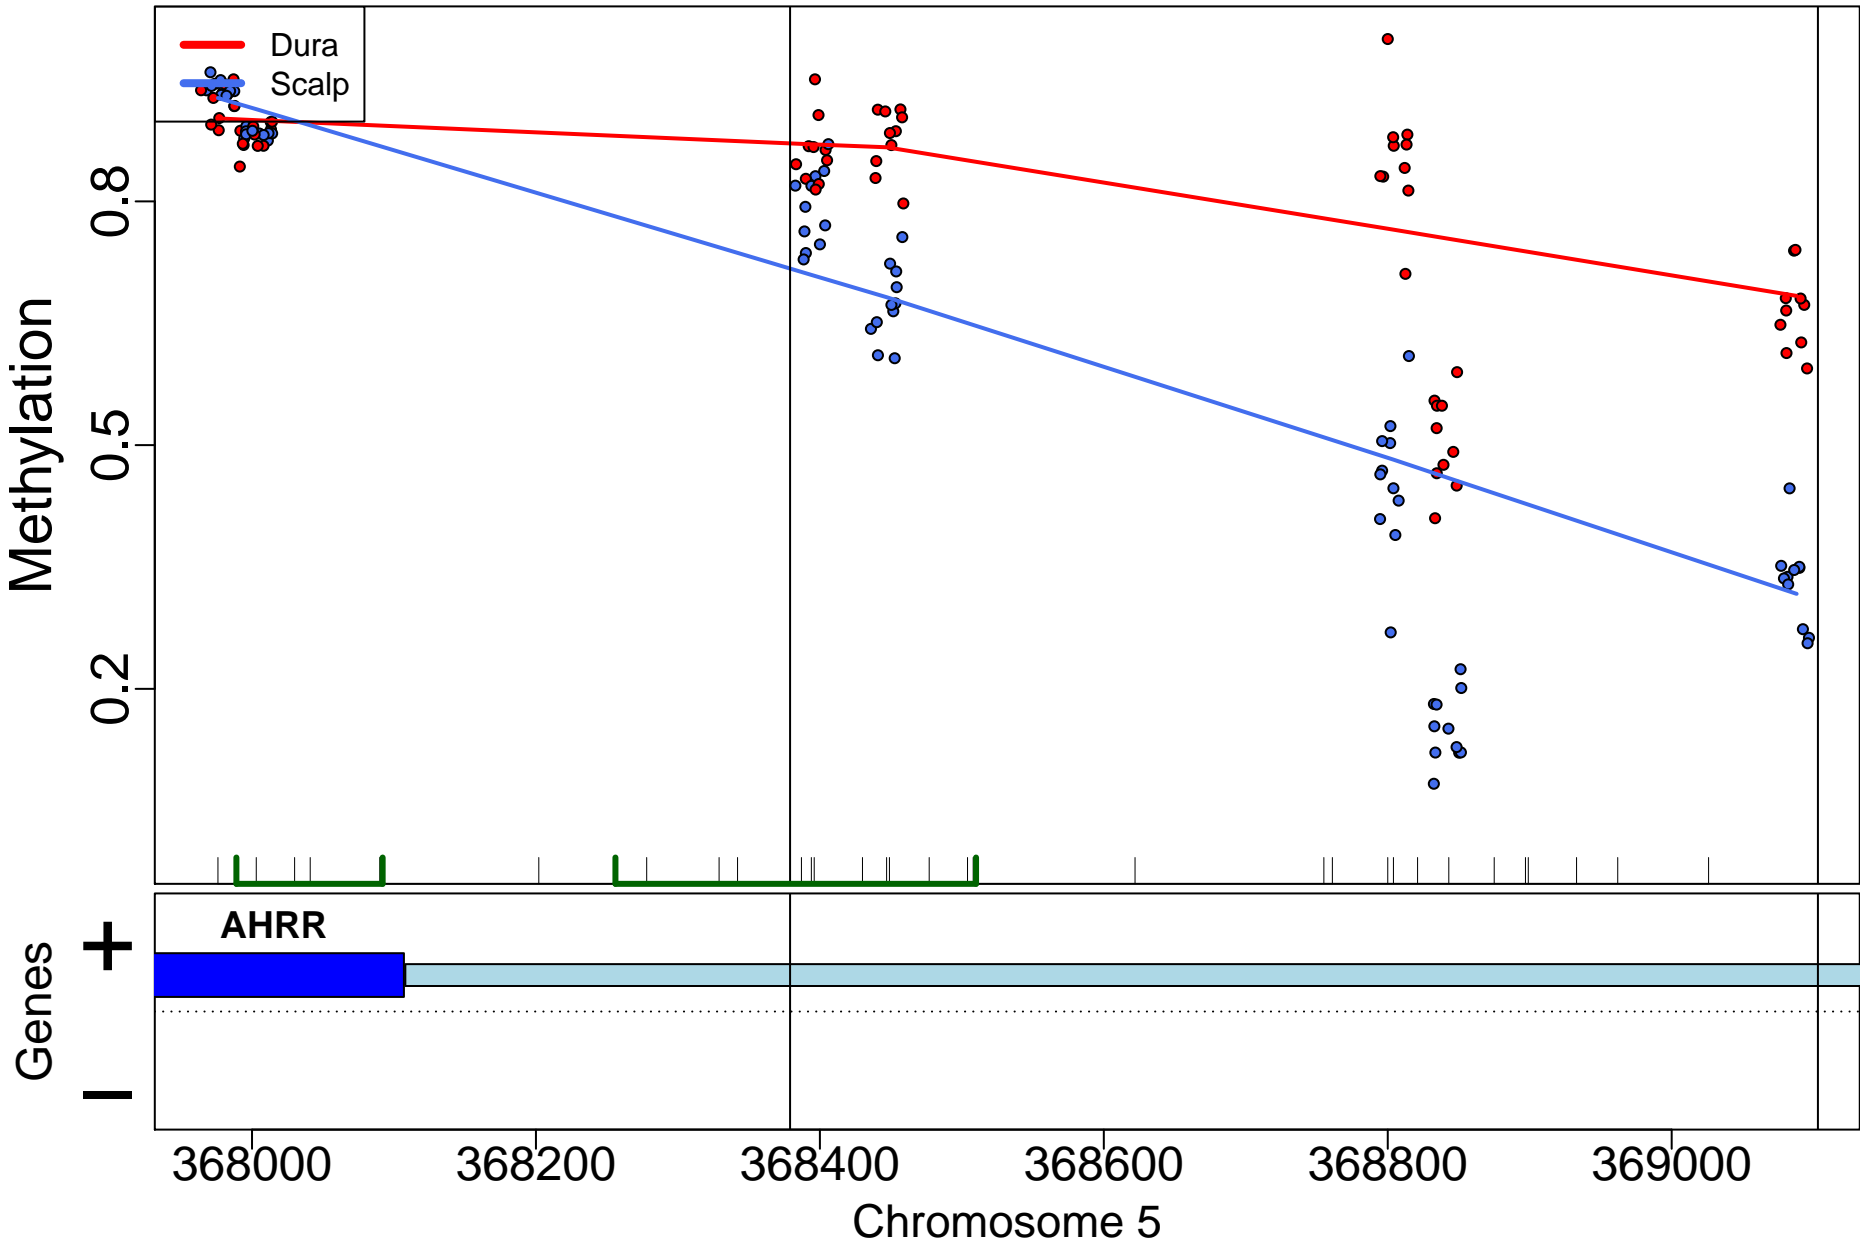

# B4GALNT3; 4124bp from tss:inside intron

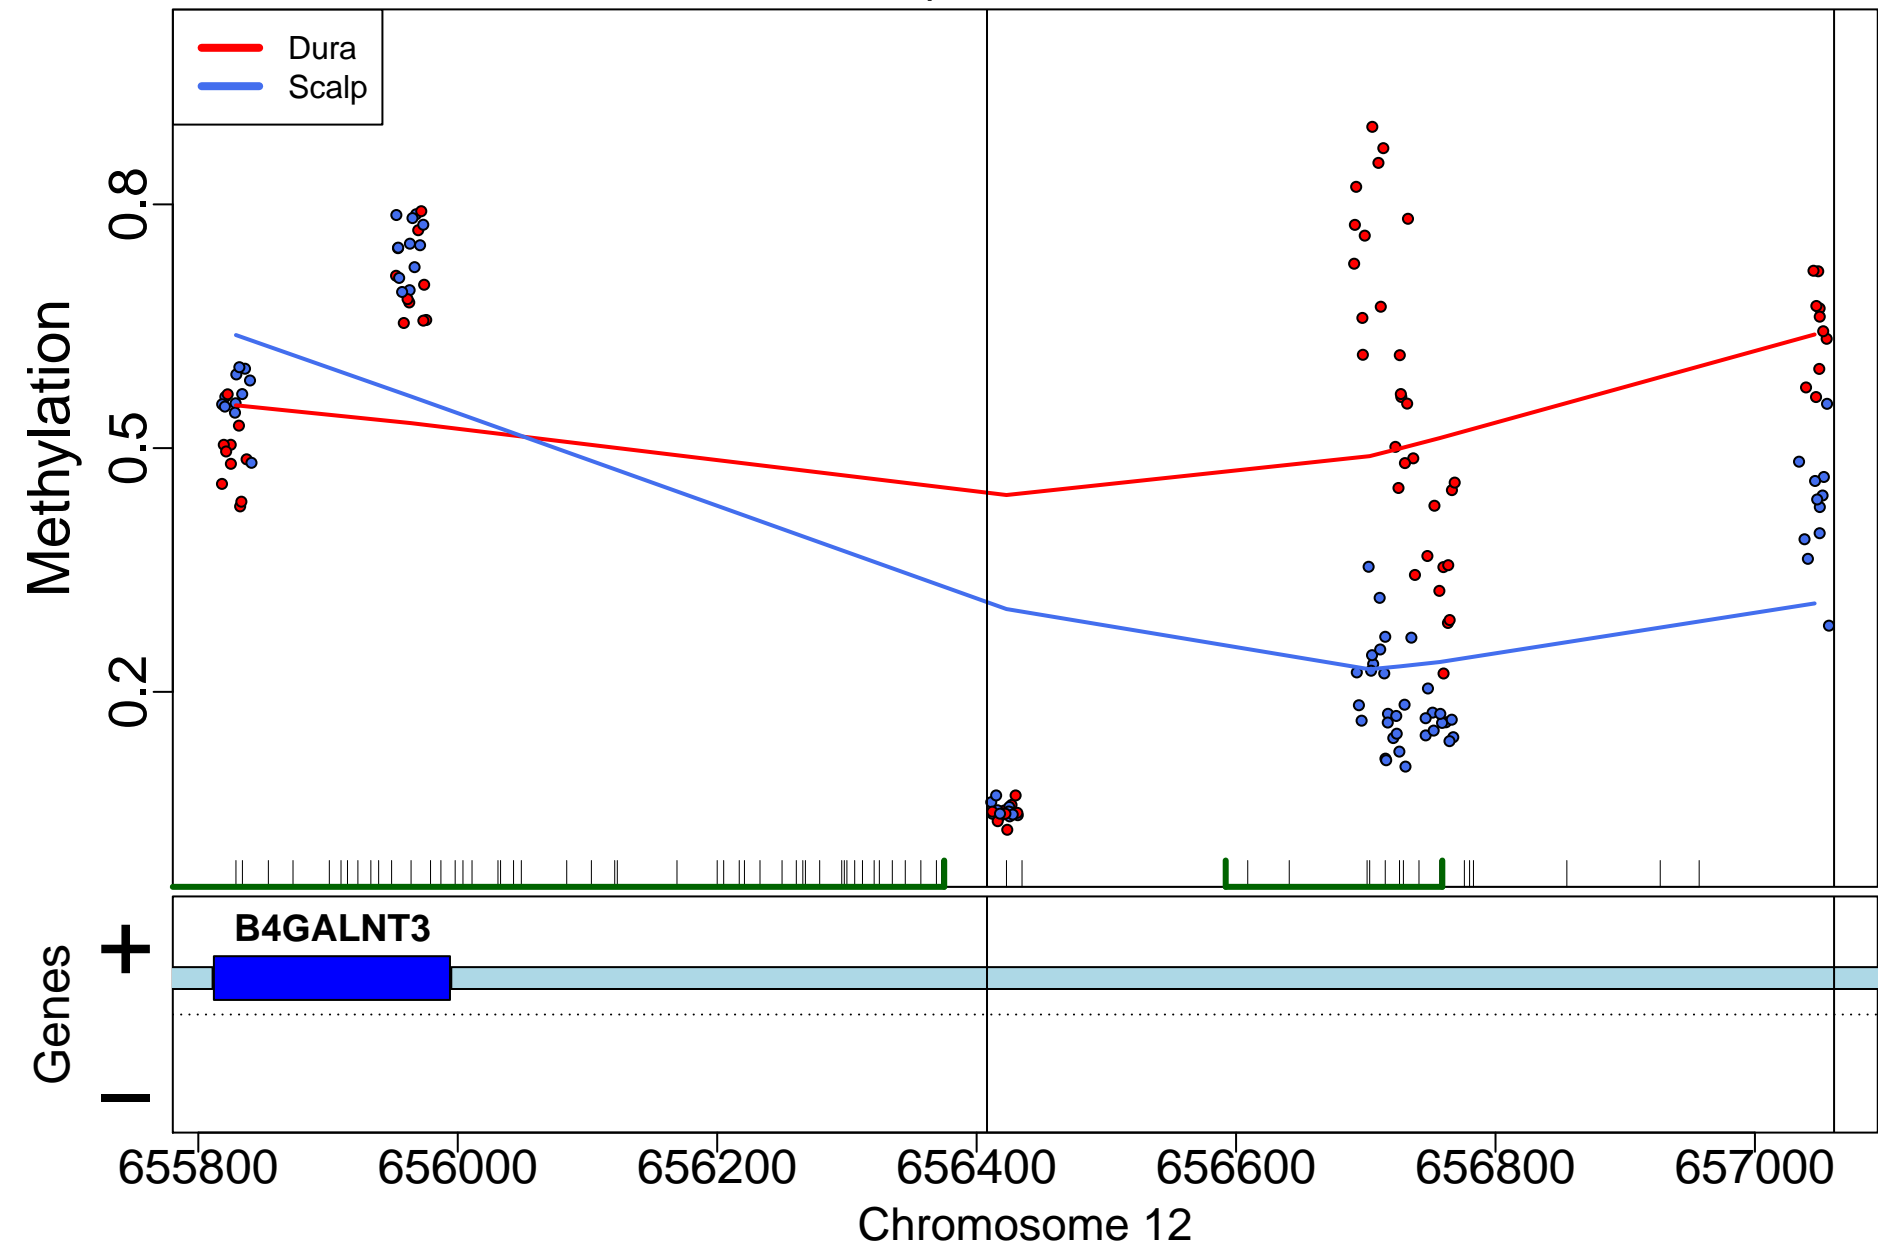

# AHRR; 33bp from tss:overlaps exon downstream

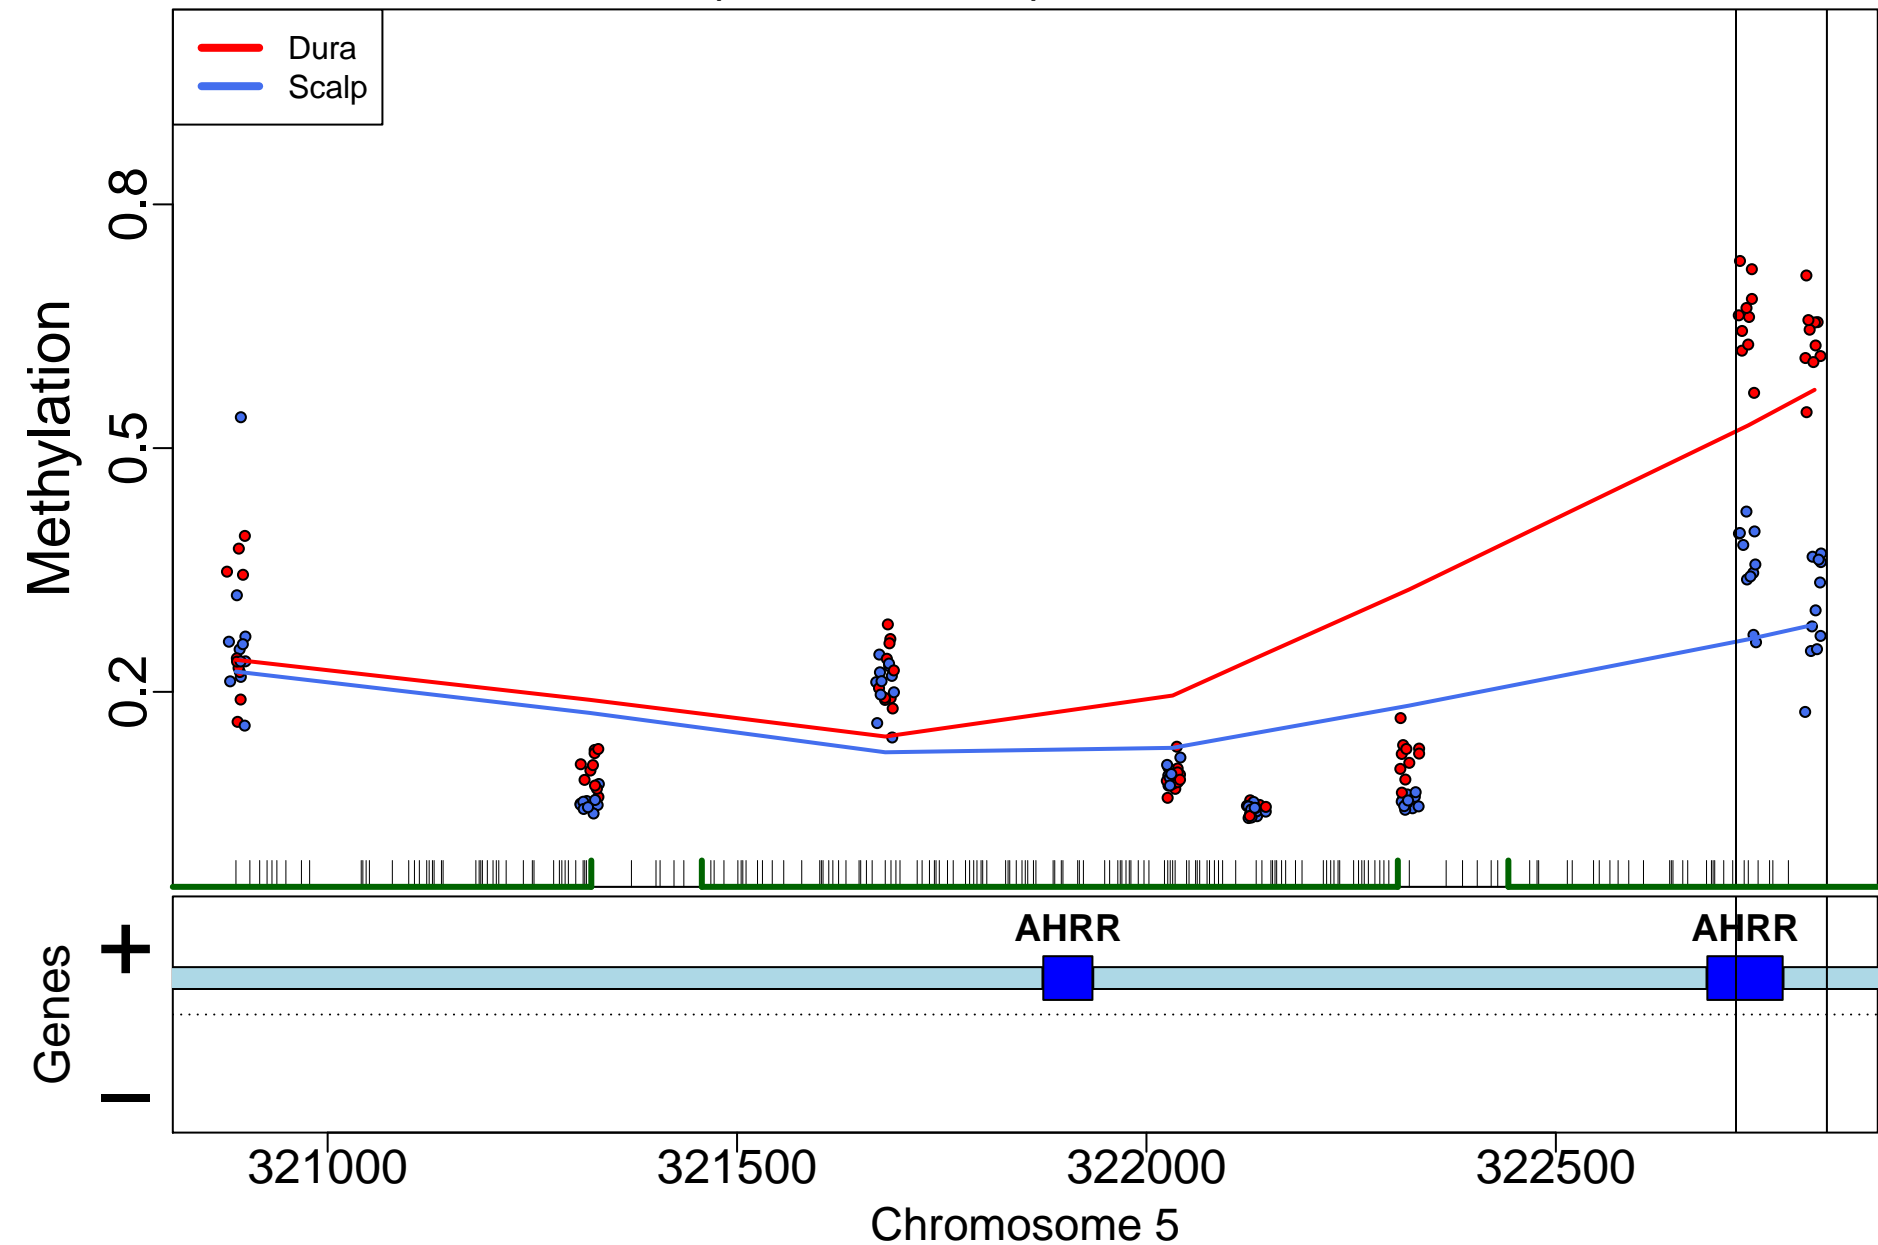

ARHGAP20; 2458bp from tss:inside intron

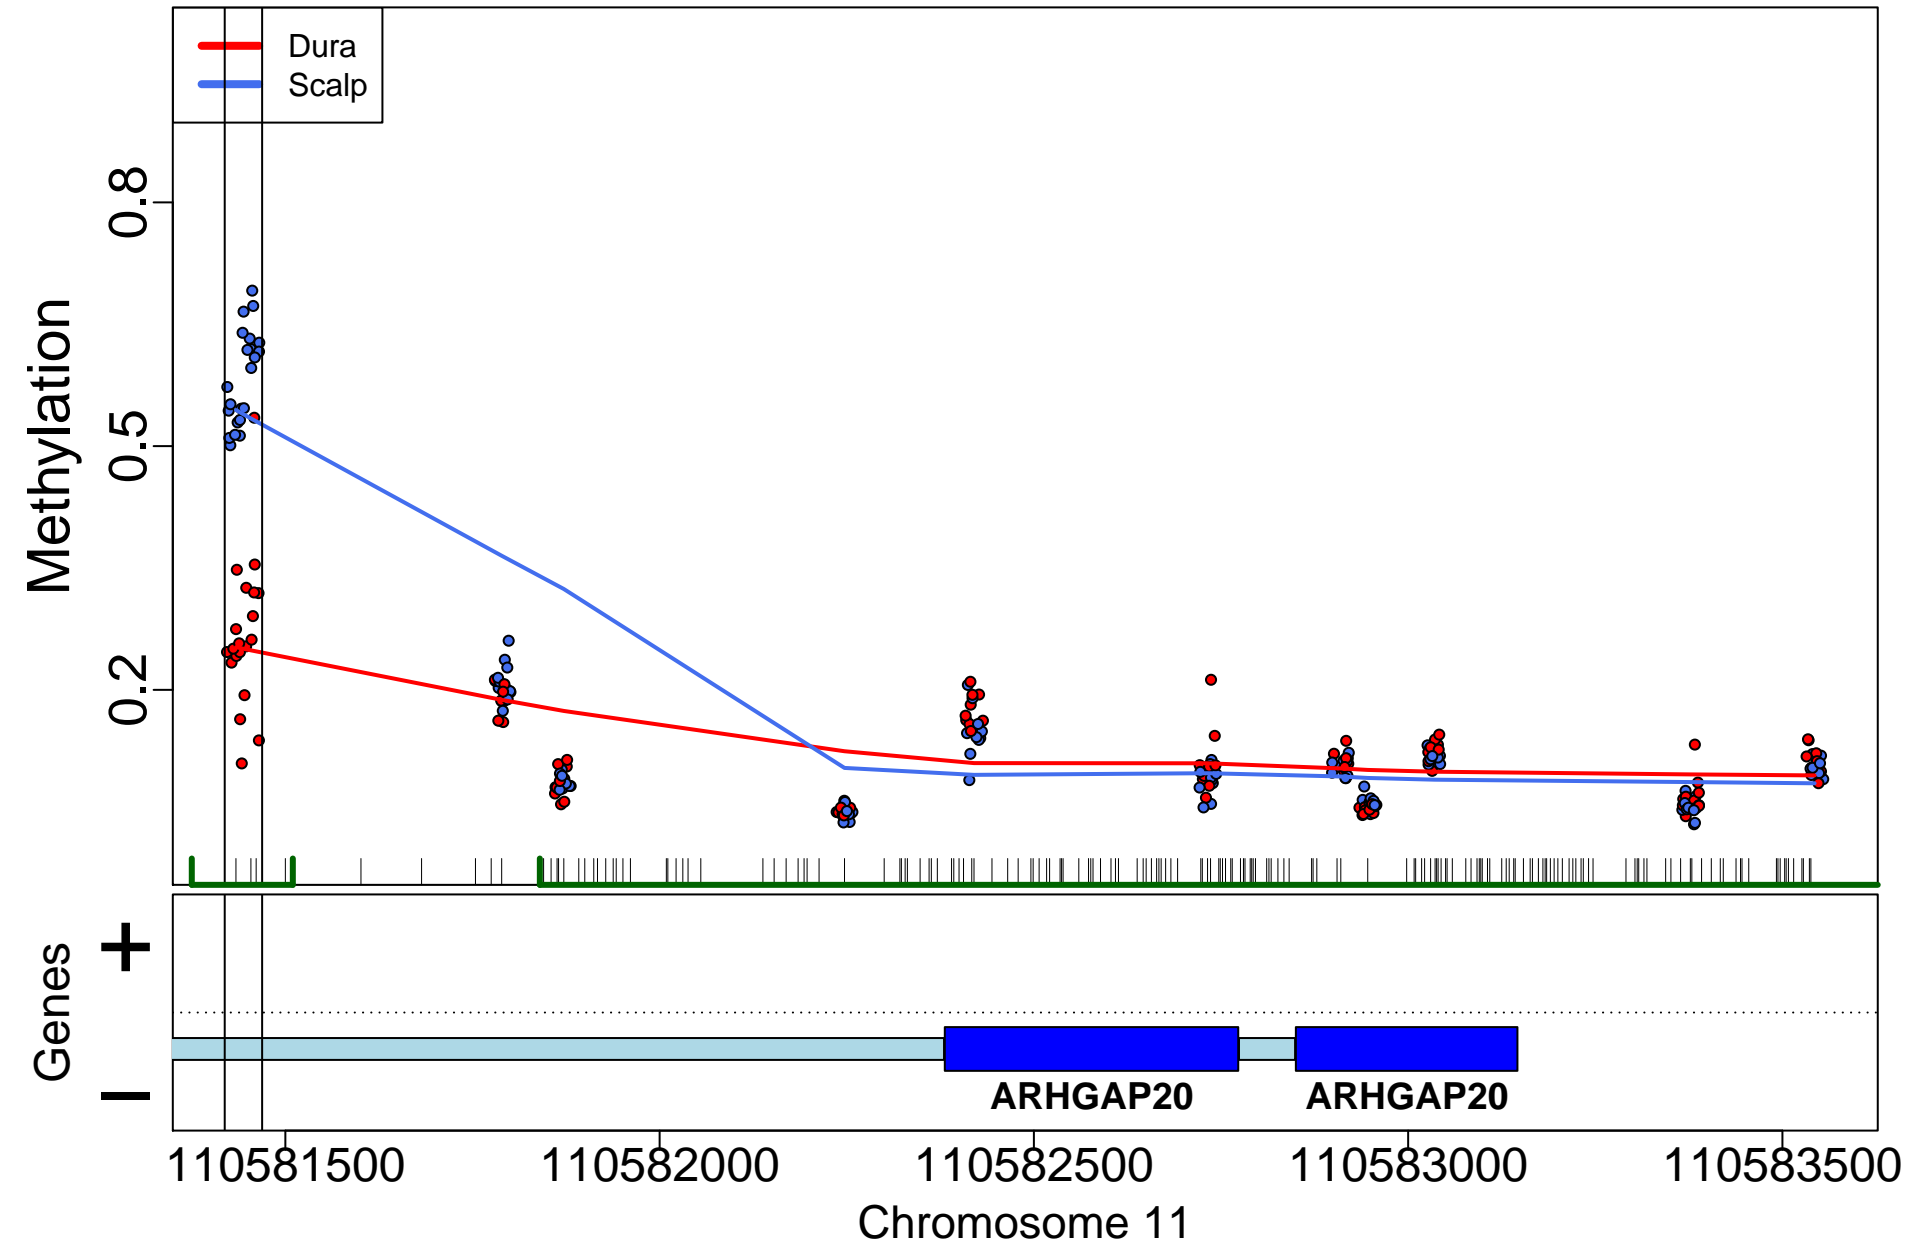

MIR4470; 0bp from tss:NA

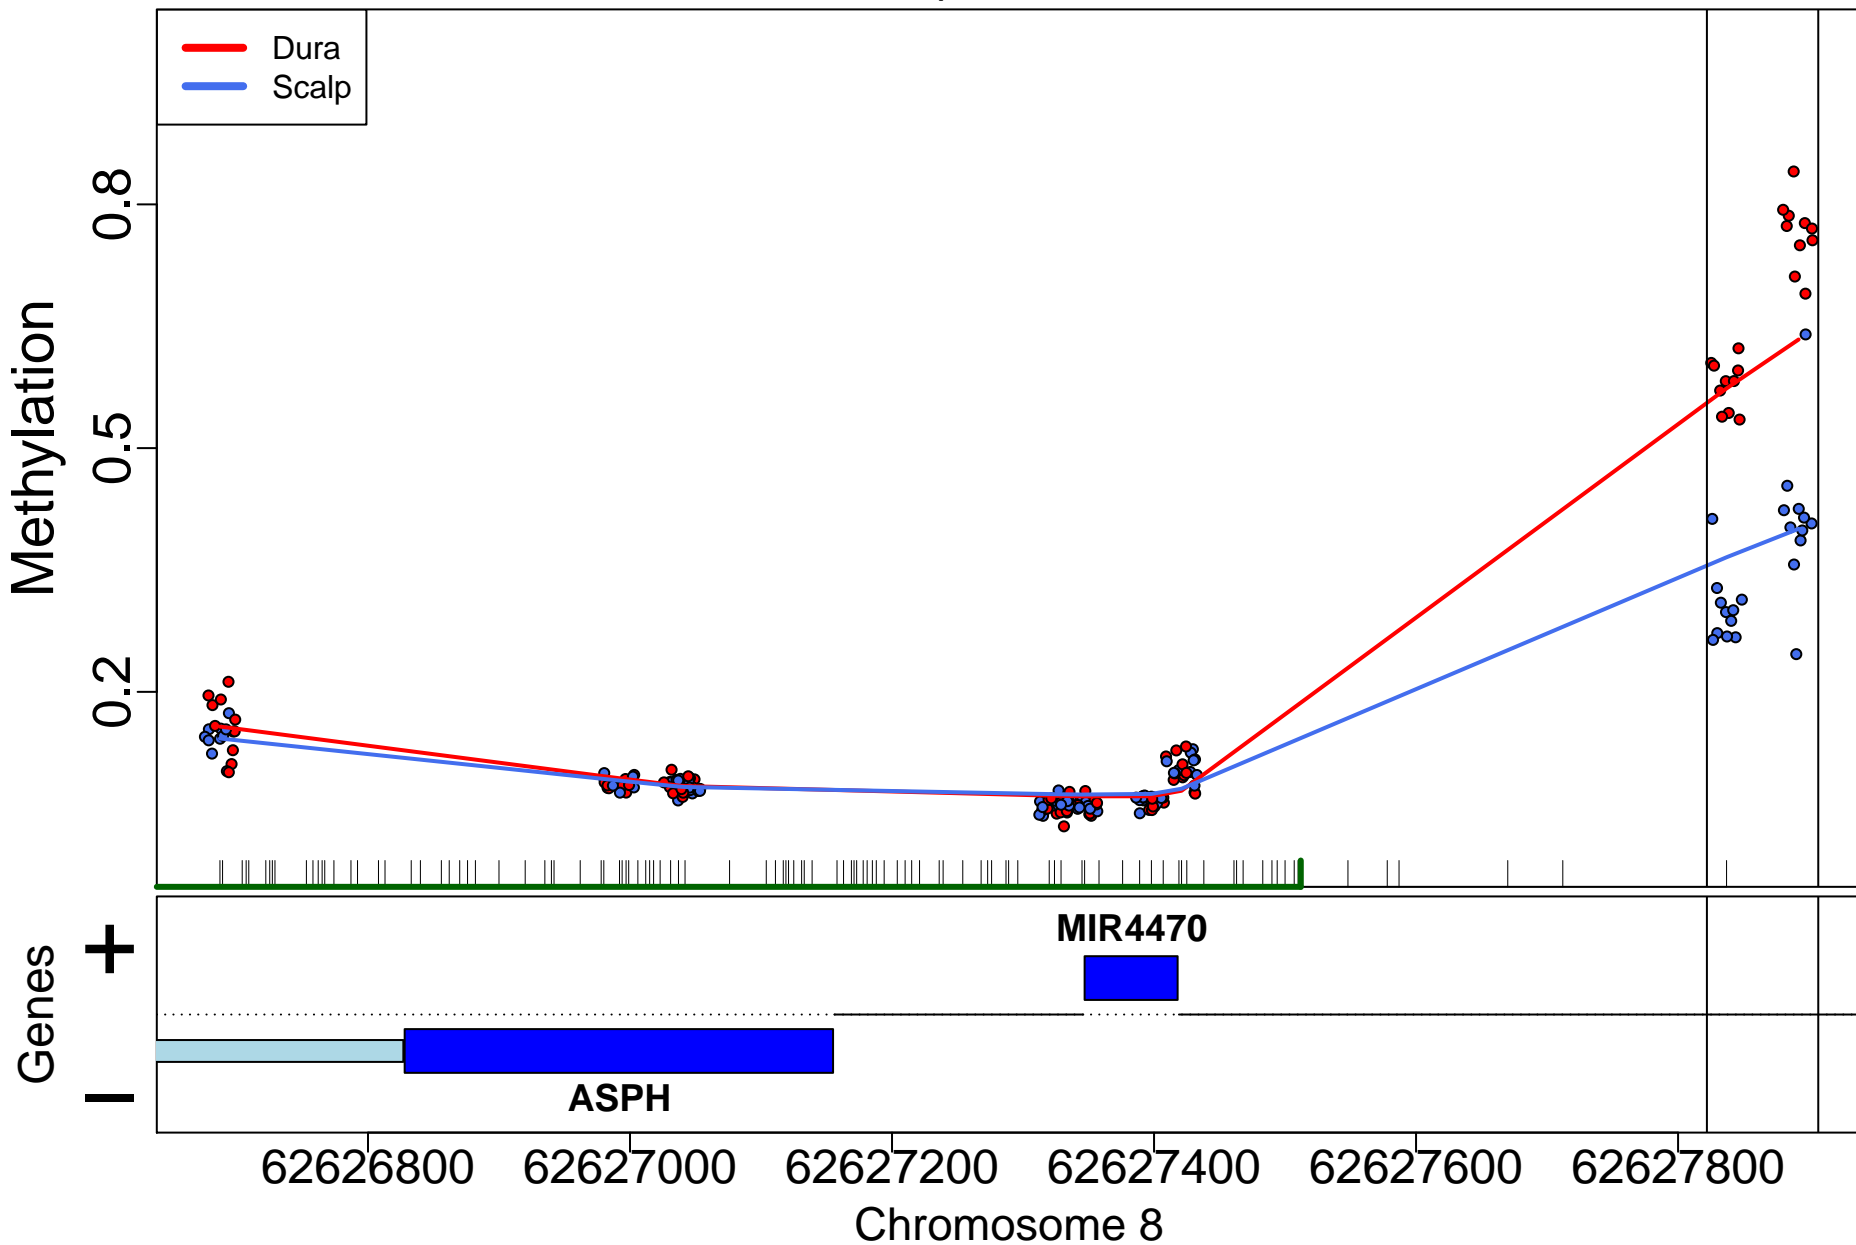

MYOT; 201803bp from tss:downstream

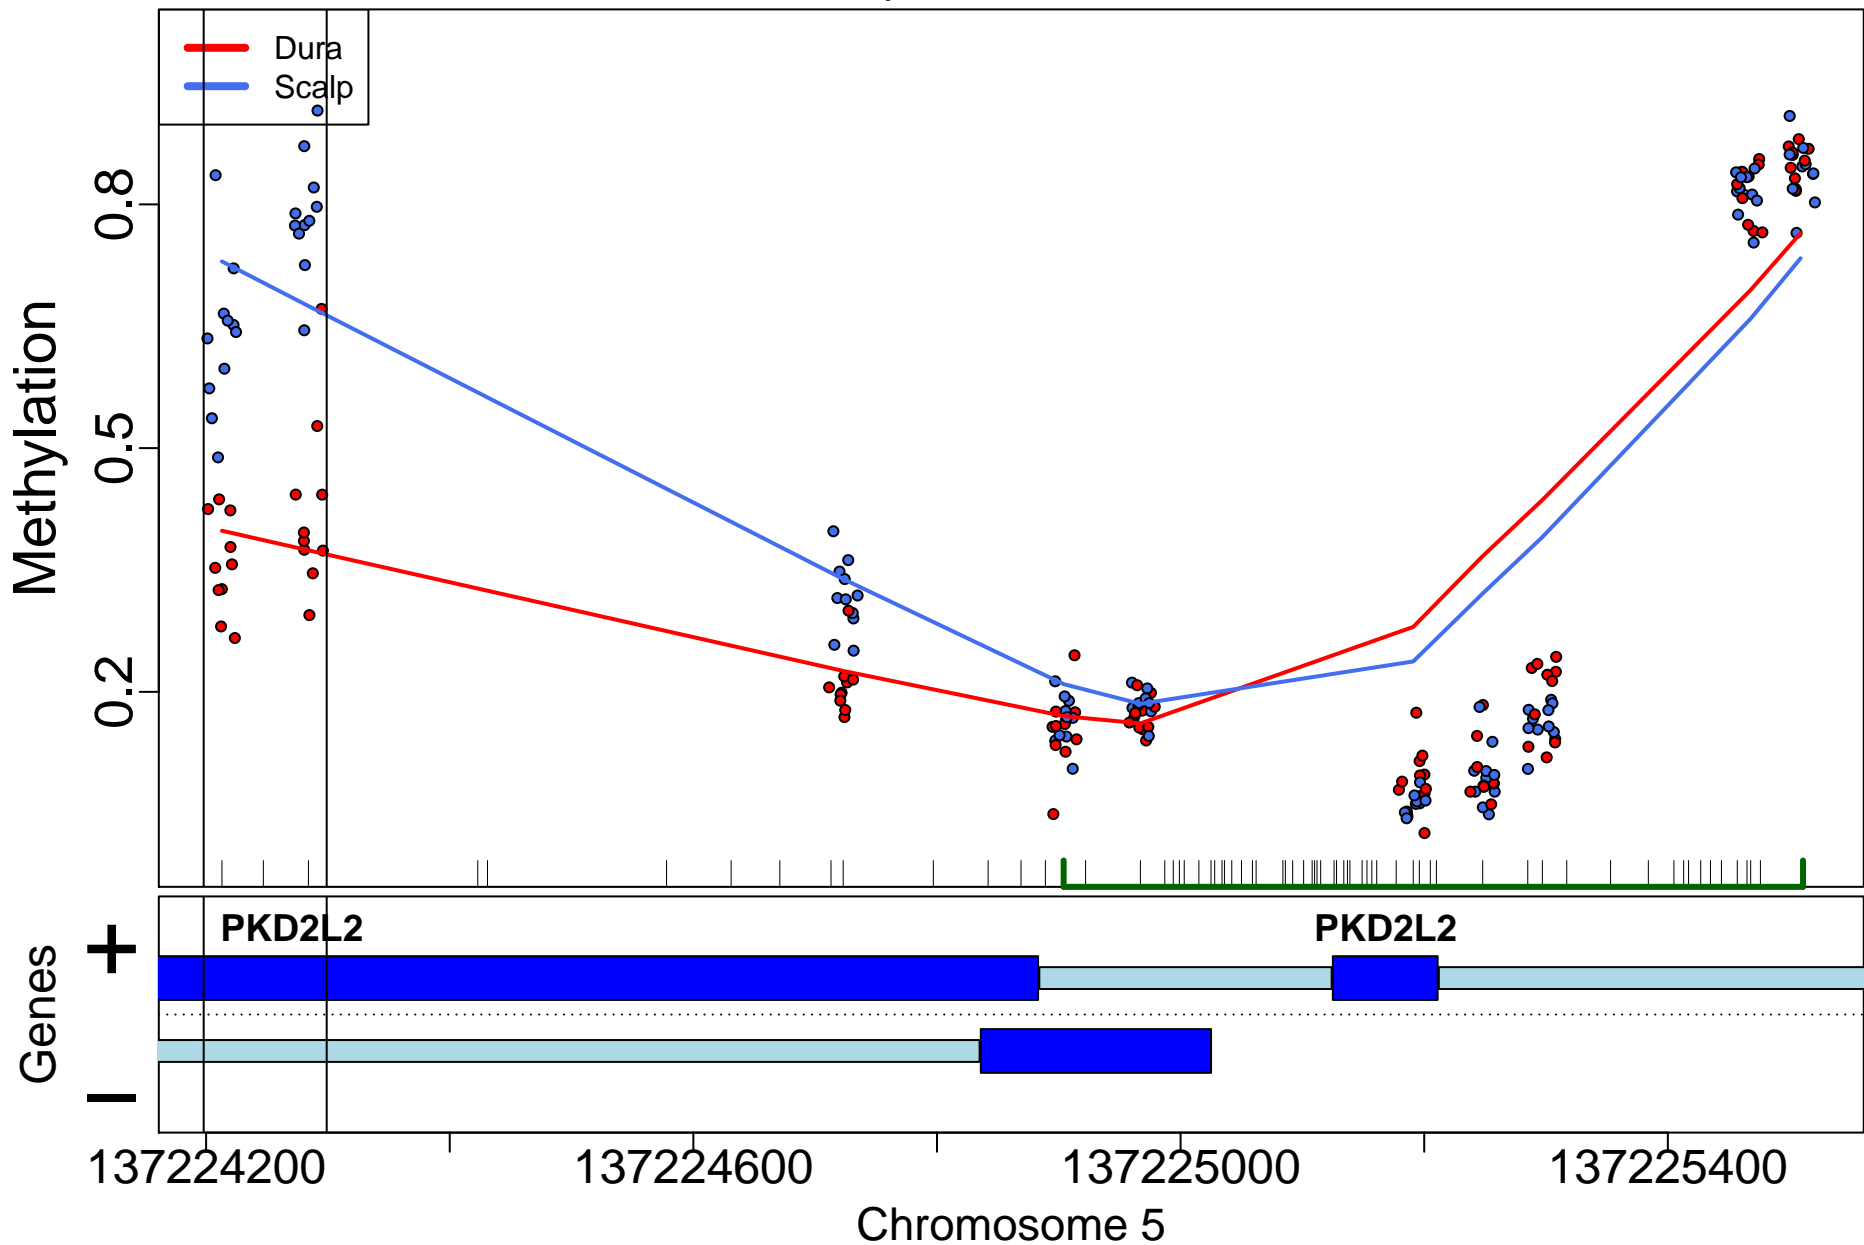

ZIC1; 12937bp from tss:downstream

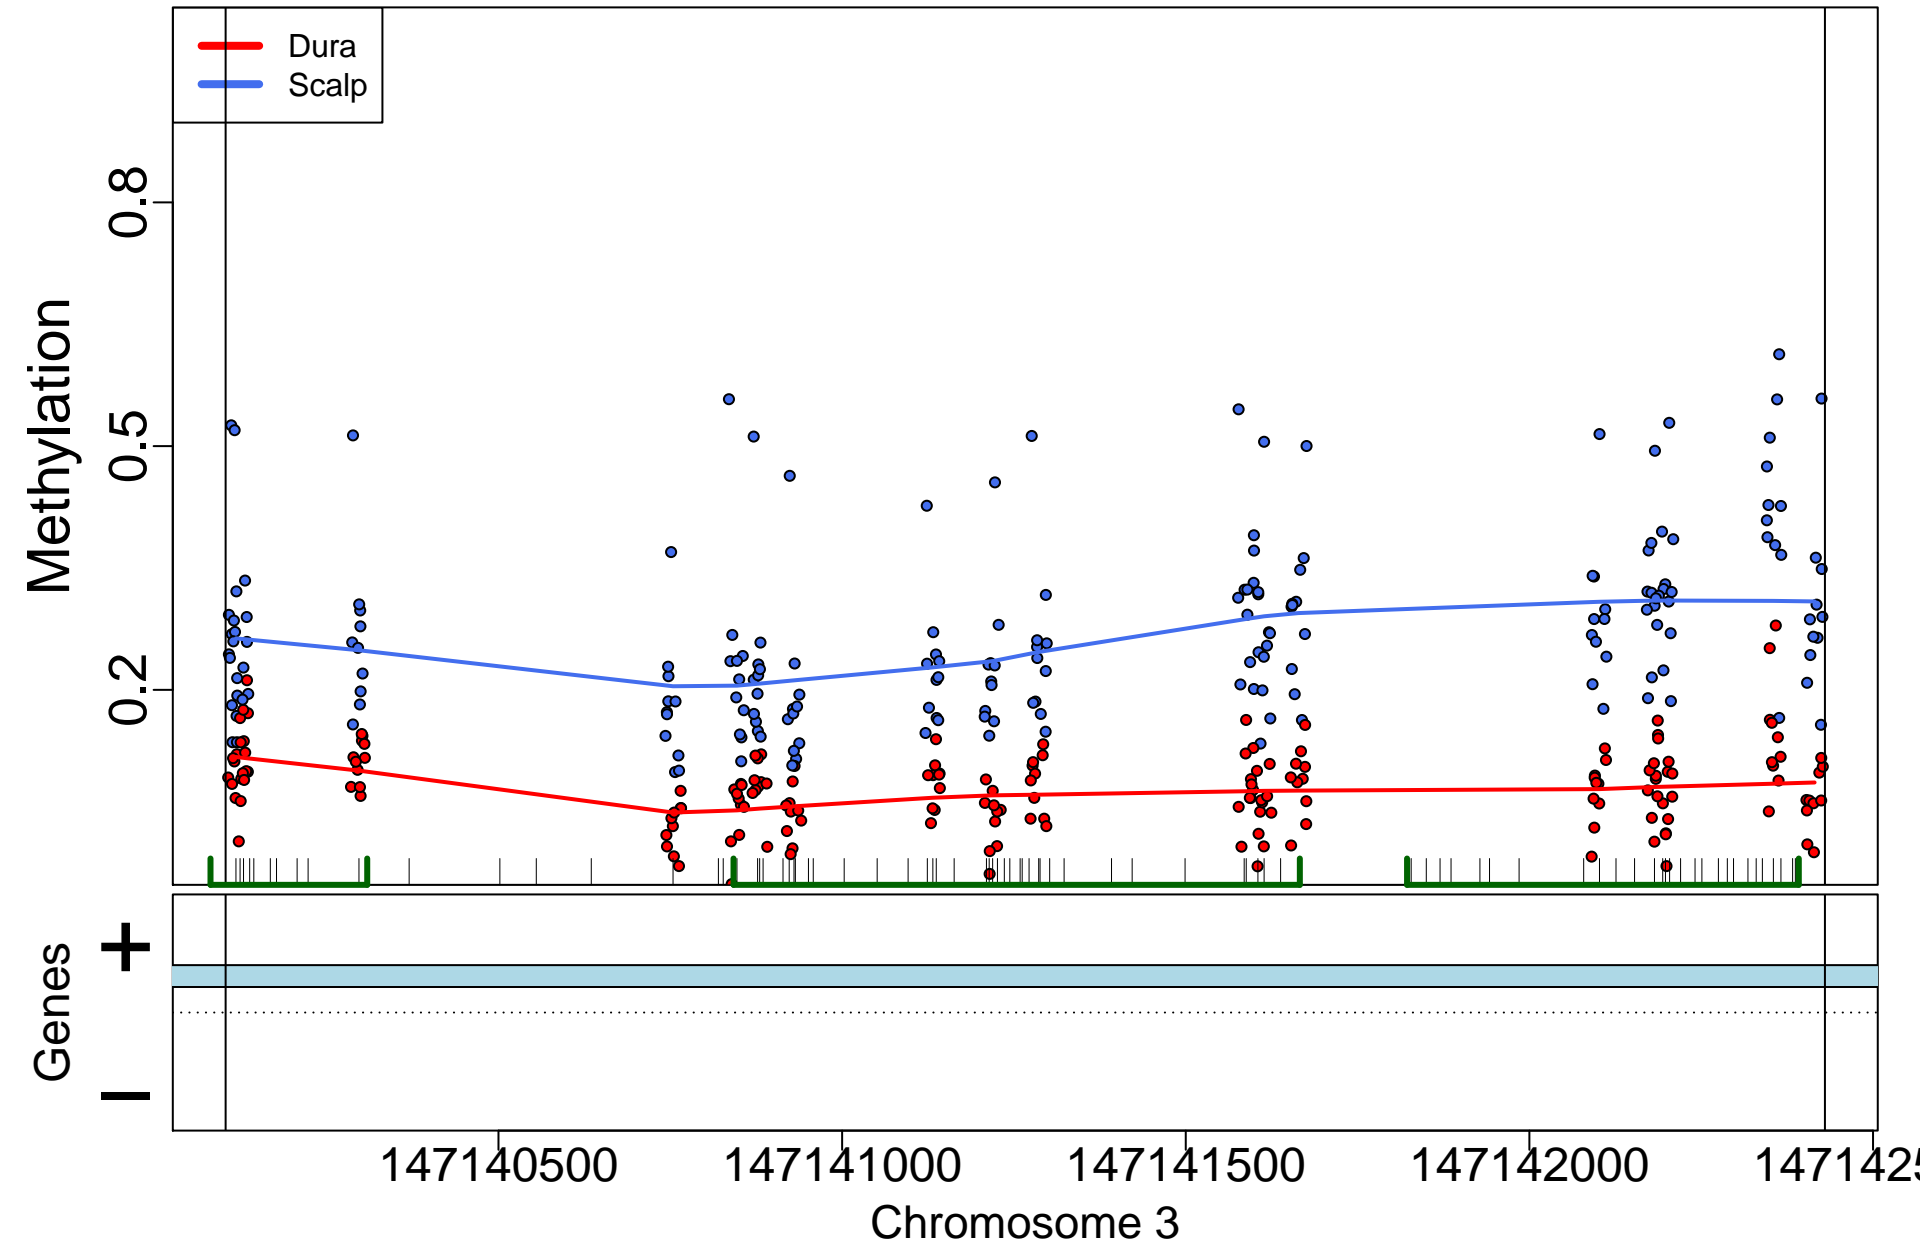

FOXD2-AS1; 0bp from tss:NA

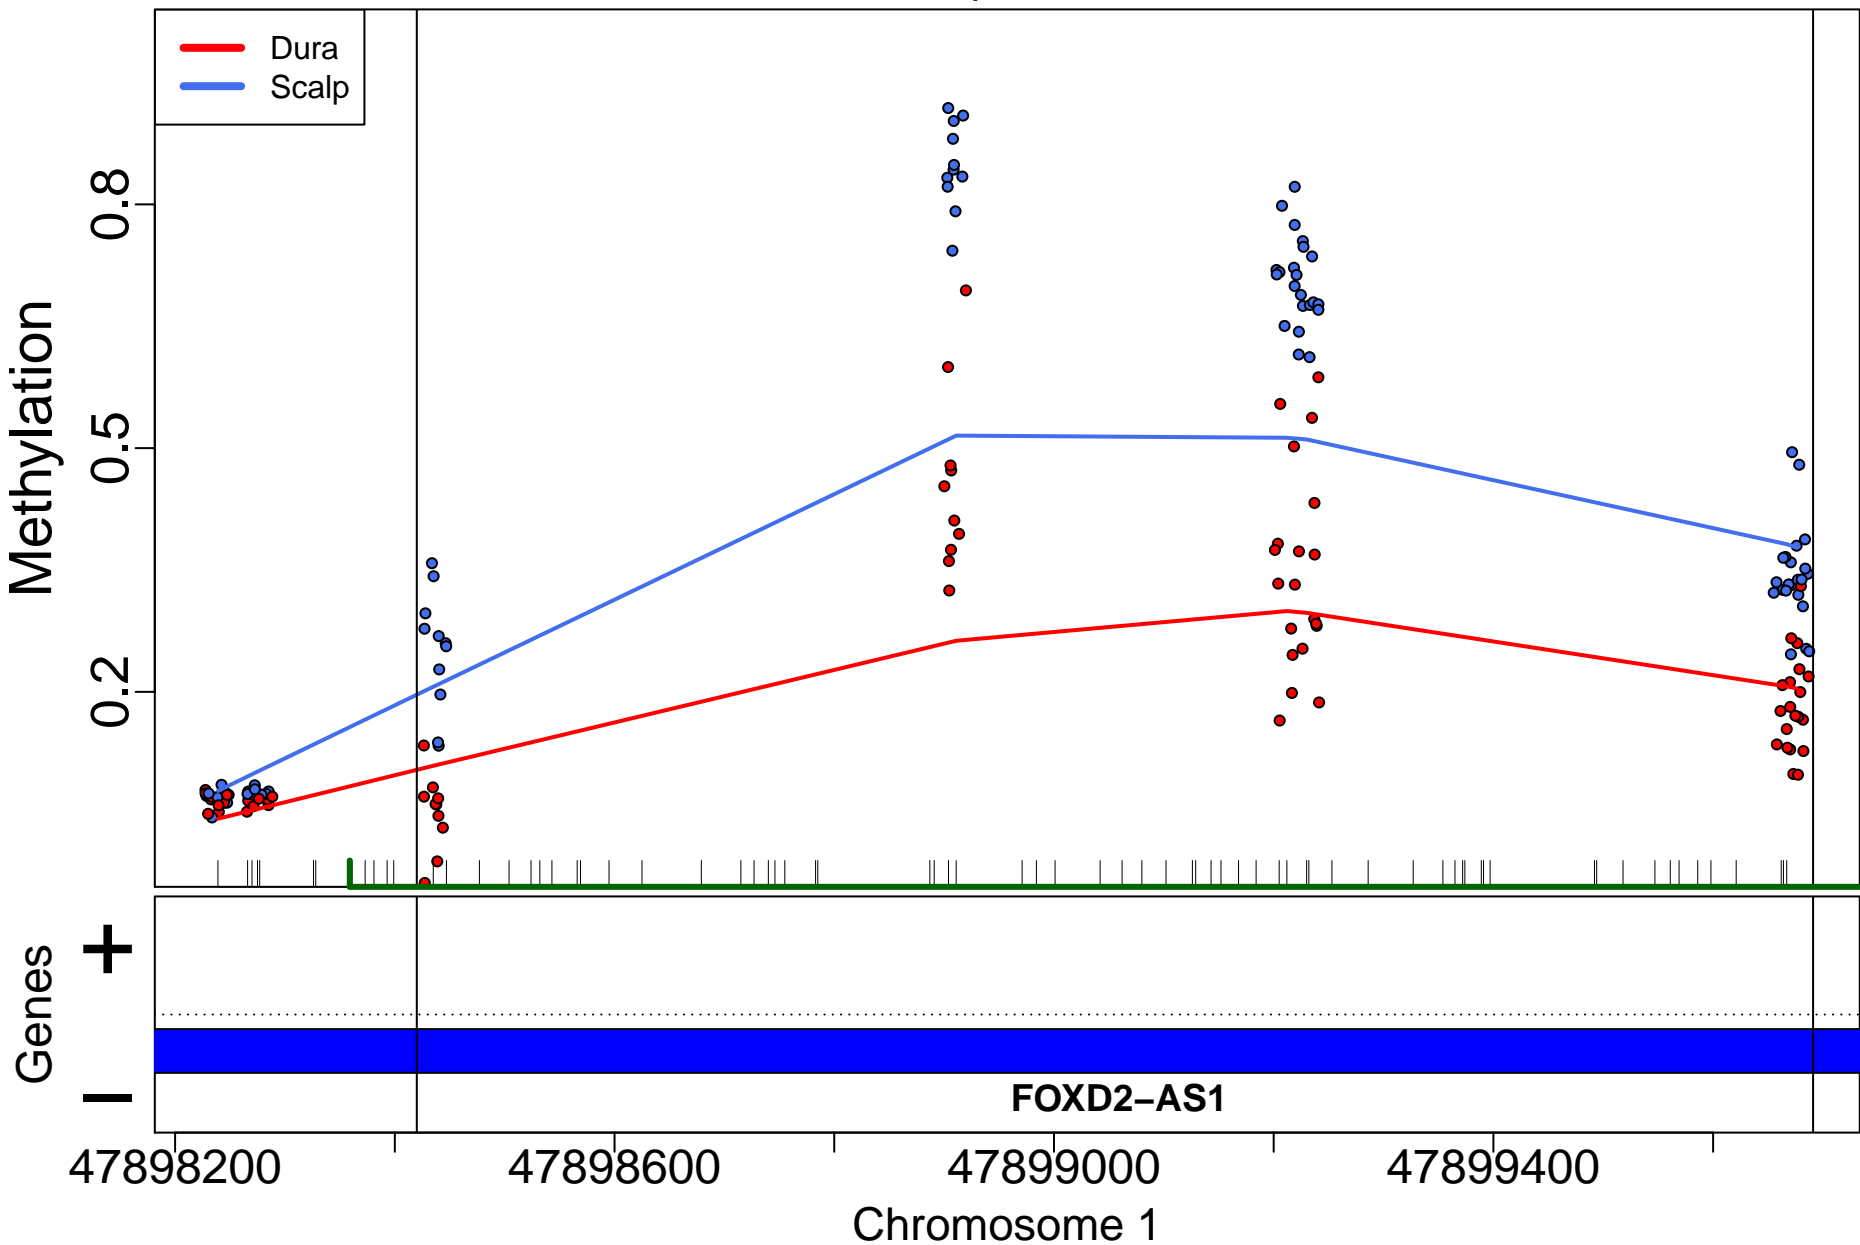



HOXC5; 1052bp from tss:overlaps exon upstream

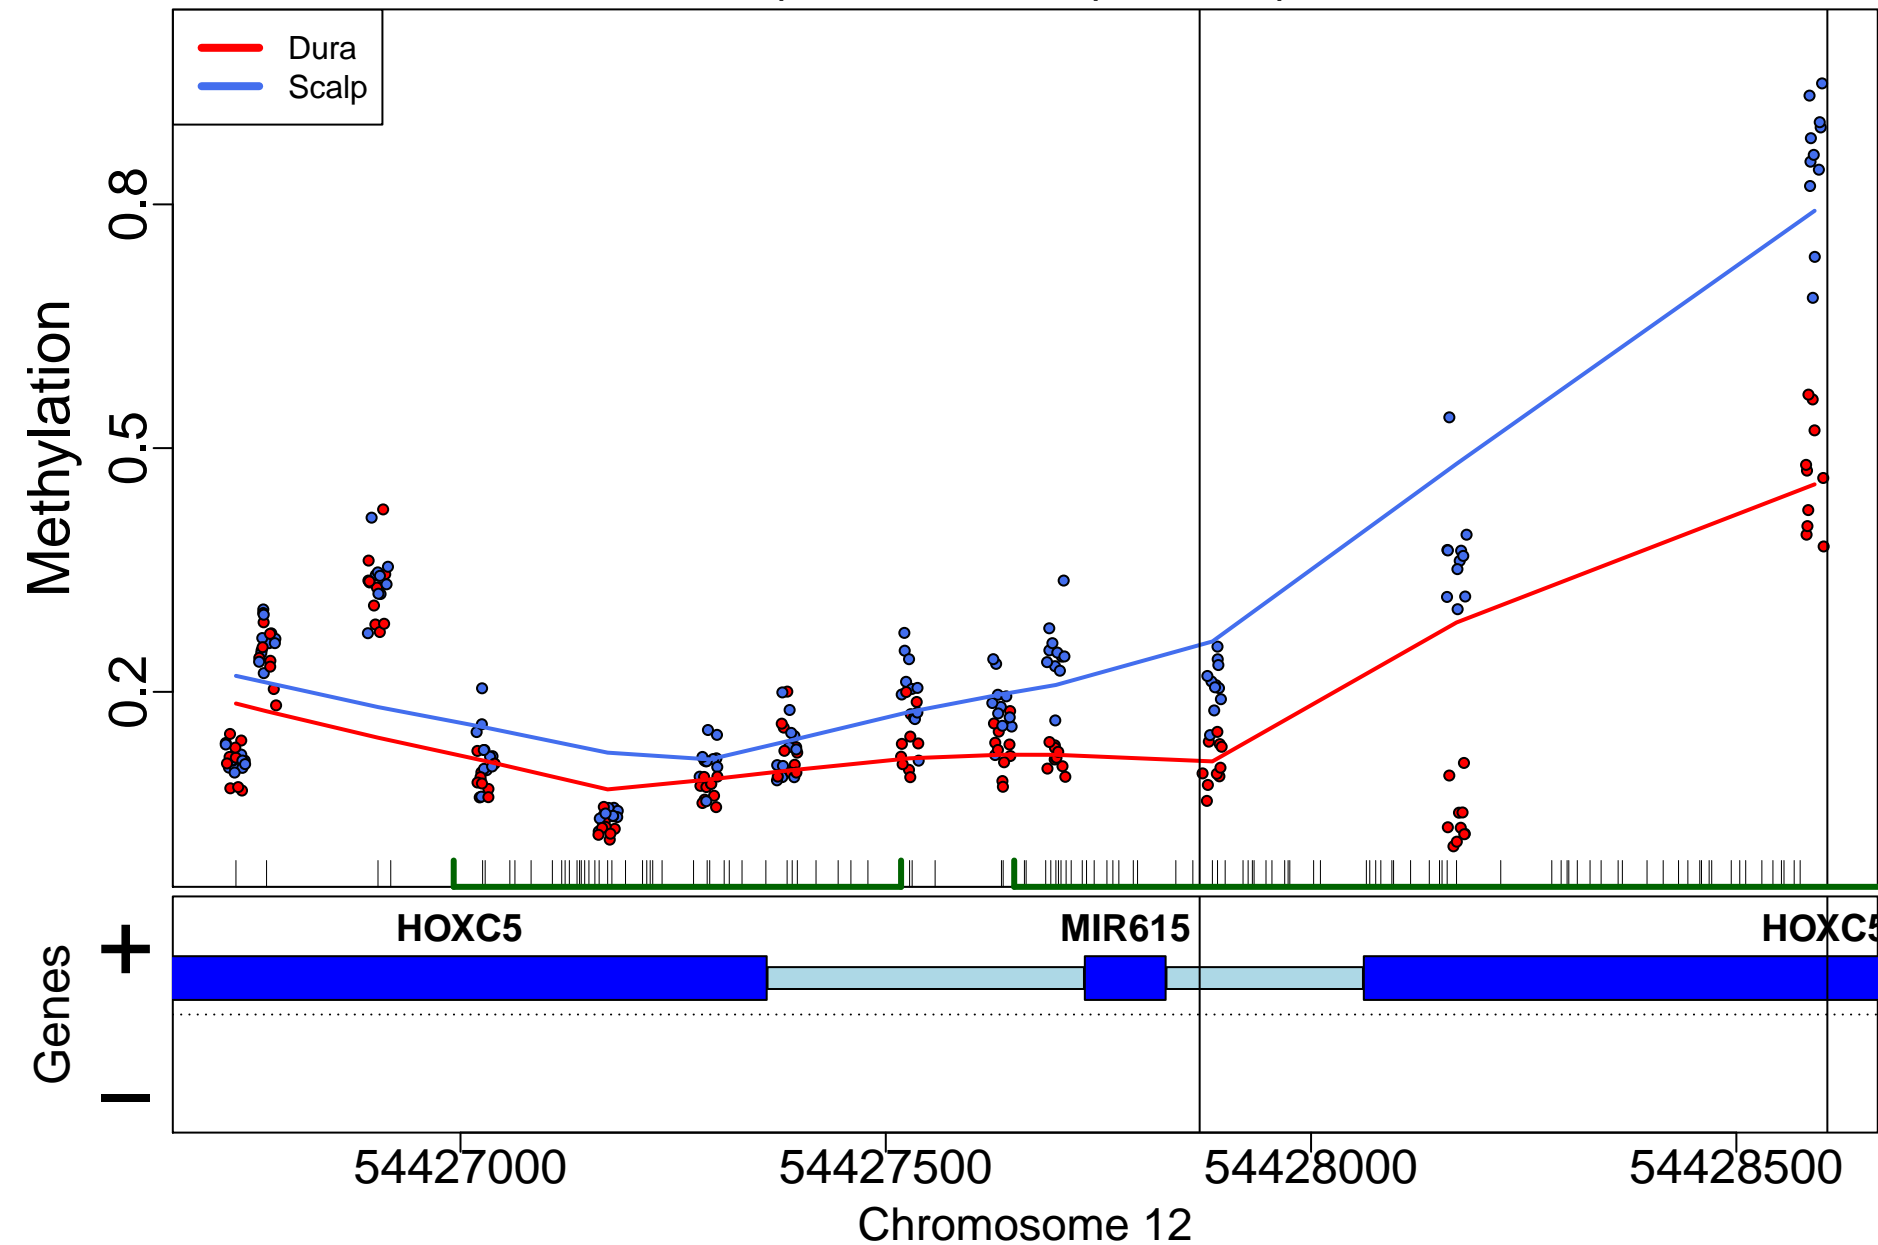

LINC00880; 0bp from tss:NA

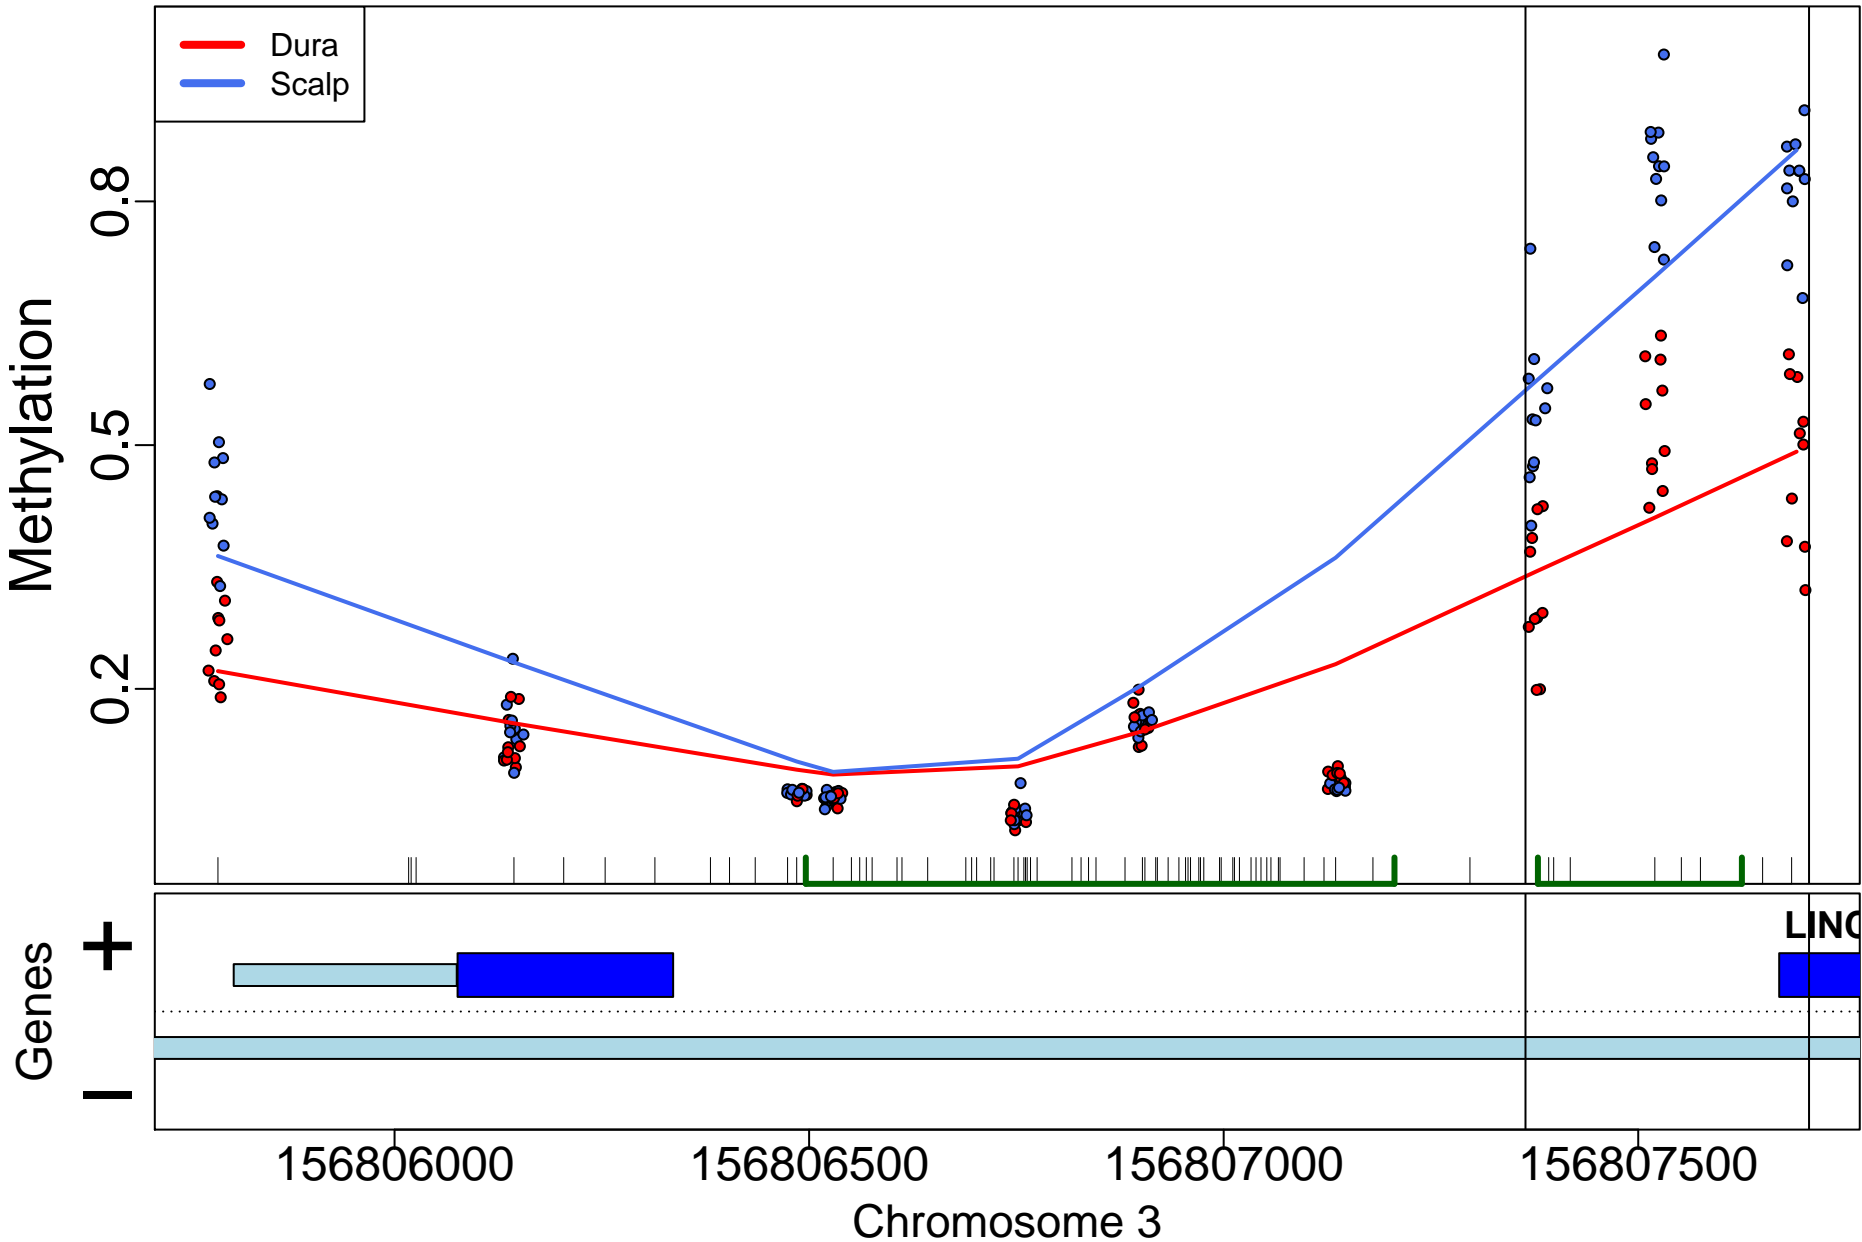

TRIB2; 576bp from tss:promoter

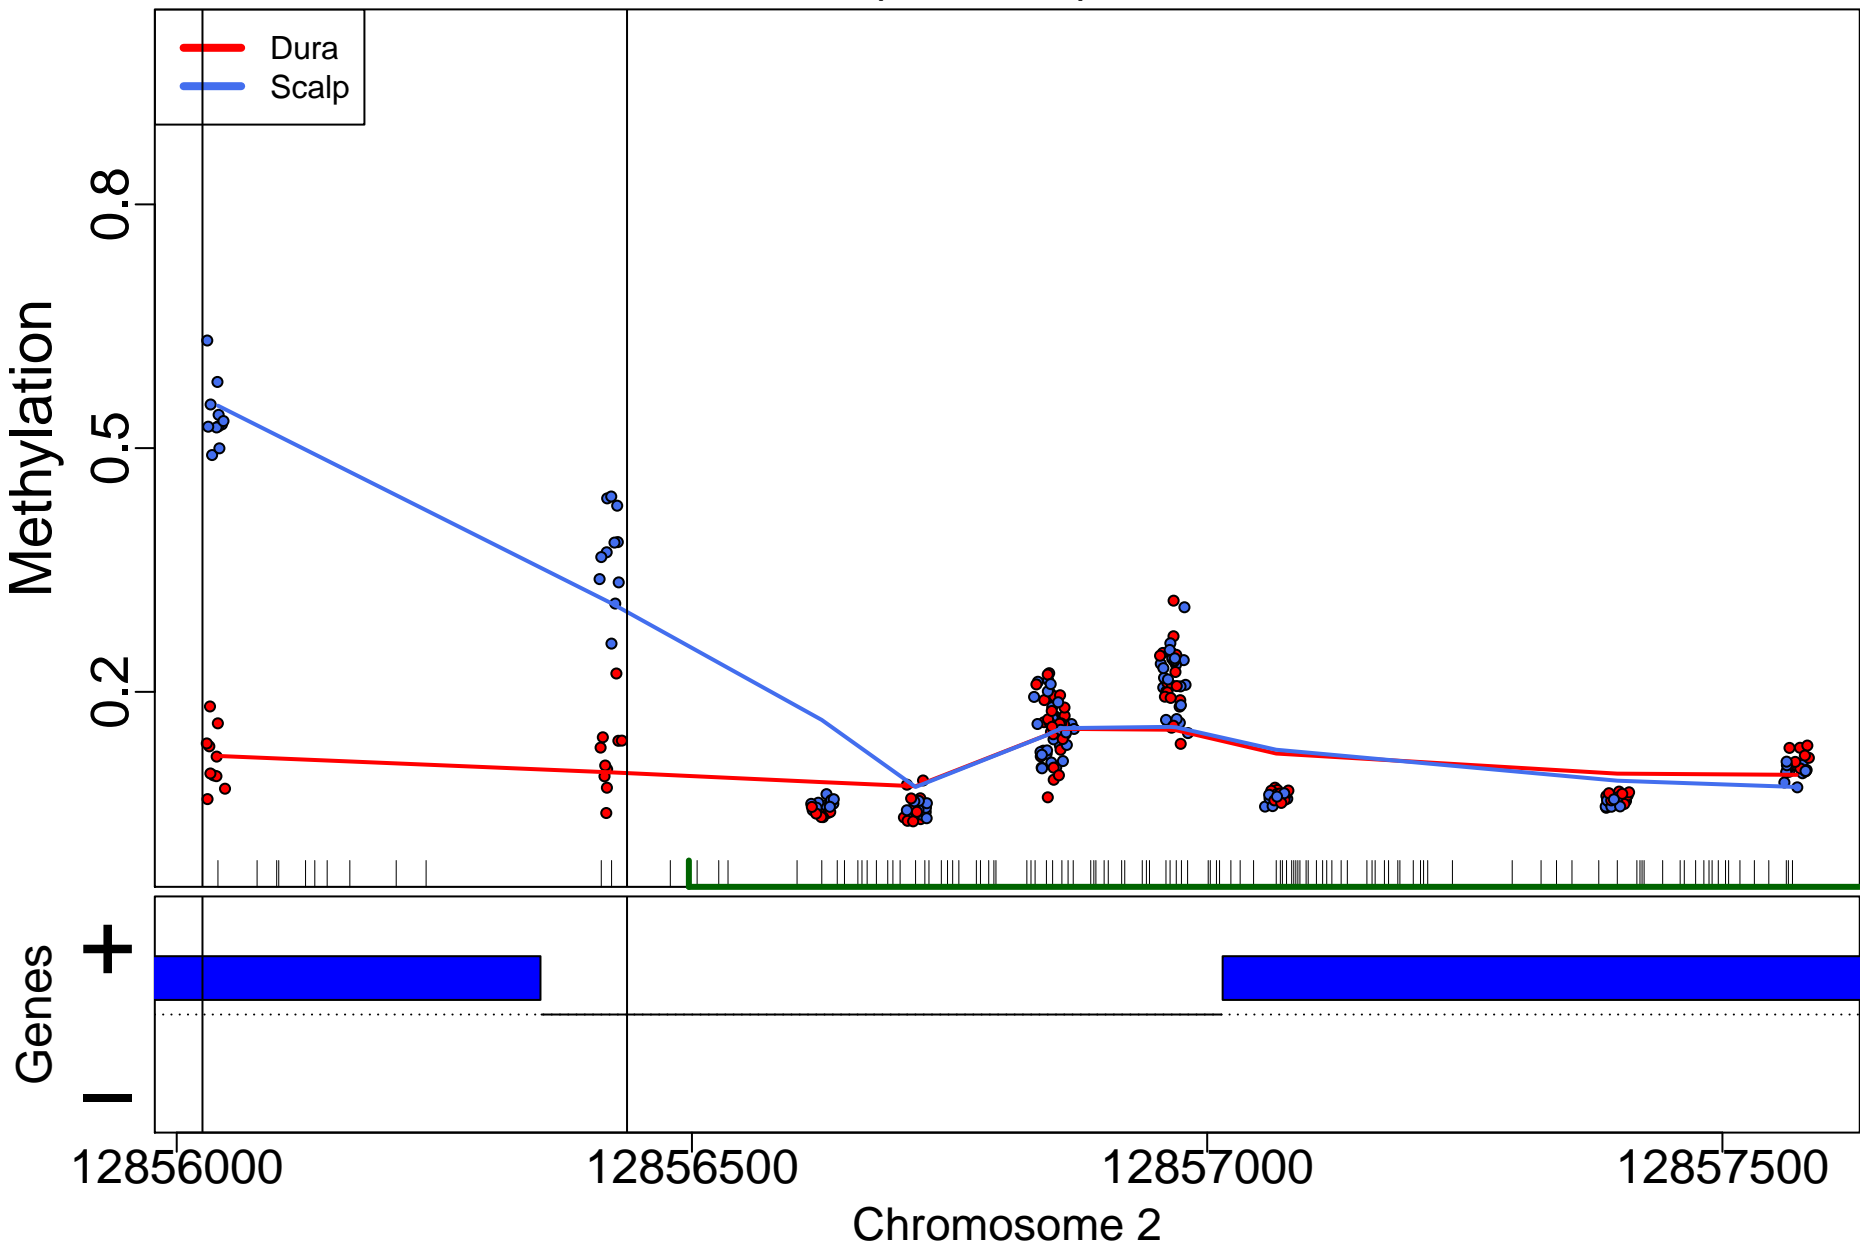

# S100A10; 1278bp from tss:promoter

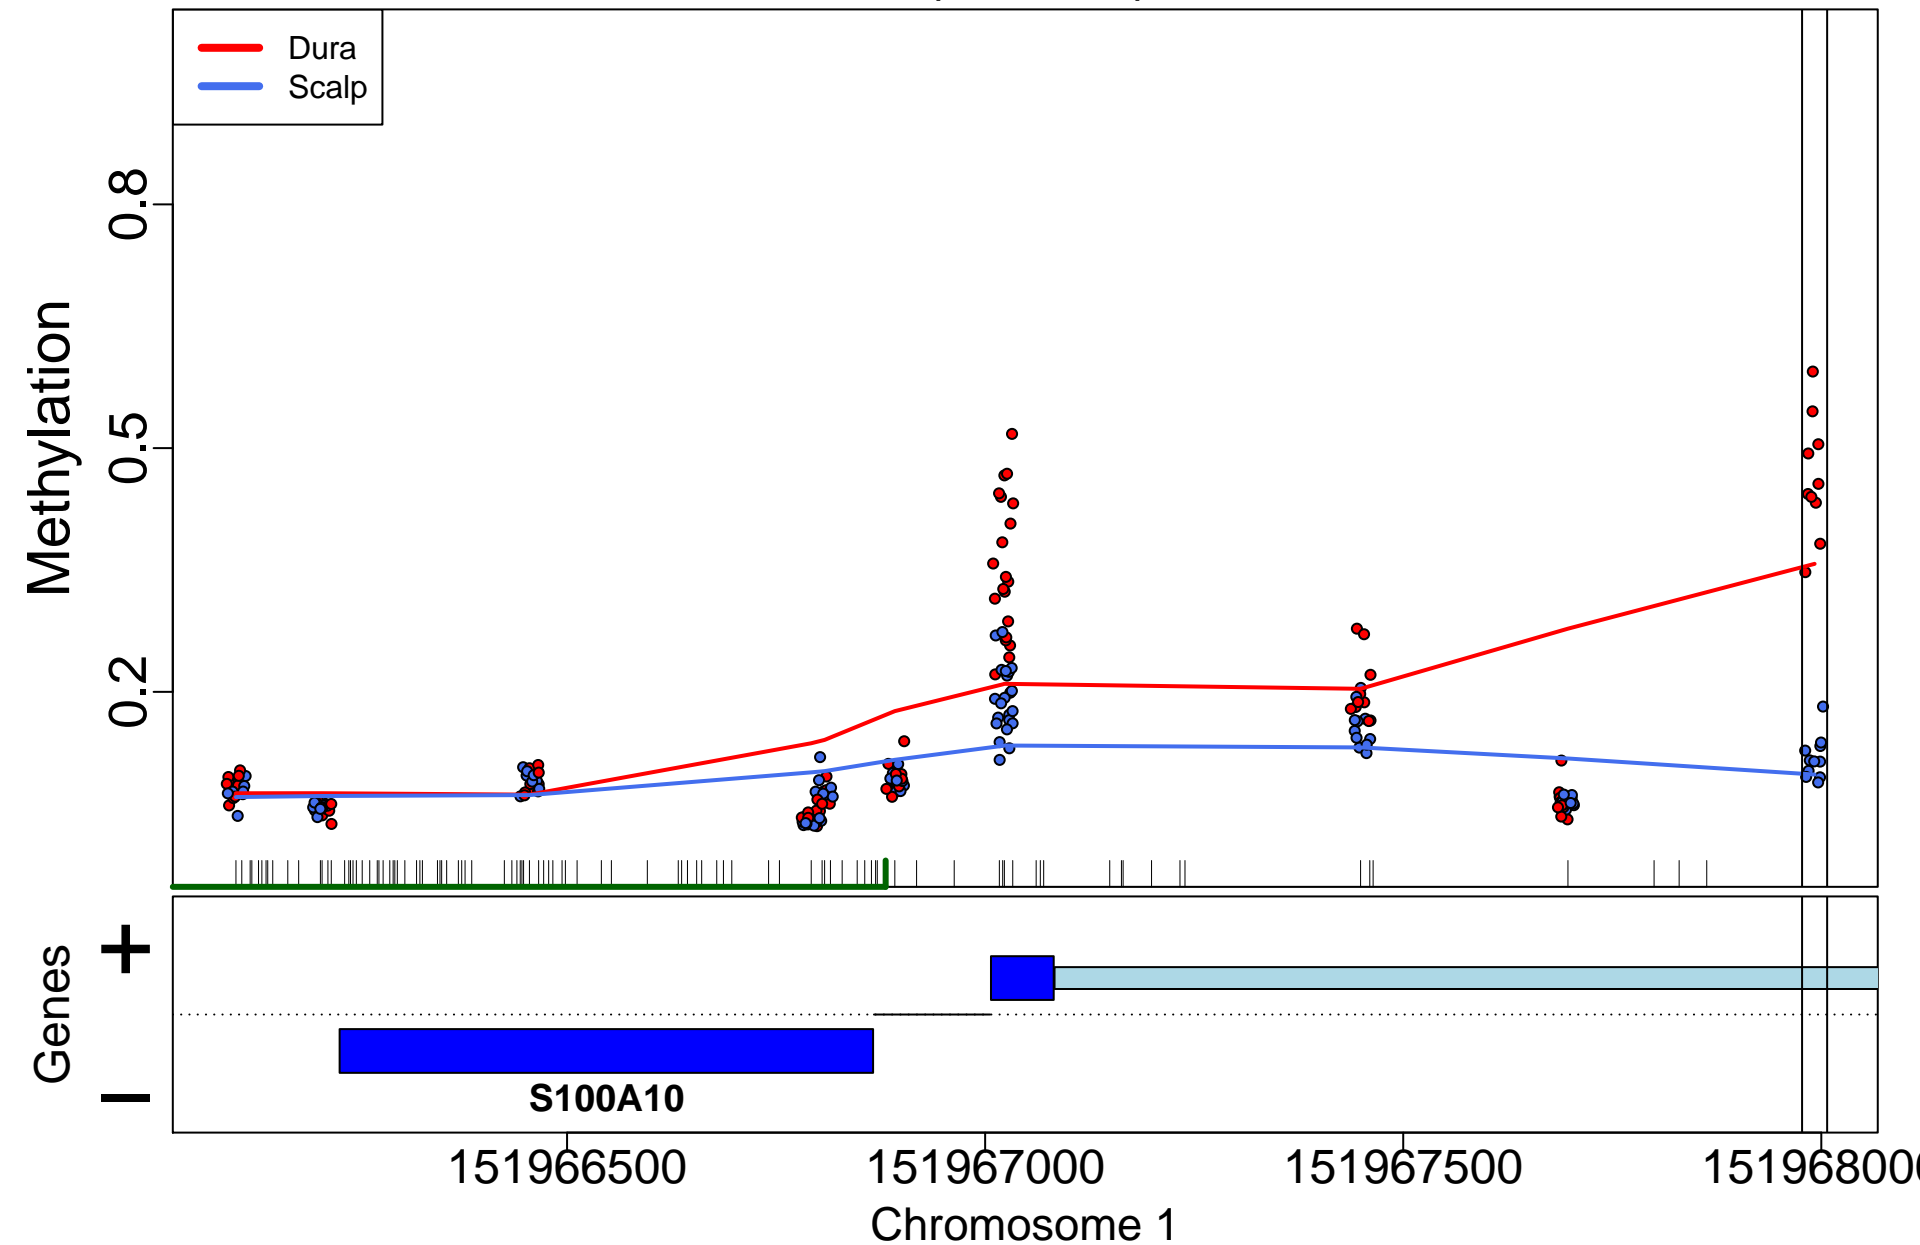

PRDM6; 0bp from tss:NA

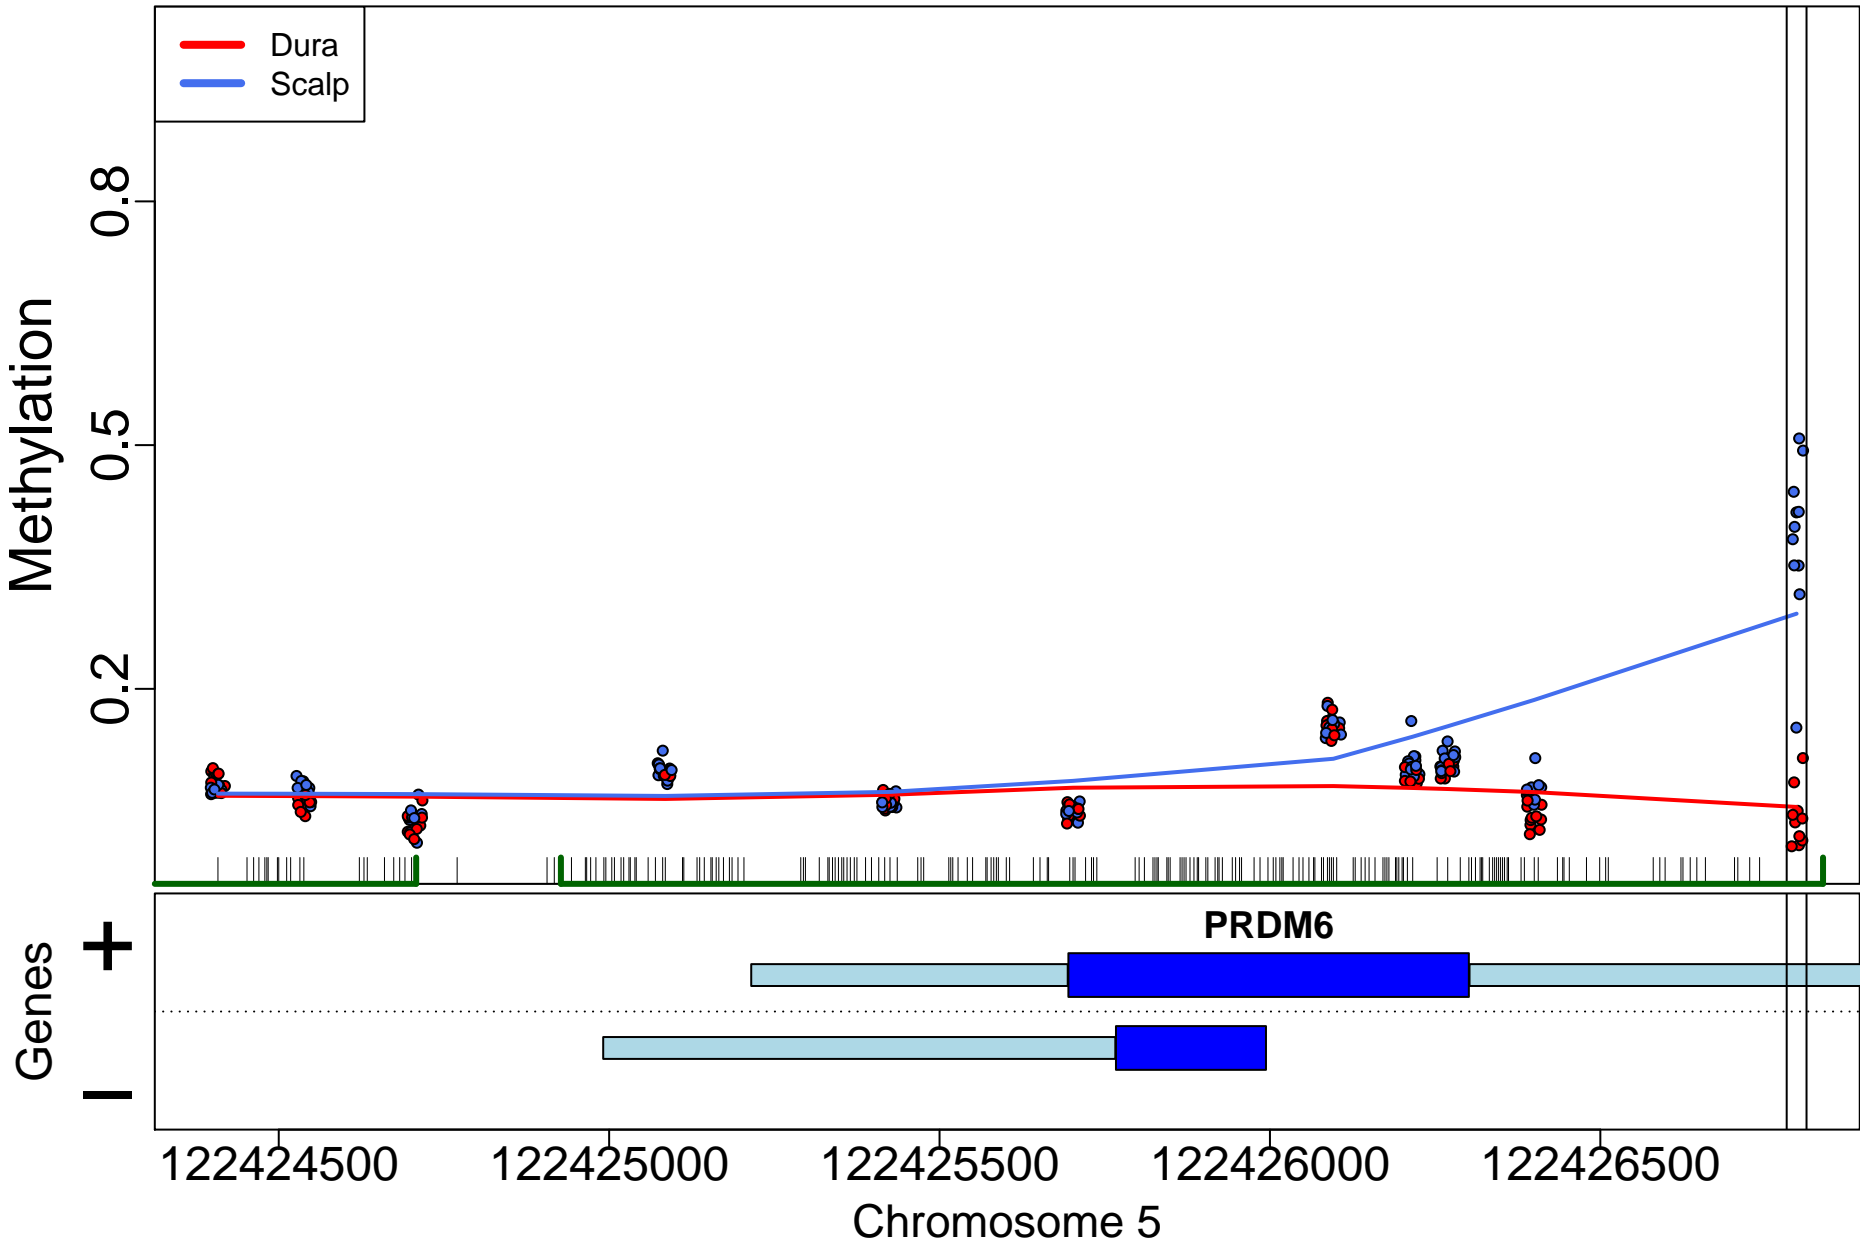

# GSAP; 844bp from tss:inside intron

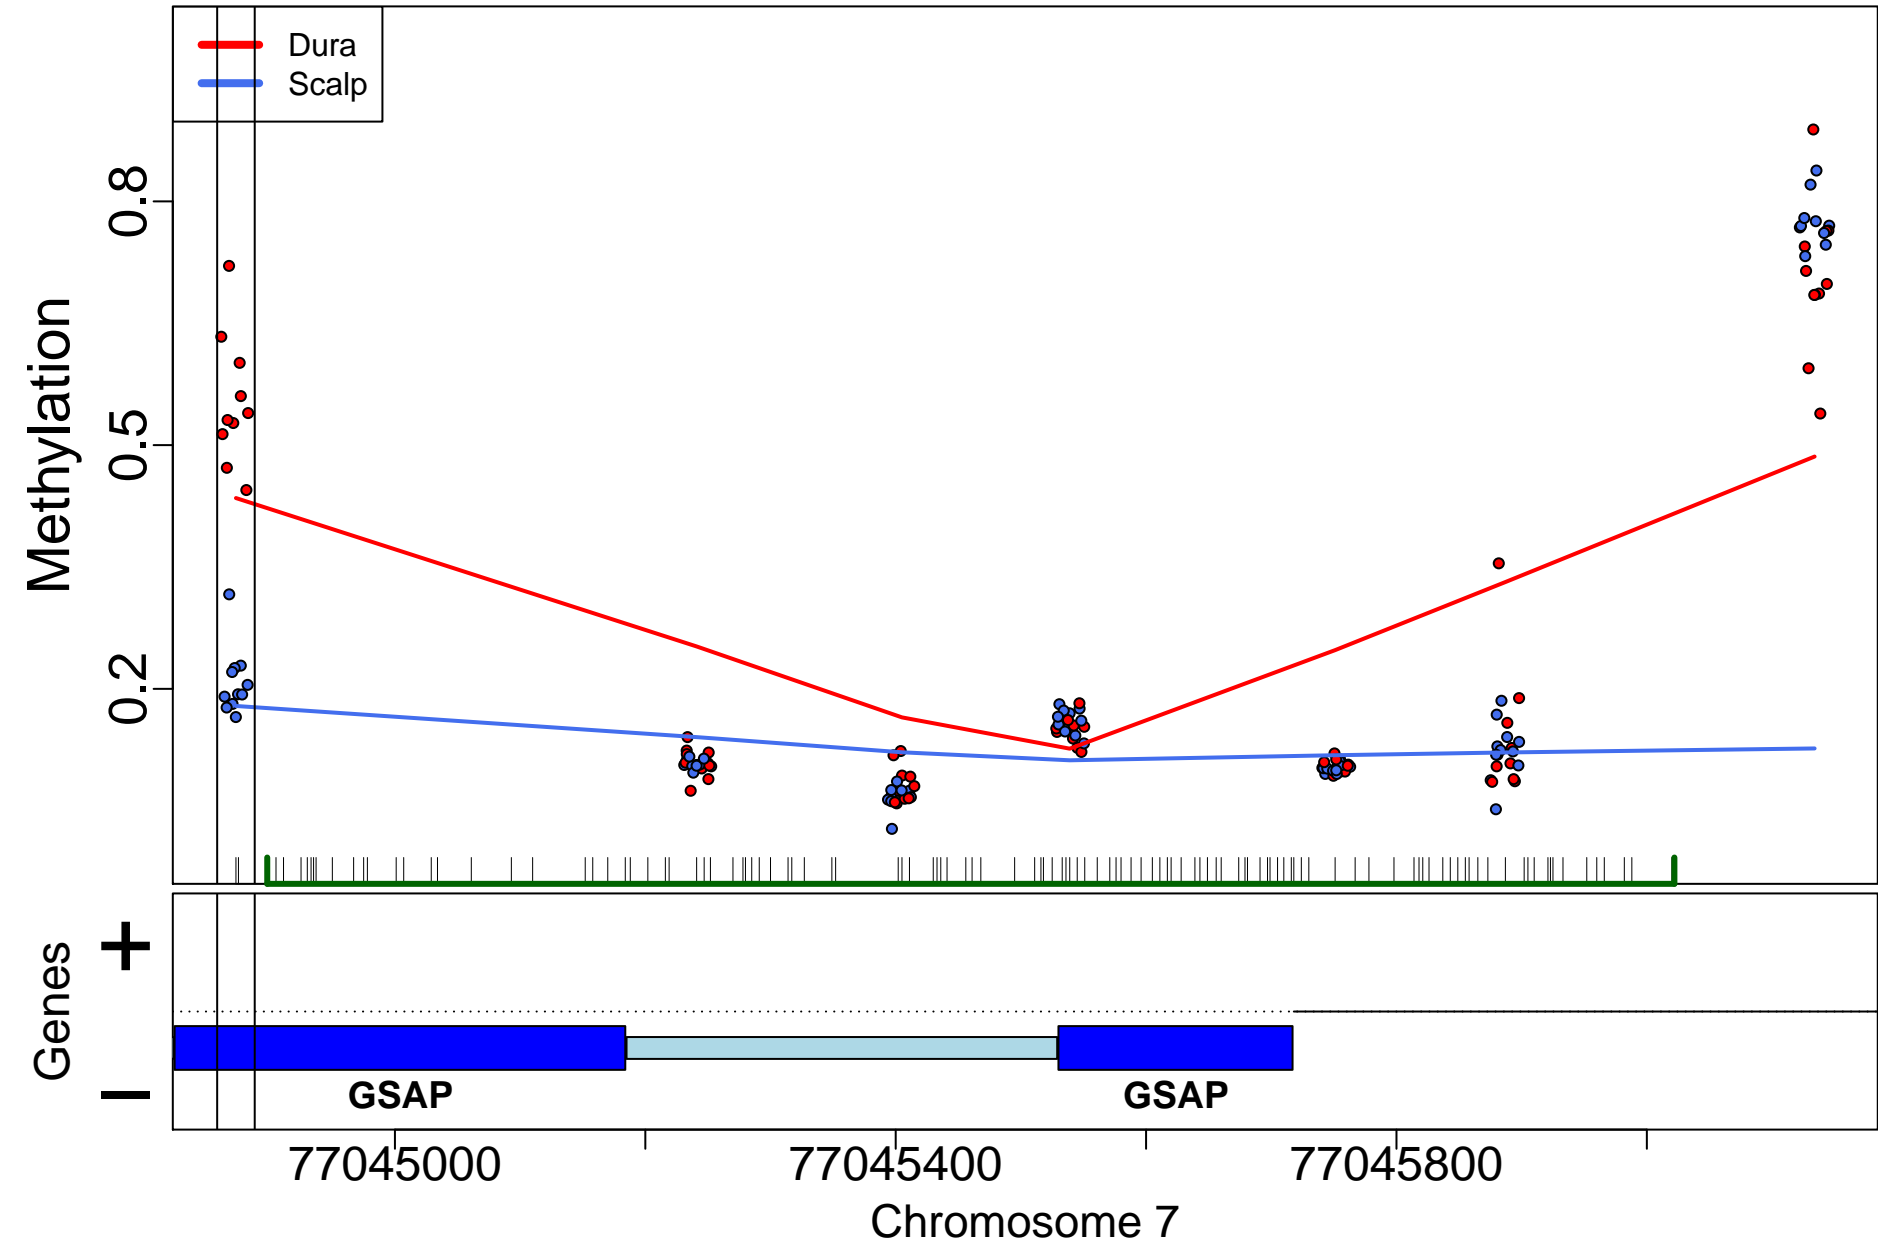

FXYP7; 0bp from tss:overlaps 5'

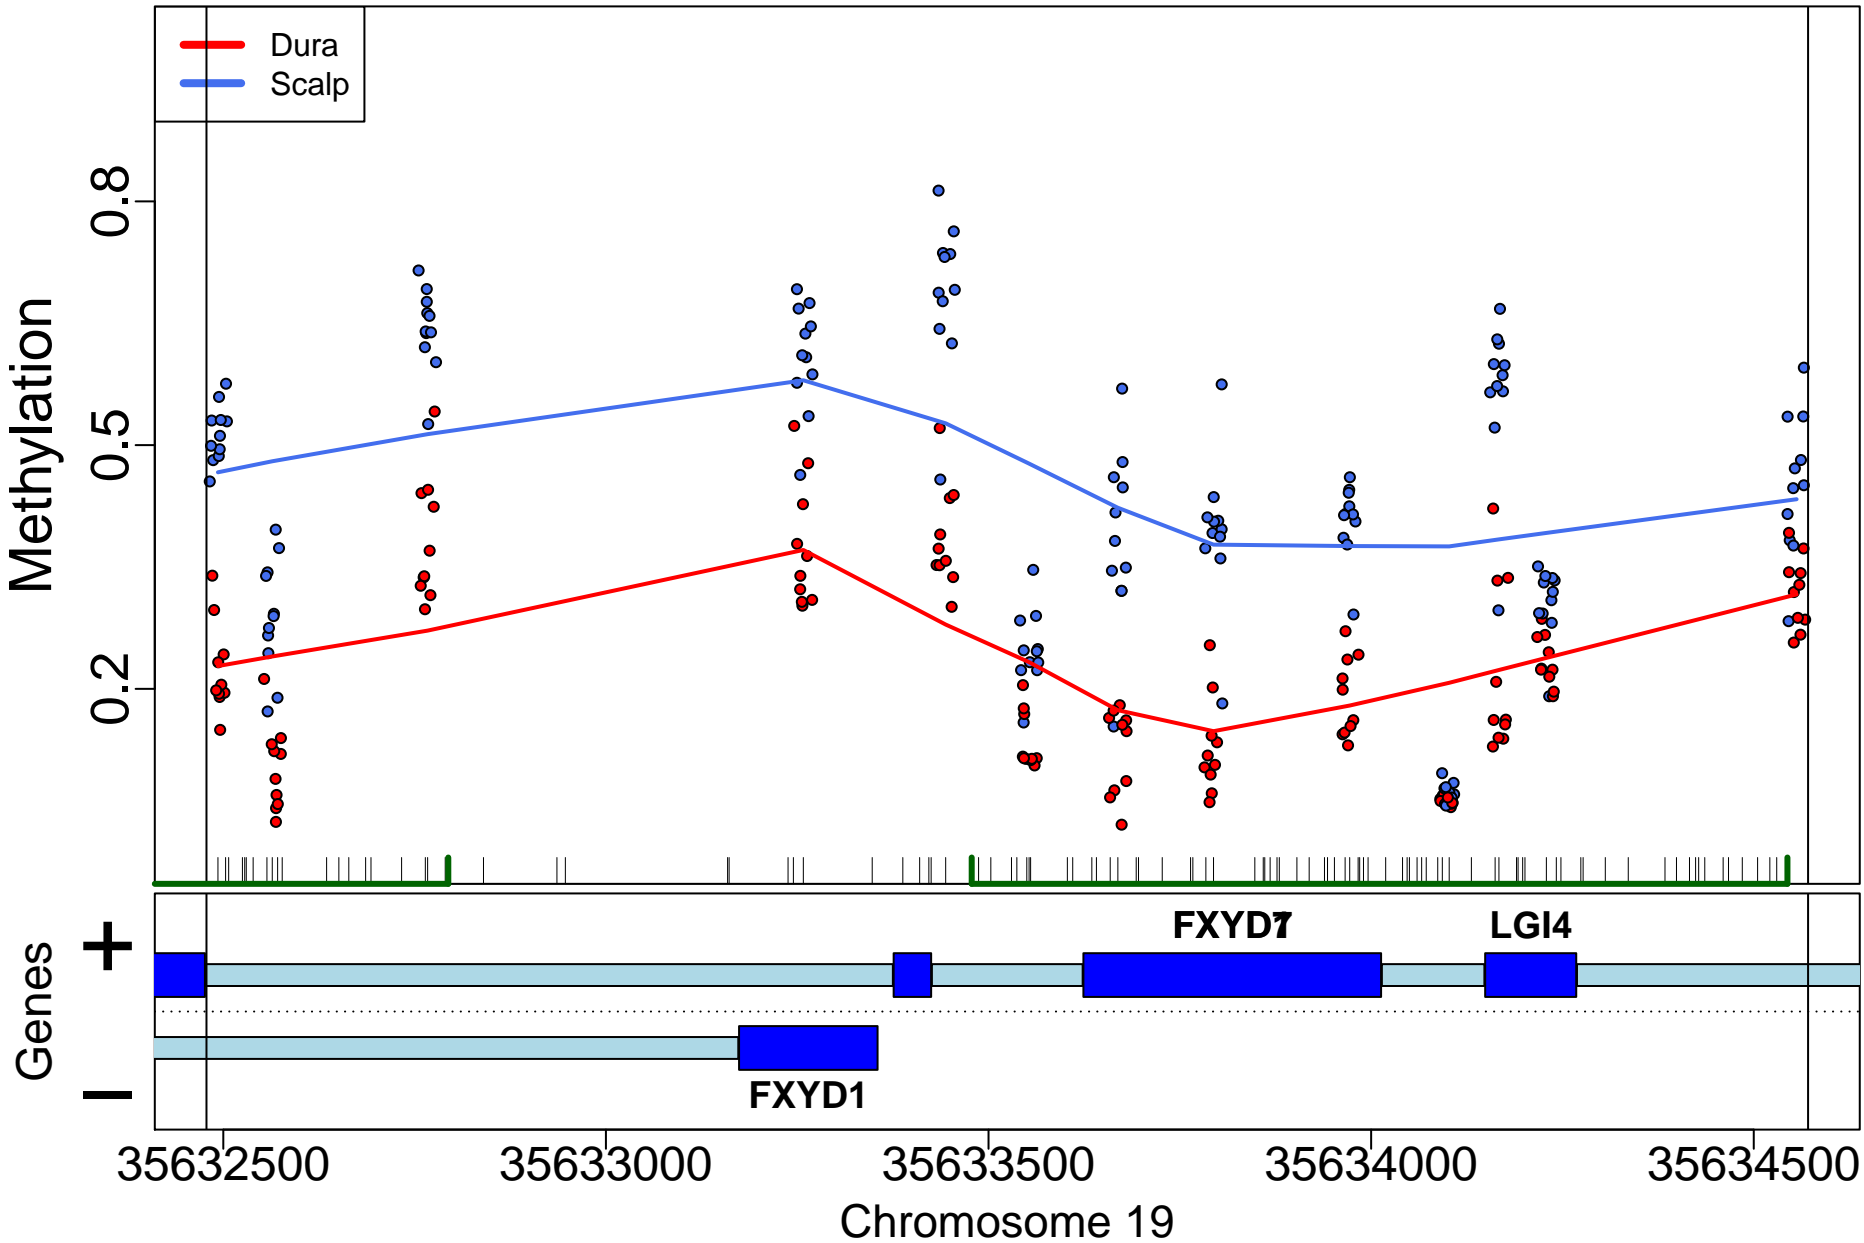

## DLX6-AS1; 0bp from tss:NA

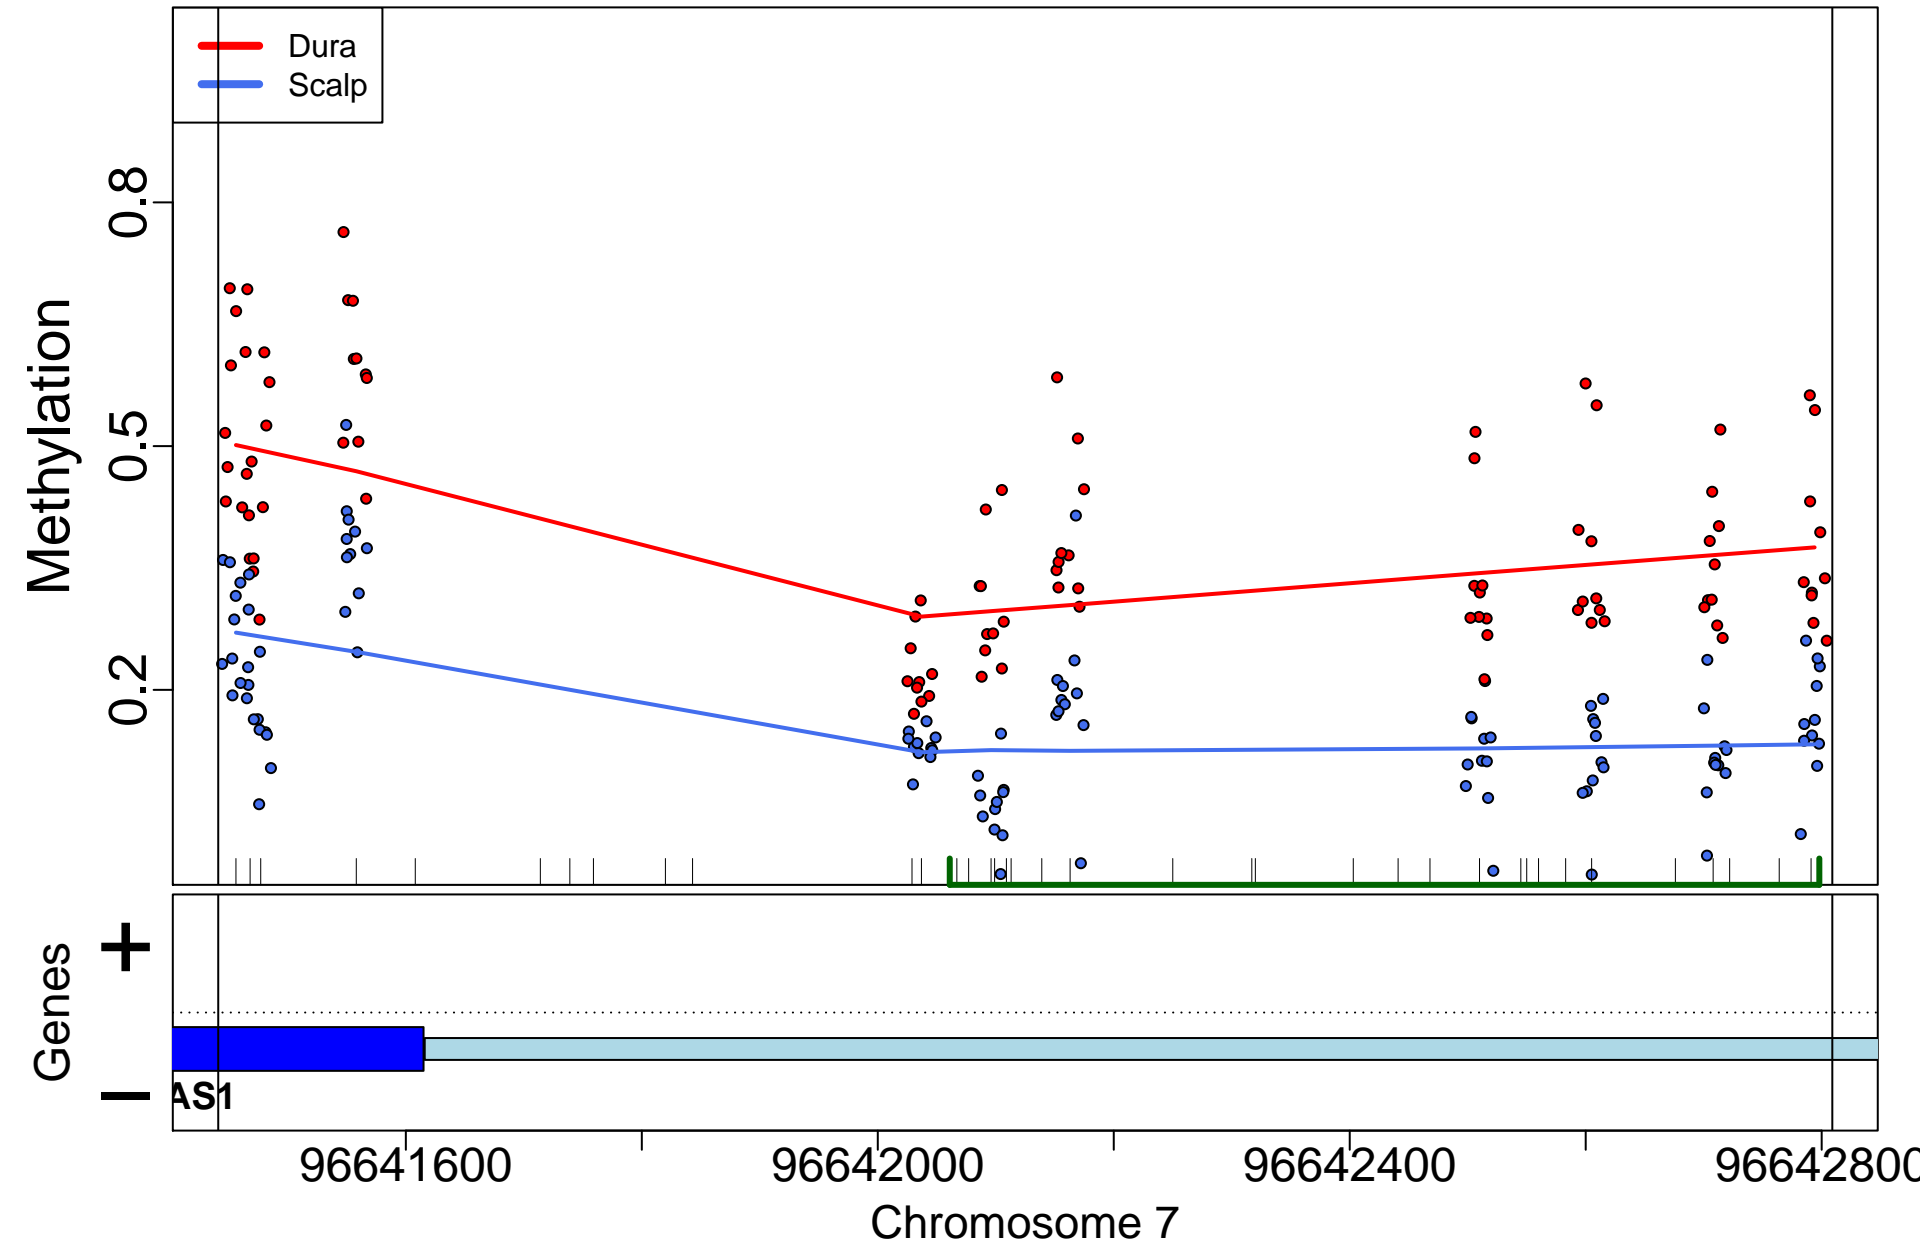



SLIT3; 362bp from tss:promoter

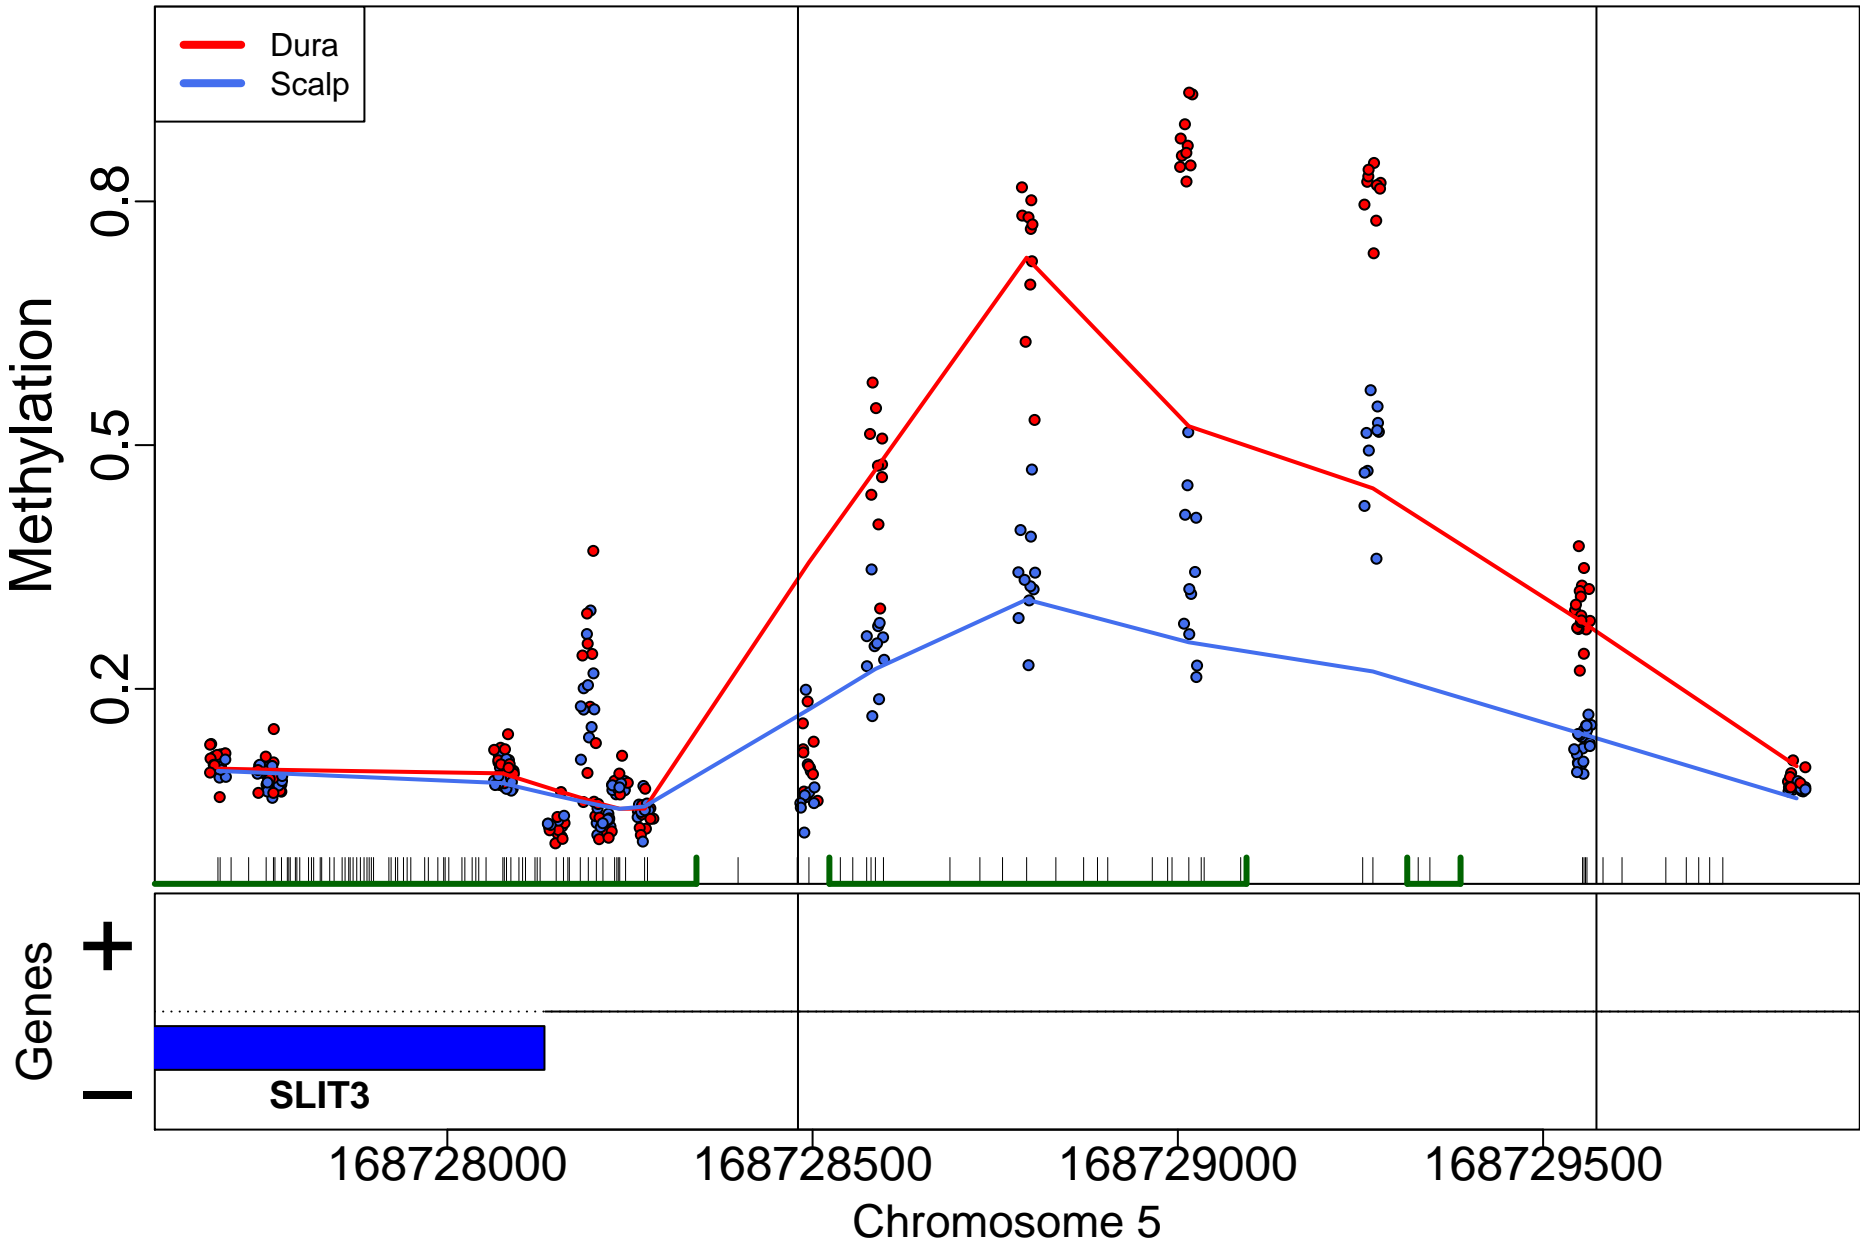

## C7orf50; 13830bp from tss:inside intron

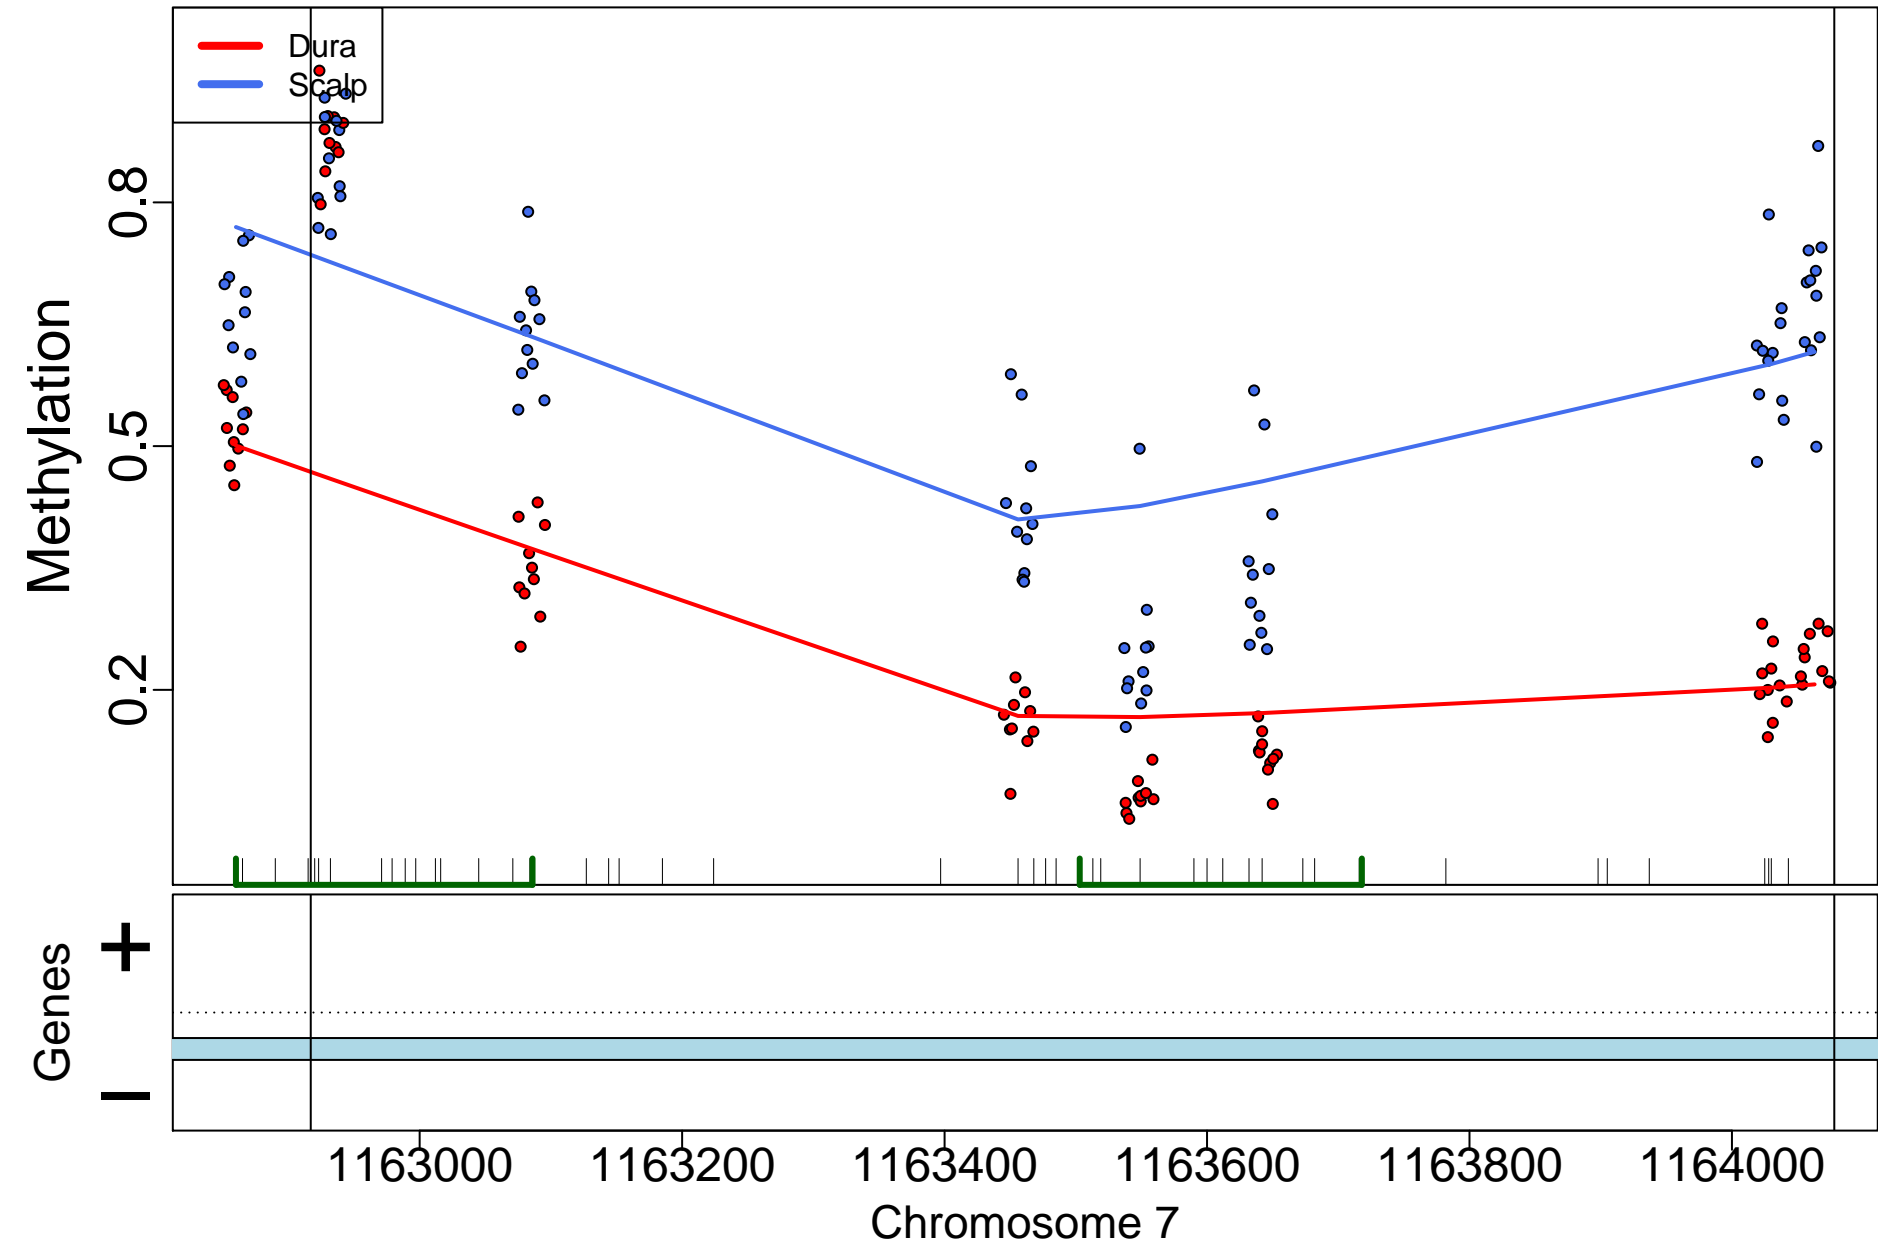

C13orf45; 324bp from tss:promoter

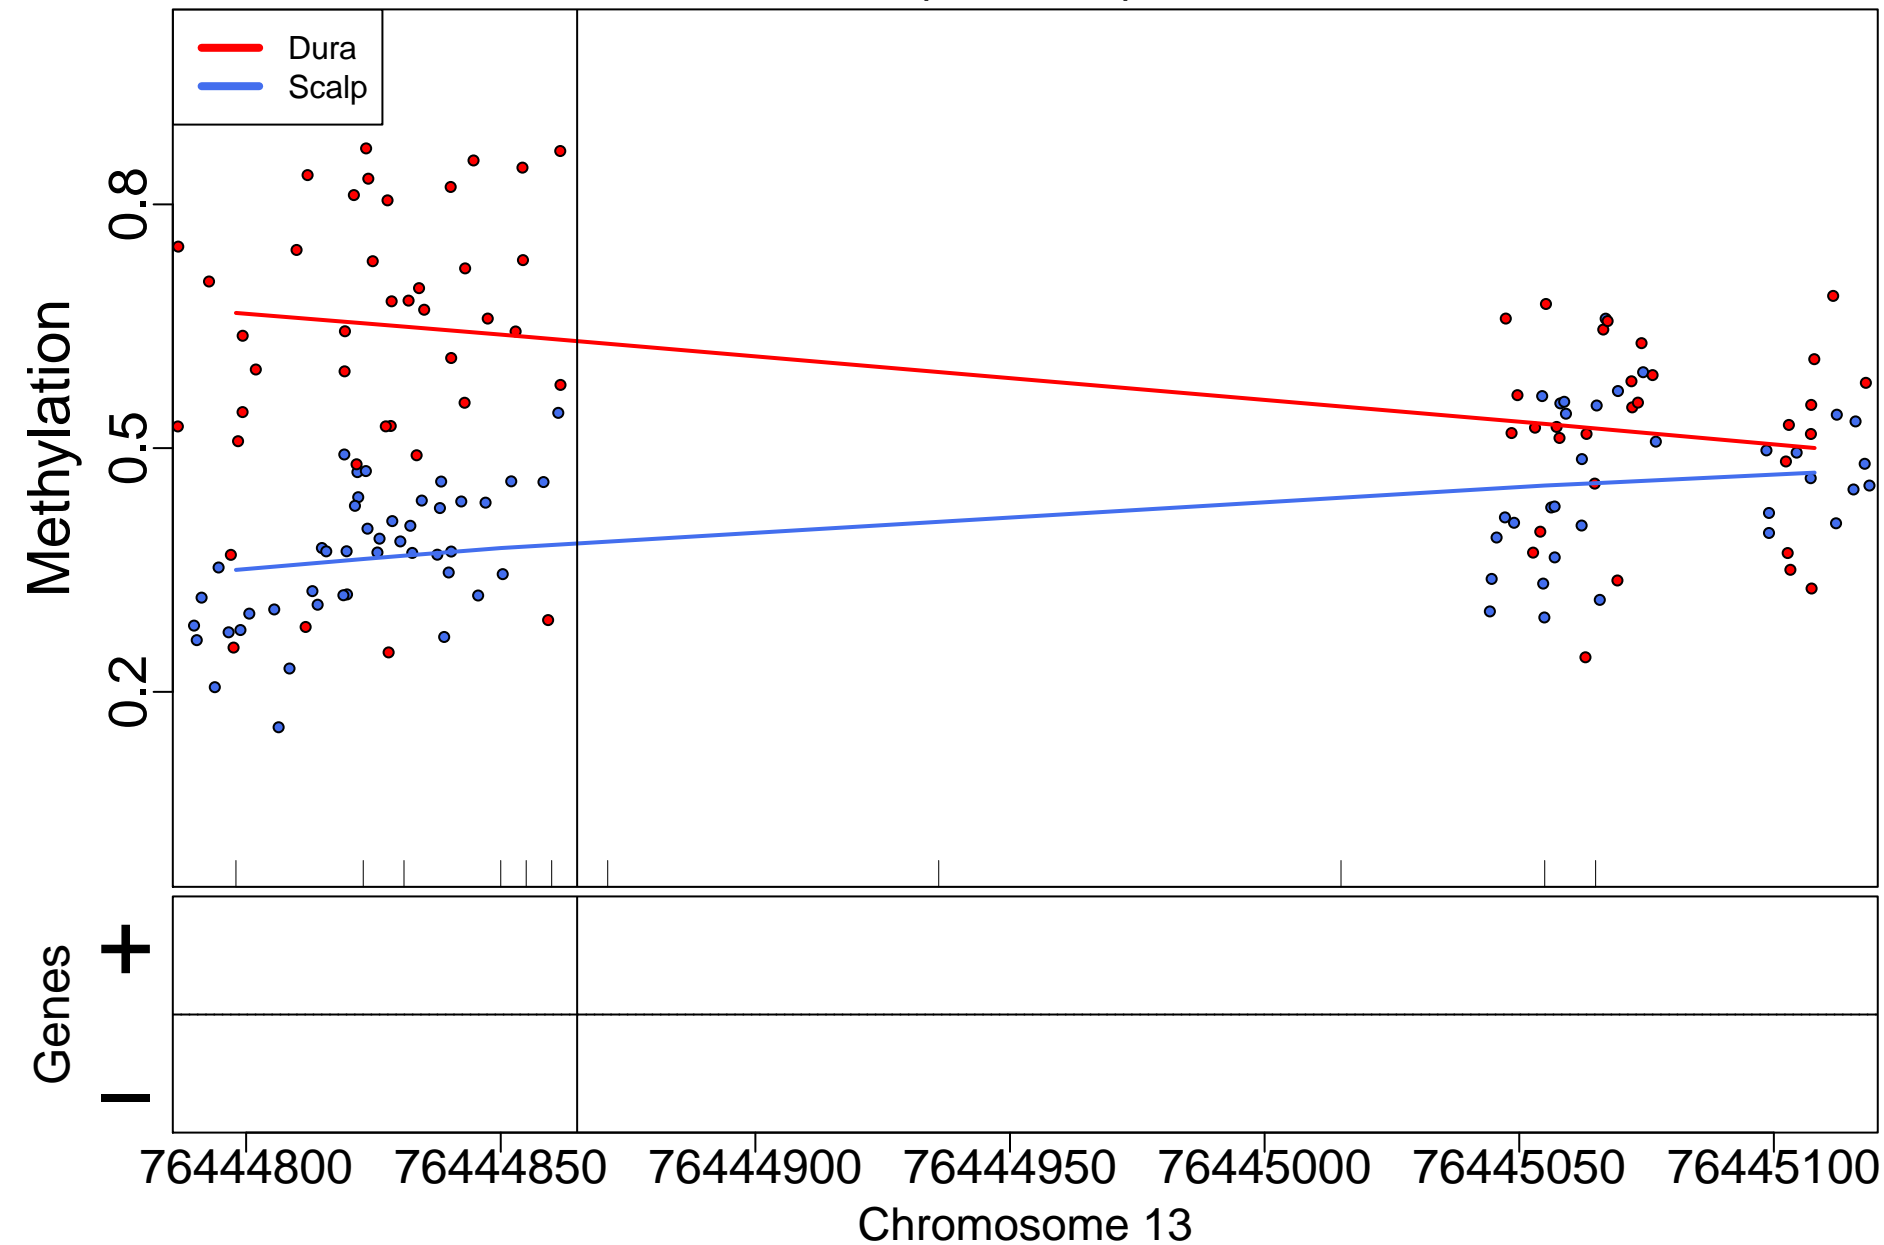

DGCR14; 13988bp from tss:inside exon

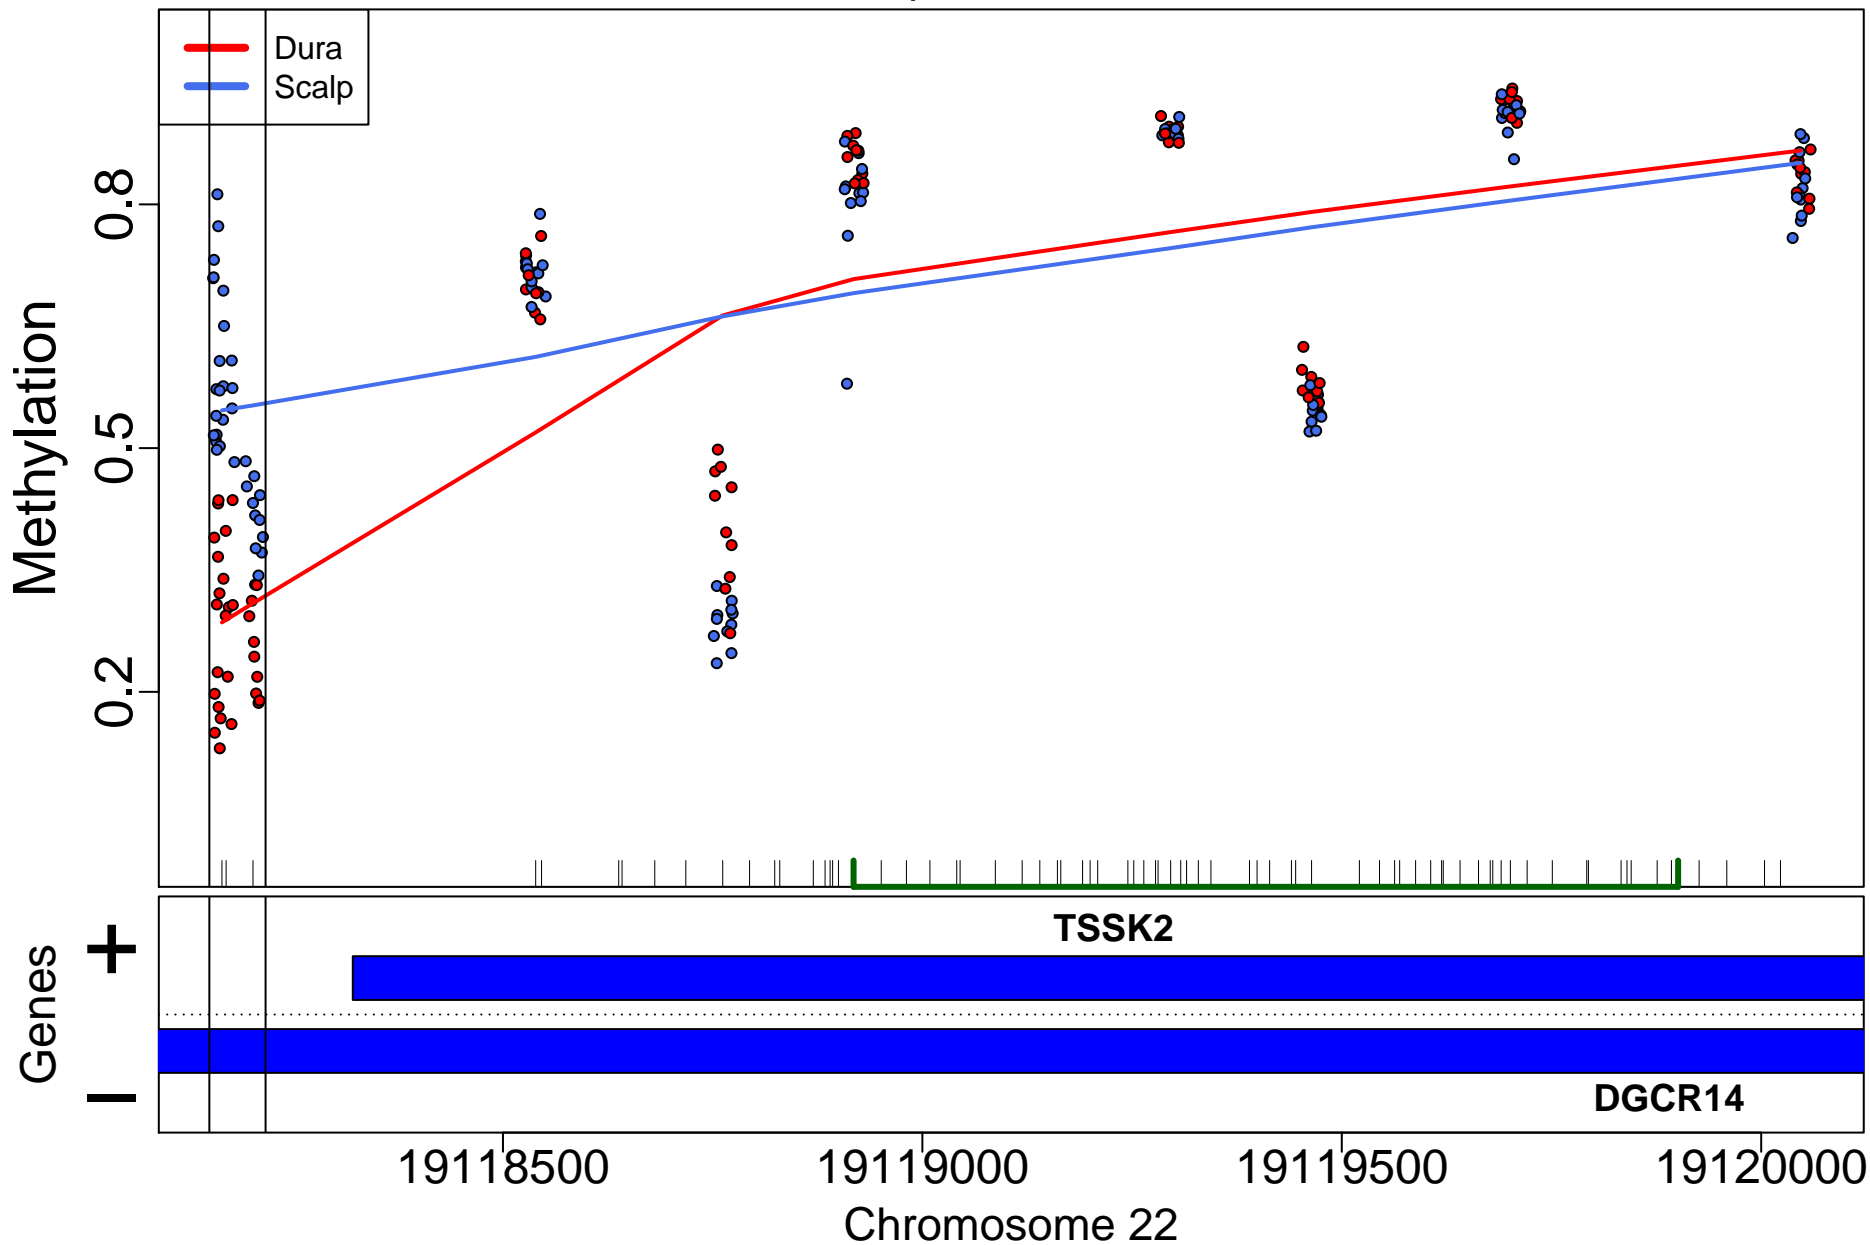

## AC018470.4; 0bp from tss:NA

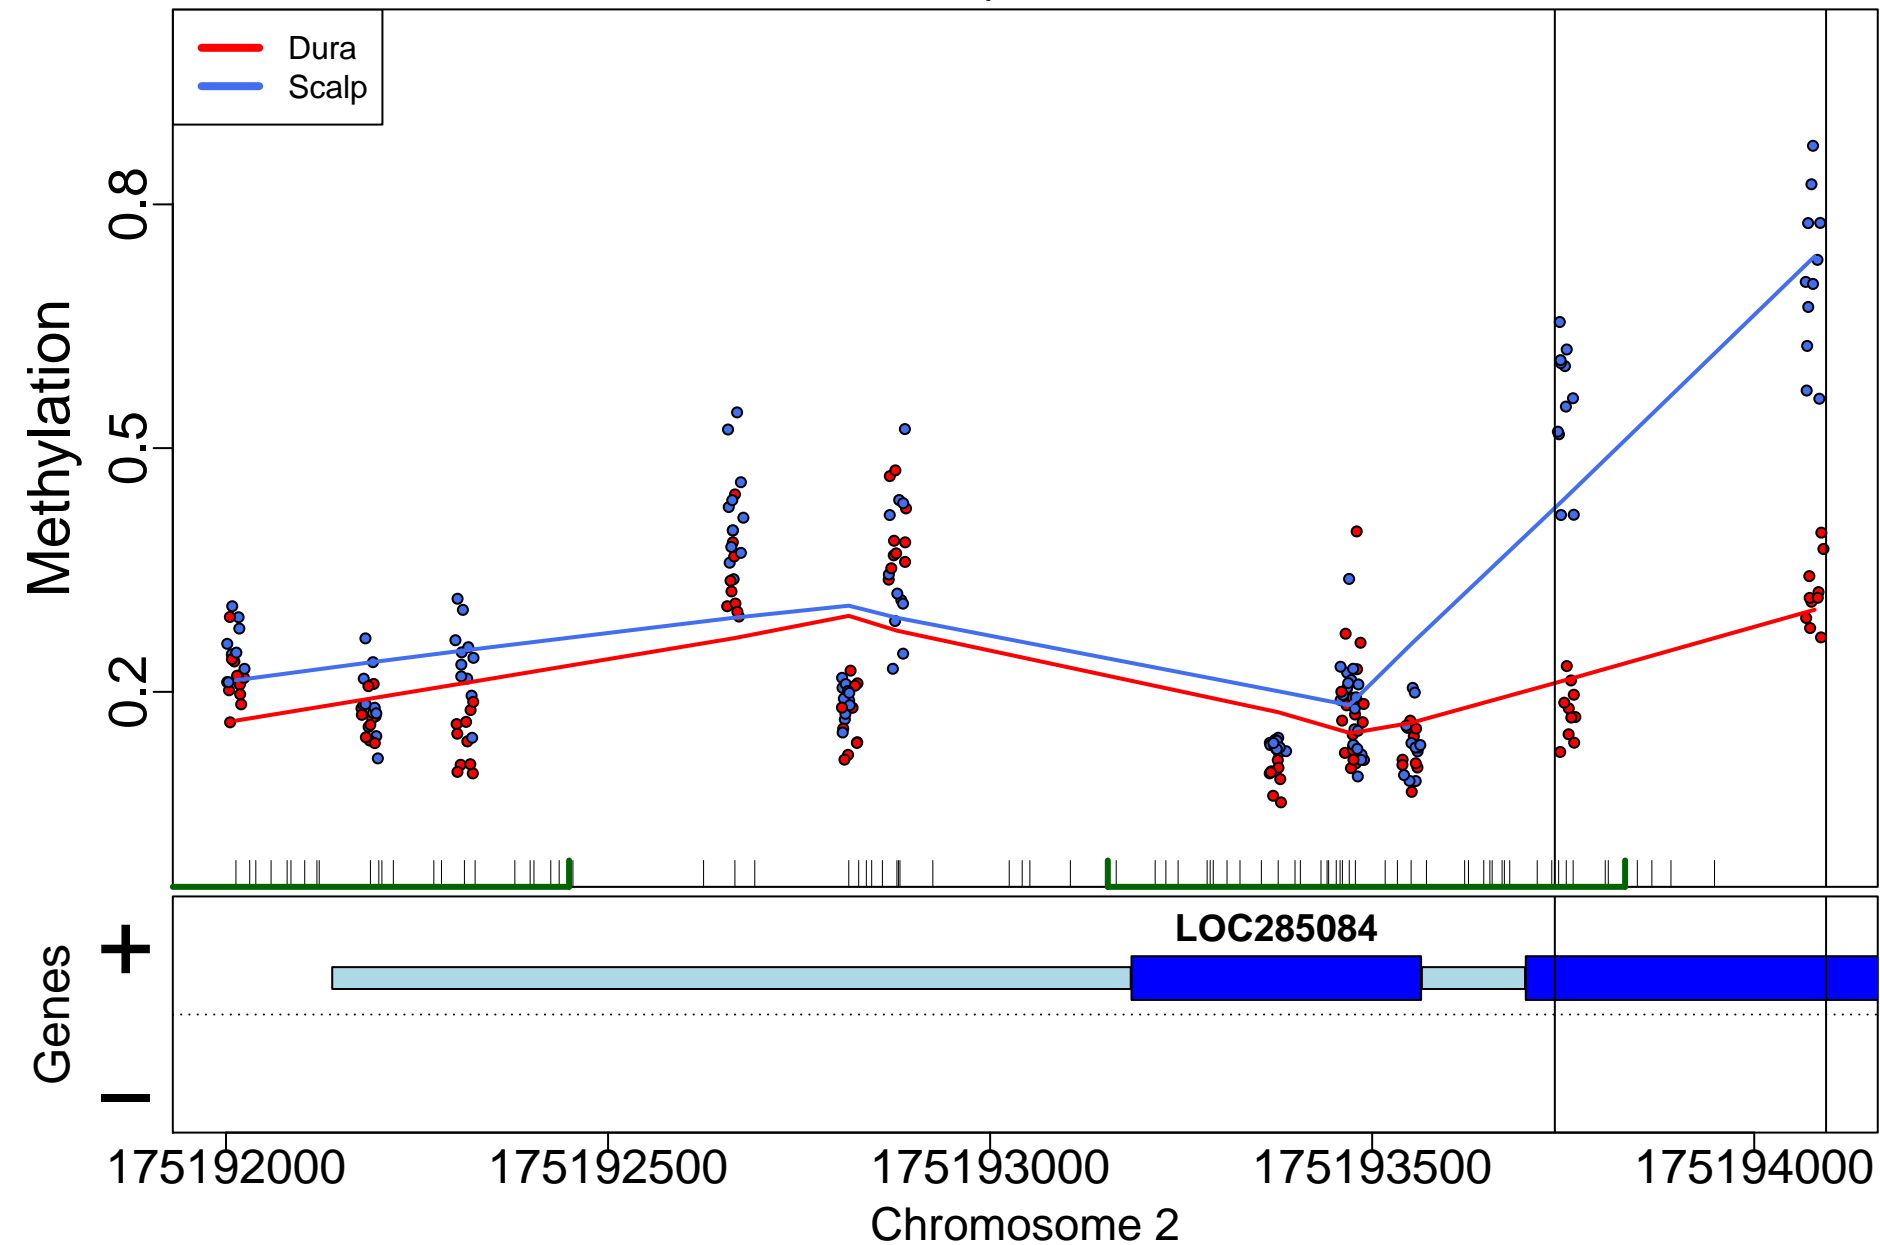

SPATA13; 0bp from tss:NA

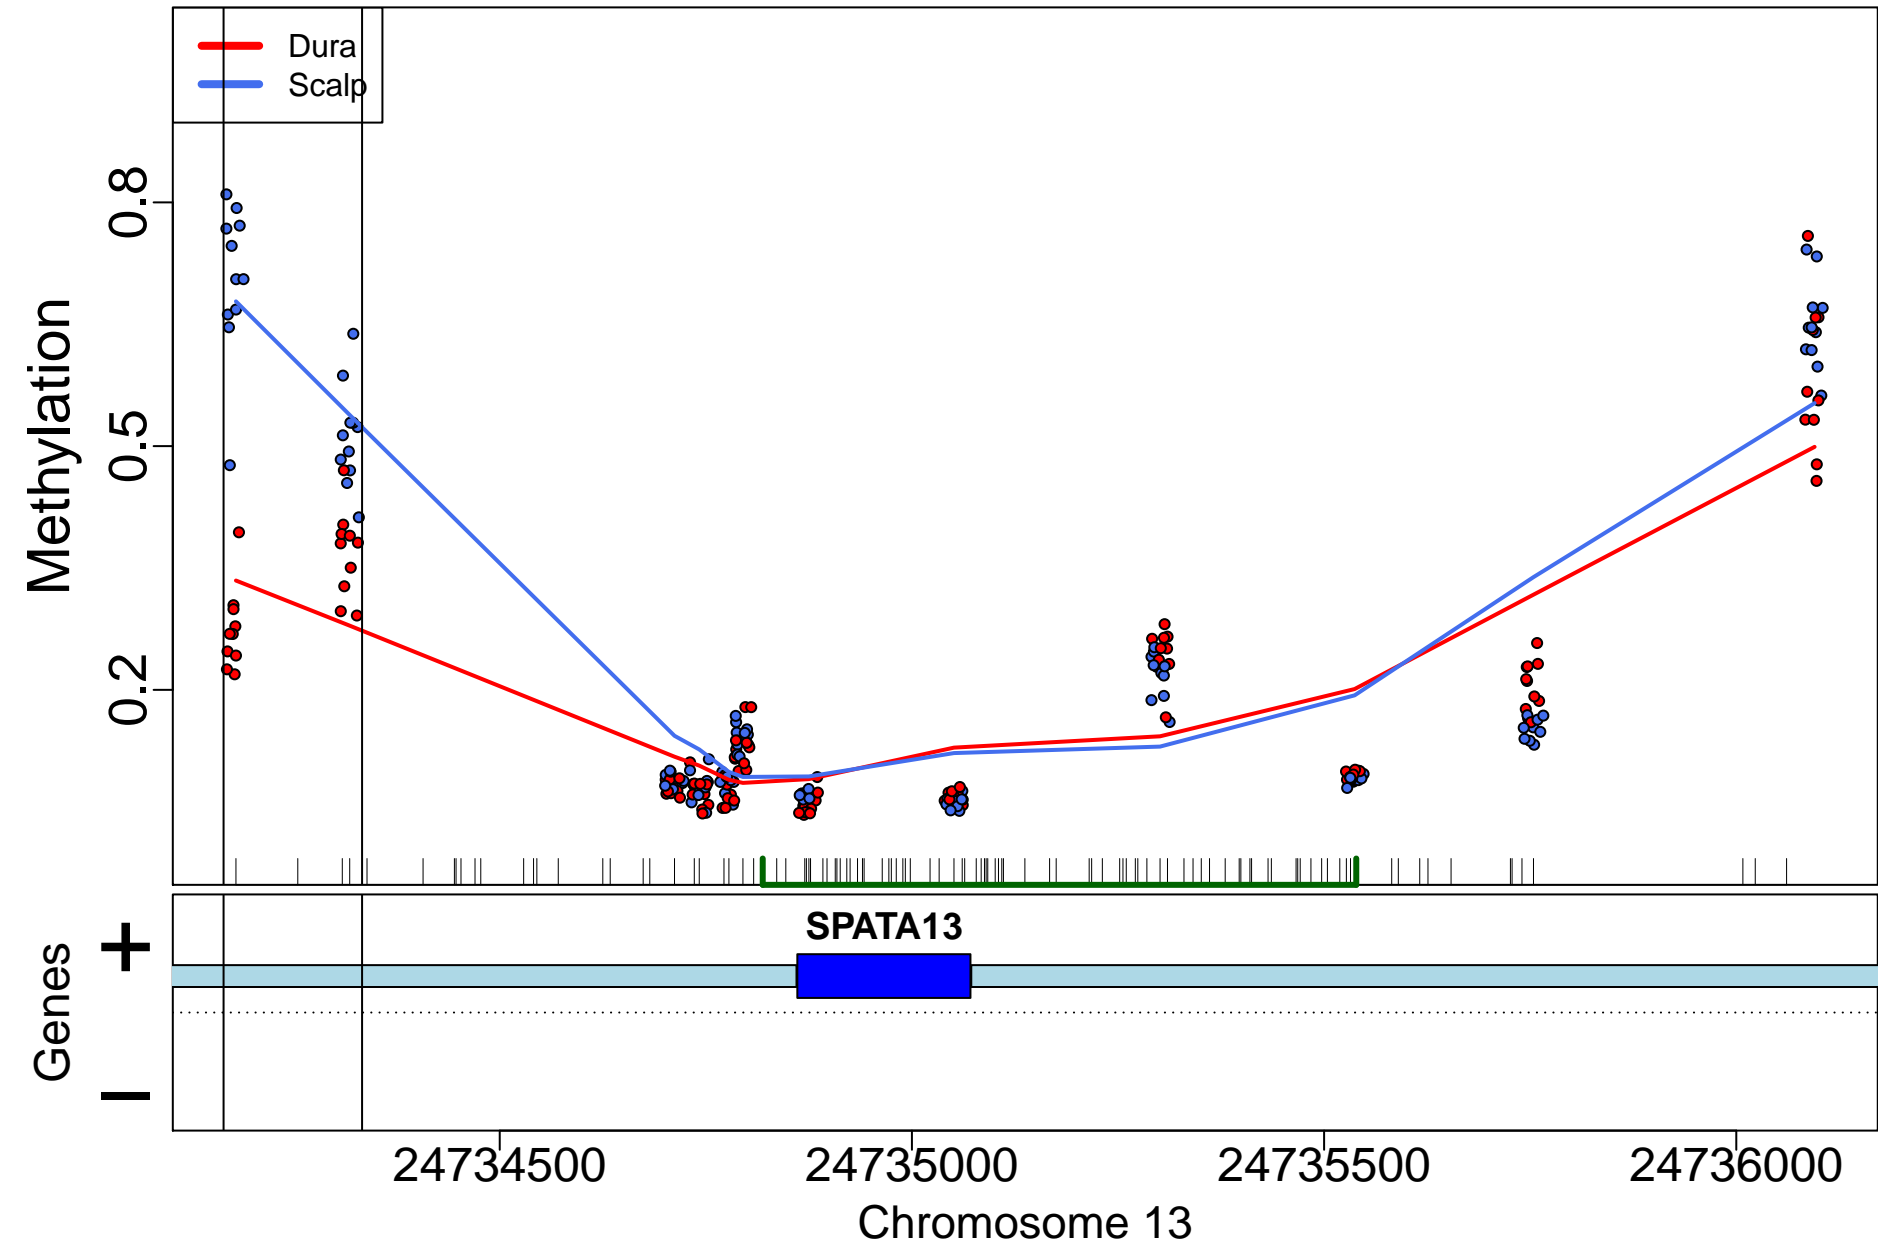

ANKLE2; 36185bp from tss:overlaps 3'

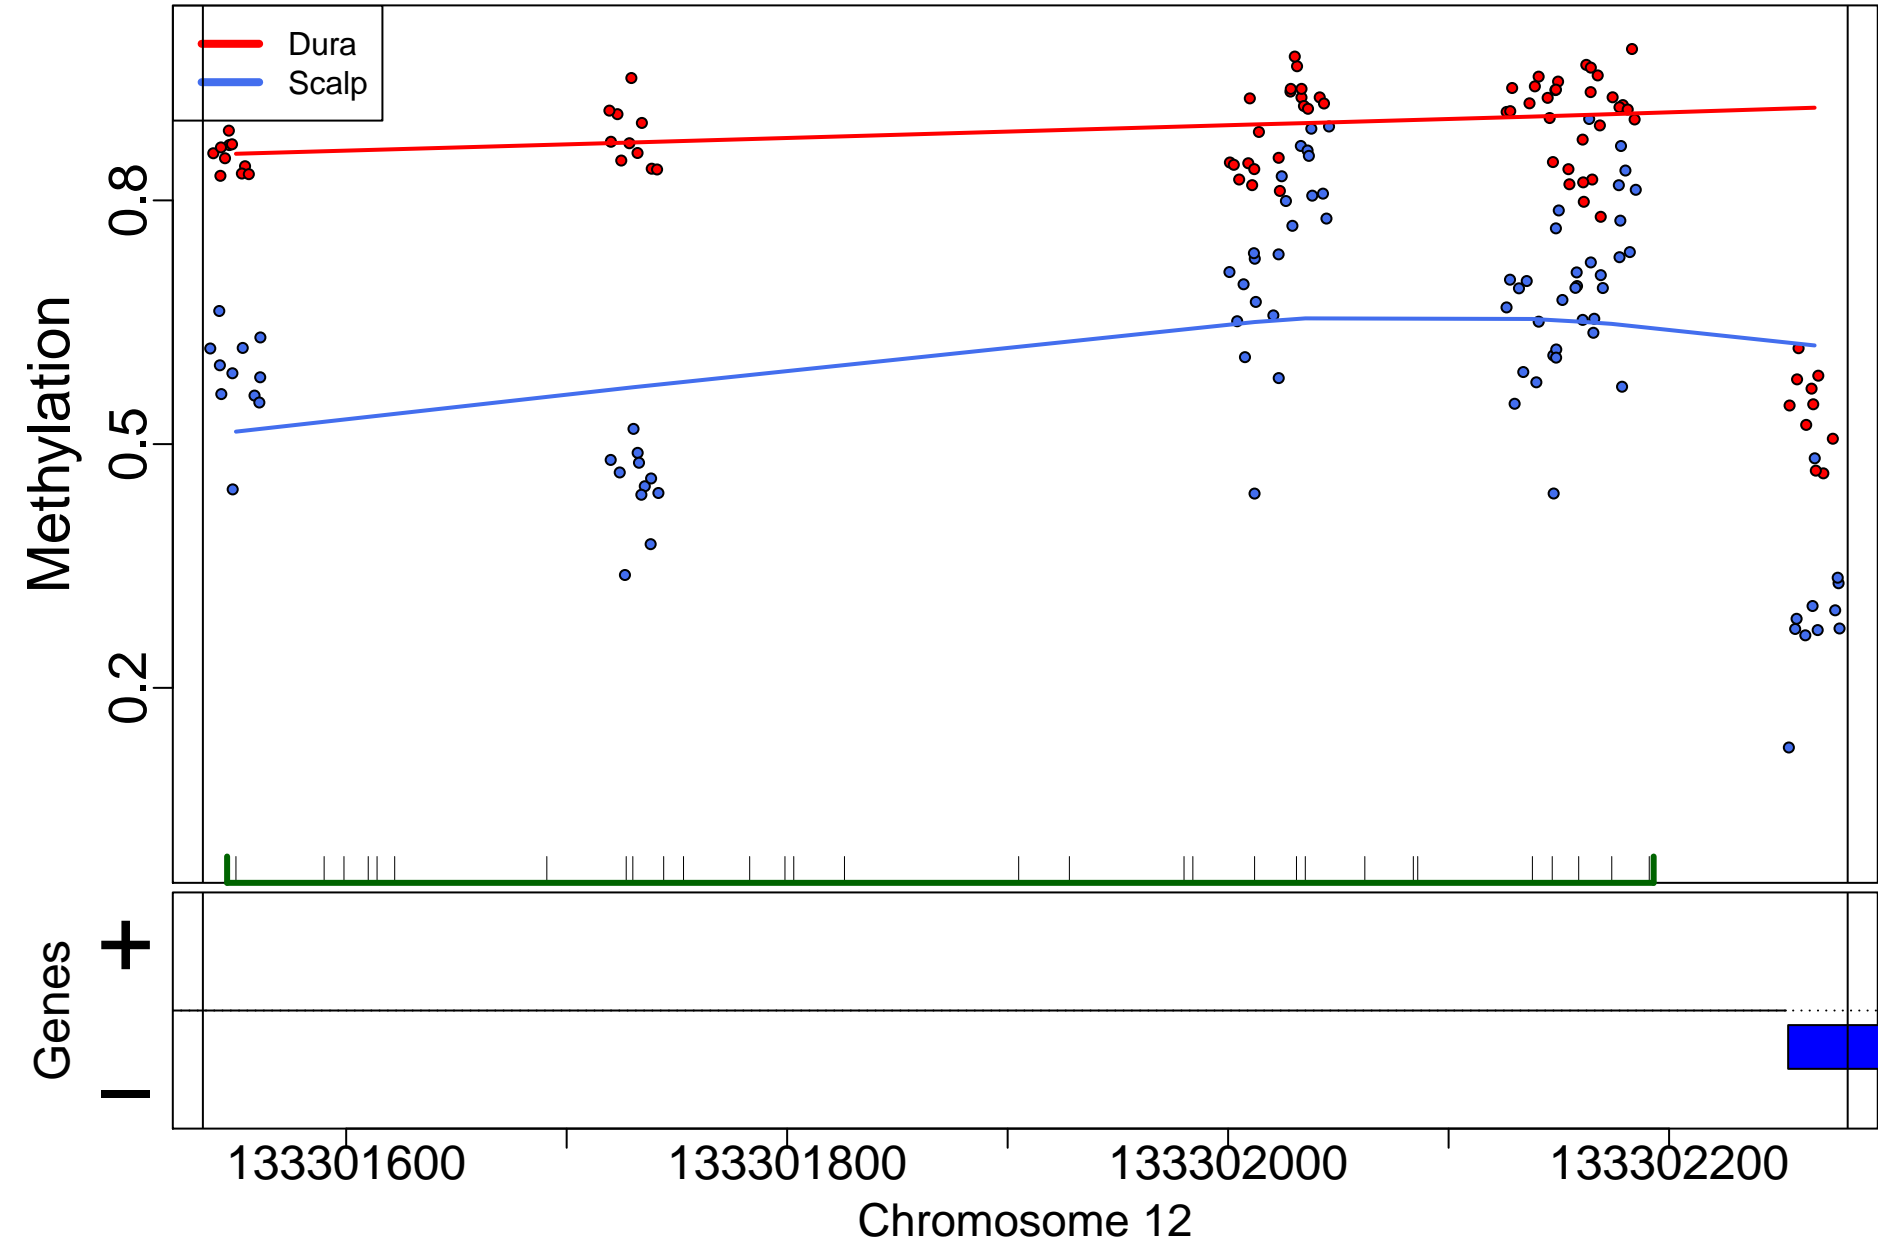

MEIS1; 142333bp from tss:downstream

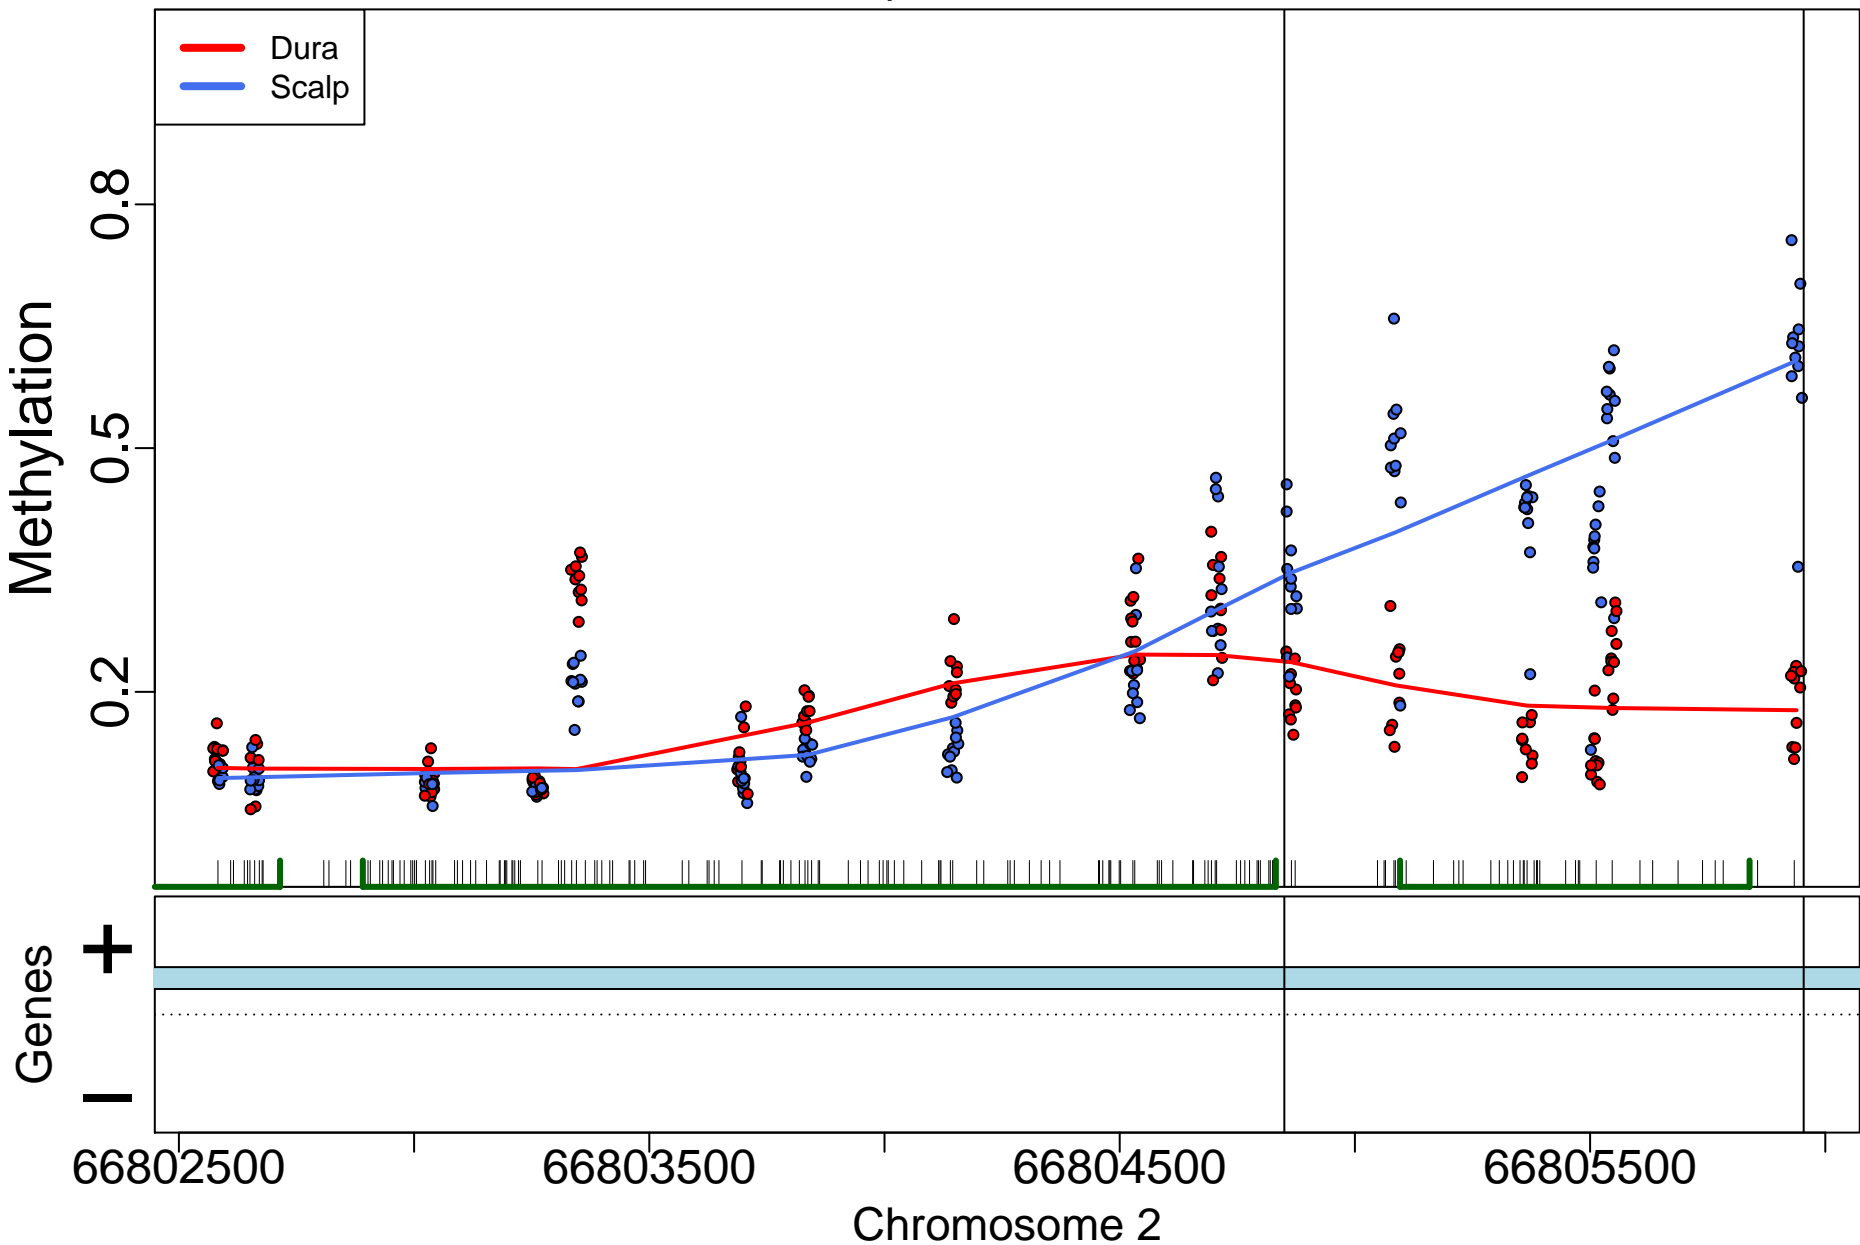



RUNX2; 91203bp from tss:inside intron

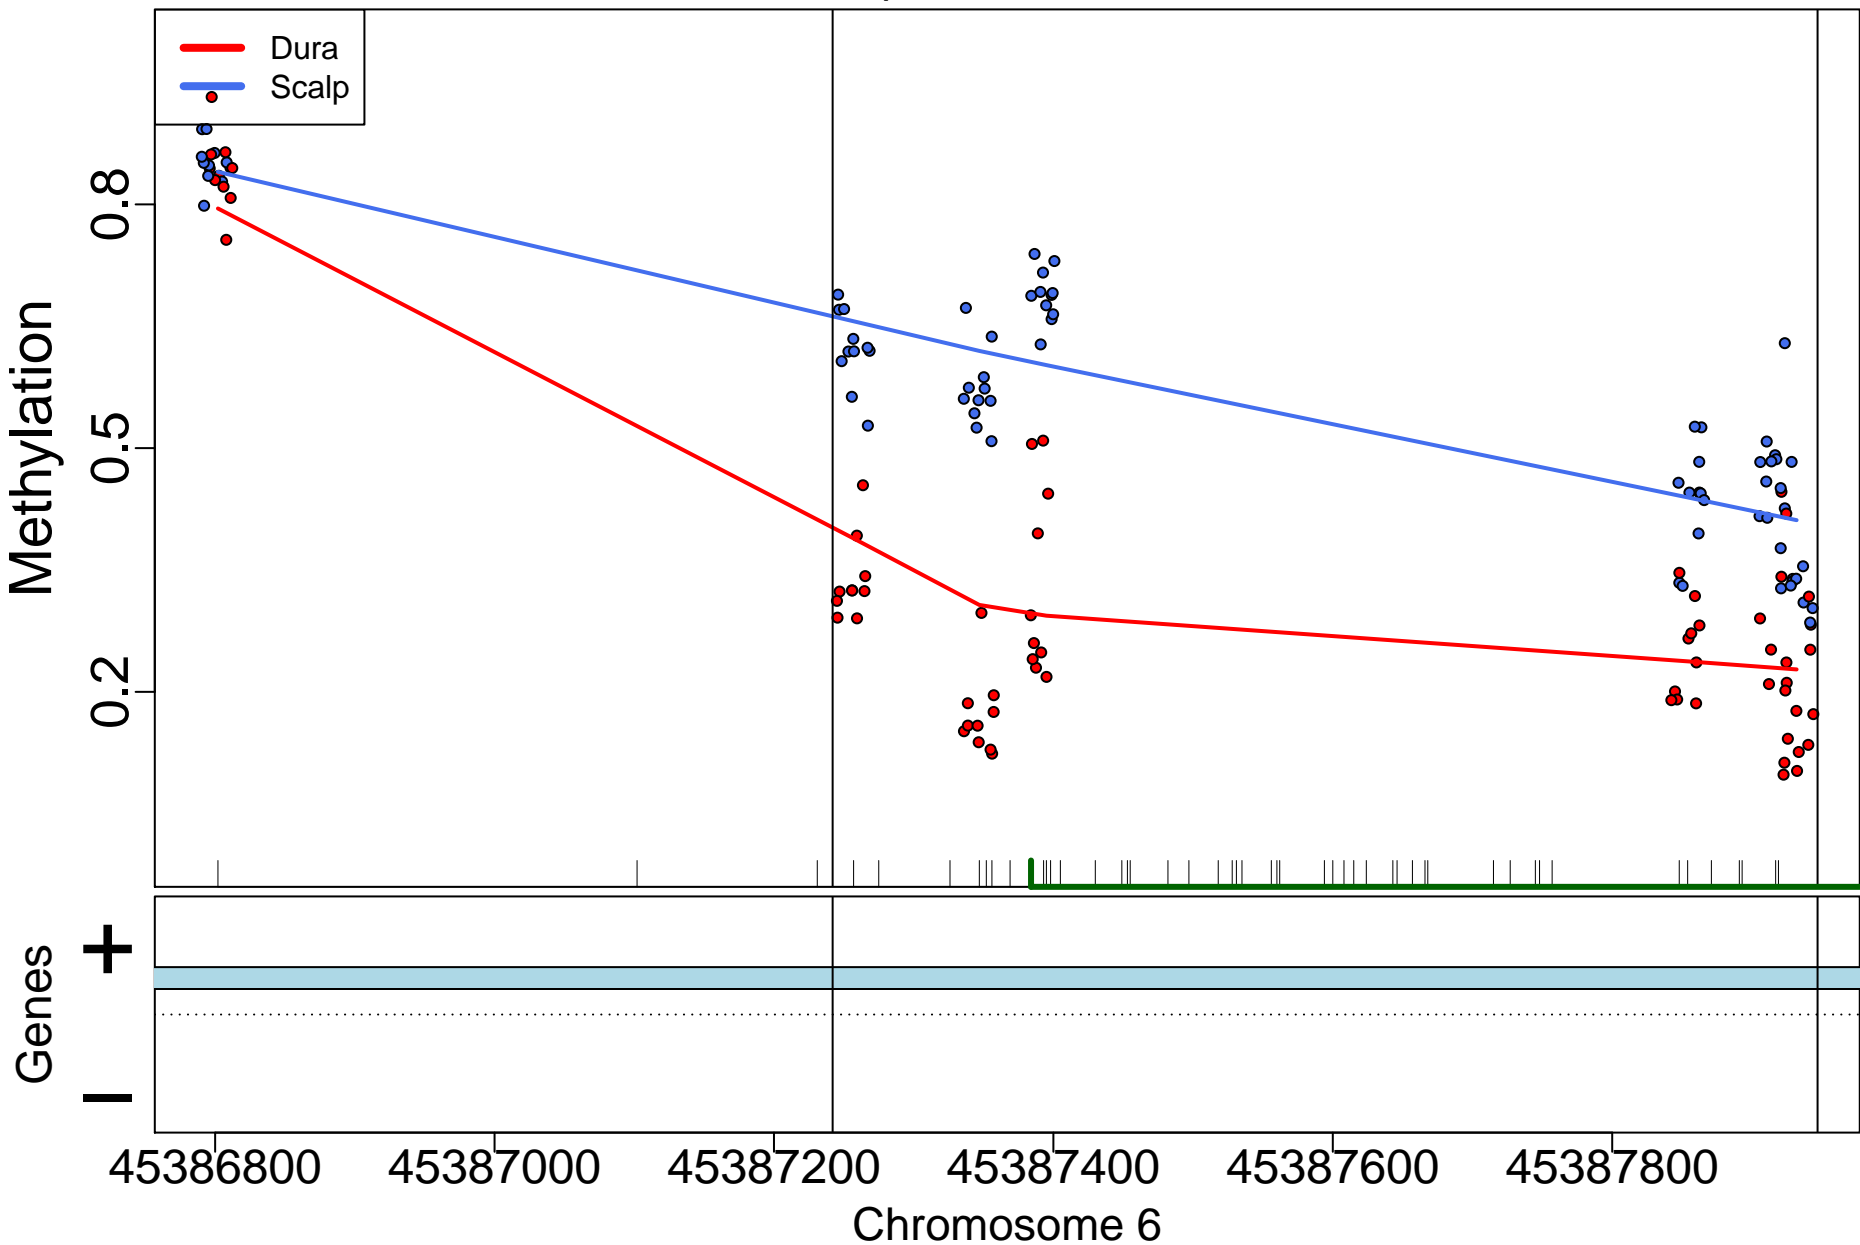

# RNF8; 411bp from tss:promoter

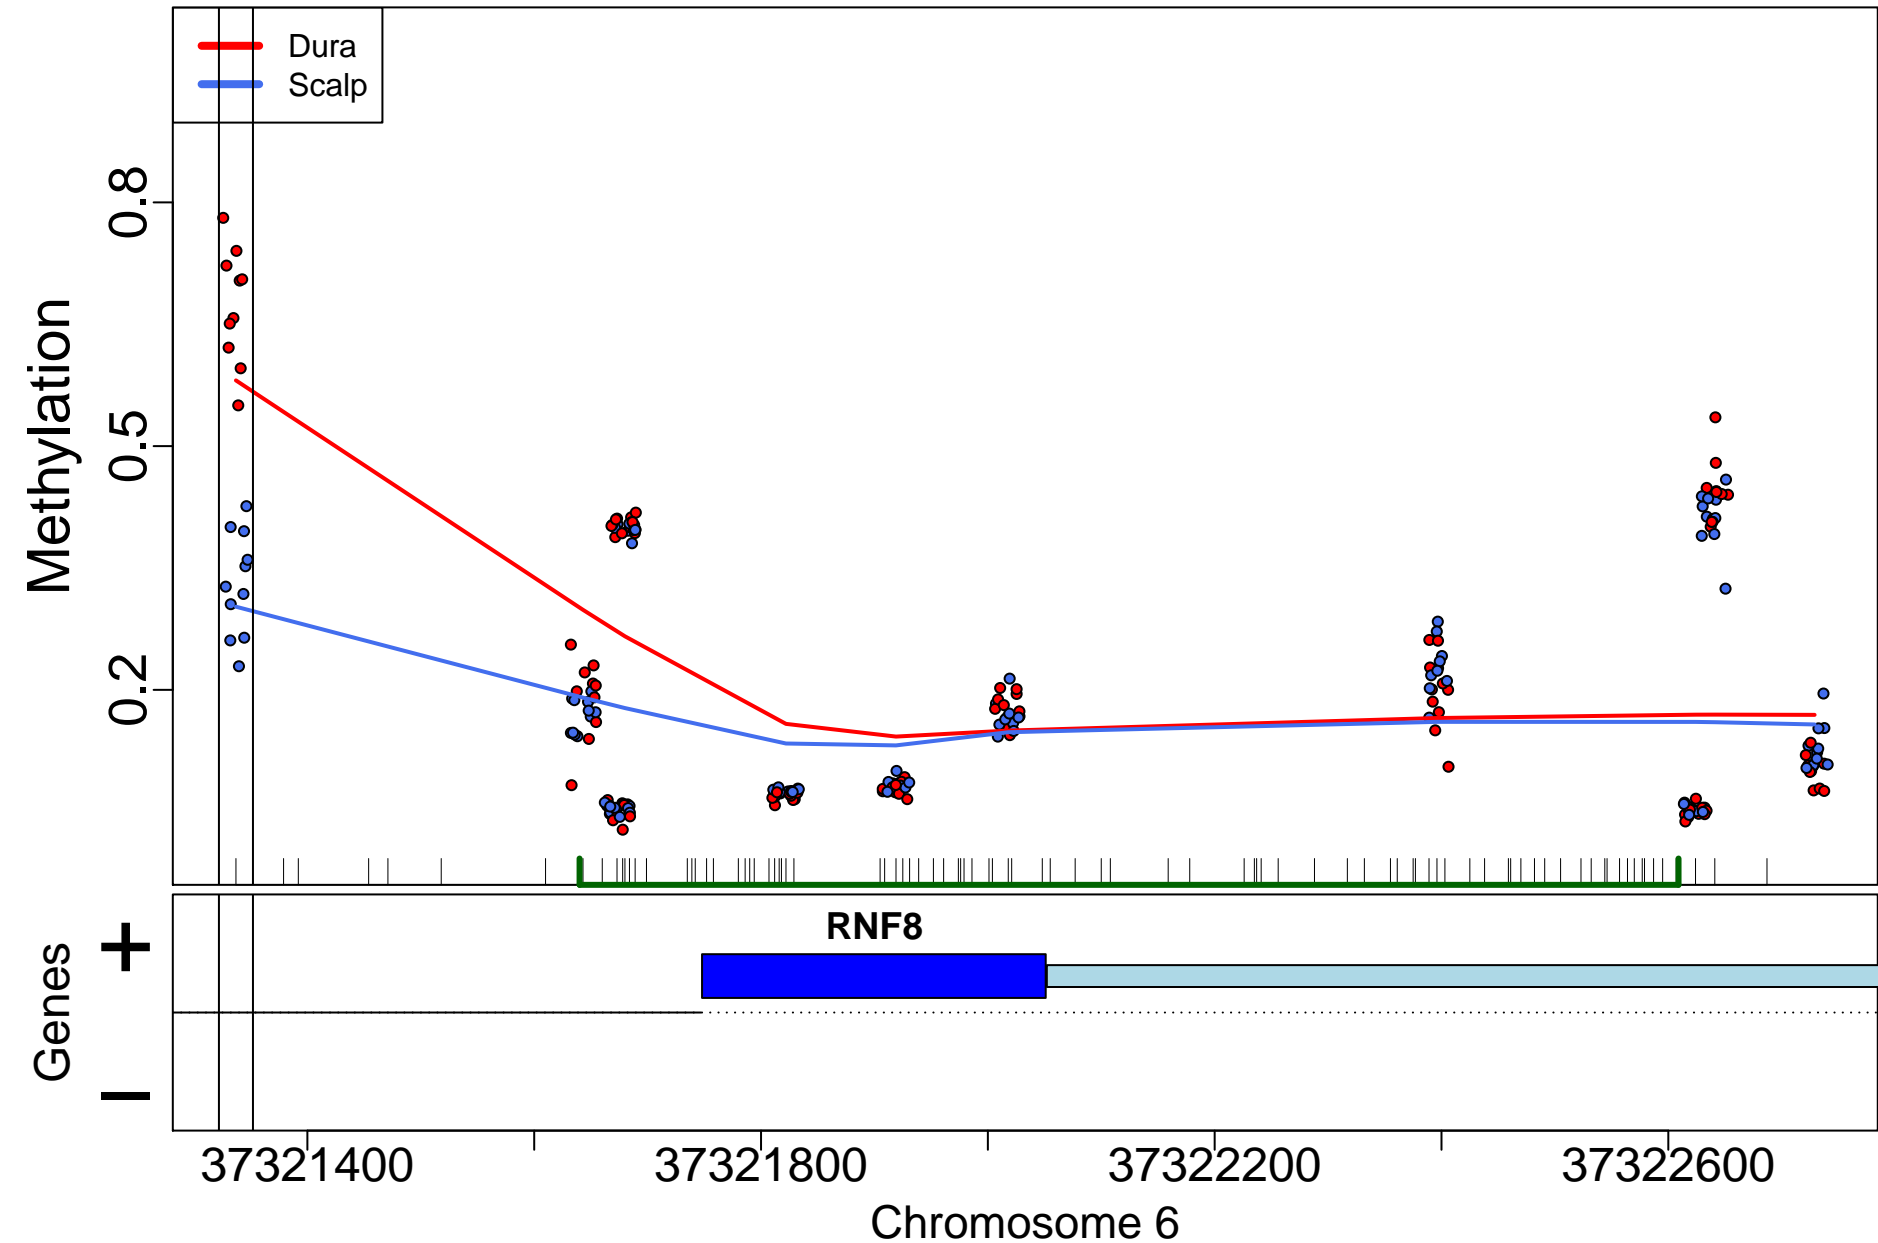

CD9; 1262bp from tss:inside intron

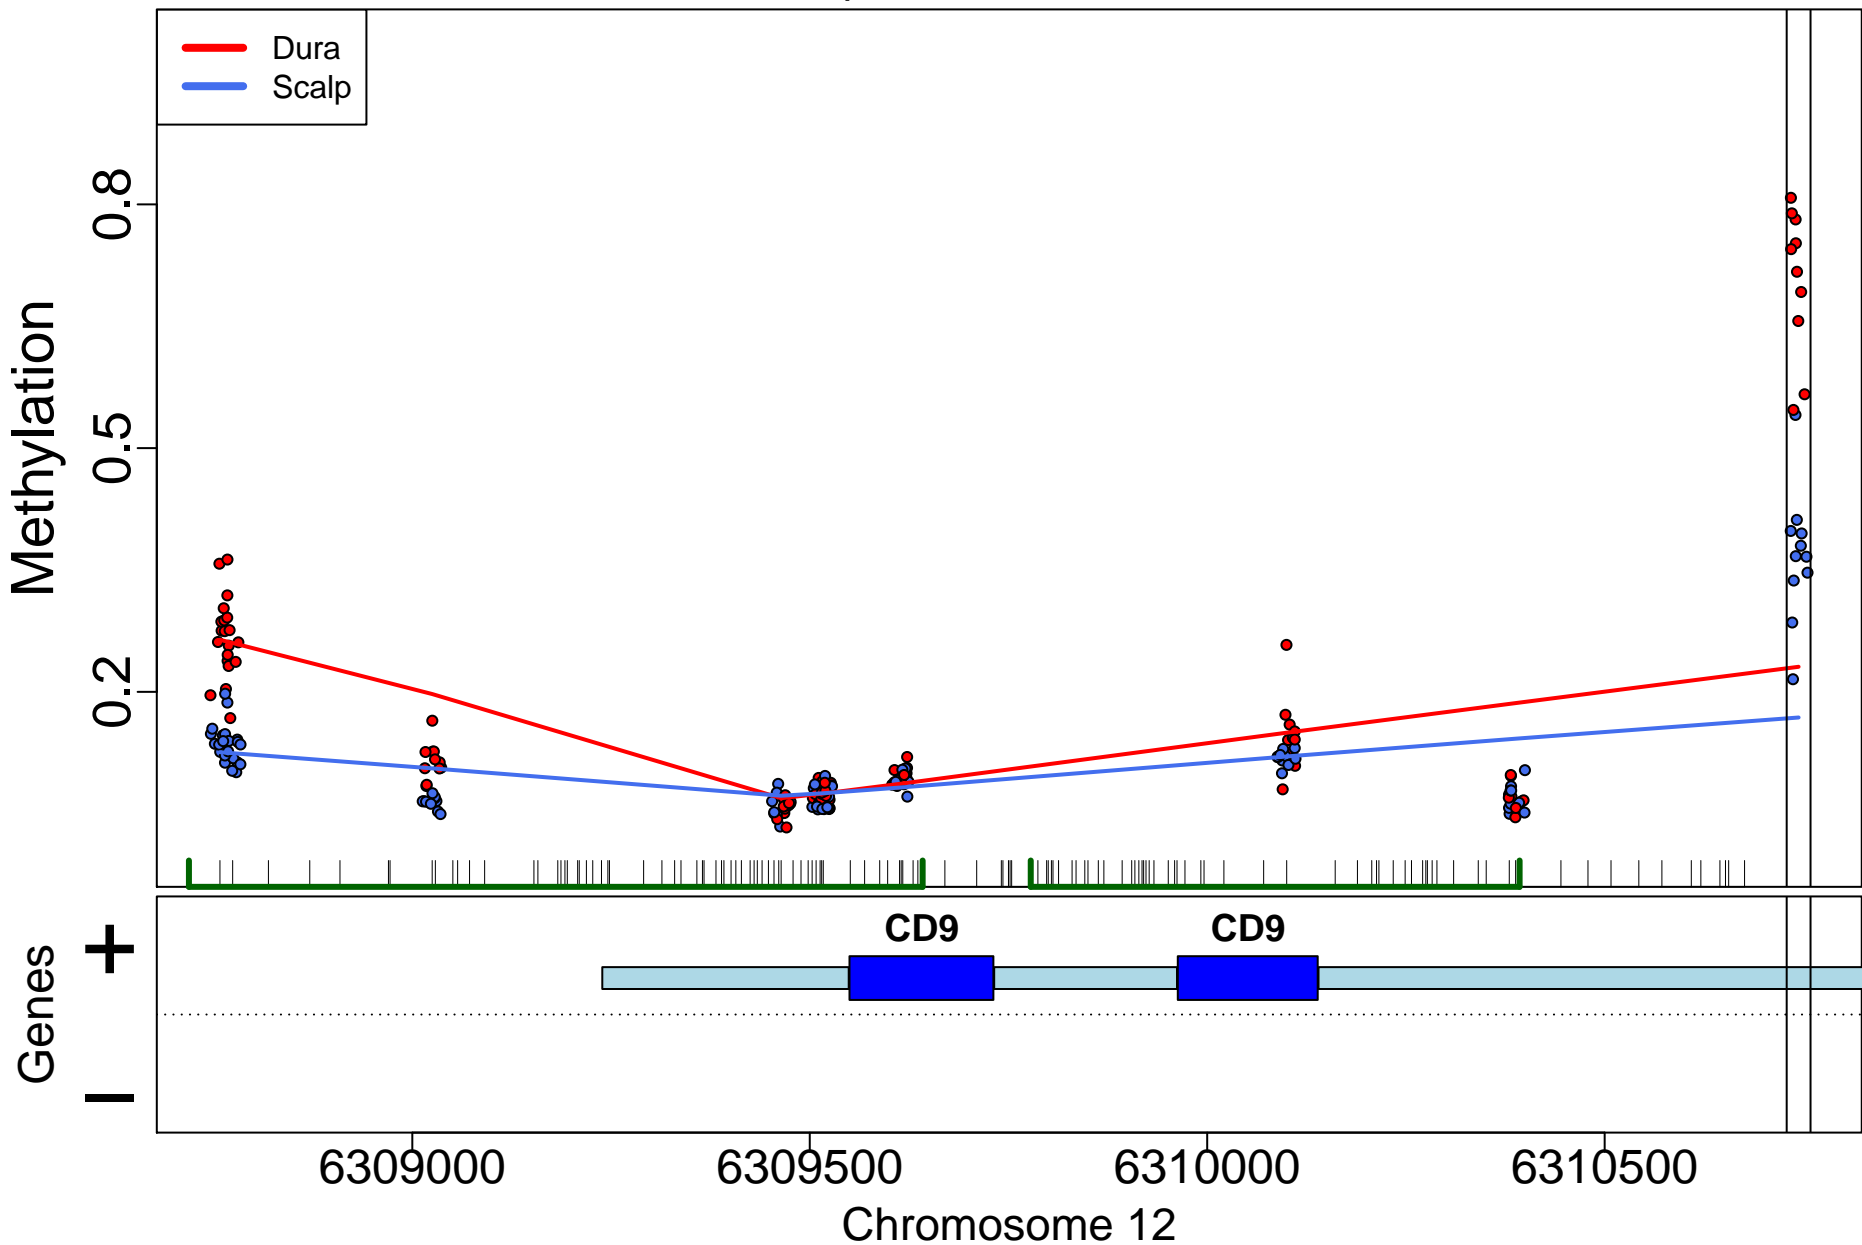

KCNMB1; 0bp from tss:overlaps 5'

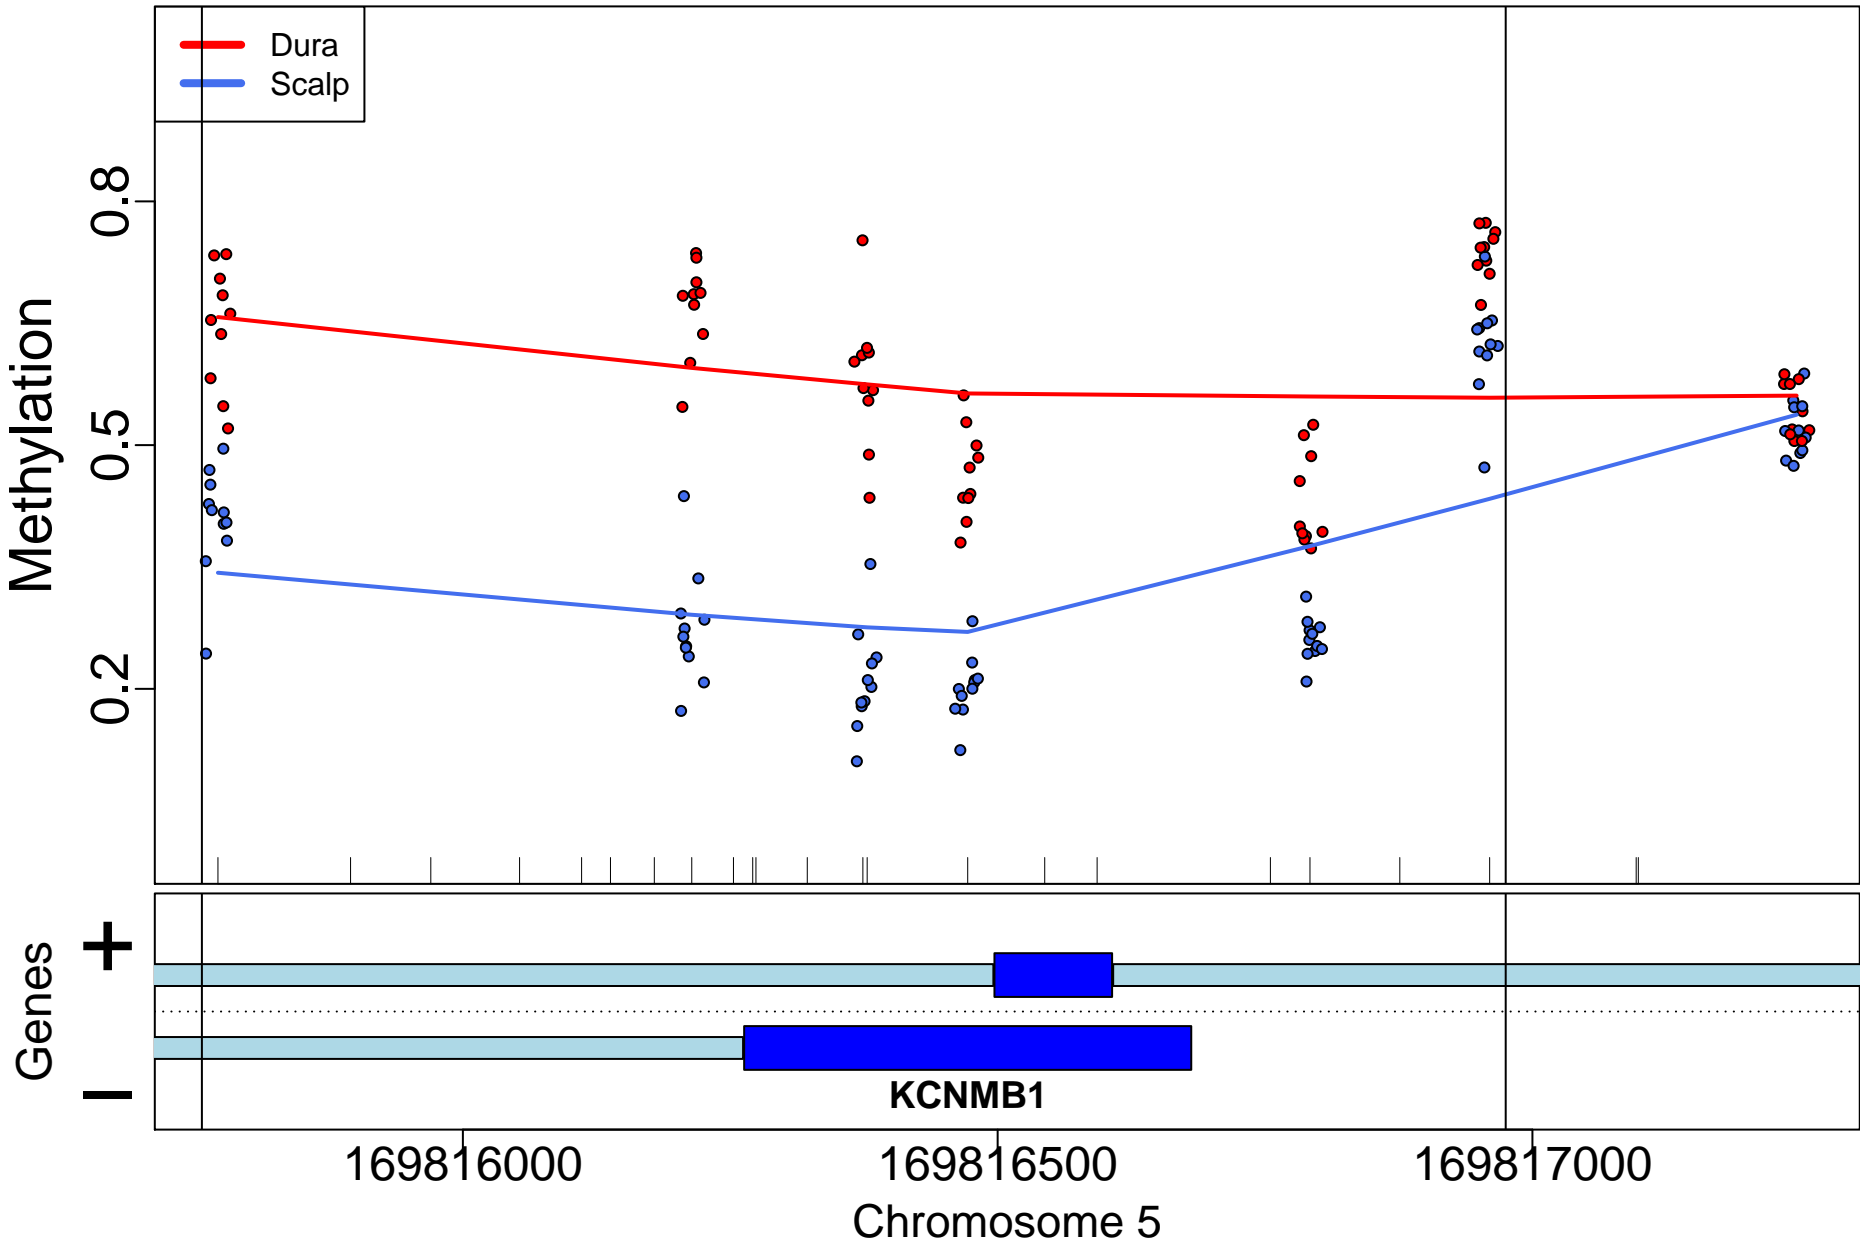



COCH; 314bp from tss:promoter

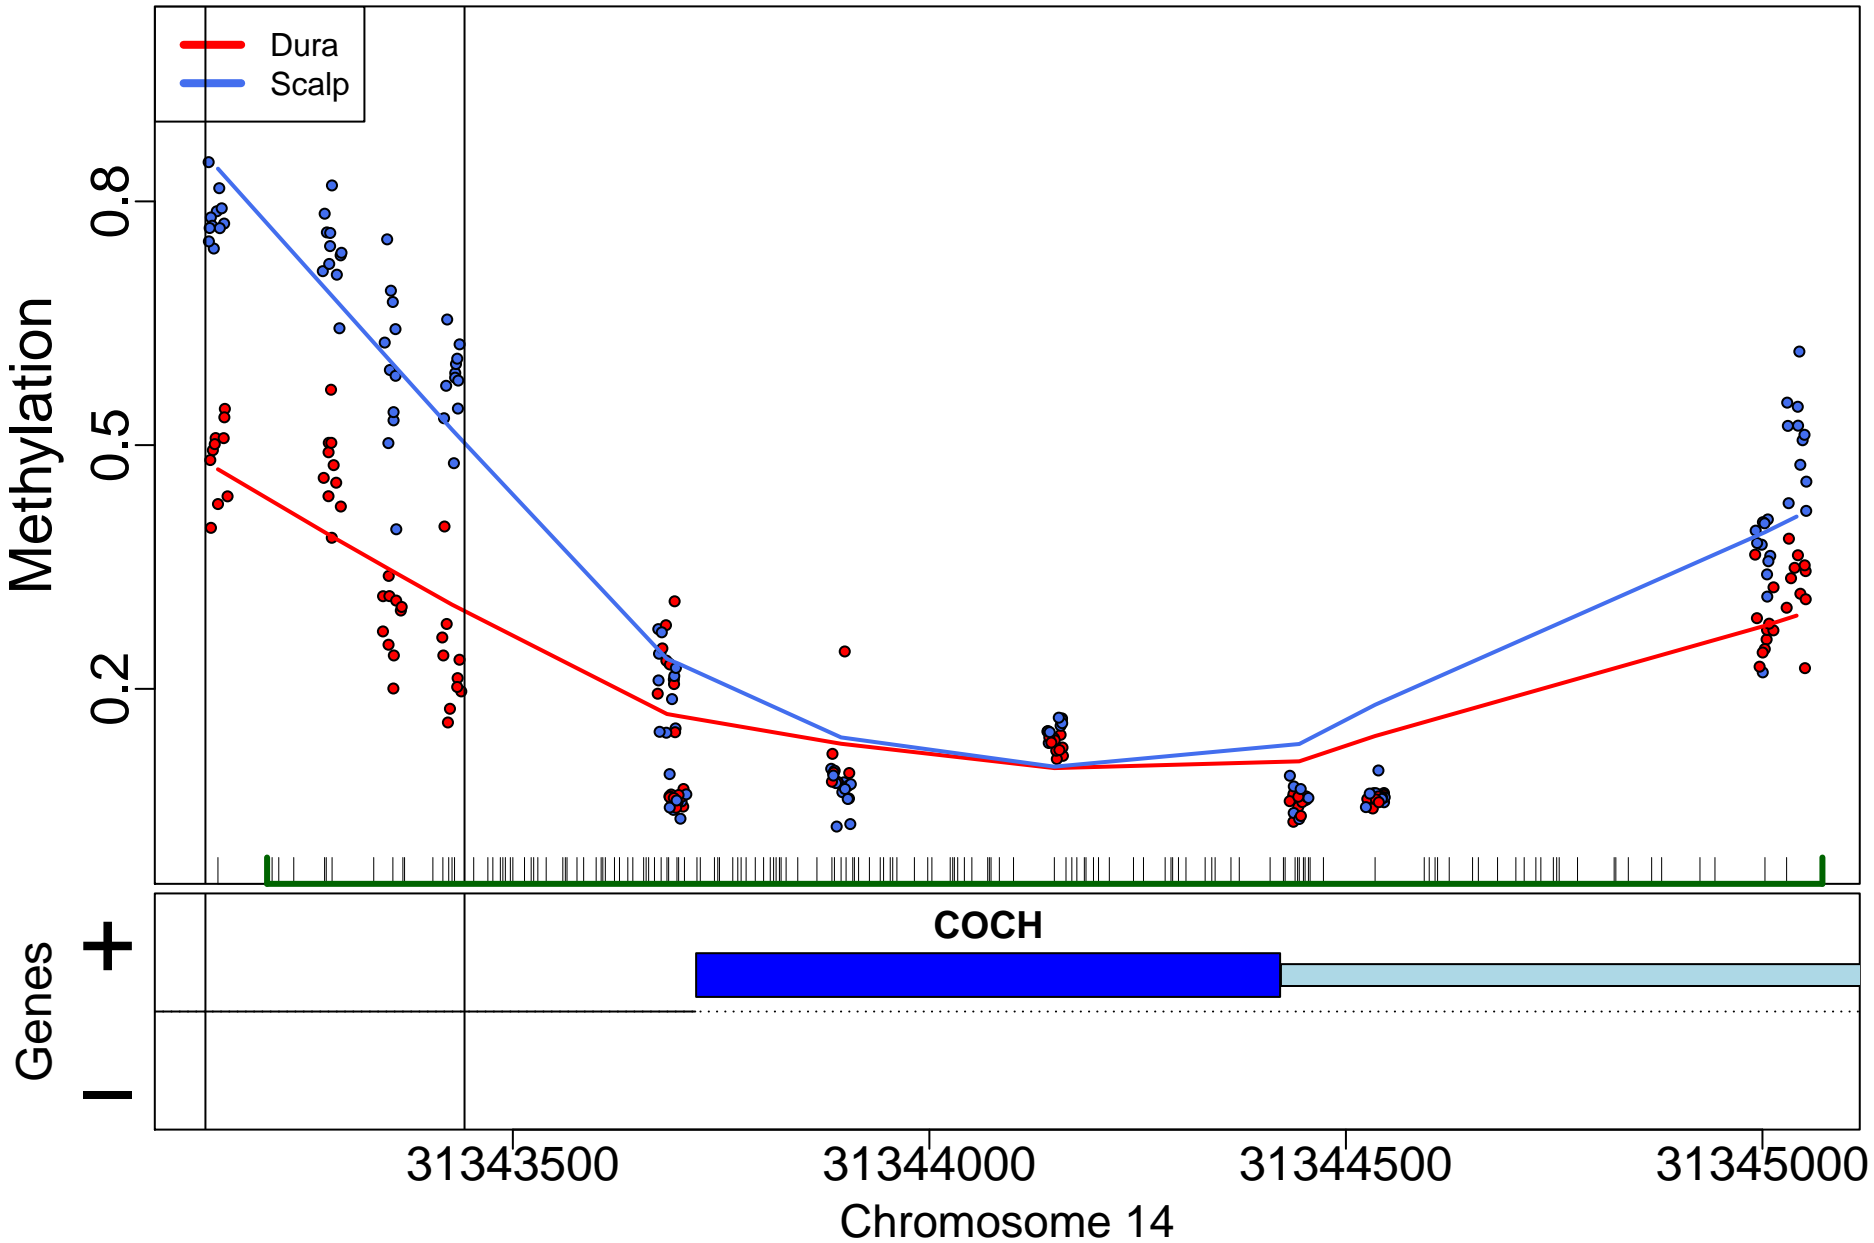

THBS2; 94741bp from tss:downstream

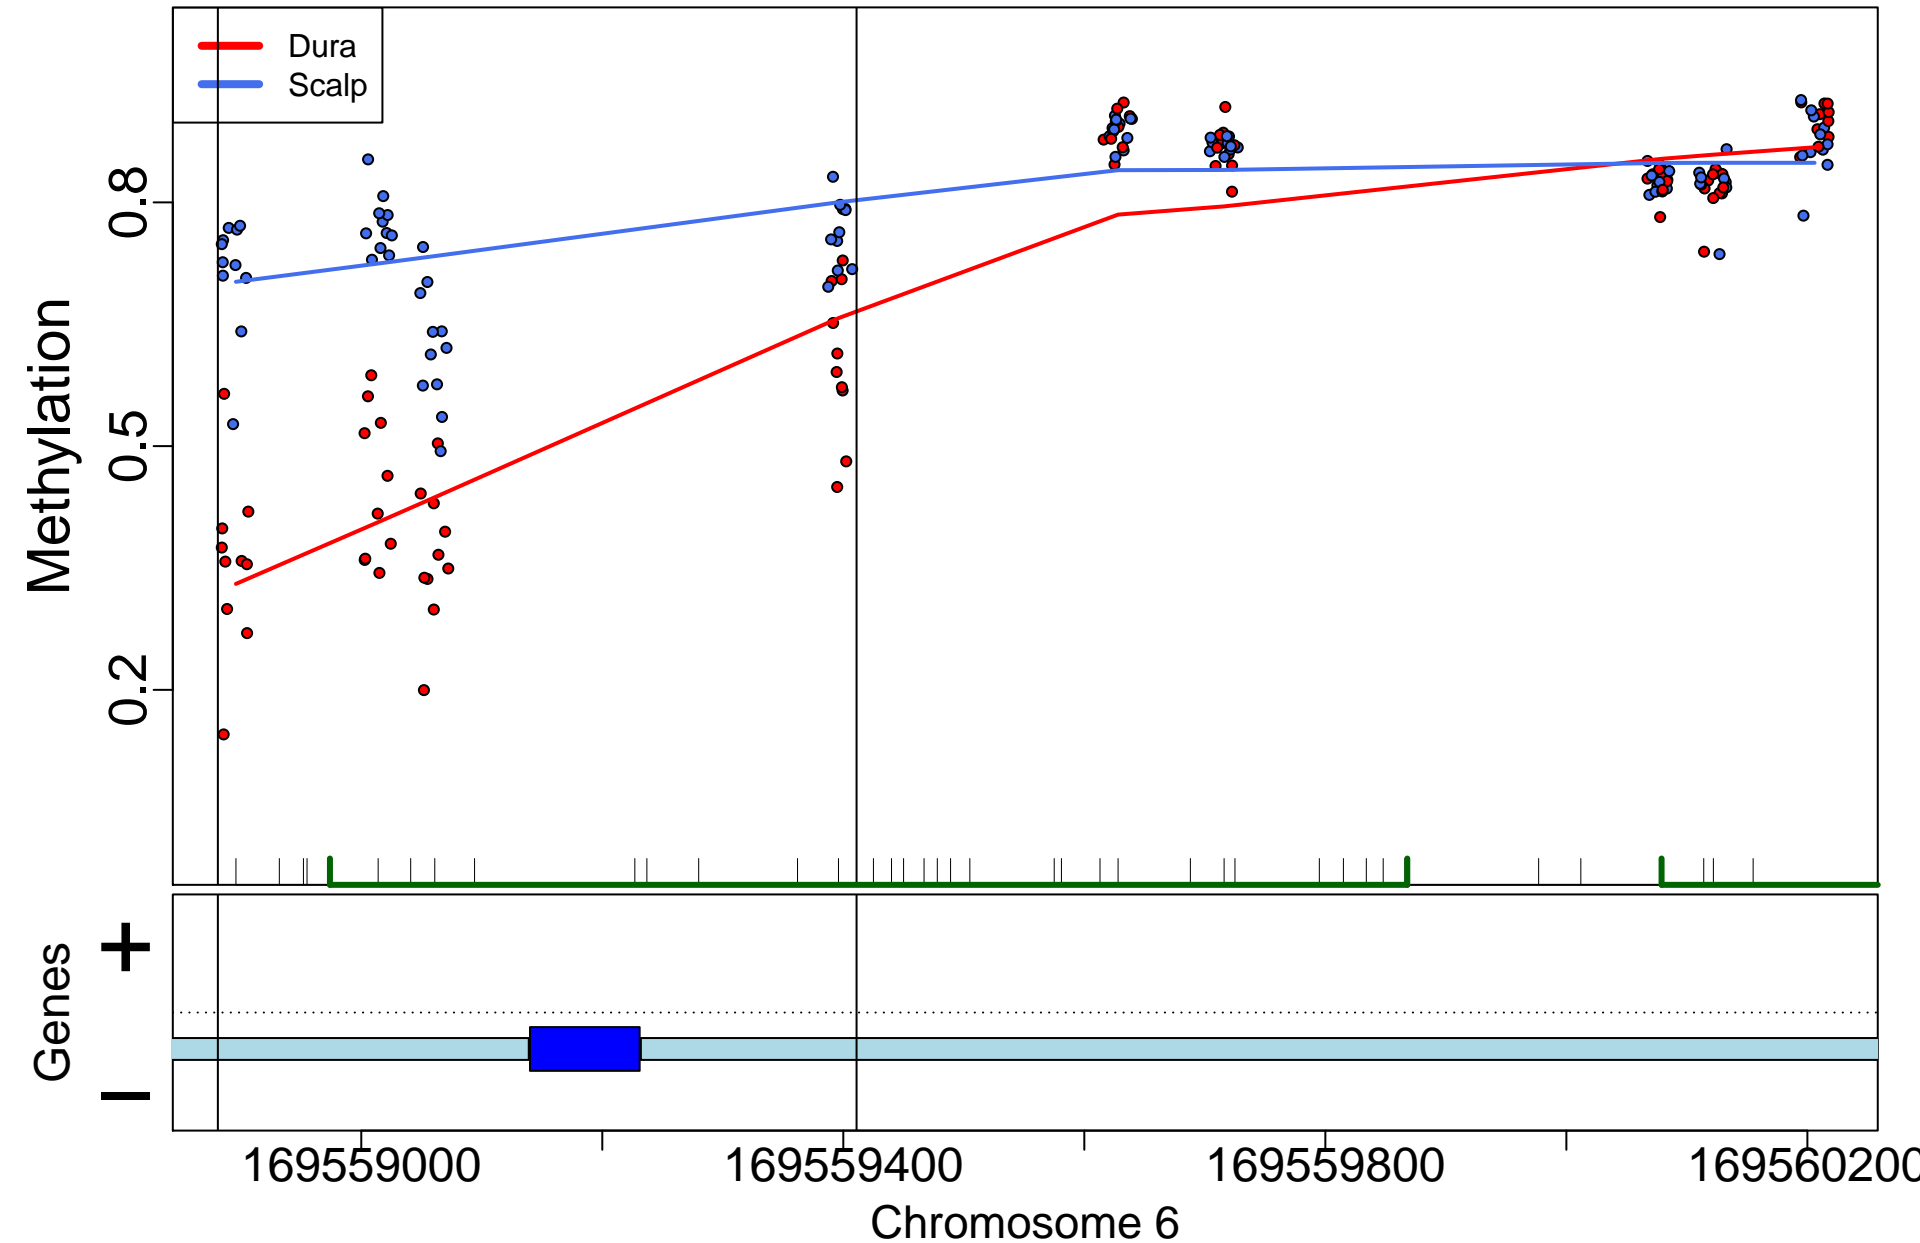

# LINC00313; 0bp from tss:NA

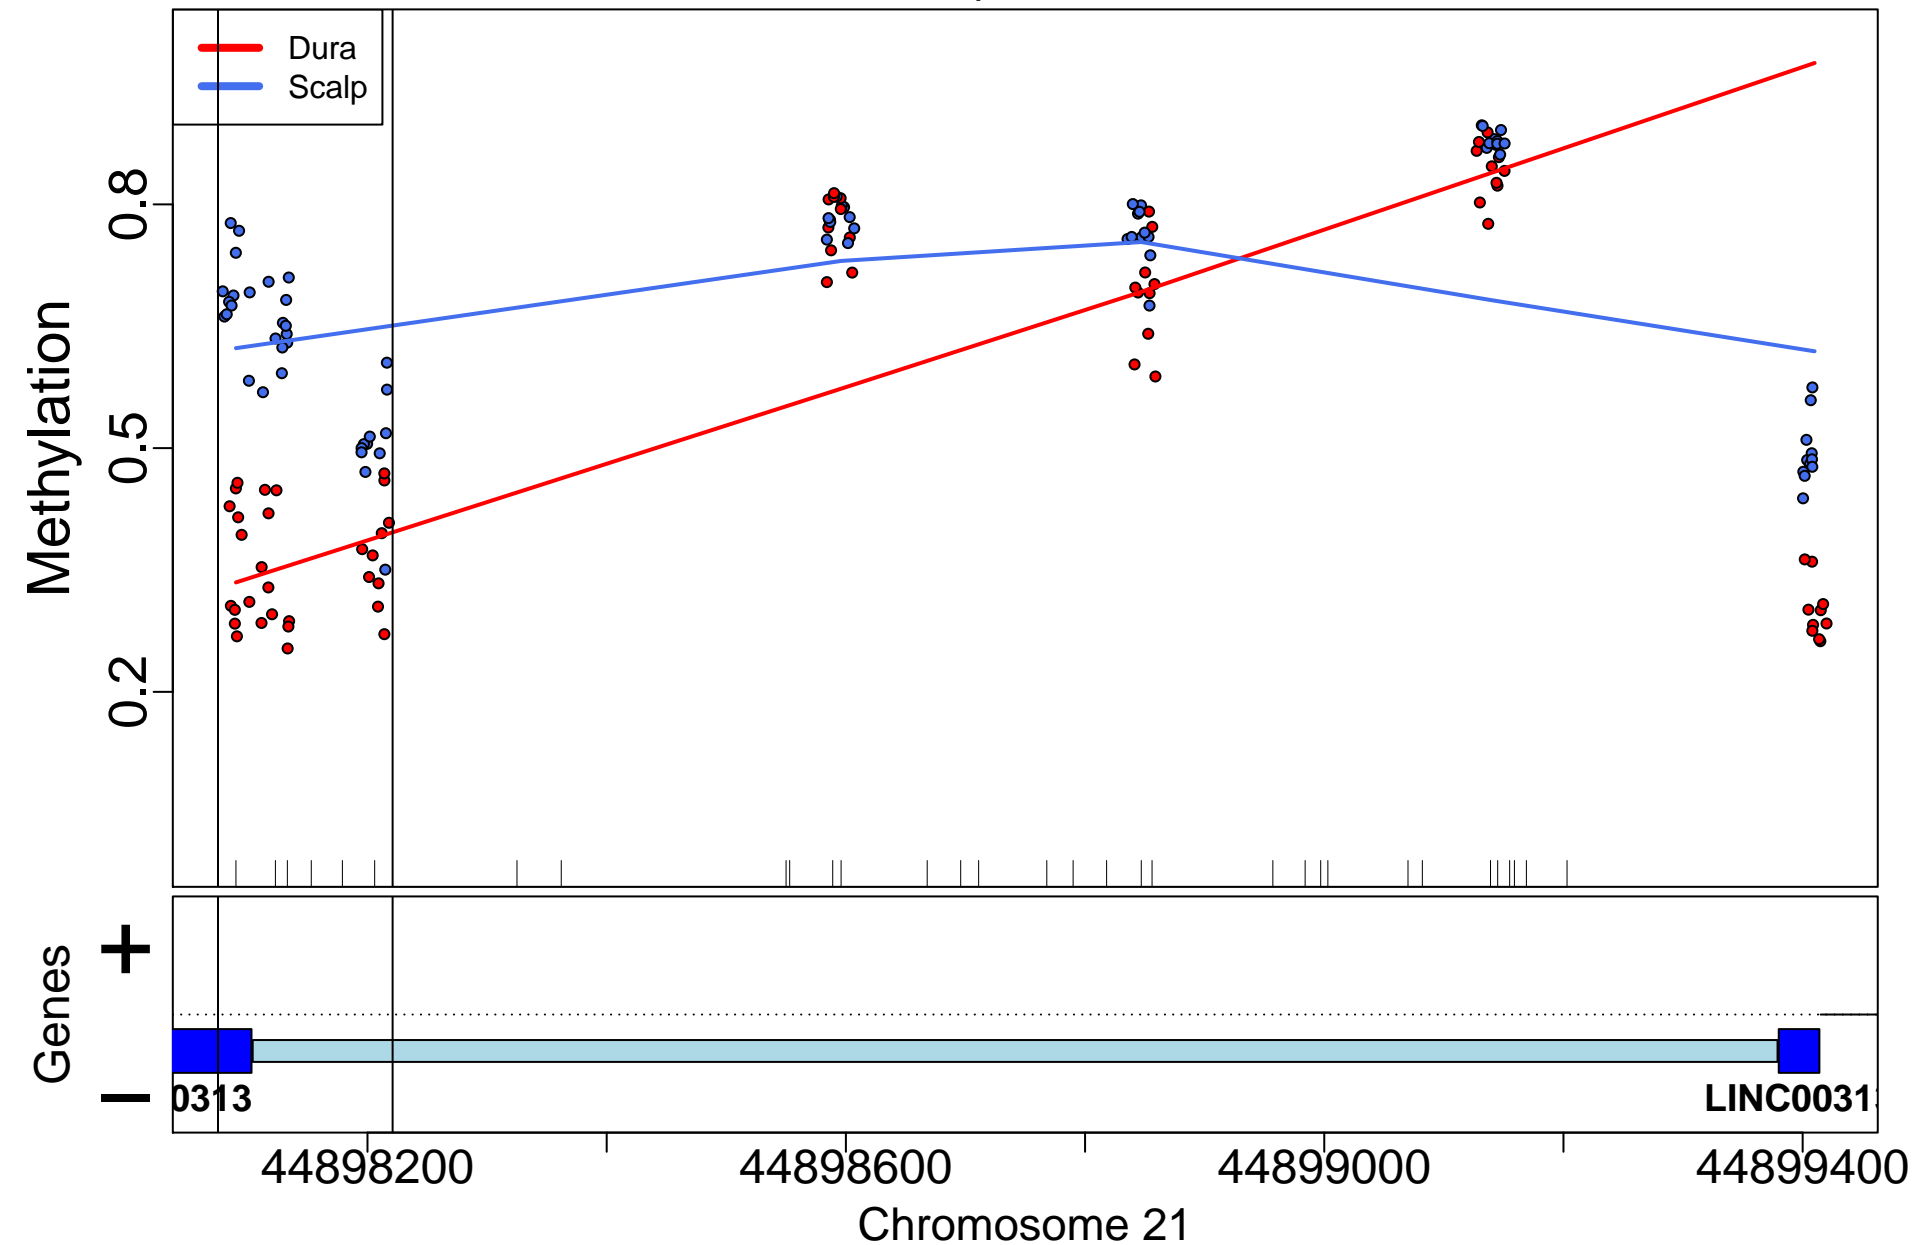



IRS1; 355bp from tss:inside exon

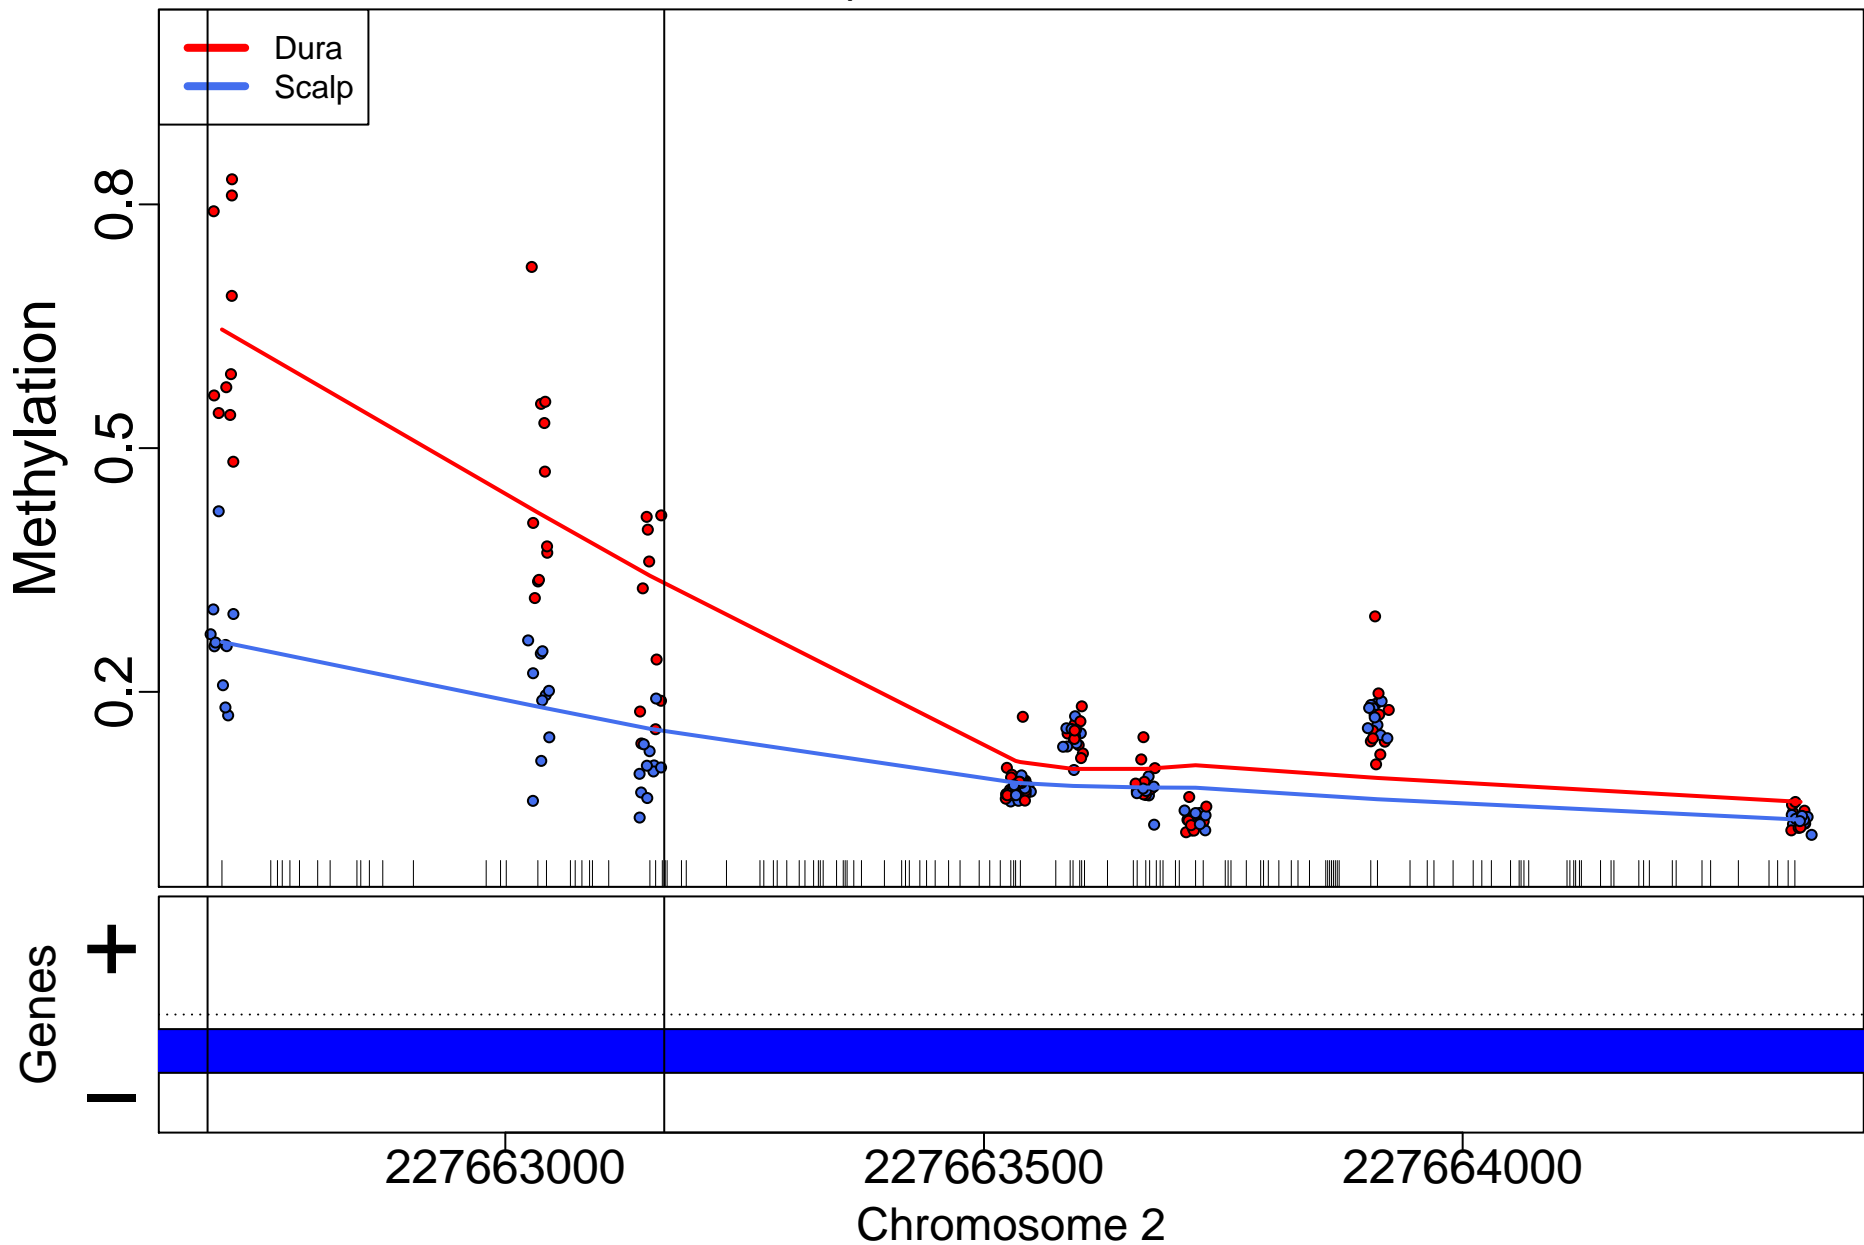

IRF8; 78841bp from tss:downstream

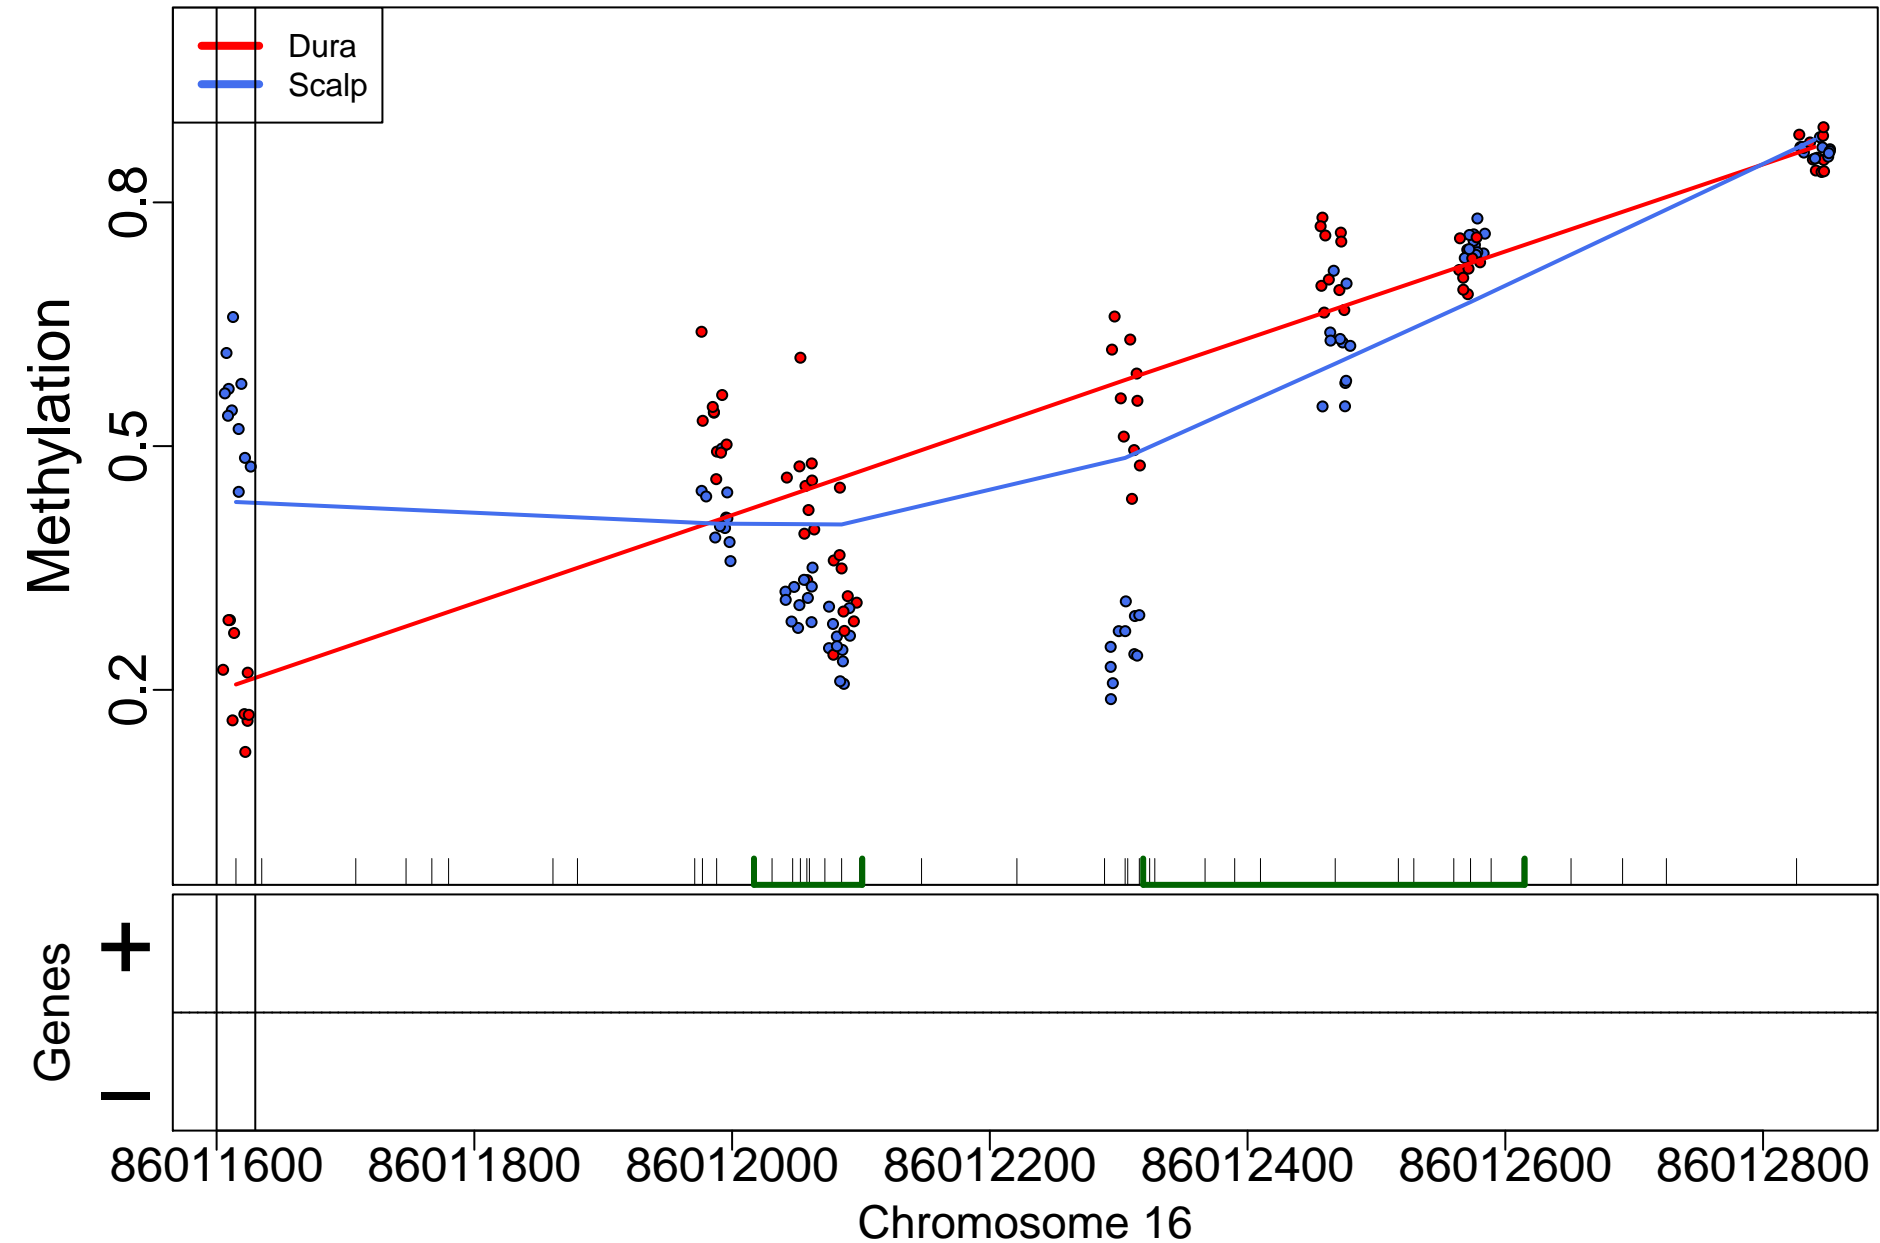

C7orf49; 22412bp from tss:inside intron

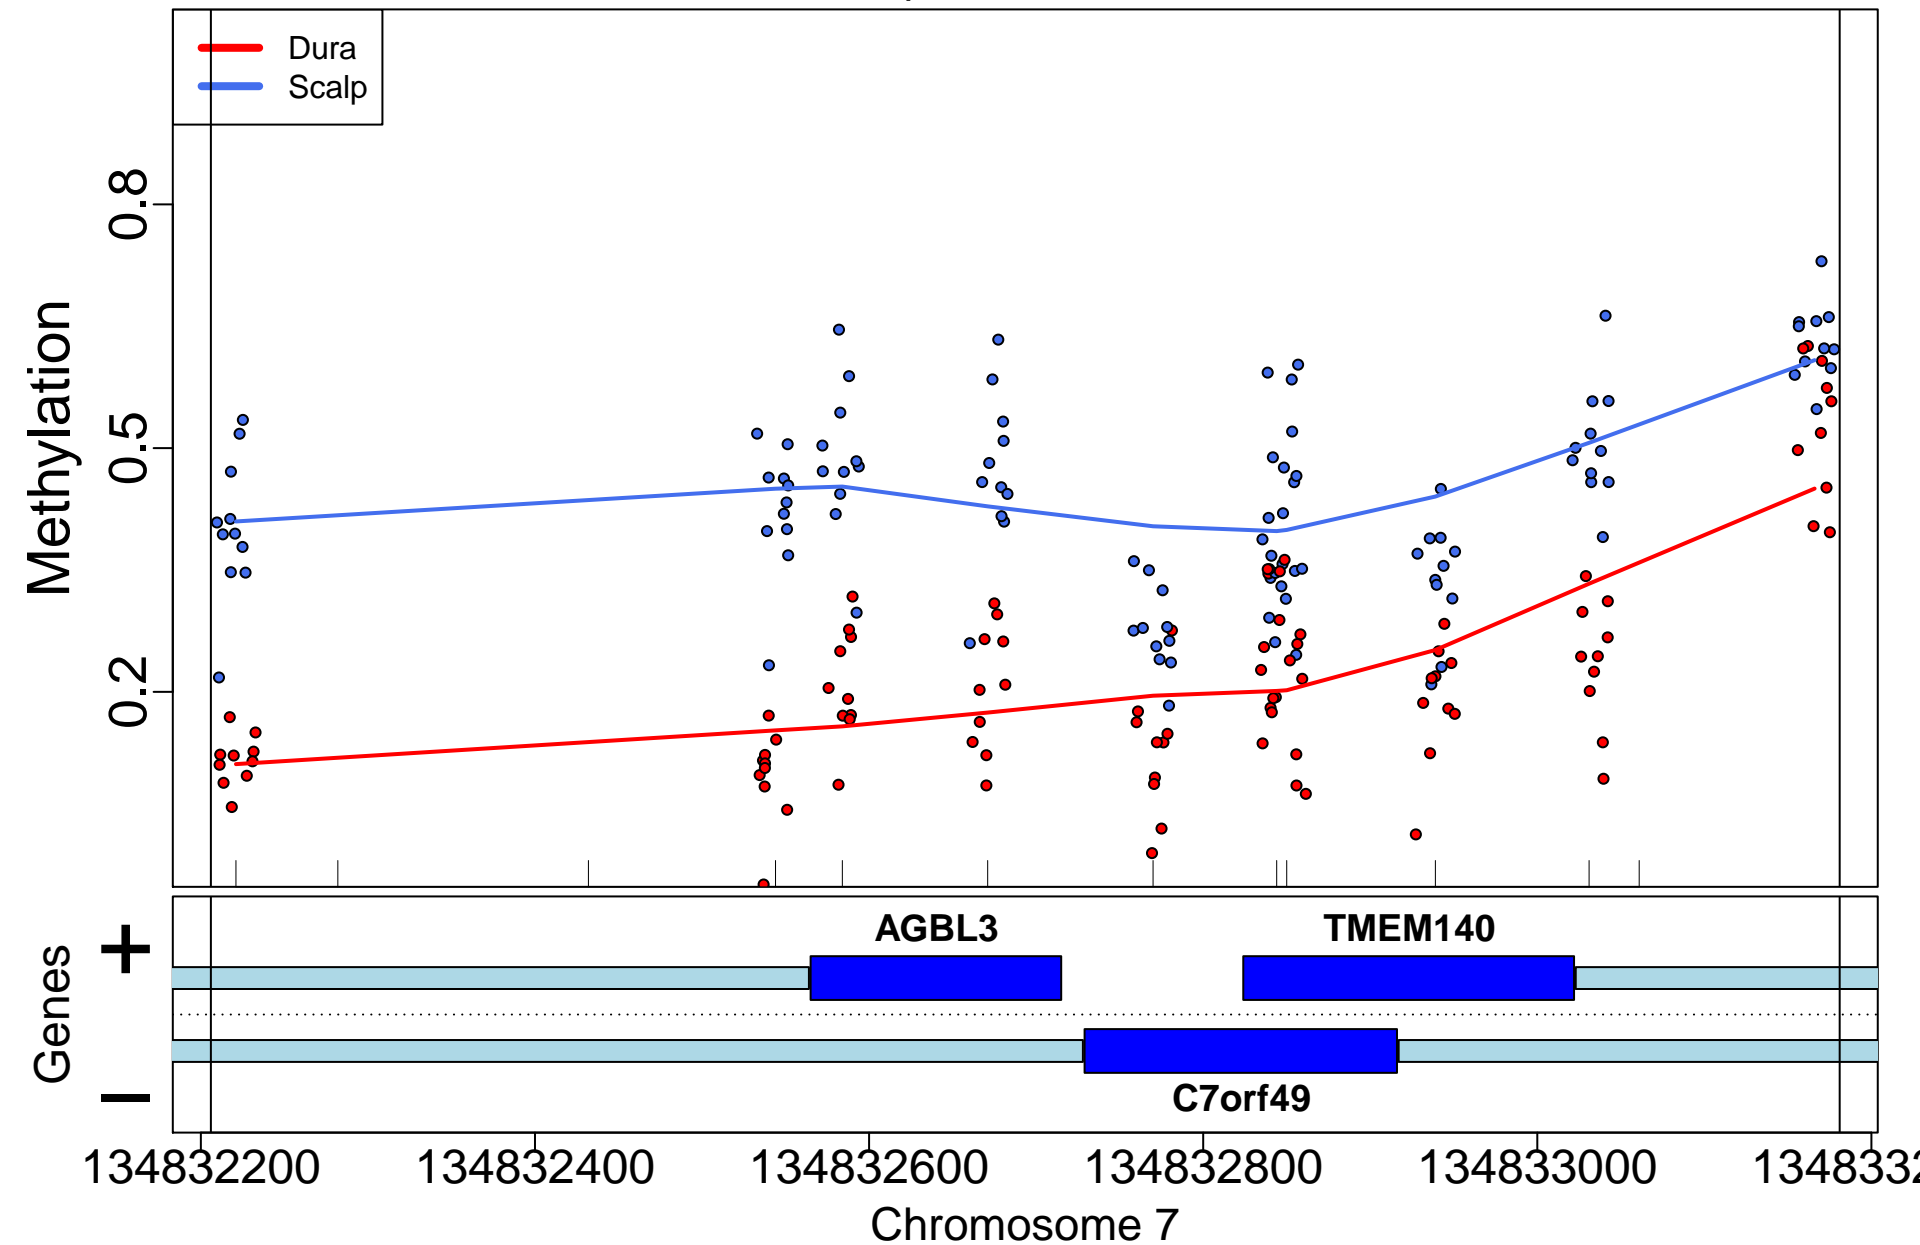

C10orf71; 0bp from tss:overlaps 5'

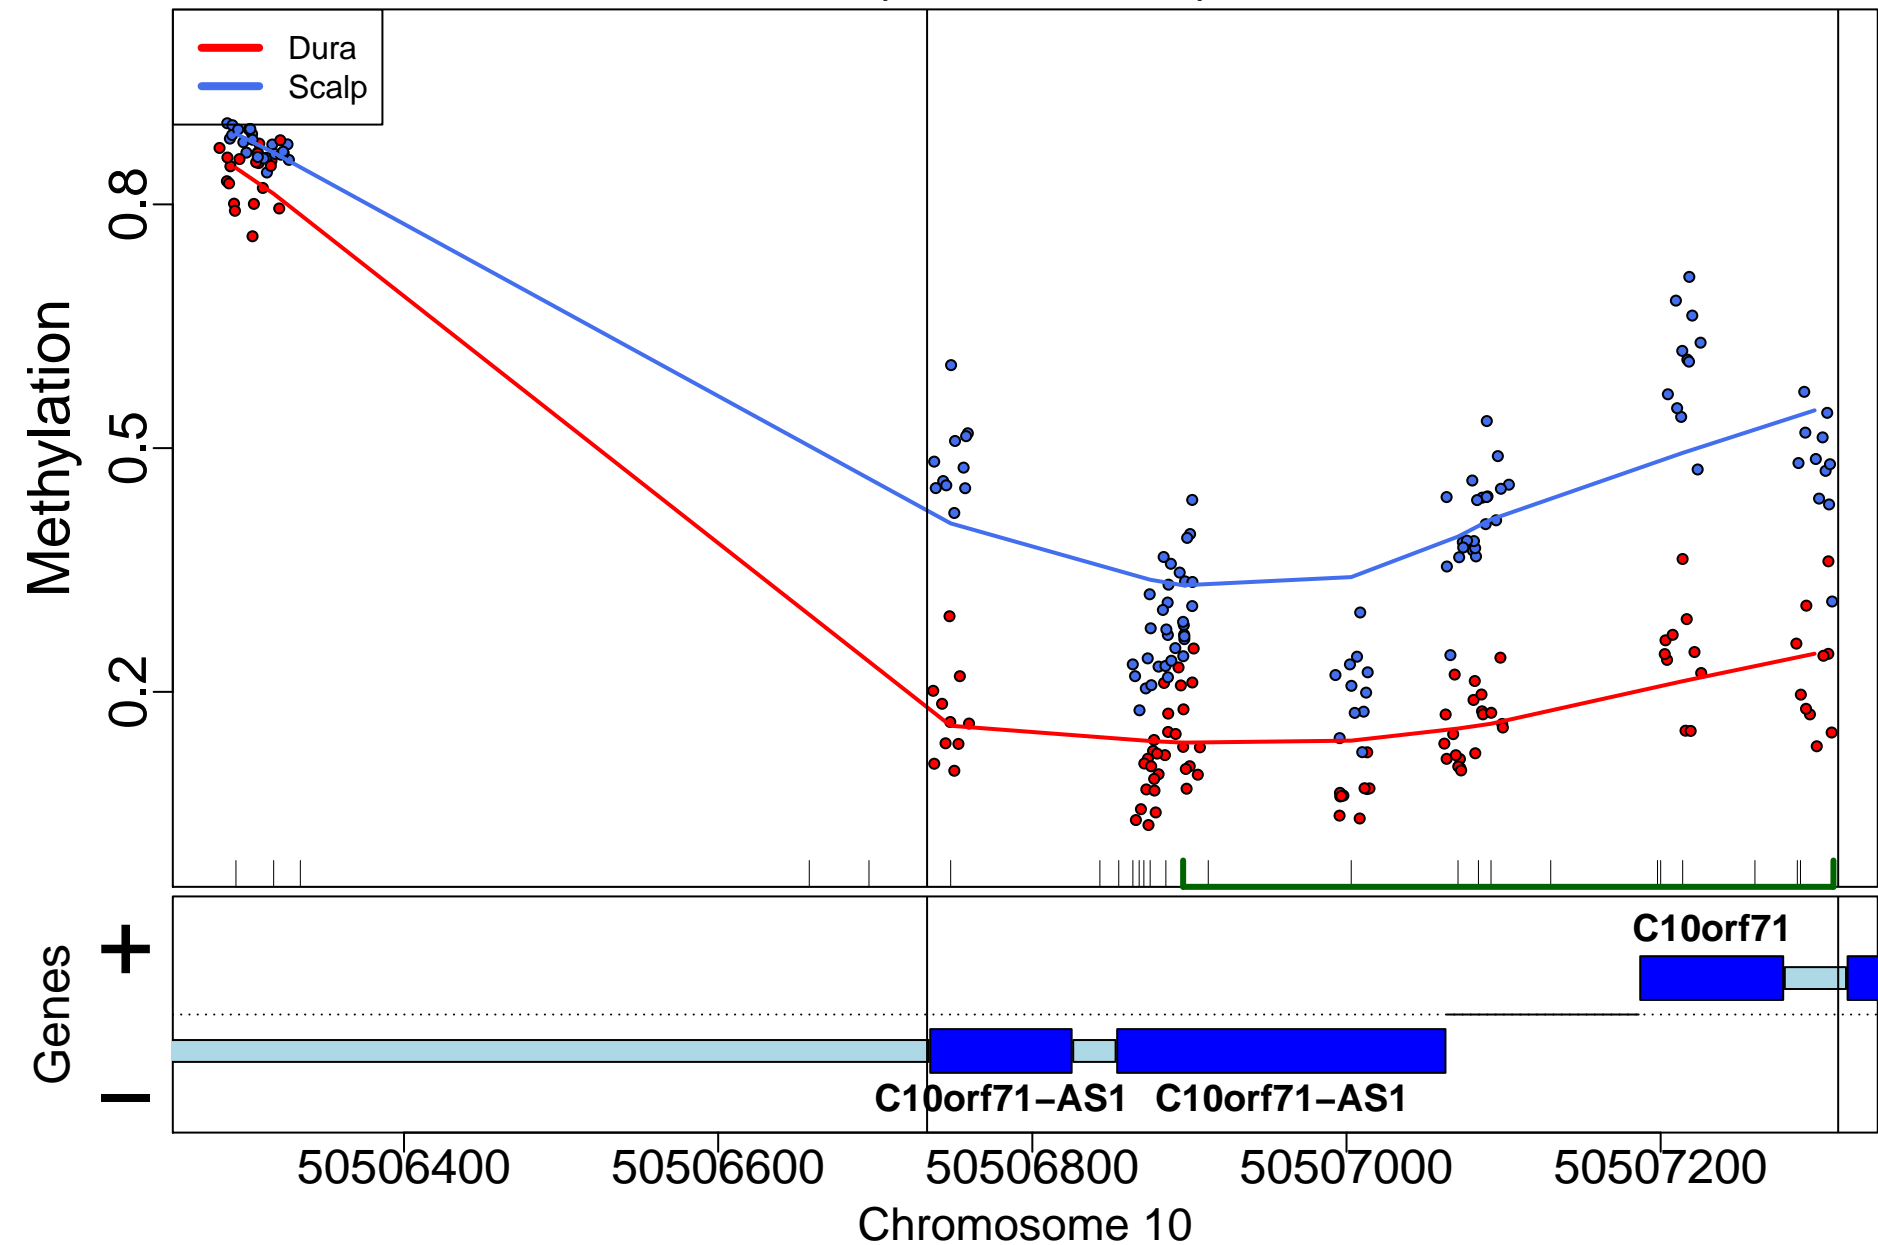

LINC01101; 23076bp from tss:downstream

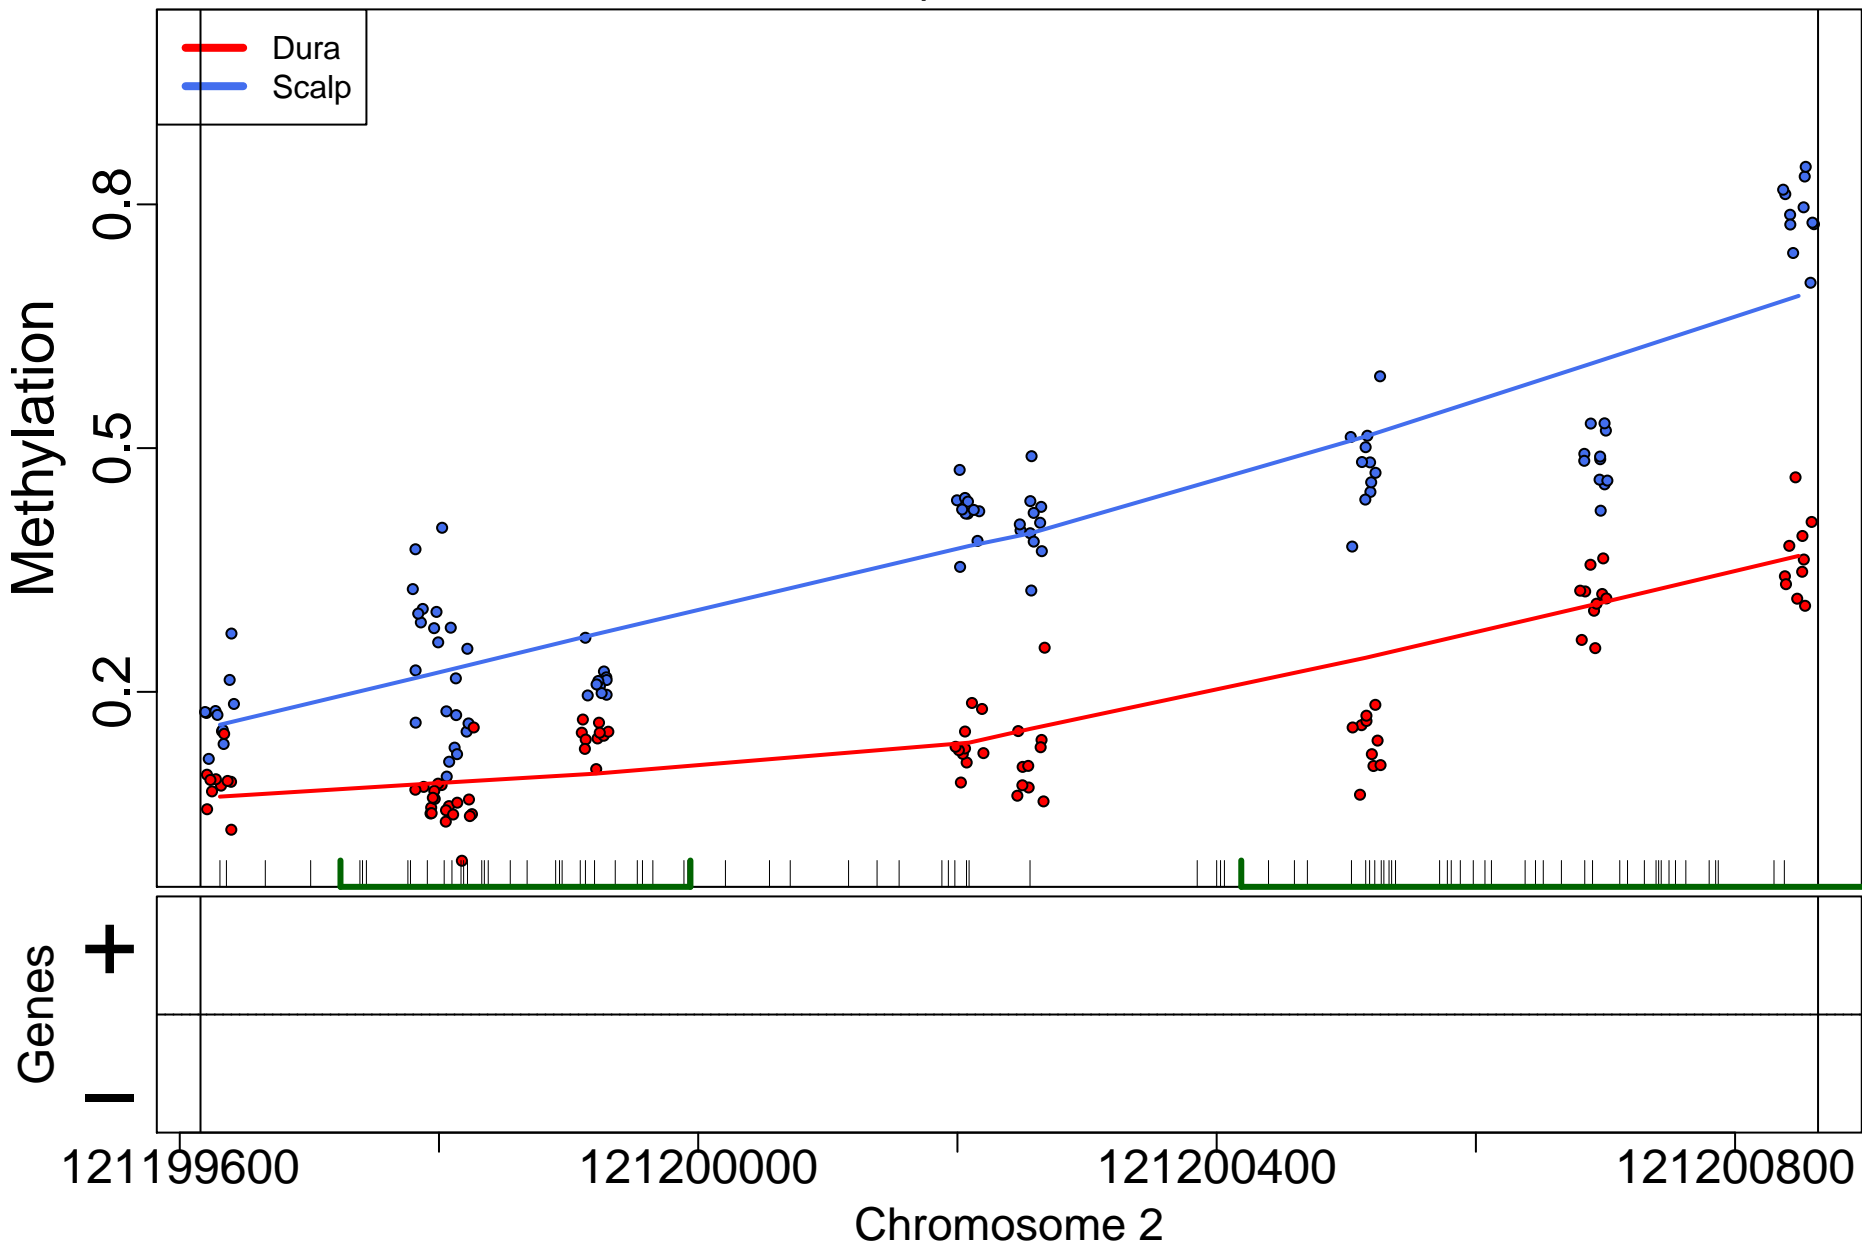

LOC286083; 0bp from tss:NA

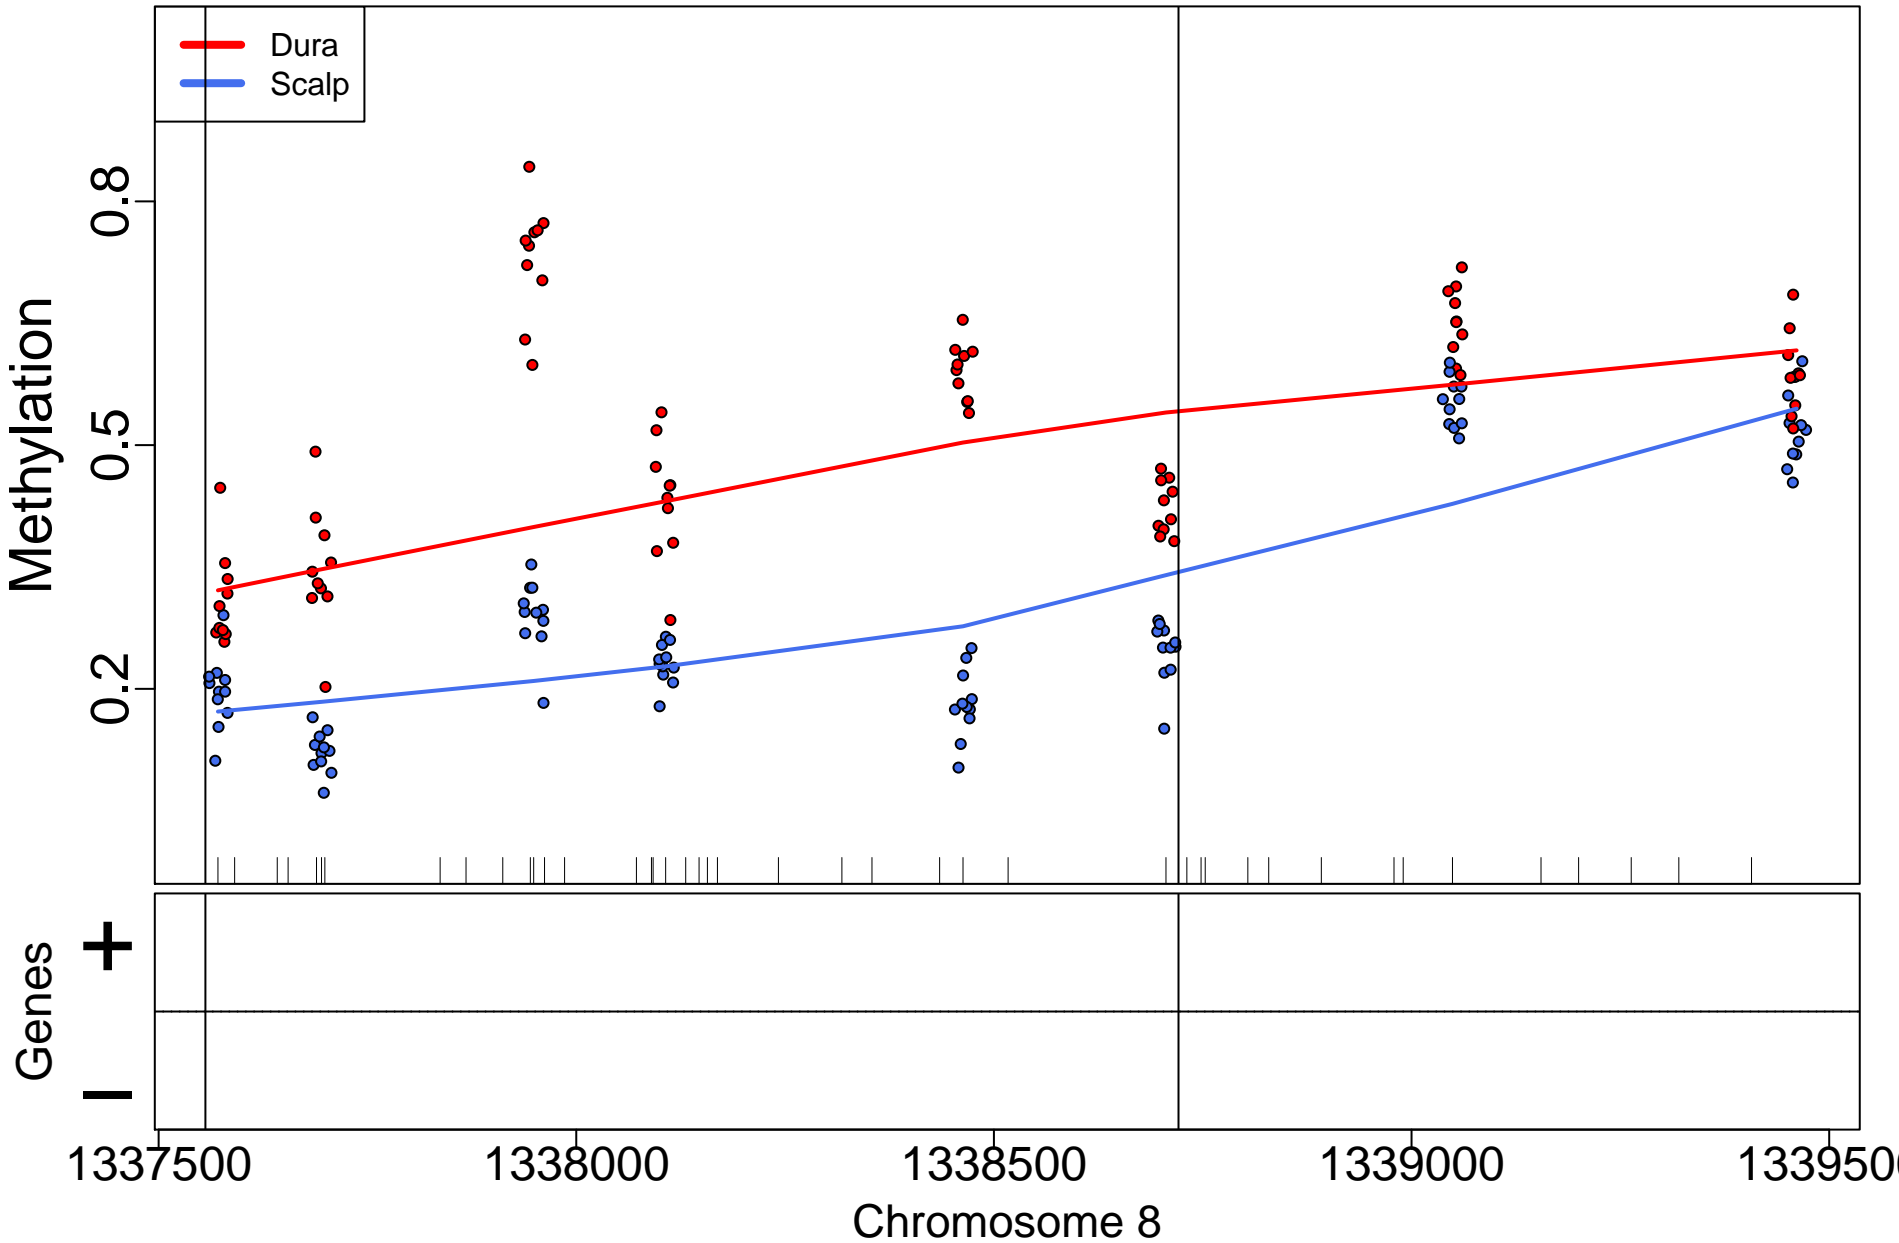

SULF1; 99bp from tss:promoter

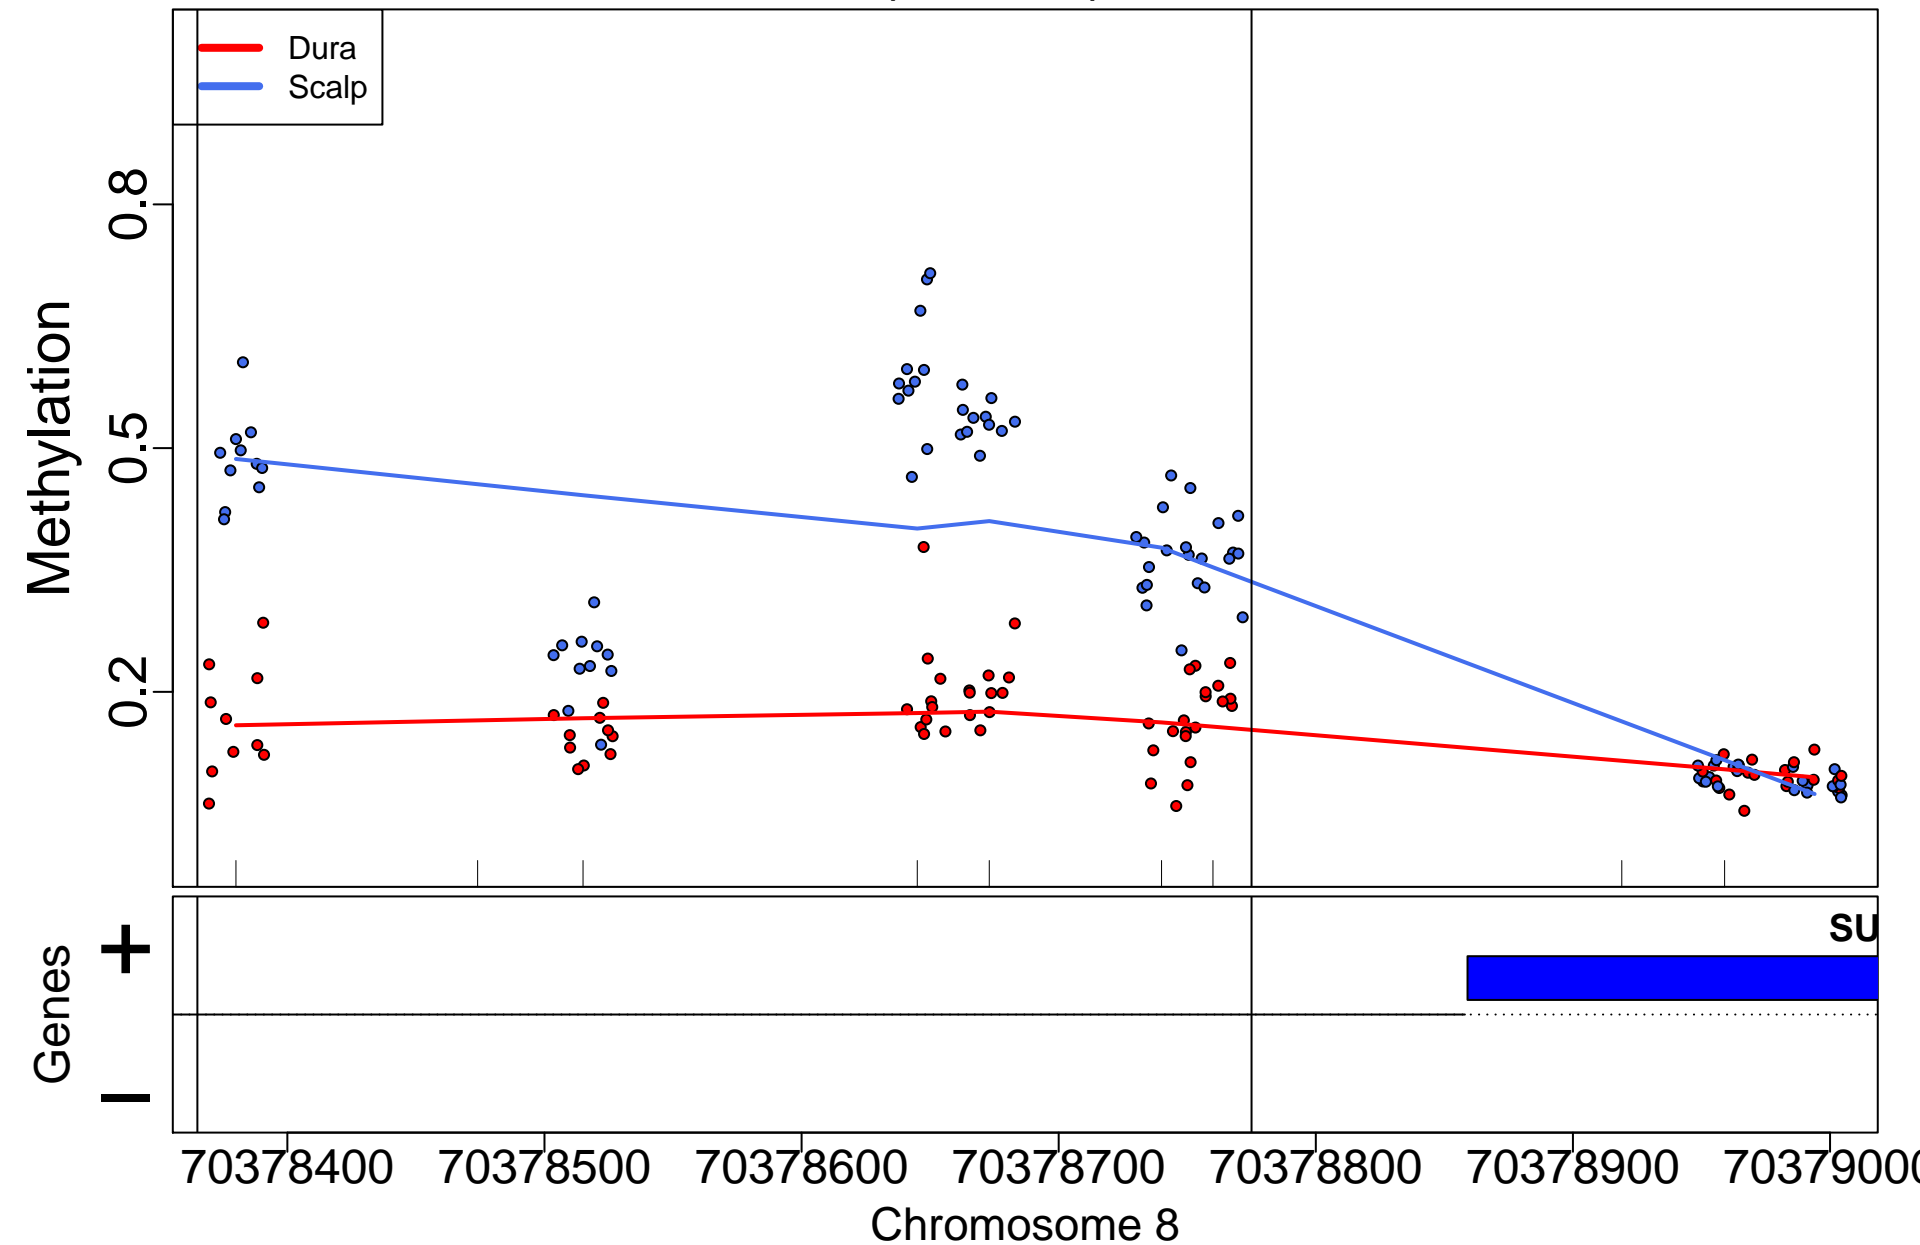

C7orf50; 94420bp from tss:inside intron

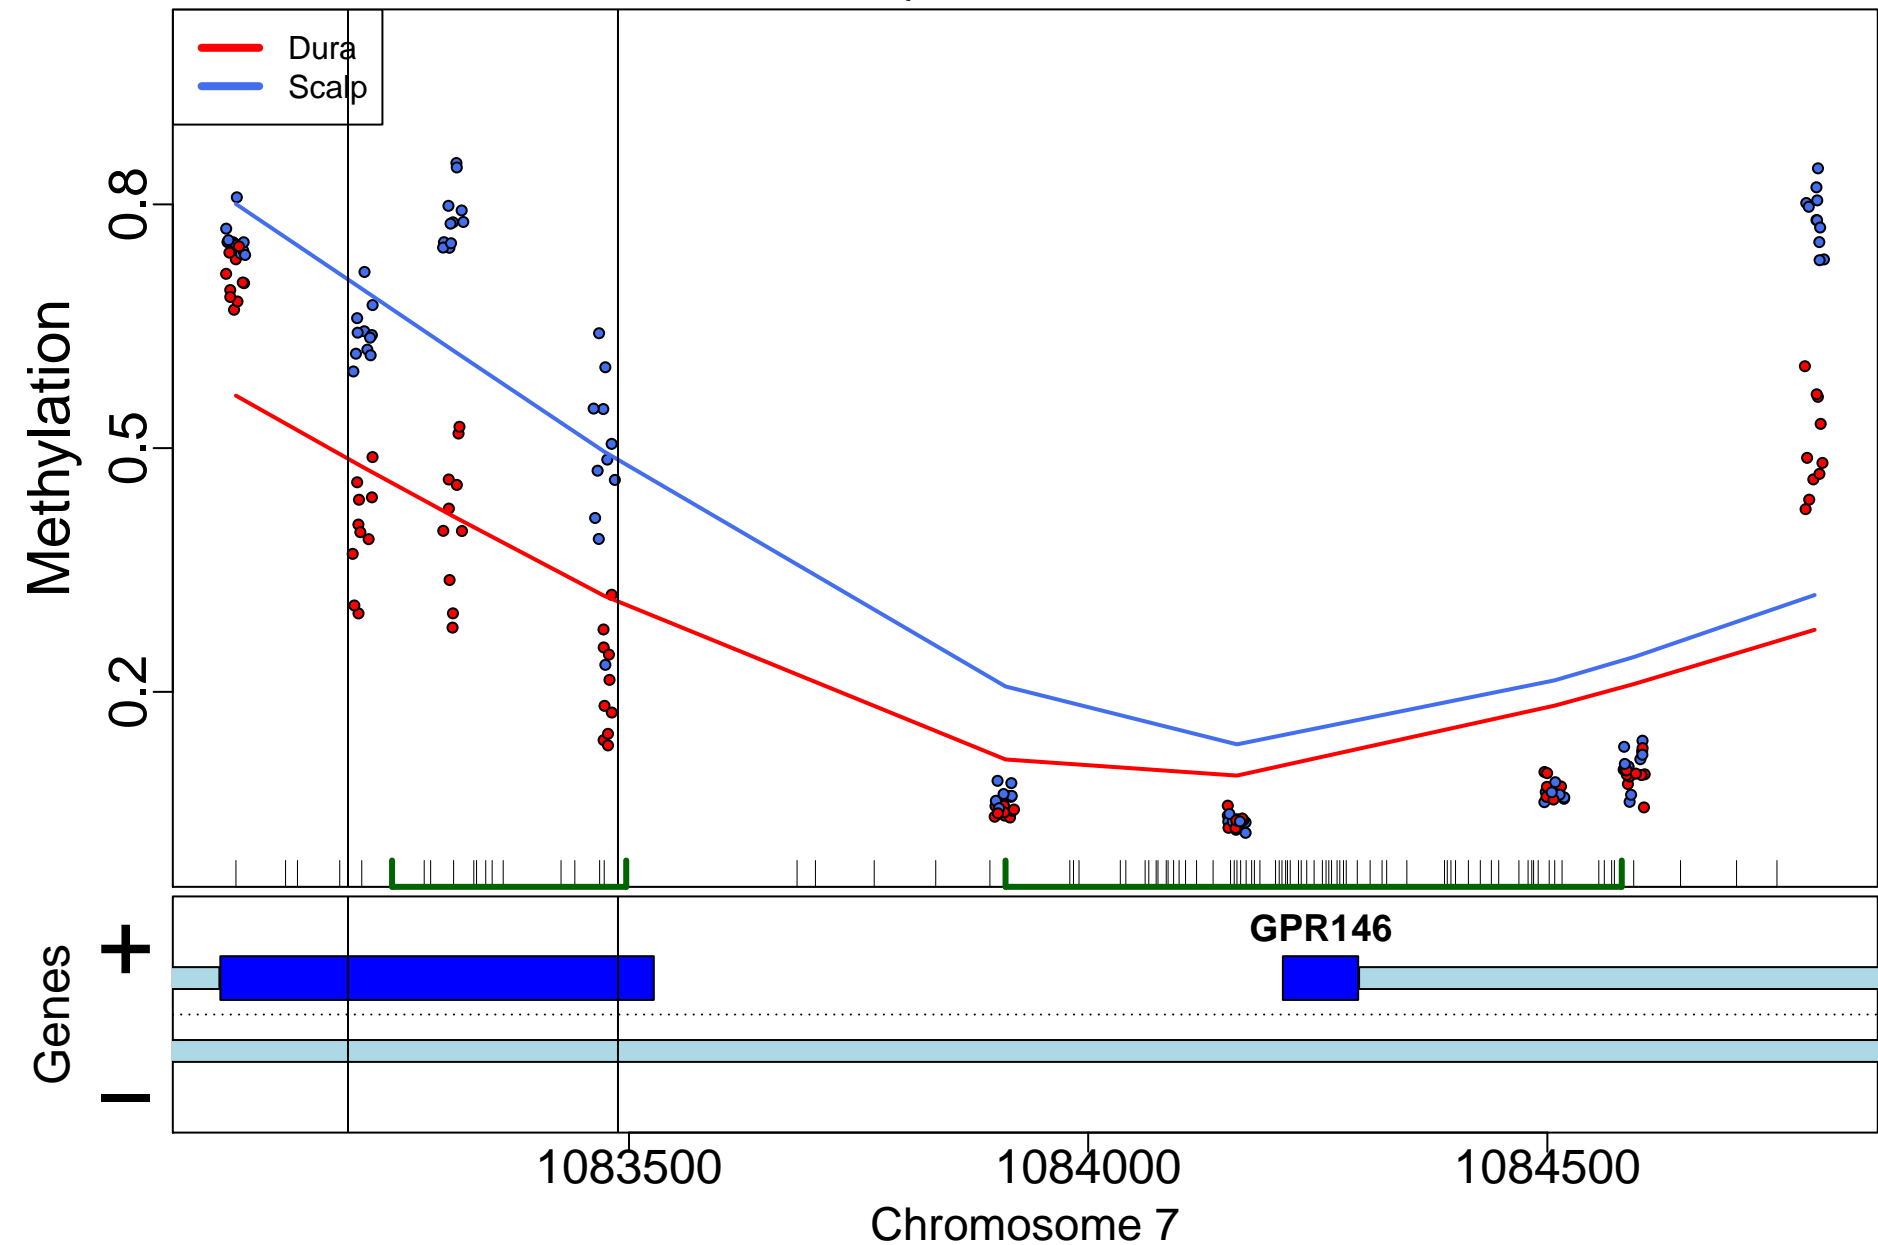



# SLC18A2; 348bp from tss:promoter

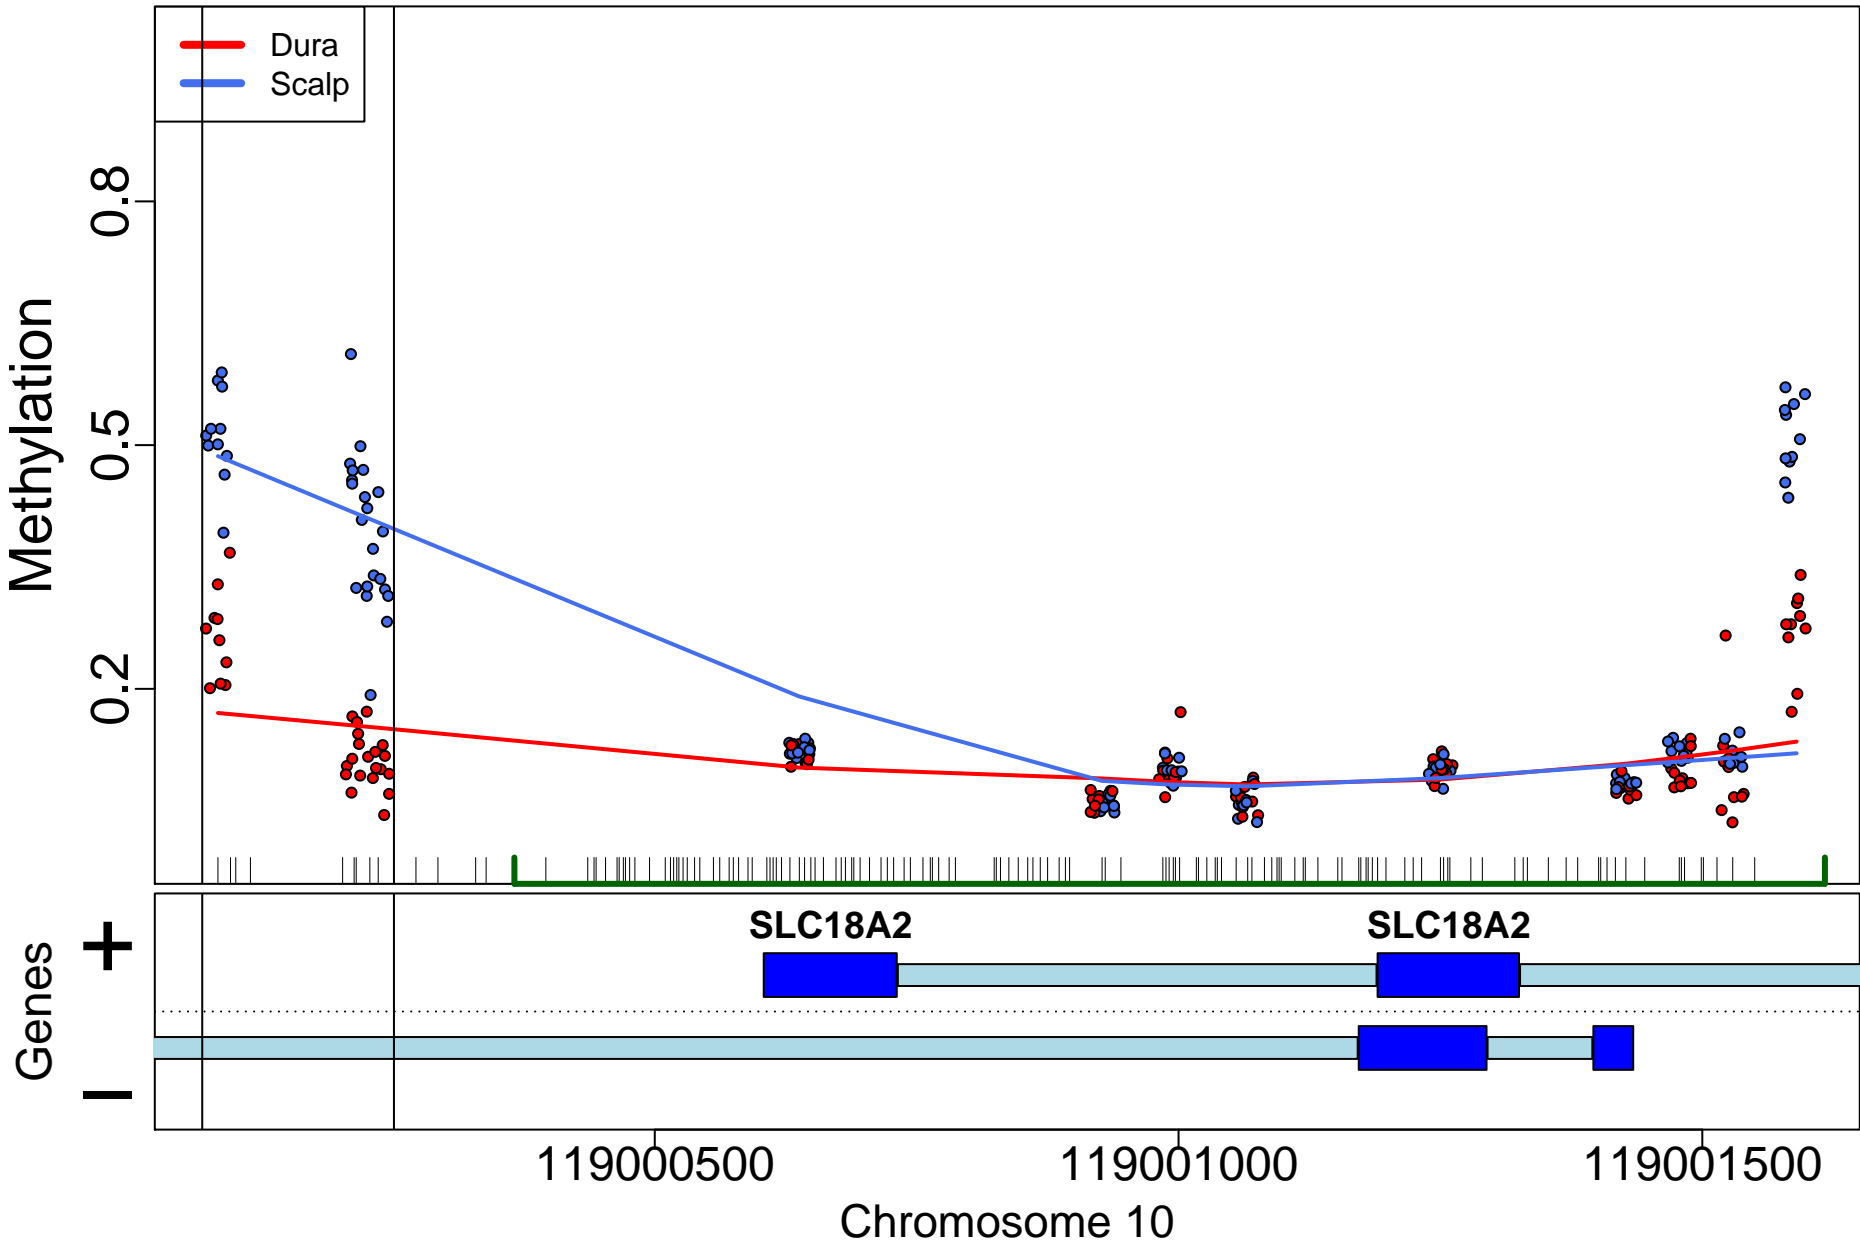

PIK3R1; 27906bp from tss:upstream

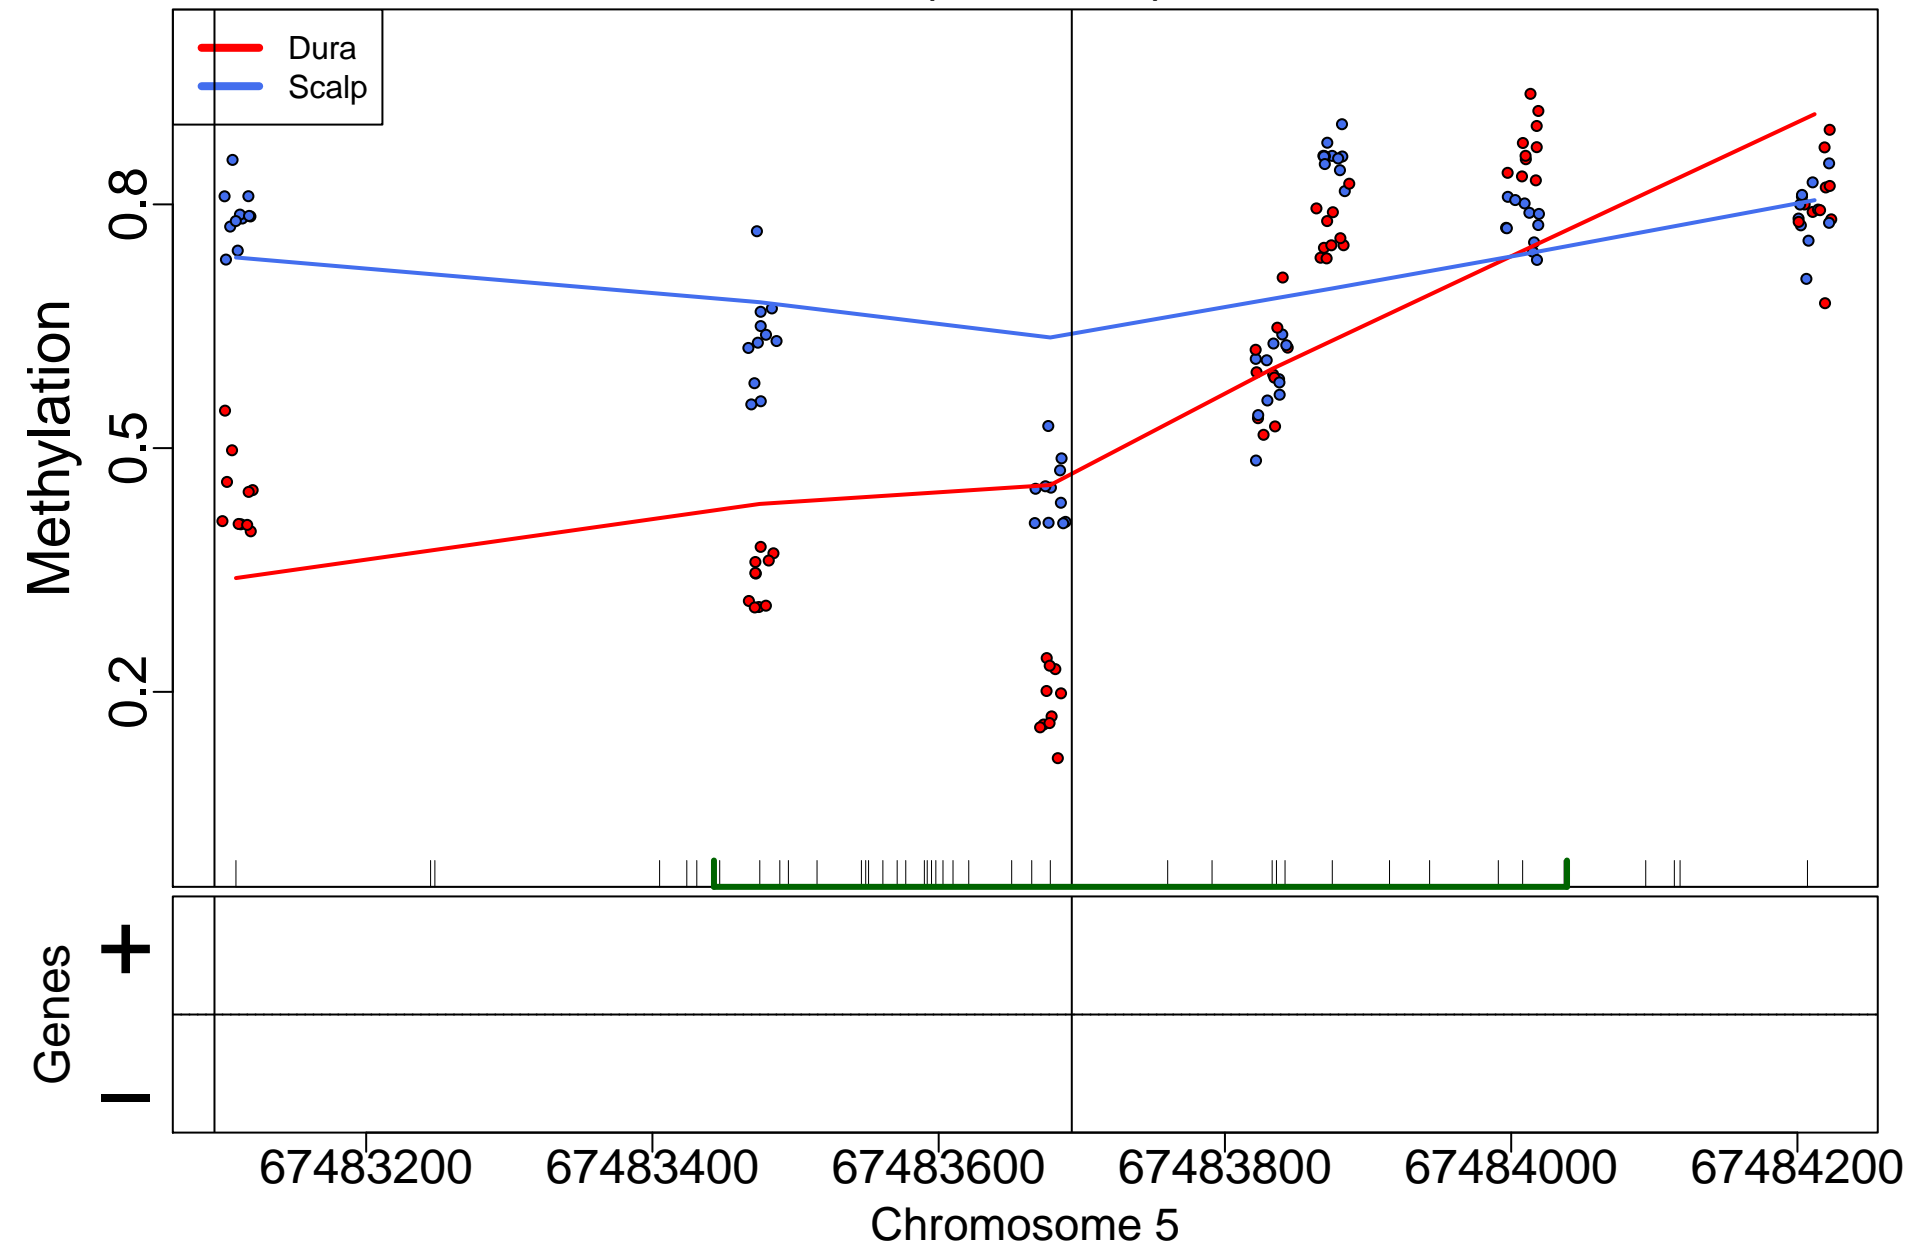

MIA3; 1110bp from tss:inside intron

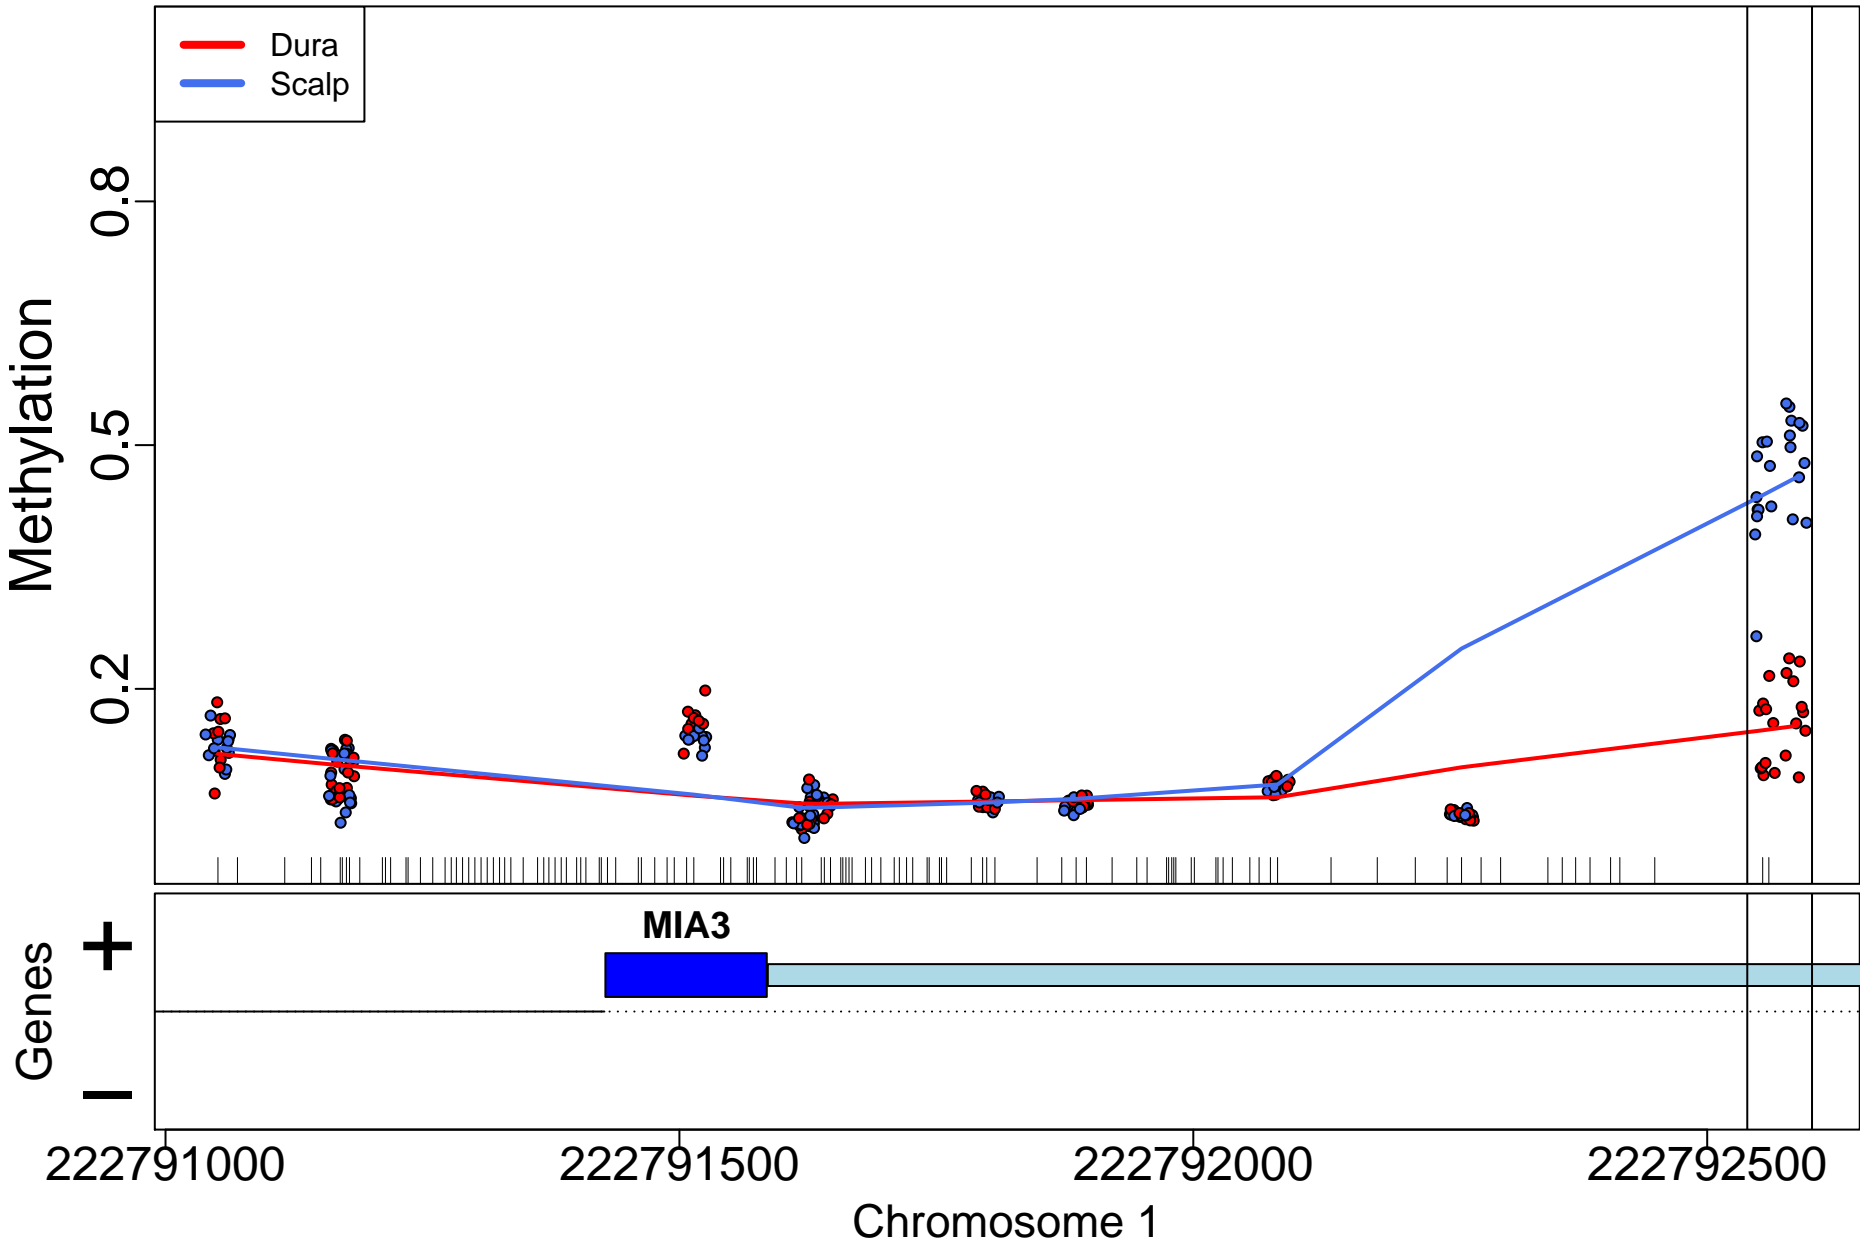

CRLS1; 145bp from tss:overlaps exon downstream

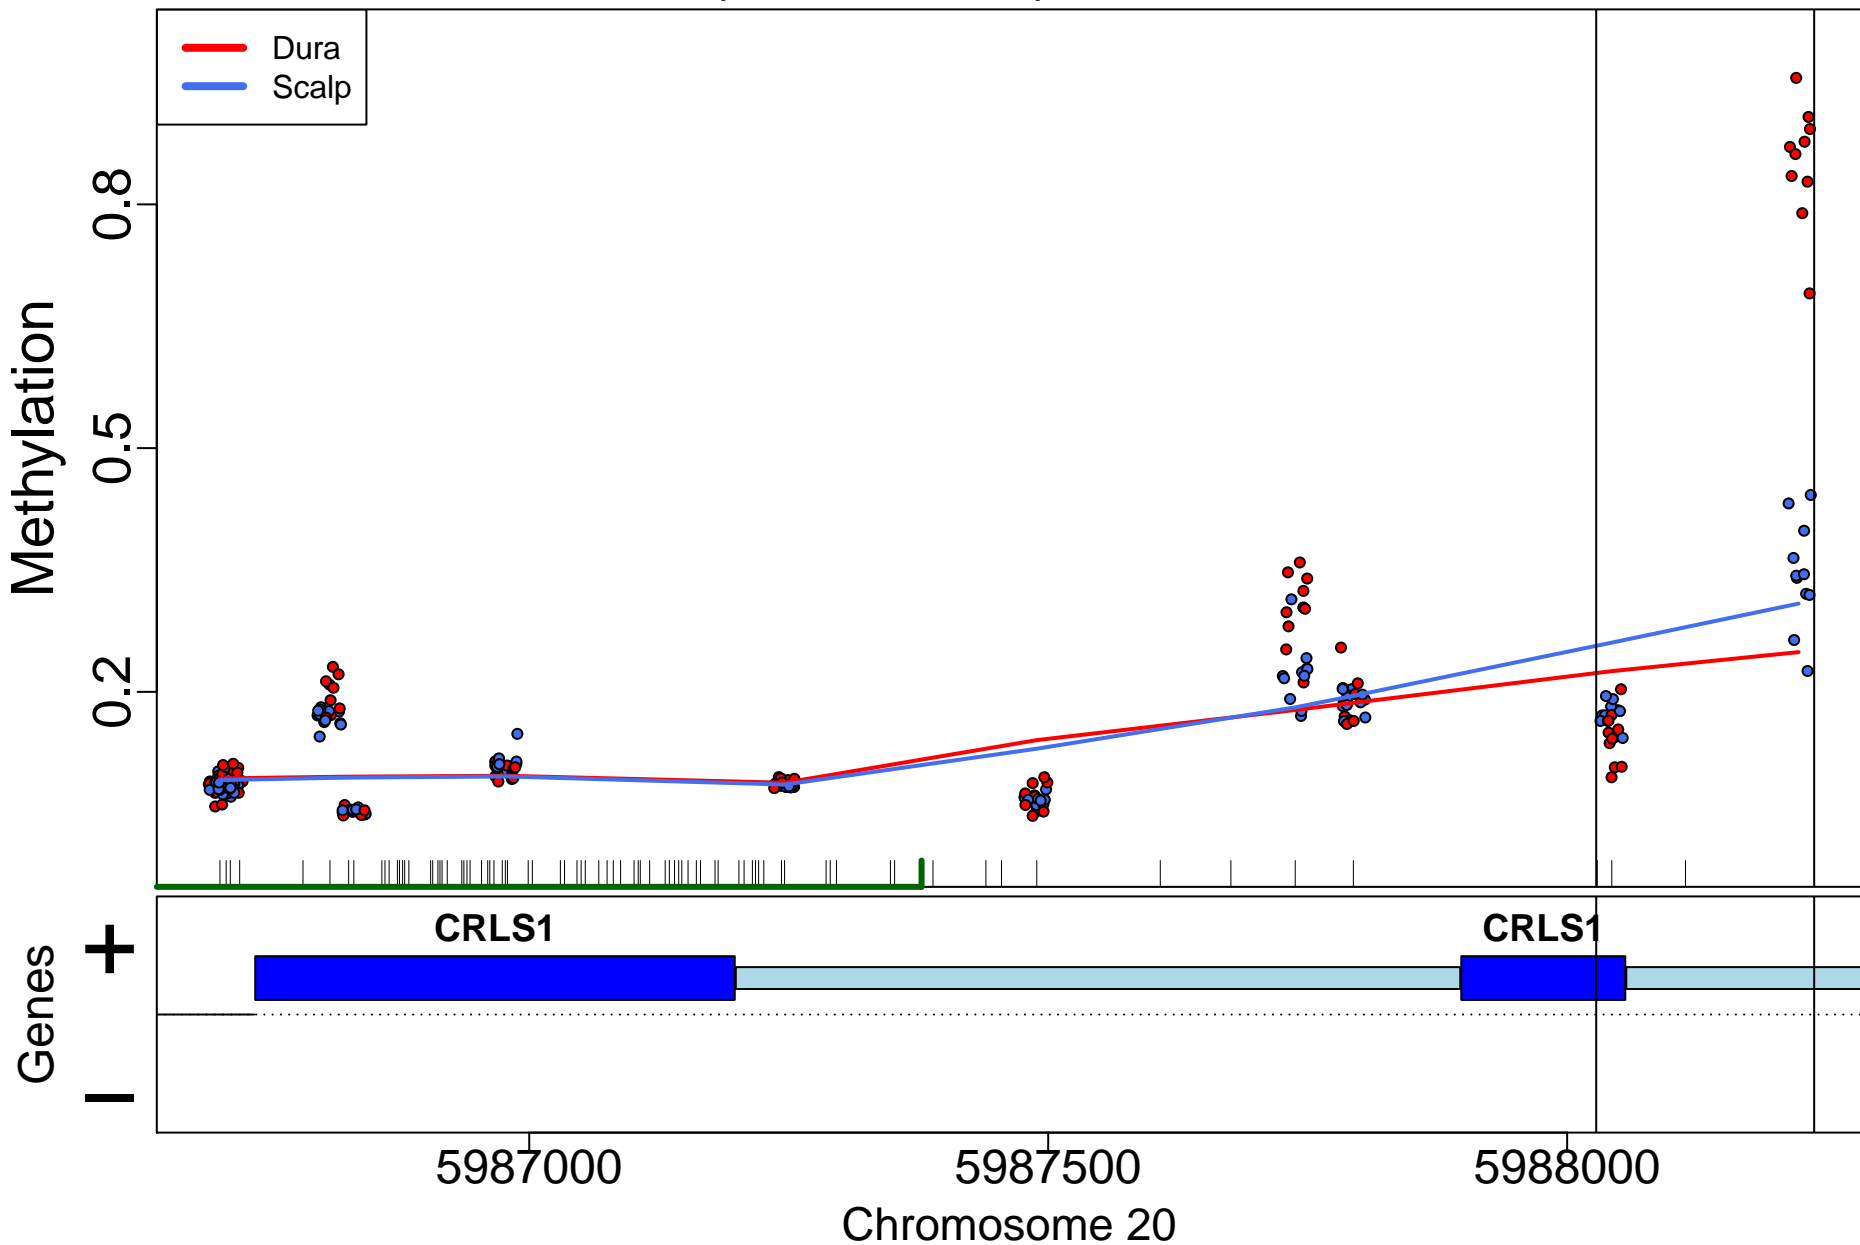

# RREB1; 33159bp from tss:inside intron

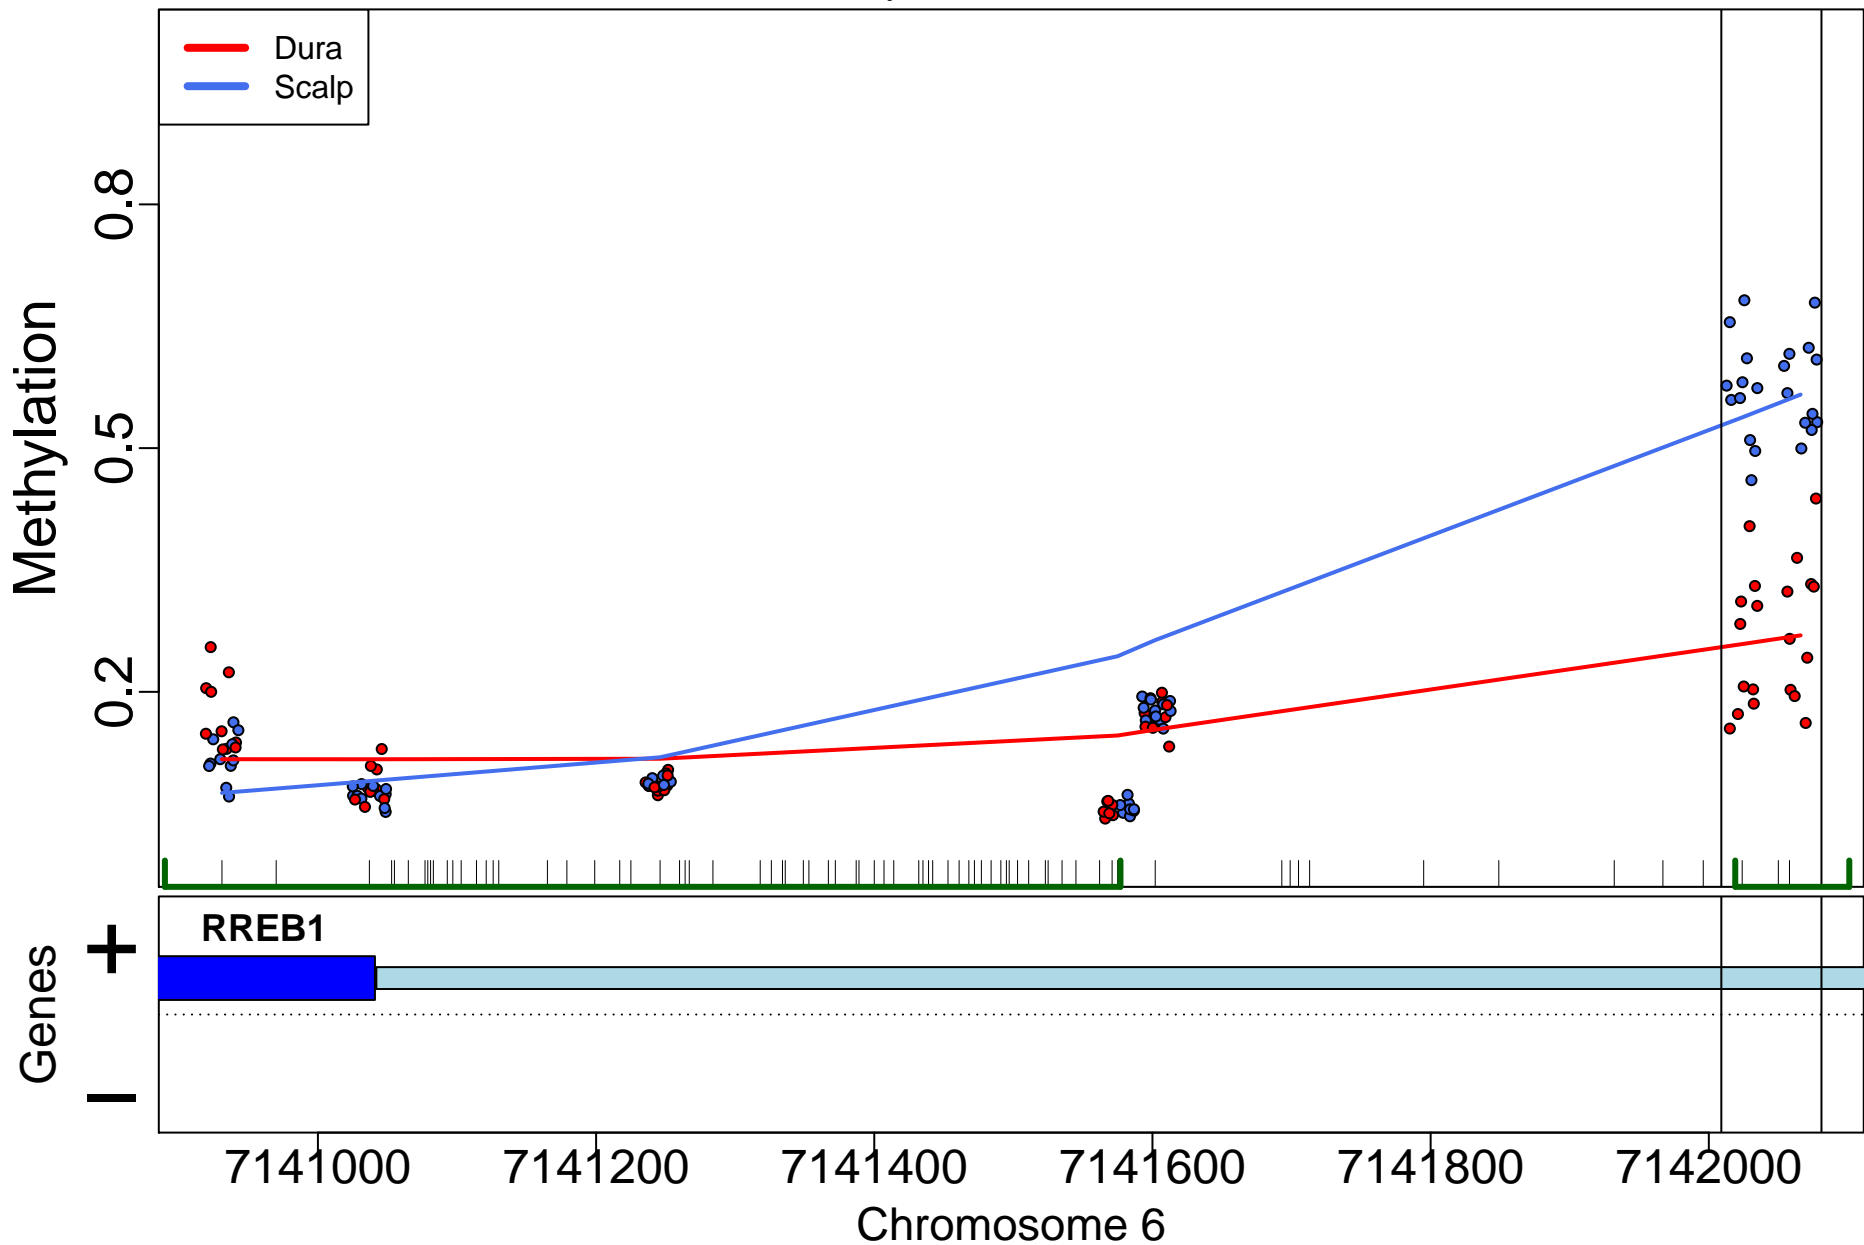

TPM4; 0bp from tss:overlaps 5'

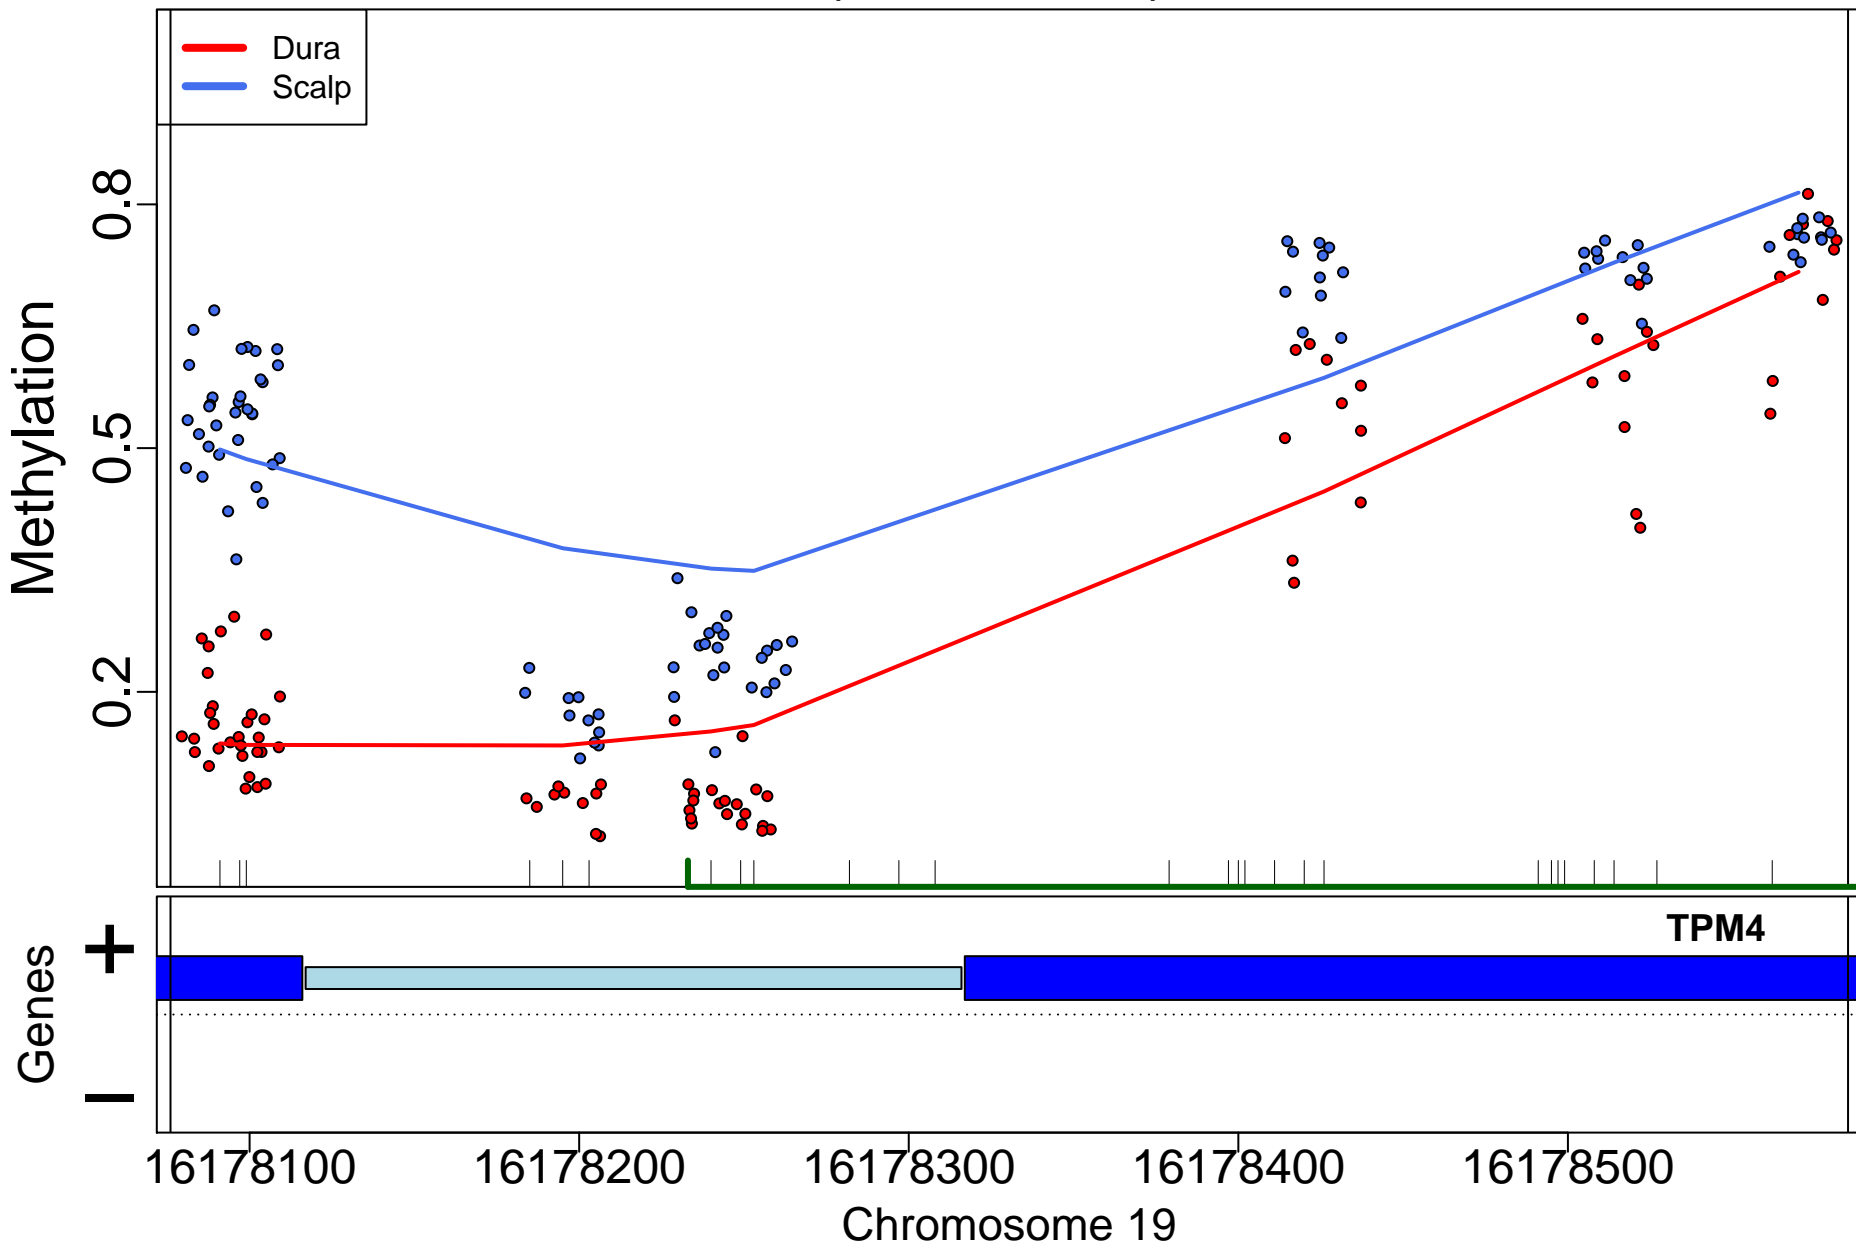



ZIC1; 10322bp from tss:downstream

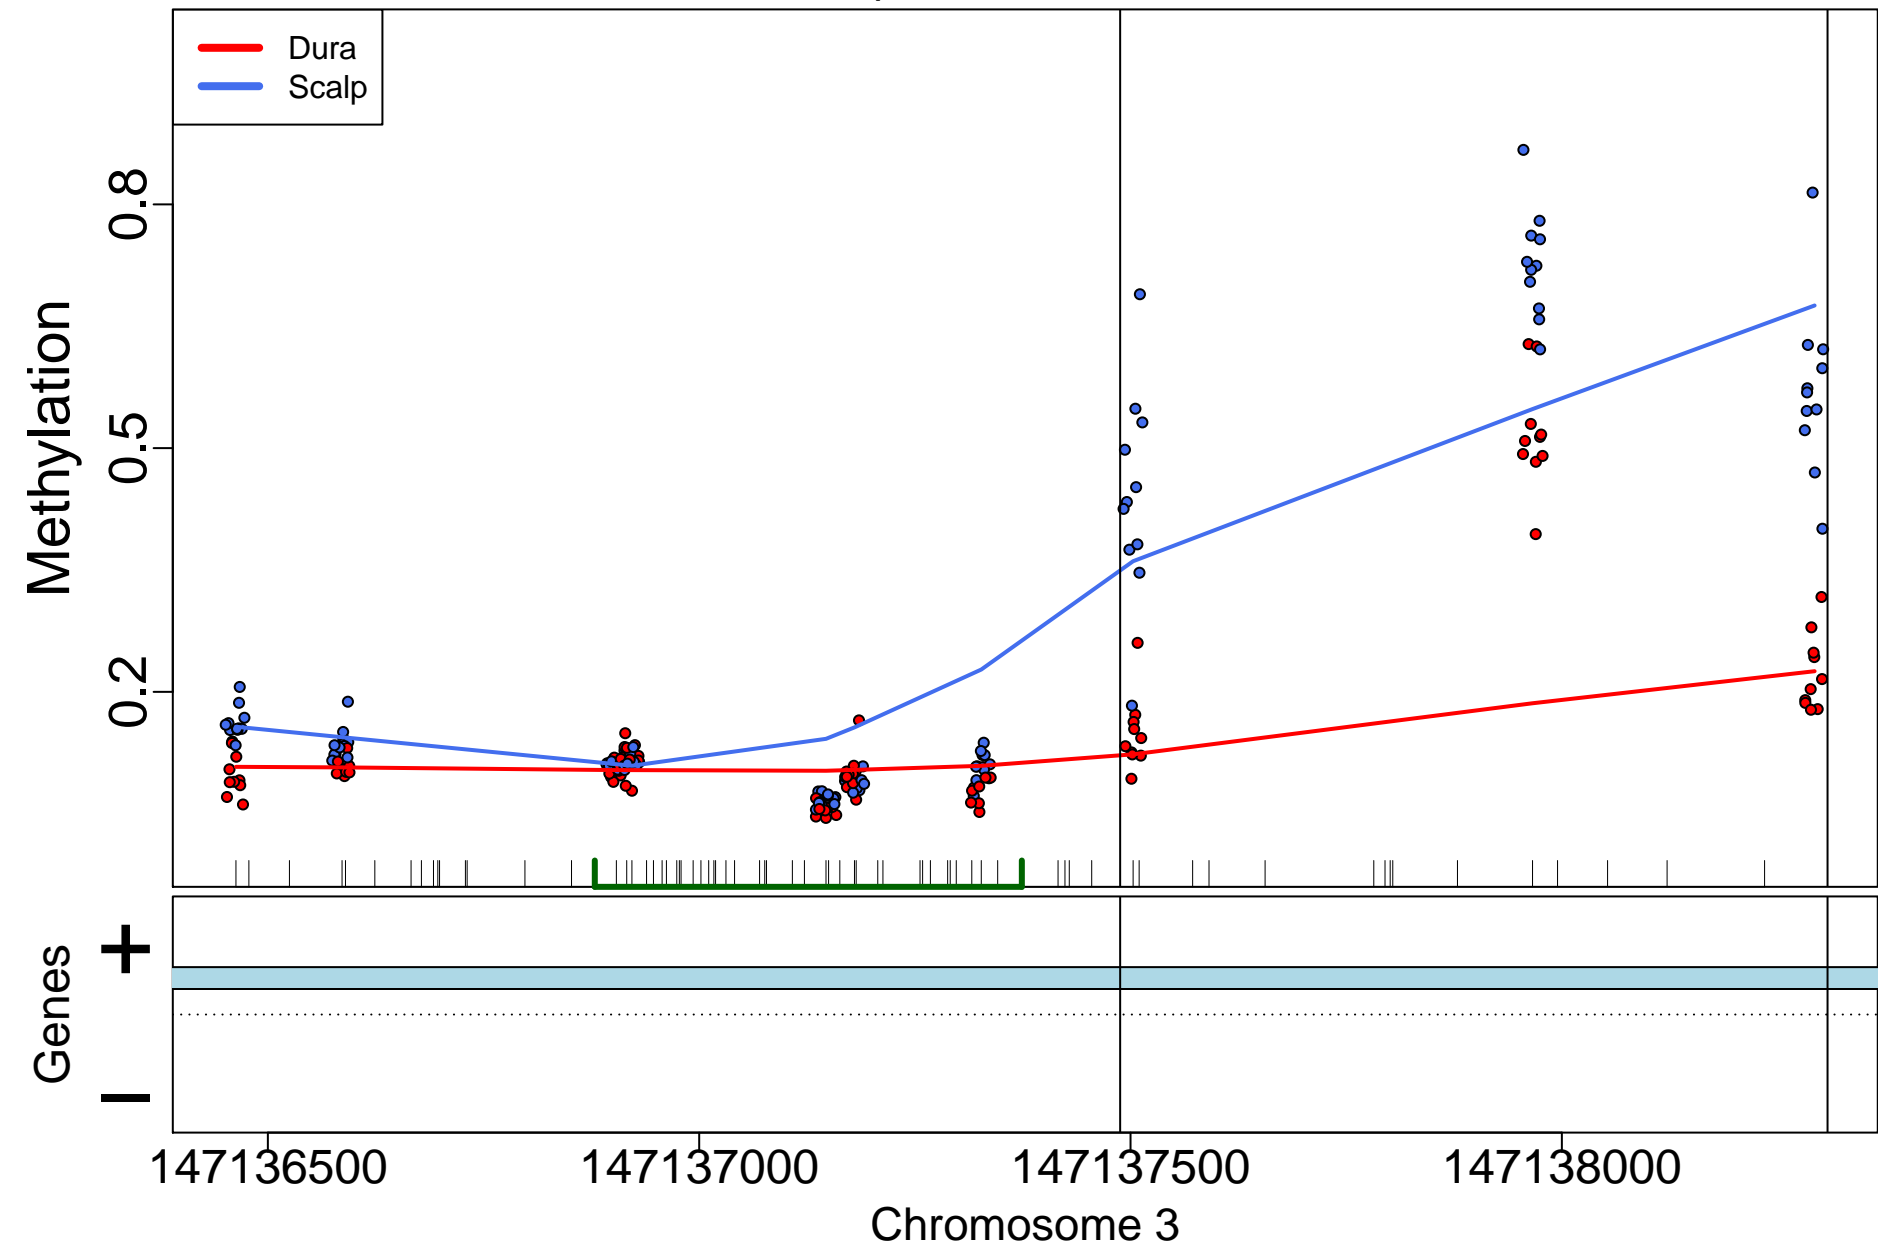



# SOD3; 332bp from tss:promoter

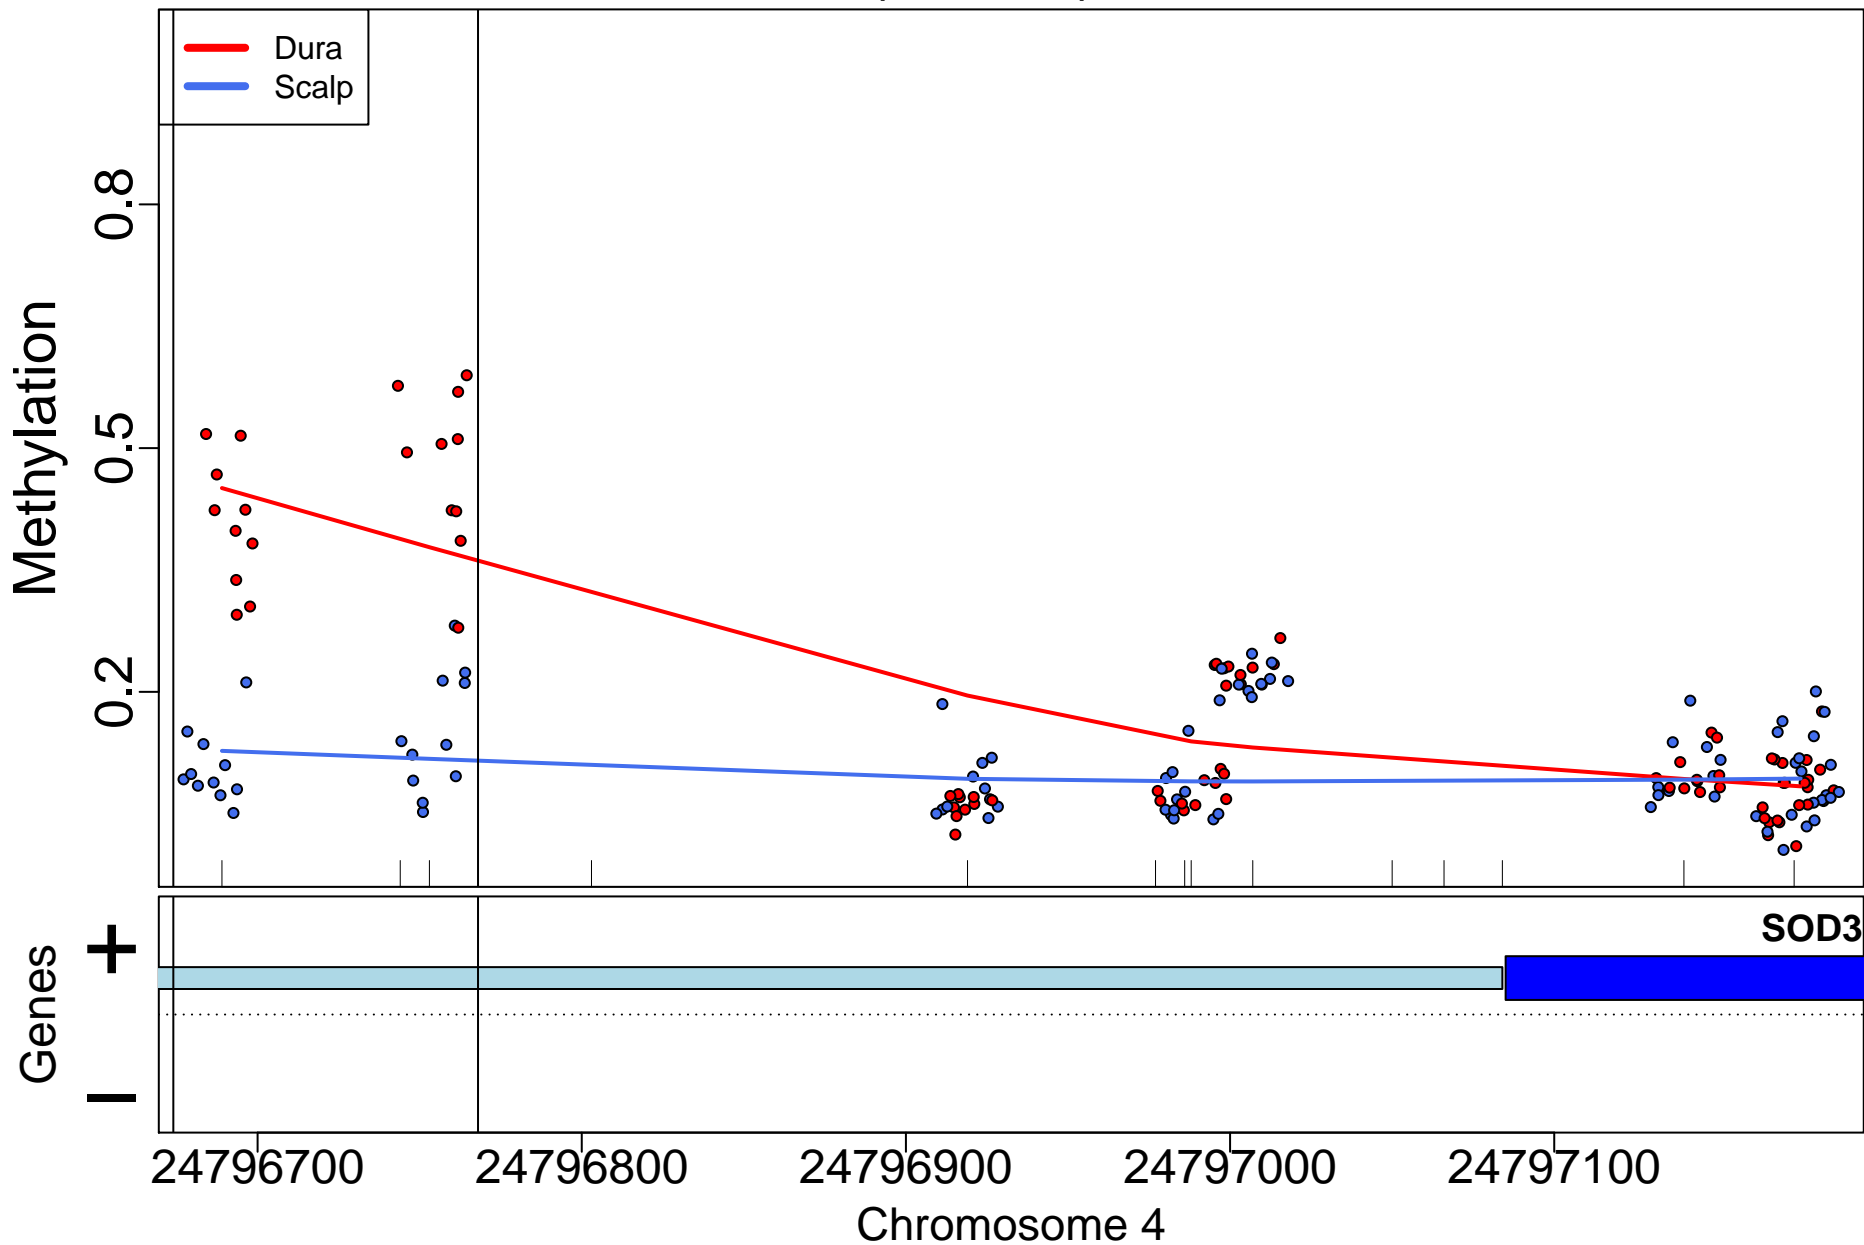

MKI67; 414102bp from tss:upstream

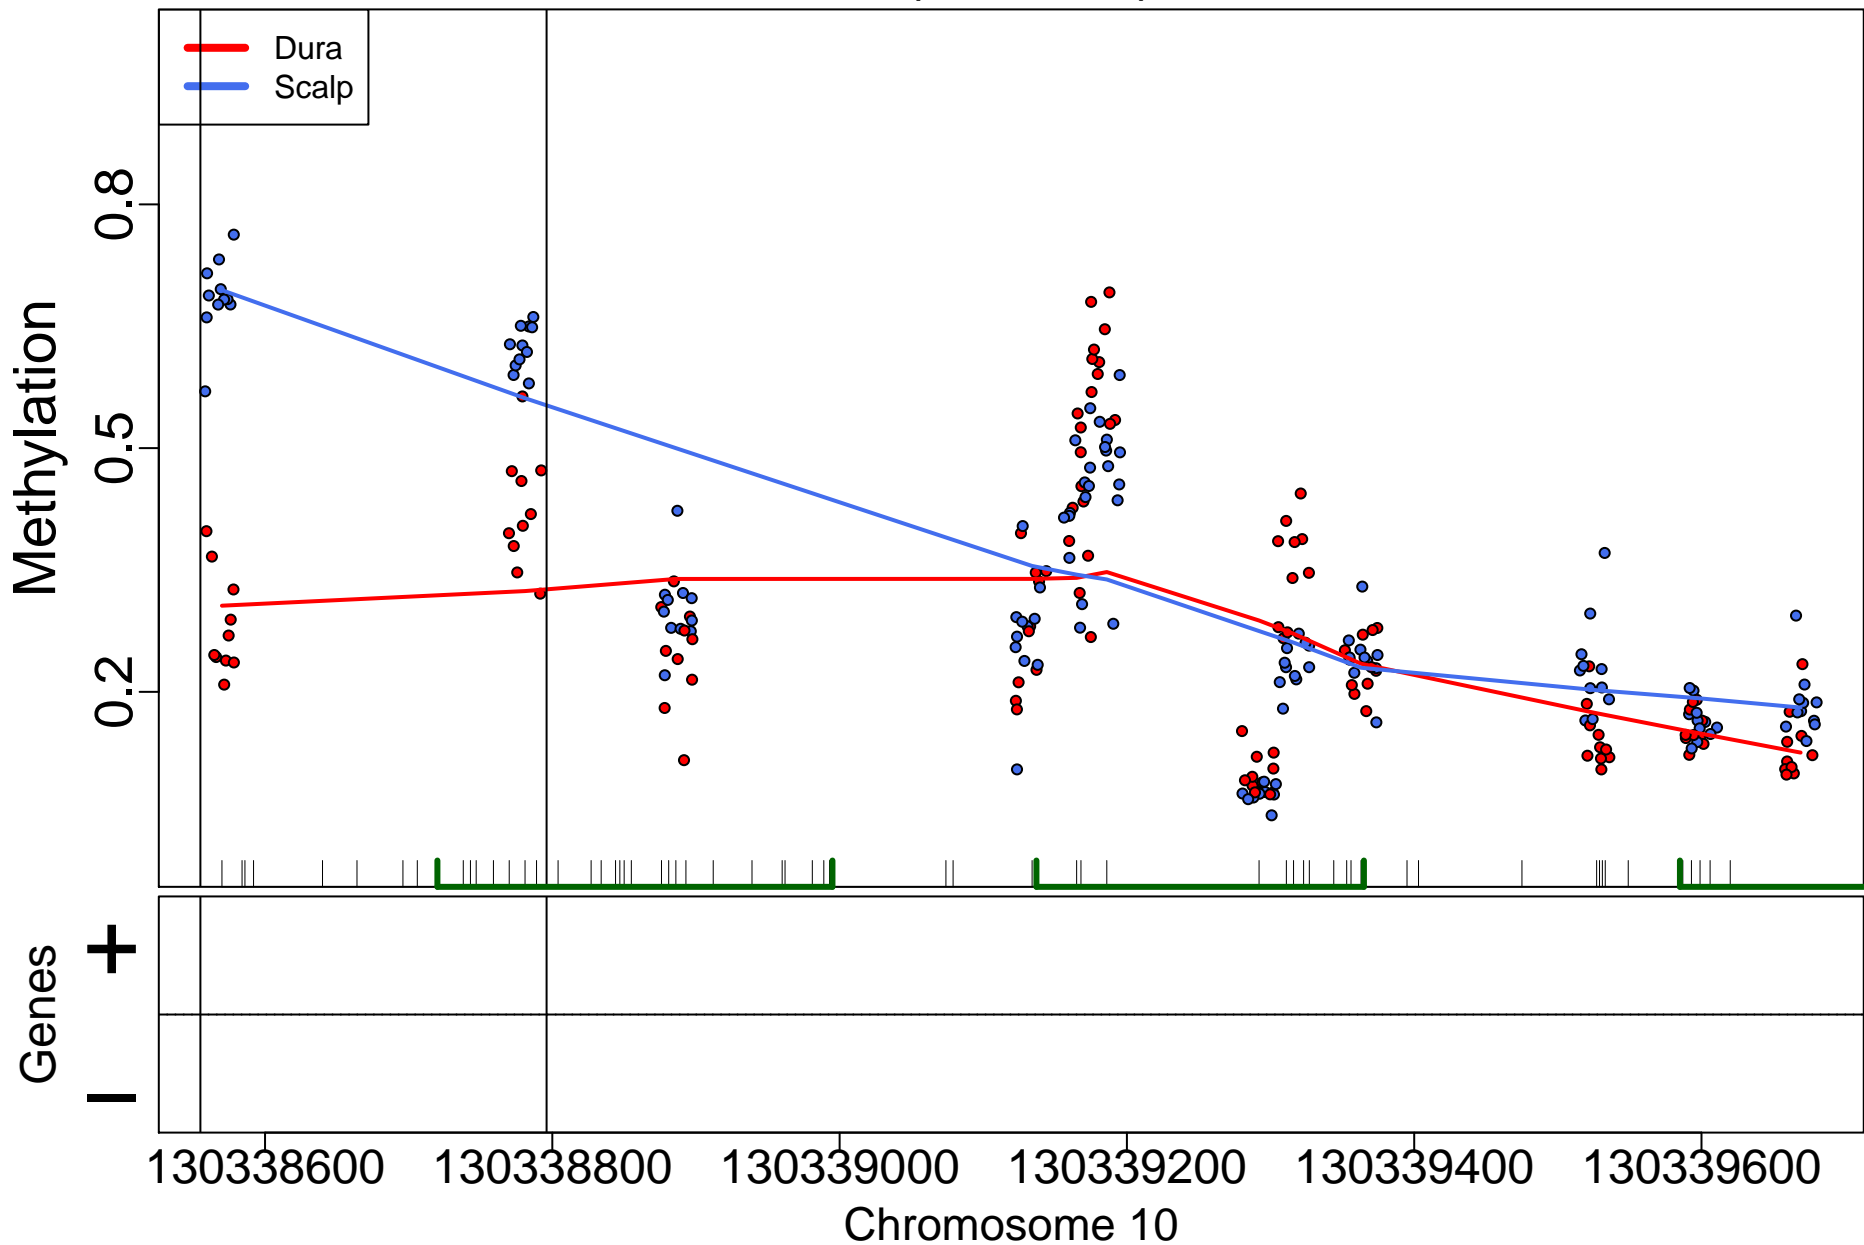

GPR123; 43037bp from tss:inside exon

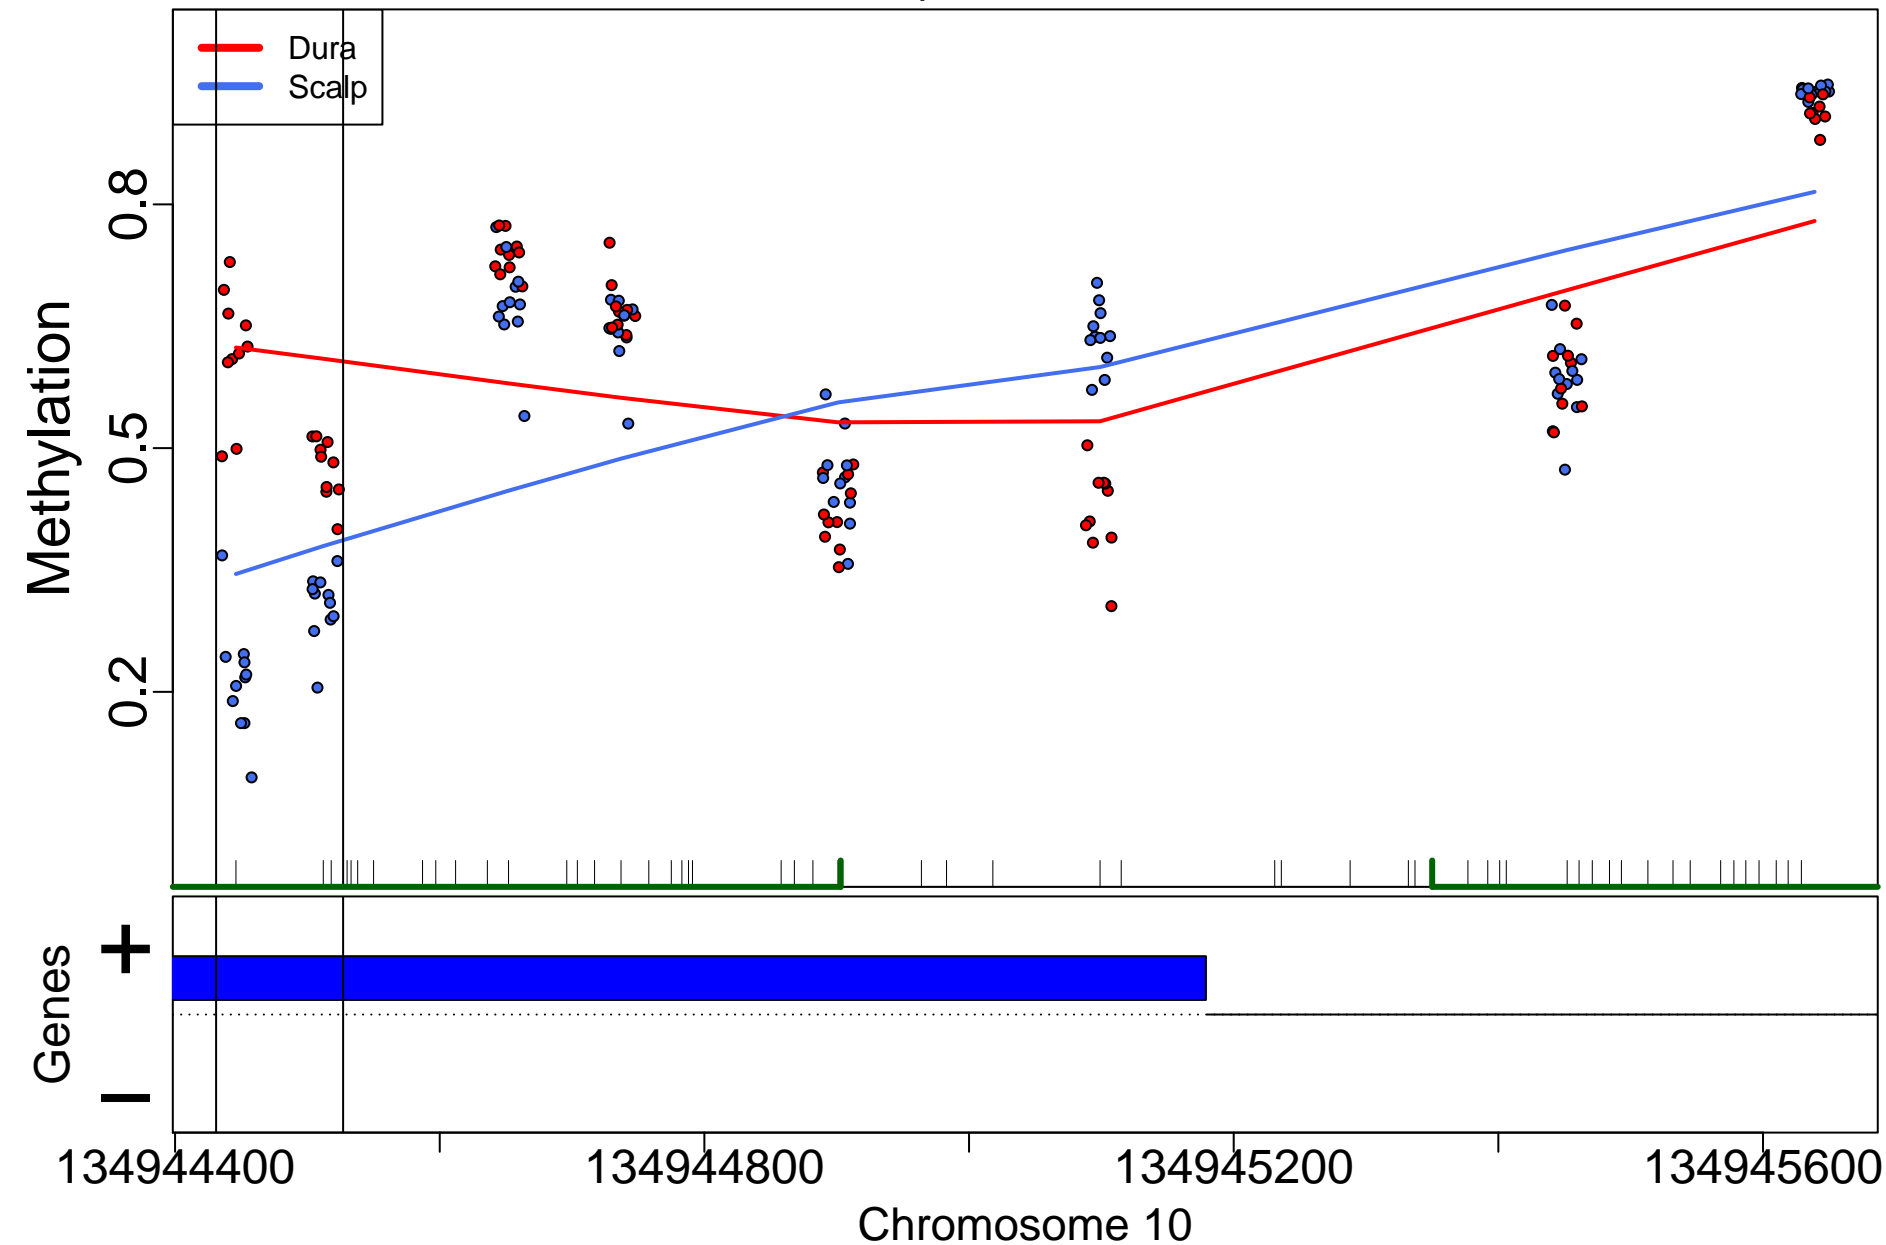

TBX15; 0bp from tss:overlaps 5'

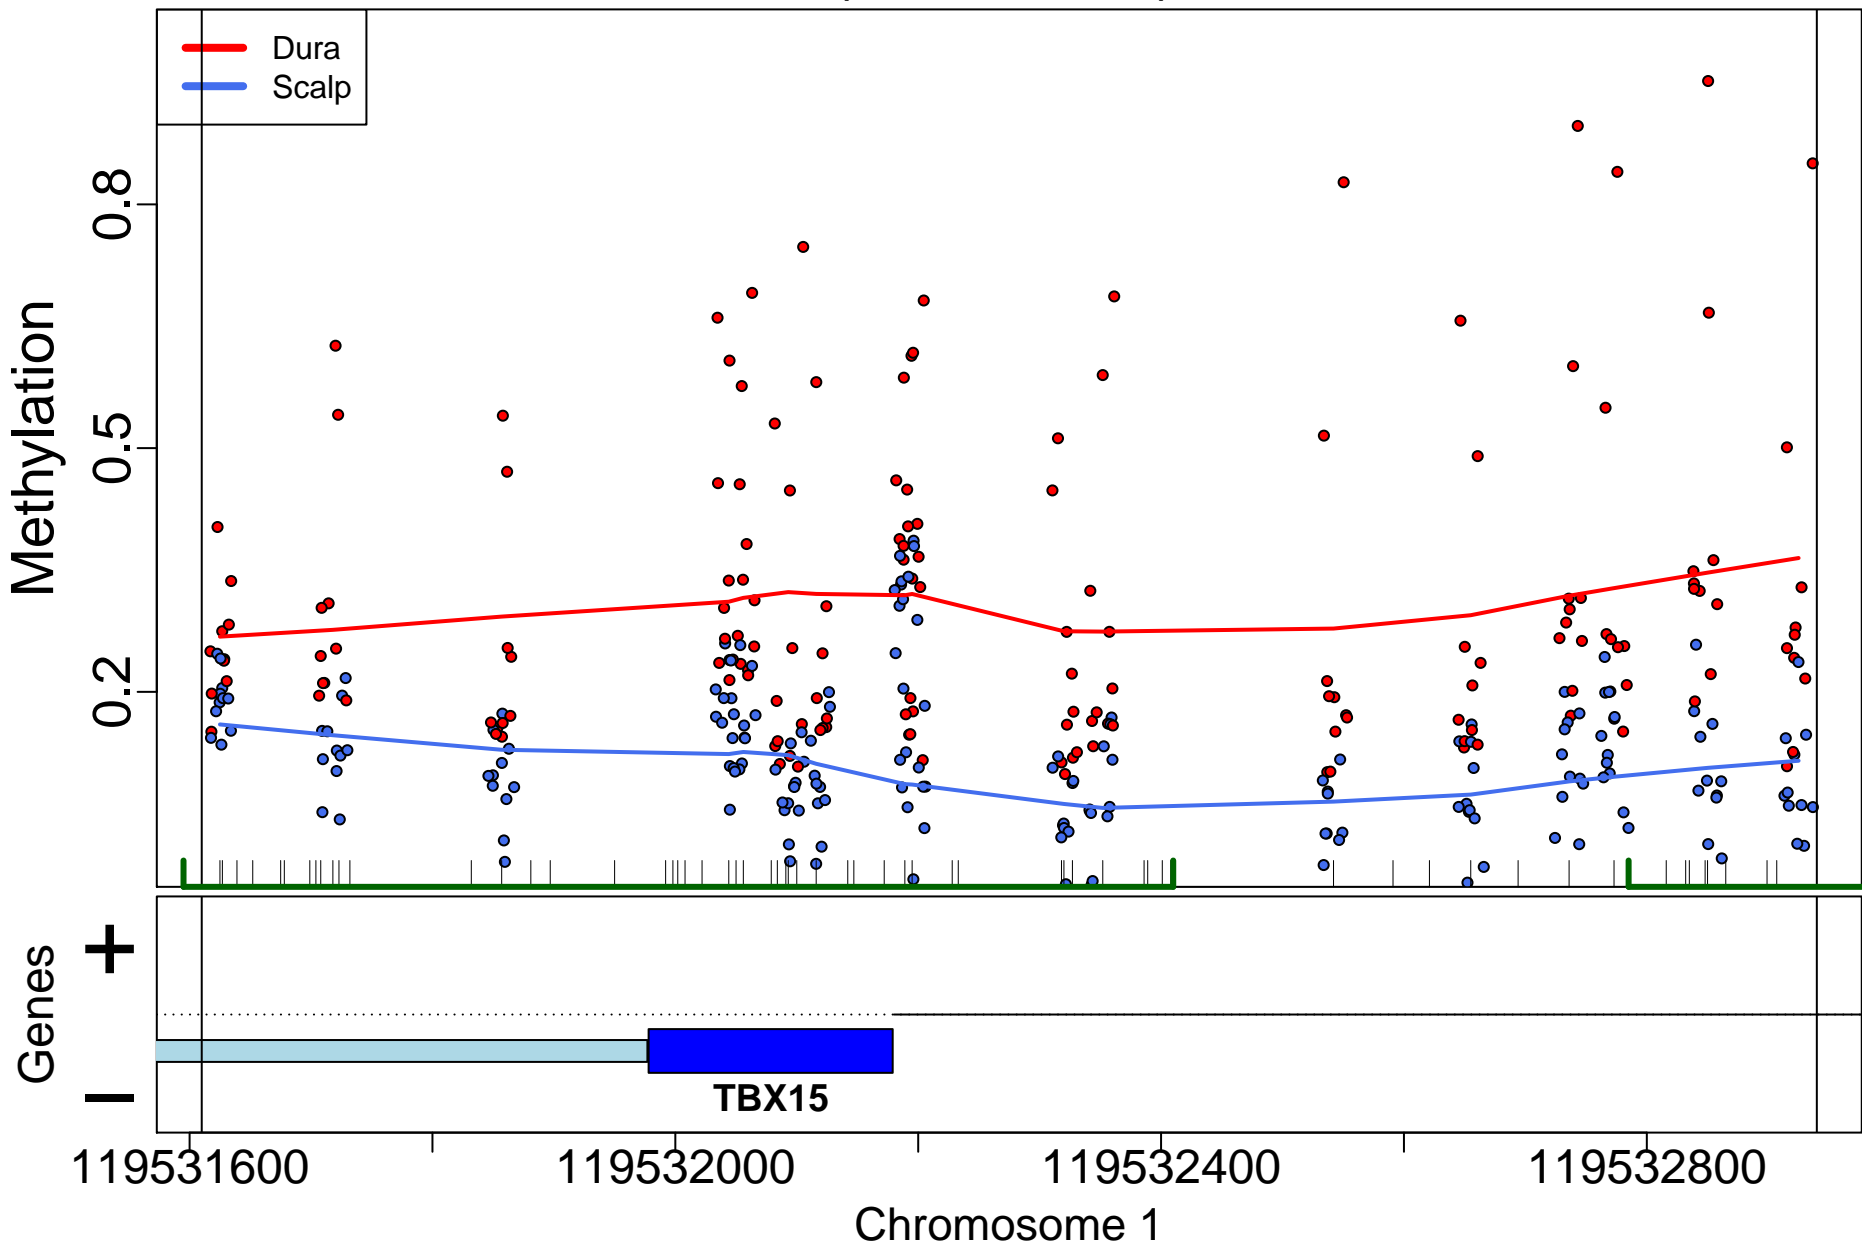

CHRM1; 0bp from tss:overlaps 5'

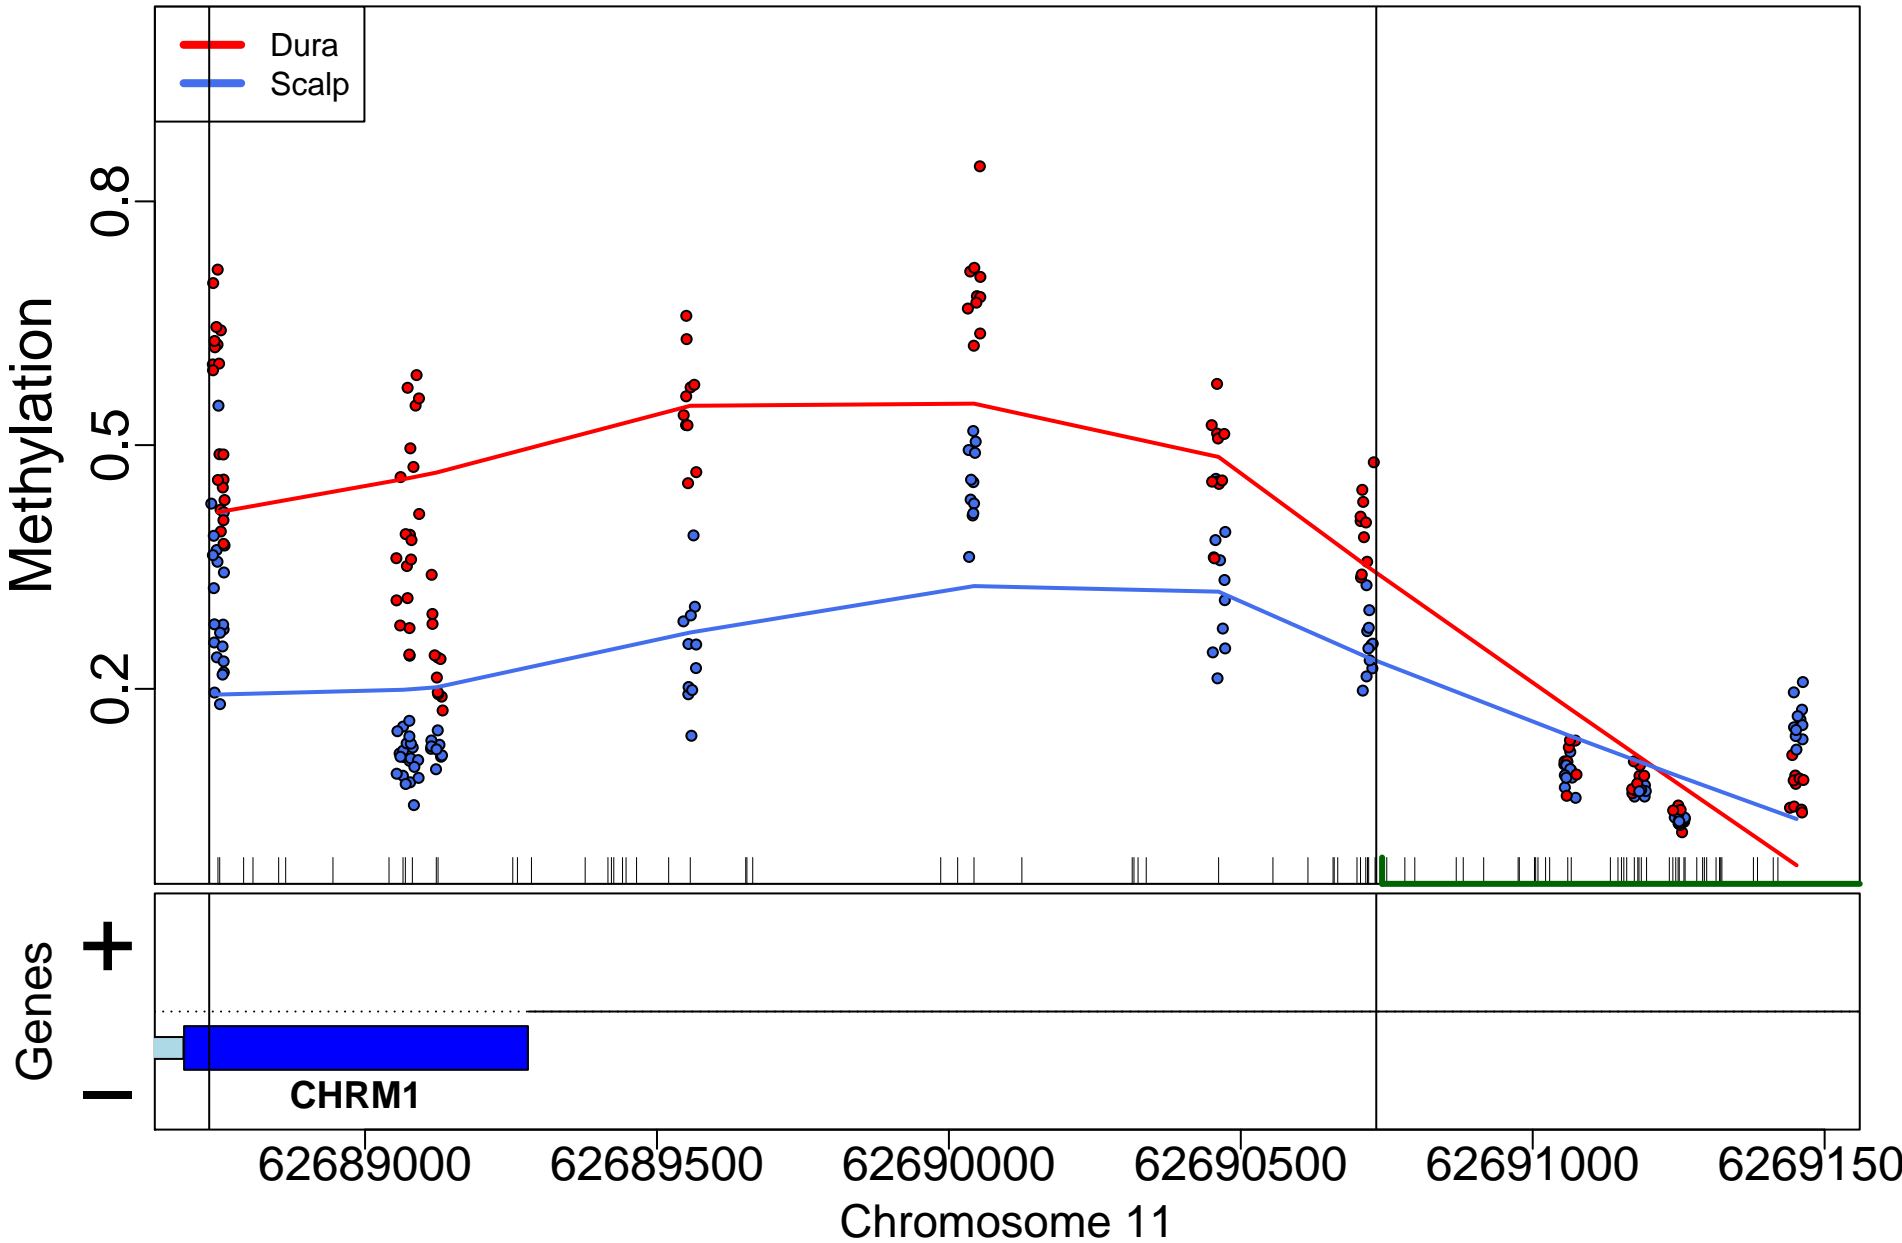

## ALX3; 848bp from tss:inside intron

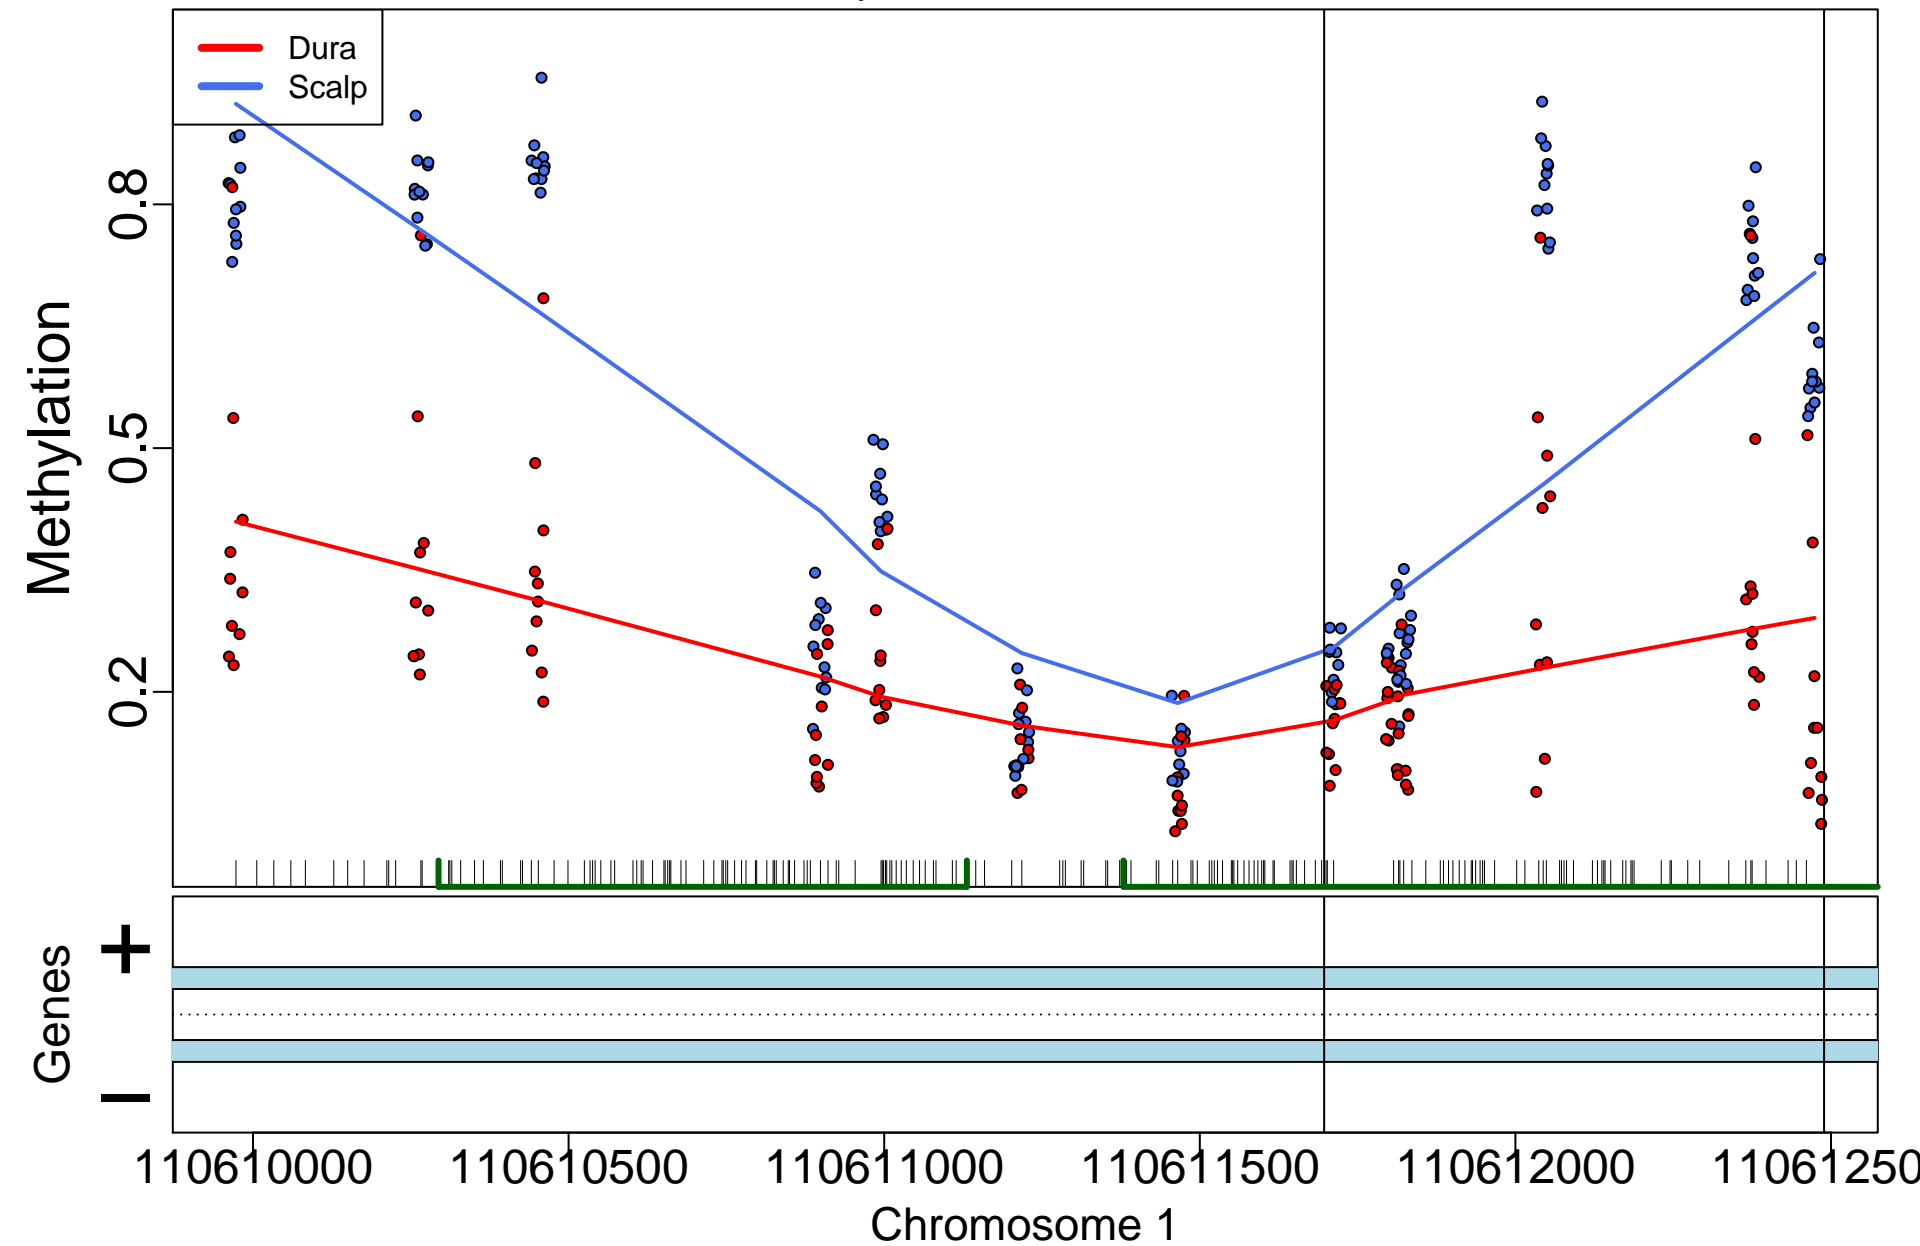

YWHAH; 494bp from tss:inside intron

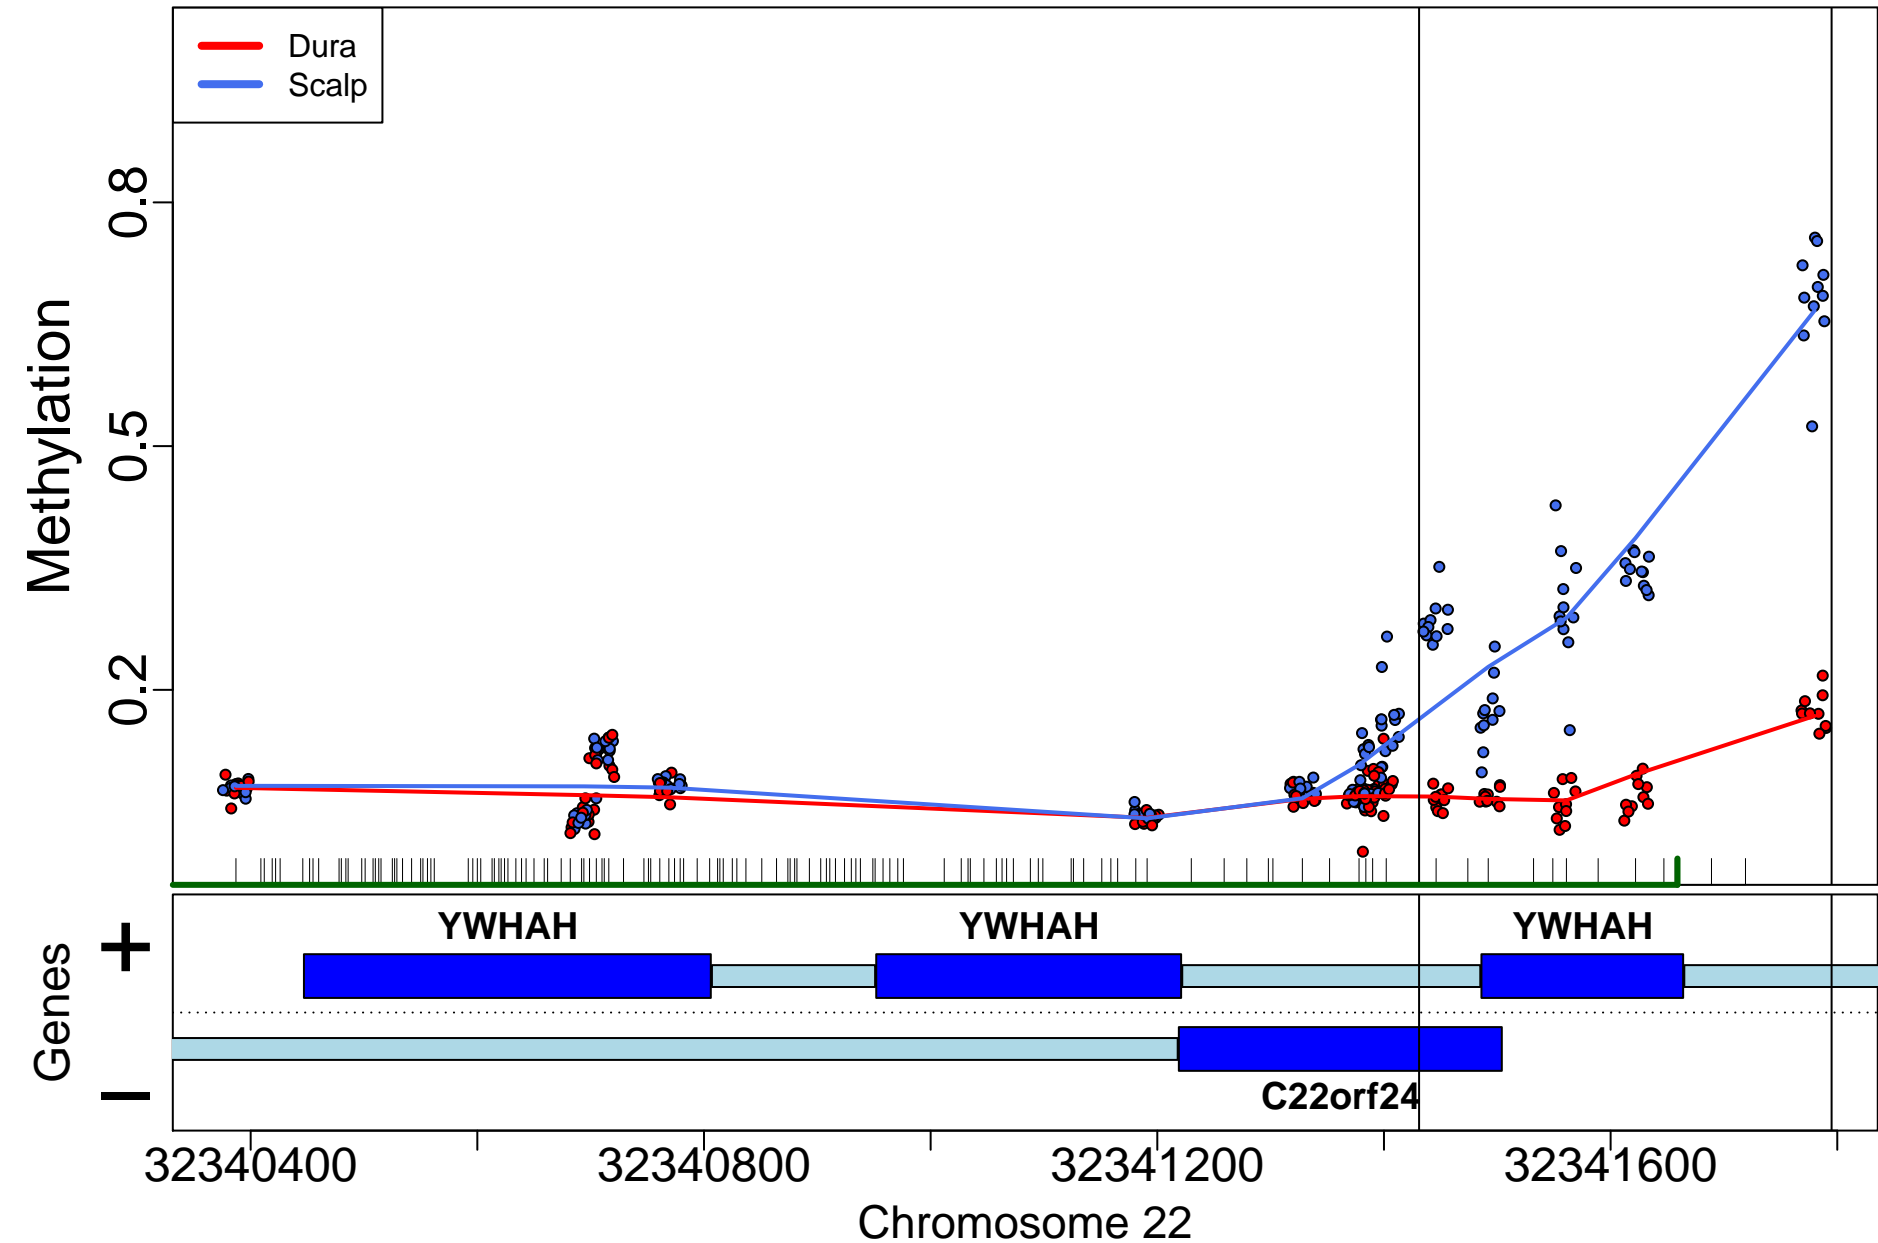

PAX1; 217bp from tss:promoter

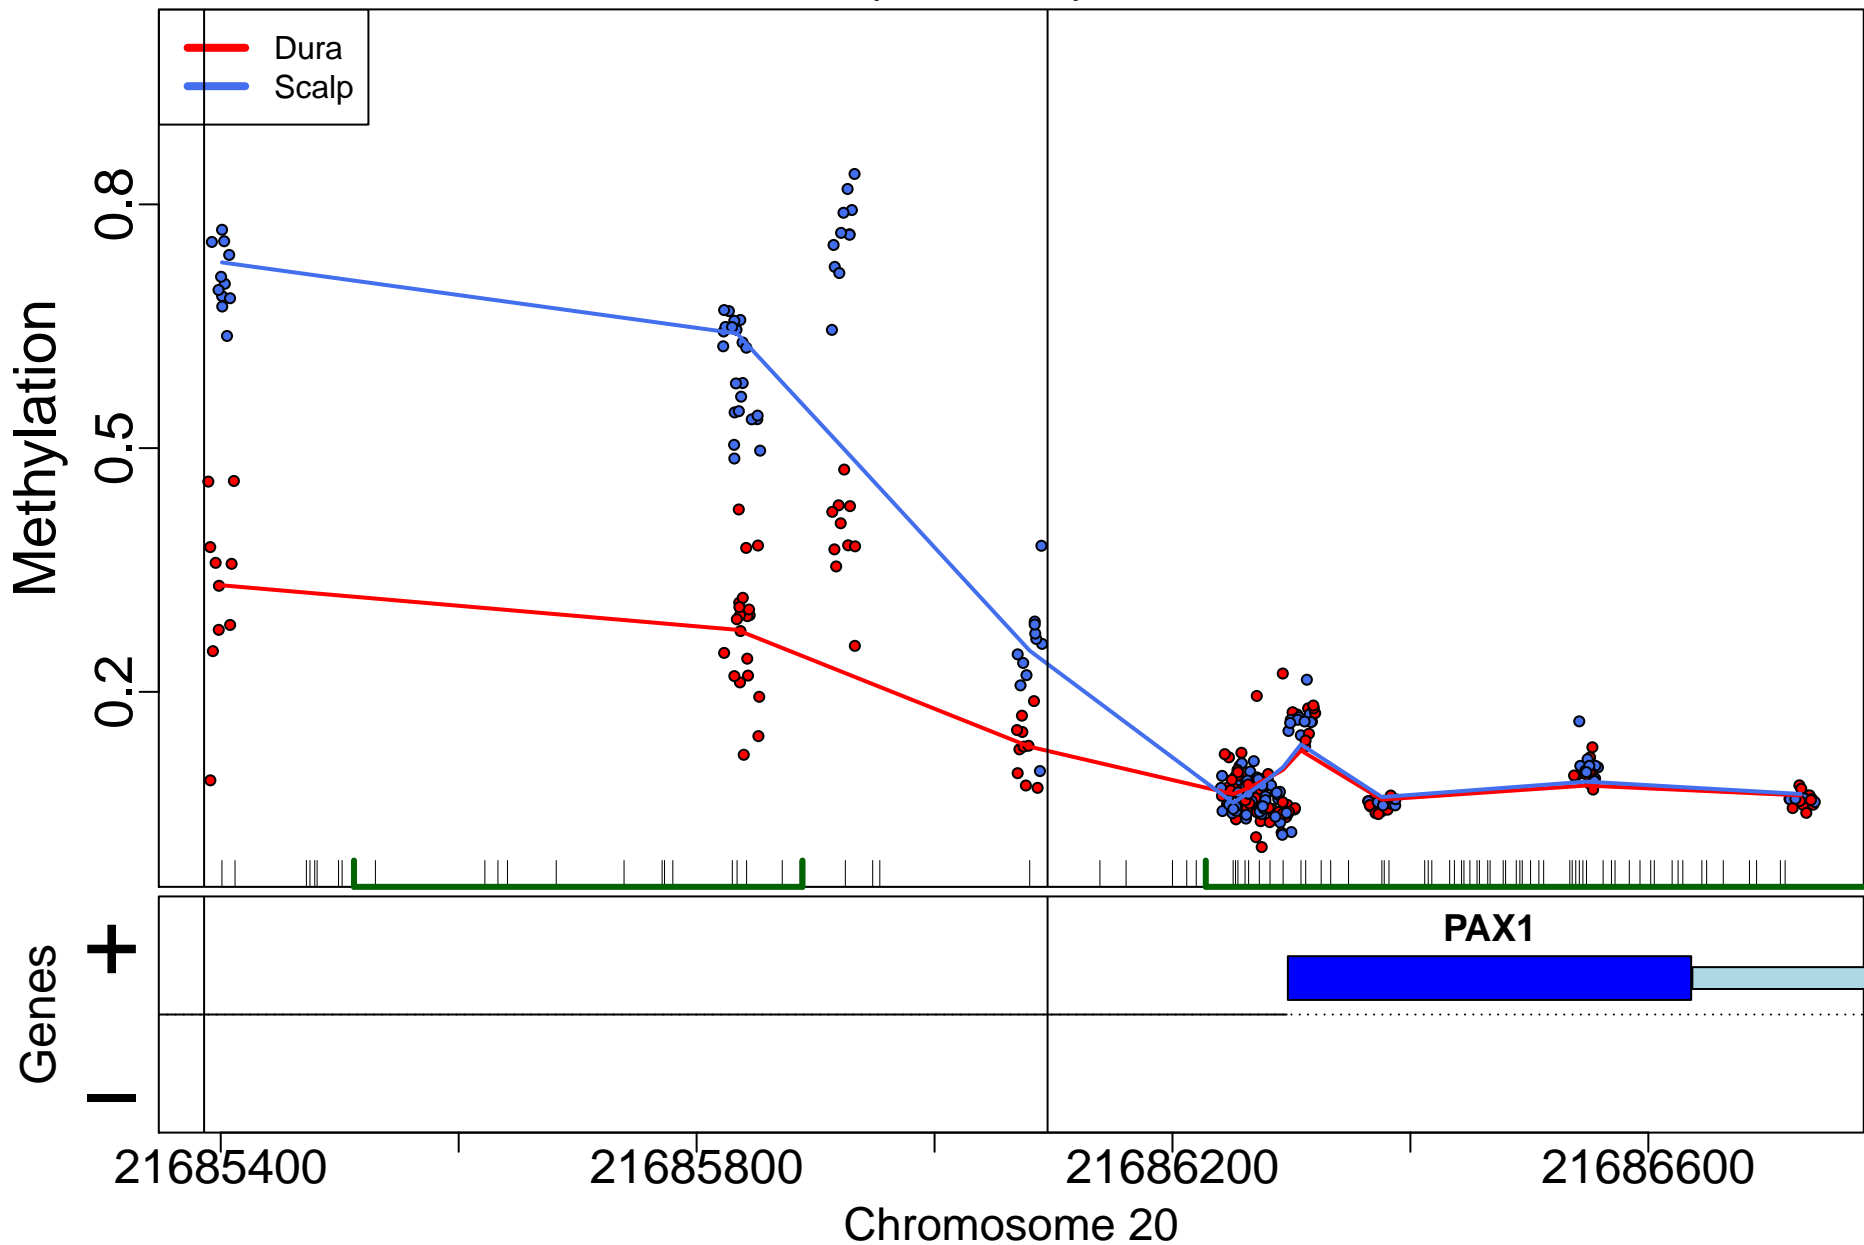



# HOTTIP; 0bp from tss:NA

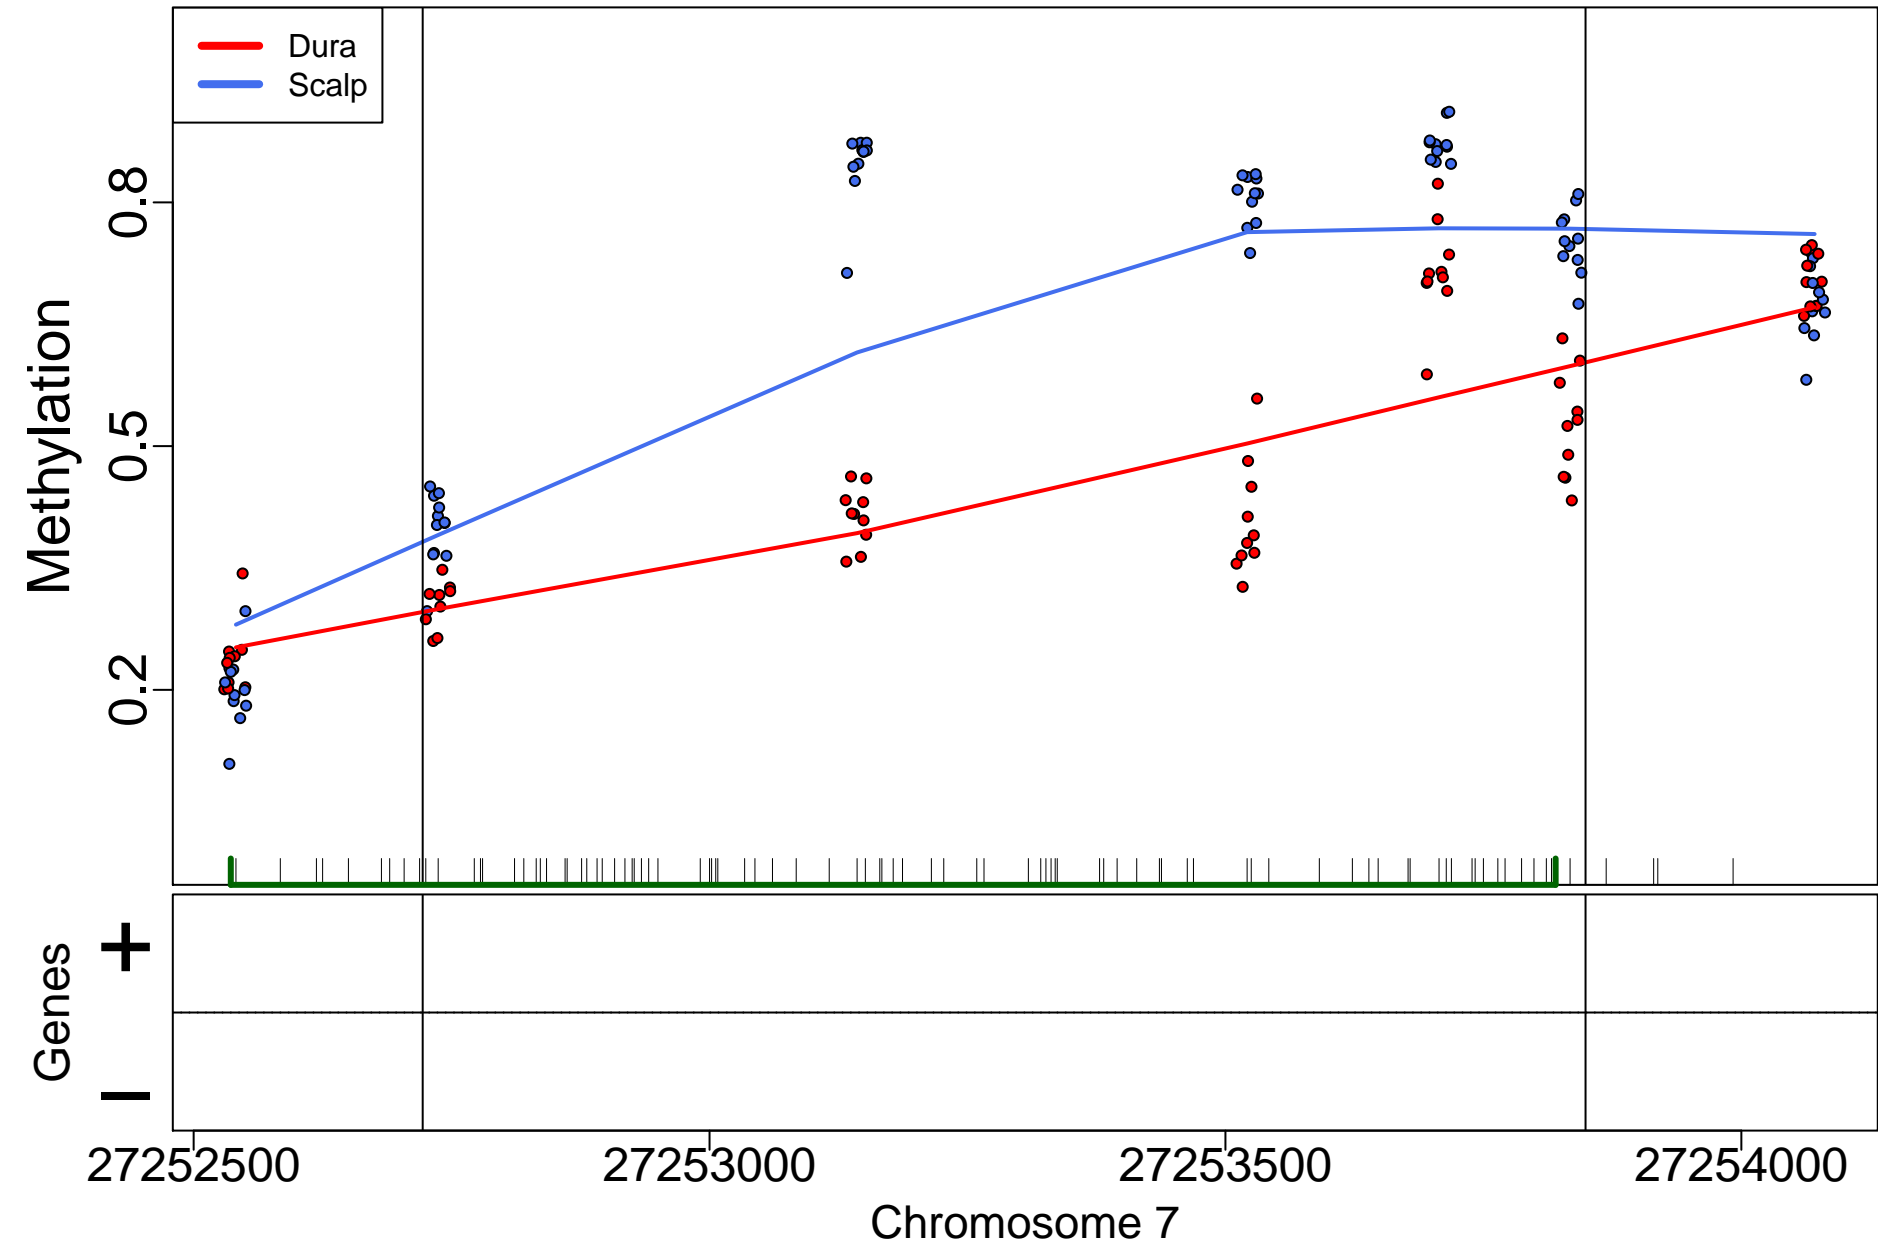

## EMX2OS; 0bp from tss:NA

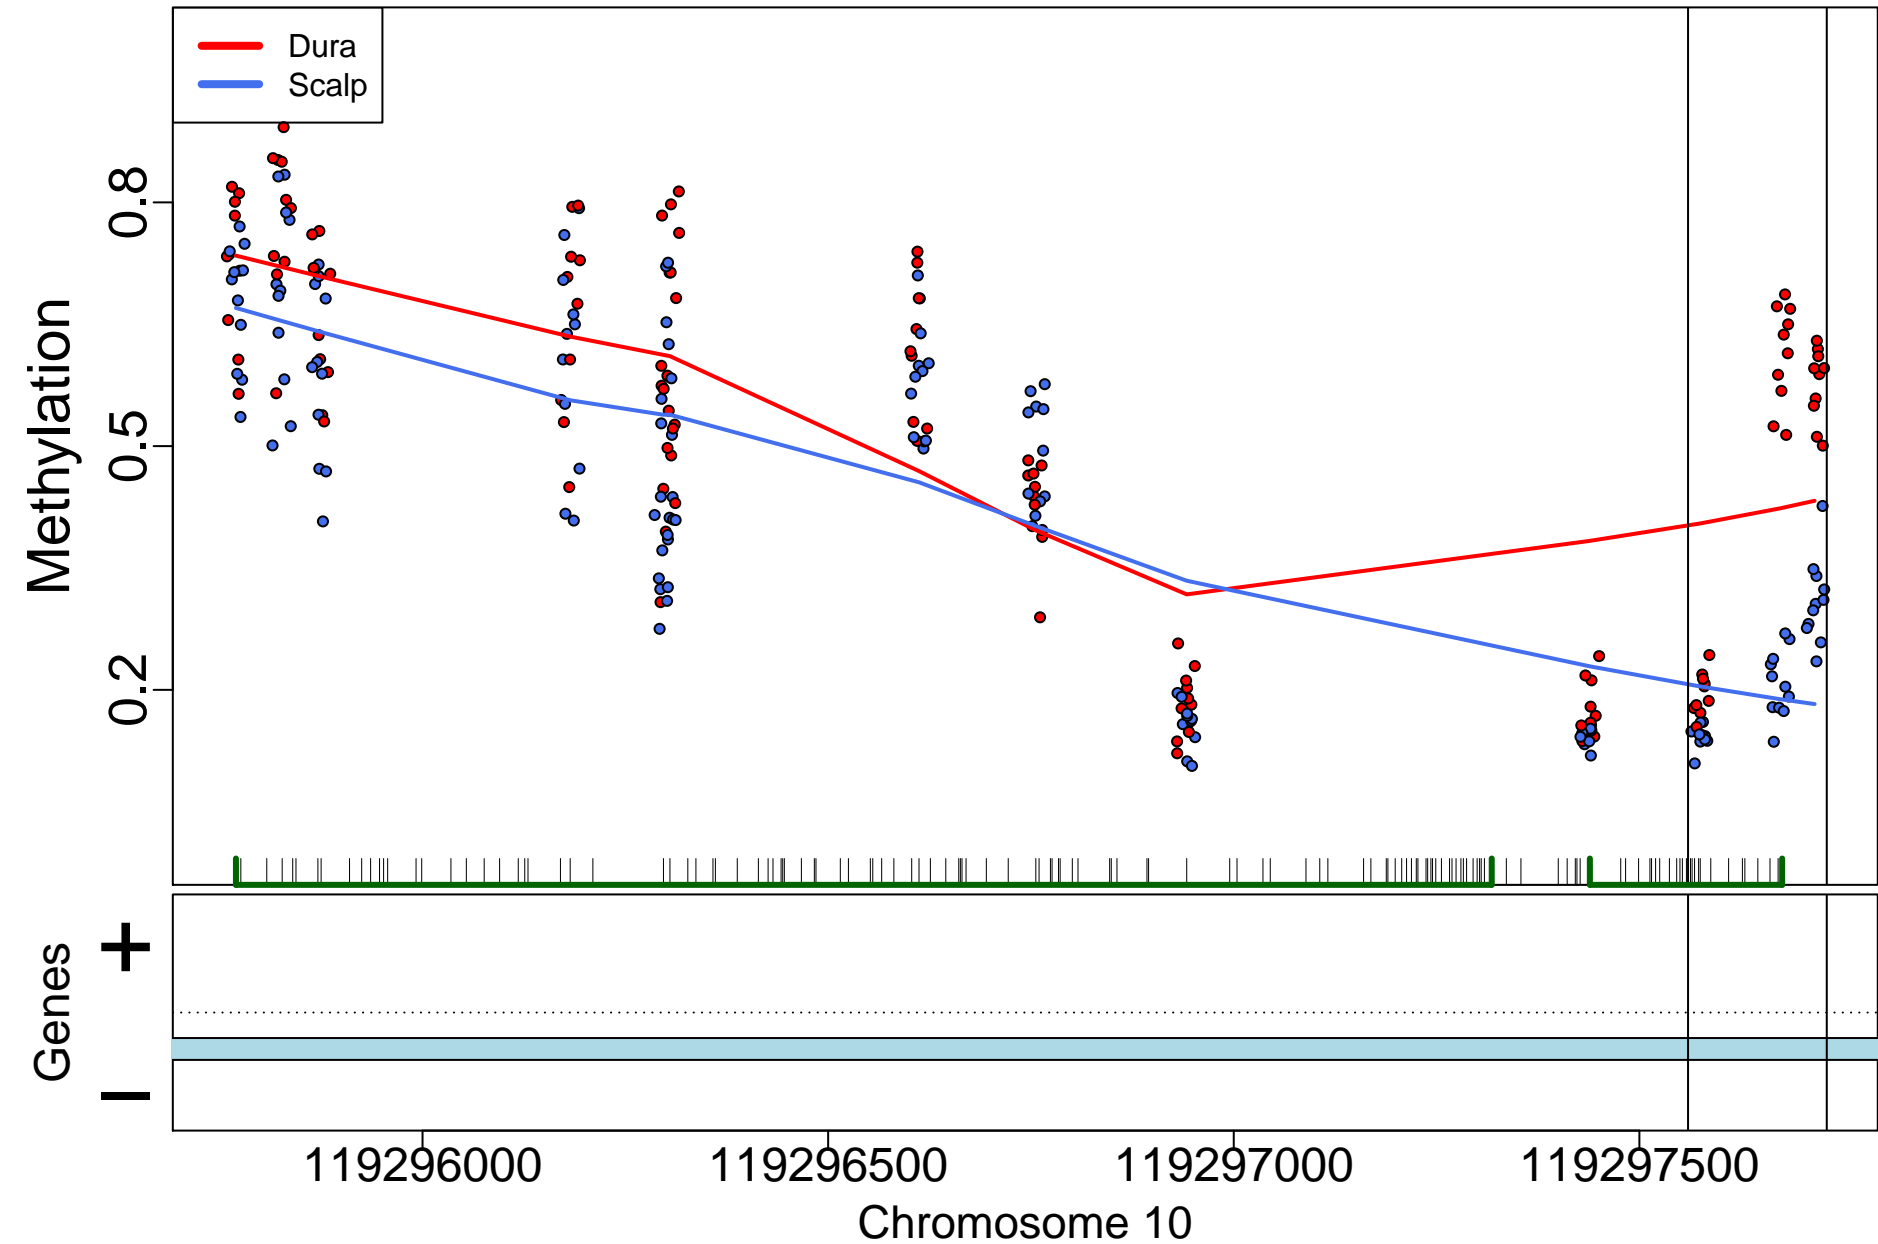

IRX2; 213863bp from tss:downstream

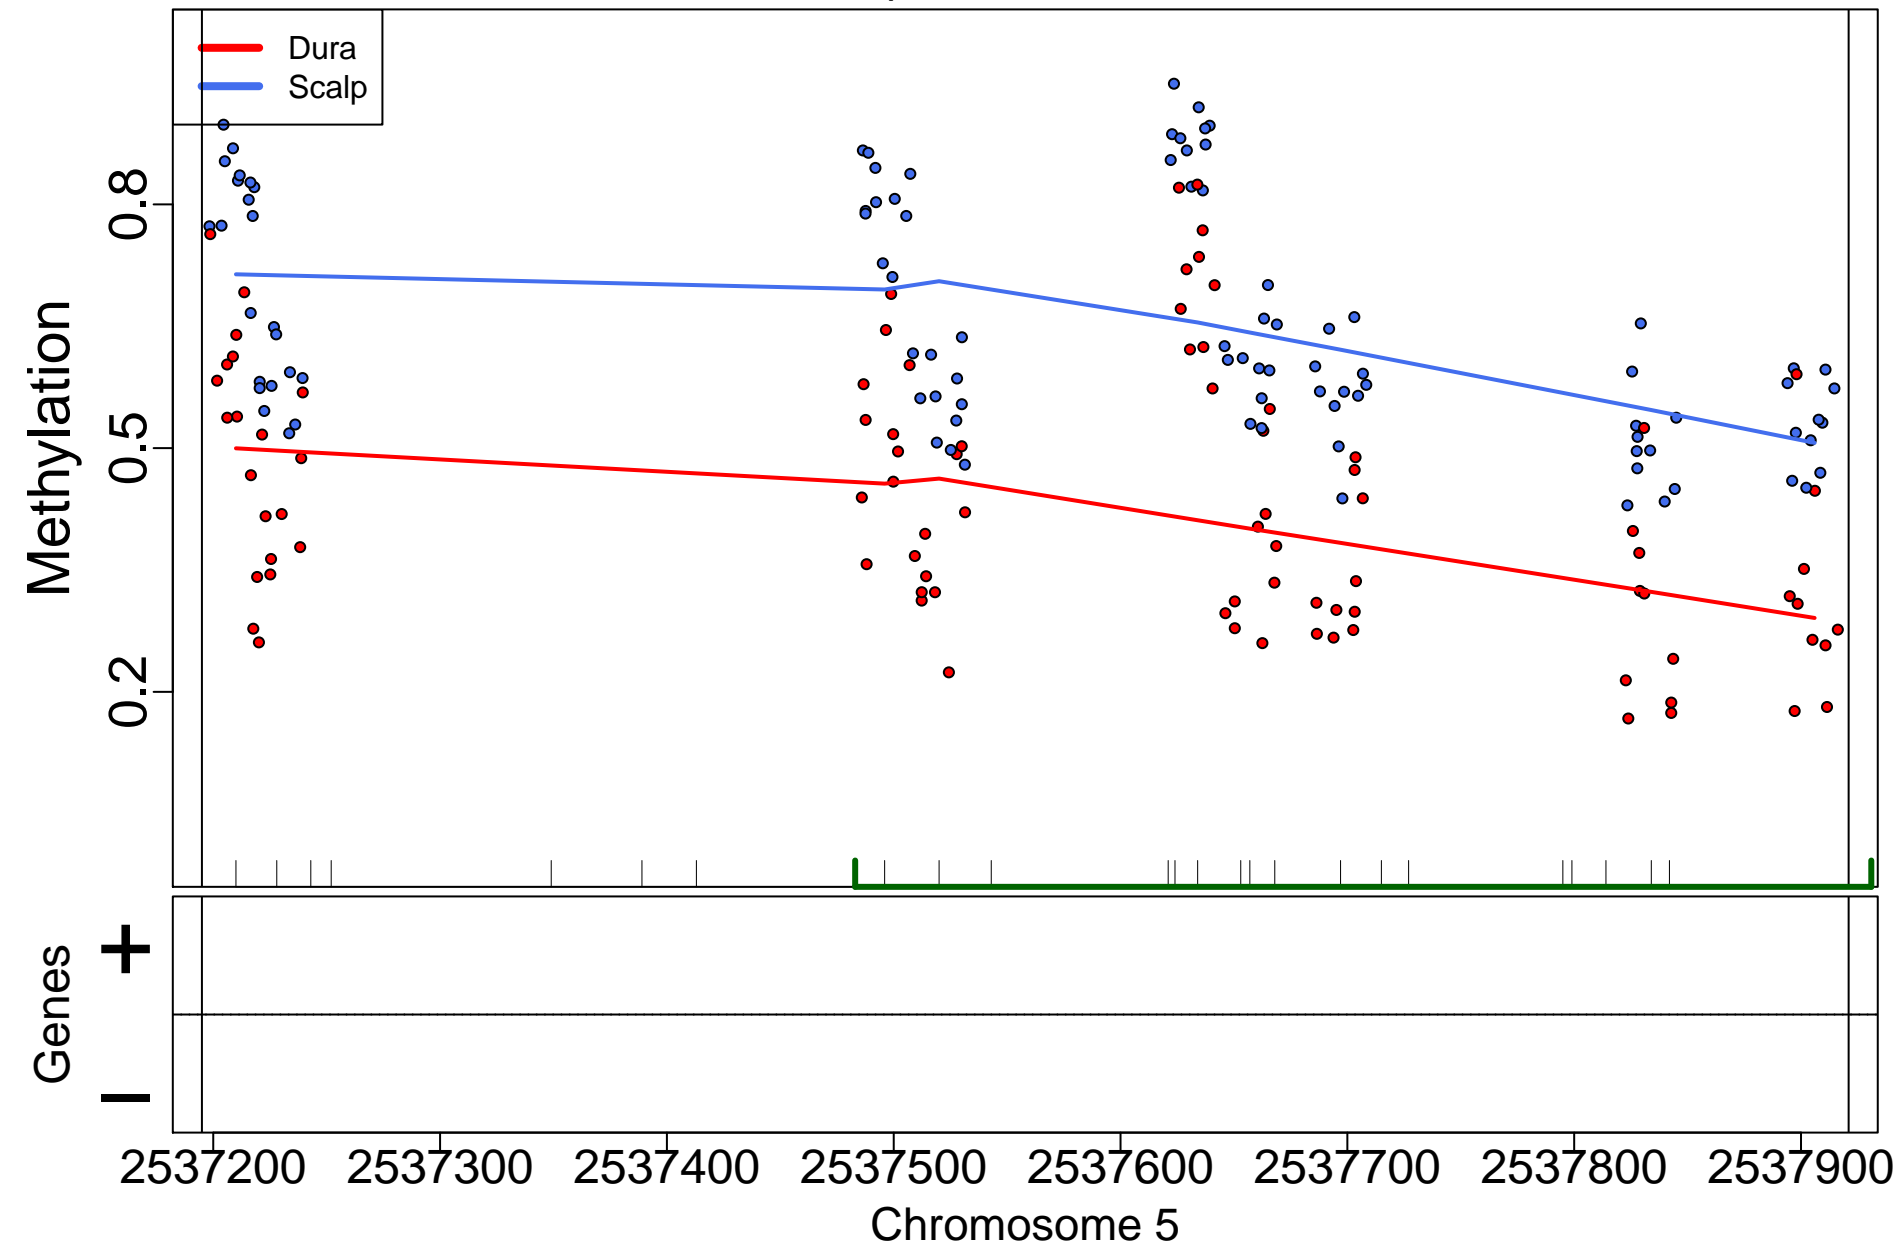

## LYNX1; 0bp from tss:overlaps 5'

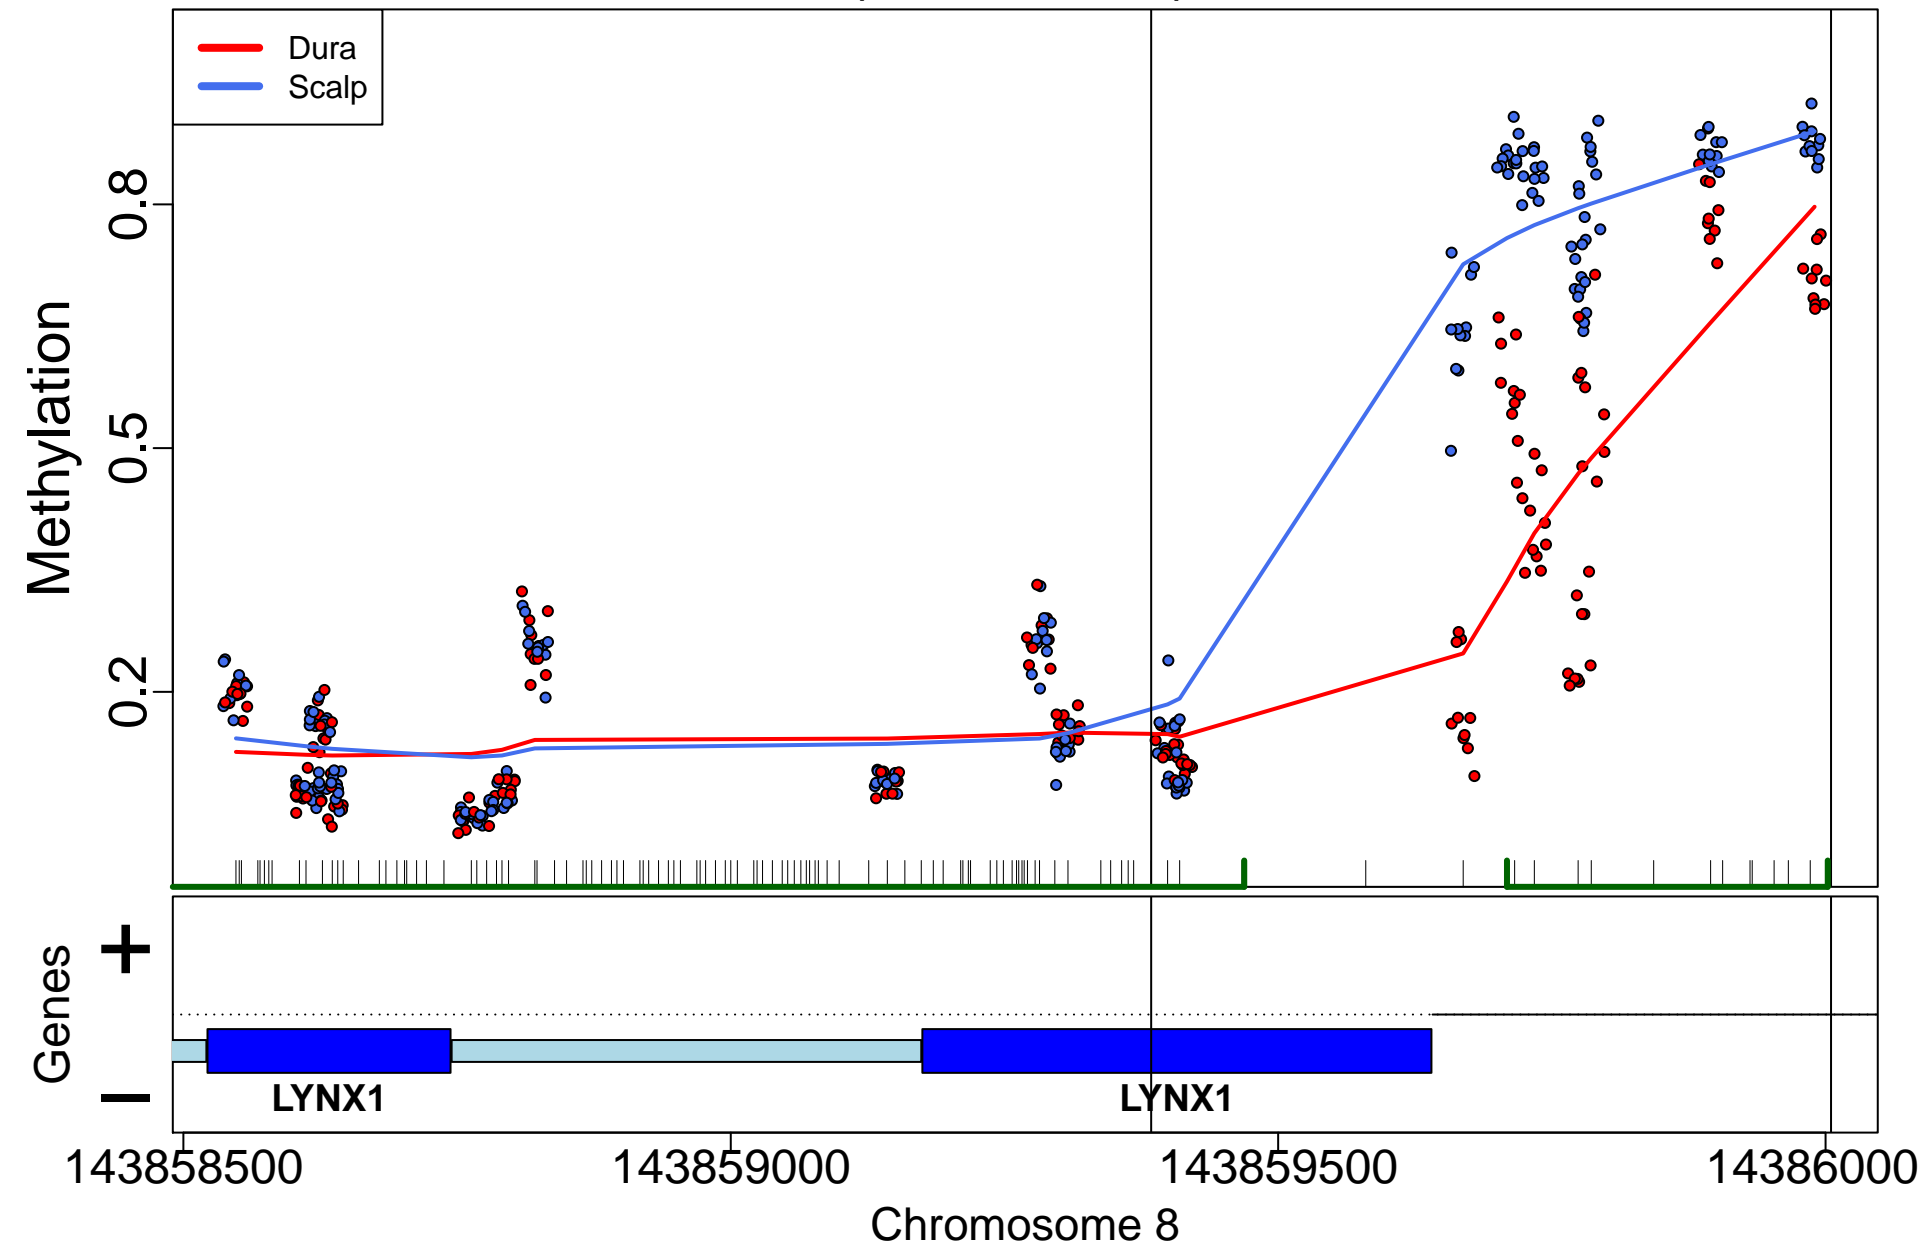

C7orf65; 0bp from tss:overlaps 5'

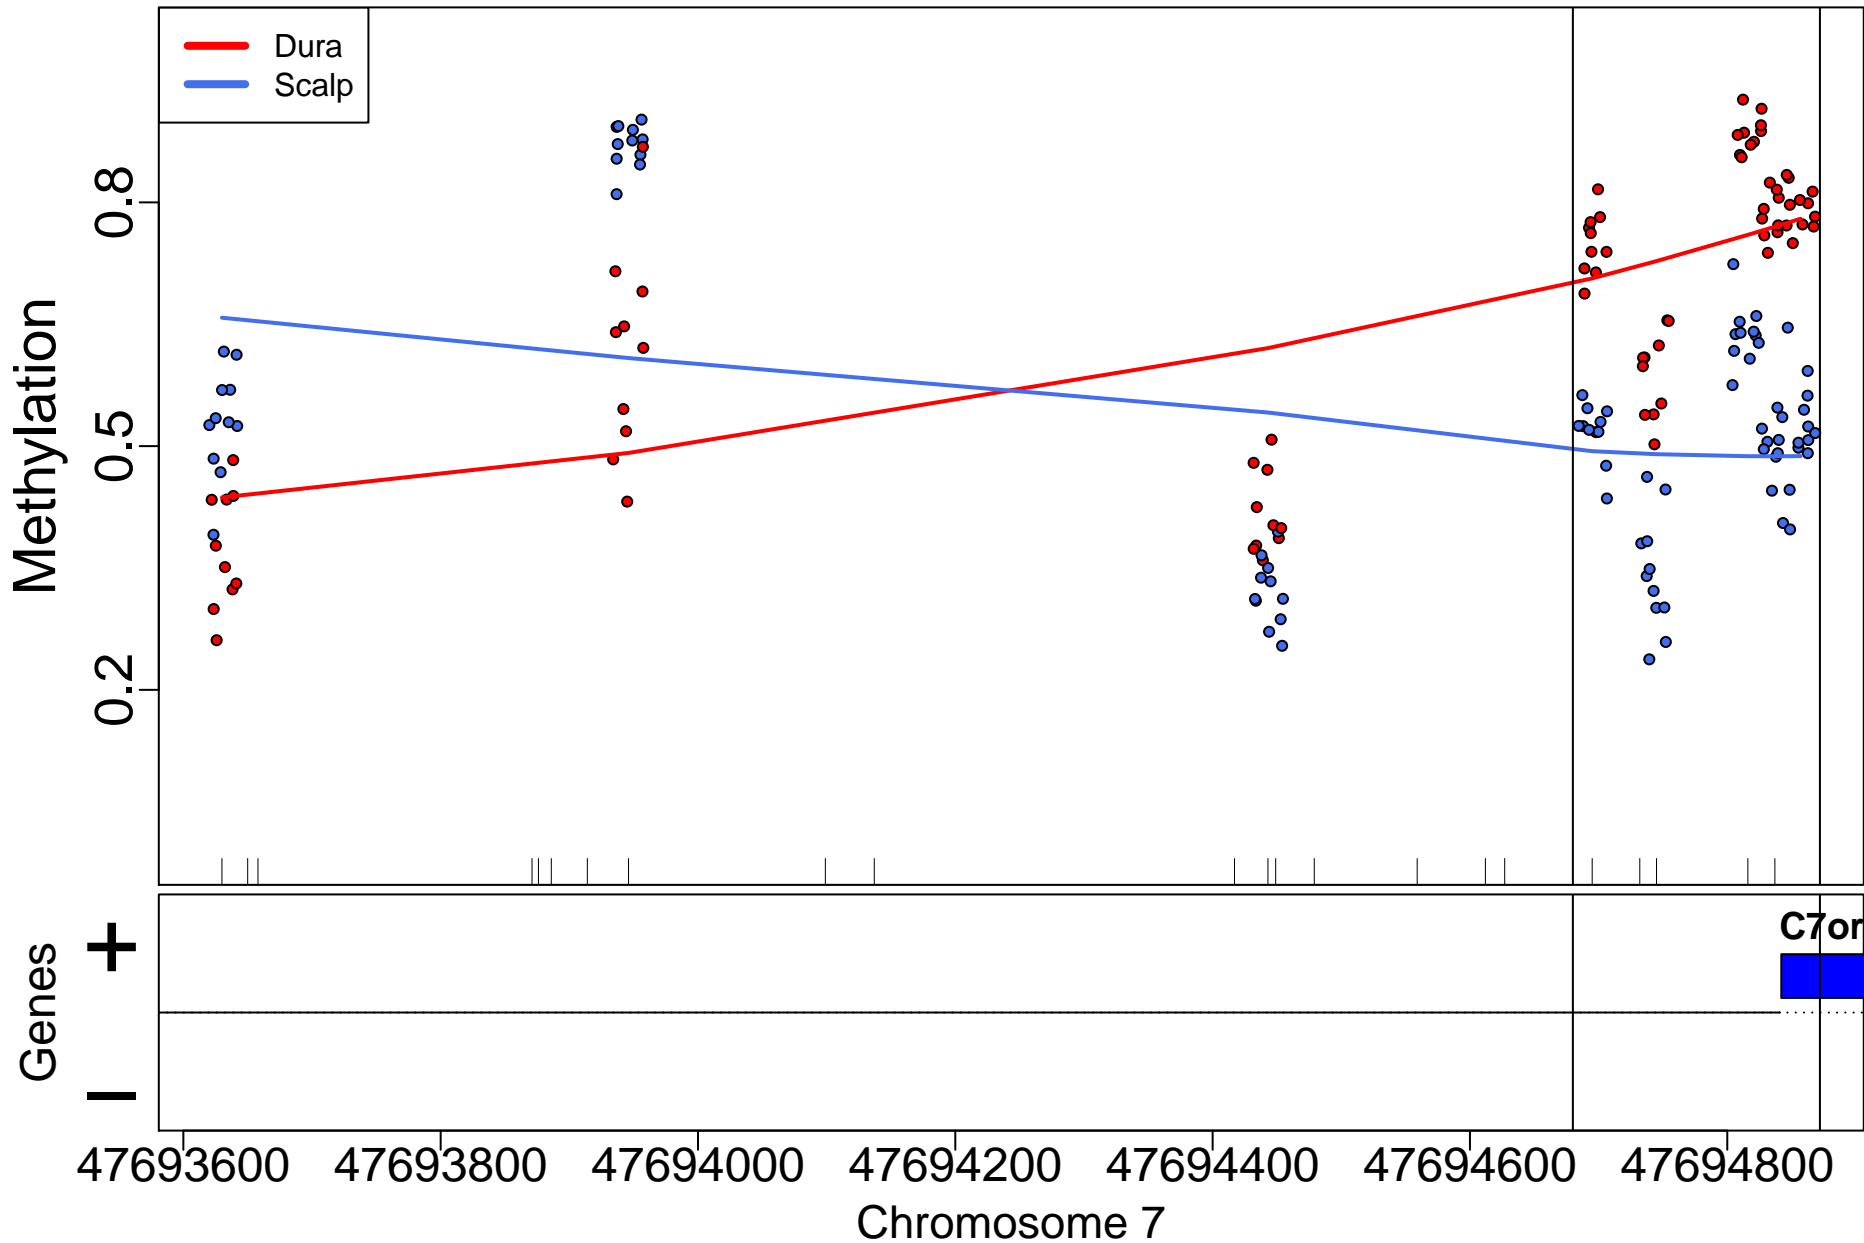

EIF3H; 425bp from tss:overlaps exon downstream

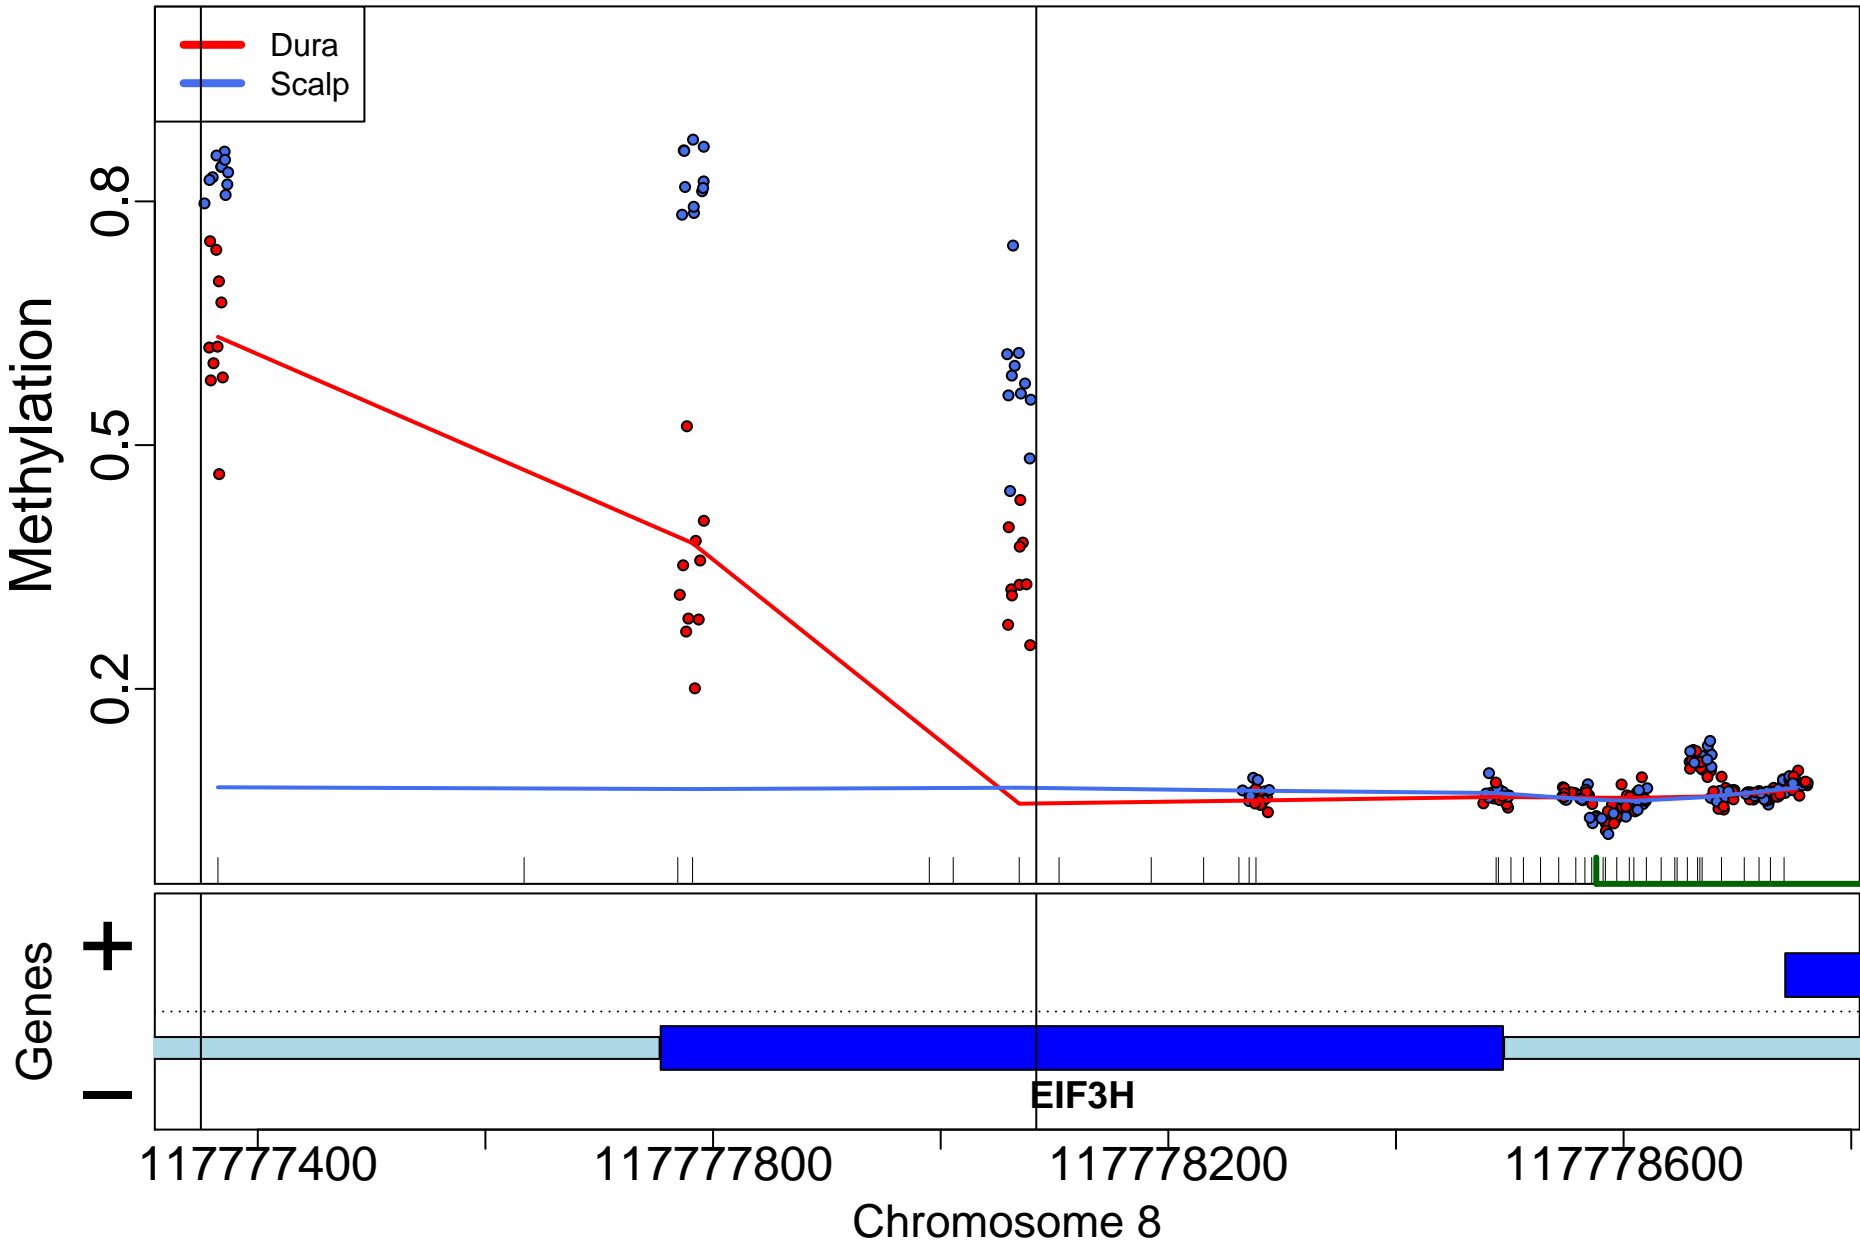

RTP5; 75167bp from tss:downstream

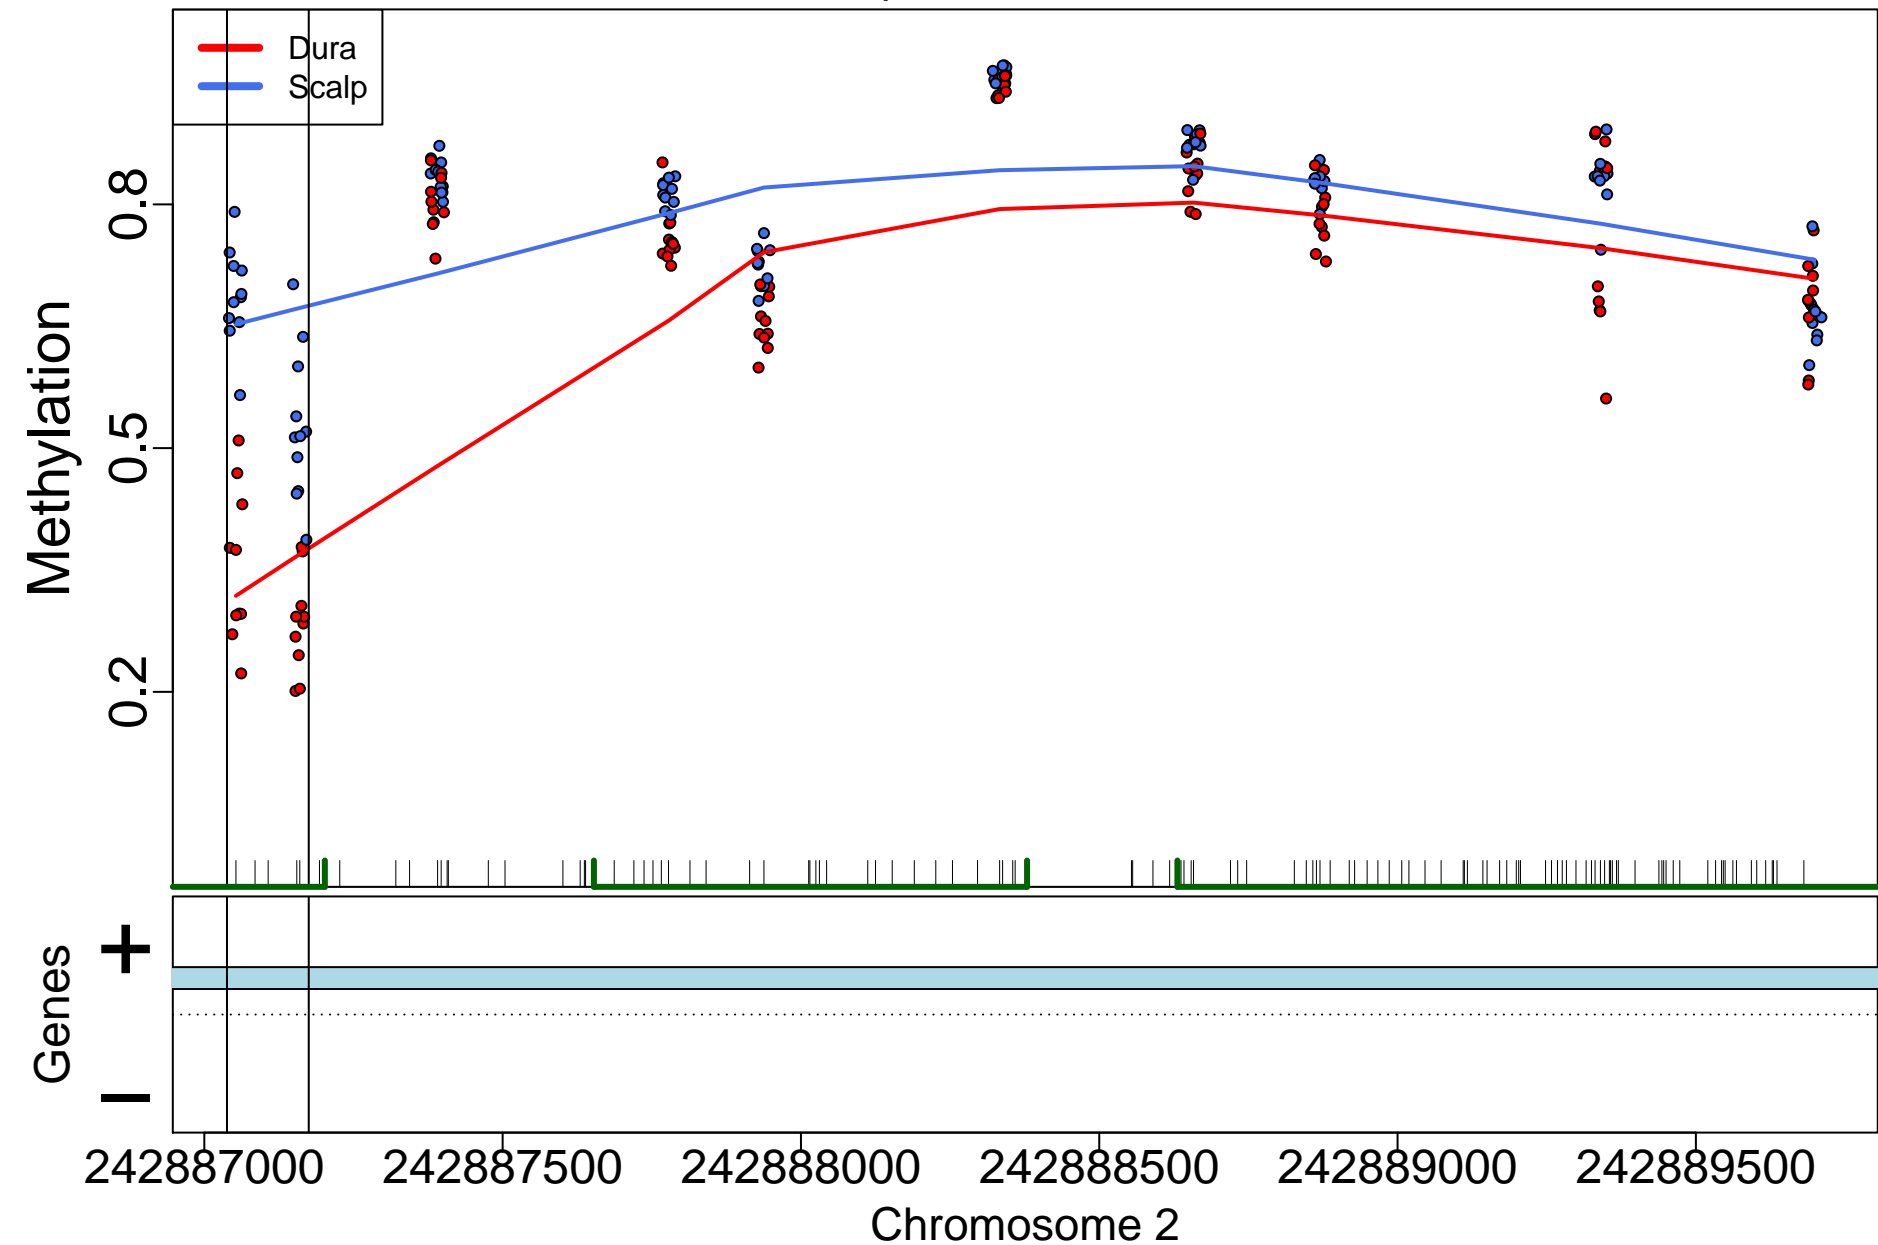

ADD2; 0bp from tss:NA

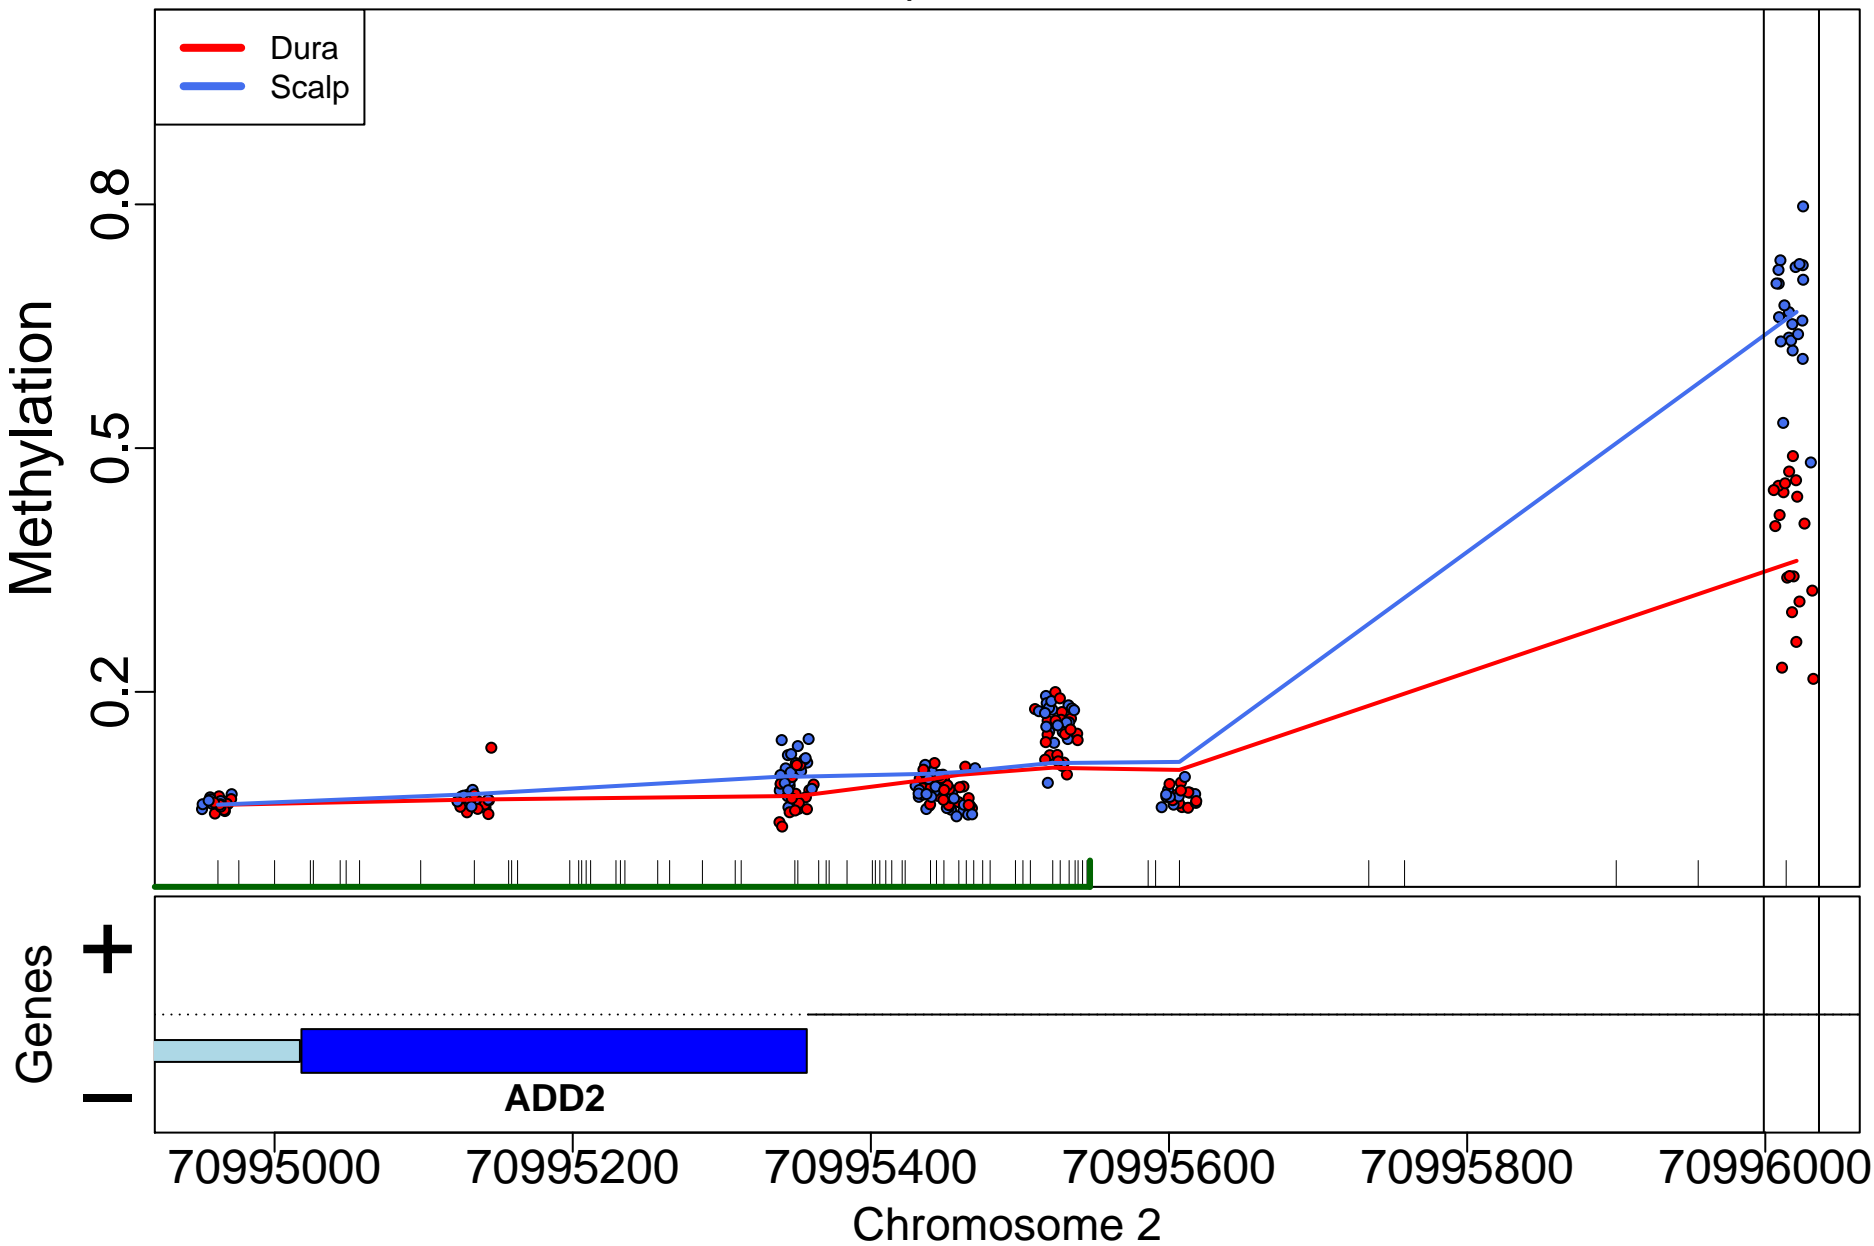



LSMEM1; 0bp from tss:overlaps 5'

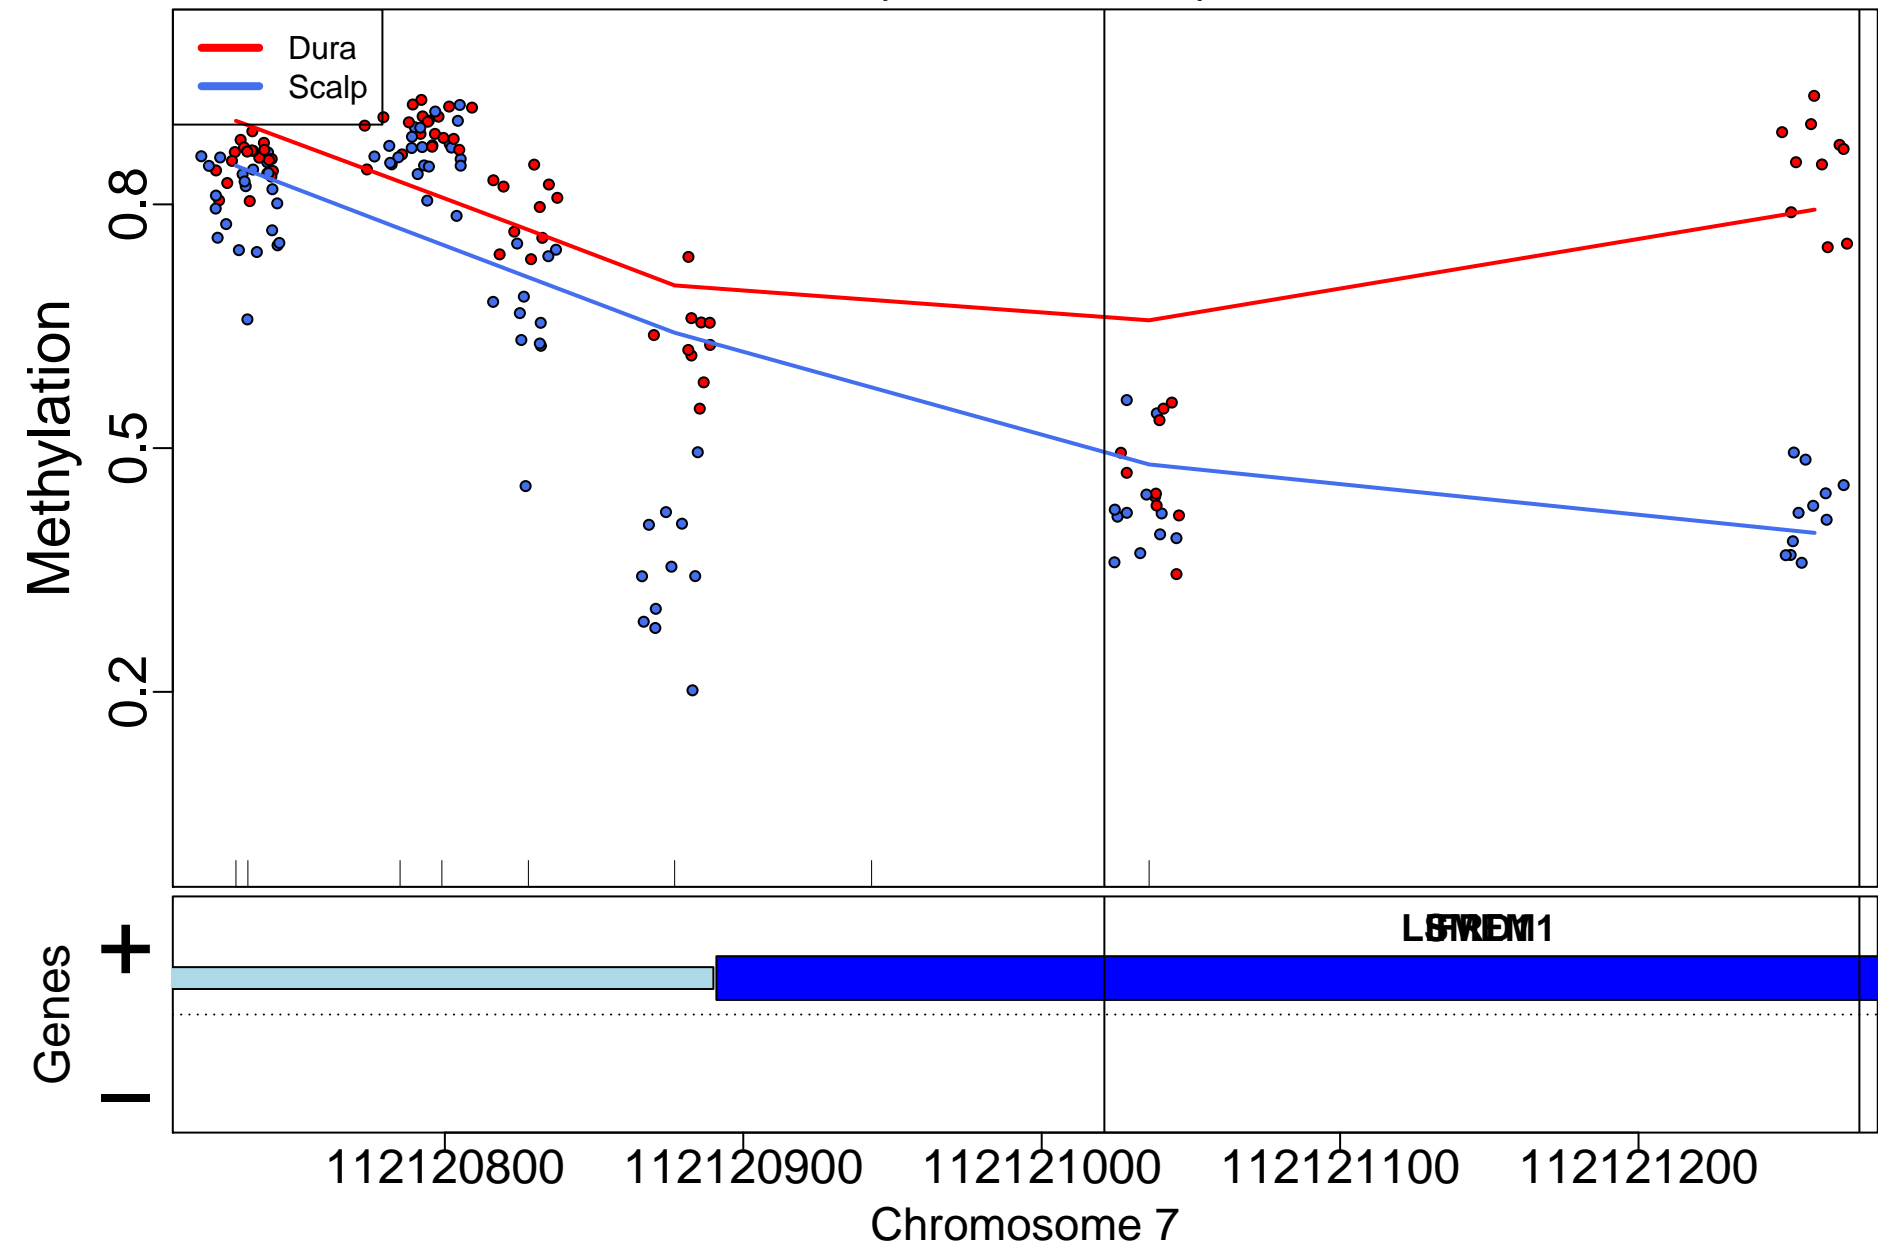

BTNL2; 1166bp from tss:promoter

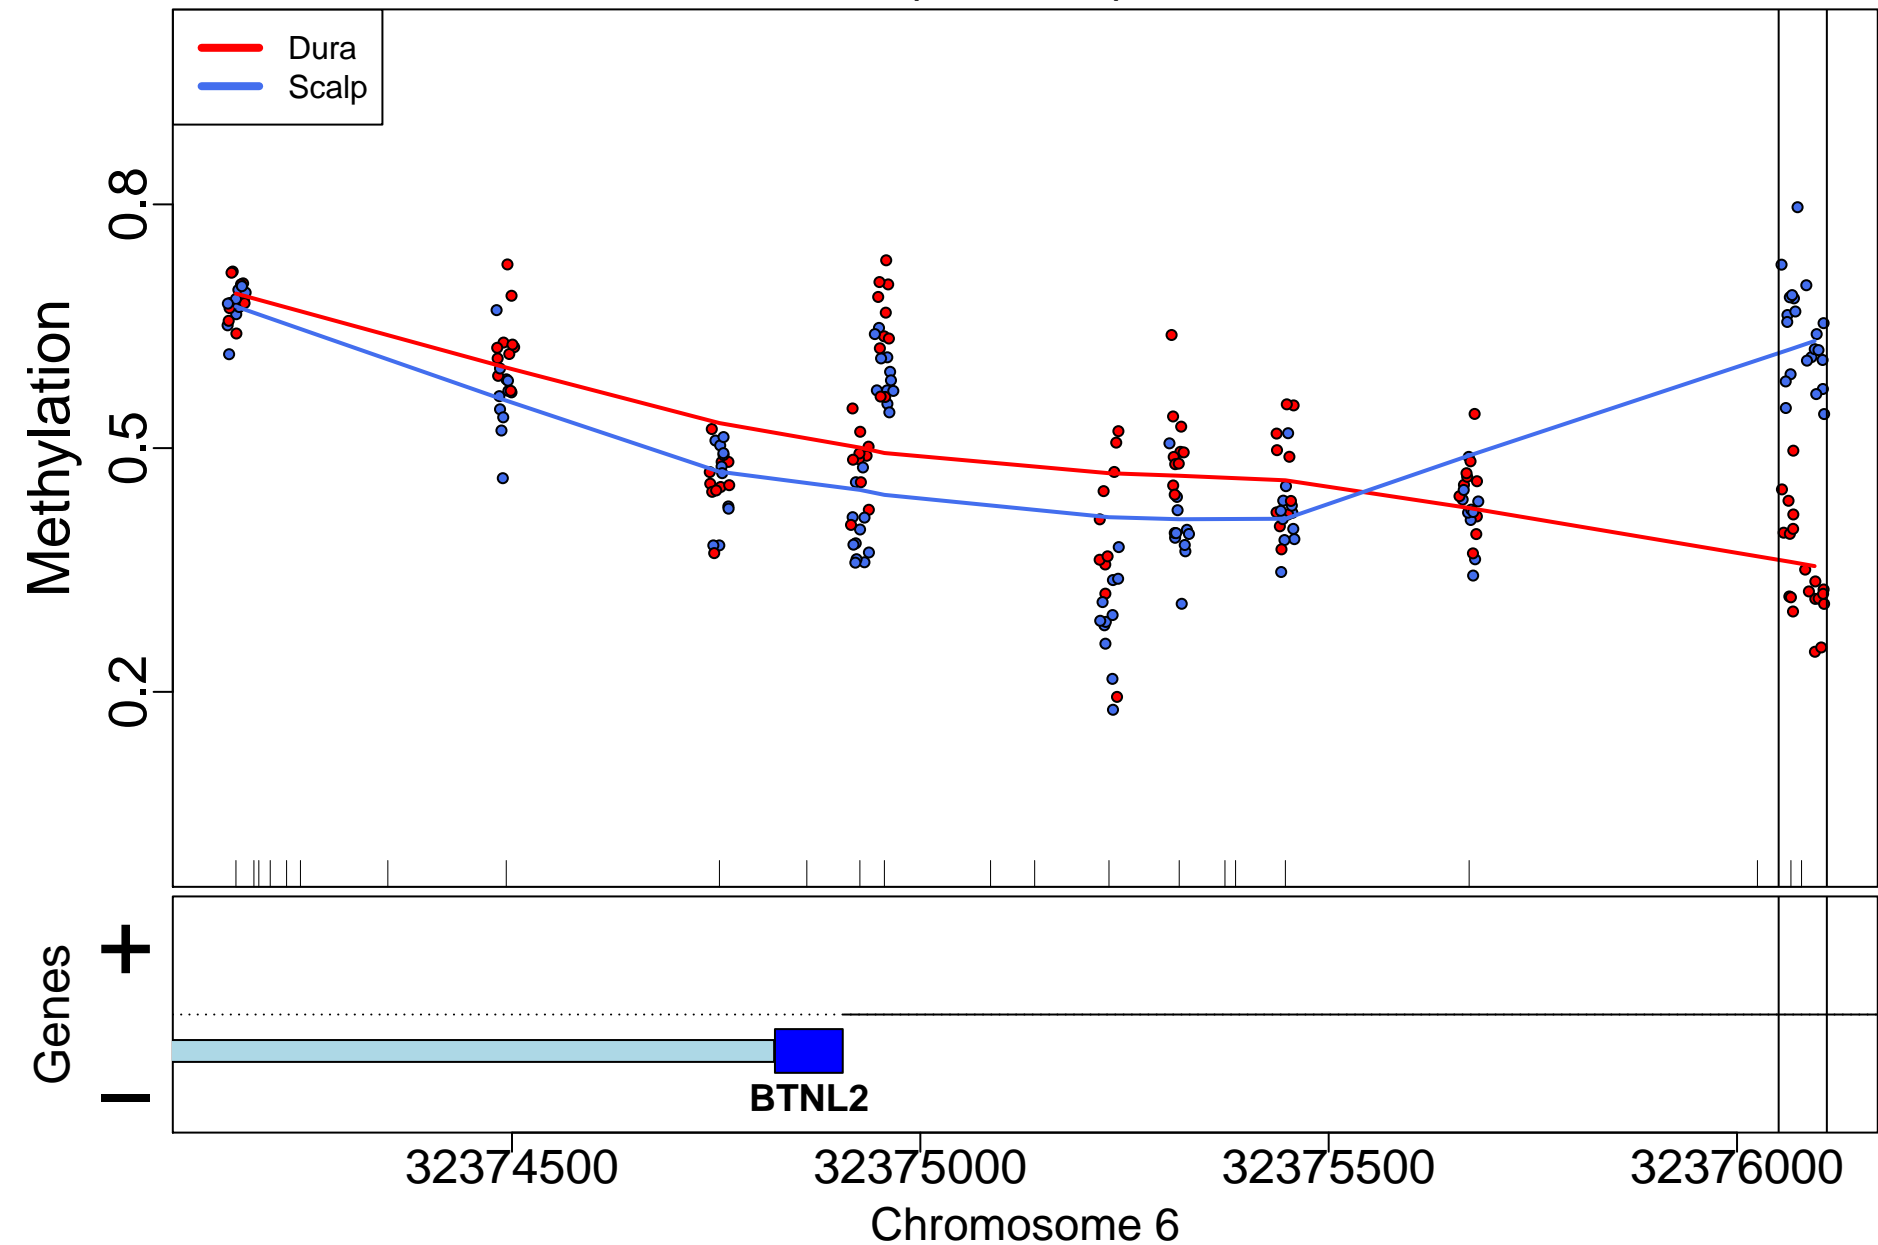

# EZR-AS1; 0bp from tss:NA

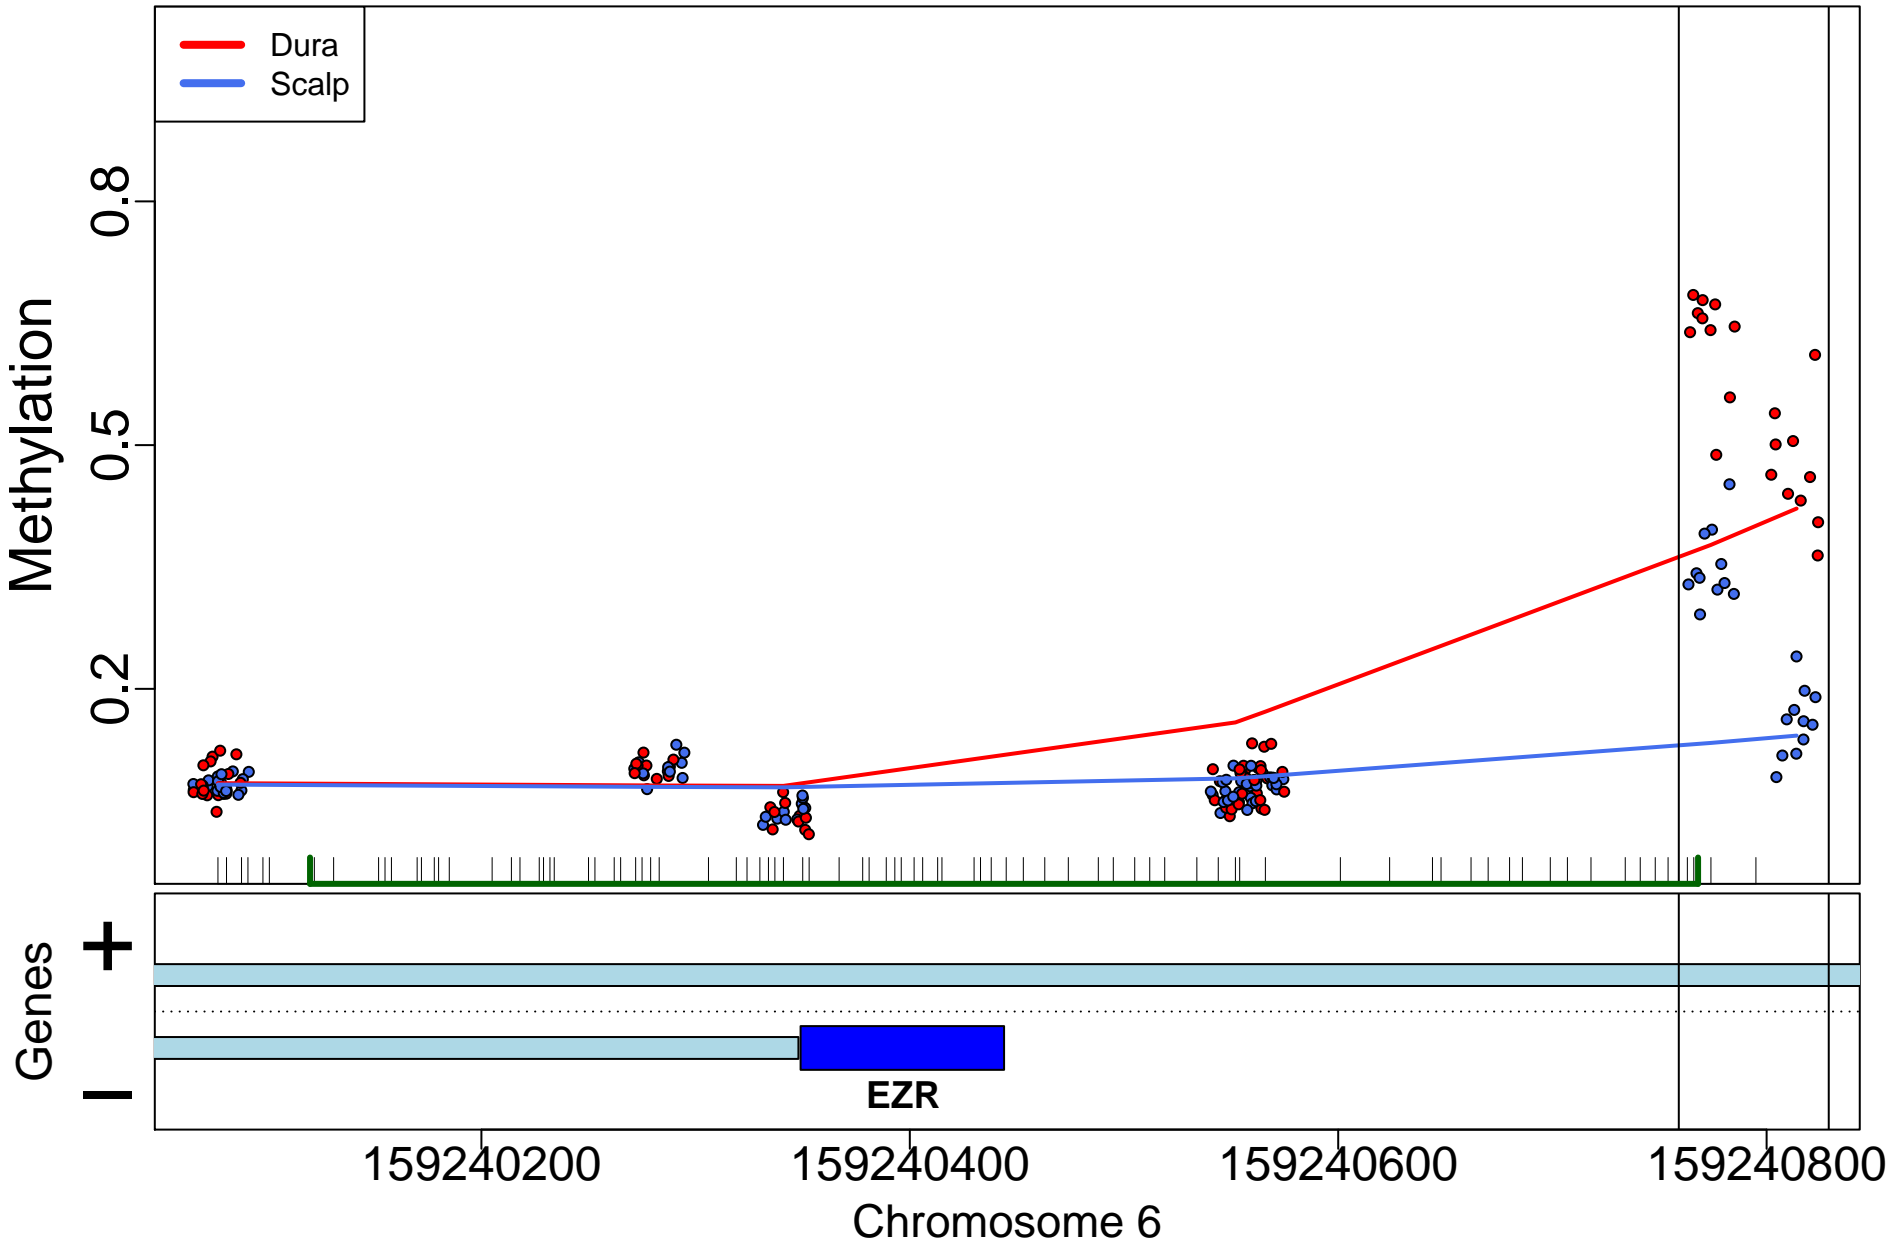

PRDM16; 69957bp from tss:inside intron

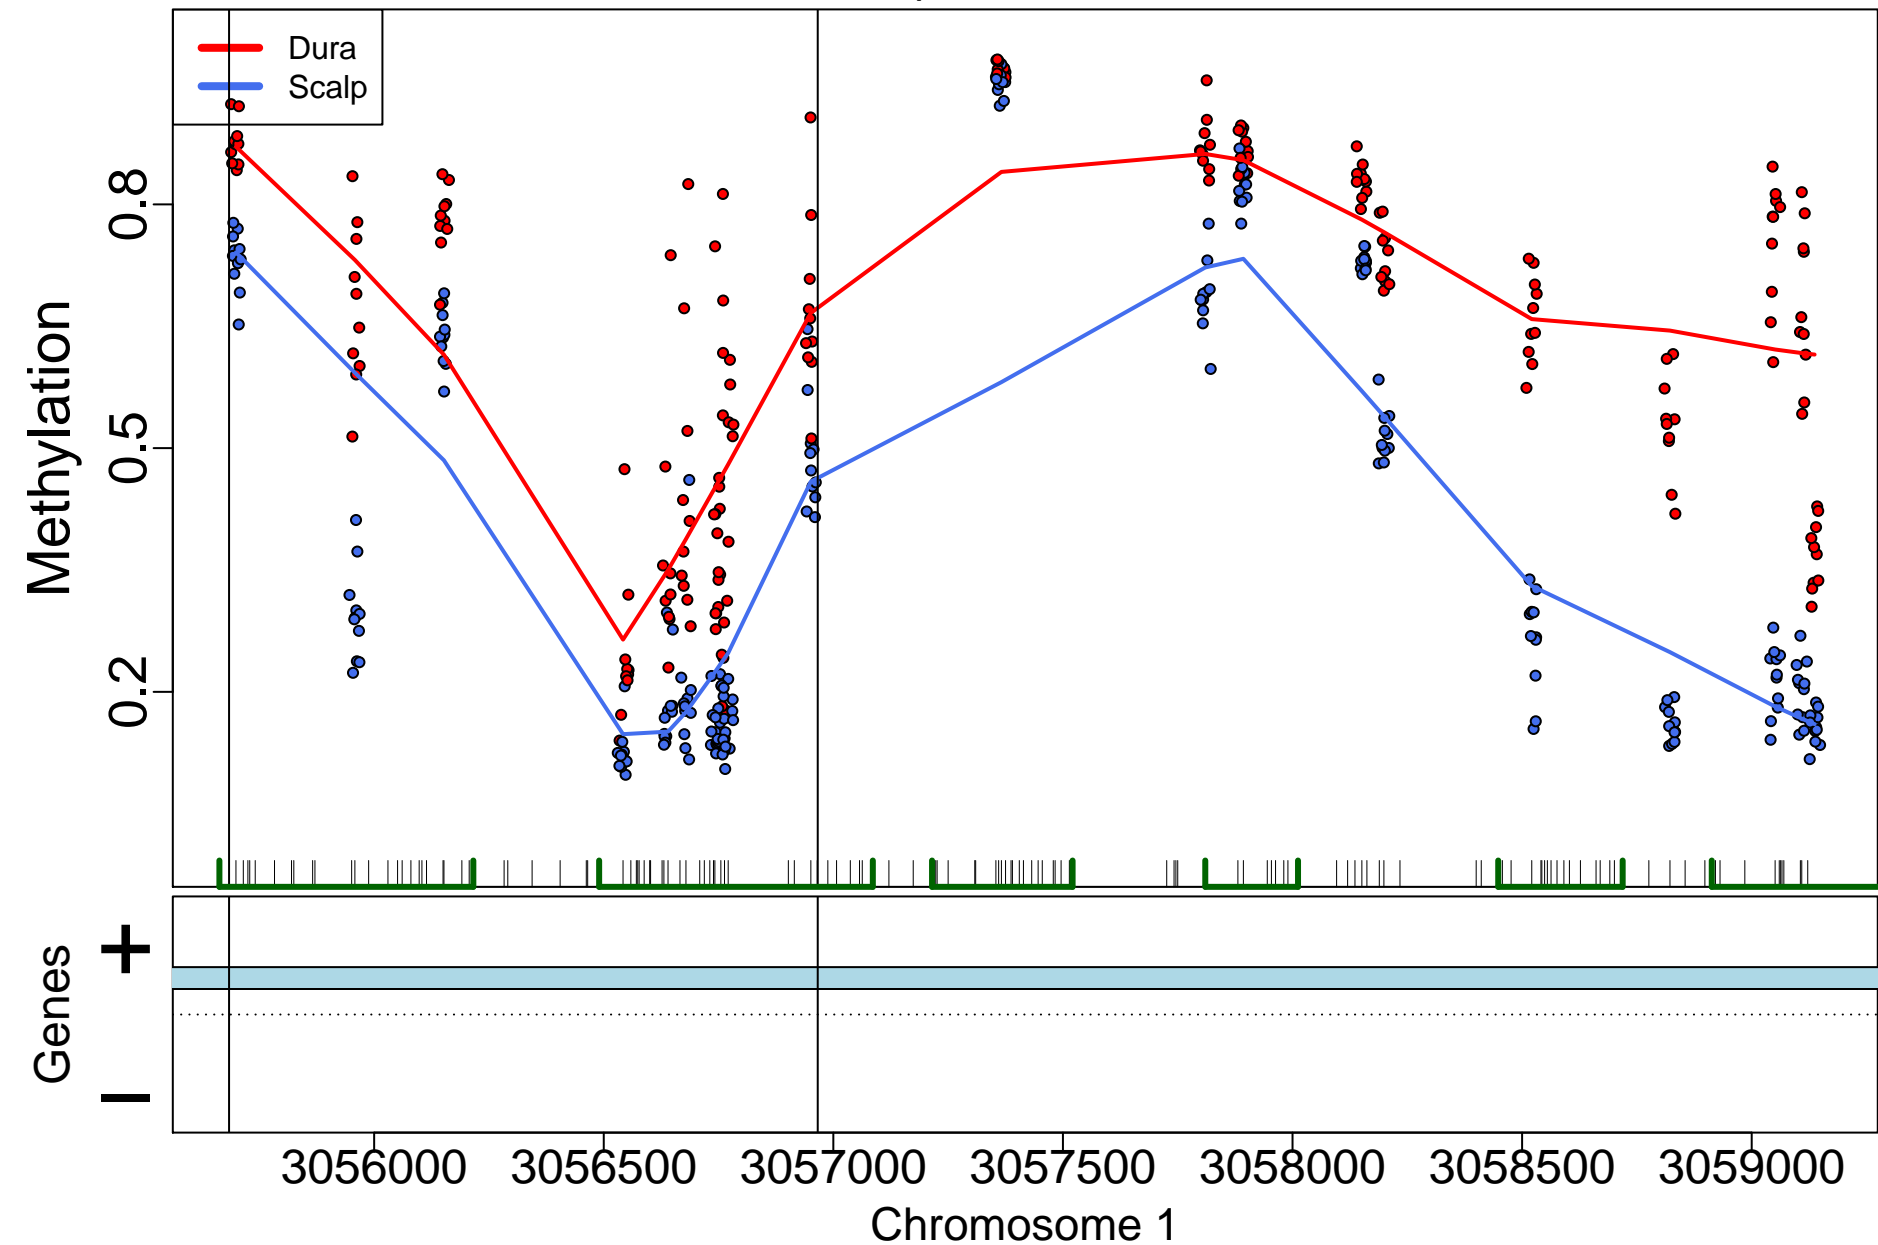

MAS1L; 553bp from tss:inside exon

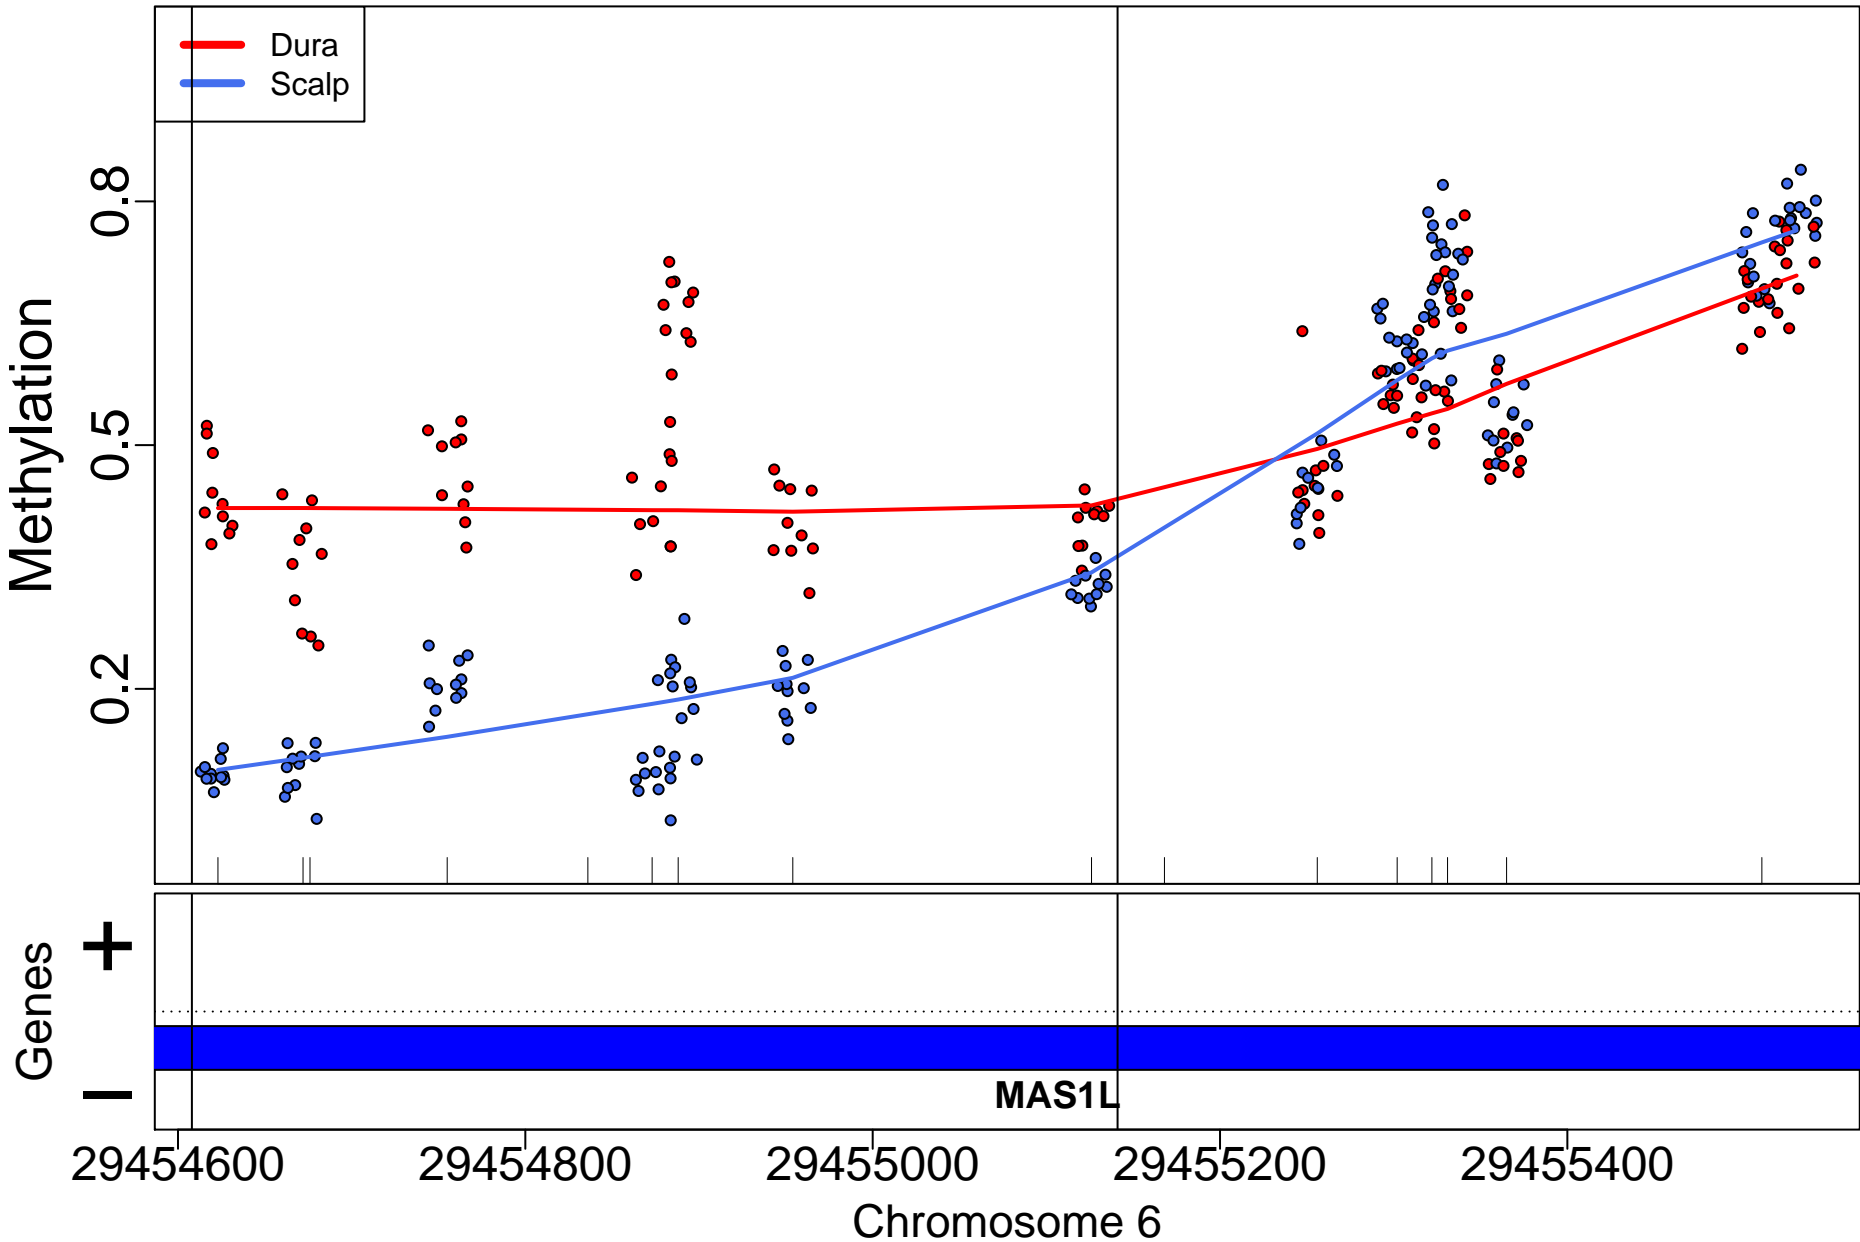

AJAP1; 55830bp from tss:overlaps exon upstream

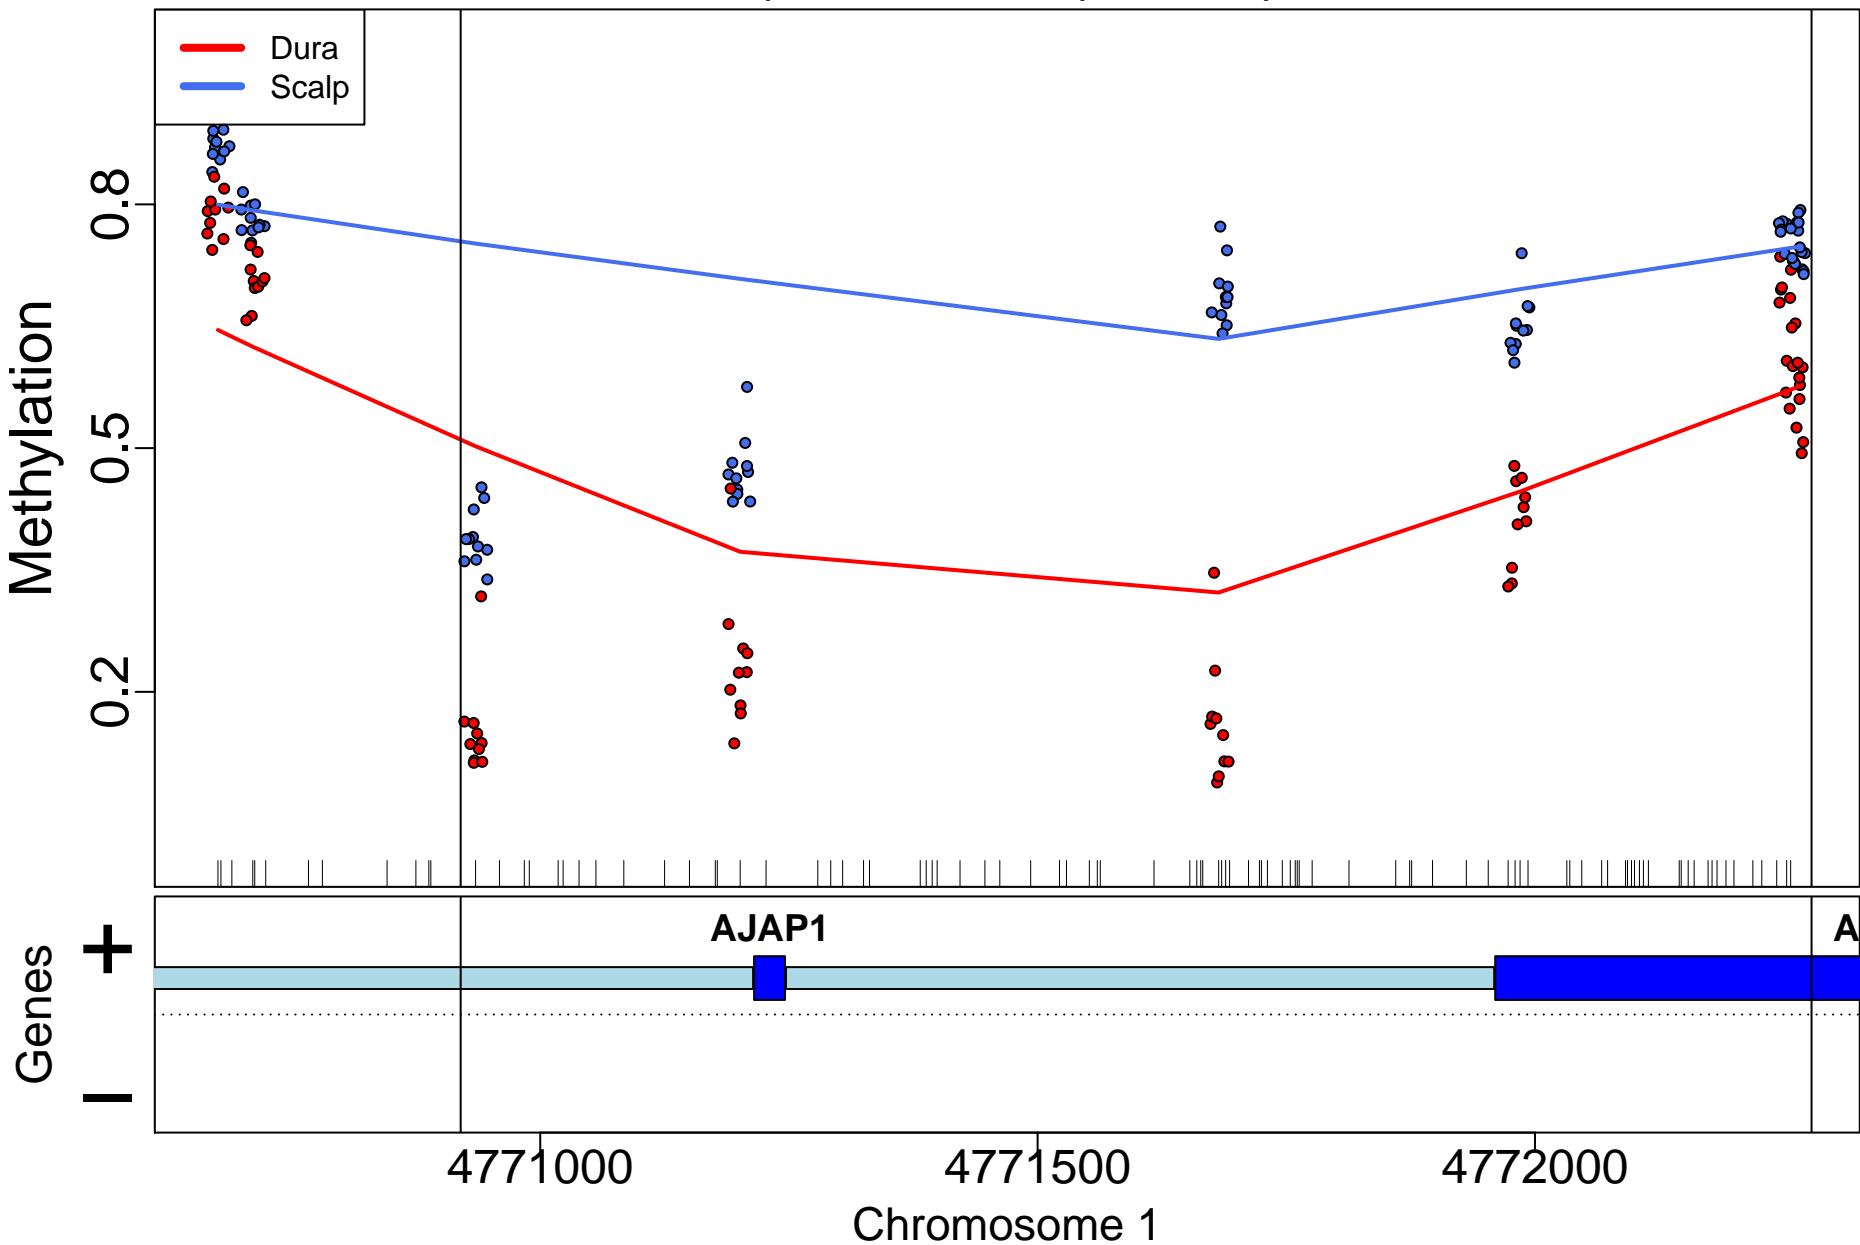

ALOX12; 0bp from tss:overlaps 5'

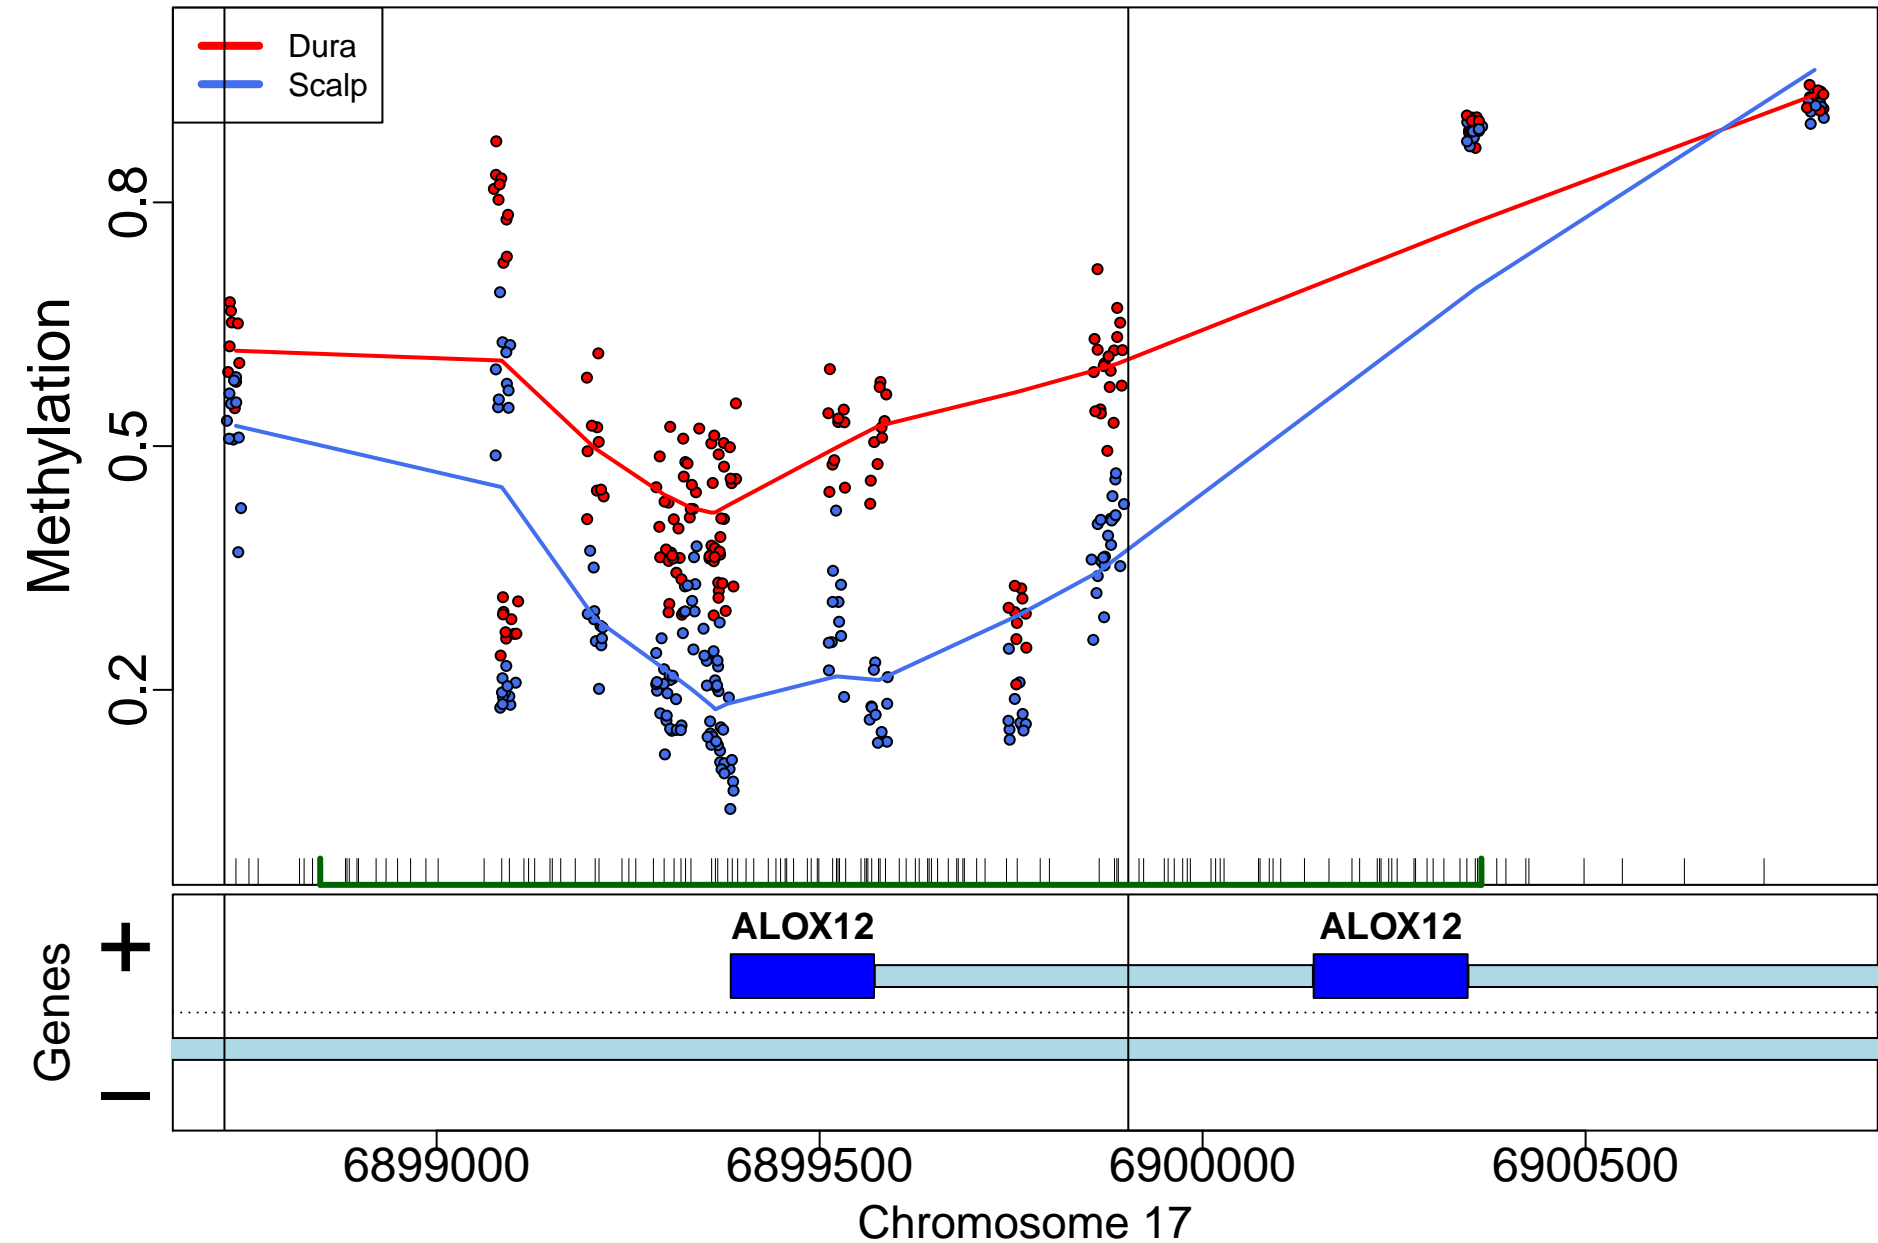

SATB2; 115bp from tss:overlaps exon downstream

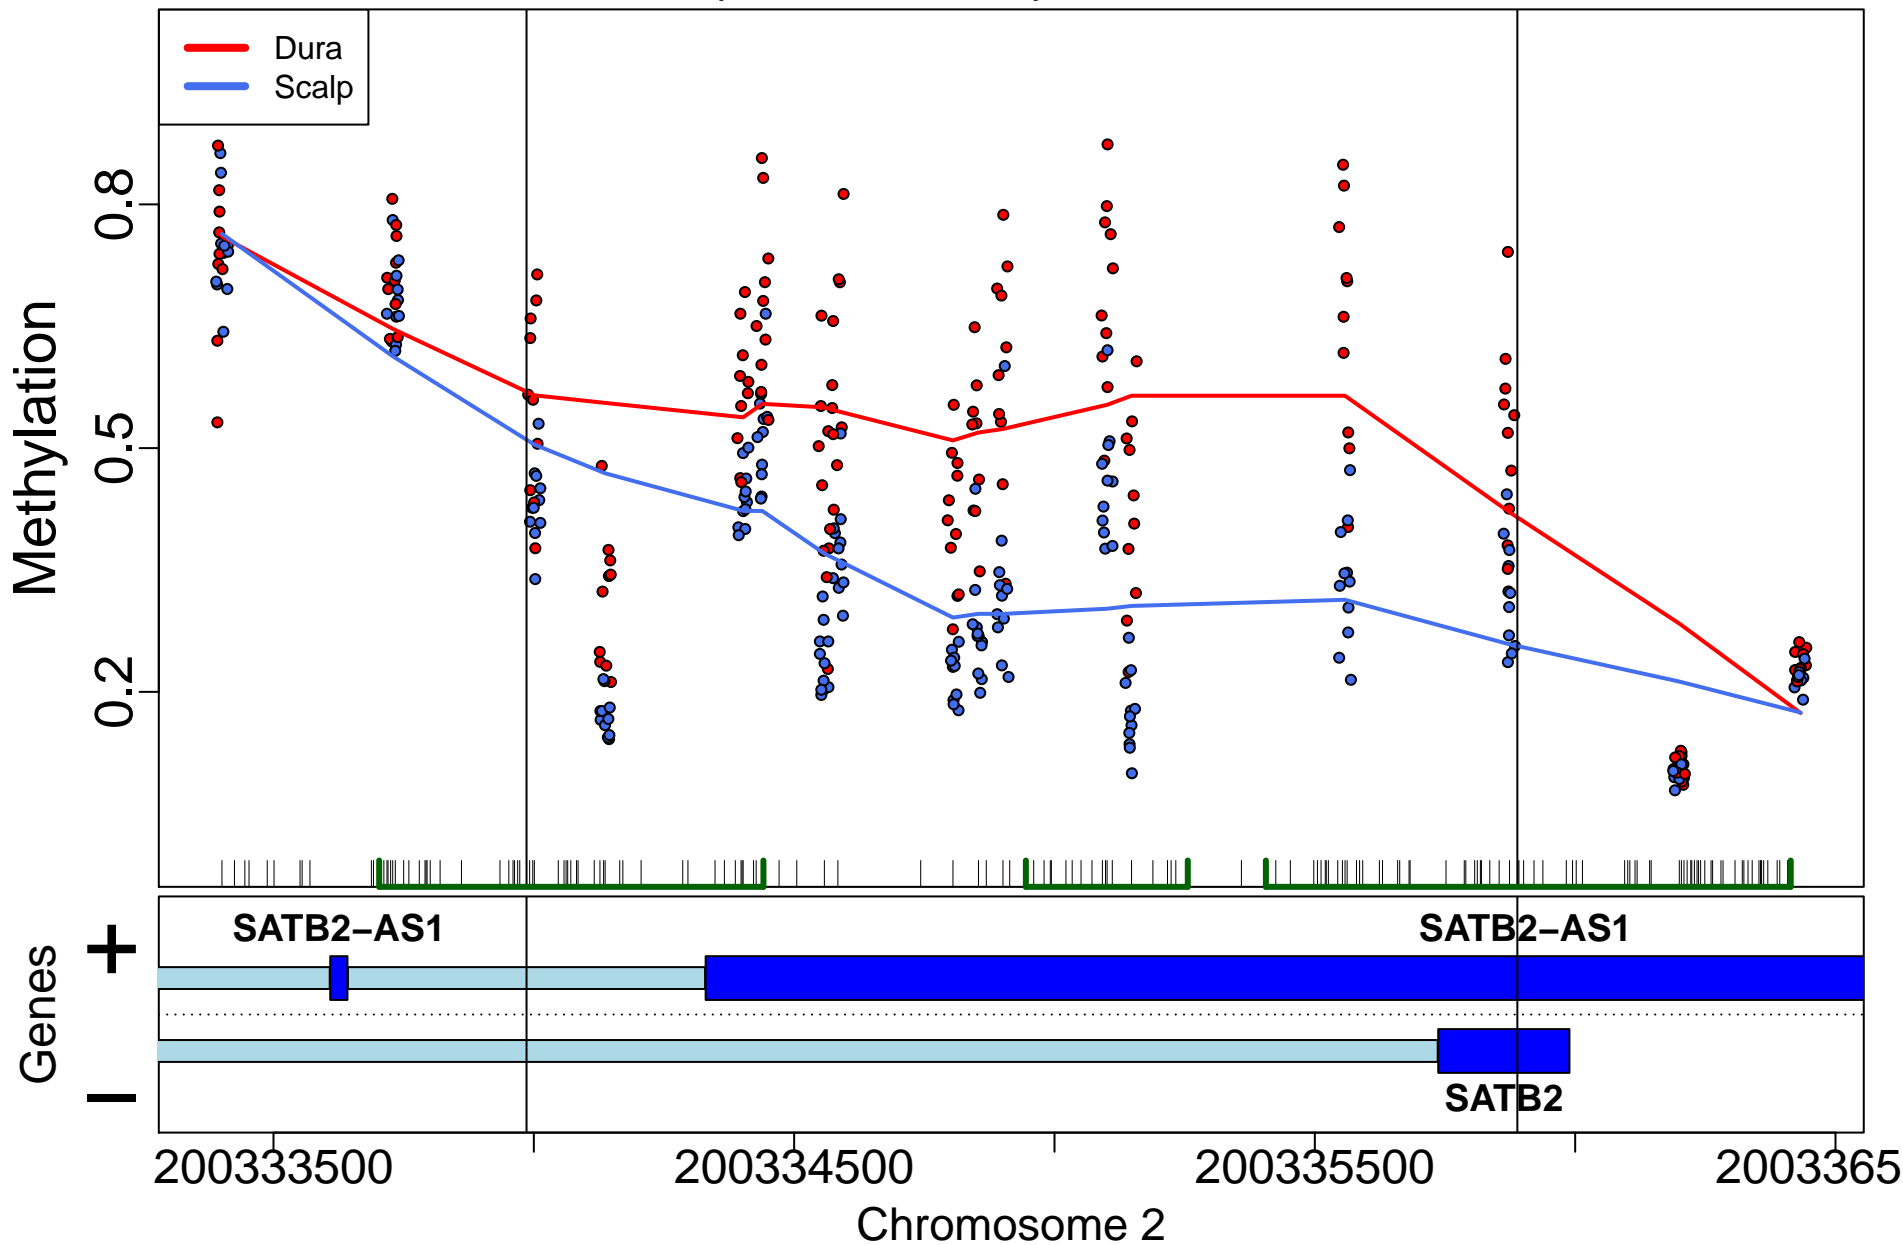



SMOC1; 28875bp from tss:upstream

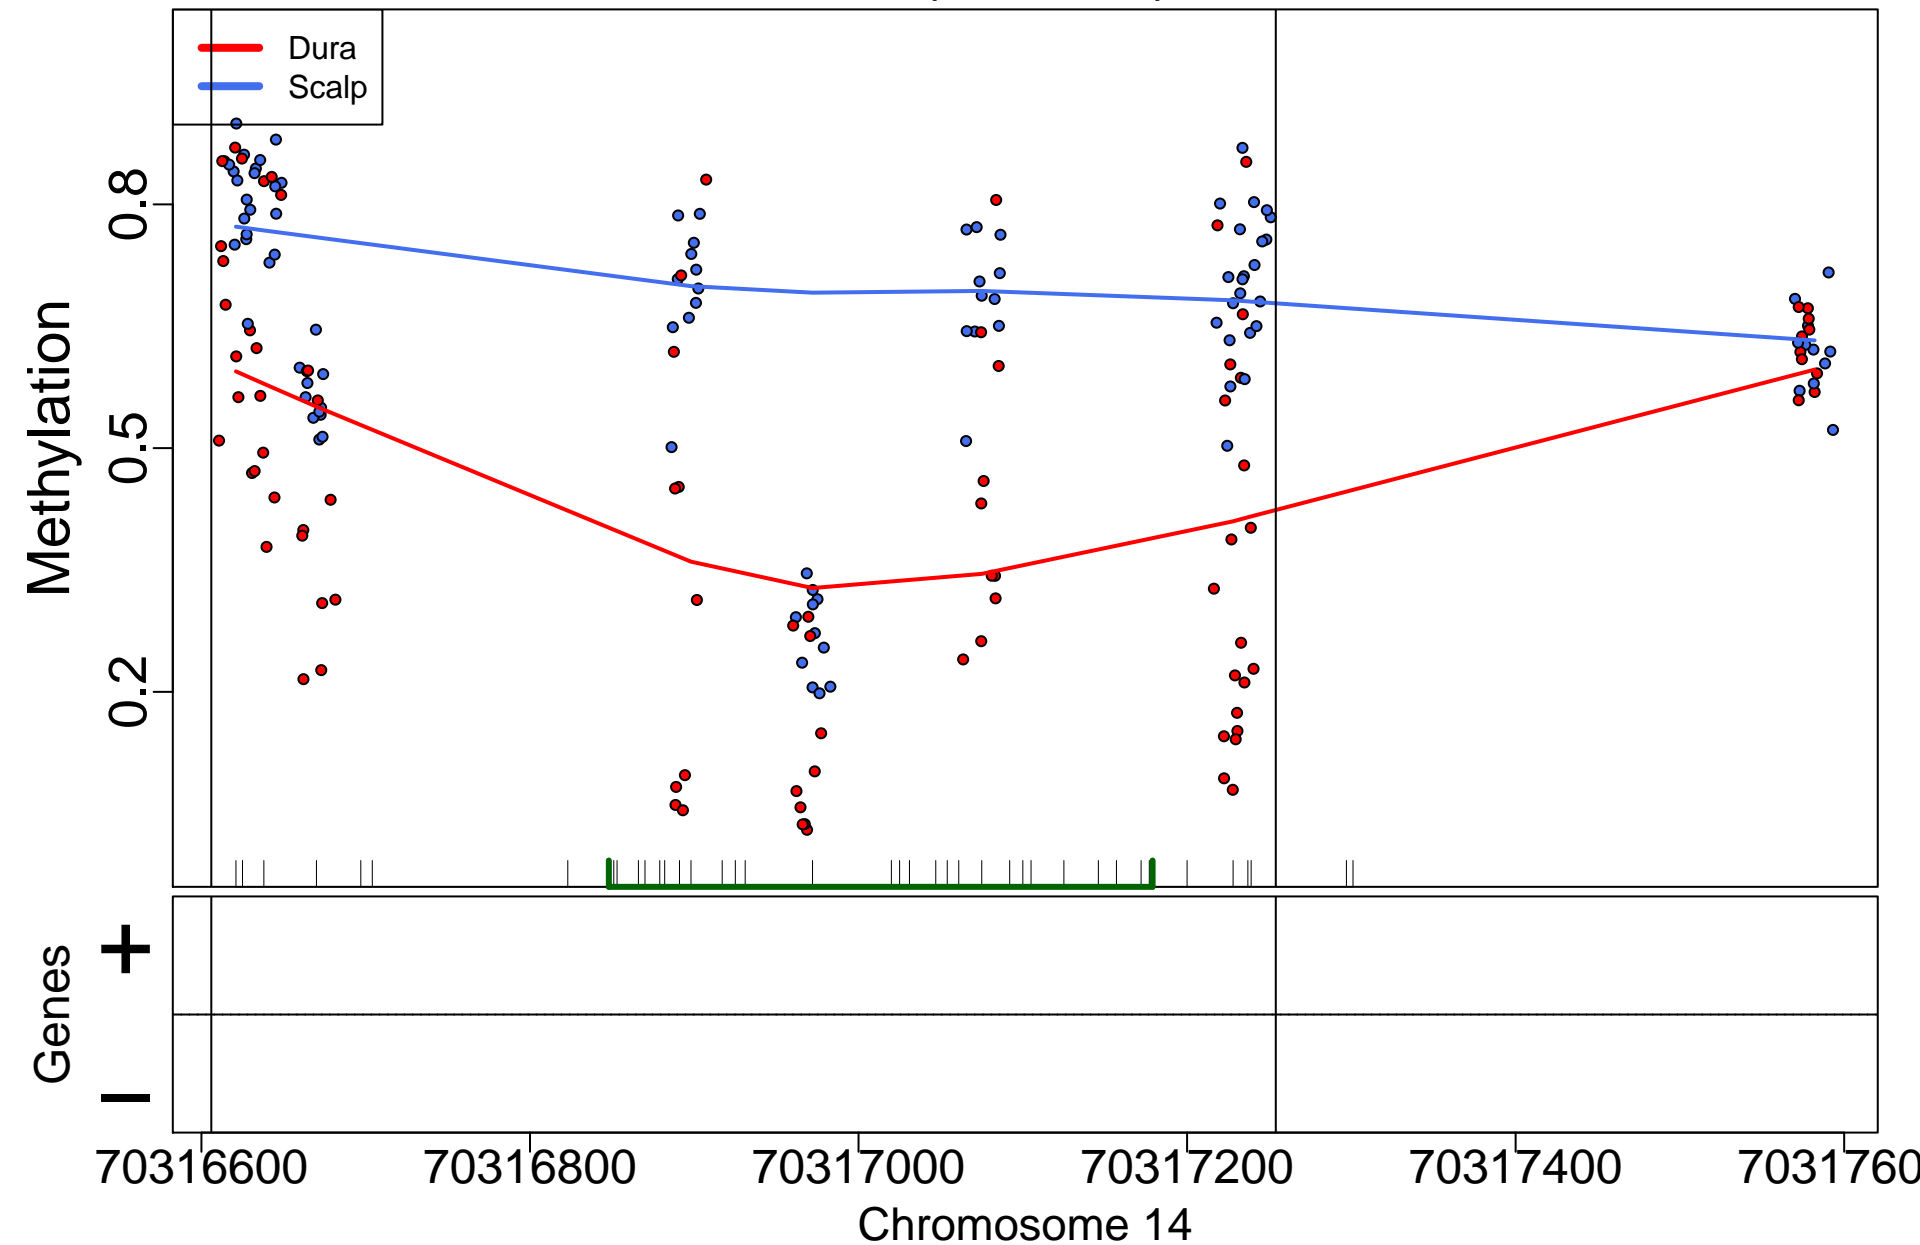

BAIAP2; 22144bp from tss:inside intron

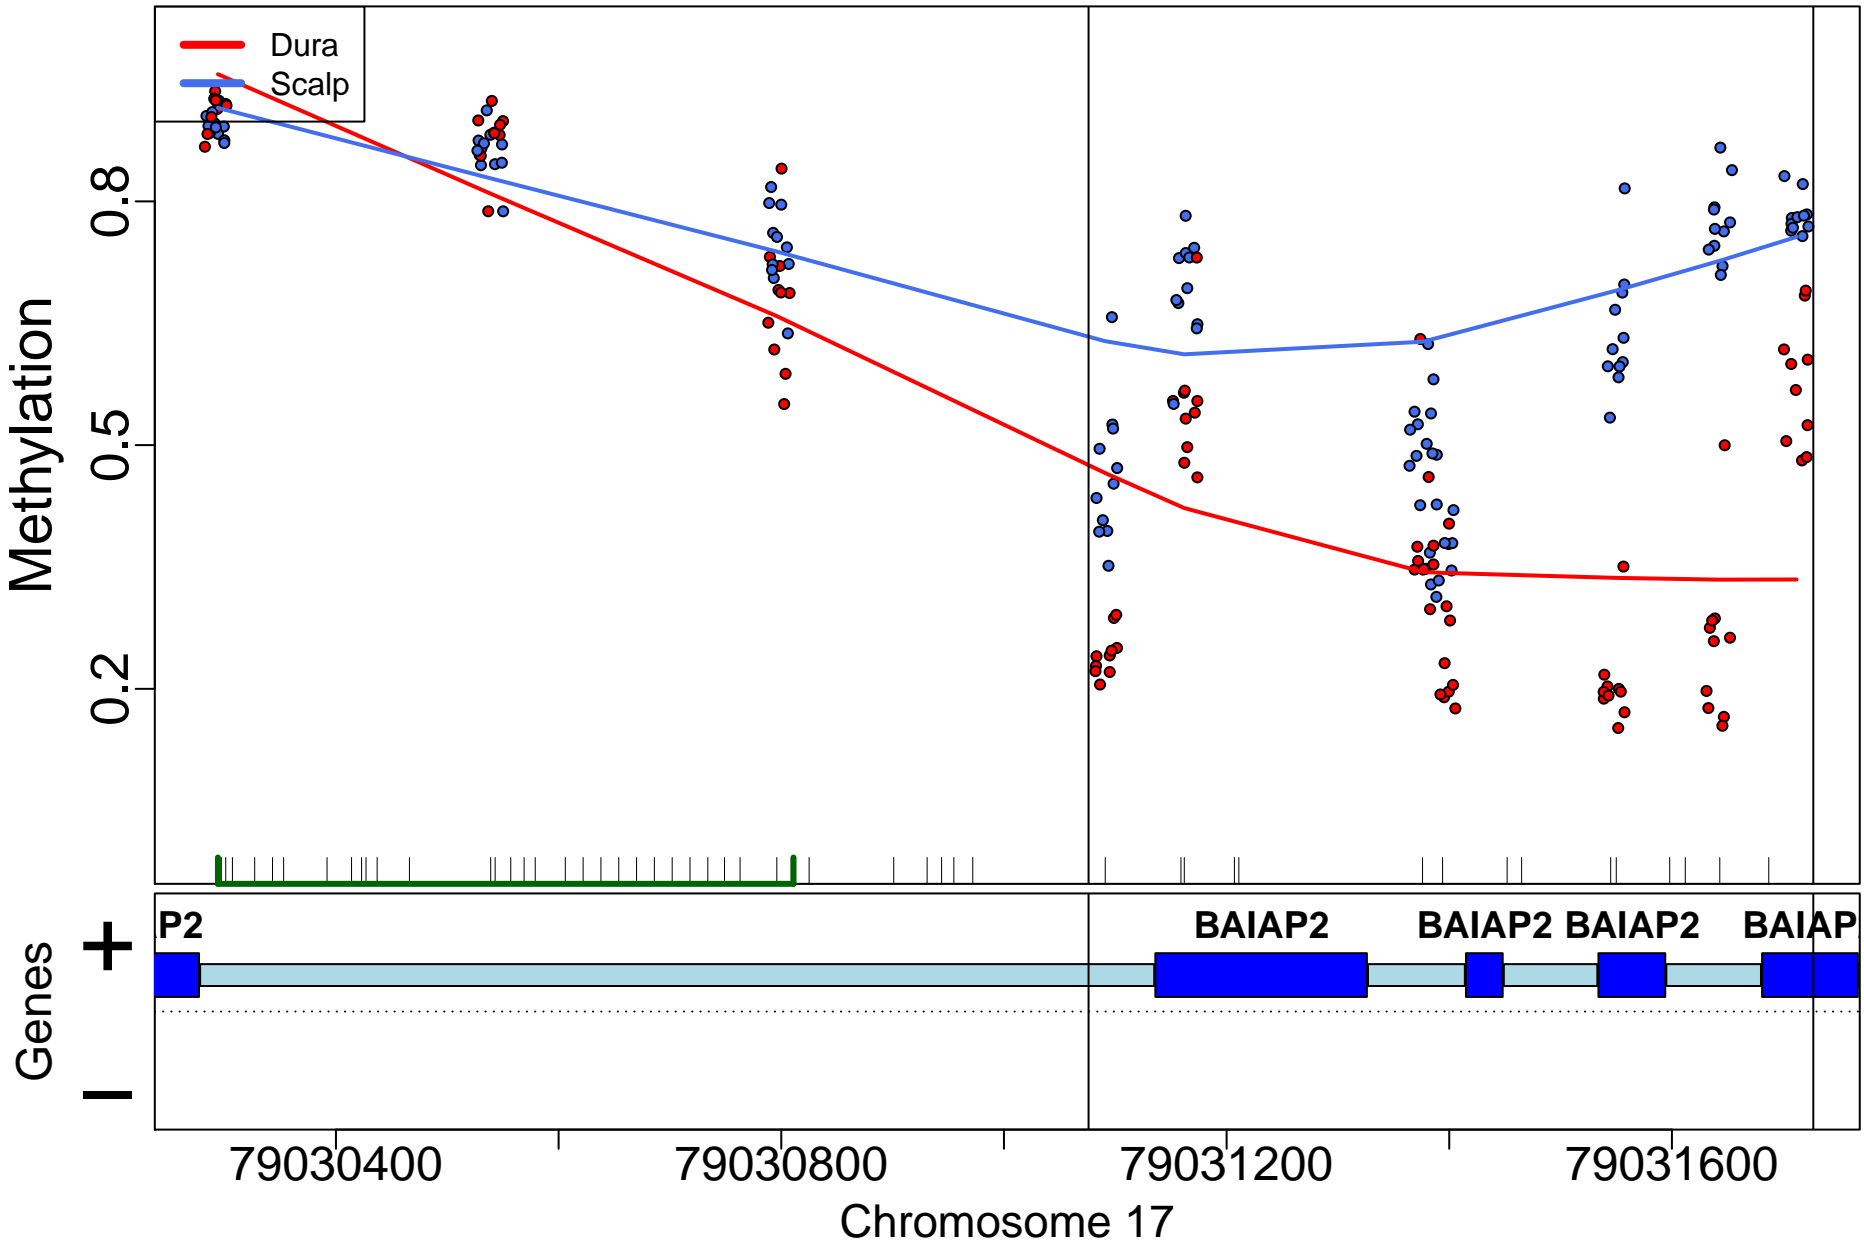

DLX5; 5696bp from tss:downstream

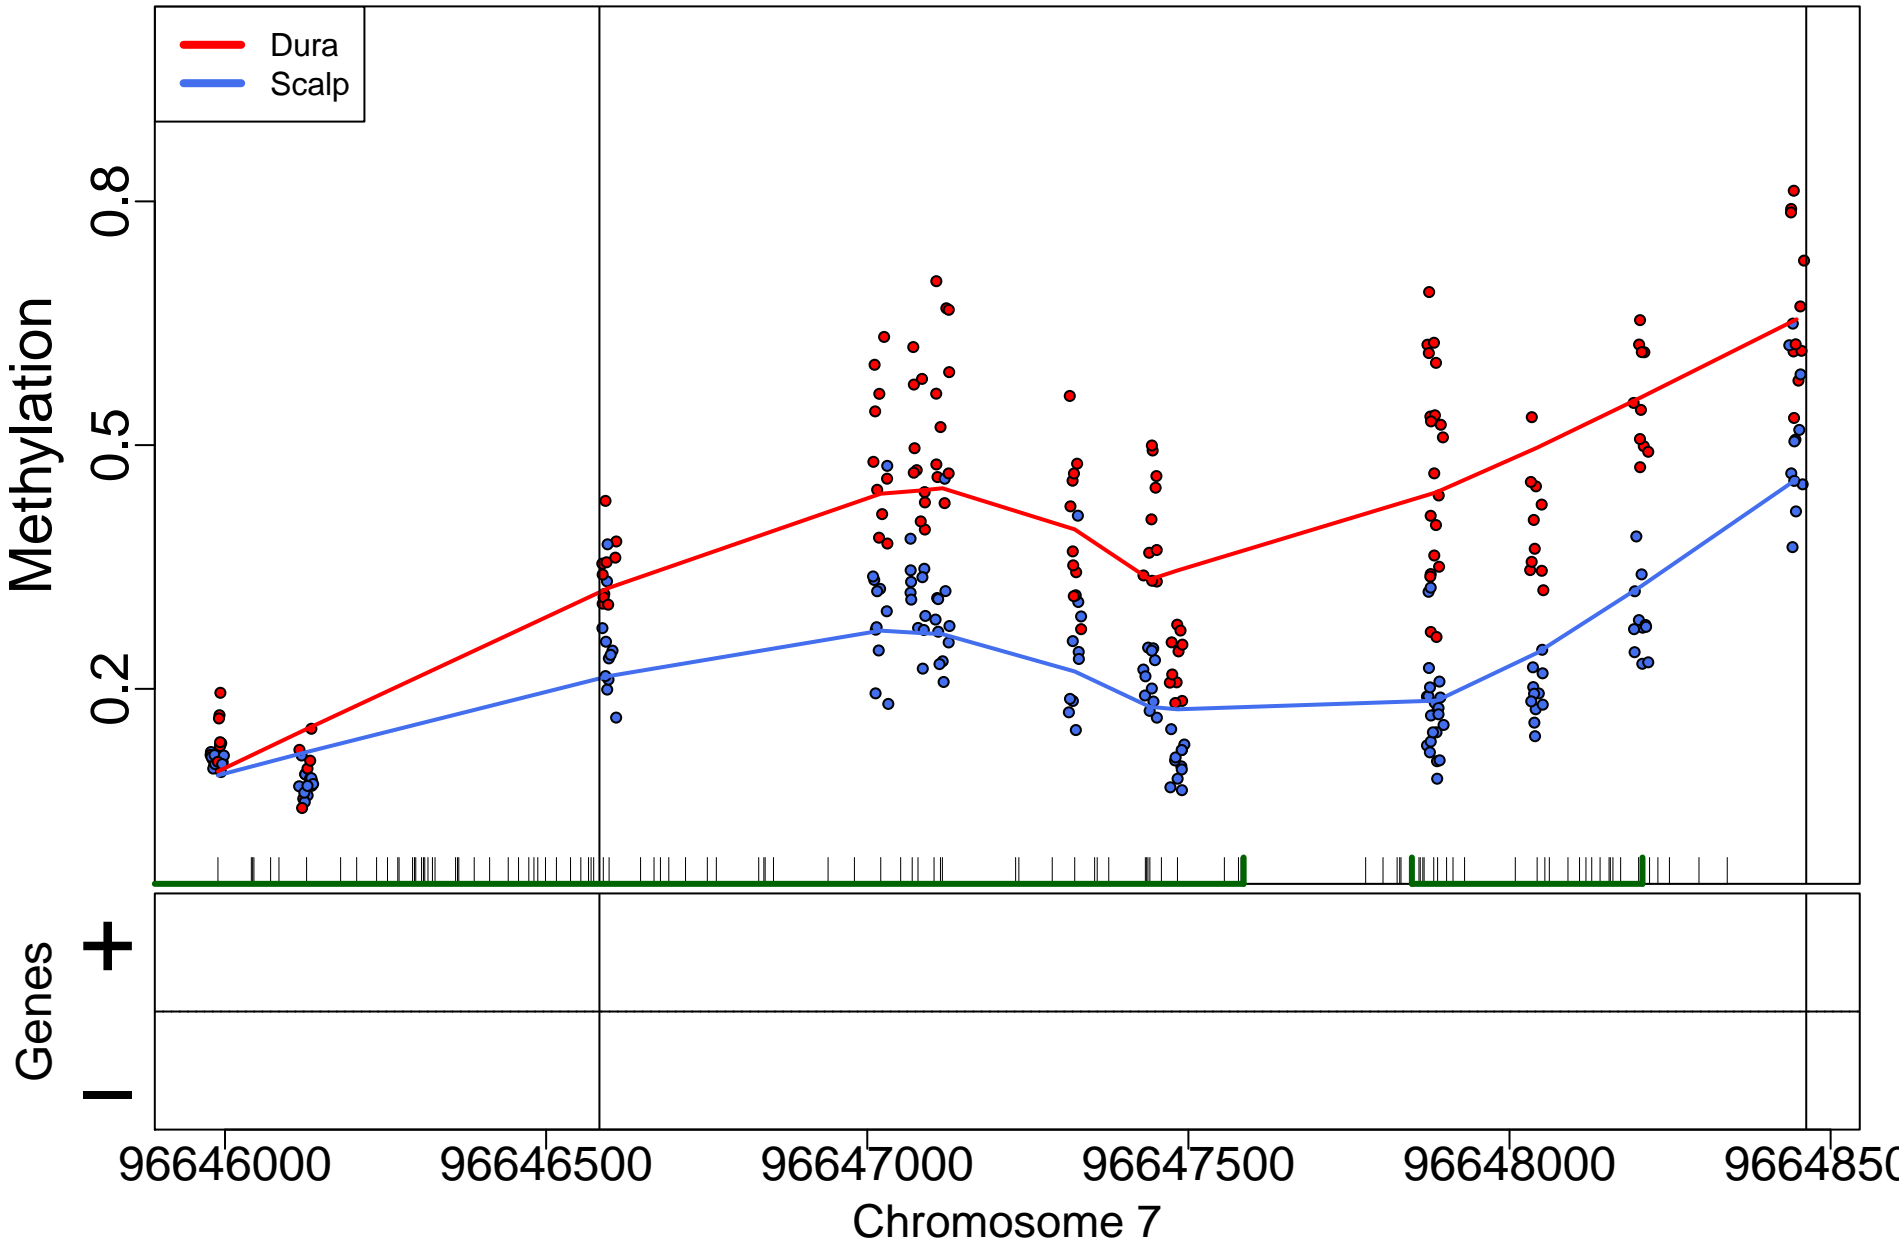

SLC13A4; 90bp from tss:promoter

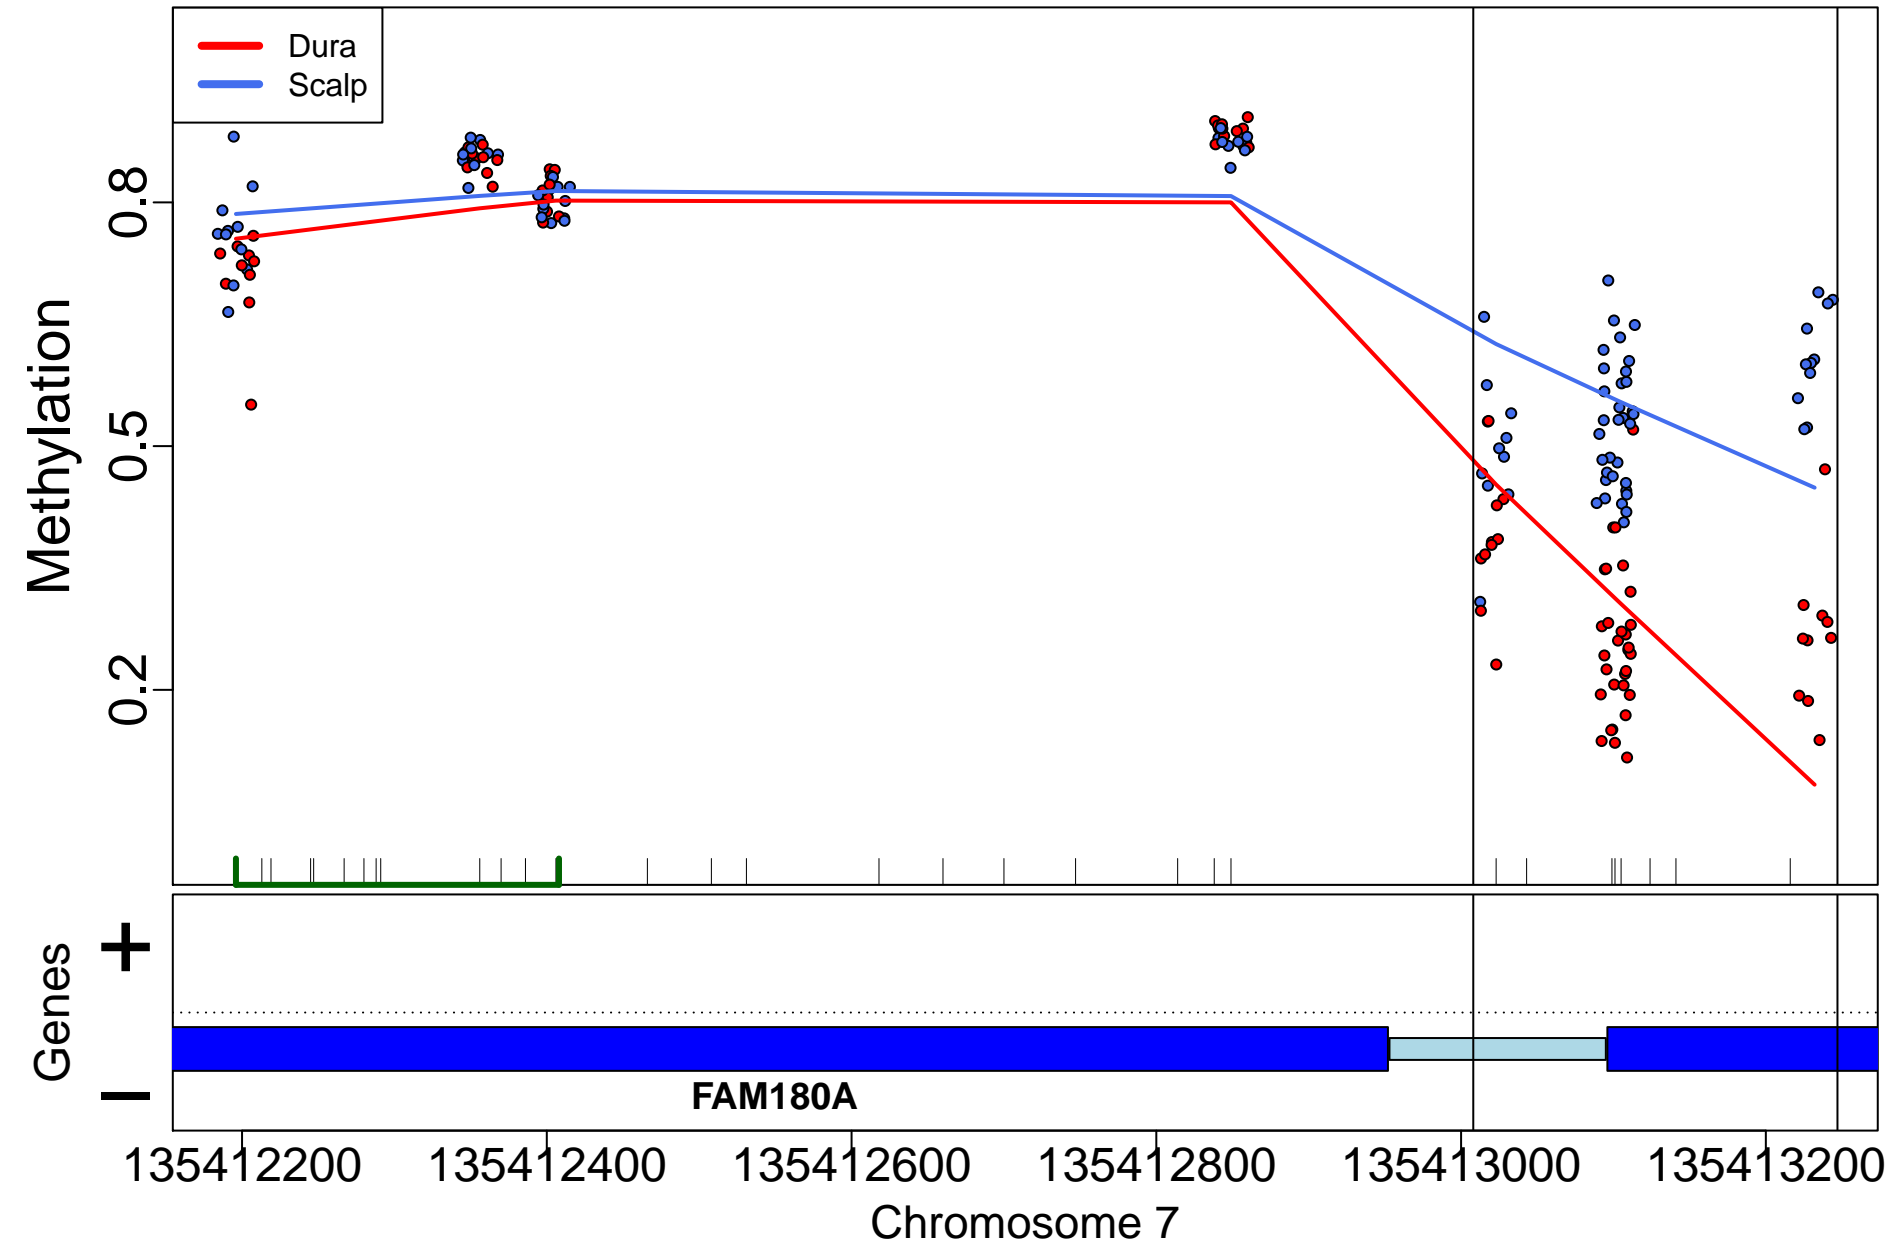

TIPARP; 0bp from tss:overlaps 5'

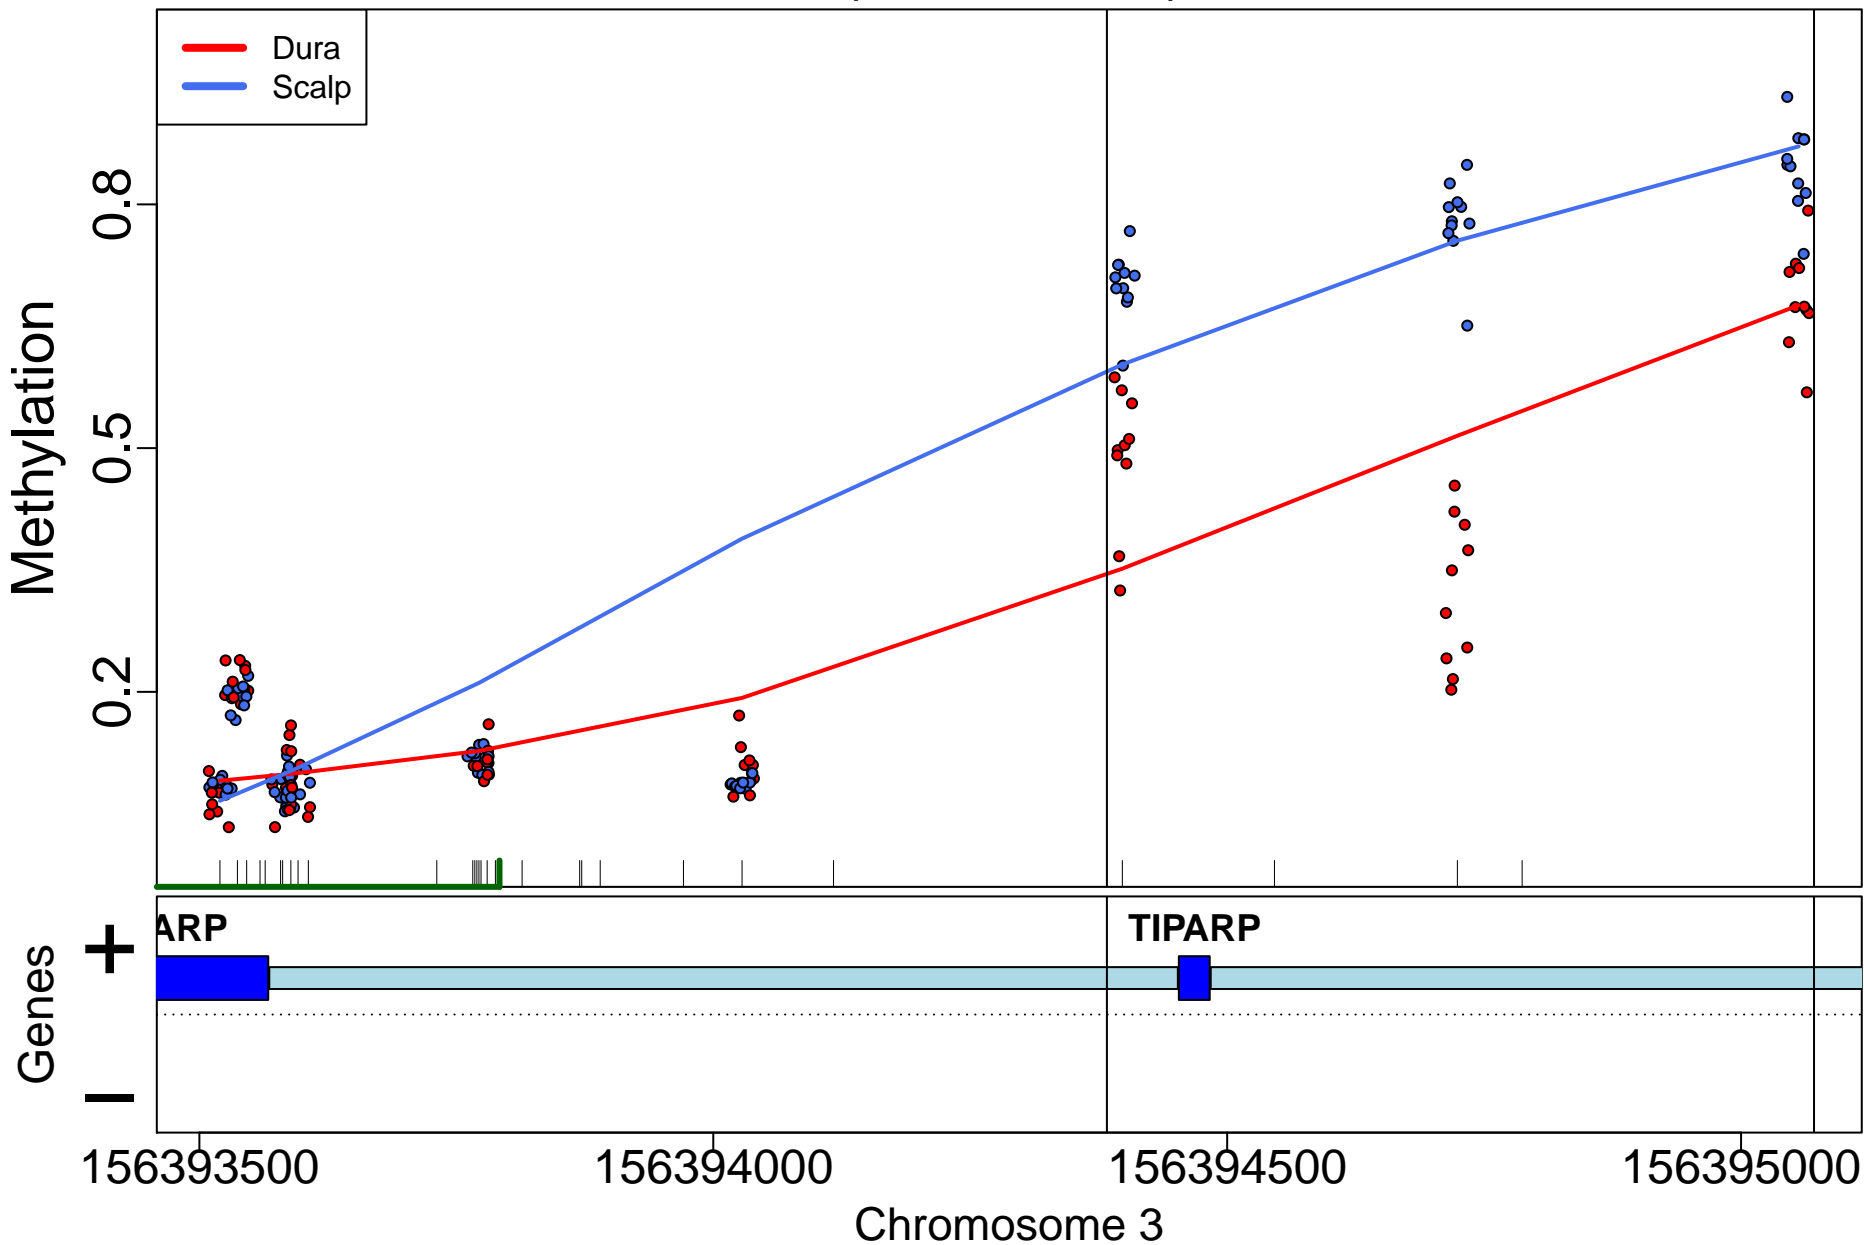

FLJ43879; 0bp from tss:NA

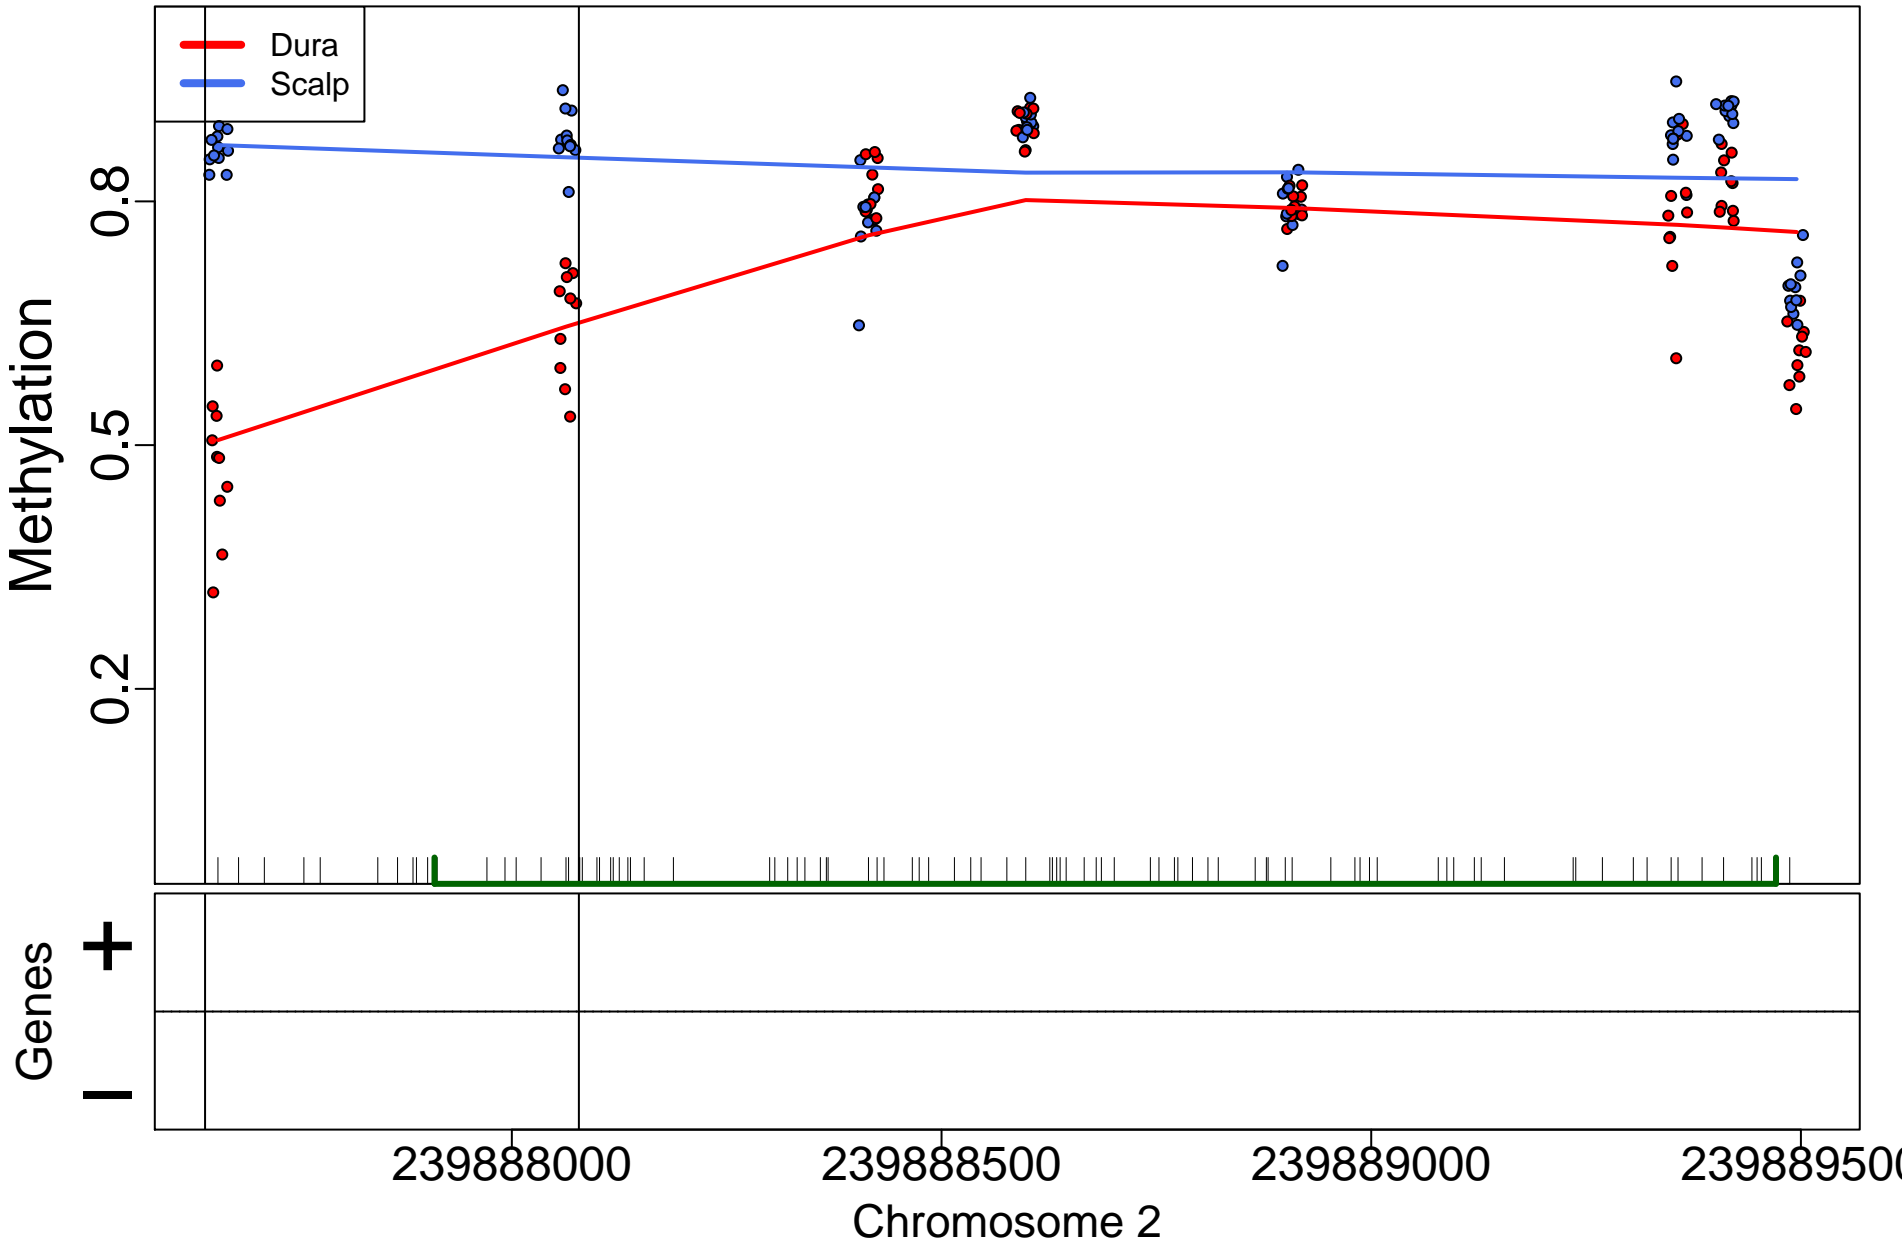

MYCBPAP; 0bp from tss:NA

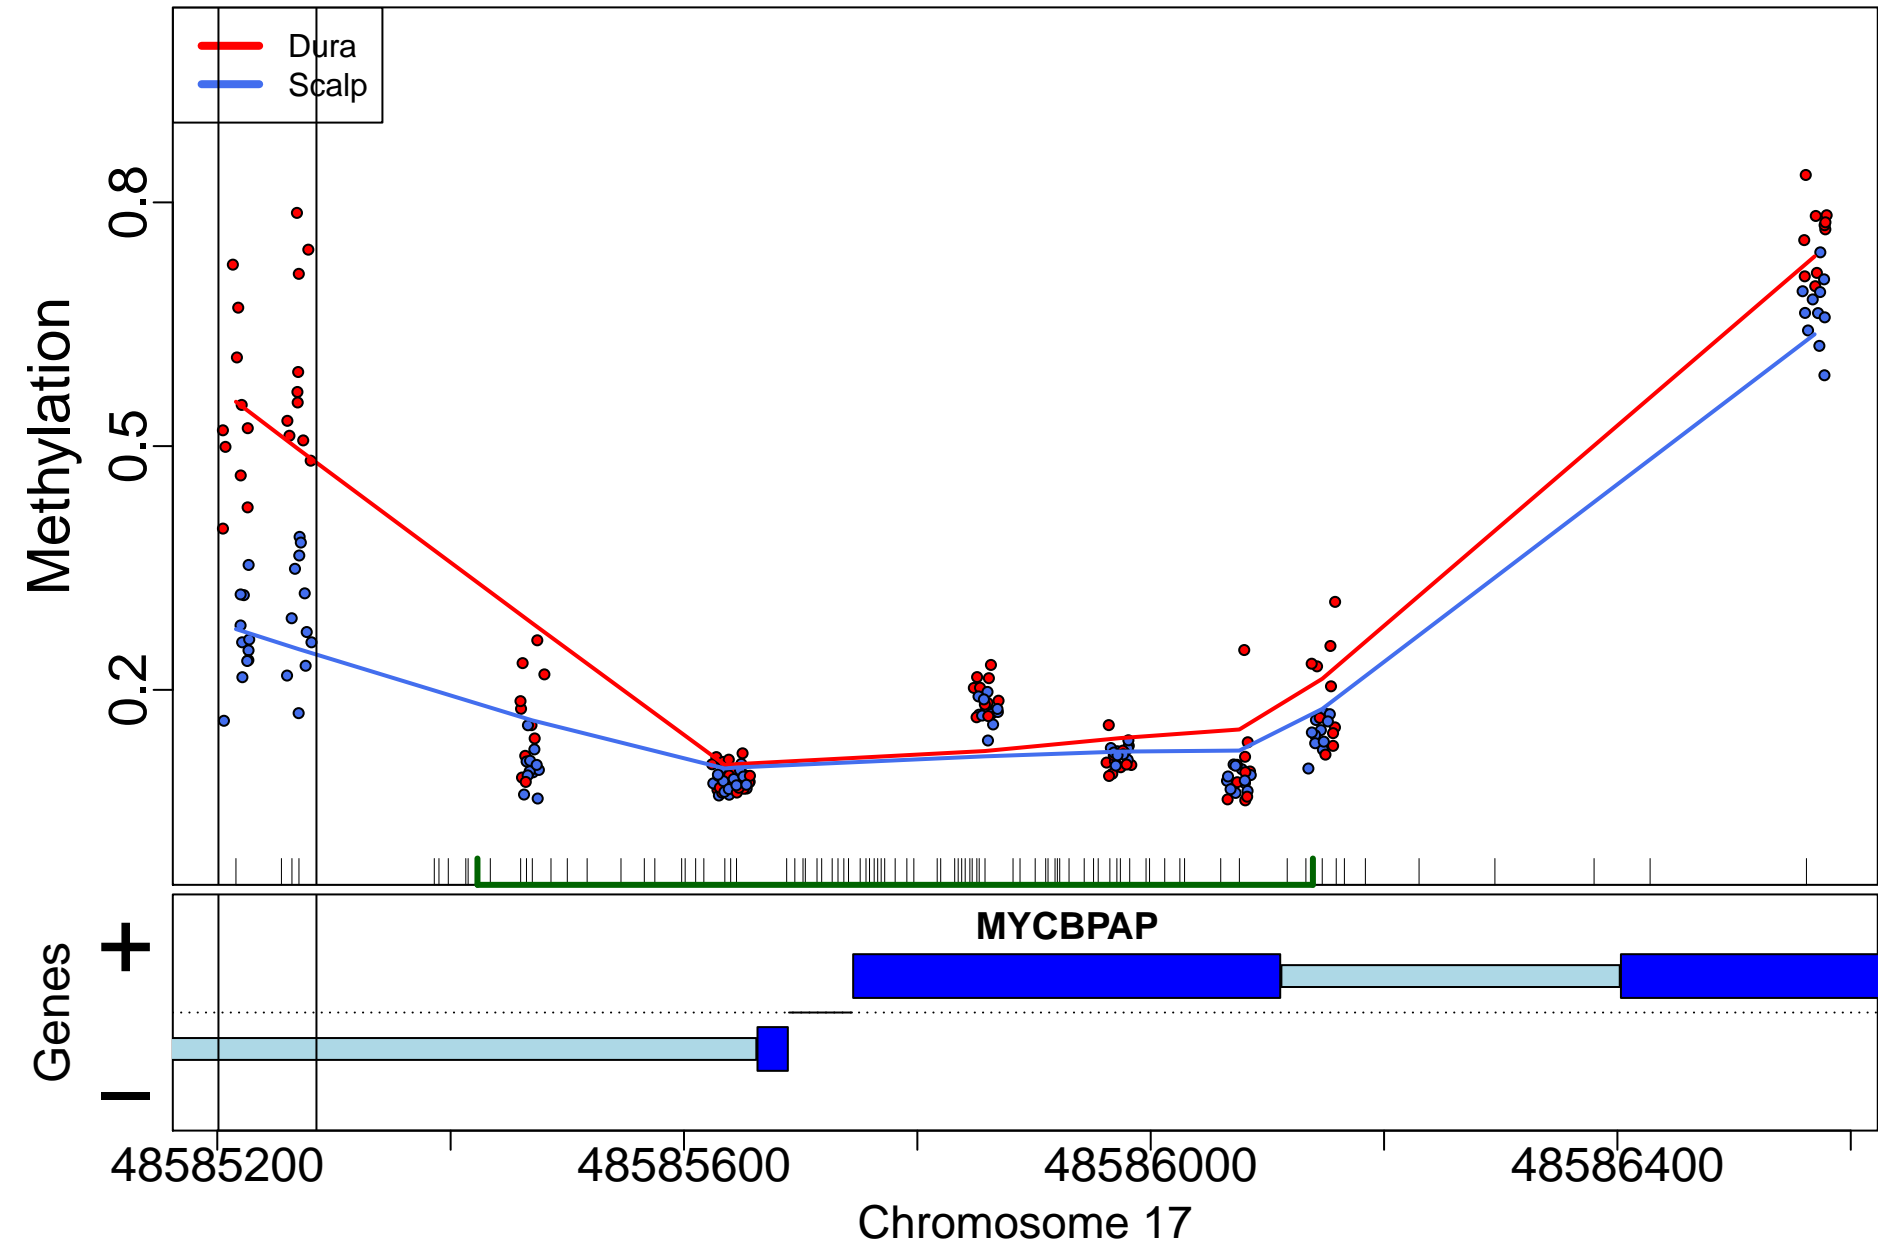

# NFRKB; 664bp from tss:promoter

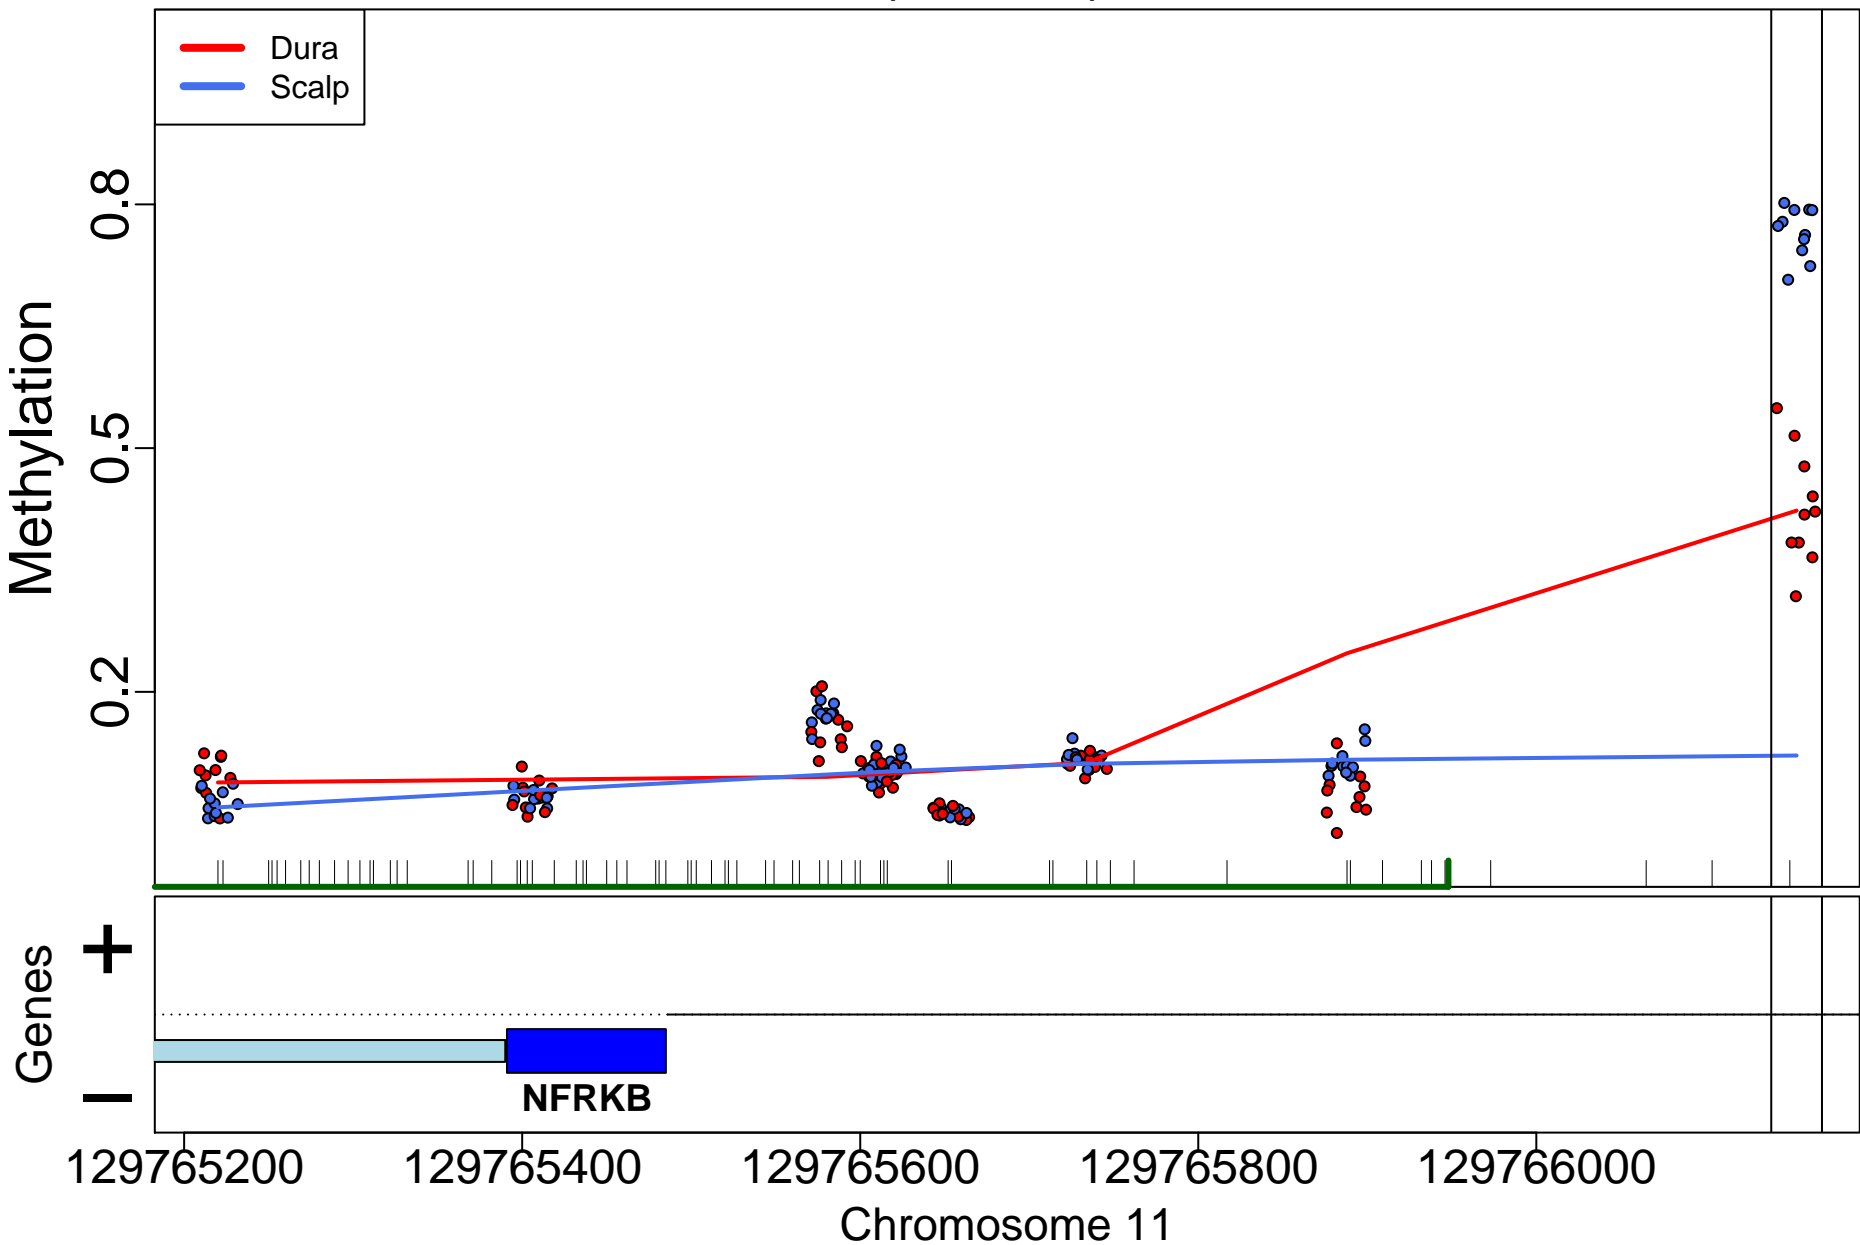



BHLHE22; 5645bp from tss:downstream

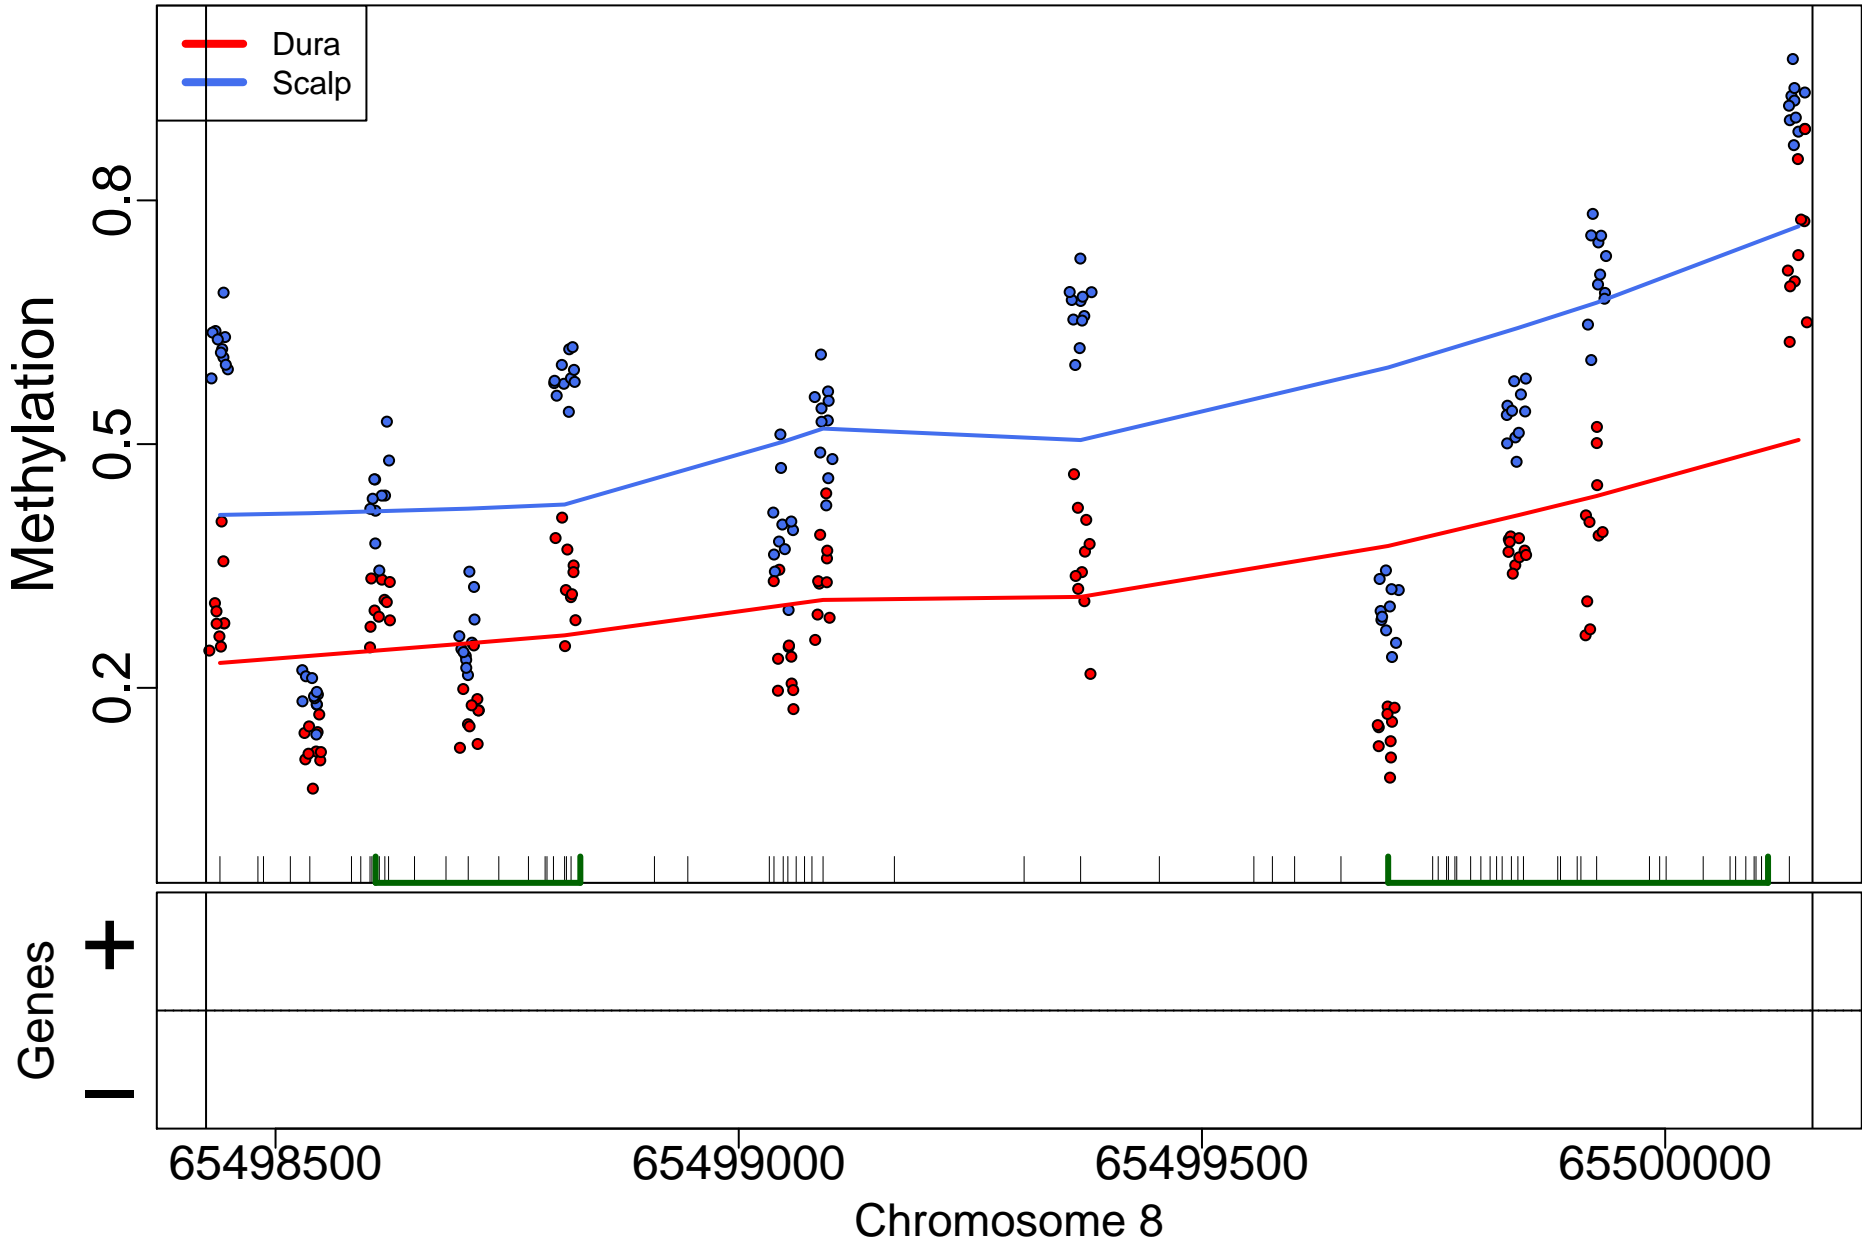

# HAND2; 2537bp from tss:overlaps exon upstream

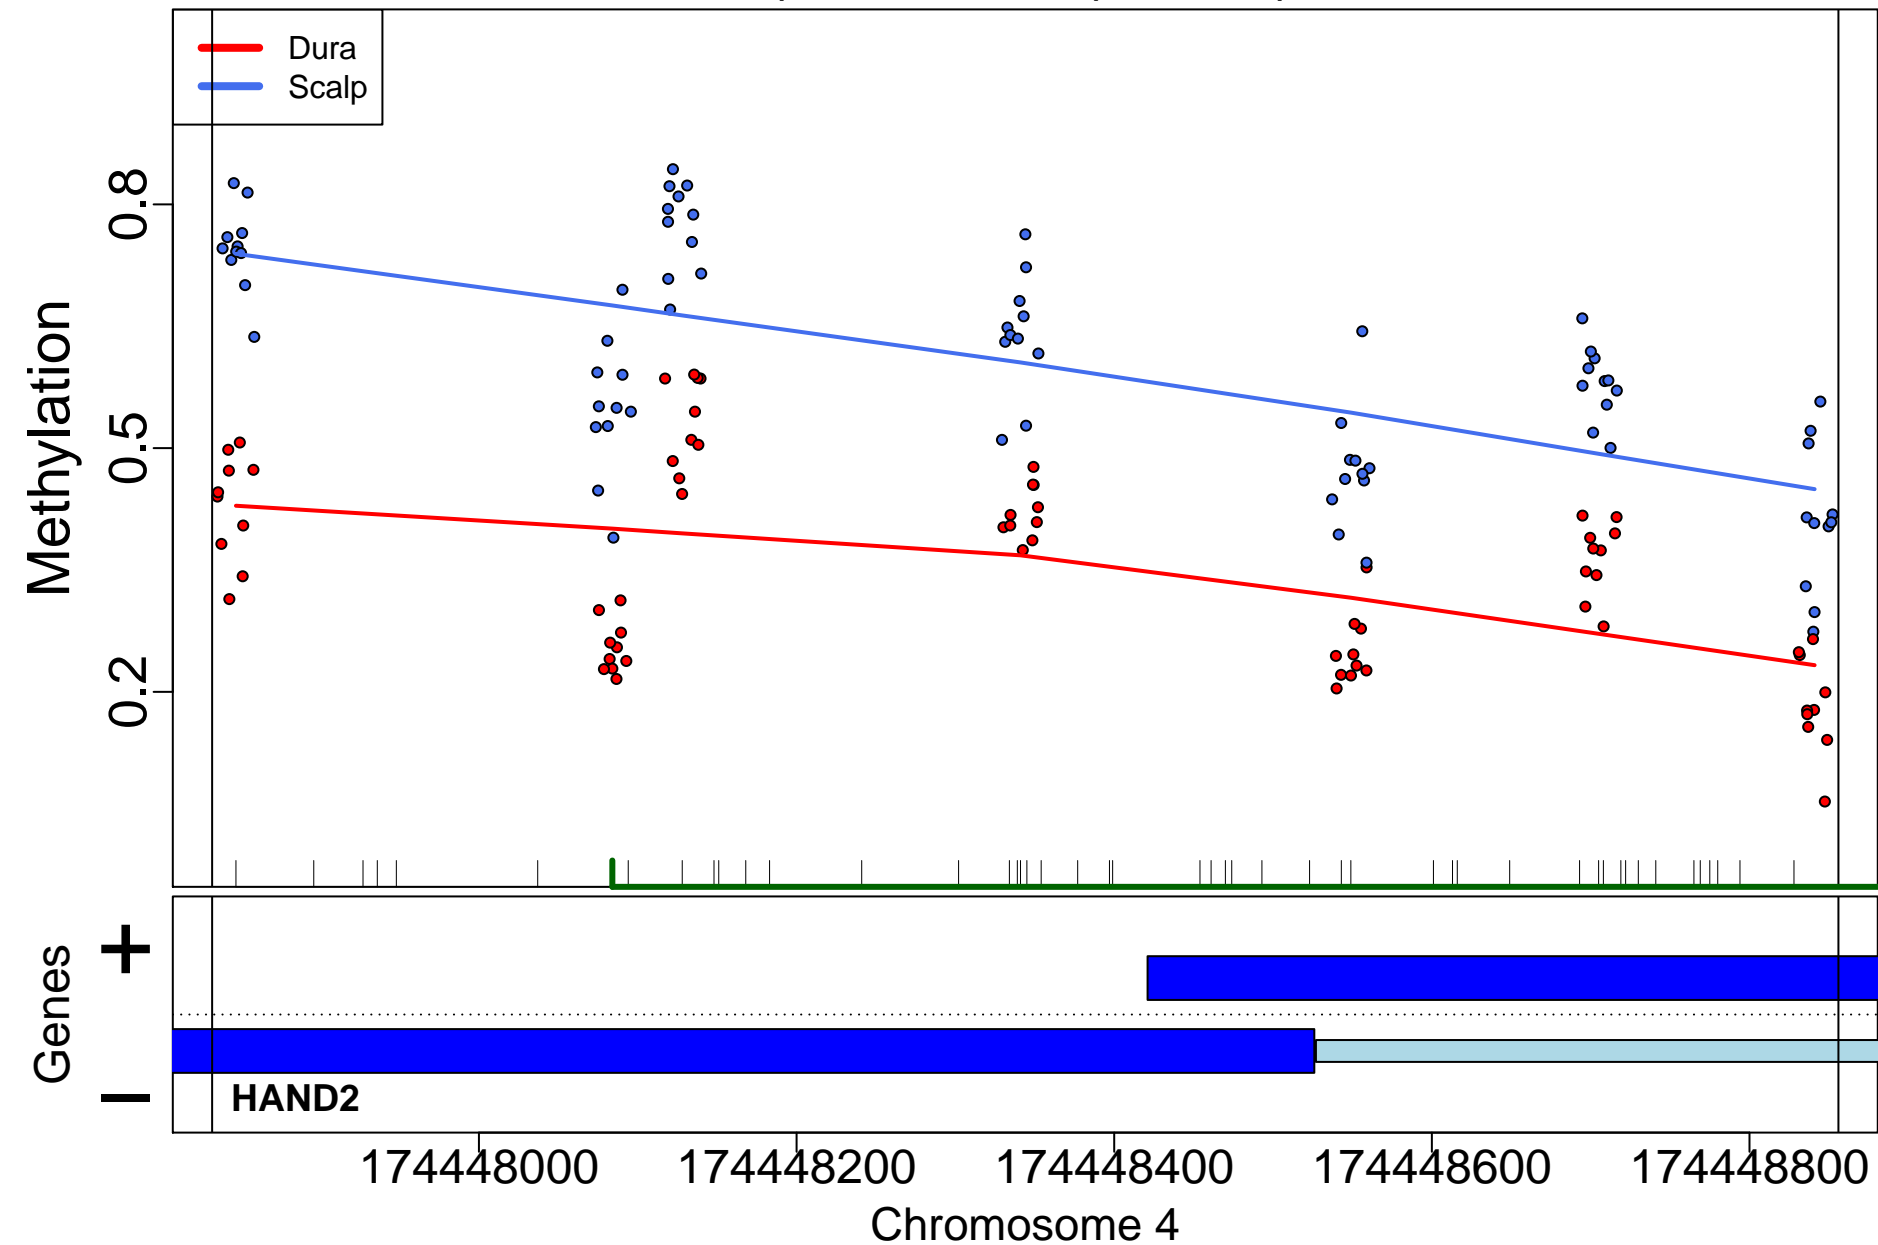

MYF6; 281bp from tss:covers exon(s)

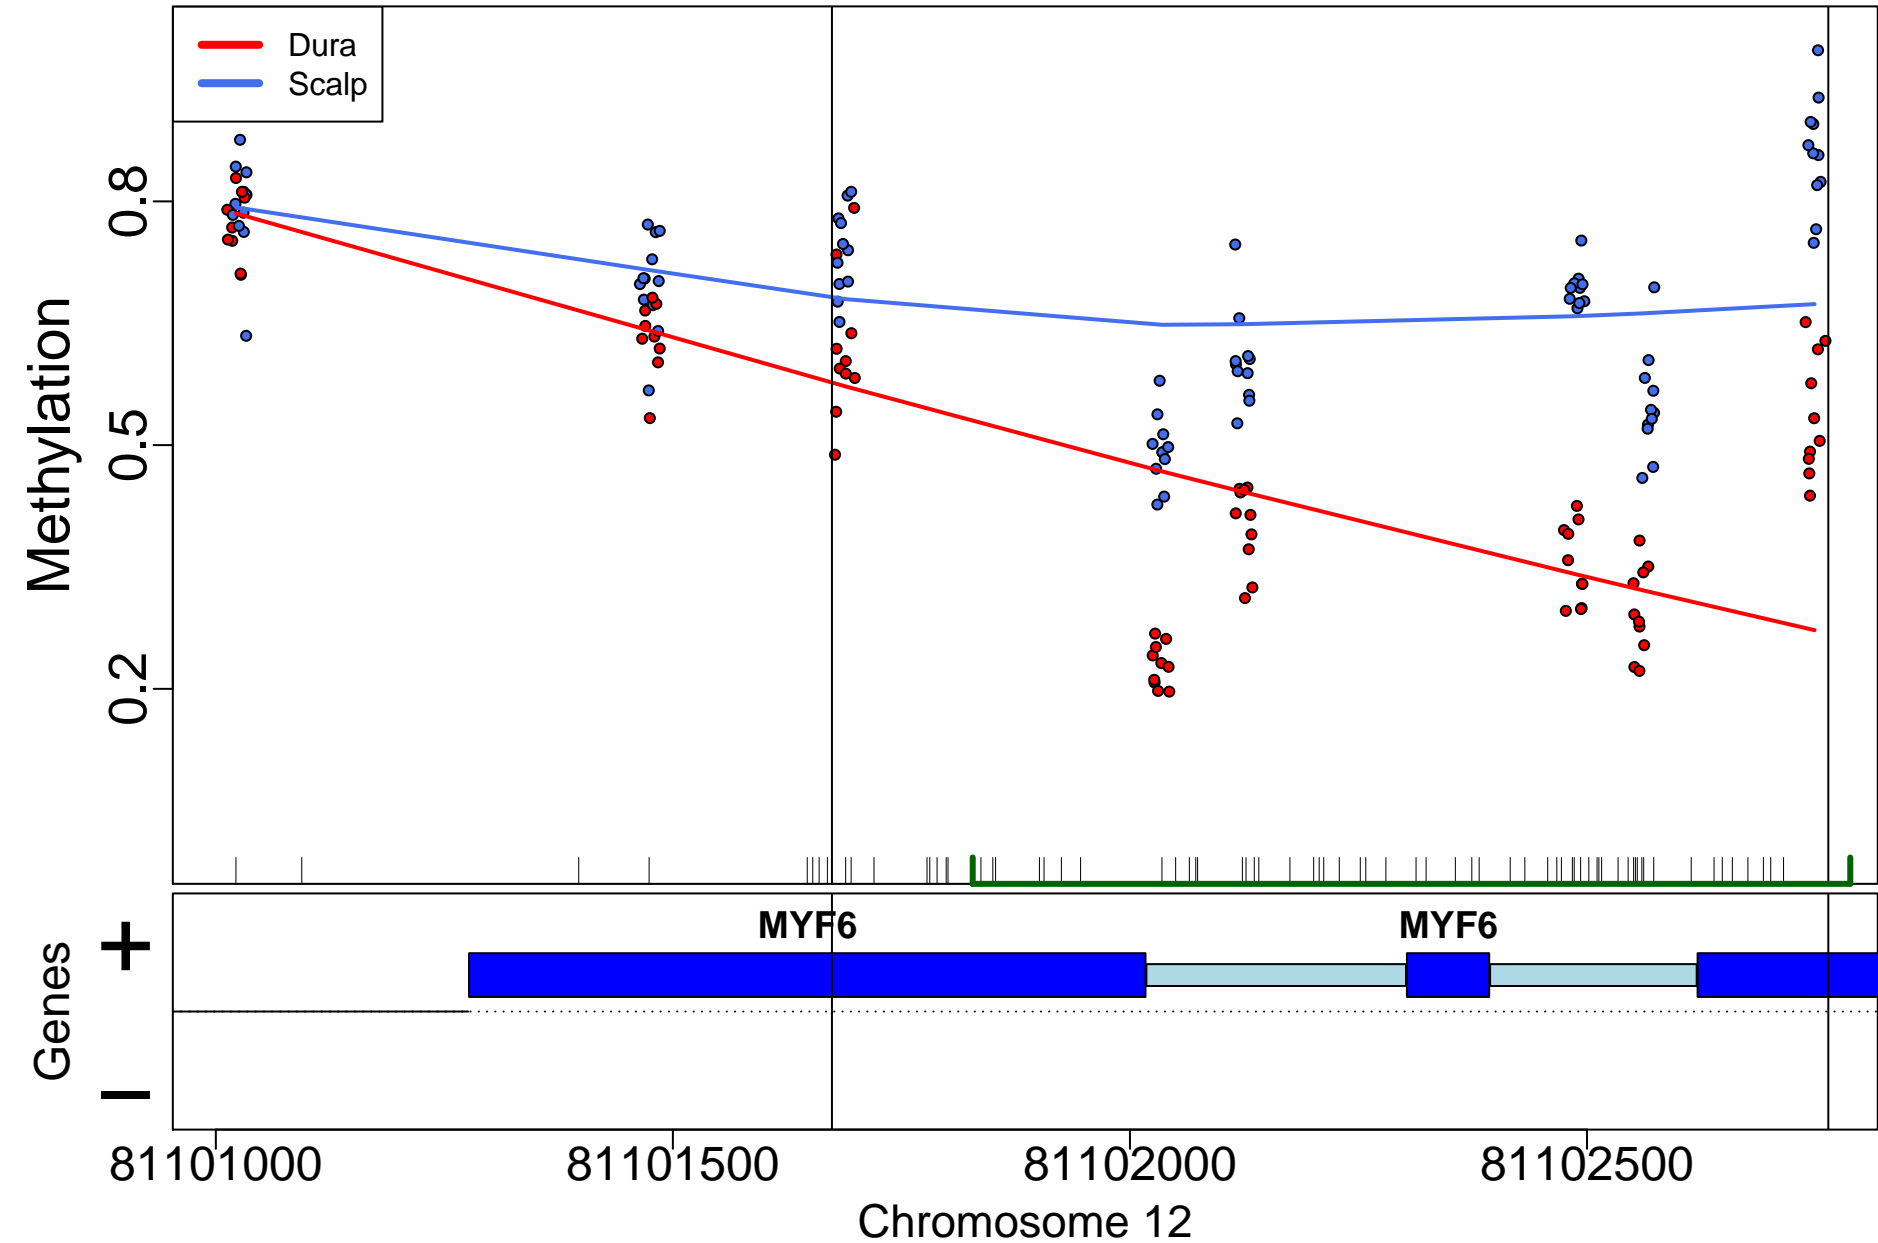

FOXC2; 1746bp from tss:promoter

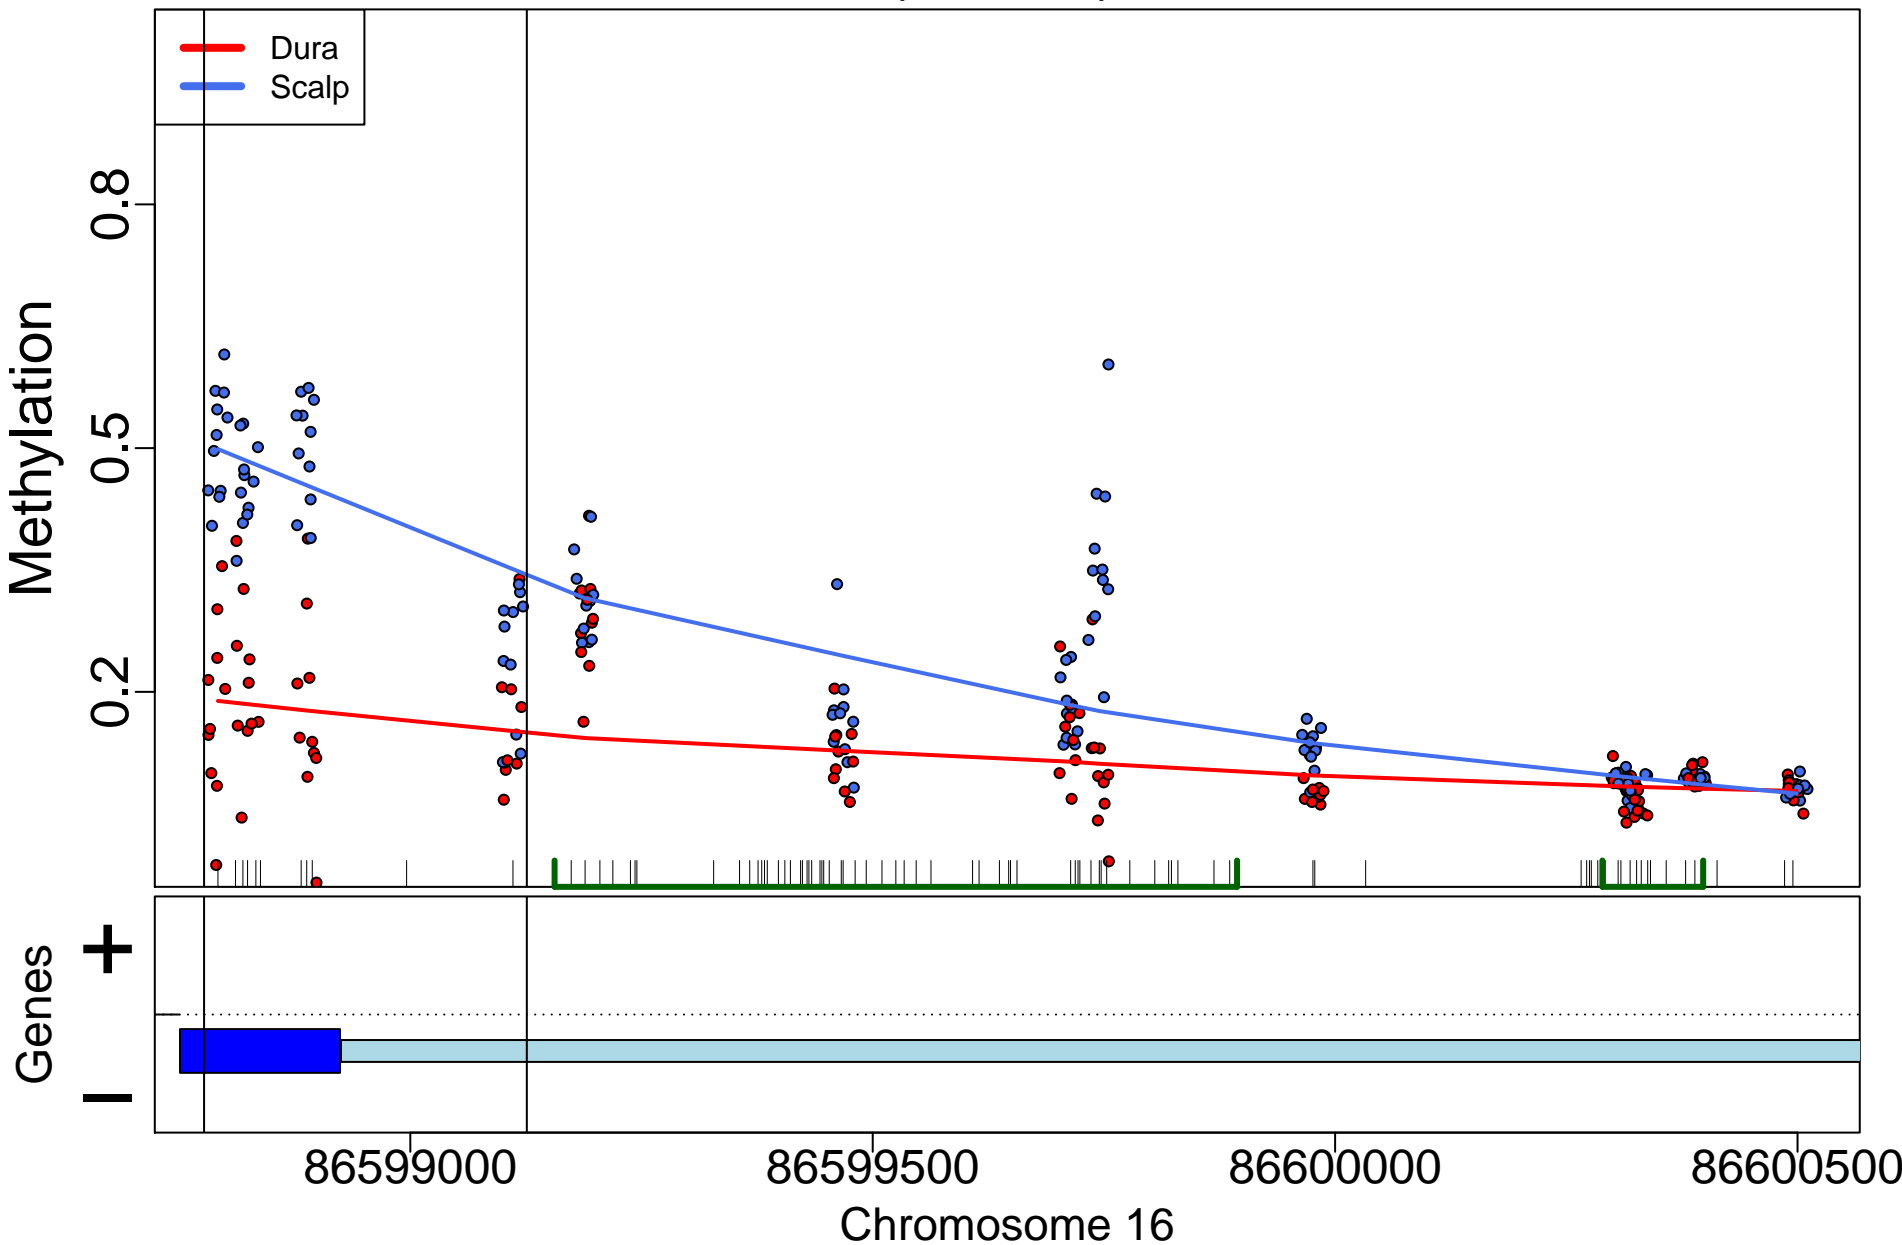

# HDAC4; 127062bp from tss:inside intron

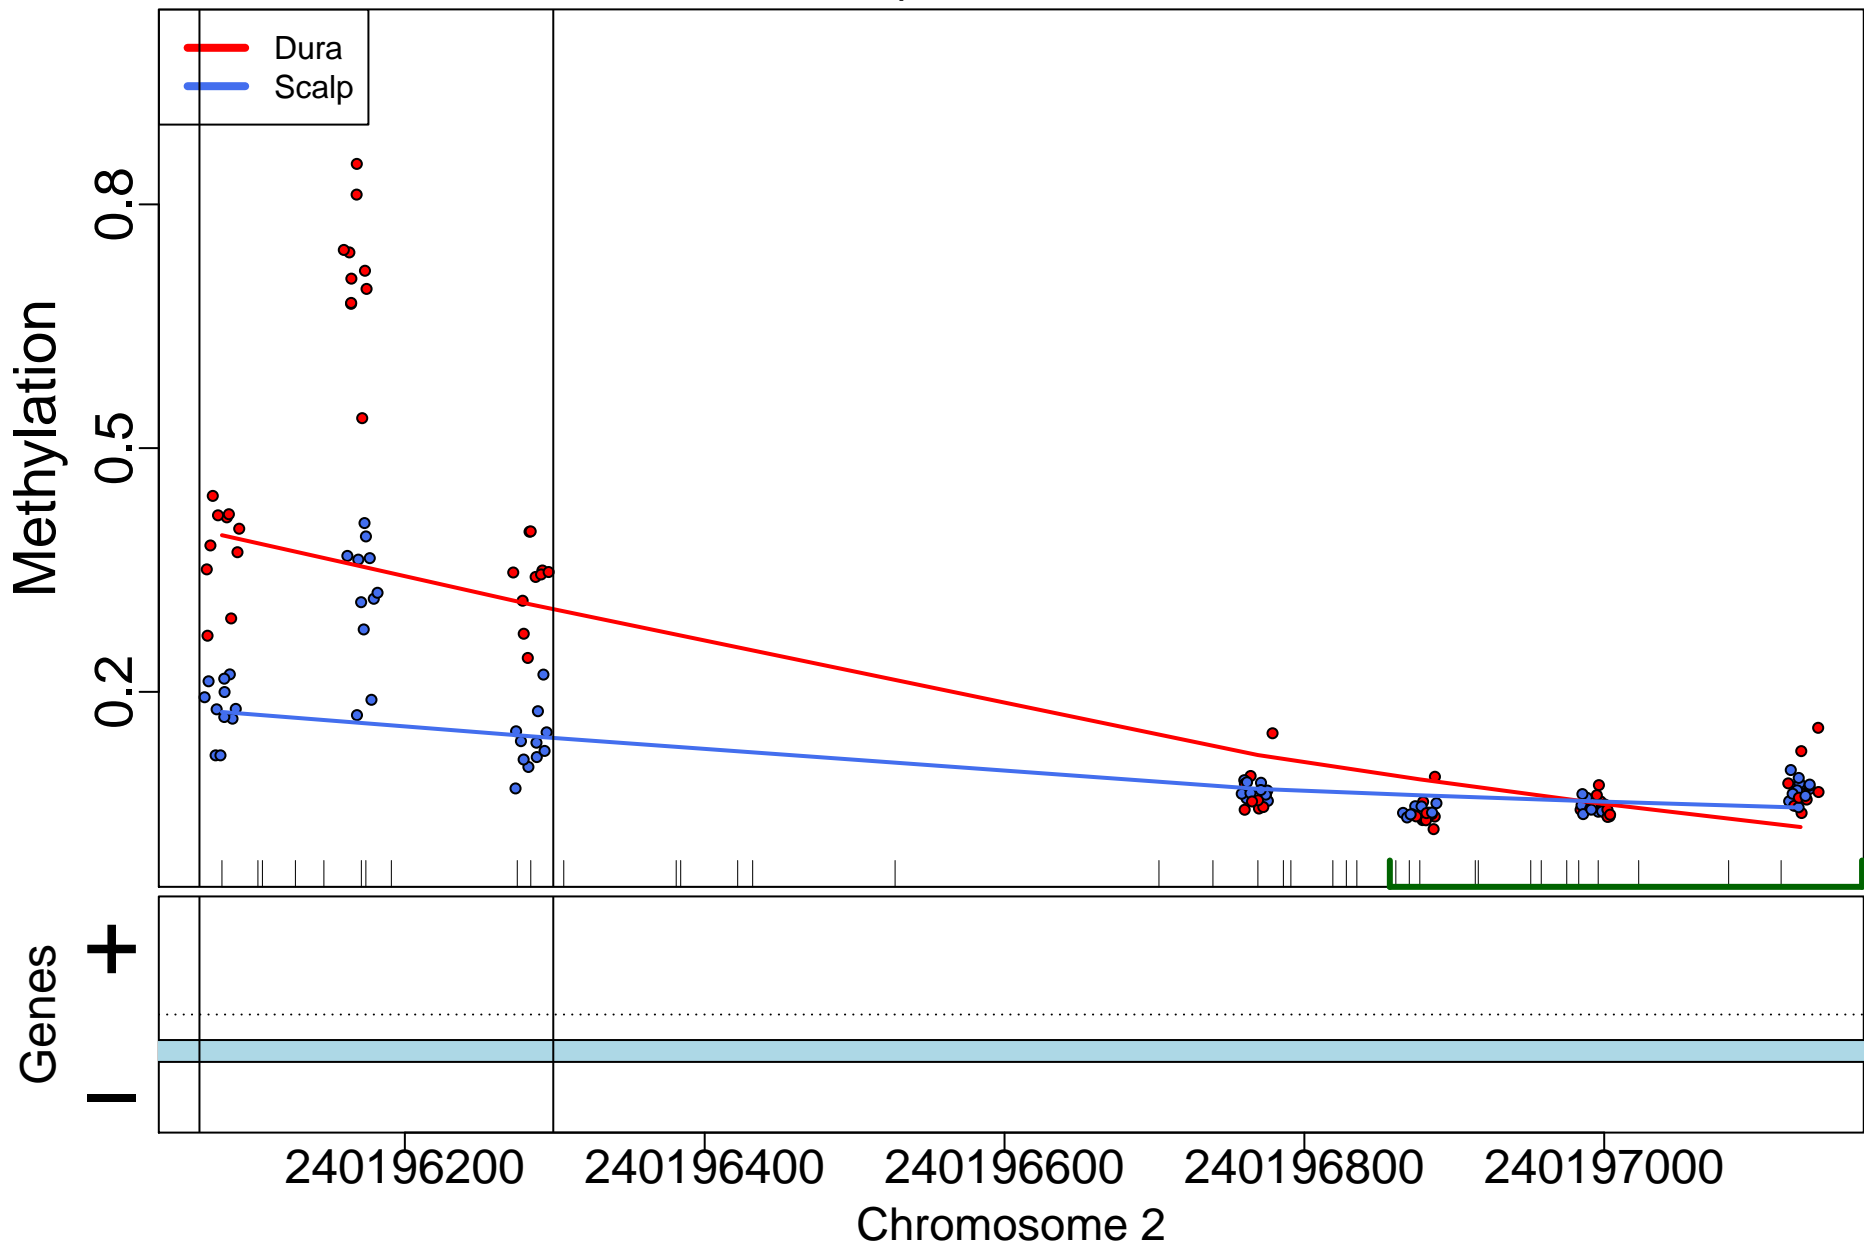

VGLL3; 1107bp from tss:inside intron

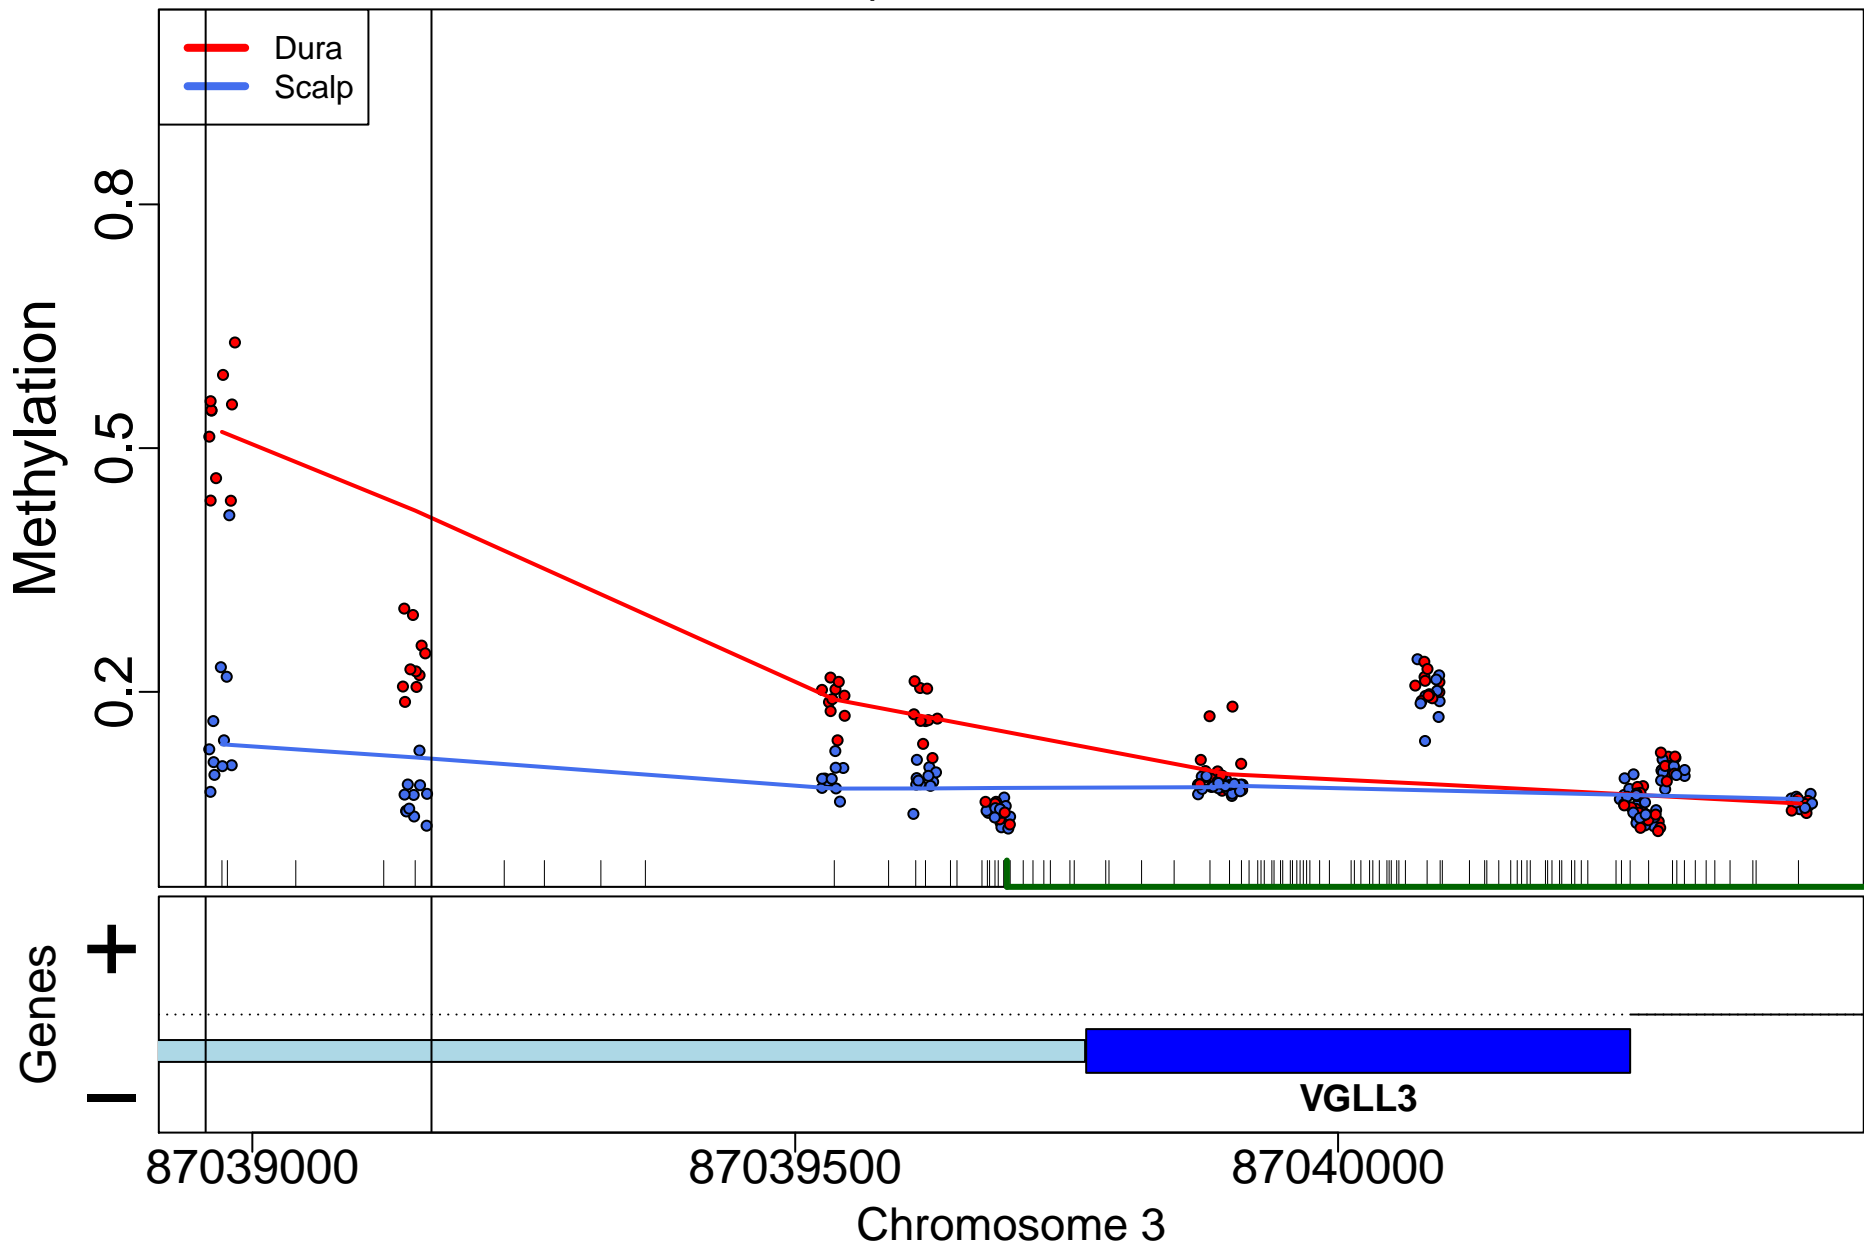

FXJD4; 48181bp from tss:upstream

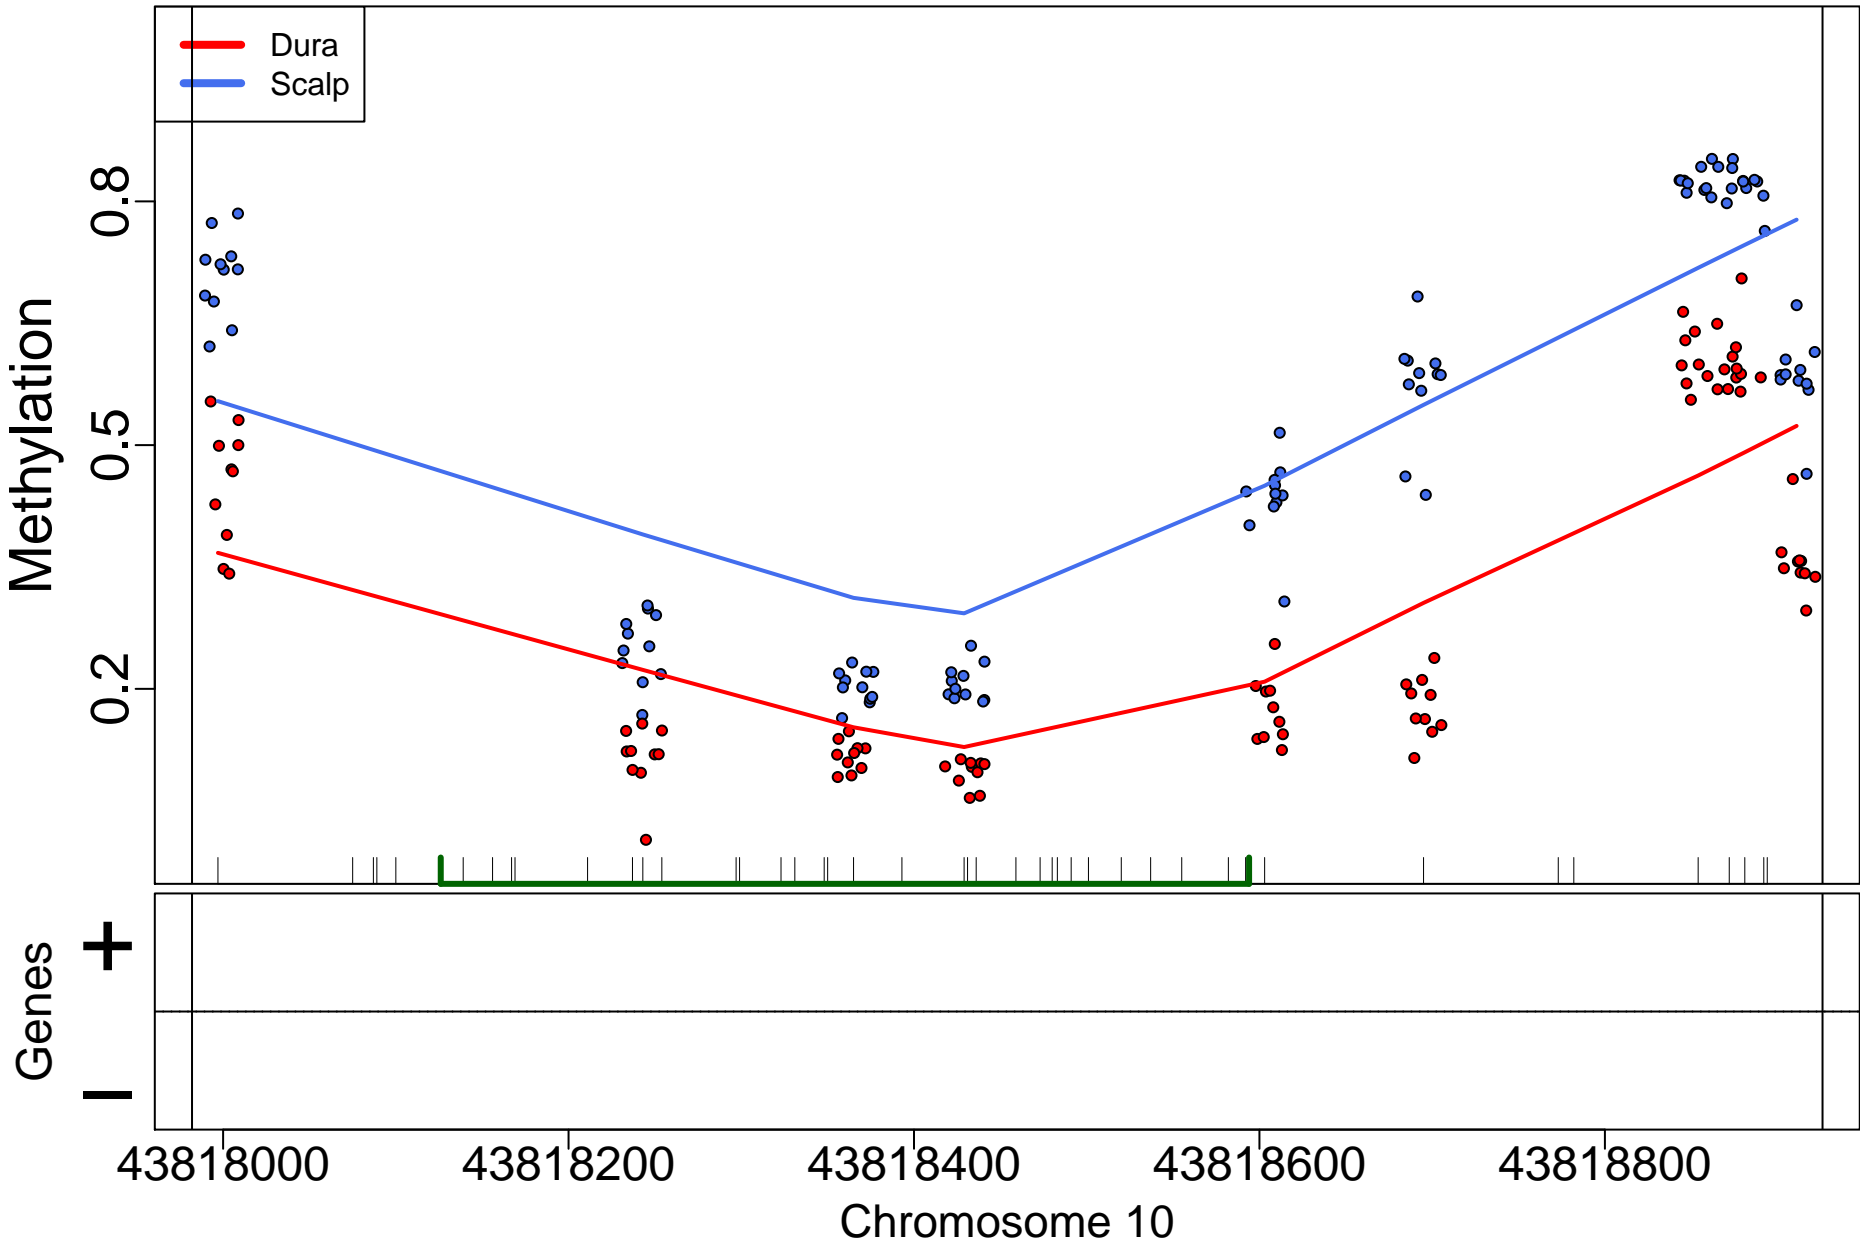

EPHB3; 69975bp from tss:downstream

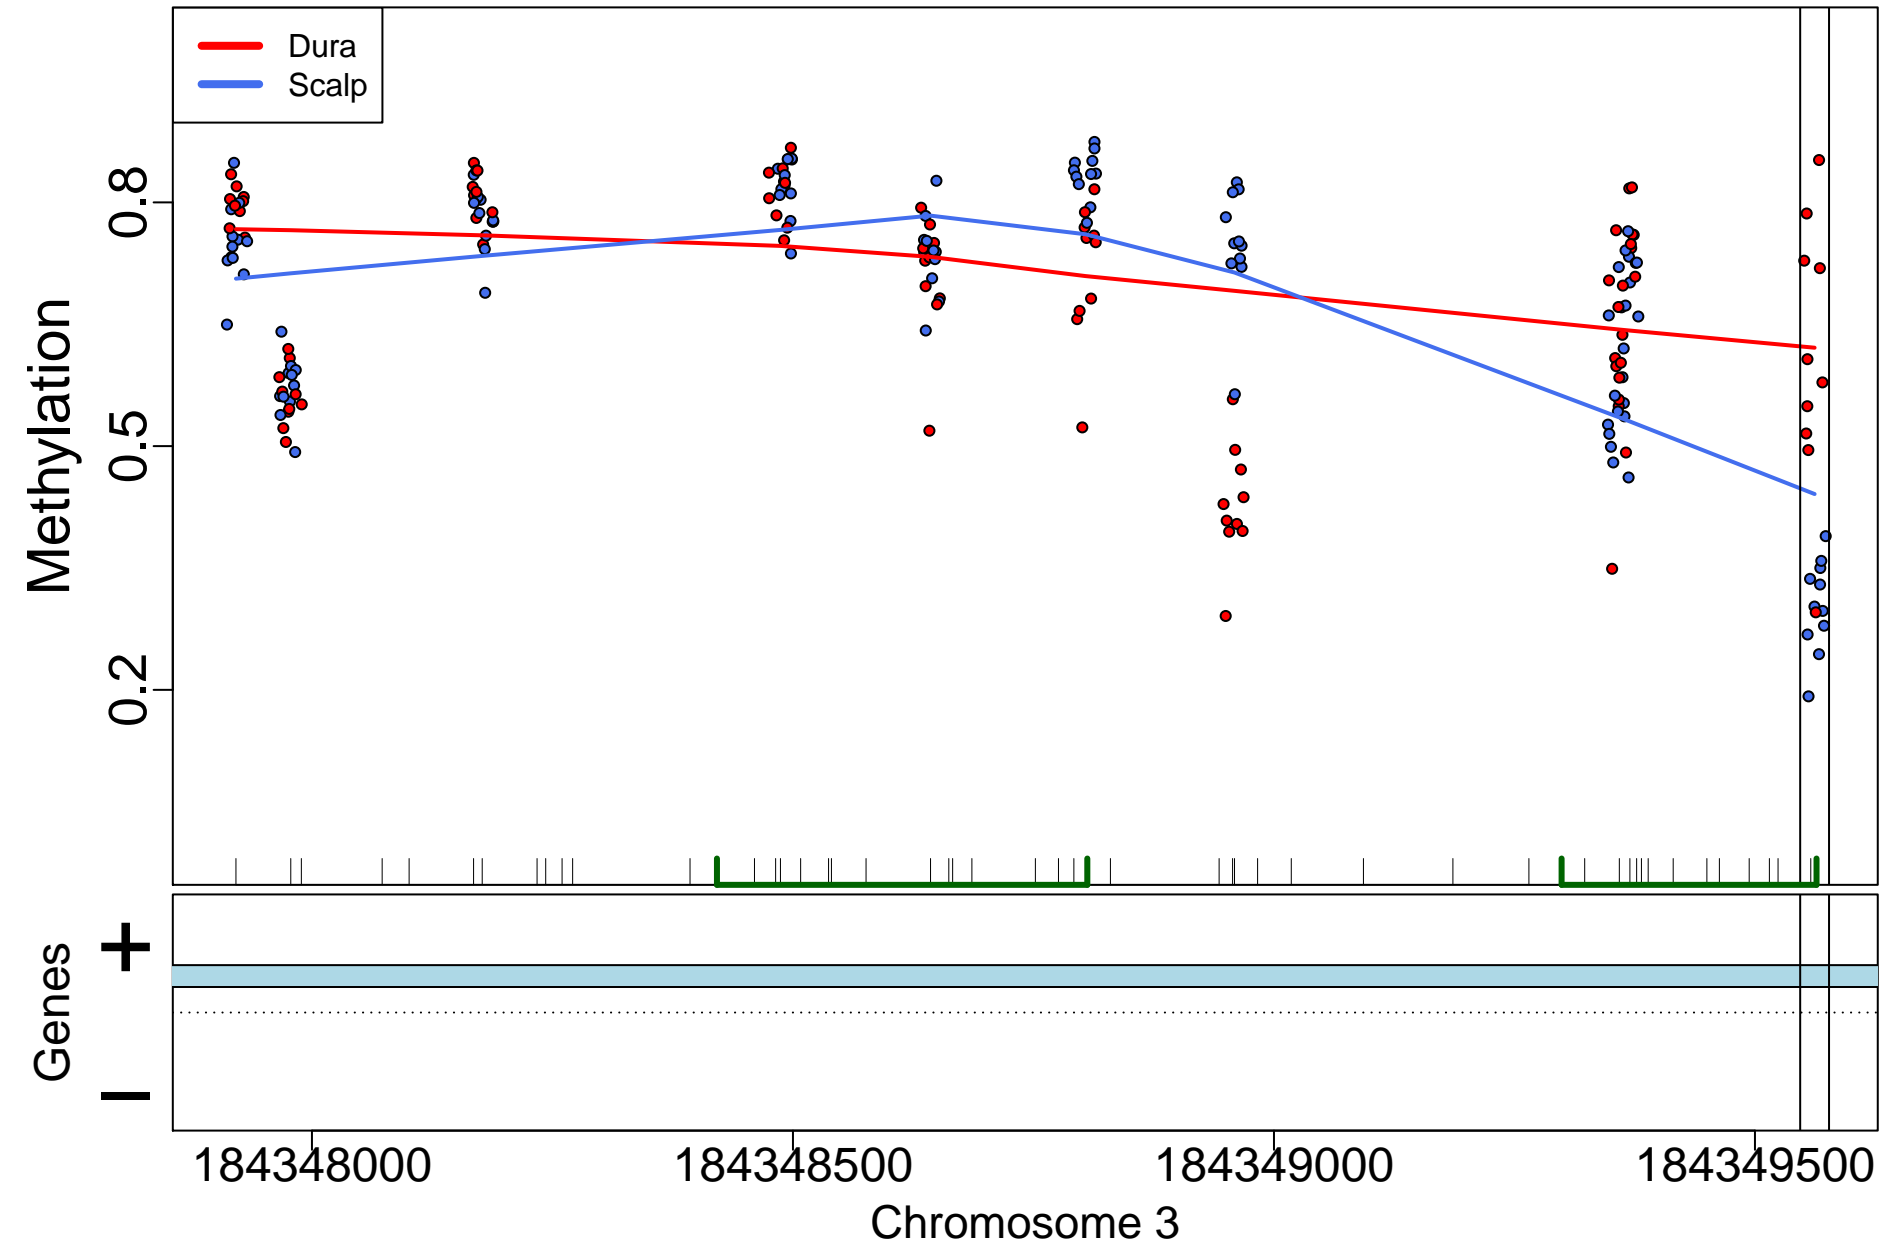



# KANSL1L; 1259bp from tss:promoter

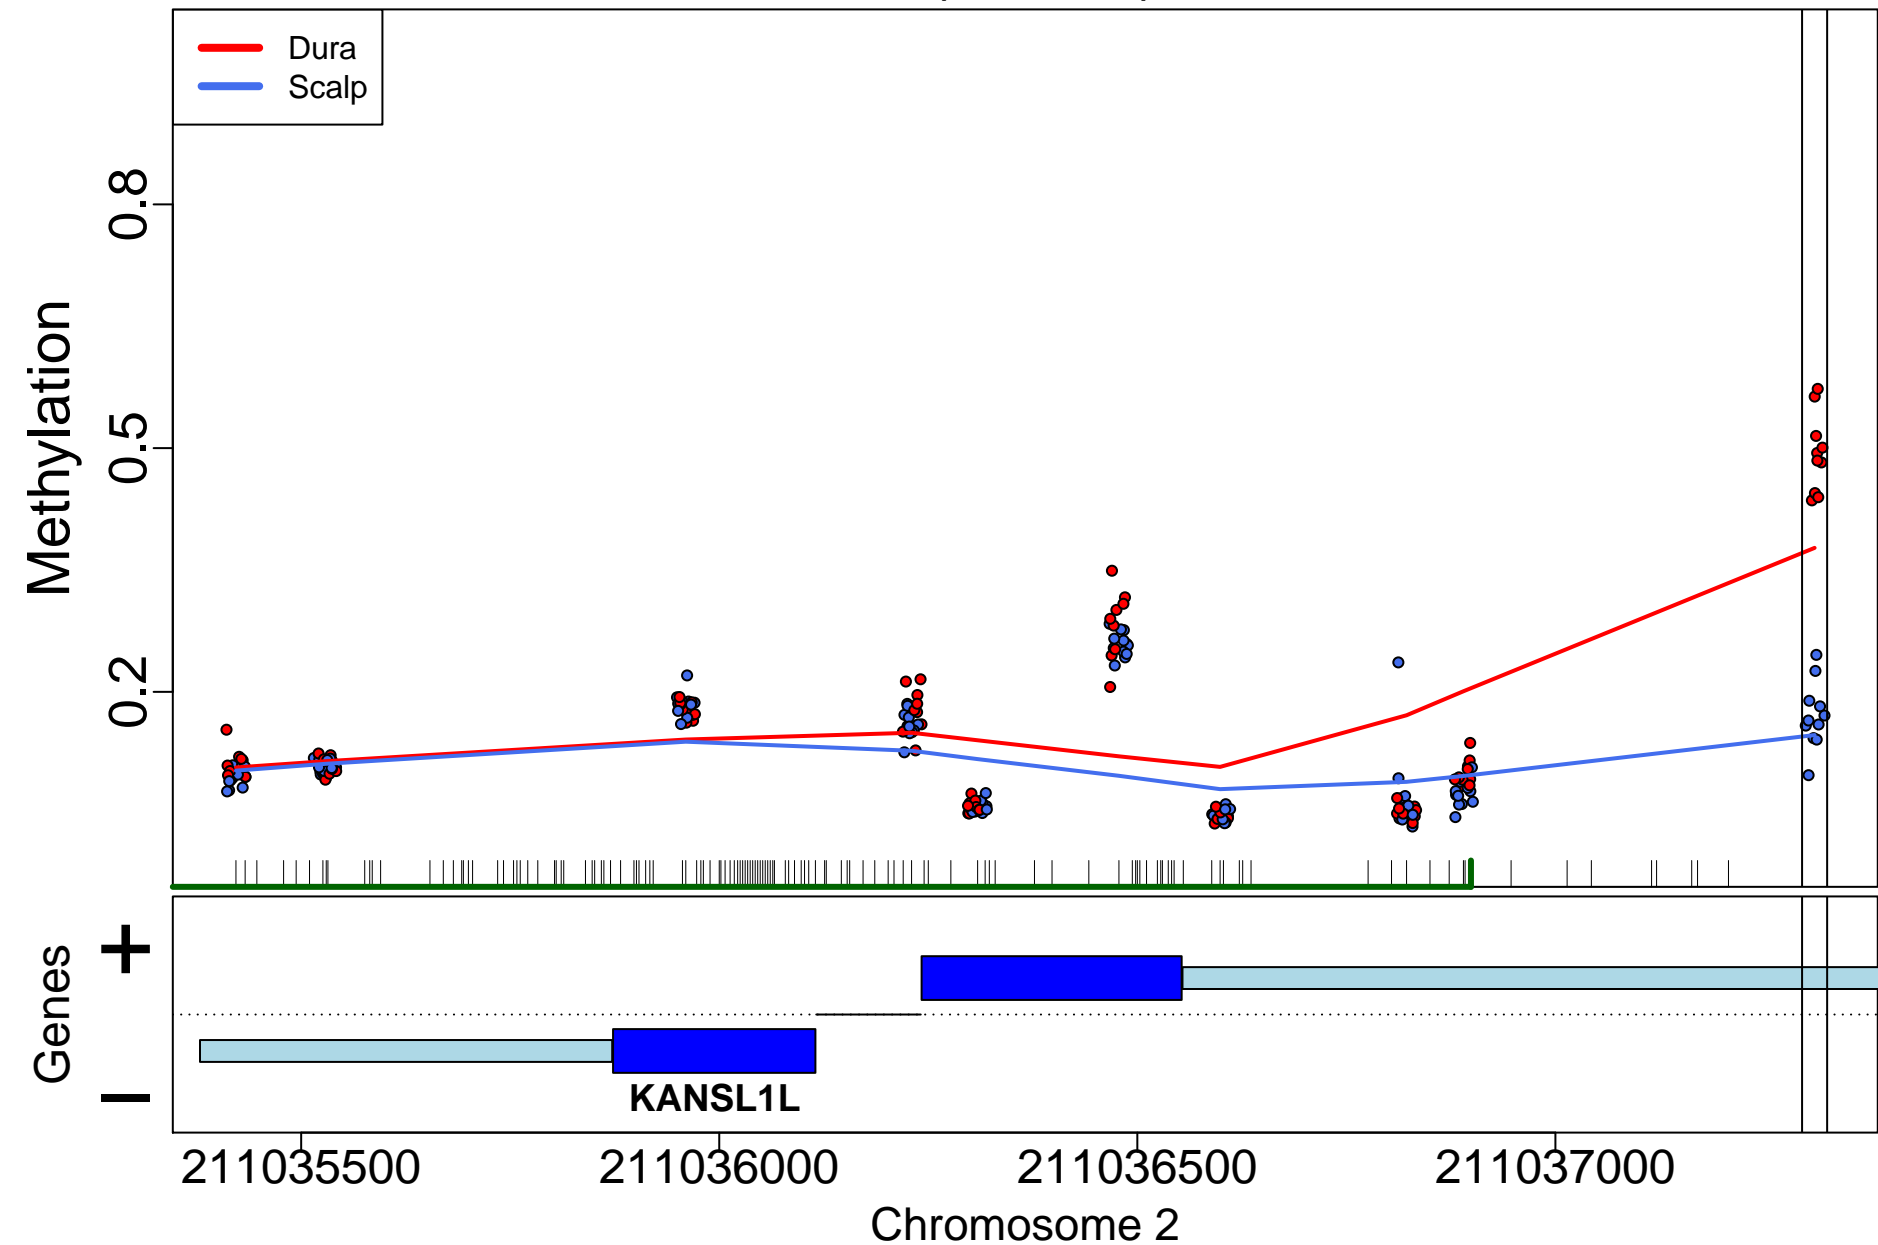

C1orf87; 0bp from tss:overlaps 5'

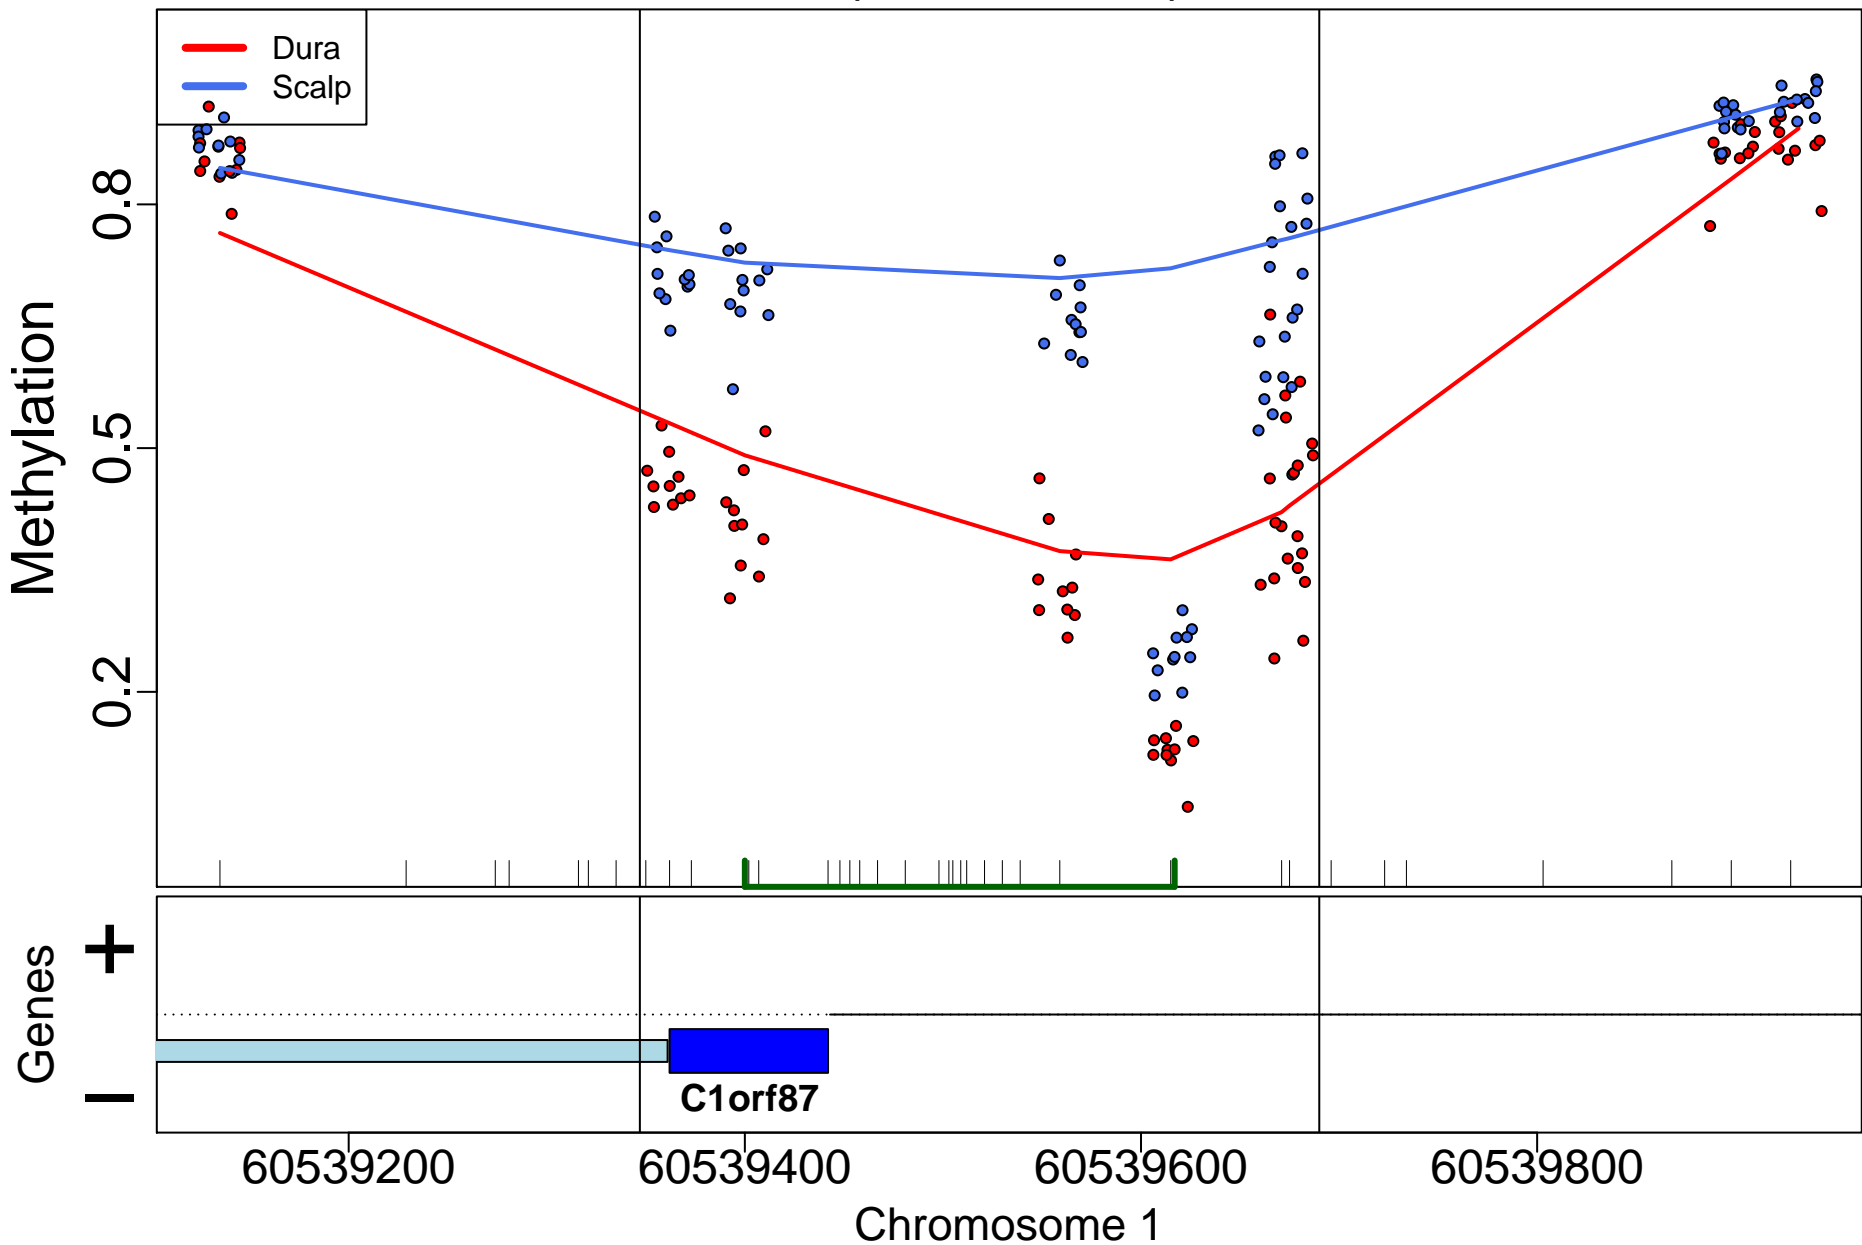

TMEM72-AS1; 0bp from tss:NA

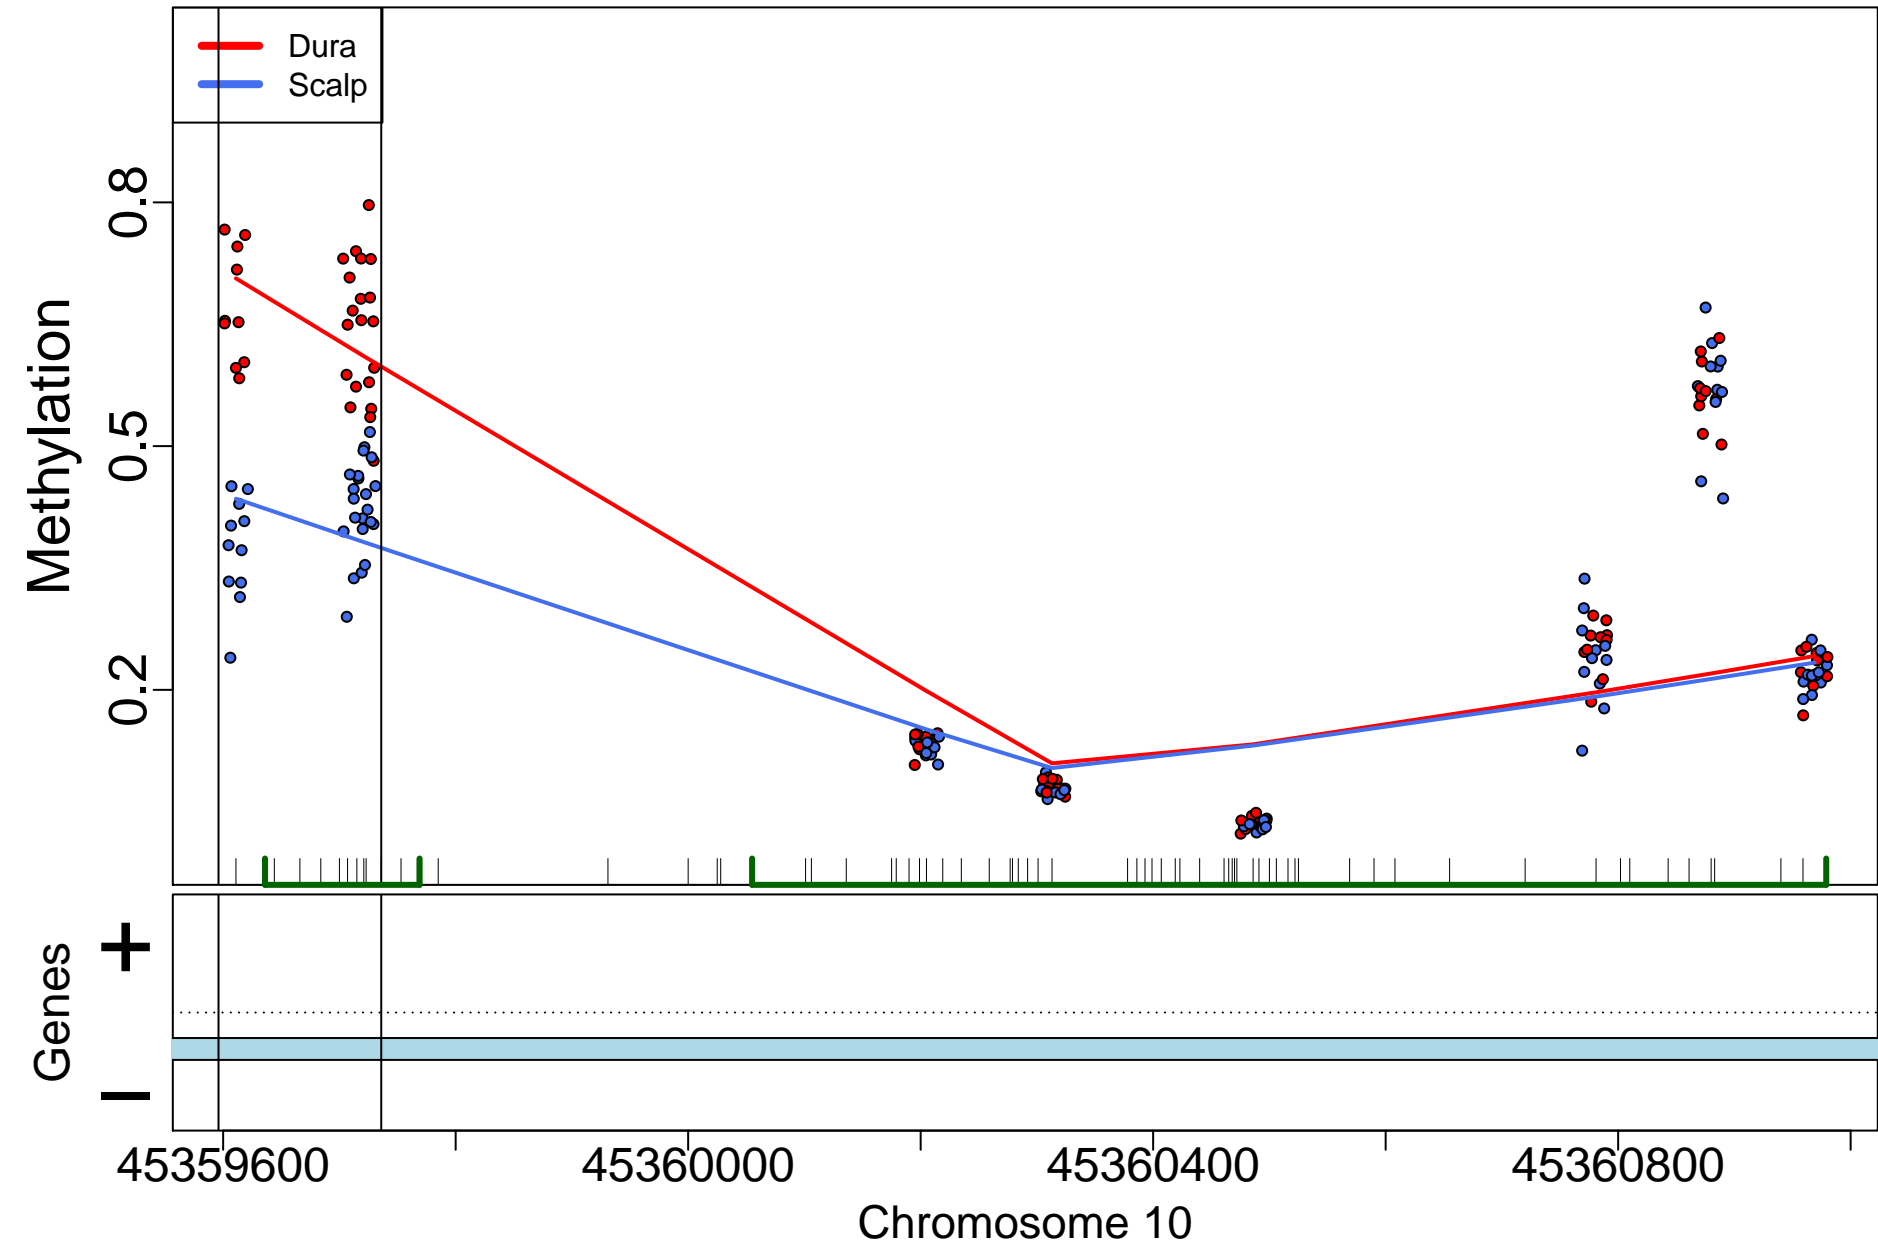

## COL7A1; 848bp from tss:promoter

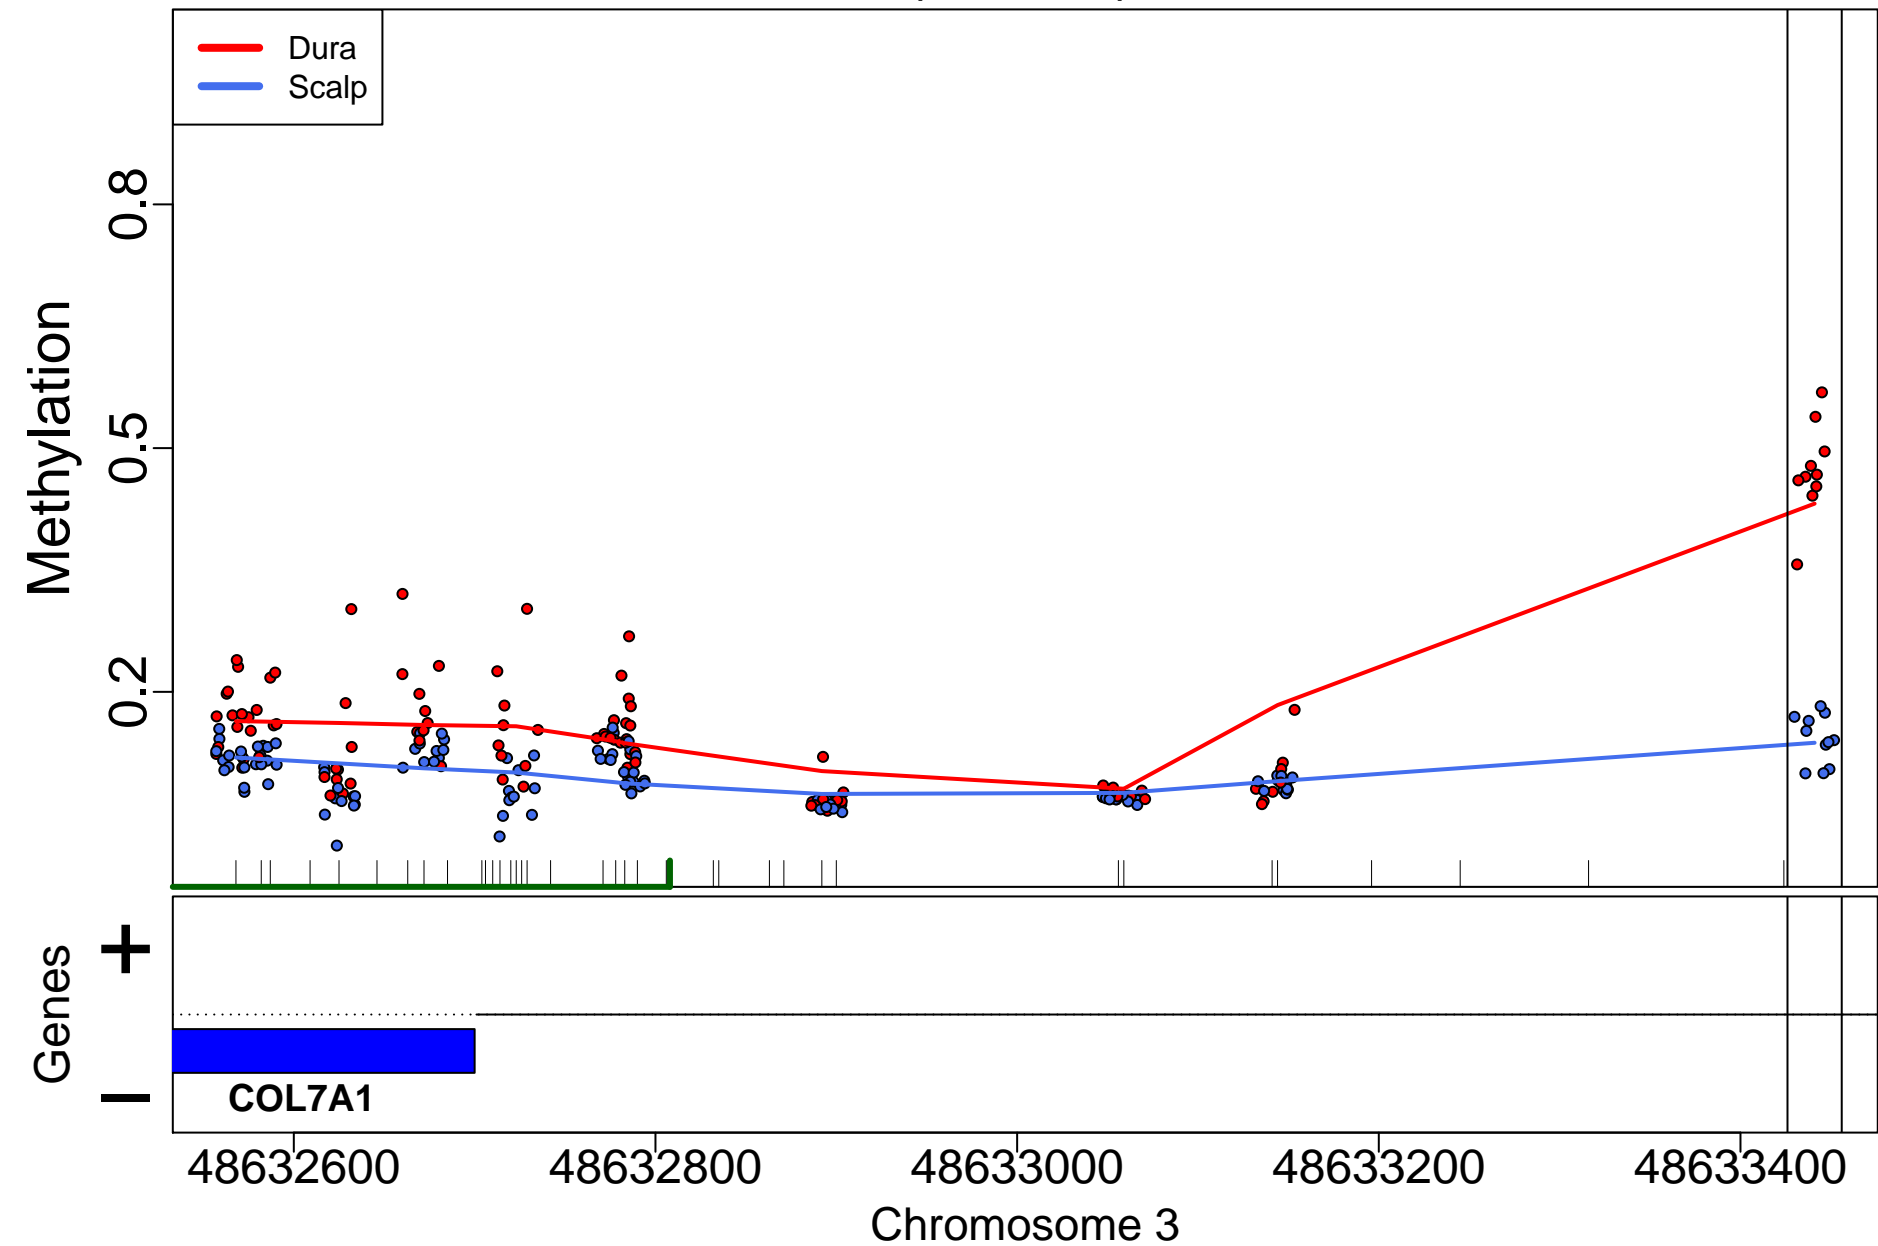

MIB2; 1055bp from tss:overlaps 3'

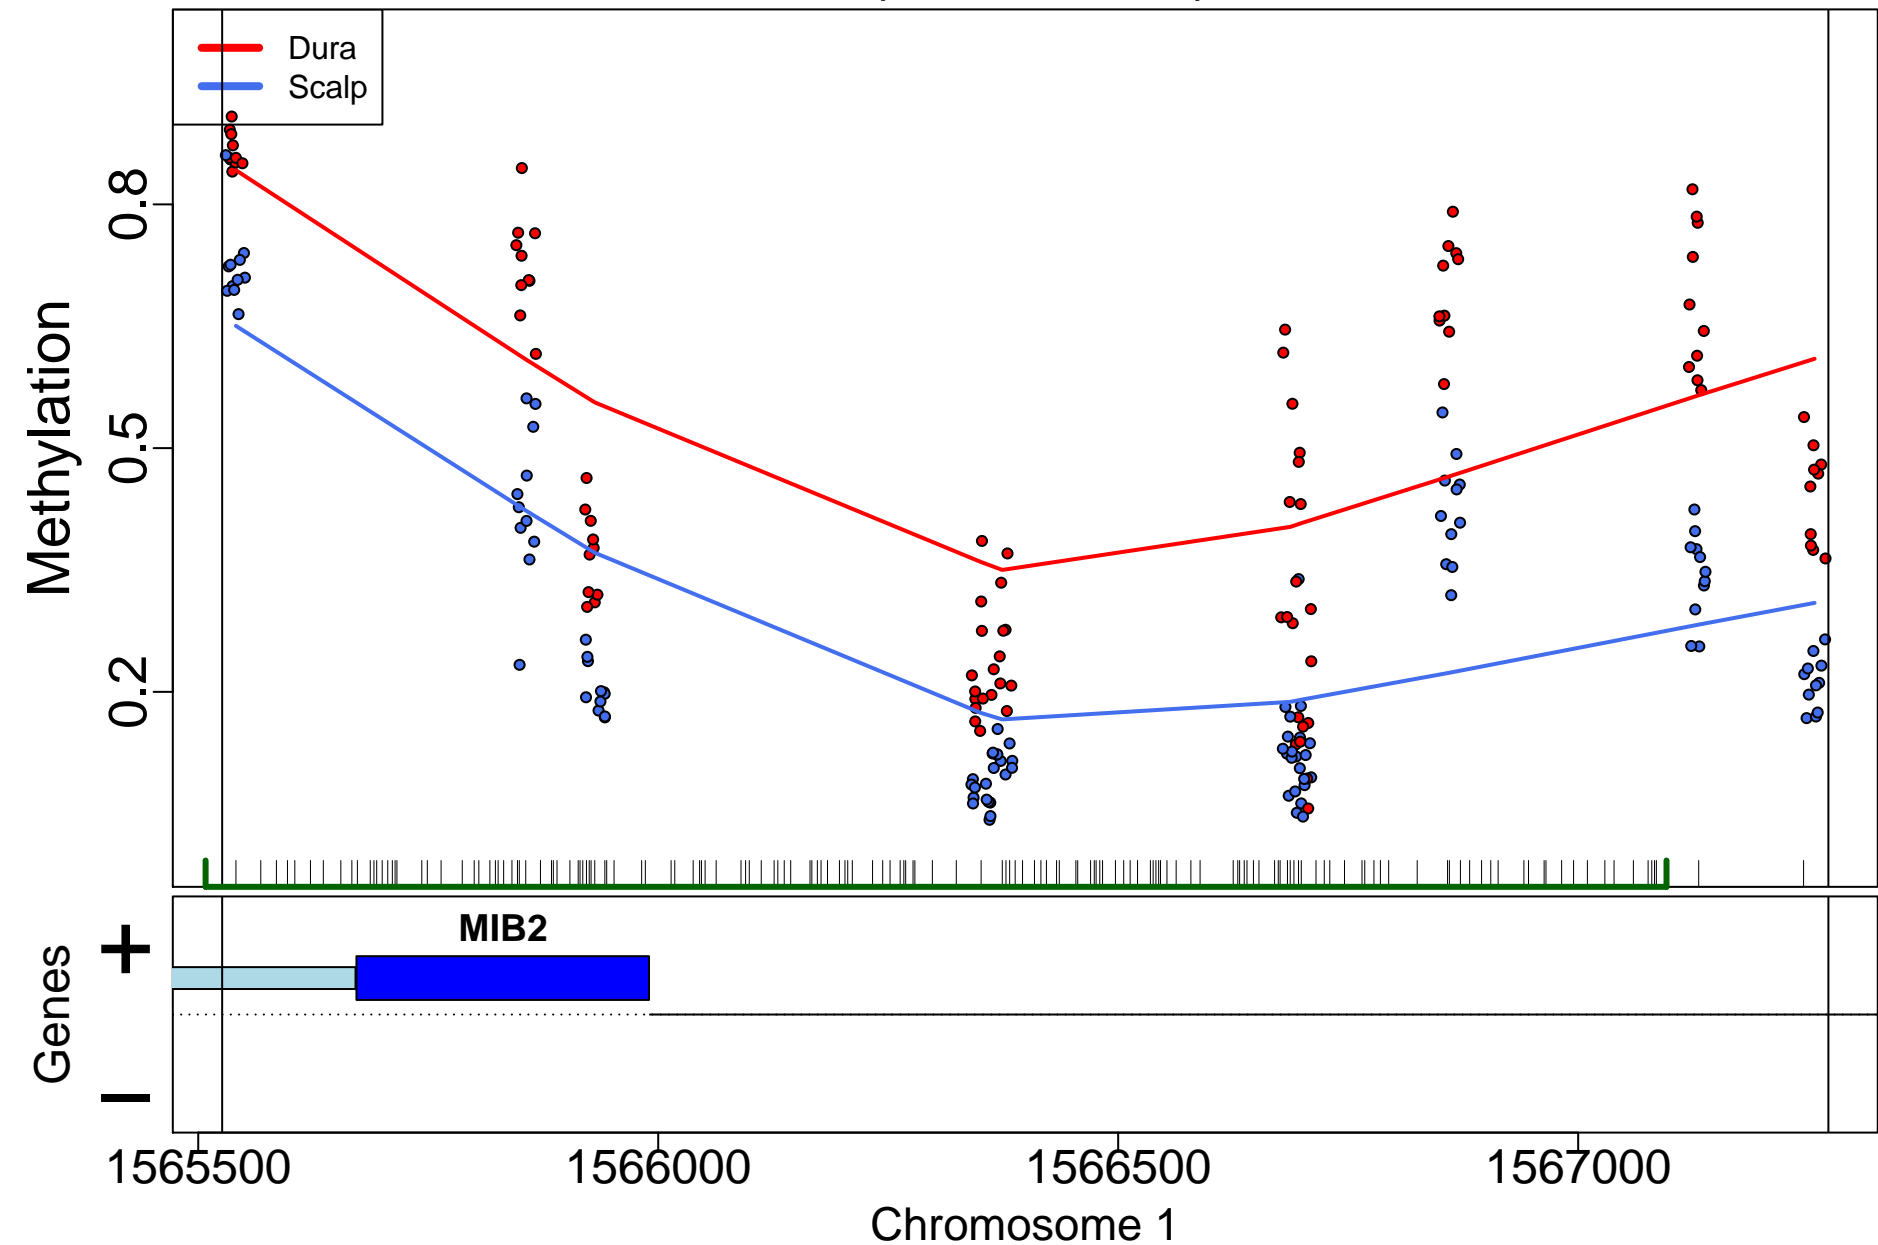

# HAND2; 7288bp from tss:downstream

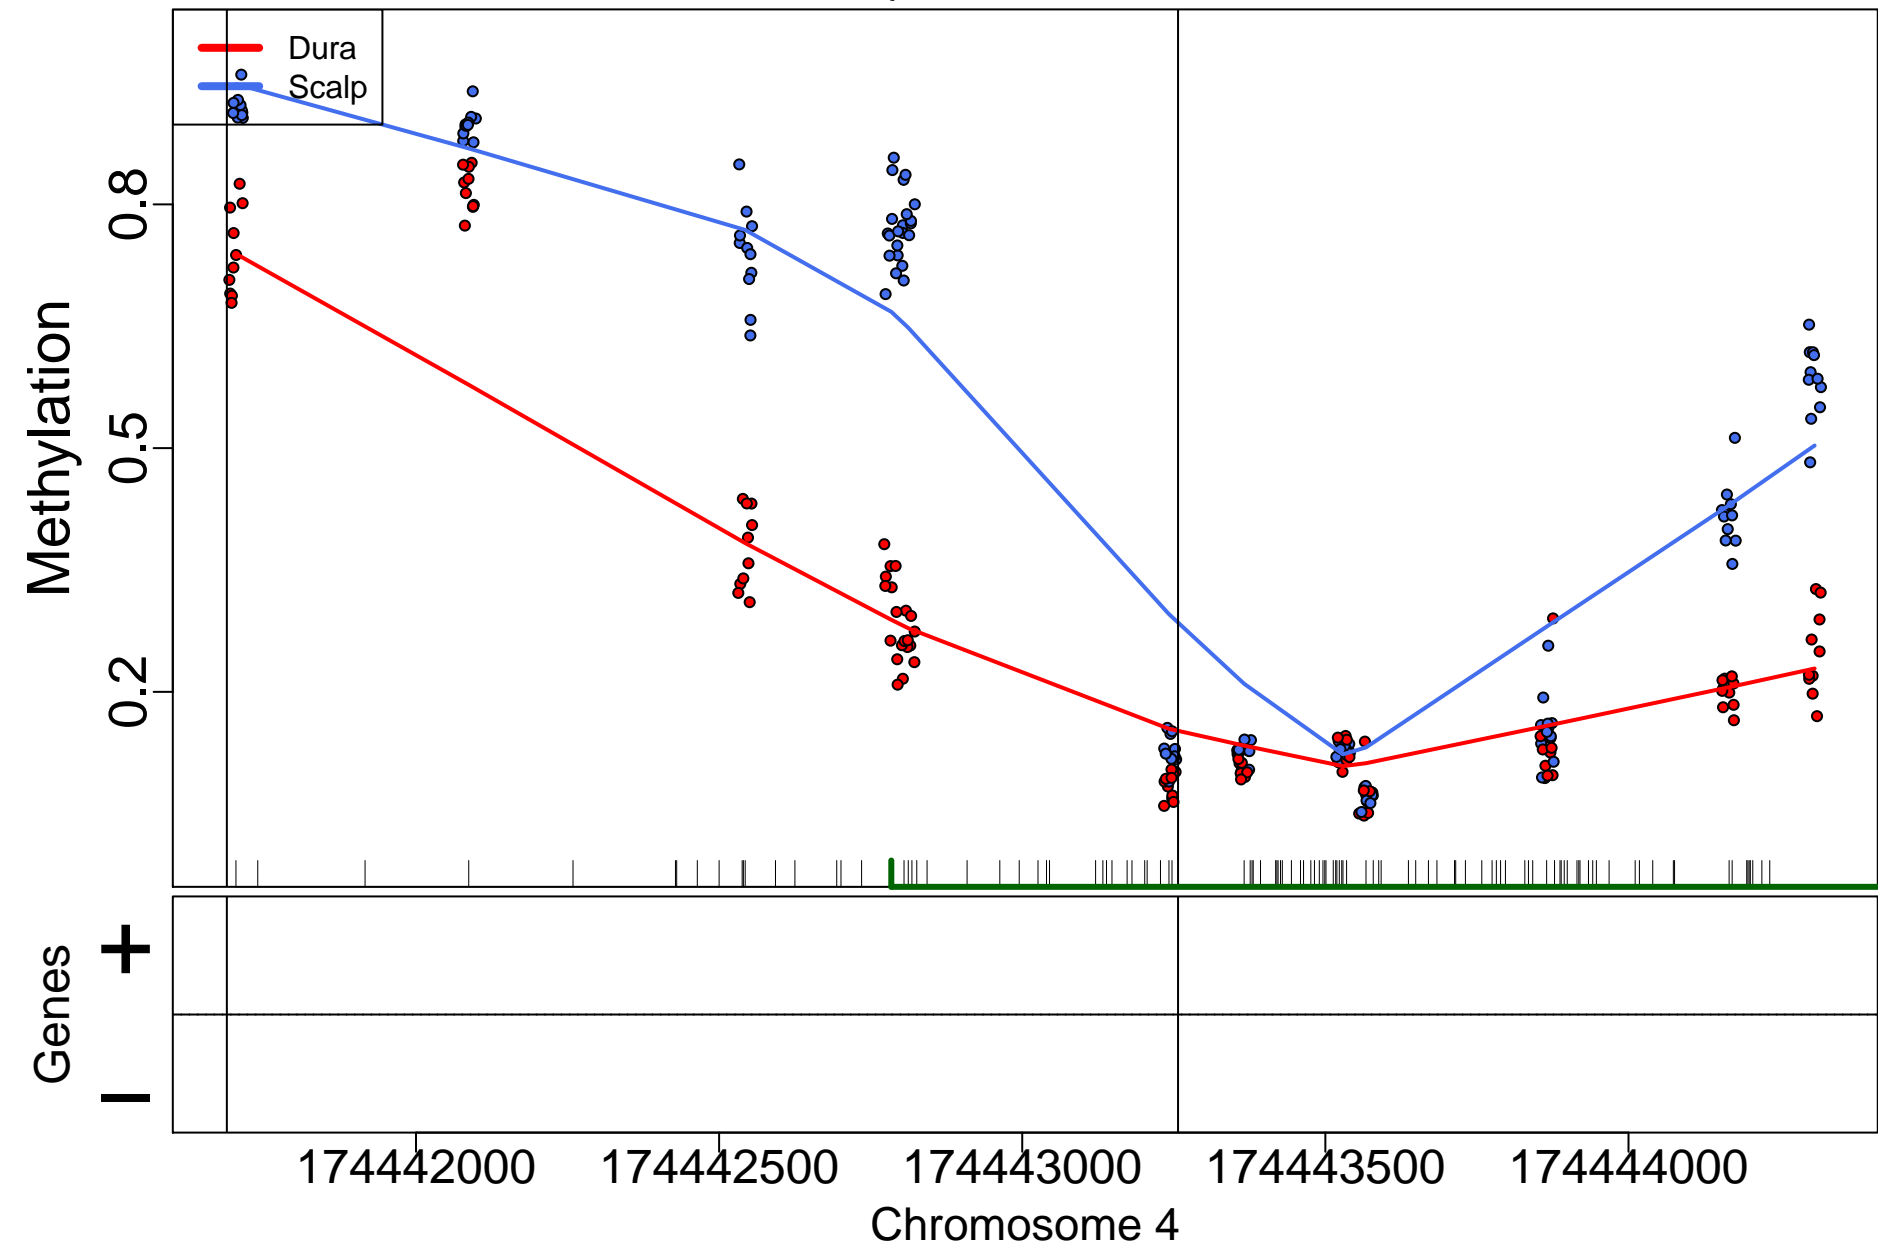

CAPN15; 27079bp from tss:downstream

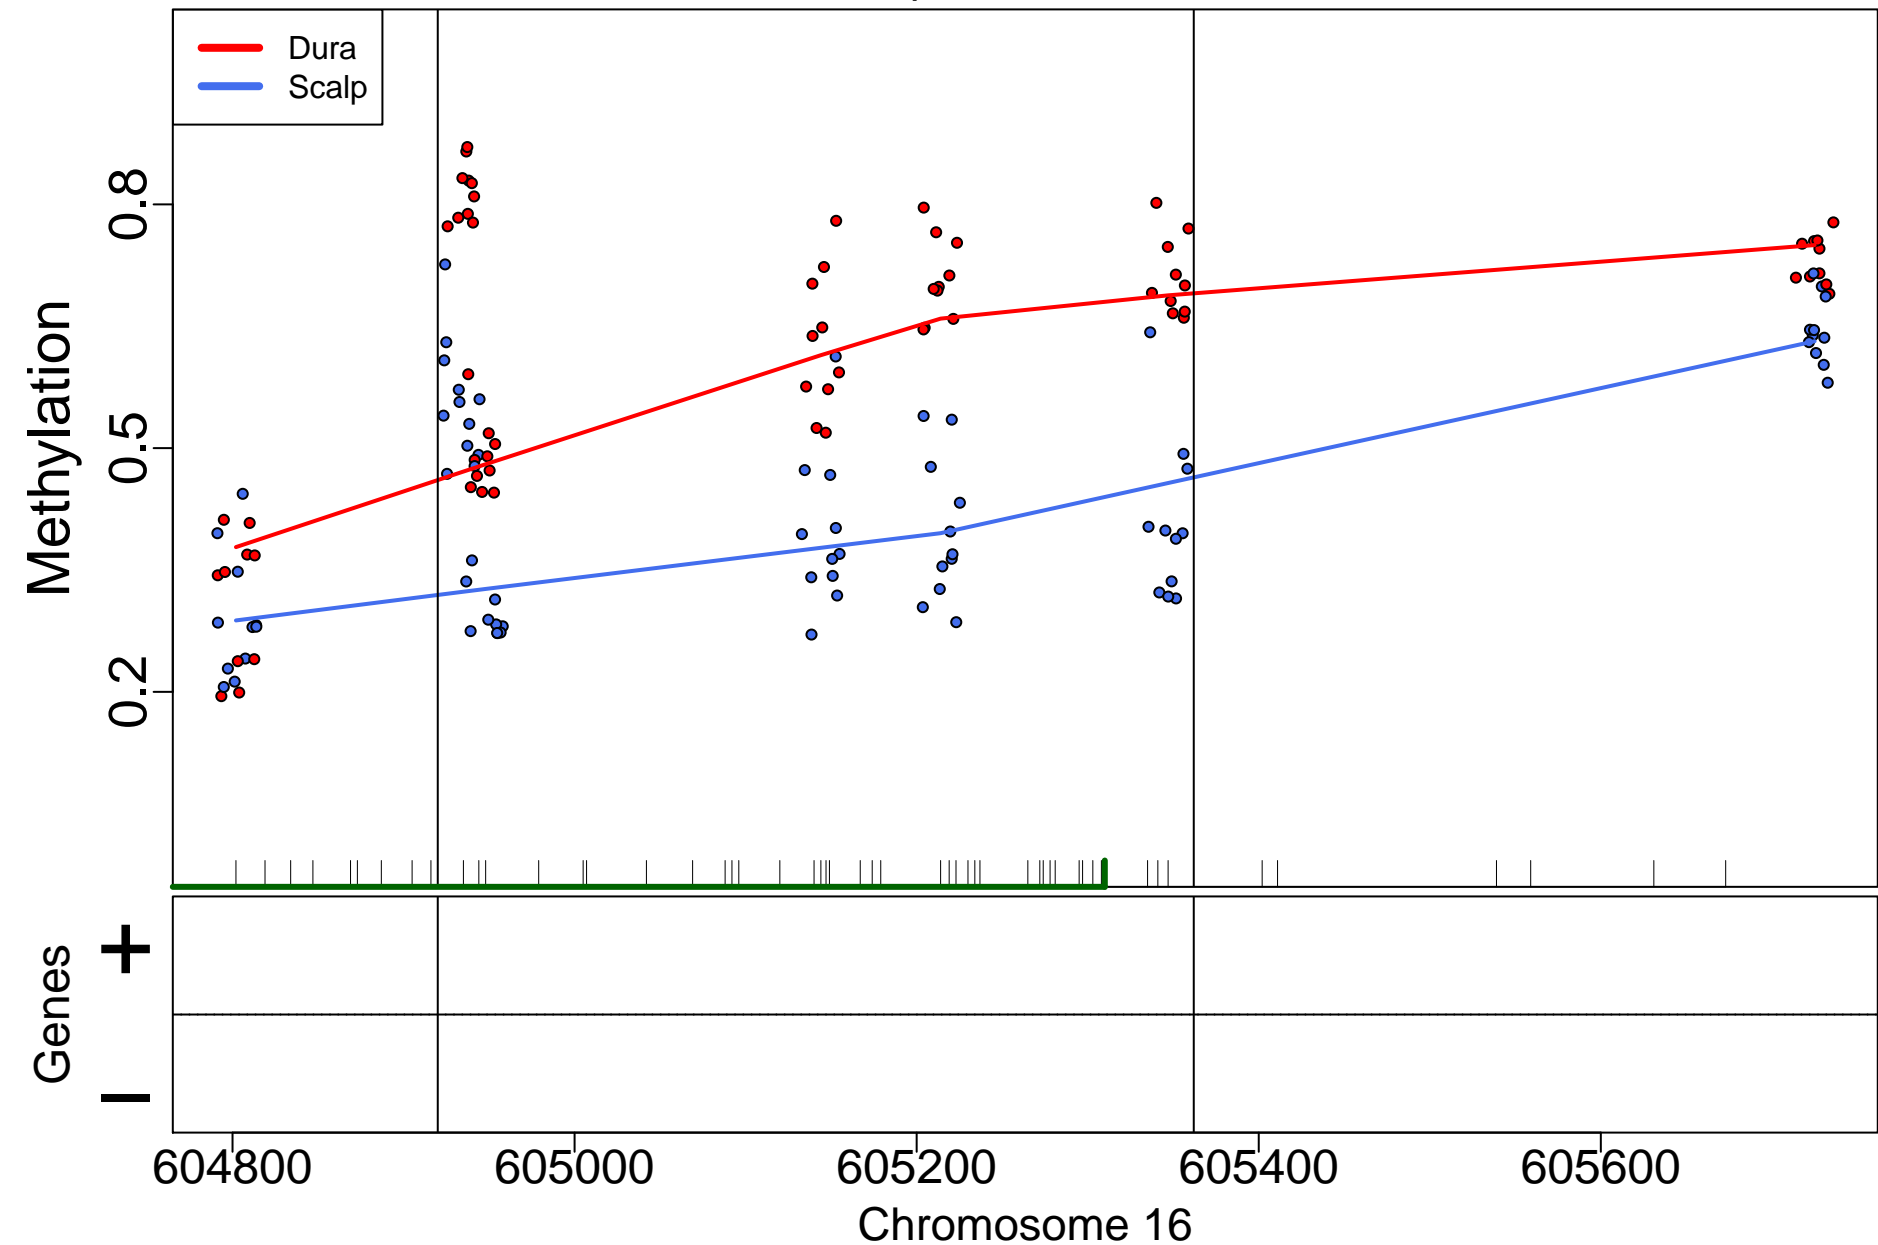

DYNLRB1; 620bp from tss:promoter

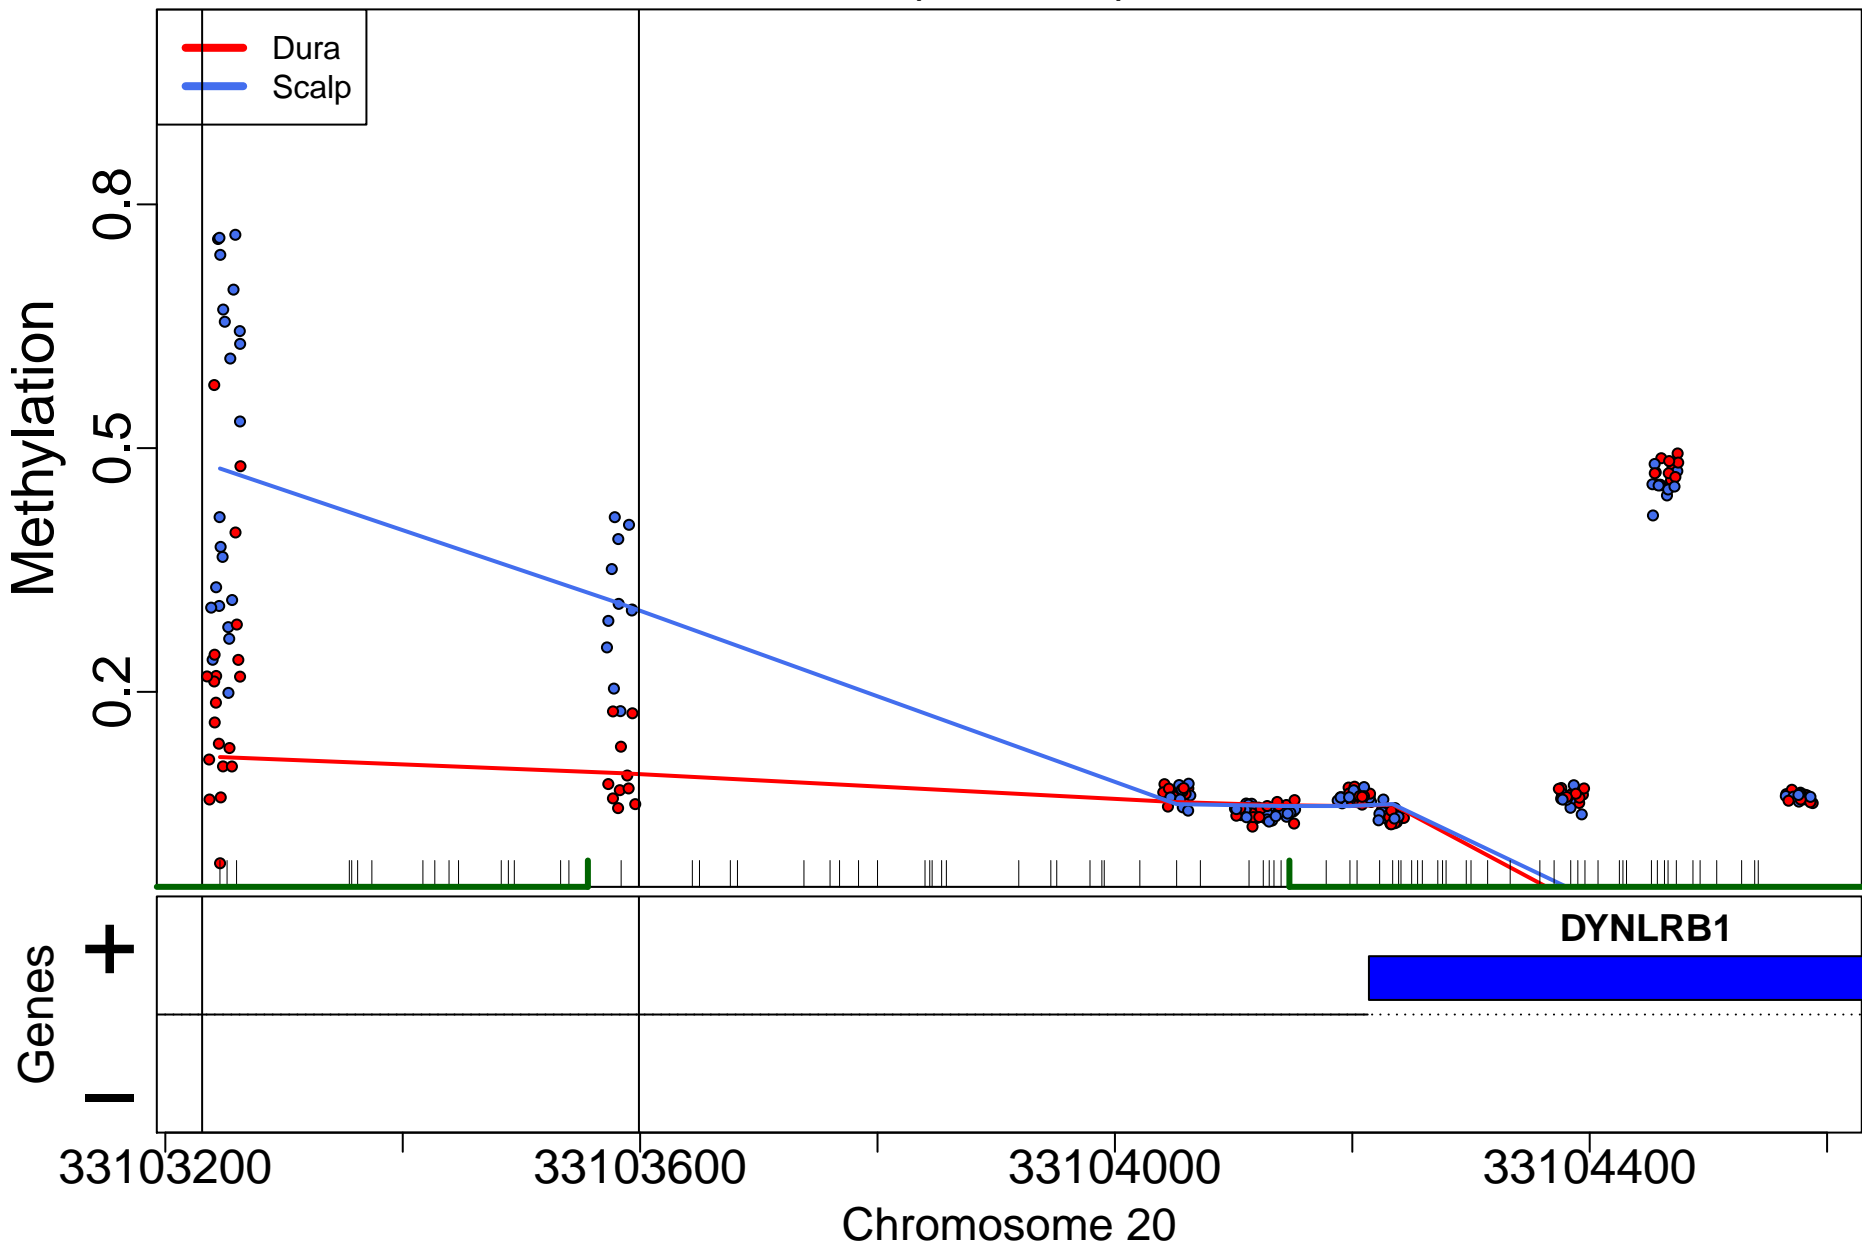



SLC41A3; 0bp from tss:overlaps 5'

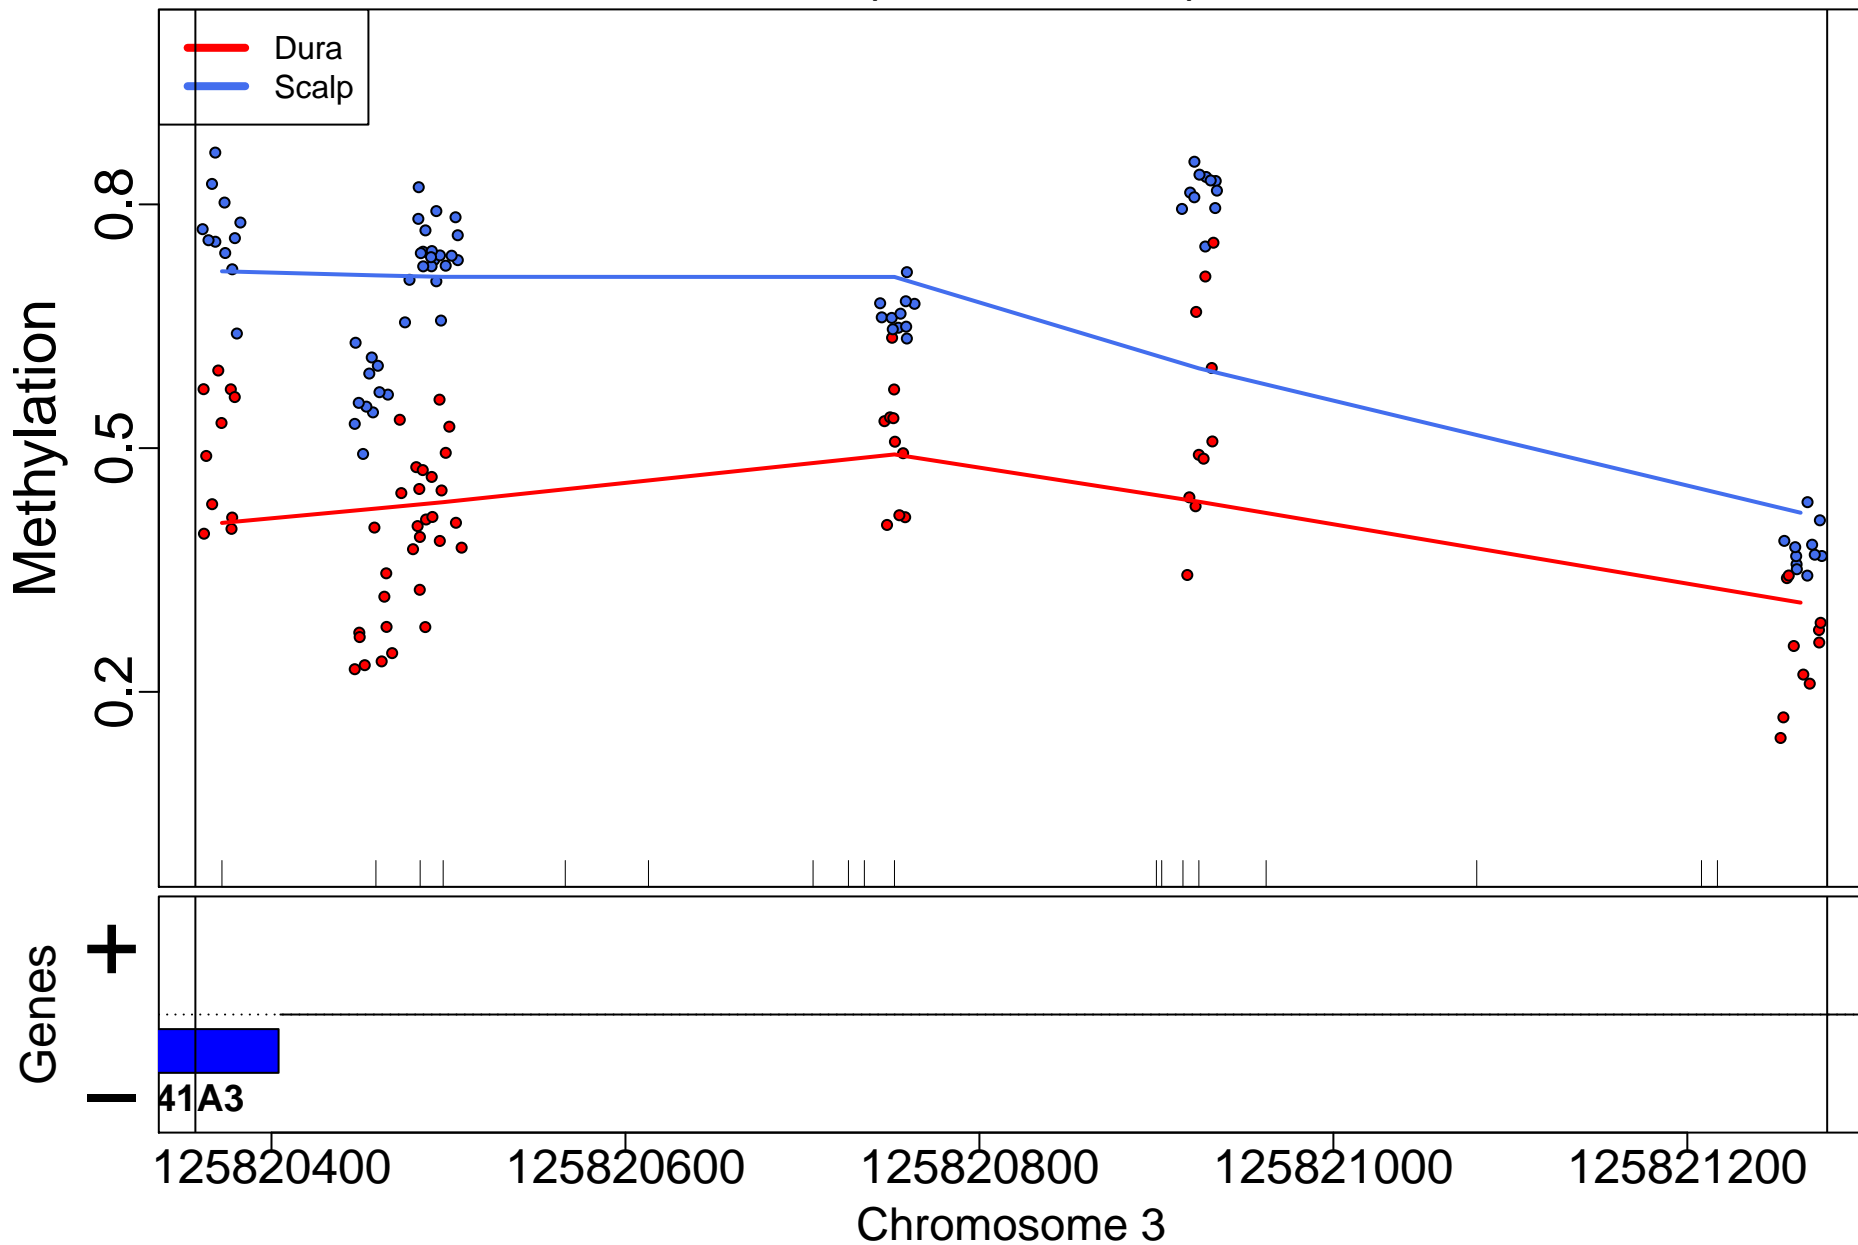

TMCO3; 56275bp from tss:covers exon(s)

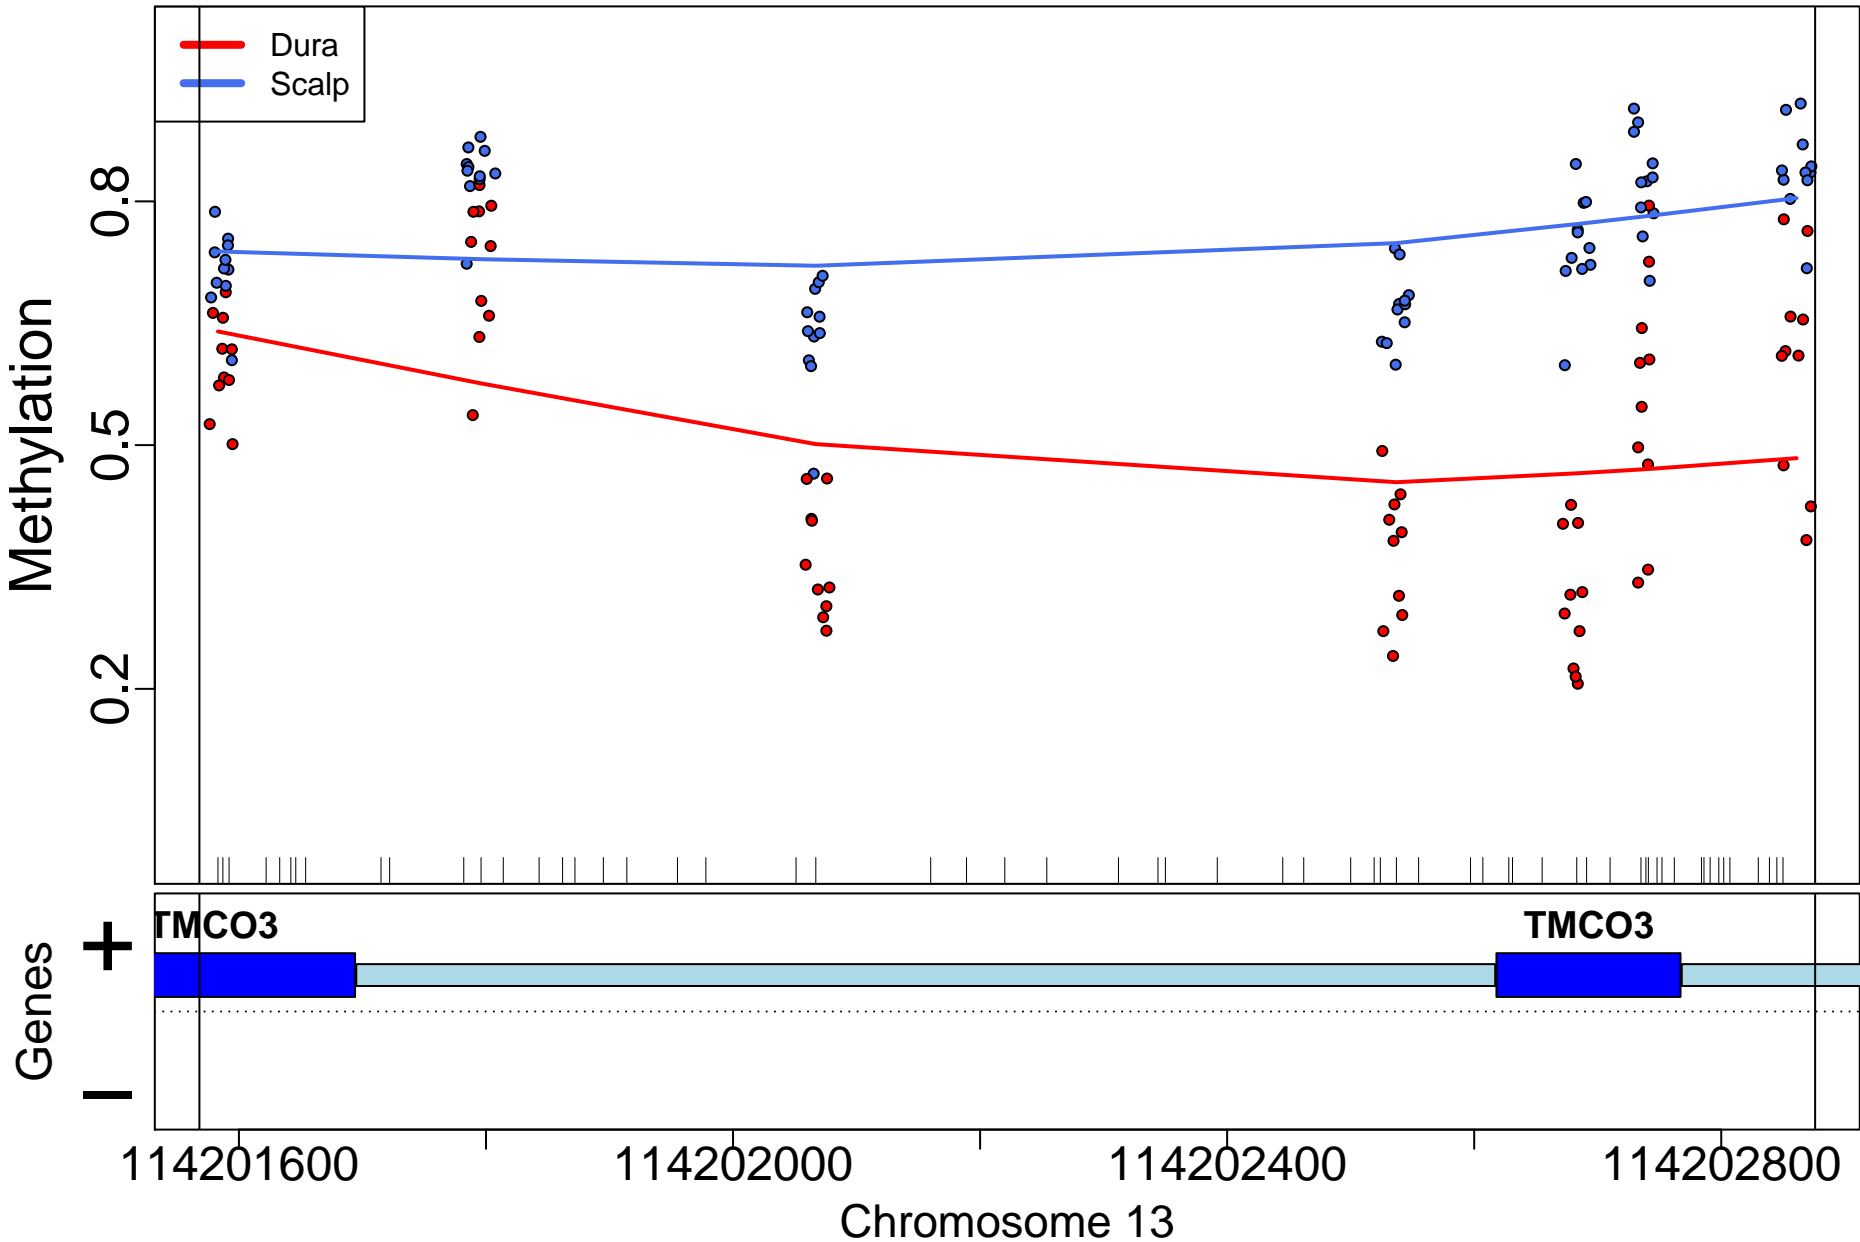

C10orf11; 31bp from tss:promoter

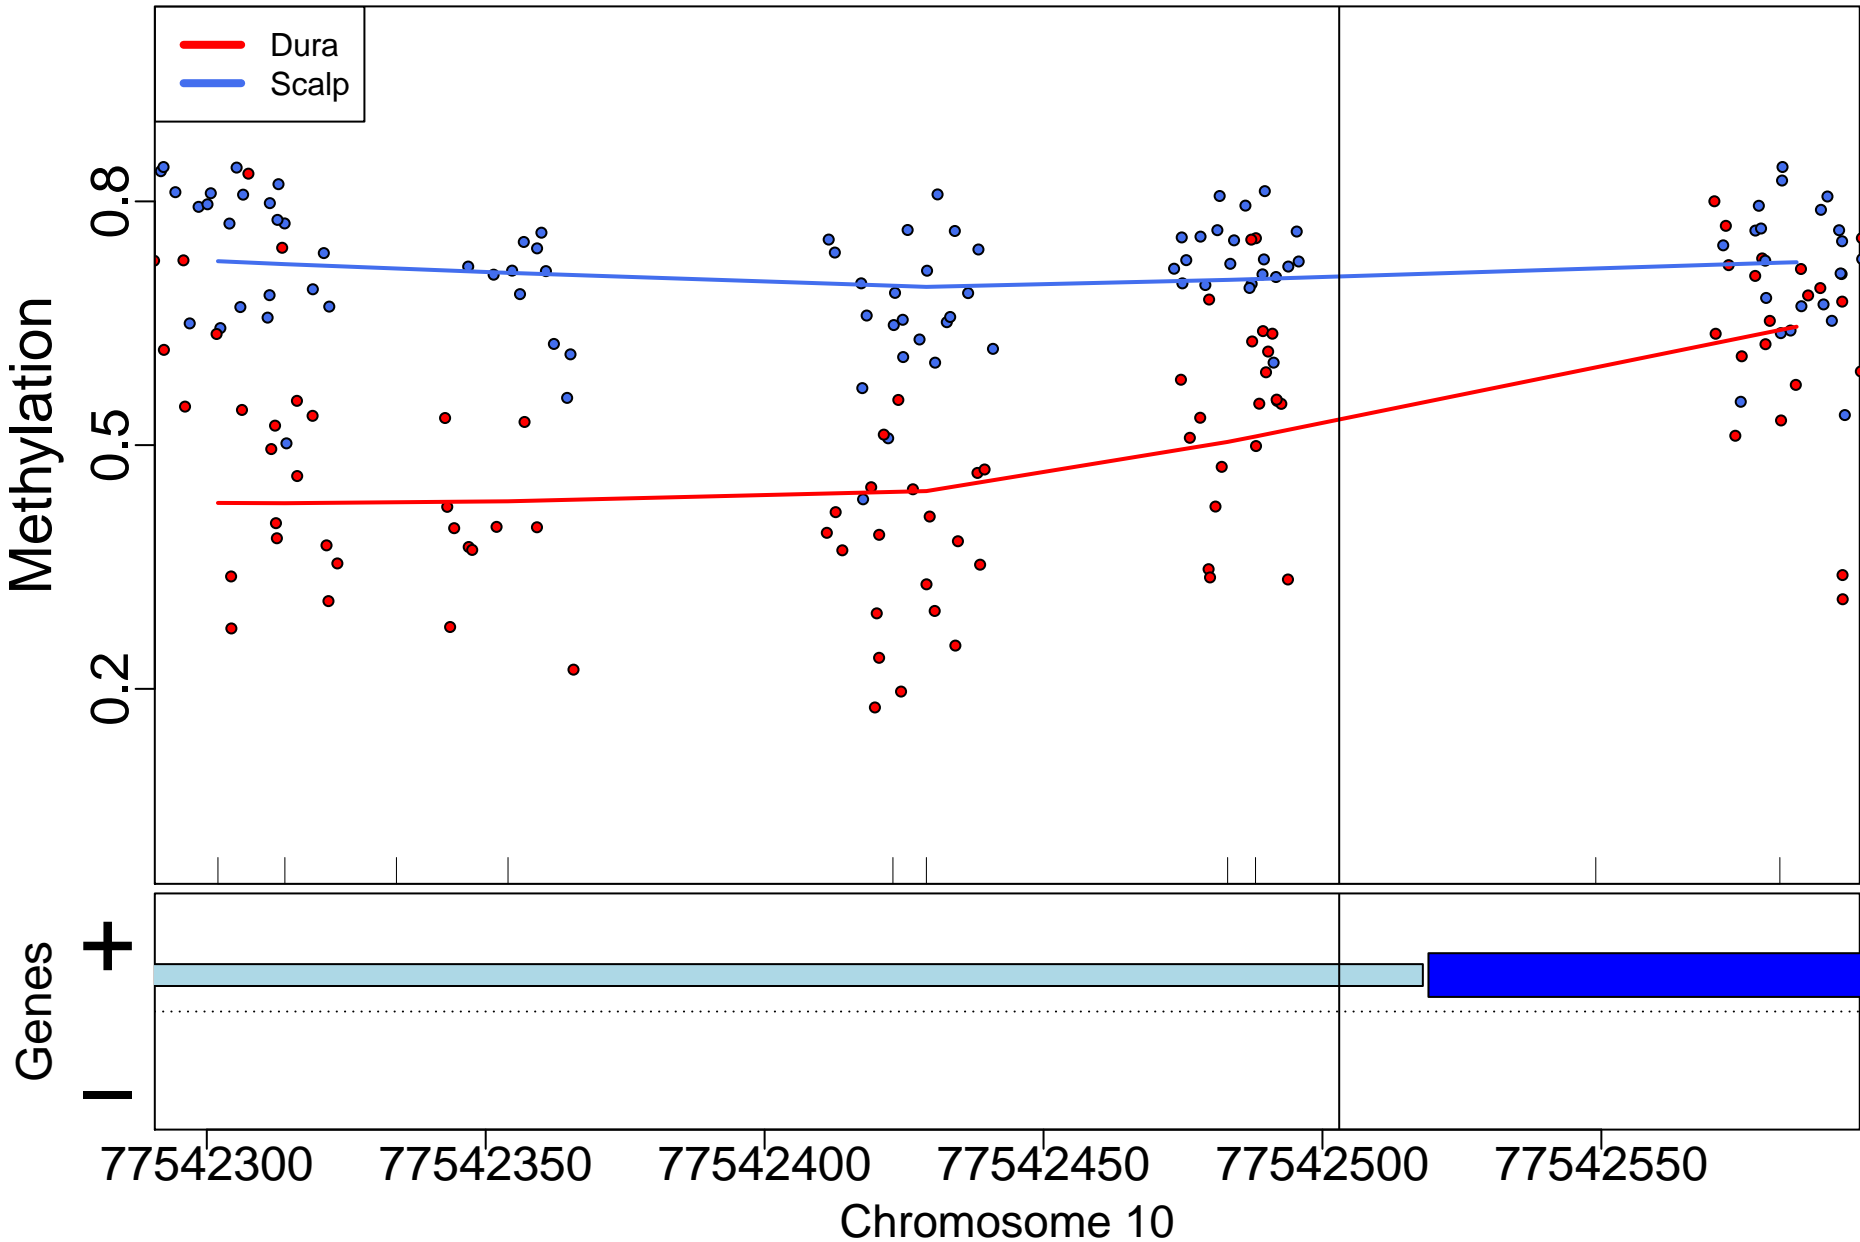

# GFAP; 0bp from tss:NA

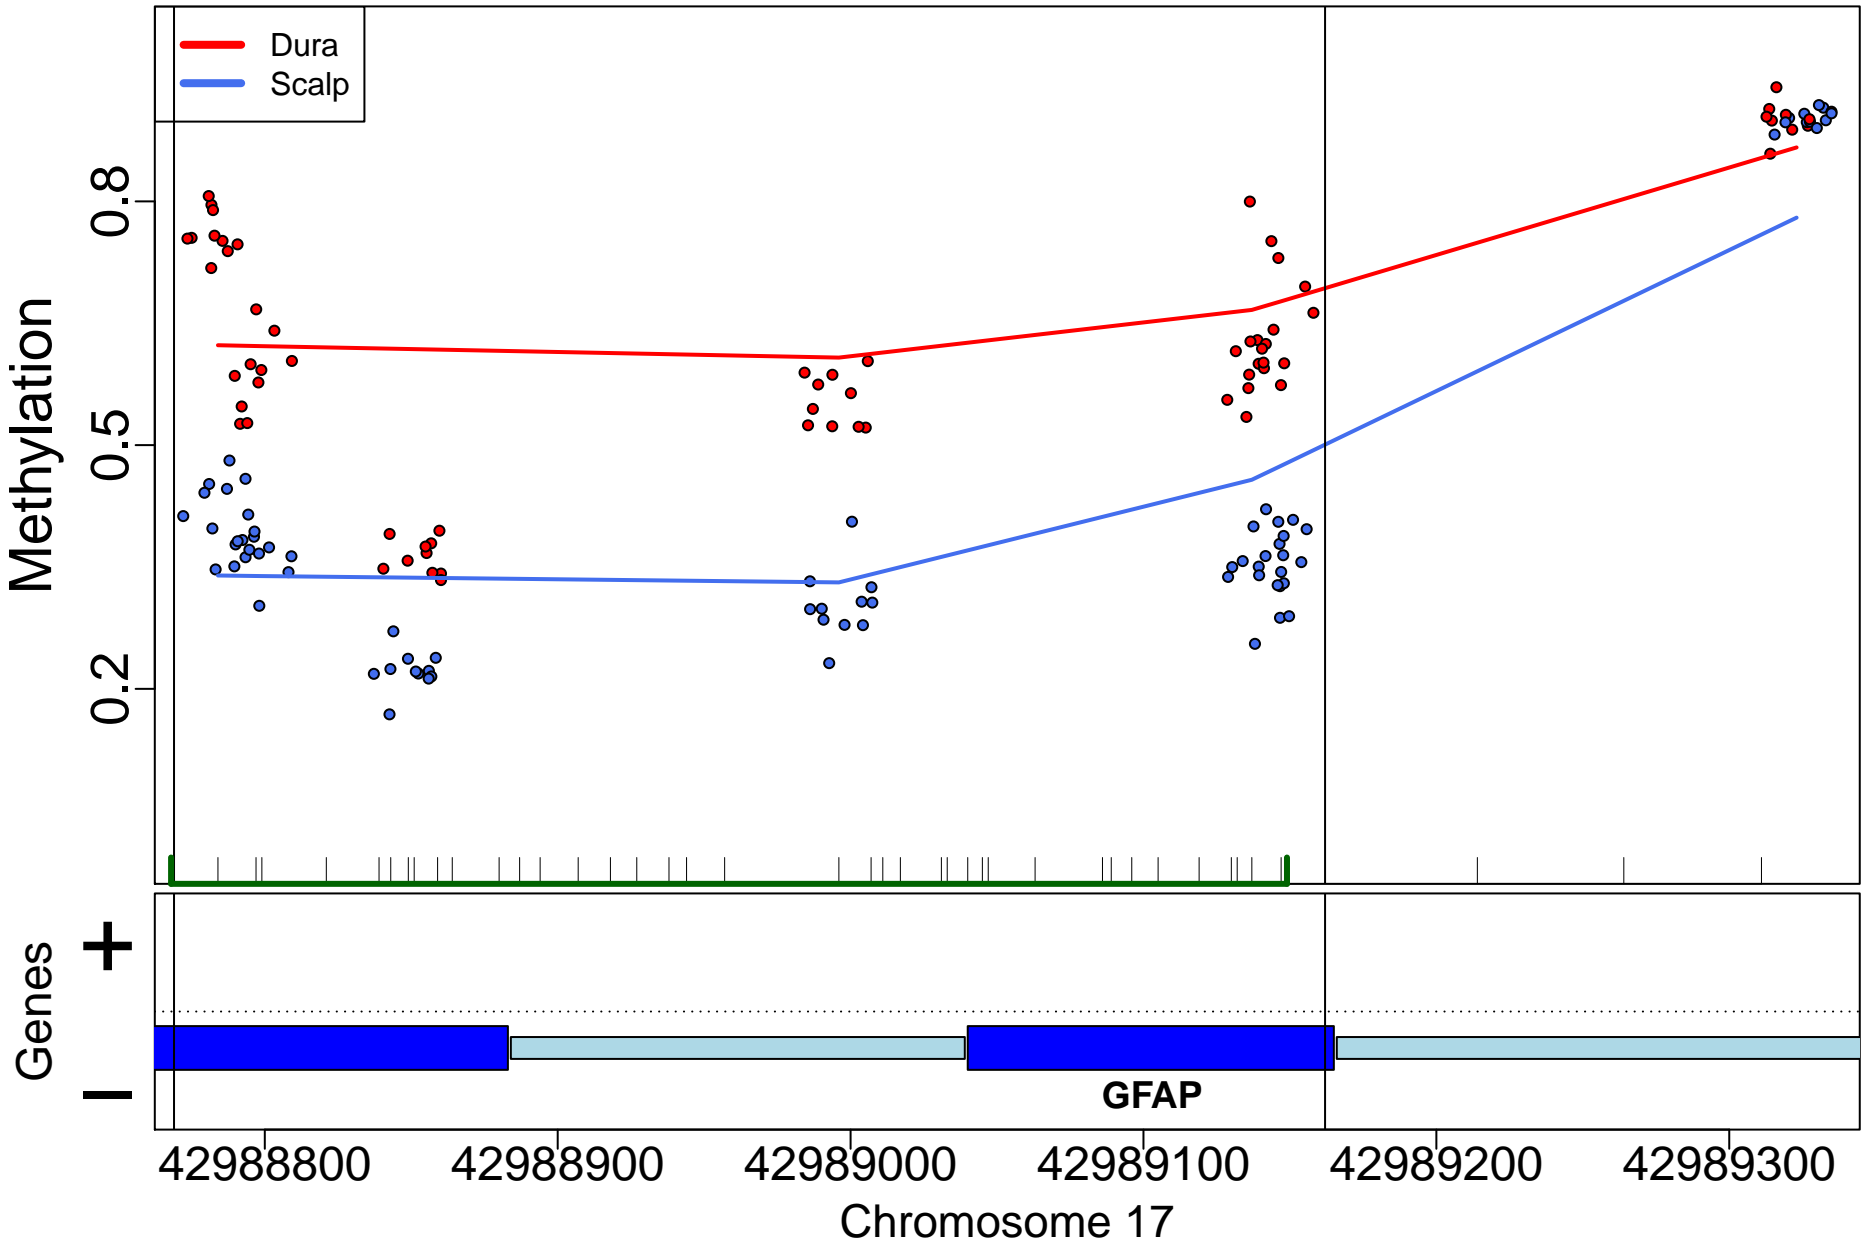

FOXK1; 32572bp from tss:inside intron

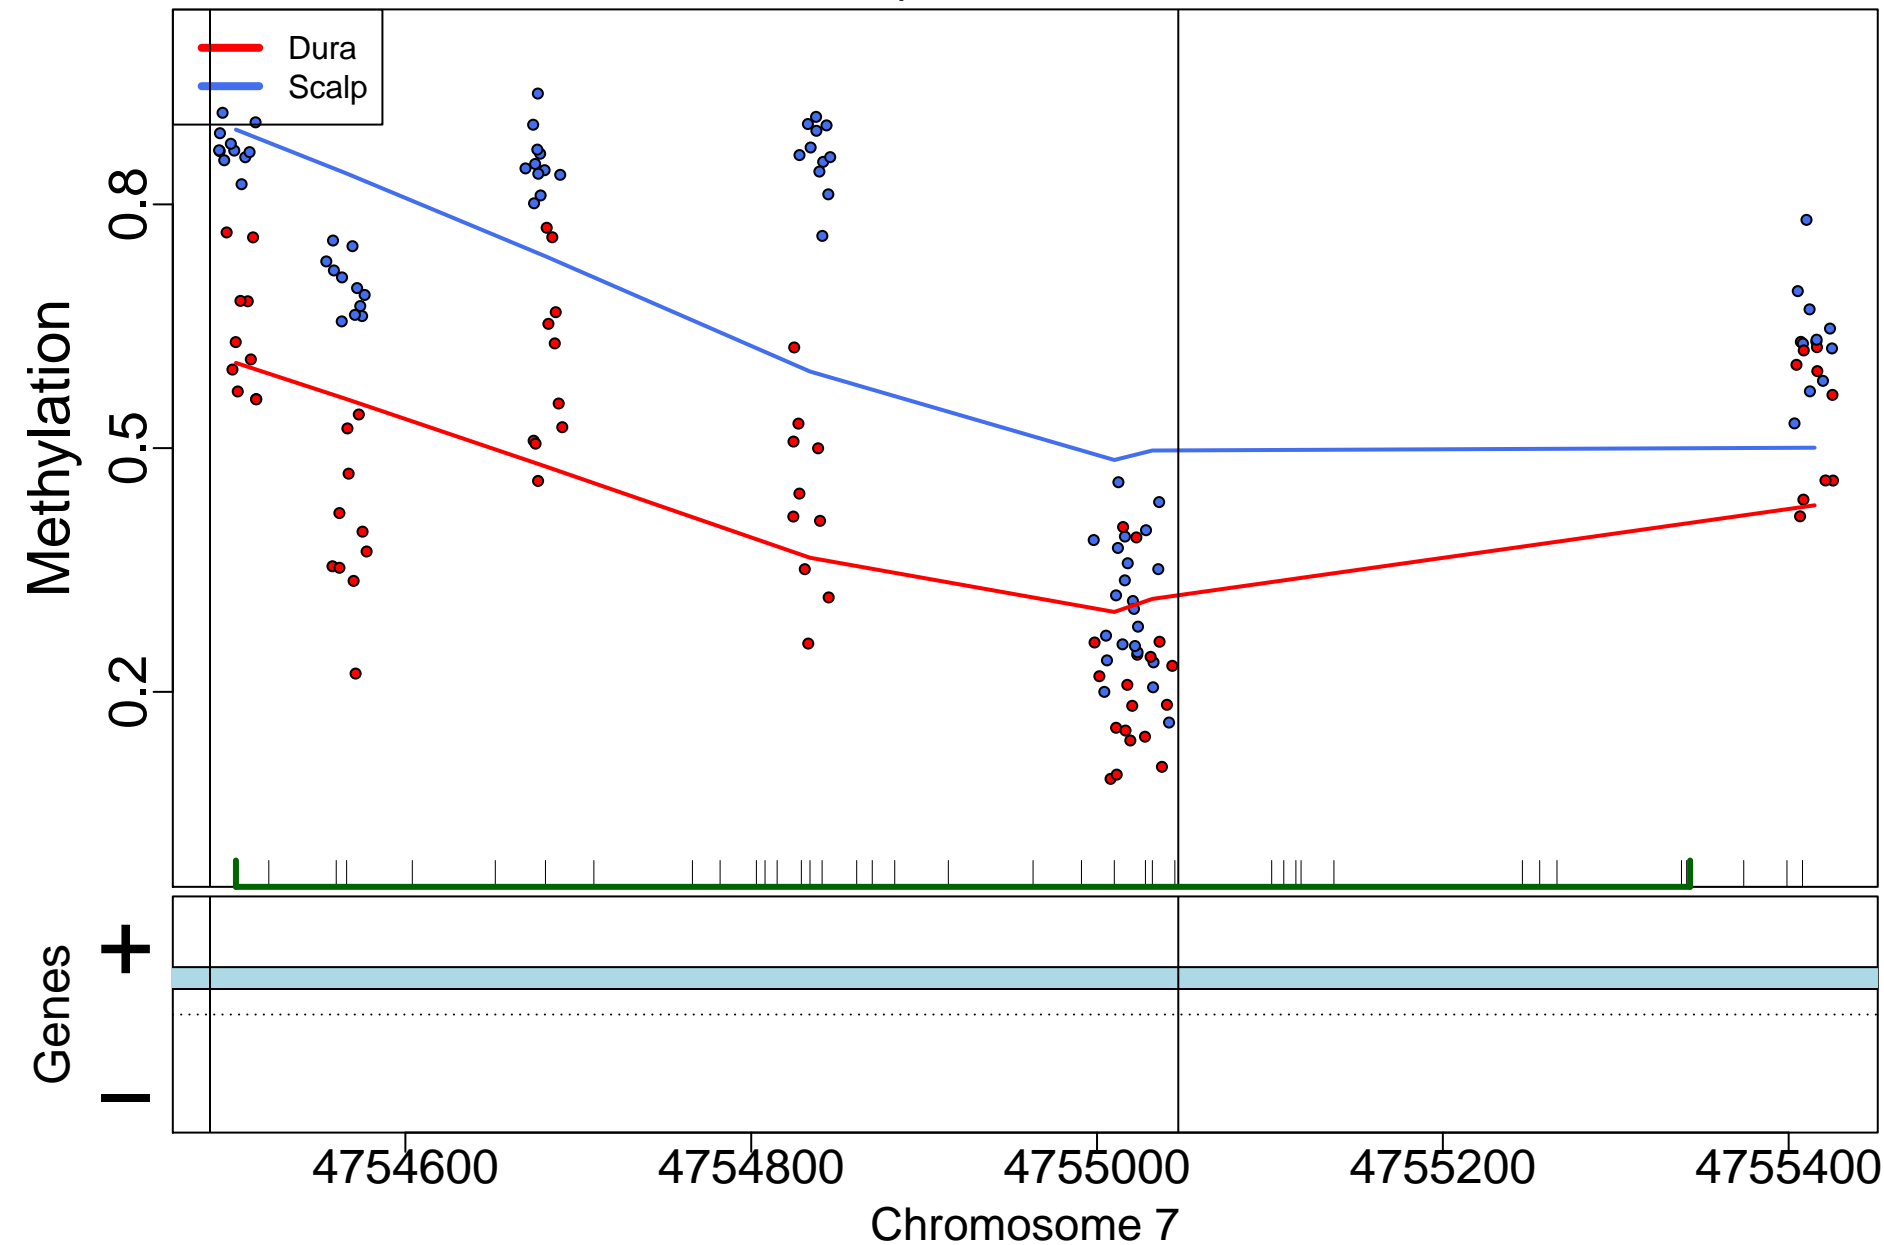

EVX2; 3629bp from tss:upstream

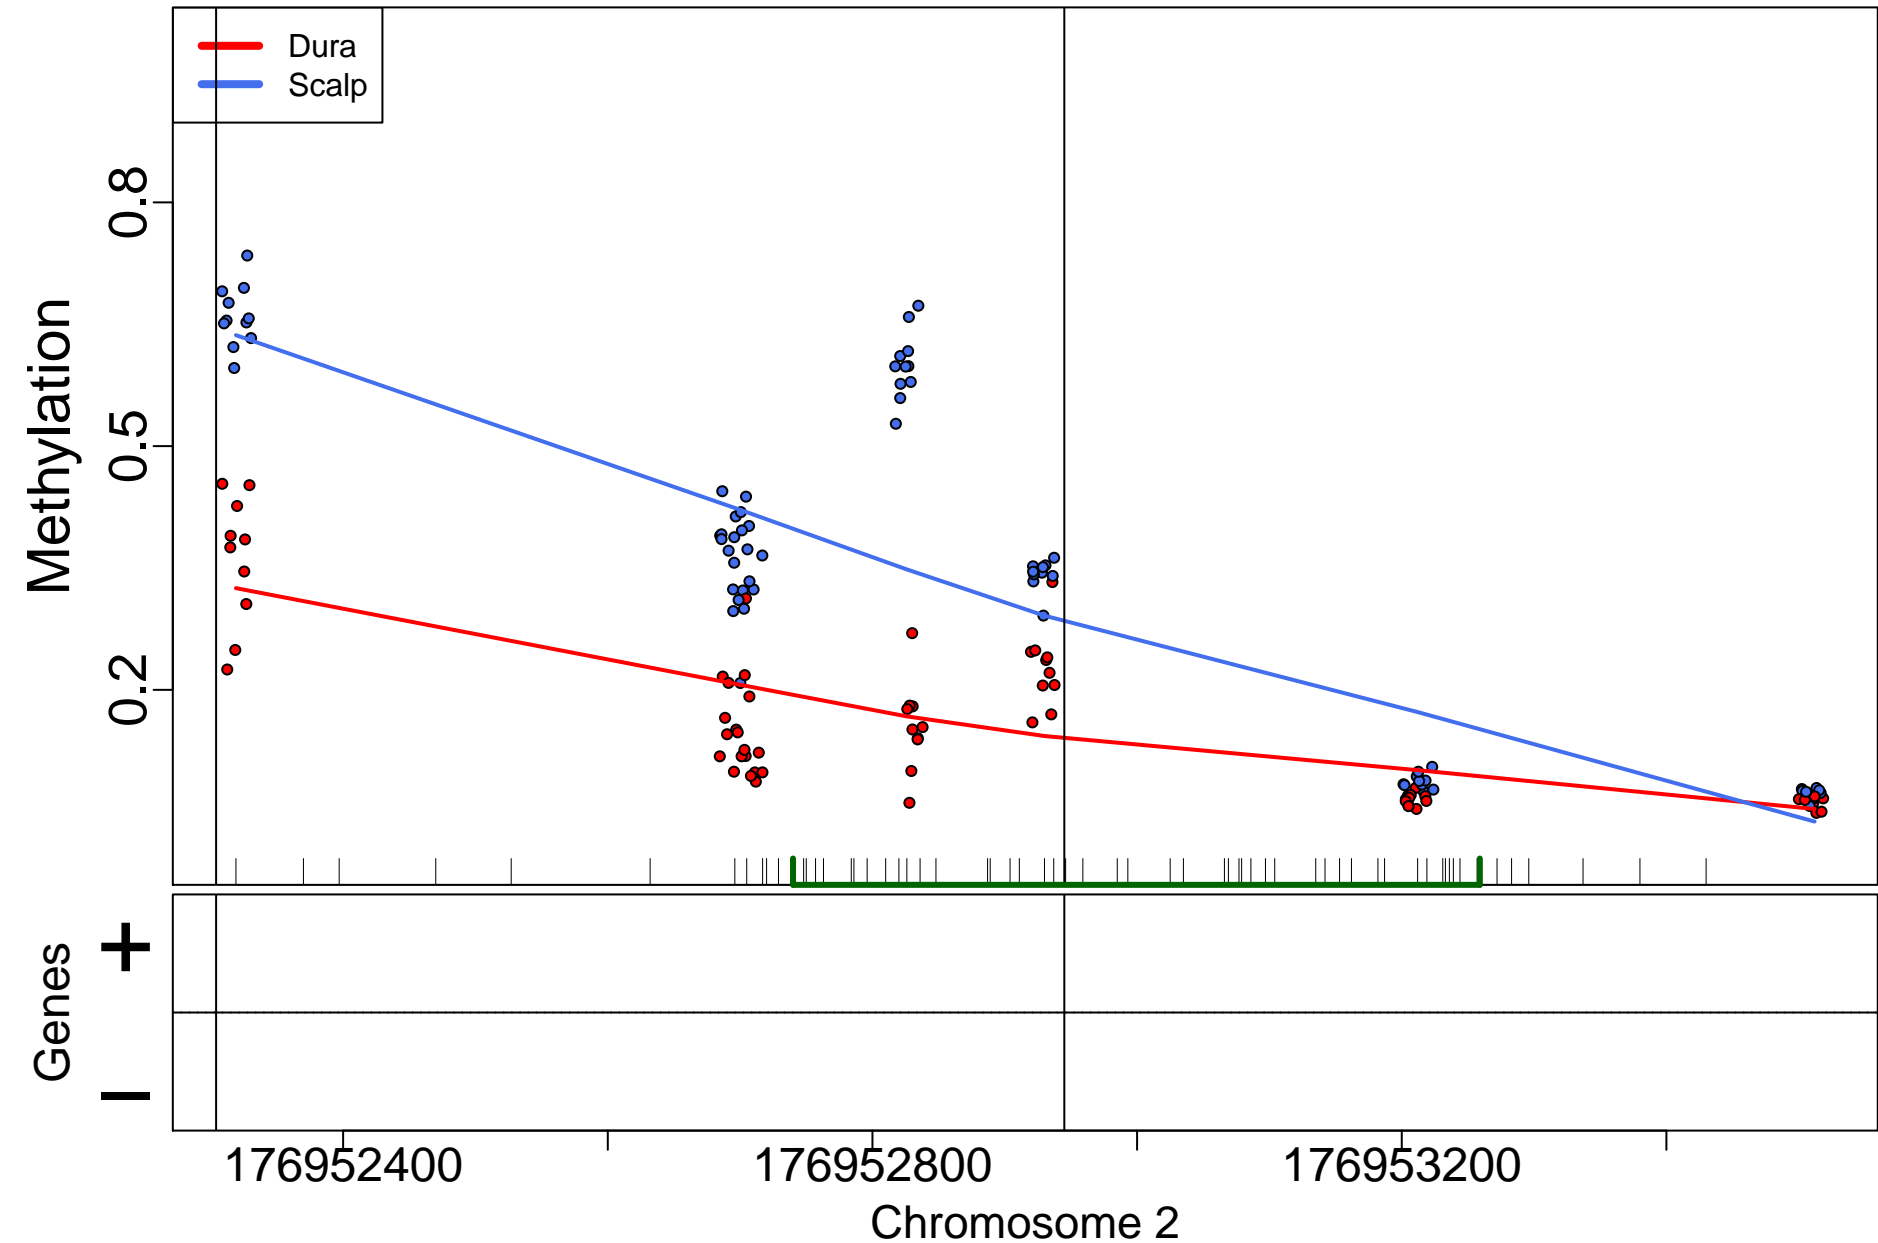

# NXPH2; 790bp from tss:promoter

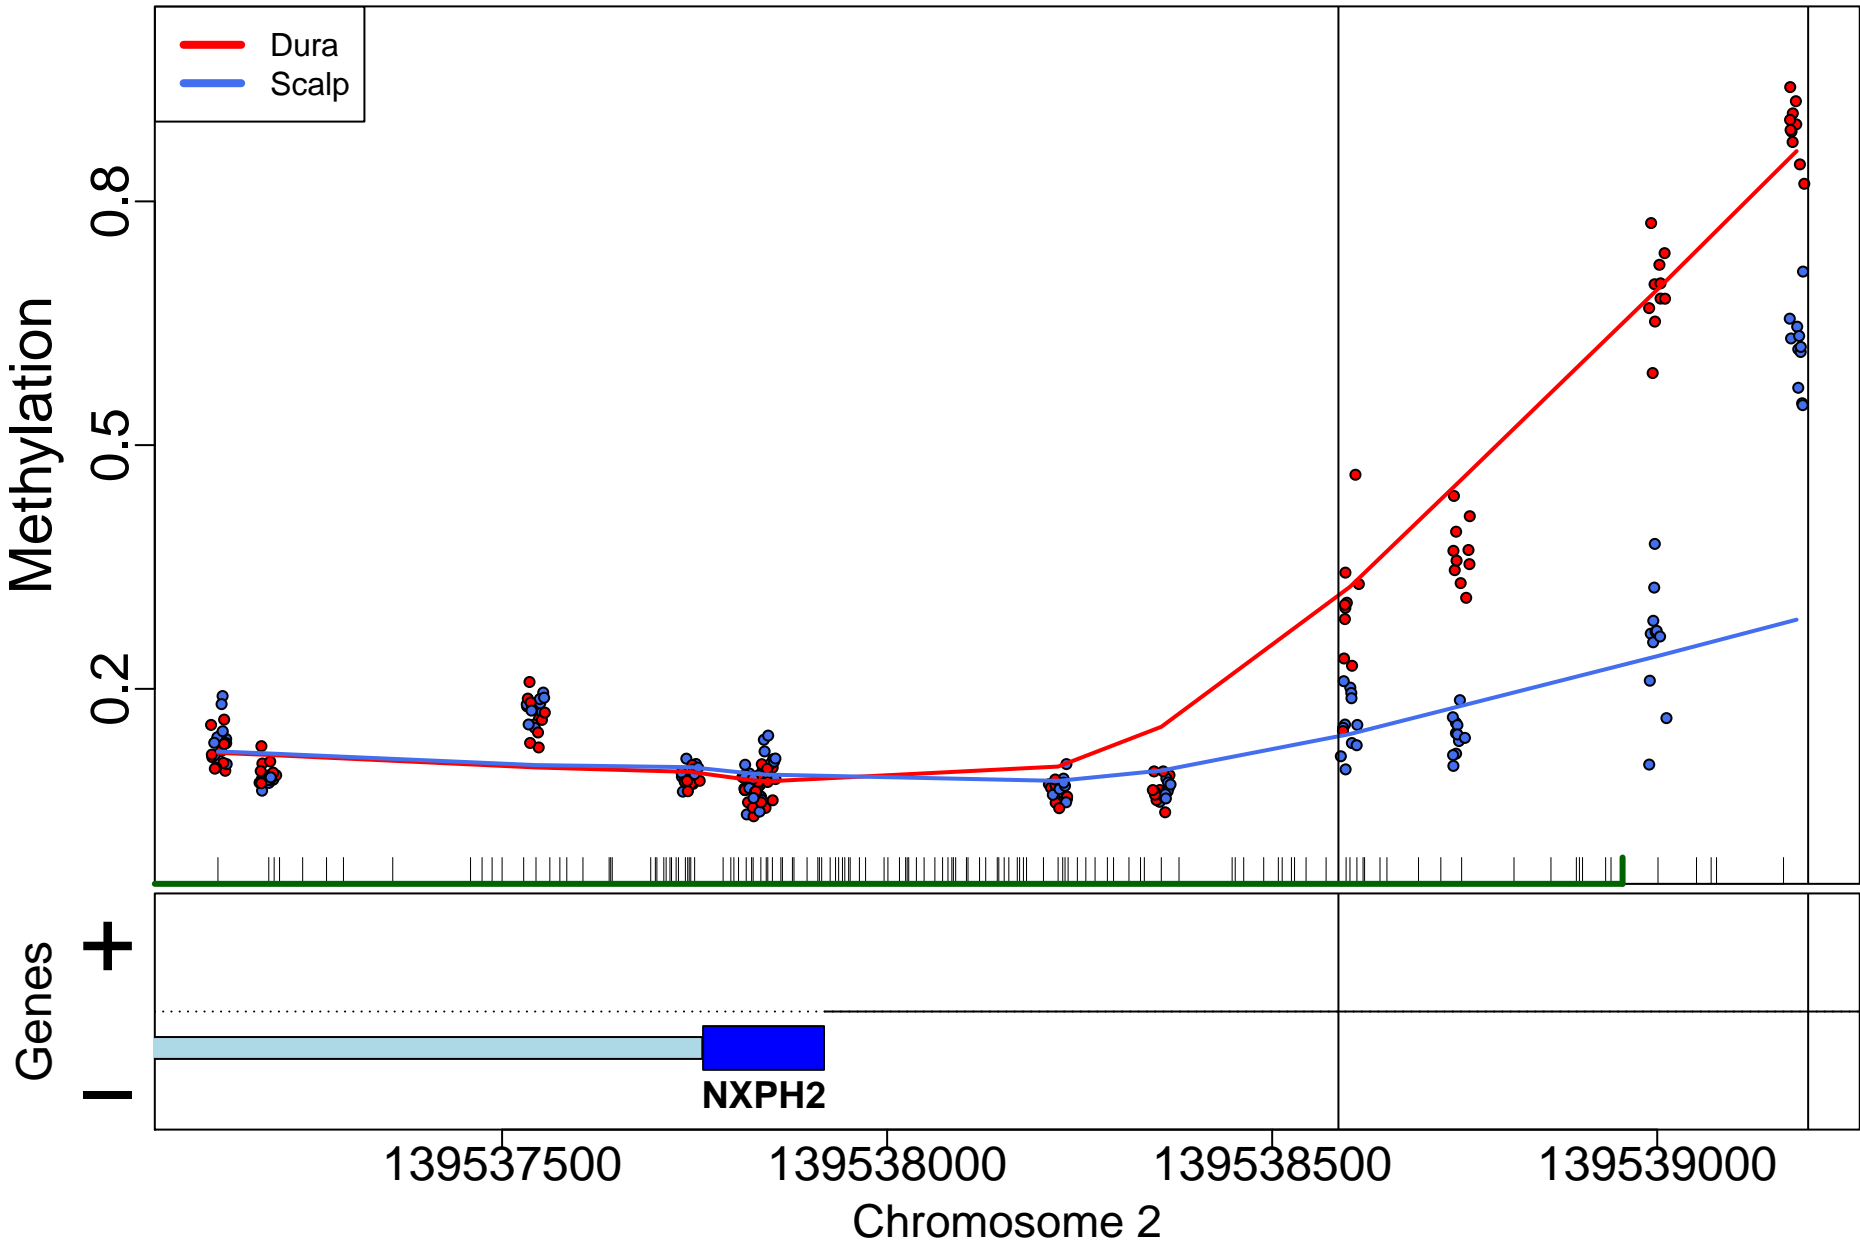

## NR2E1; 8170bp from tss:inside intron

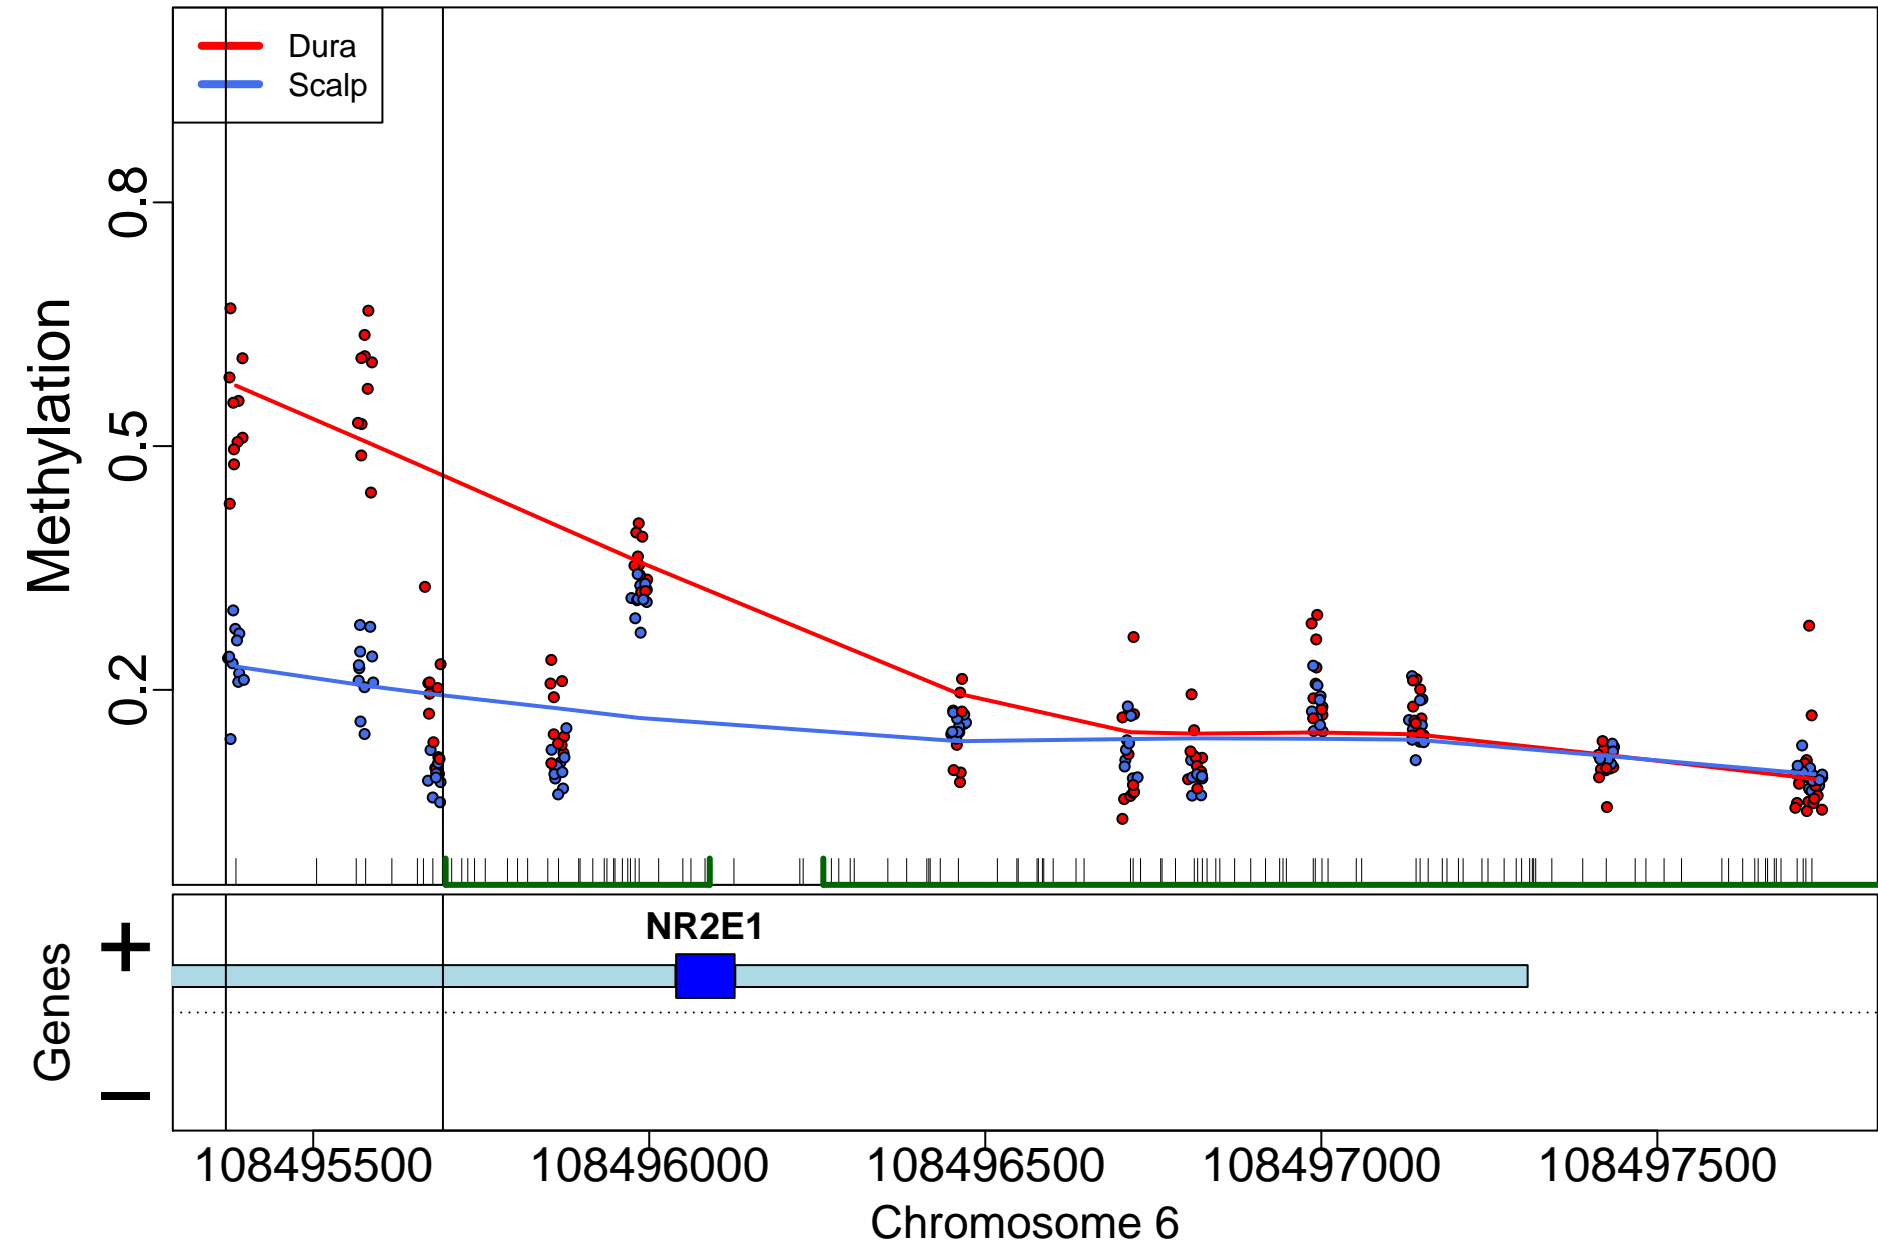



NCR2; 40119bp from tss:downstream

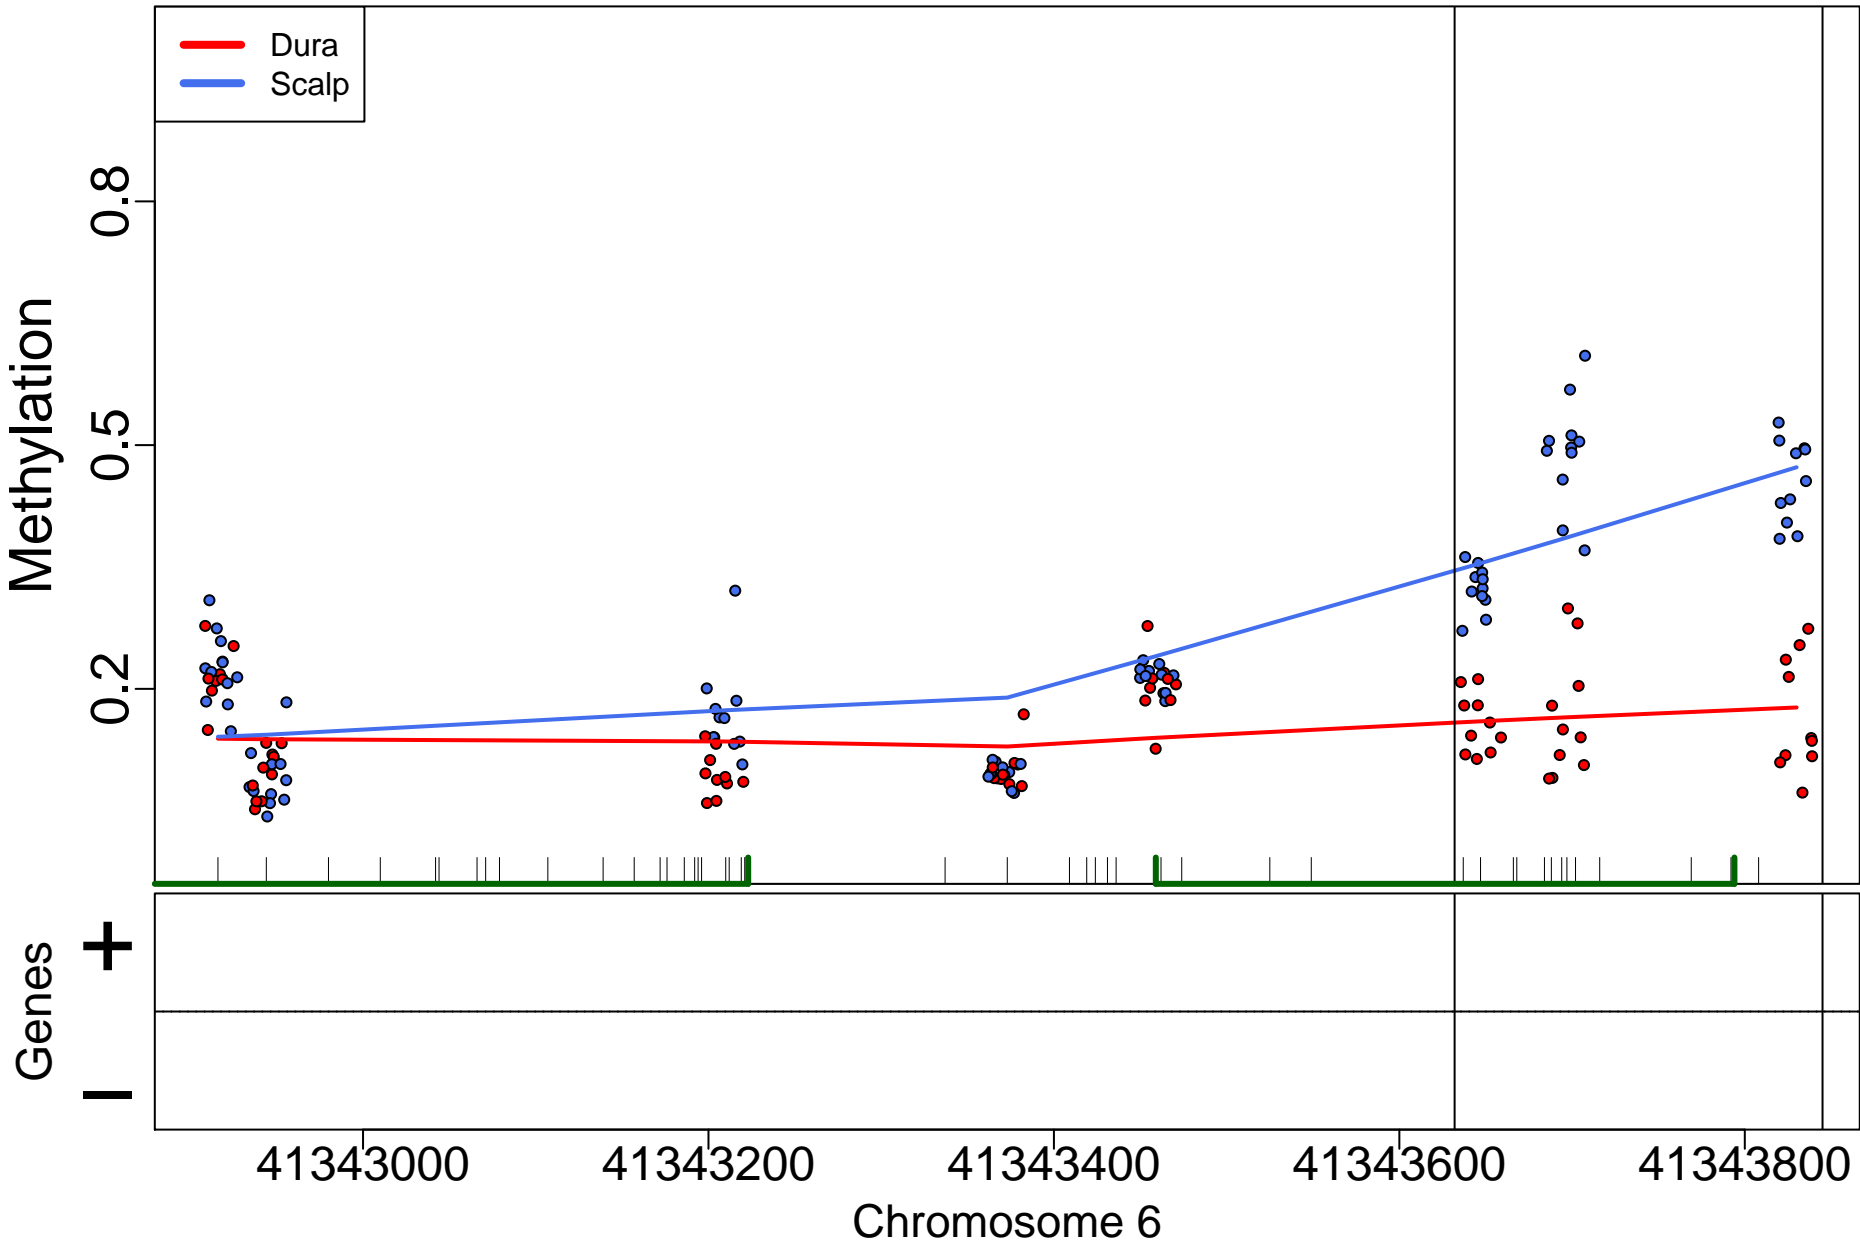

DCAF4; 614bp from tss:promoter

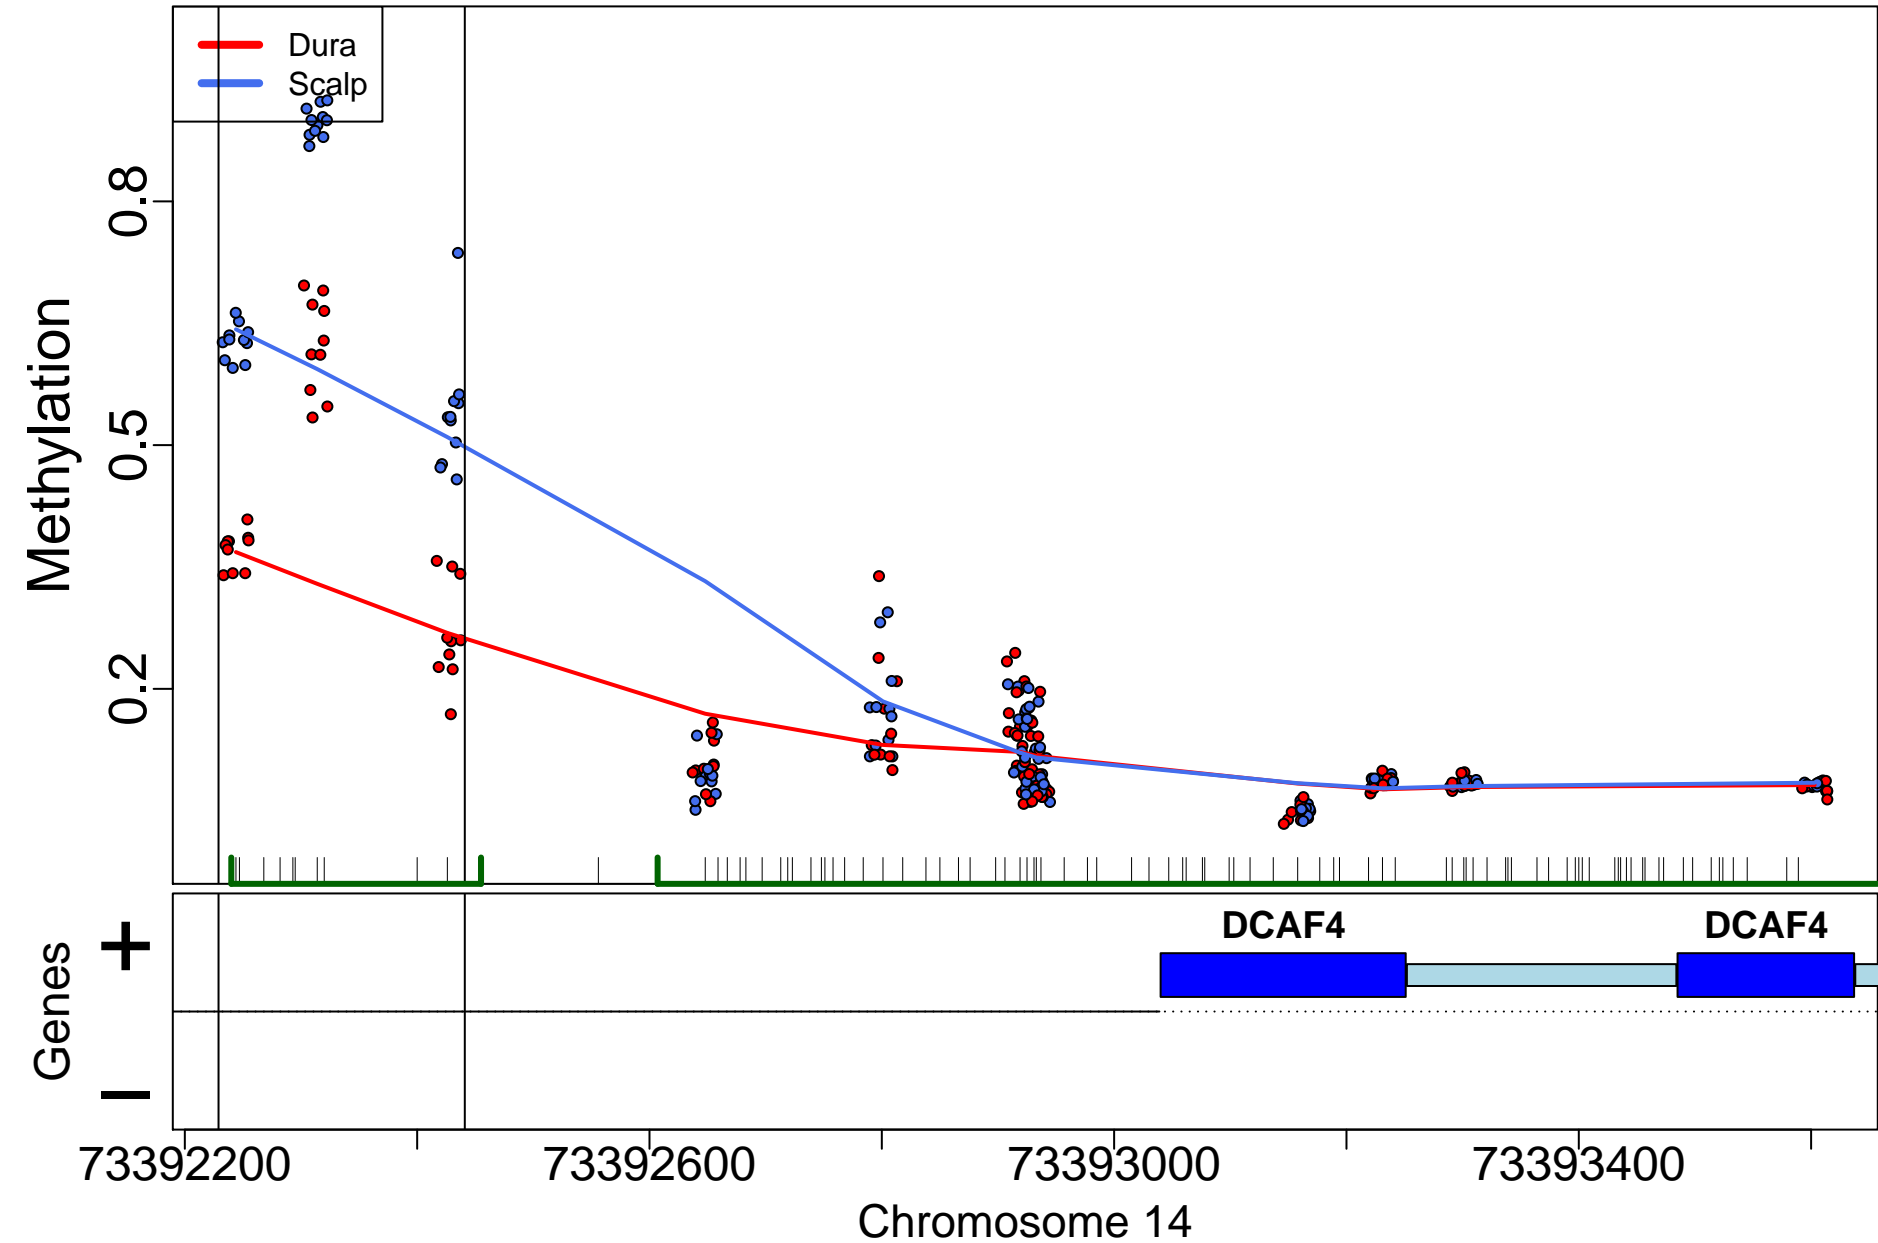

POU3F3; 7418bp from tss:downstream

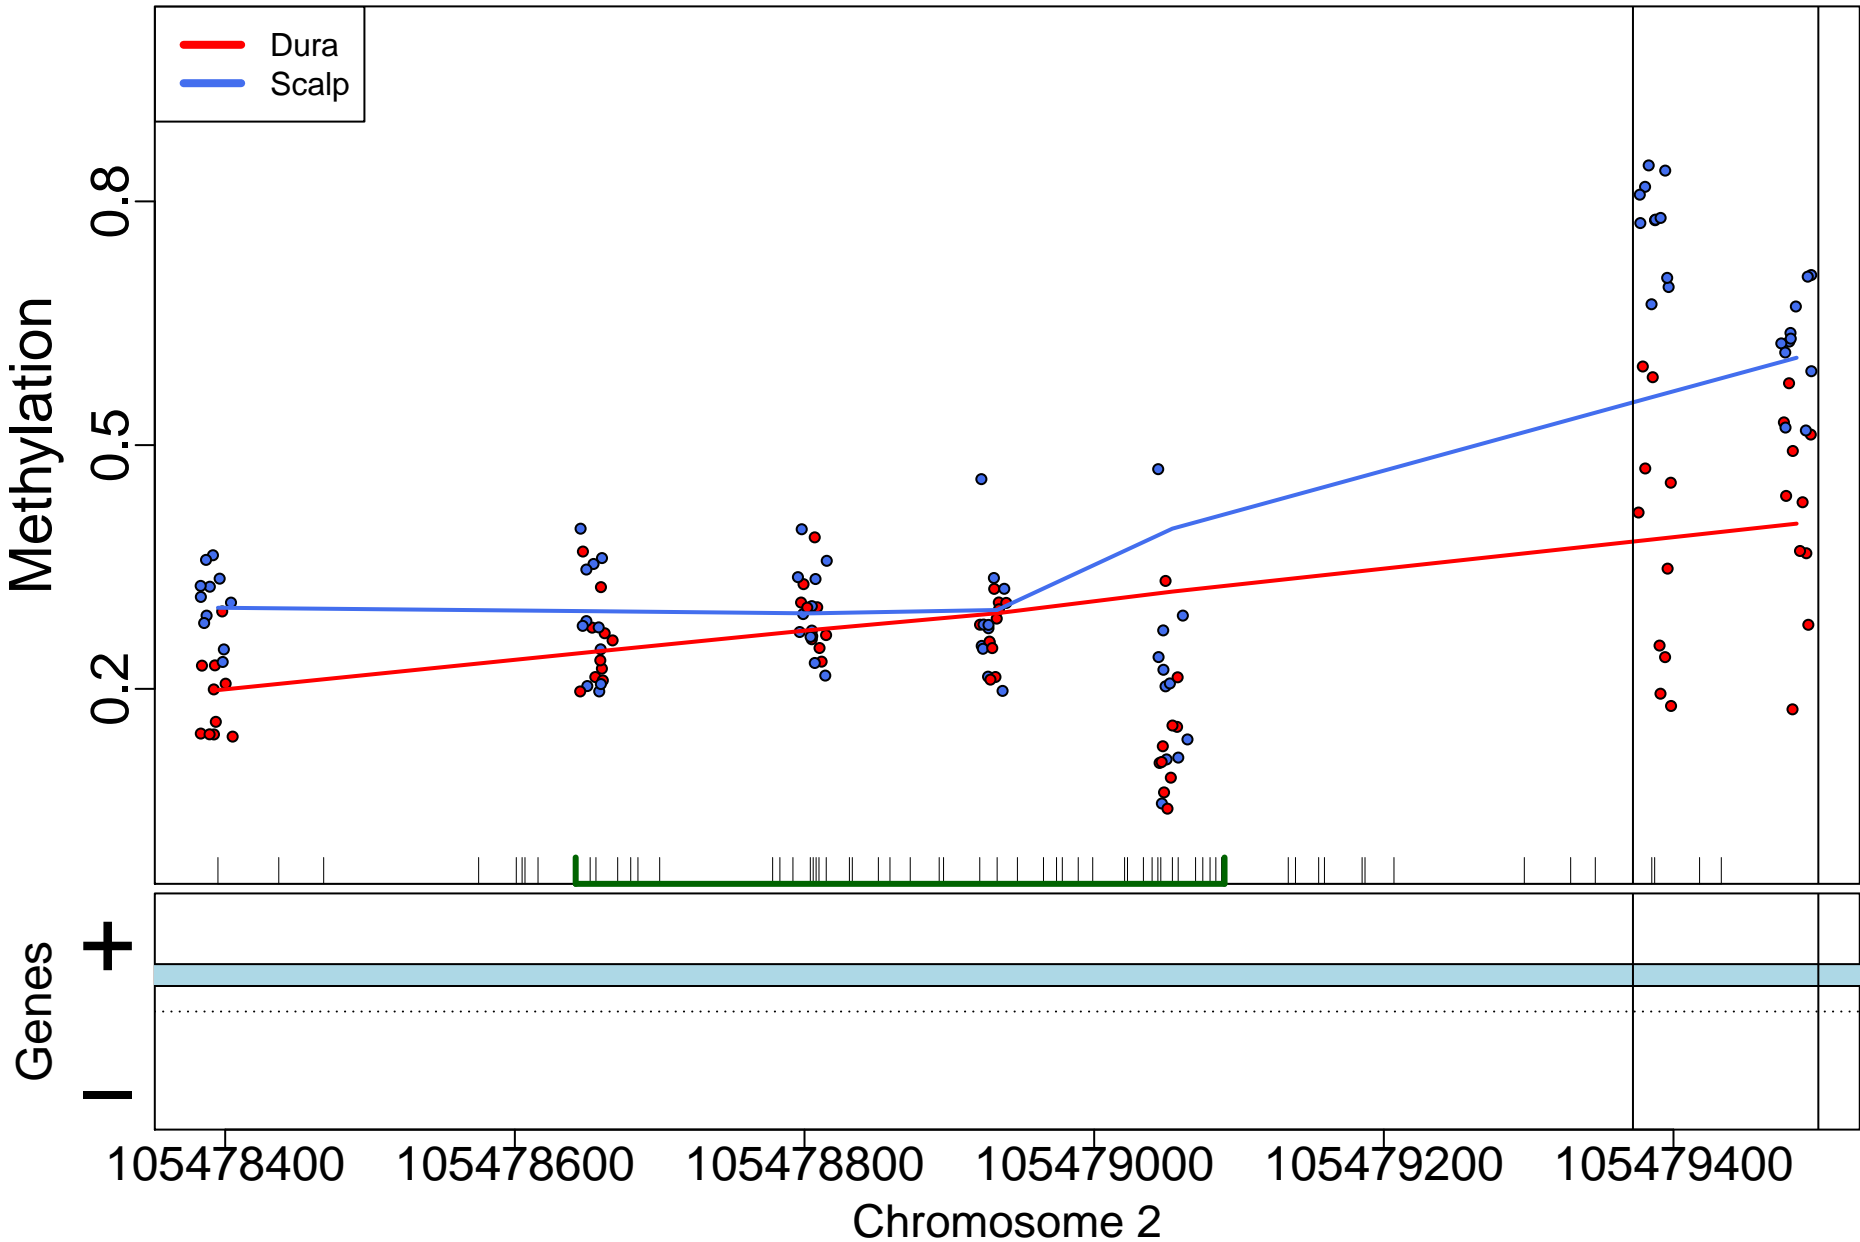

PPP1CC; 1310bp from tss:promoter

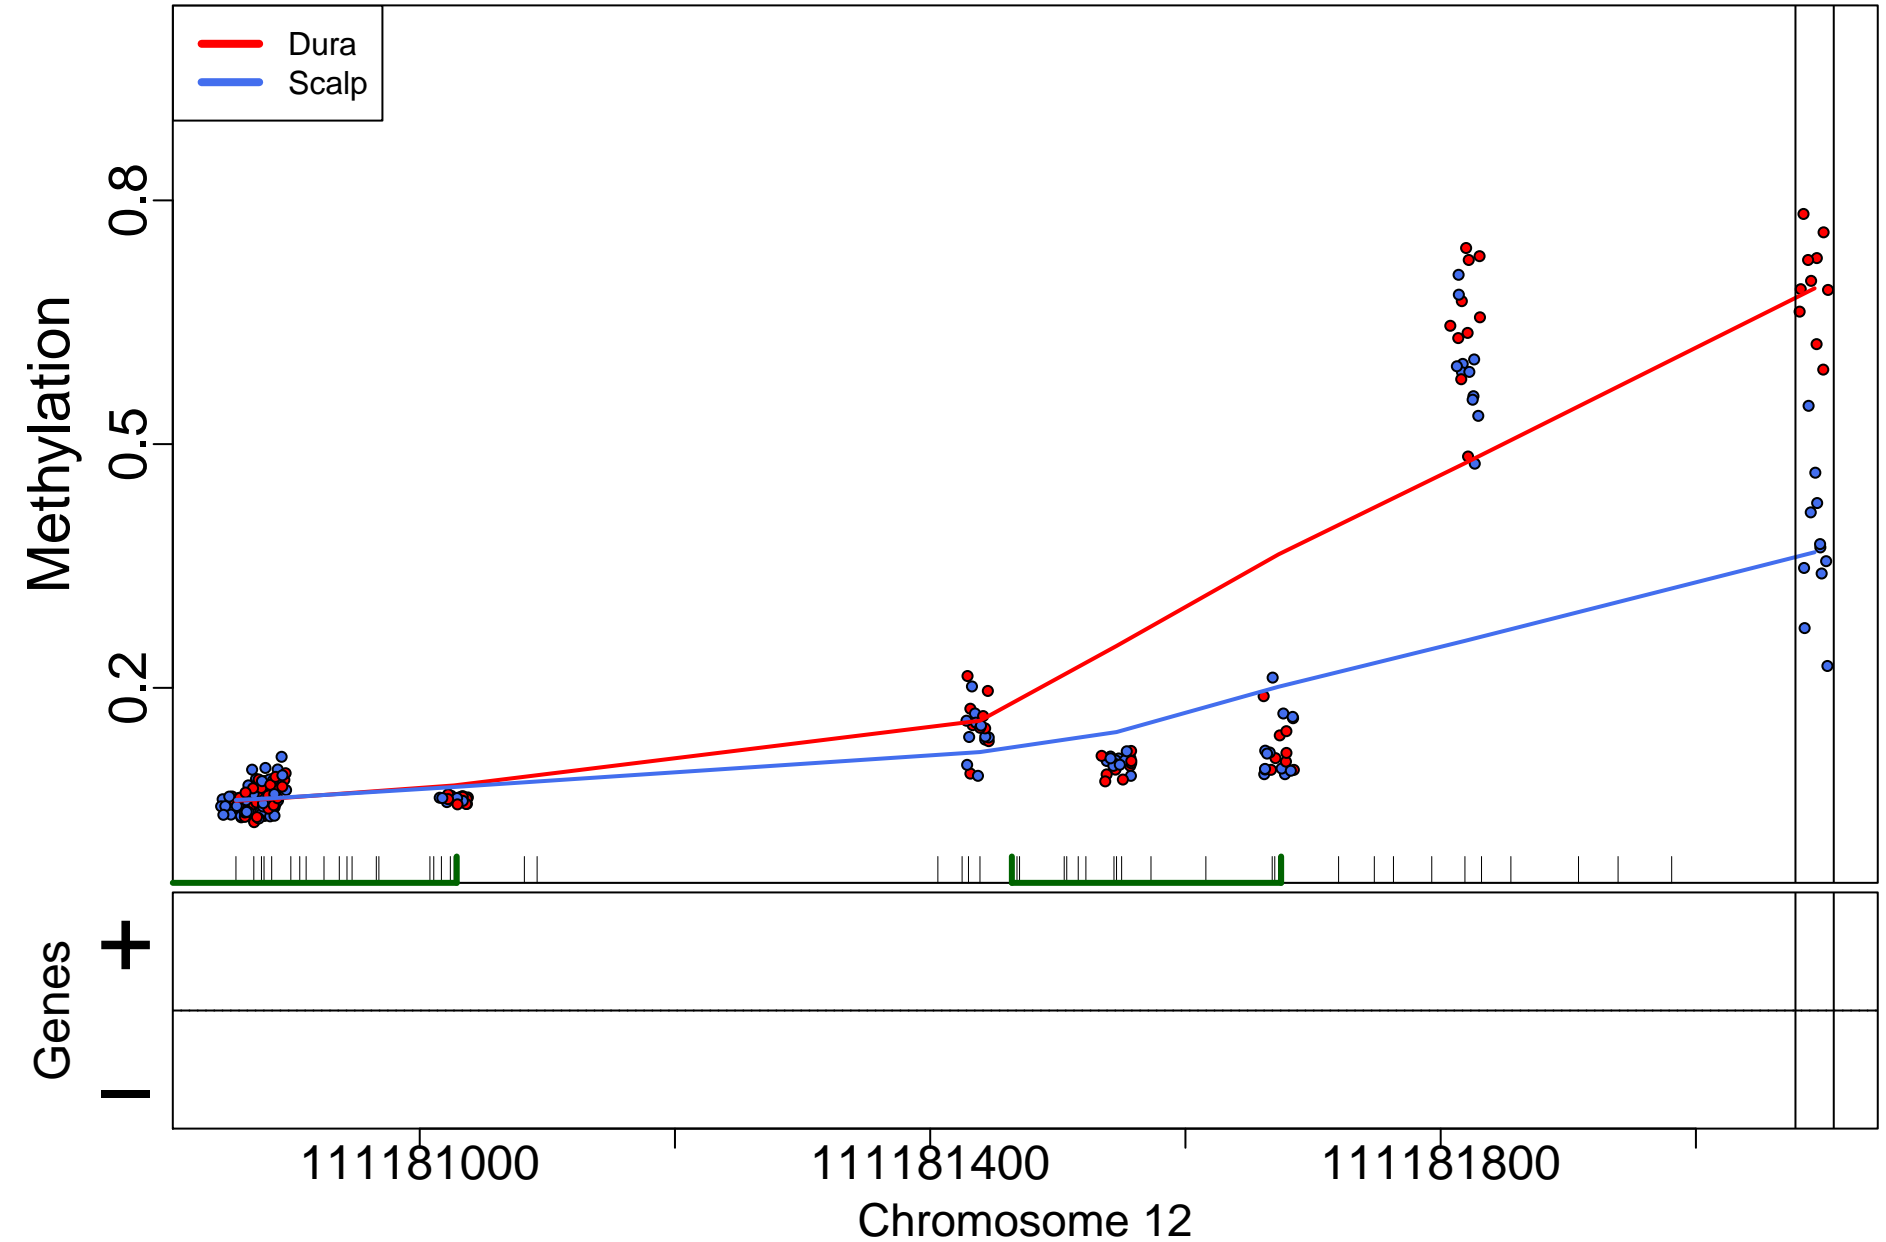

DLX5; 405bp from tss:promoter

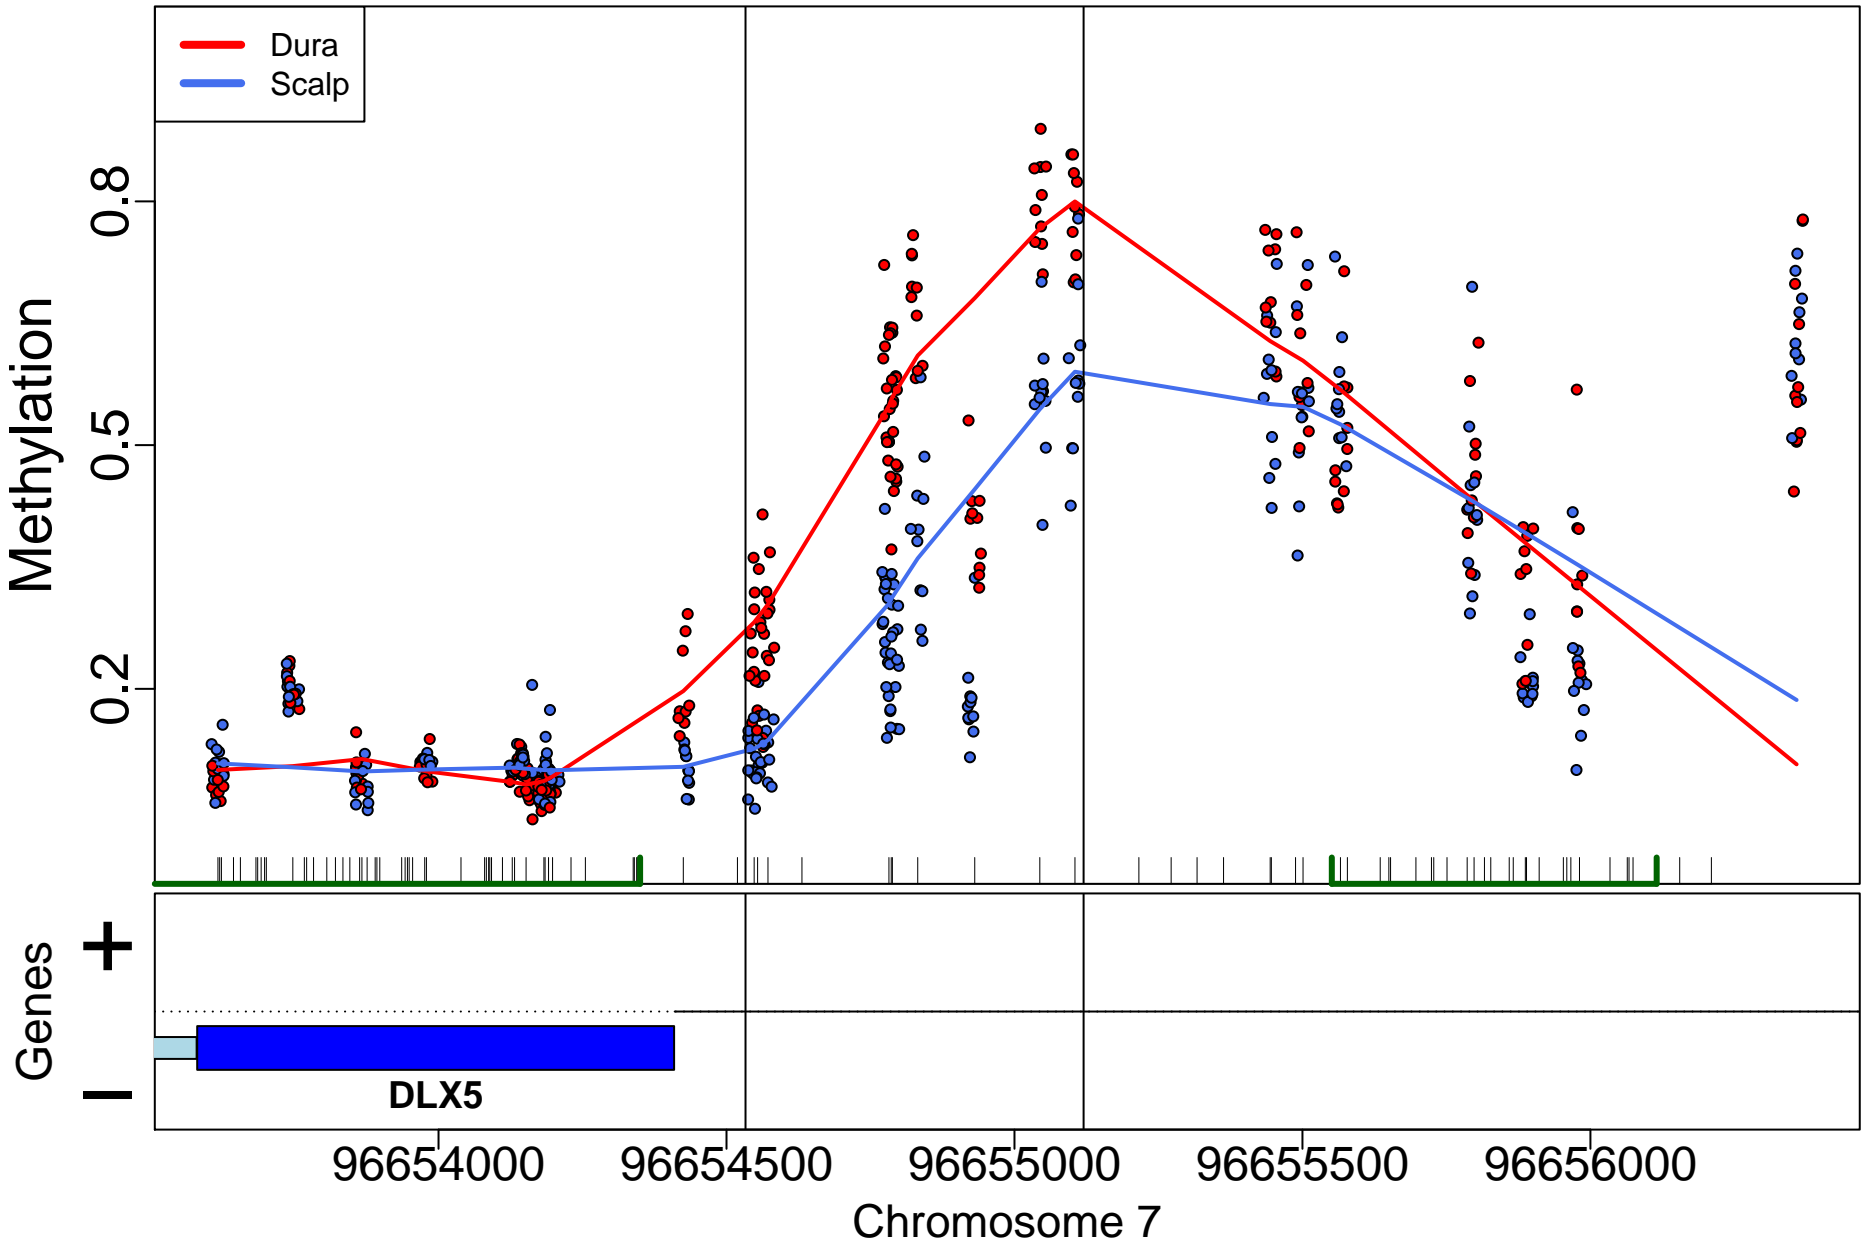

SATB2; 14641bp from tss:covers exon(s)

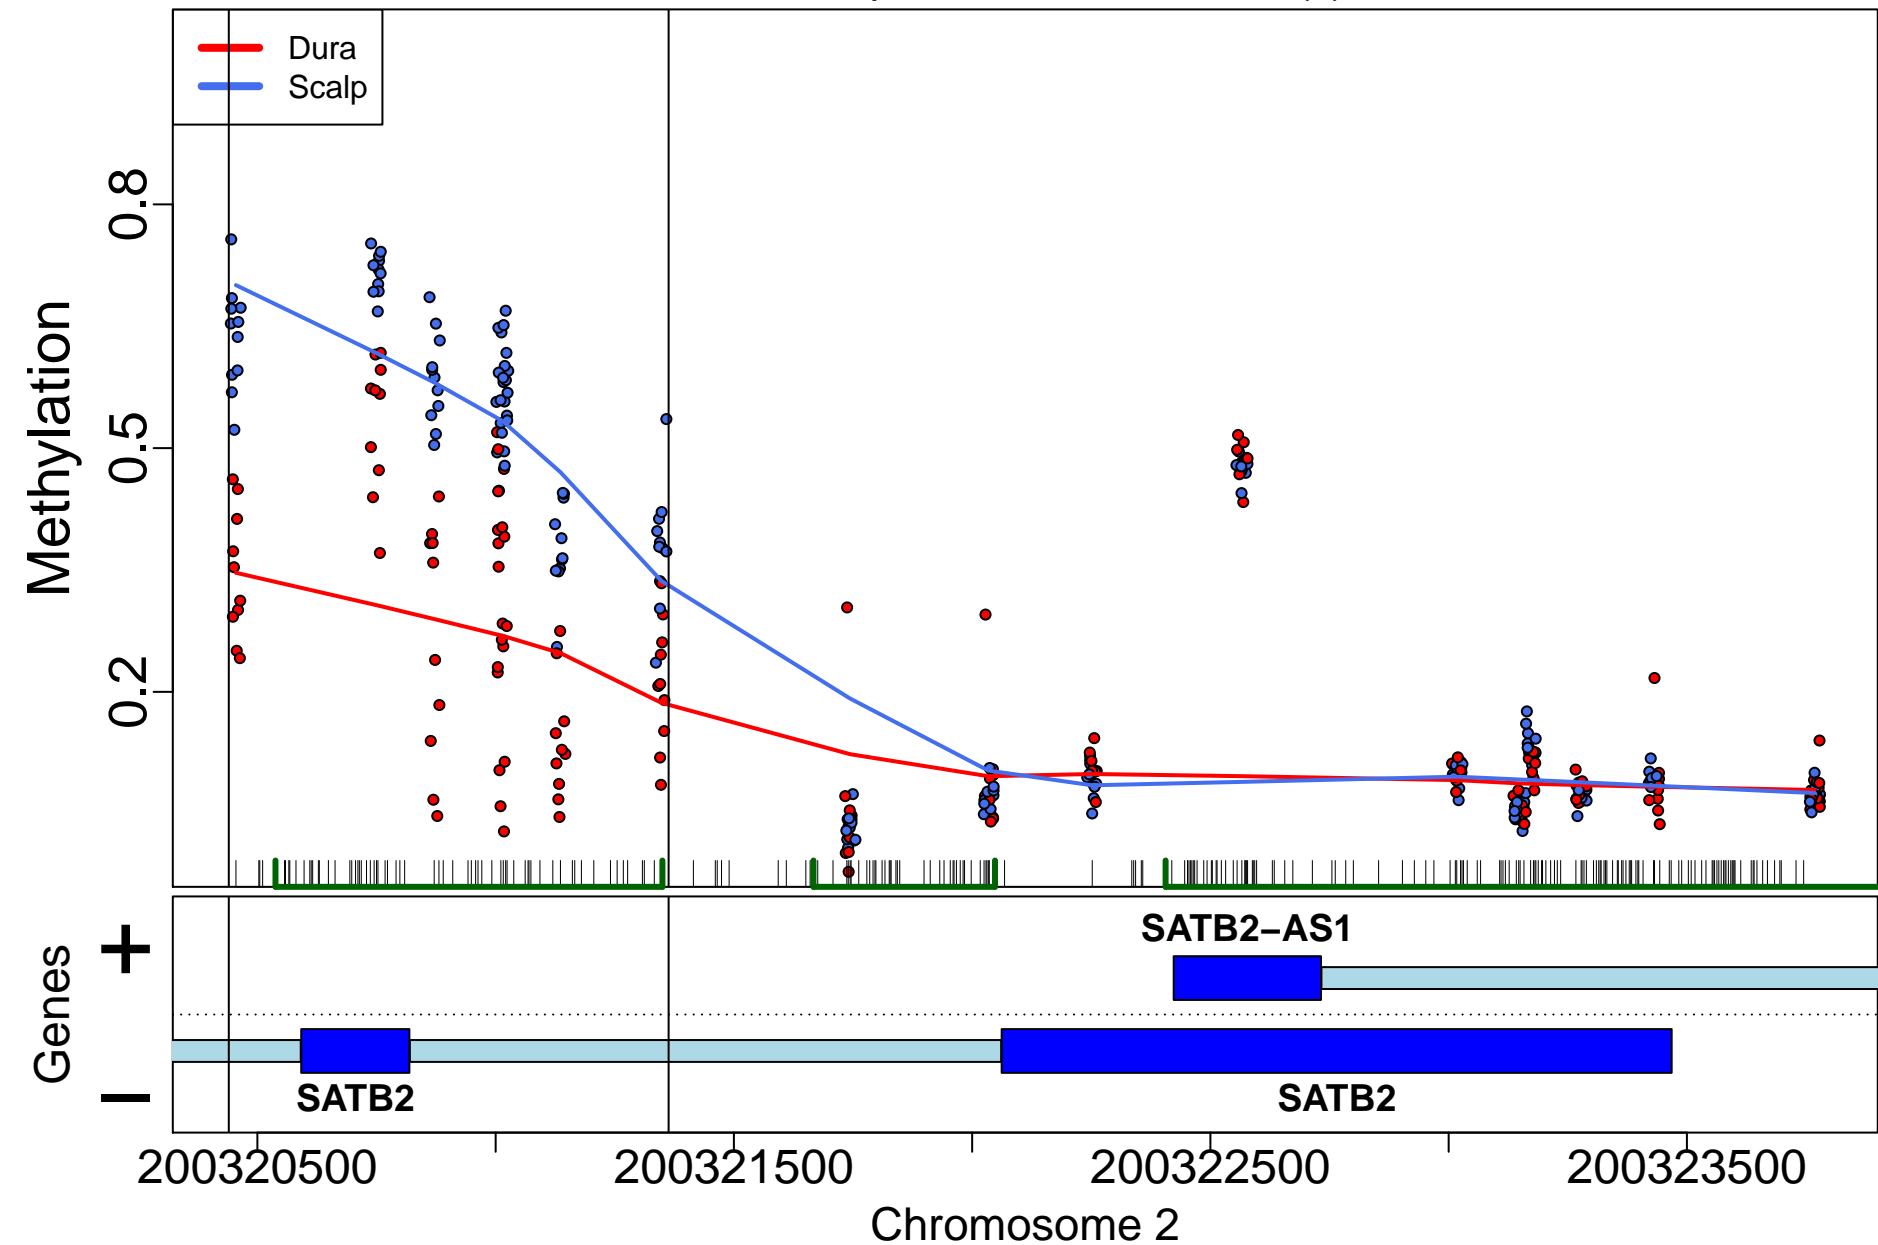

MAFB; 1359bp from tss:promoter

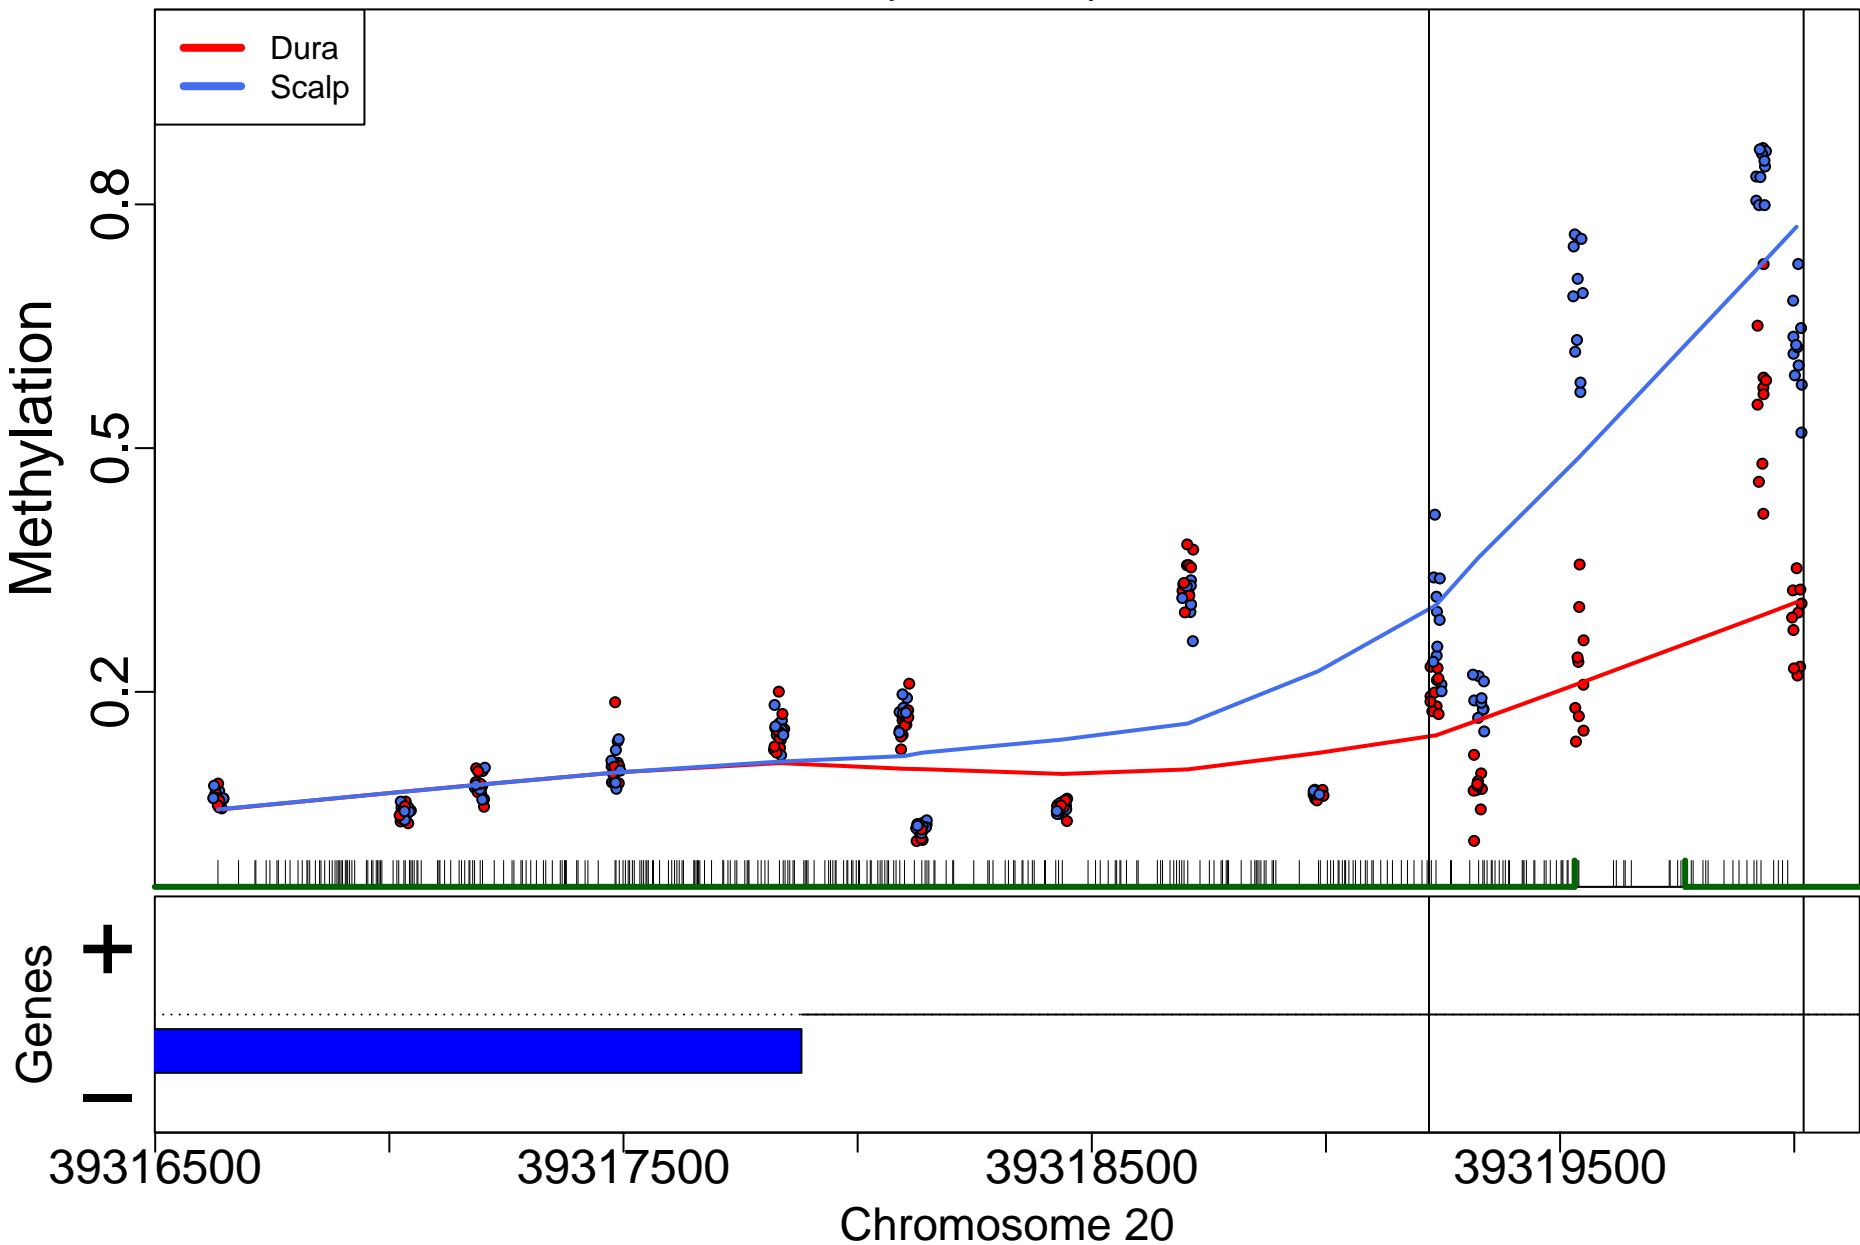

LOC648987; 0bp from tss:NA

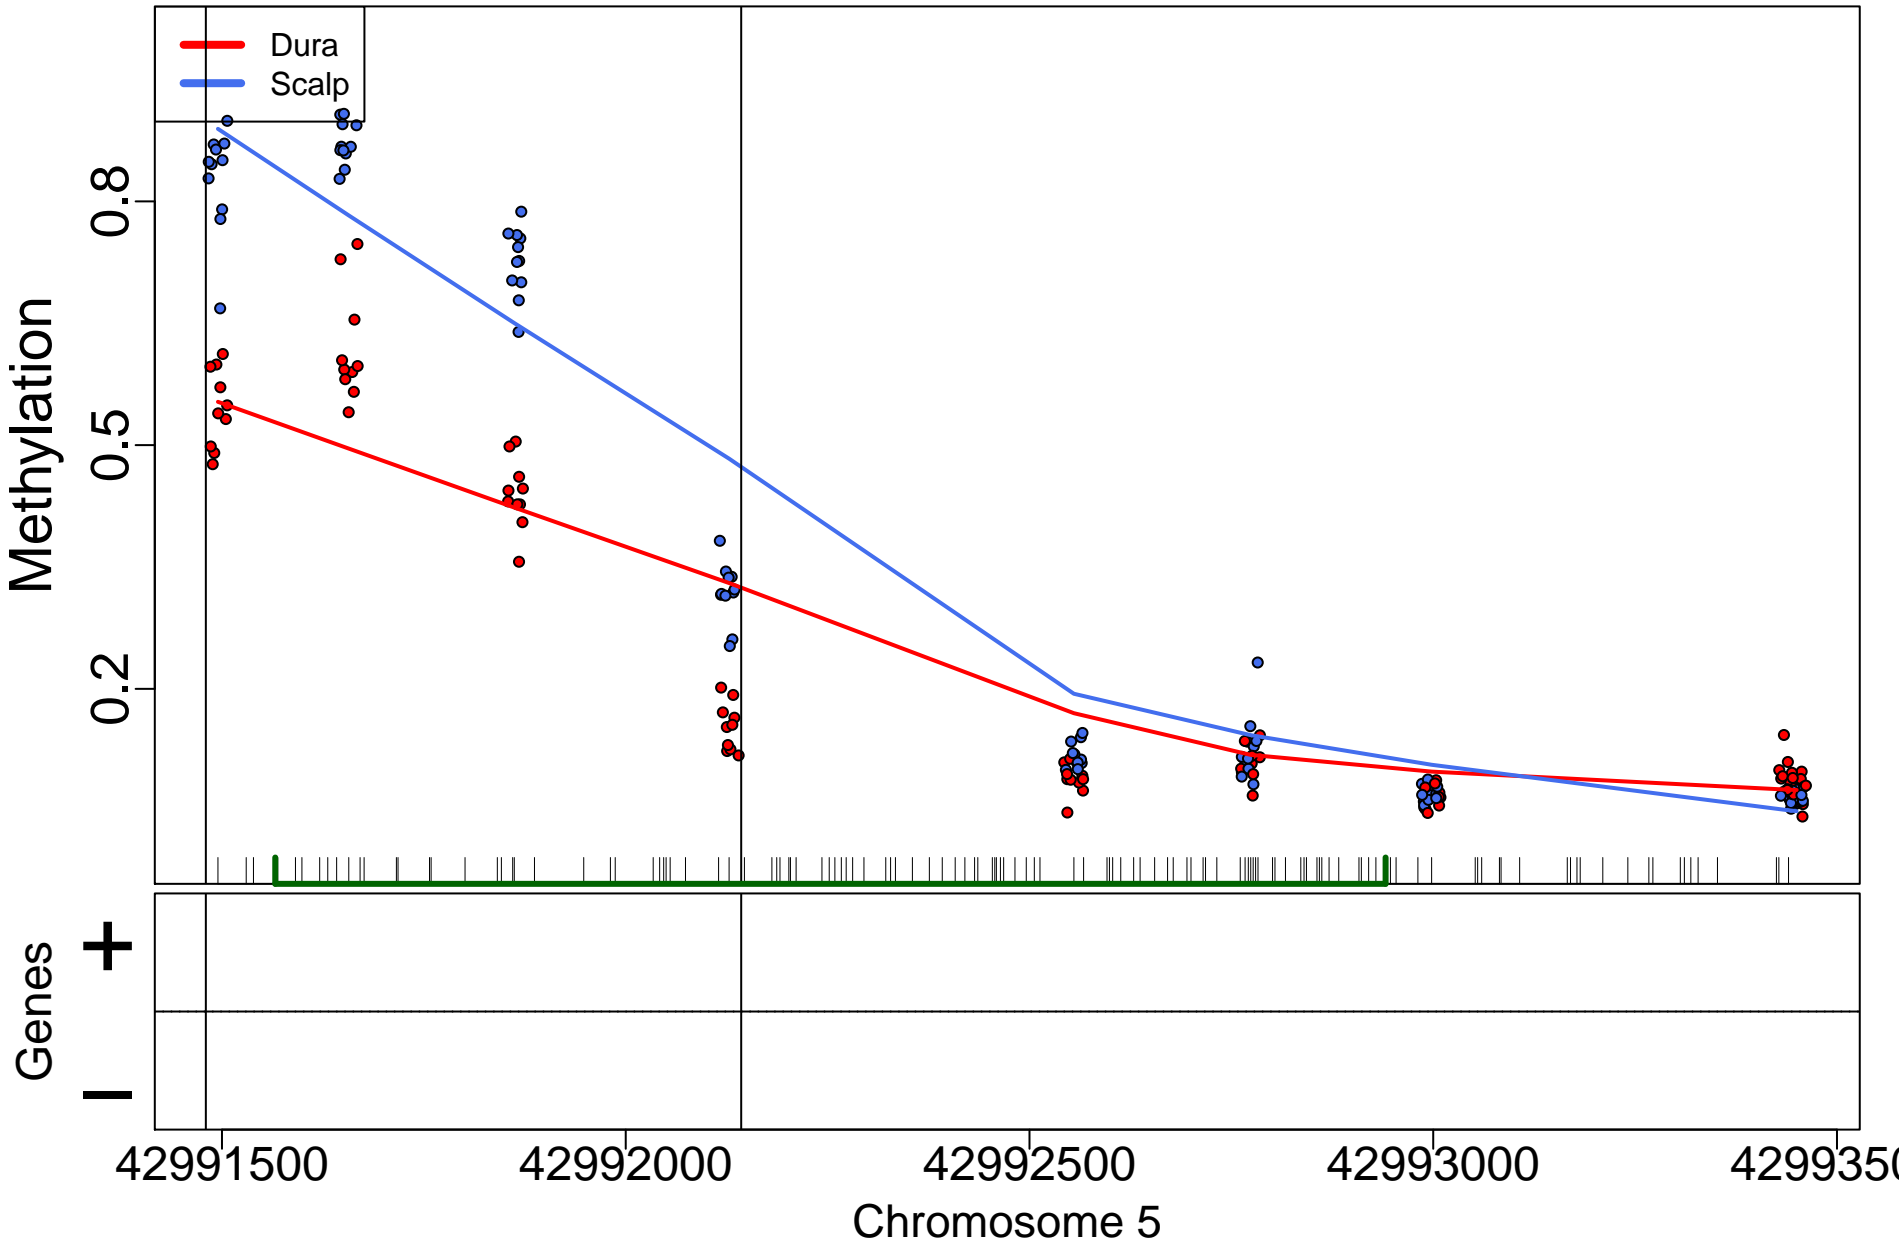



## HAND2; 6223bp from tss:downstream

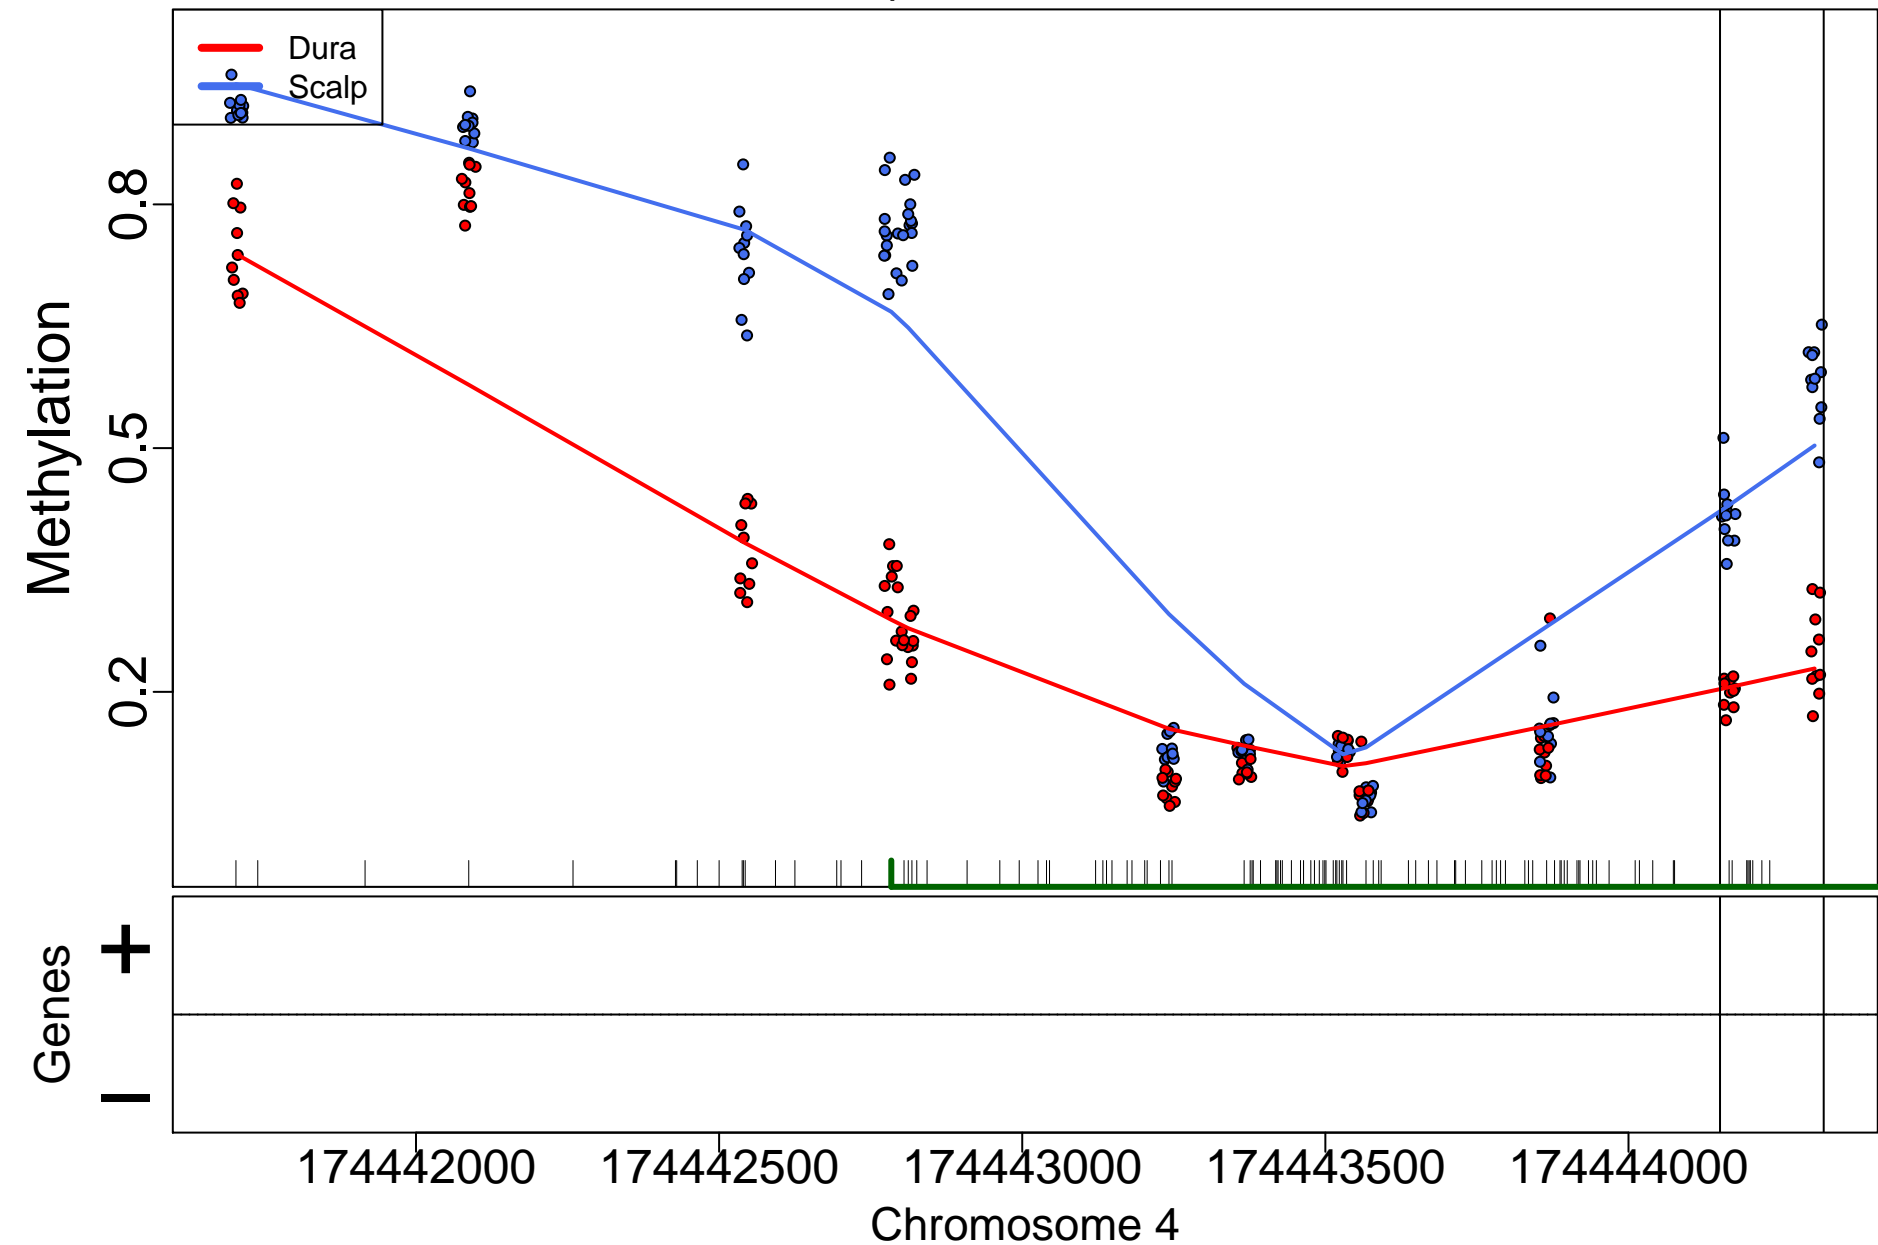

## ADARB2; 551231bp from tss:inside exon

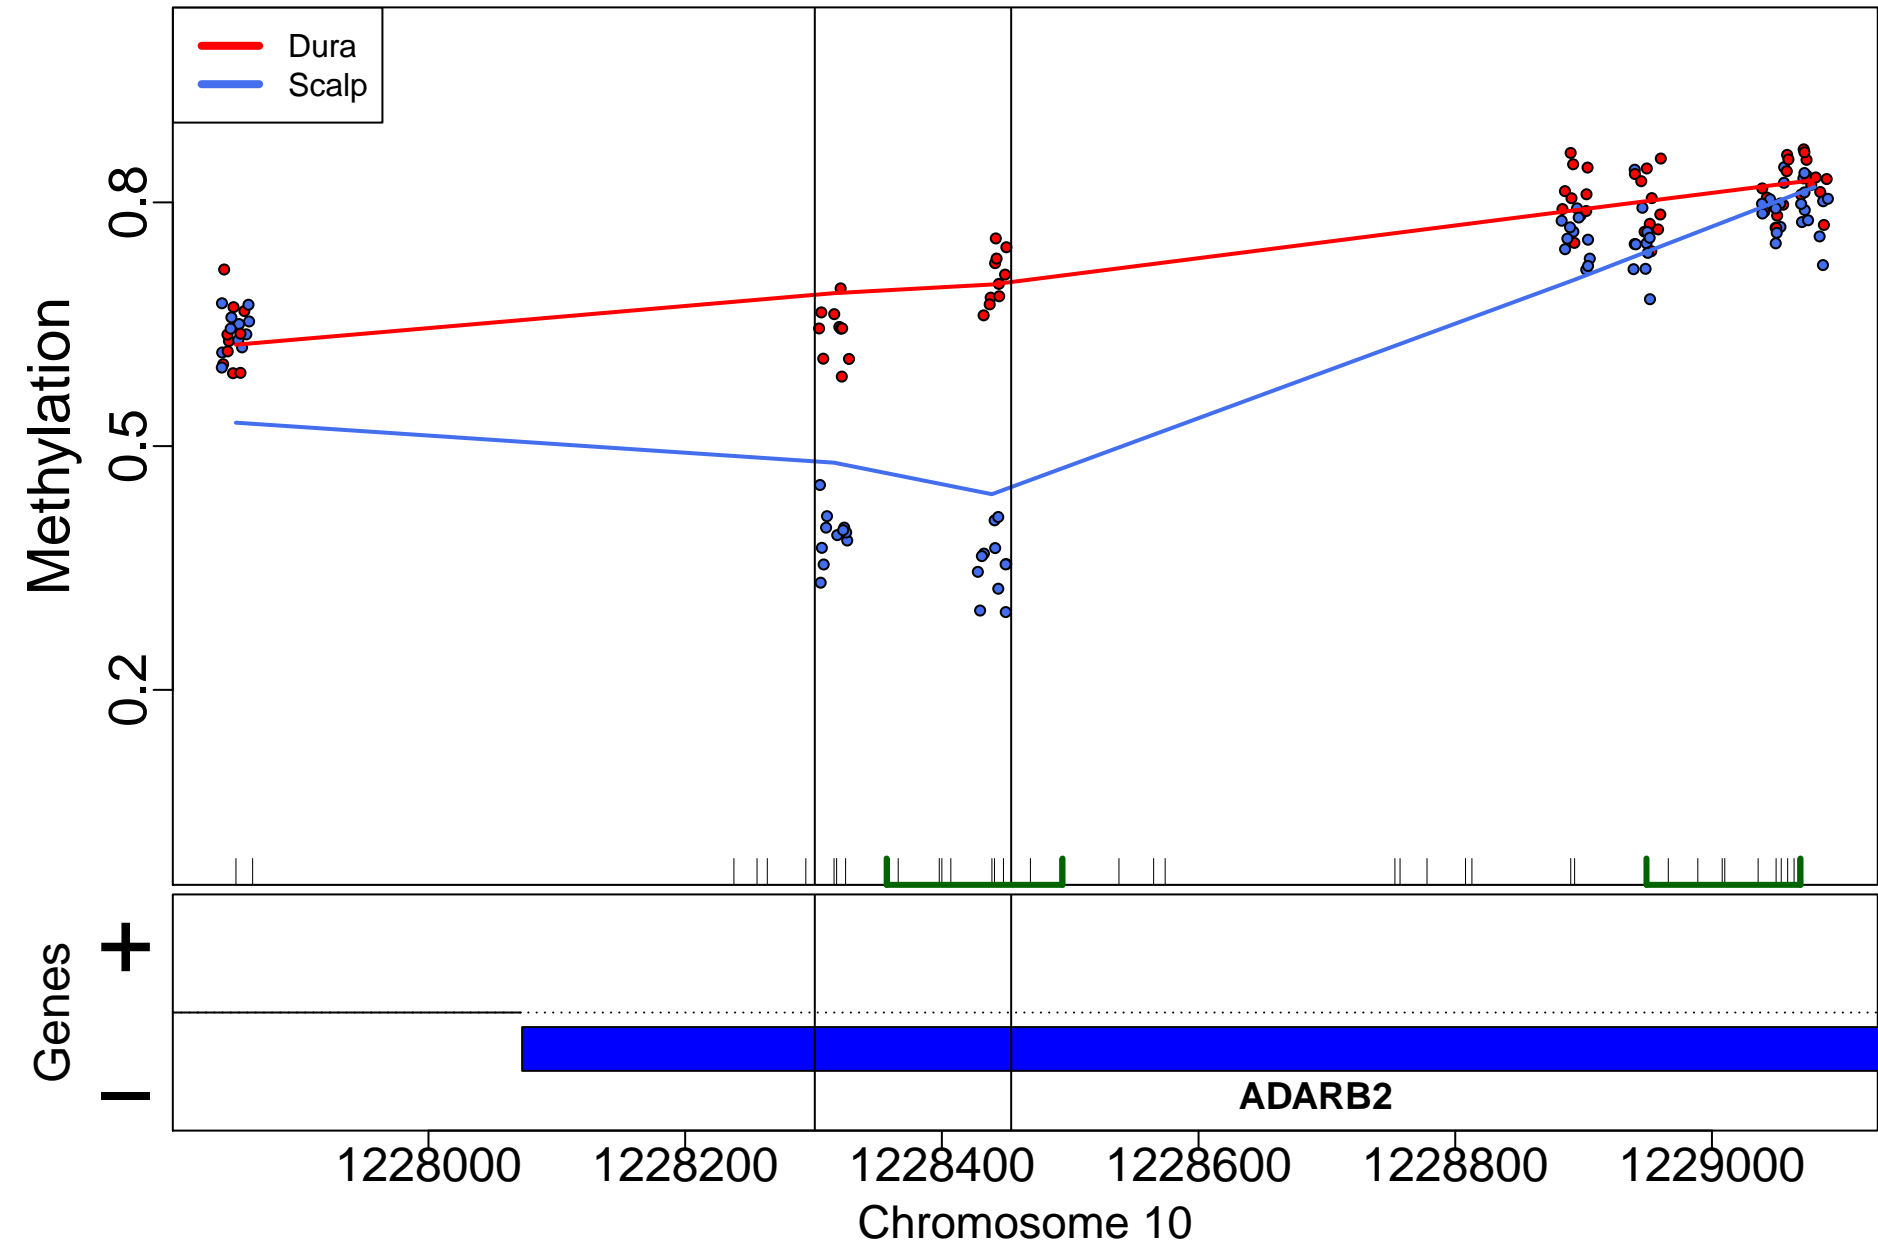

# NPTN; 701bp from tss:promoter

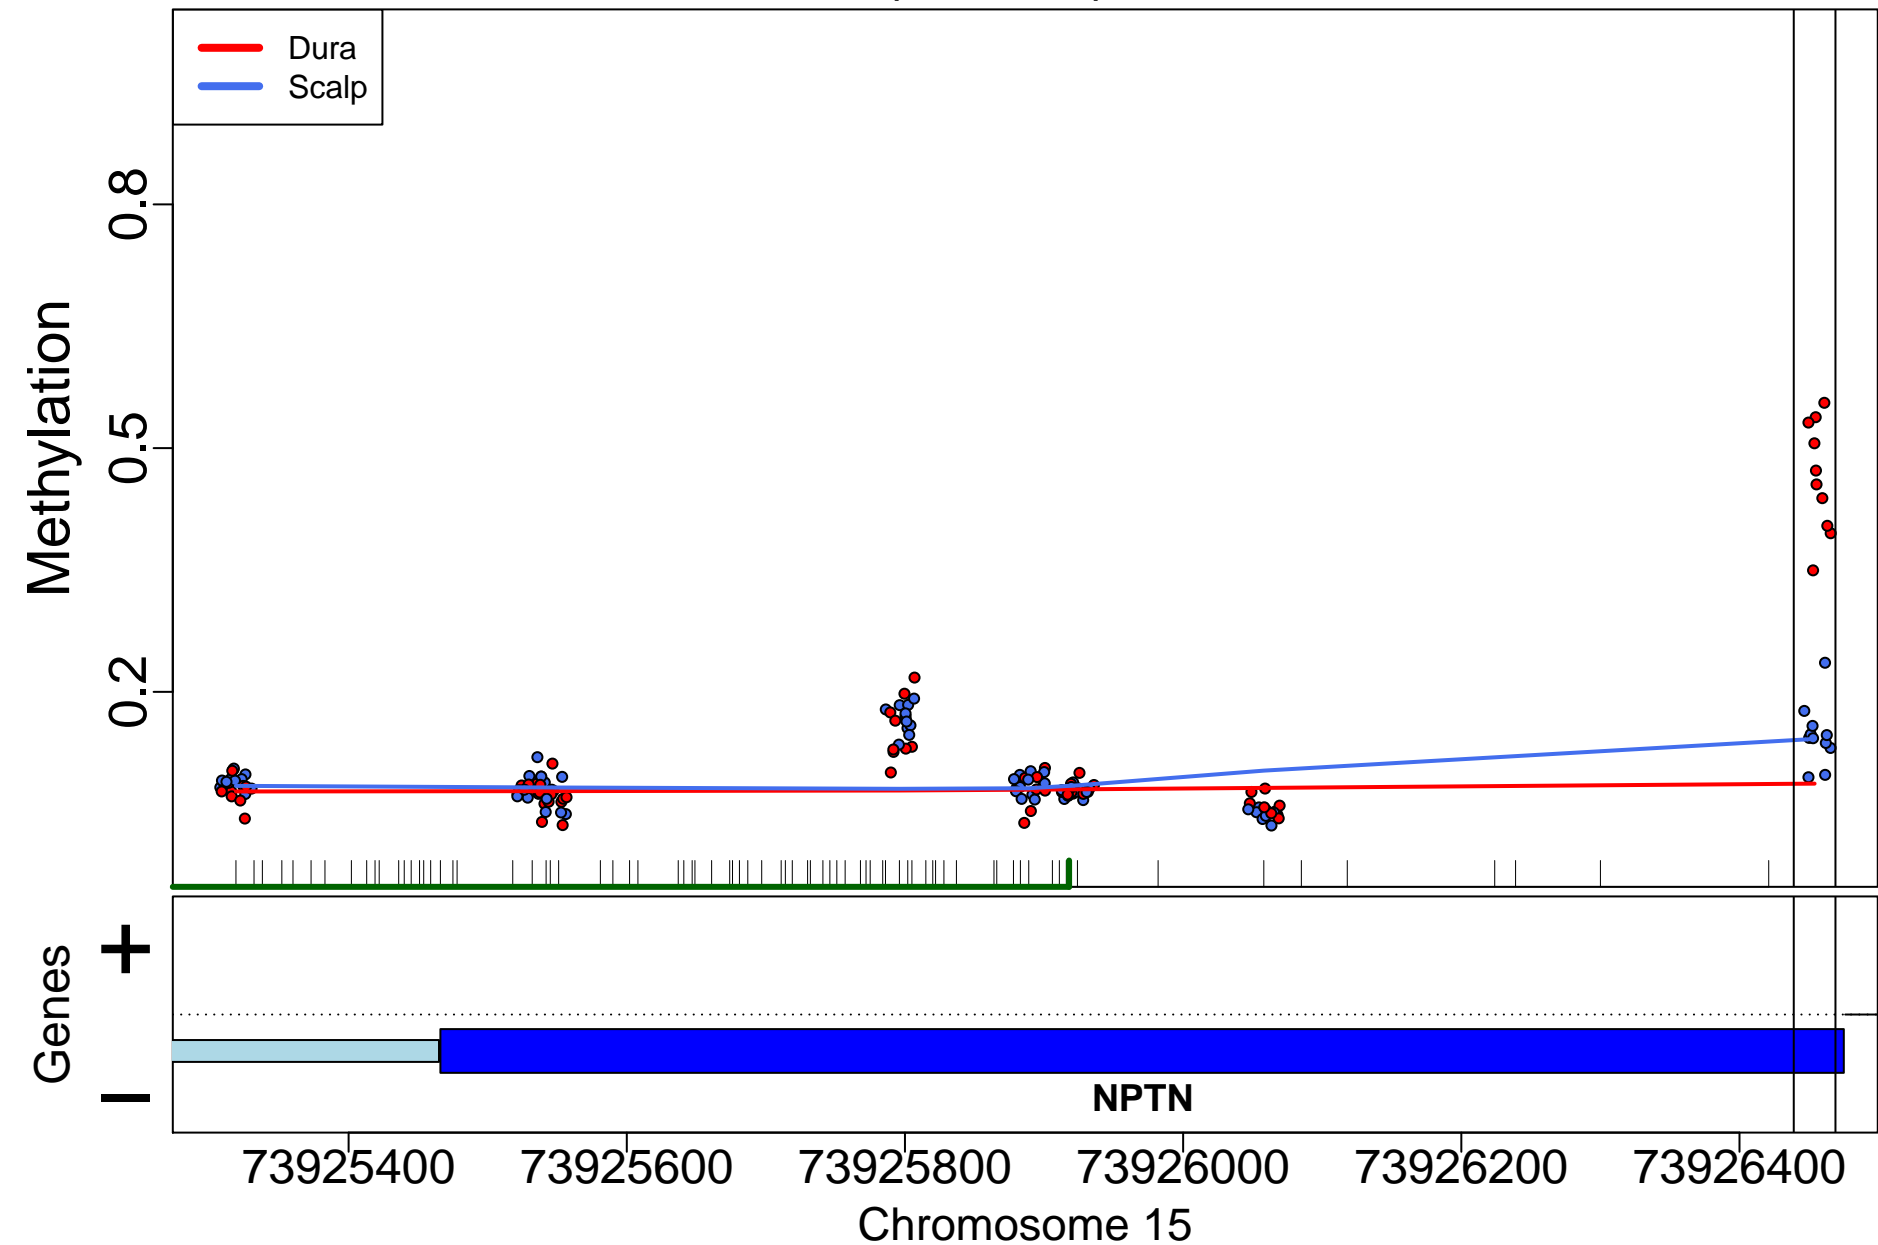

PRDM6; 0bp from tss:NA

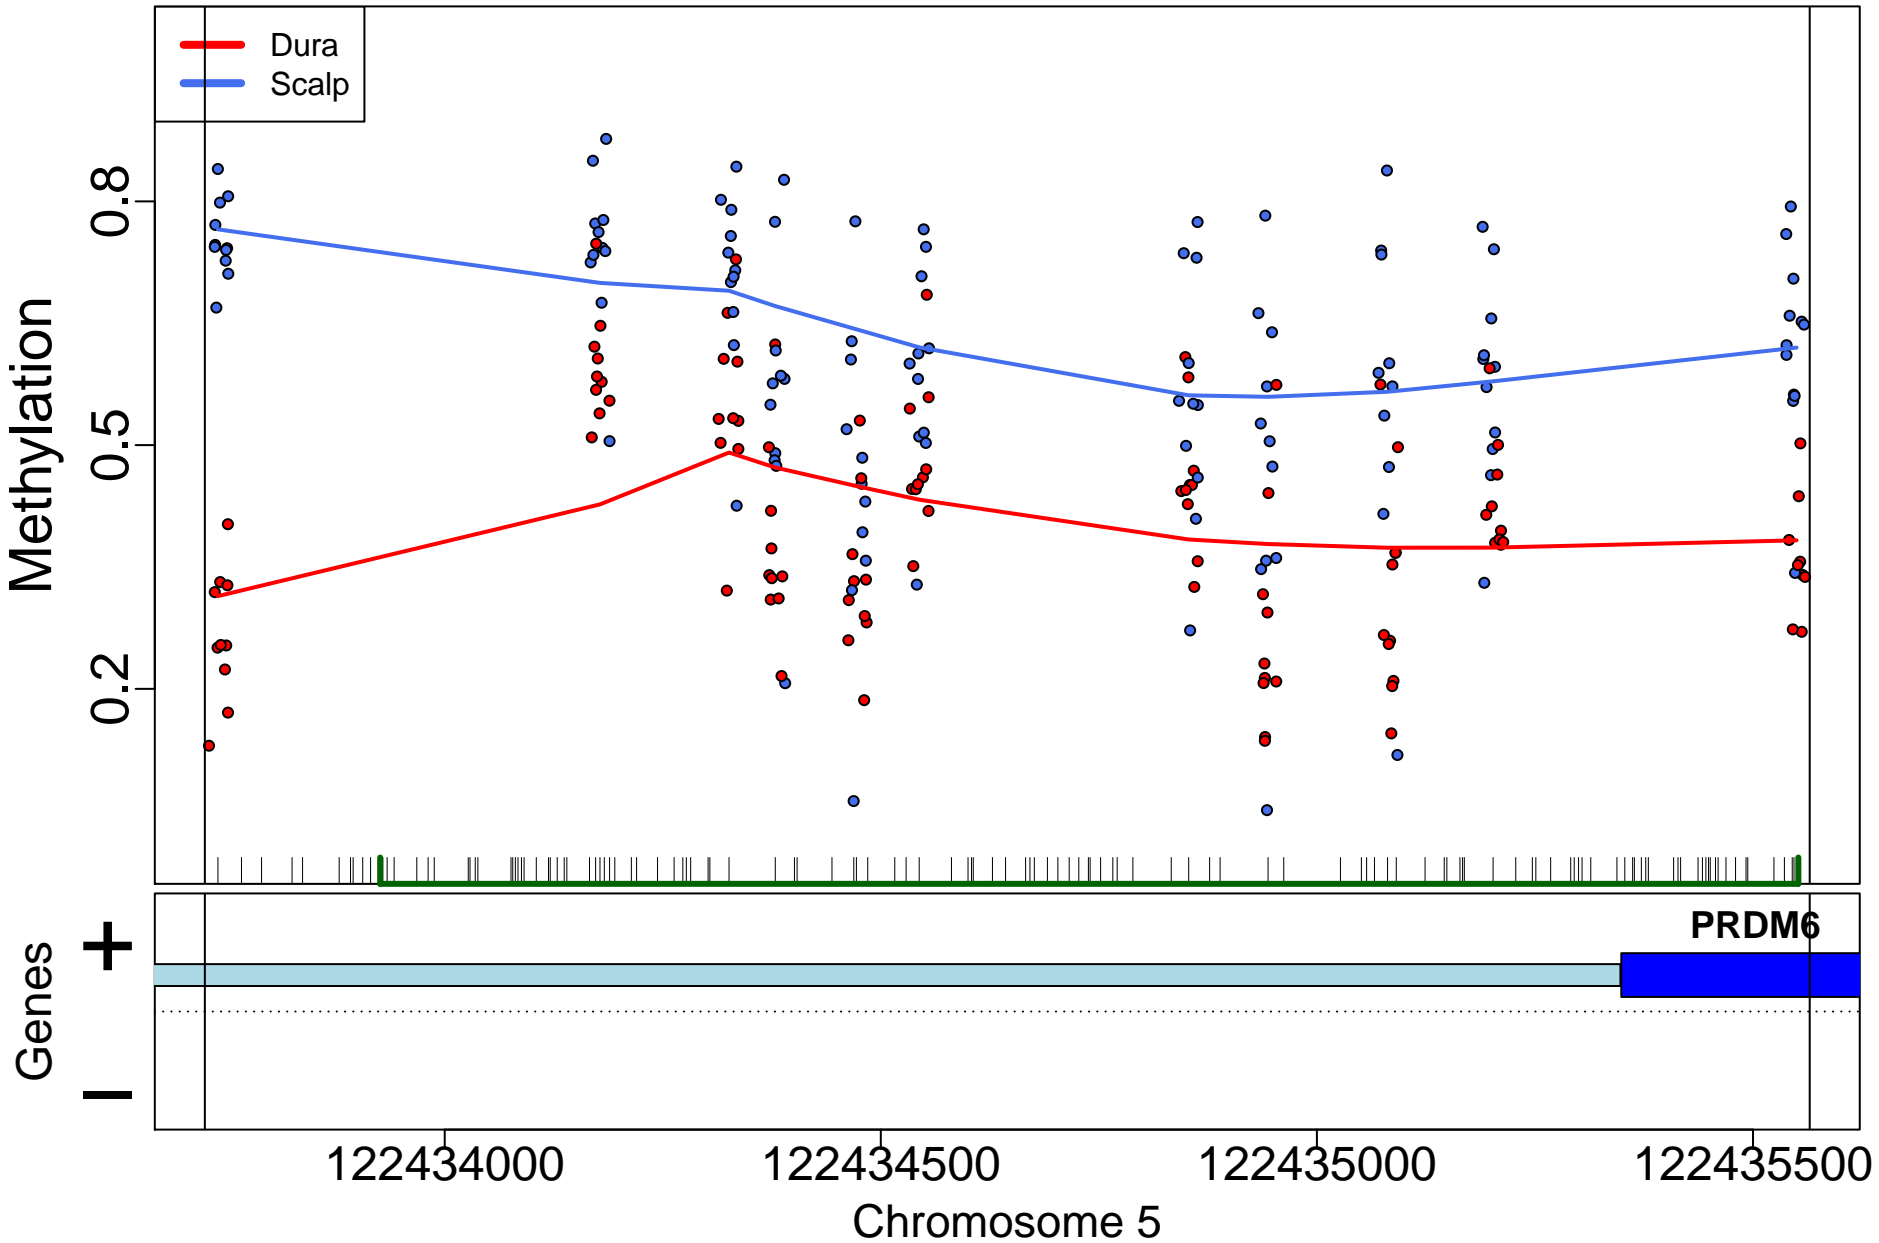

PLD1; 254bp from tss:promoter

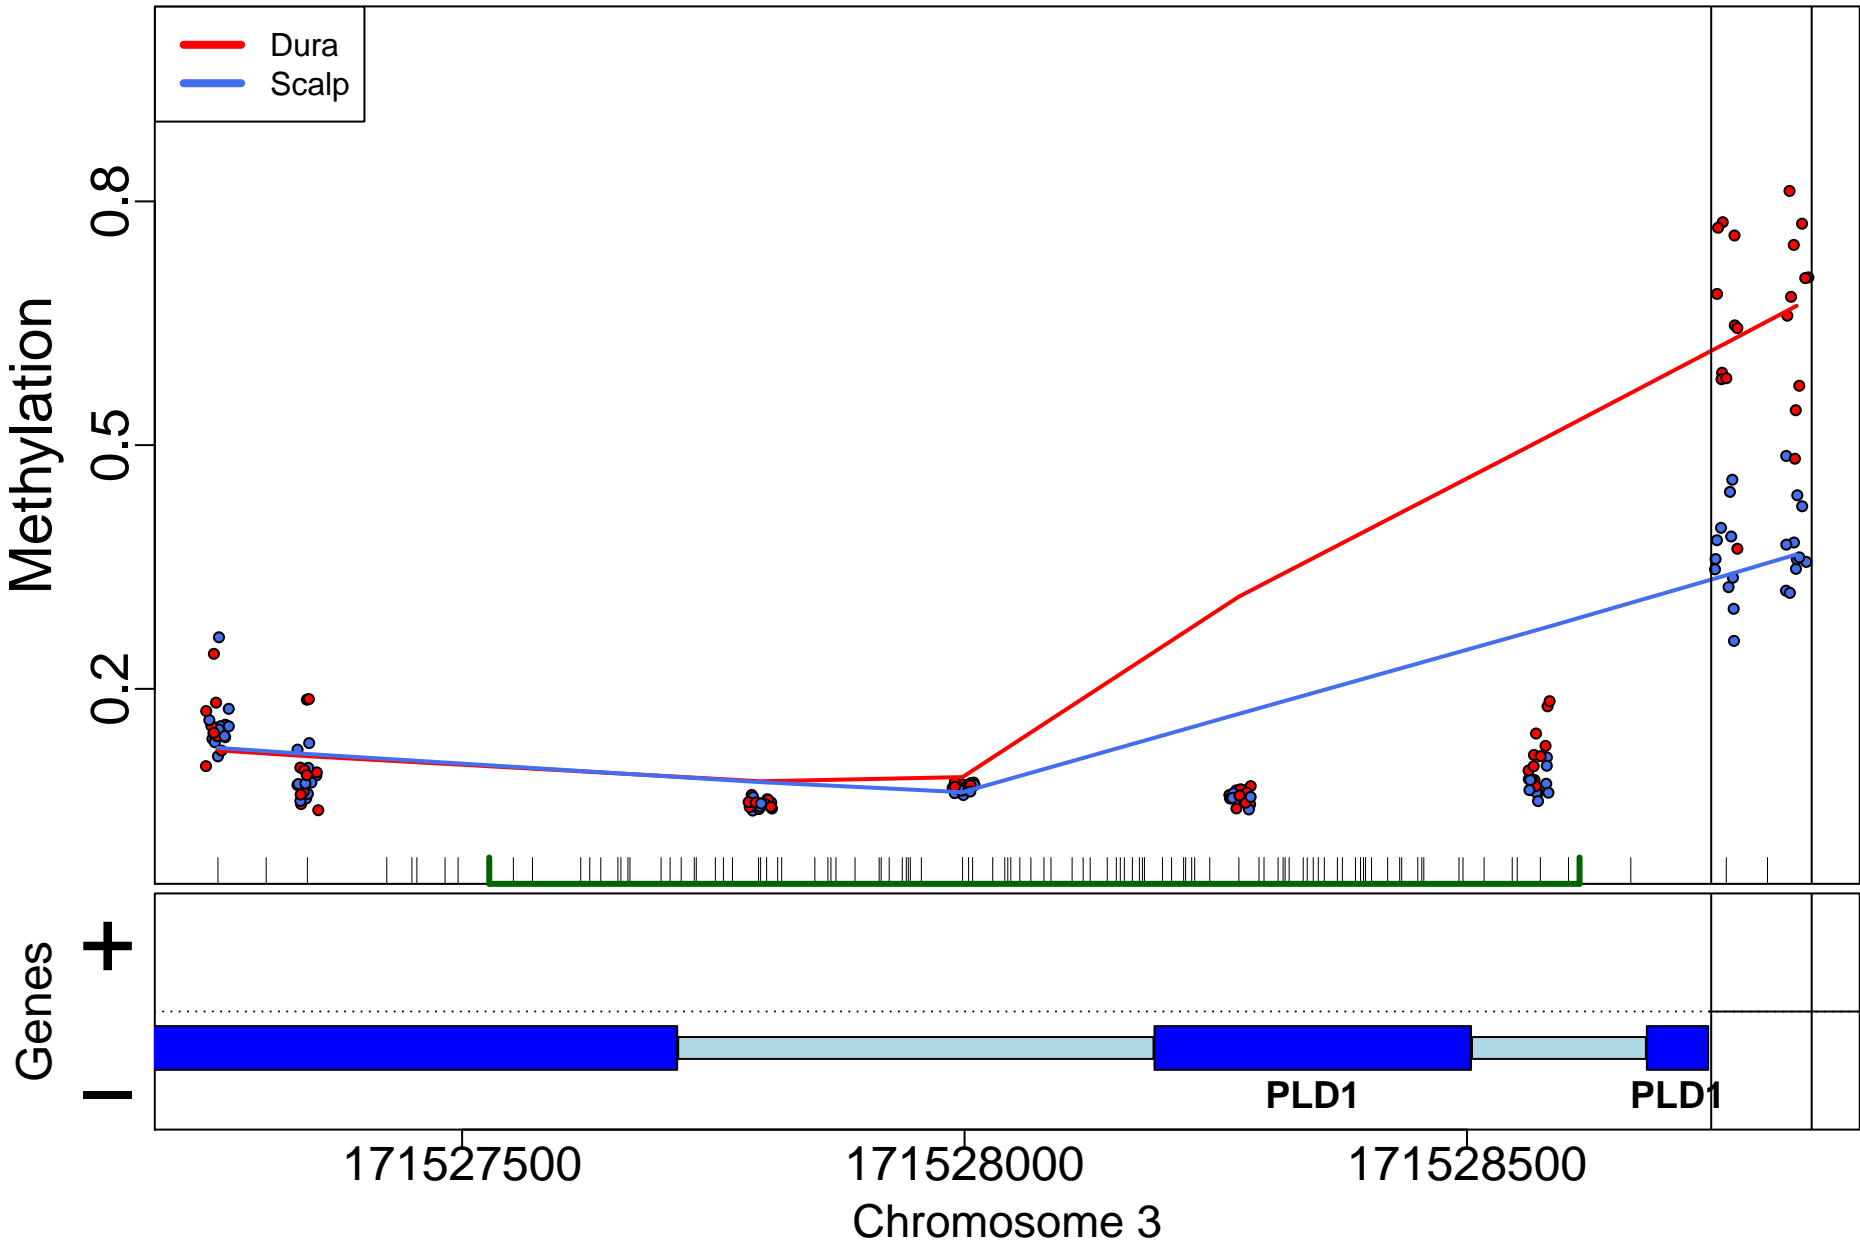

## GRB14; 593bp from tss:promoter

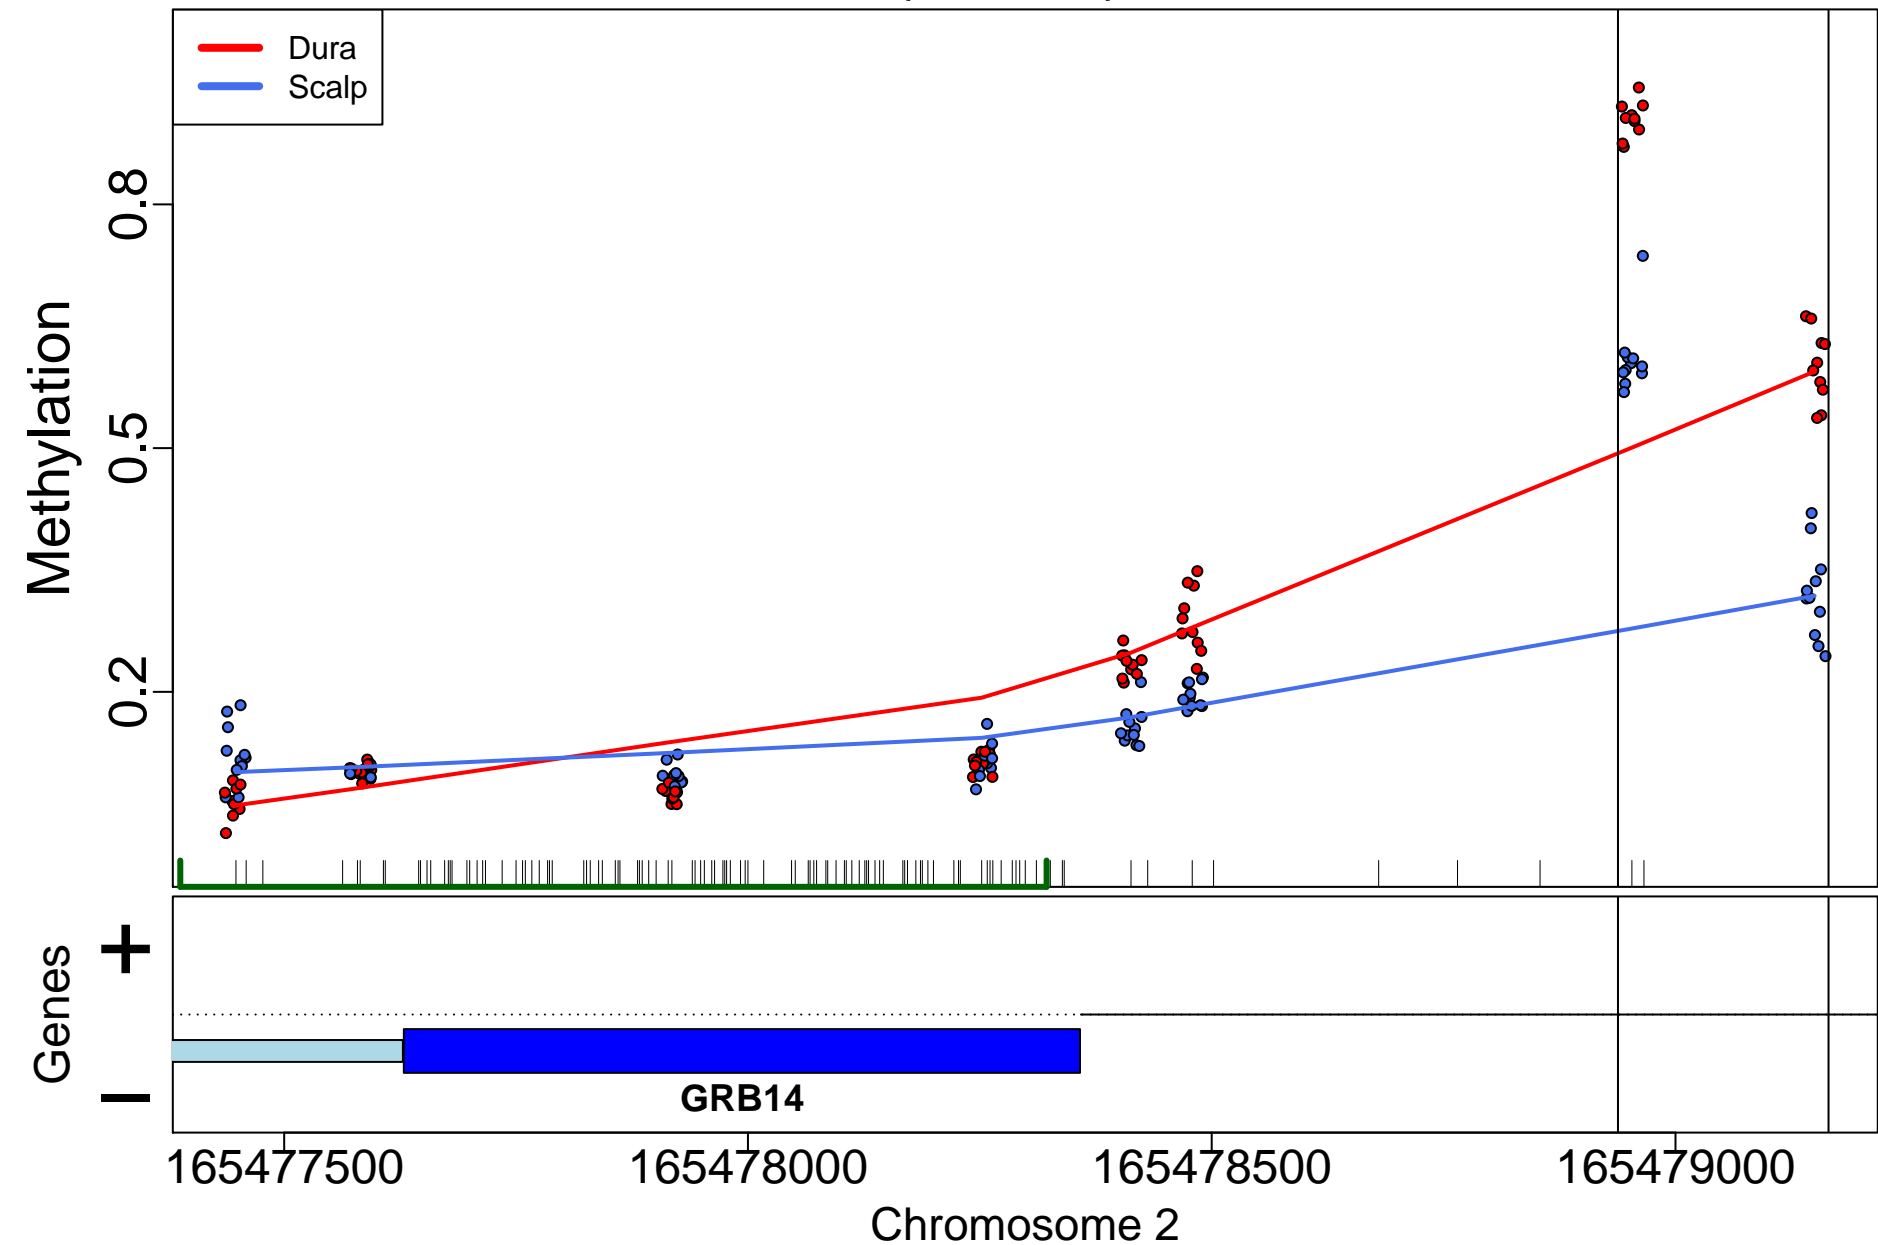

ANKRD37; 1166bp from tss:promoter

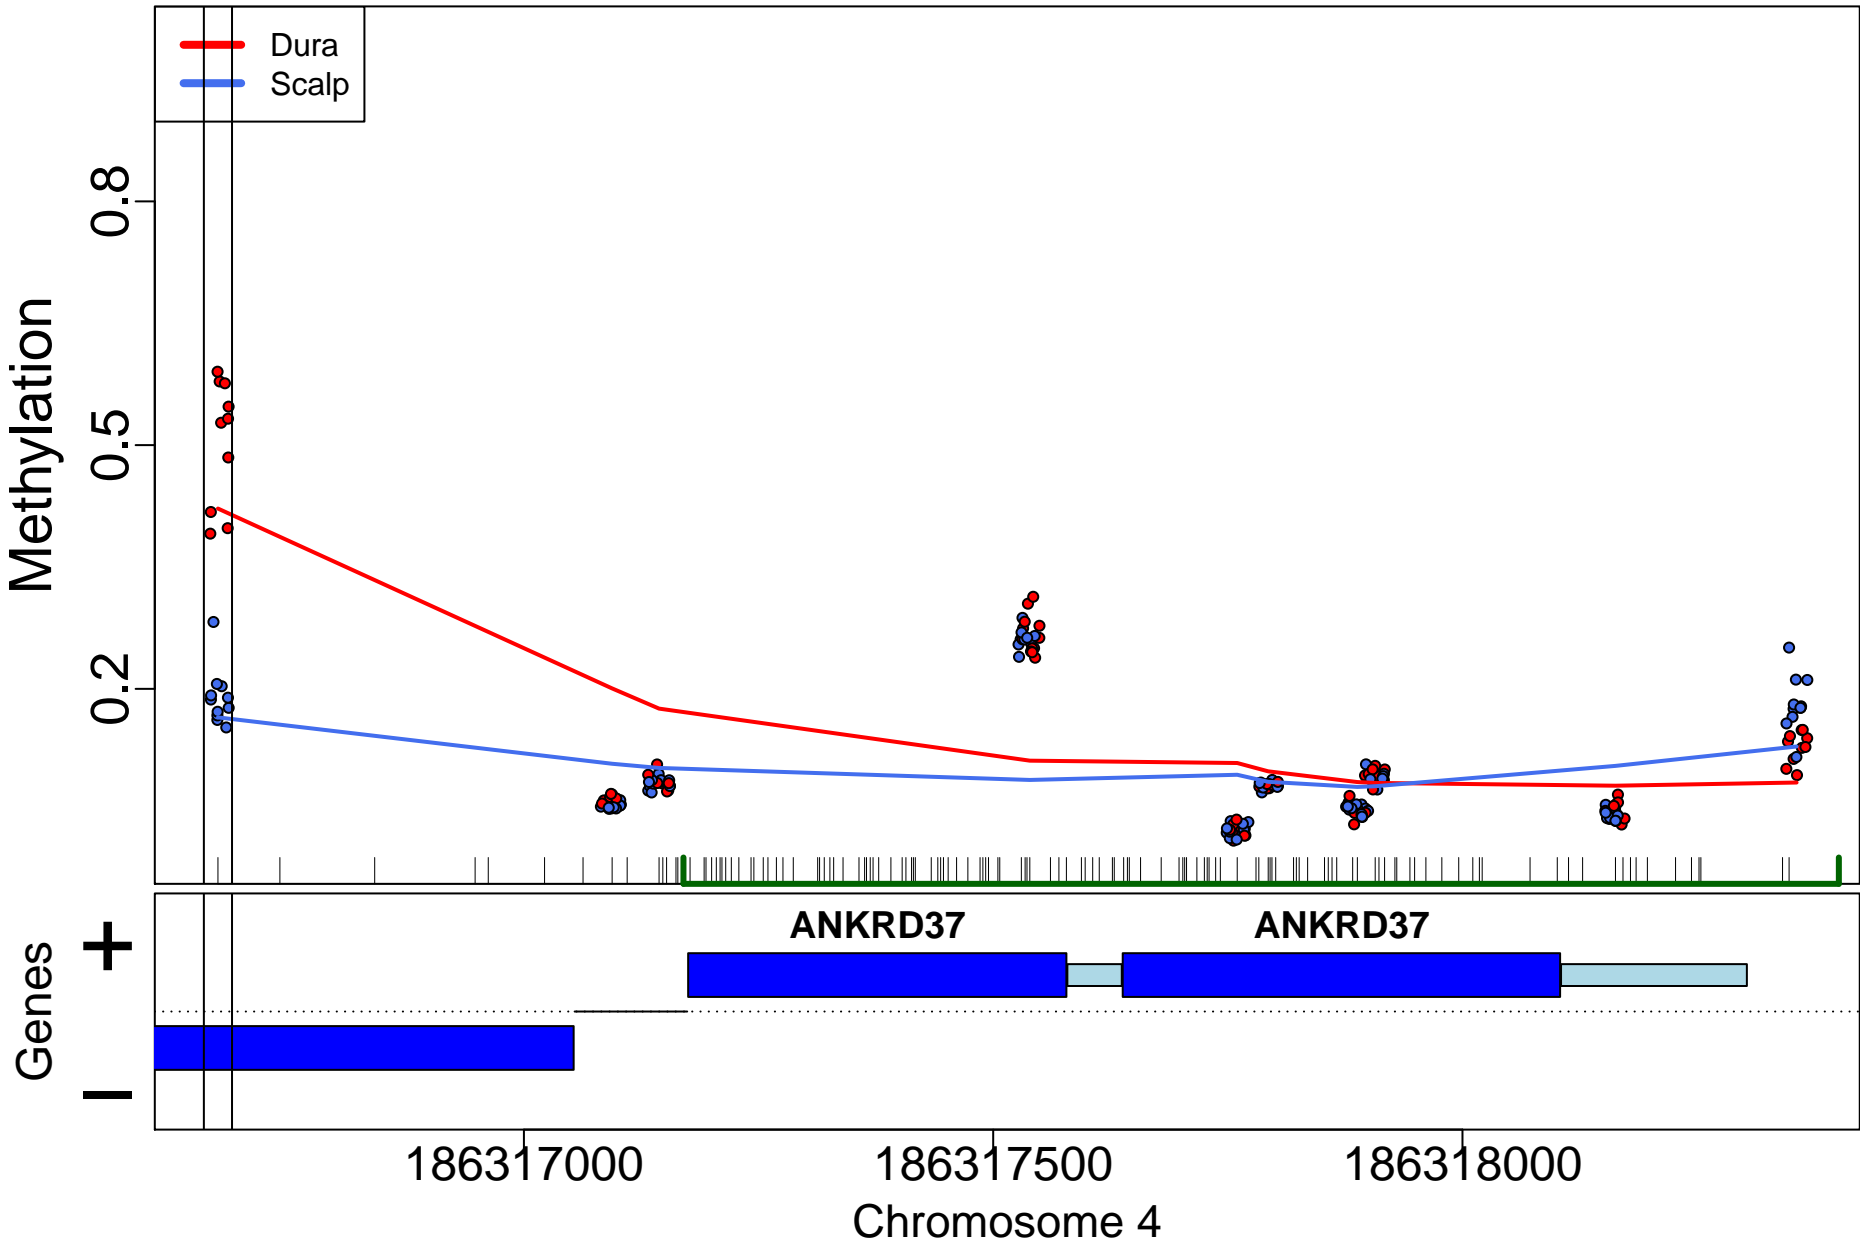

CAV1; 234202bp from tss:inside intron

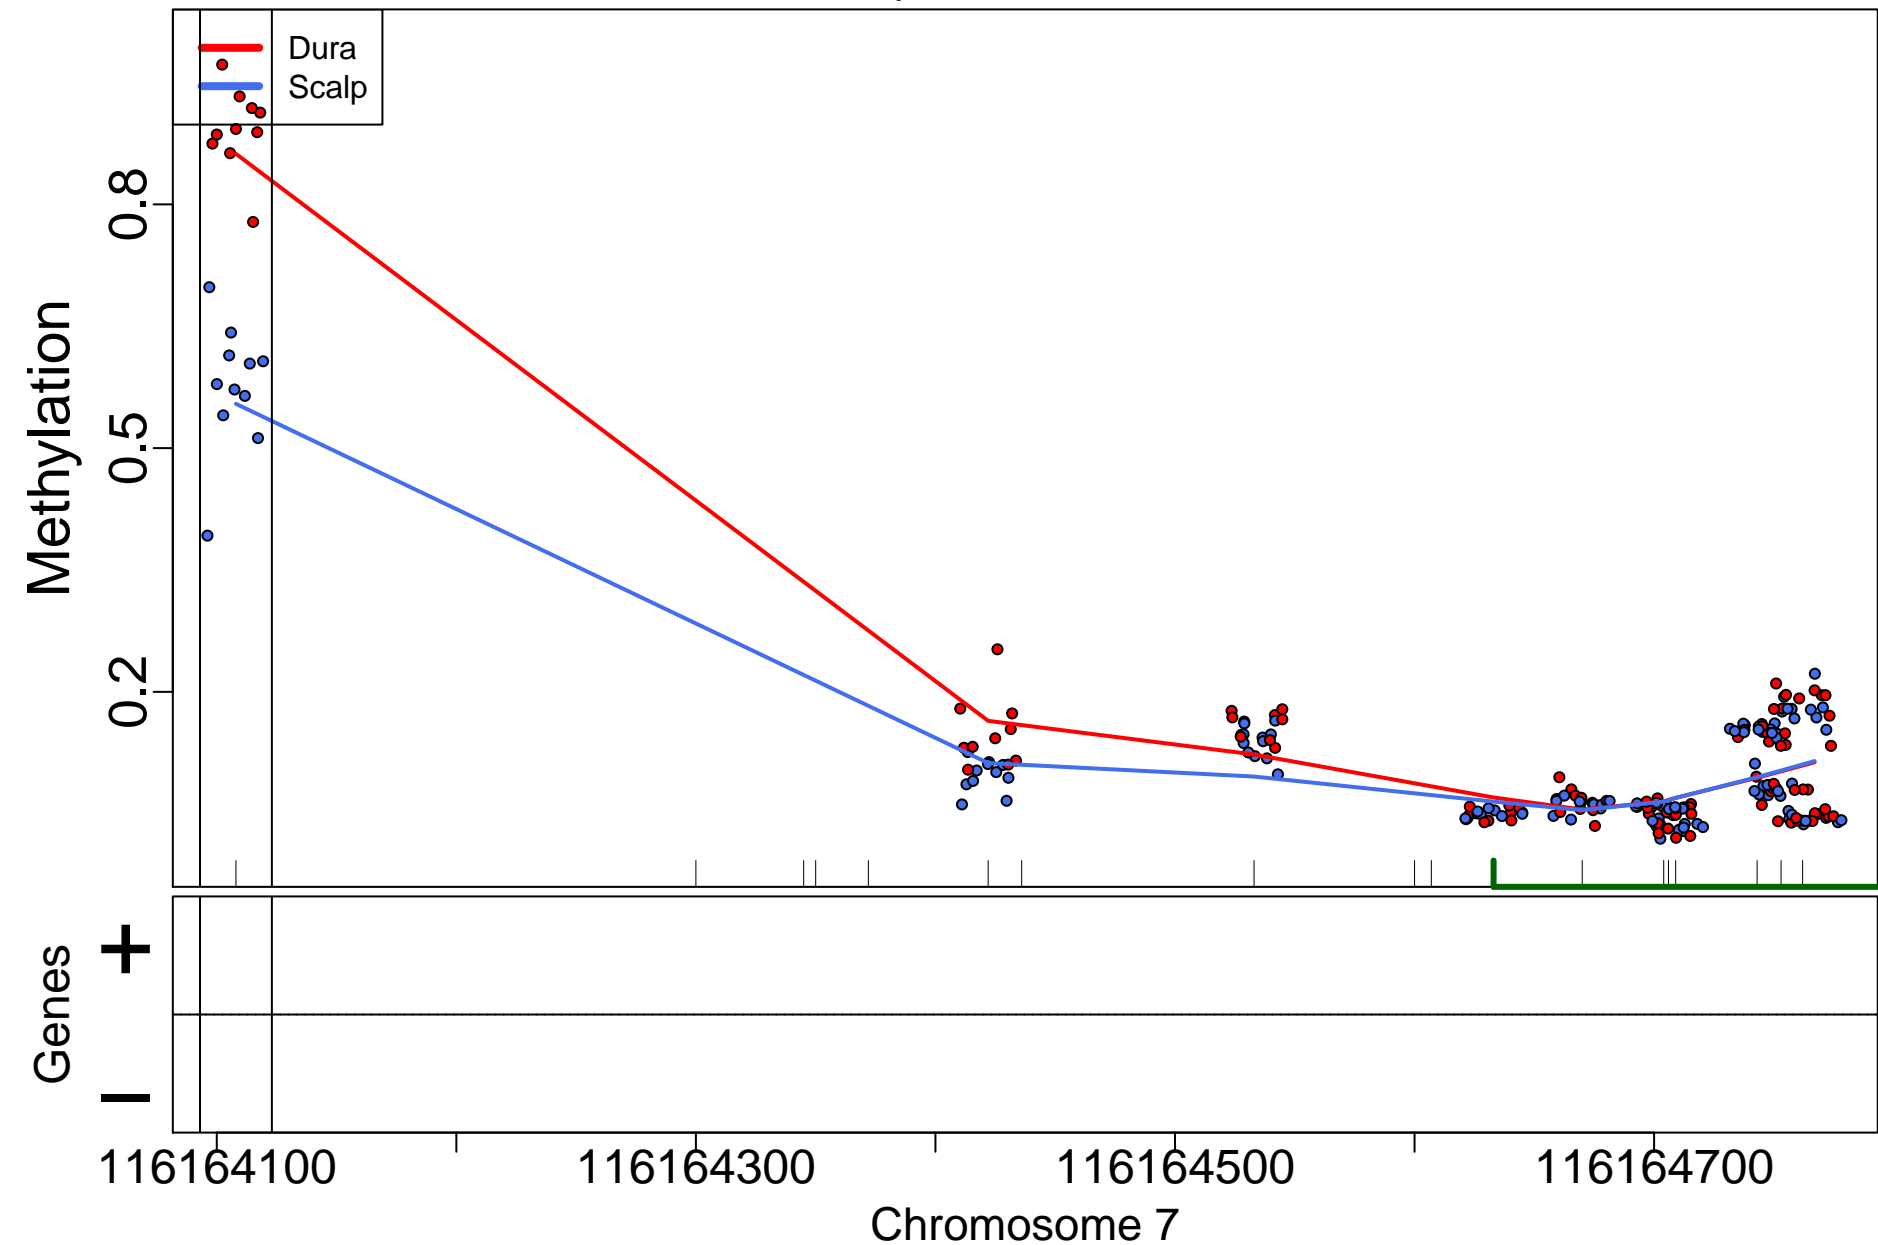



# ADAMTSL5; 1237bp from tss:promoter

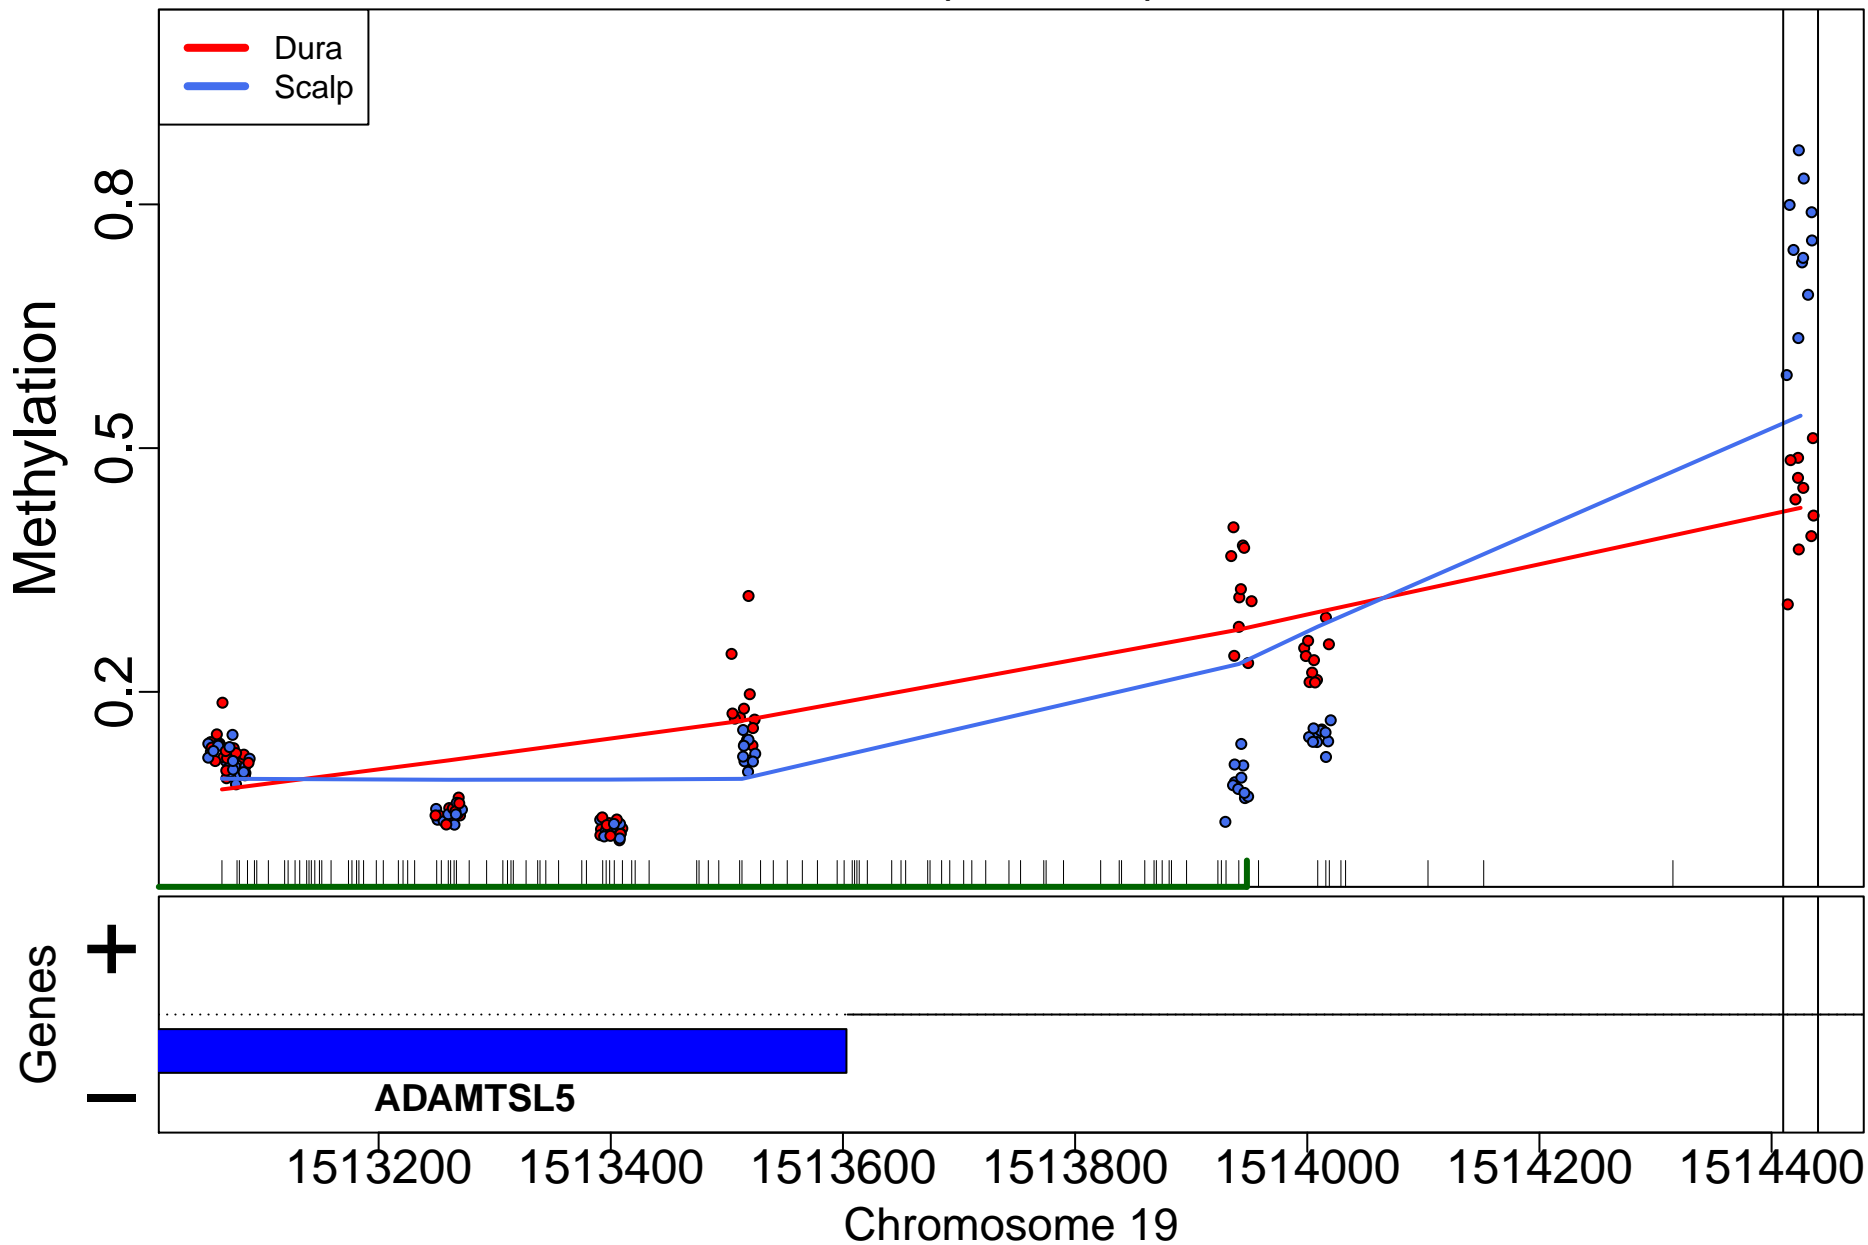

# CCDC63; 583bp from tss:promoter

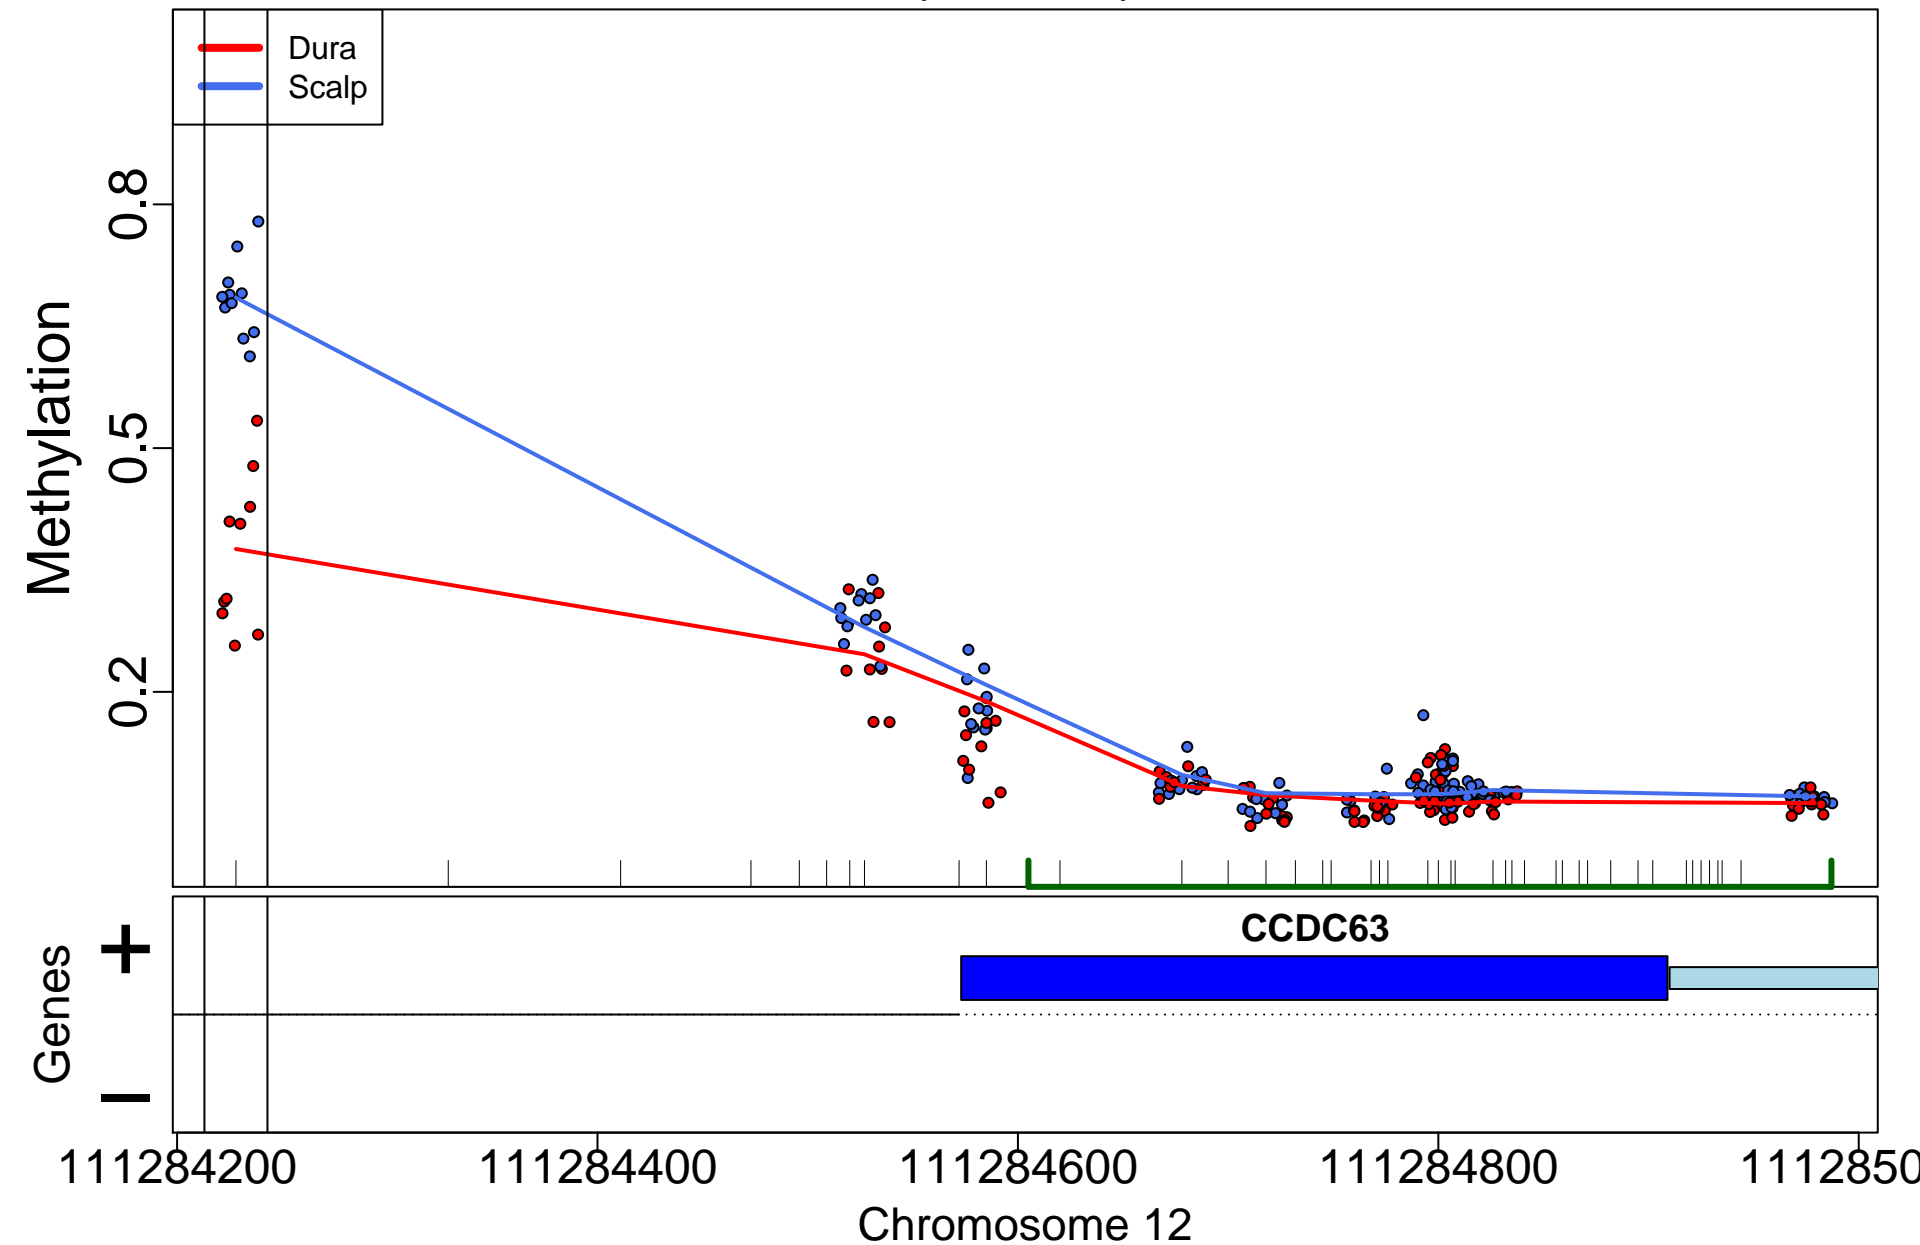

## ADPRHL1; 129bp from tss:inside exon

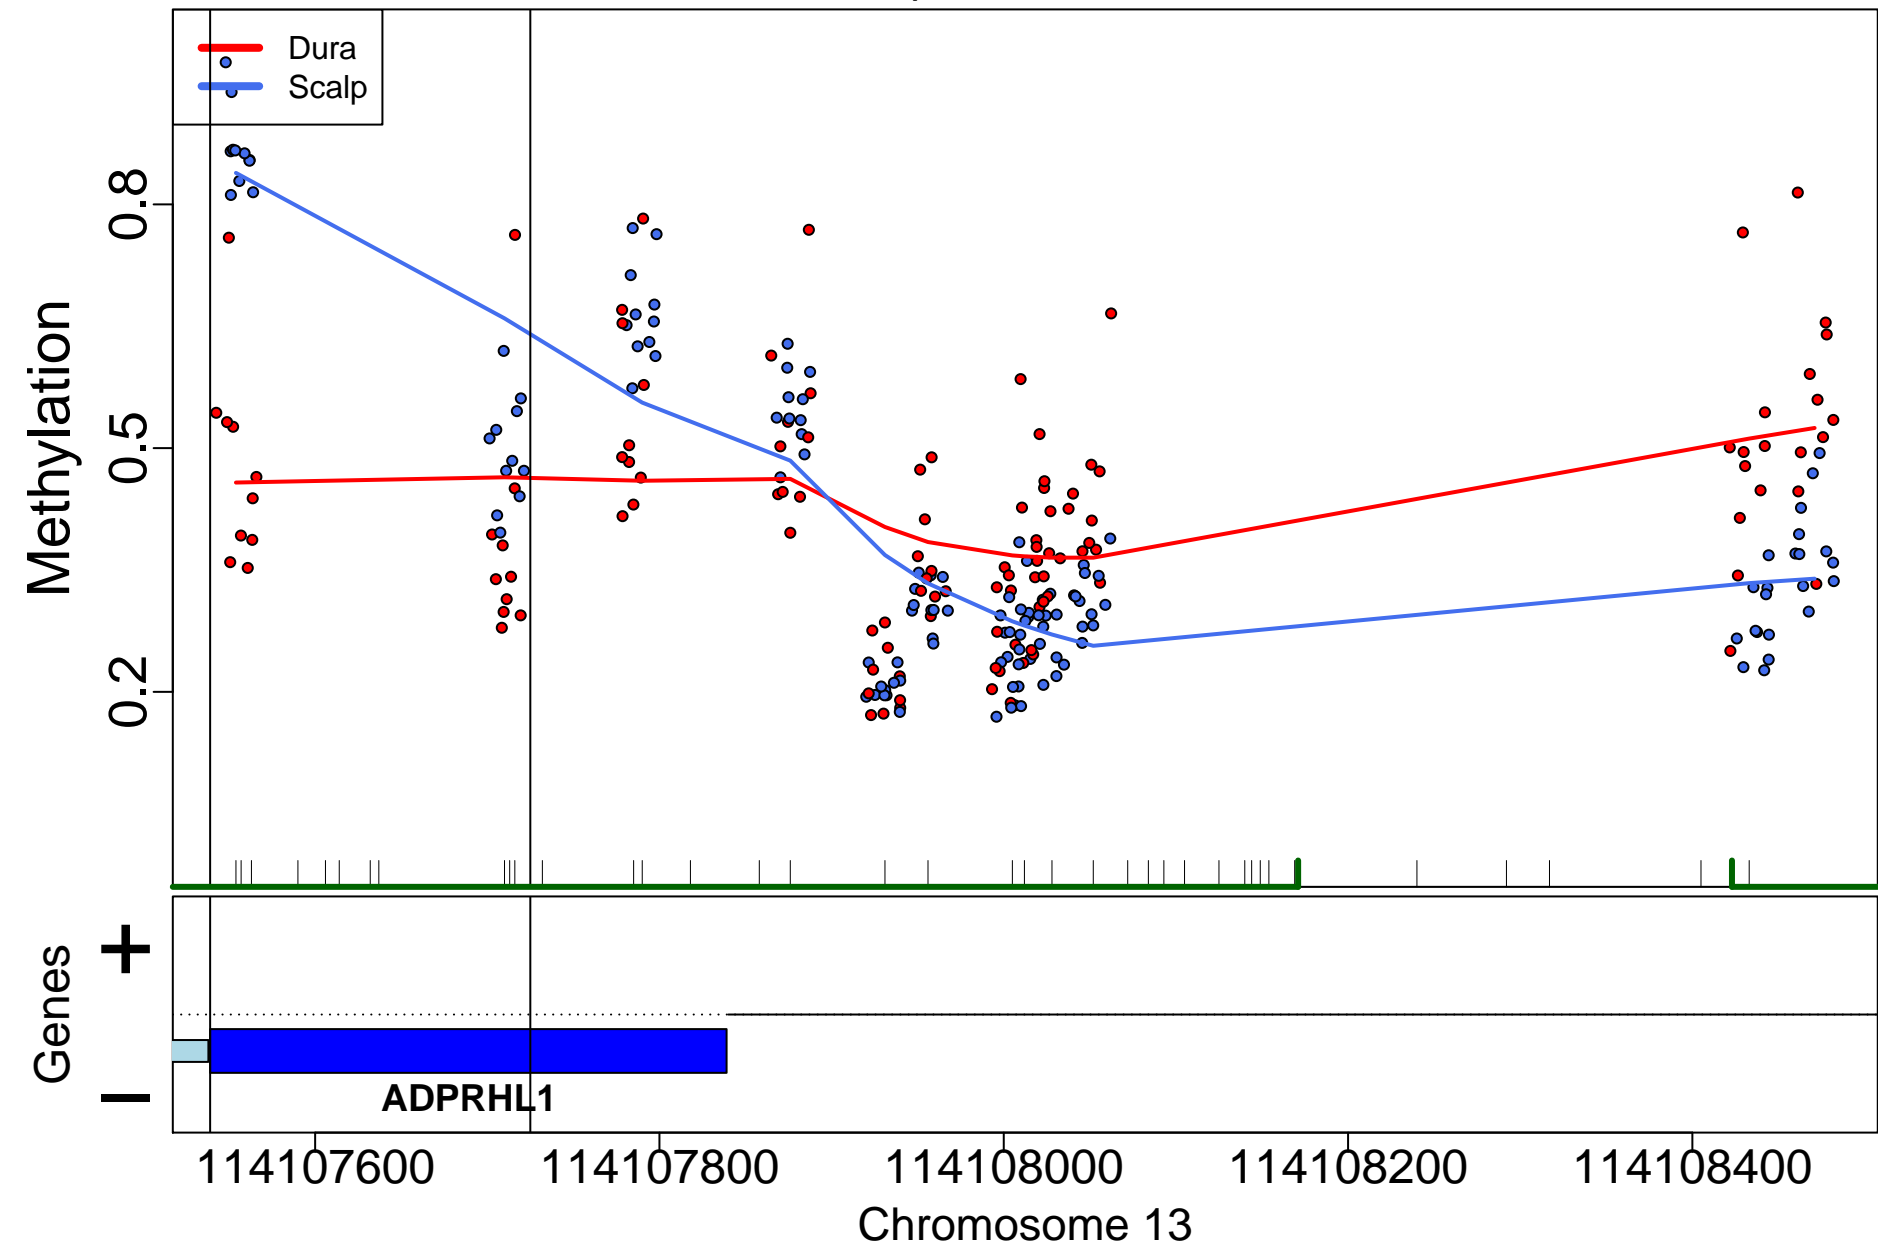

ERN1; 872bp from tss:promoter

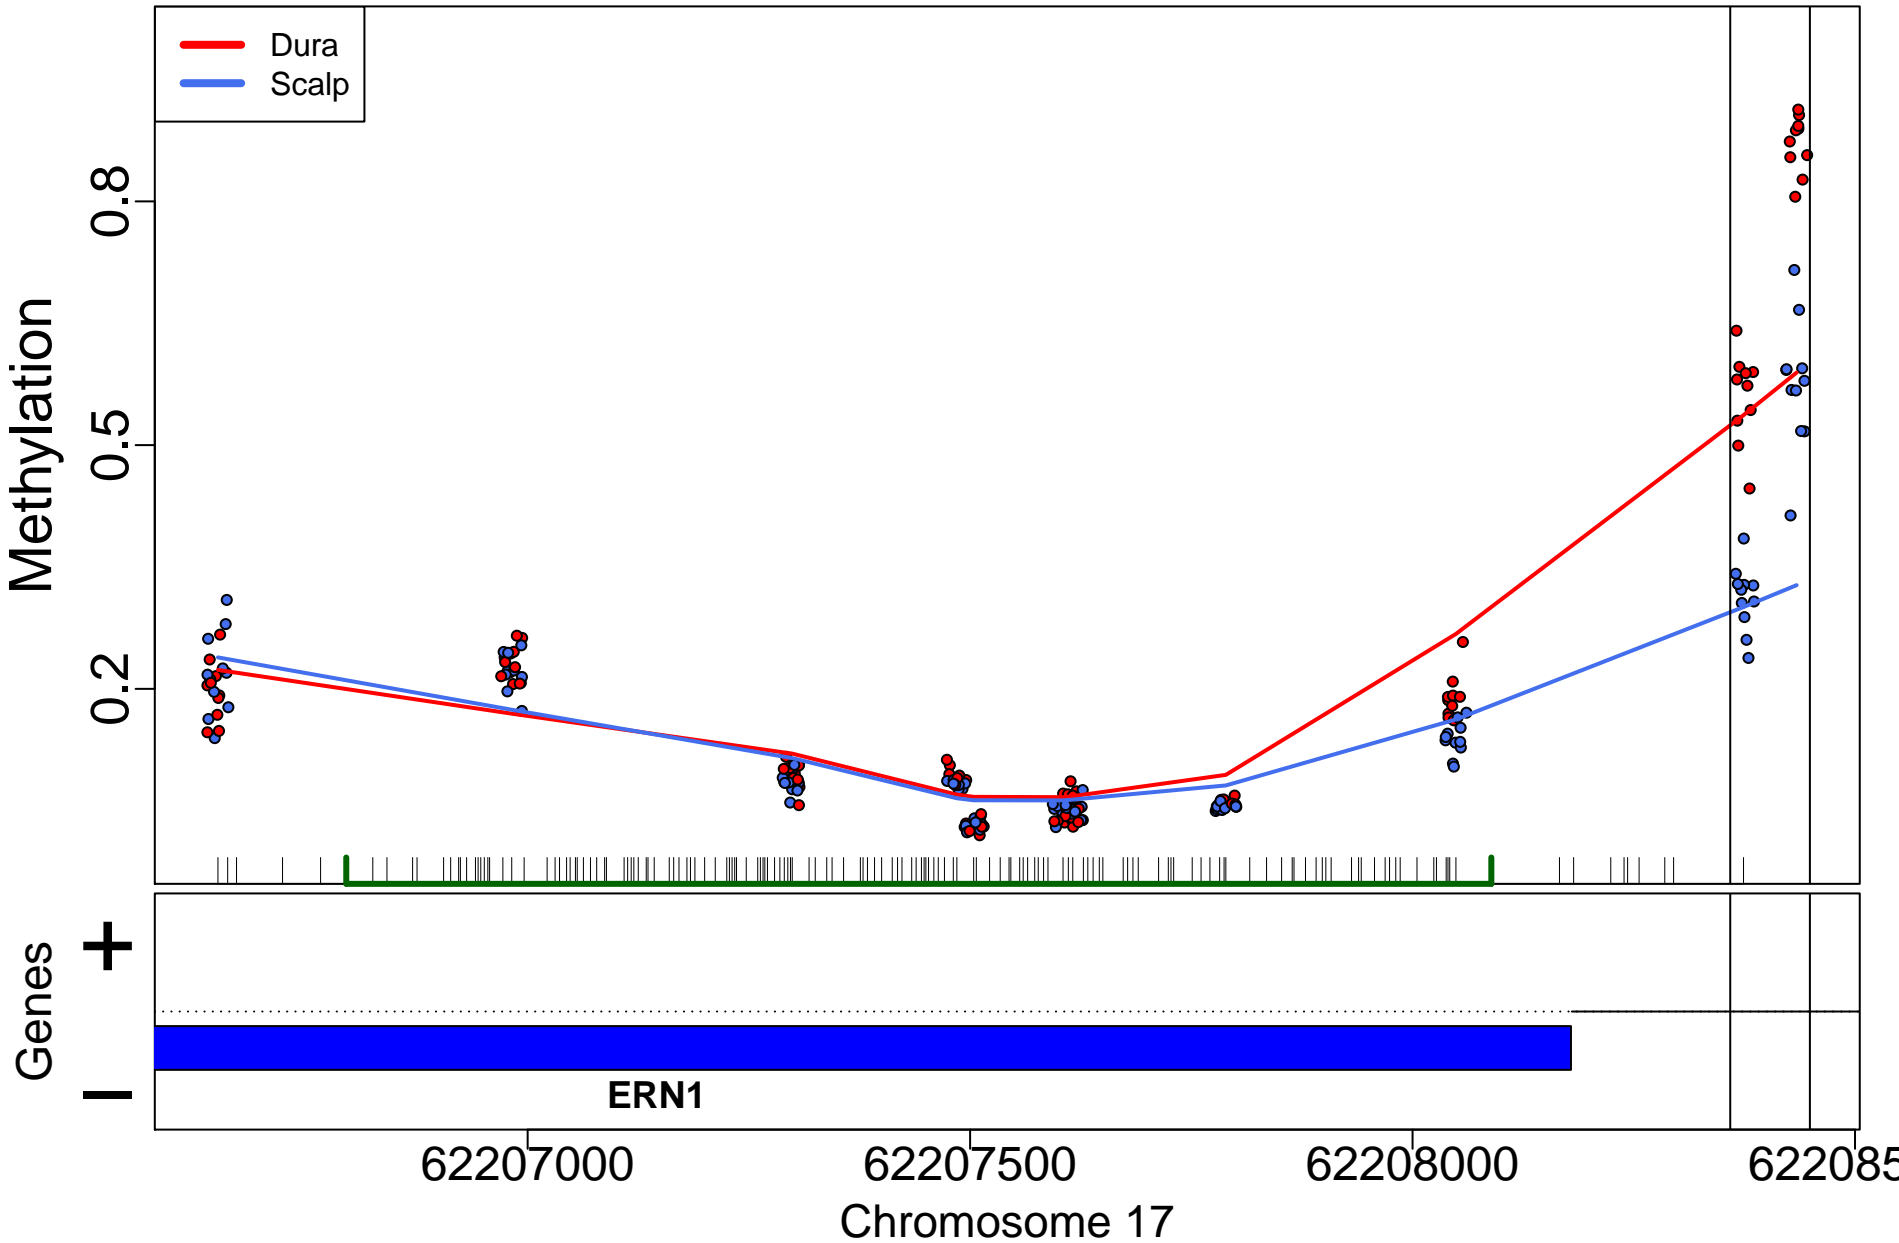

## ADARB2; 533334bp from tss:inside intron

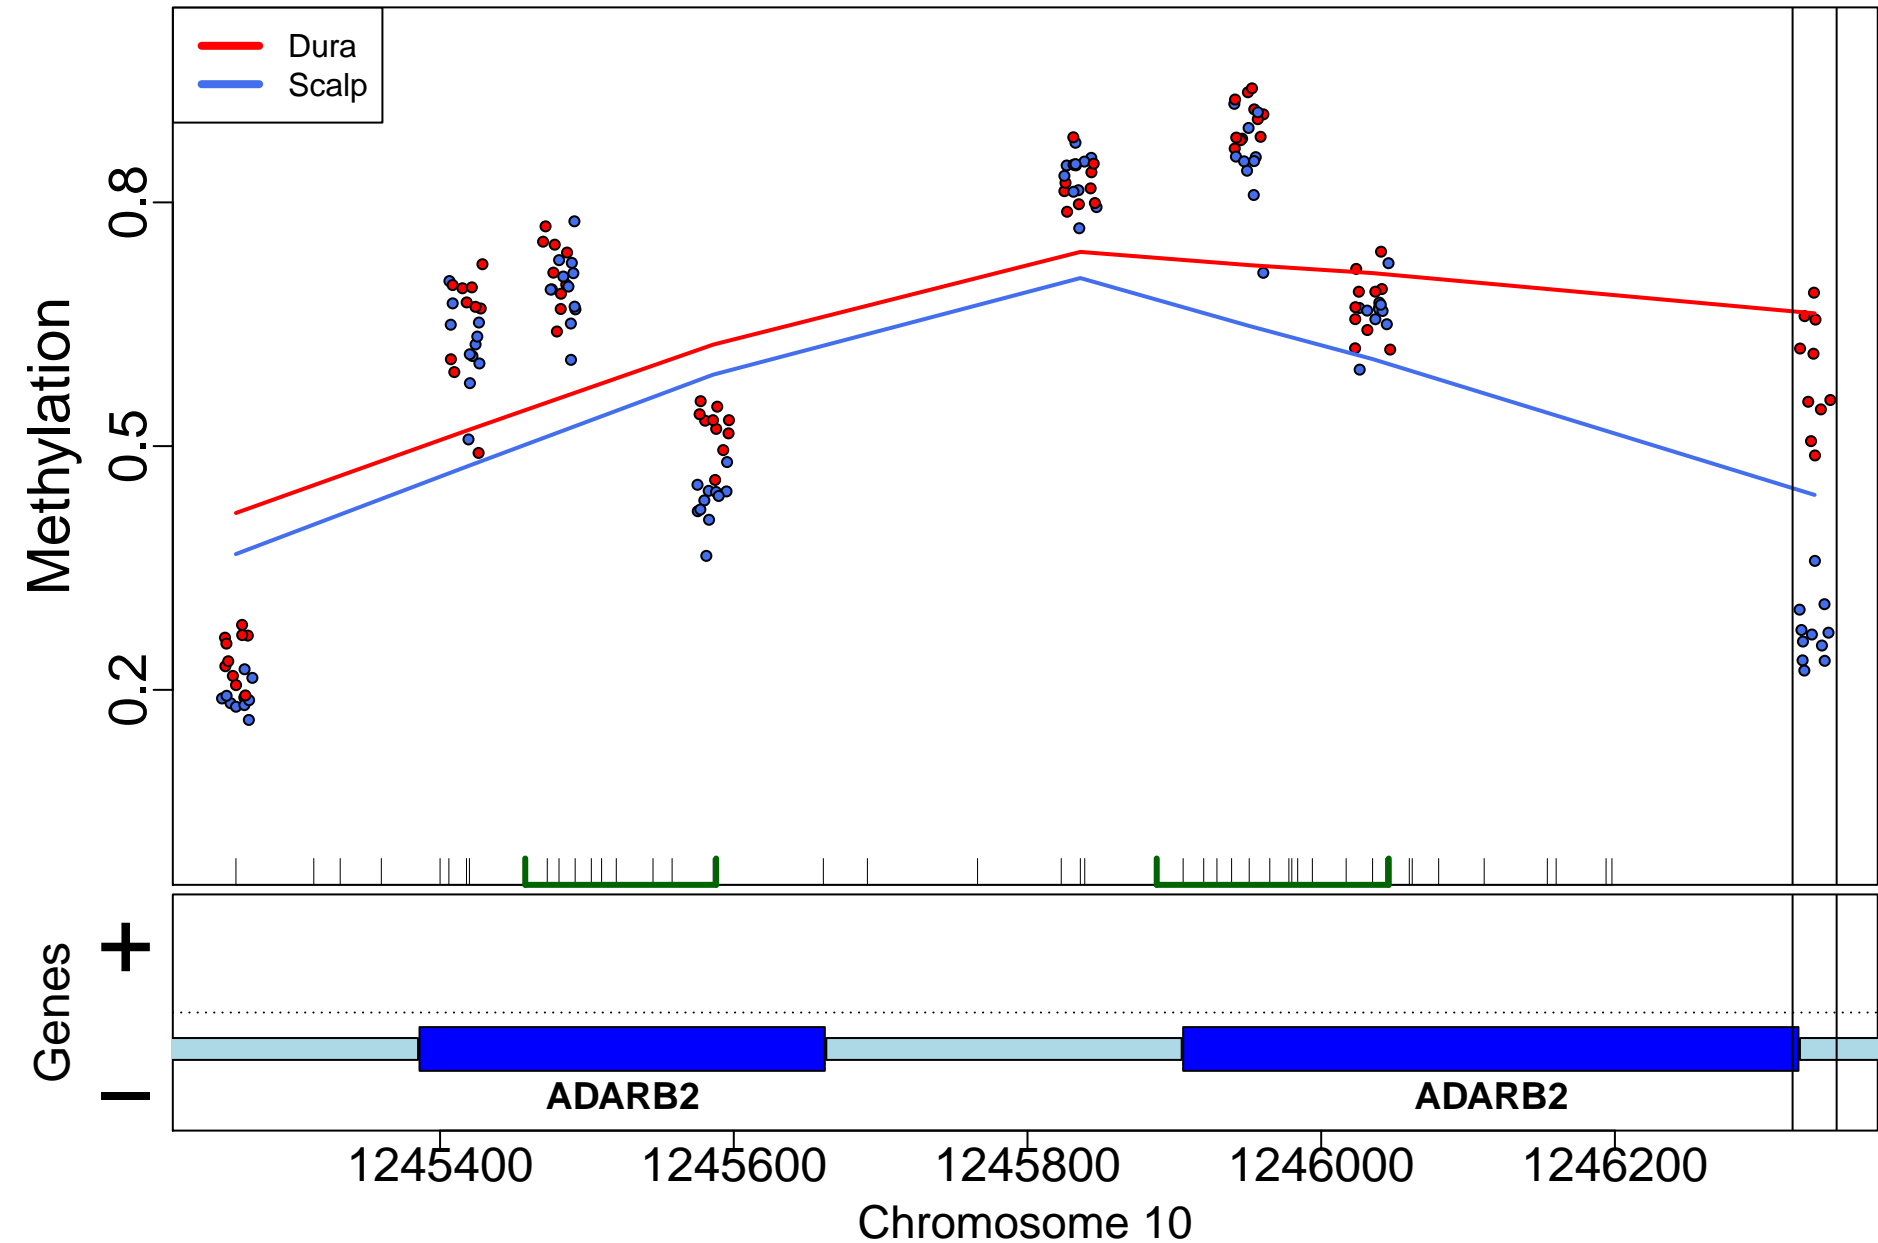

DHRS7C; 523bp from tss:promoter

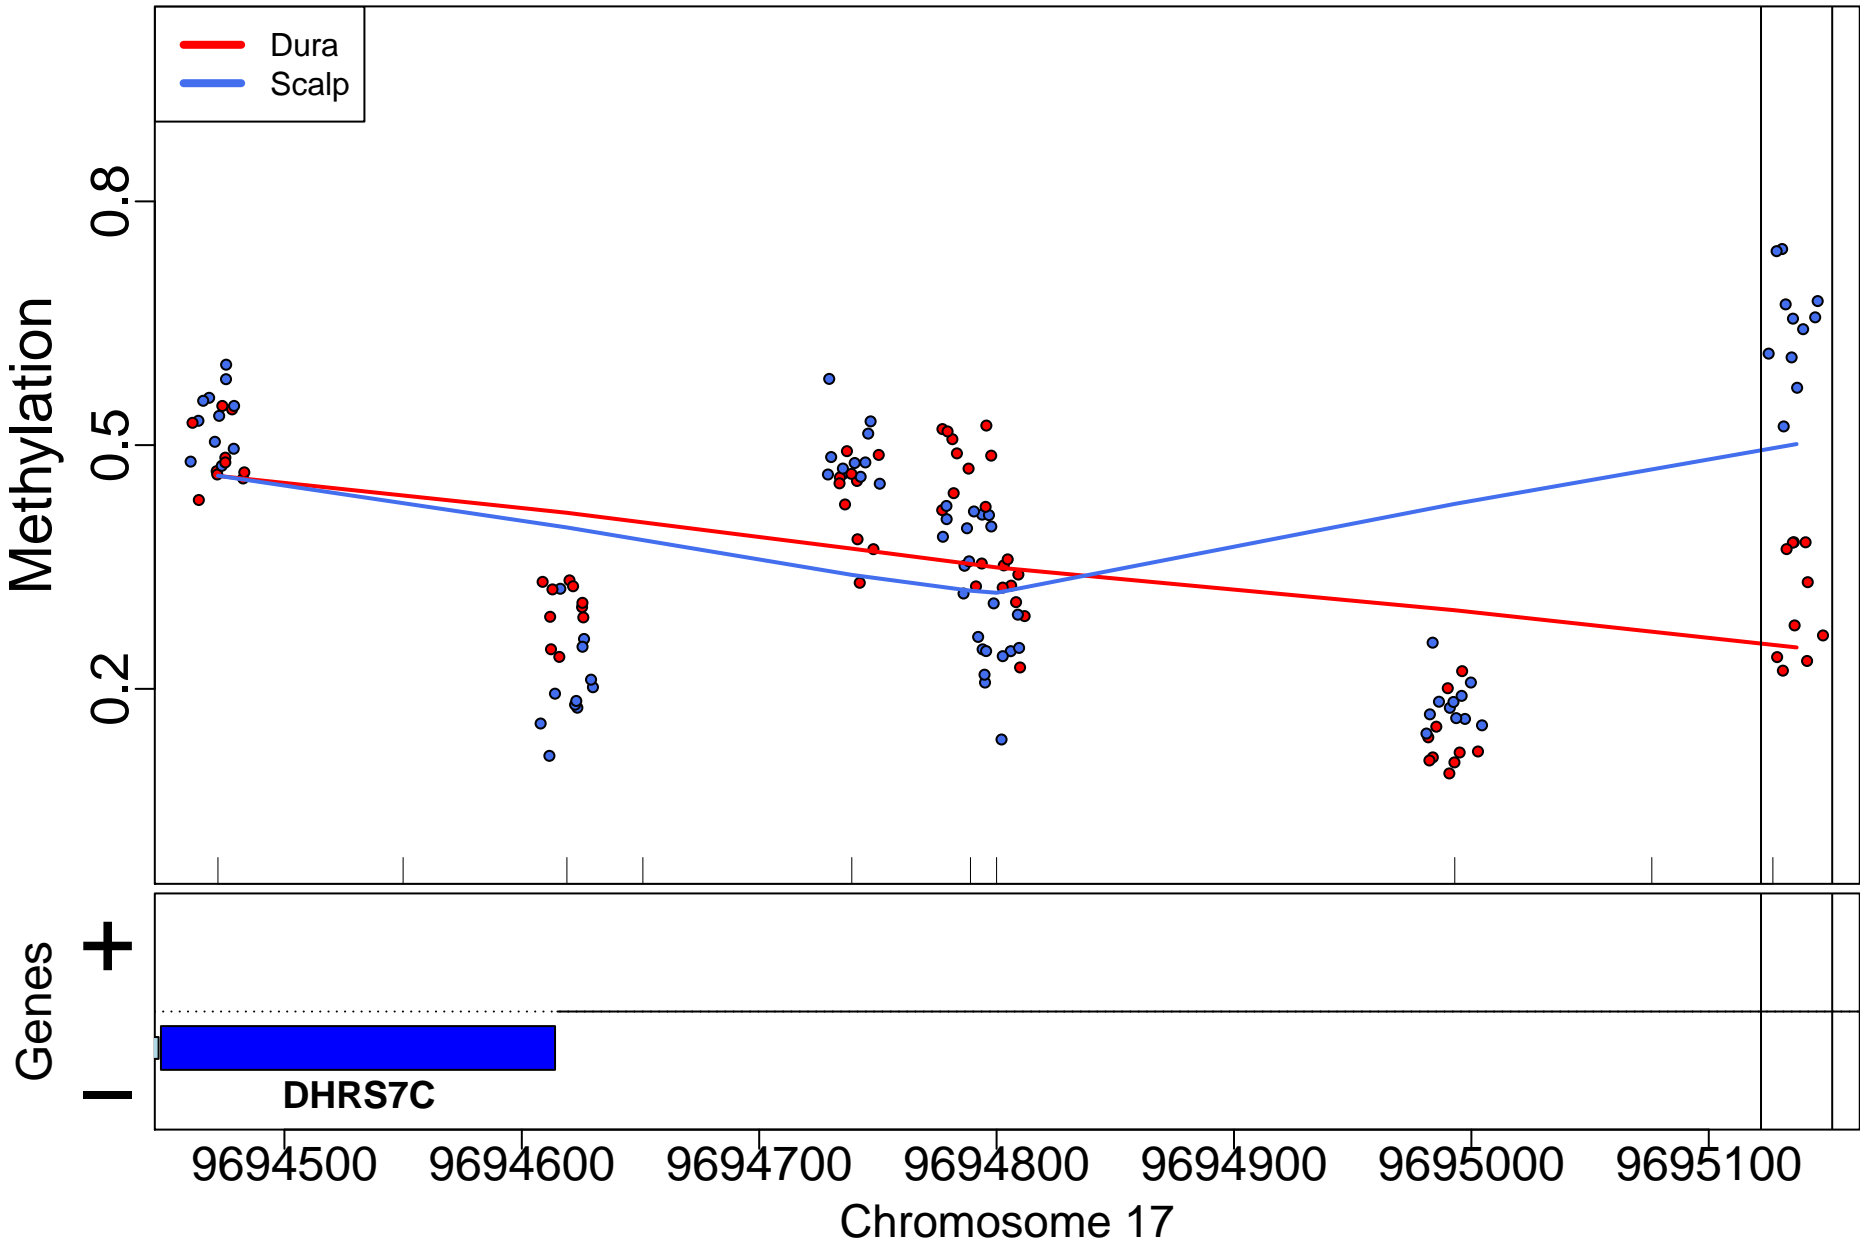

## DLX6-AS1; 0bp from tss:NA

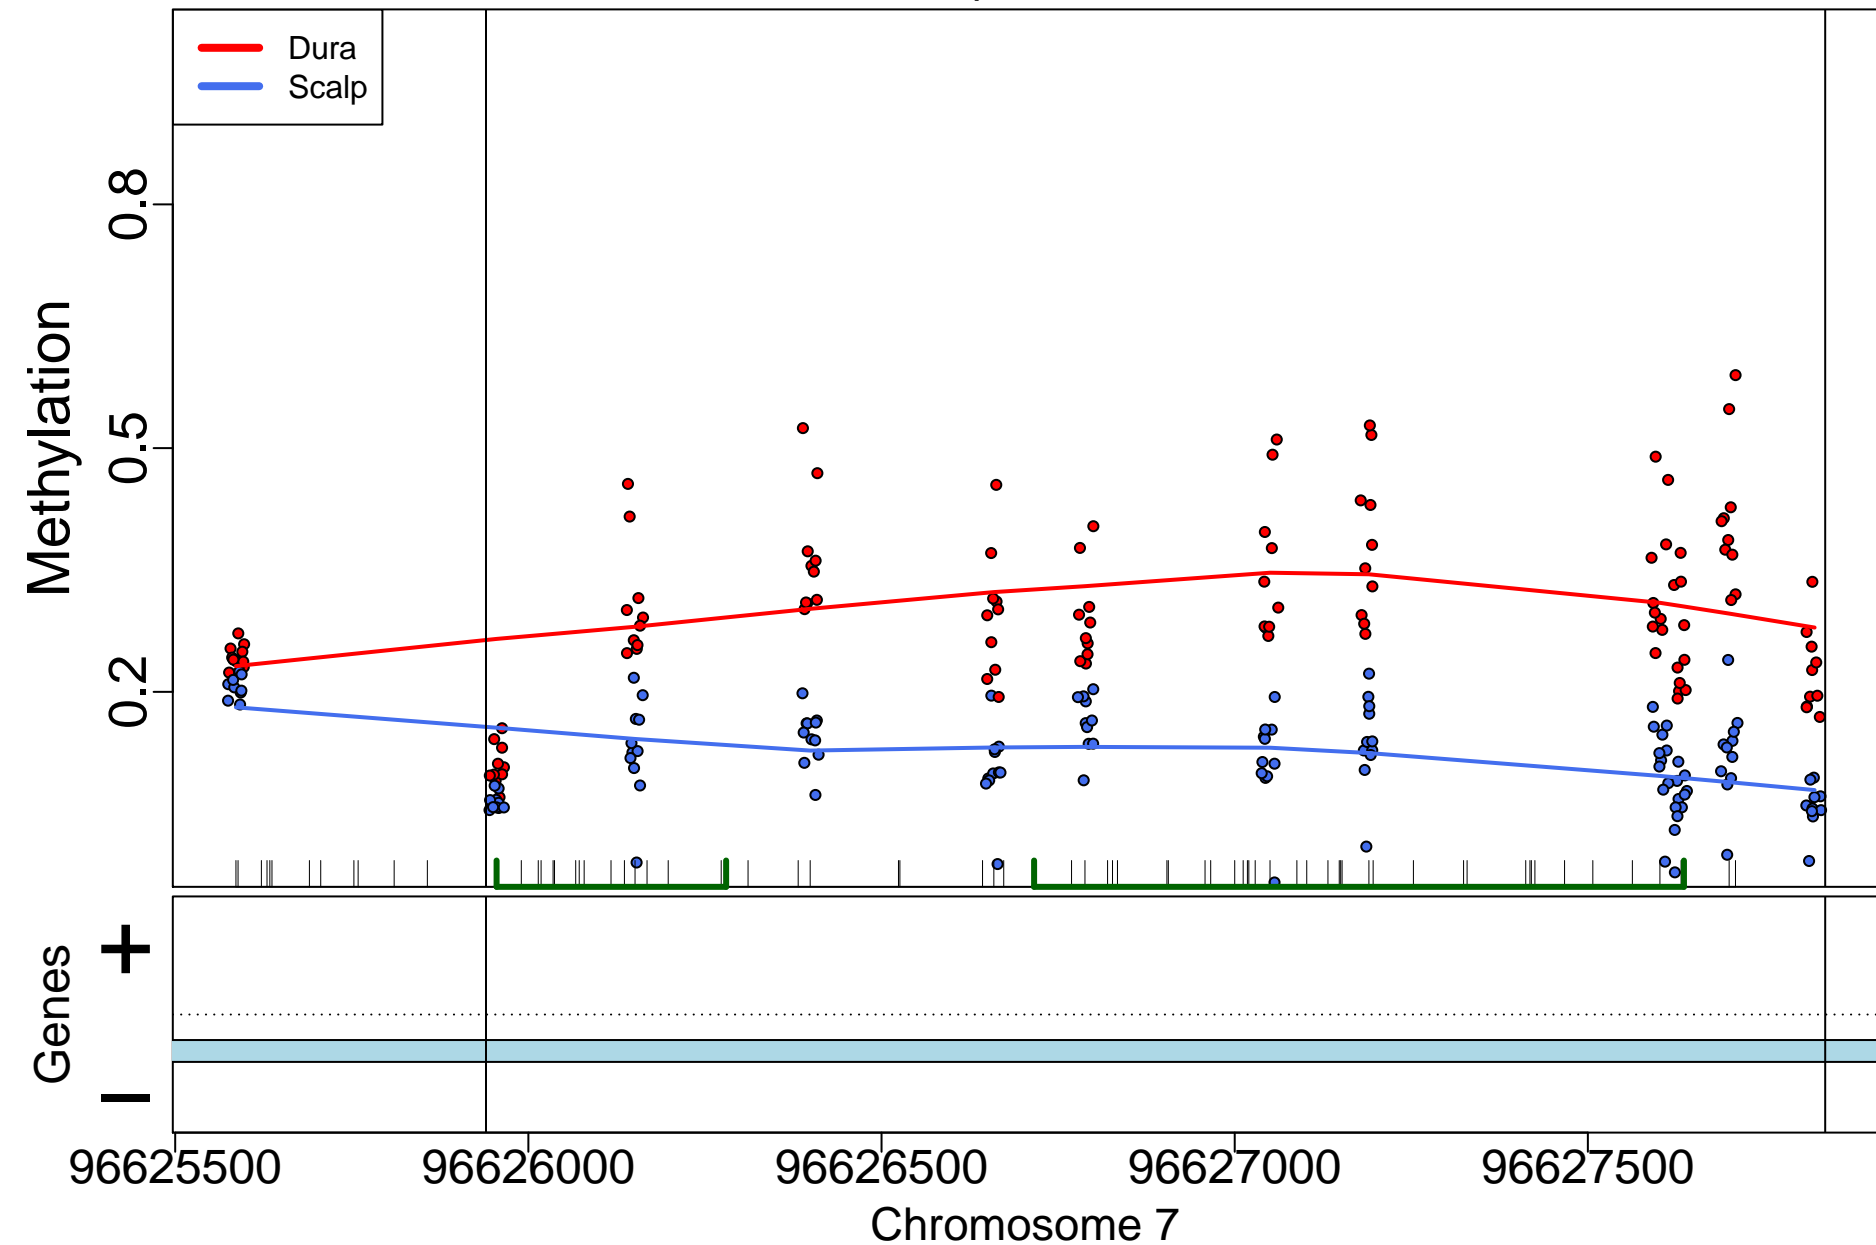

# STX18-AS1; 0bp from tss:NA

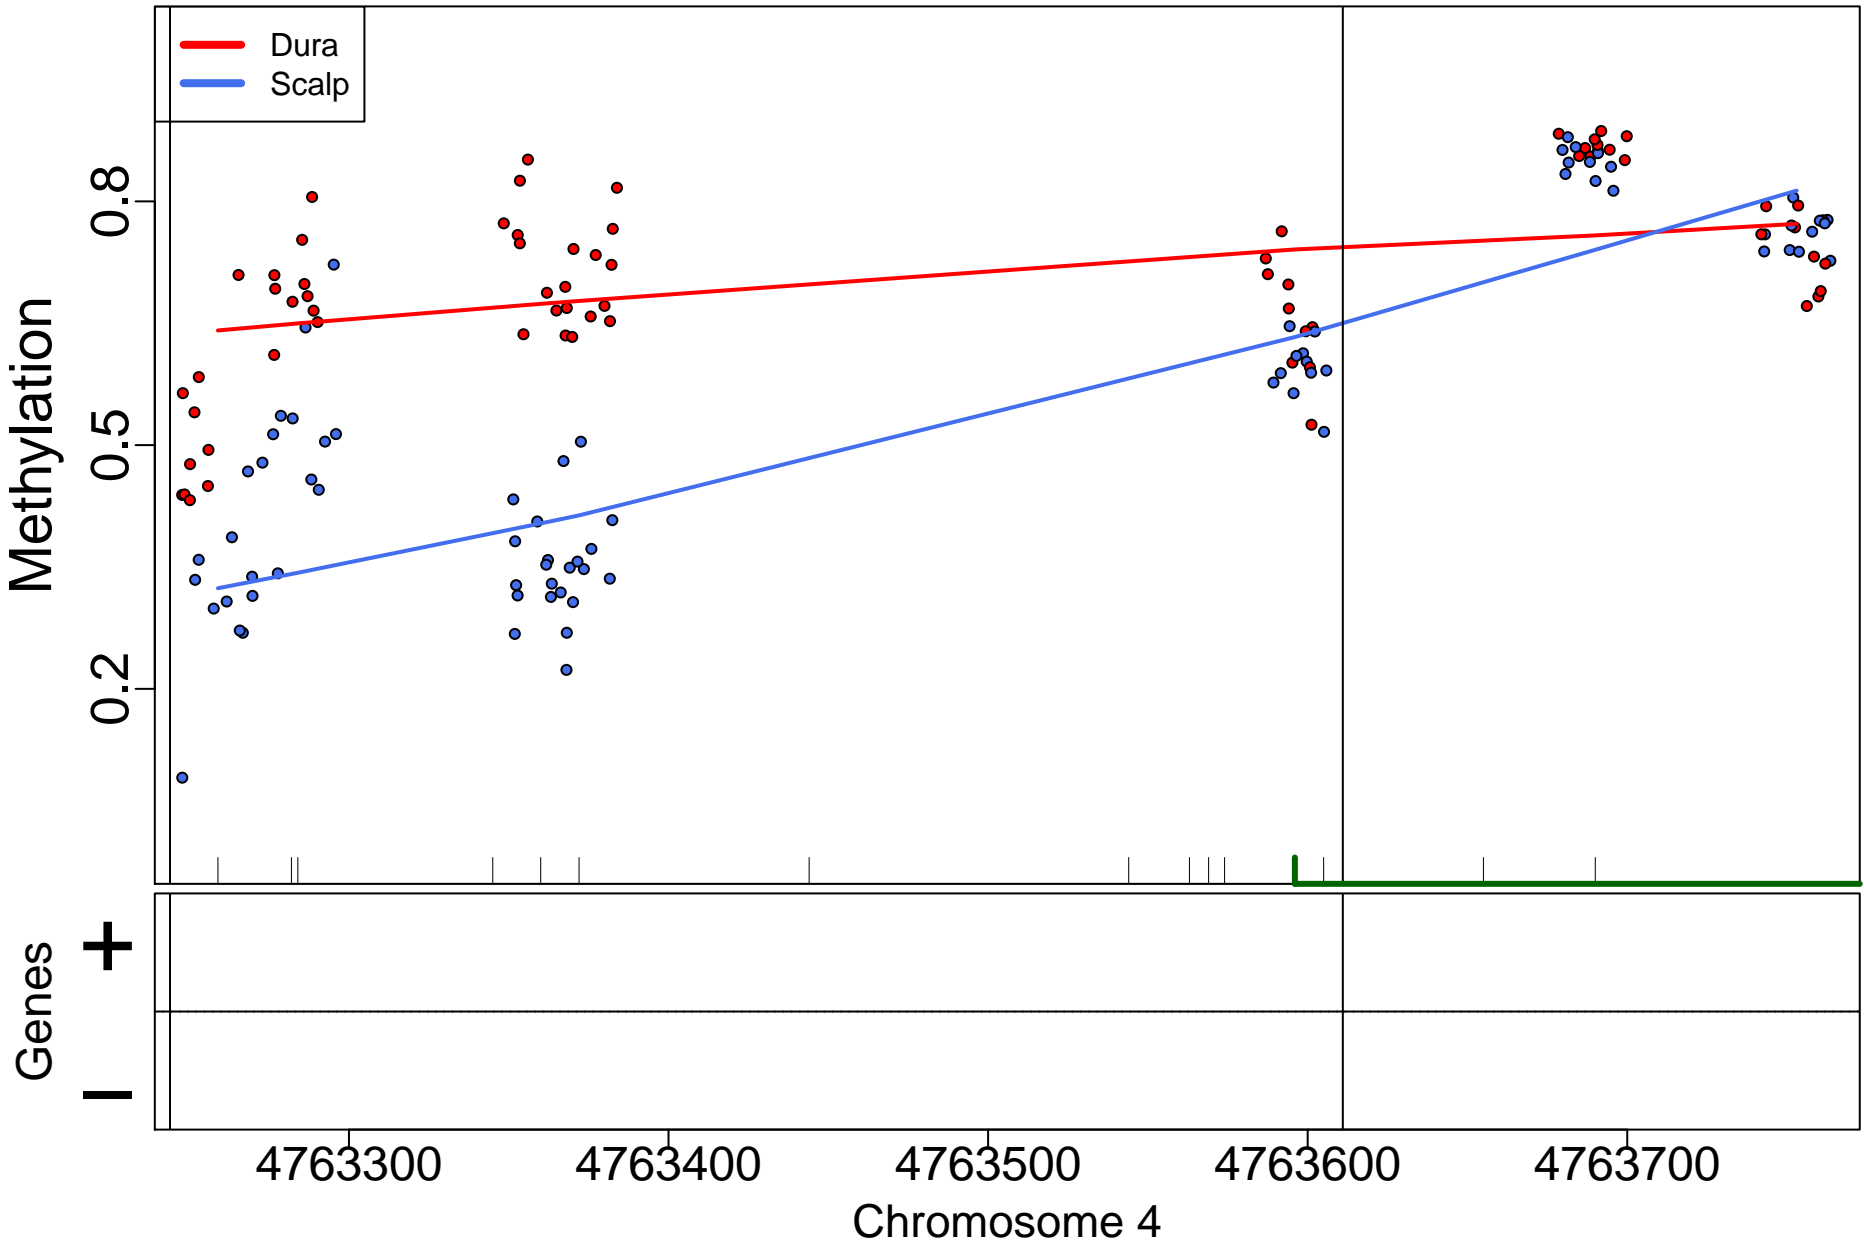



EN2; 7407bp from tss:upstream

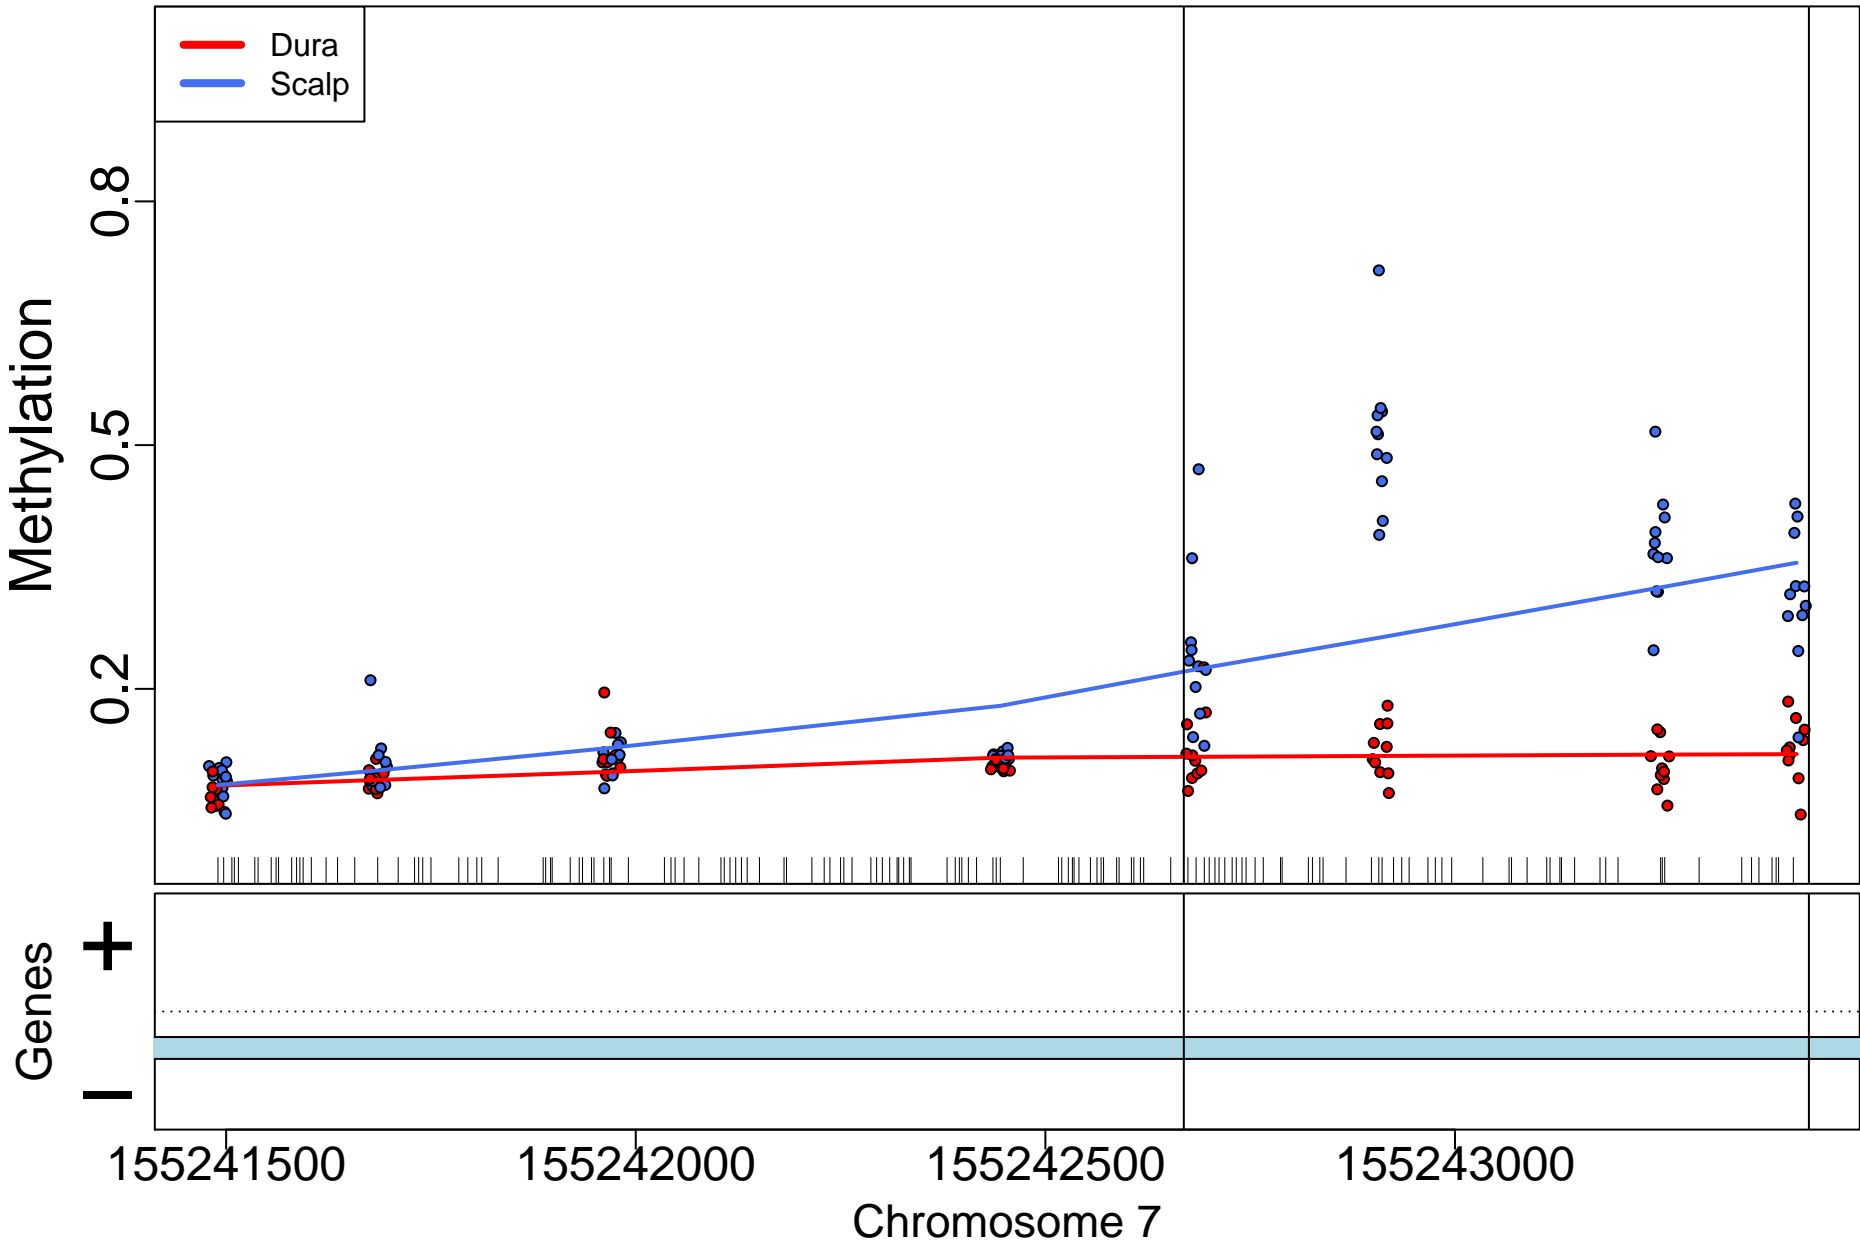

PITX2; 11844bp from tss:downstream

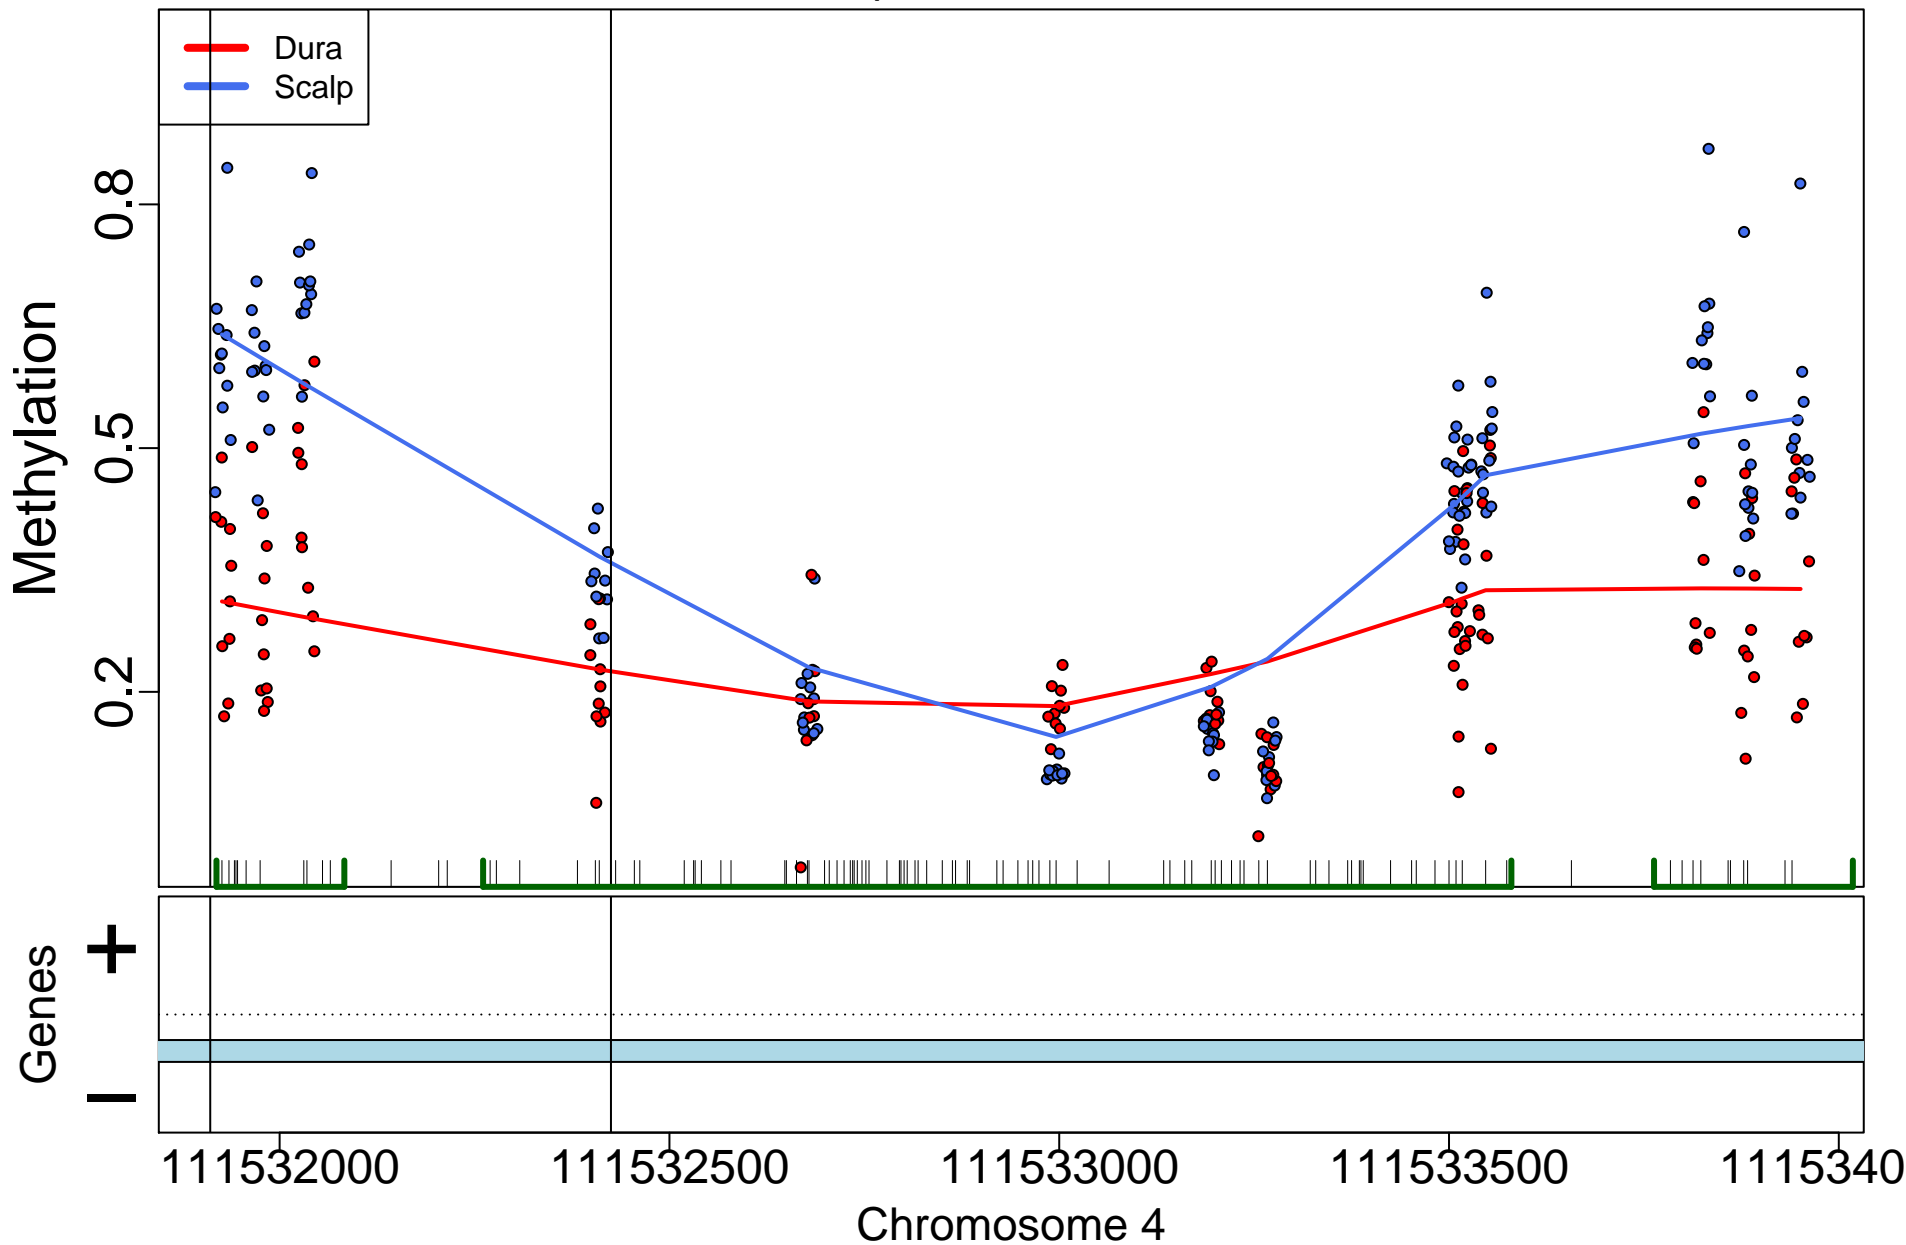

SOX9; 976bp from tss:promoter

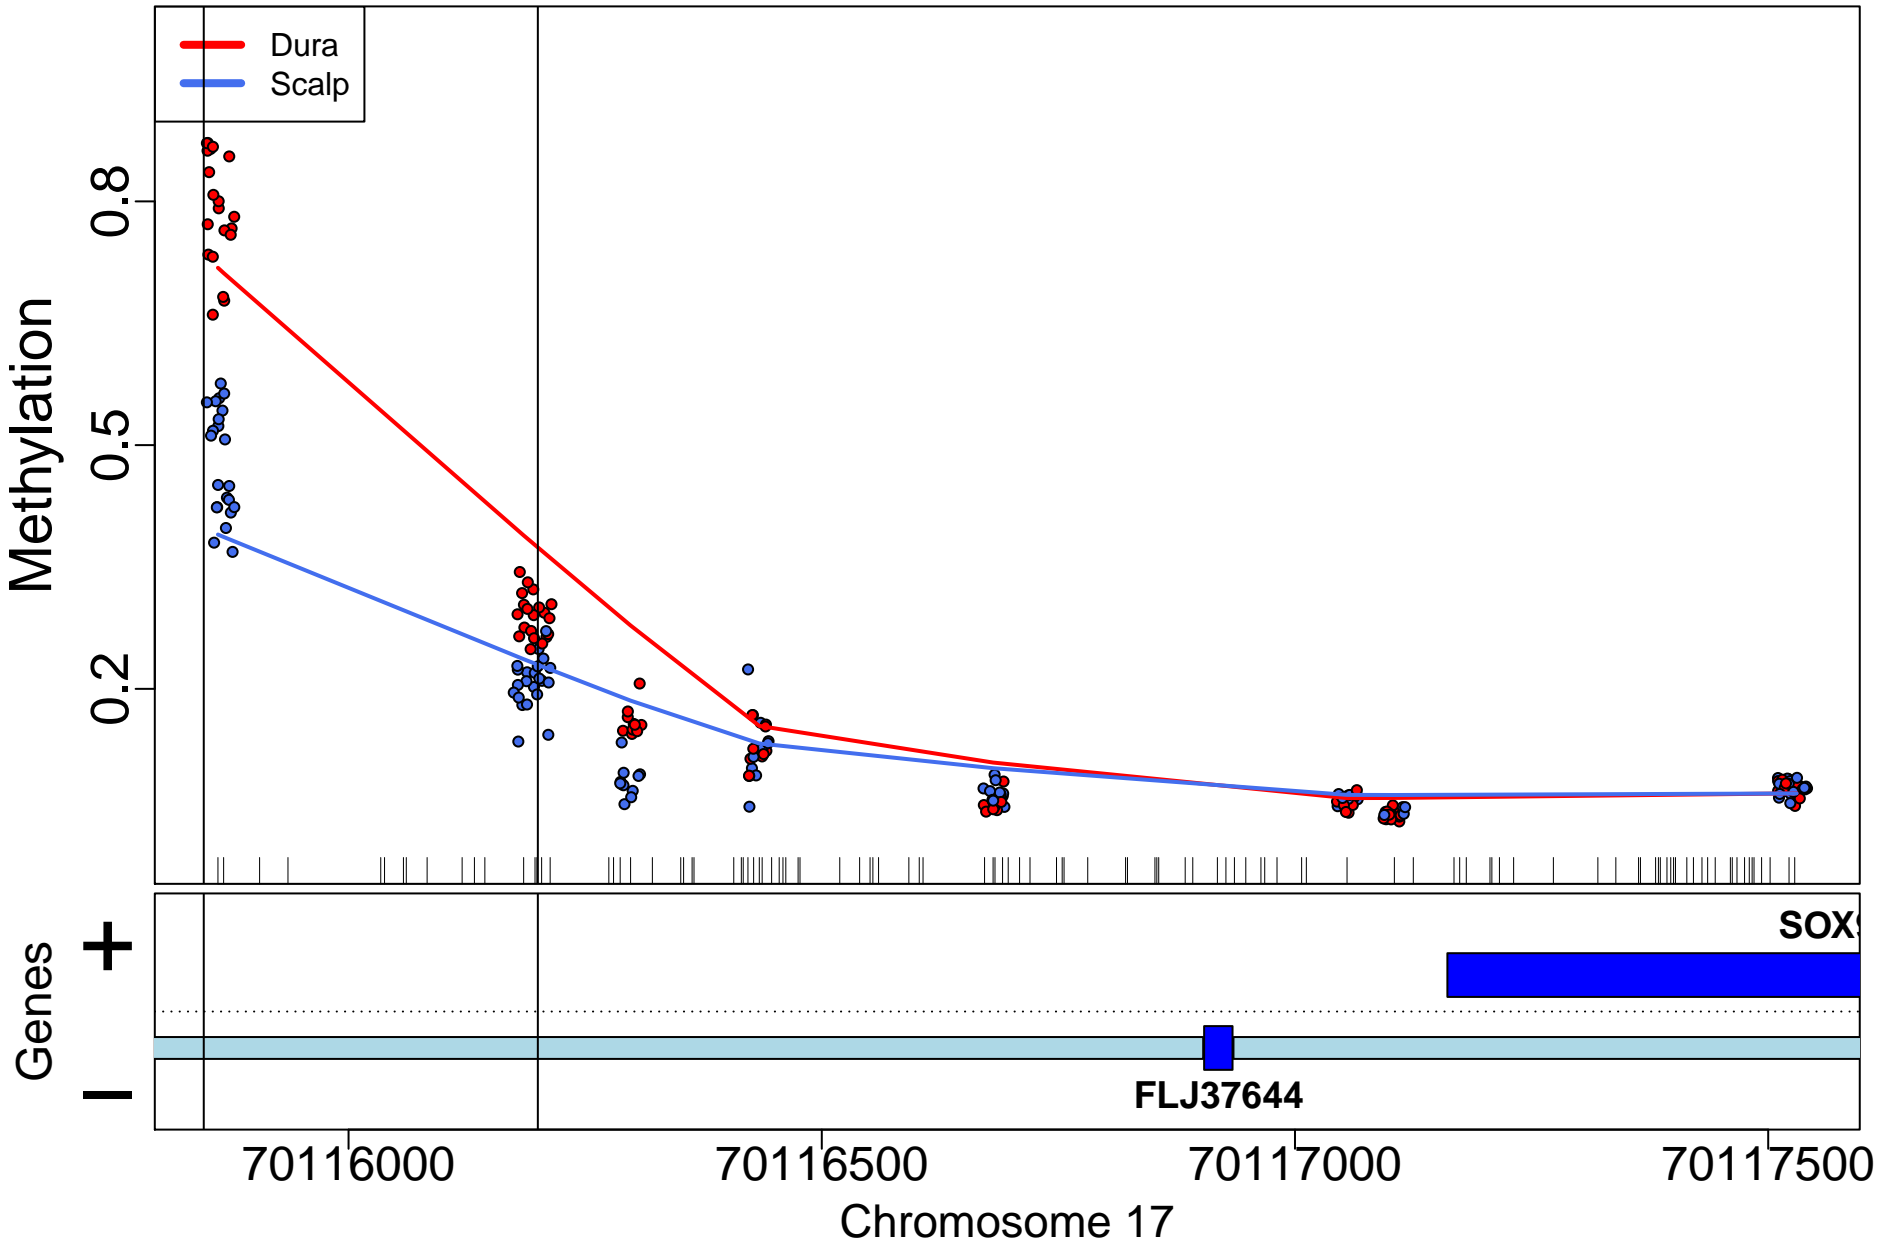

TEKT3; 439bp from tss:inside intron

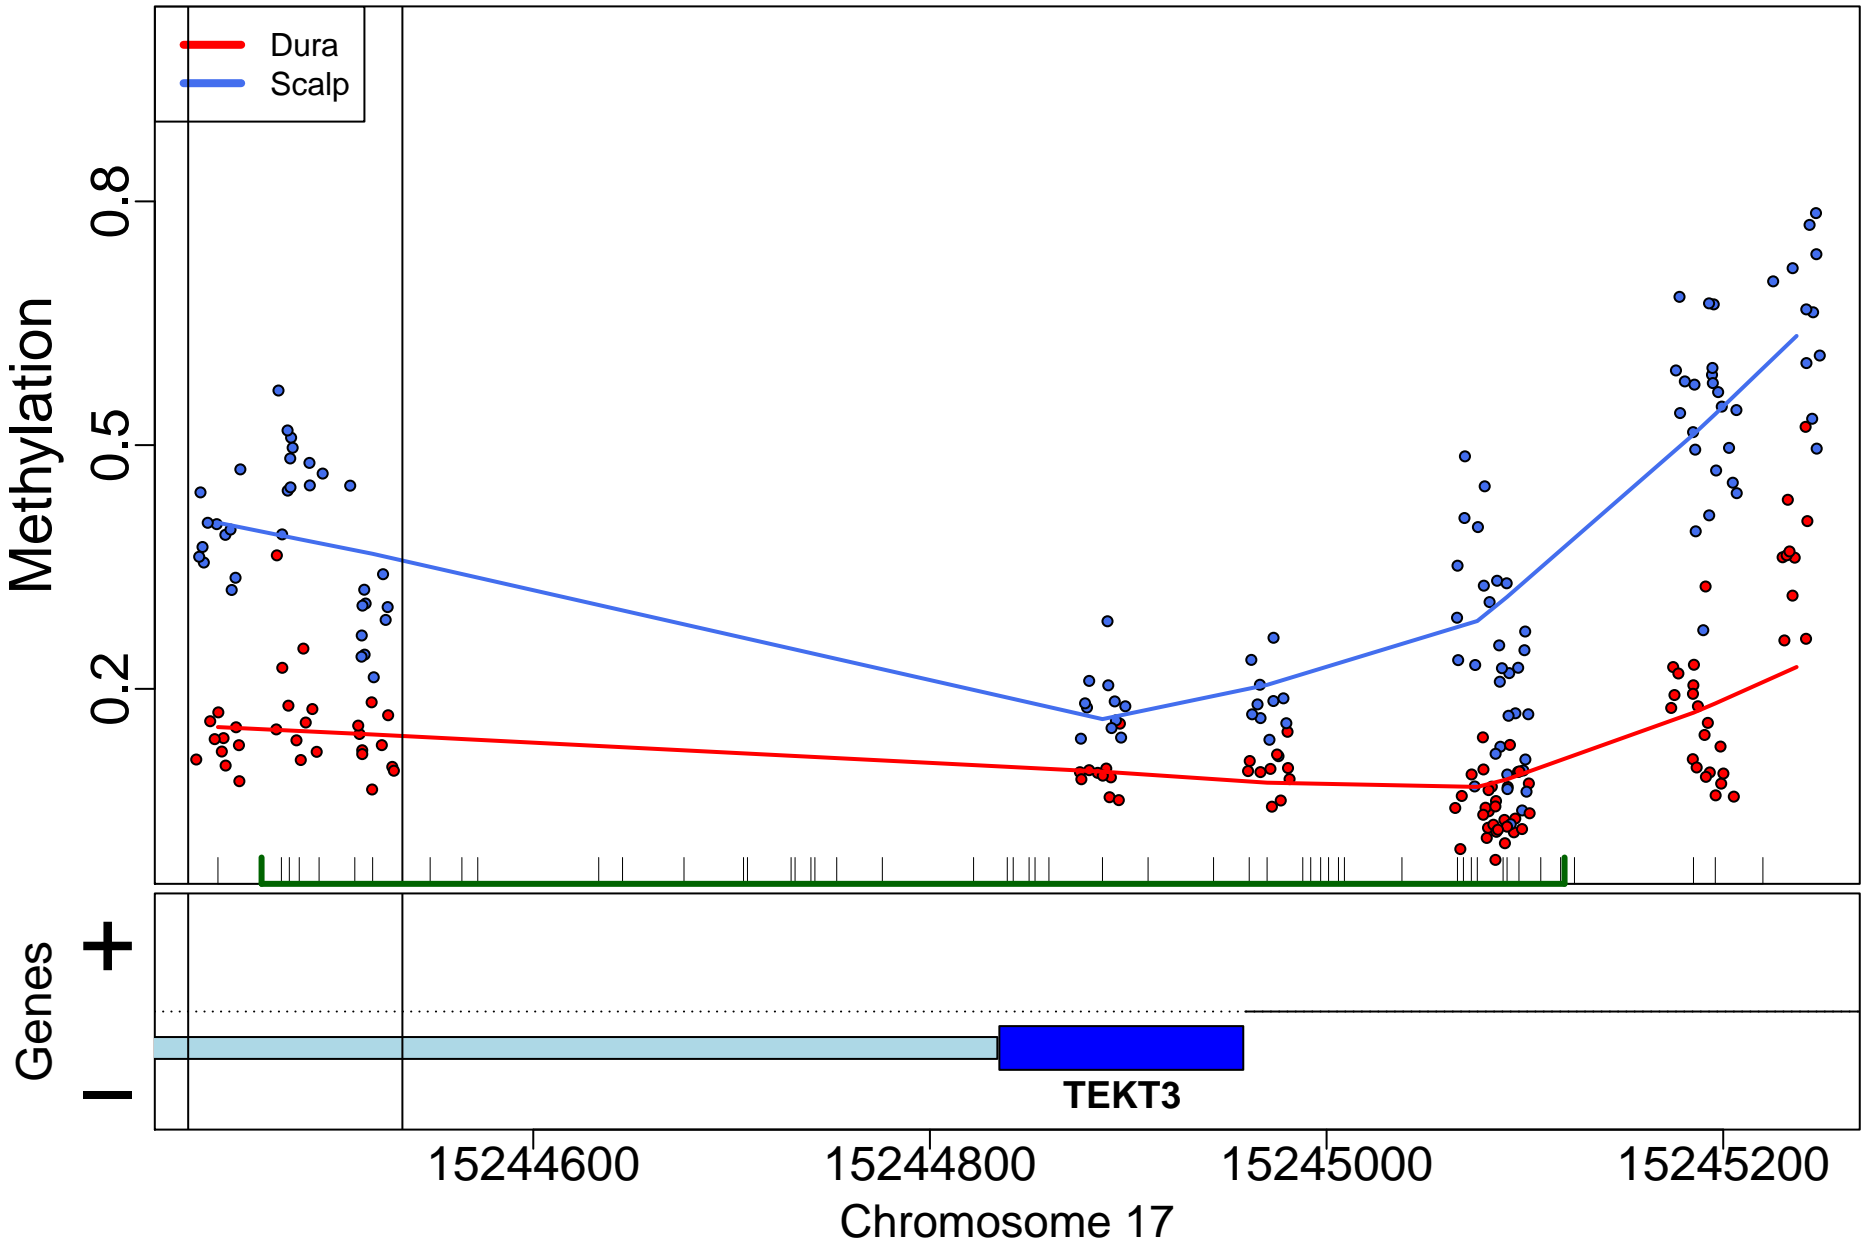

PXDNL; 0bp from tss:overlaps 5'

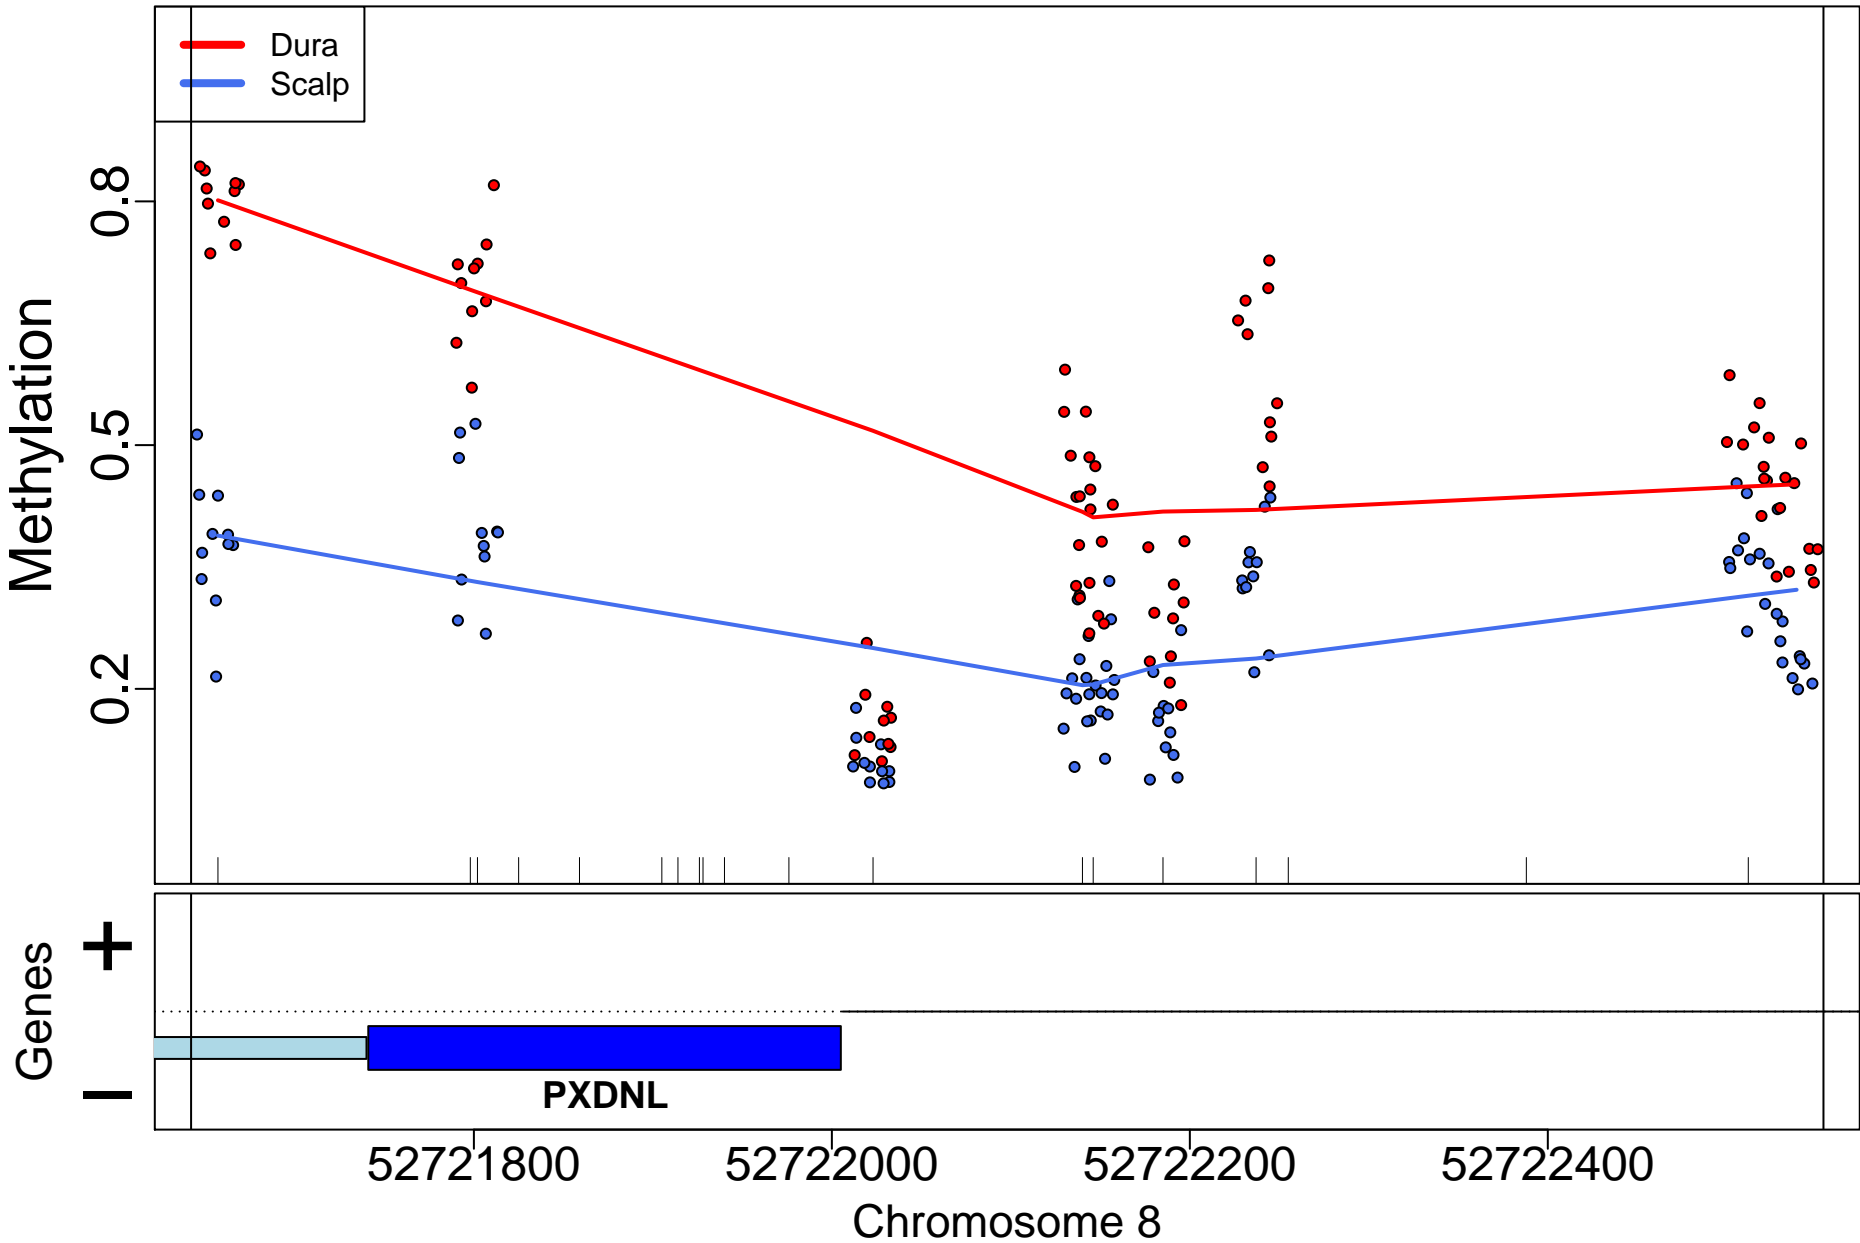

SLC44A4; 7798bp from tss:covers exon(s)

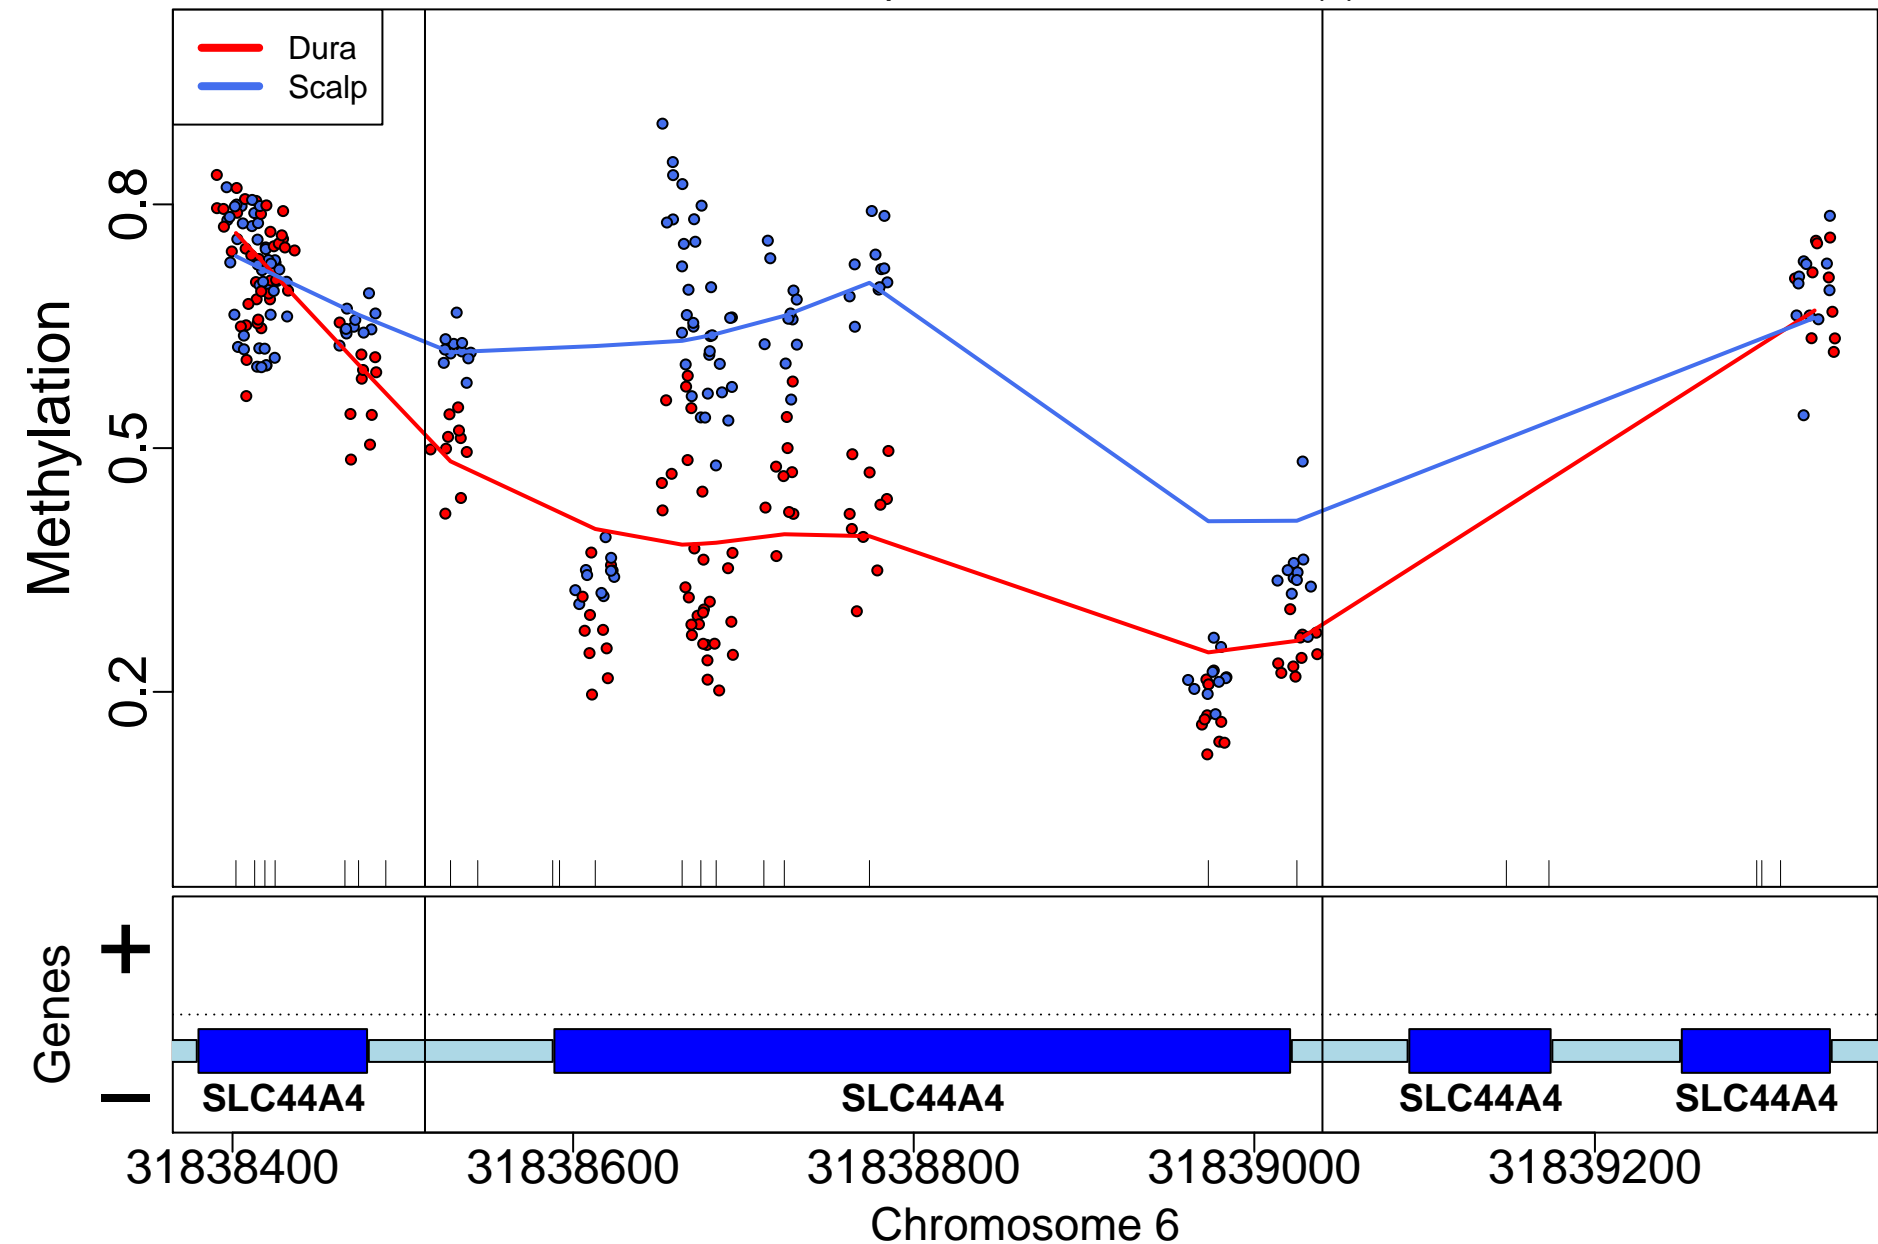

LRR15; 340bp from tss:inside intron

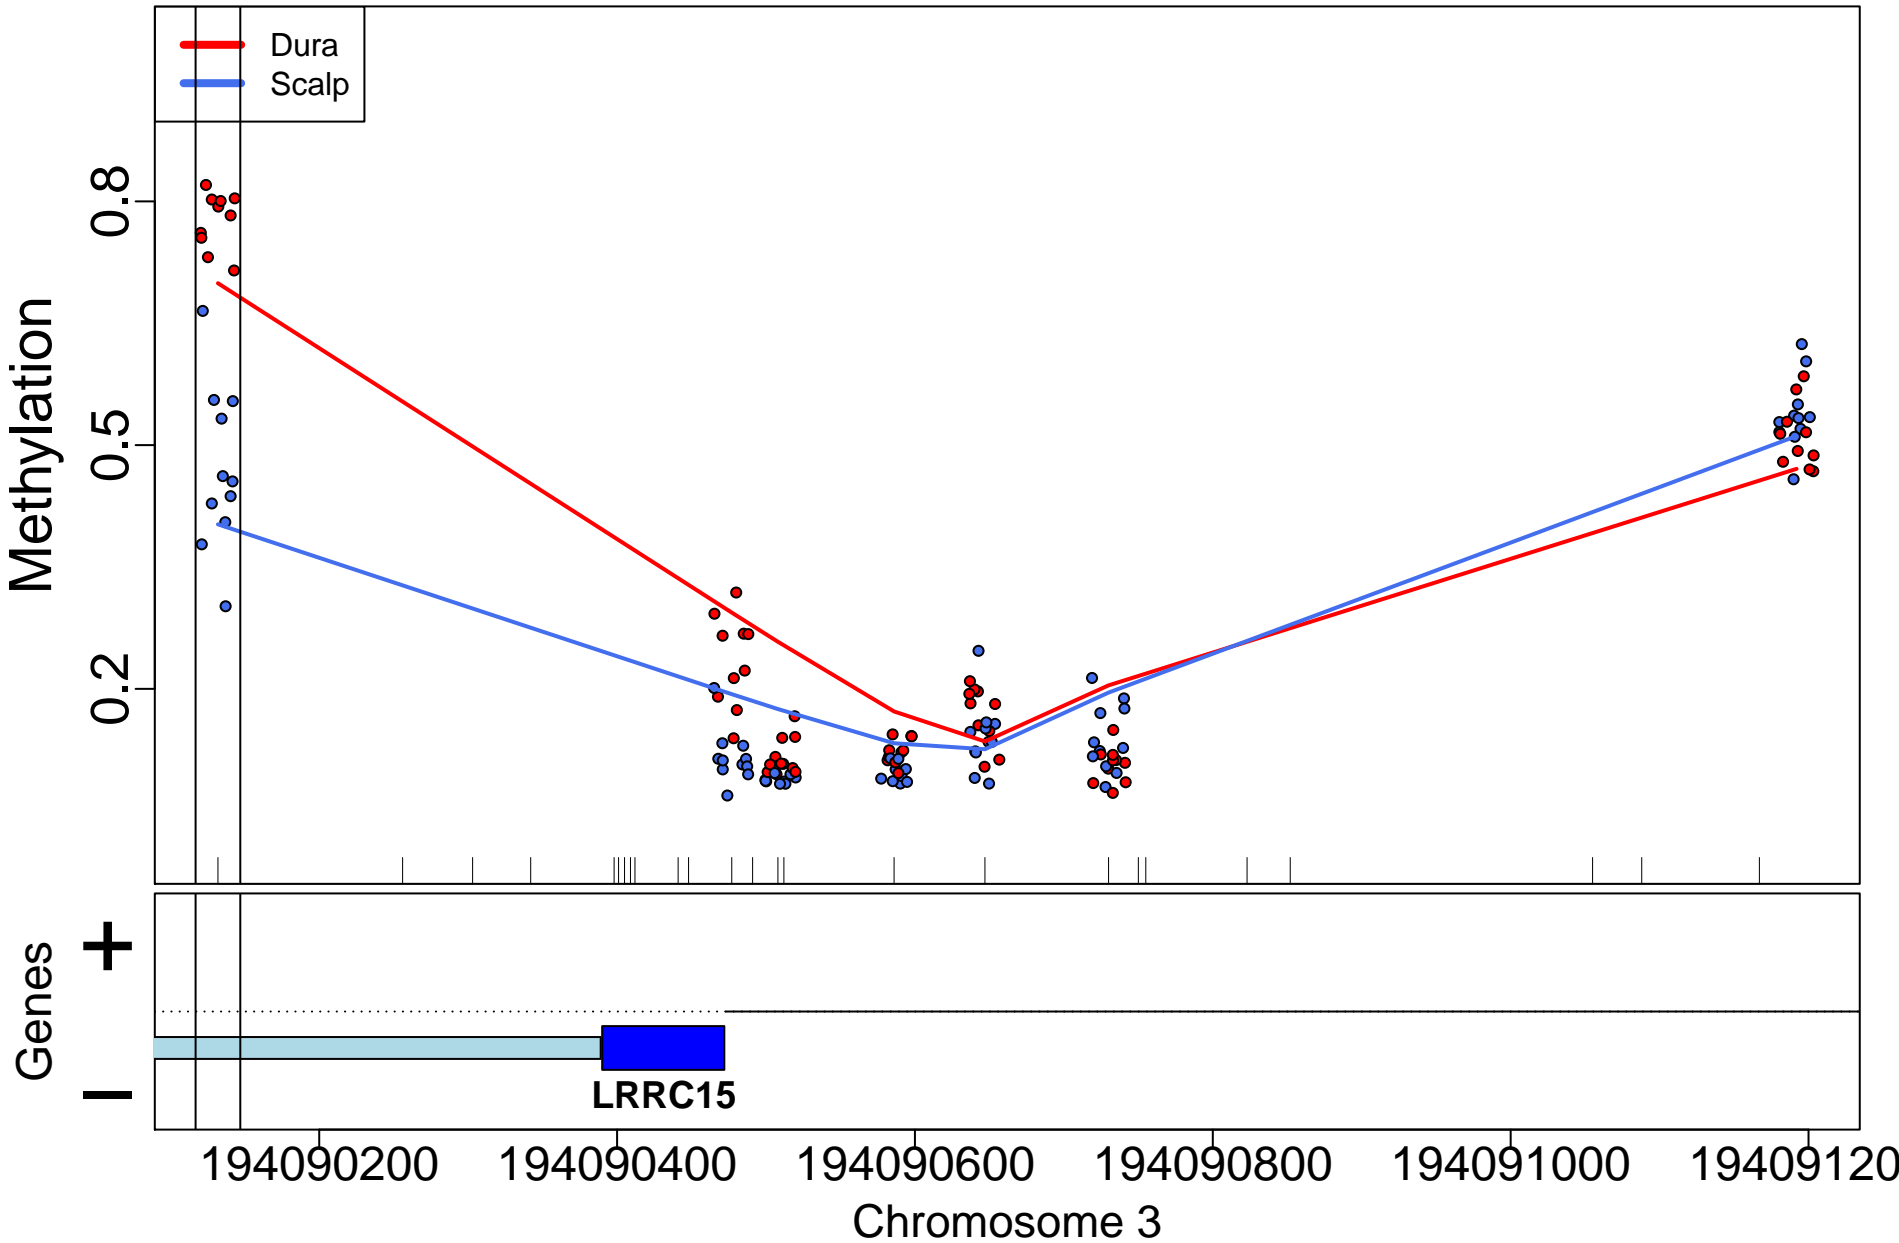

SEC16A; 43404bp from tss:inside exon

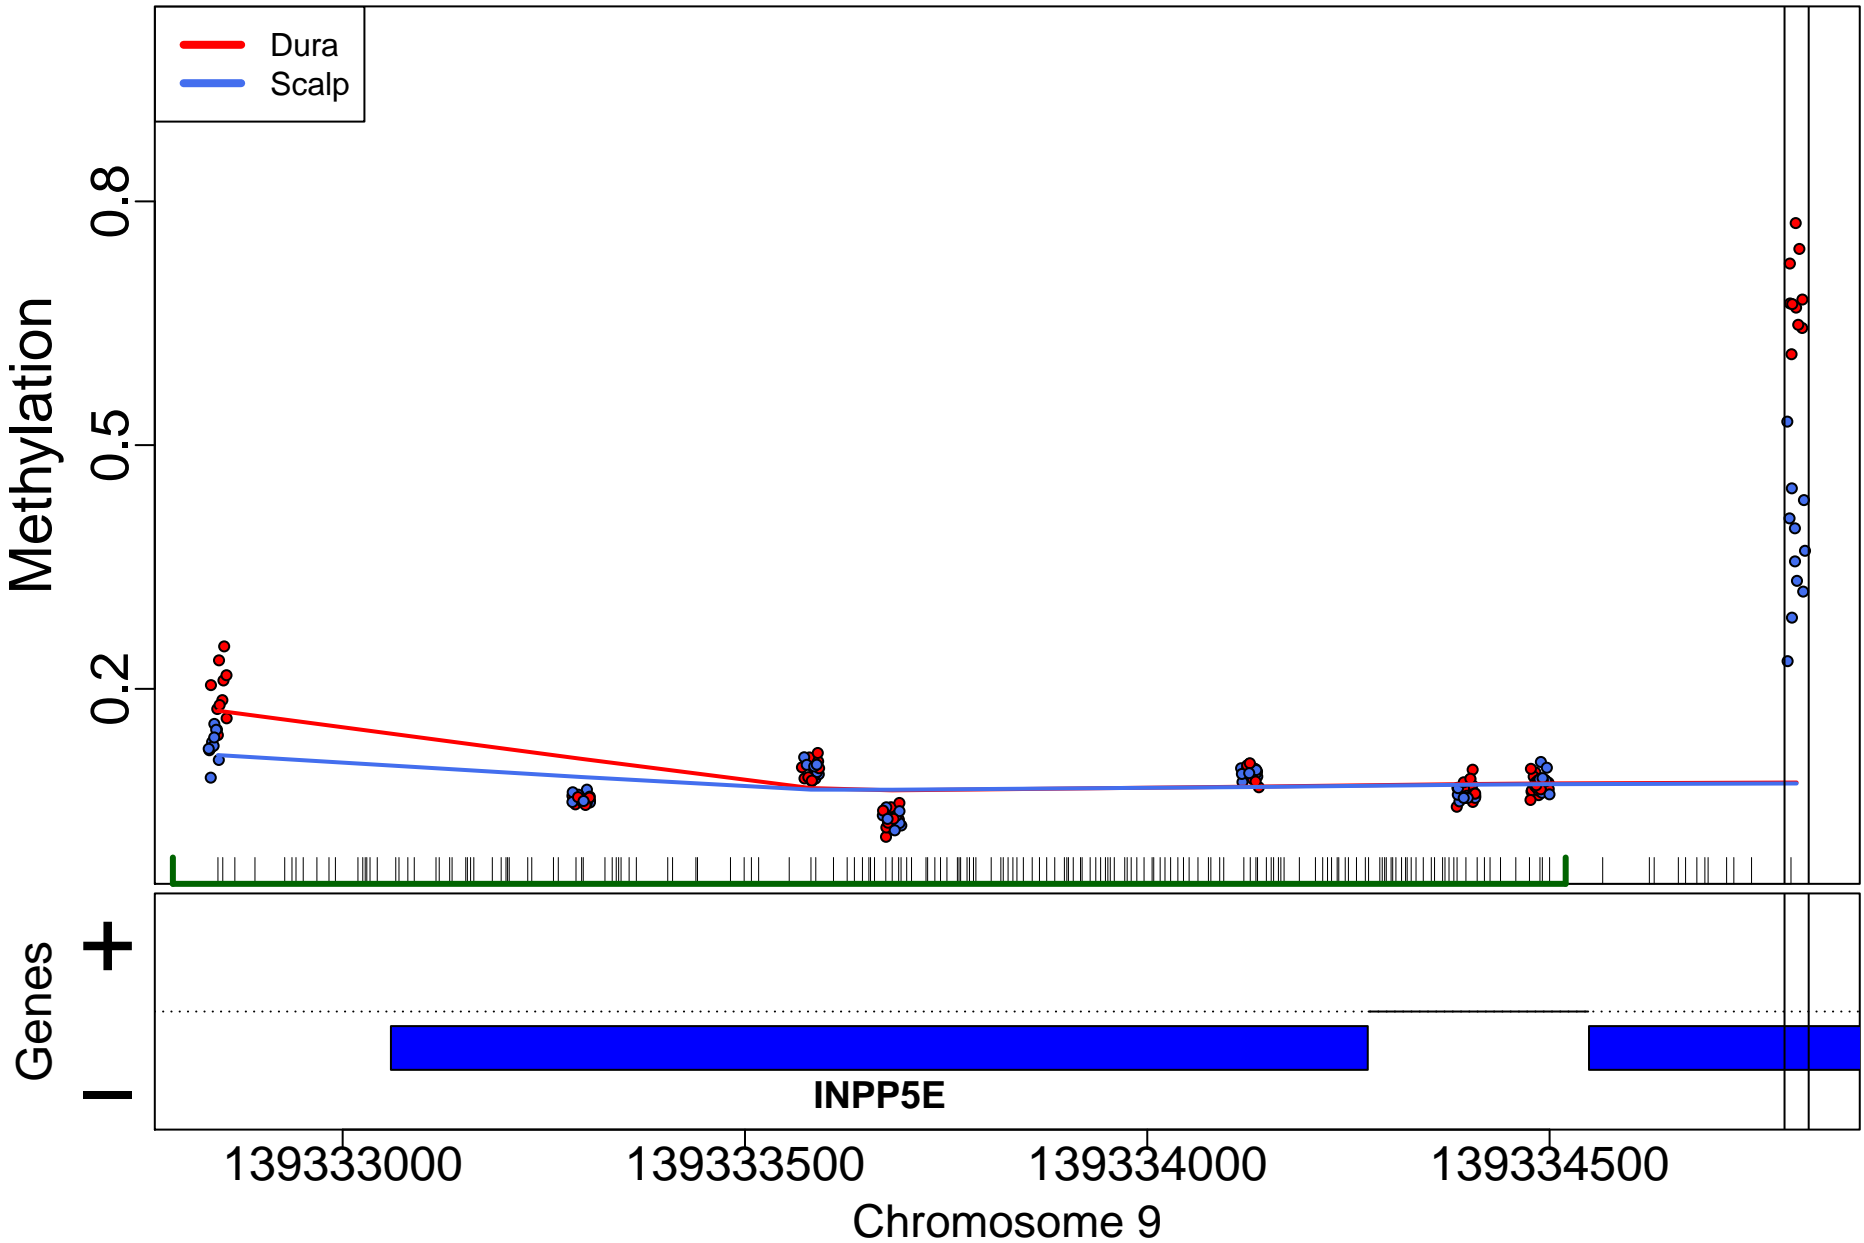



## SH3PXD2A; 735bp from tss:inside intron

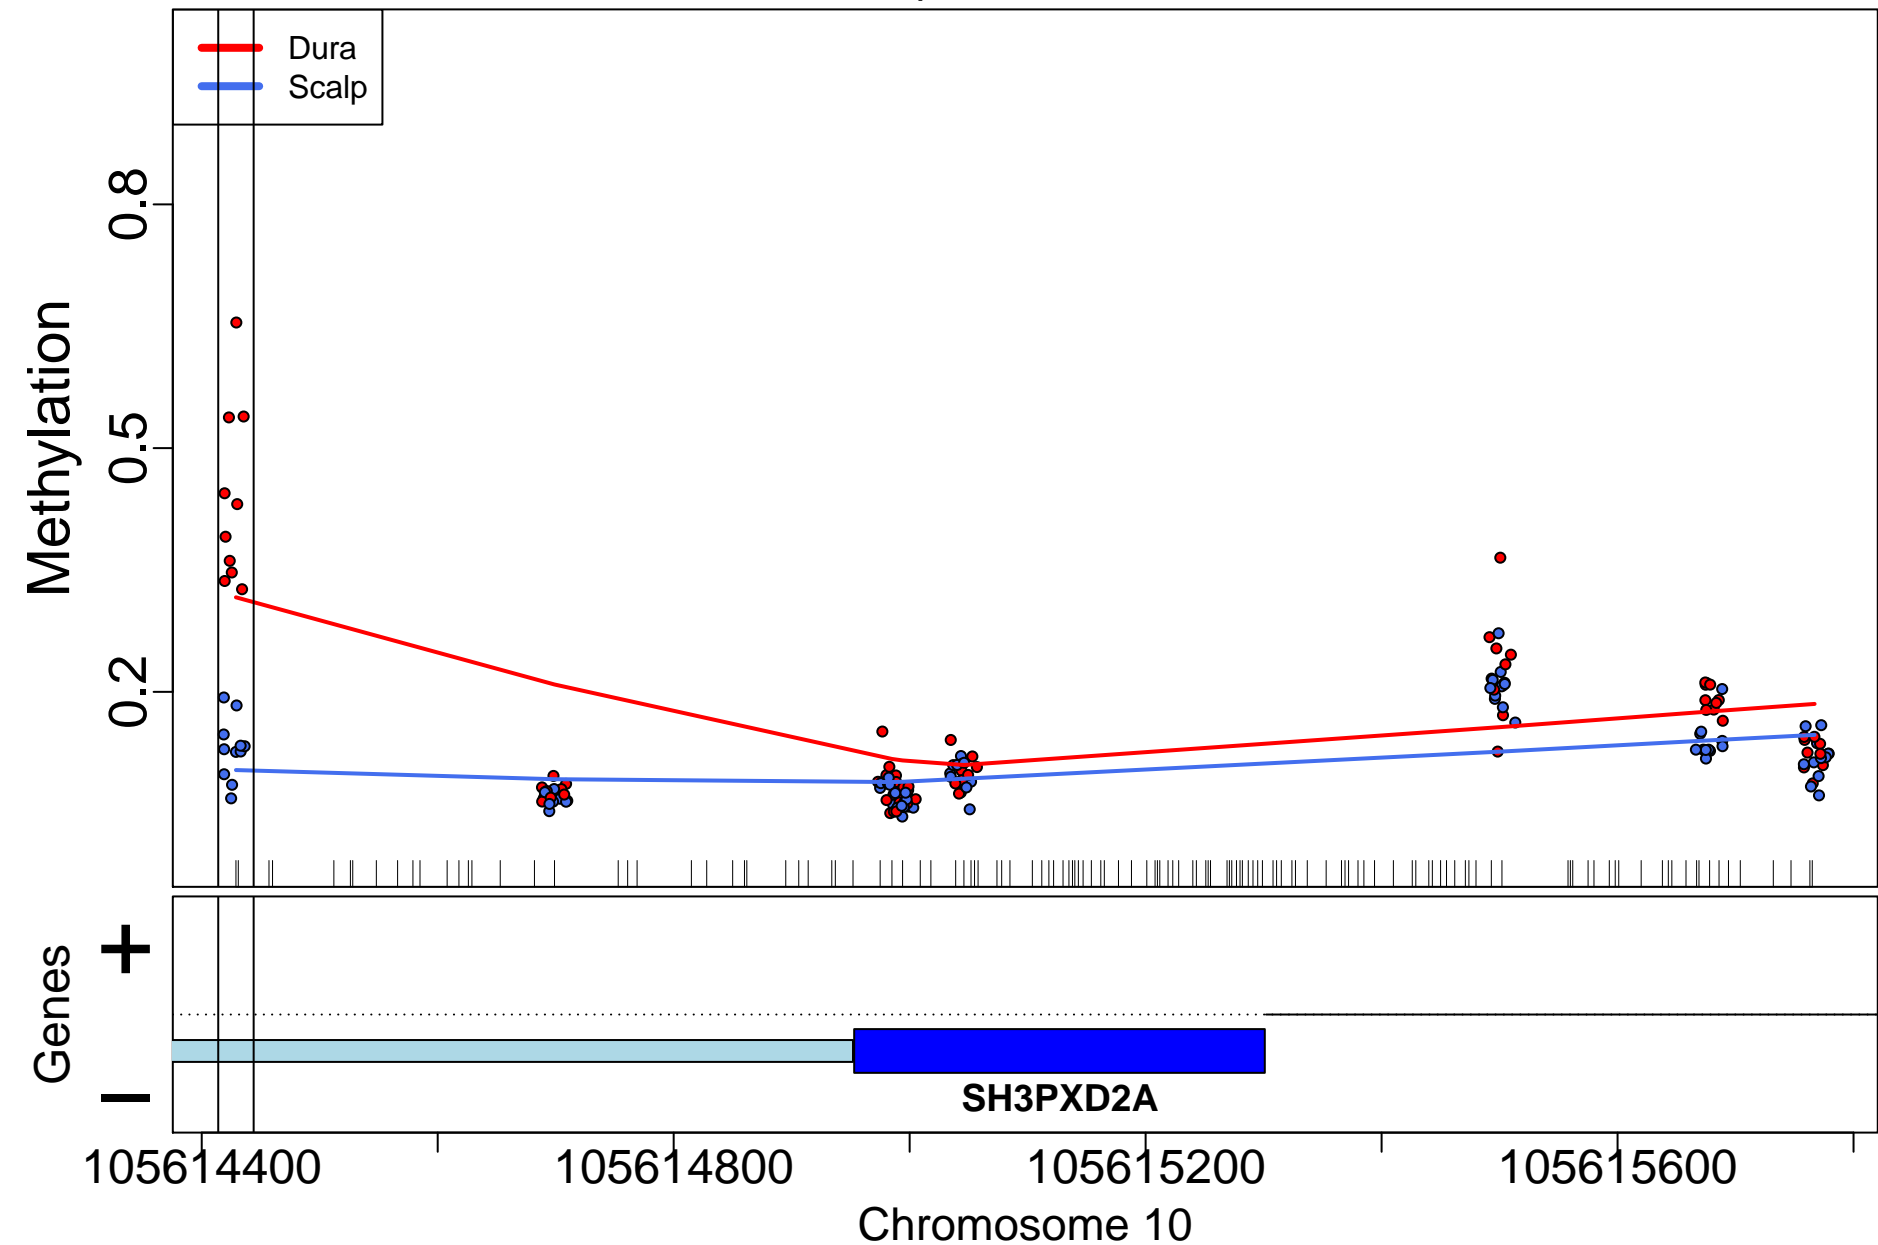

ID3; 1912bp from tss:close to 3'

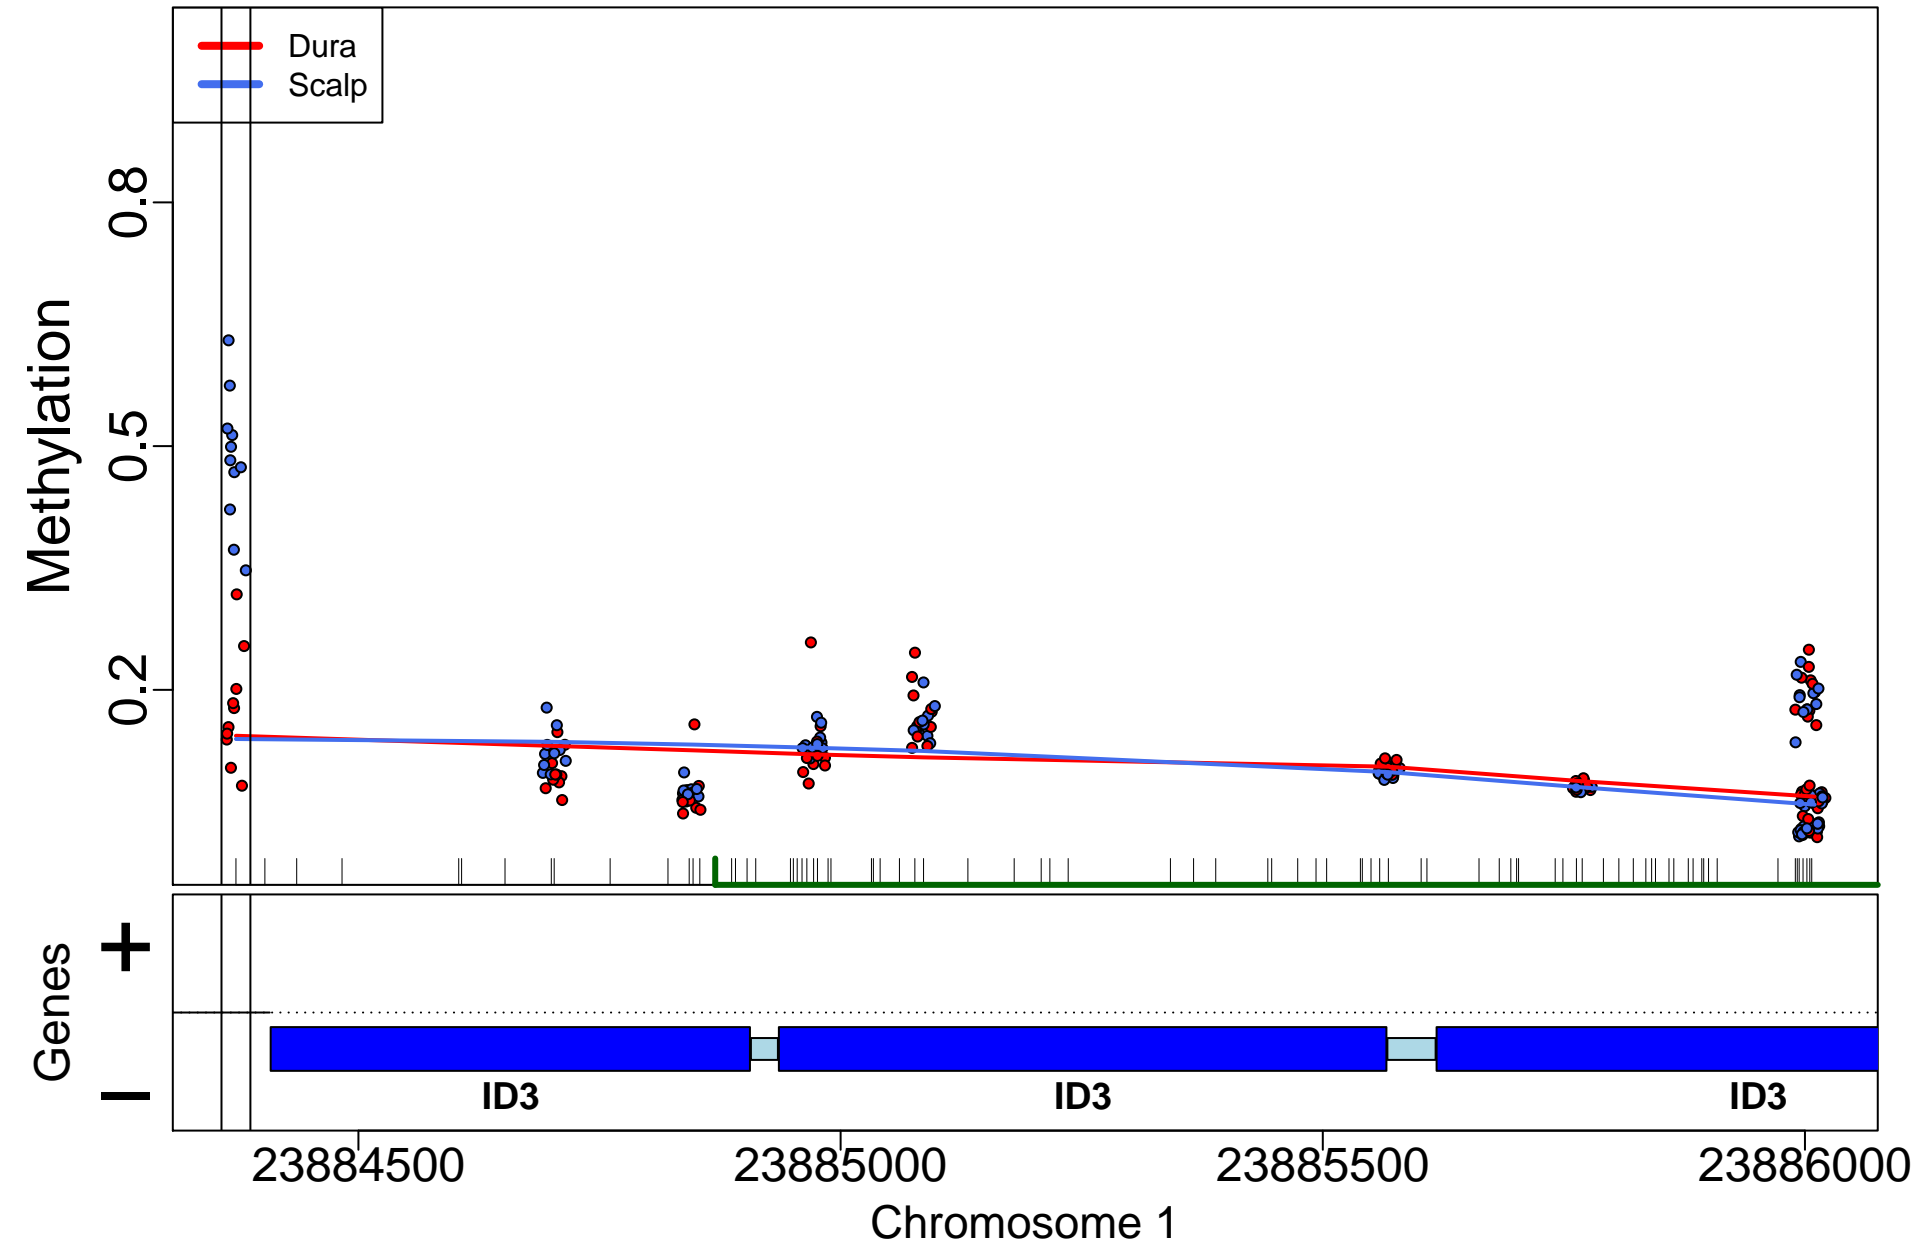

AATK; 39585bp from tss:overlaps exon downstream

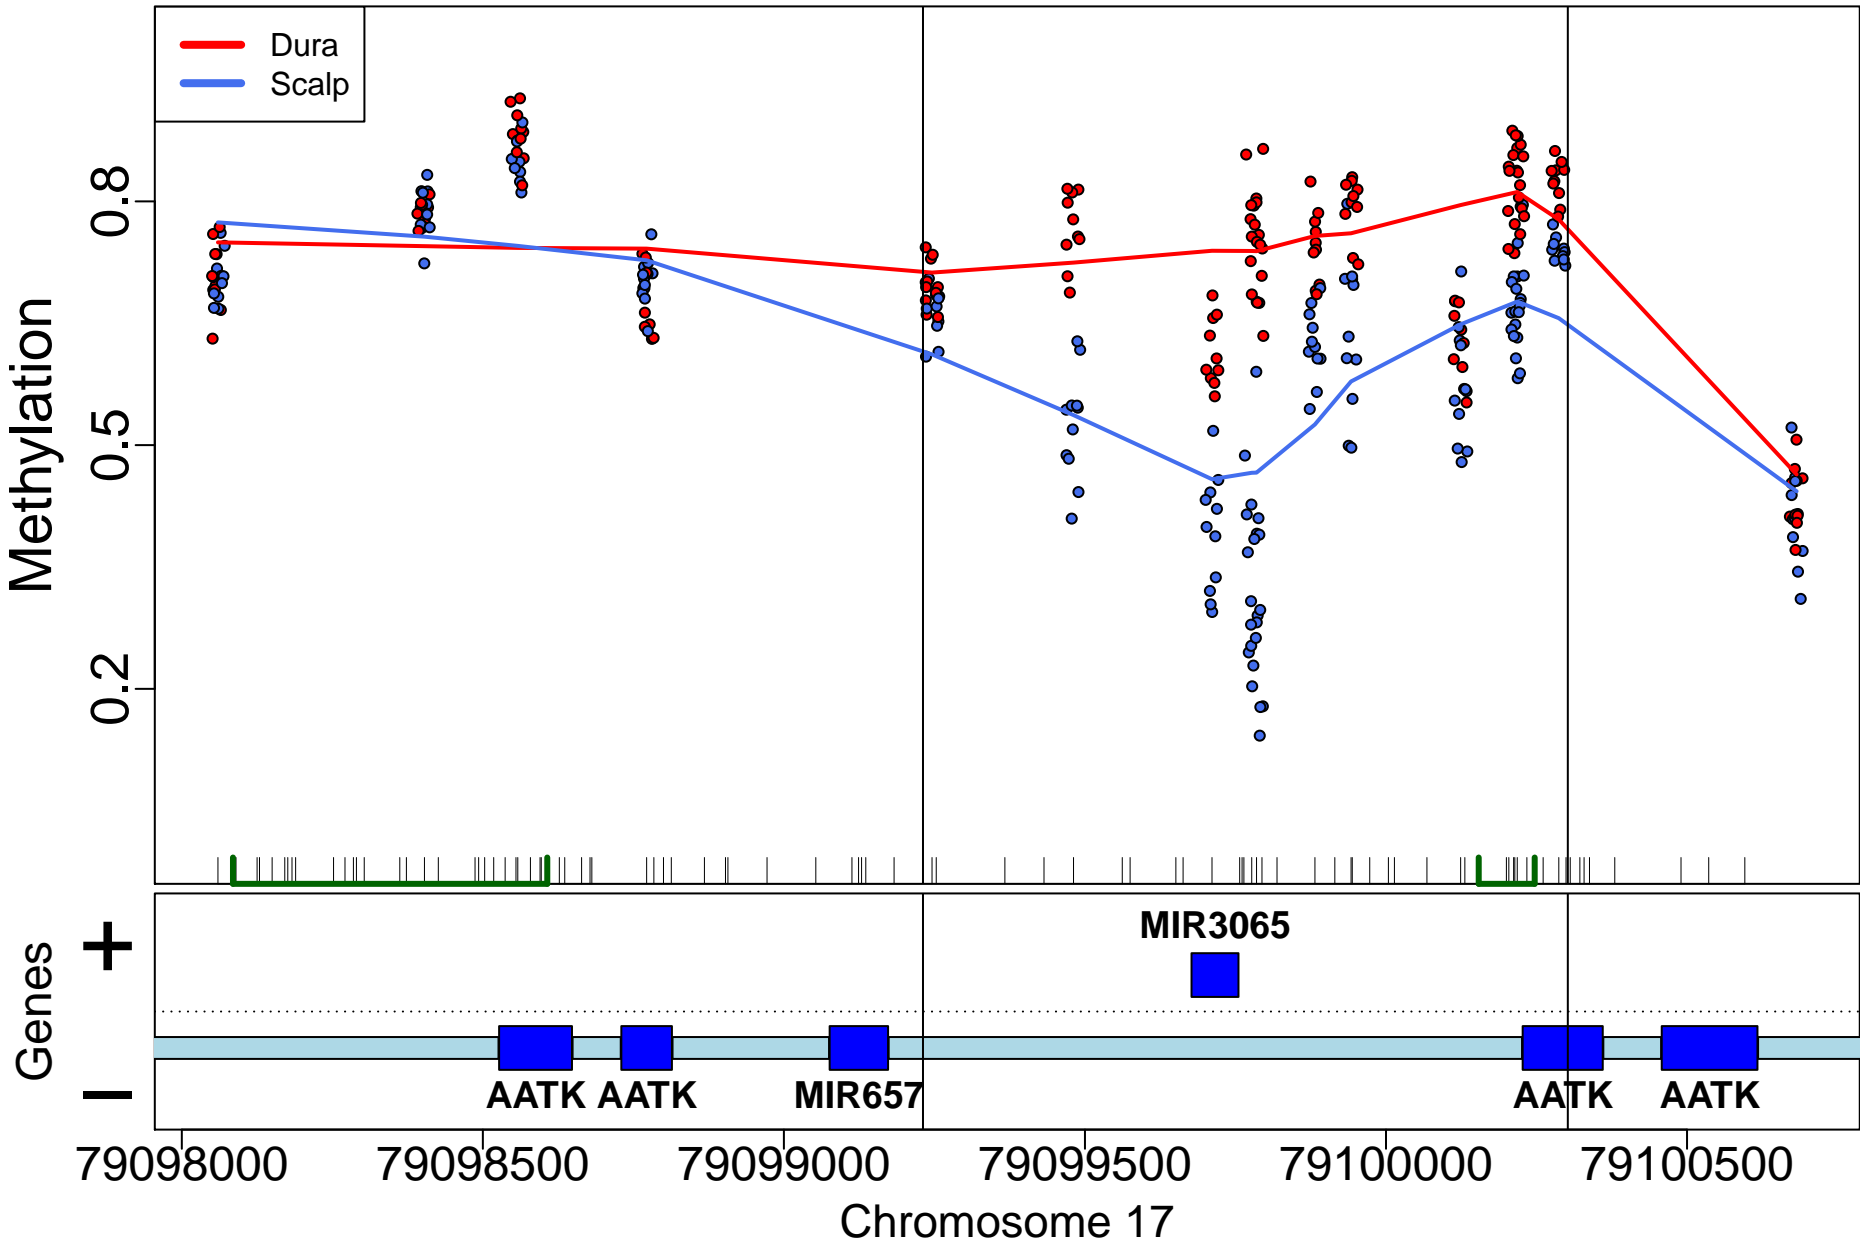

# TEKT3; 12bp from tss:promoter

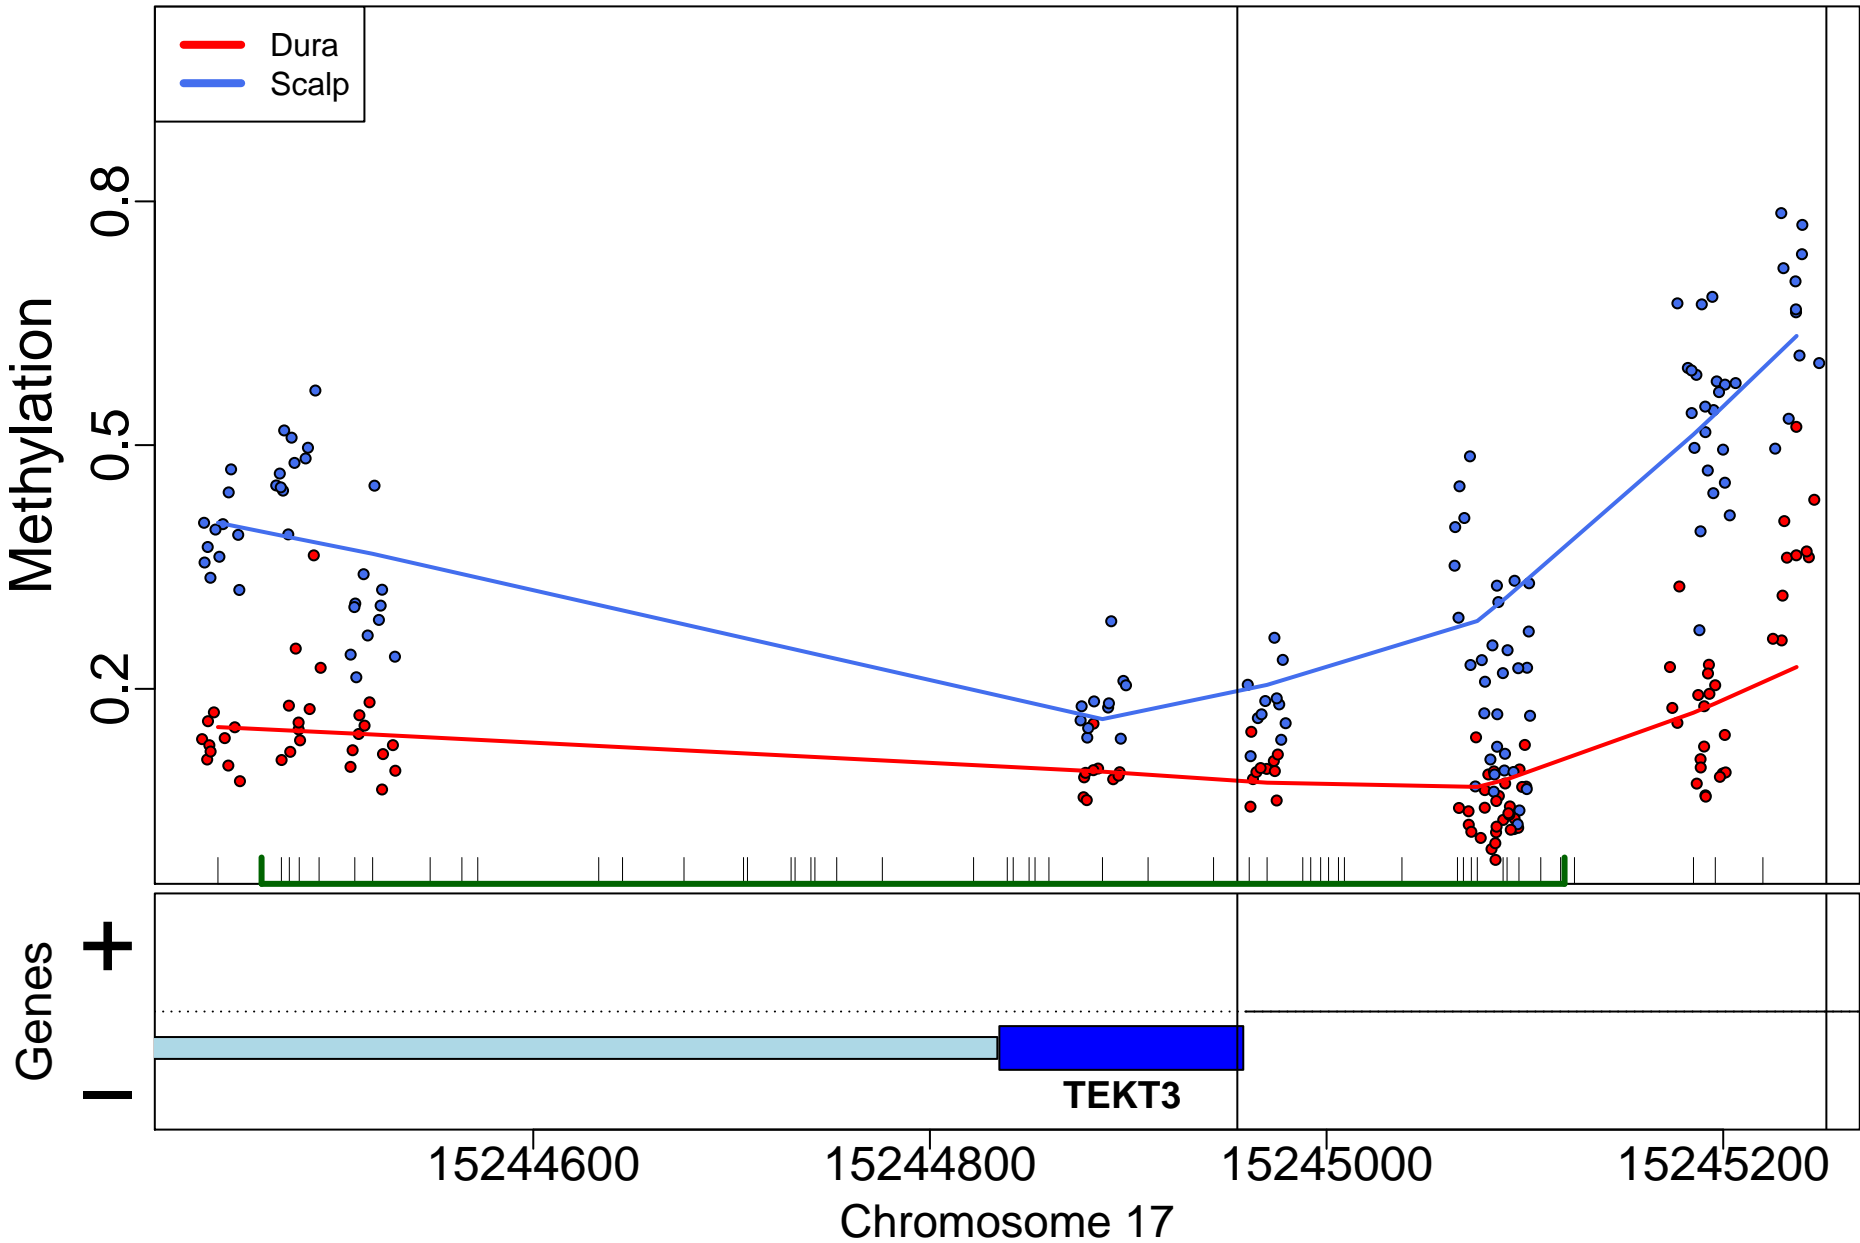

PPP1R9A; 1454bp from tss:inside intron

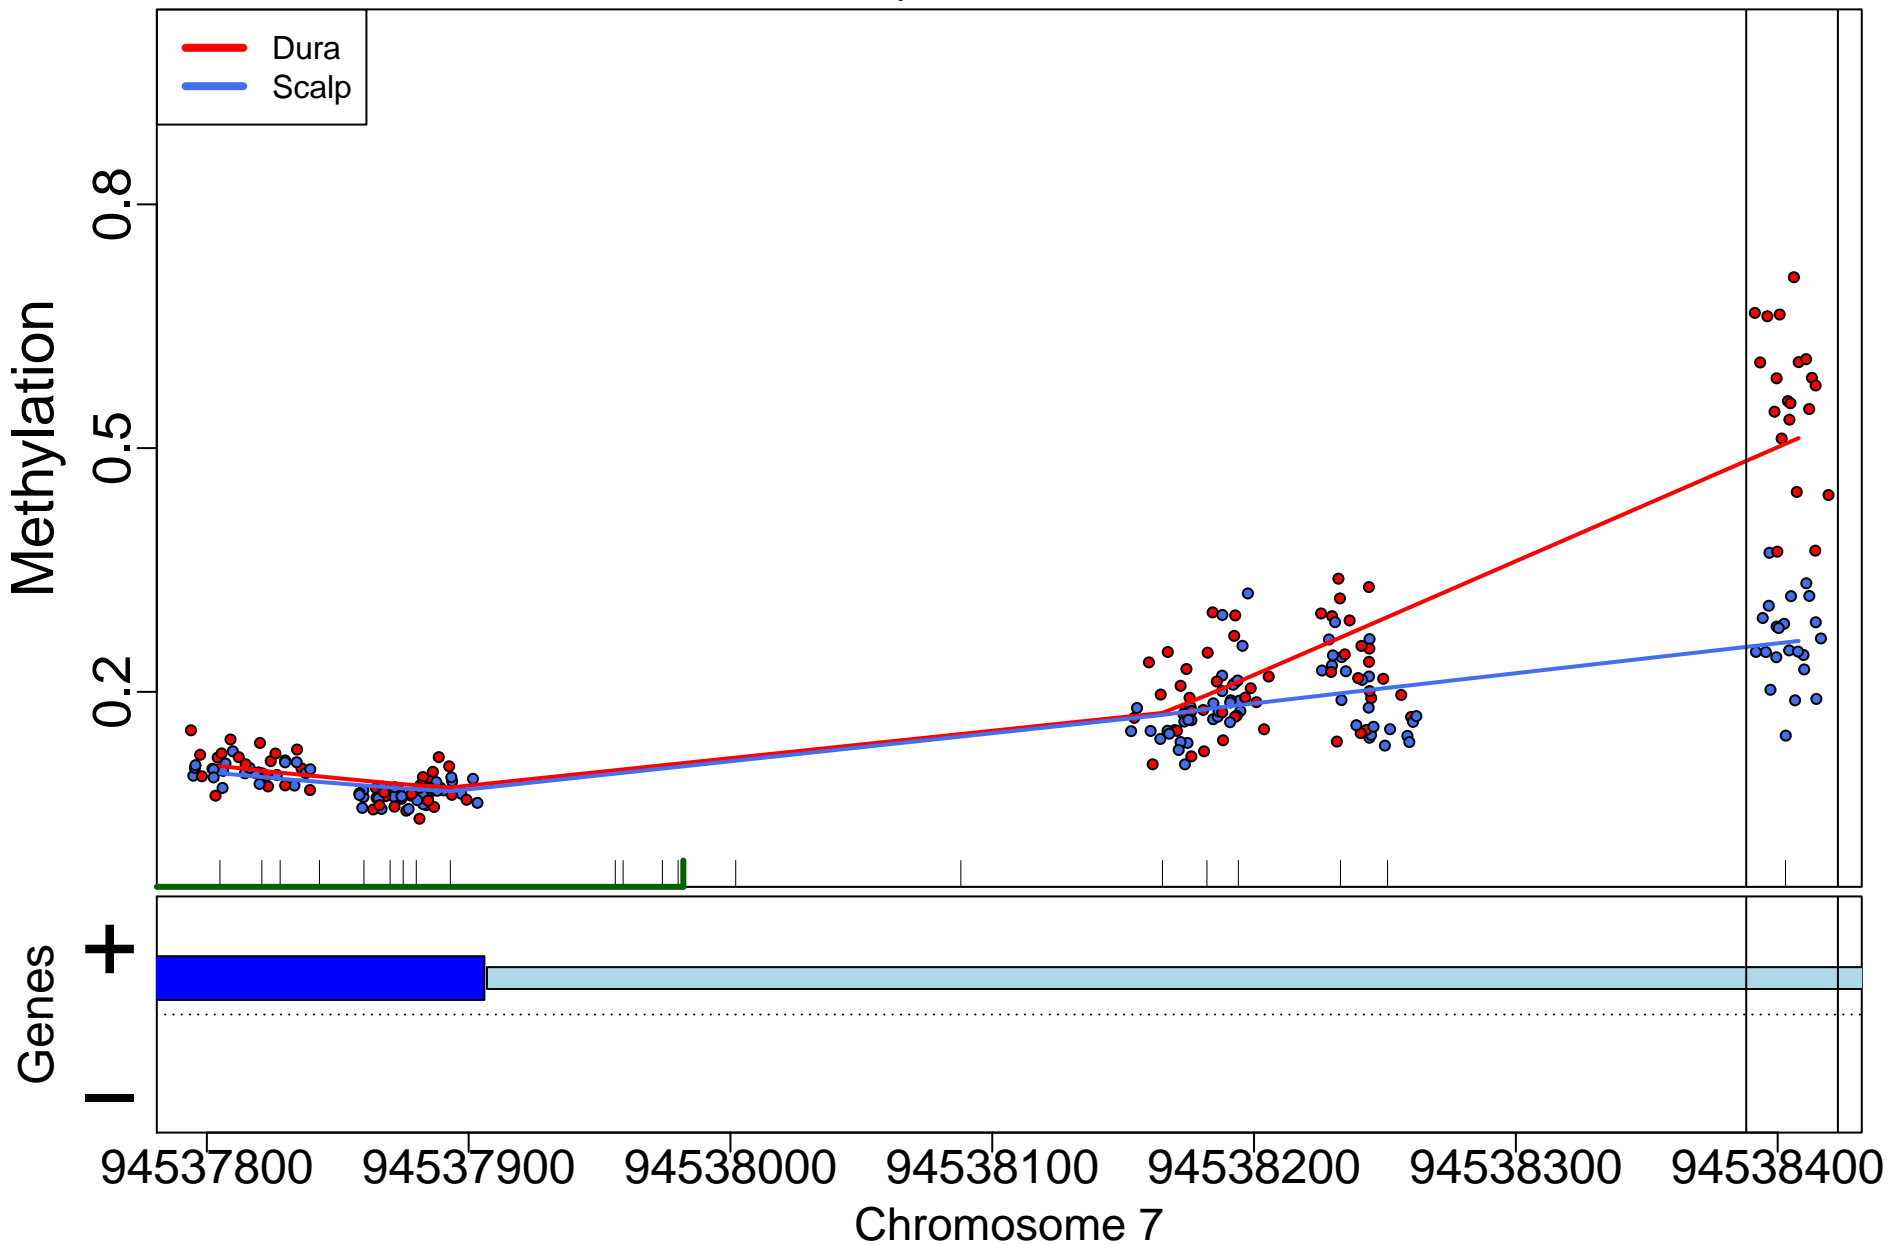

MCF2L; 21600bp from tss:inside intron

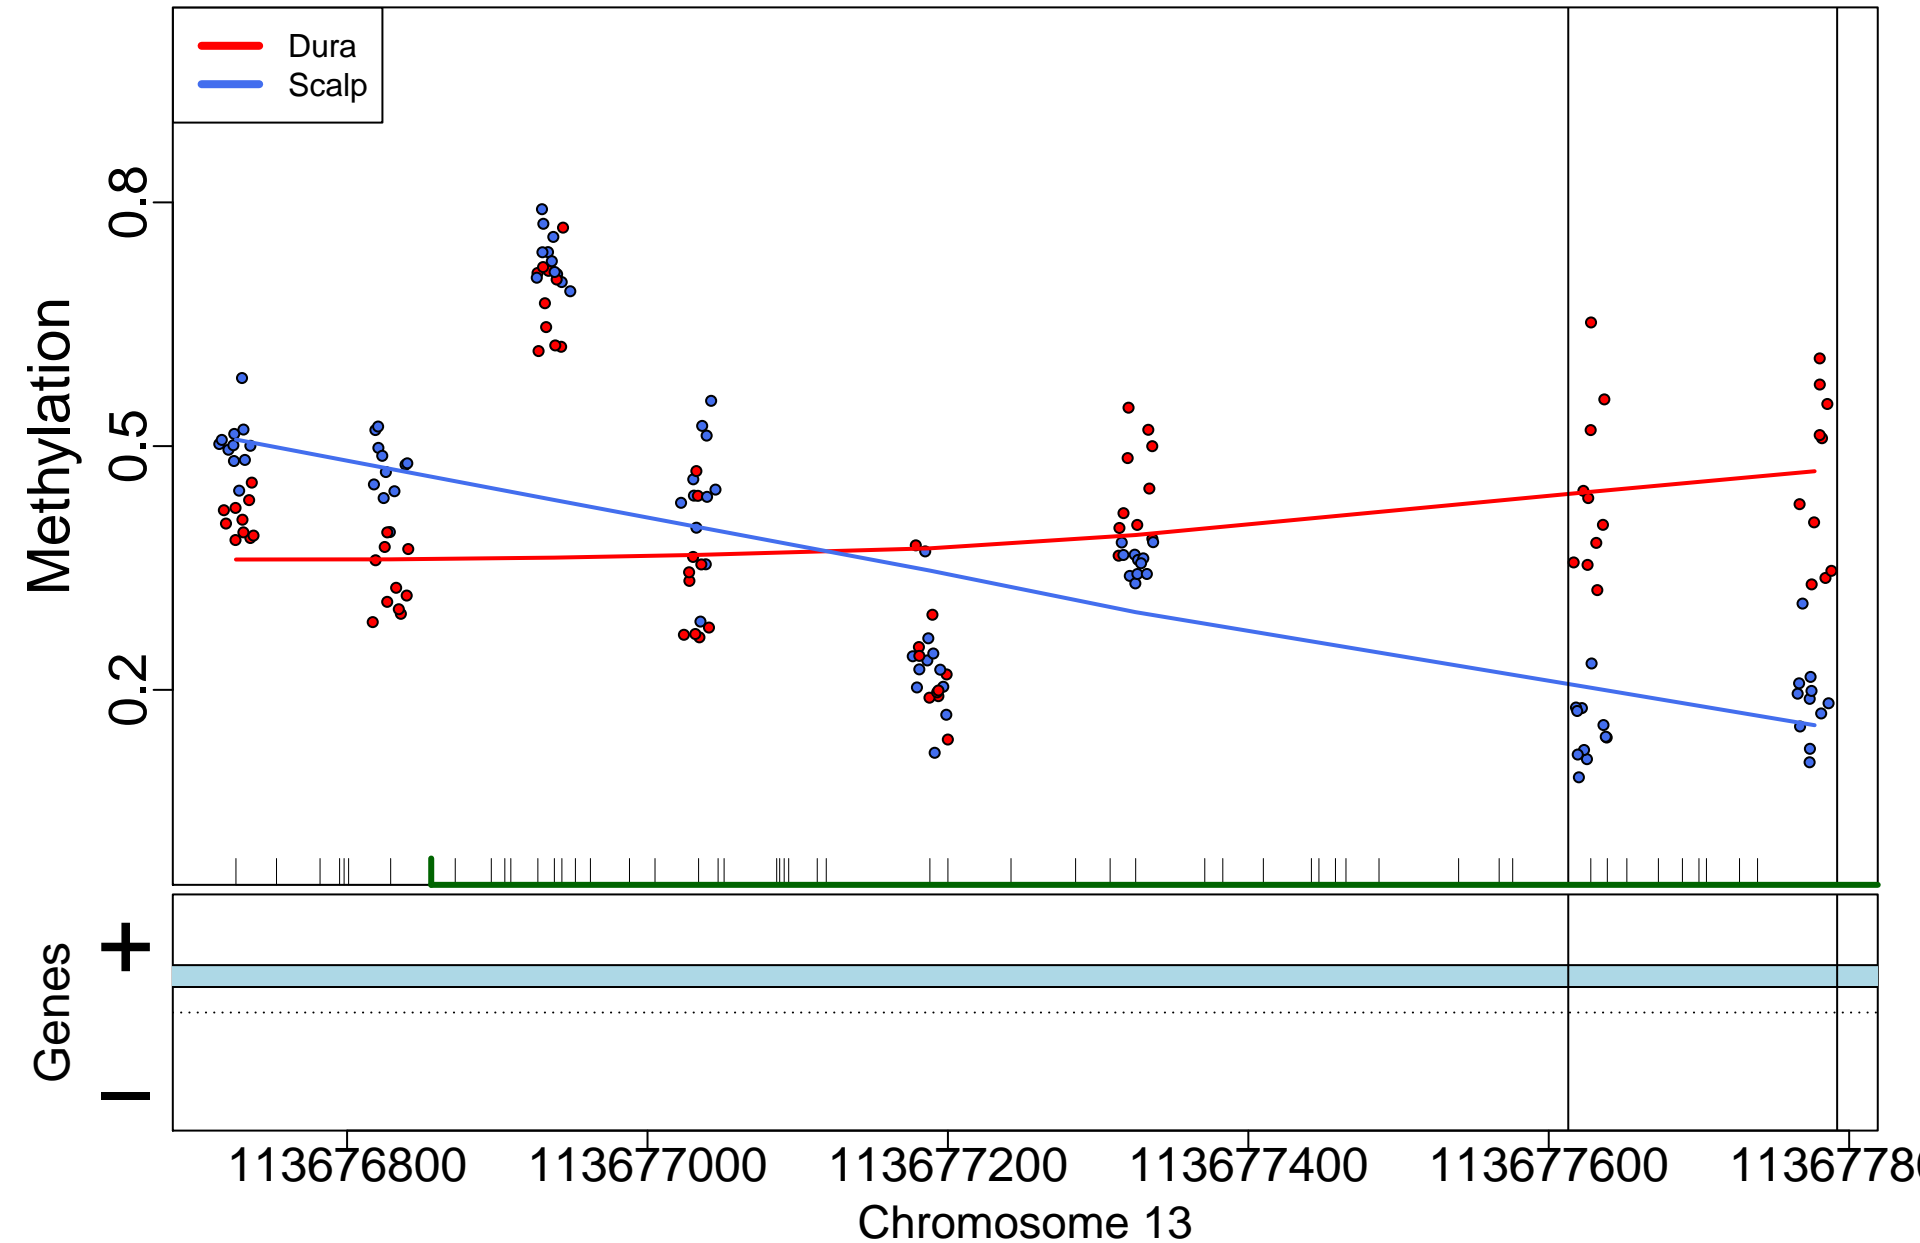

BLOC1S1-RDH5; 553bp from tss:promoter

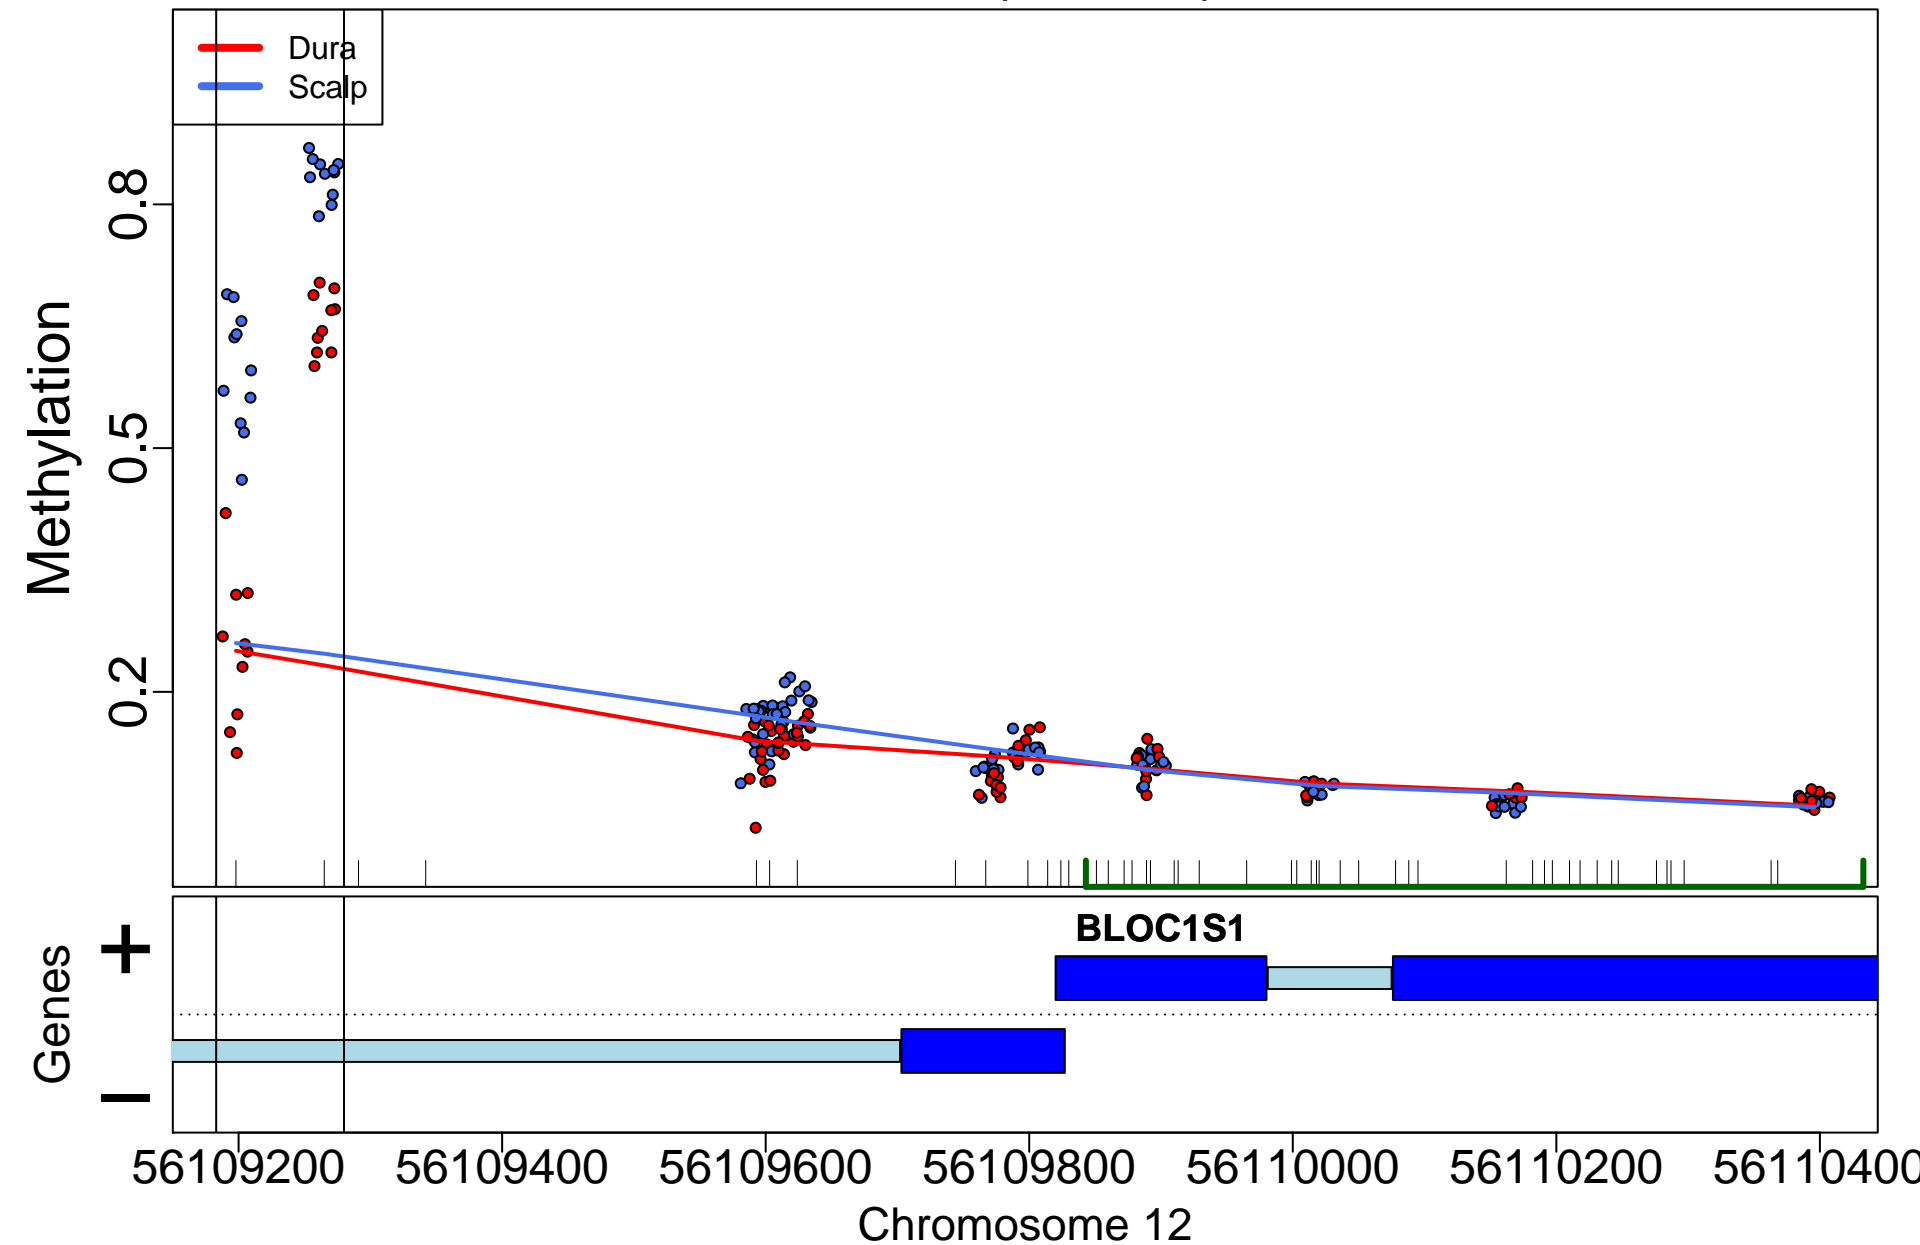

# SCAND3; 28859bp from tss:upstream

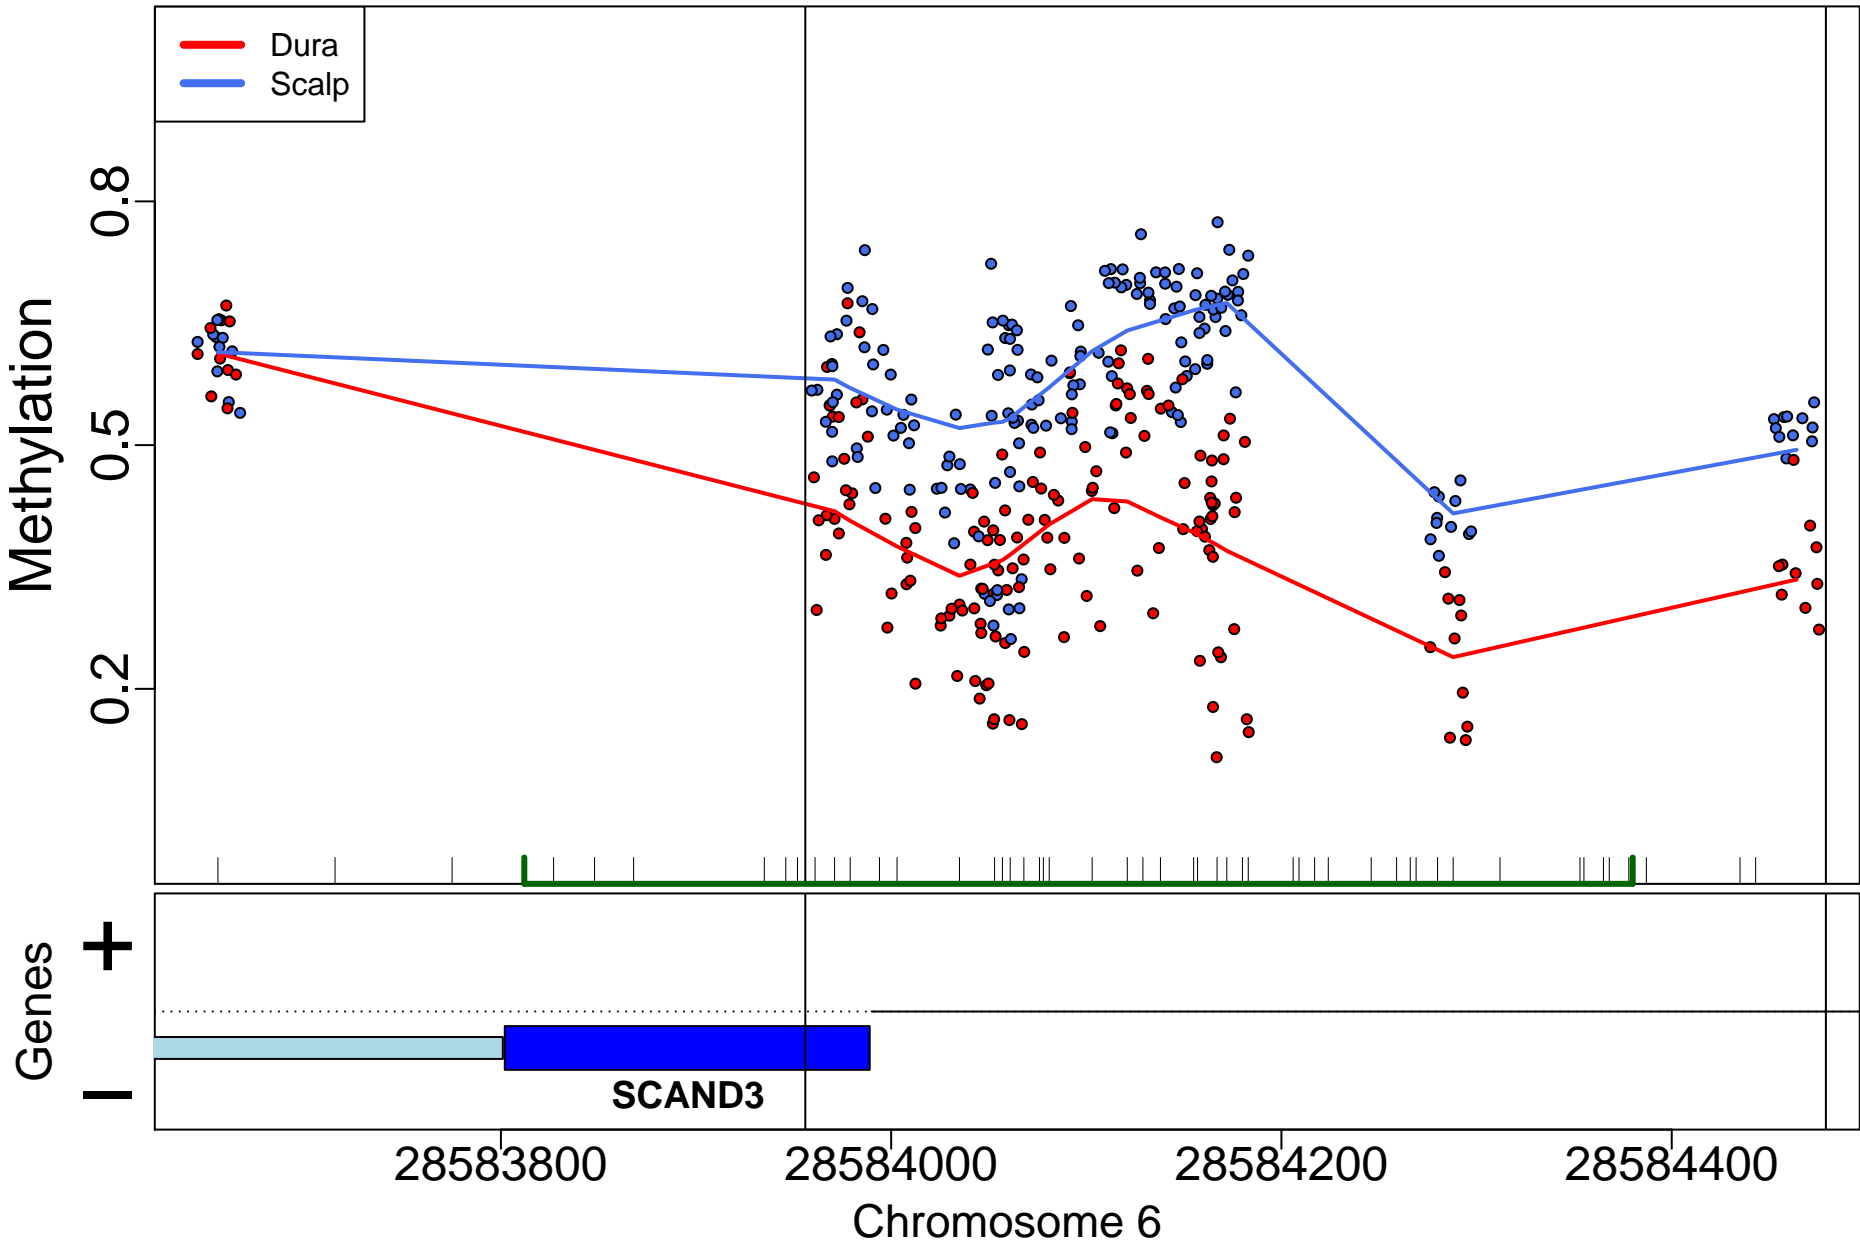



# HOXA3; 14055bp from tss:downstream

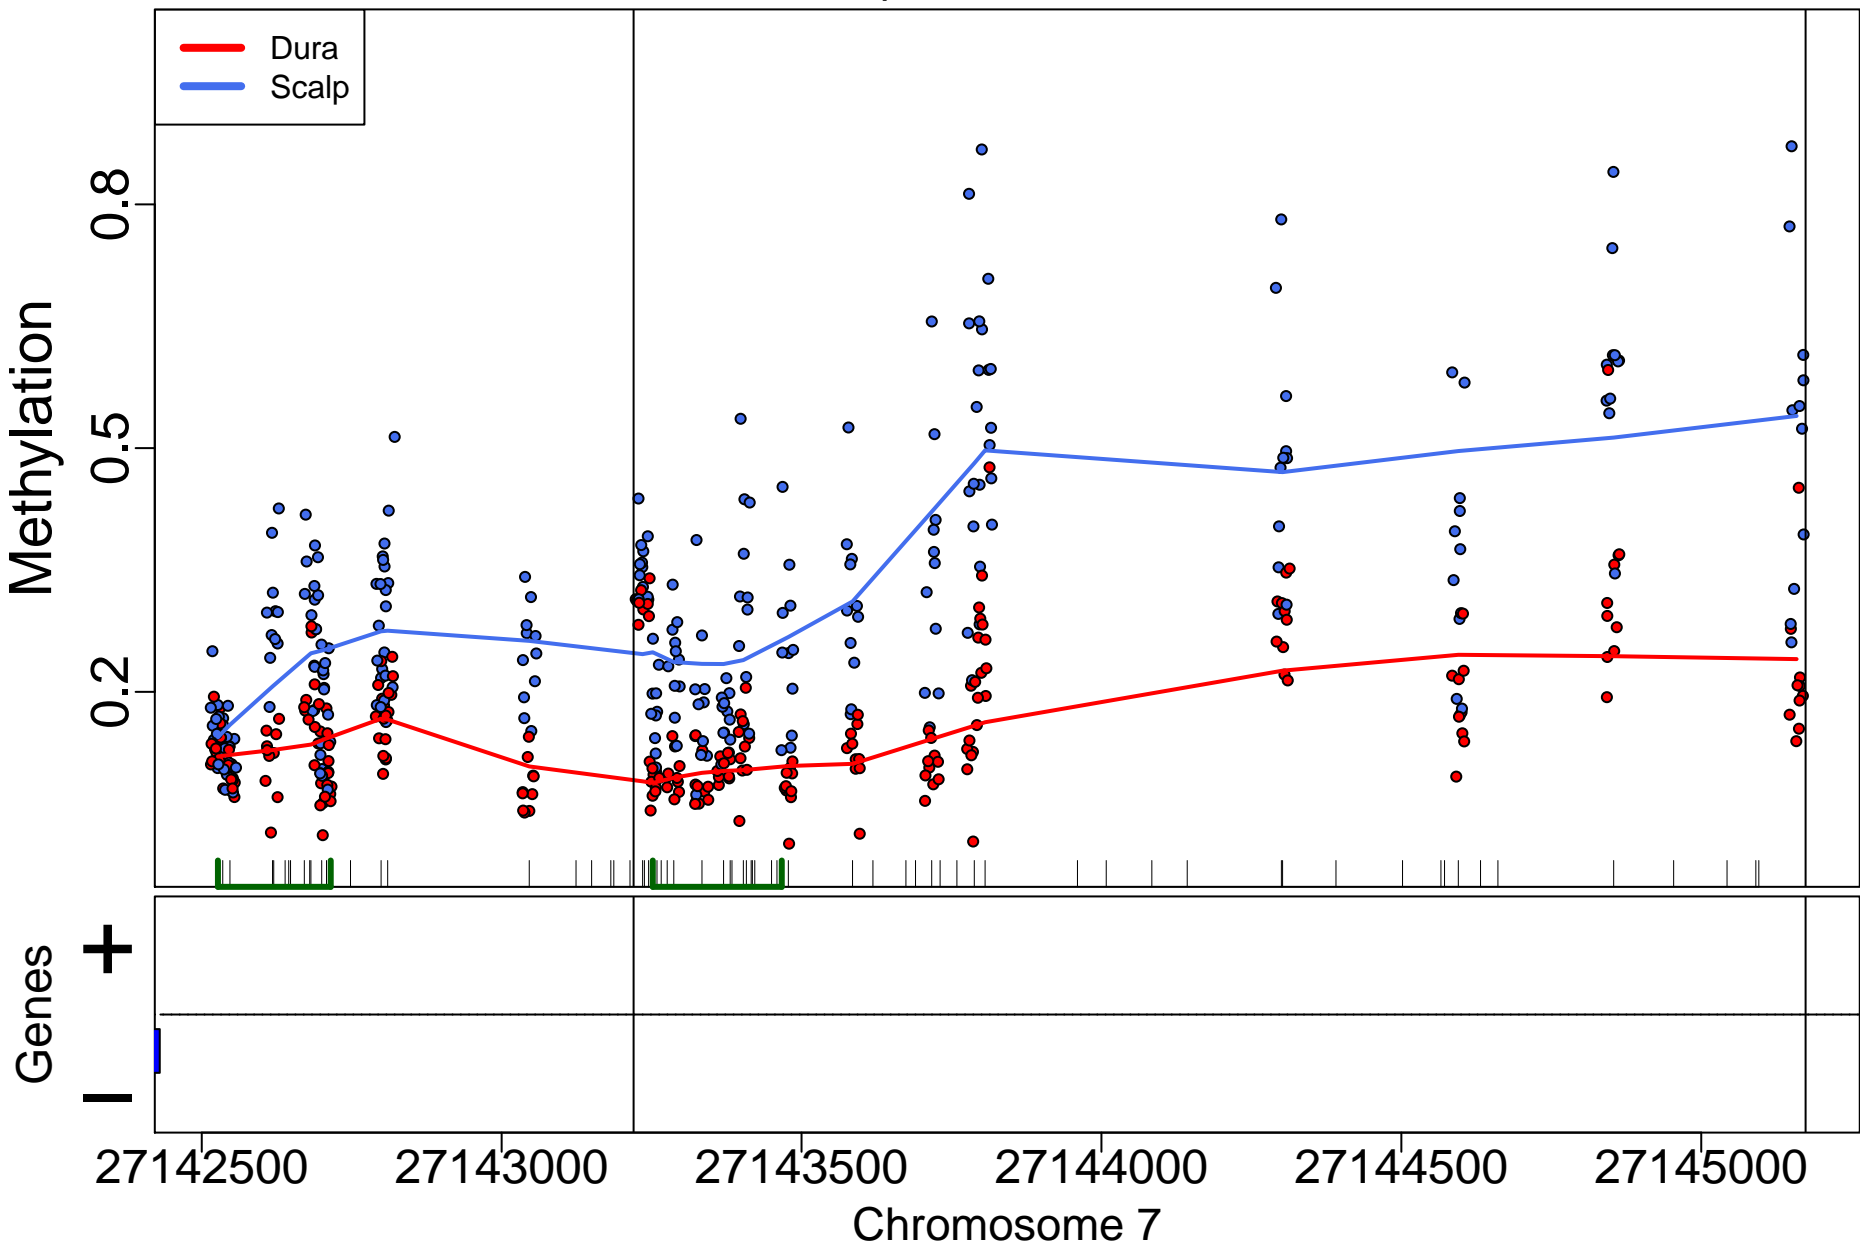

RIN2; 20bp from tss:promoter

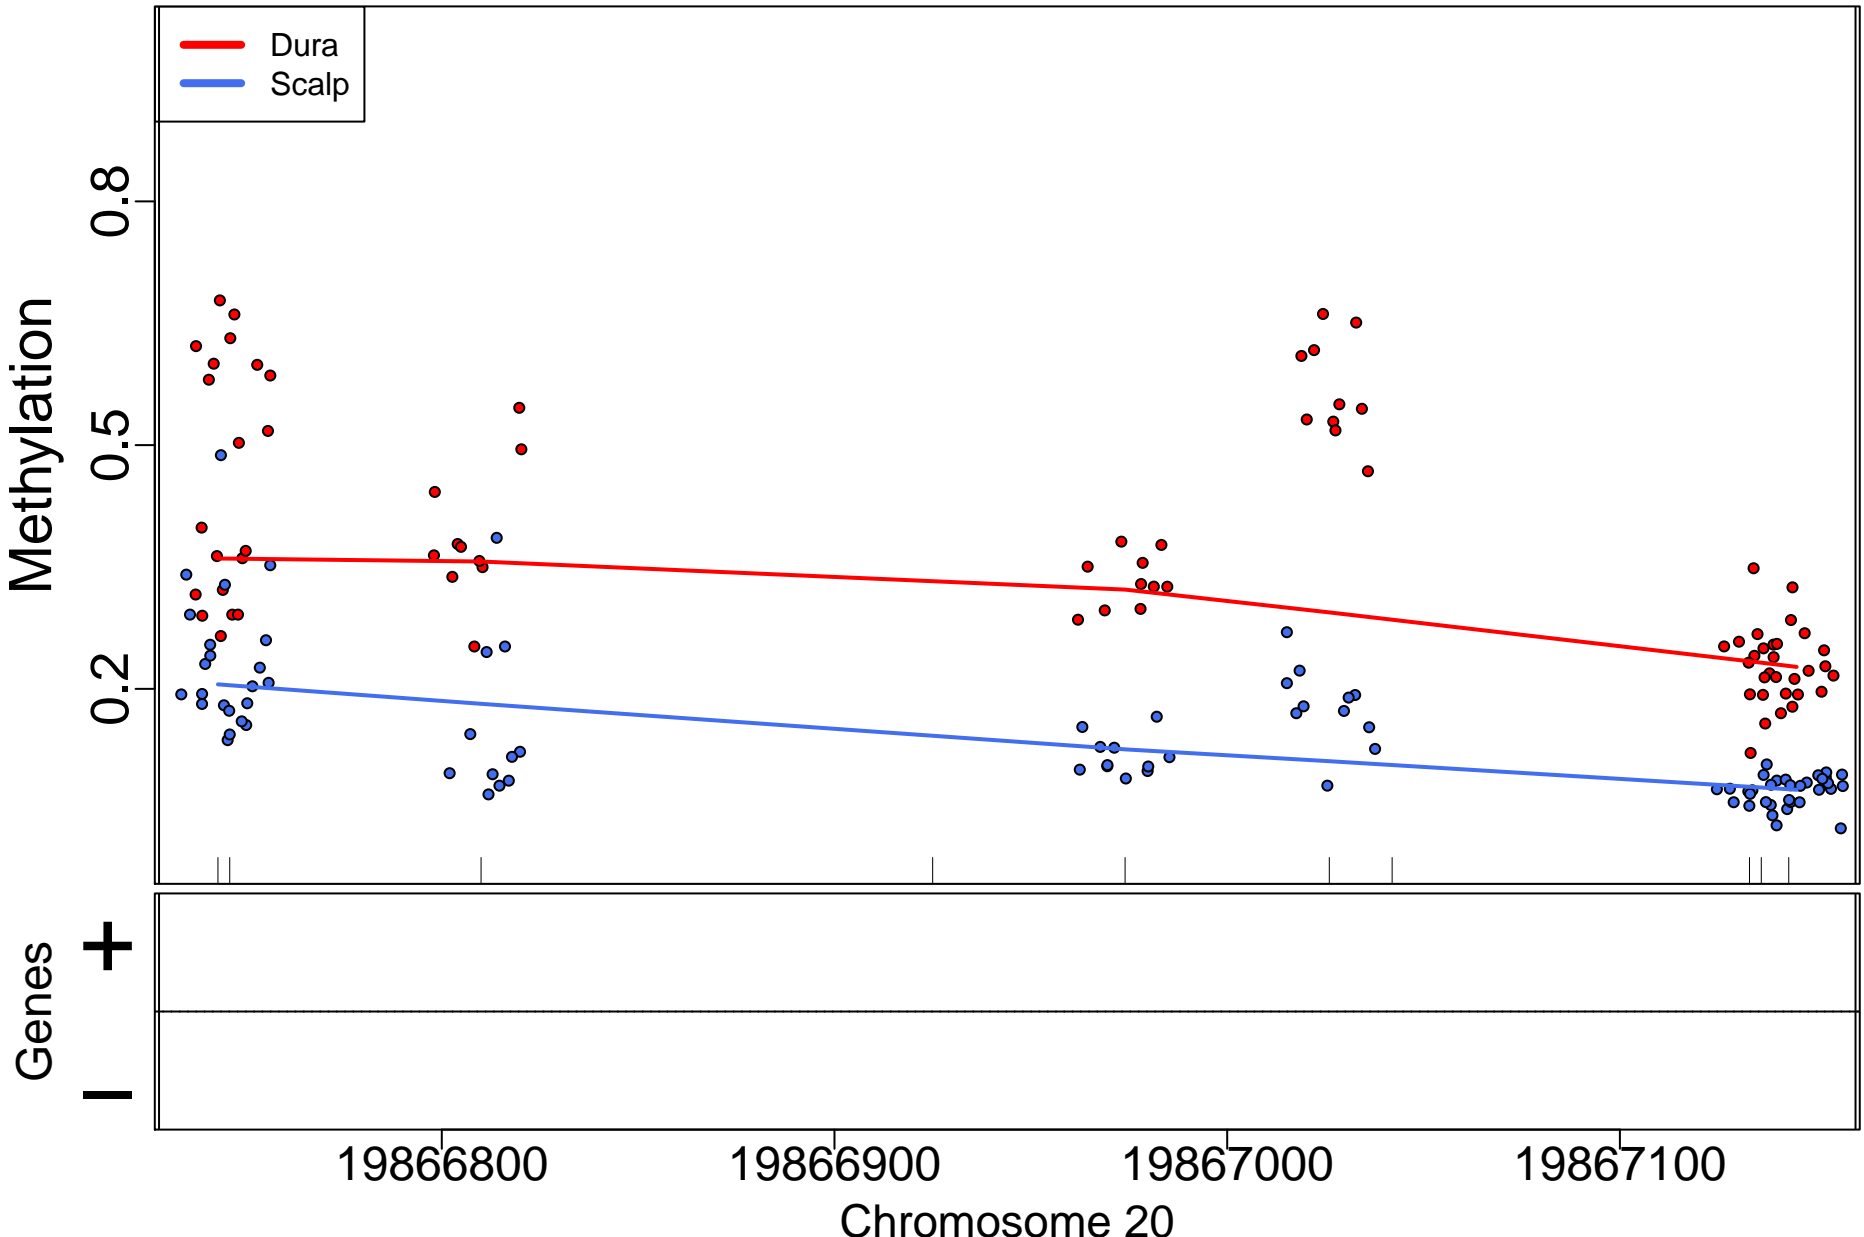

## STX2; 19446bp from tss:inside intron

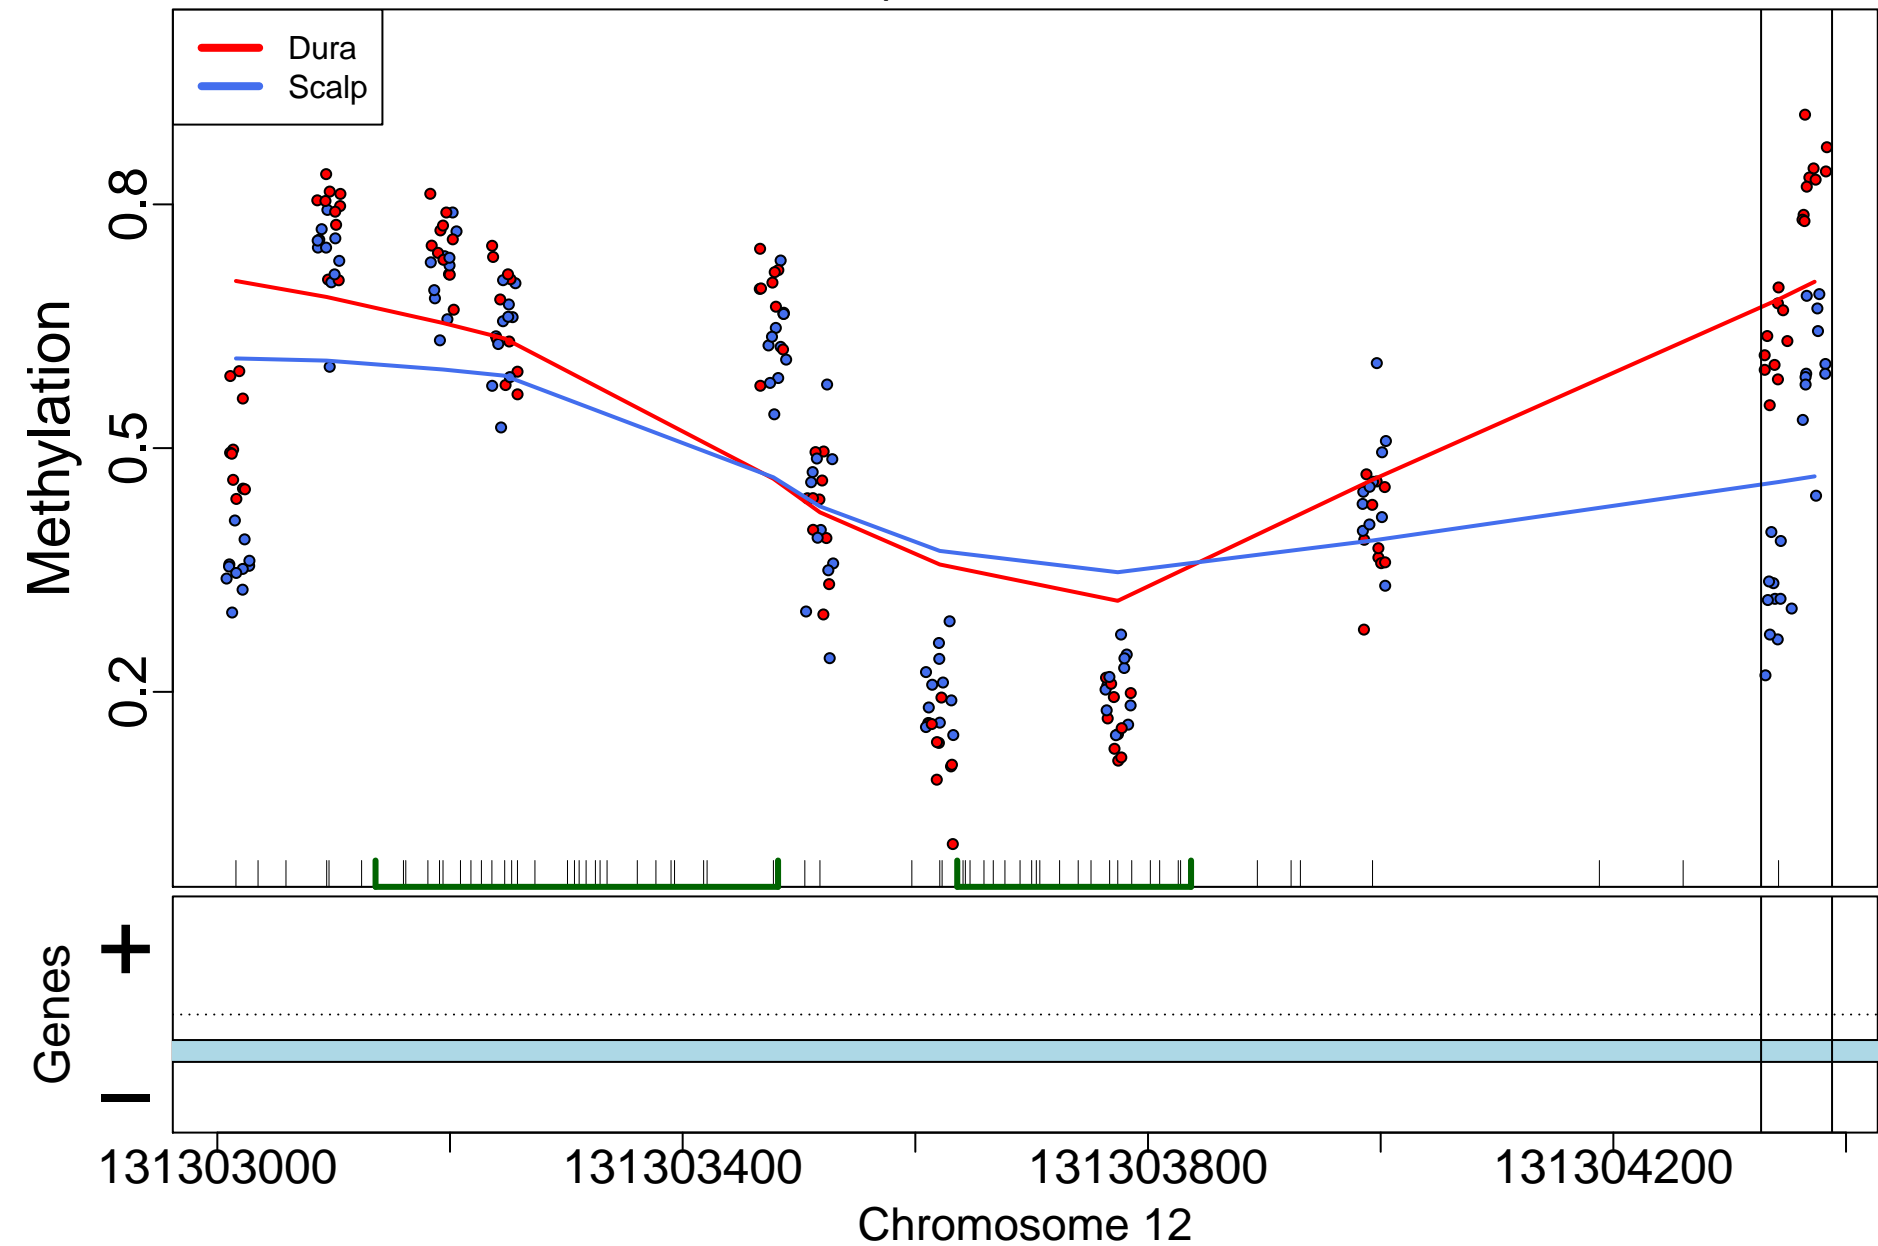

GSG1L; 890bp from tss:inside intron

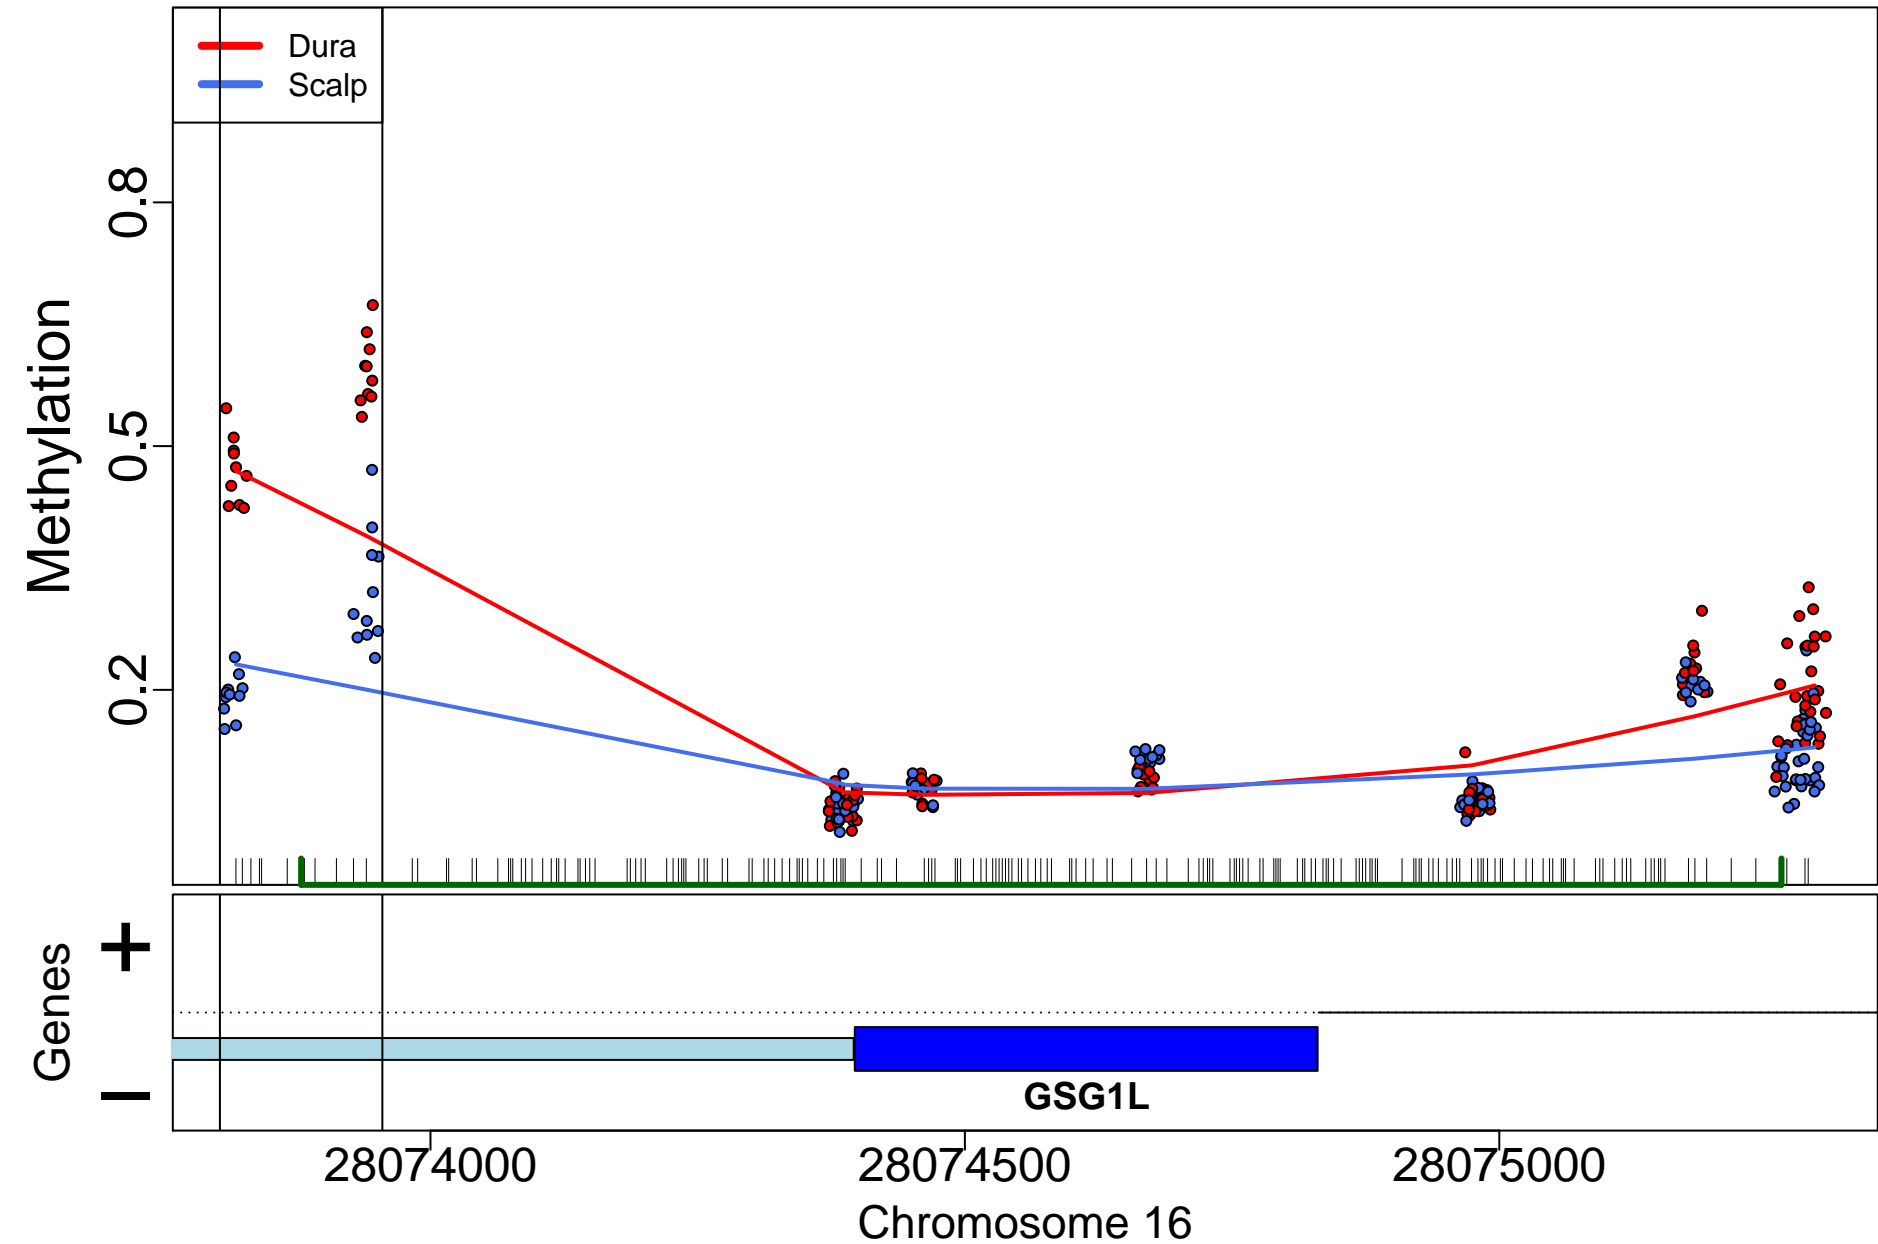

EEFSEC; 207323bp from tss:inside intron

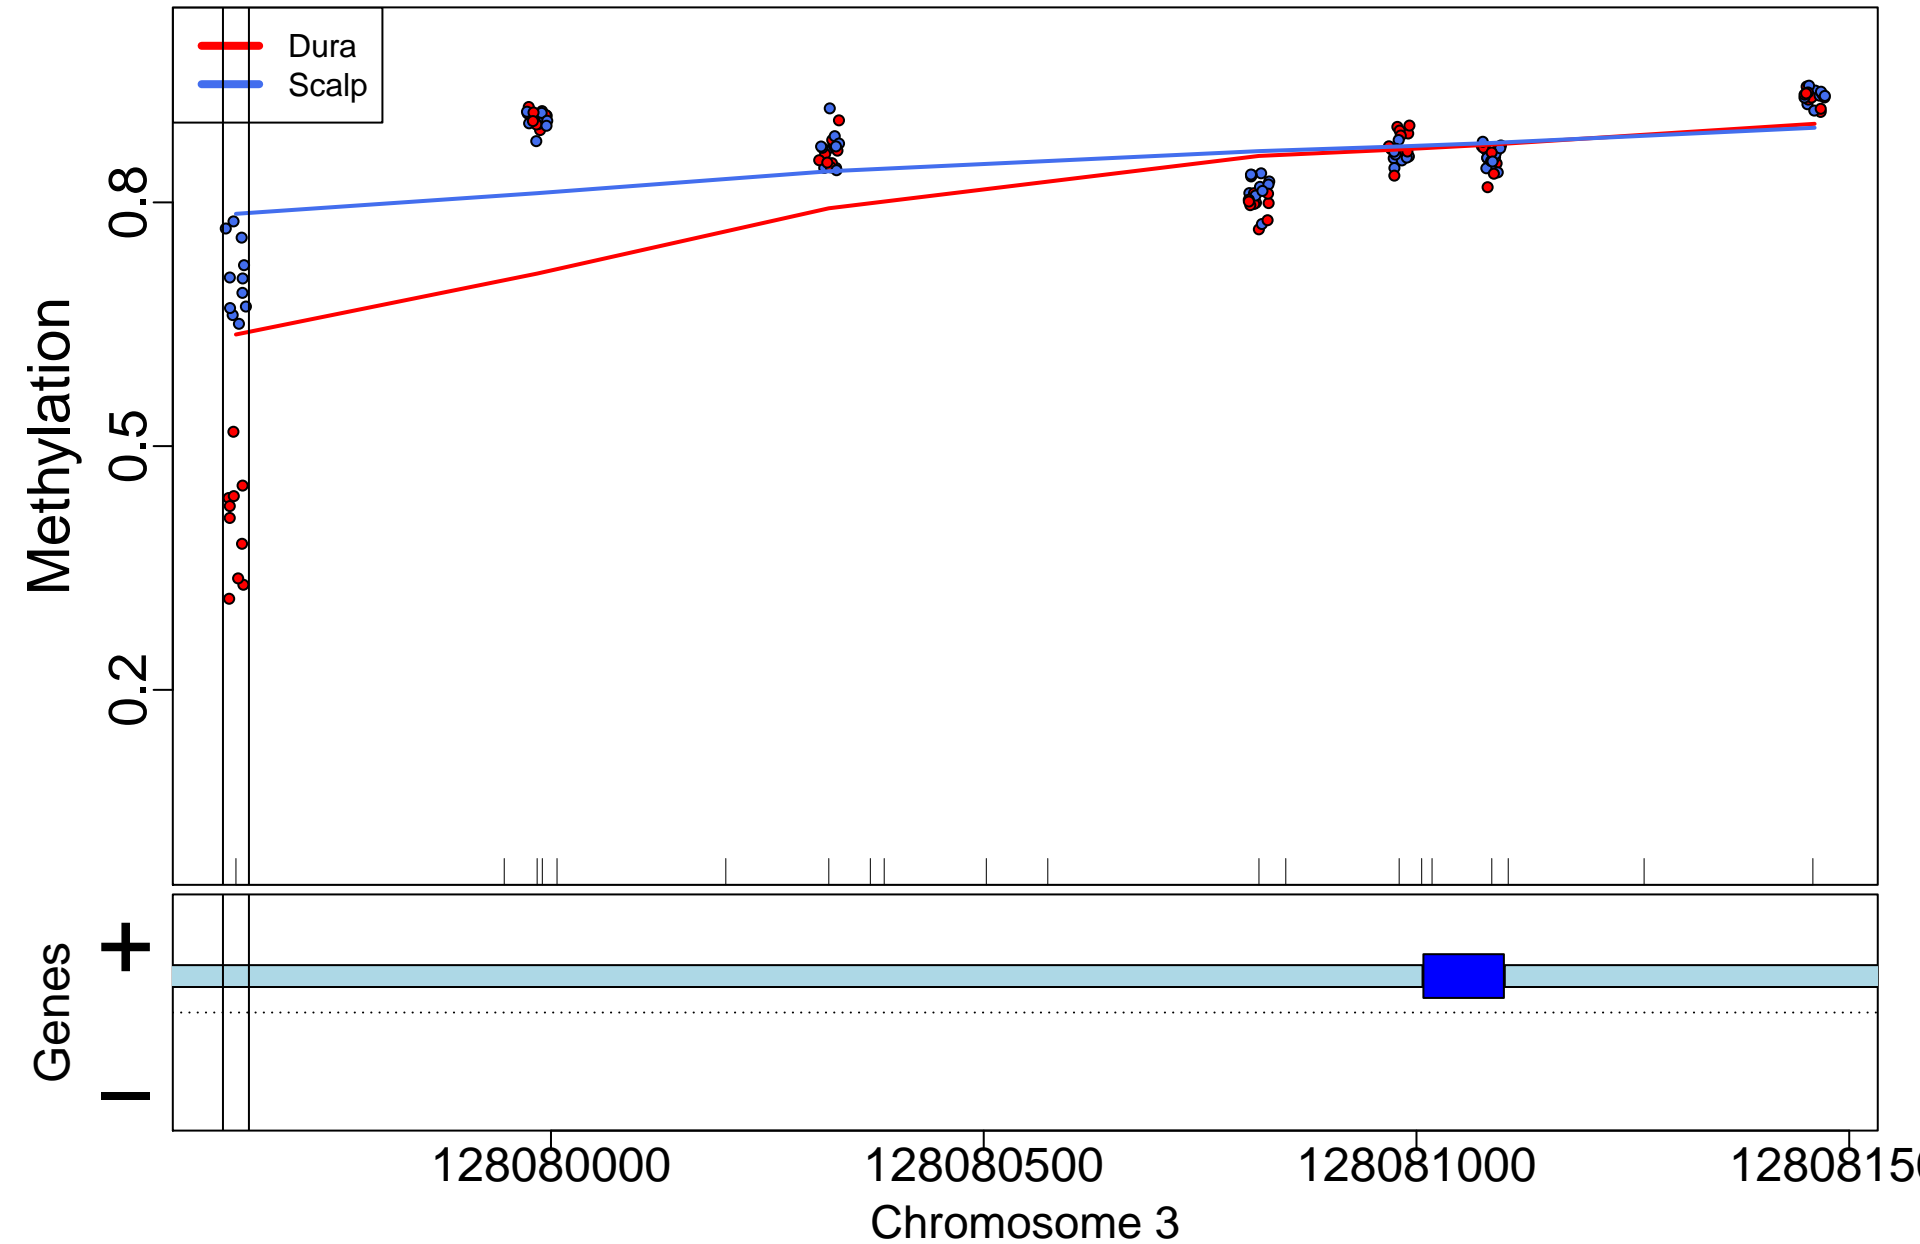

# EGFLAM; 0bp from tss:overlaps 5'

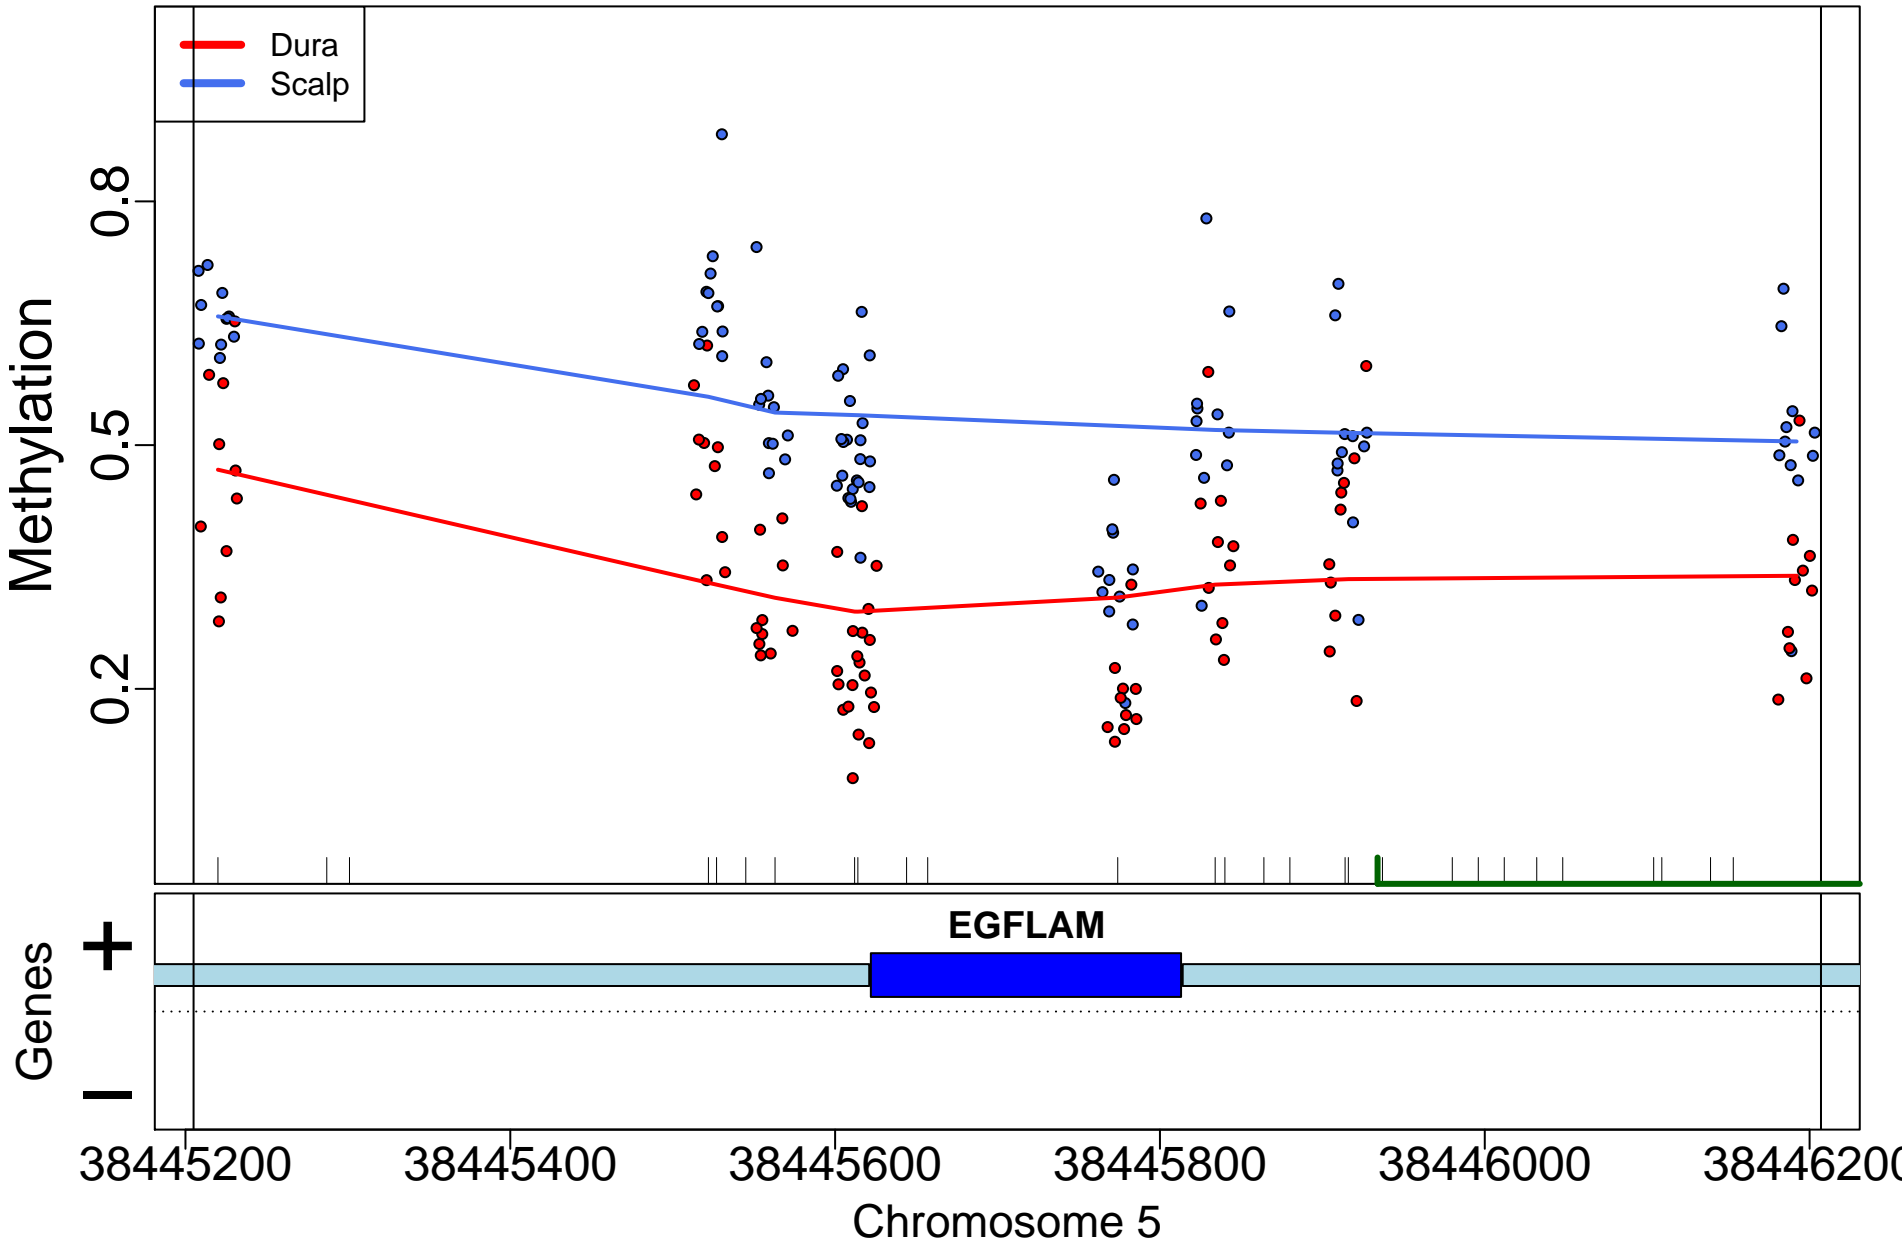

# HNF1A; 0bp from tss:NA

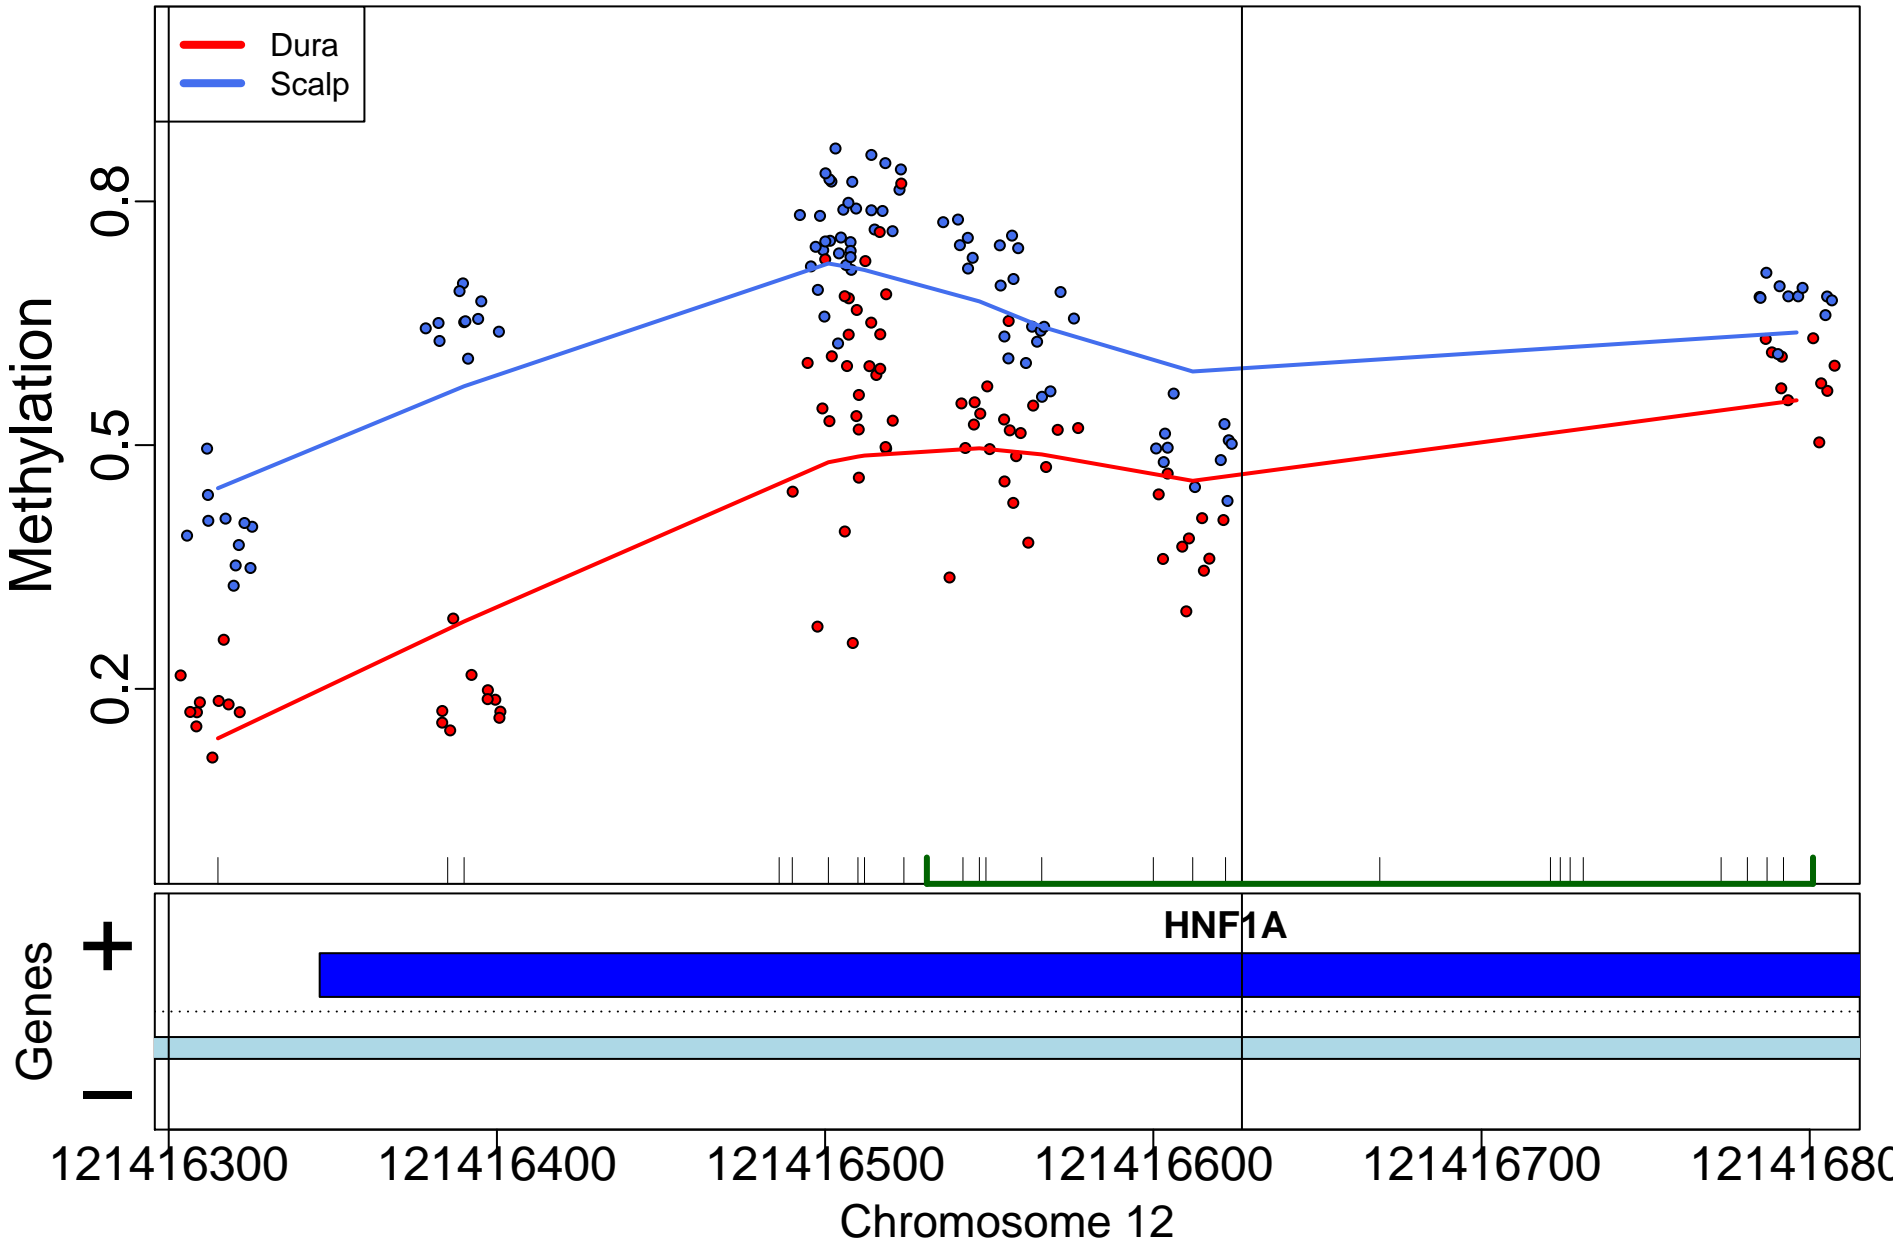

INSIG1; 85505bp from tss:downstream

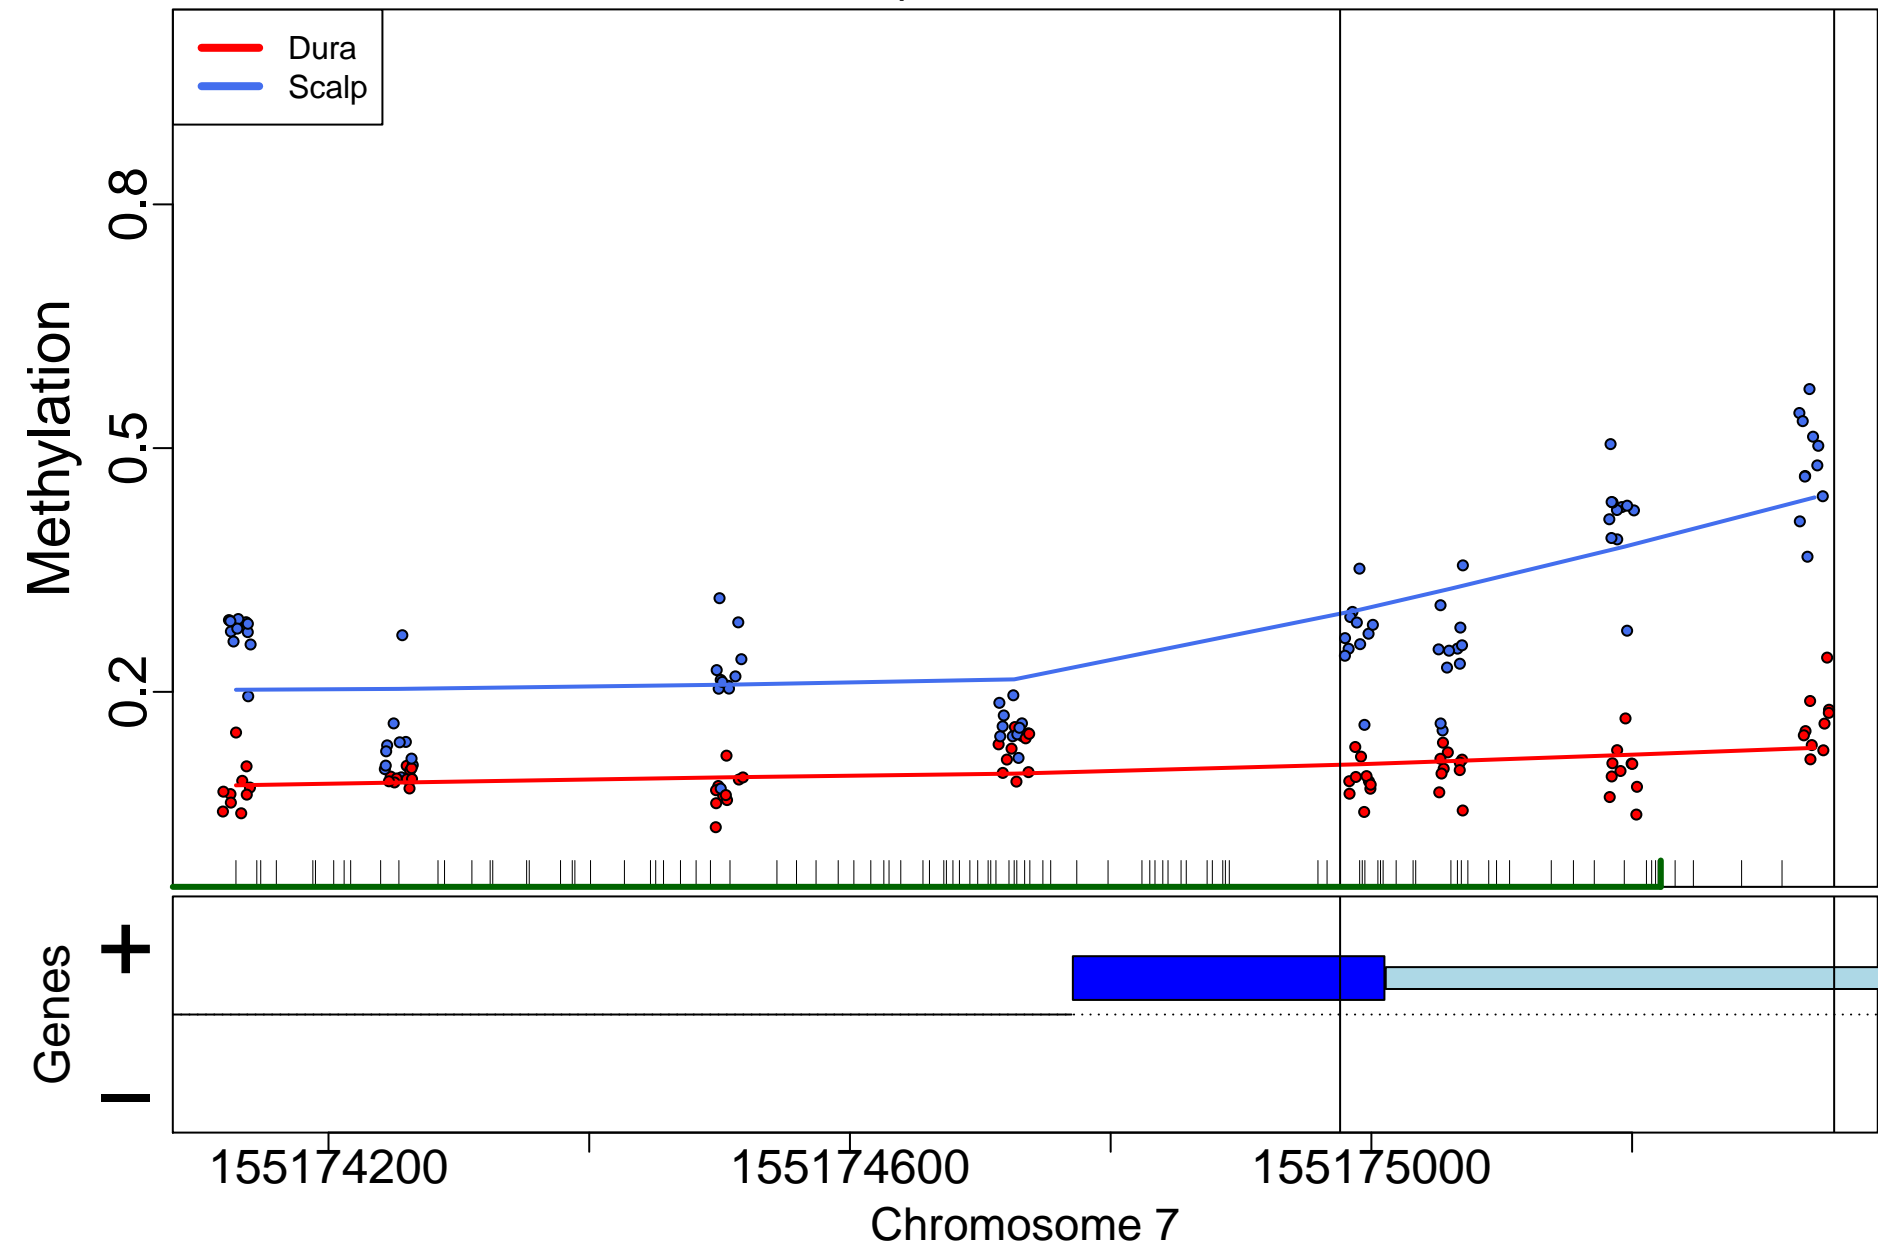



# GYPC; 142bp from tss:promoter

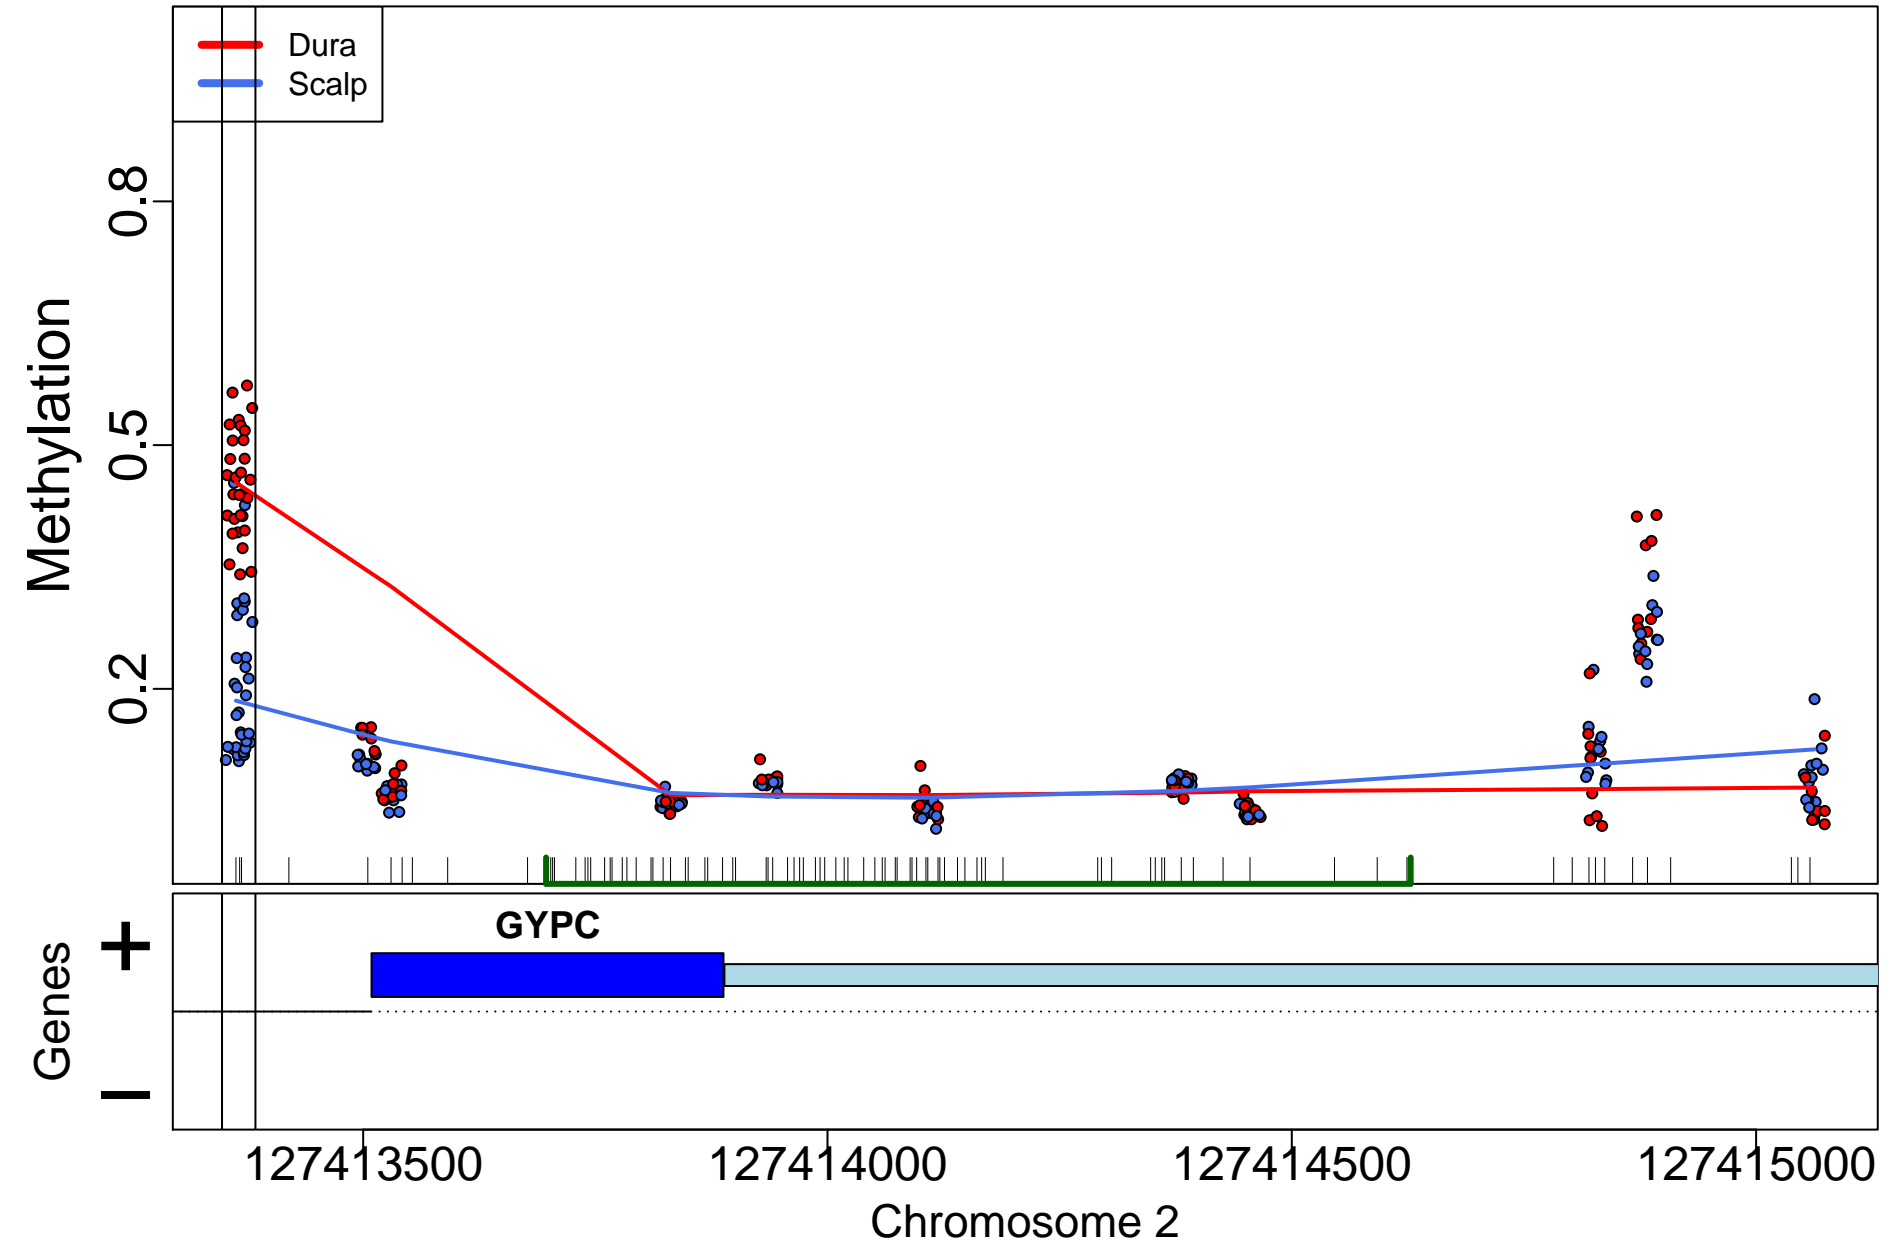

SIX3; 1285bp from tss:inside intron

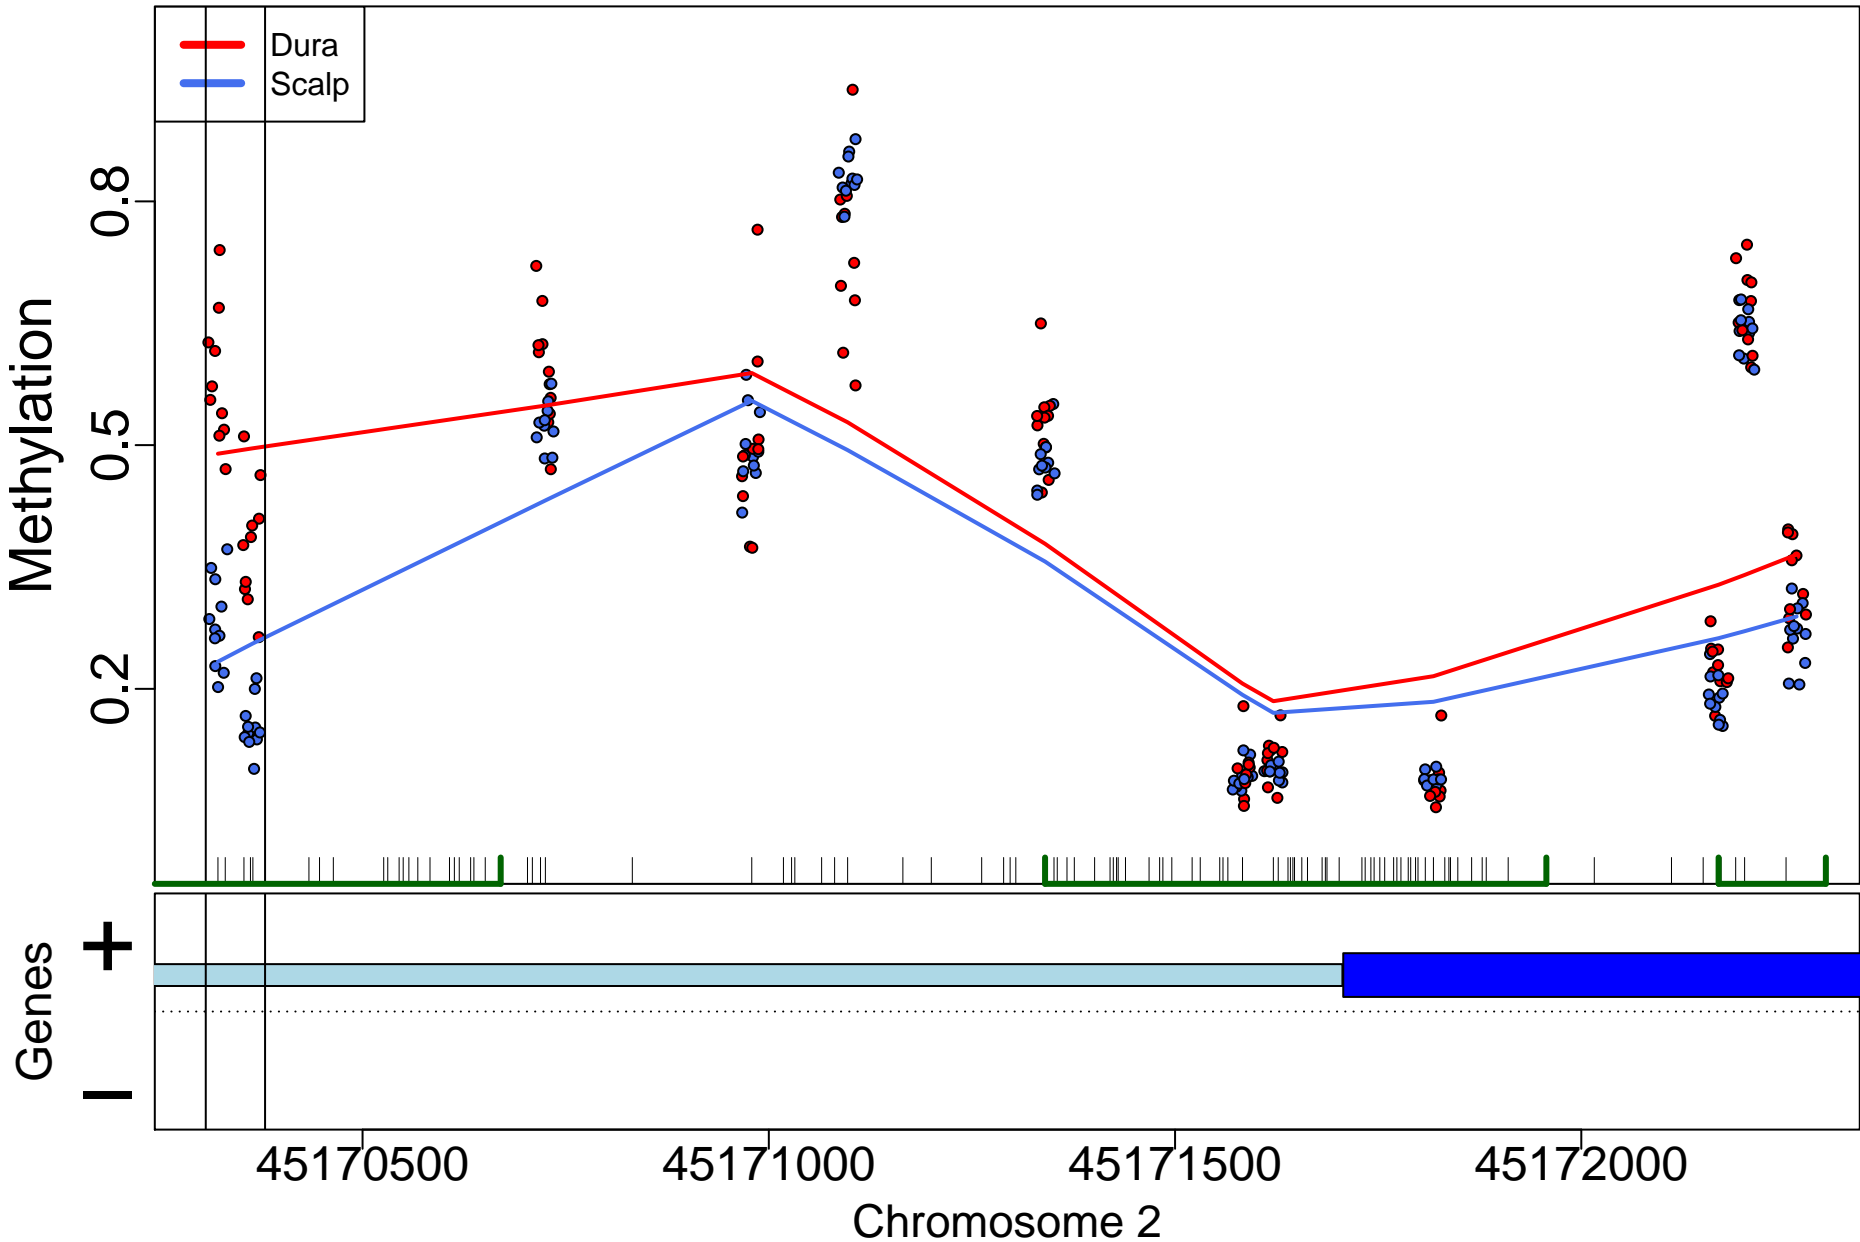

FOXP1; 295082bp from tss:inside intron

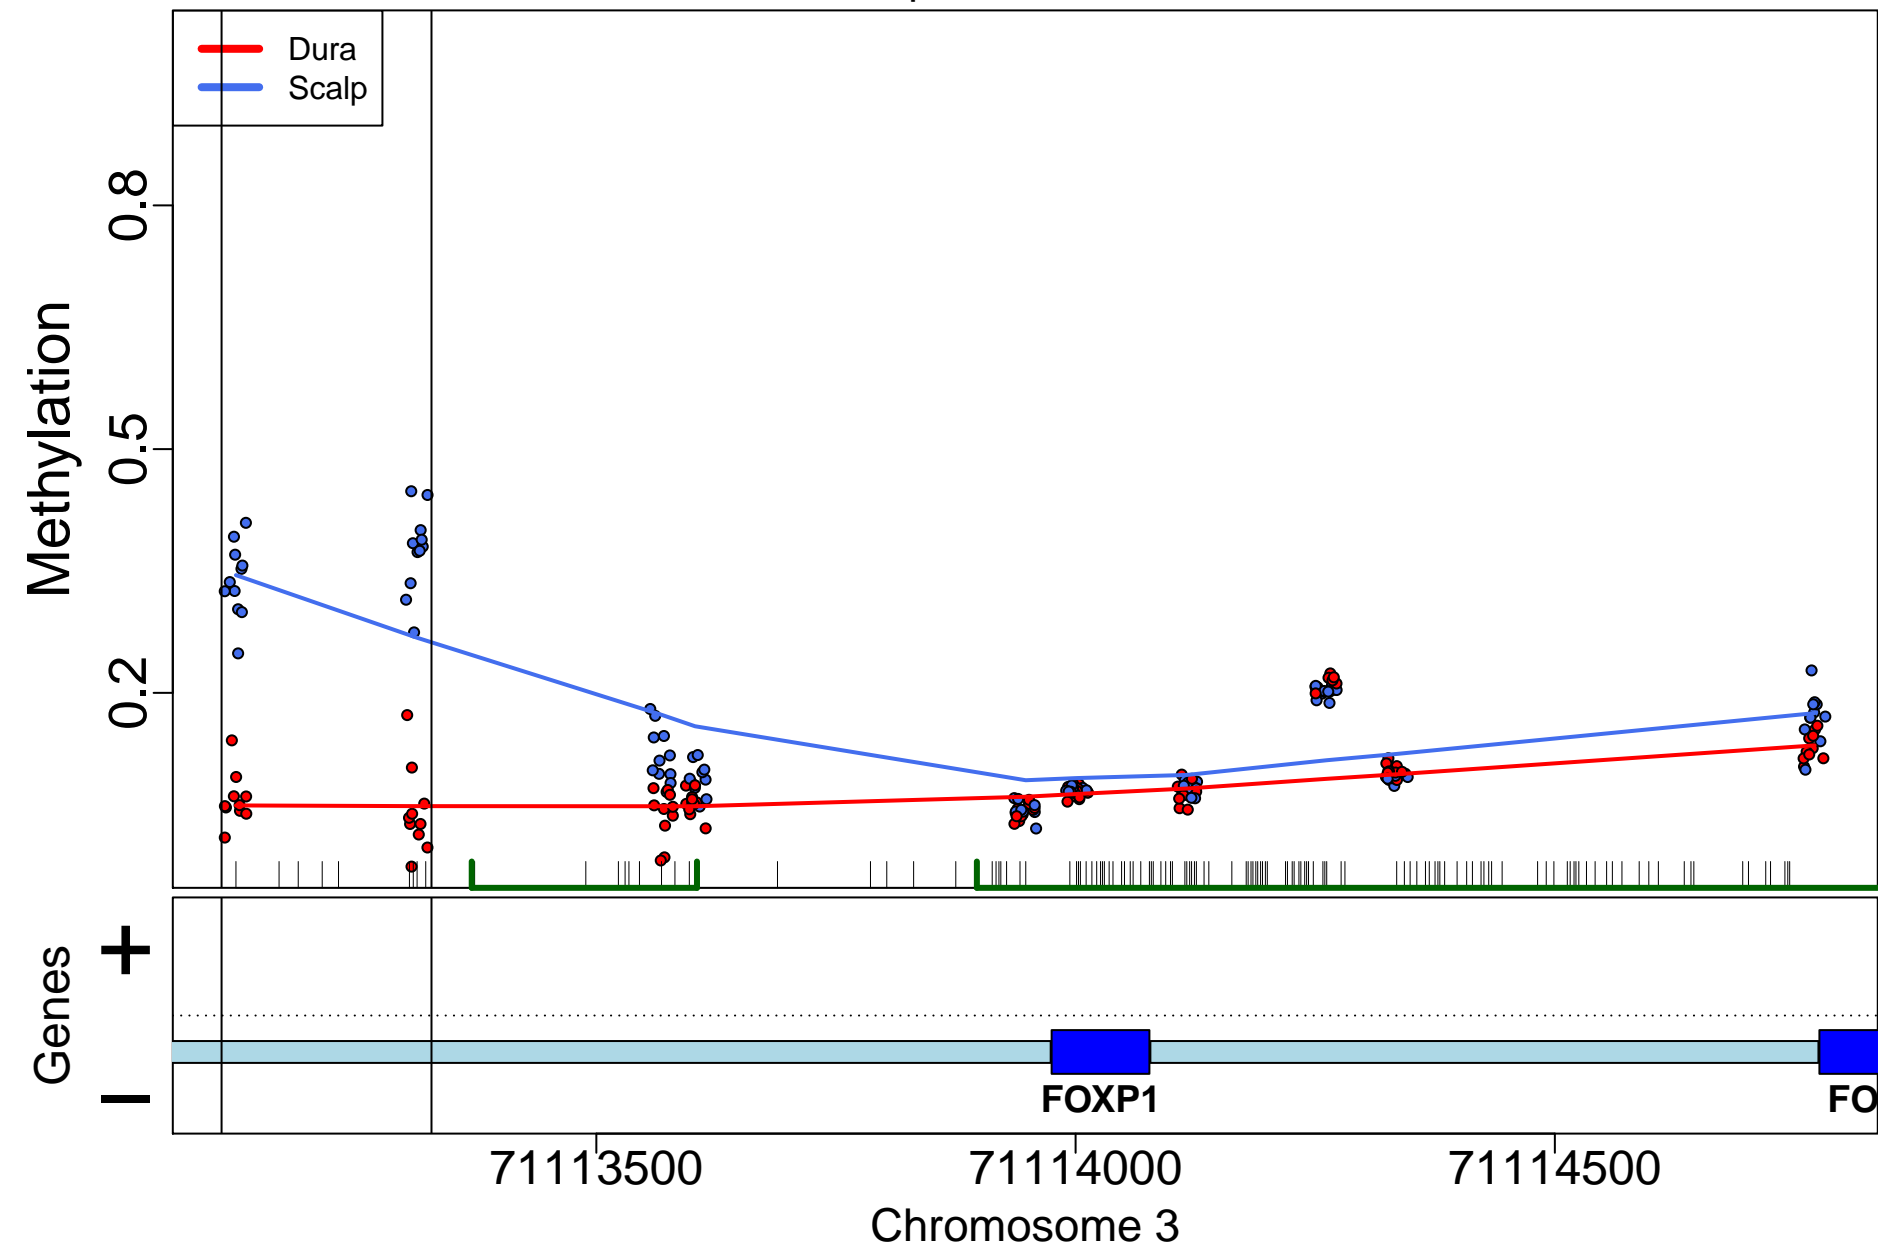

FOXA1; 27755bp from tss:upstream

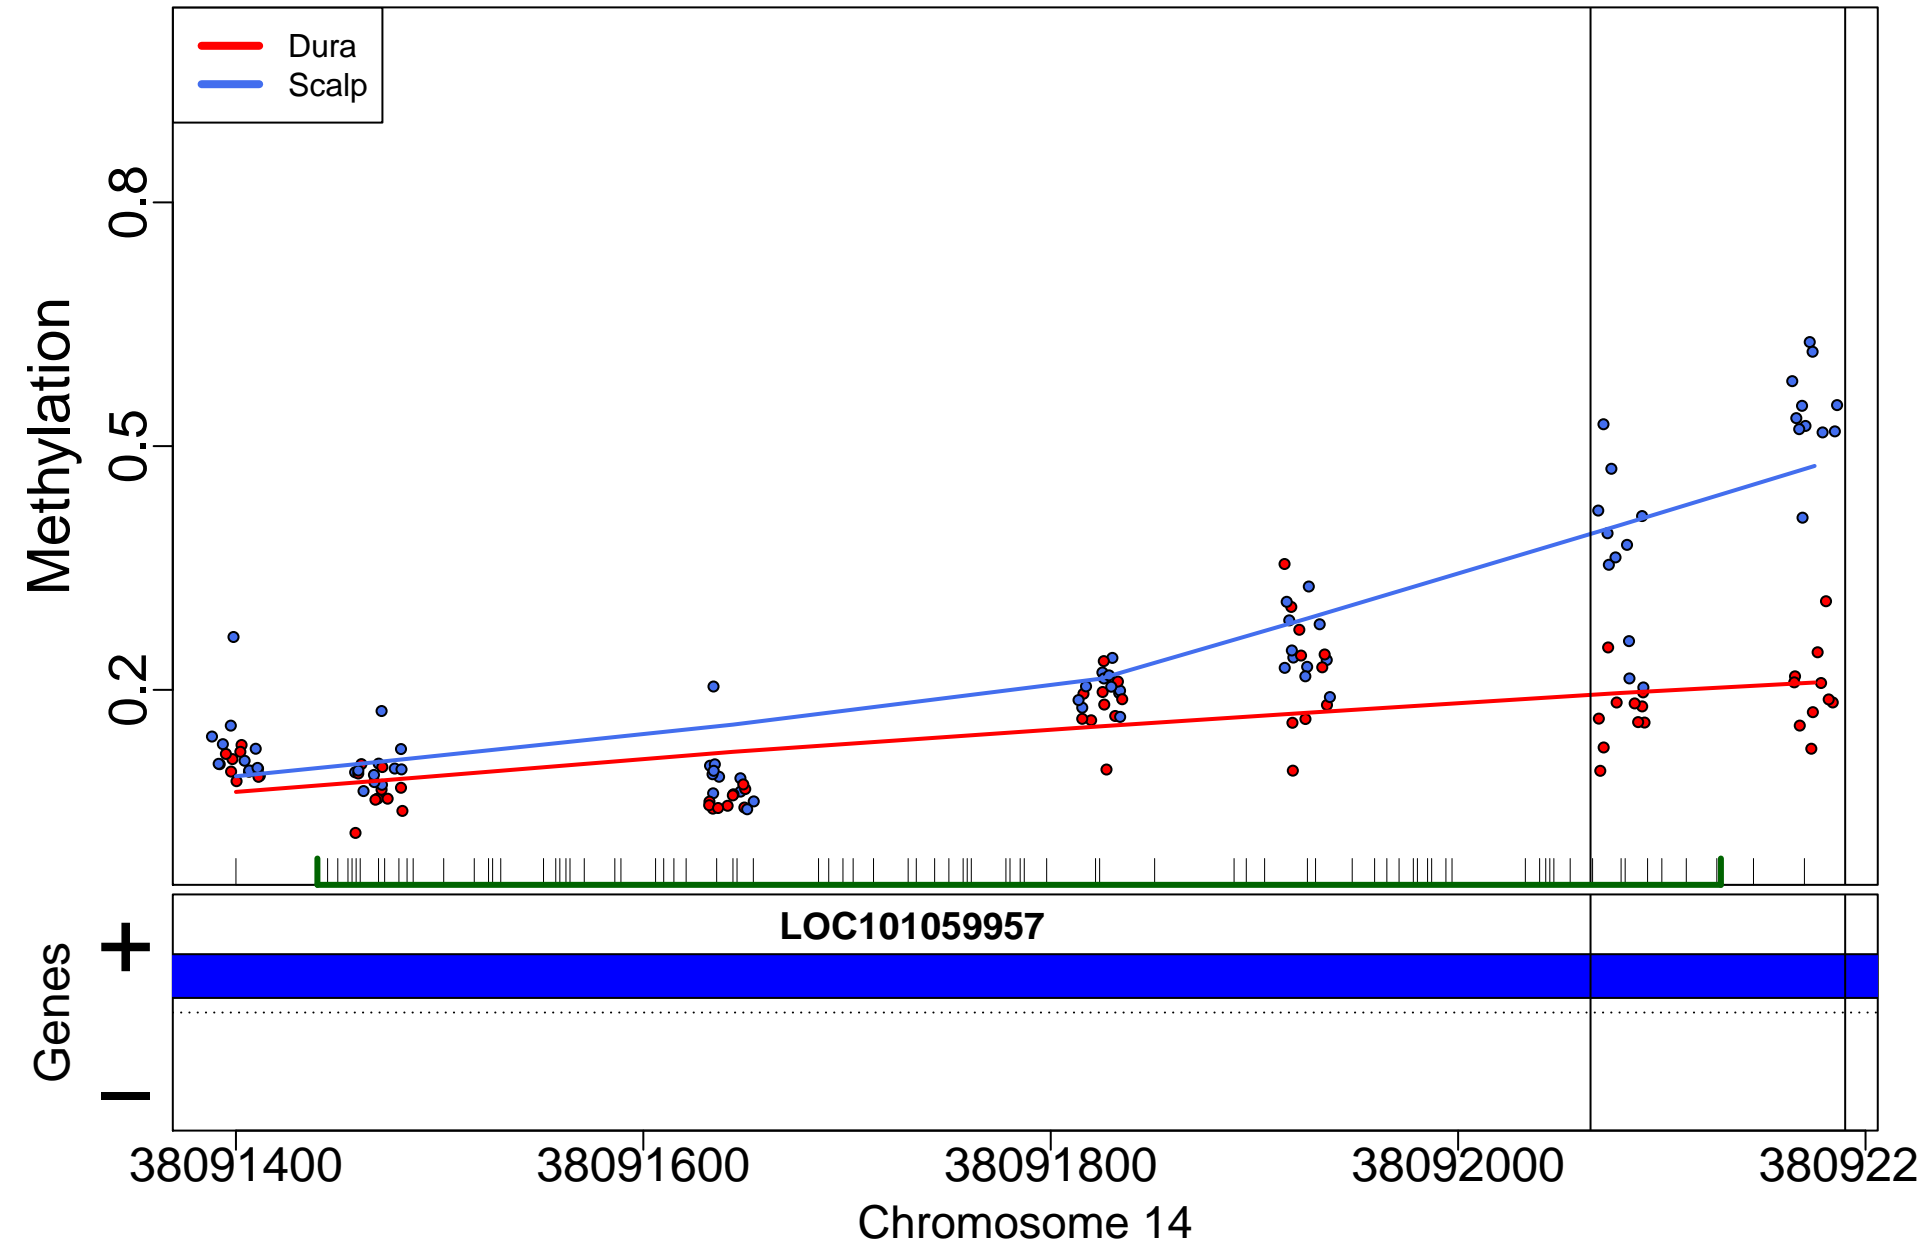

SOX11; 3054bp from tss:inside exon

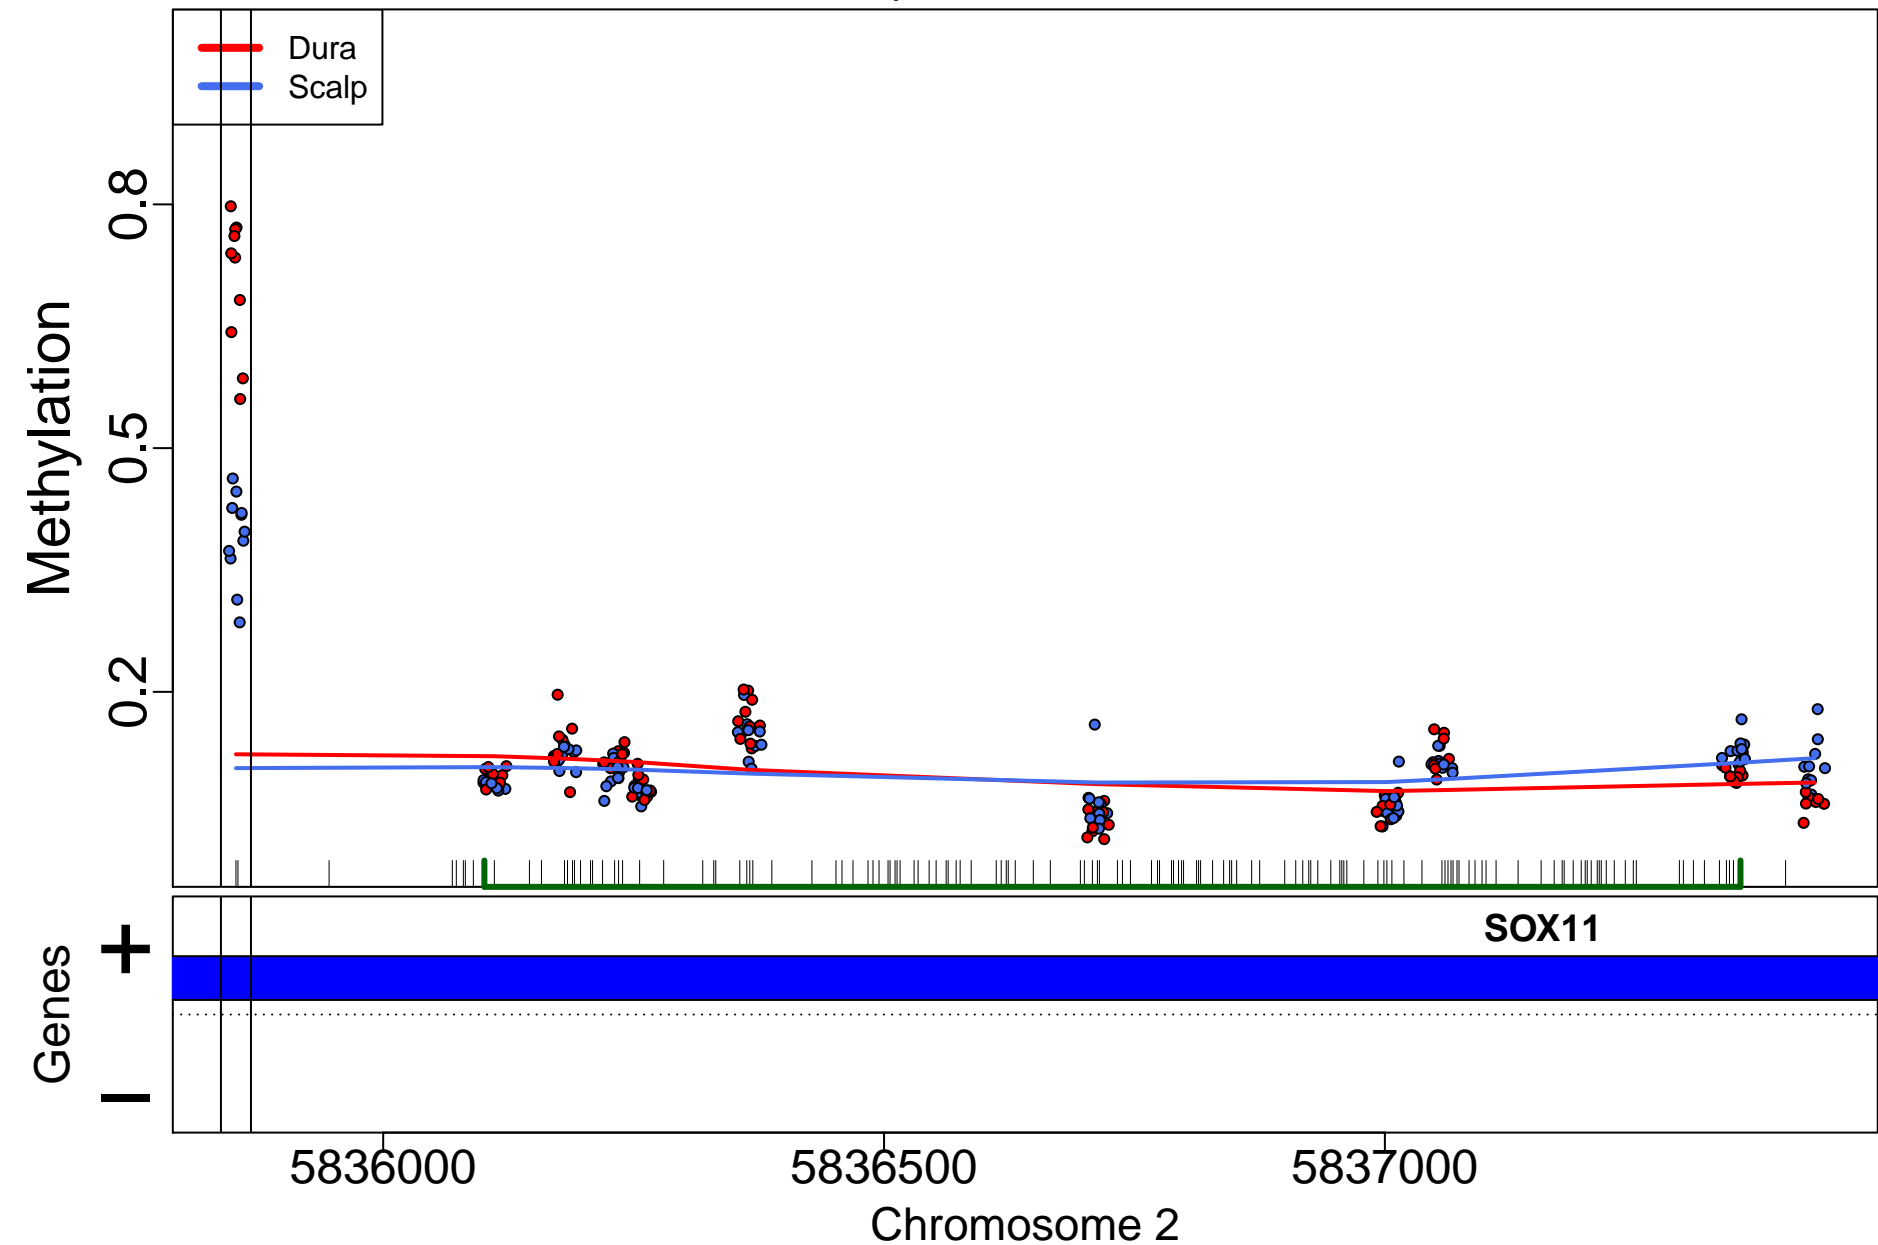

CCDC177; 2338bp from tss:inside exon

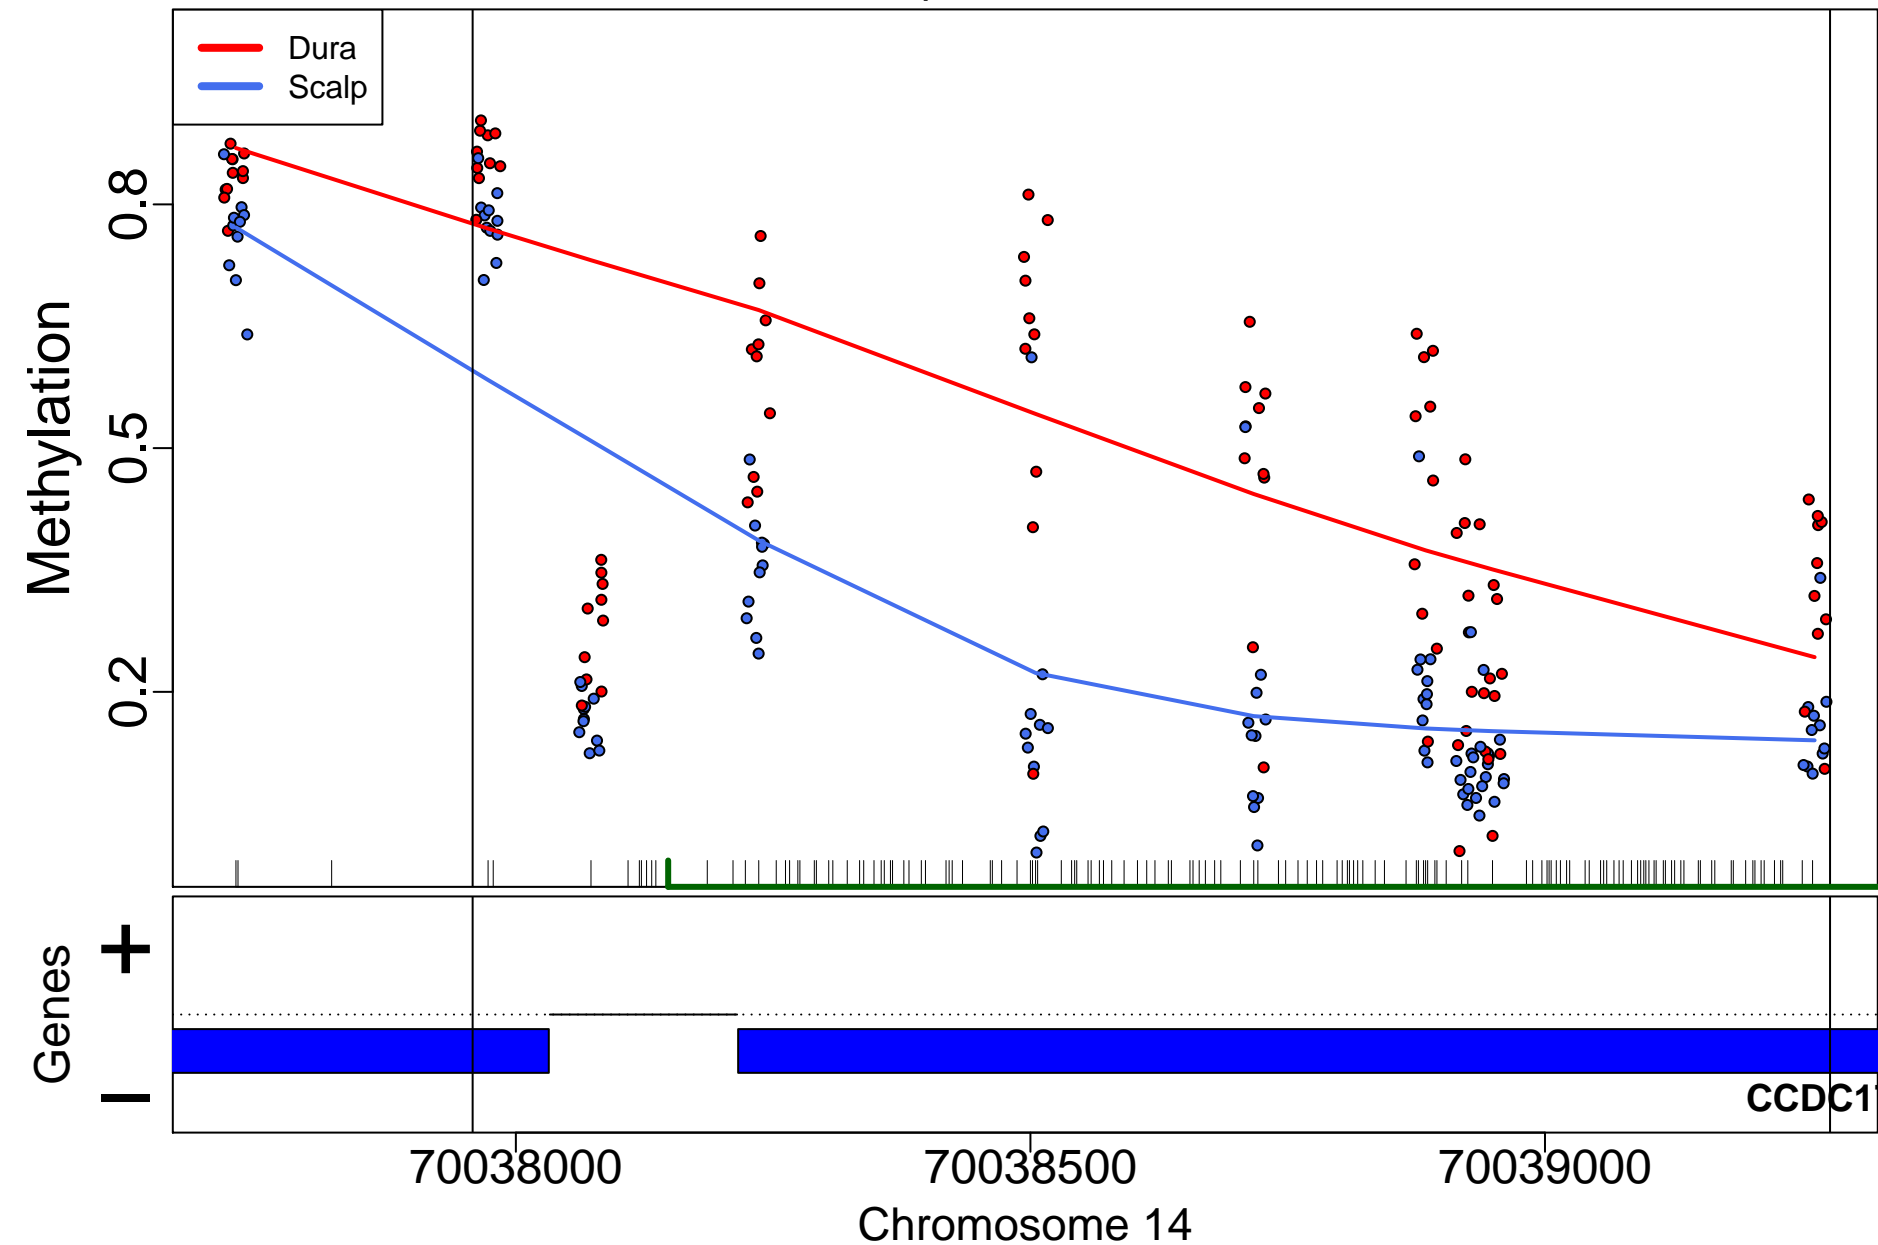

IRX3; 1443bp from tss:covers exon(s)

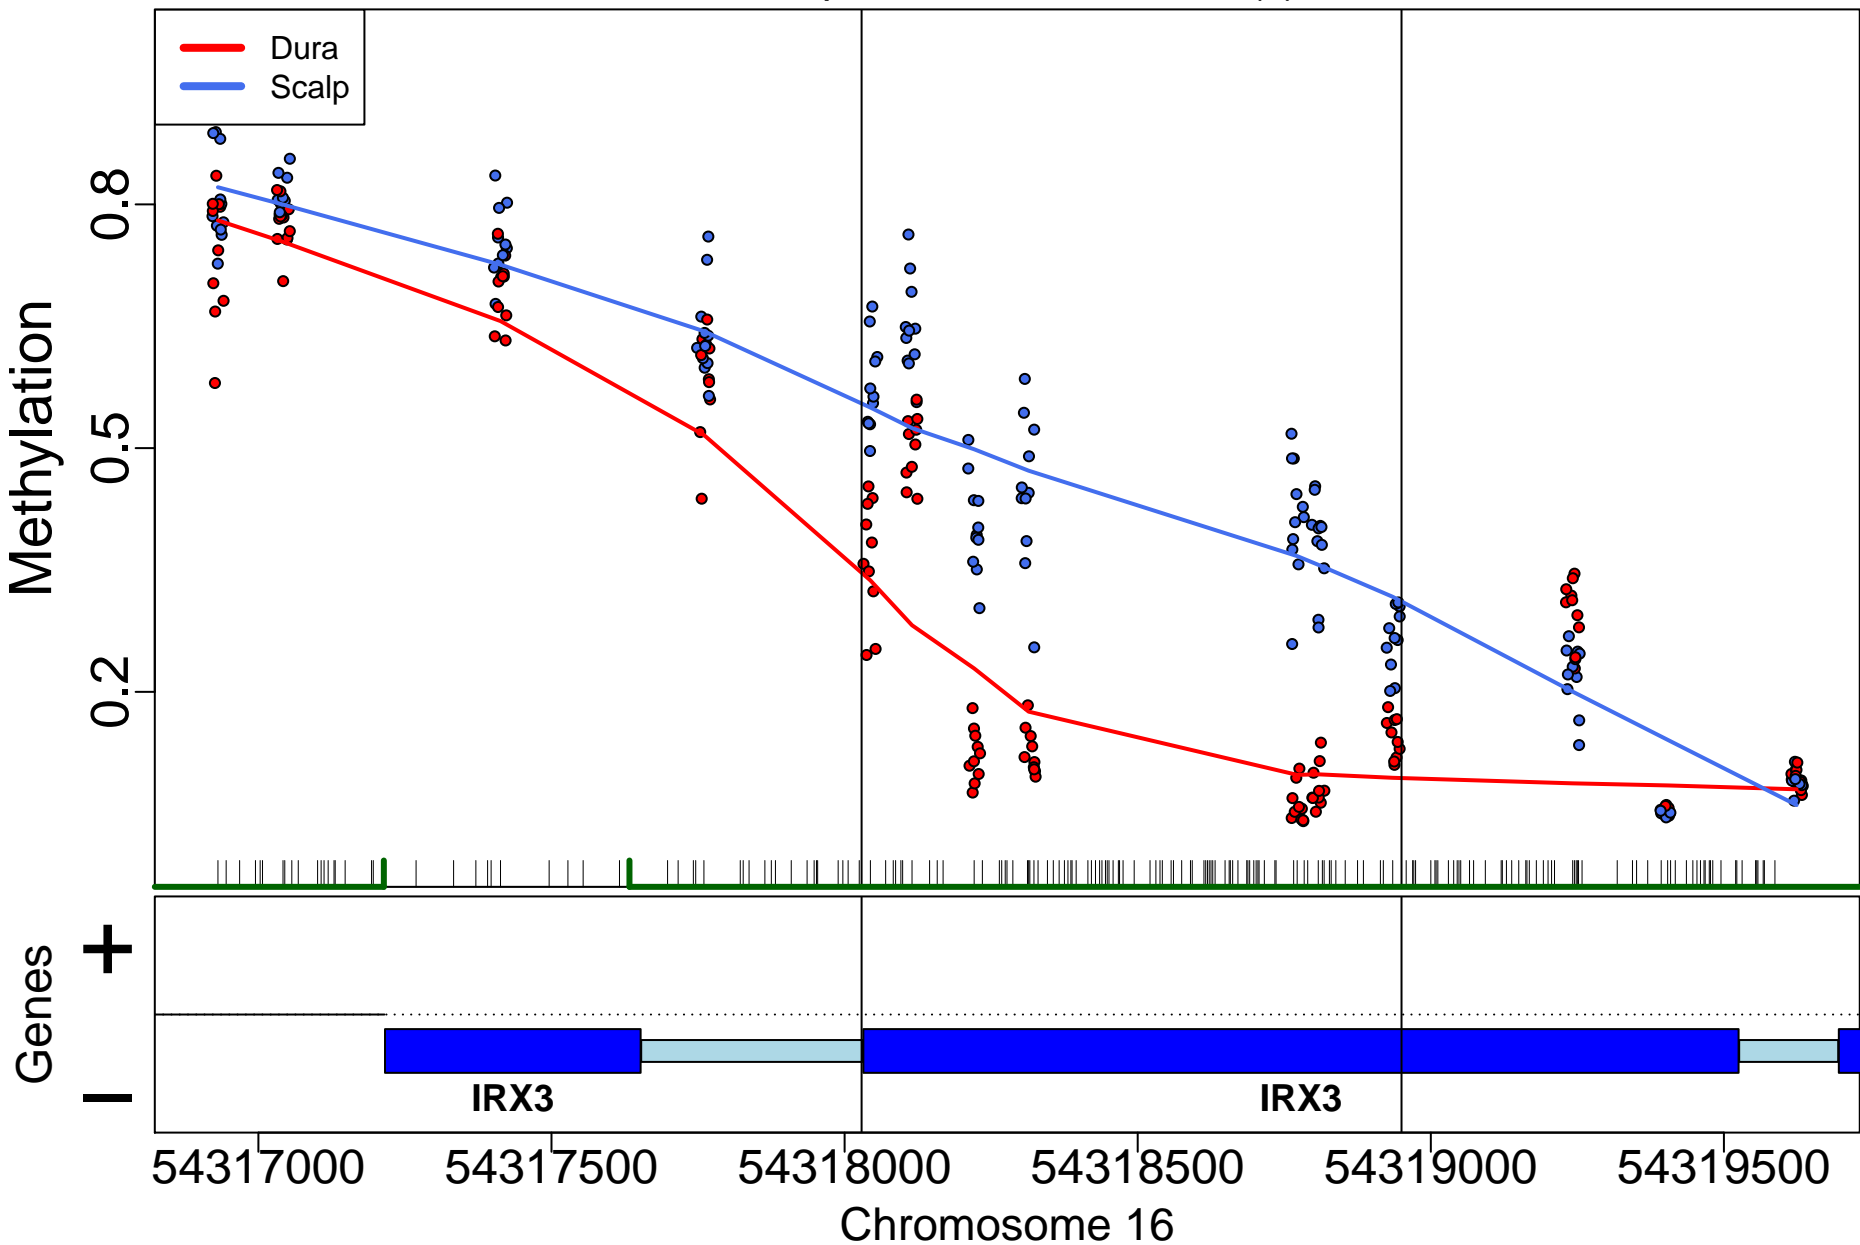

# CPE; 591bp from tss:inside intron

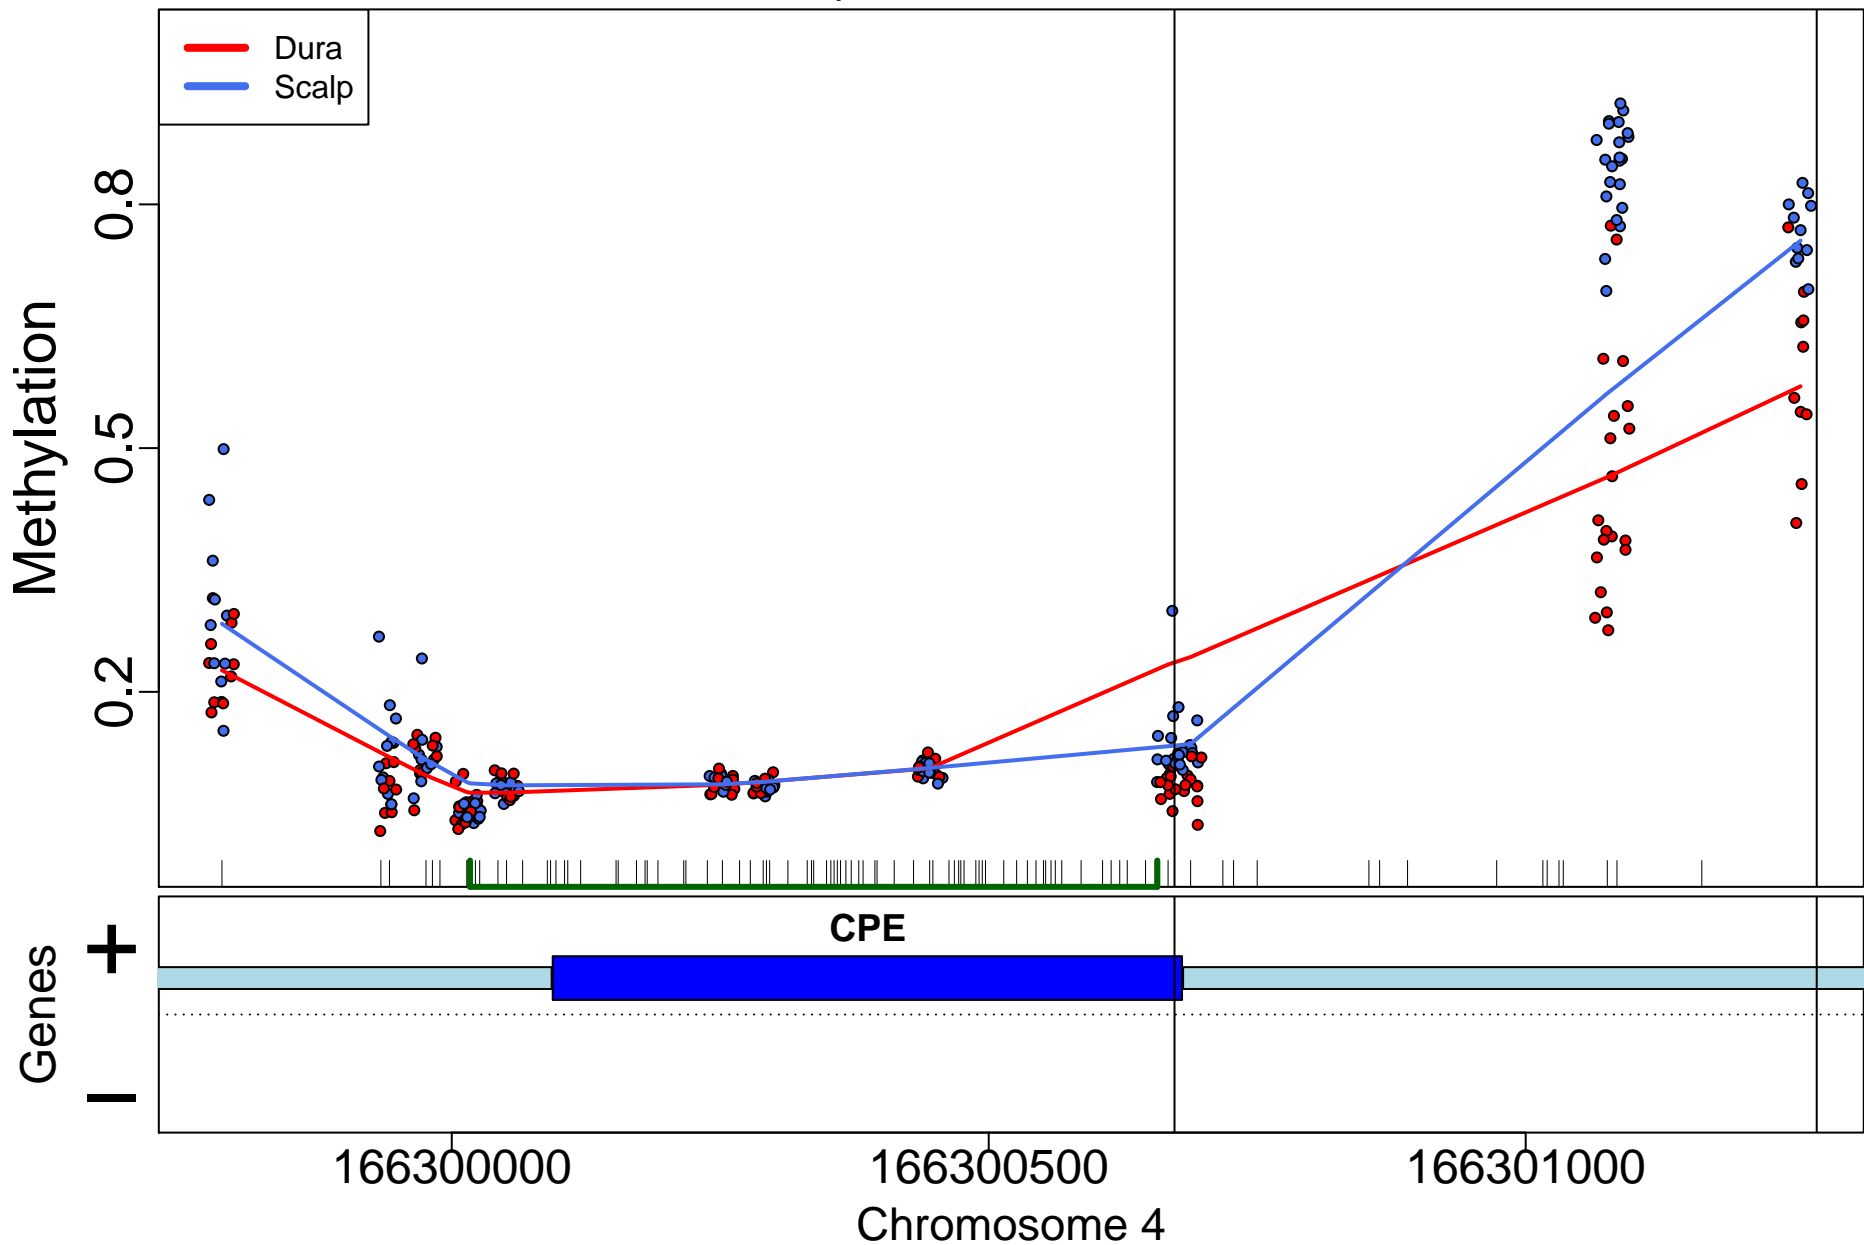



# SLMAP; 203bp from tss:overlaps exon downstream

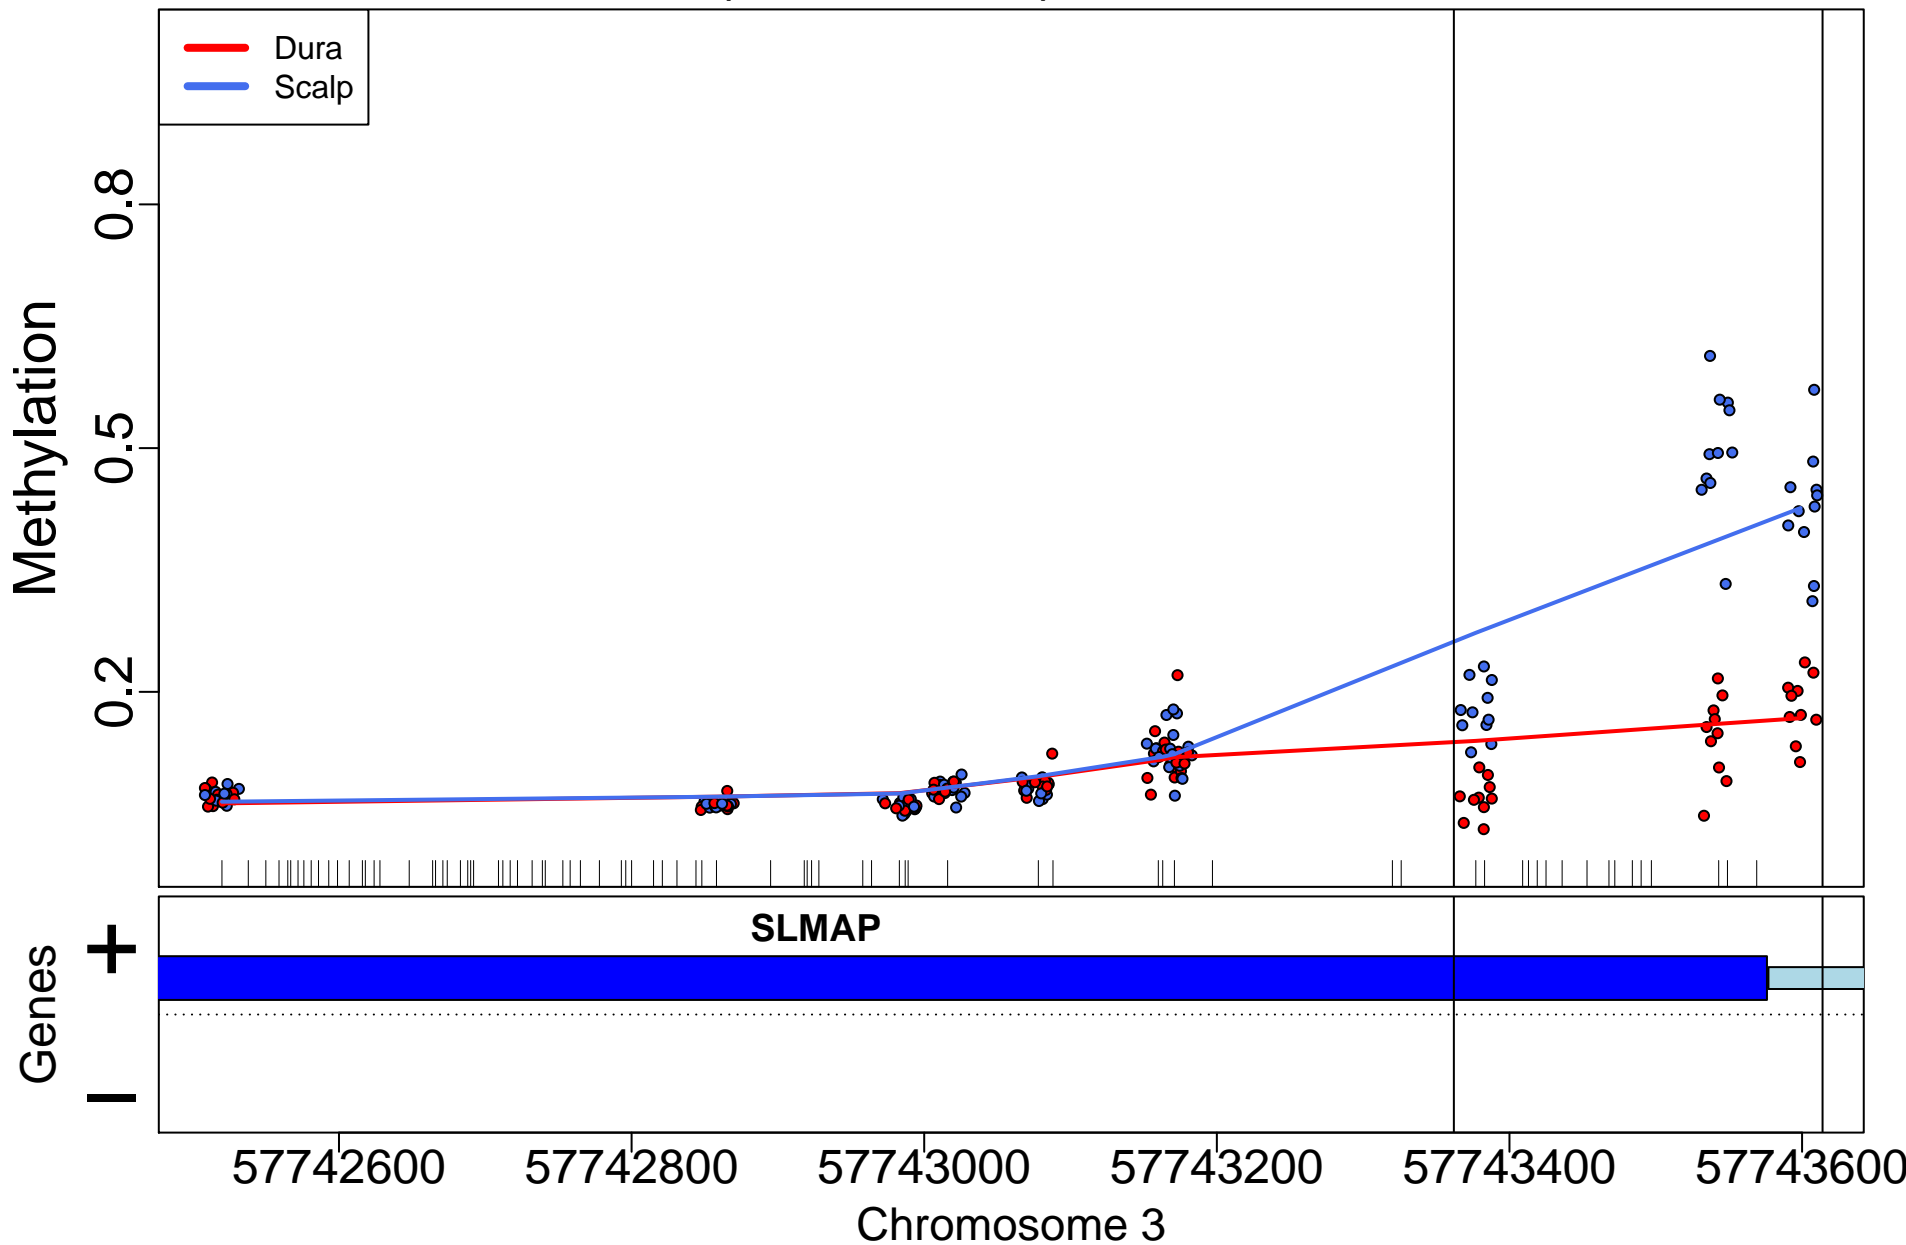

# HOXA3; 4890bp from tss:inside intron

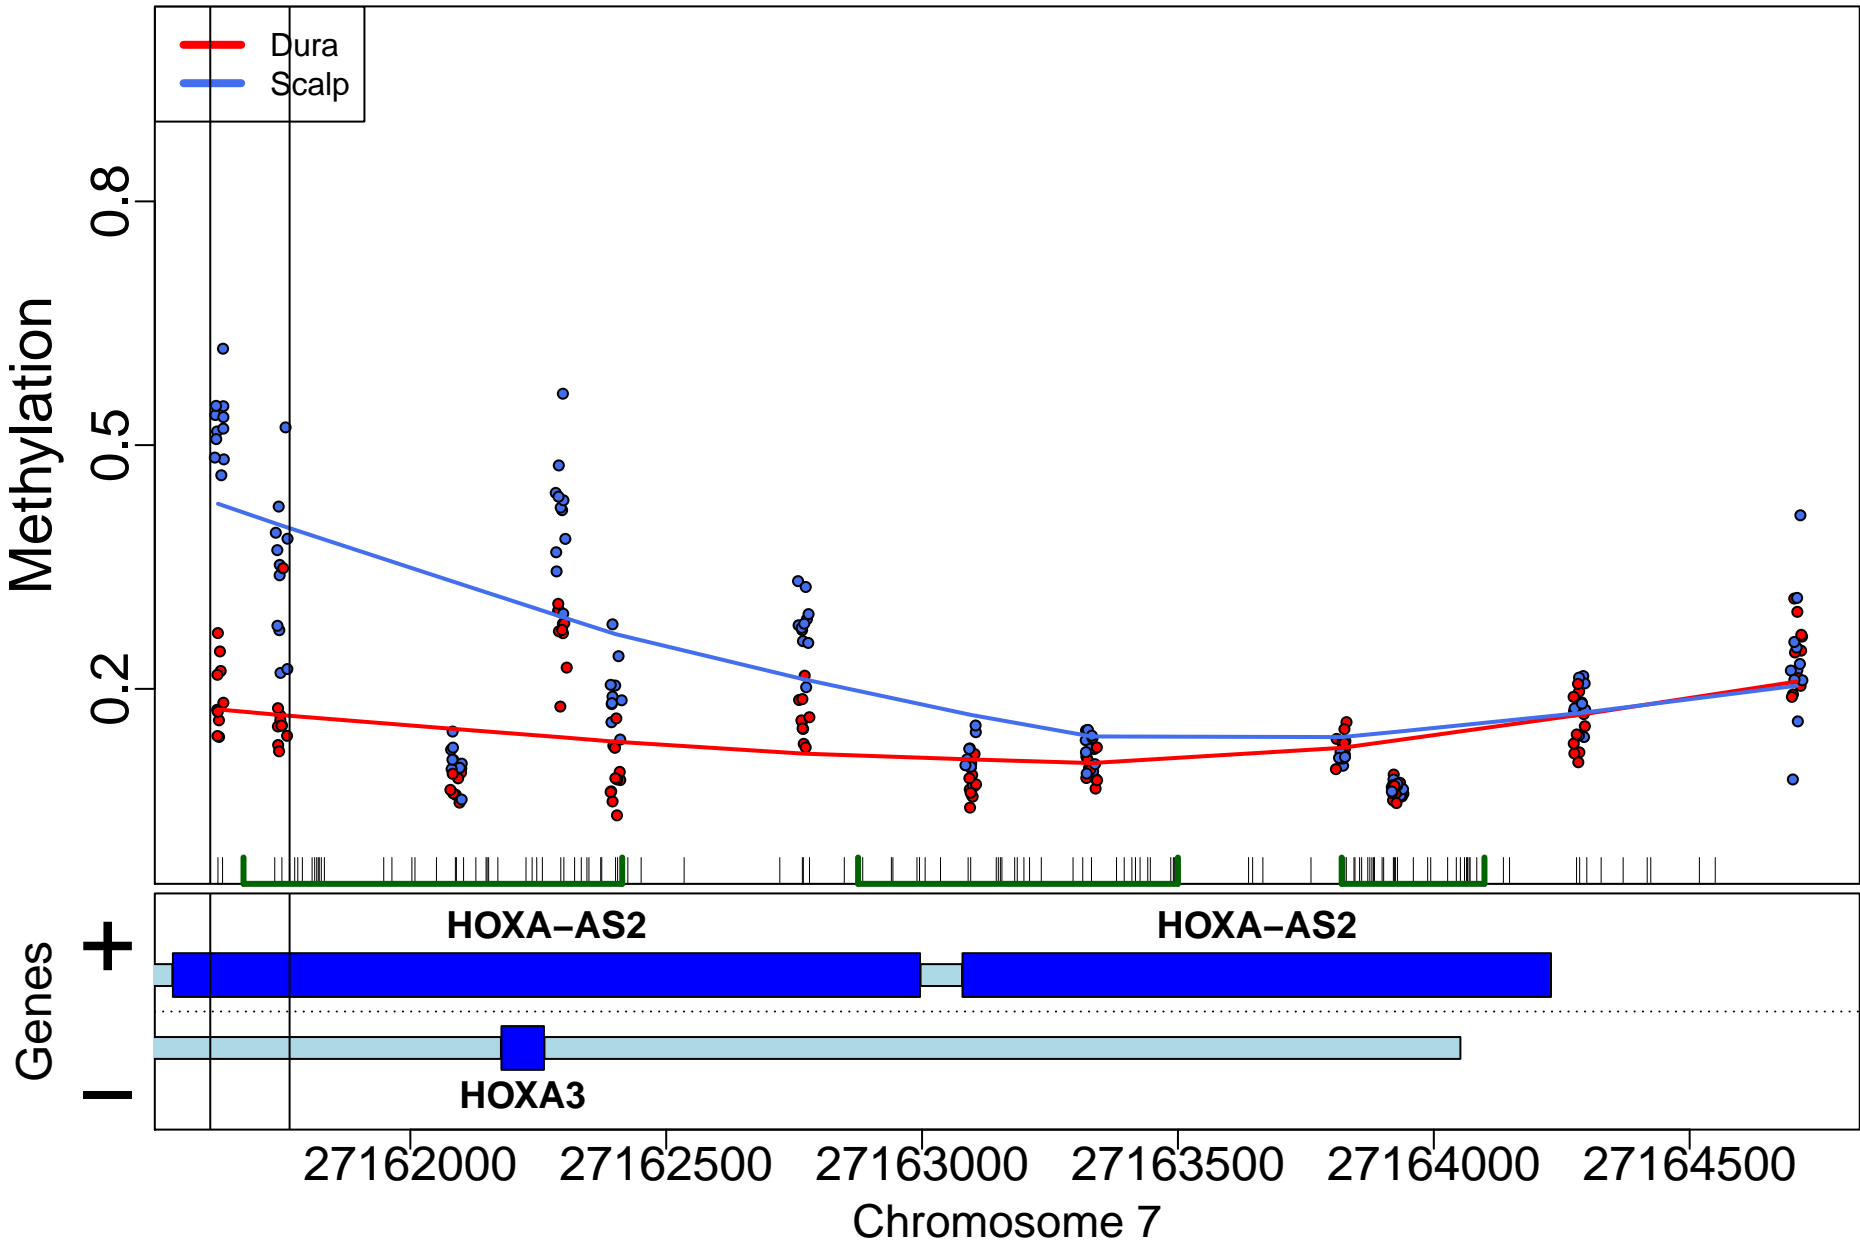

FLJ30679; 960bp from tss:inside exon

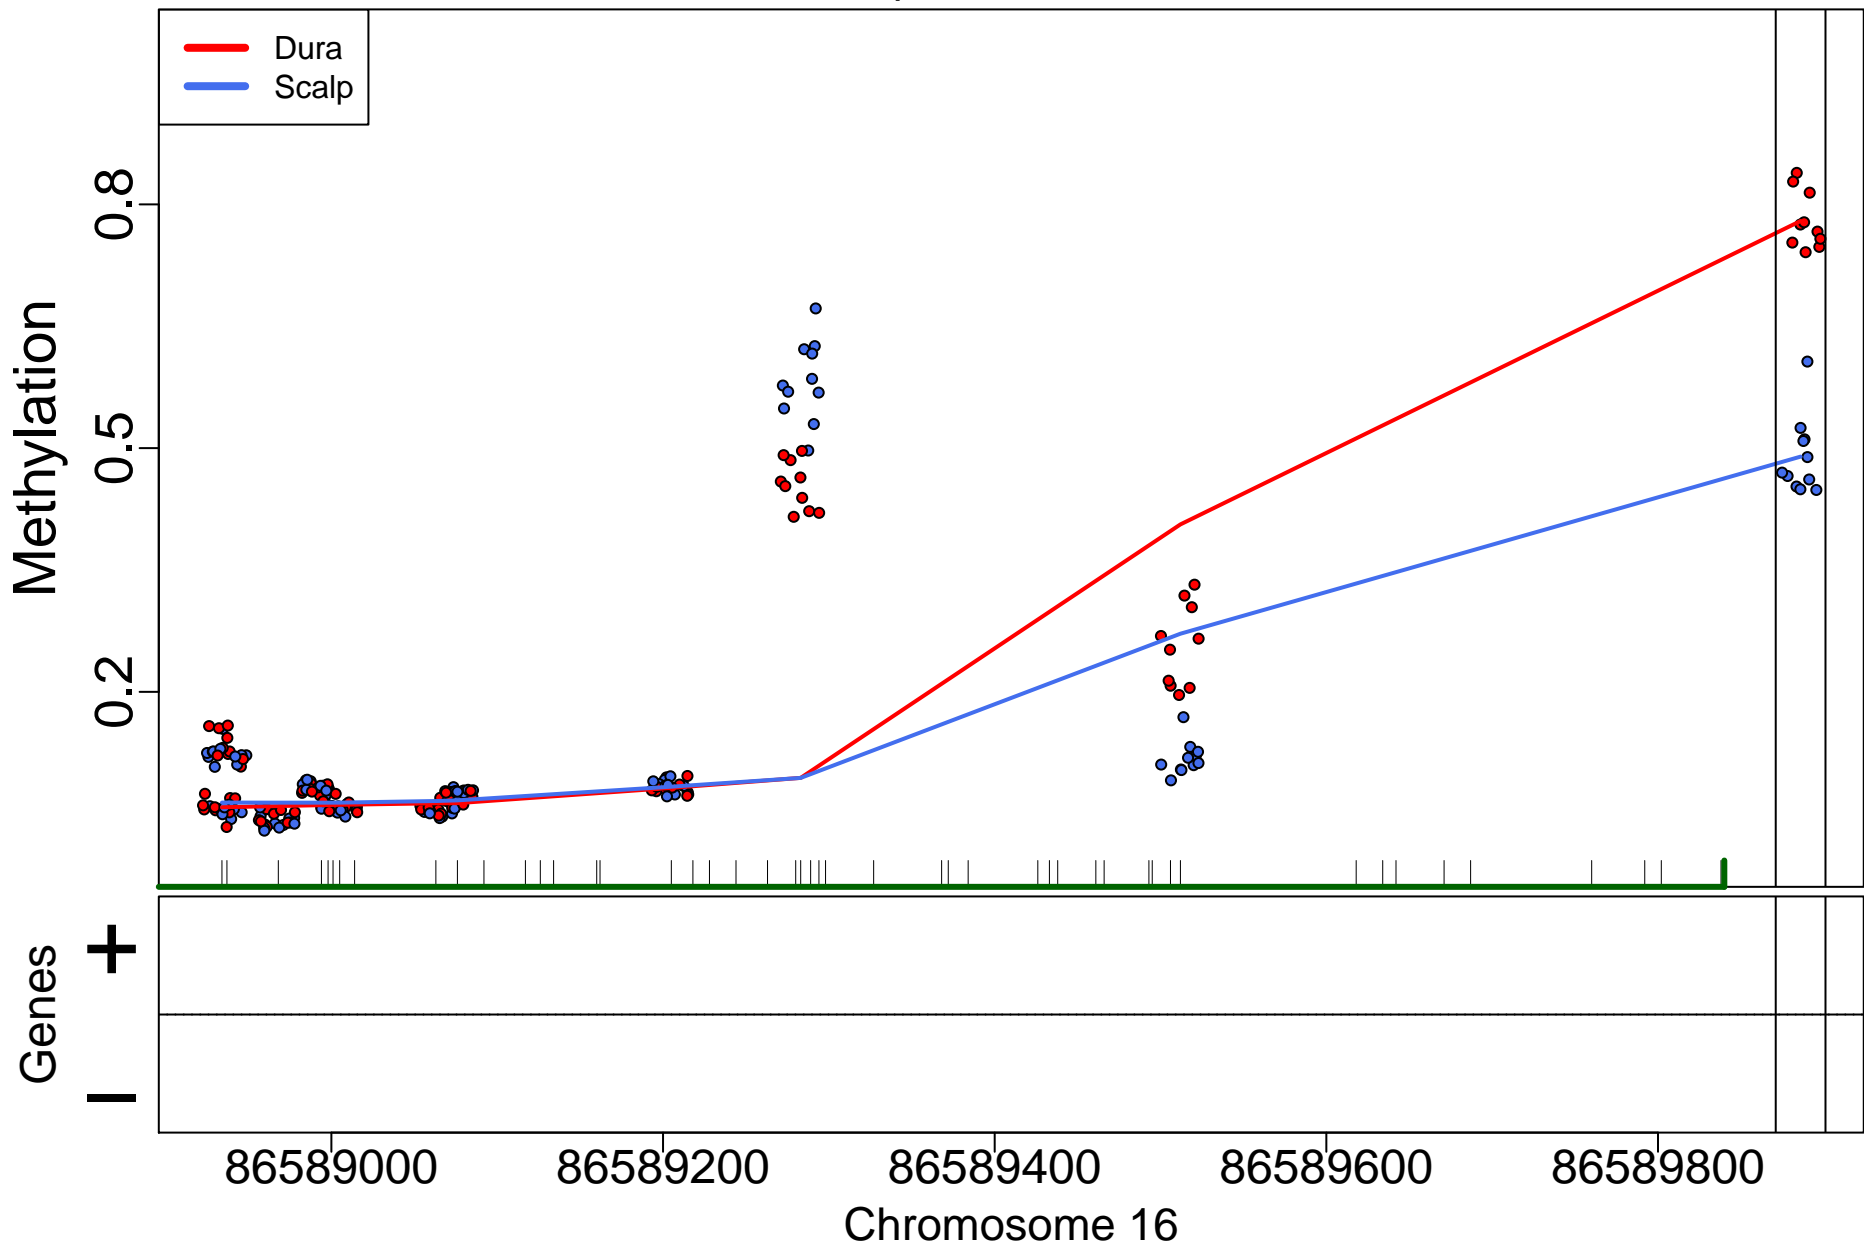

TFRC; 561bp from tss:promoter

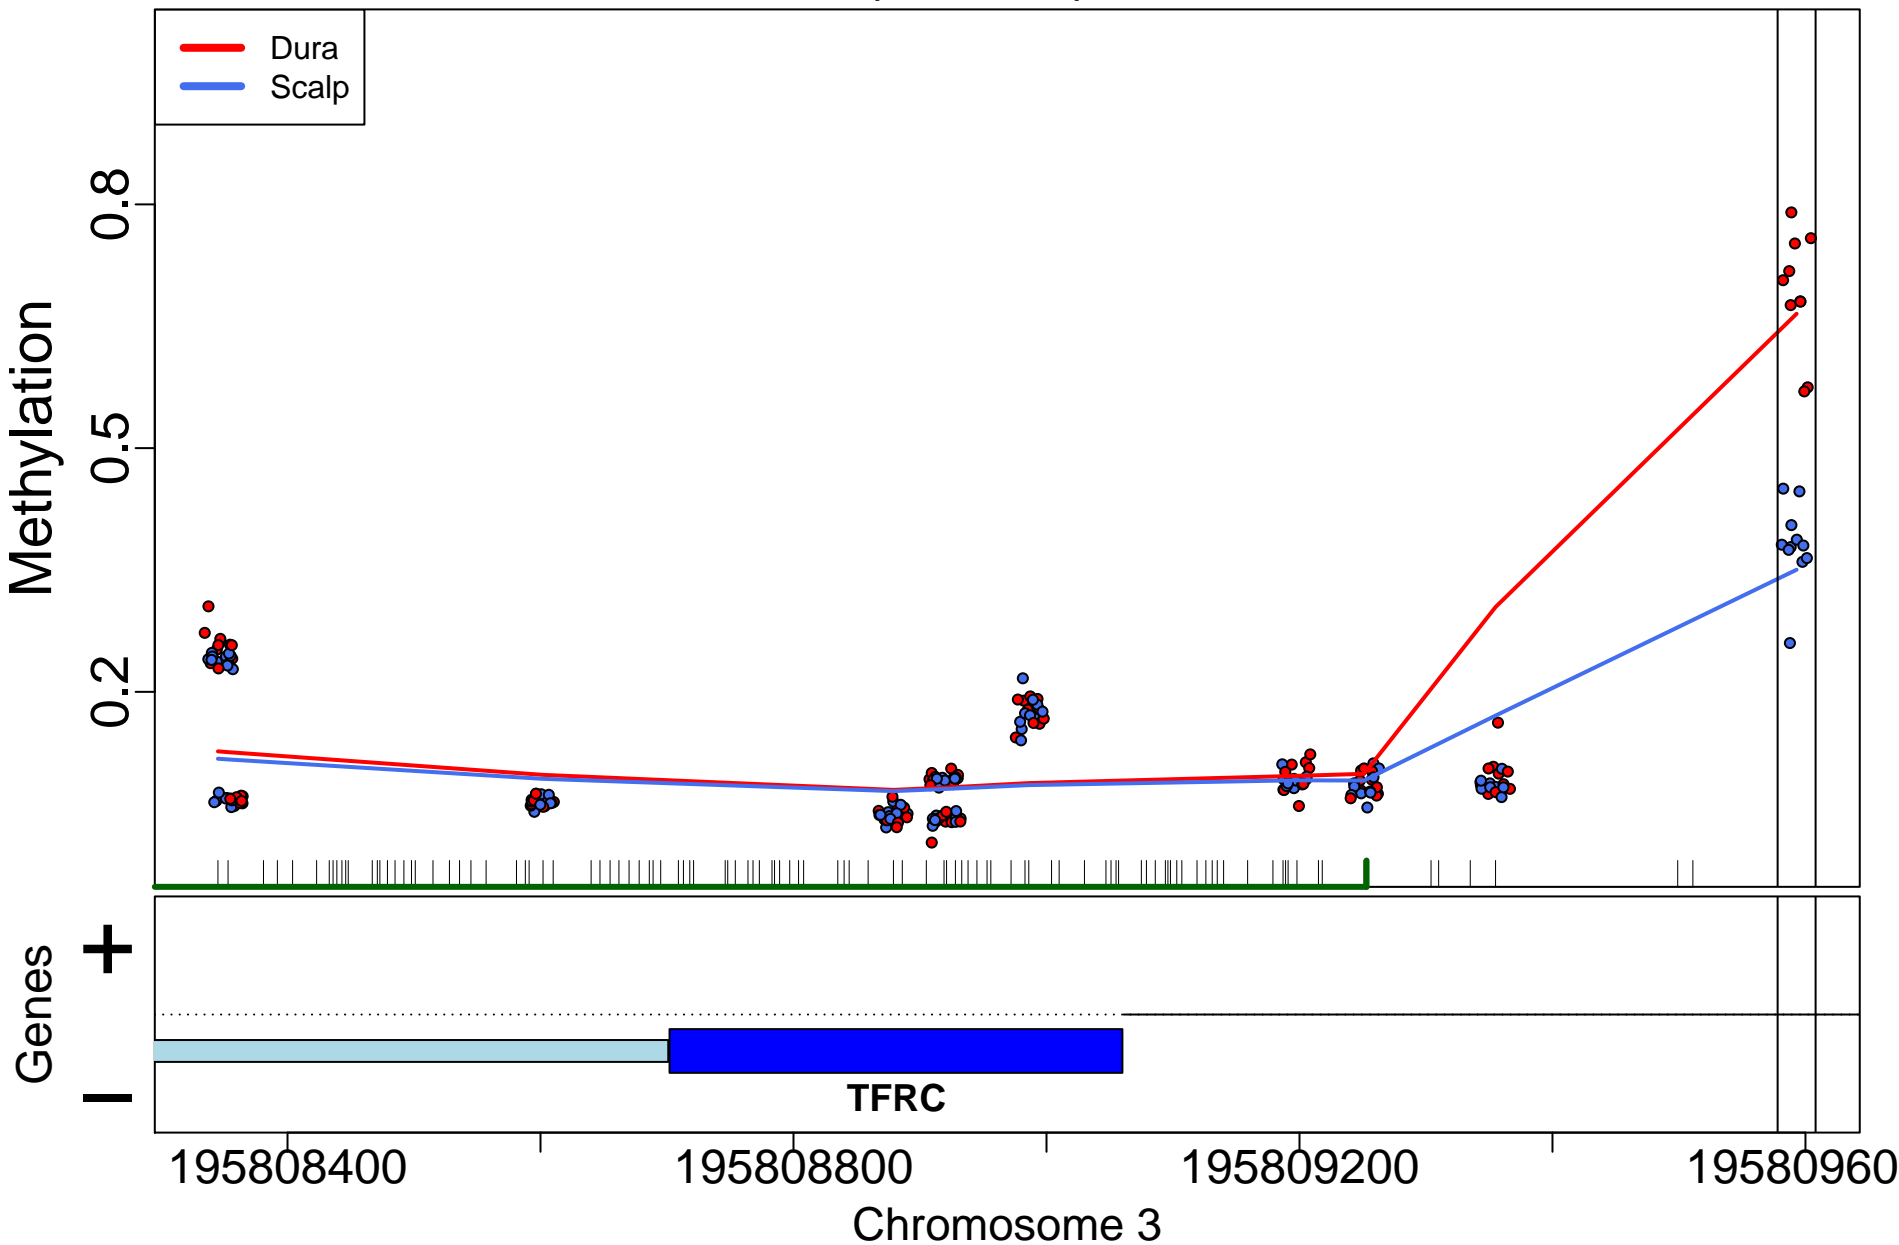

# GAREM; 821bp from tss:promoter

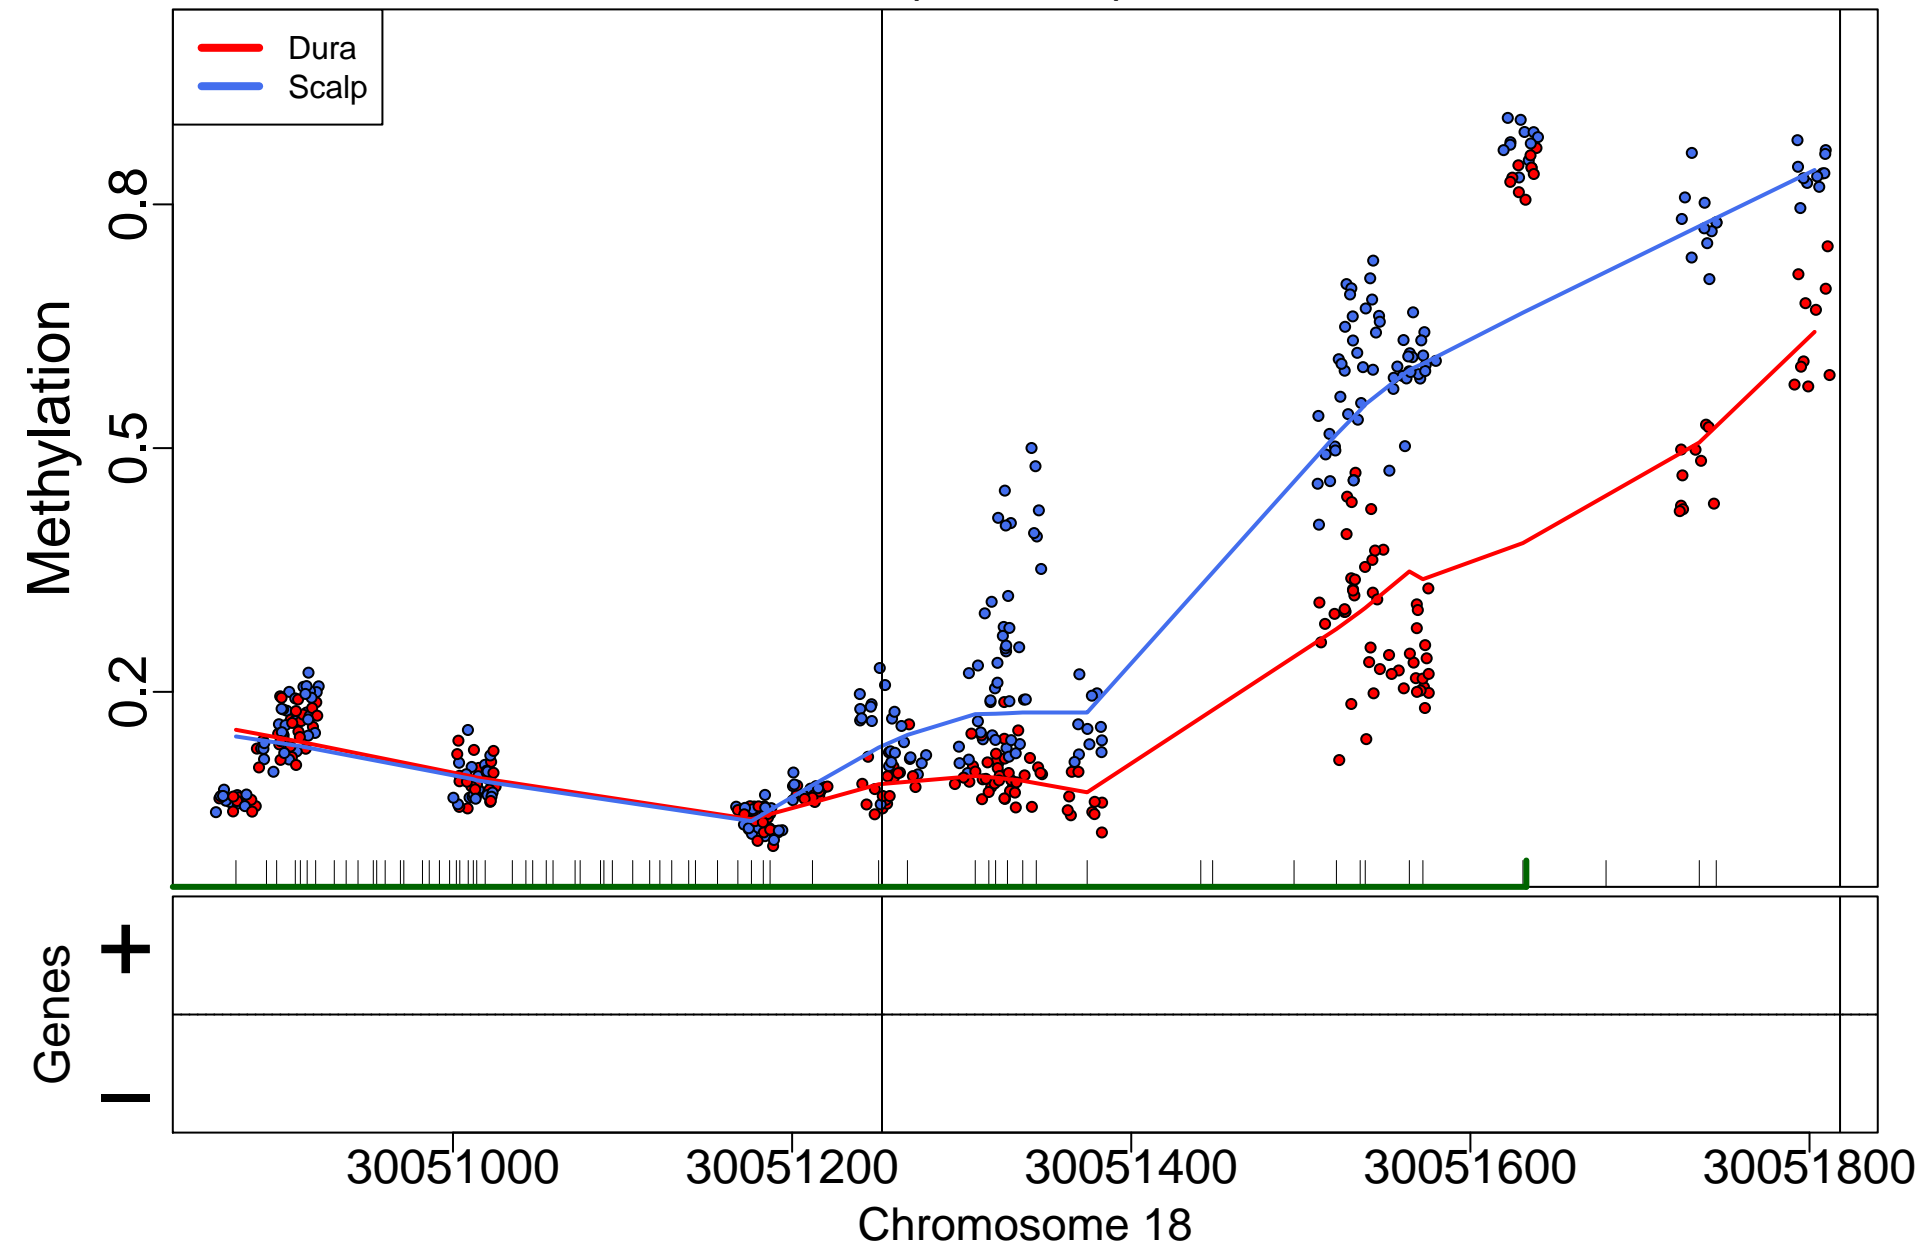

# KAZN; 5222bp from tss:inside intron

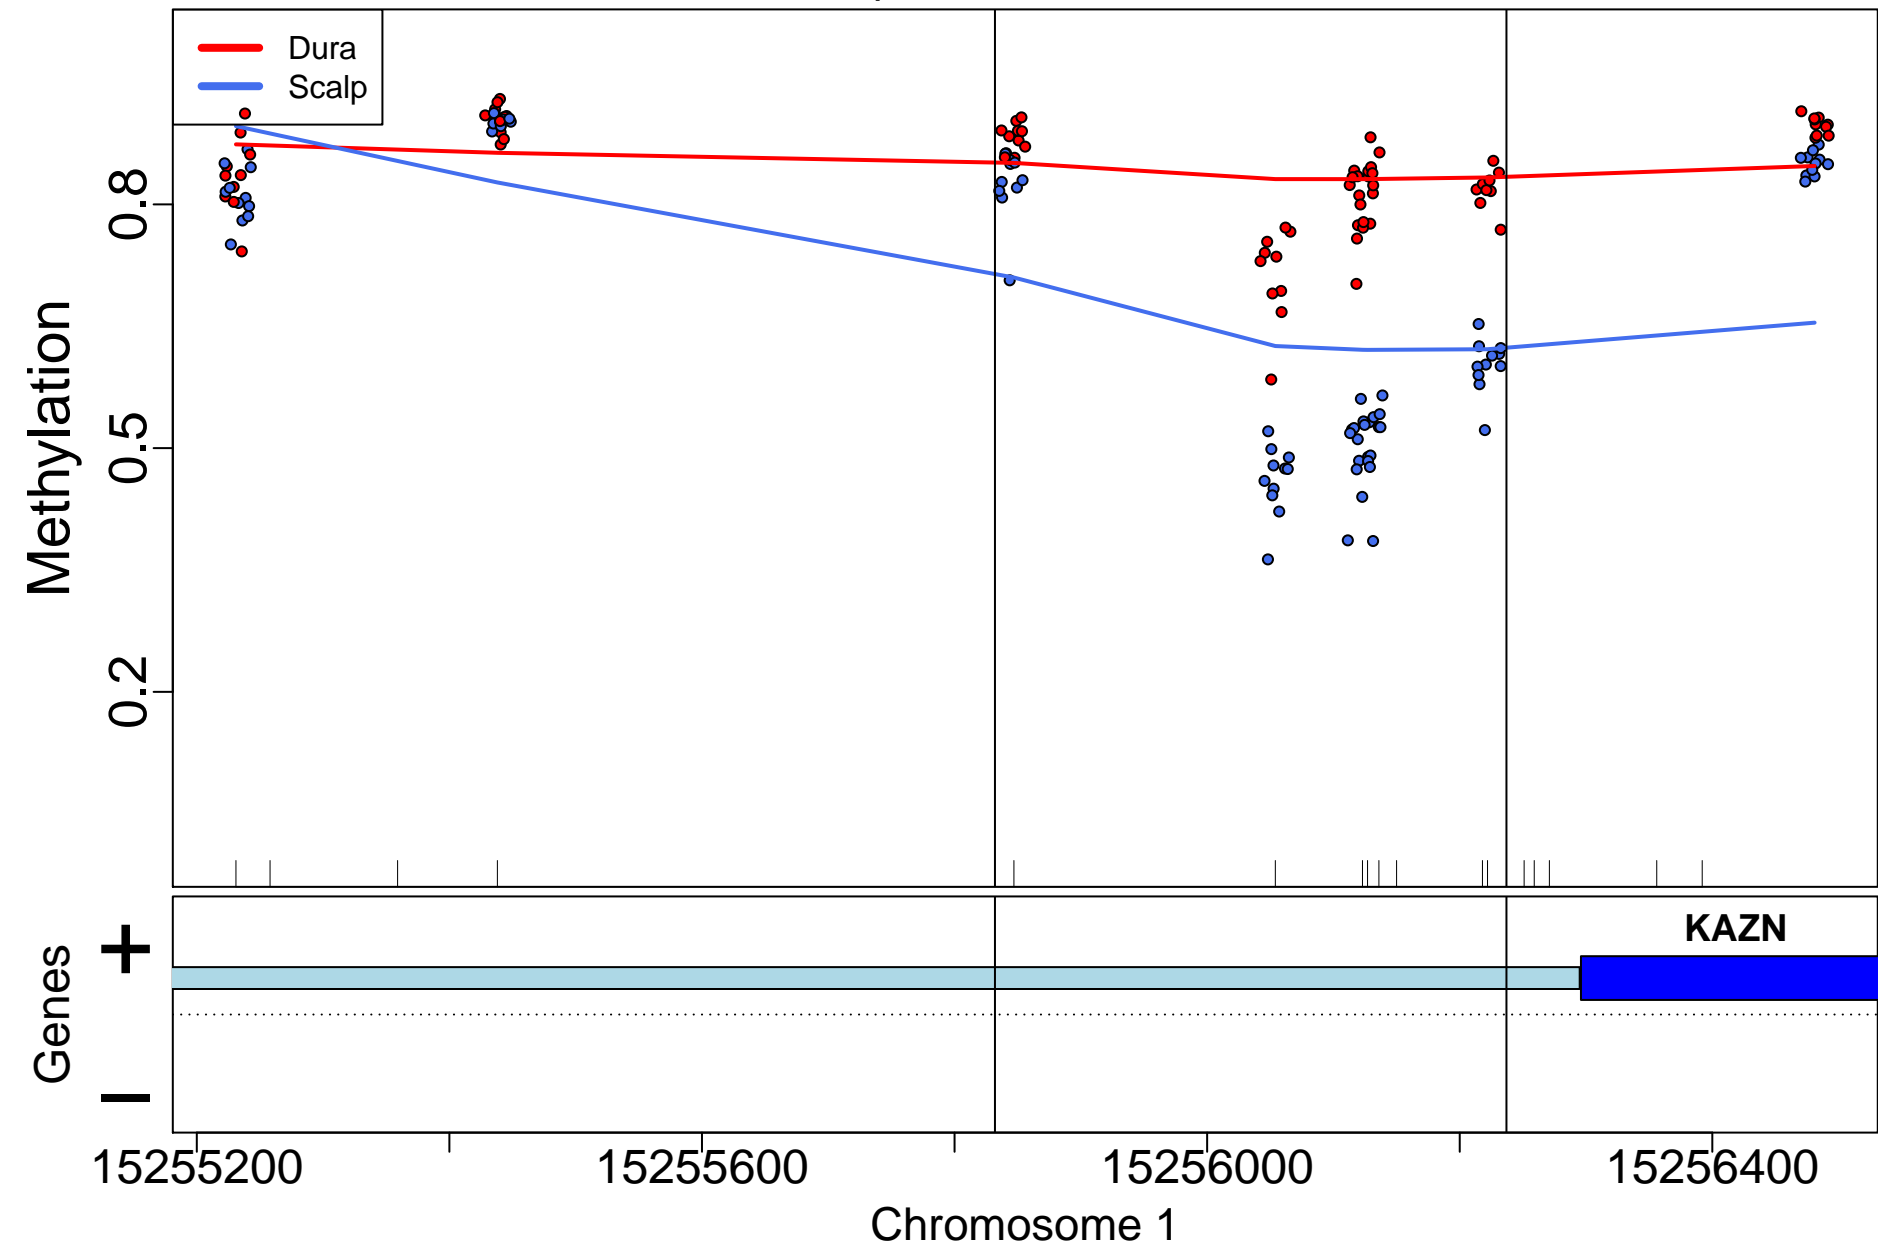

## ALDH3B2; 0bp from tss:overlaps 5'

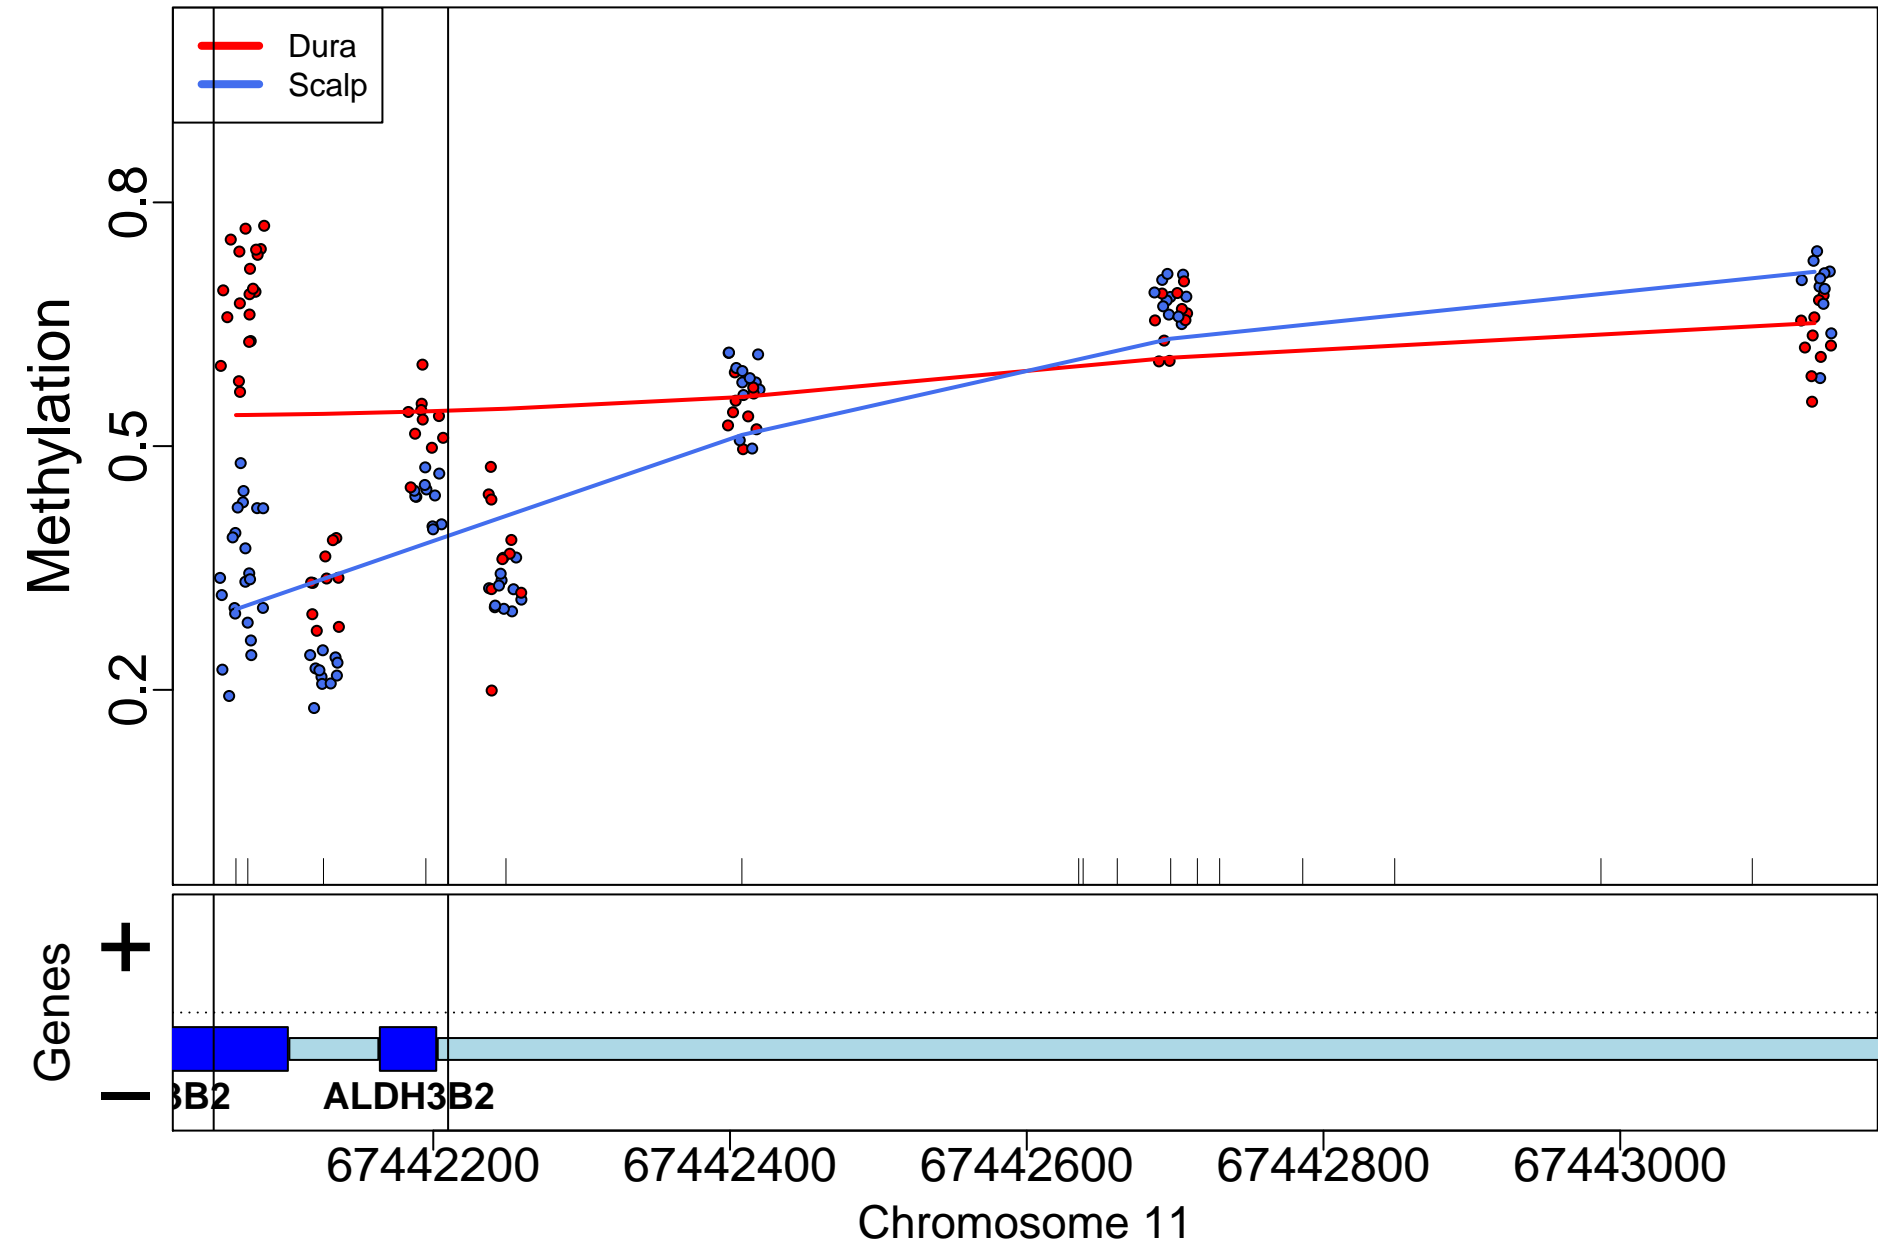

PTPN5; 150bp from tss:promoter

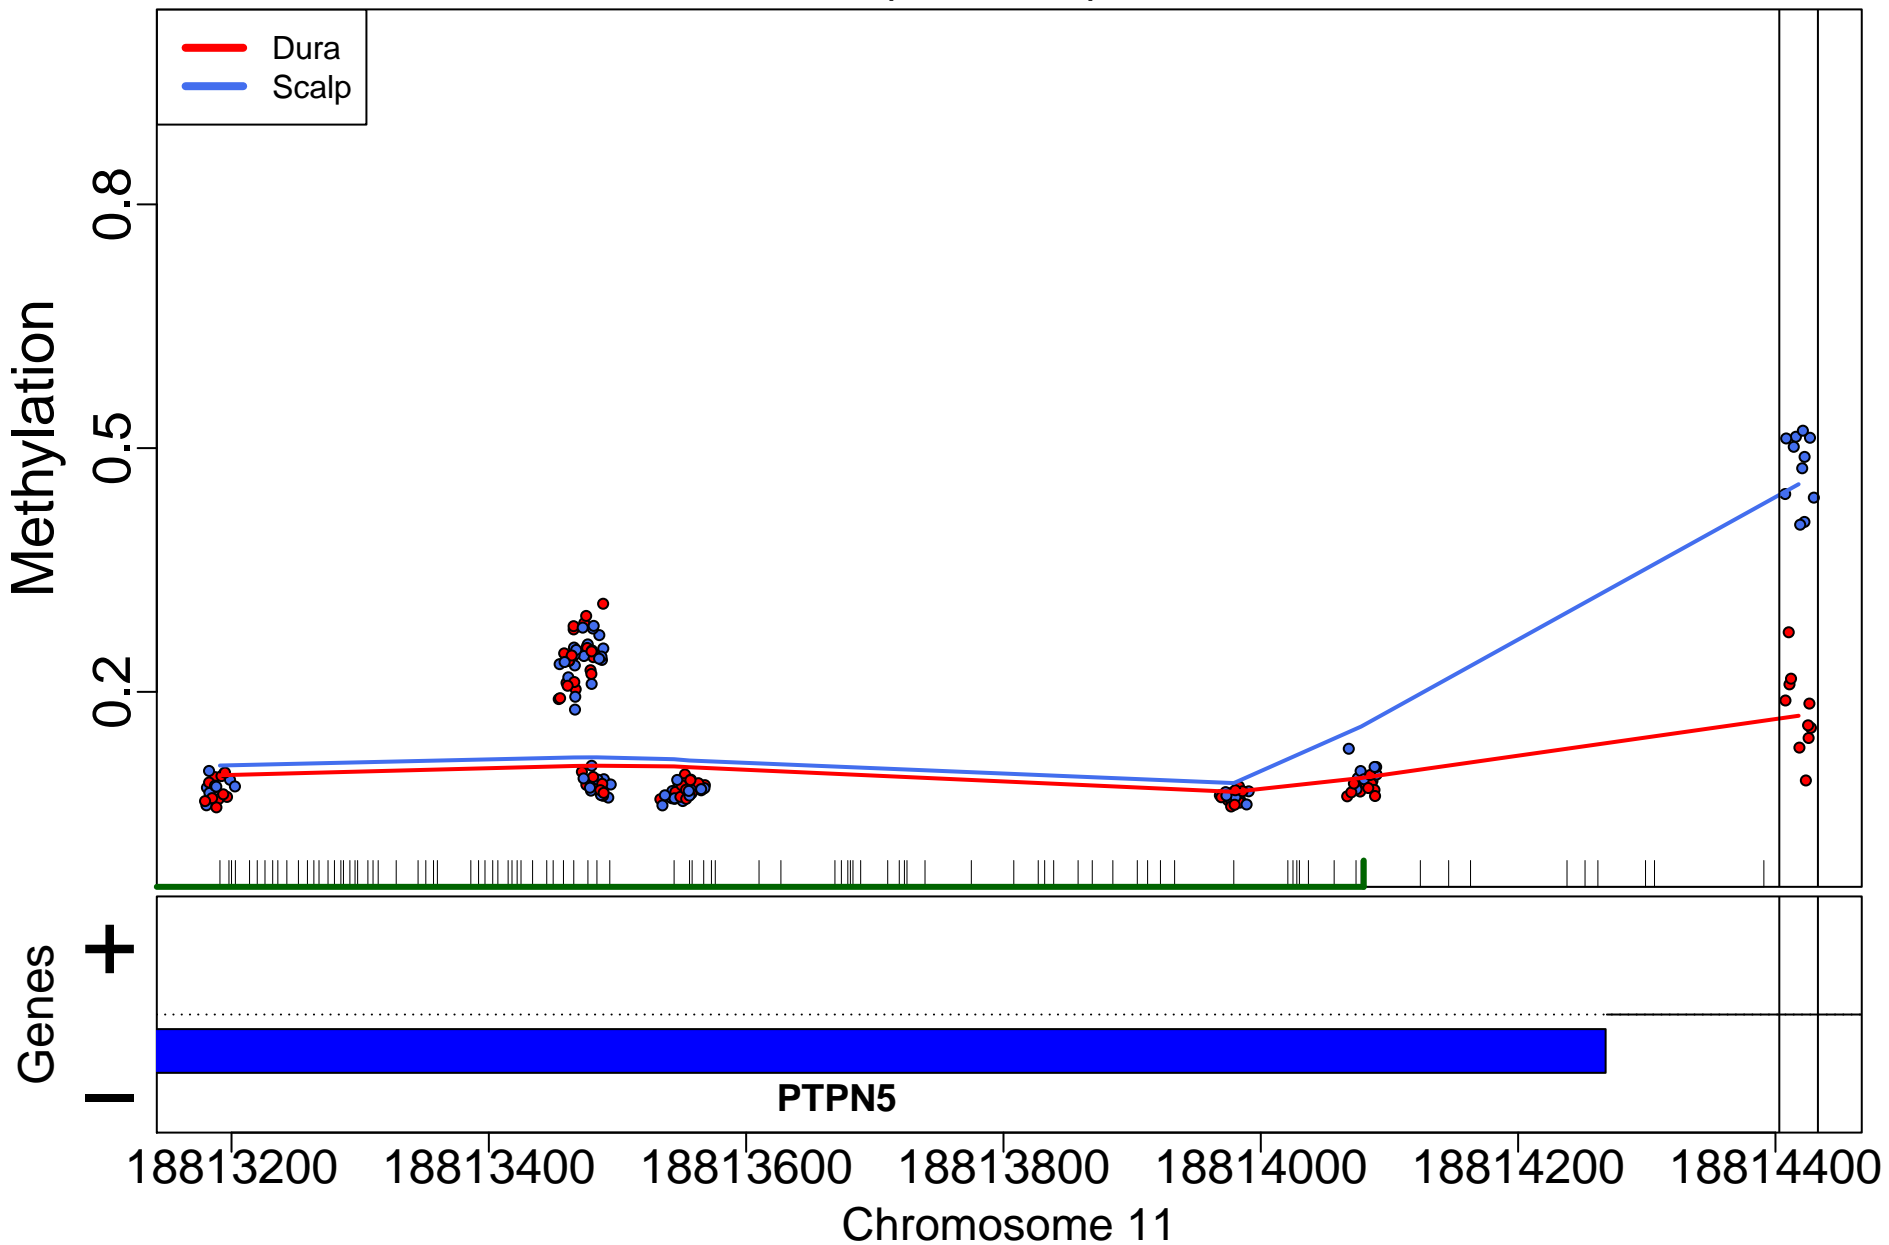



MFSD2A; 485bp from tss:promoter

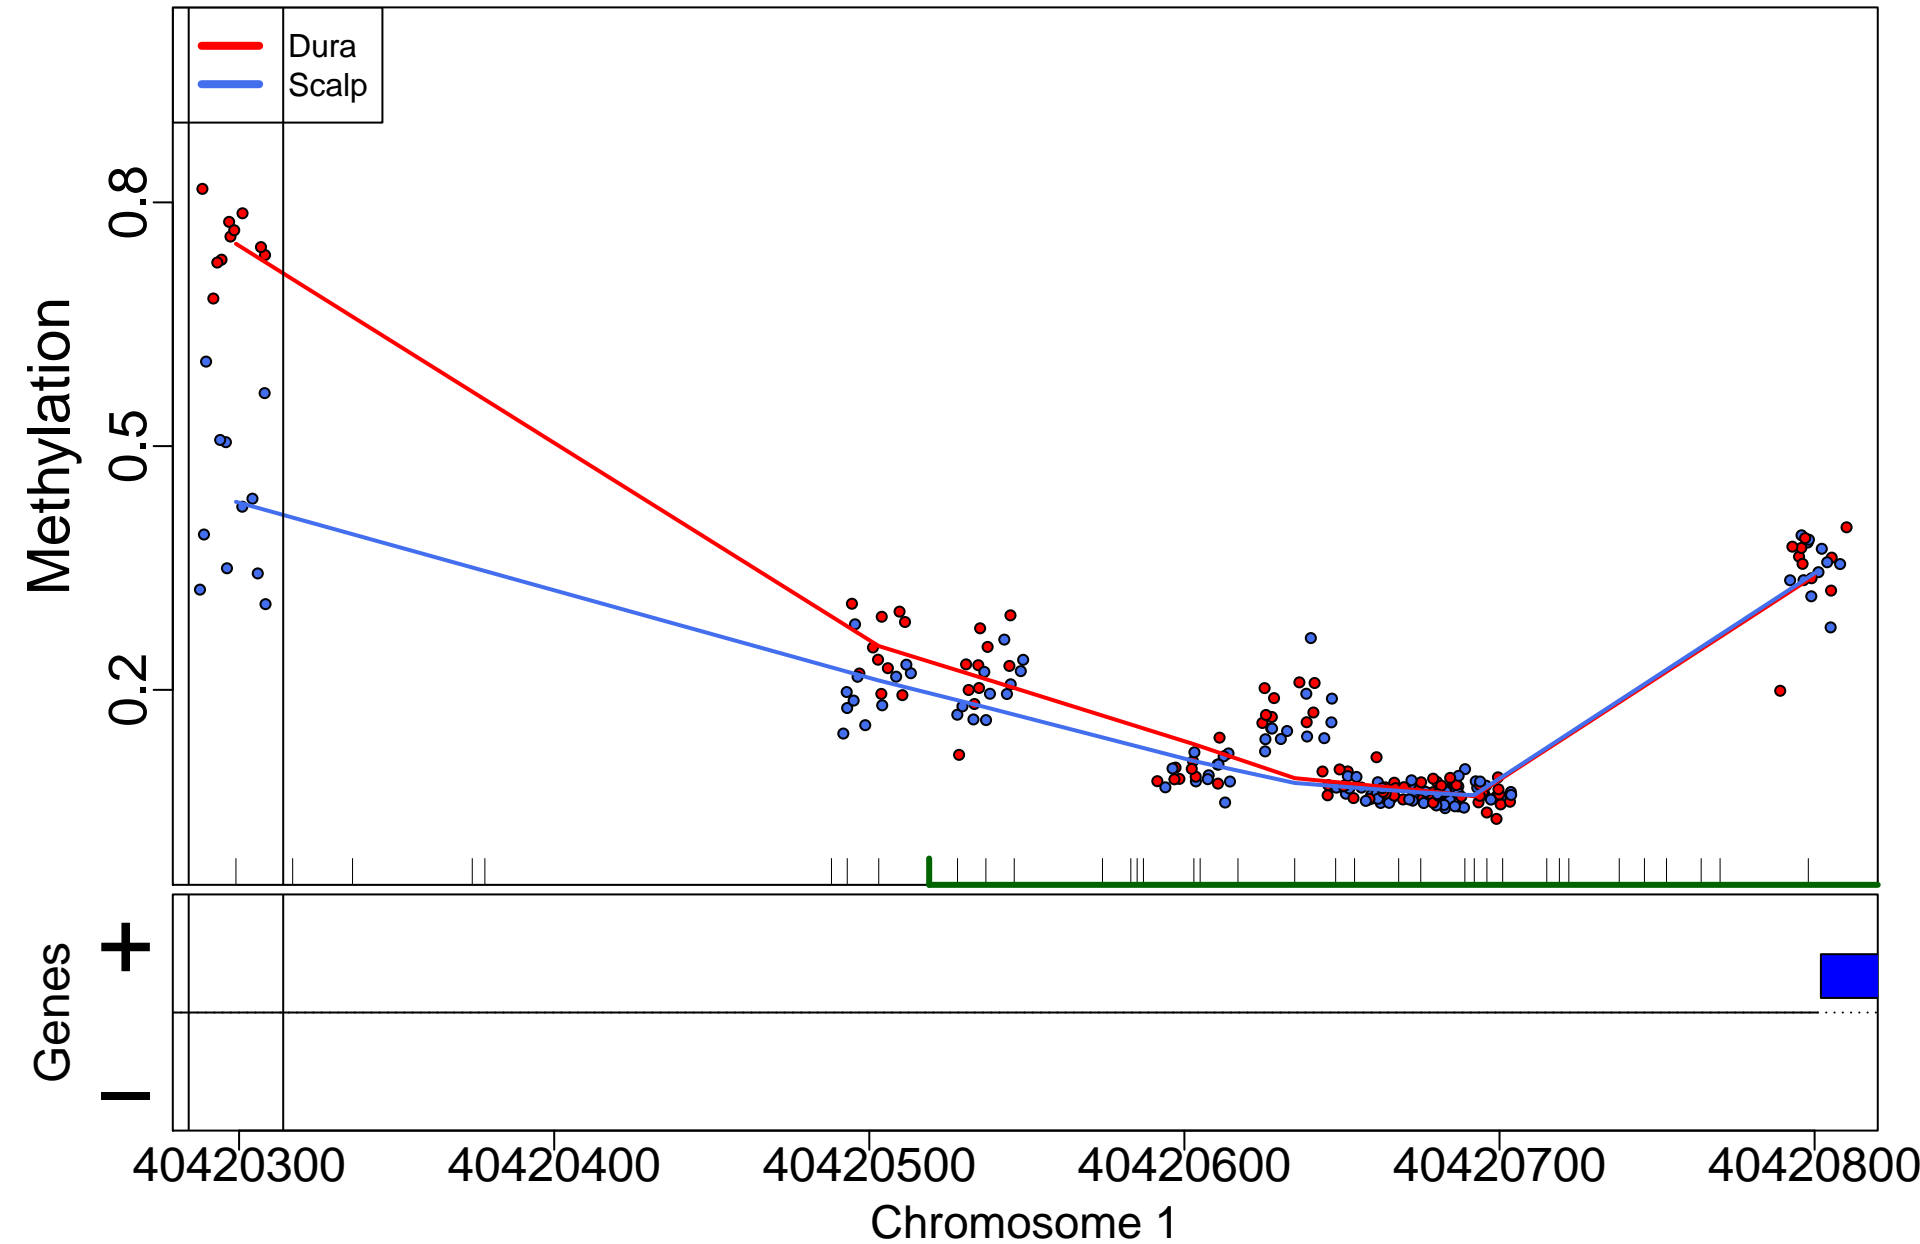

ZFH3; 11410bp from tss:inside intron

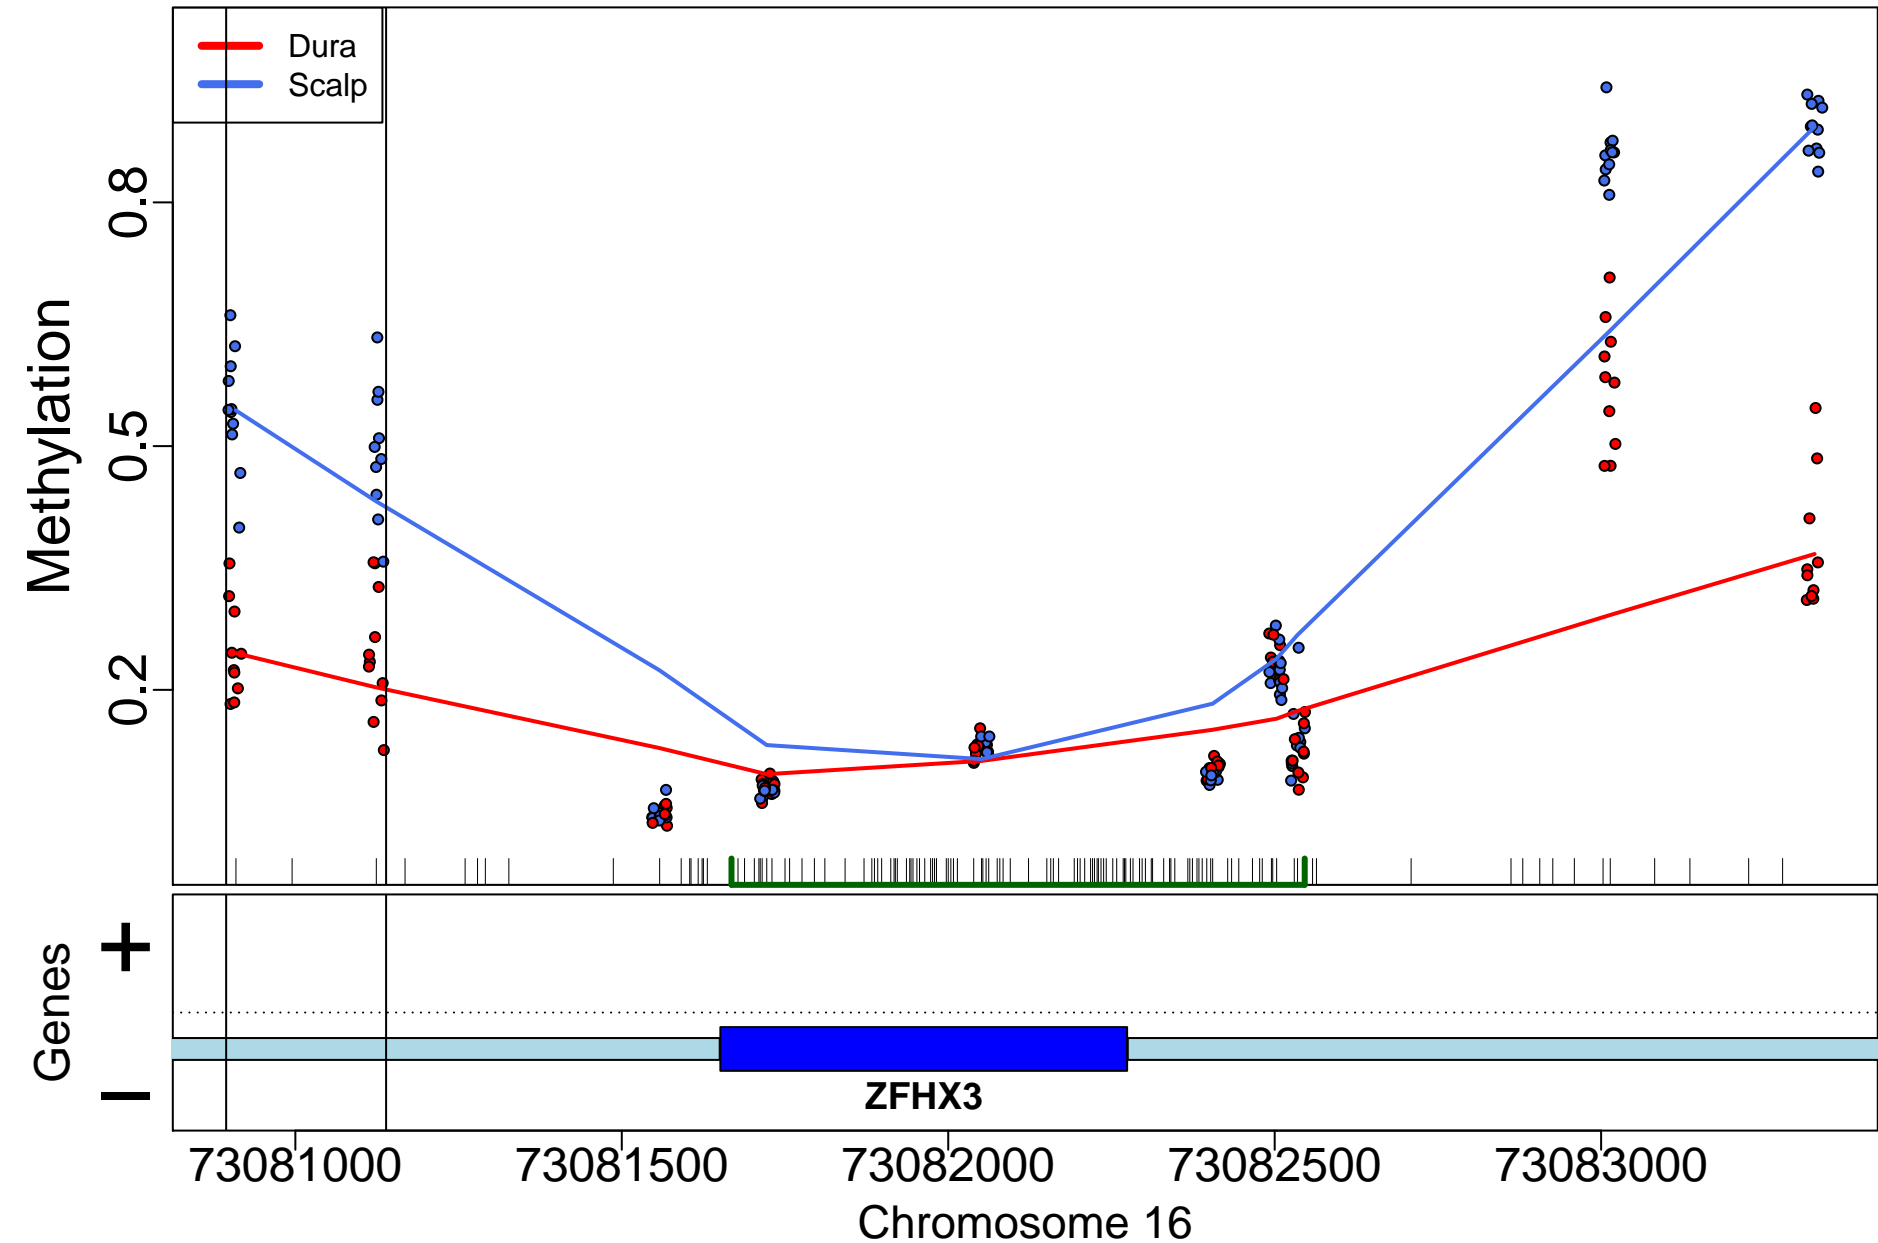

SERP2; 1229bp from tss:inside intron

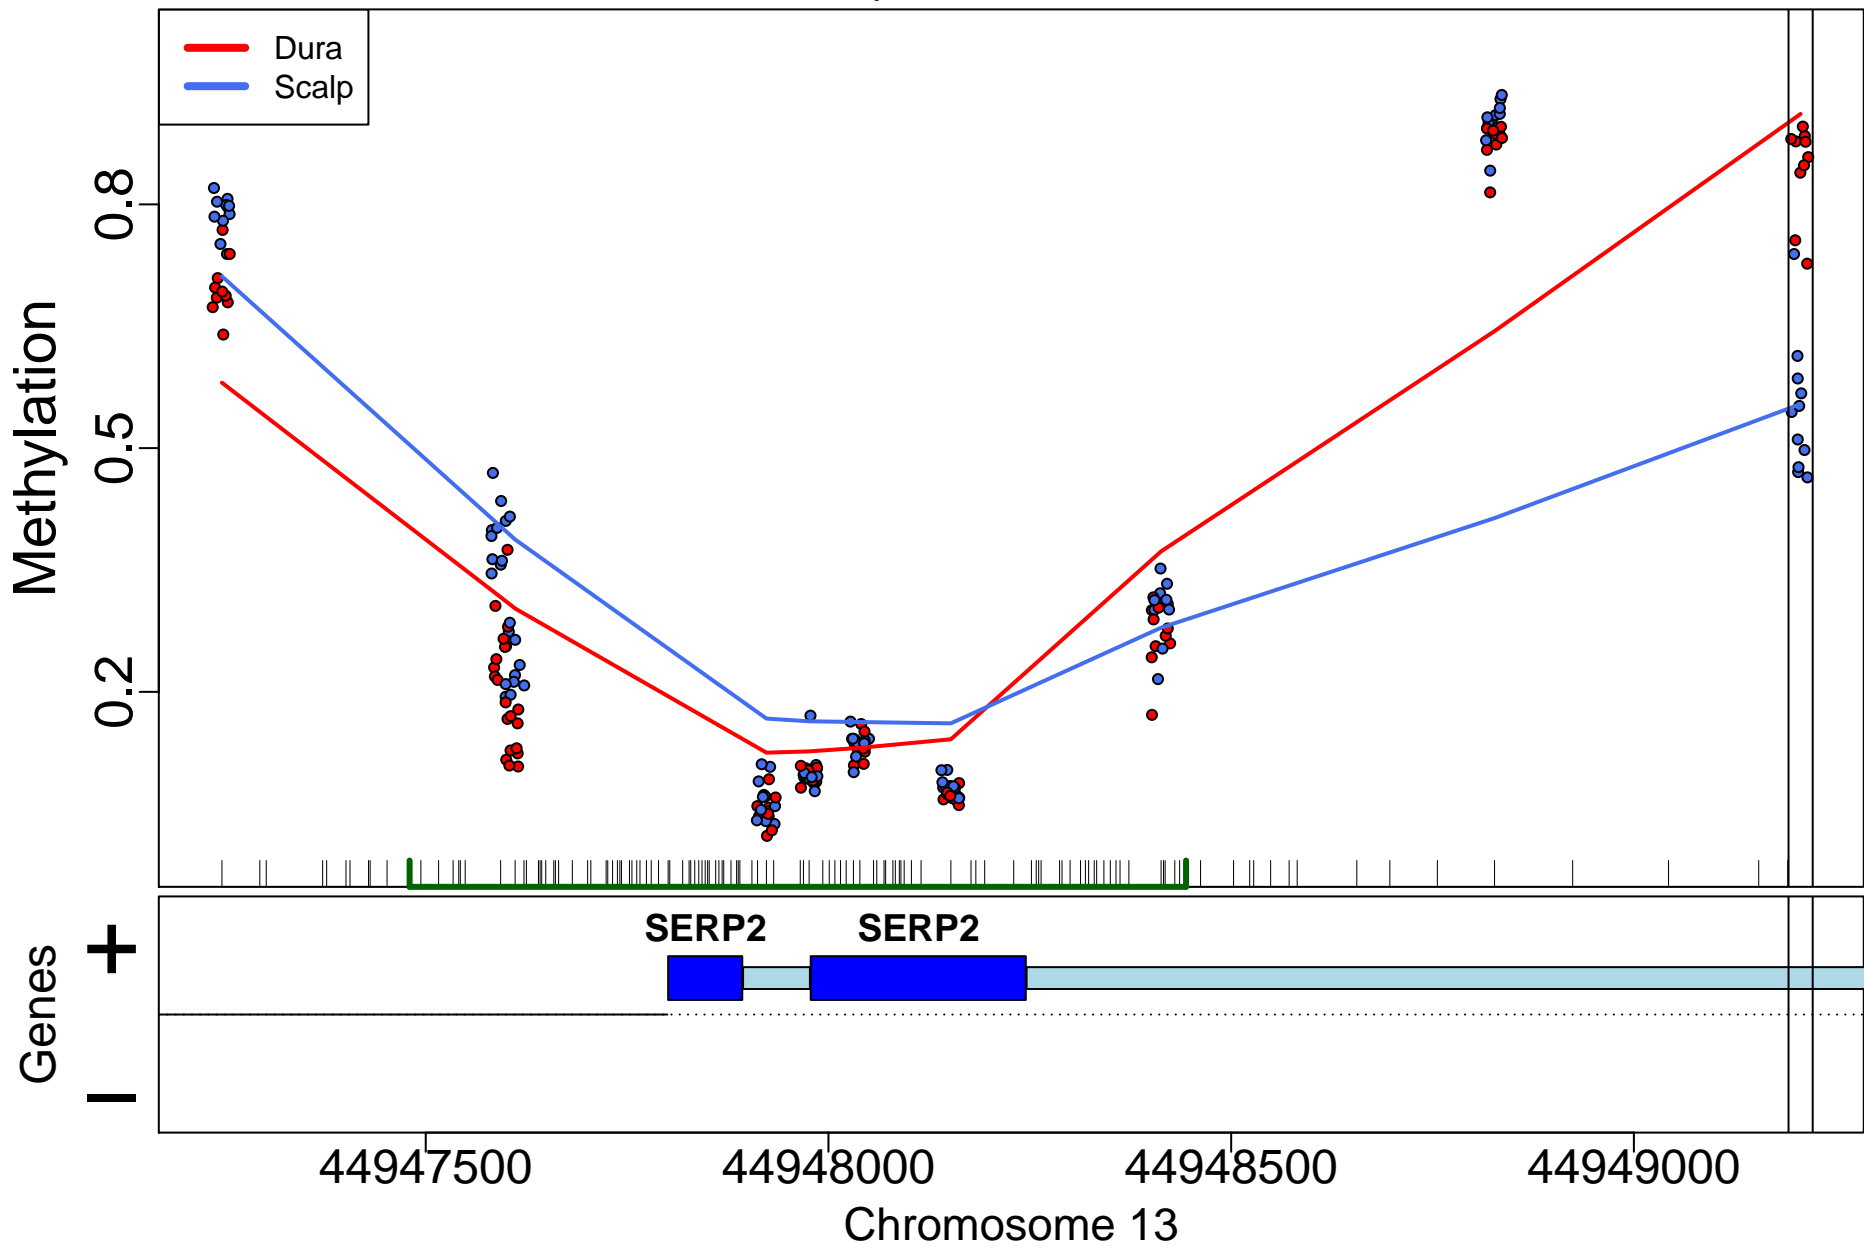

# SIAH3; 28bp from tss:promoter

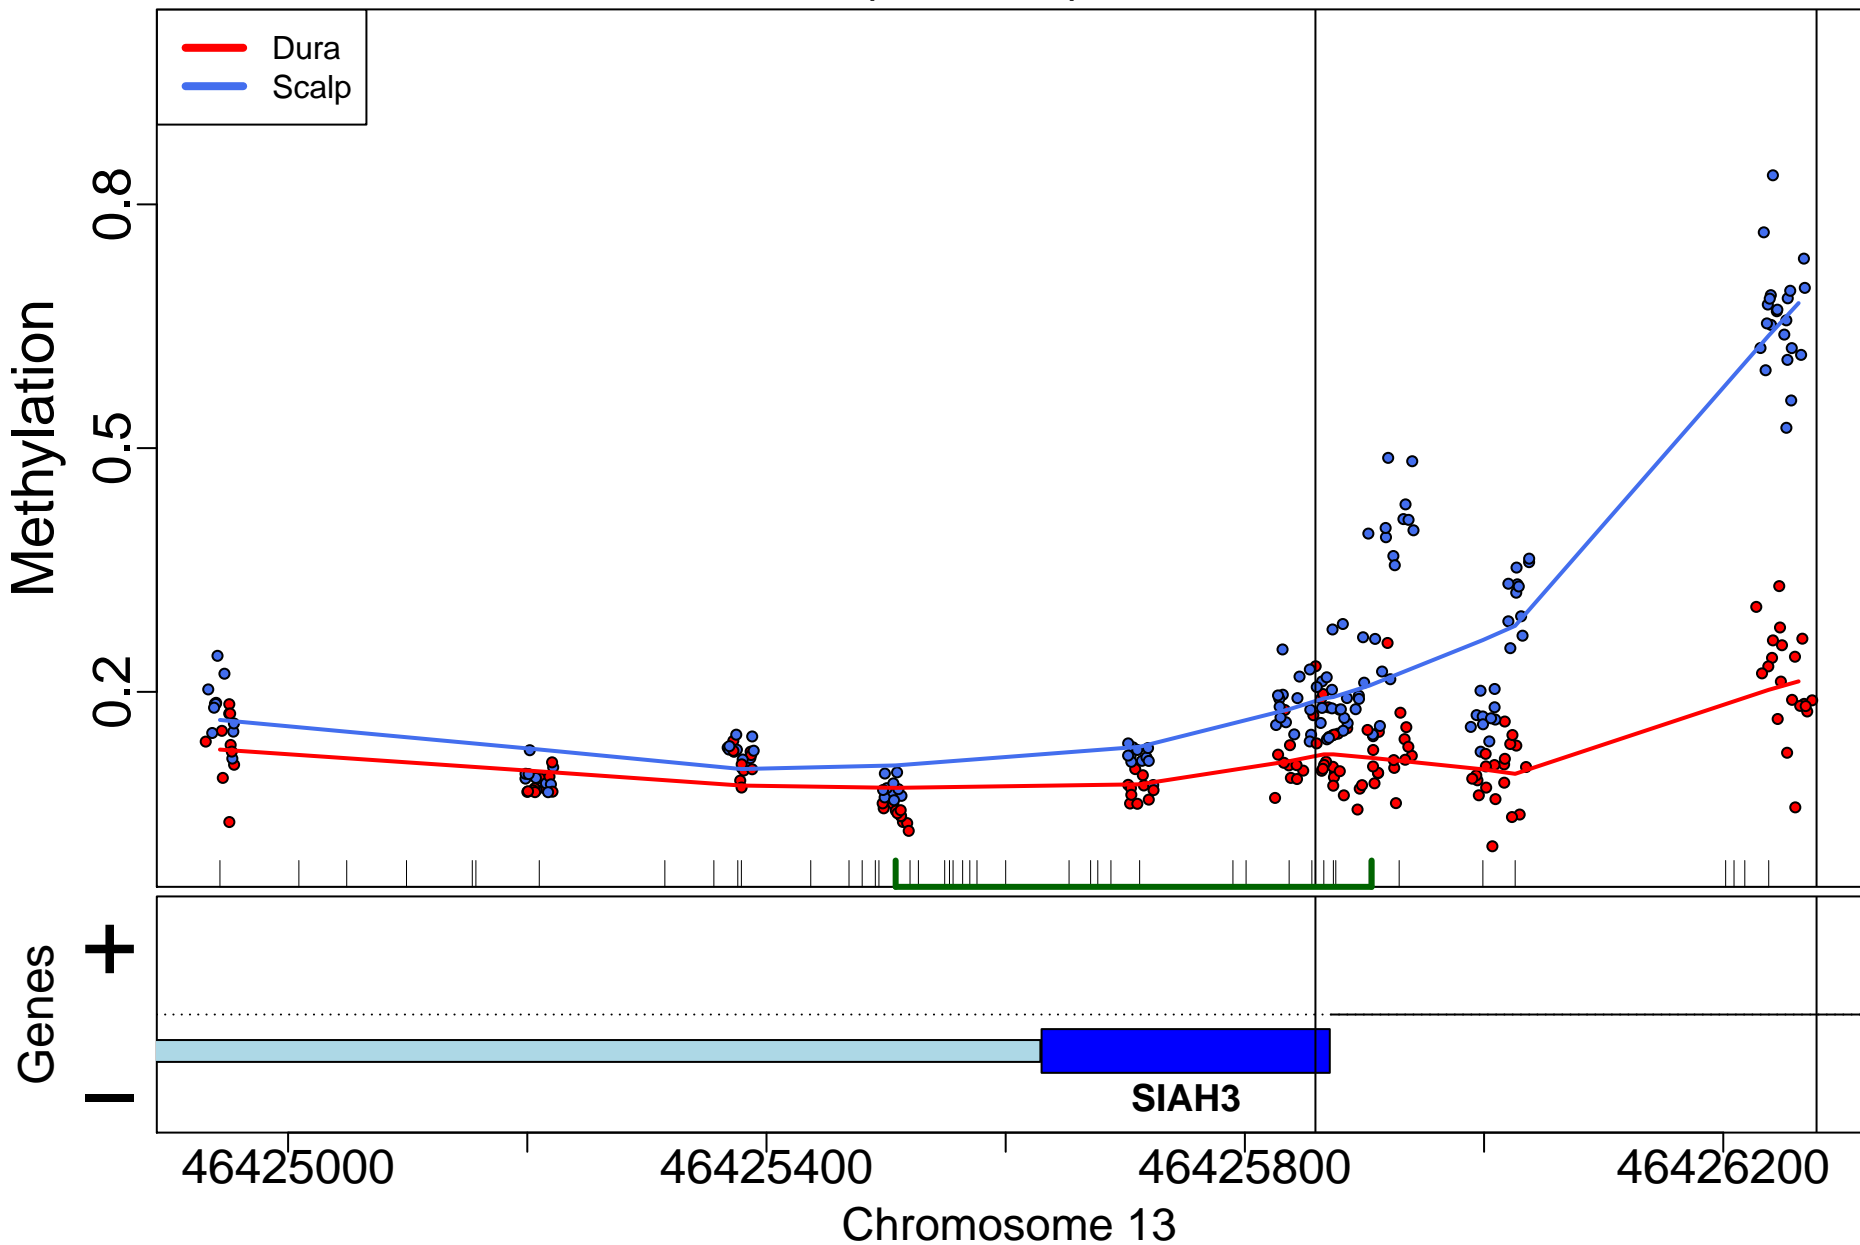

RBFOX3; 17396bp from tss:inside intron

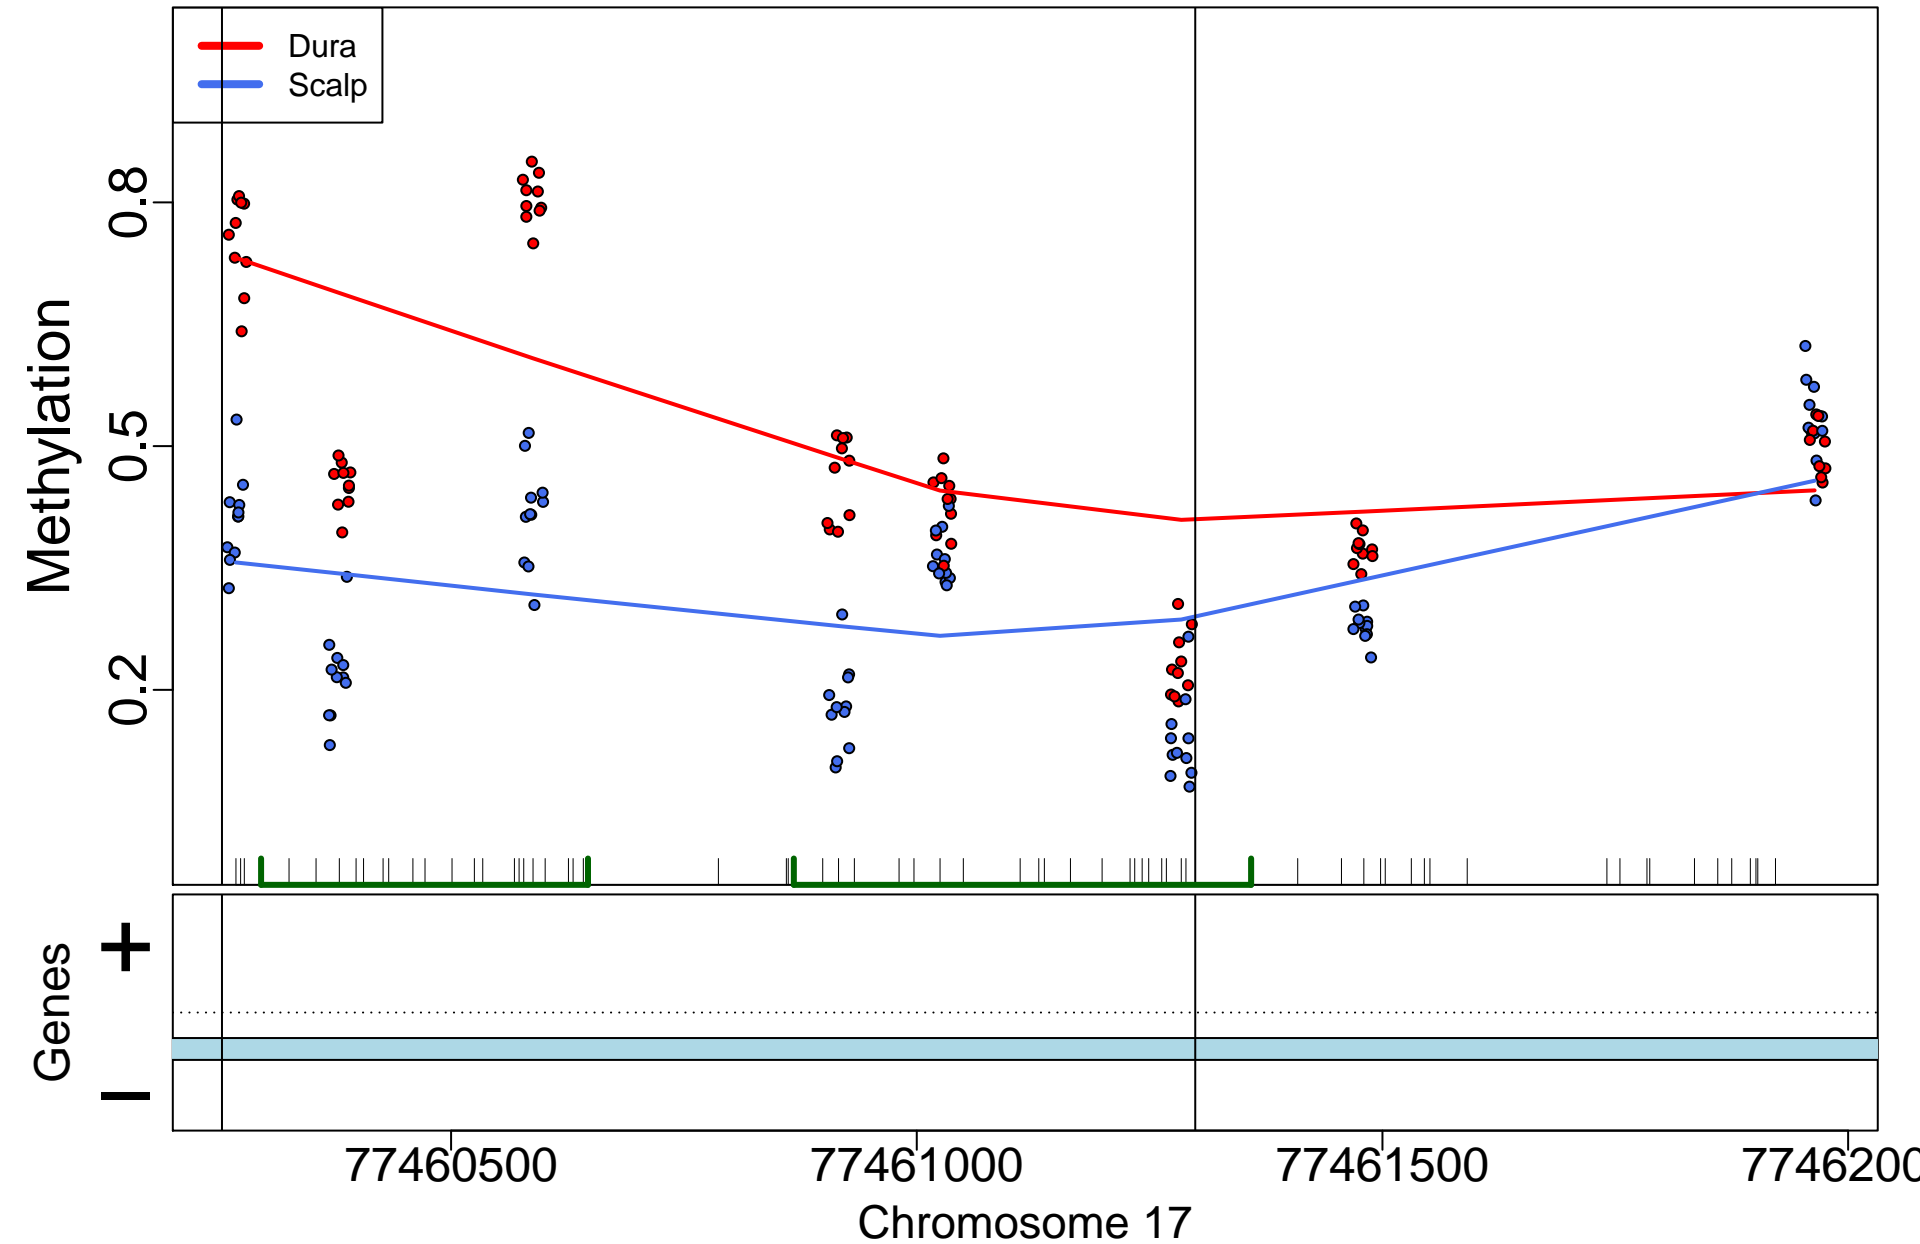

# NHLH1; 149bp from tss:promoter

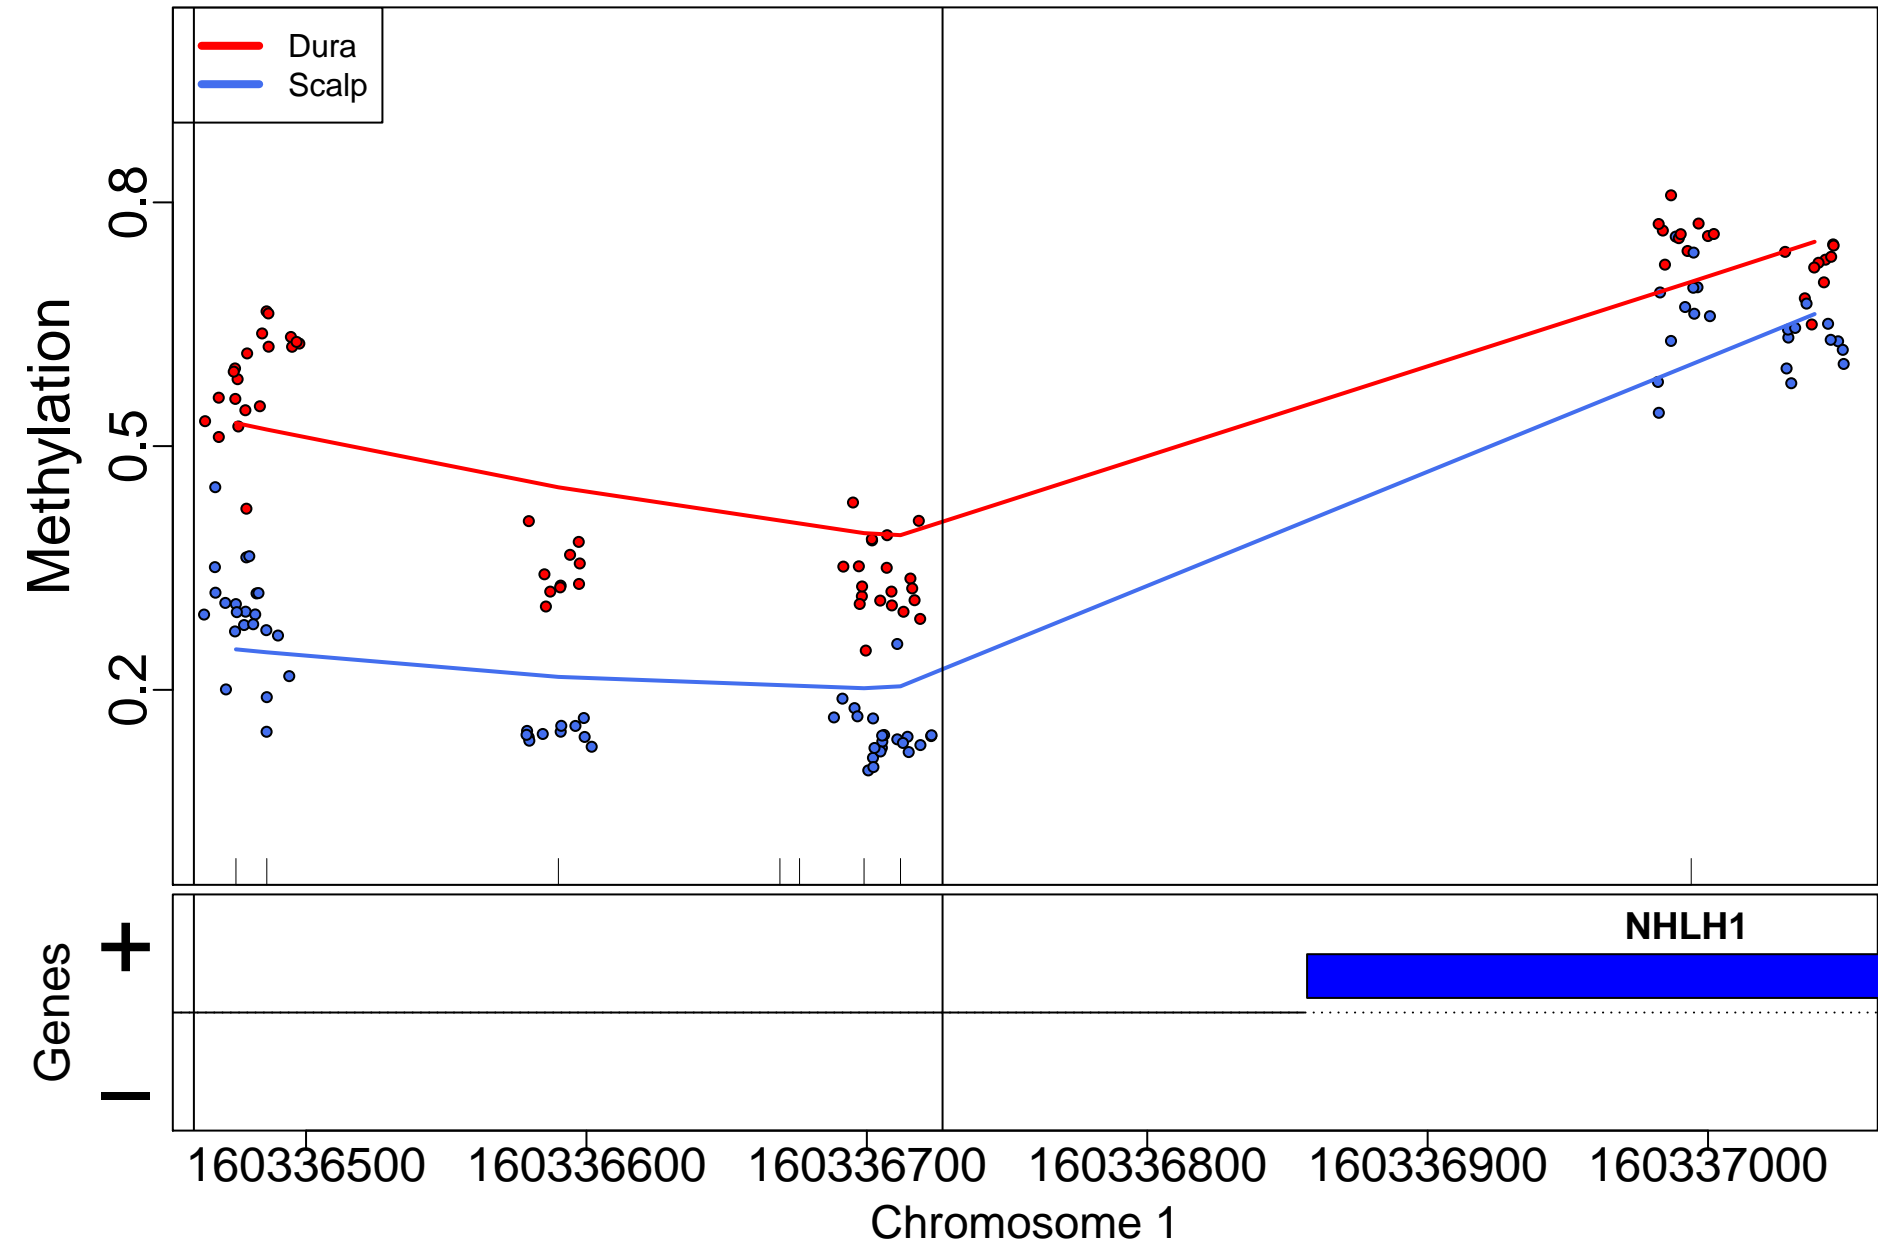

PRKG1-AS1; 0bp from tss:NA

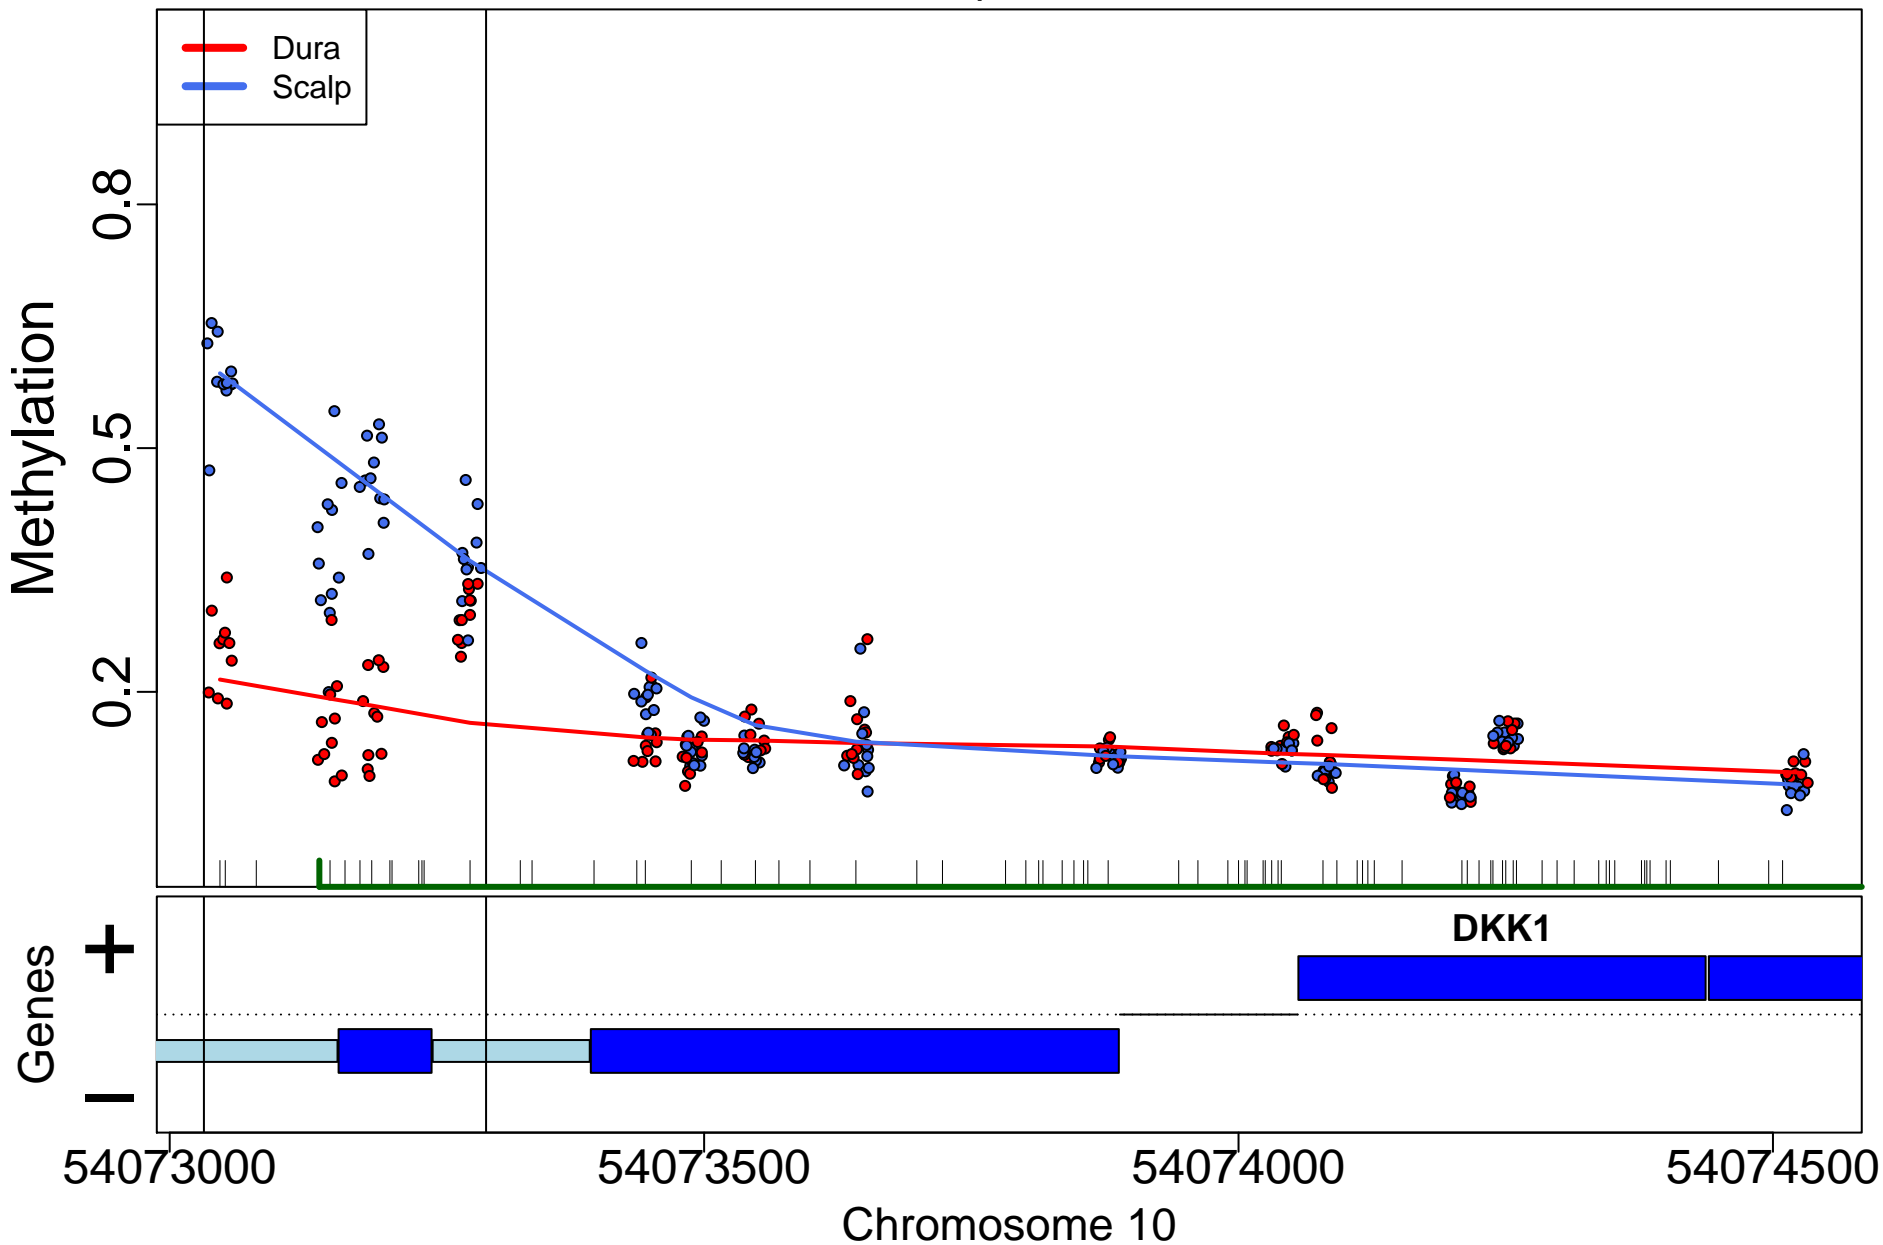

CYP26B1; 3439bp from tss:inside intron

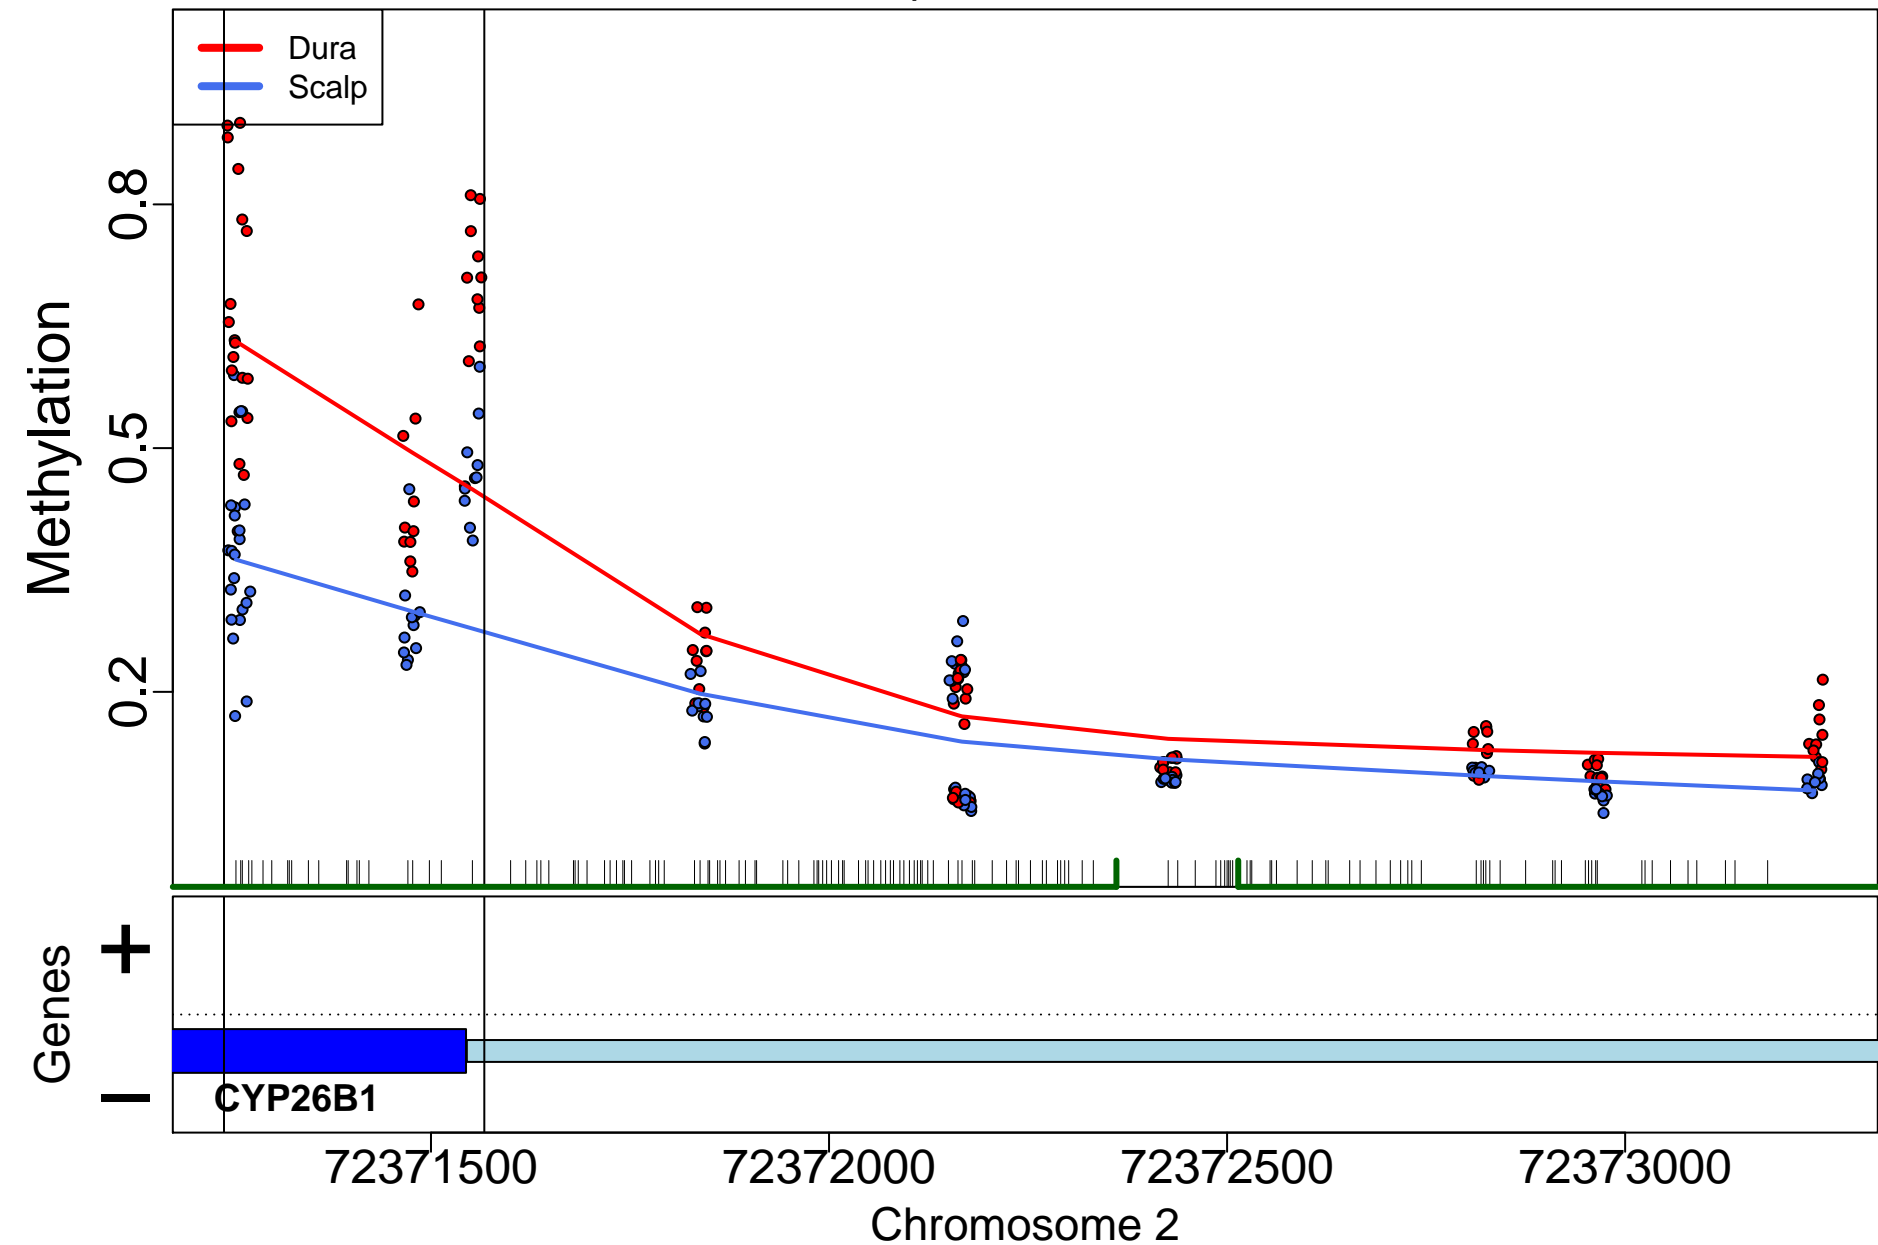



# SHISA3; 763bp from tss:promoter

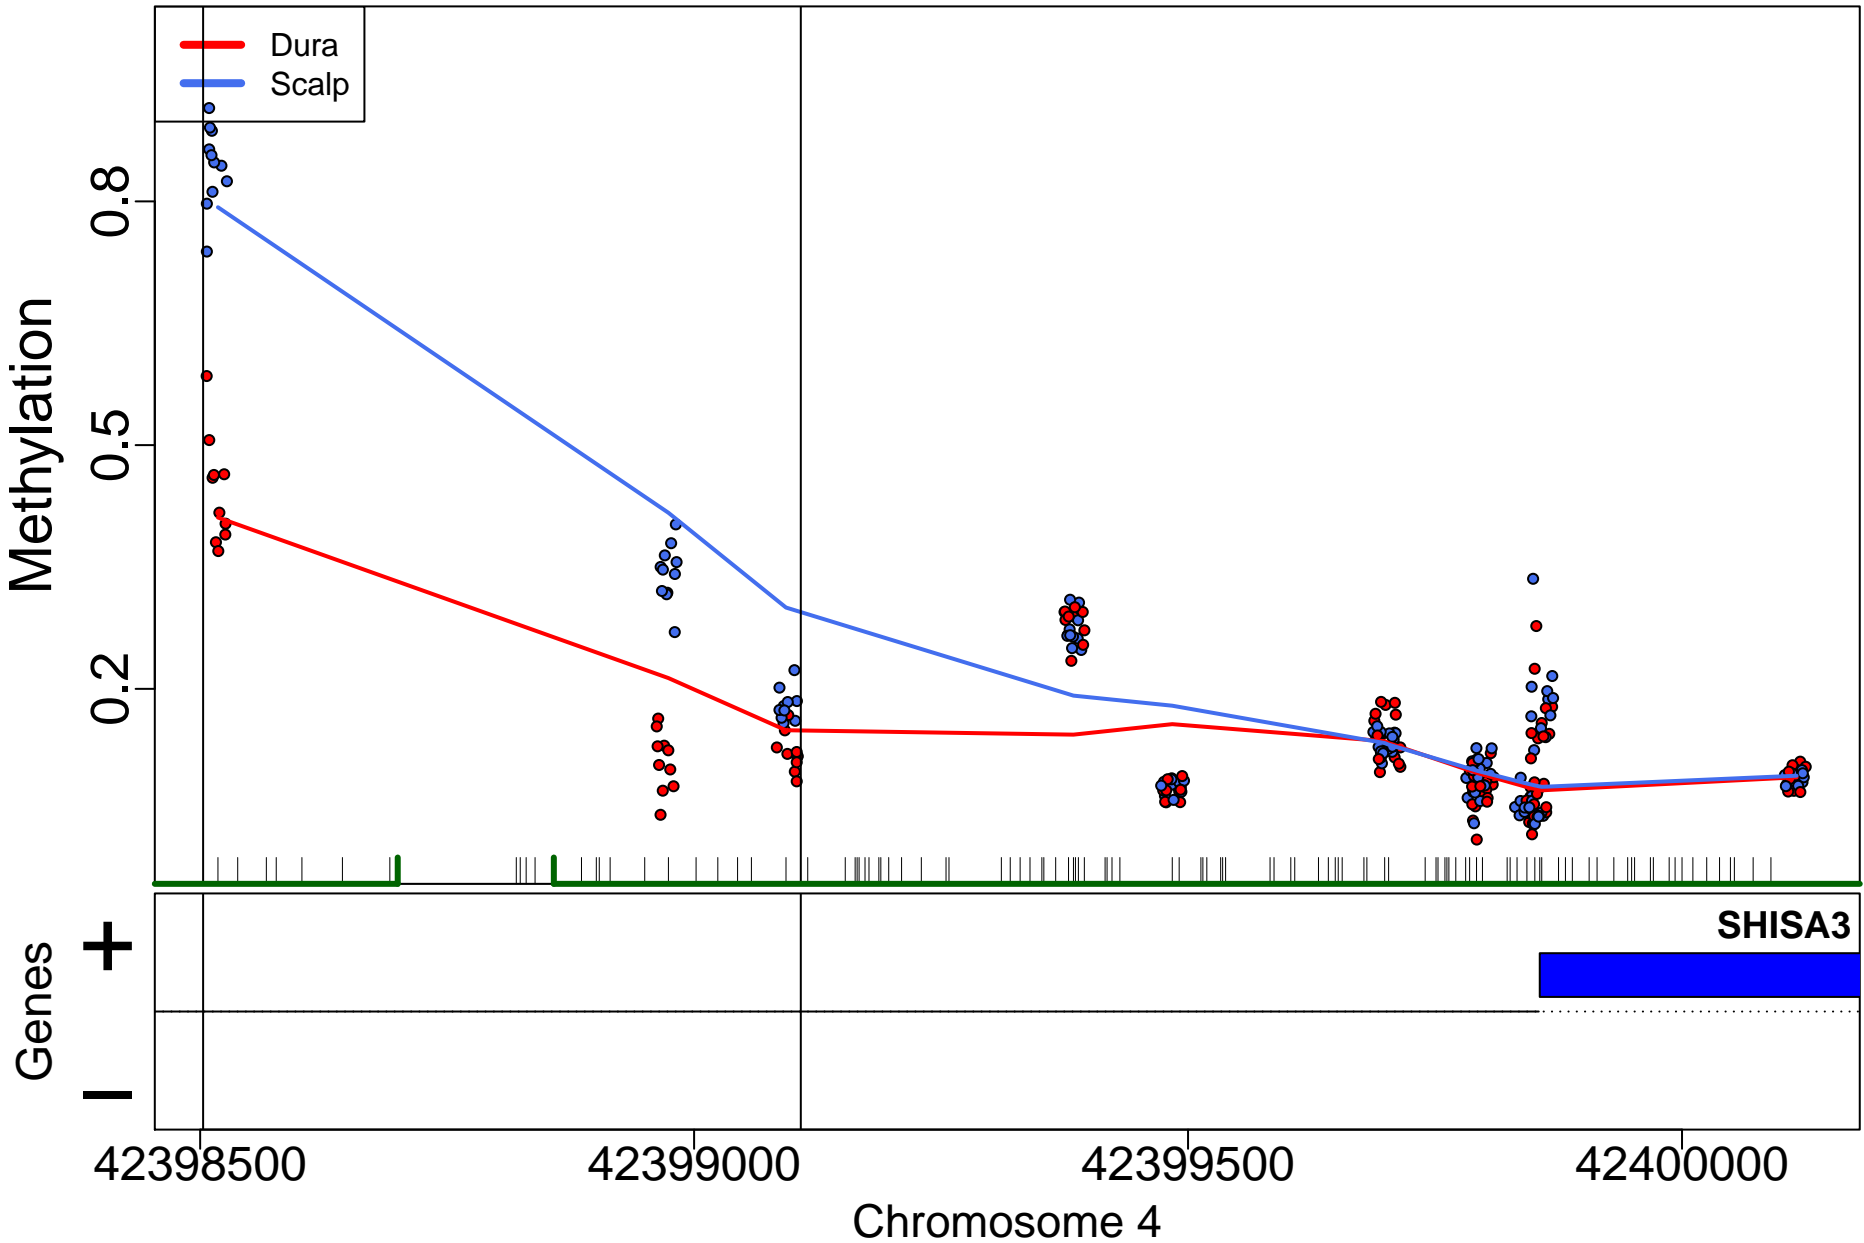

# IFNGR2; 320bp from tss:promoter

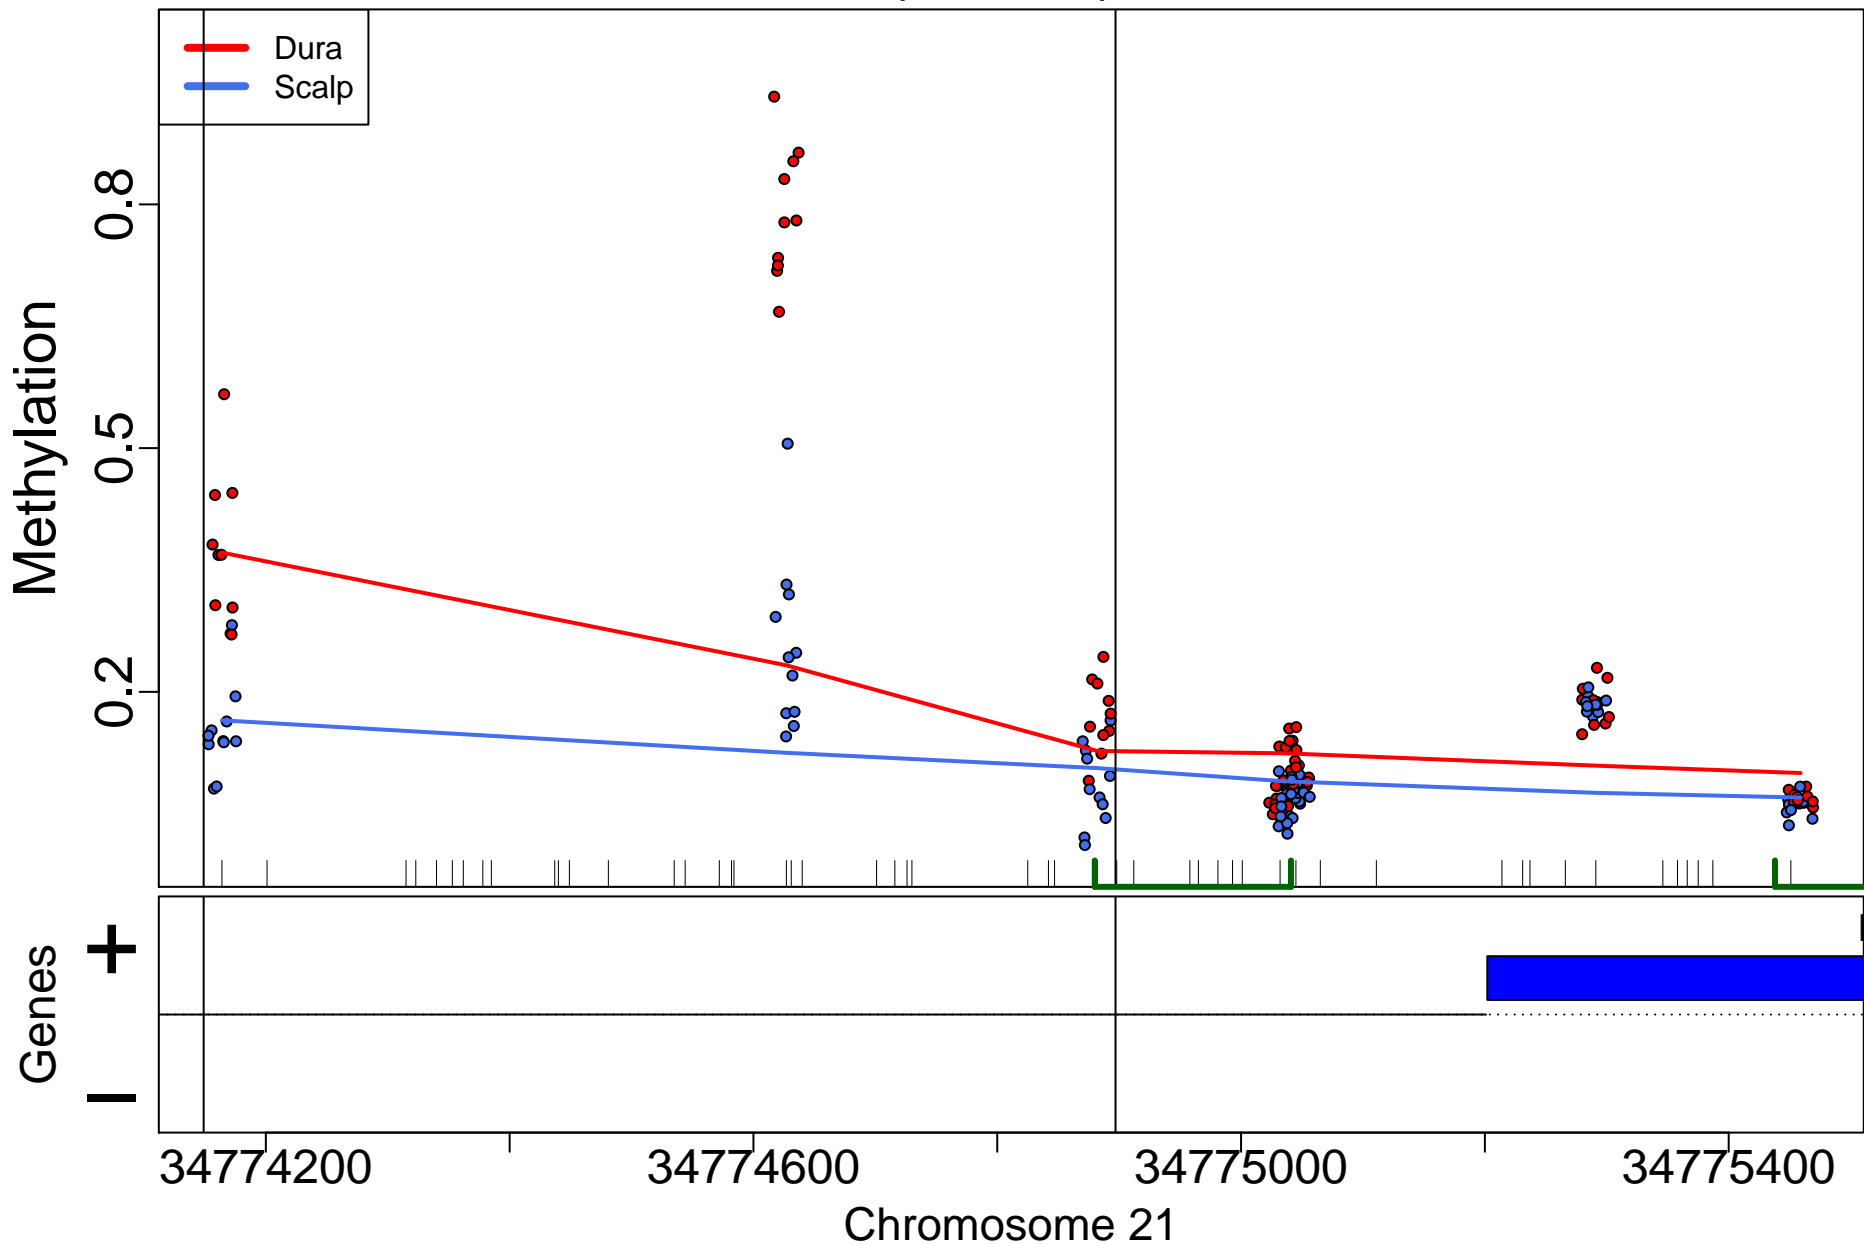

FOXD2; 71877bp from tss:downstream

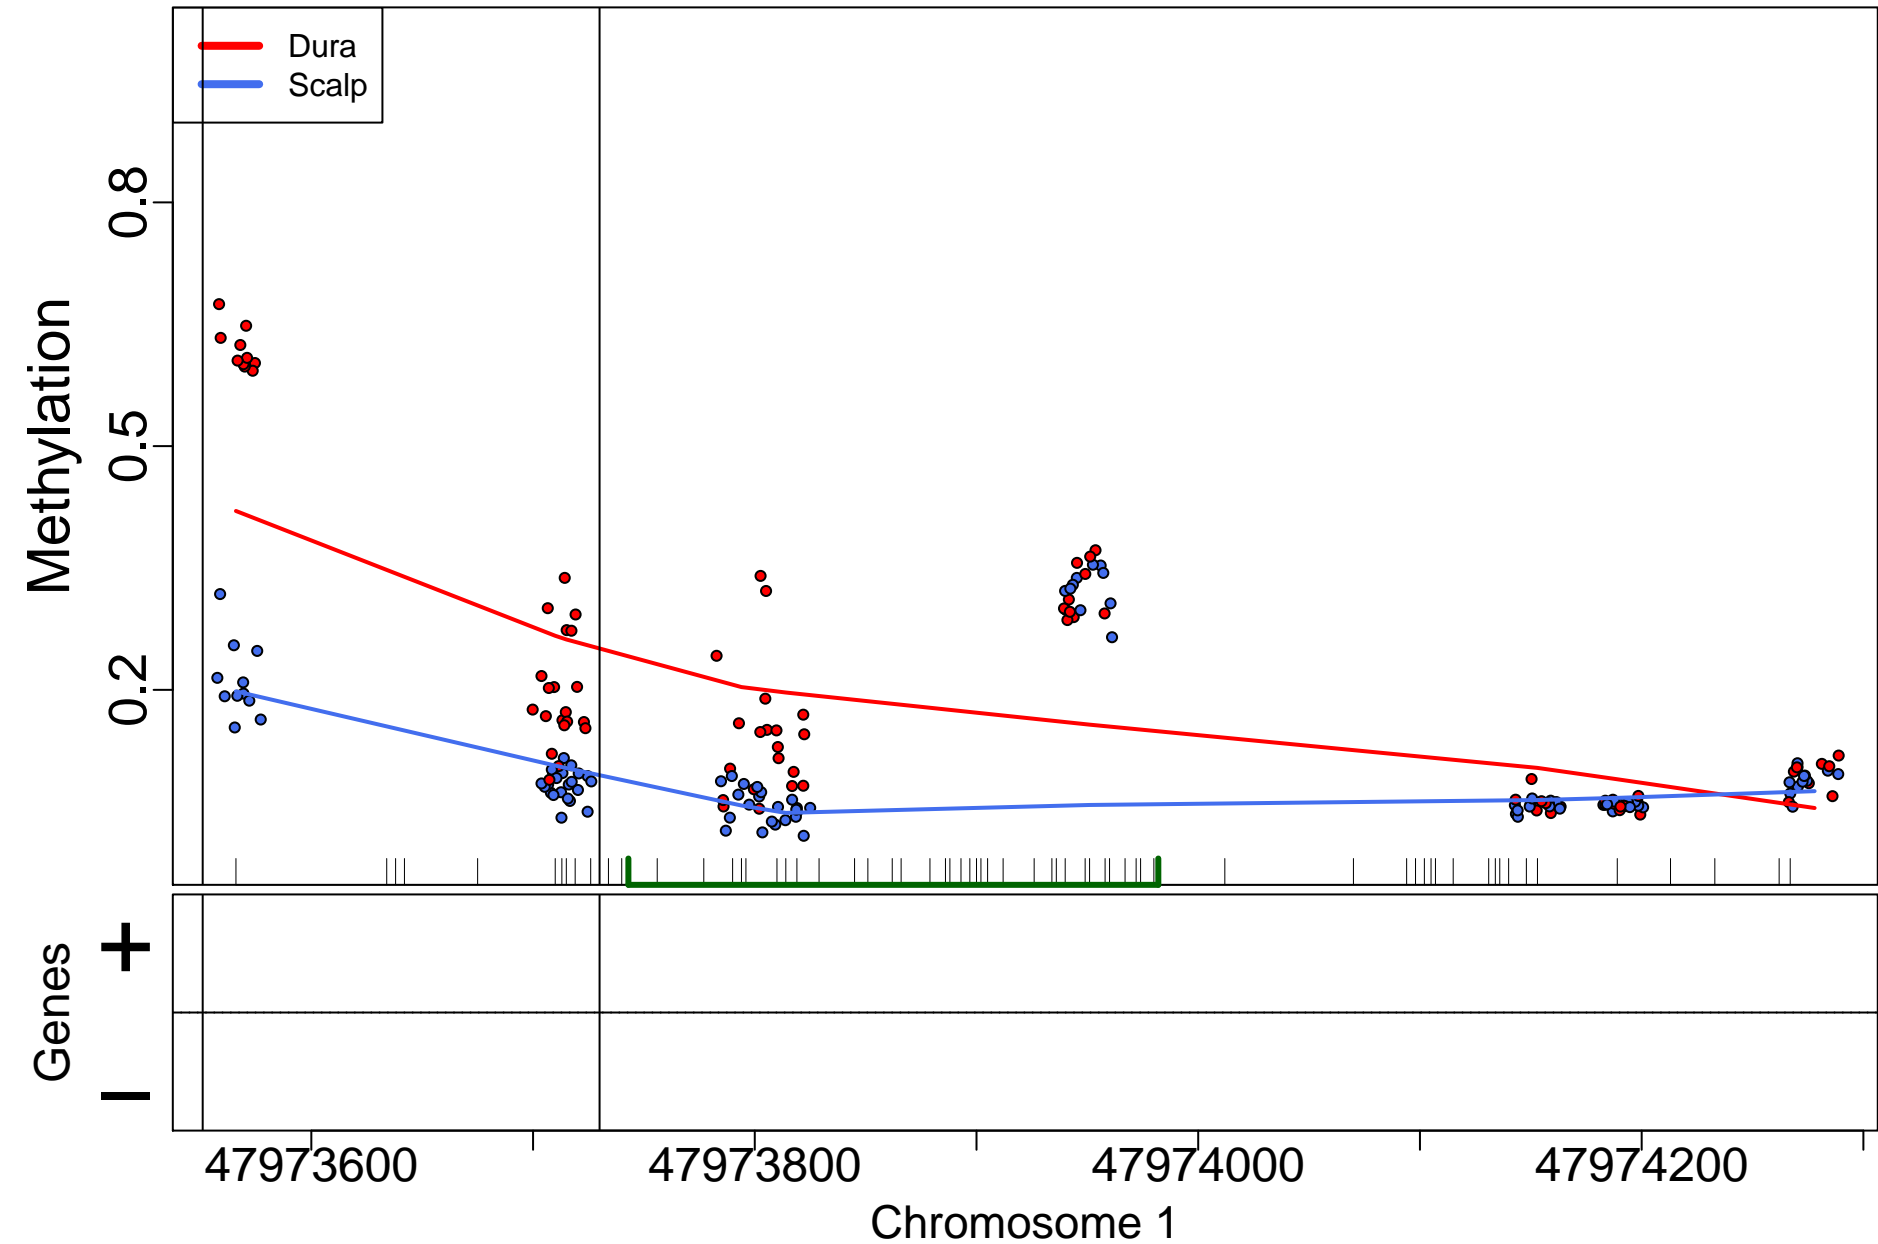

TTC40; 62992bp from tss:inside exon

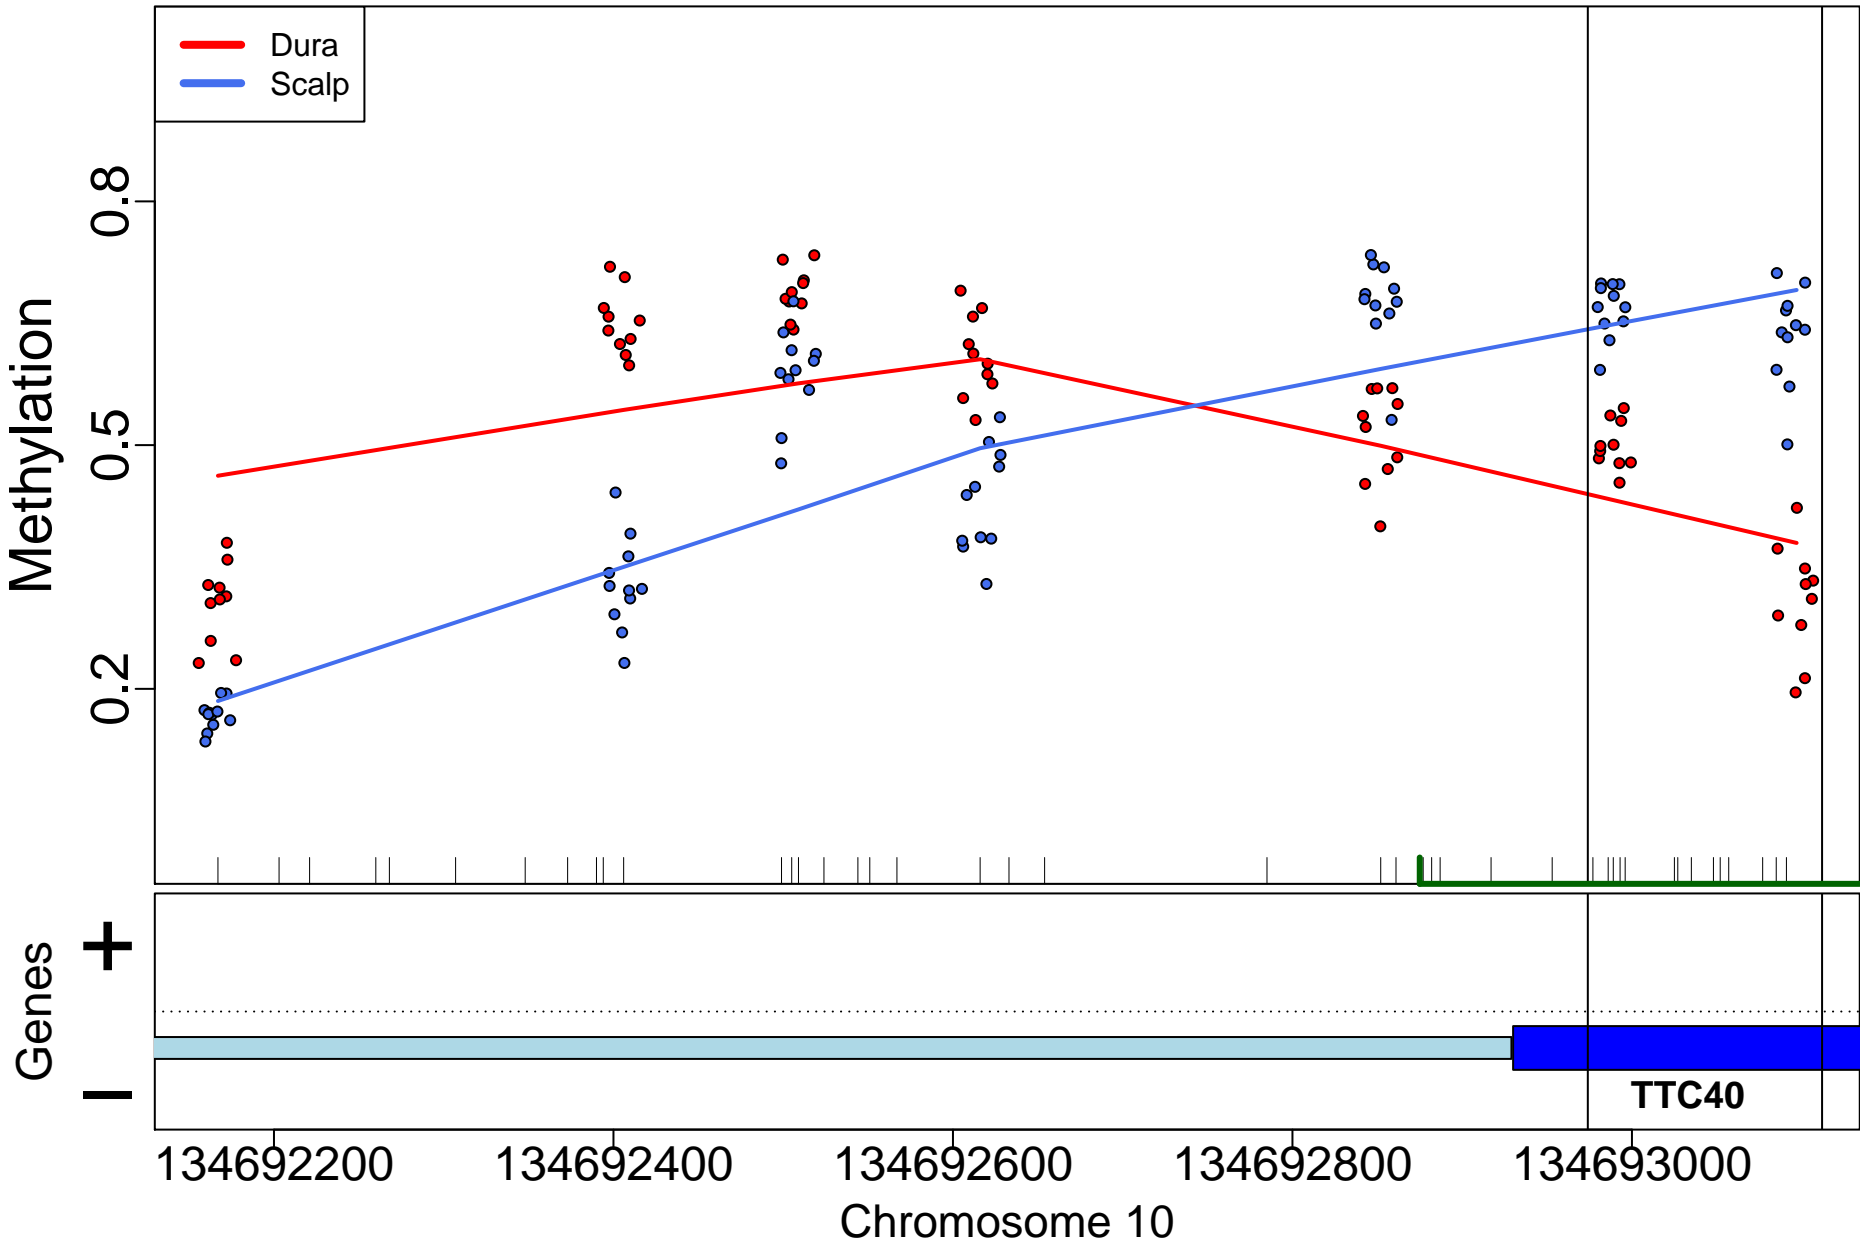

# GABBR1; 20670bp from tss:inside intron

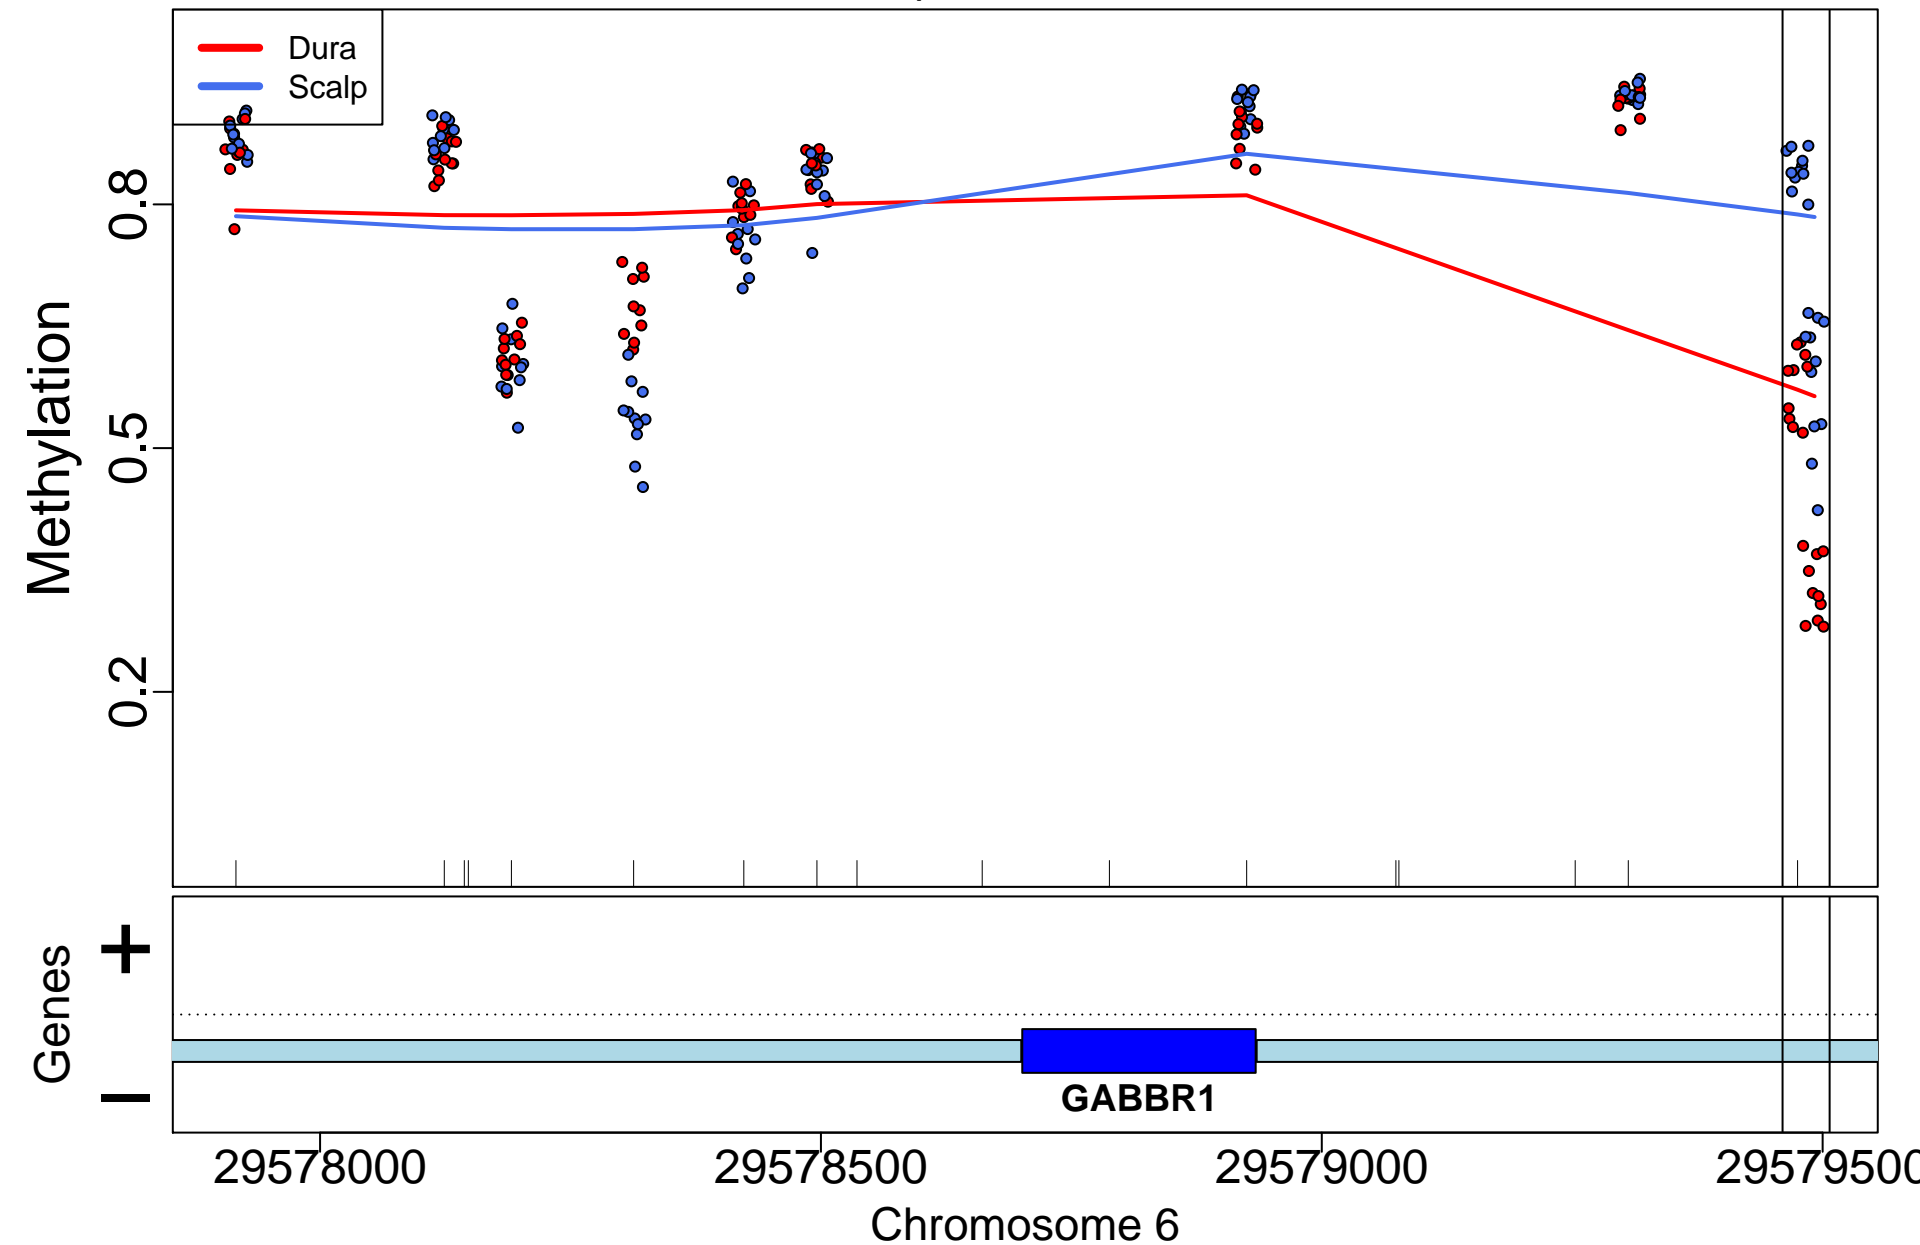

CSNK1D; 2042bp from tss:inside intron

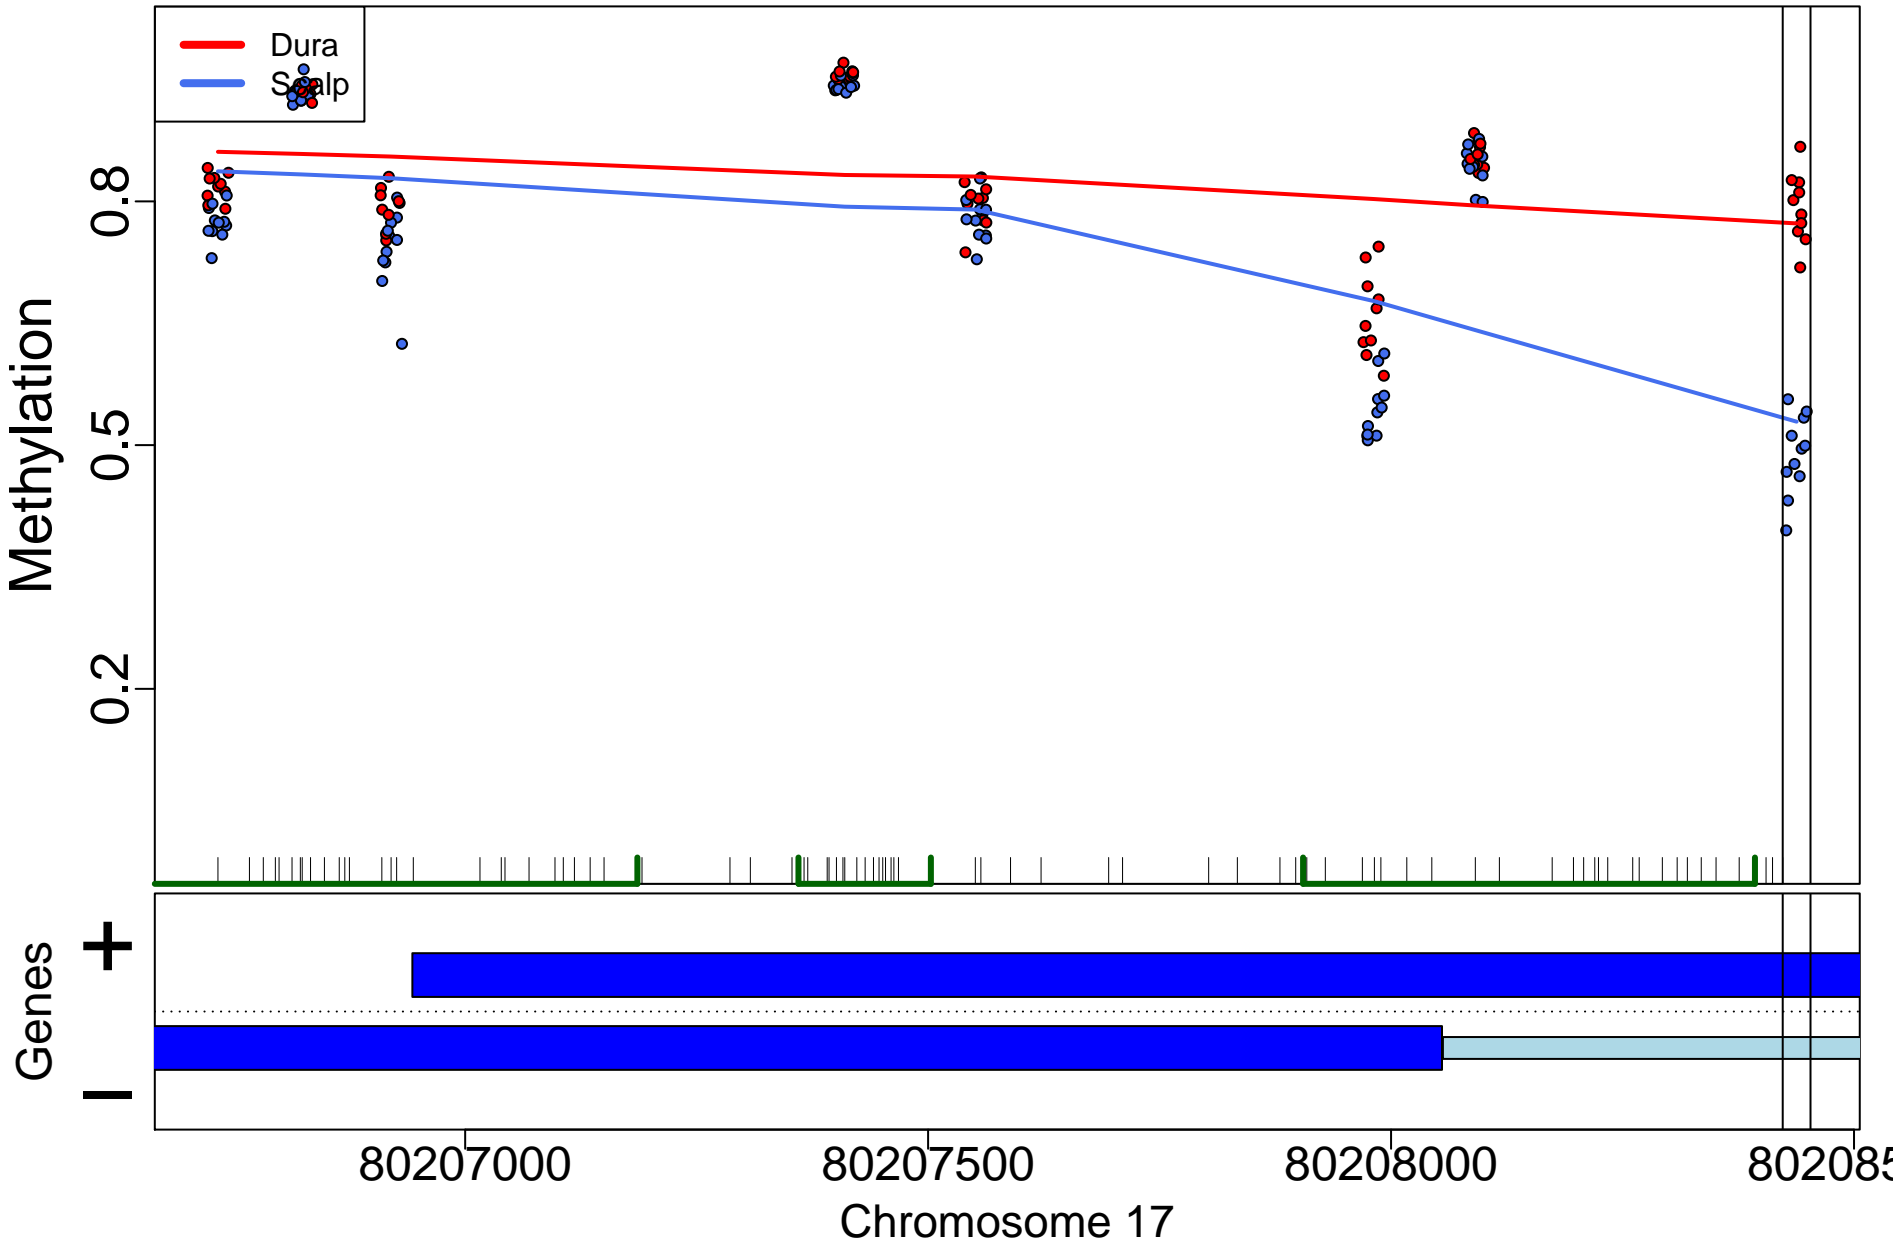

ESRP2; 0bp from tss:overlaps 5'

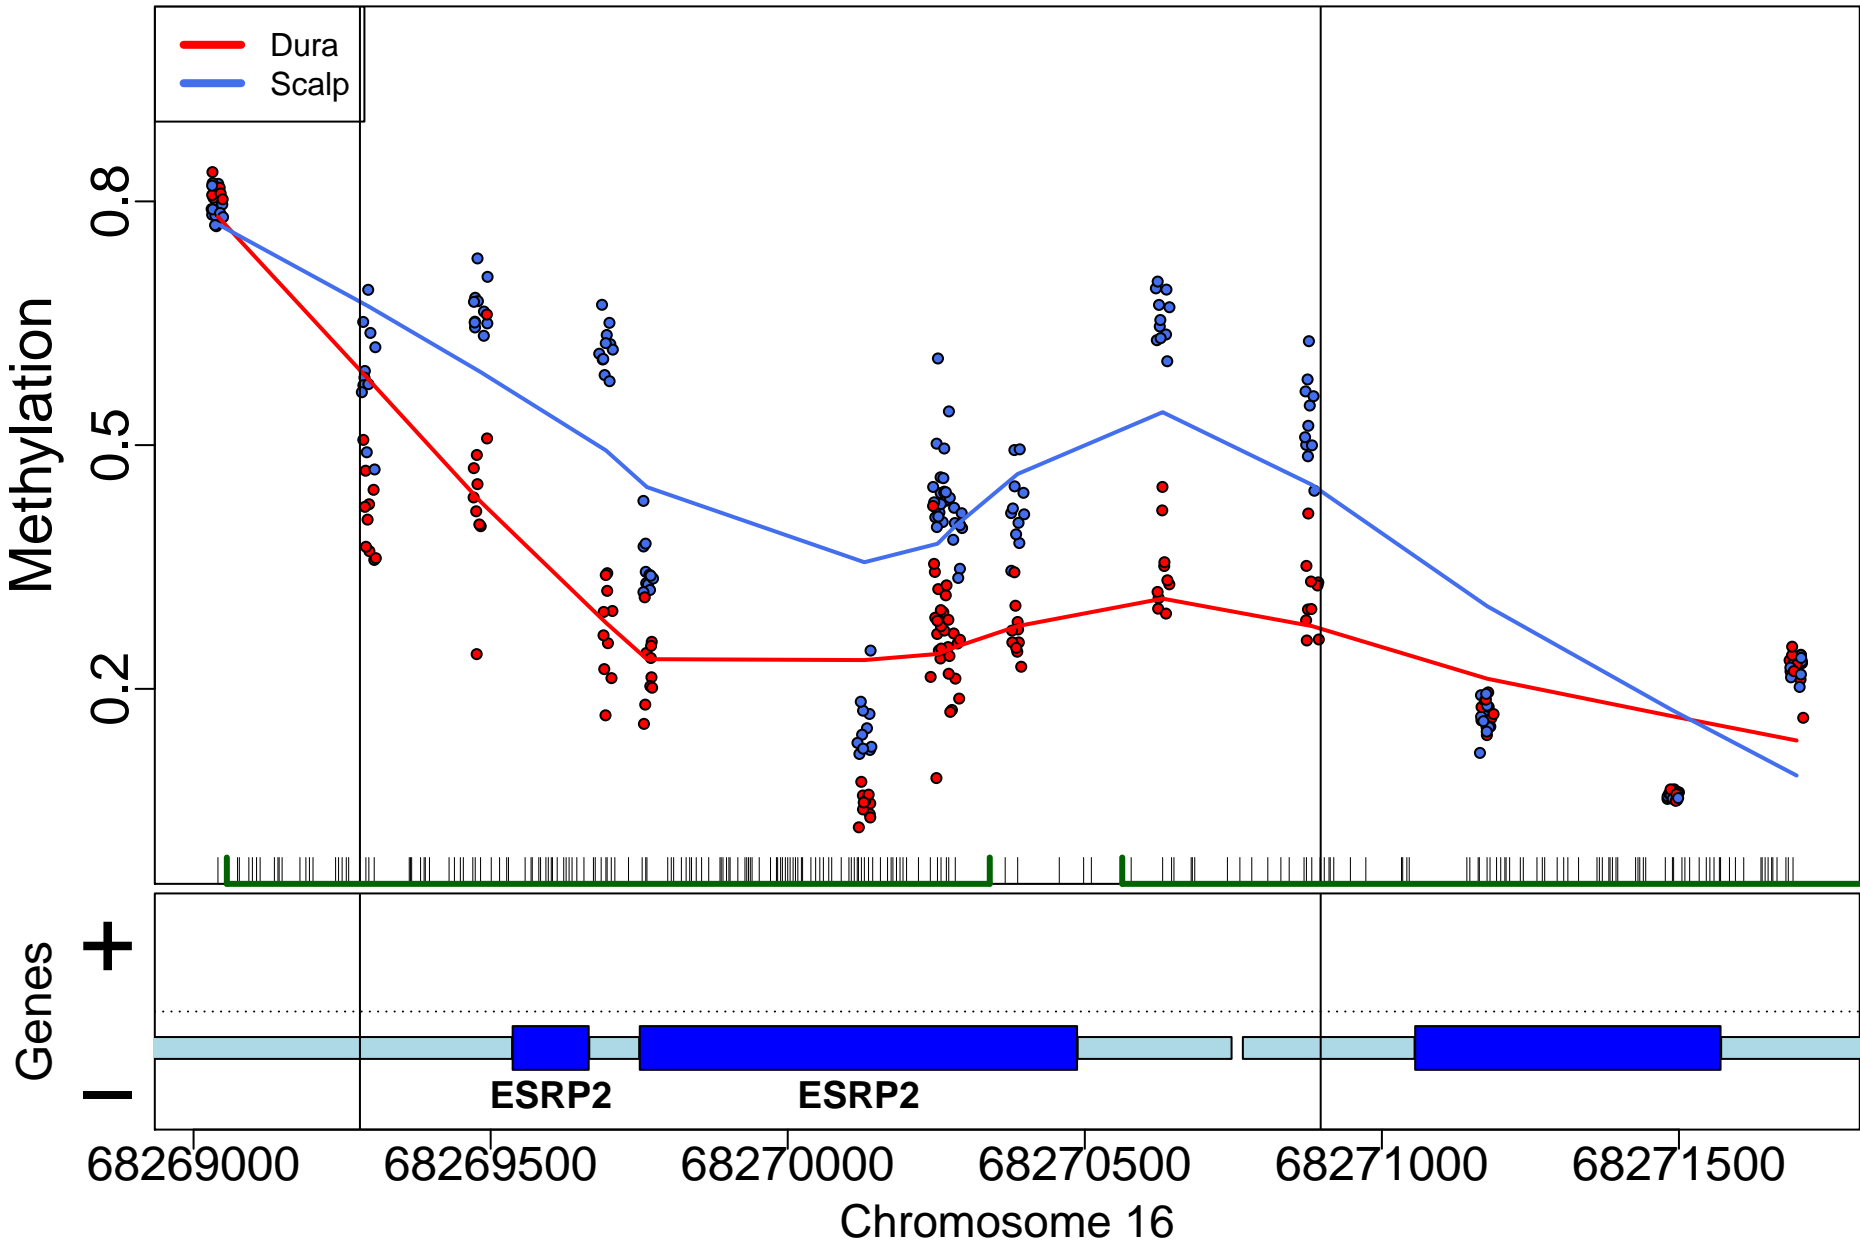

HOXA9; 800bp from tss:overlaps exon upstream

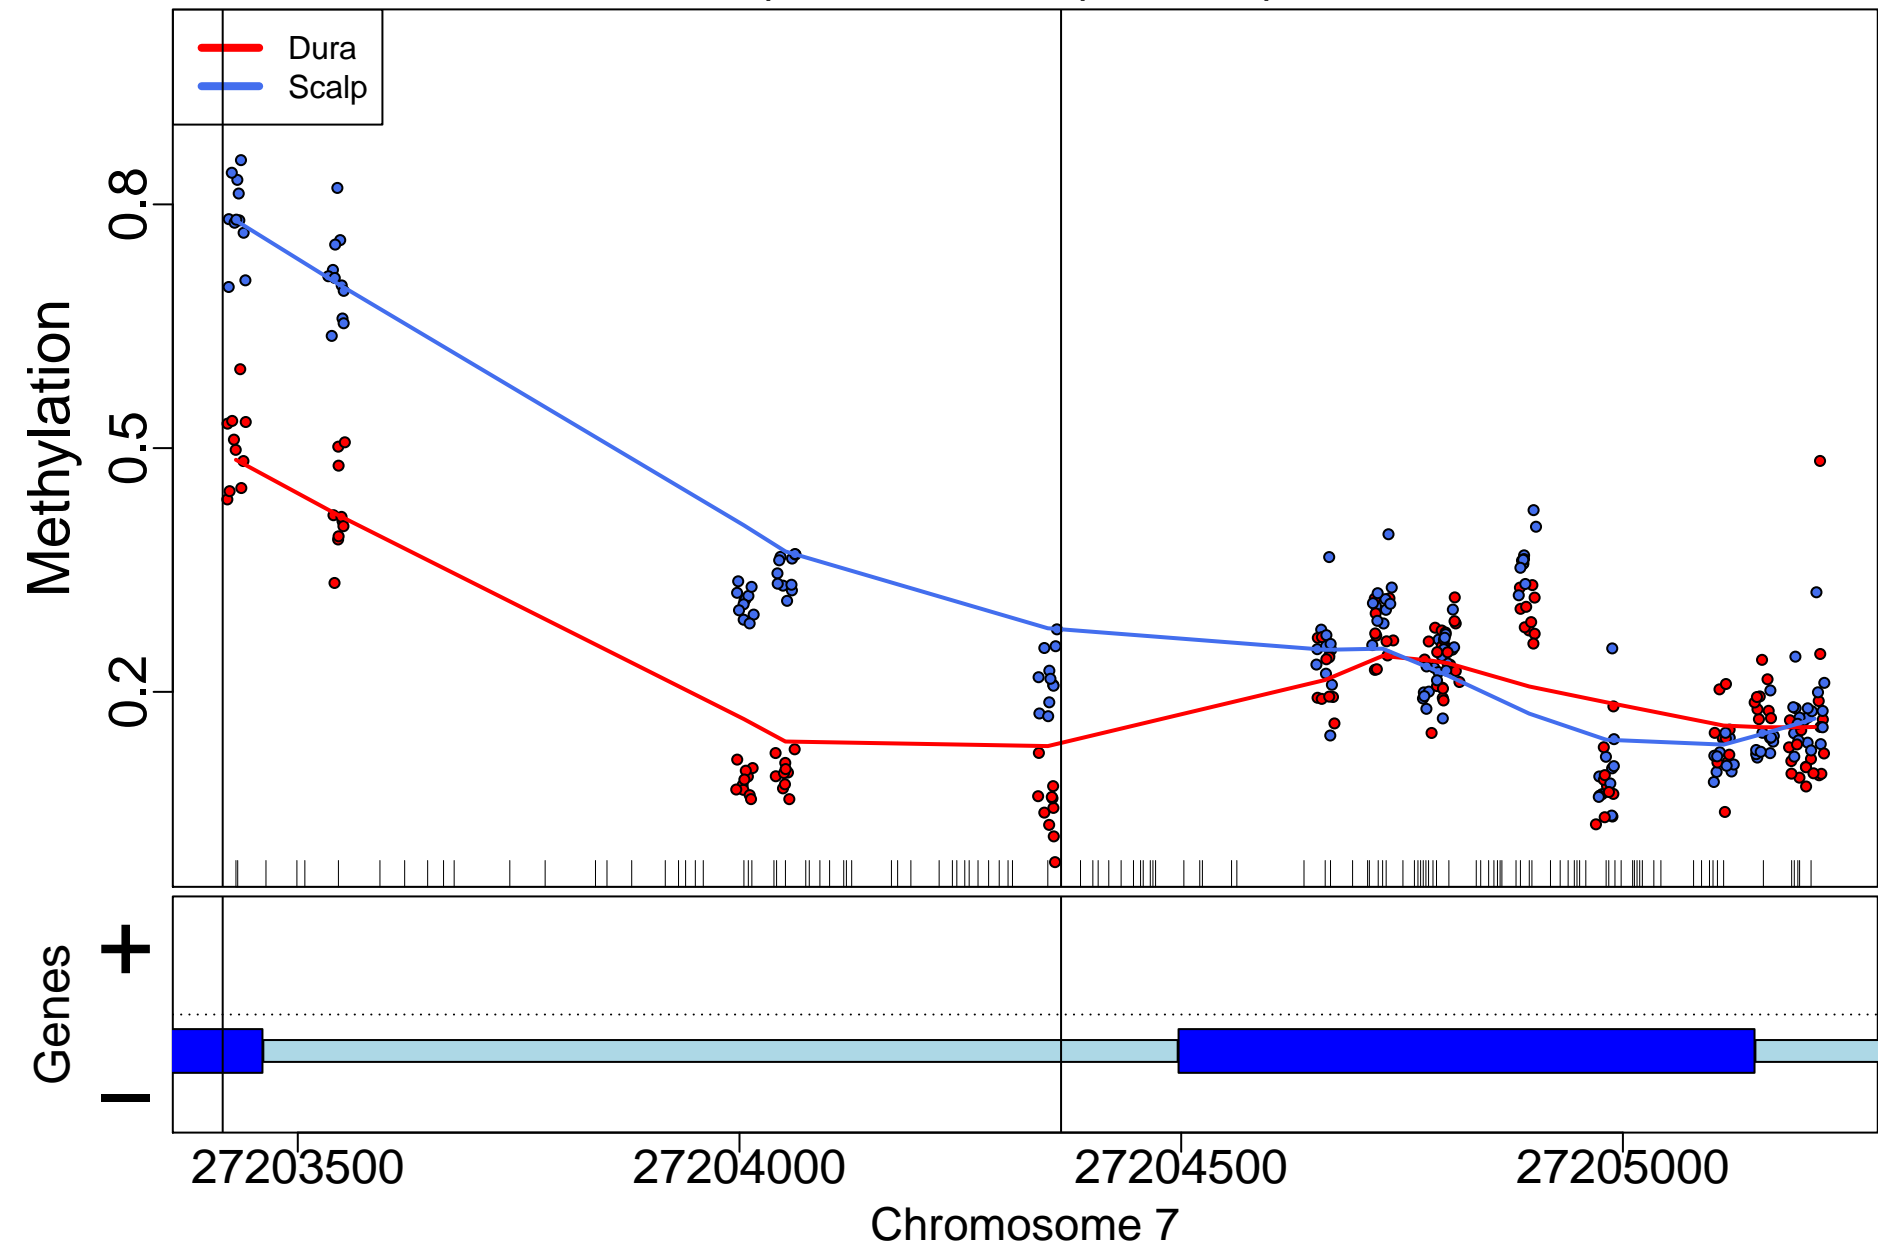



FMOD; 22189bp from tss:downstream

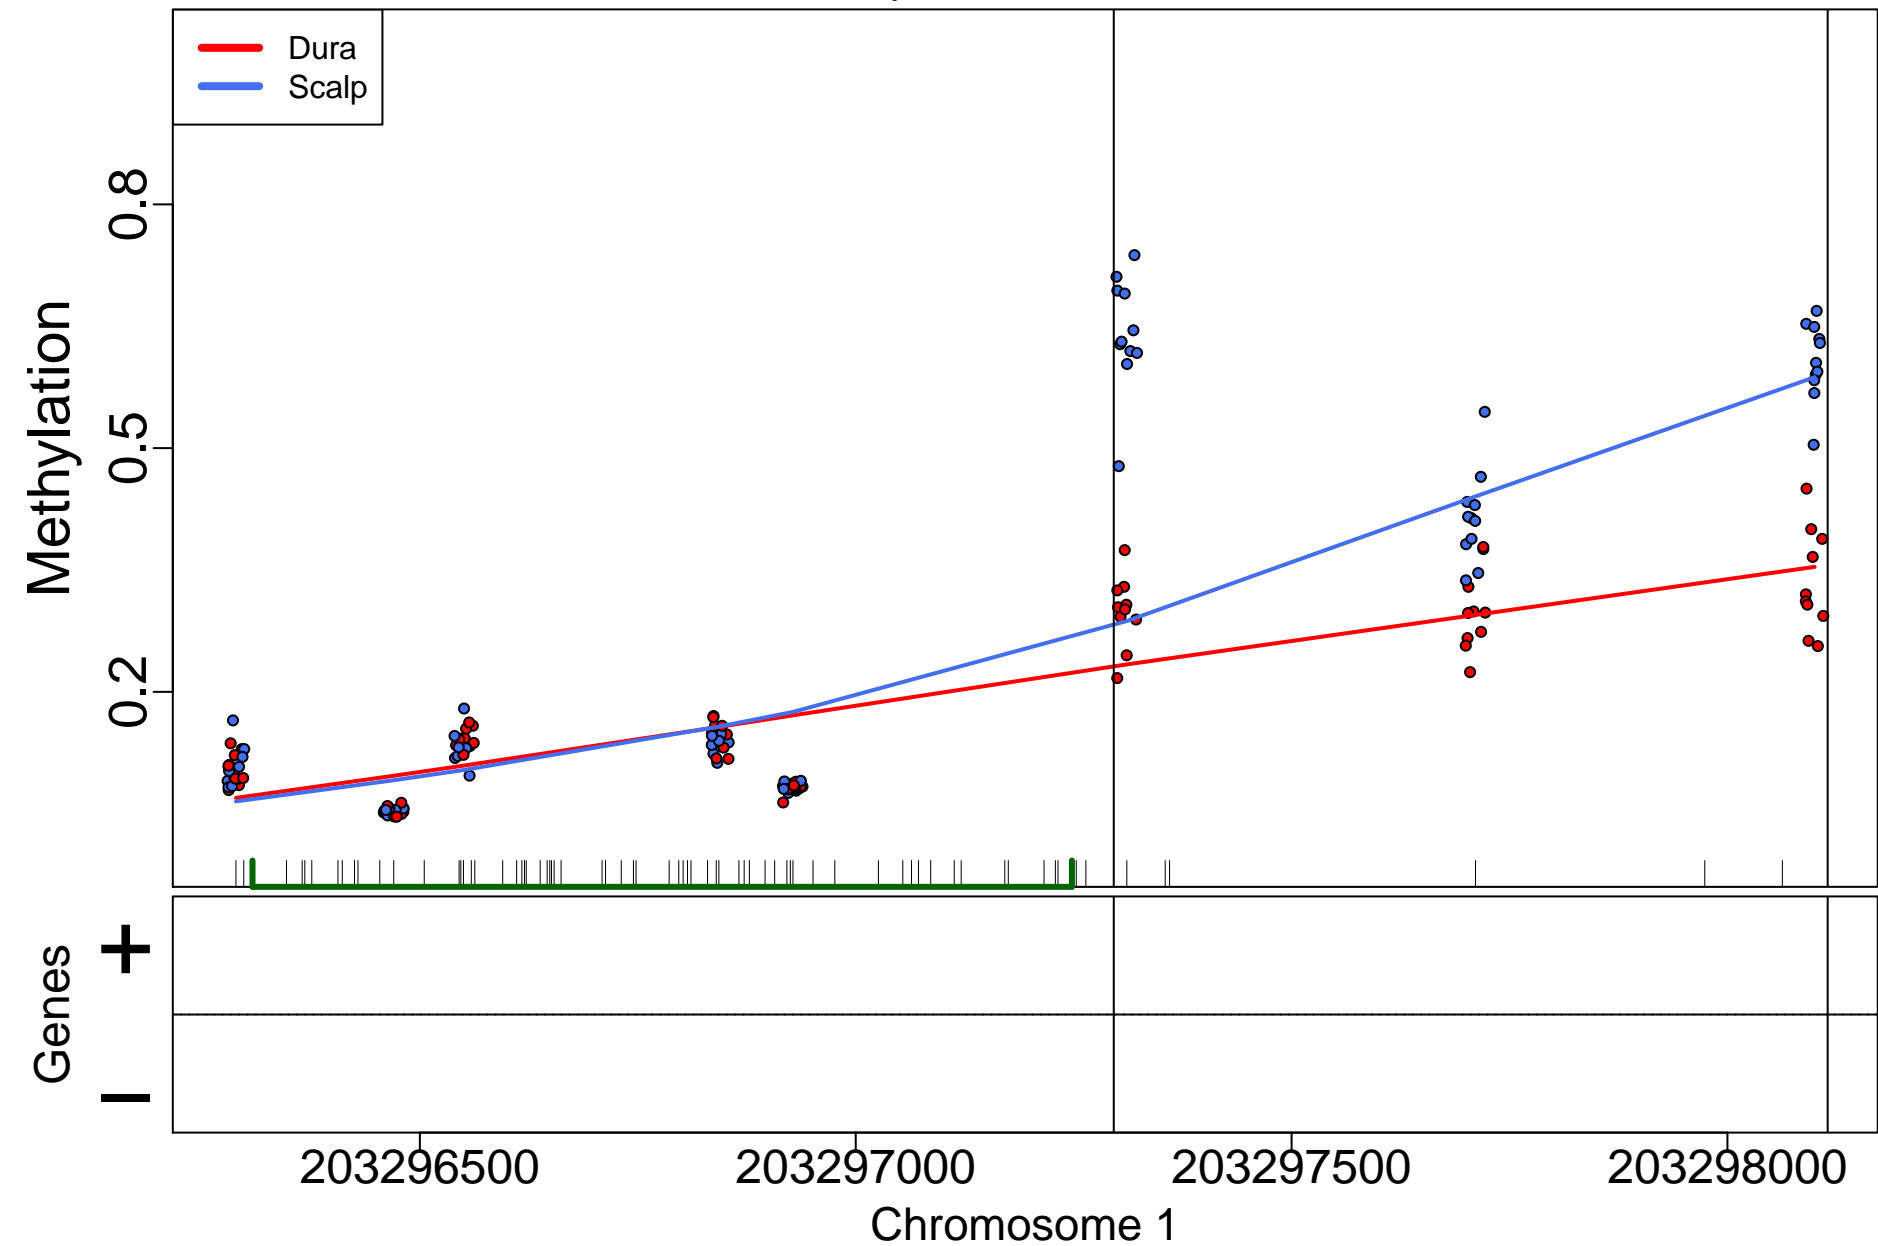

BCL6; 9031bp from tss:inside intron

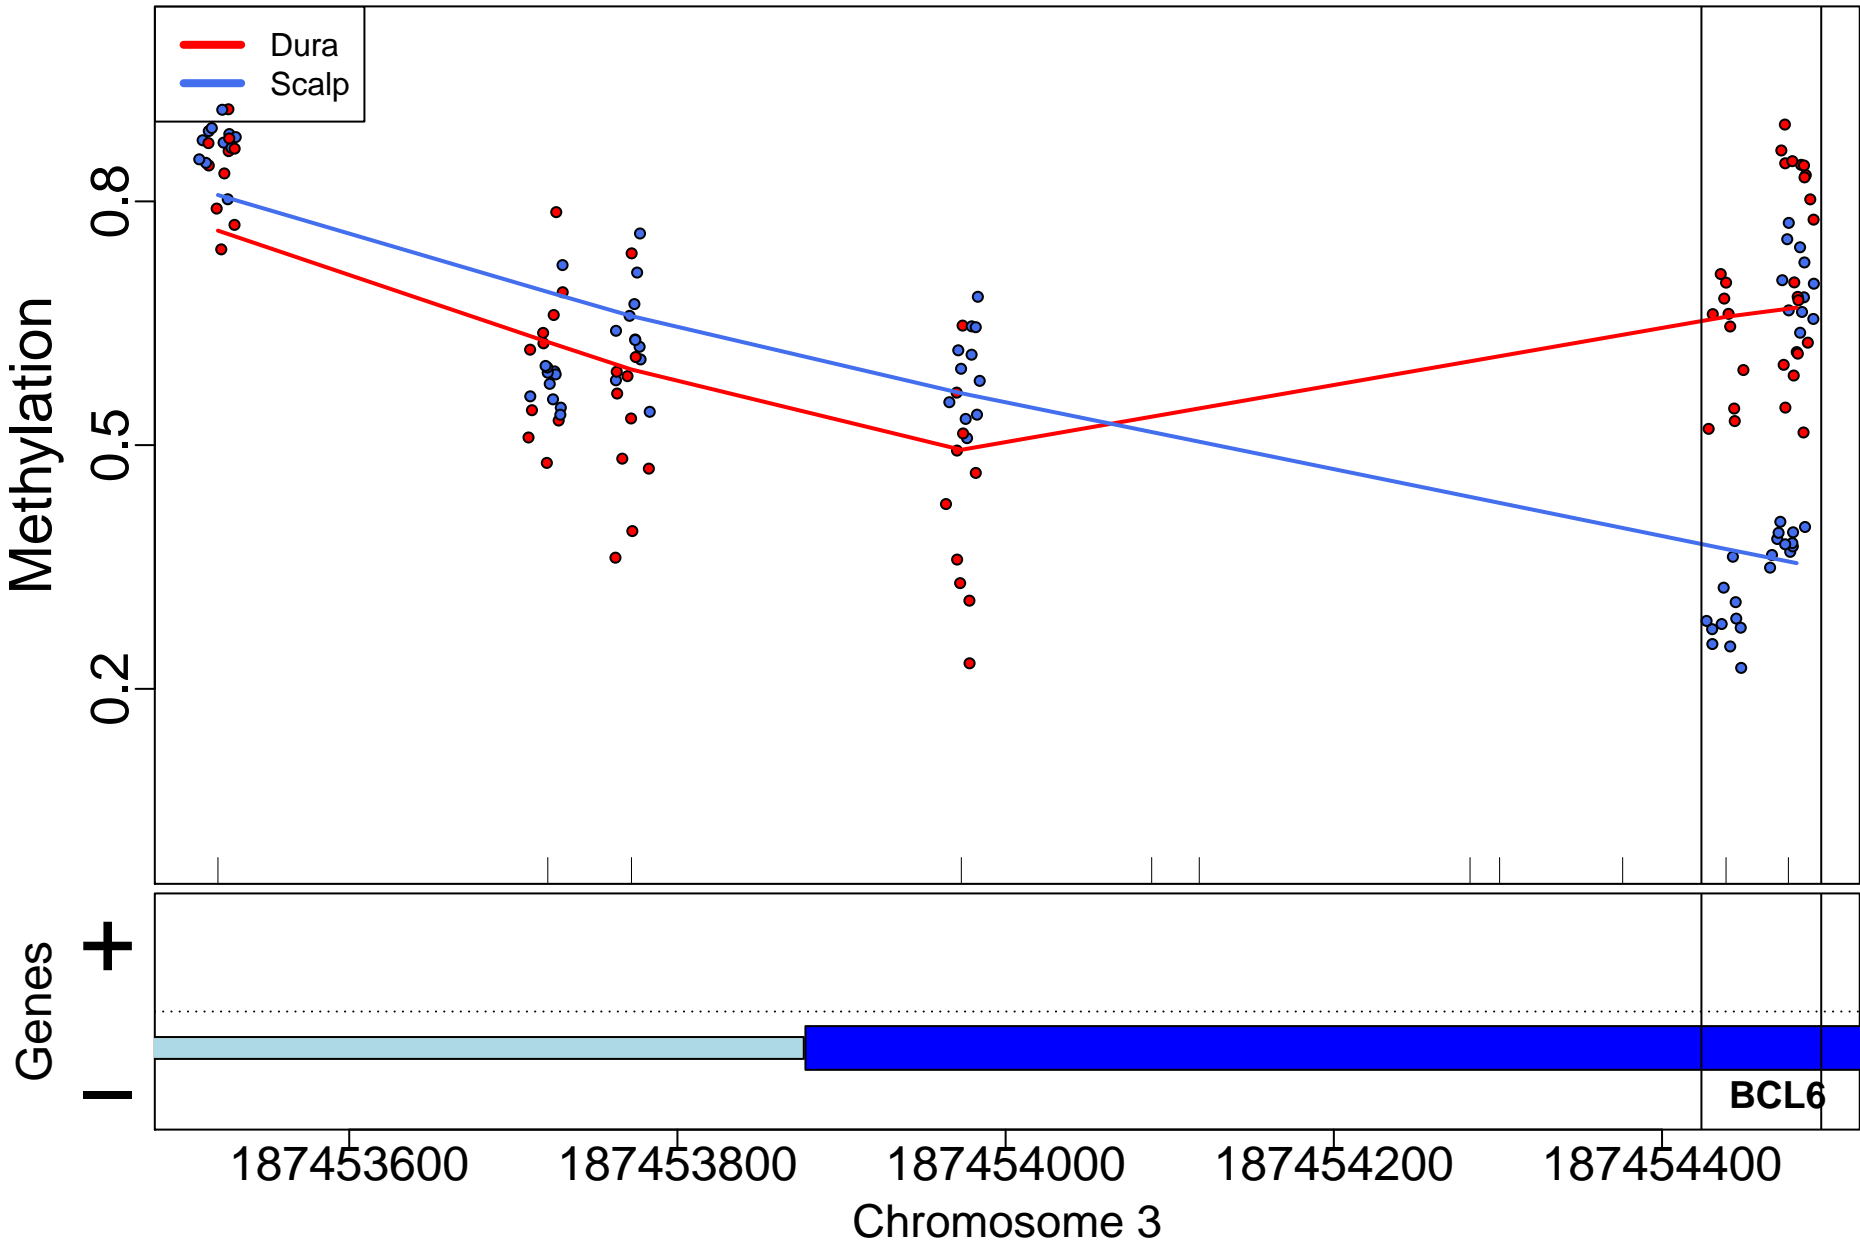

ZNF706; 17635bp from tss:upstream

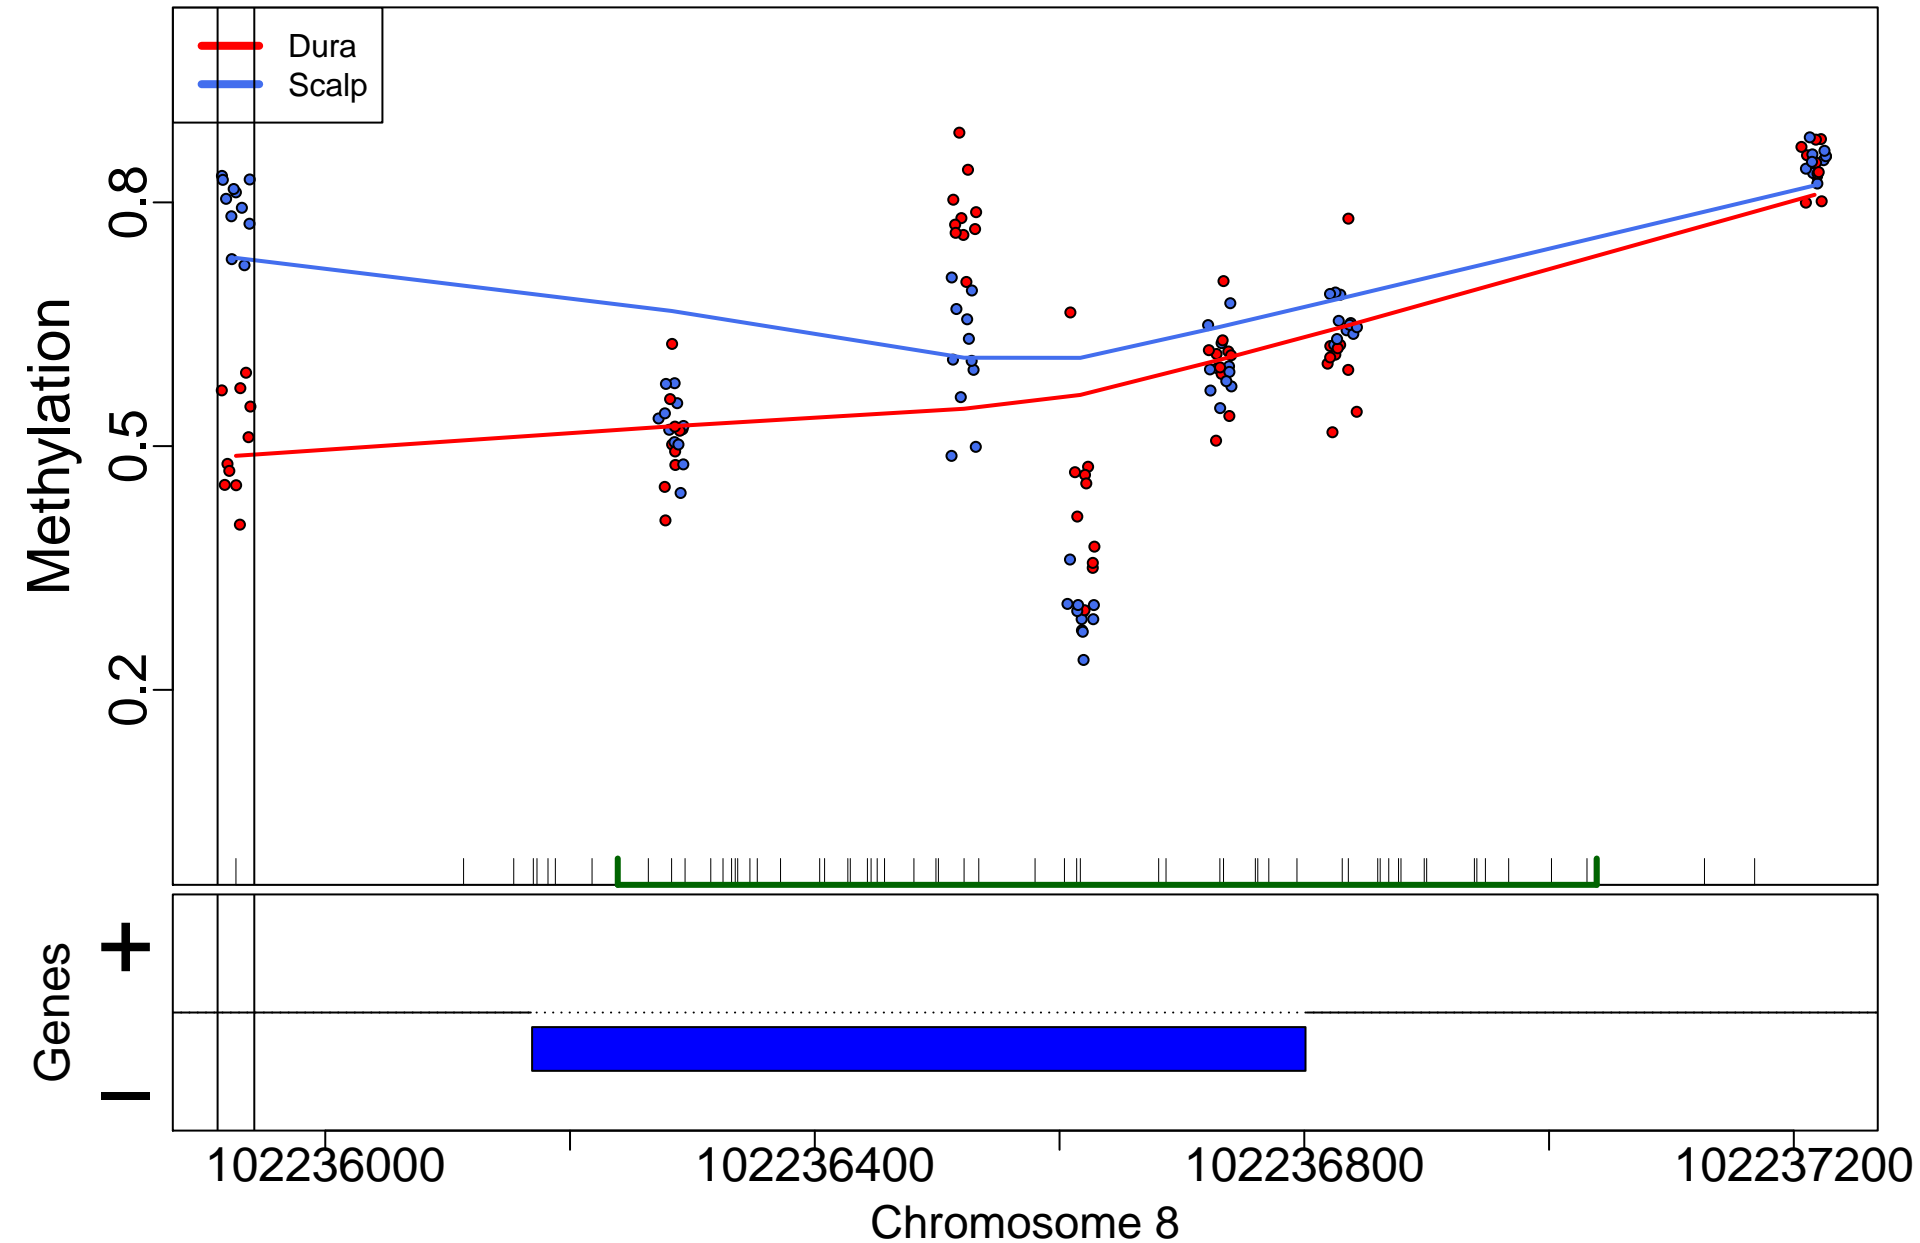

CEP120; 625bp from tss:promoter

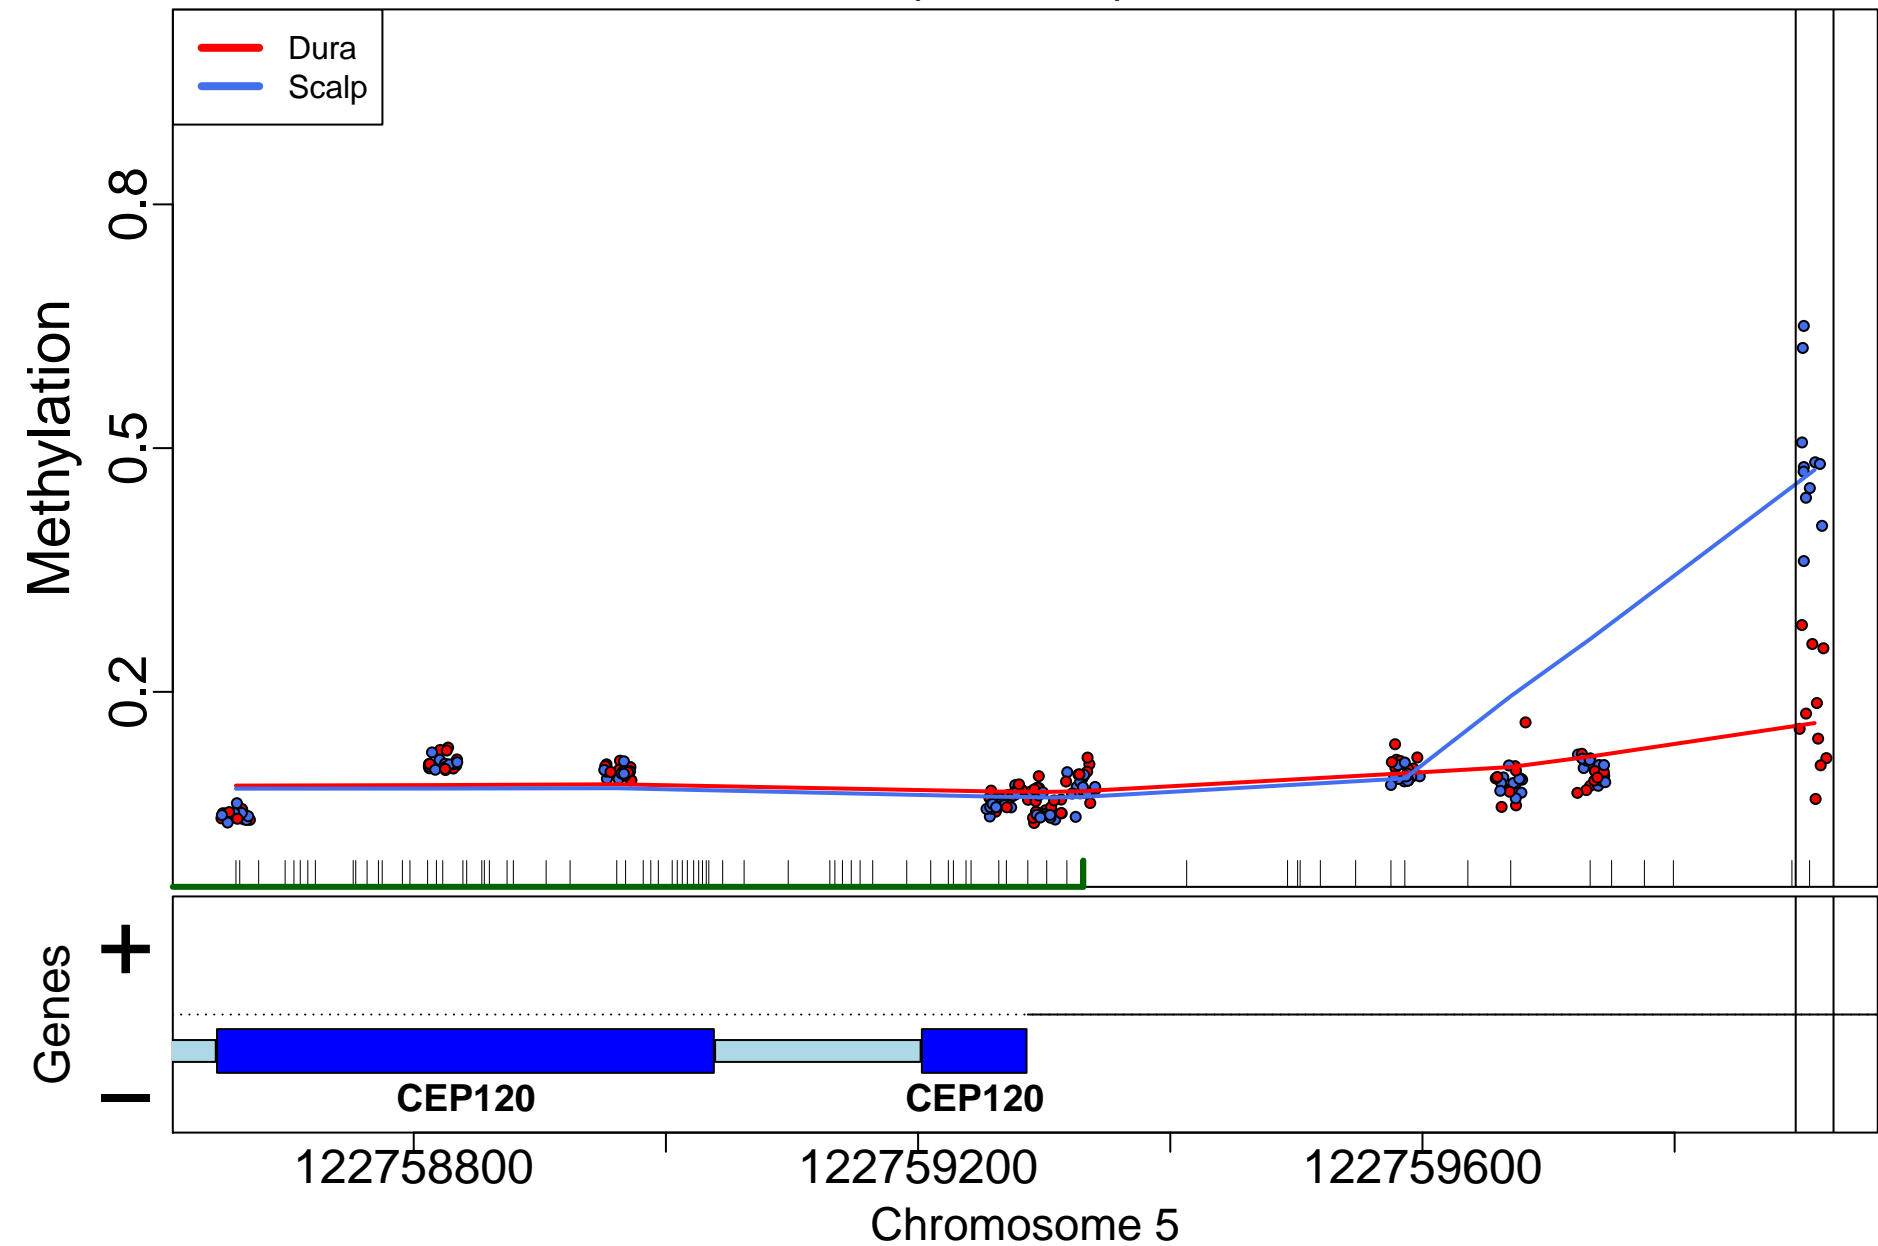

PLAT; 1034bp from tss:promoter

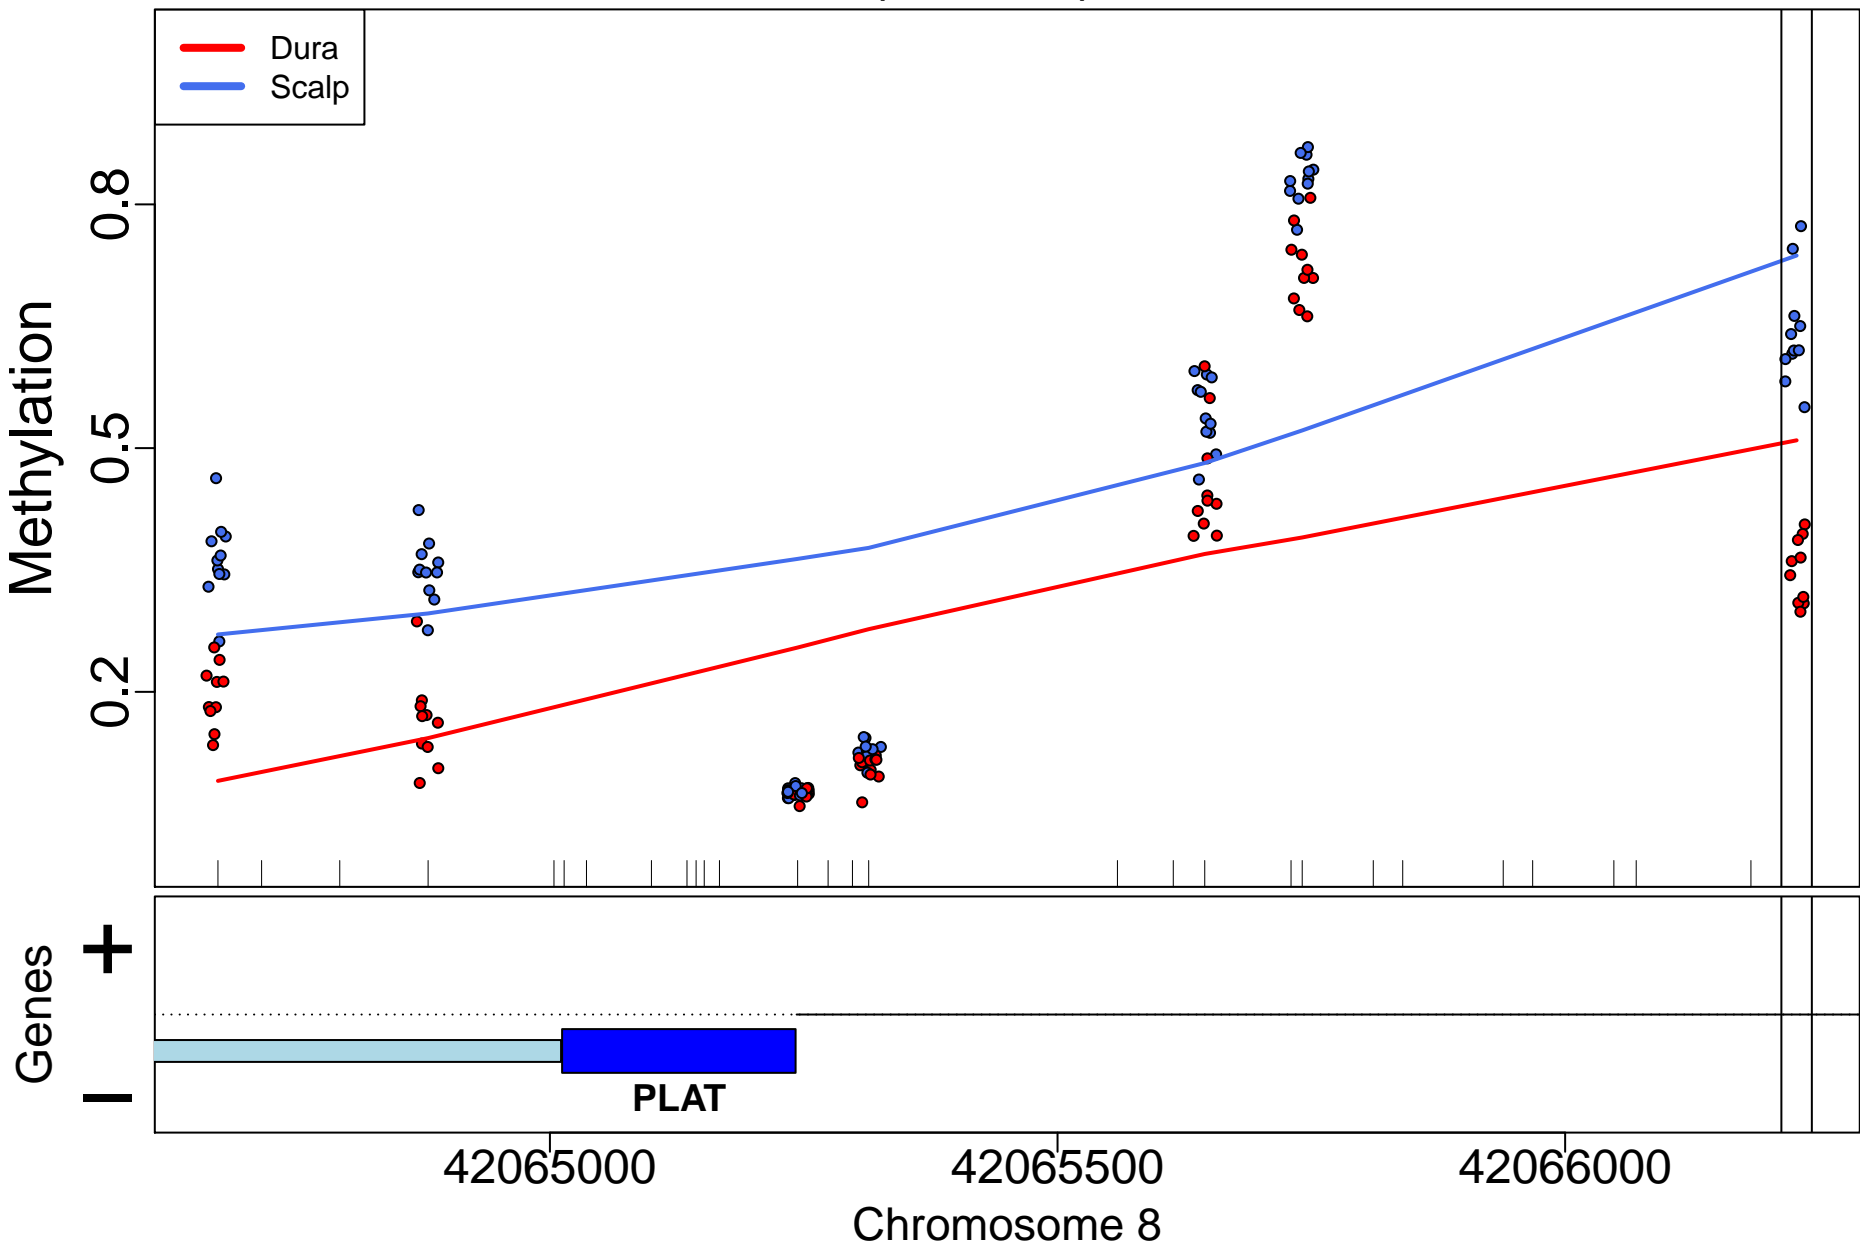

VAC14; 44645bp from tss:downstream

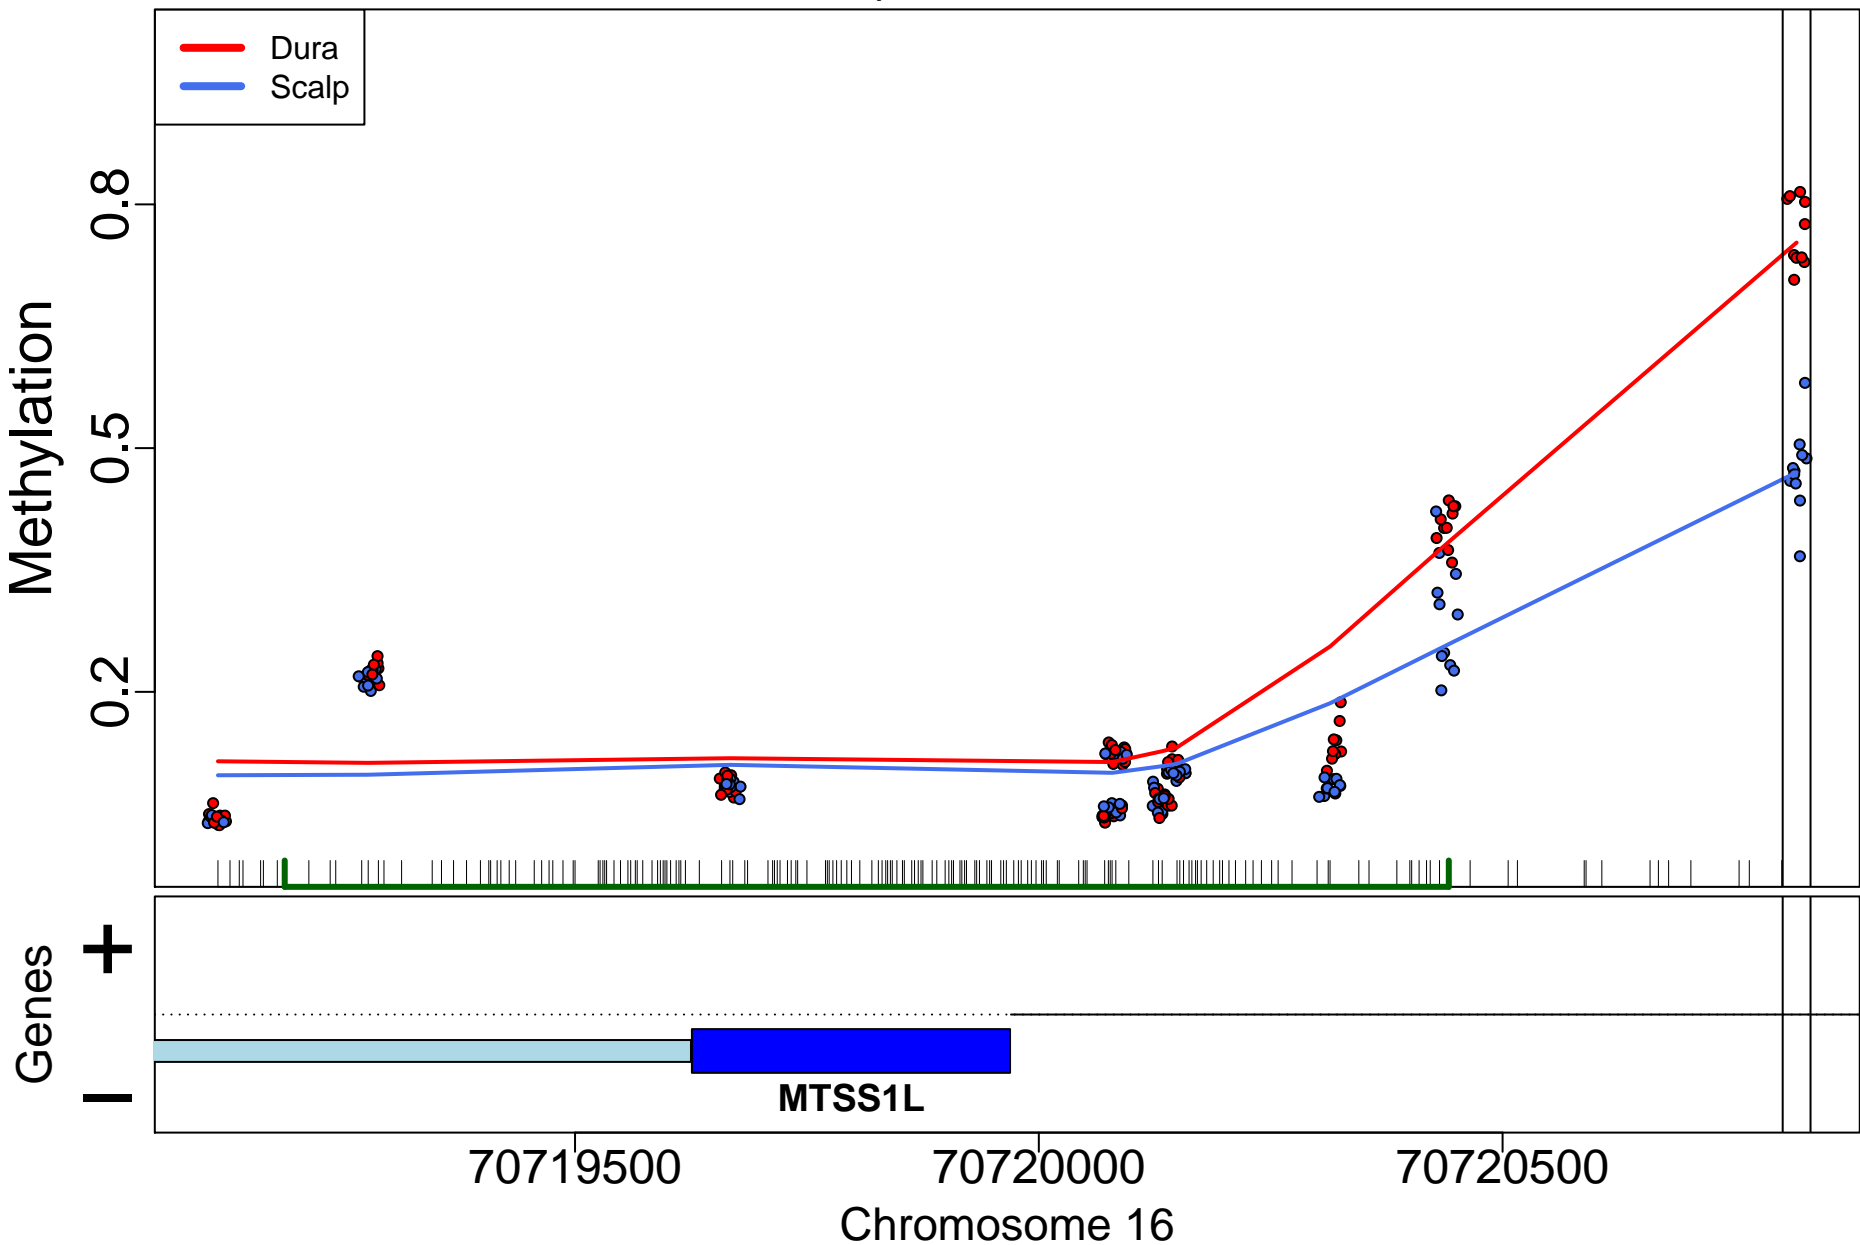

RASA3; 0bp from tss:NA

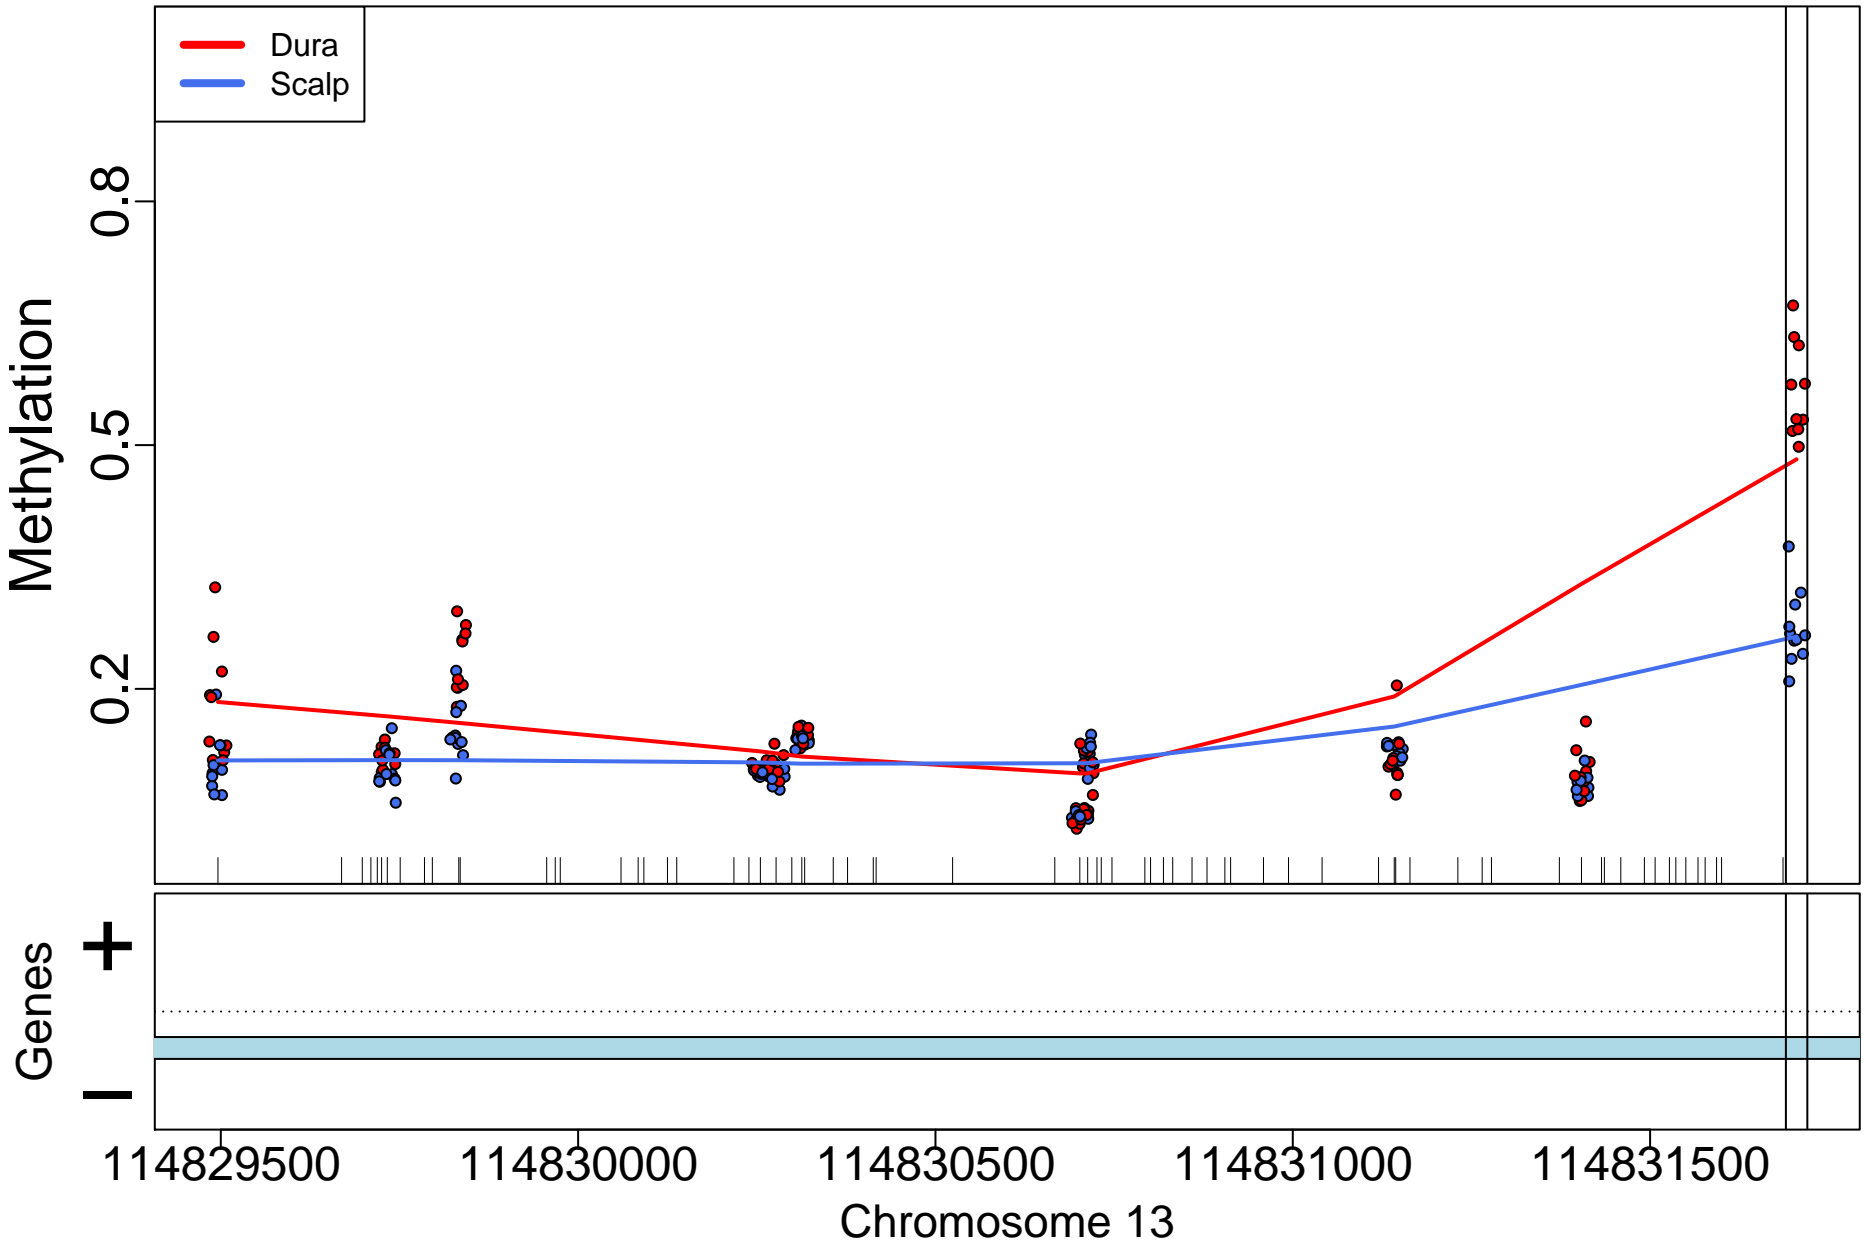

CUX1; 97518bp from tss:inside intron

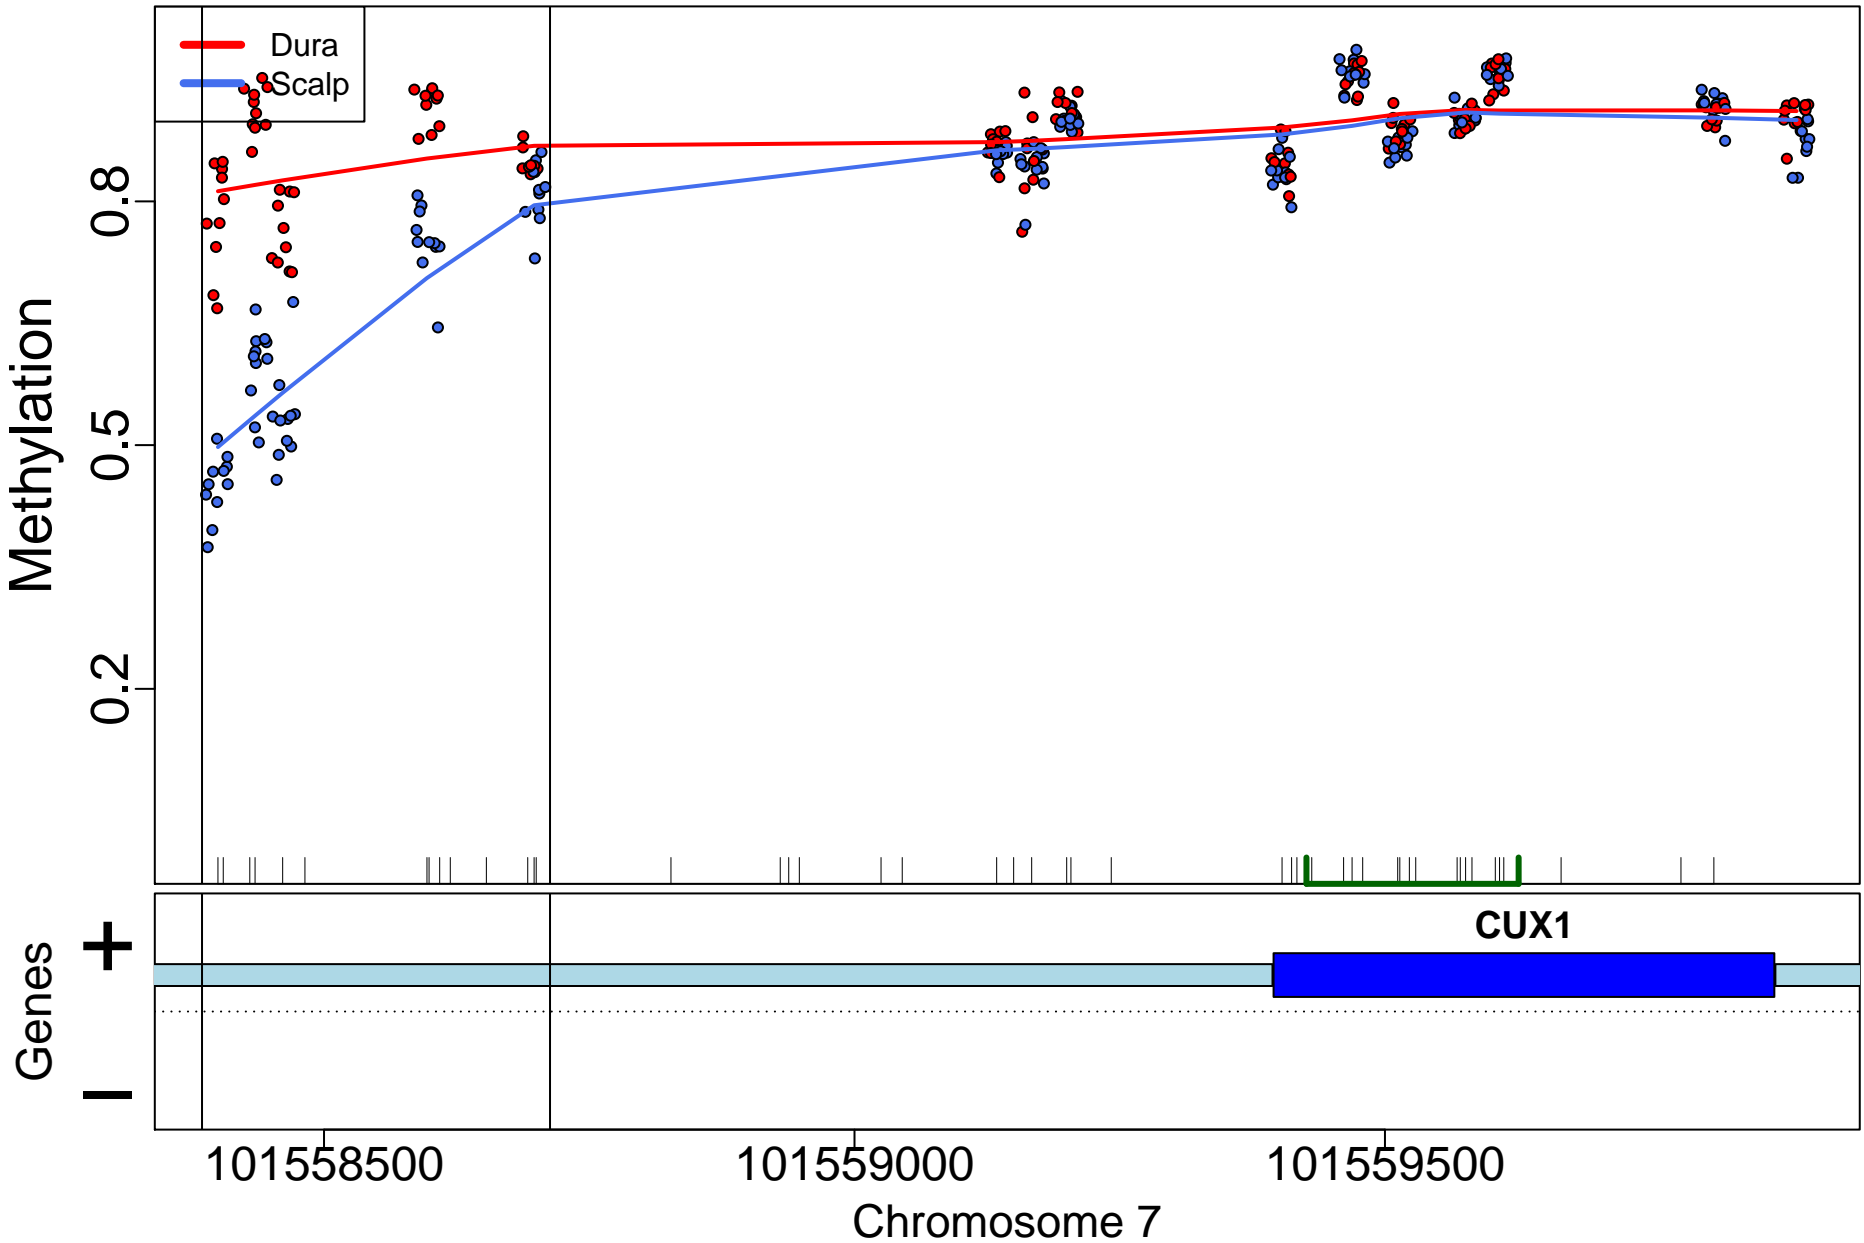



CADM1; 857bp from tss:promoter

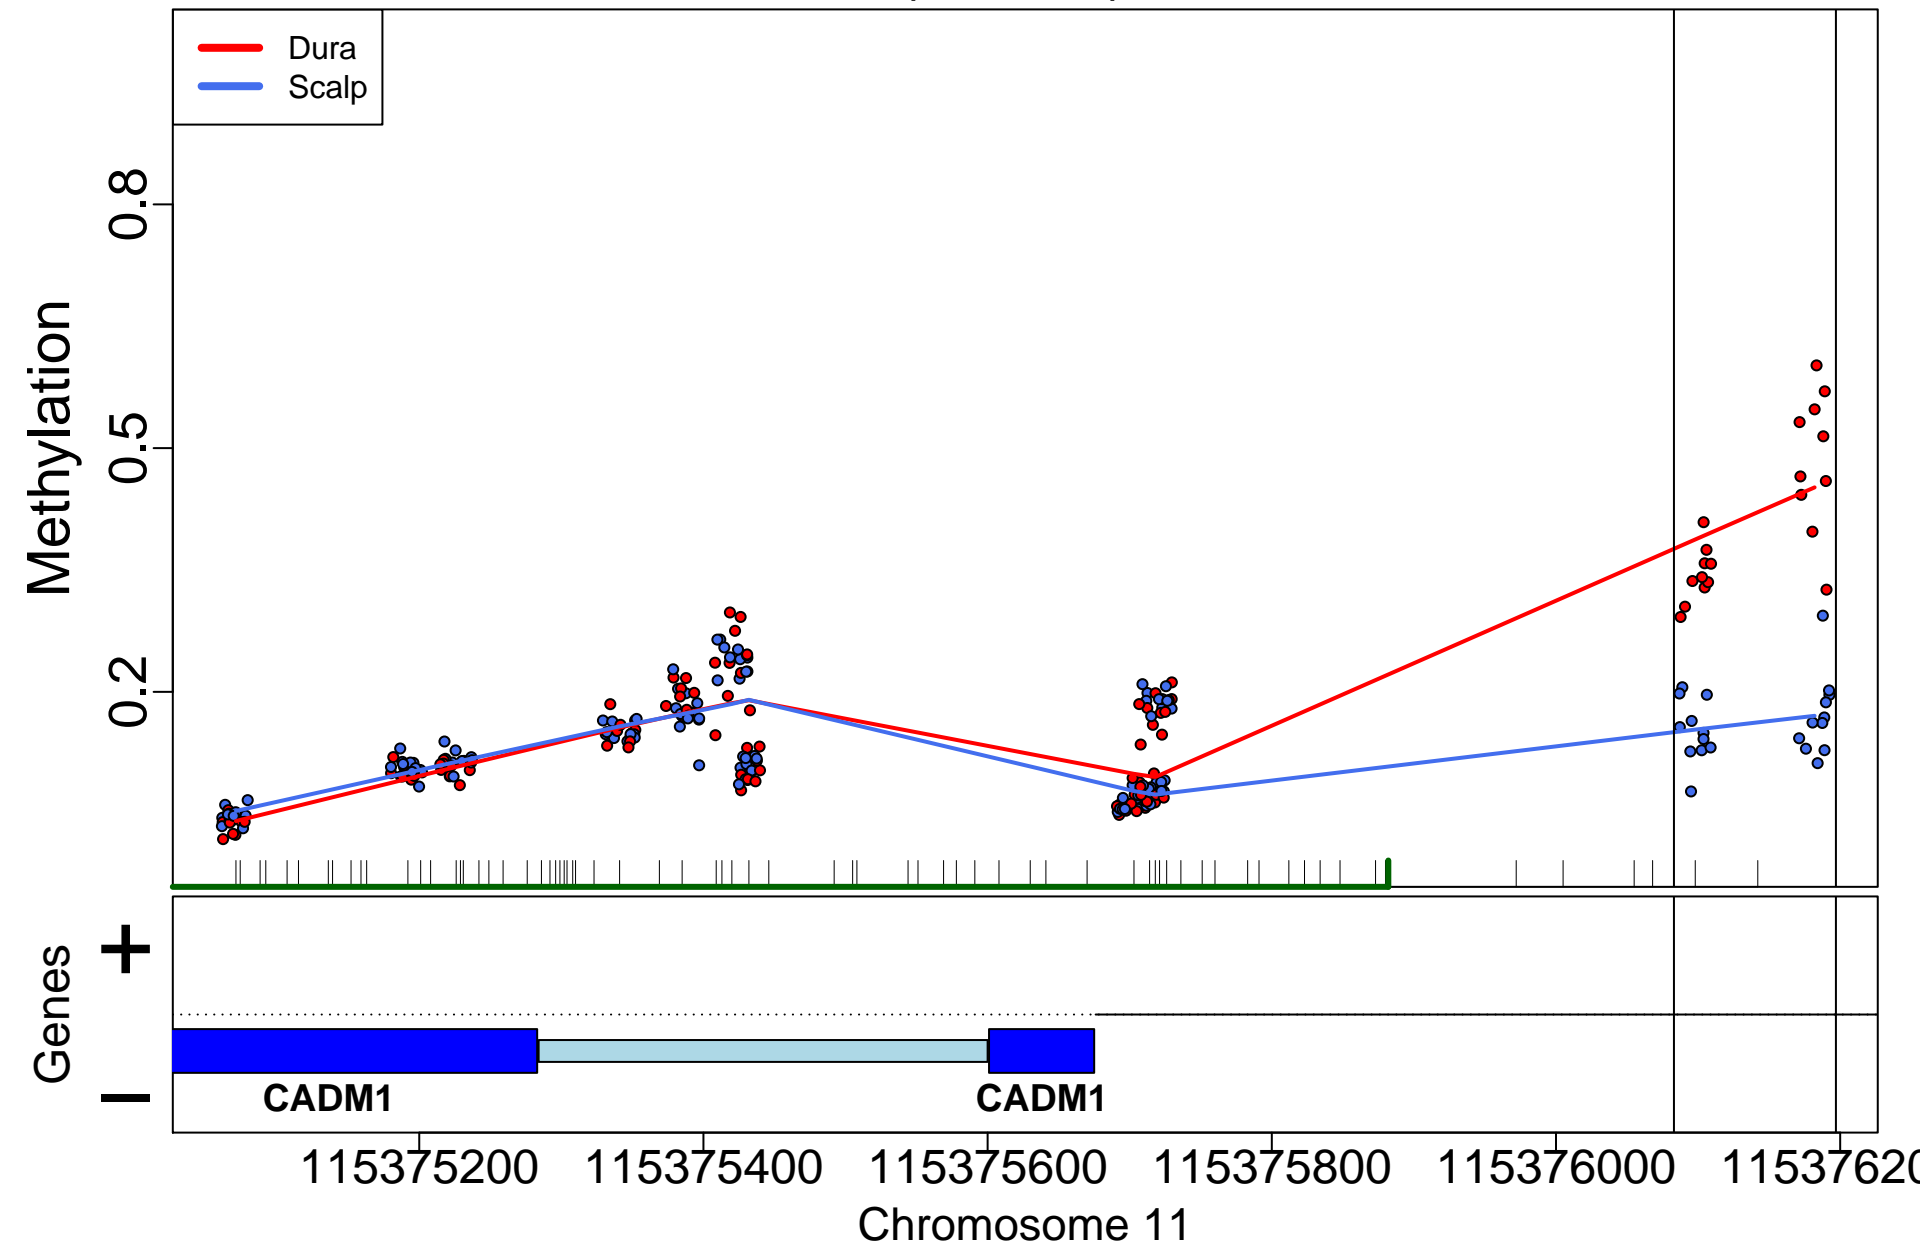

AQP1; 0bp from tss:overlaps 5'

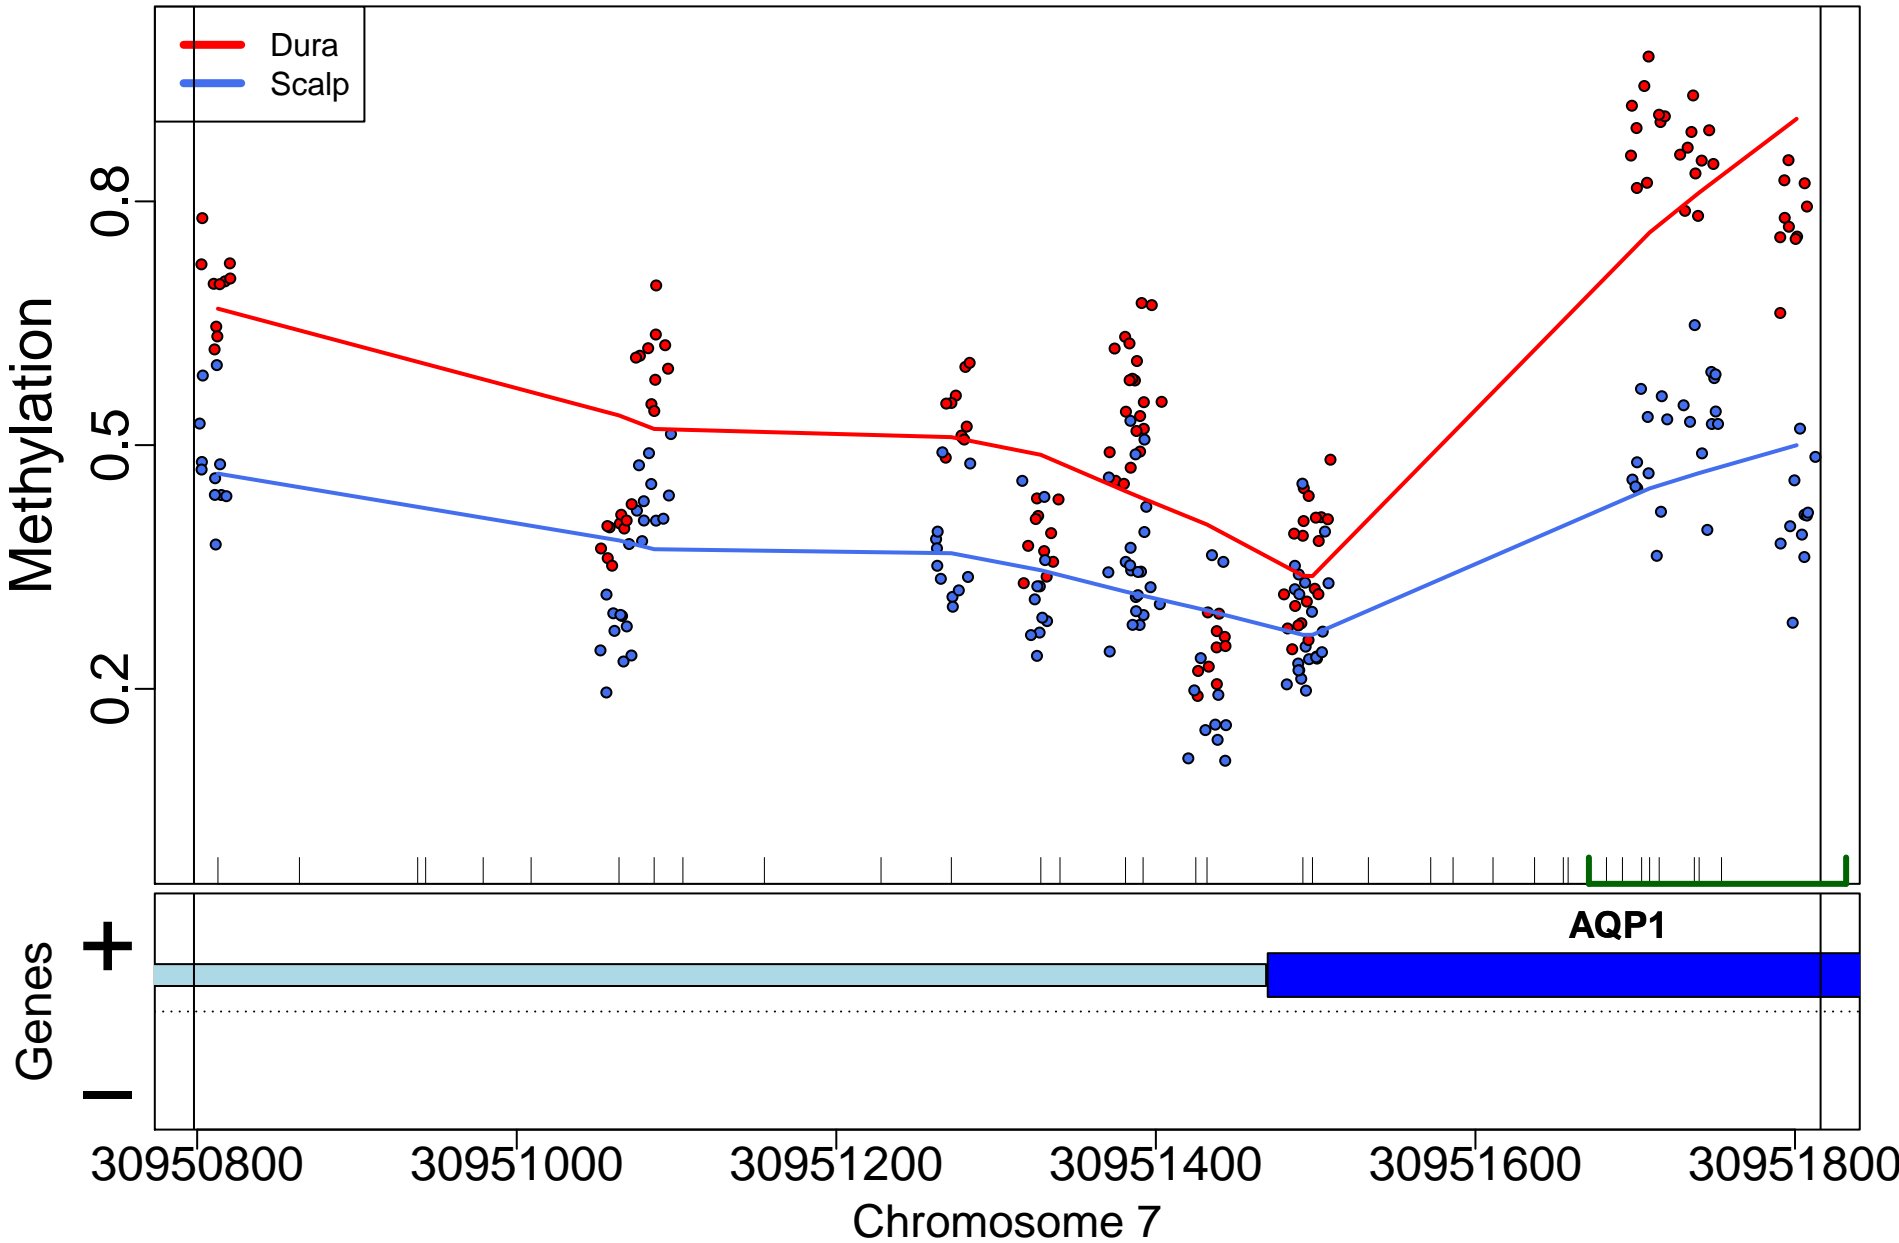

MIR196B; 0bp from tss:NA

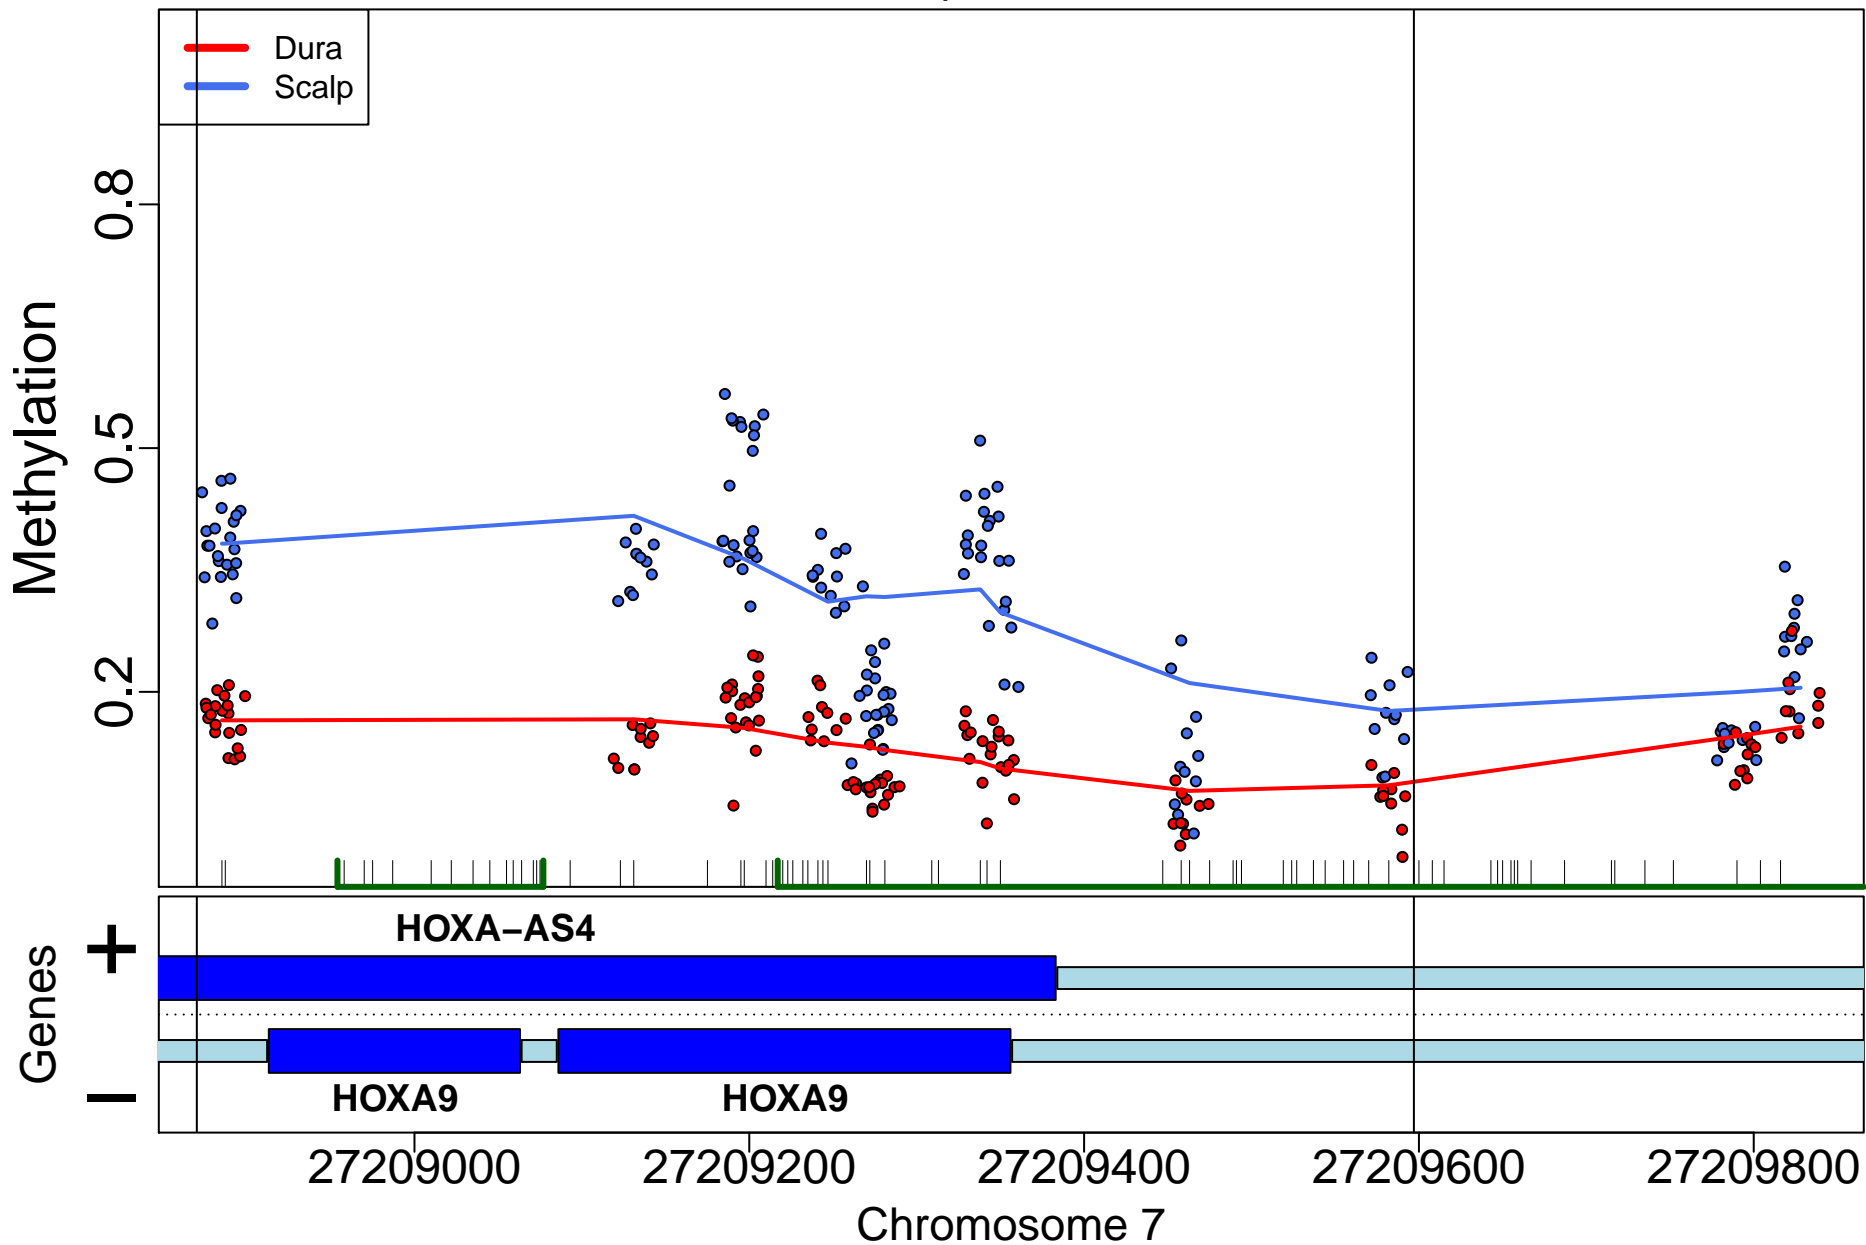

# HSPA2; 964bp from tss:promoter

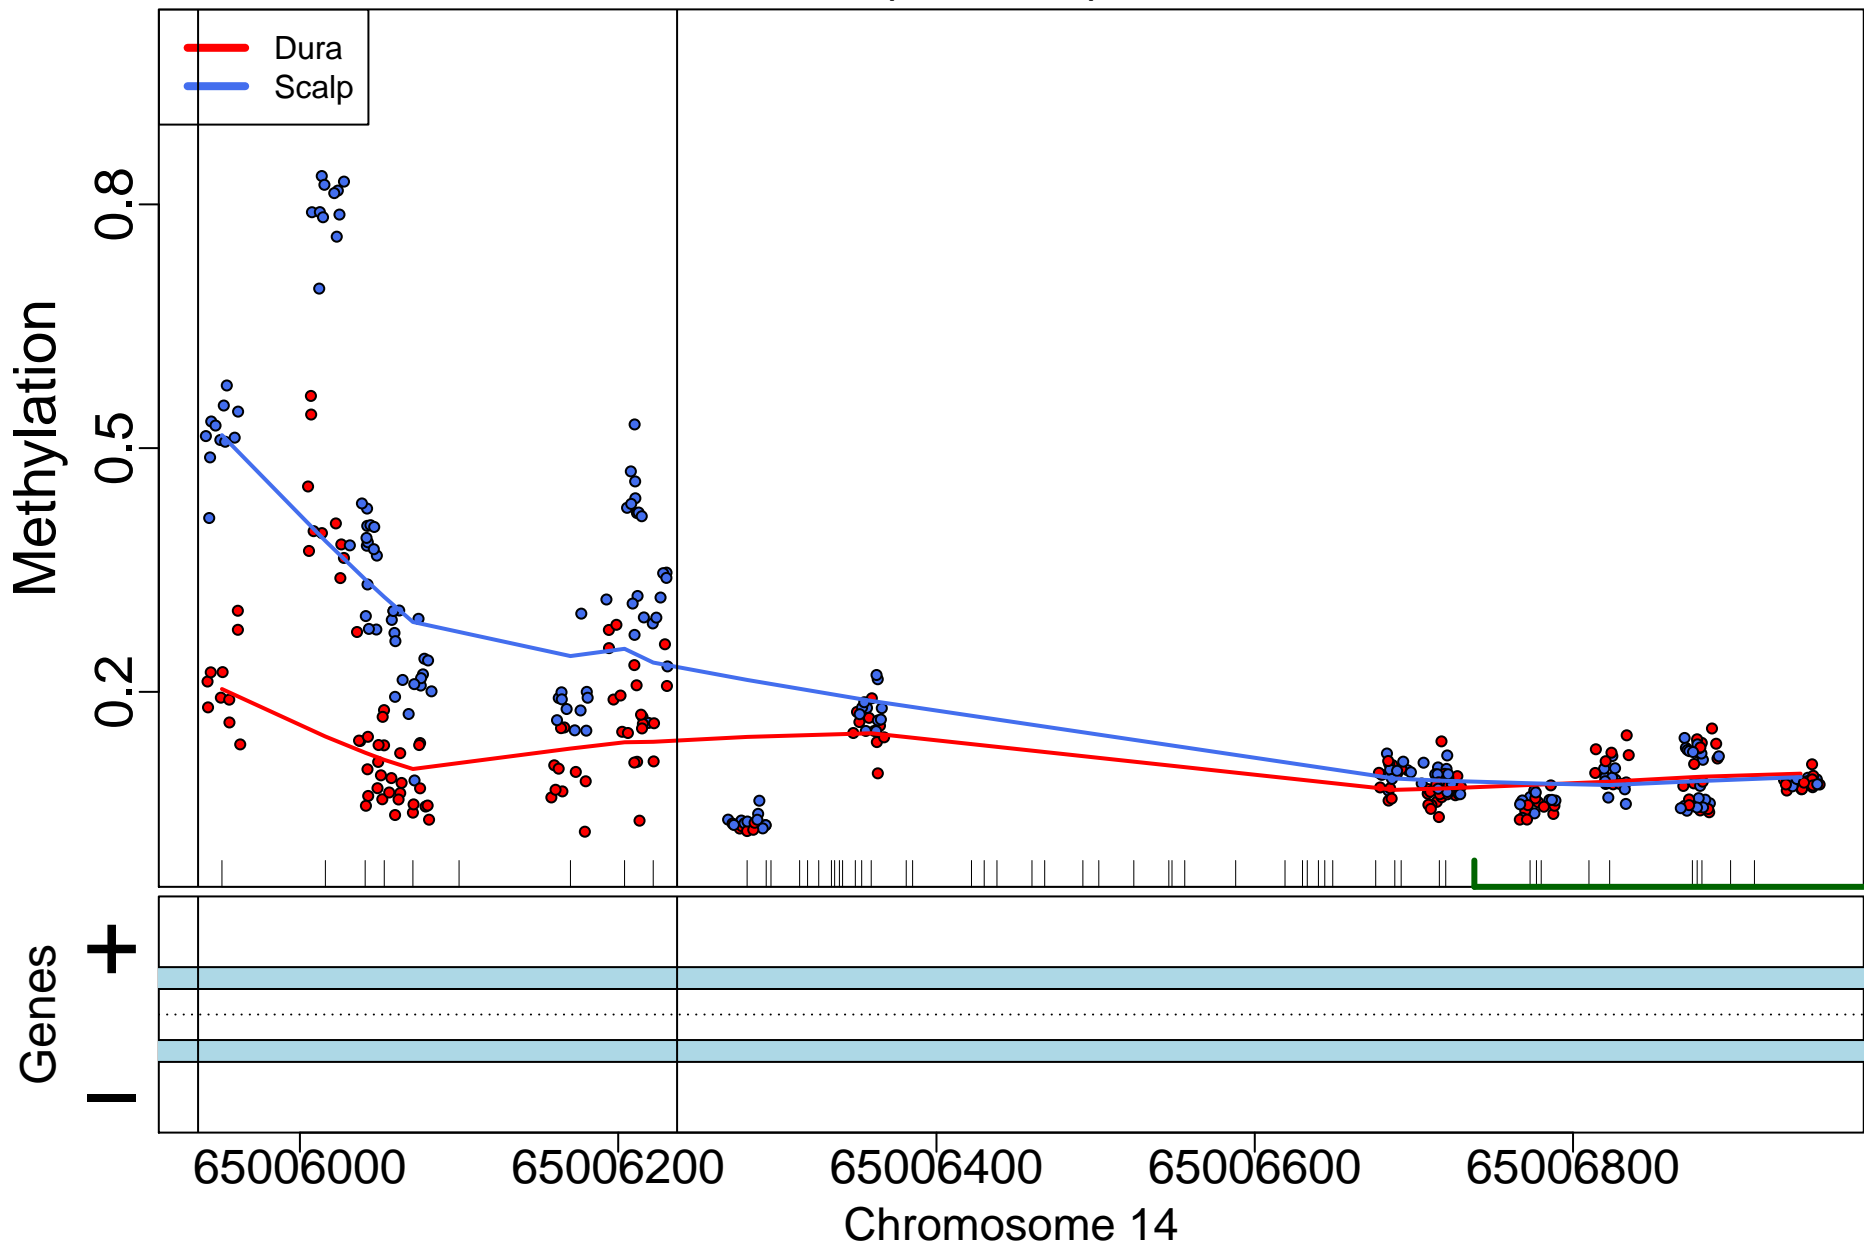

CALCOCO1; 19237bp from tss:downstream

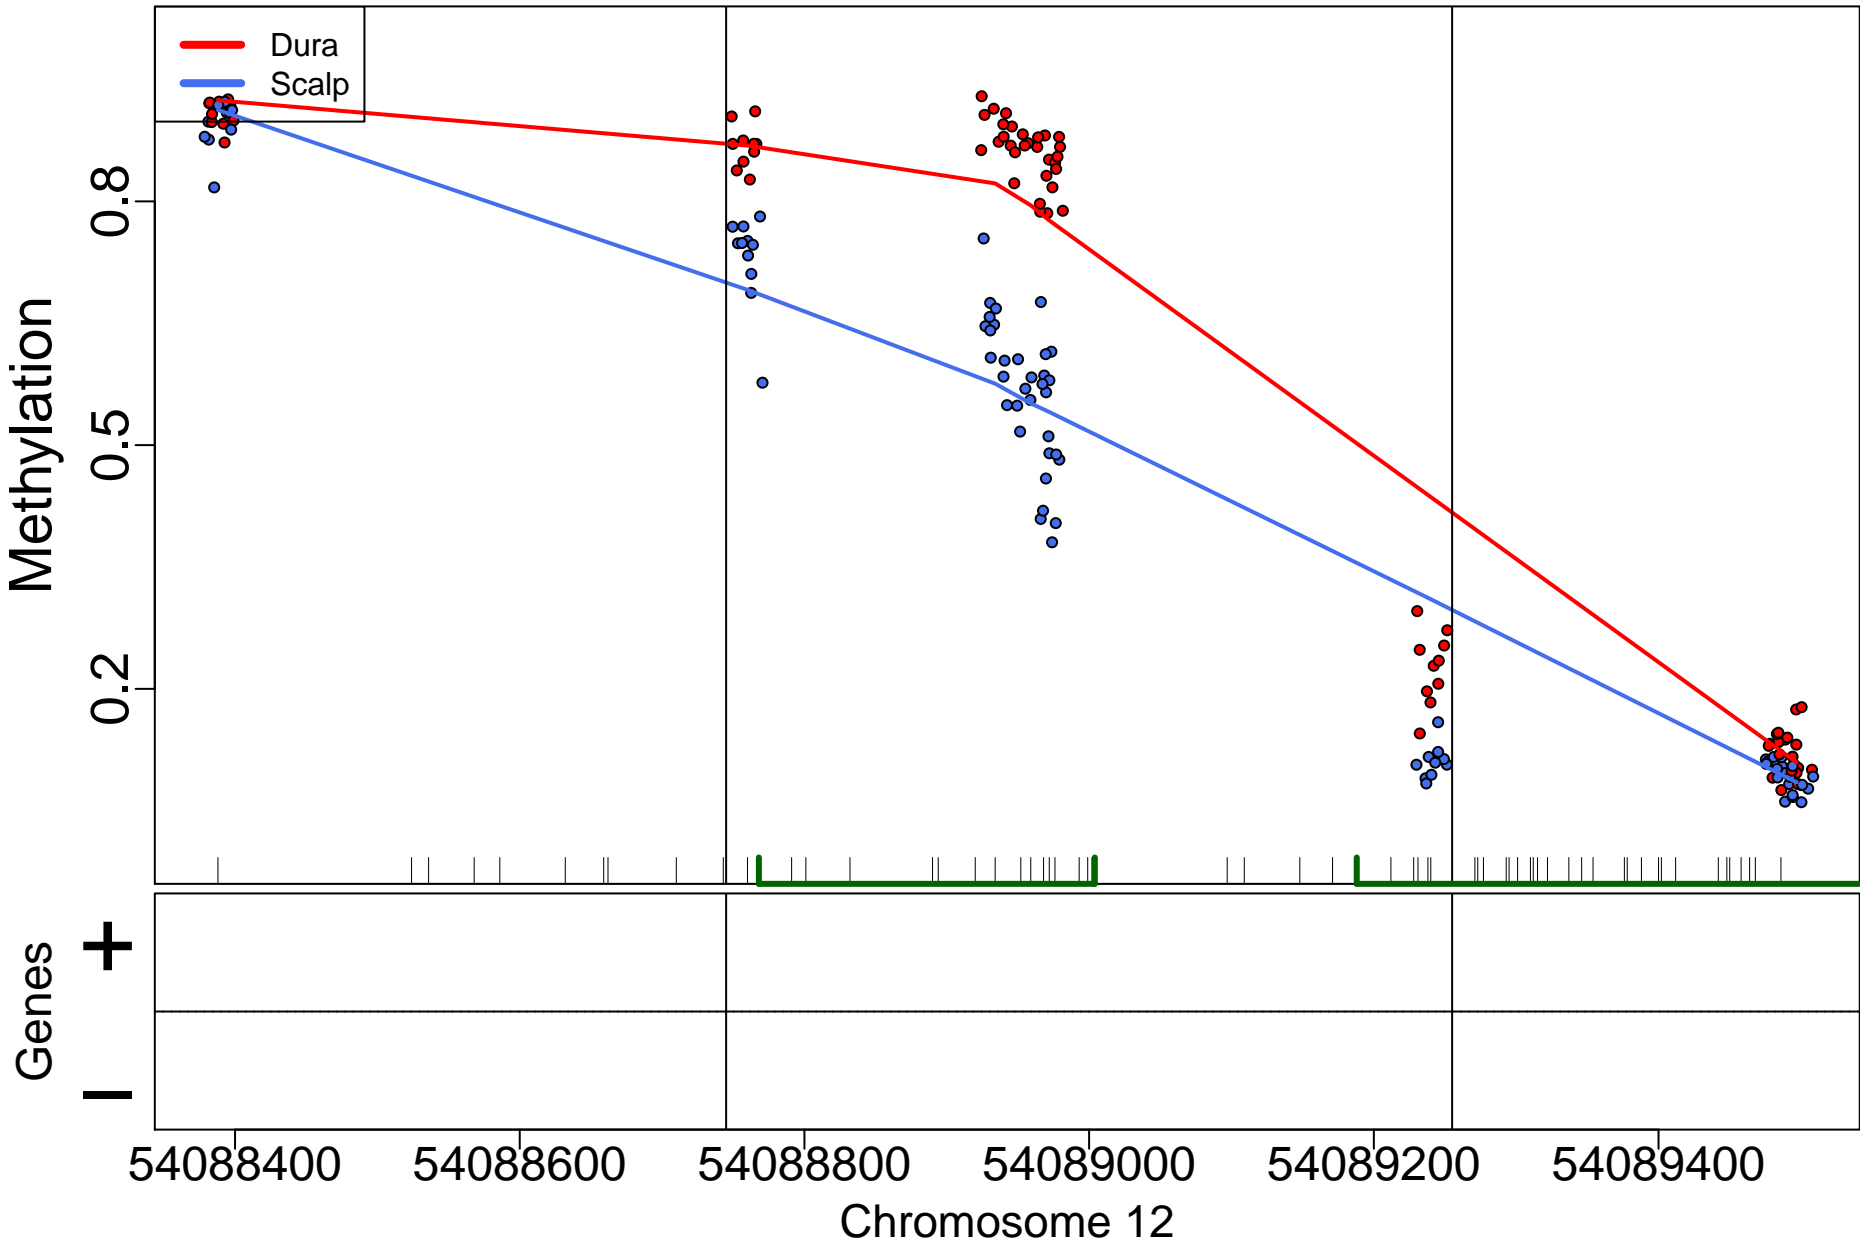

# CDC42EP3; 98bp from tss:promoter

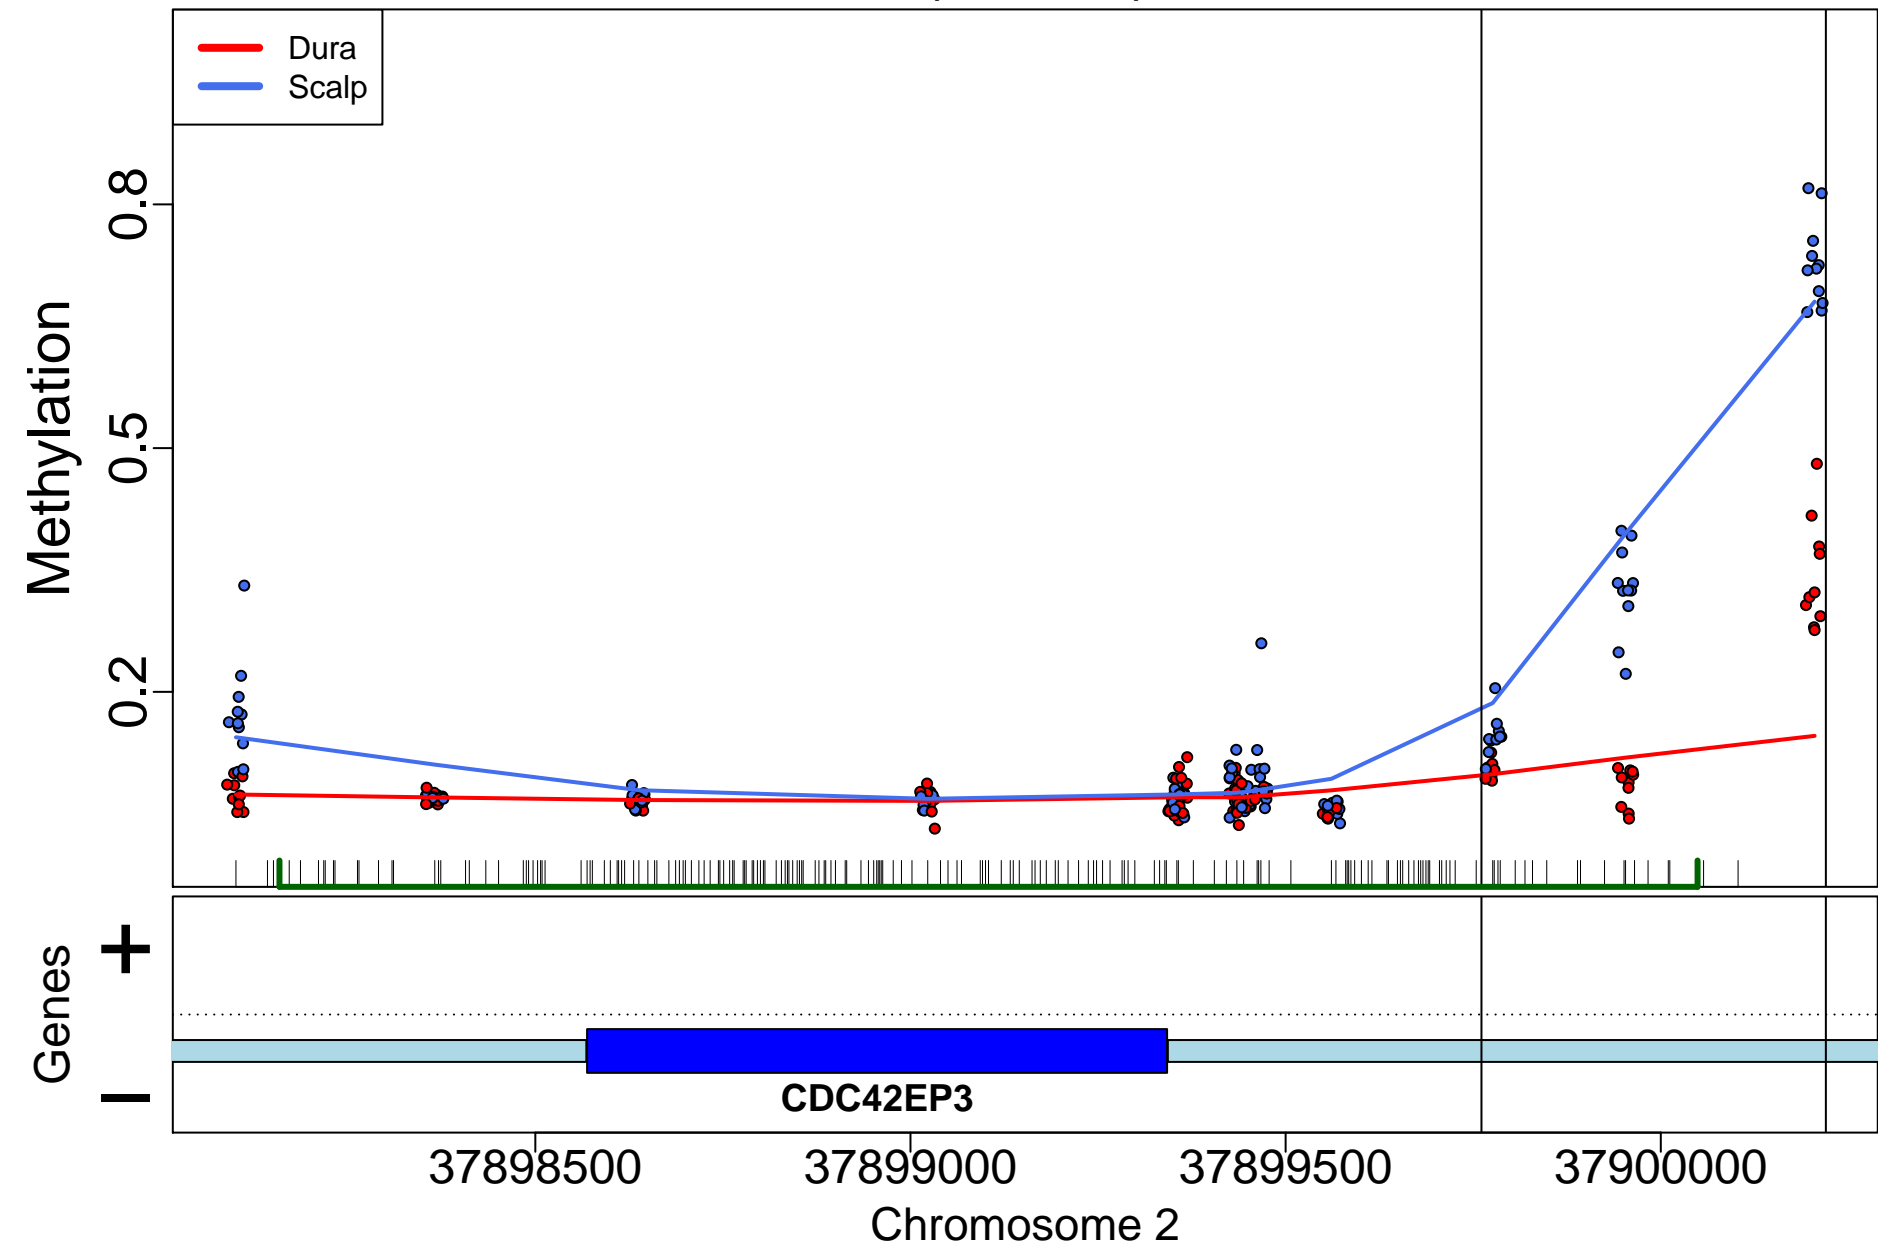

RP5-1086L22.1; 89905bp from tss:downstream

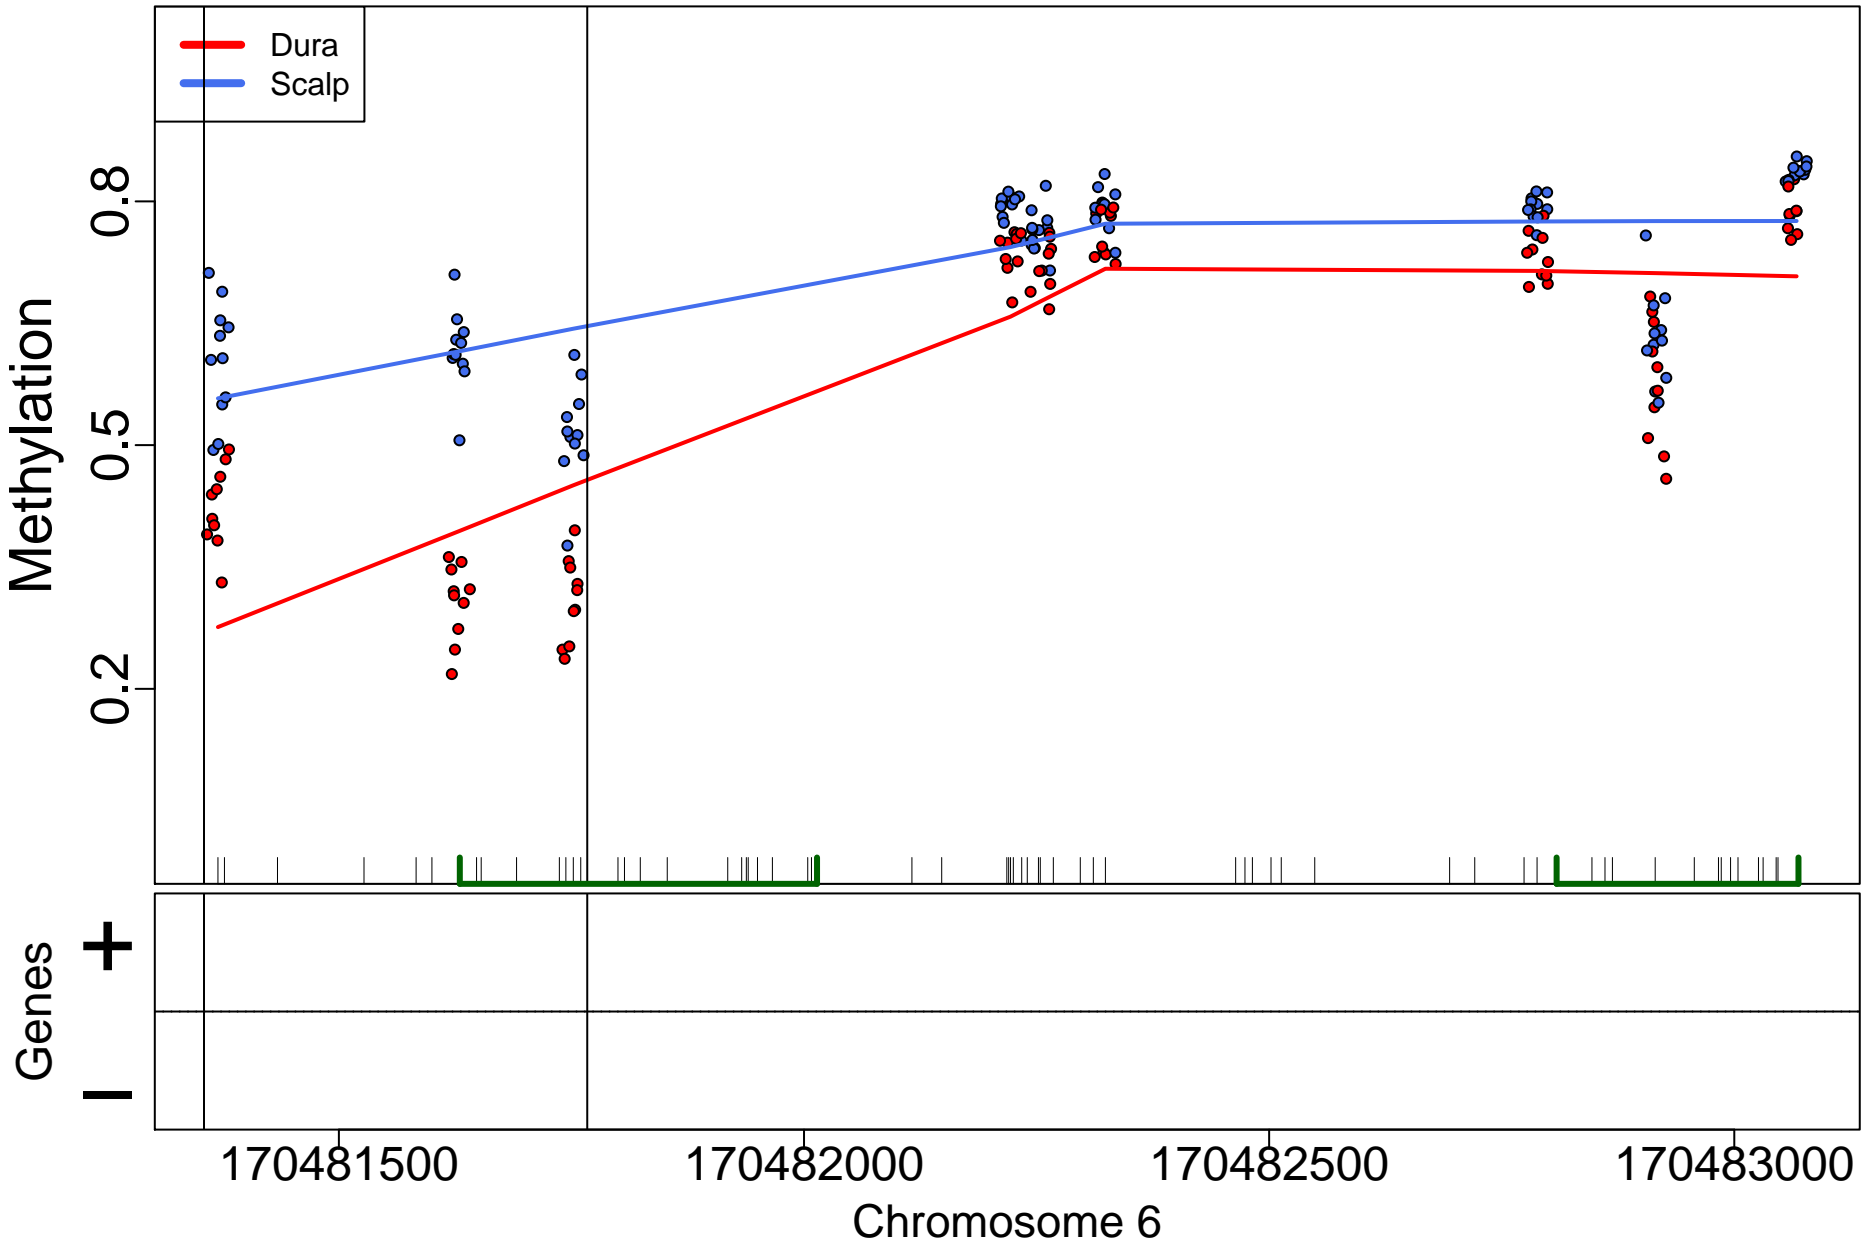

MNX1; 11028bp from tss:inside intron

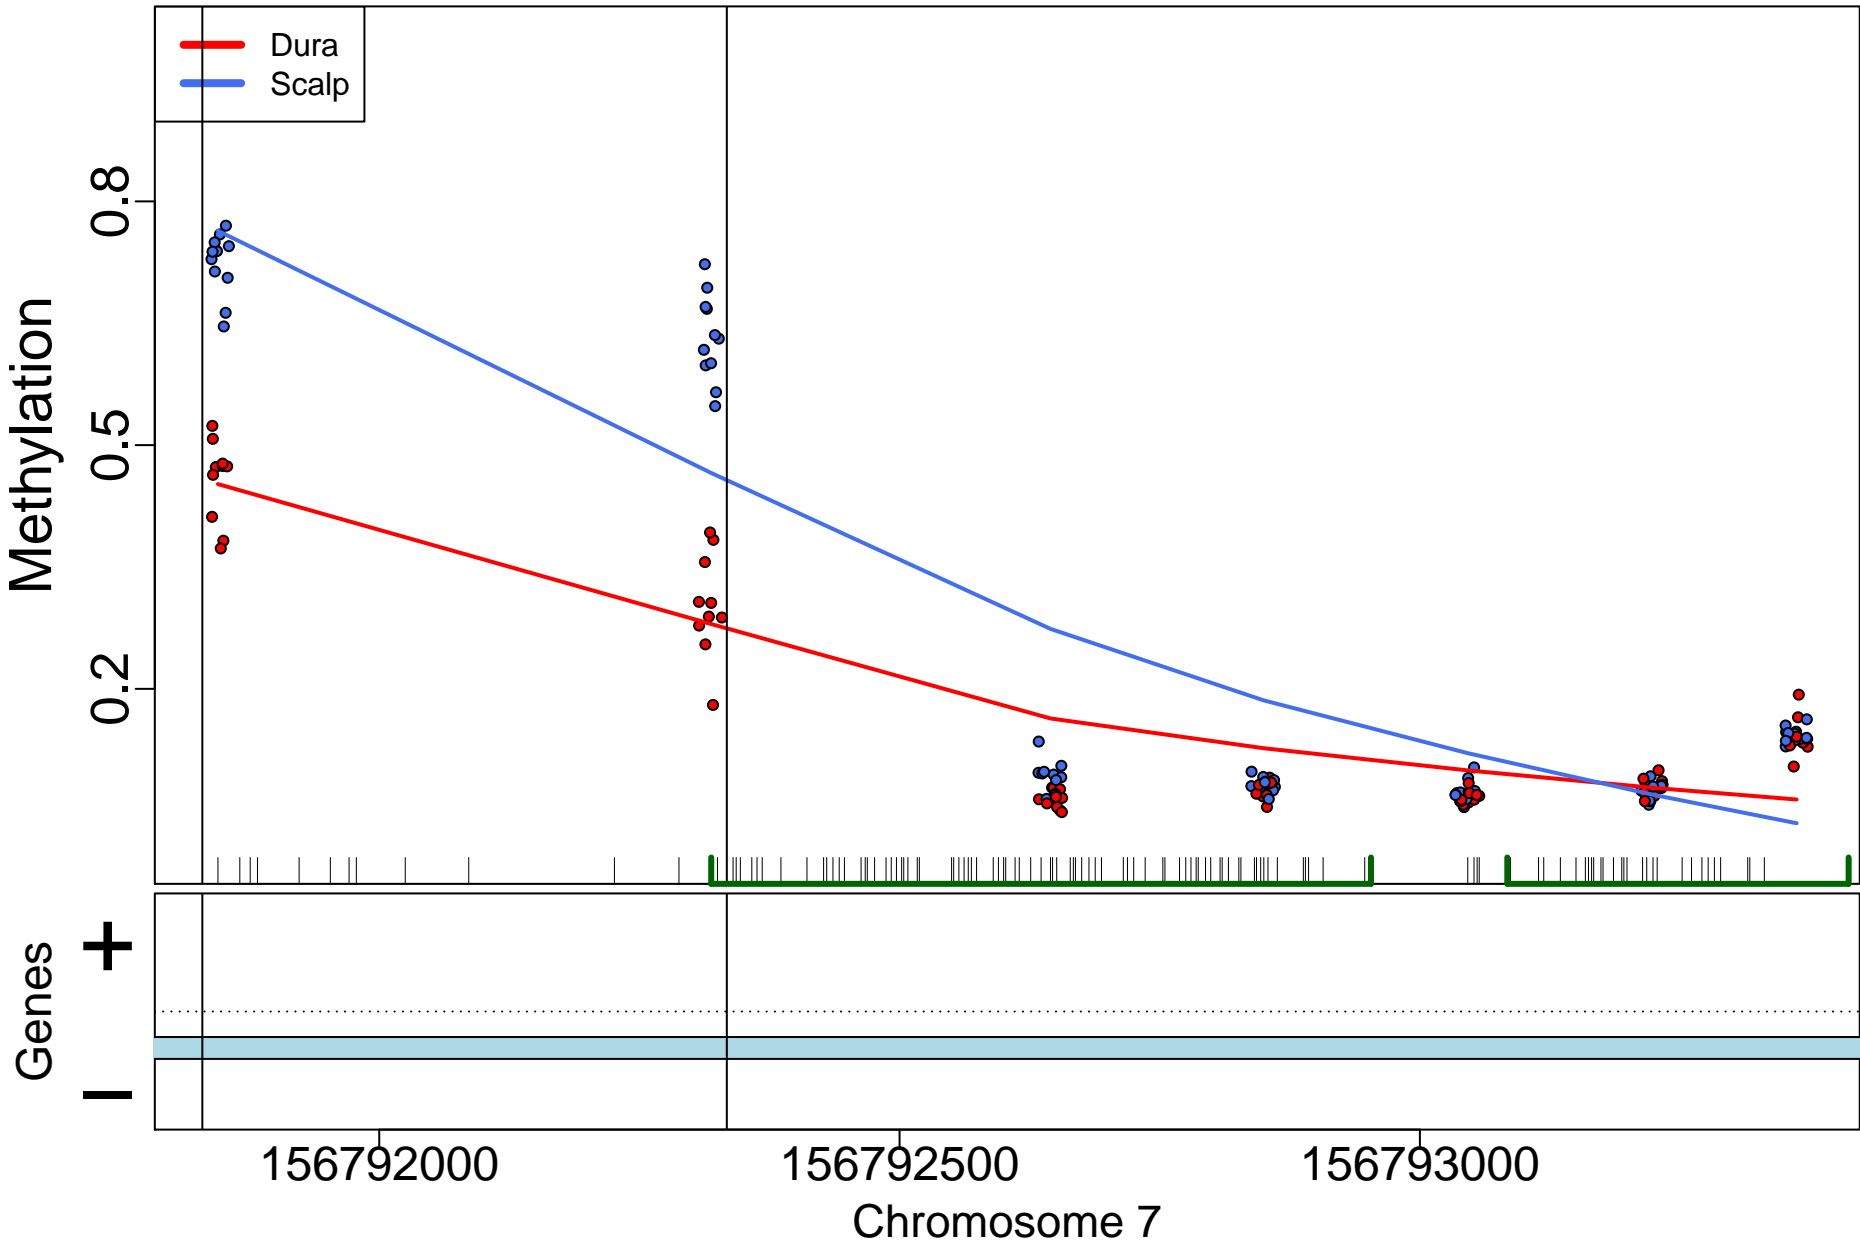



RNF165; 6218bp from tss:inside intron

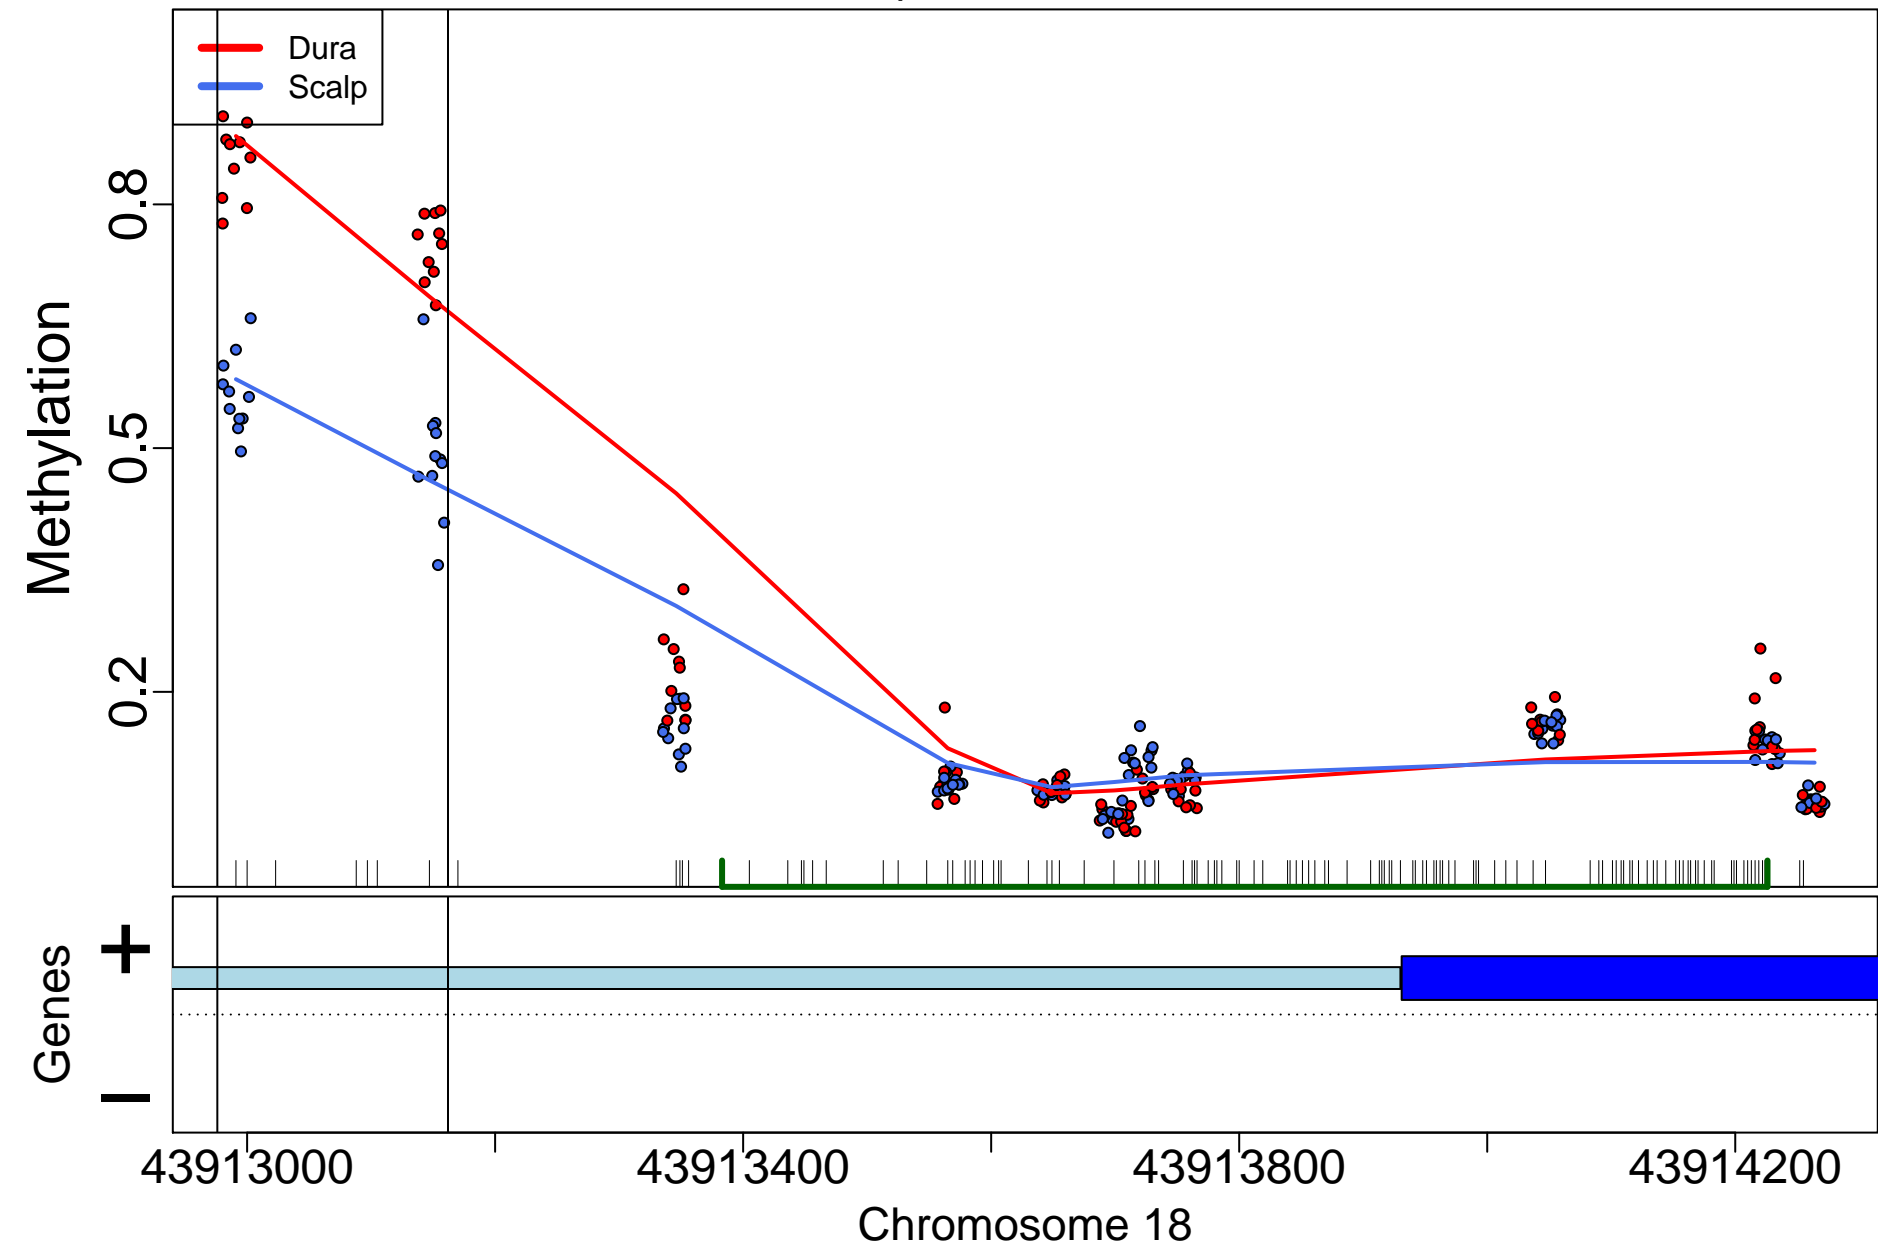

LINC00982; 3352bp from tss:overlaps 3'

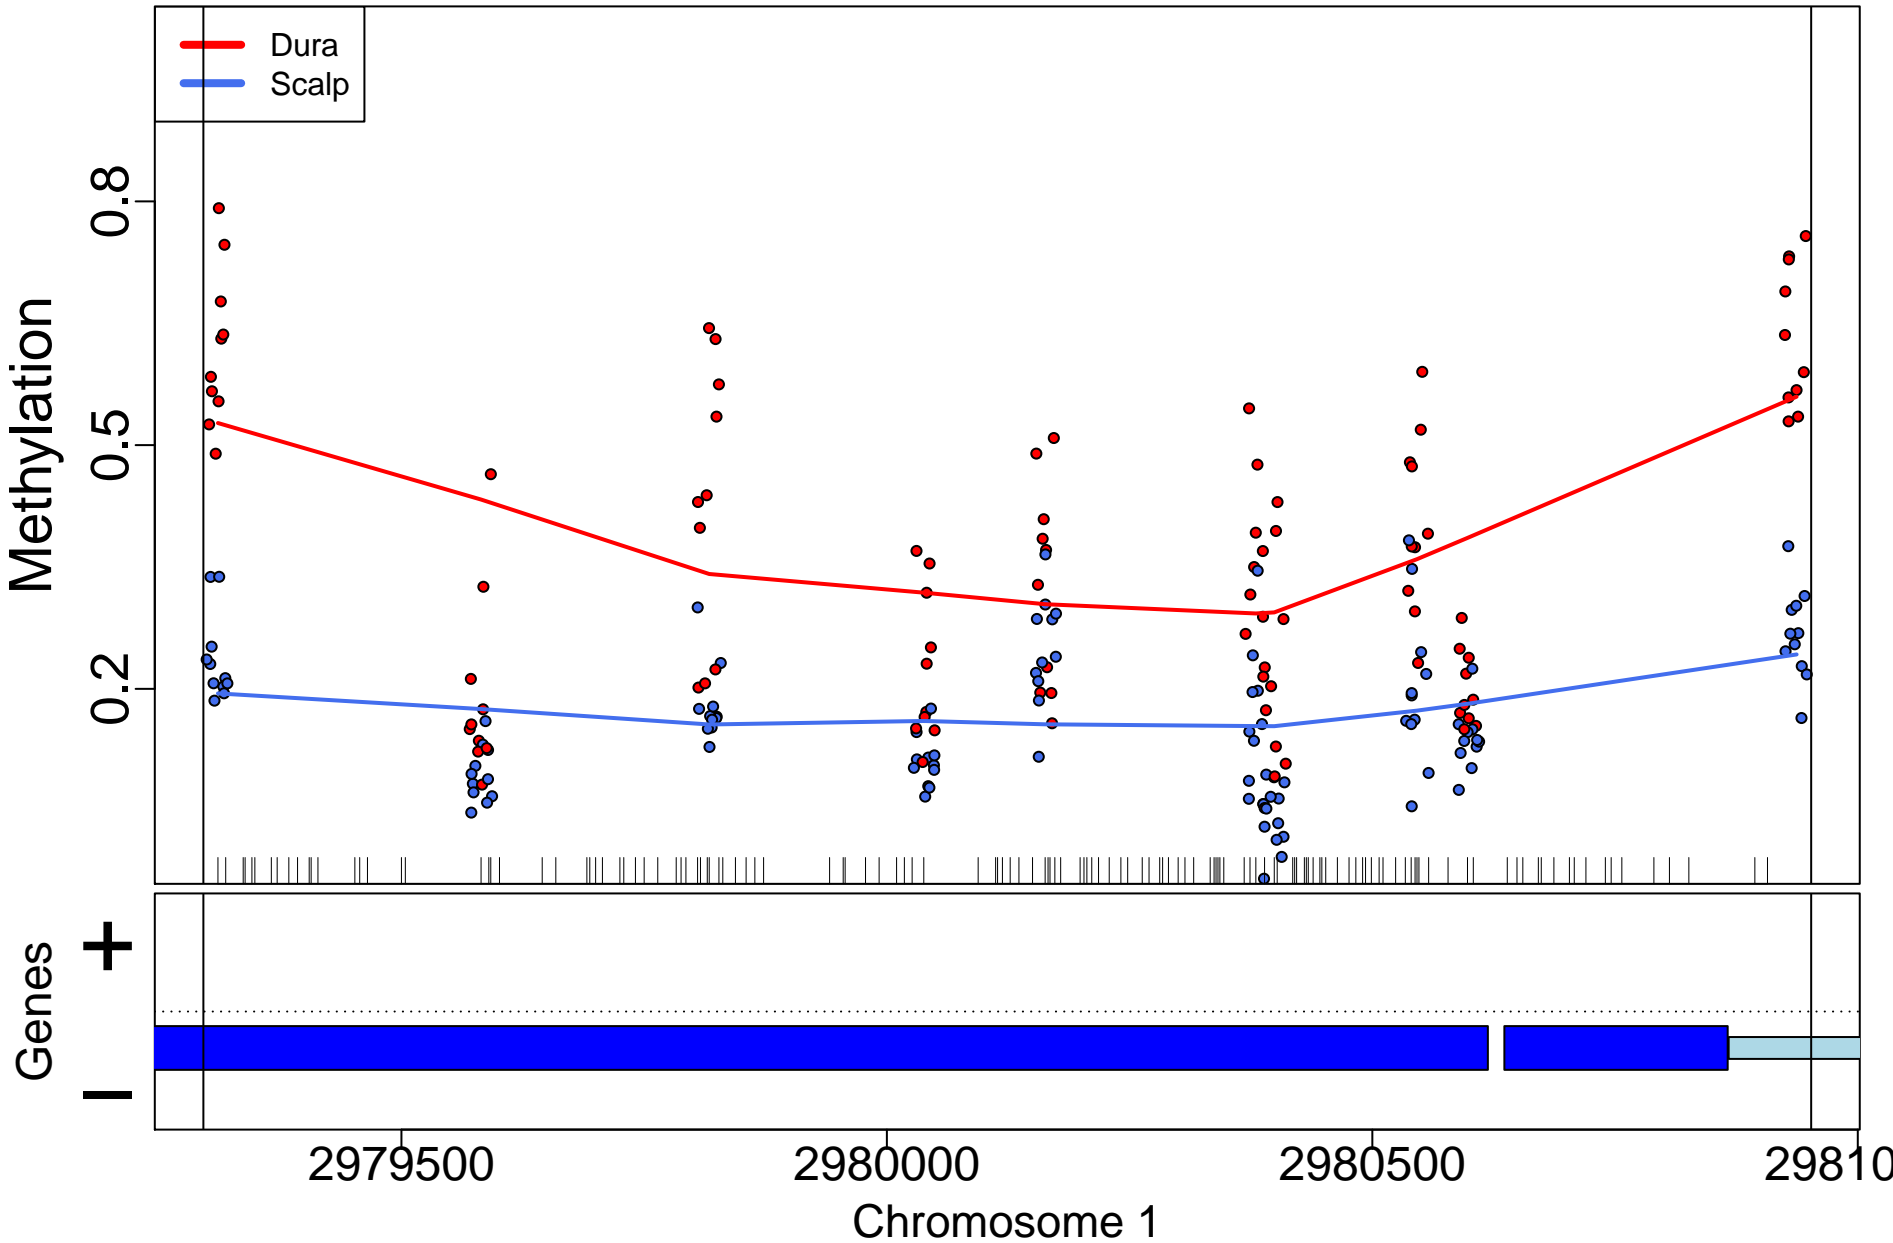

TRIM10; 5250bp from tss:inside intron

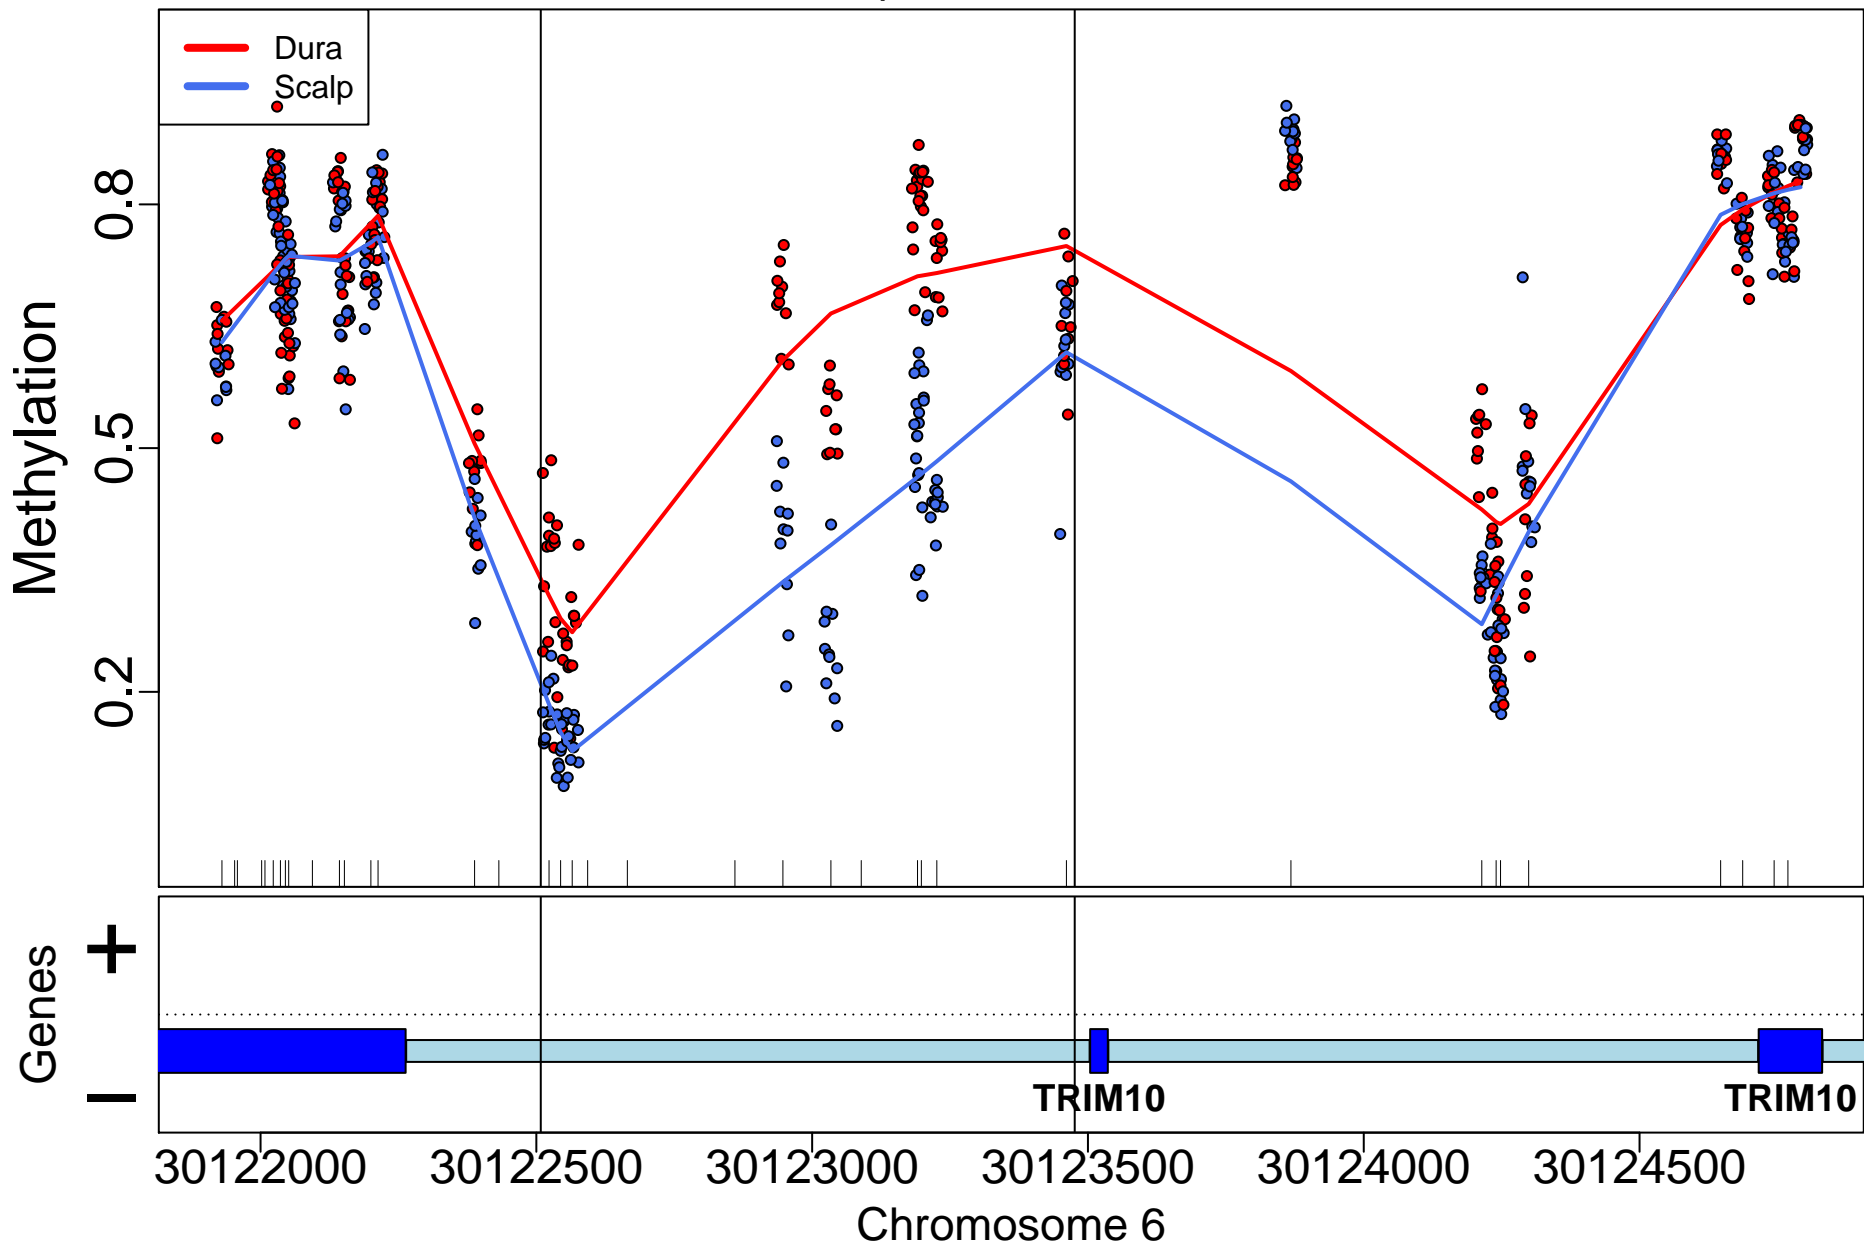

UPP1; 946bp from tss:covers exon(s)

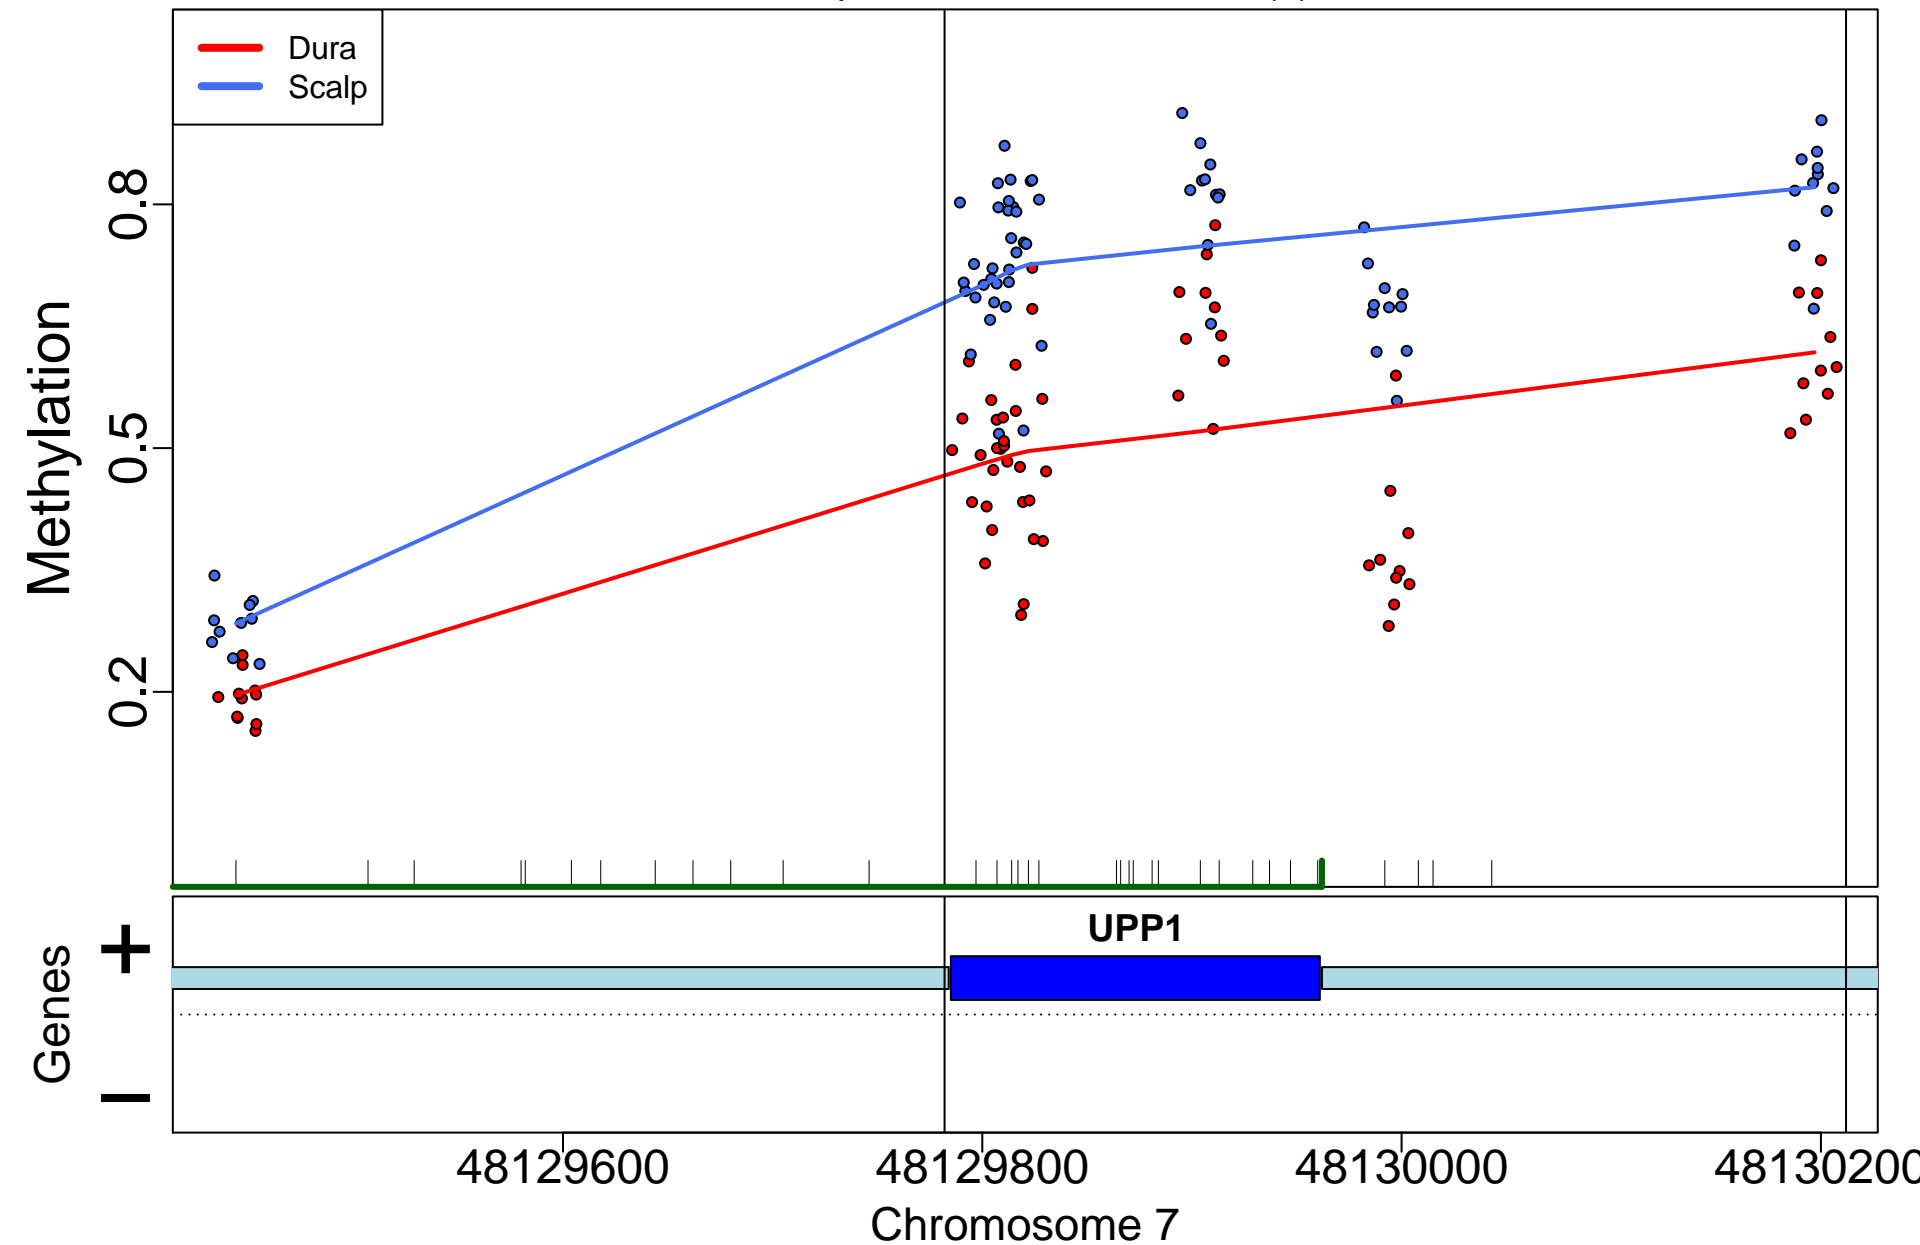

# AHCYL2; 166bp from tss:overlaps exon downstream

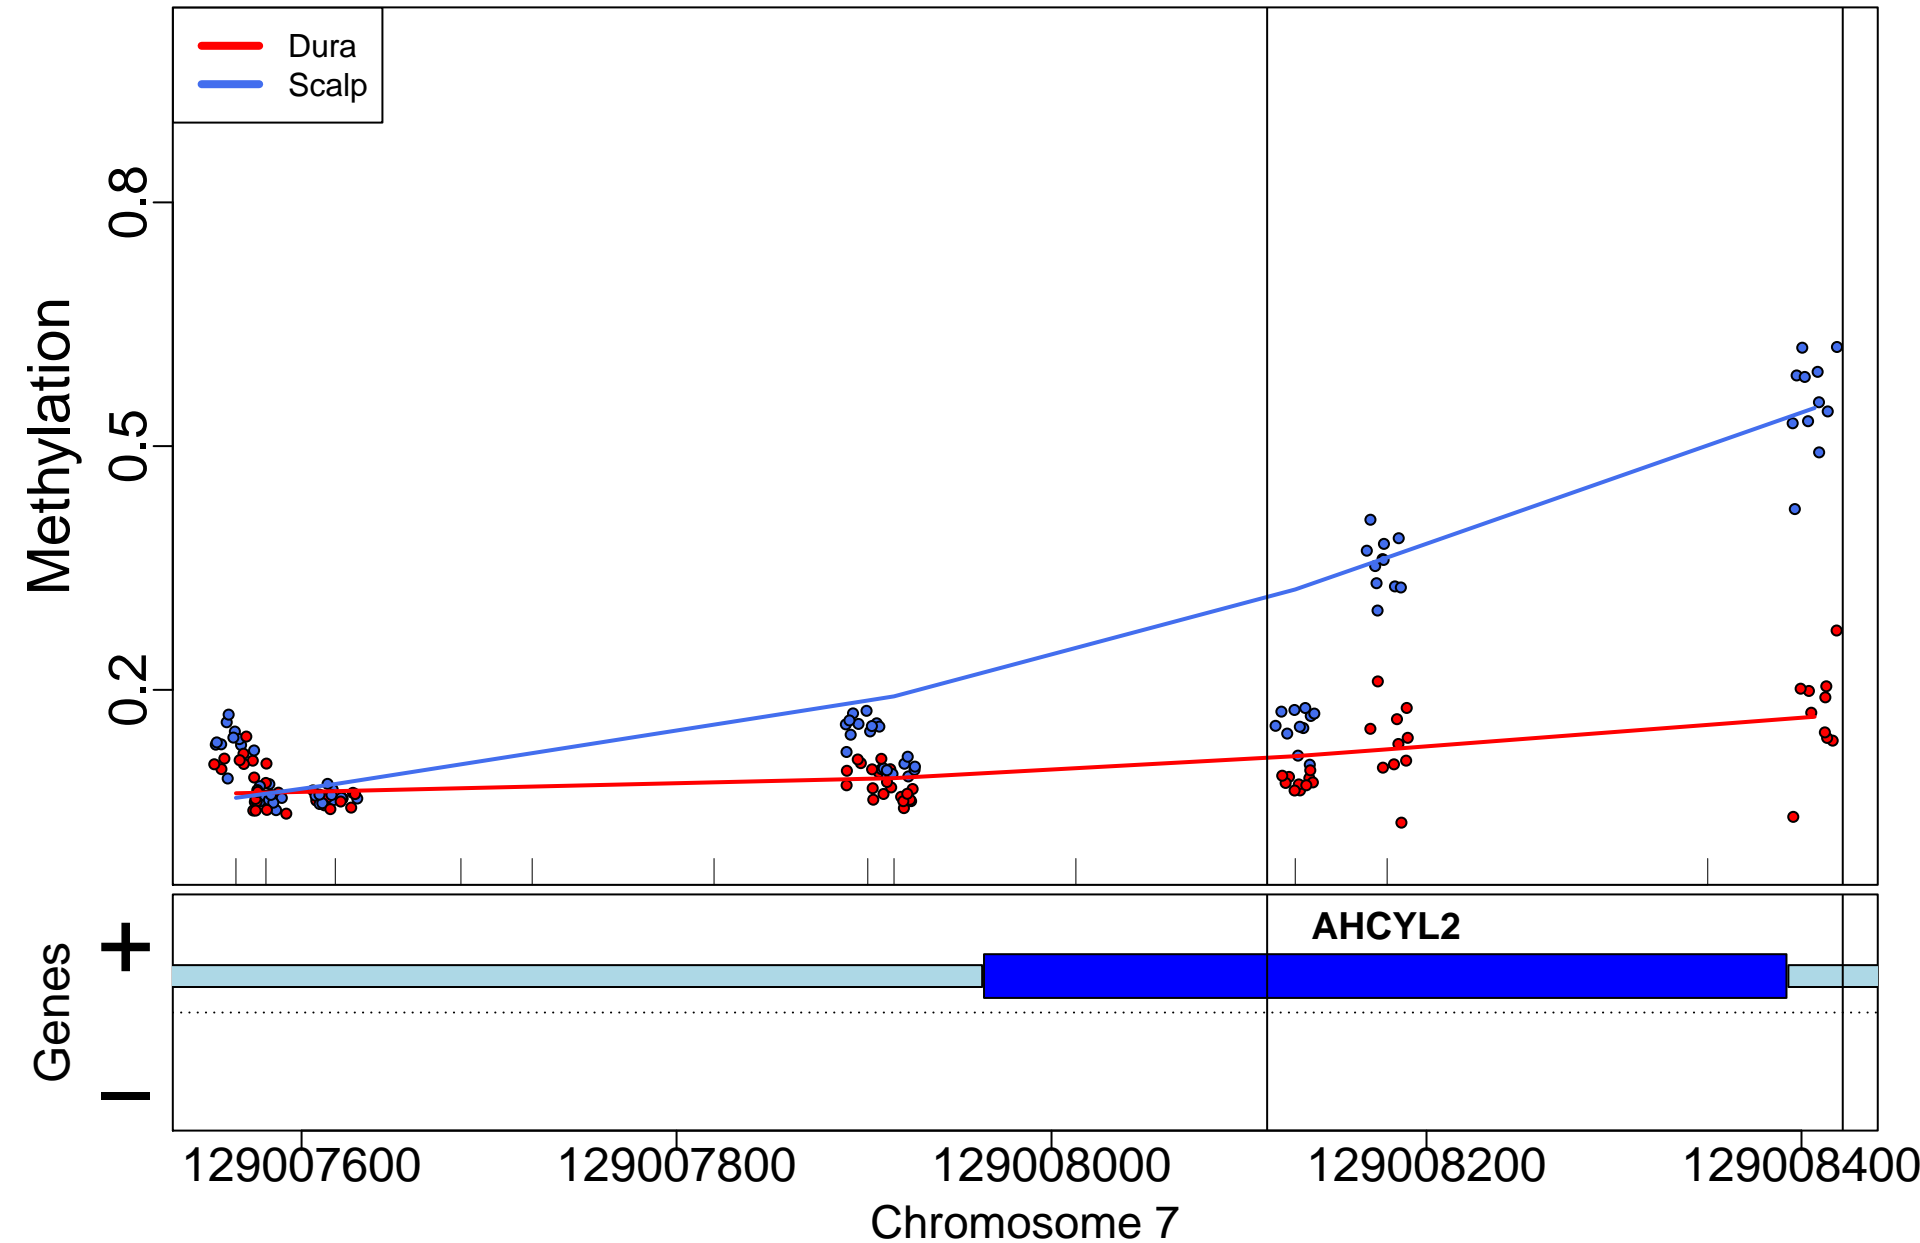

# SLC35D3; 1872bp from tss:promoter

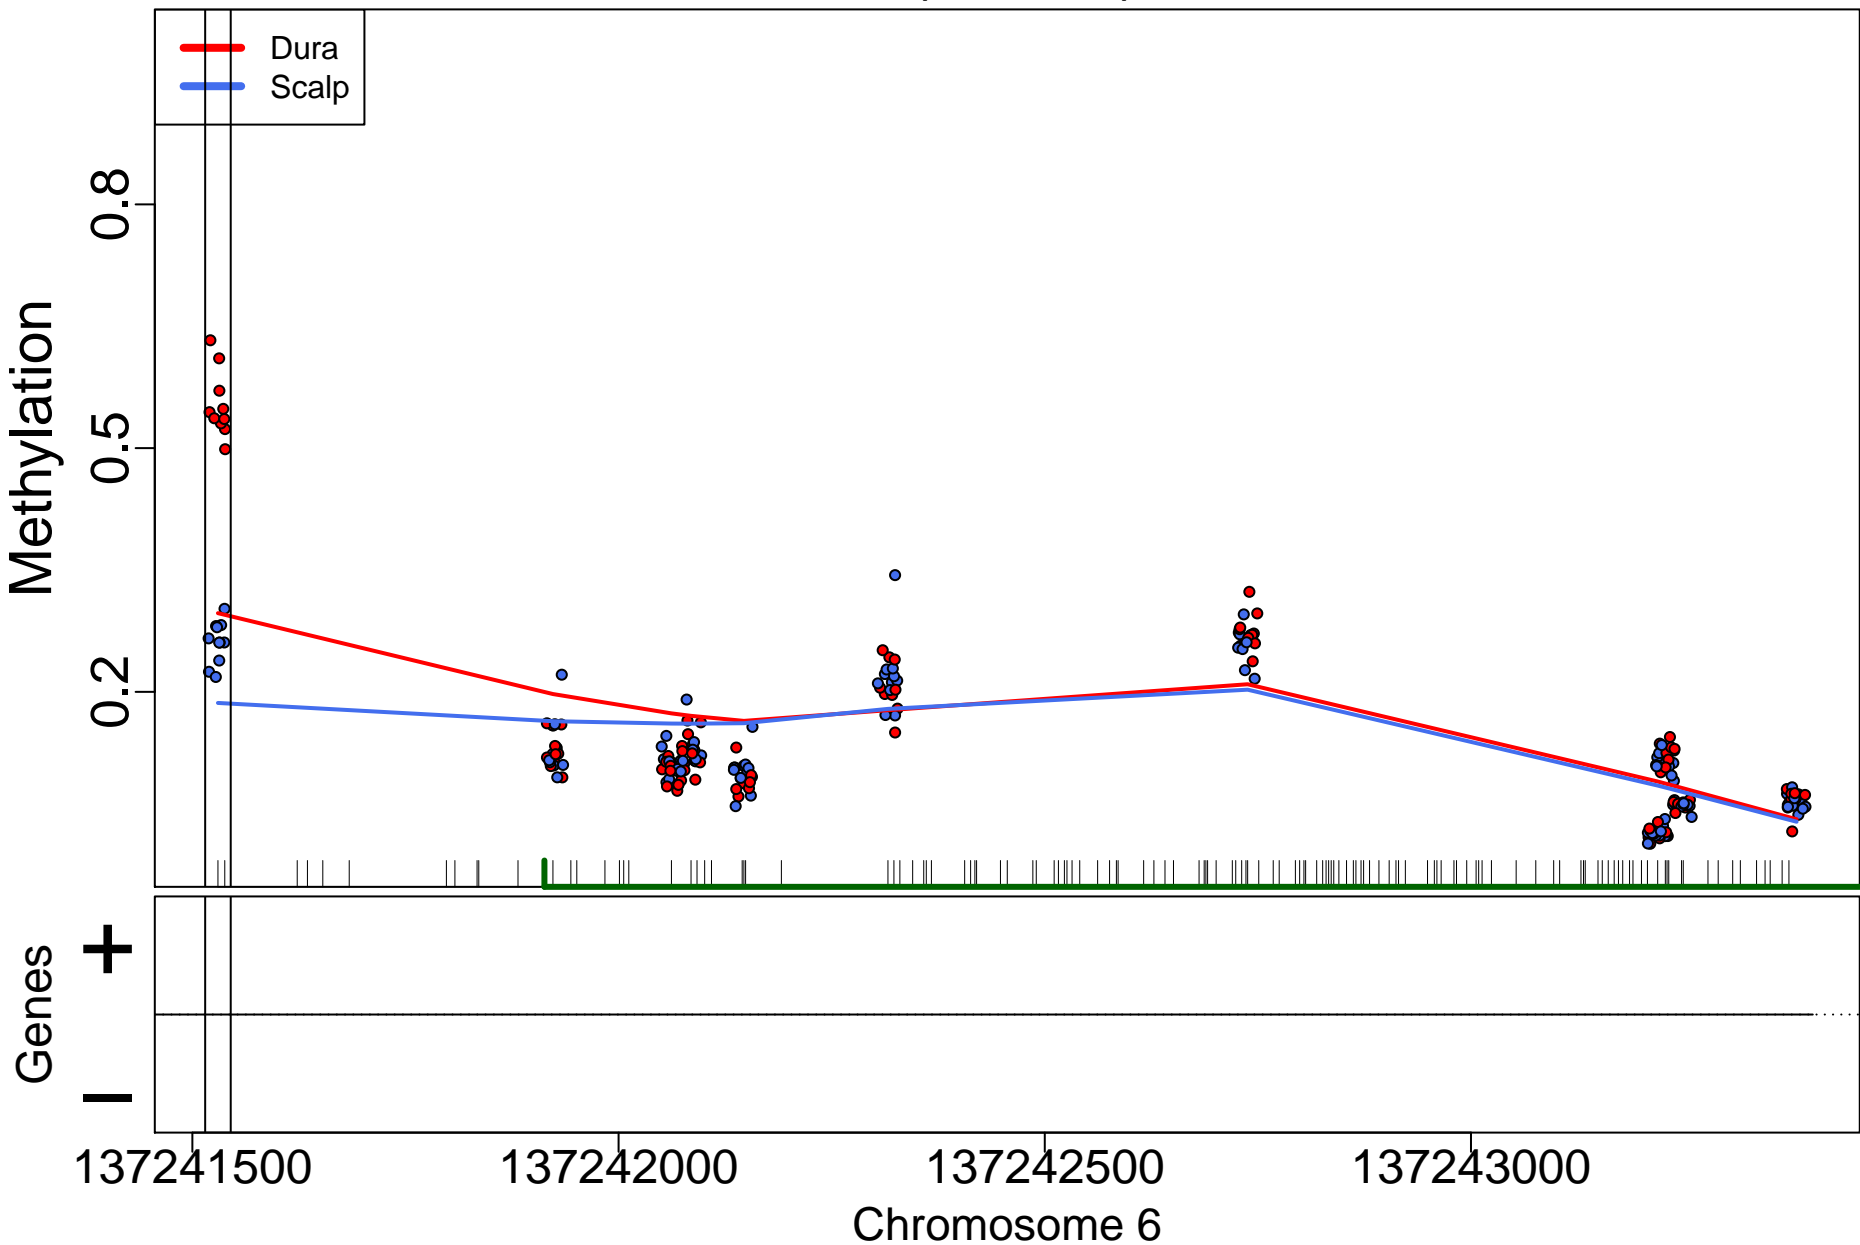

FOXL2; 6961bp from tss:downstream

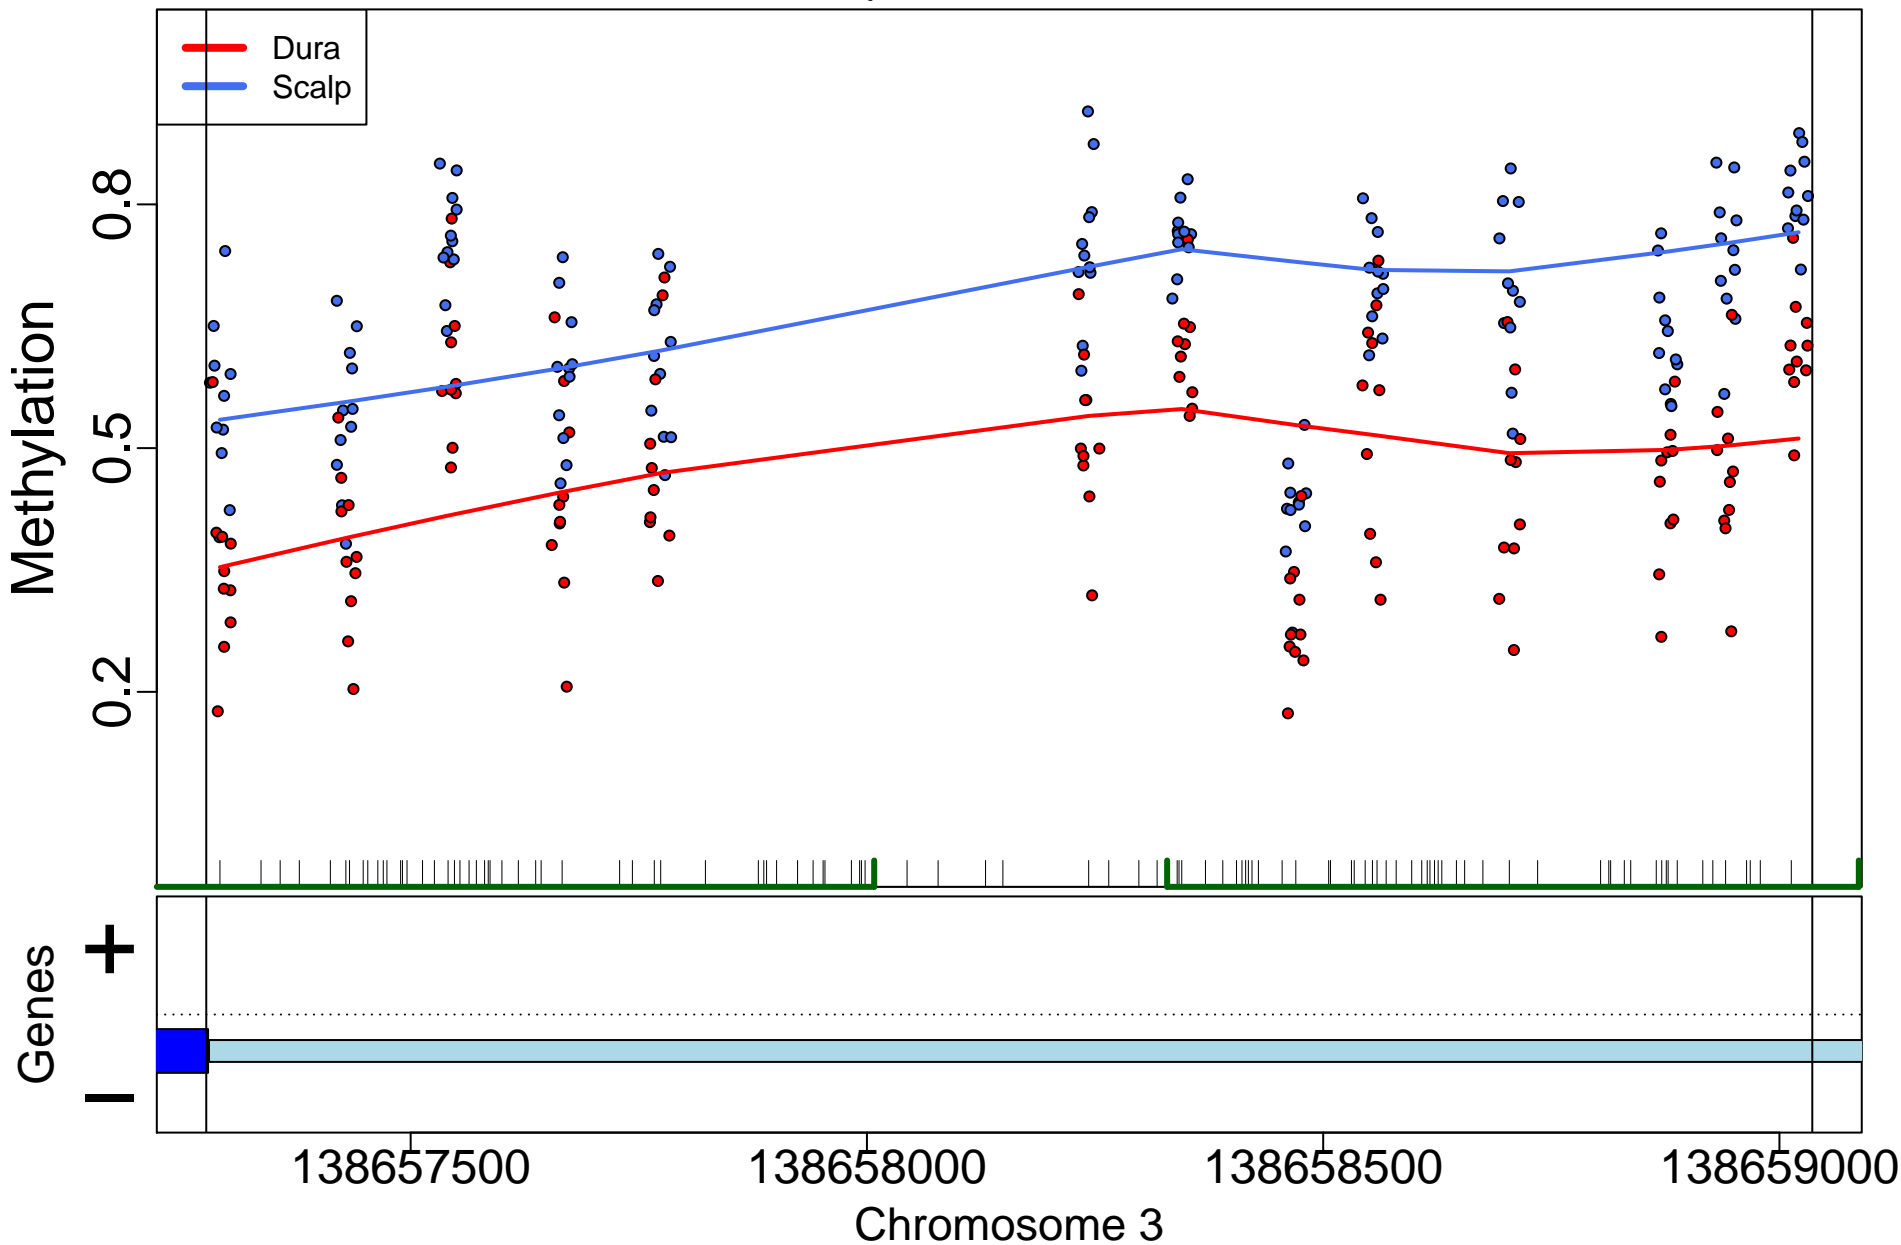

SLC38A2; 644bp from tss:promoter

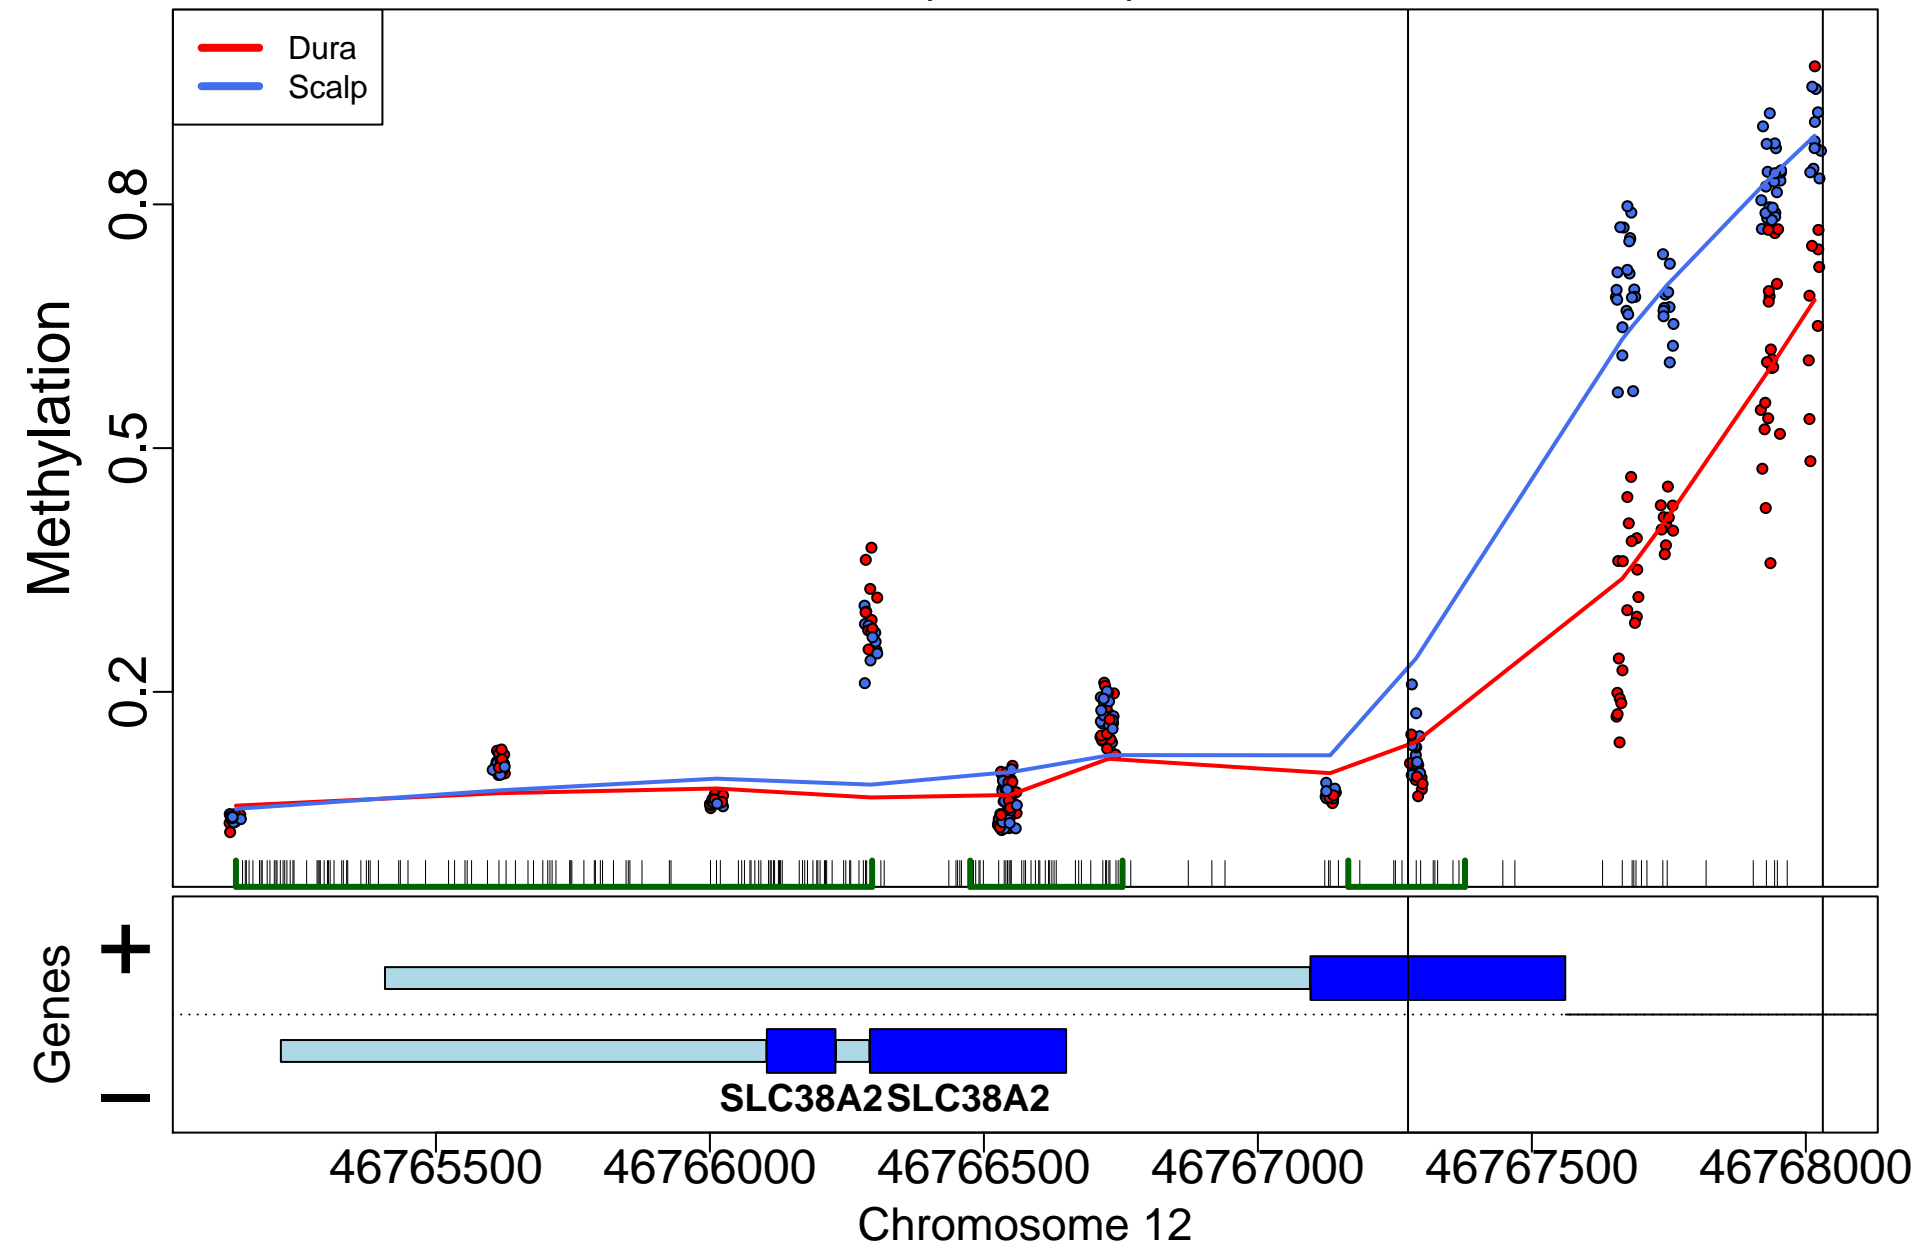



ERICH1-AS1; 0bp from tss:NA

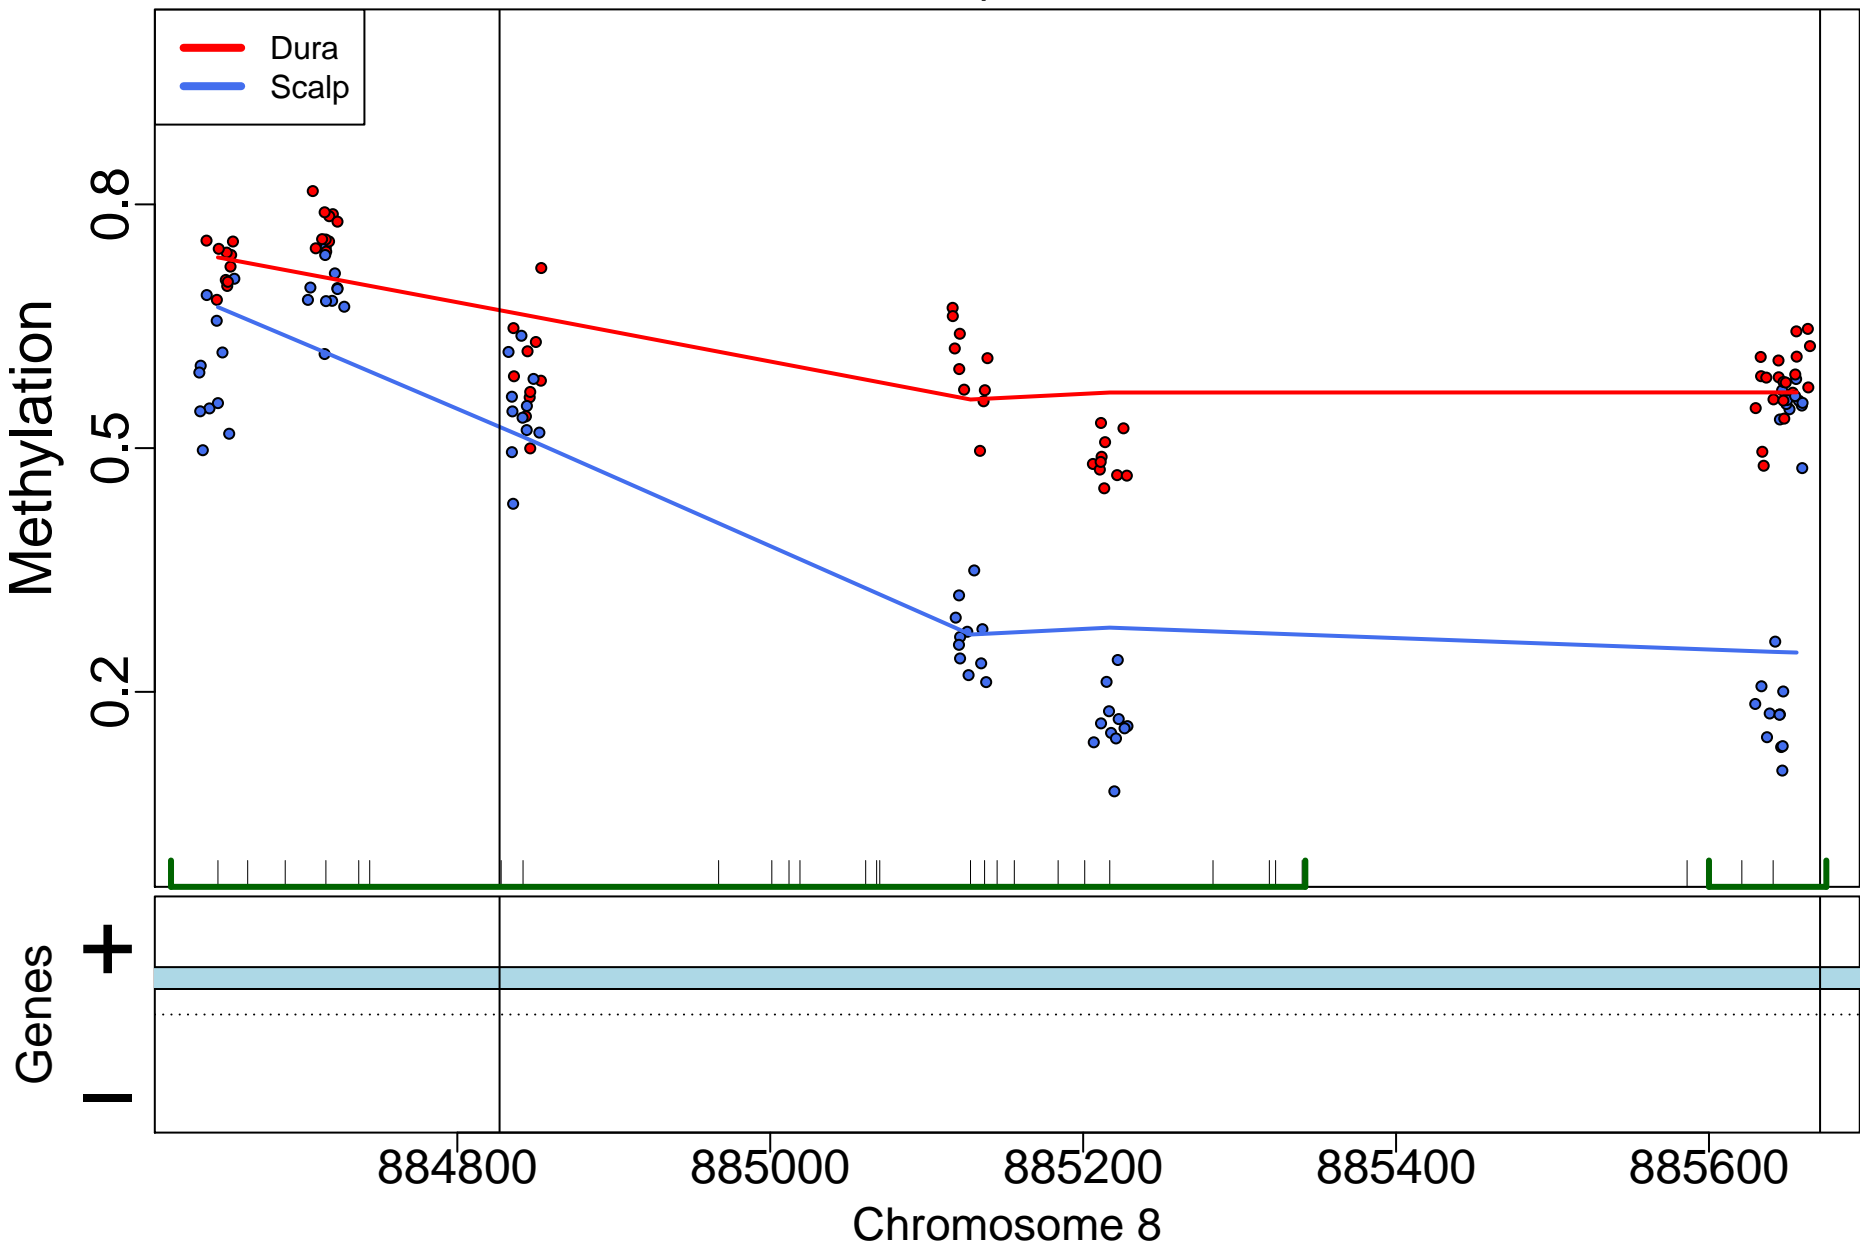

# SGK1; 141441bp from tss:inside intron

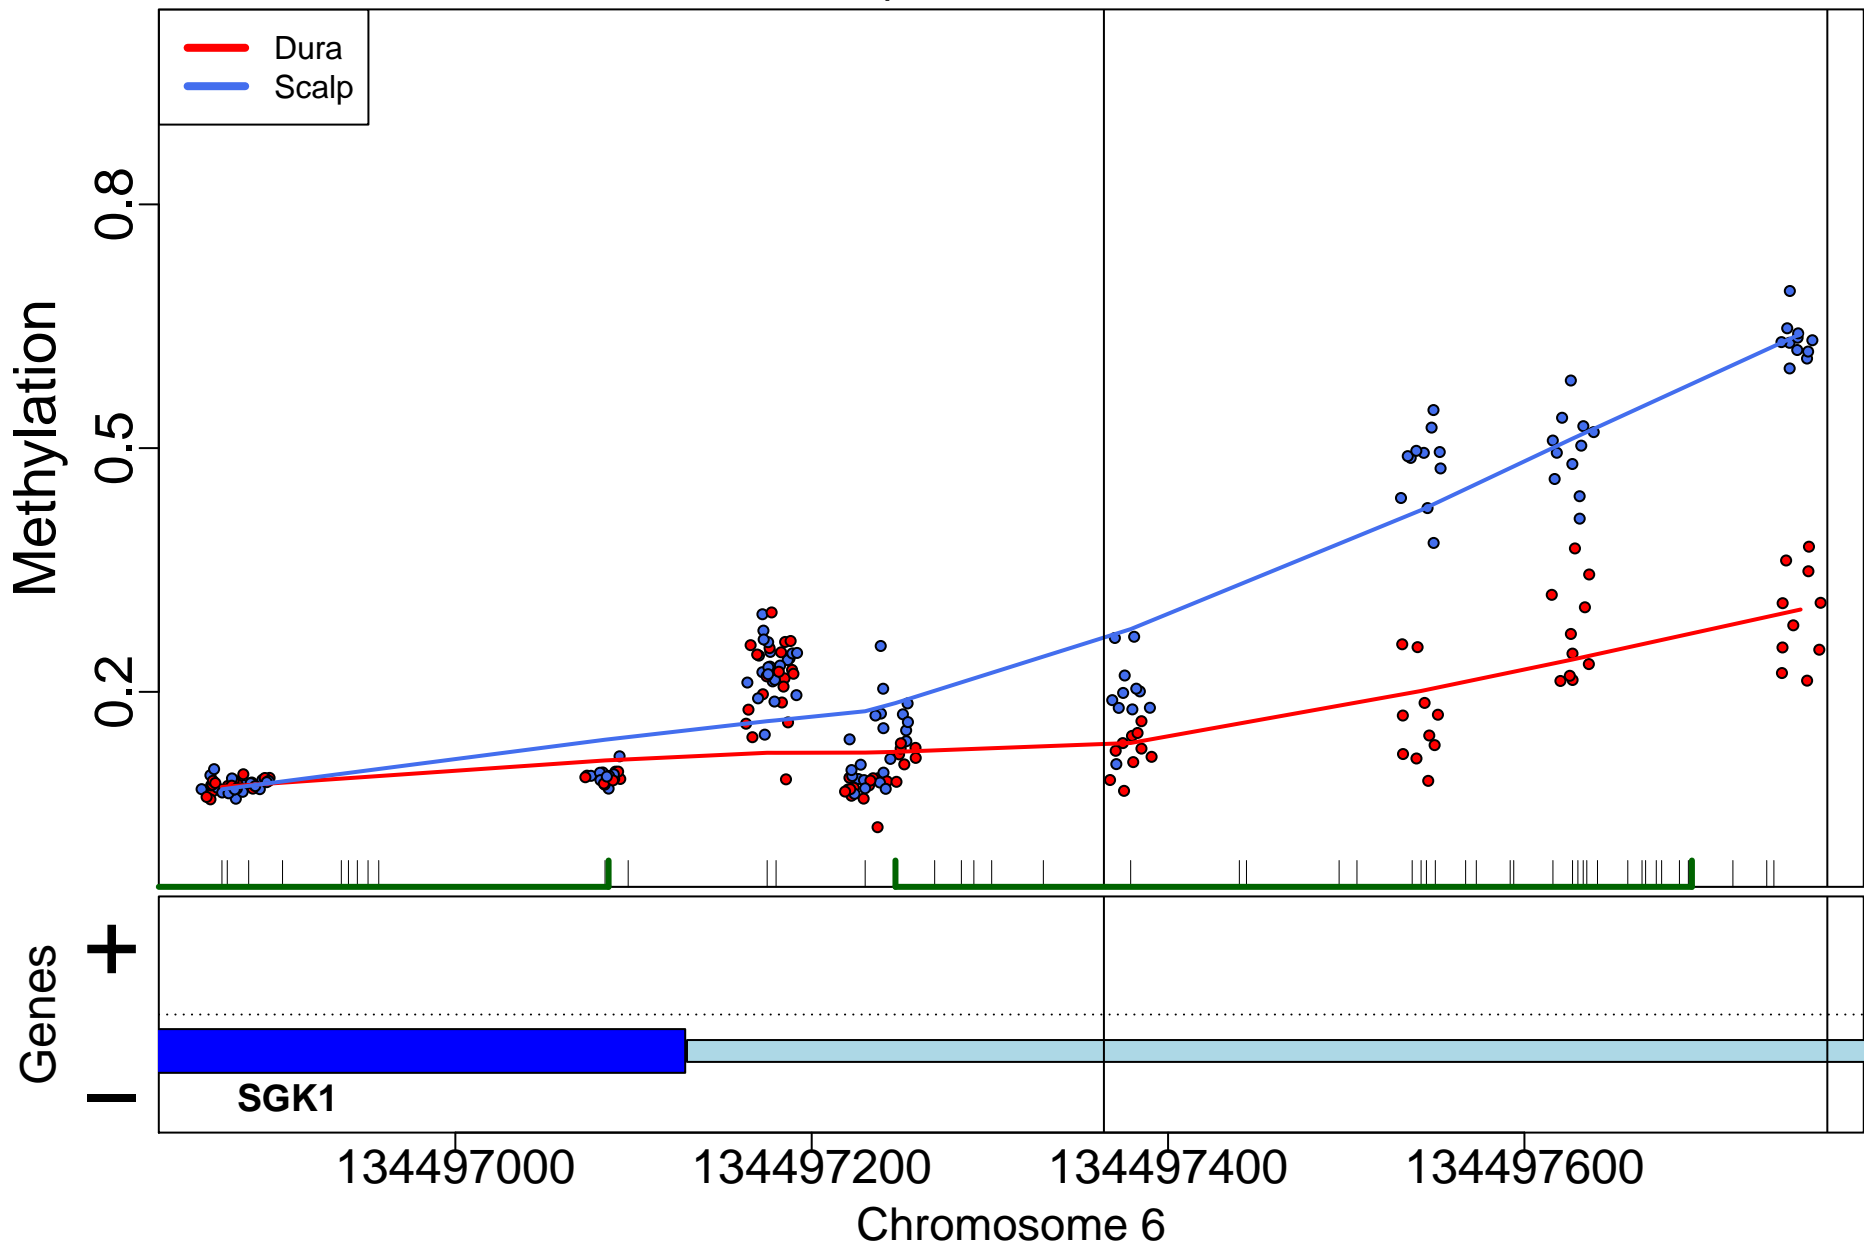

RASA3; 29484bp from tss:upstream

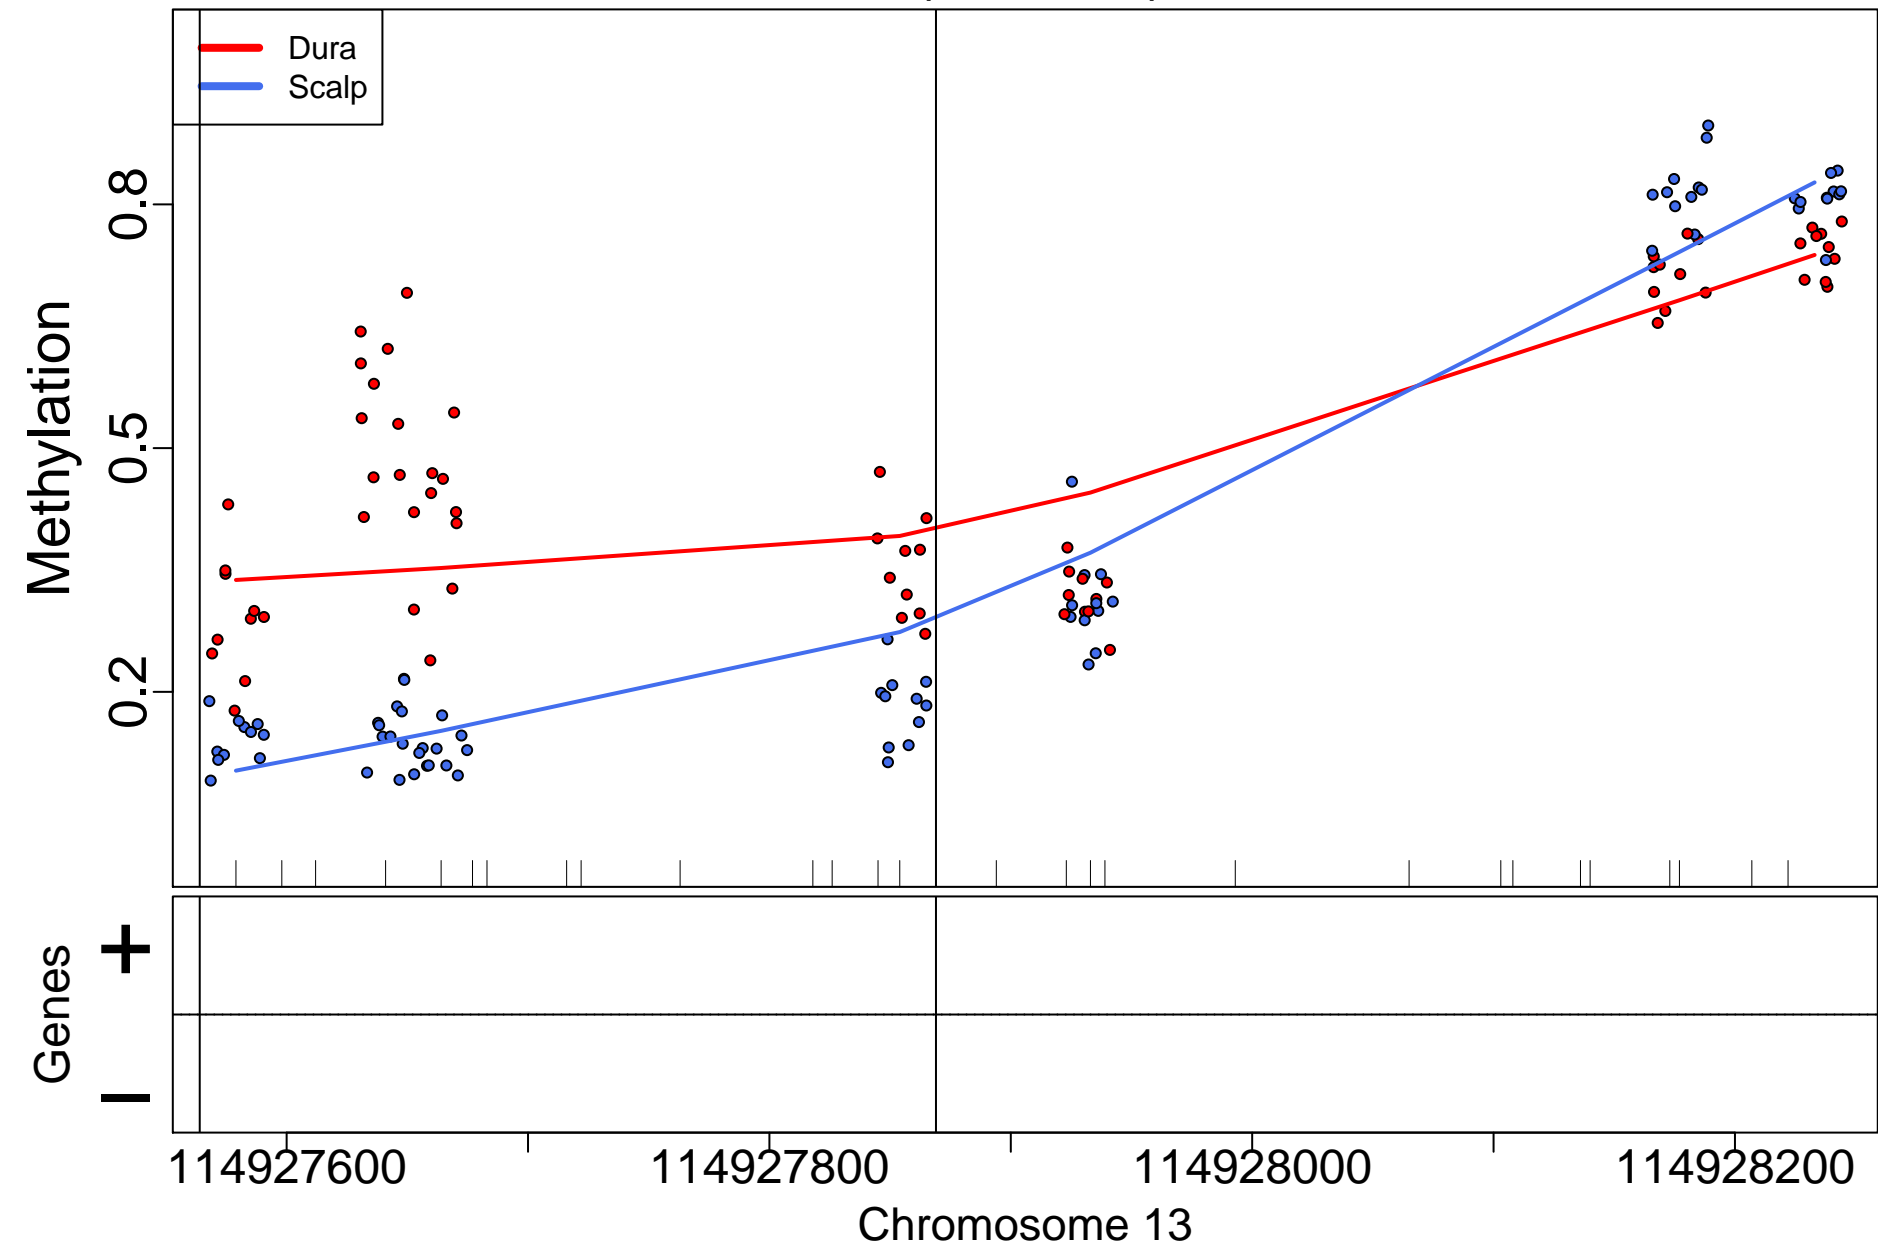

## SH2D4A; 649bp from tss:promoter

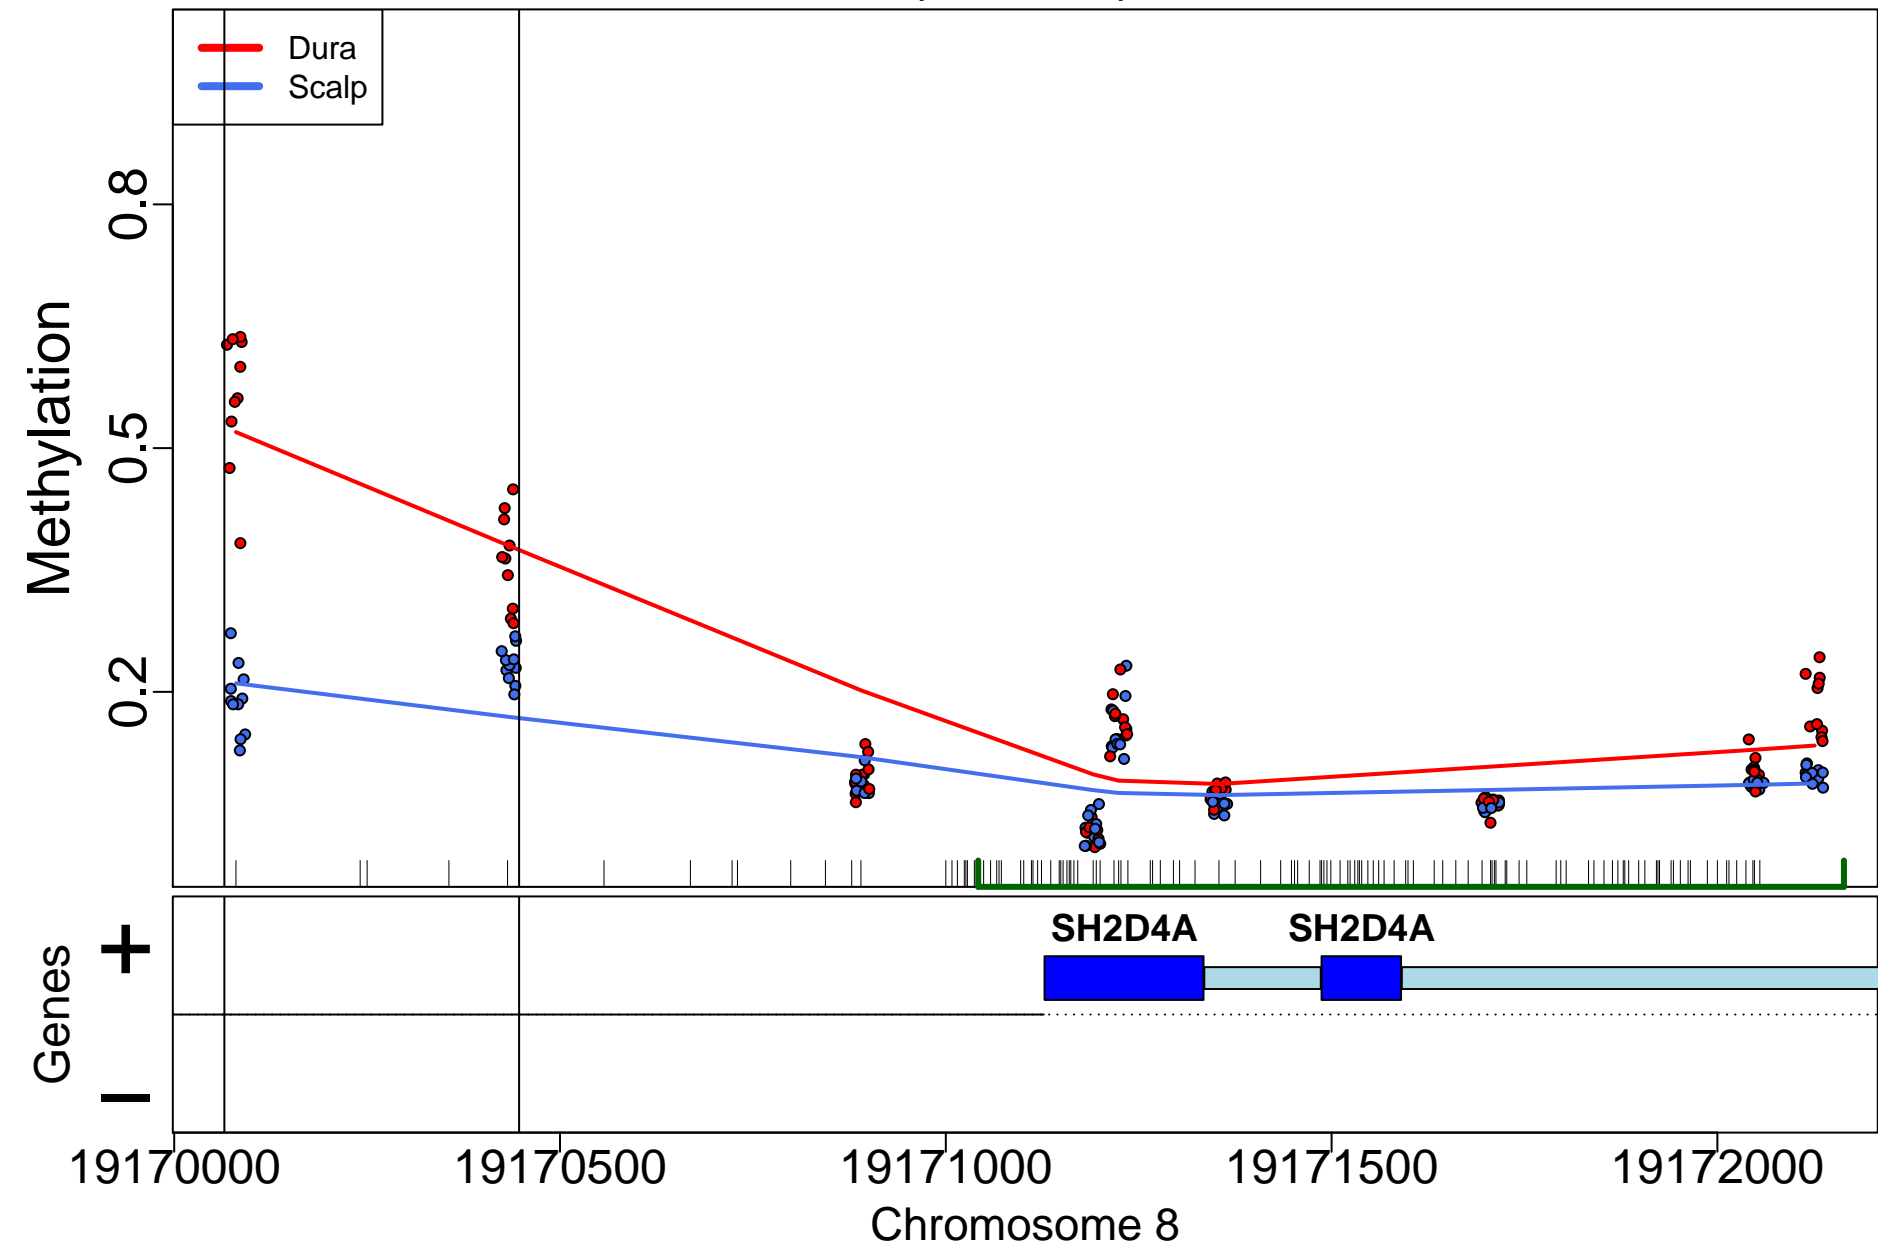

MIR4309; 0bp from tss:NA

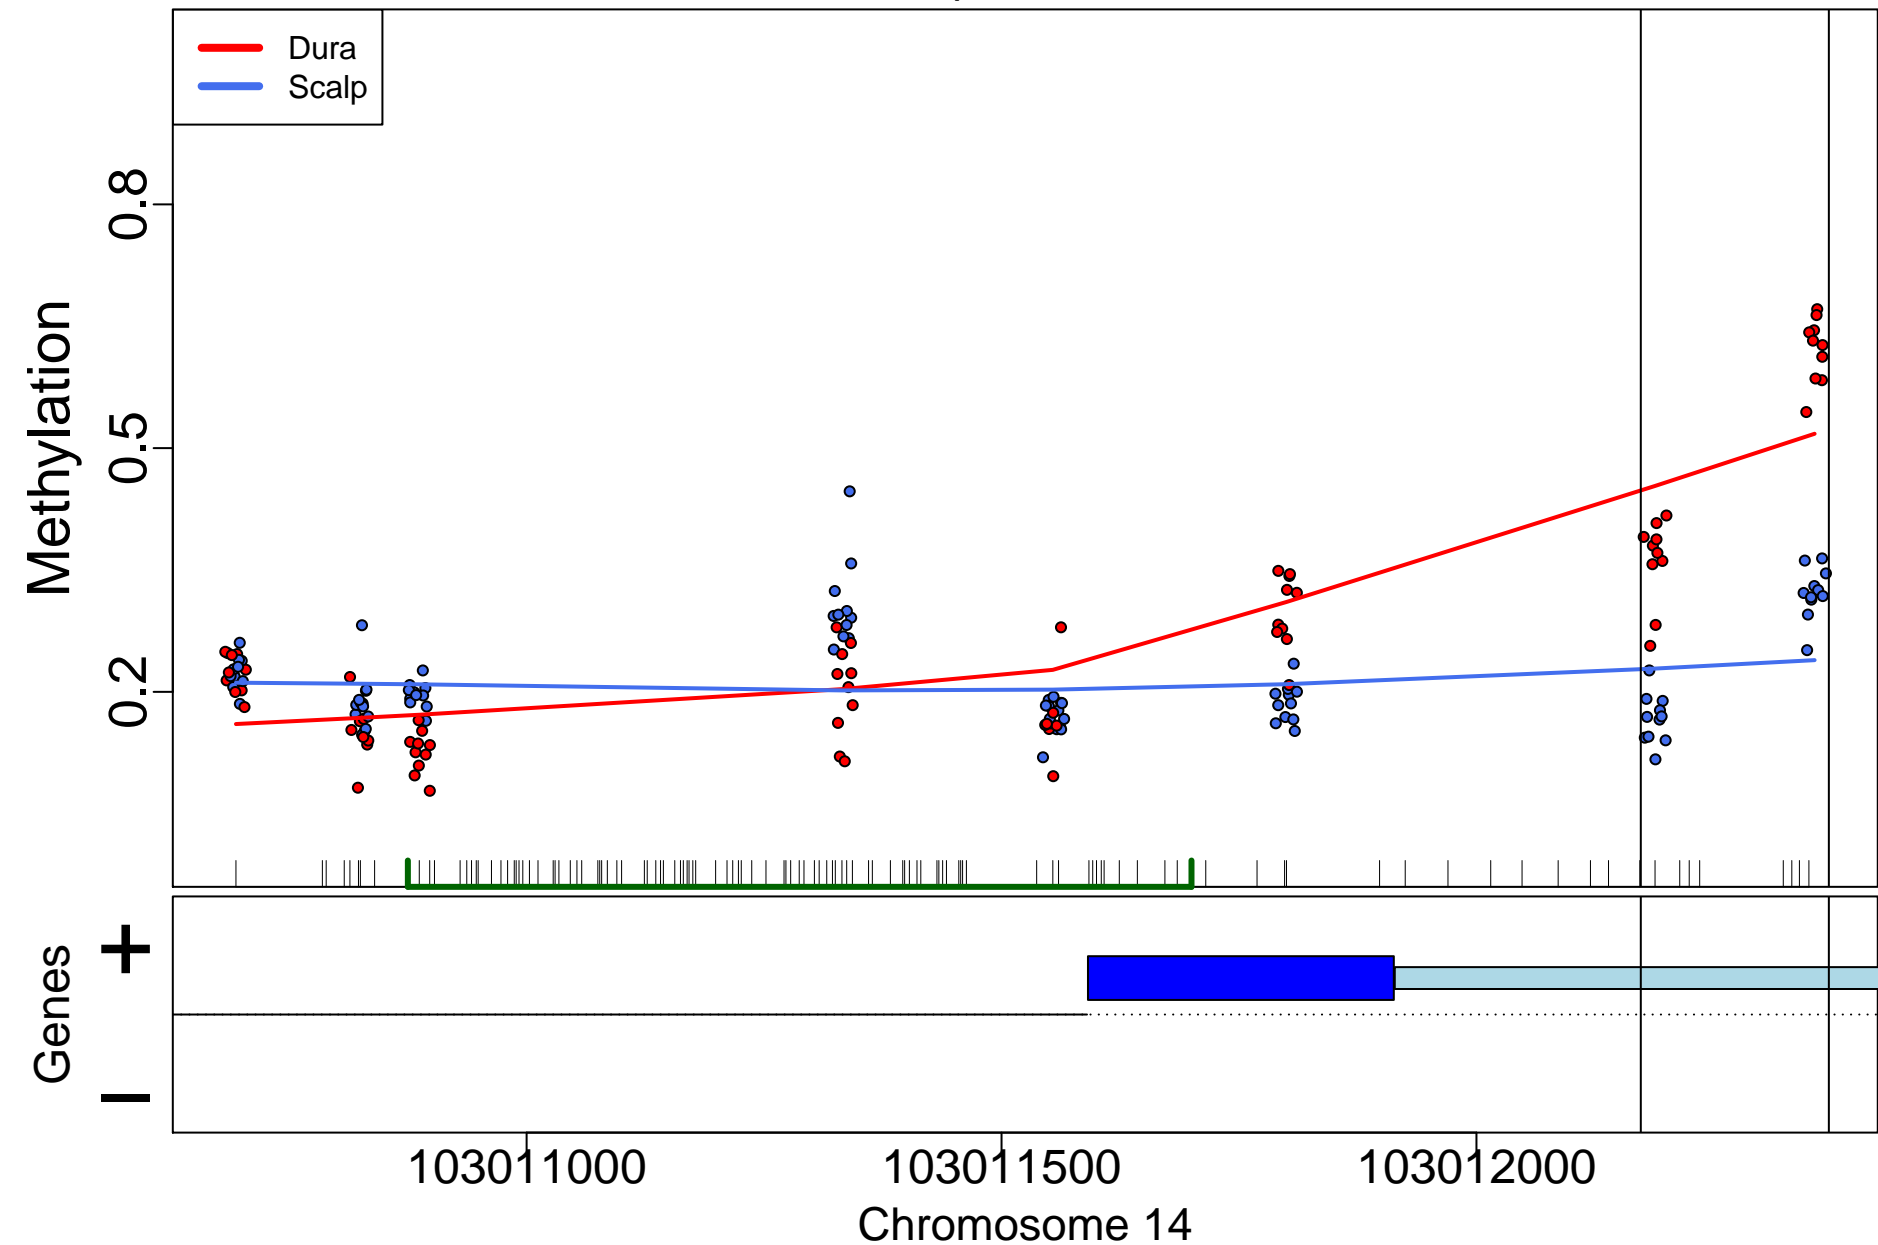

C5orf38; 5195bp from tss:downstream

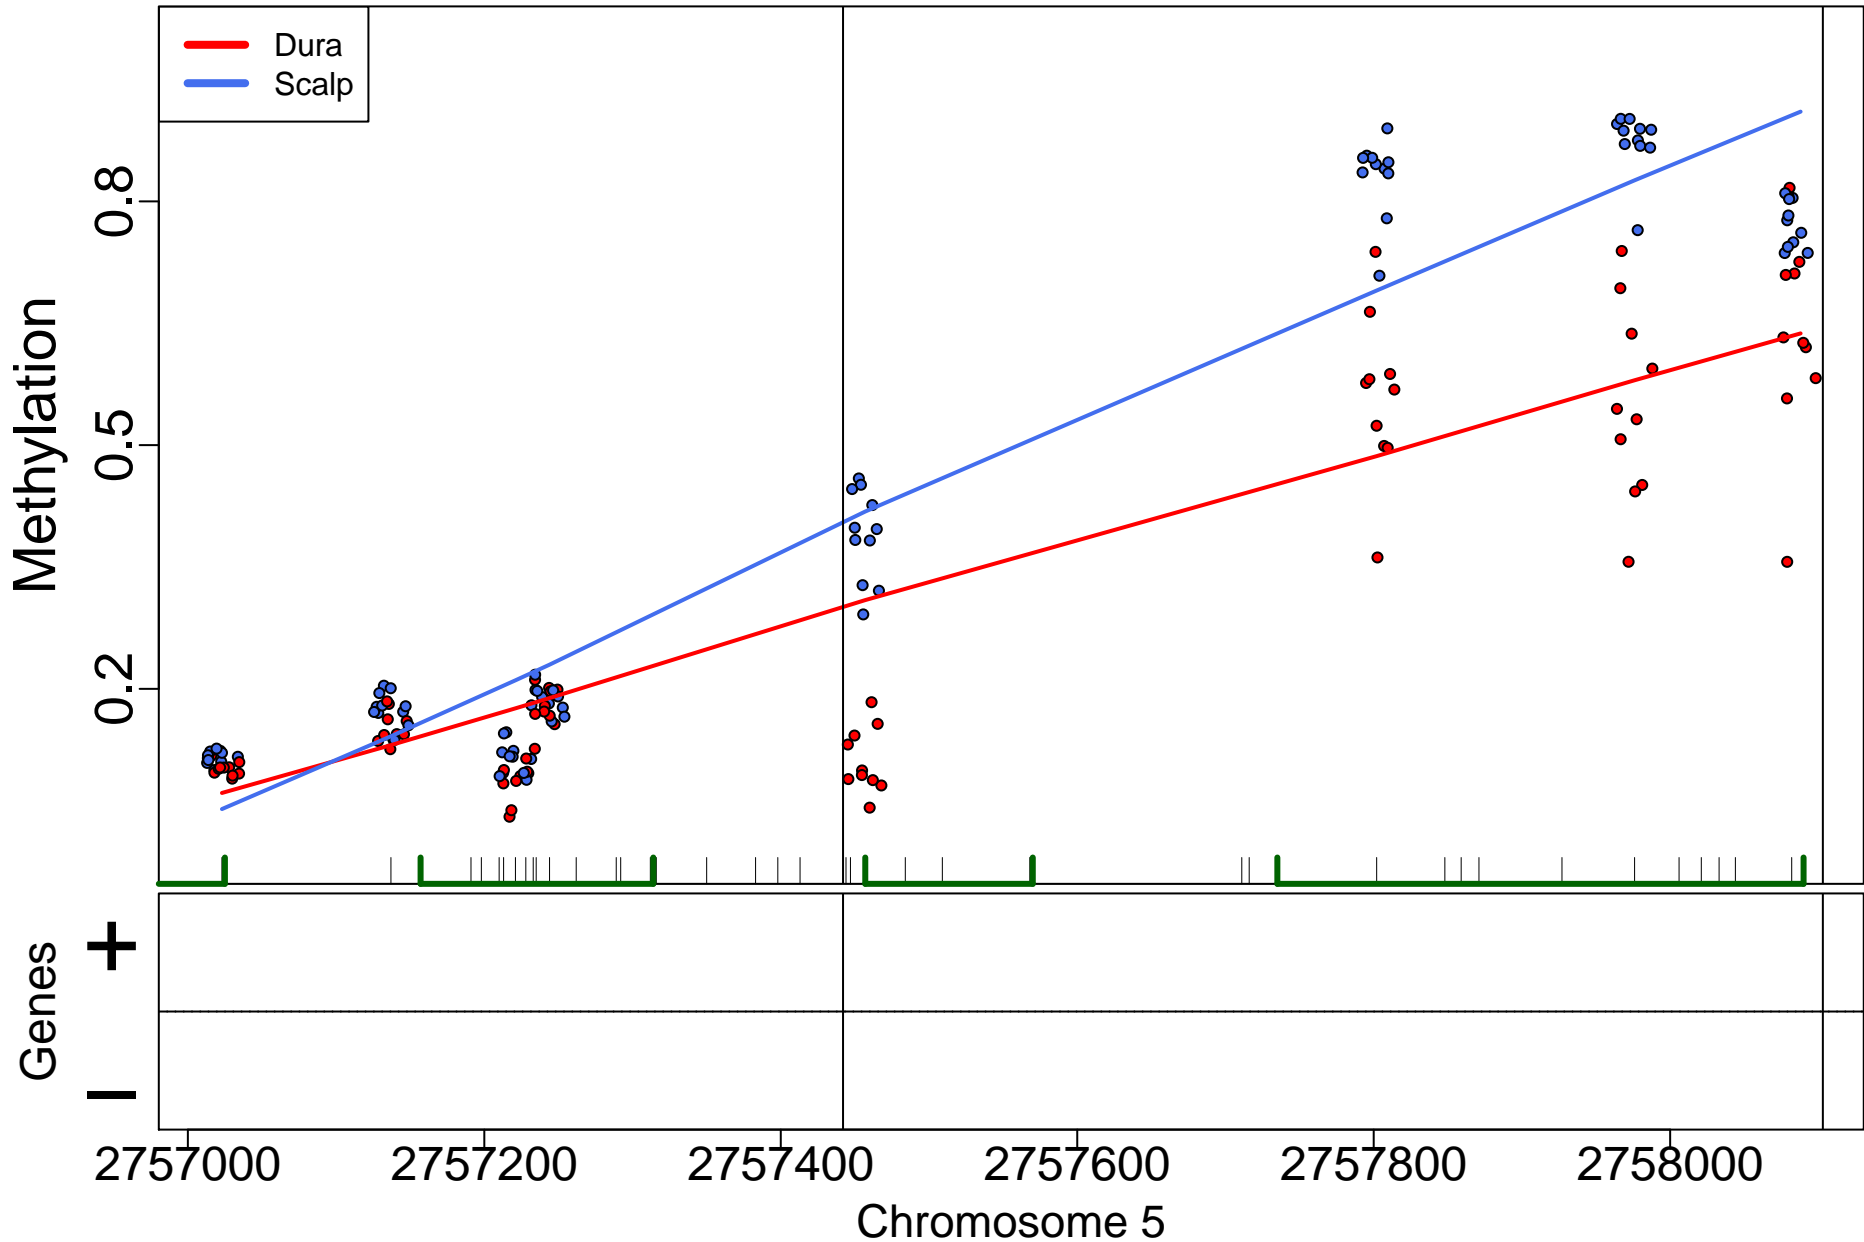

# GALNT9; 19715bp from tss:downstream

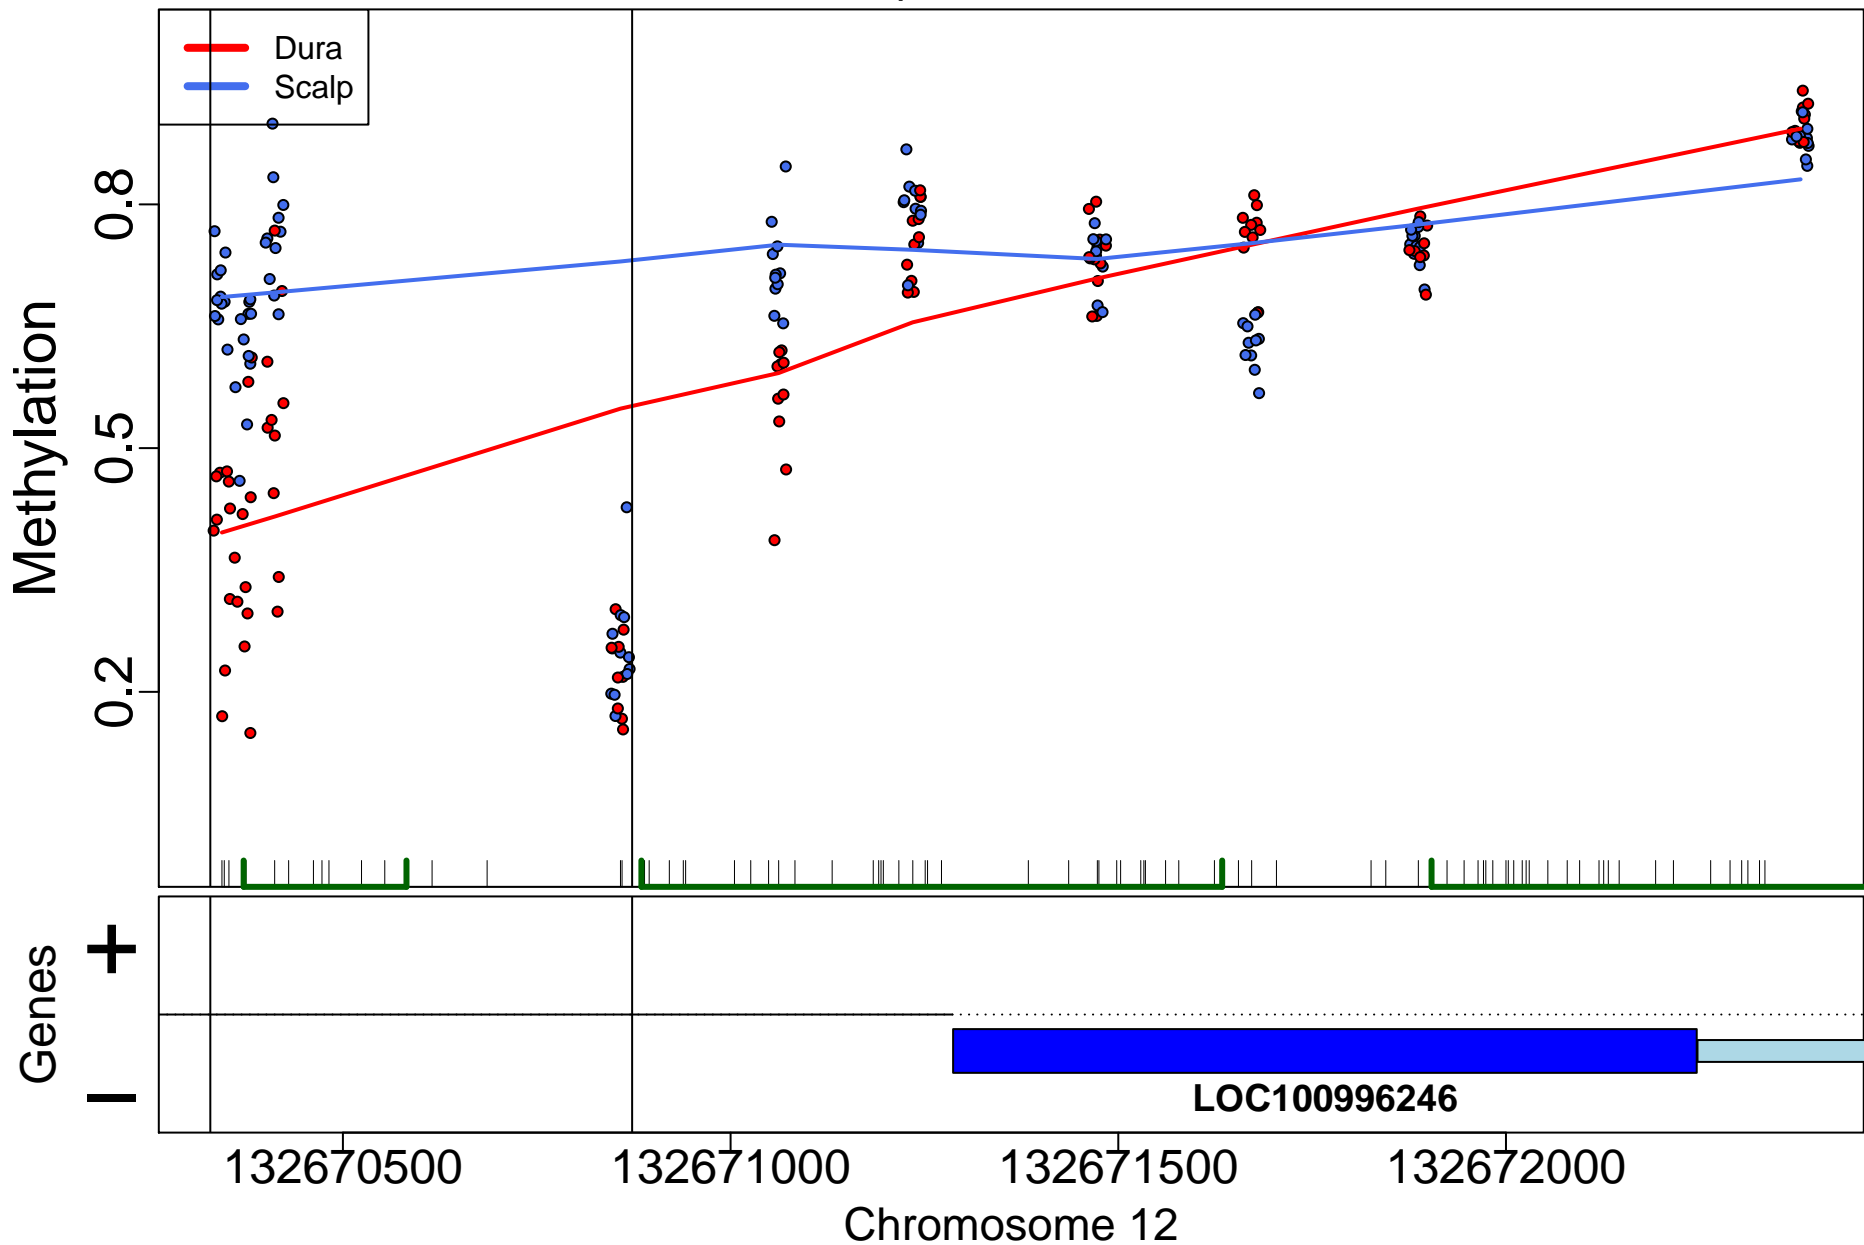

APBB2; 357540bp from tss:inside intron

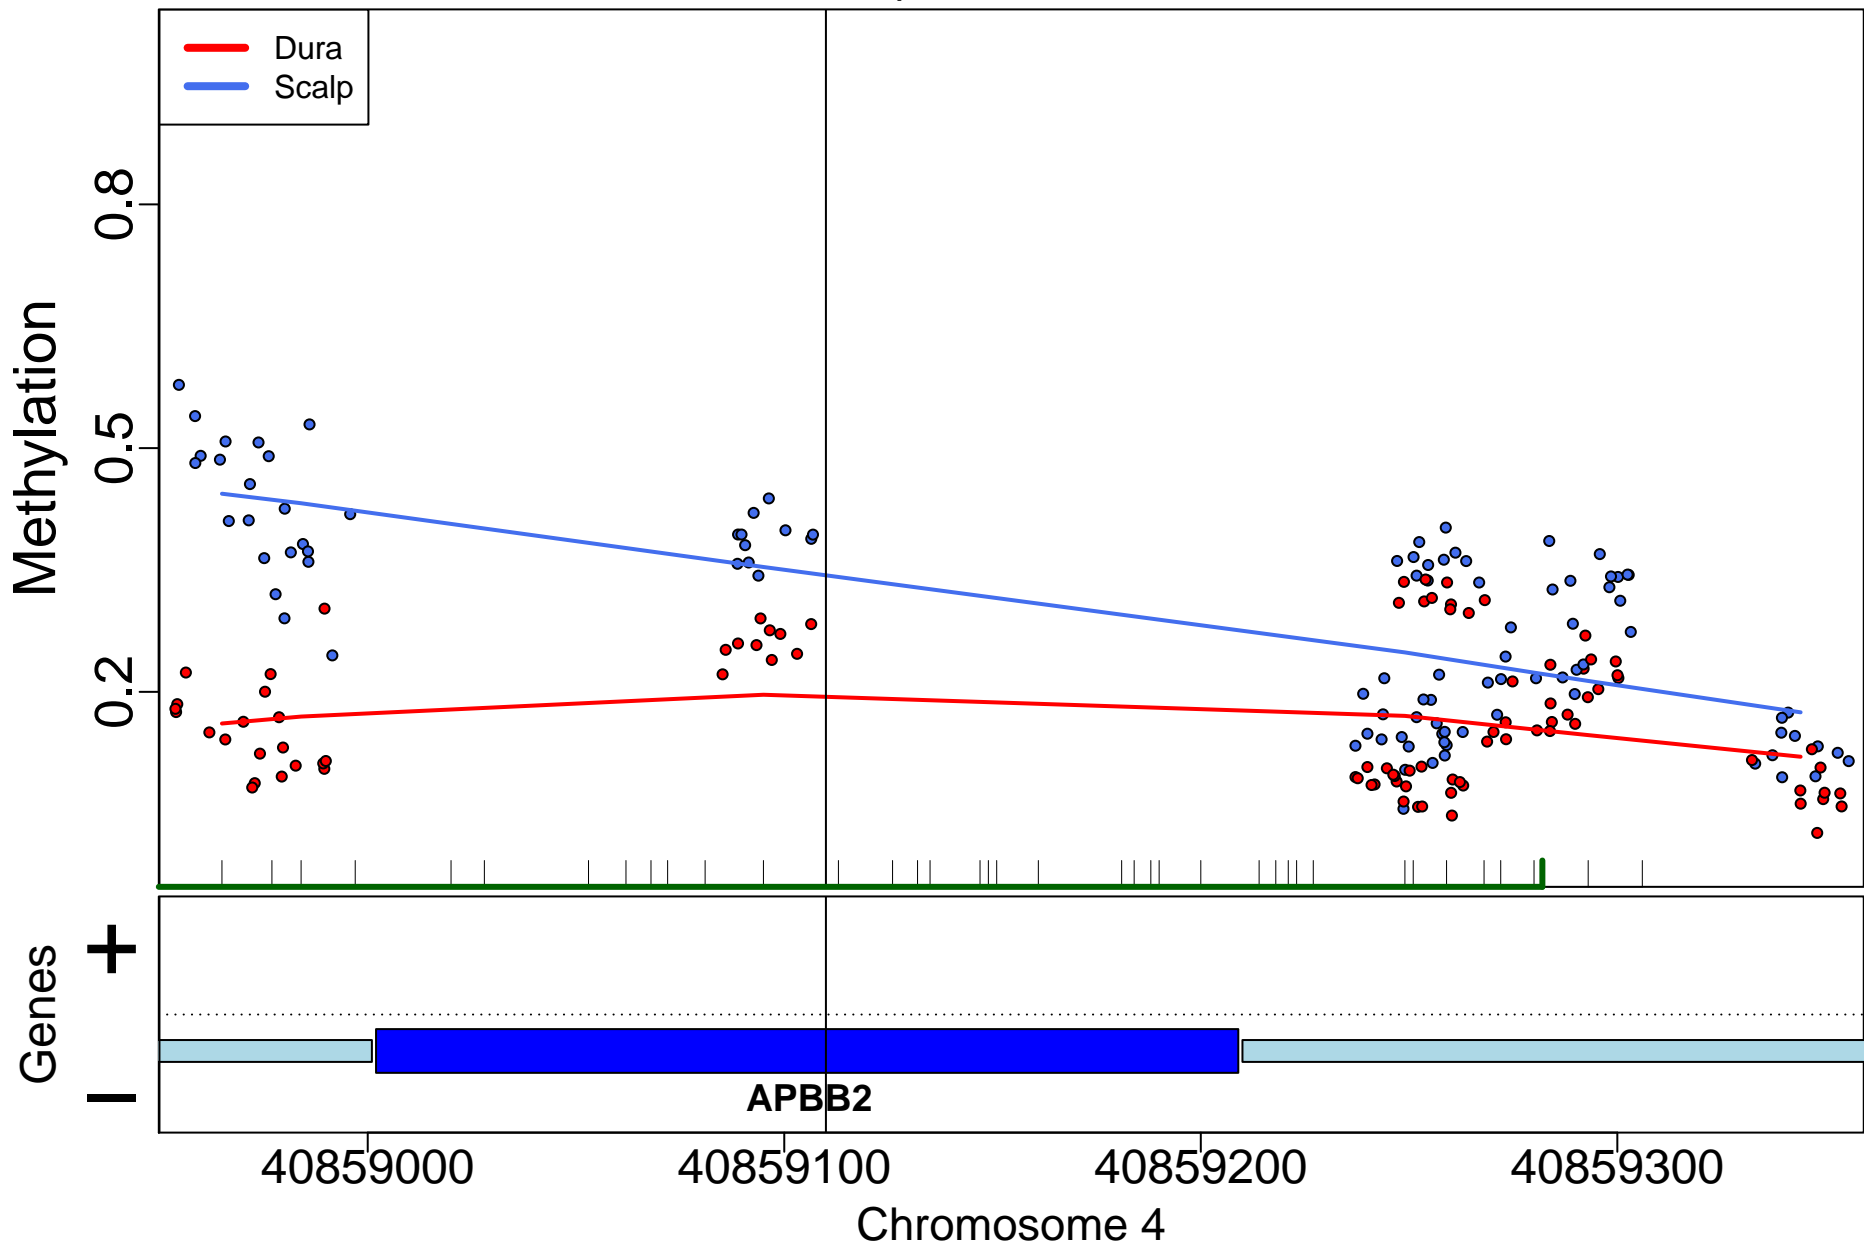



ARHGAP20; 170bp from tss:promoter

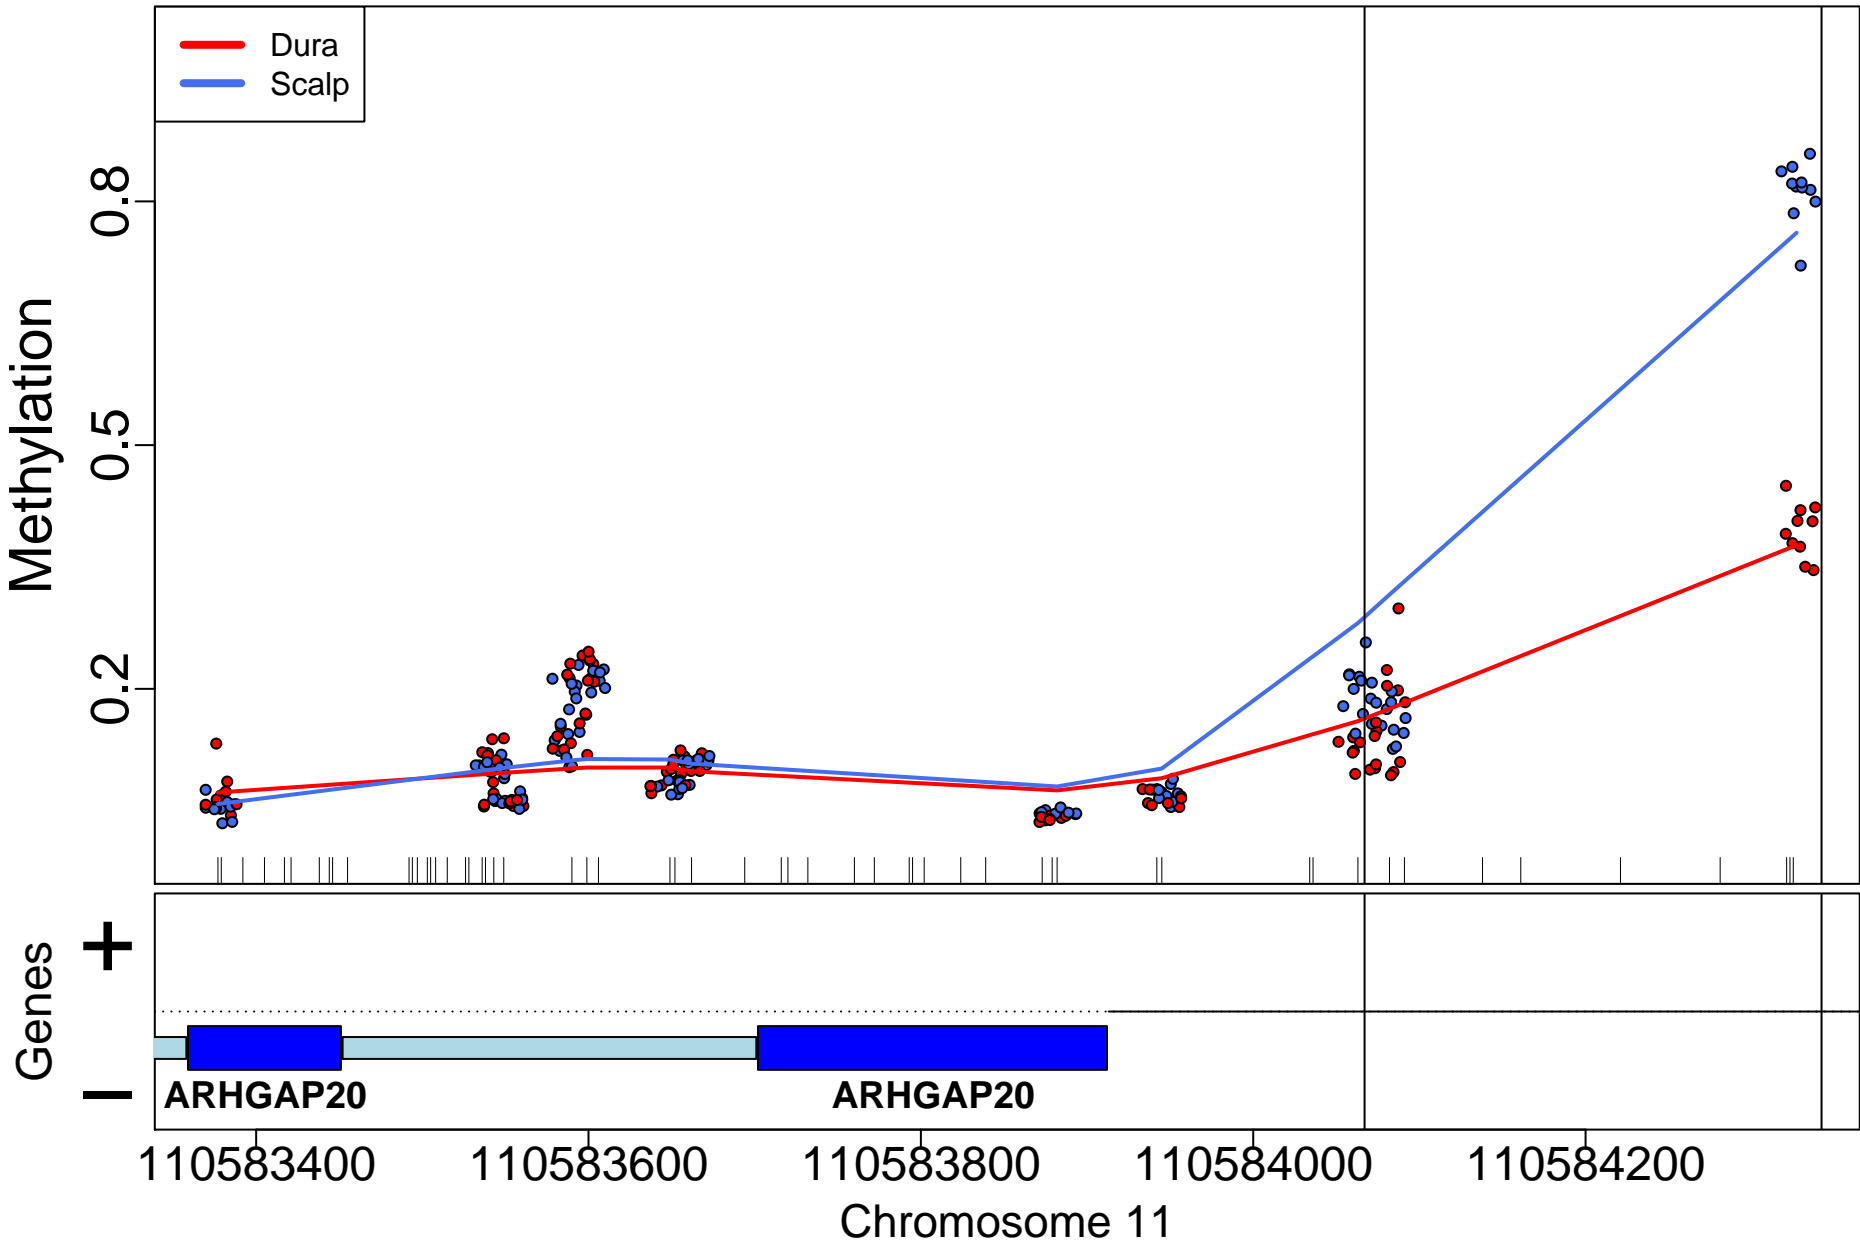

SND1; 314388bp from tss:inside intron

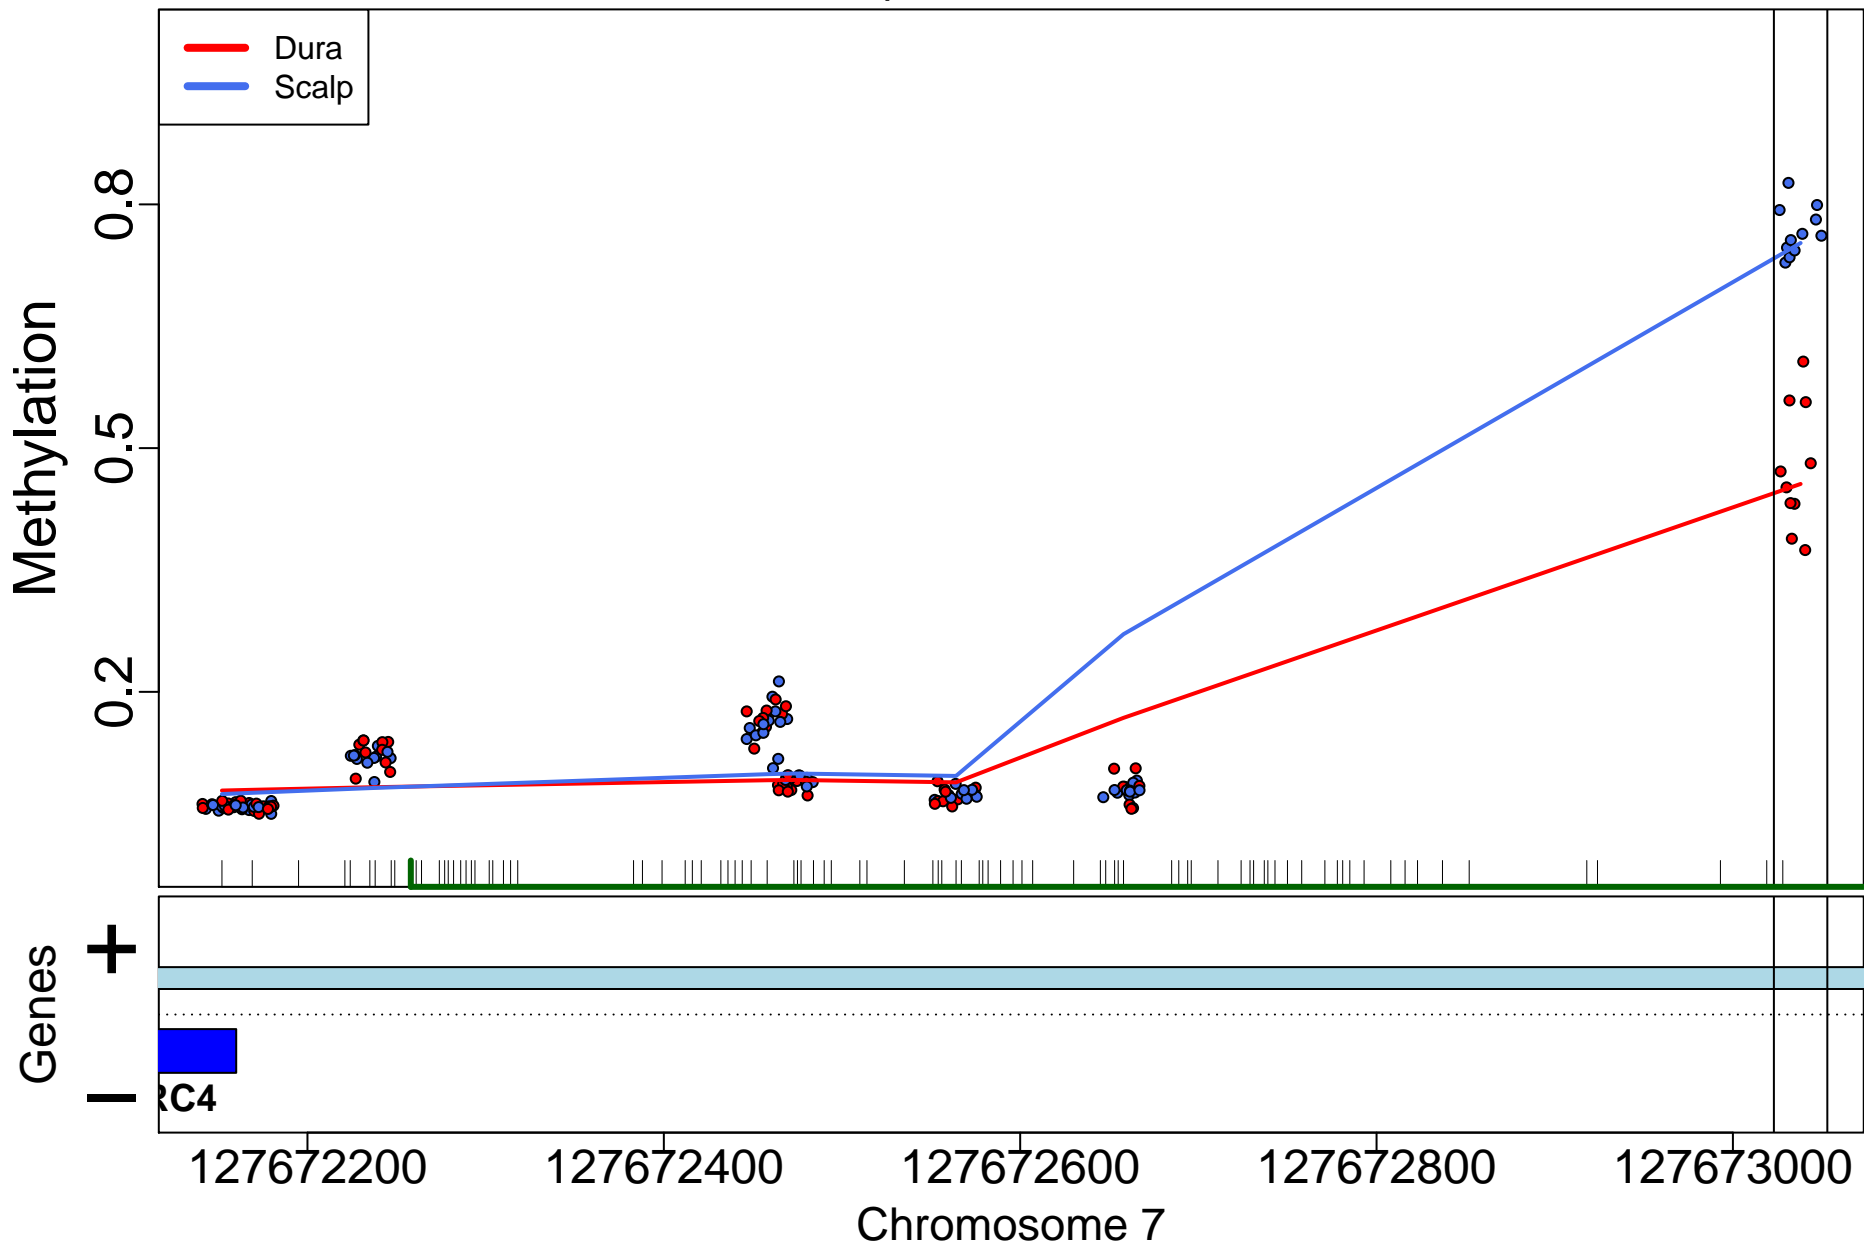

# GPR25; 807bp from tss:overlaps 3'

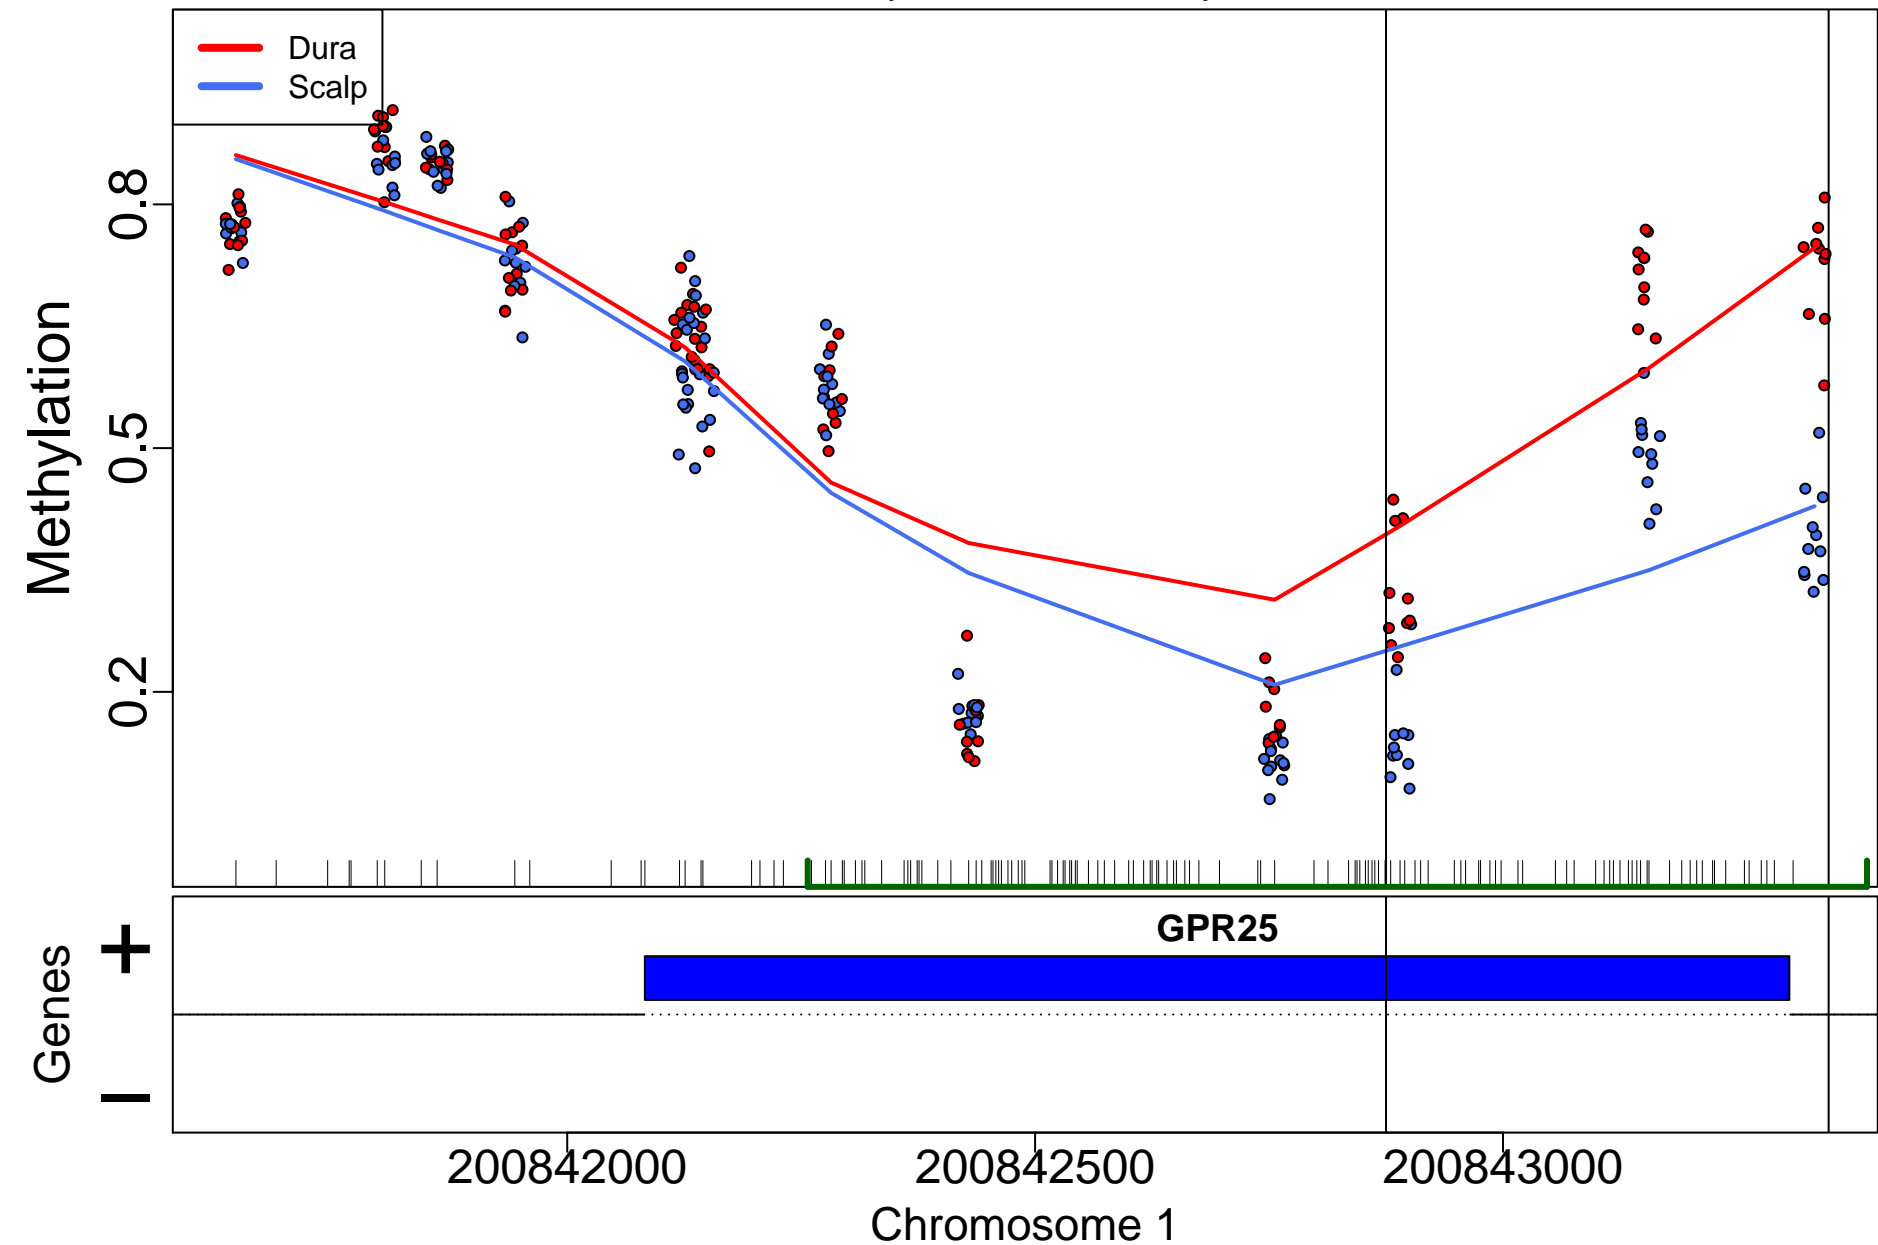

ZMYND11; 680bp from tss:promoter

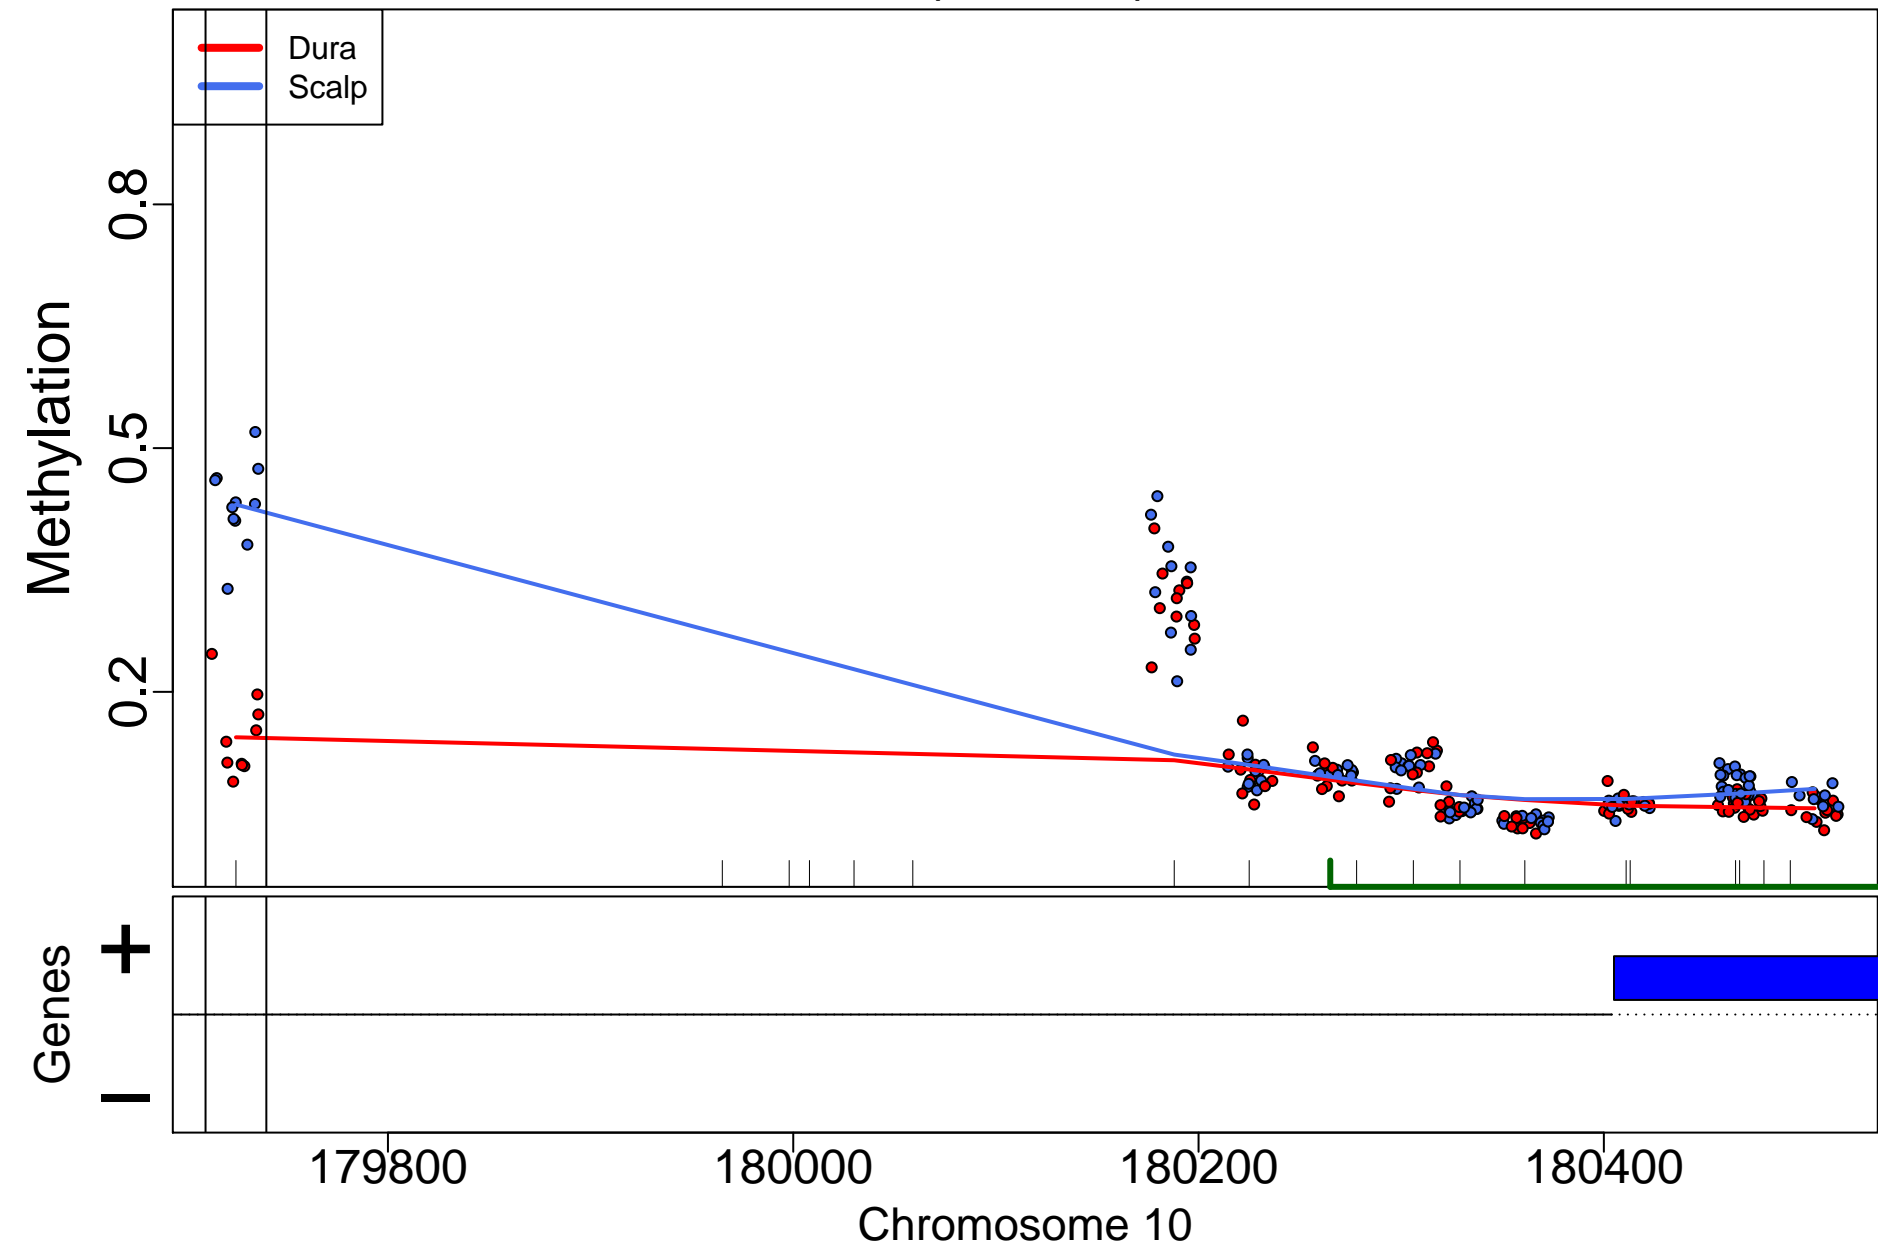

SMOC2; 7974bp from tss:inside intron

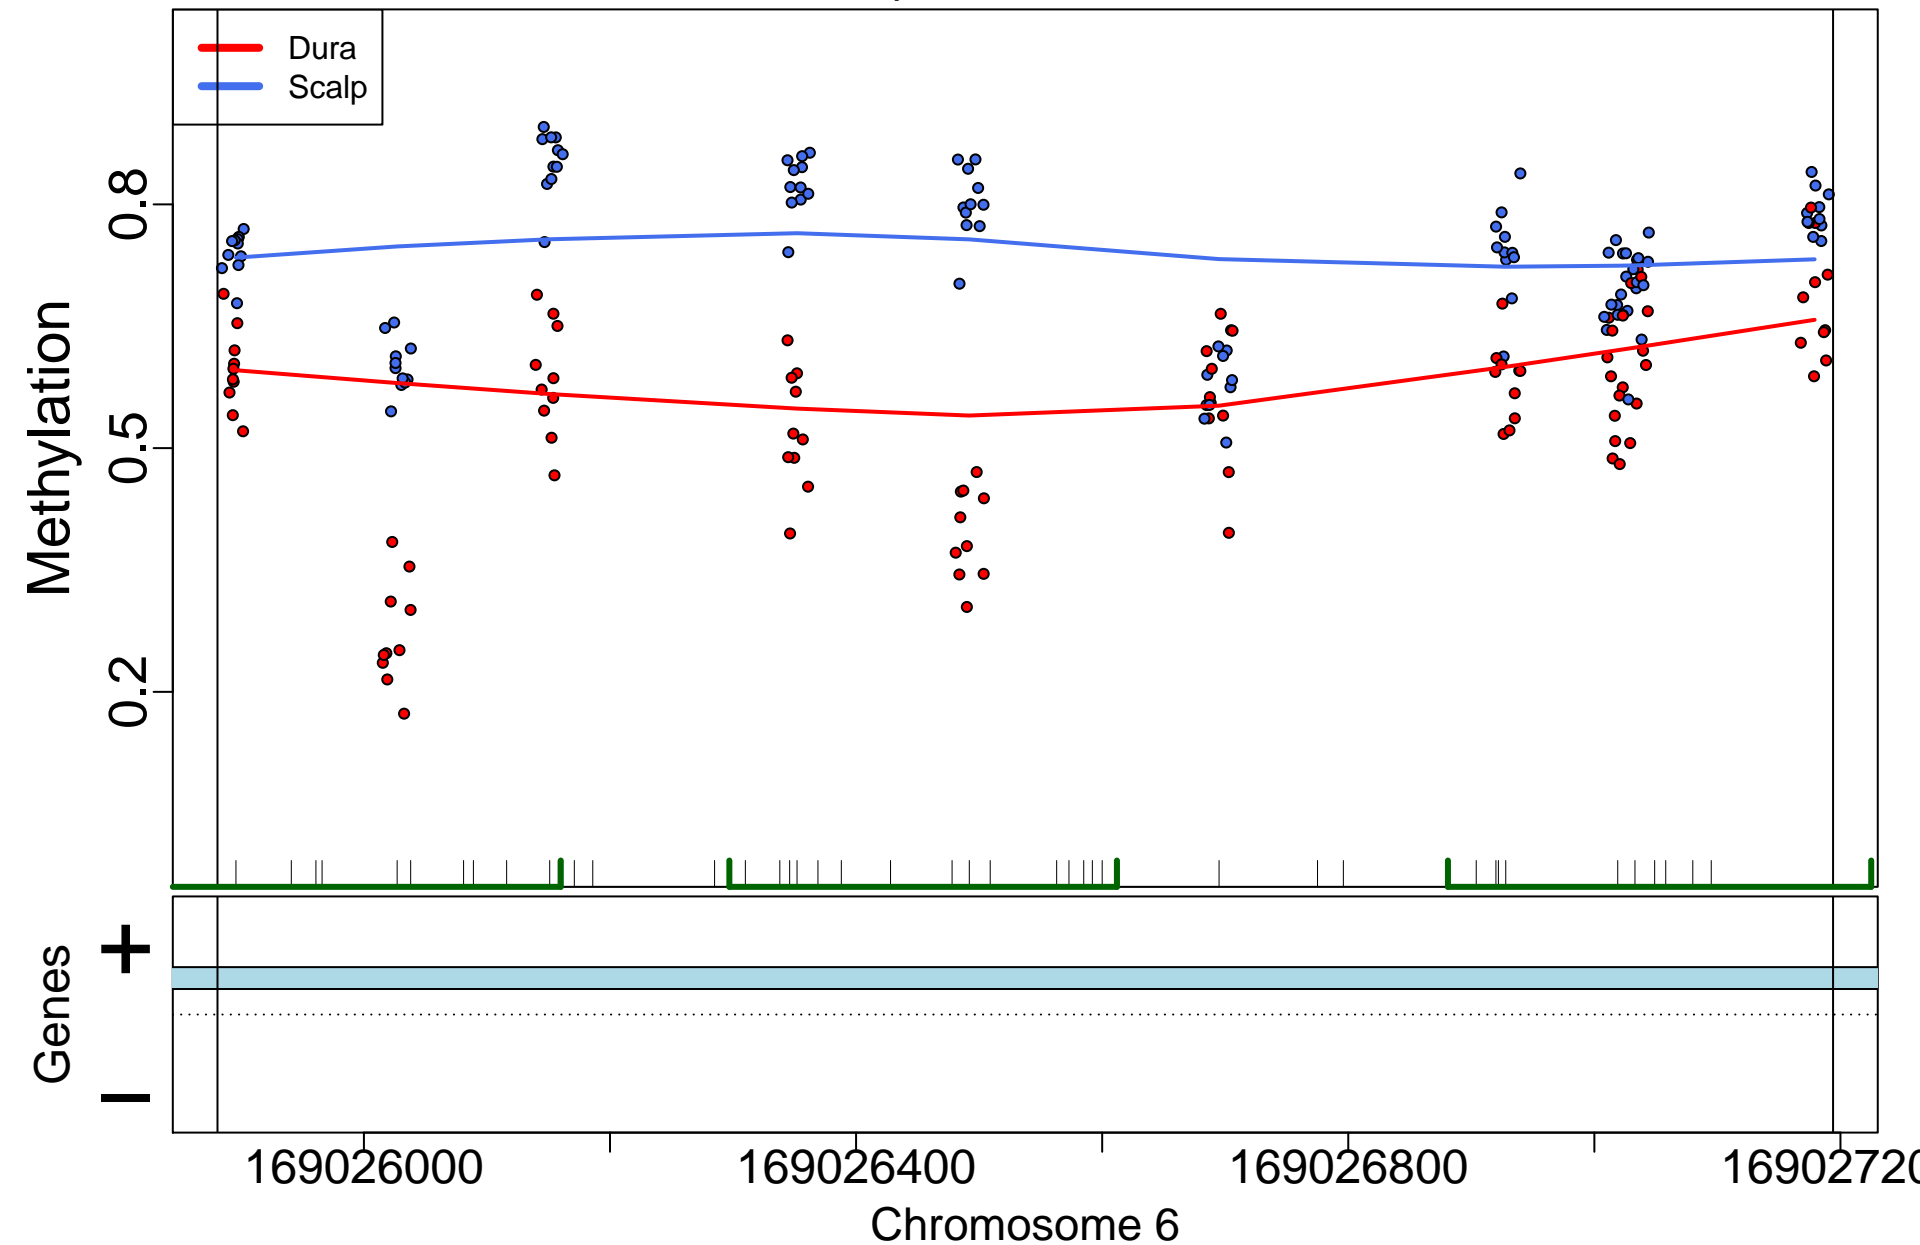

MRPL3; 181bp from tss:promoter

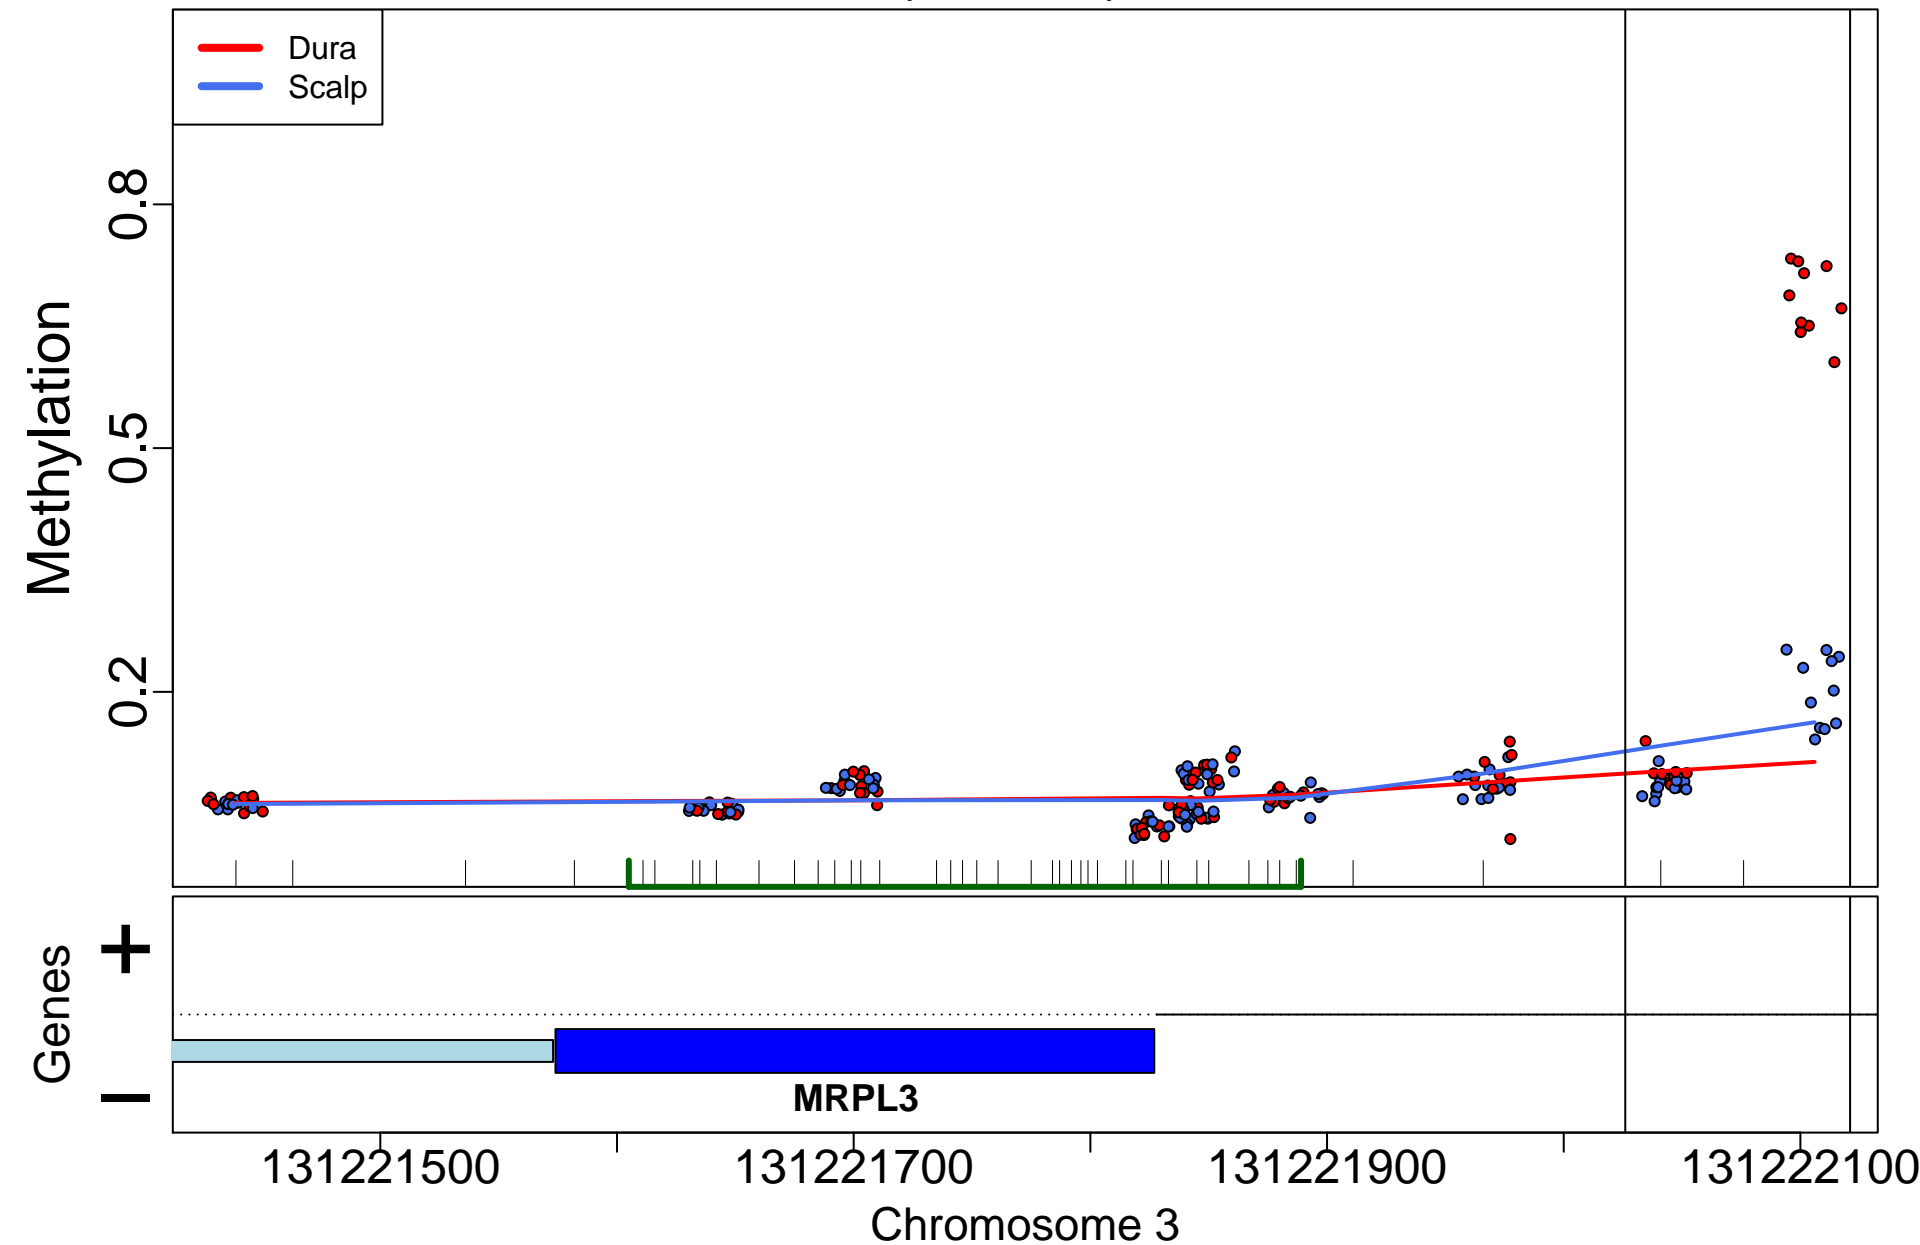

KIAA0226; 1048bp from tss:inside intron

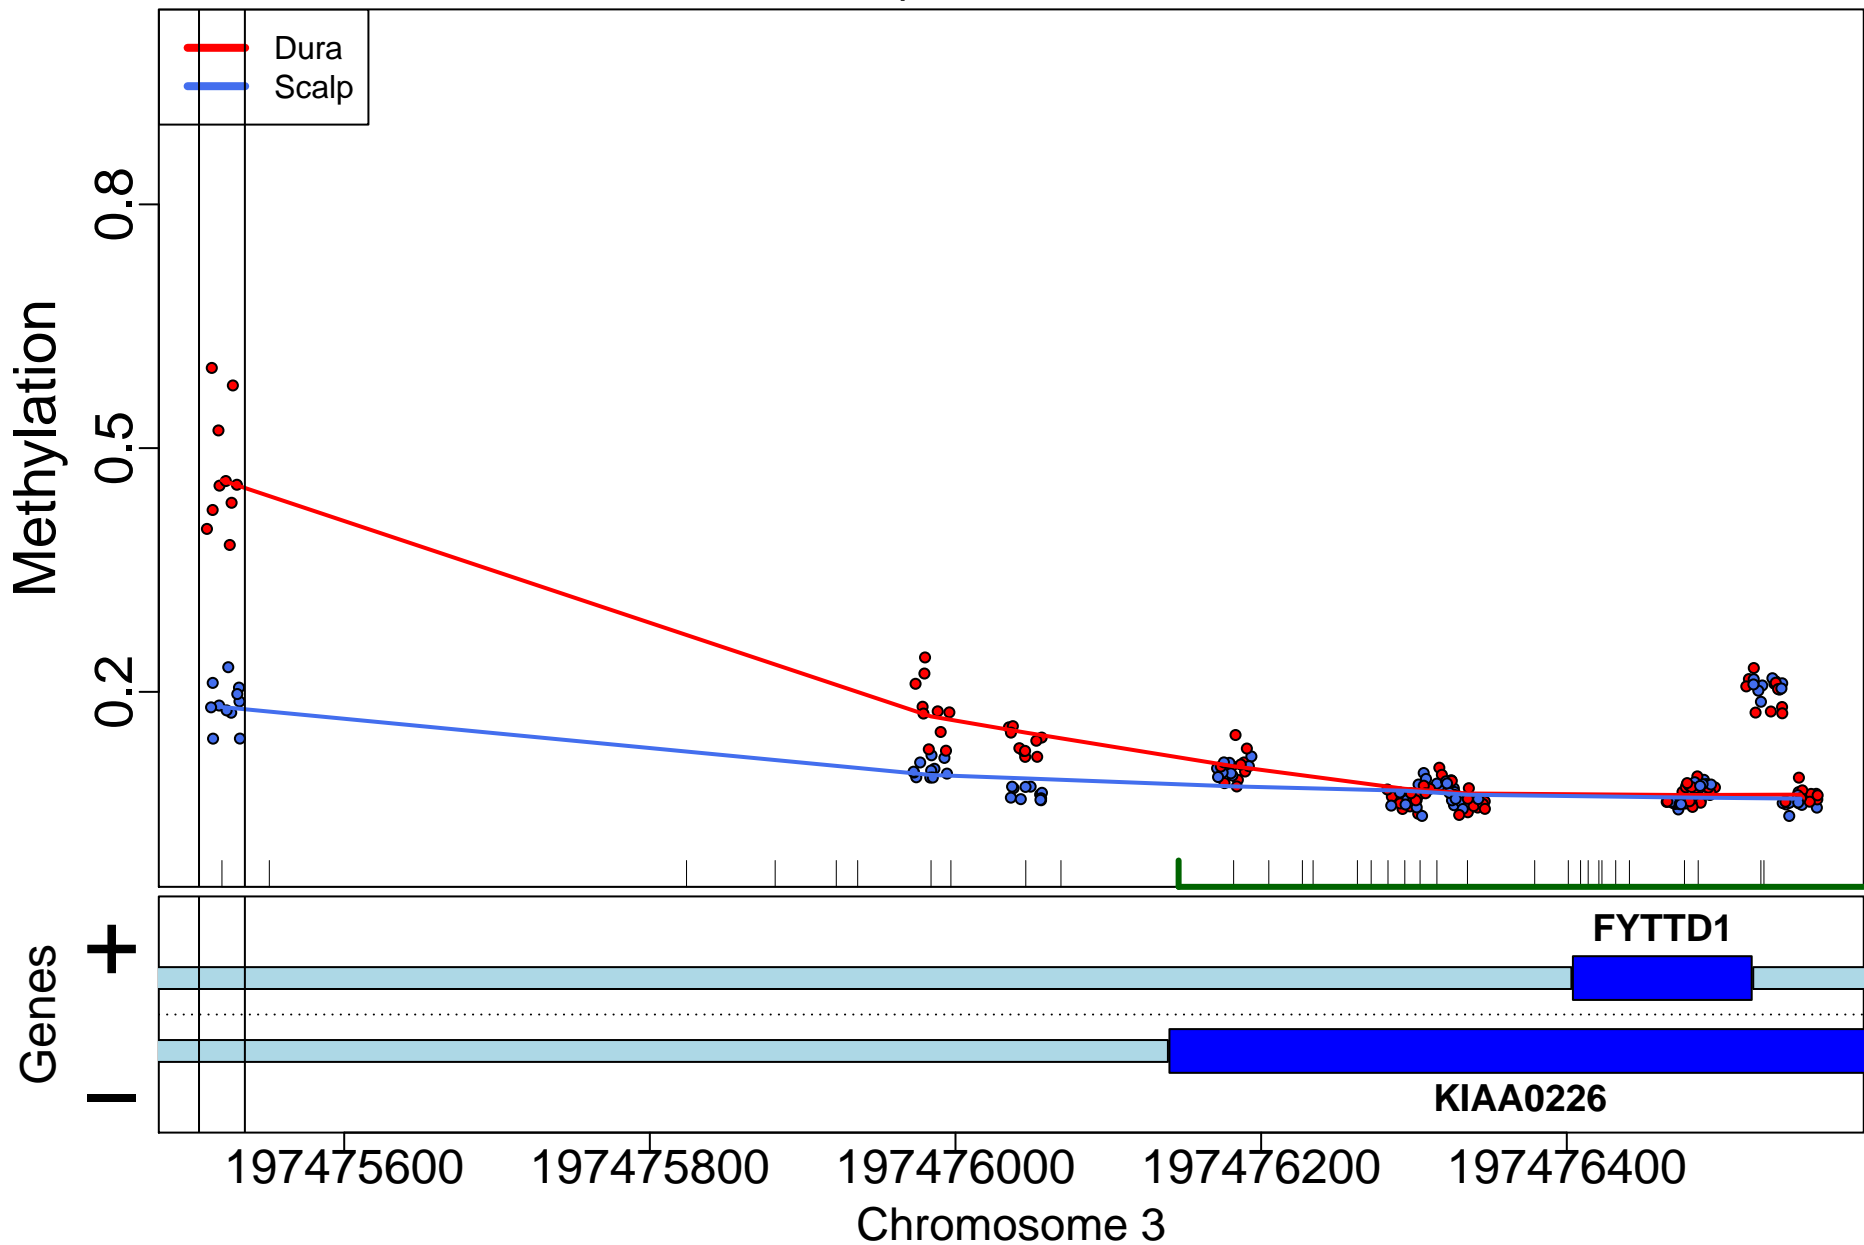

MAP3K5; 1192bp from tss:inside intron

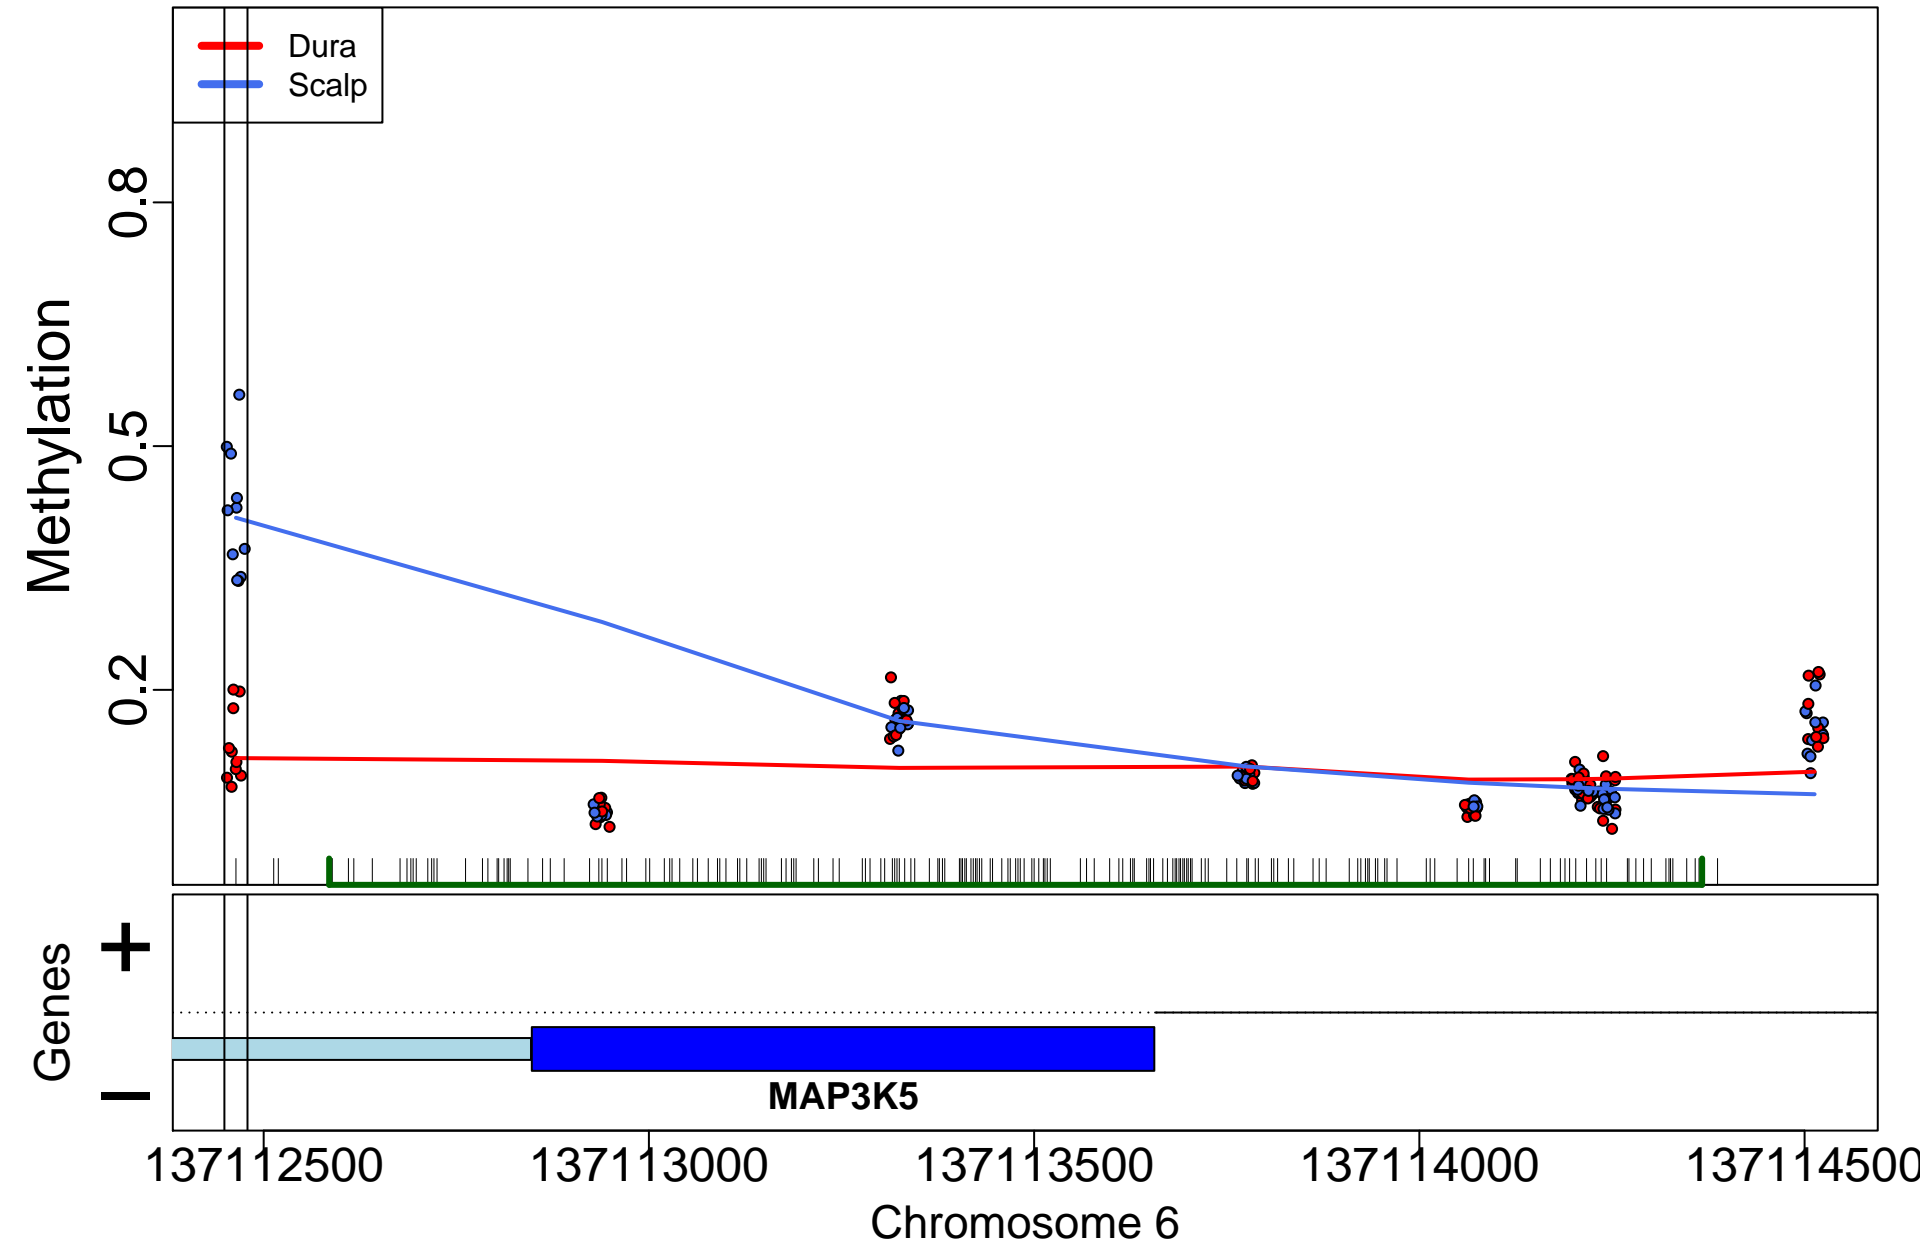



## LINC01135; 29547bp from tss:inside intron

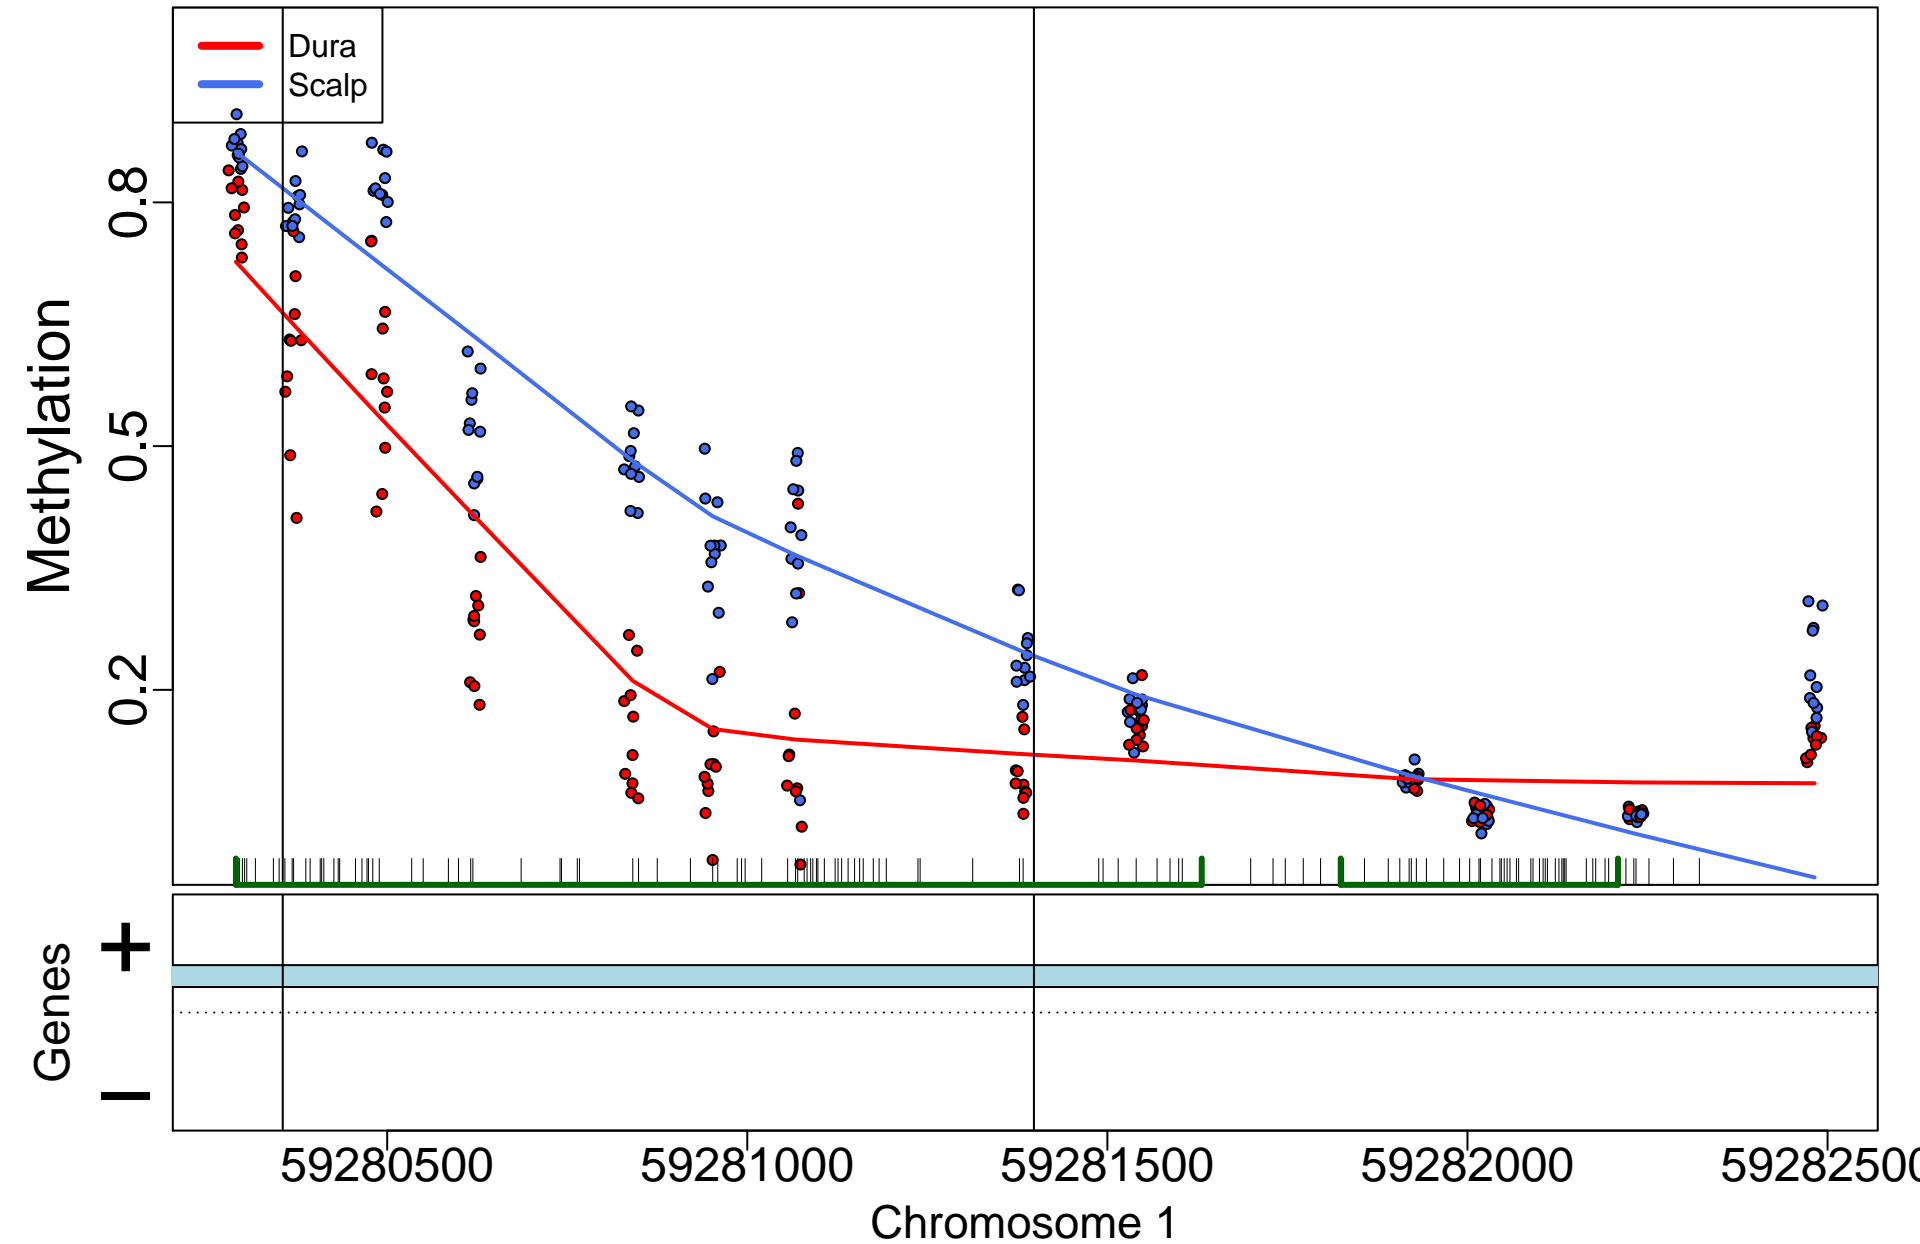

# HES1; 68106bp from tss:downstream

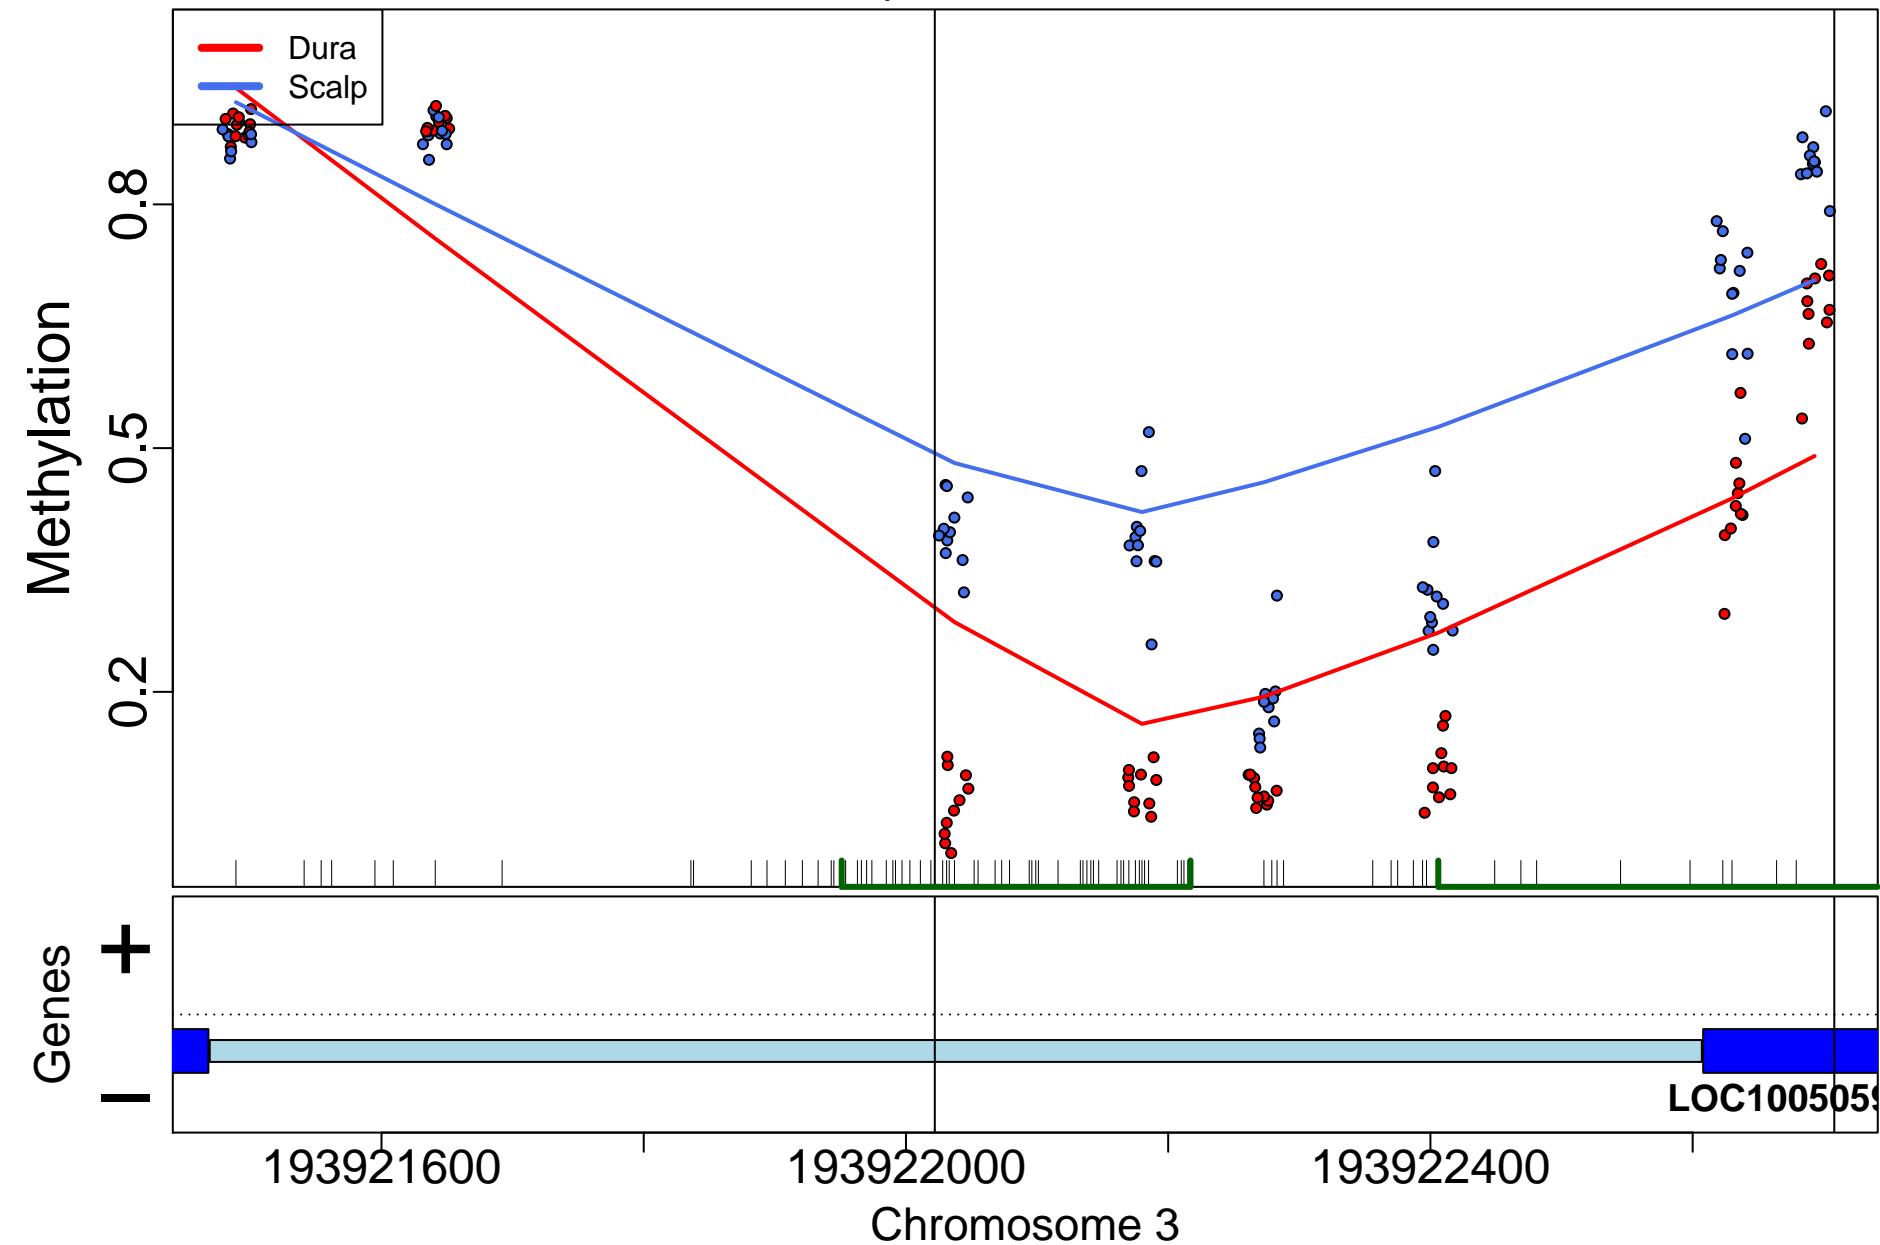

FBN2; 1587bp from tss:covers exon(s)

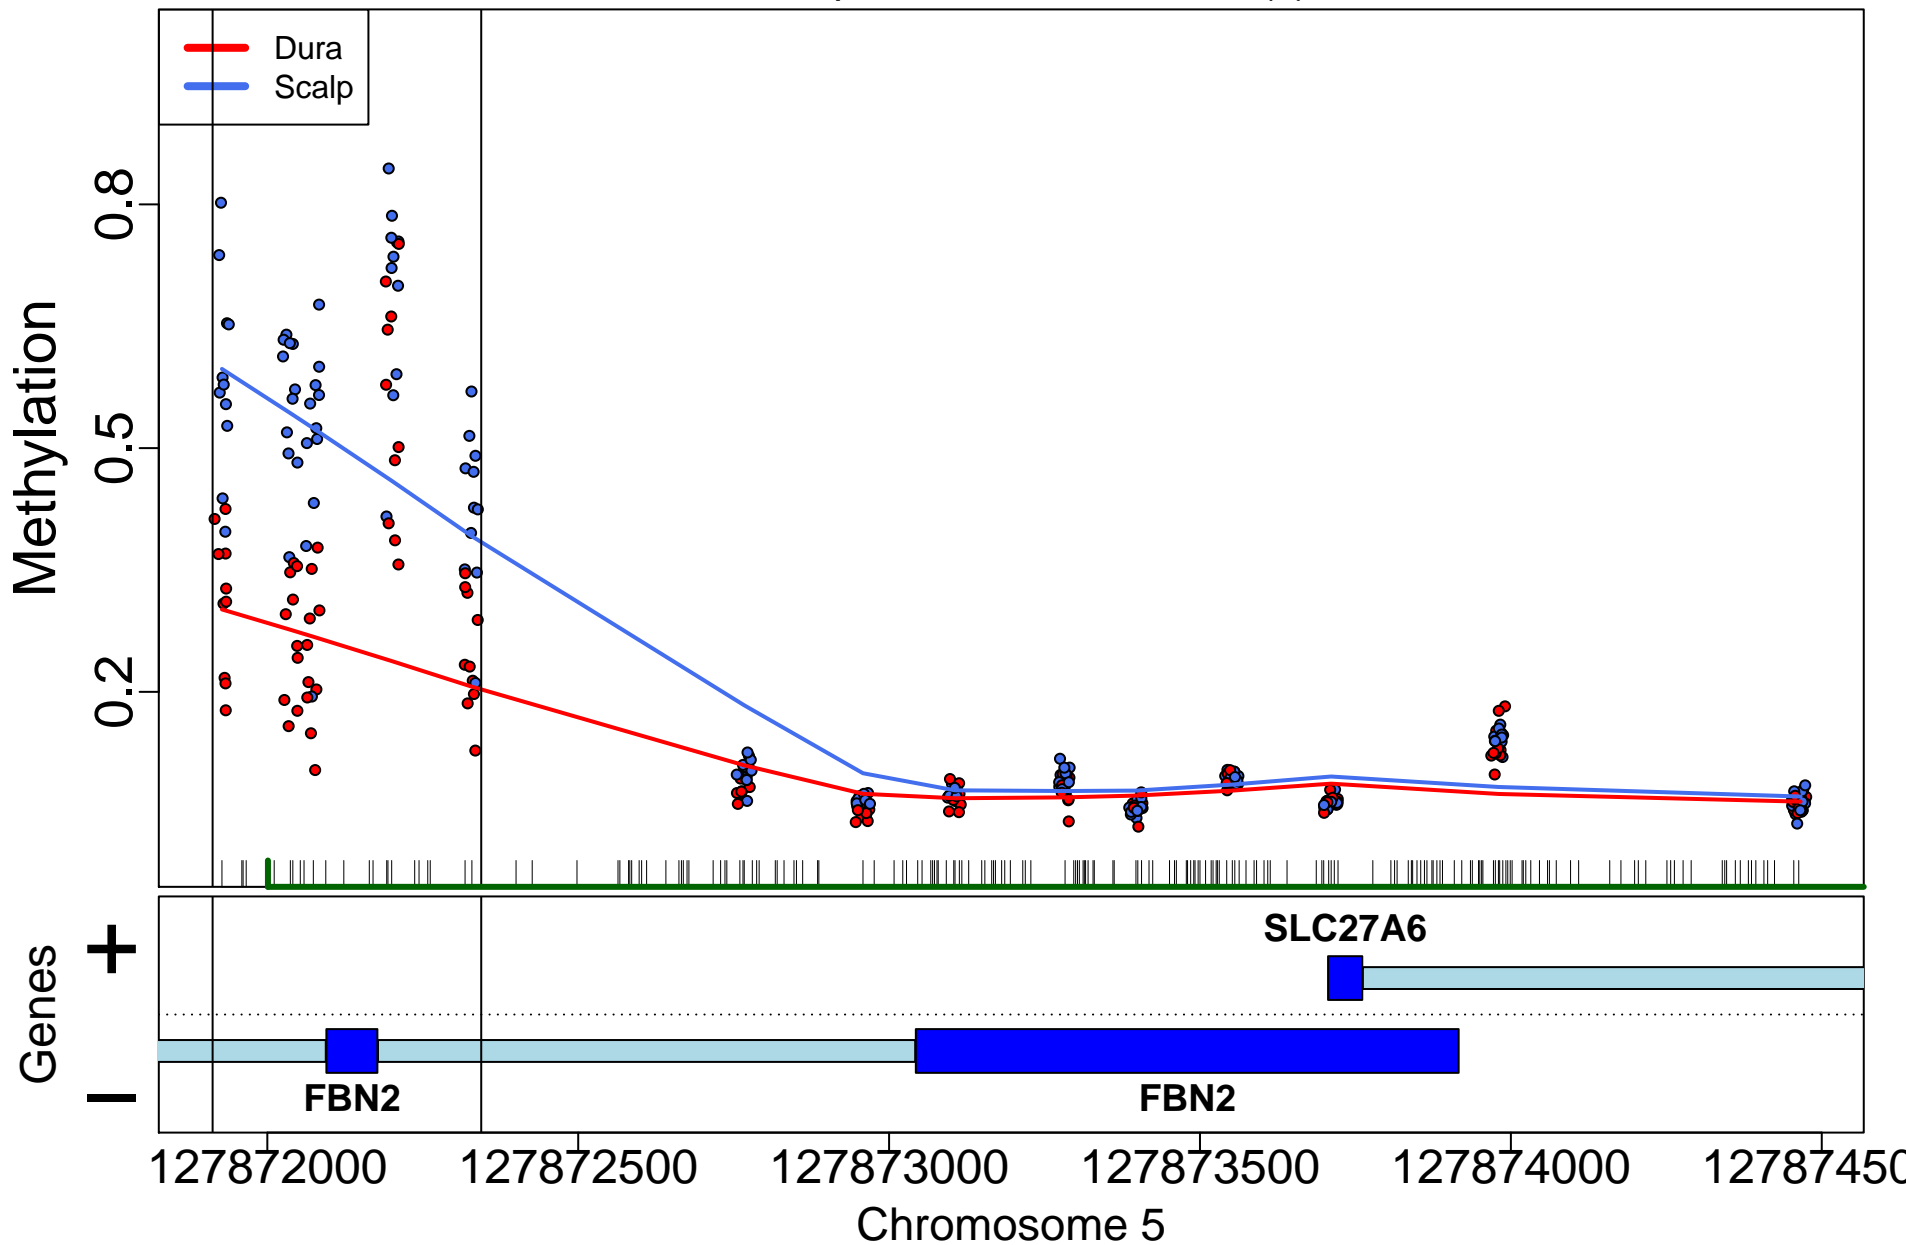

LINC01105; 0bp from tss:NA

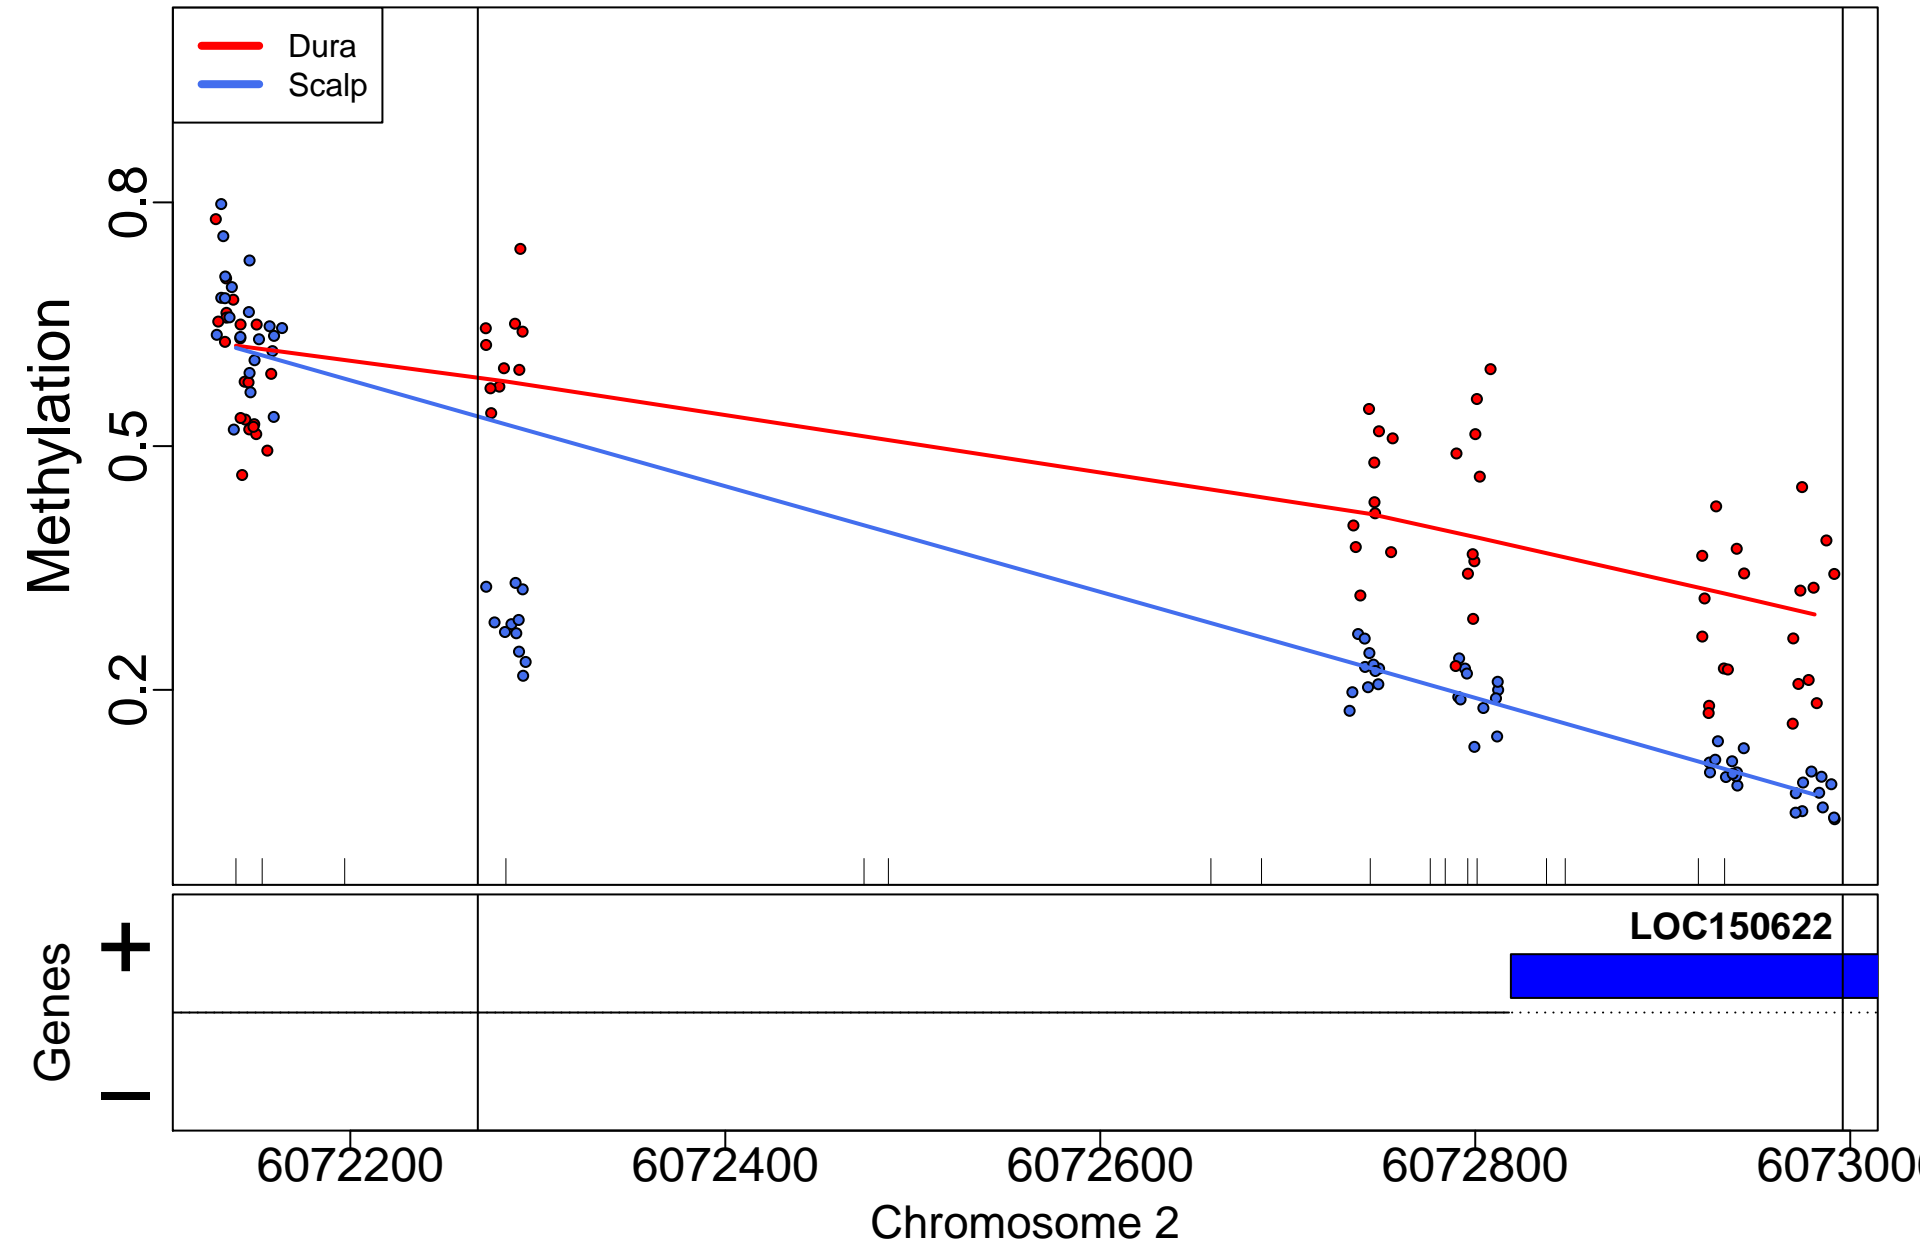

ABHD8; 488bp from tss:promoter

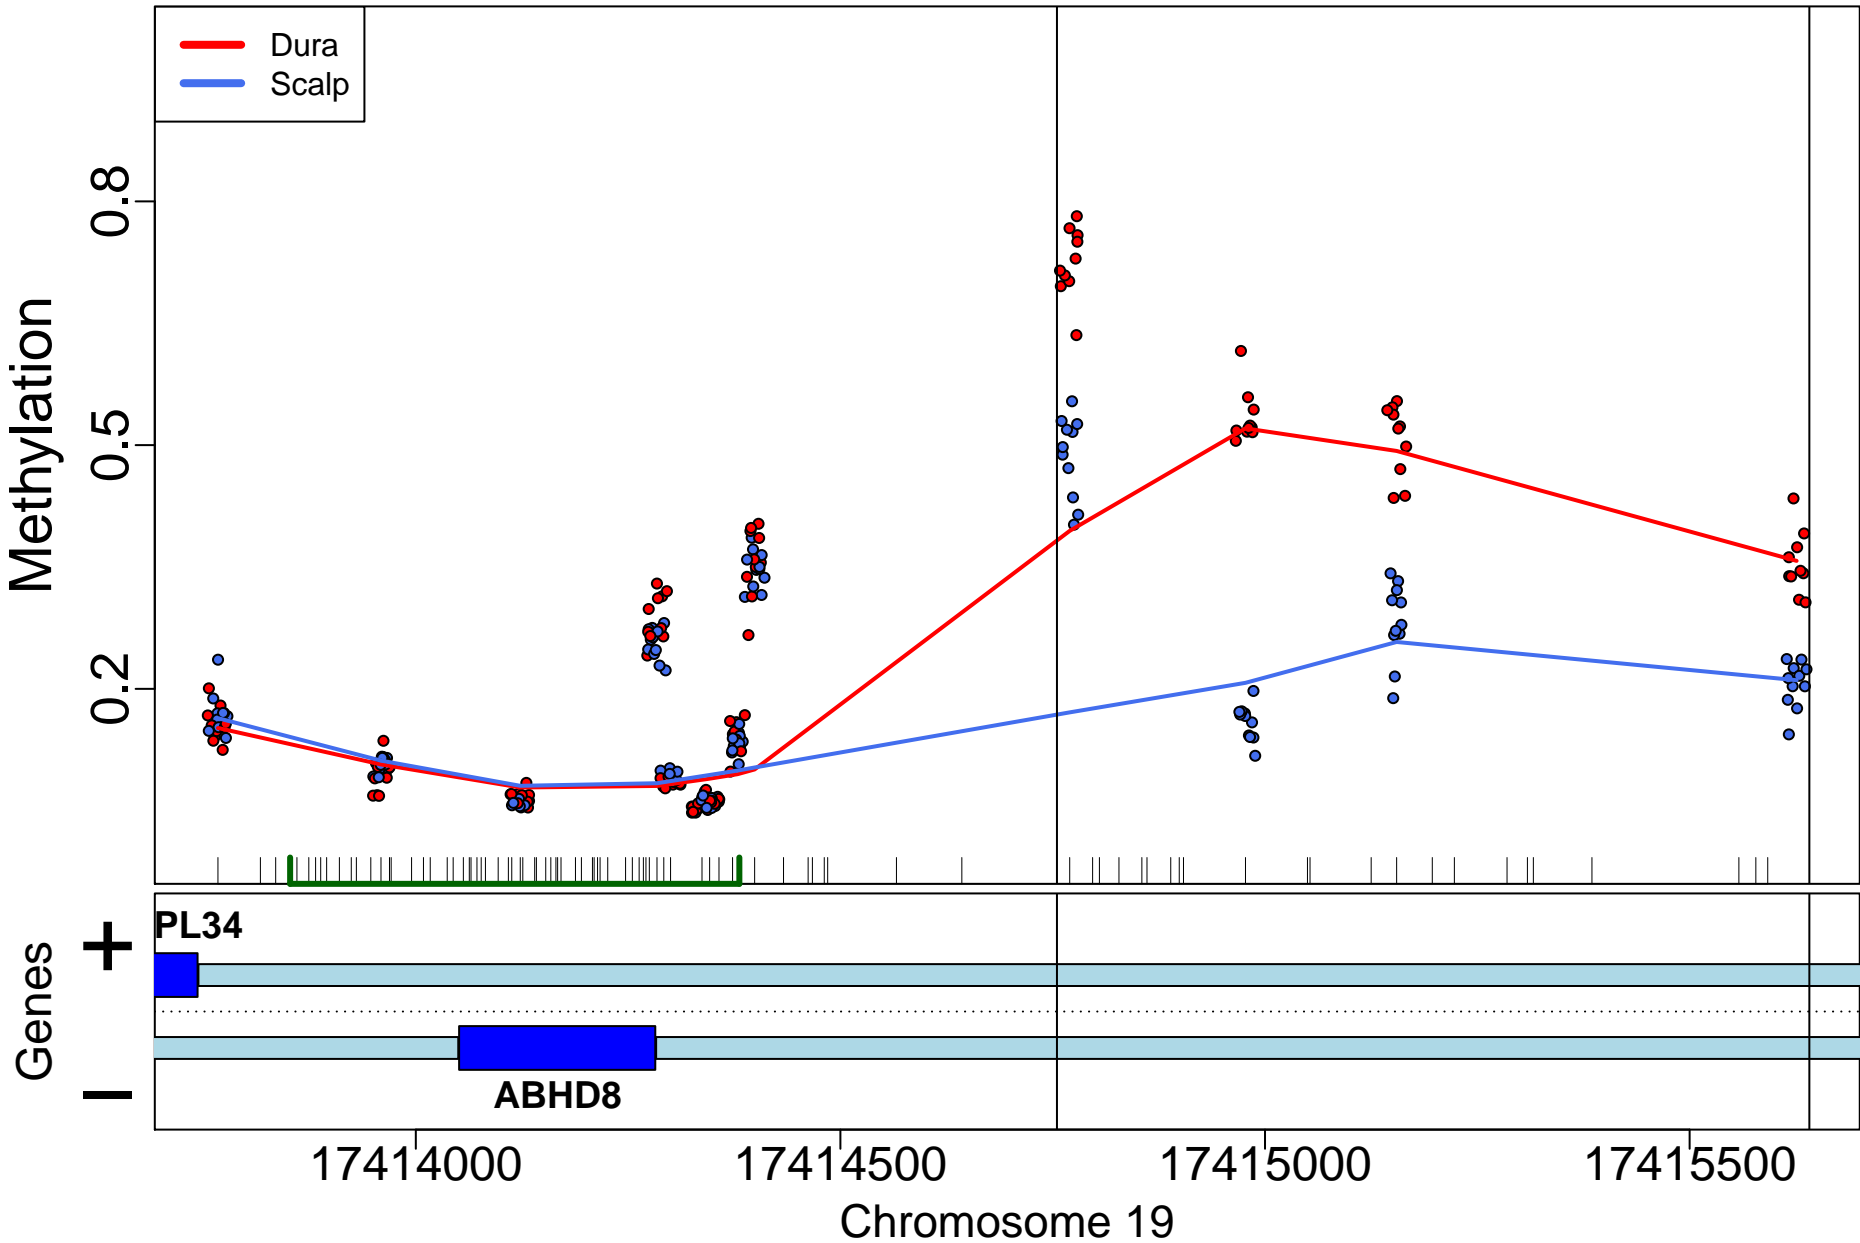

# GSC; 1673bp from tss:inside exon

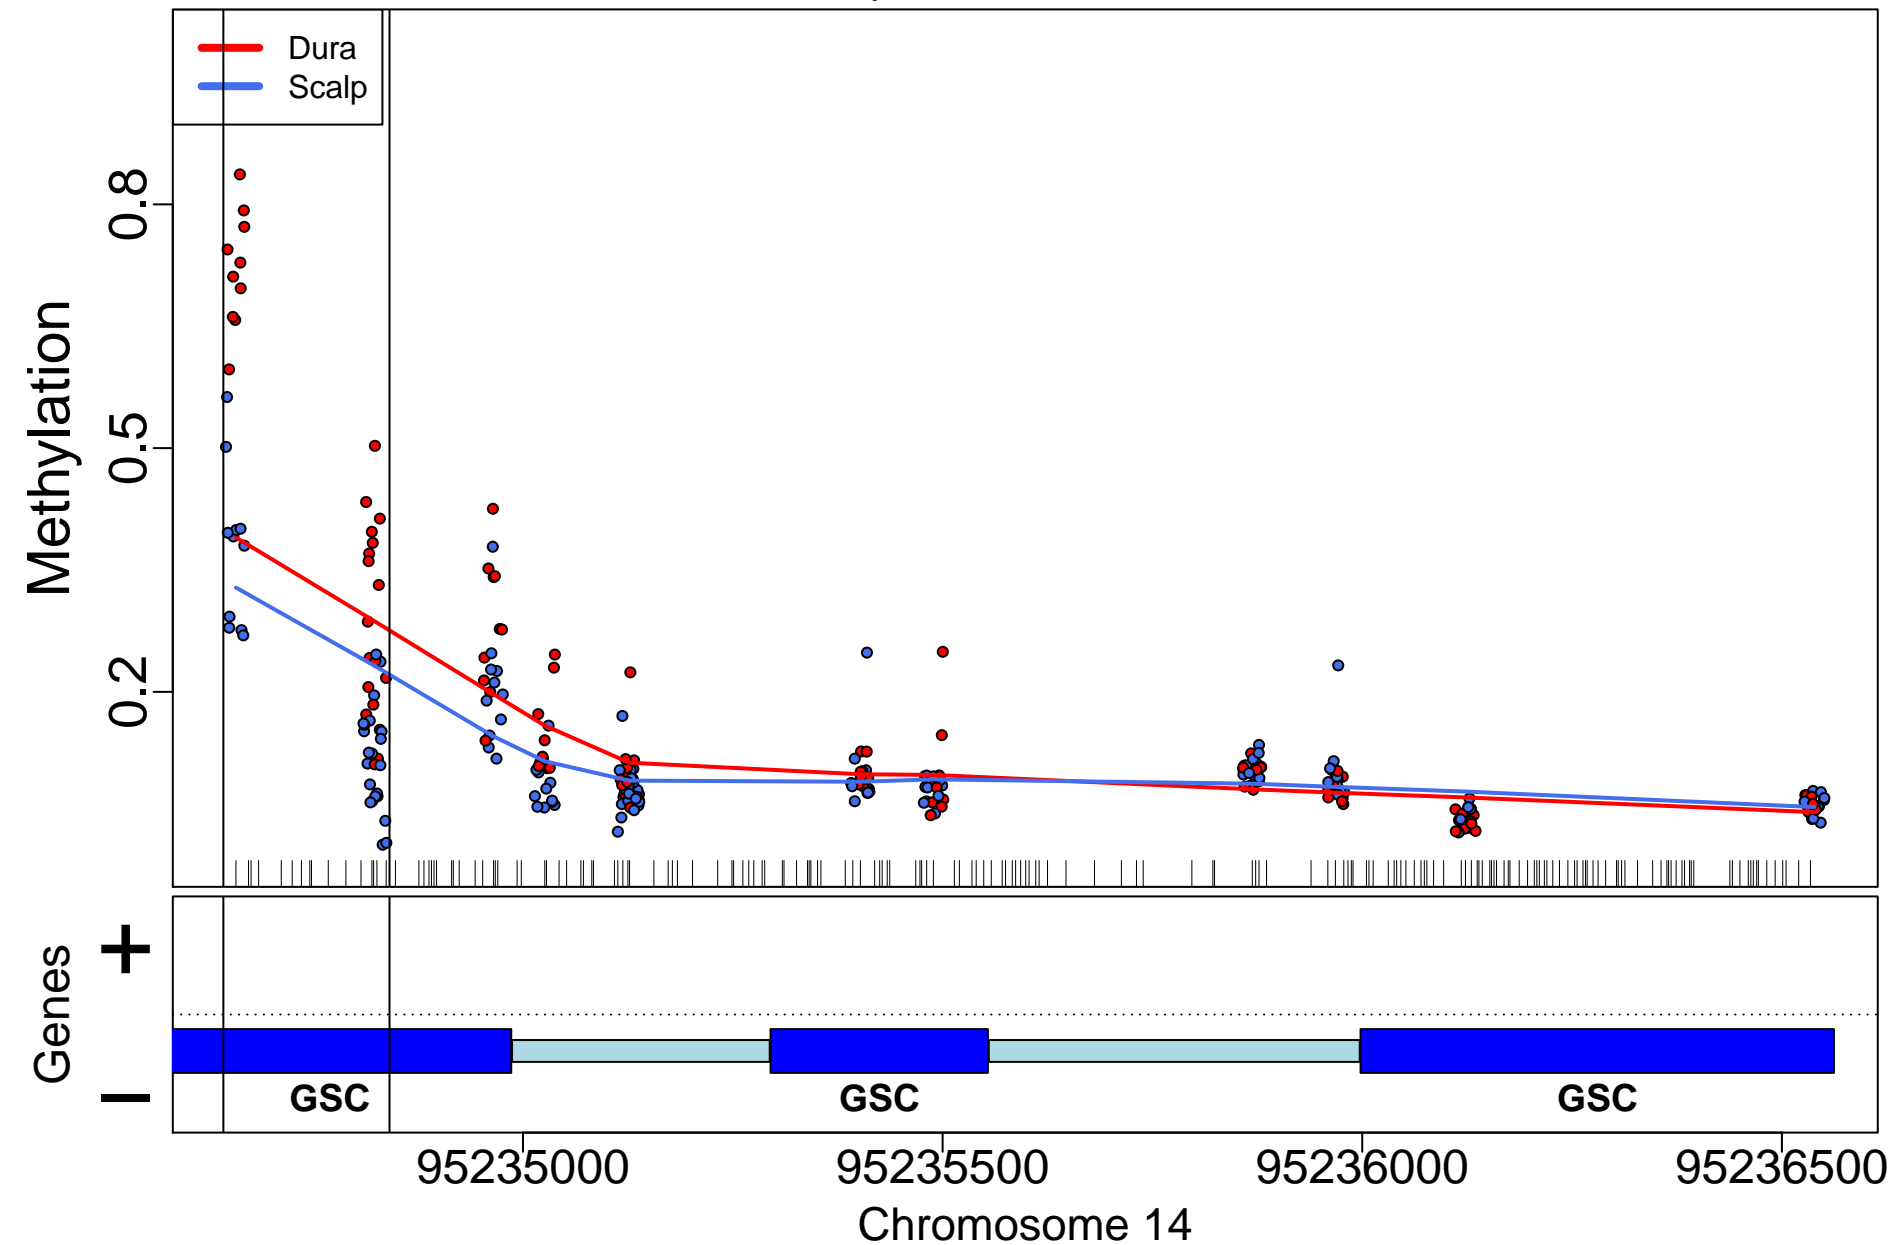

SPATS1; 0bp from tss:NA

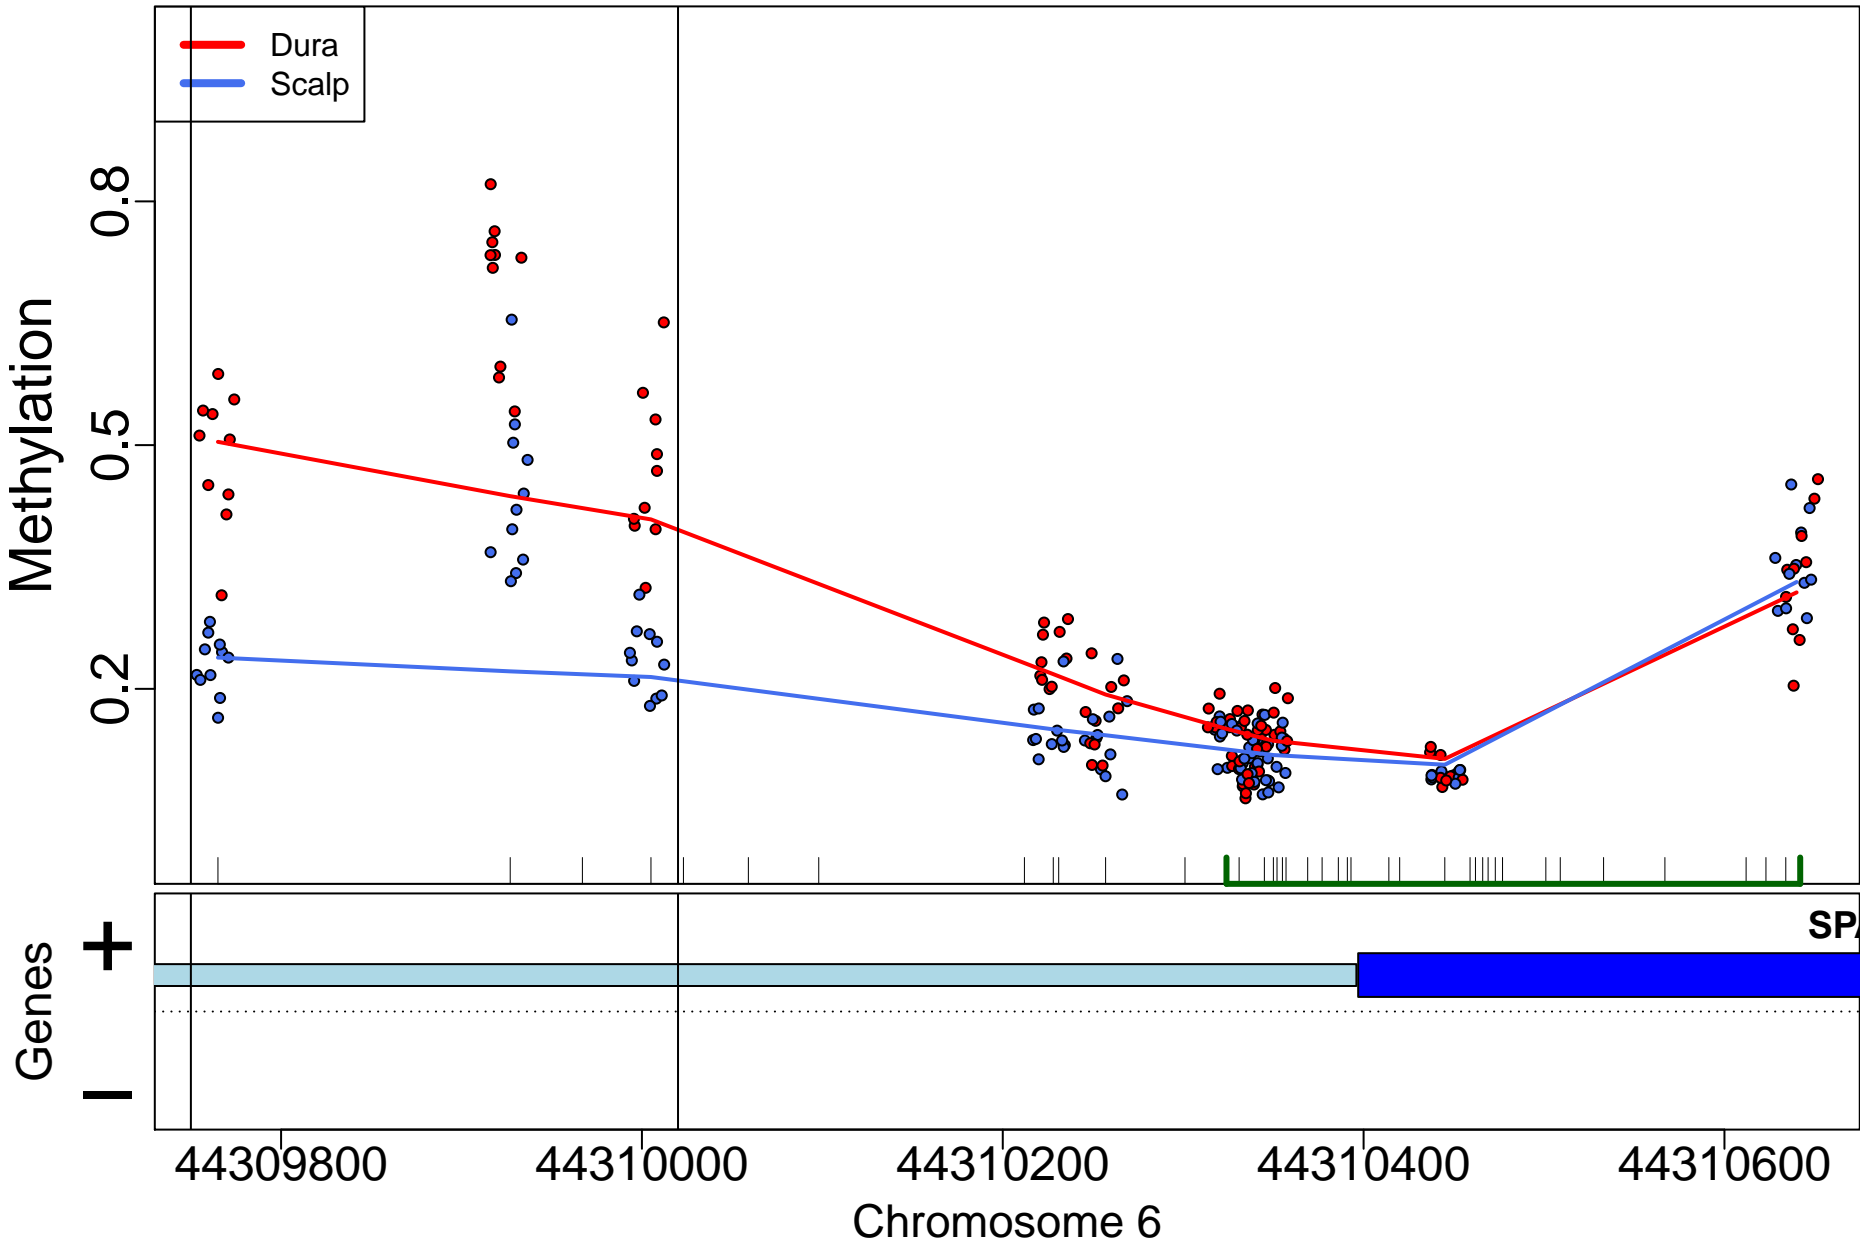

# CPT1A; 897bp from tss:promoter

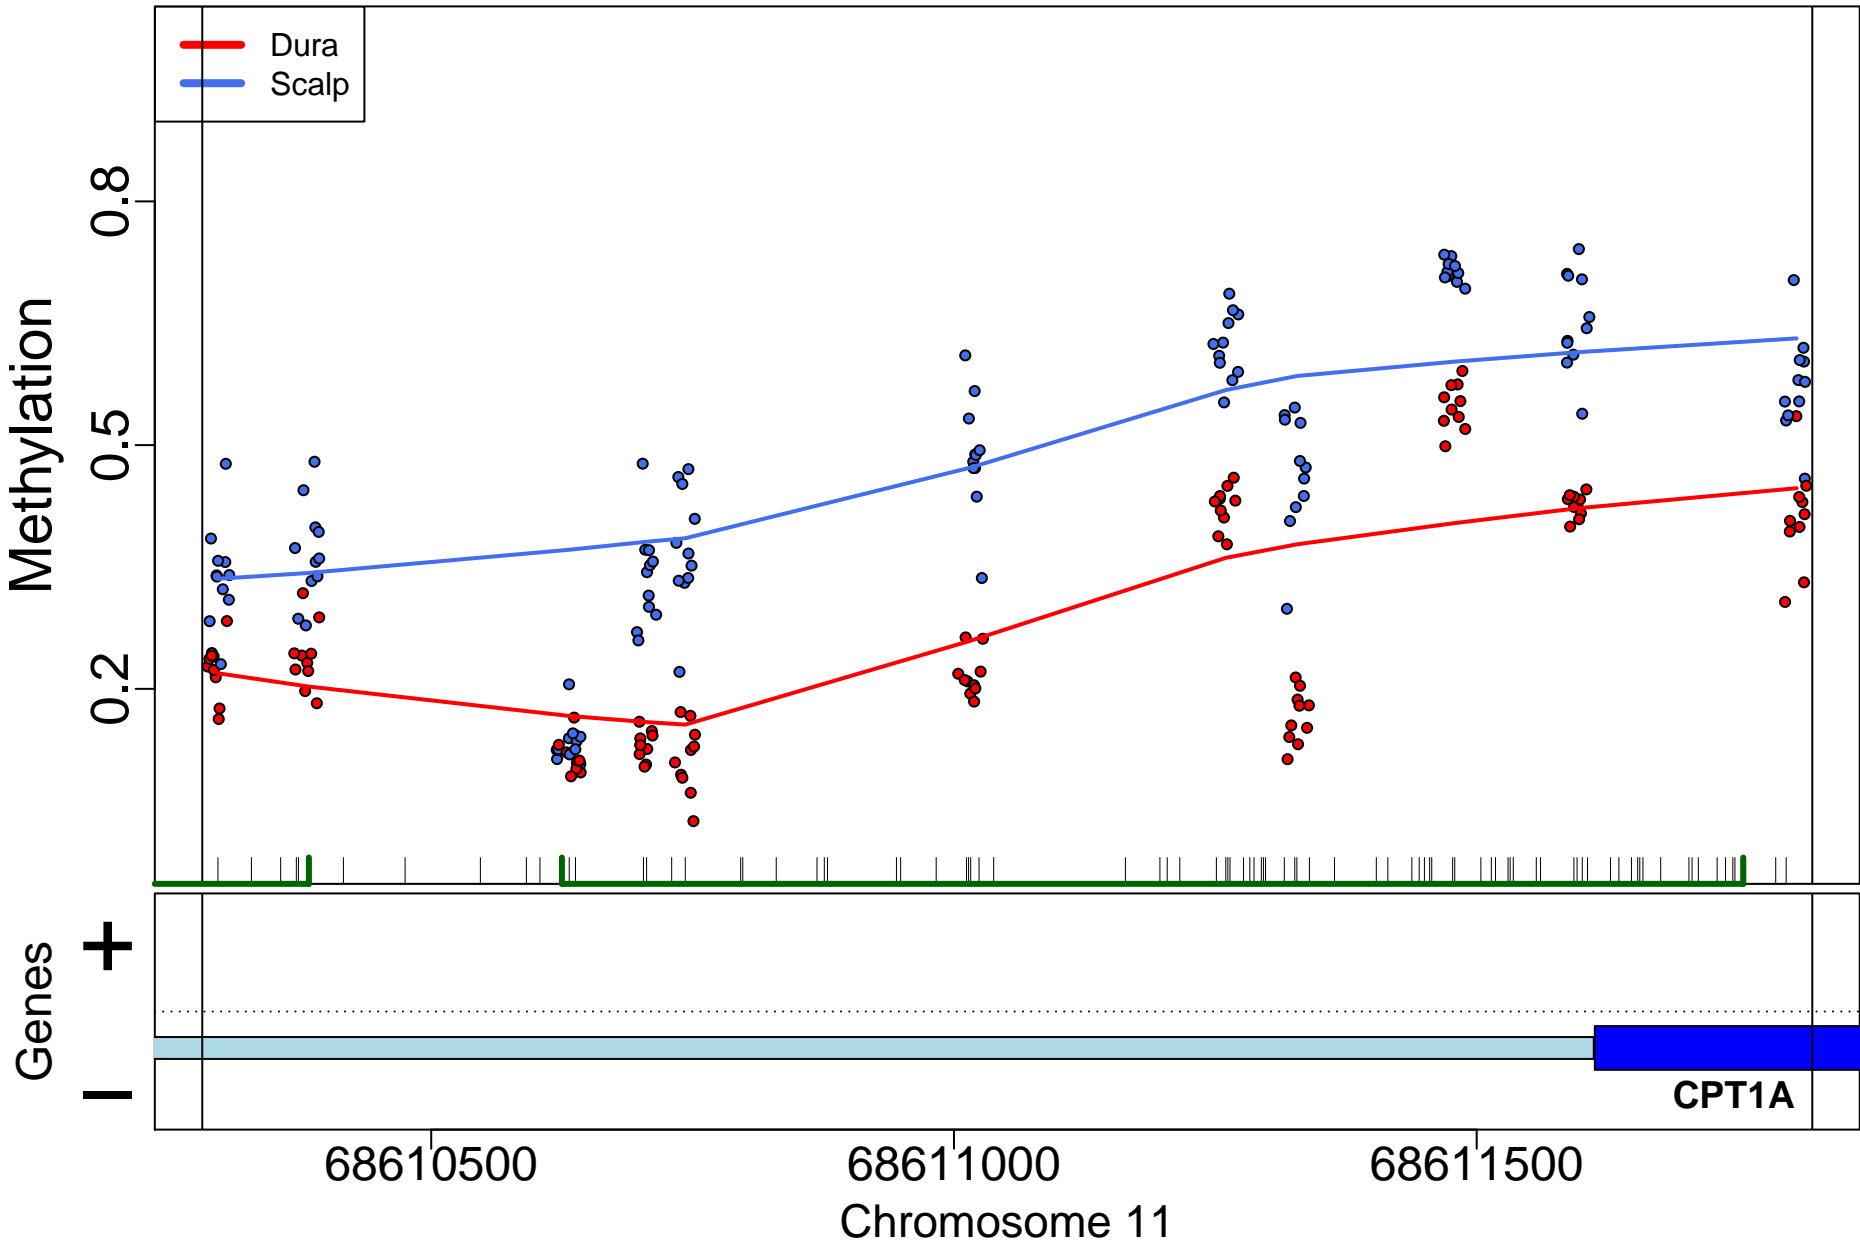



NR4A2; 0bp from tss:overlaps 5'

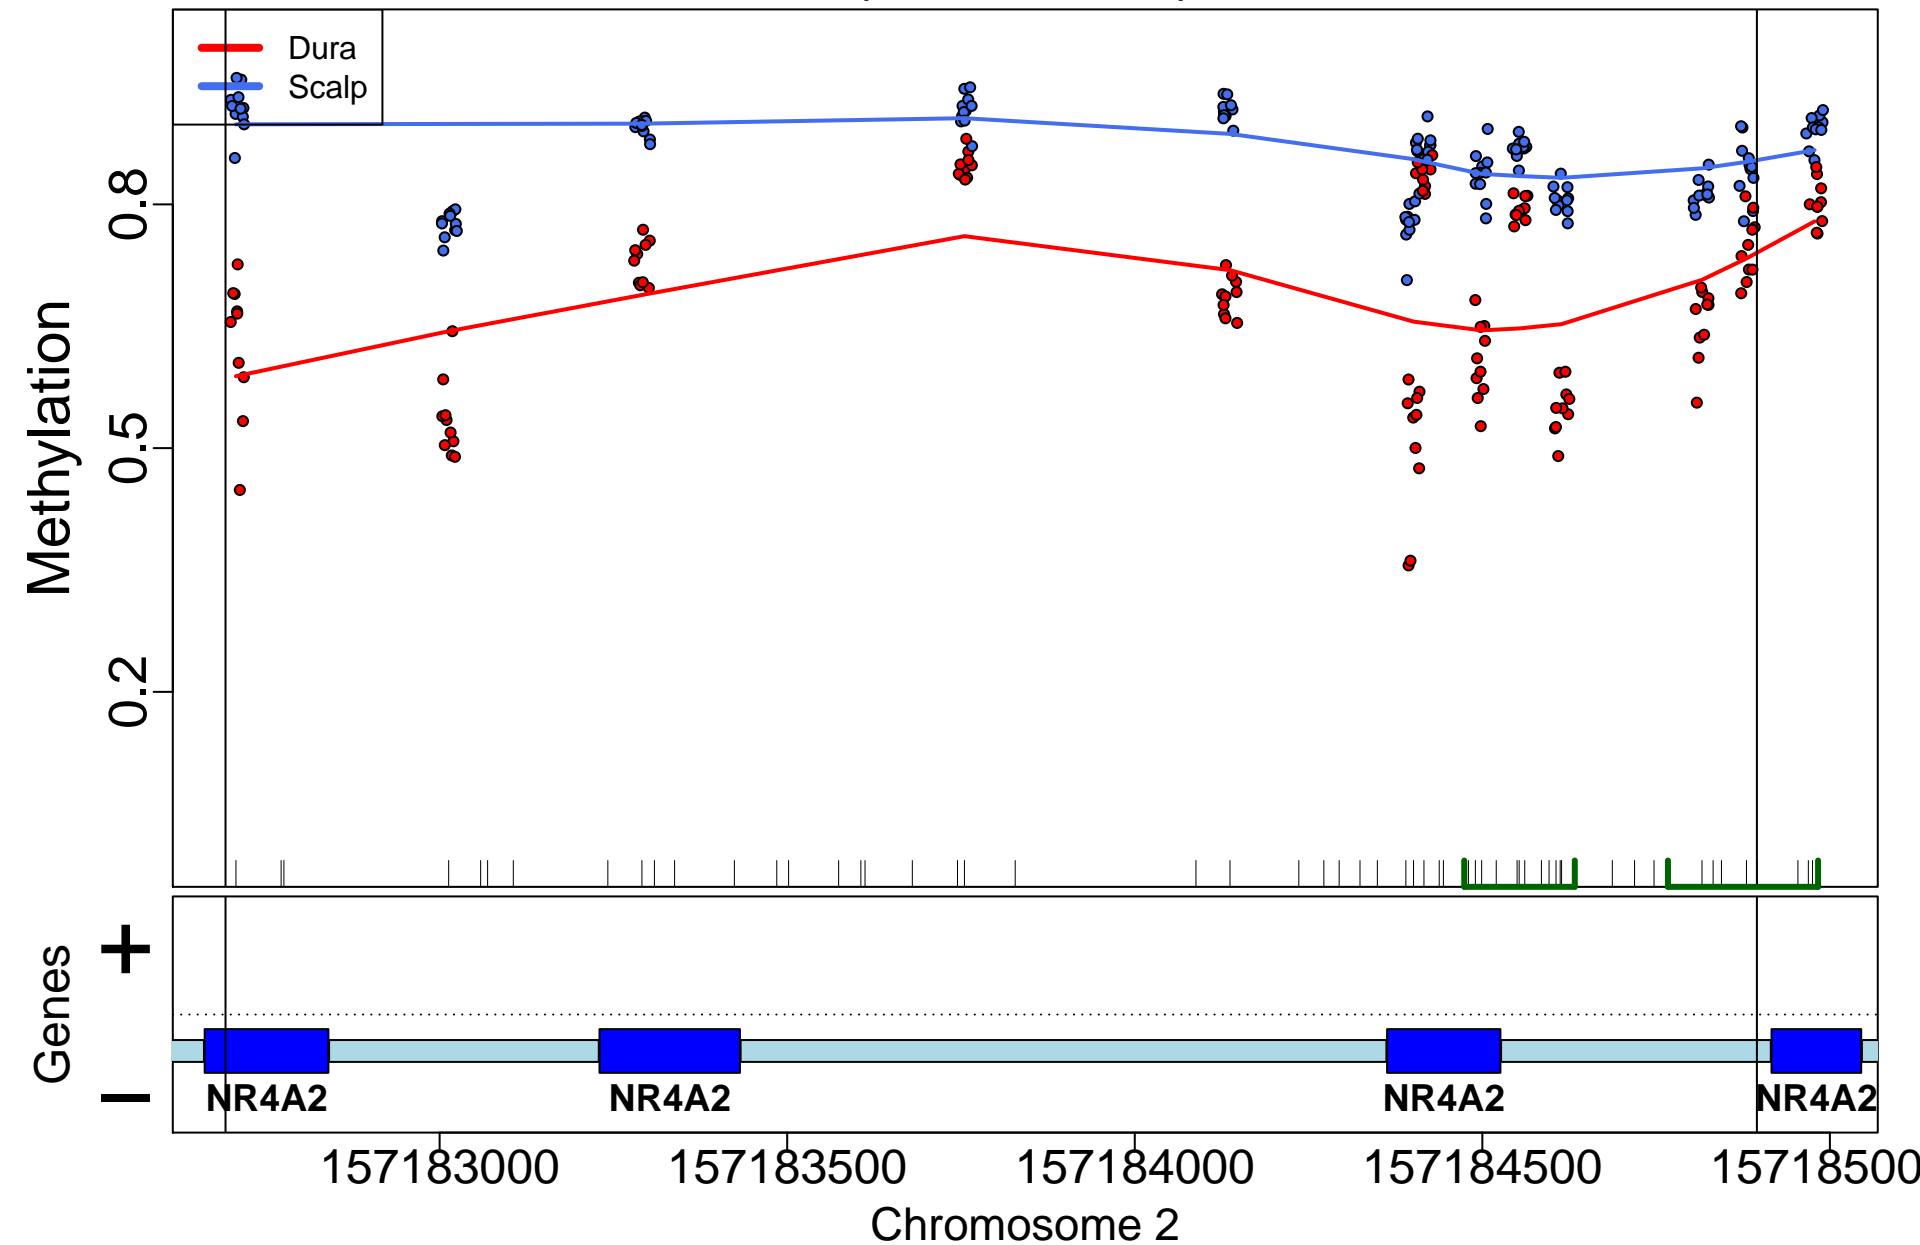

TBCD; 53095bp from tss:inside intron

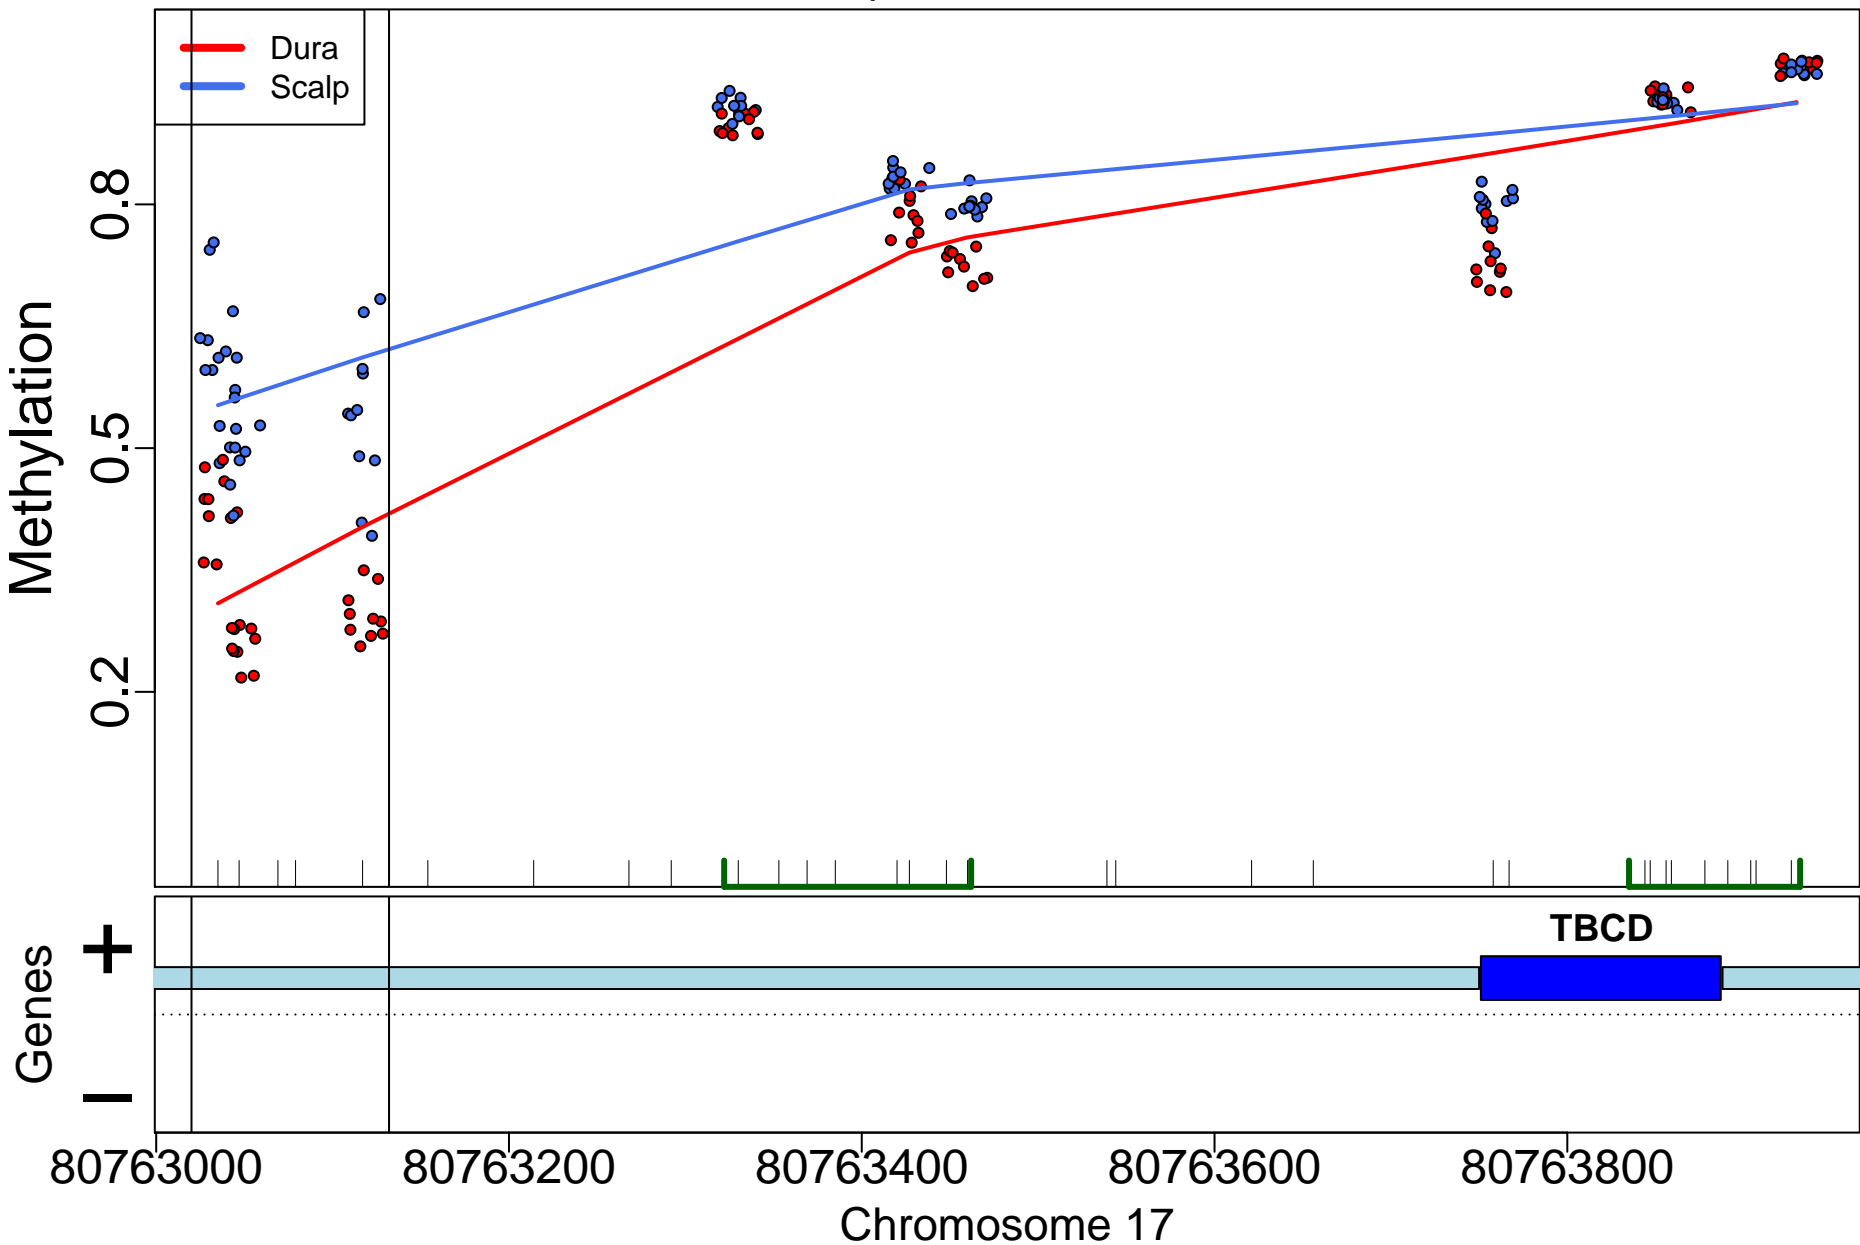

PBK; 286bp from tss:promoter

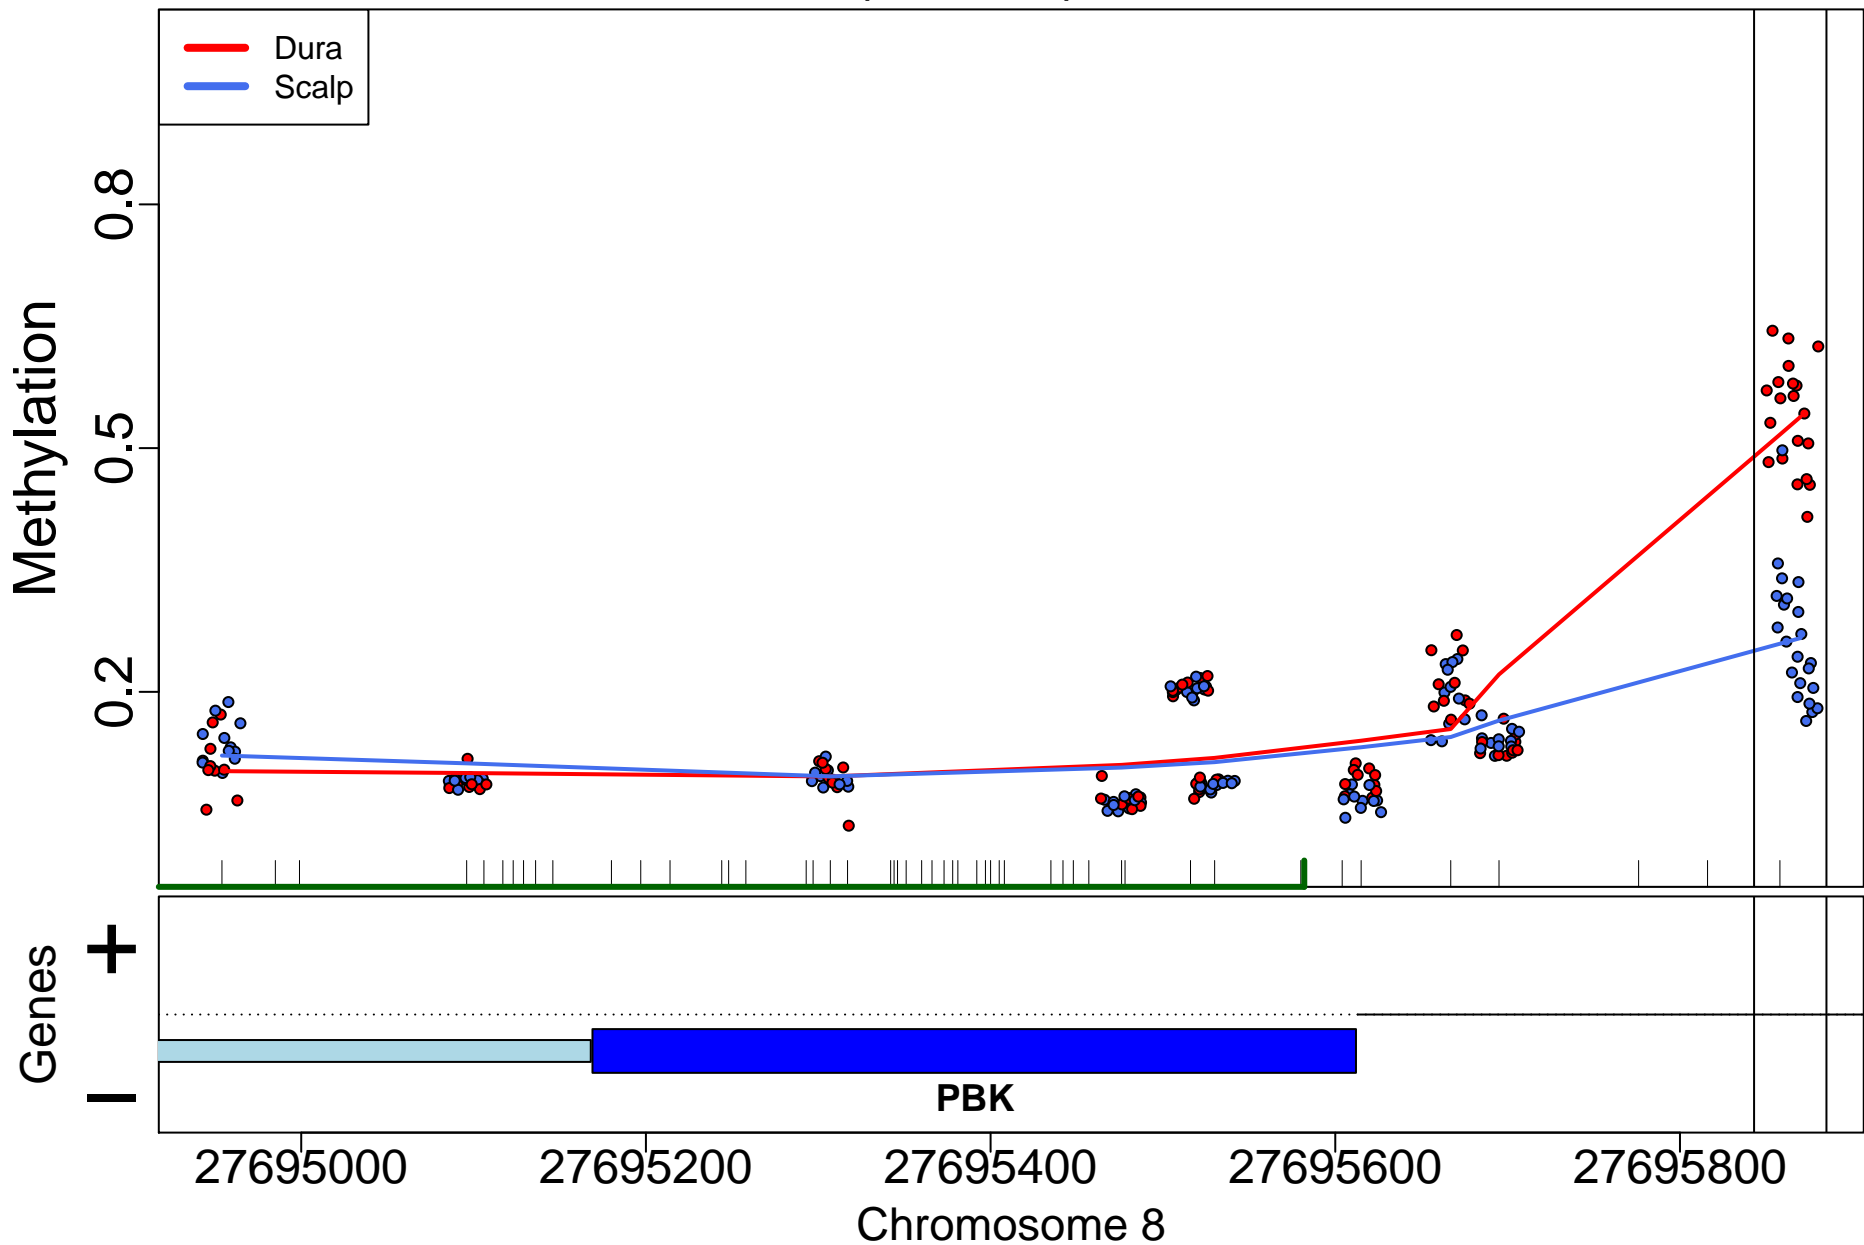

MSRA; 309562bp from tss:inside intron

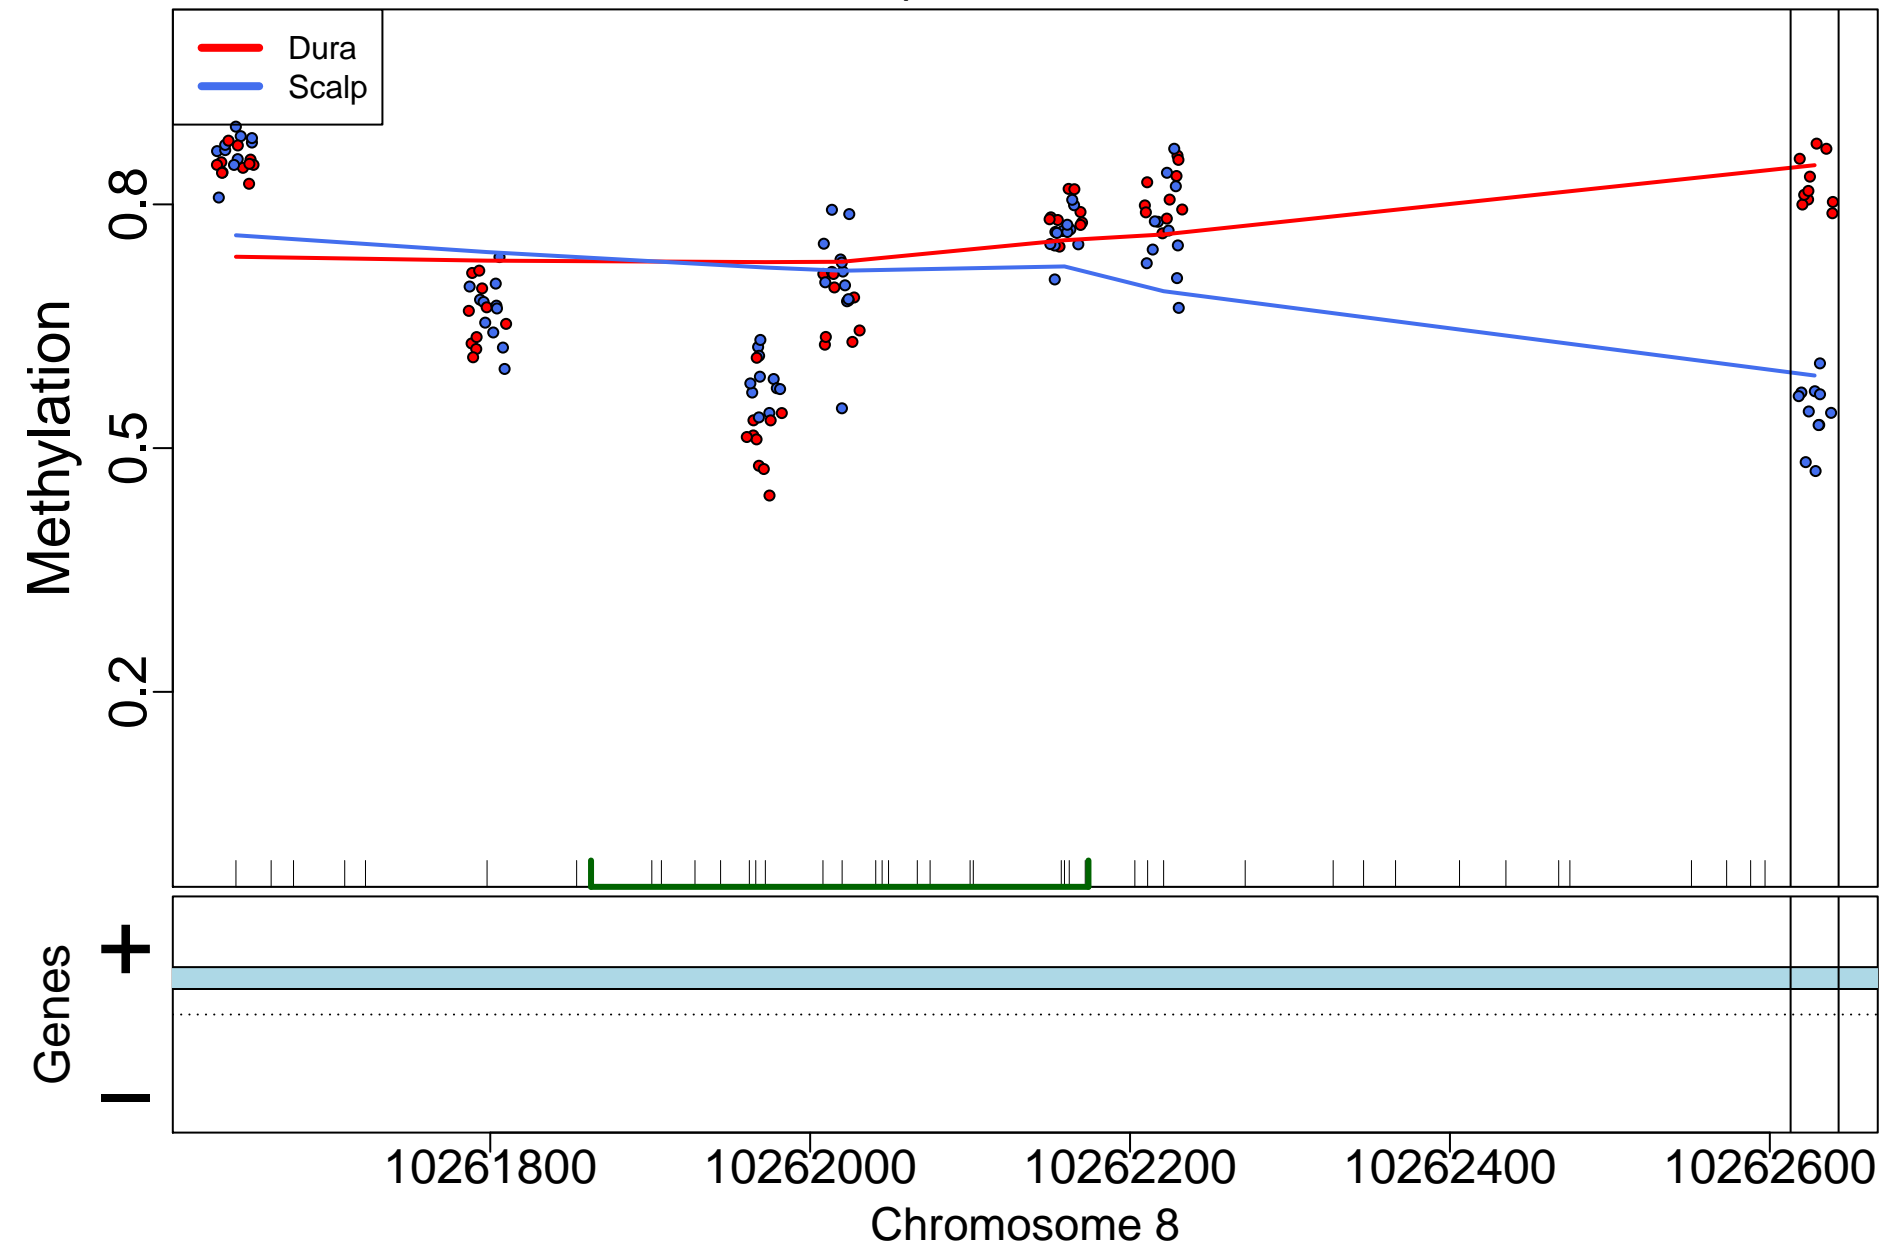

RASA3; 0bp from tss:NA

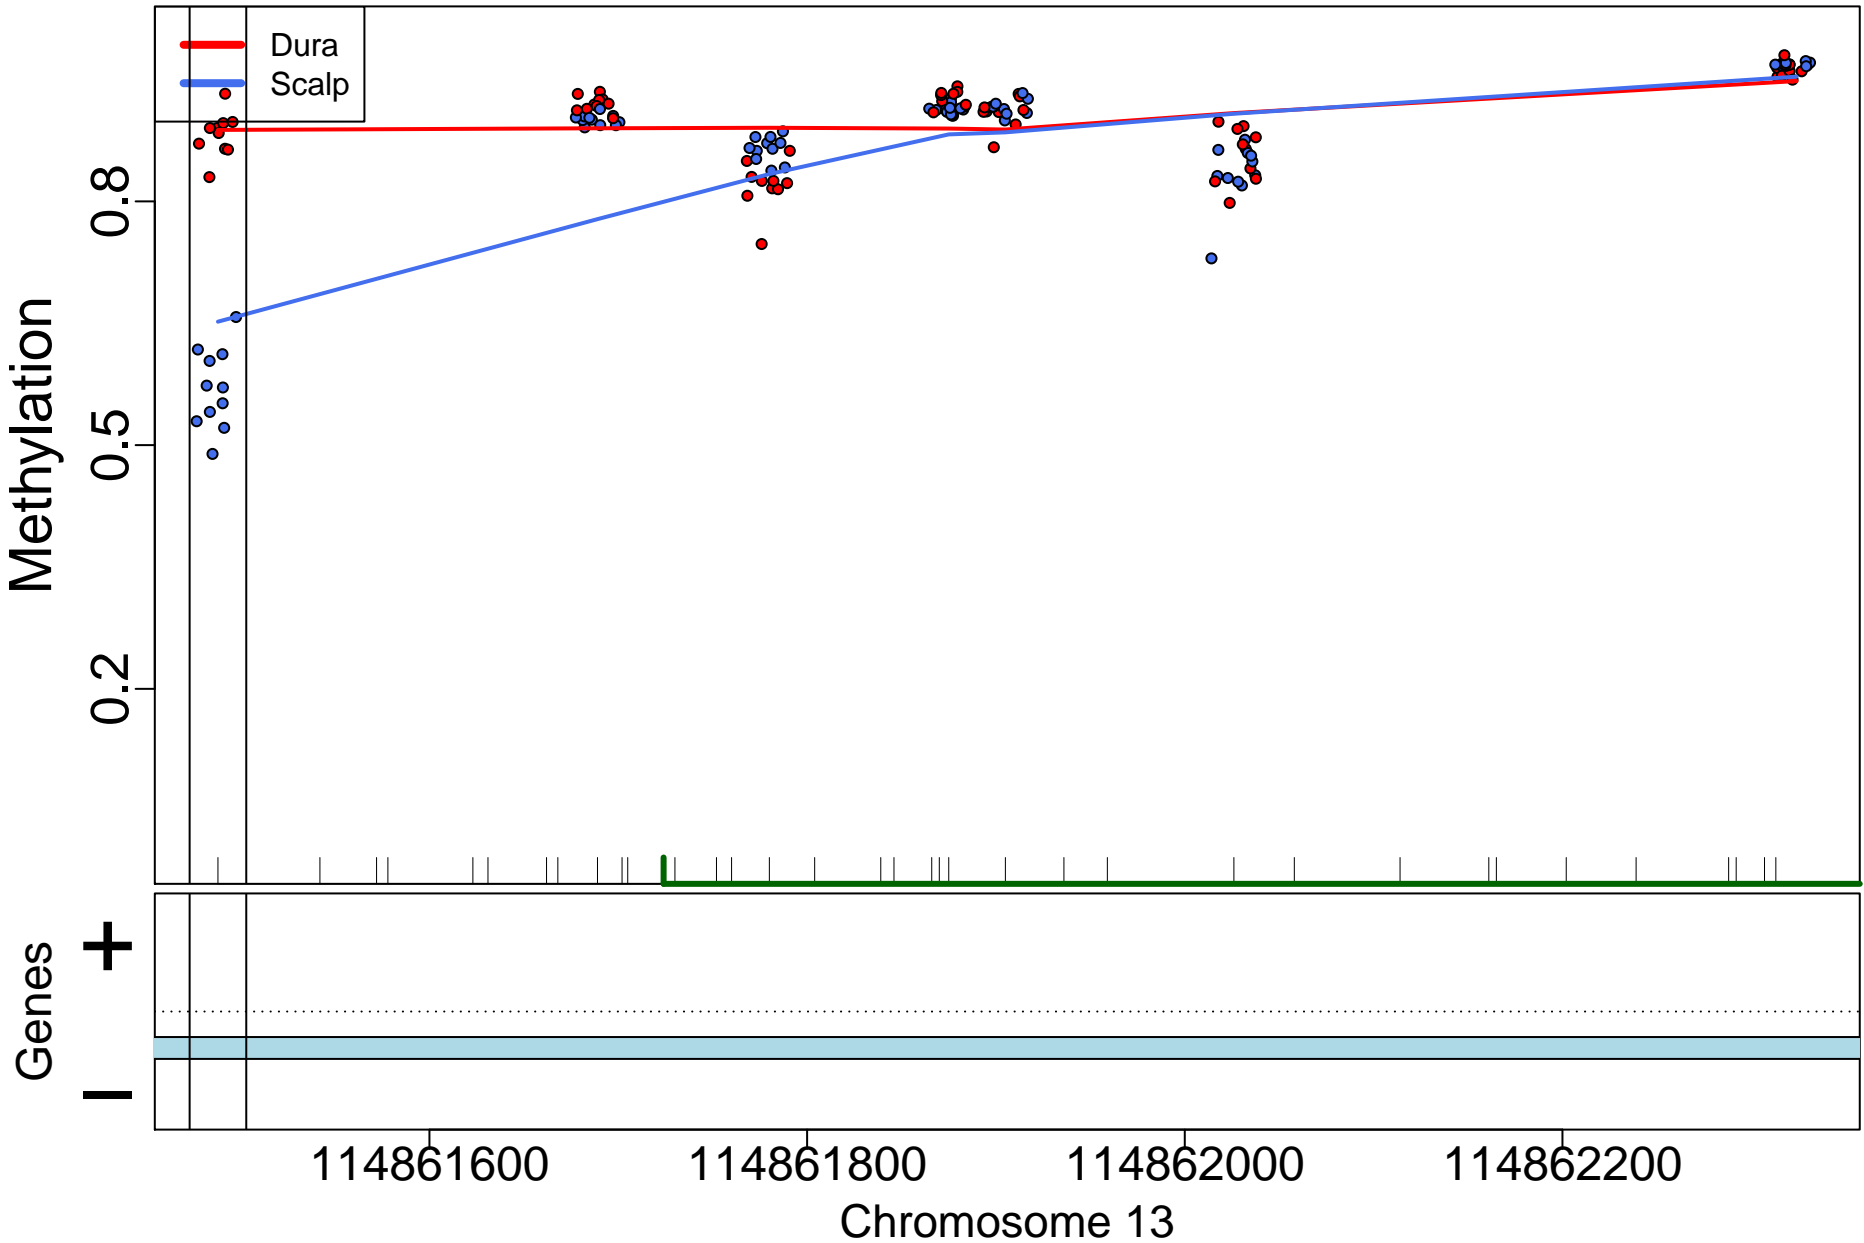

PCSK9; 0bp from tss:NA

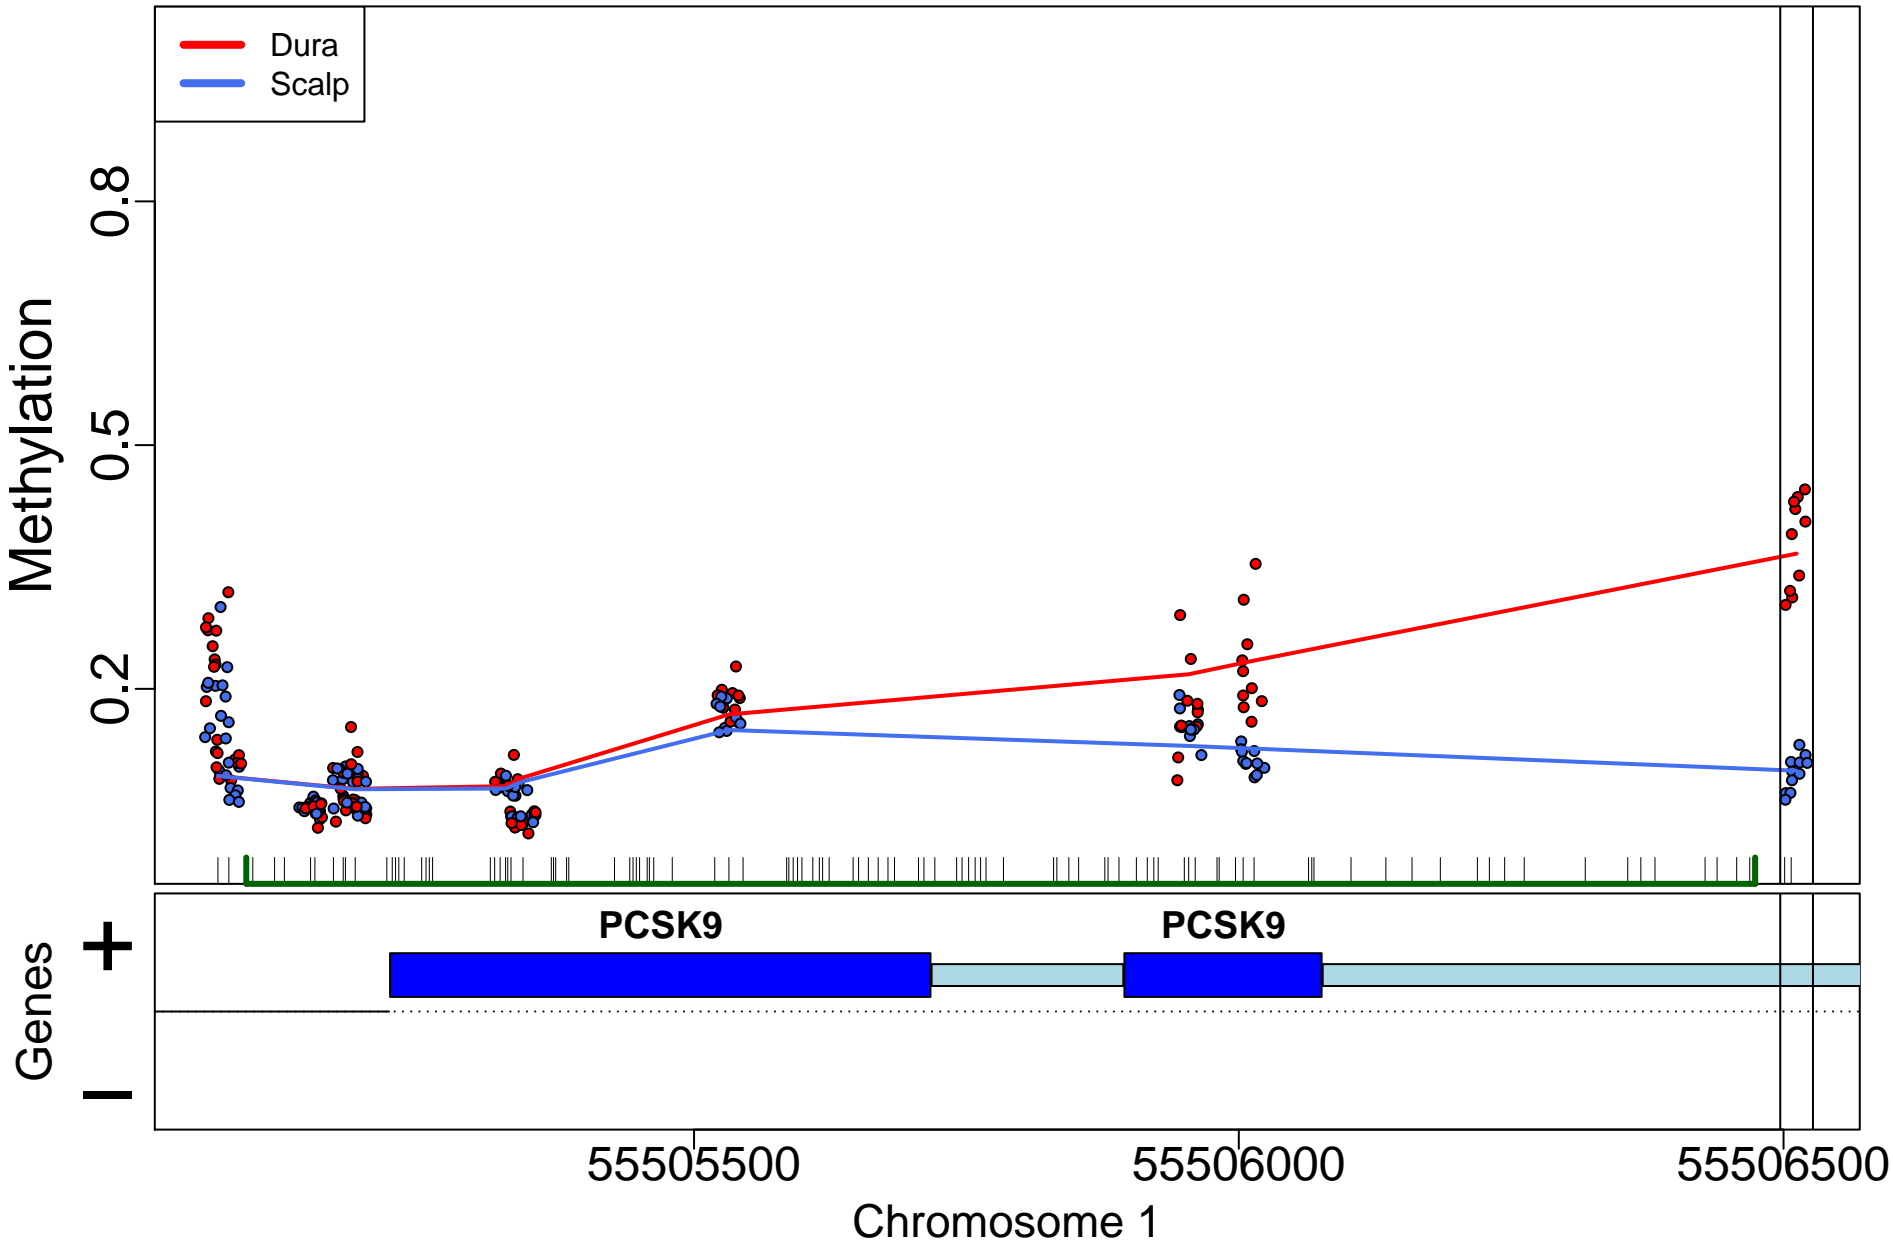

## SEMA4C; 9613bp from tss:inside exon

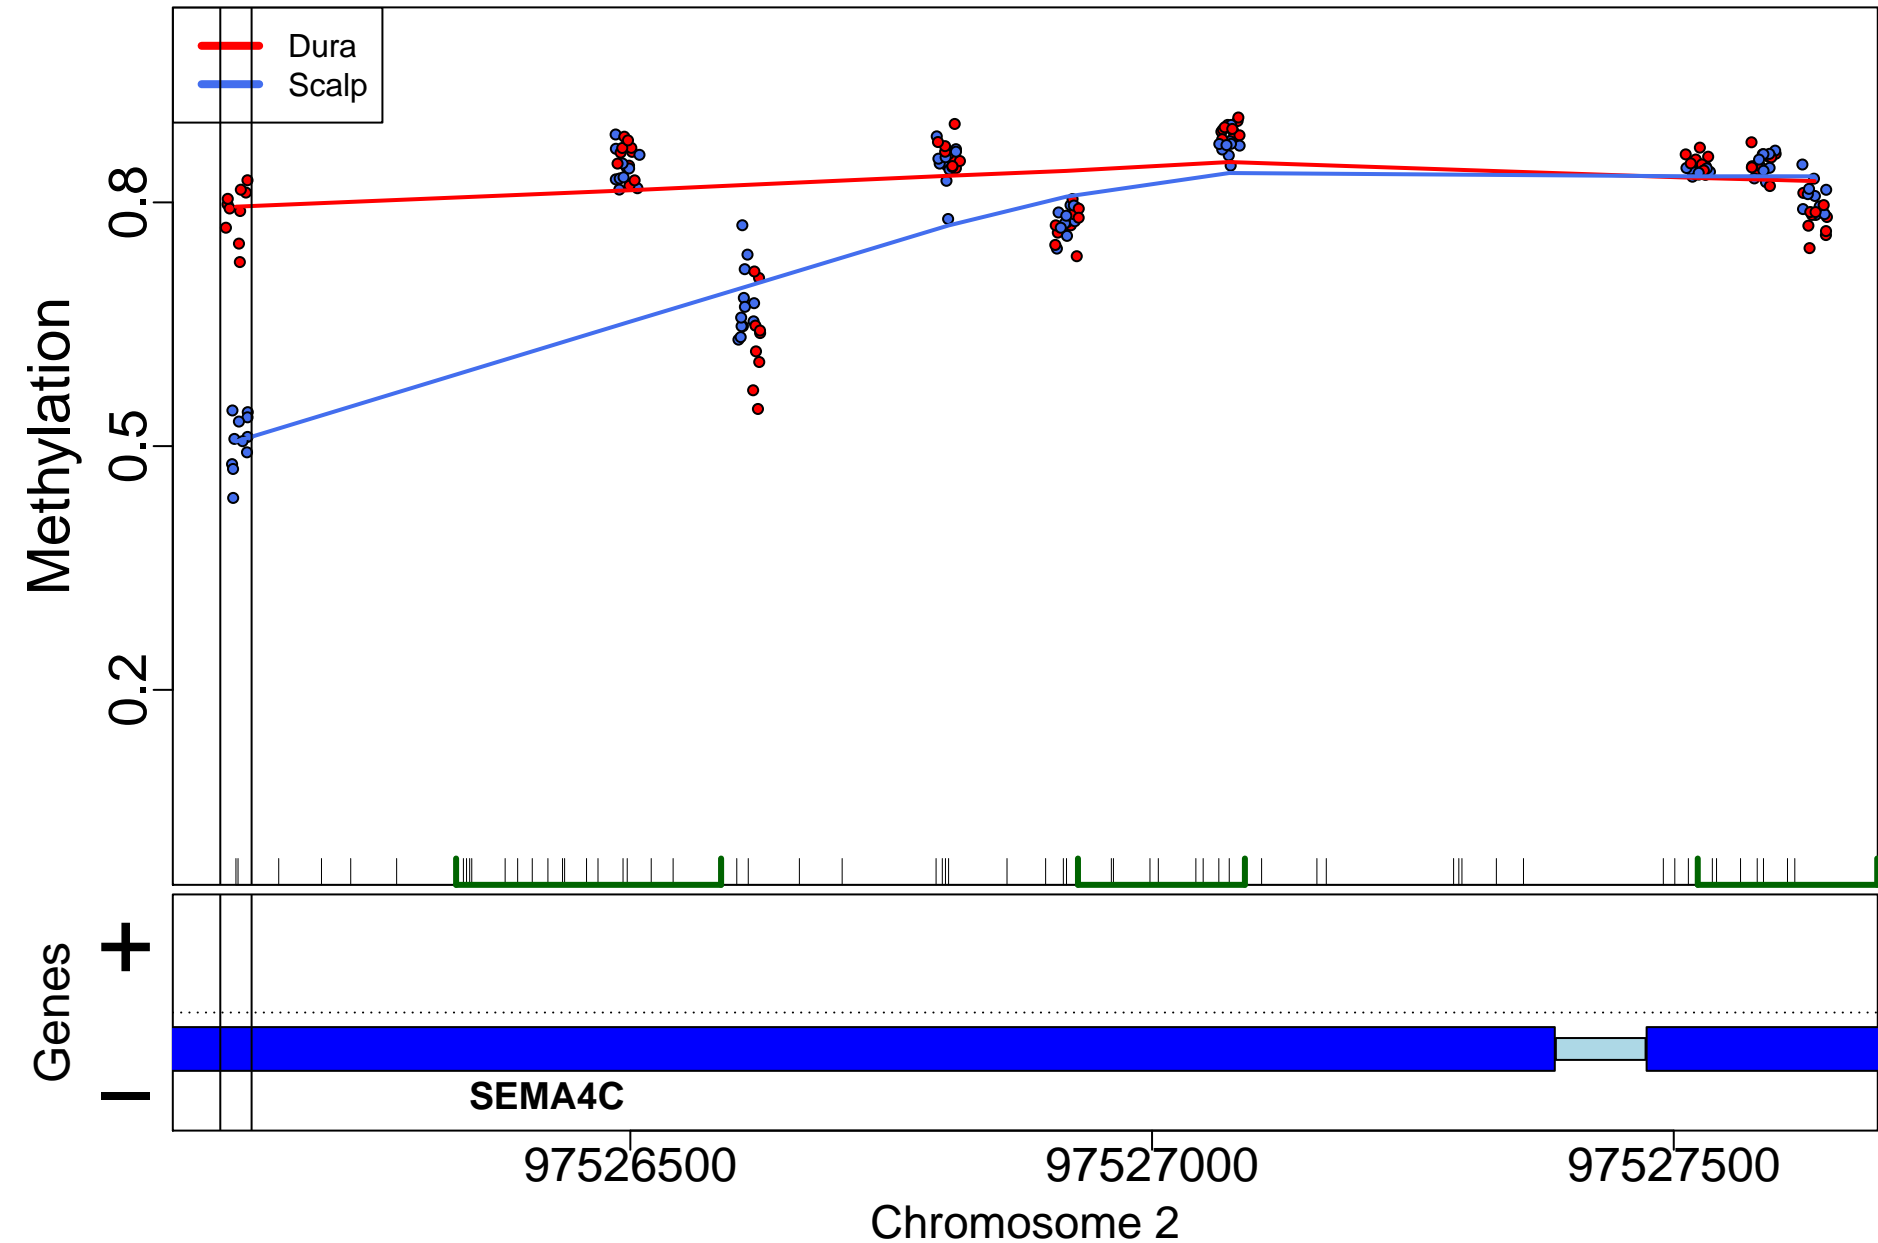

# CPT1A; 13852bp from tss:upstream

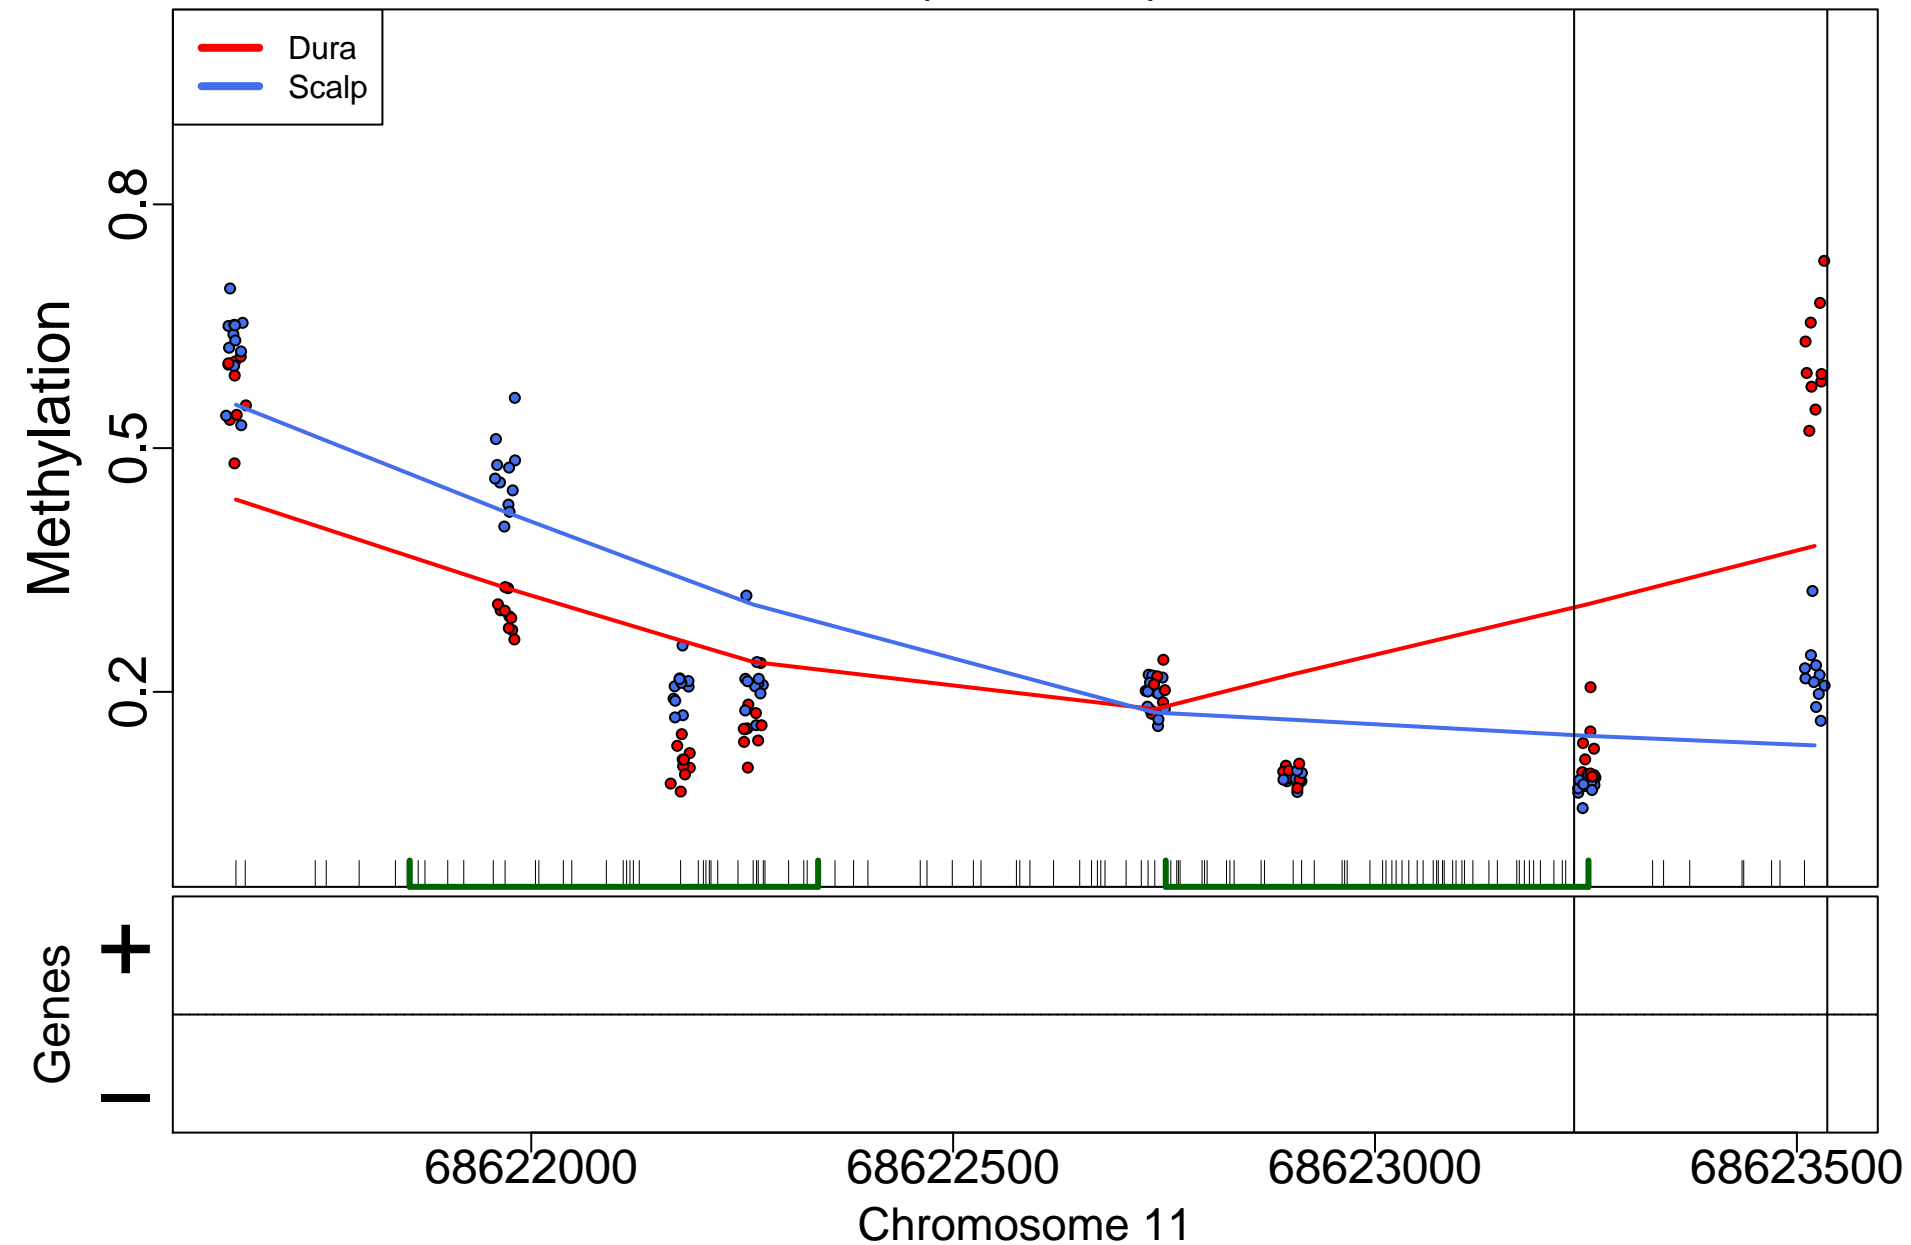





# ANKMY2; 0bp from tss:NA

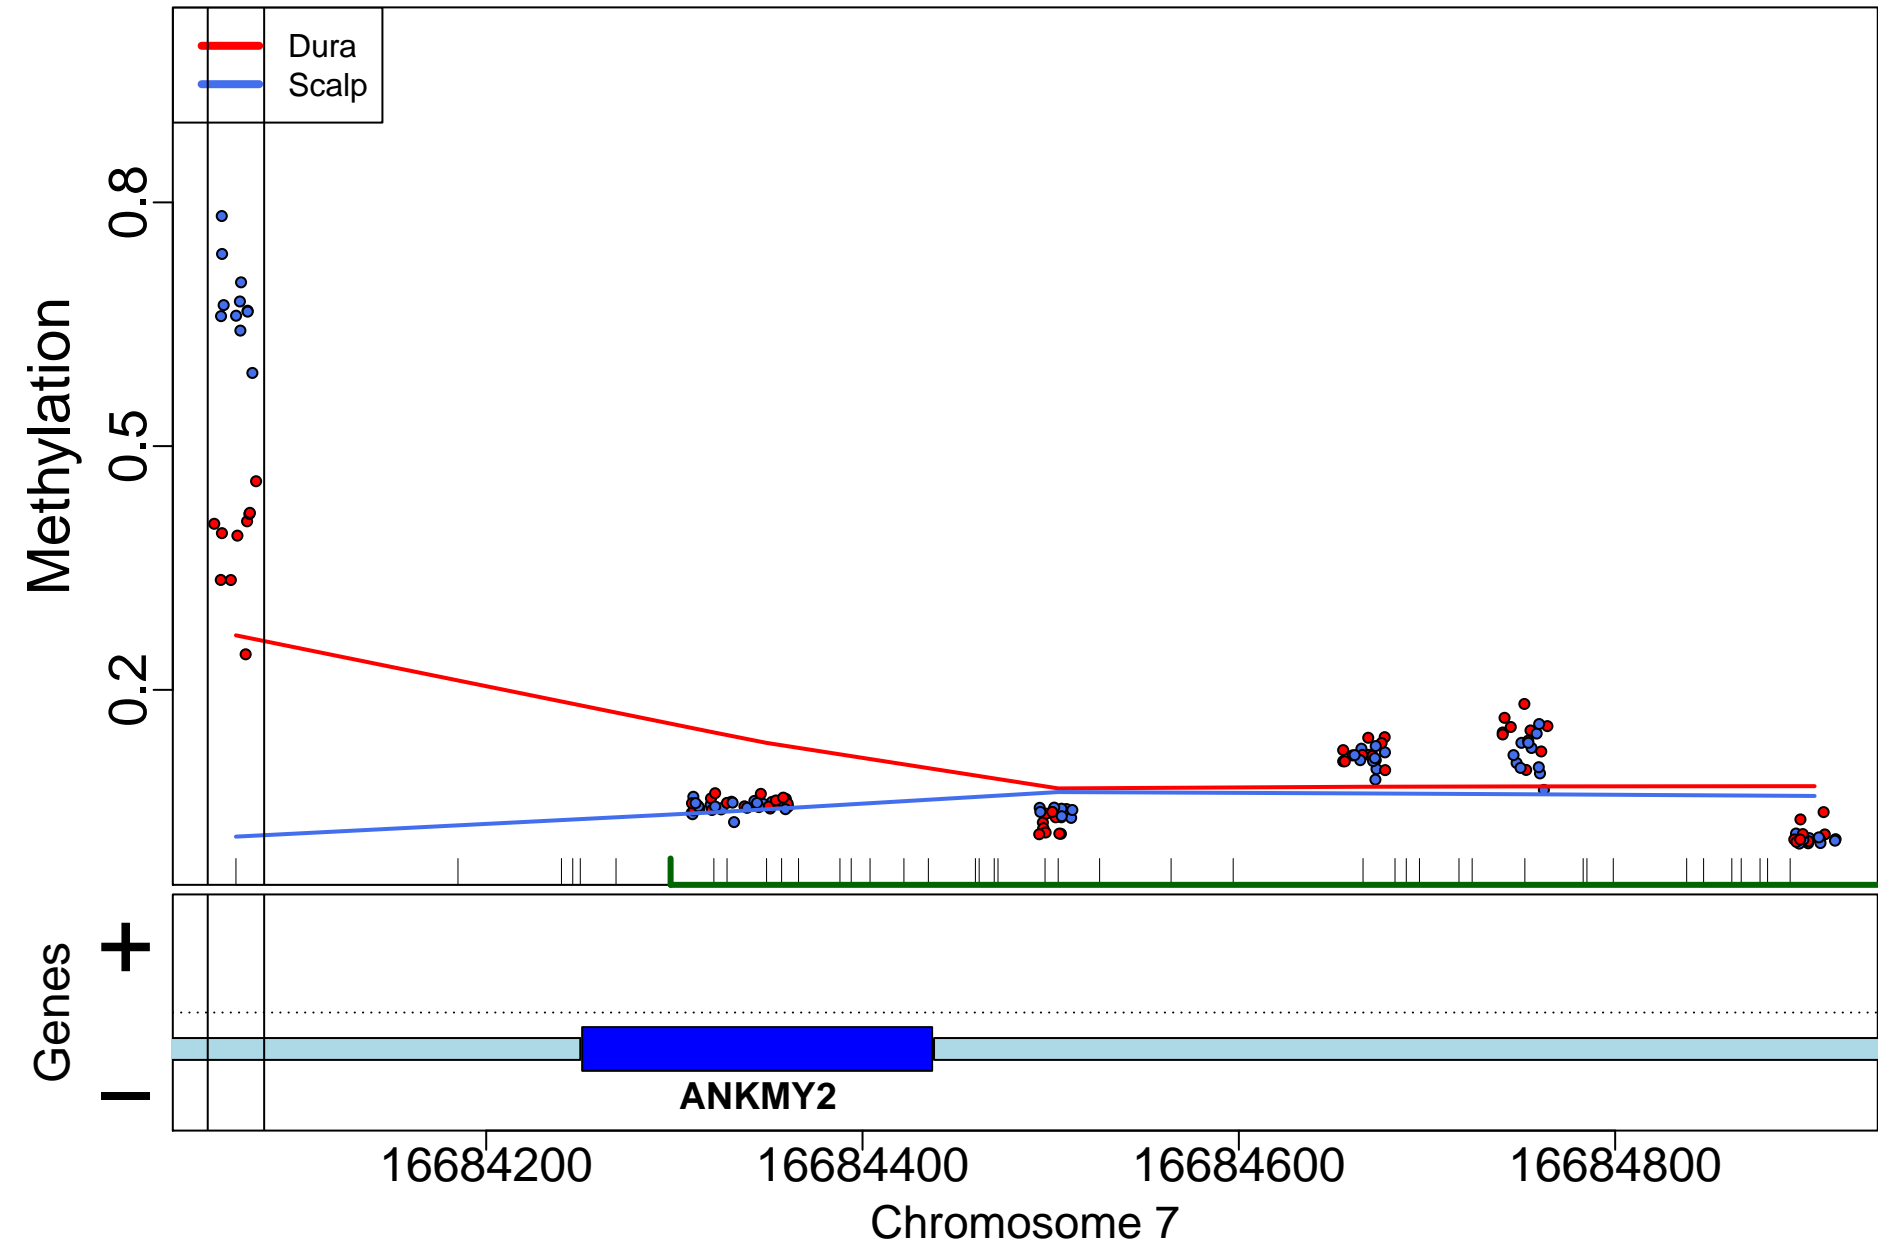

# EN1; 1946bp from tss:inside intron

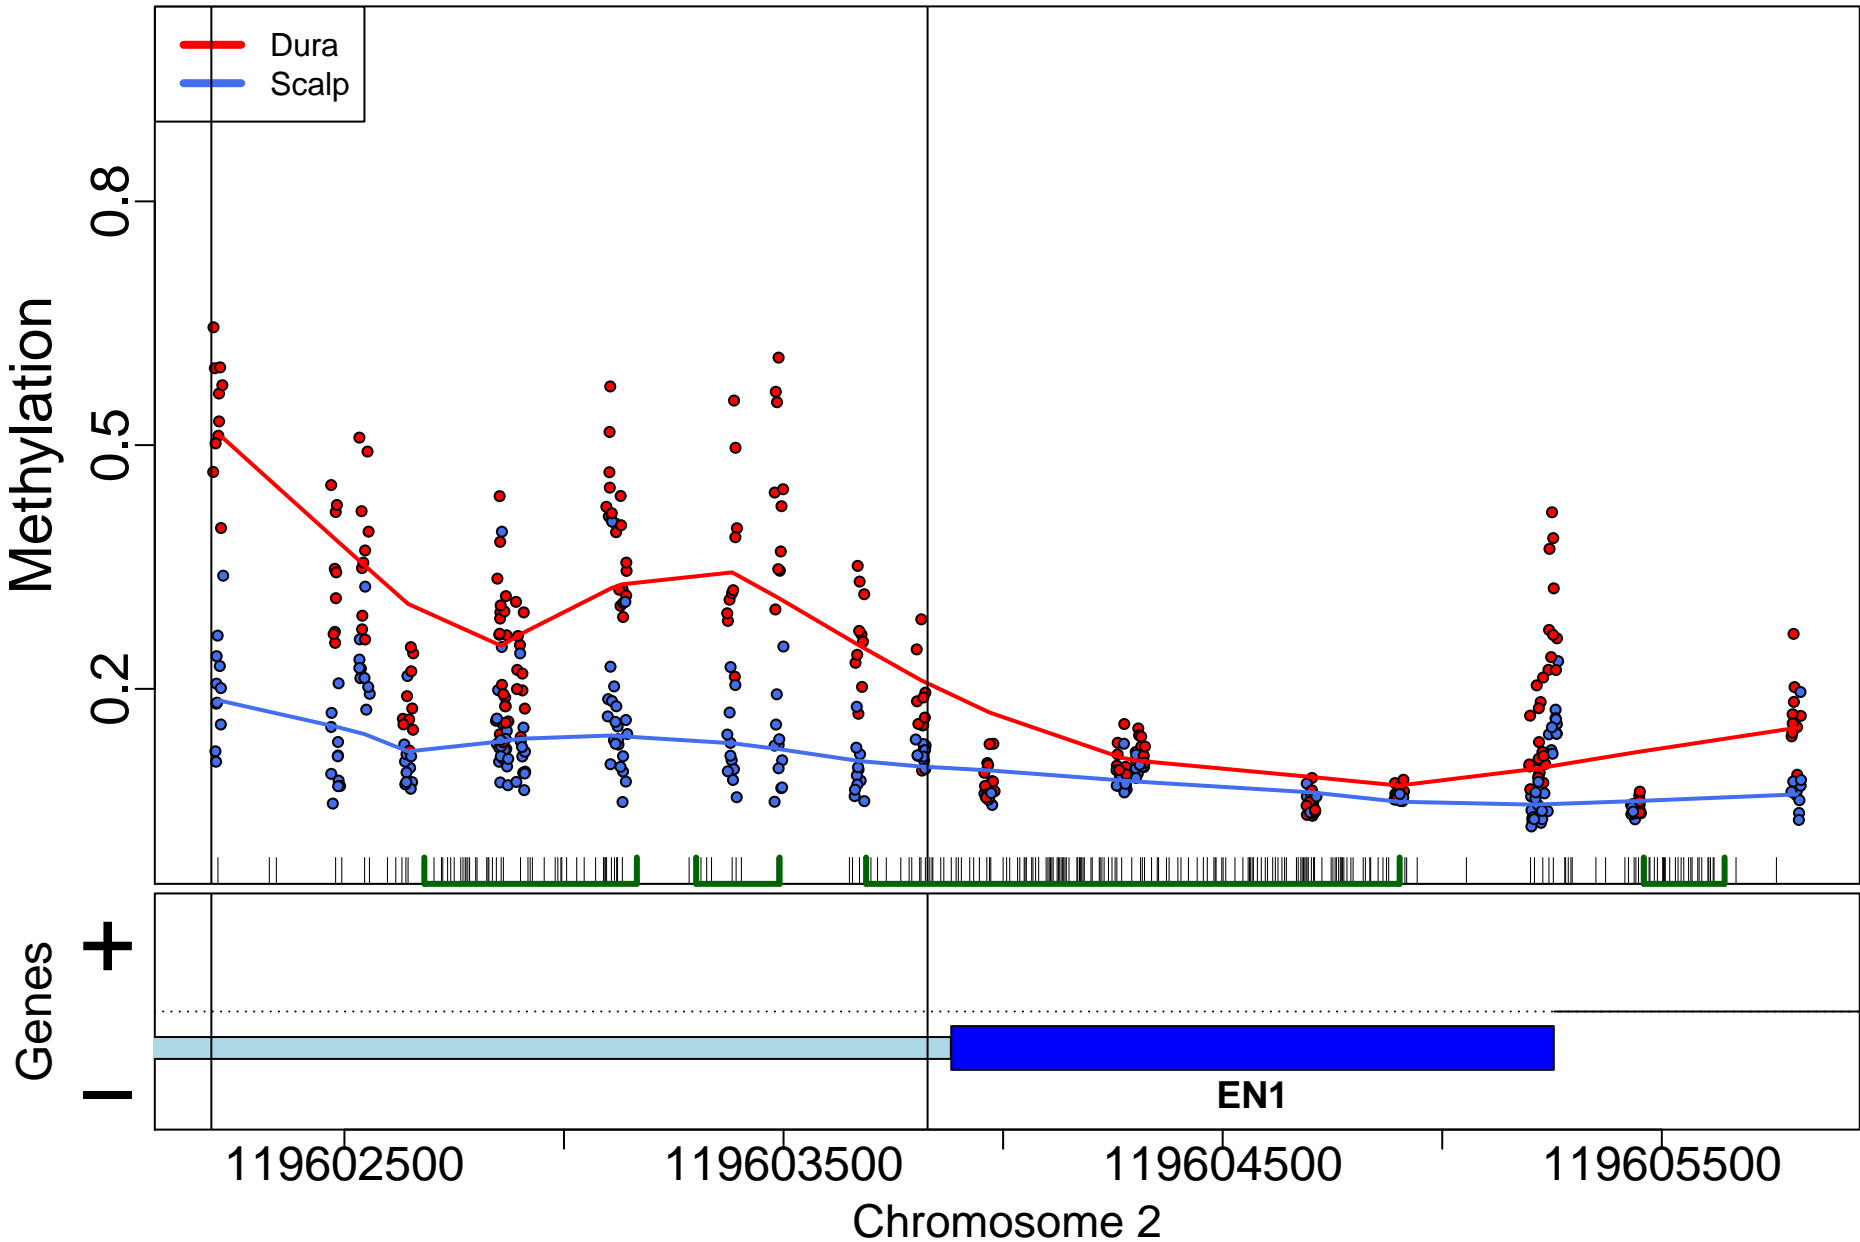

WDR27; 53735bp from tss:inside intron

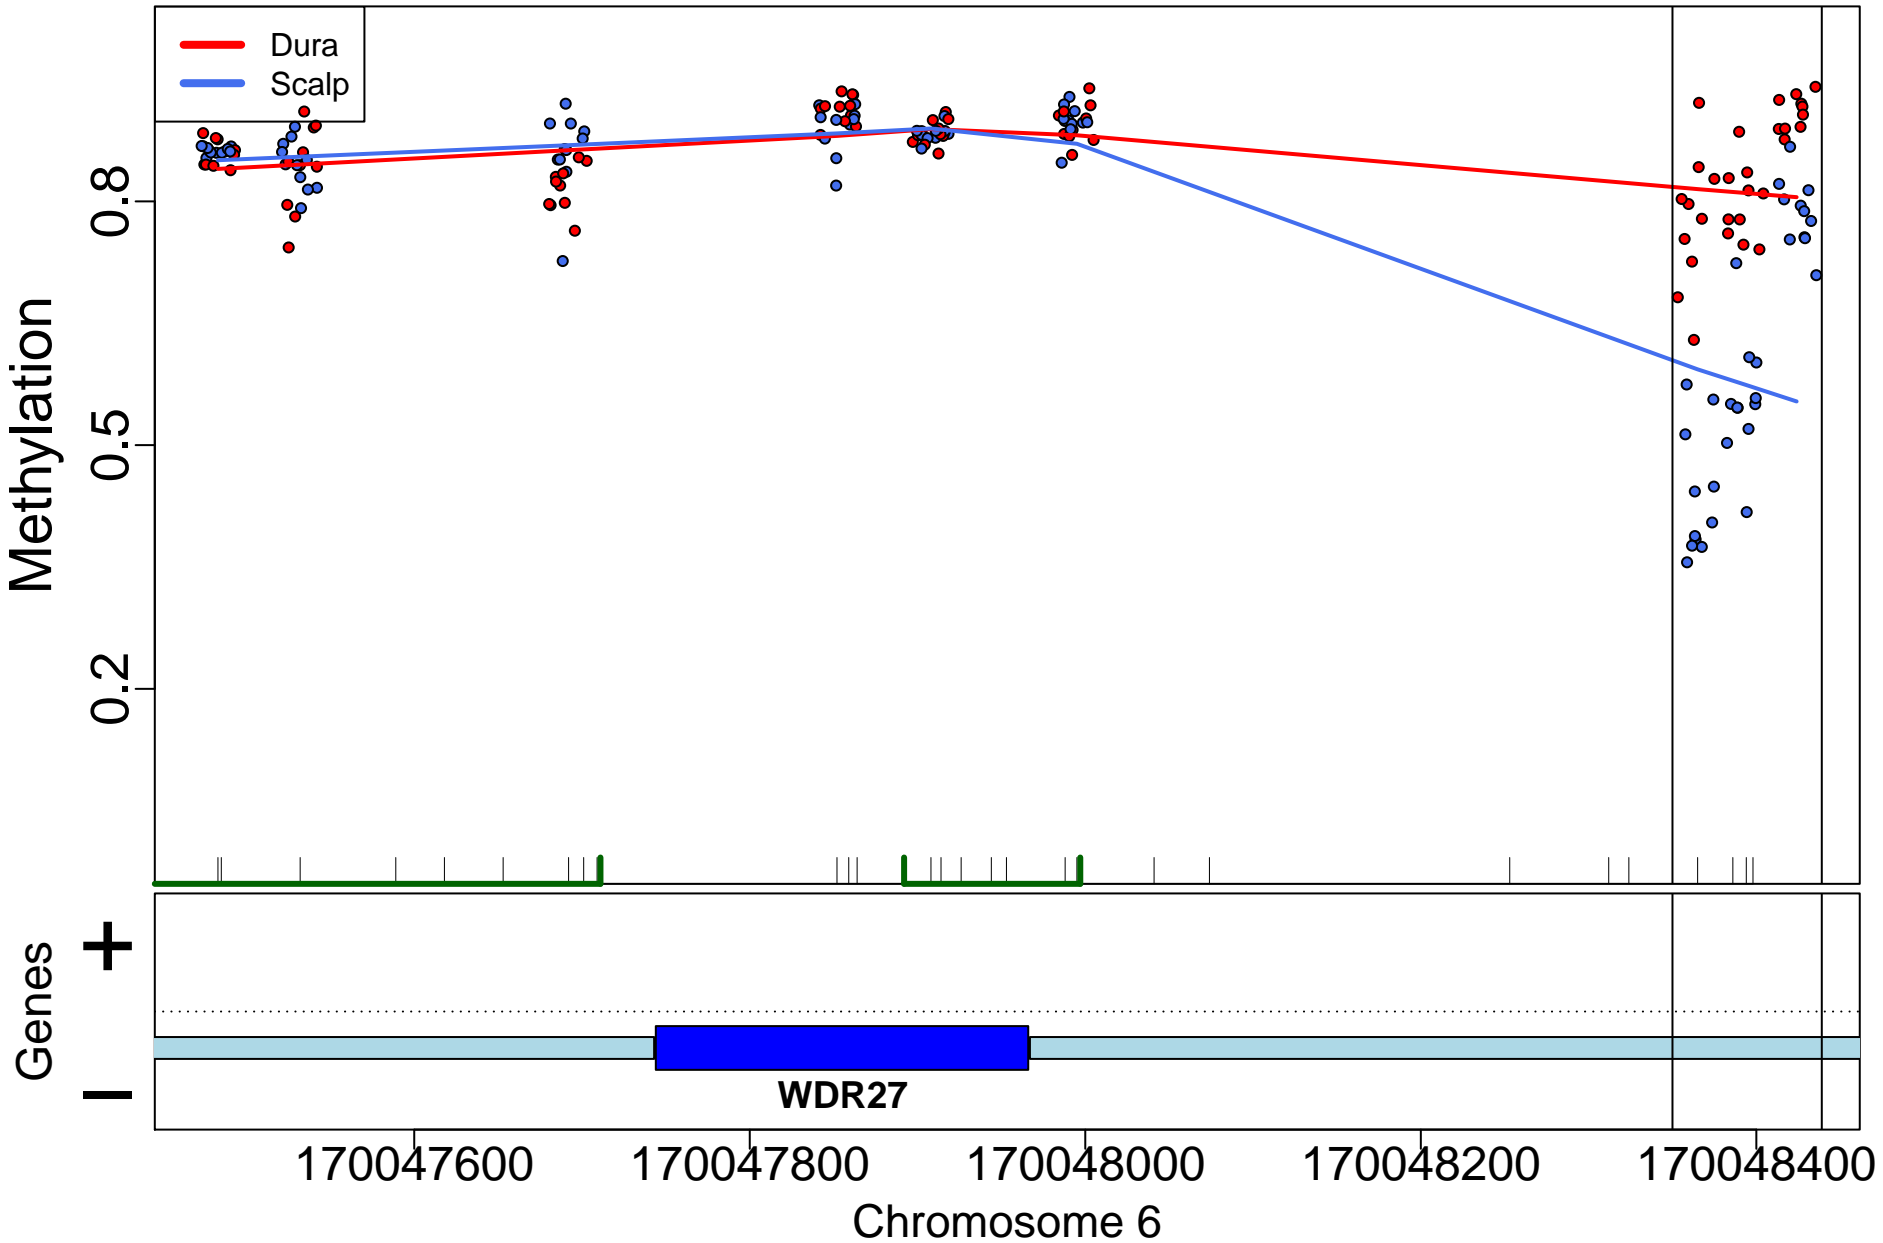

MCPH1; 156129bp from tss:inside intron

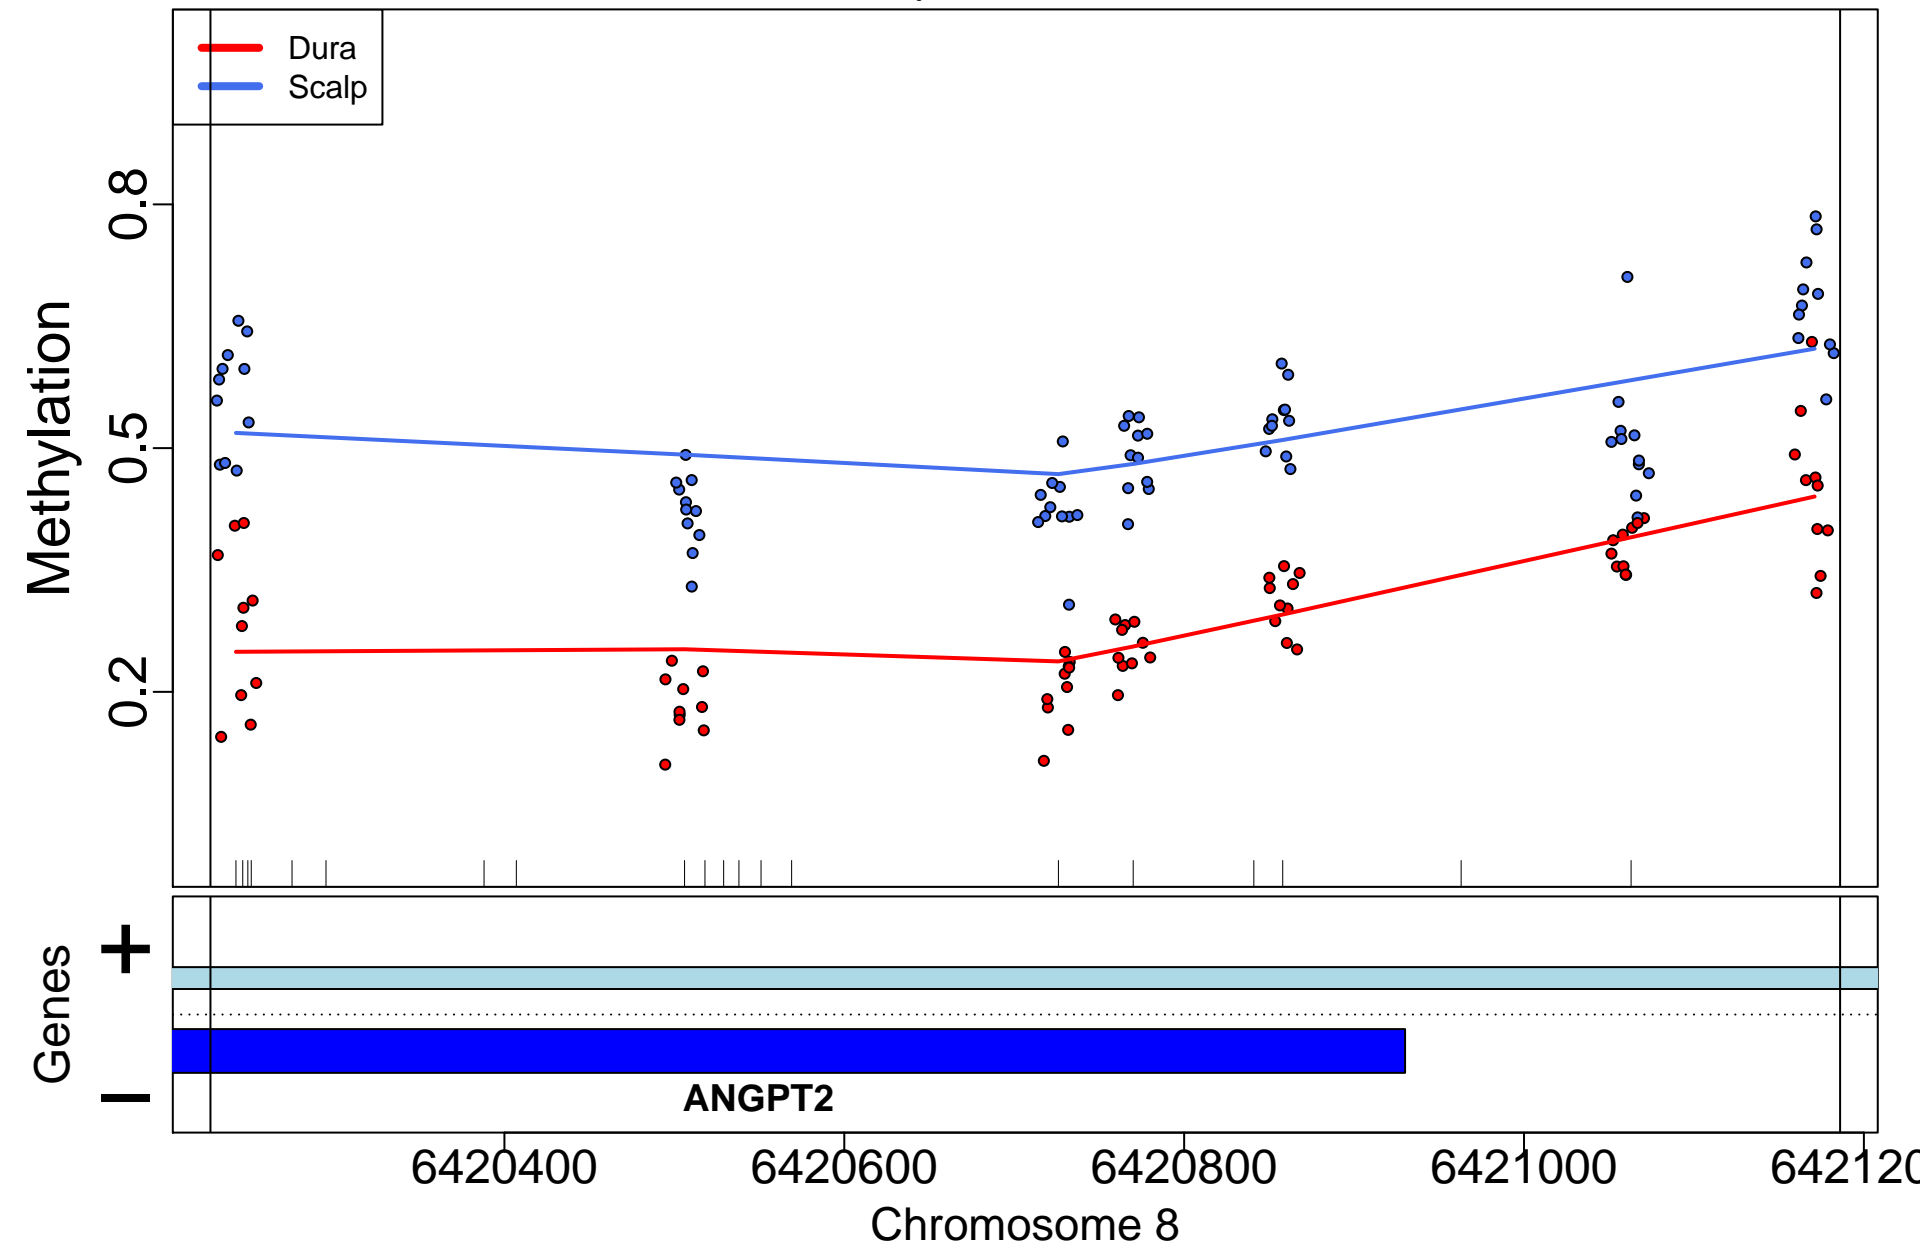

EPHB3; 21624bp from tss:downstream

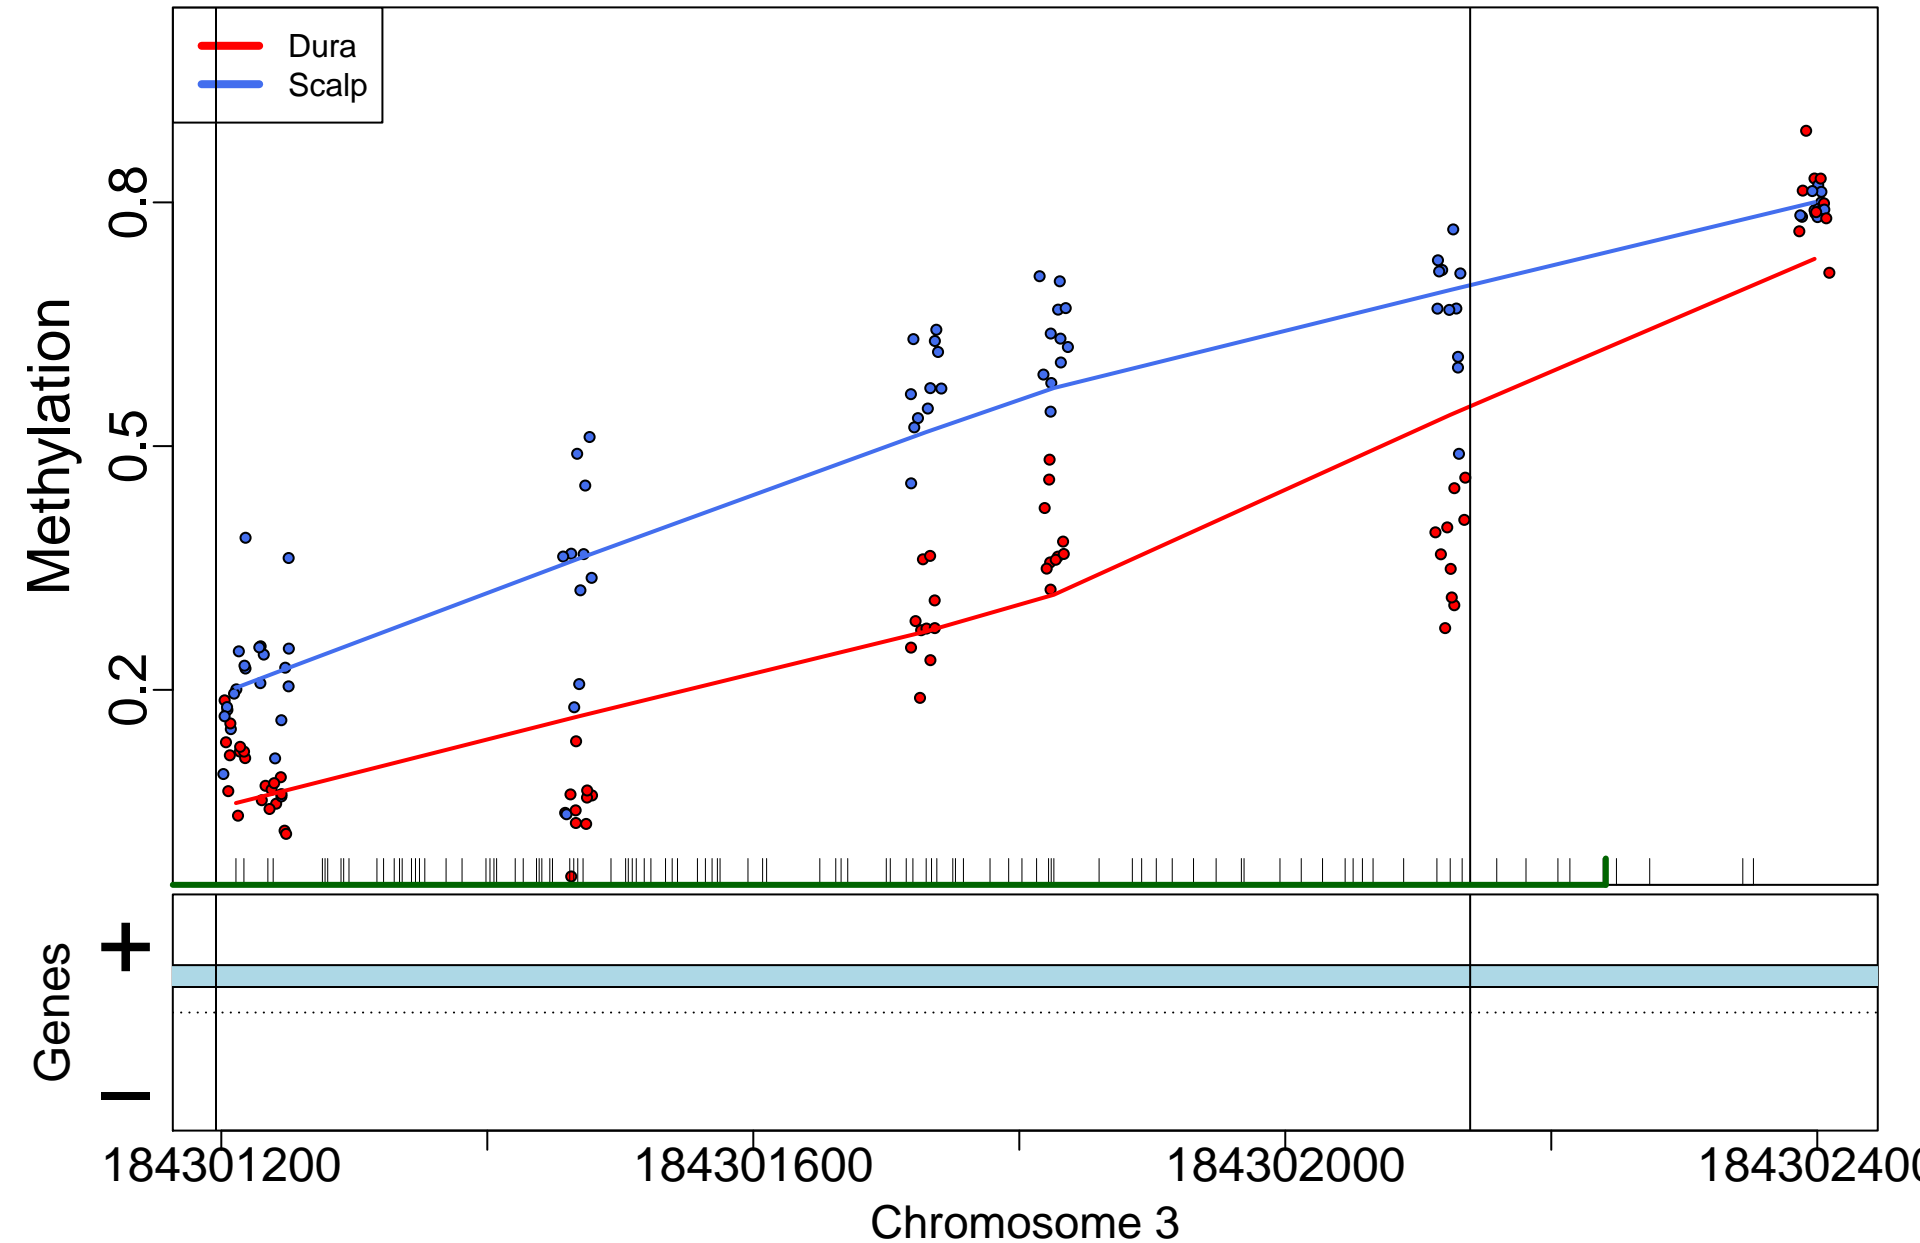

CDKN1A; 0bp from tss:overlaps 5'

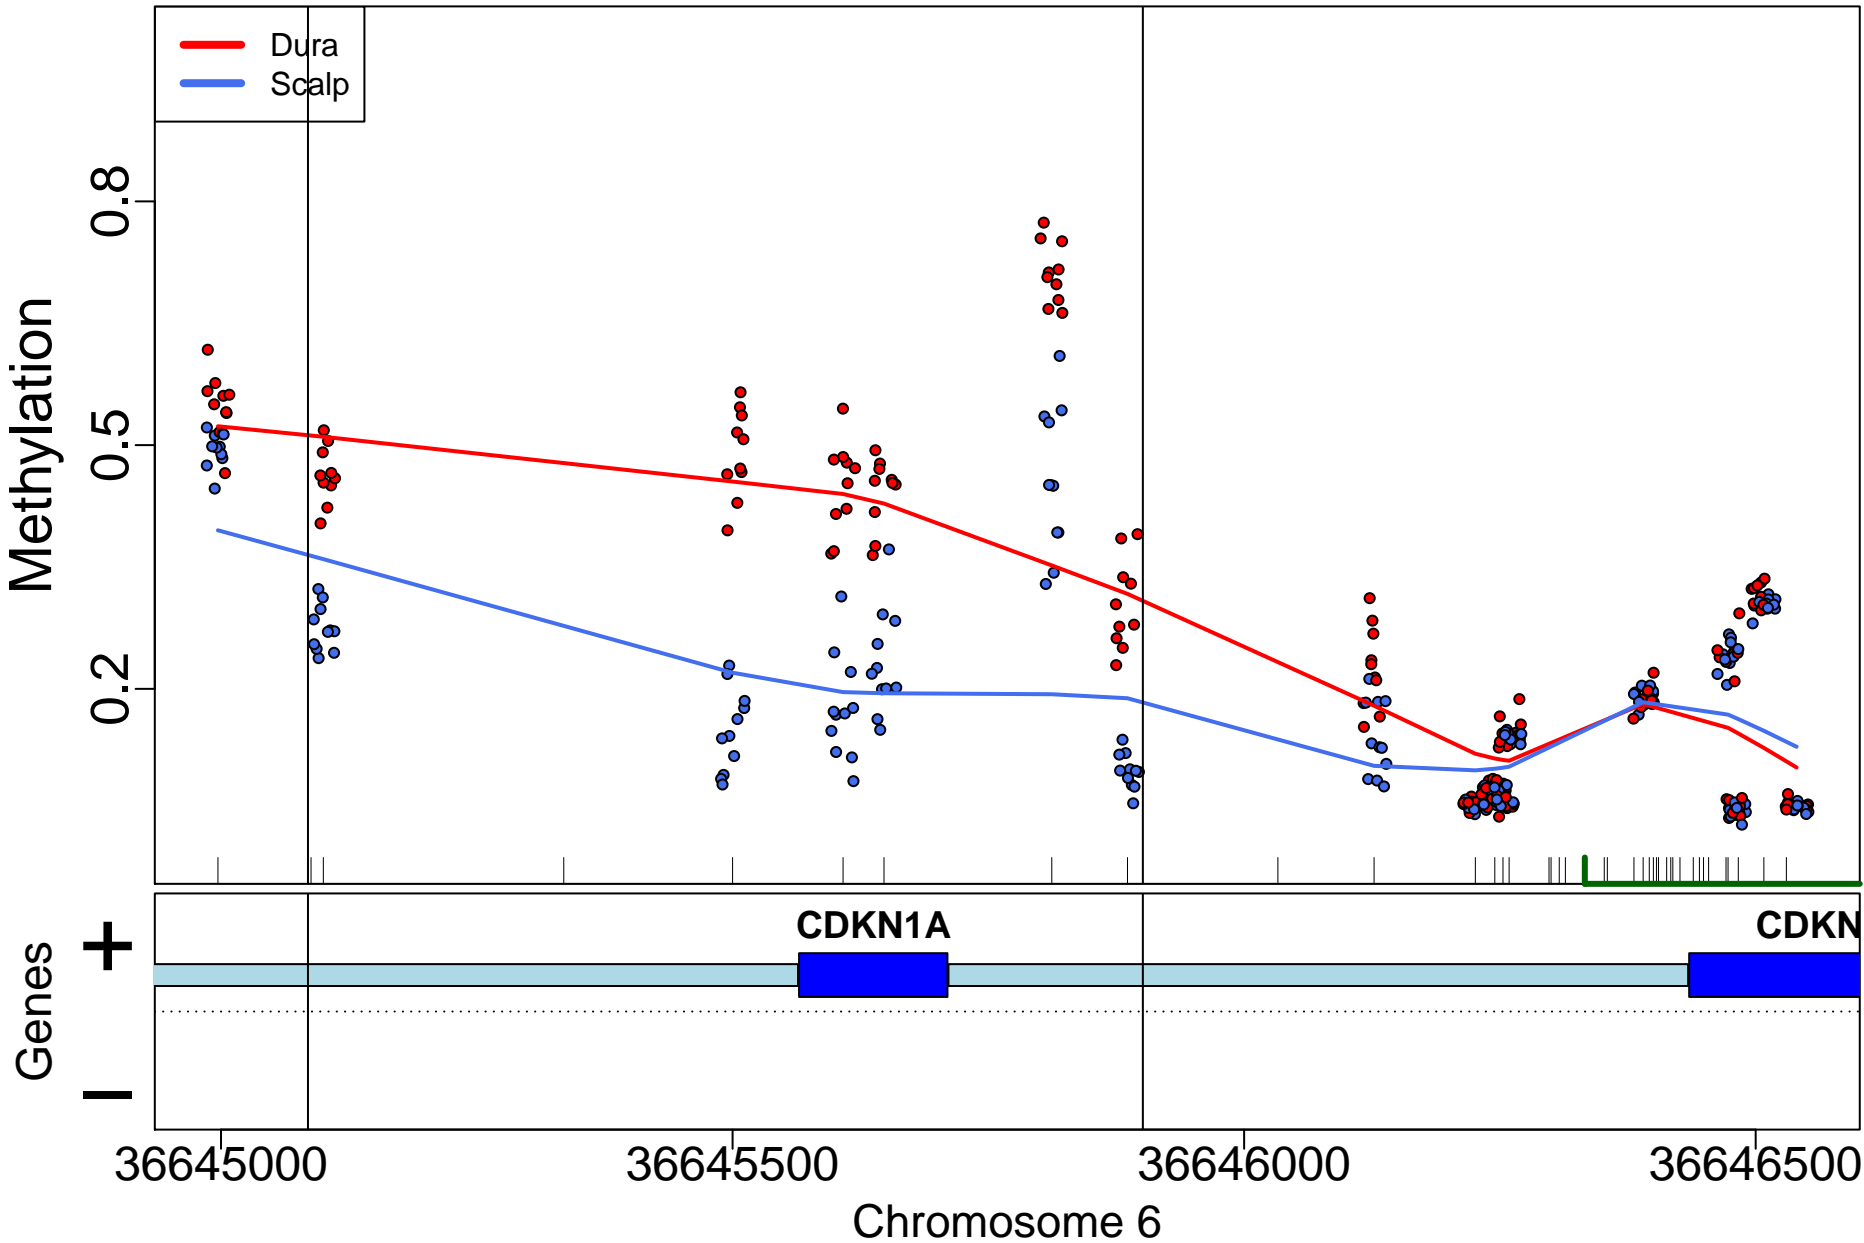

TMEM174; 41823bp from tss:downstream

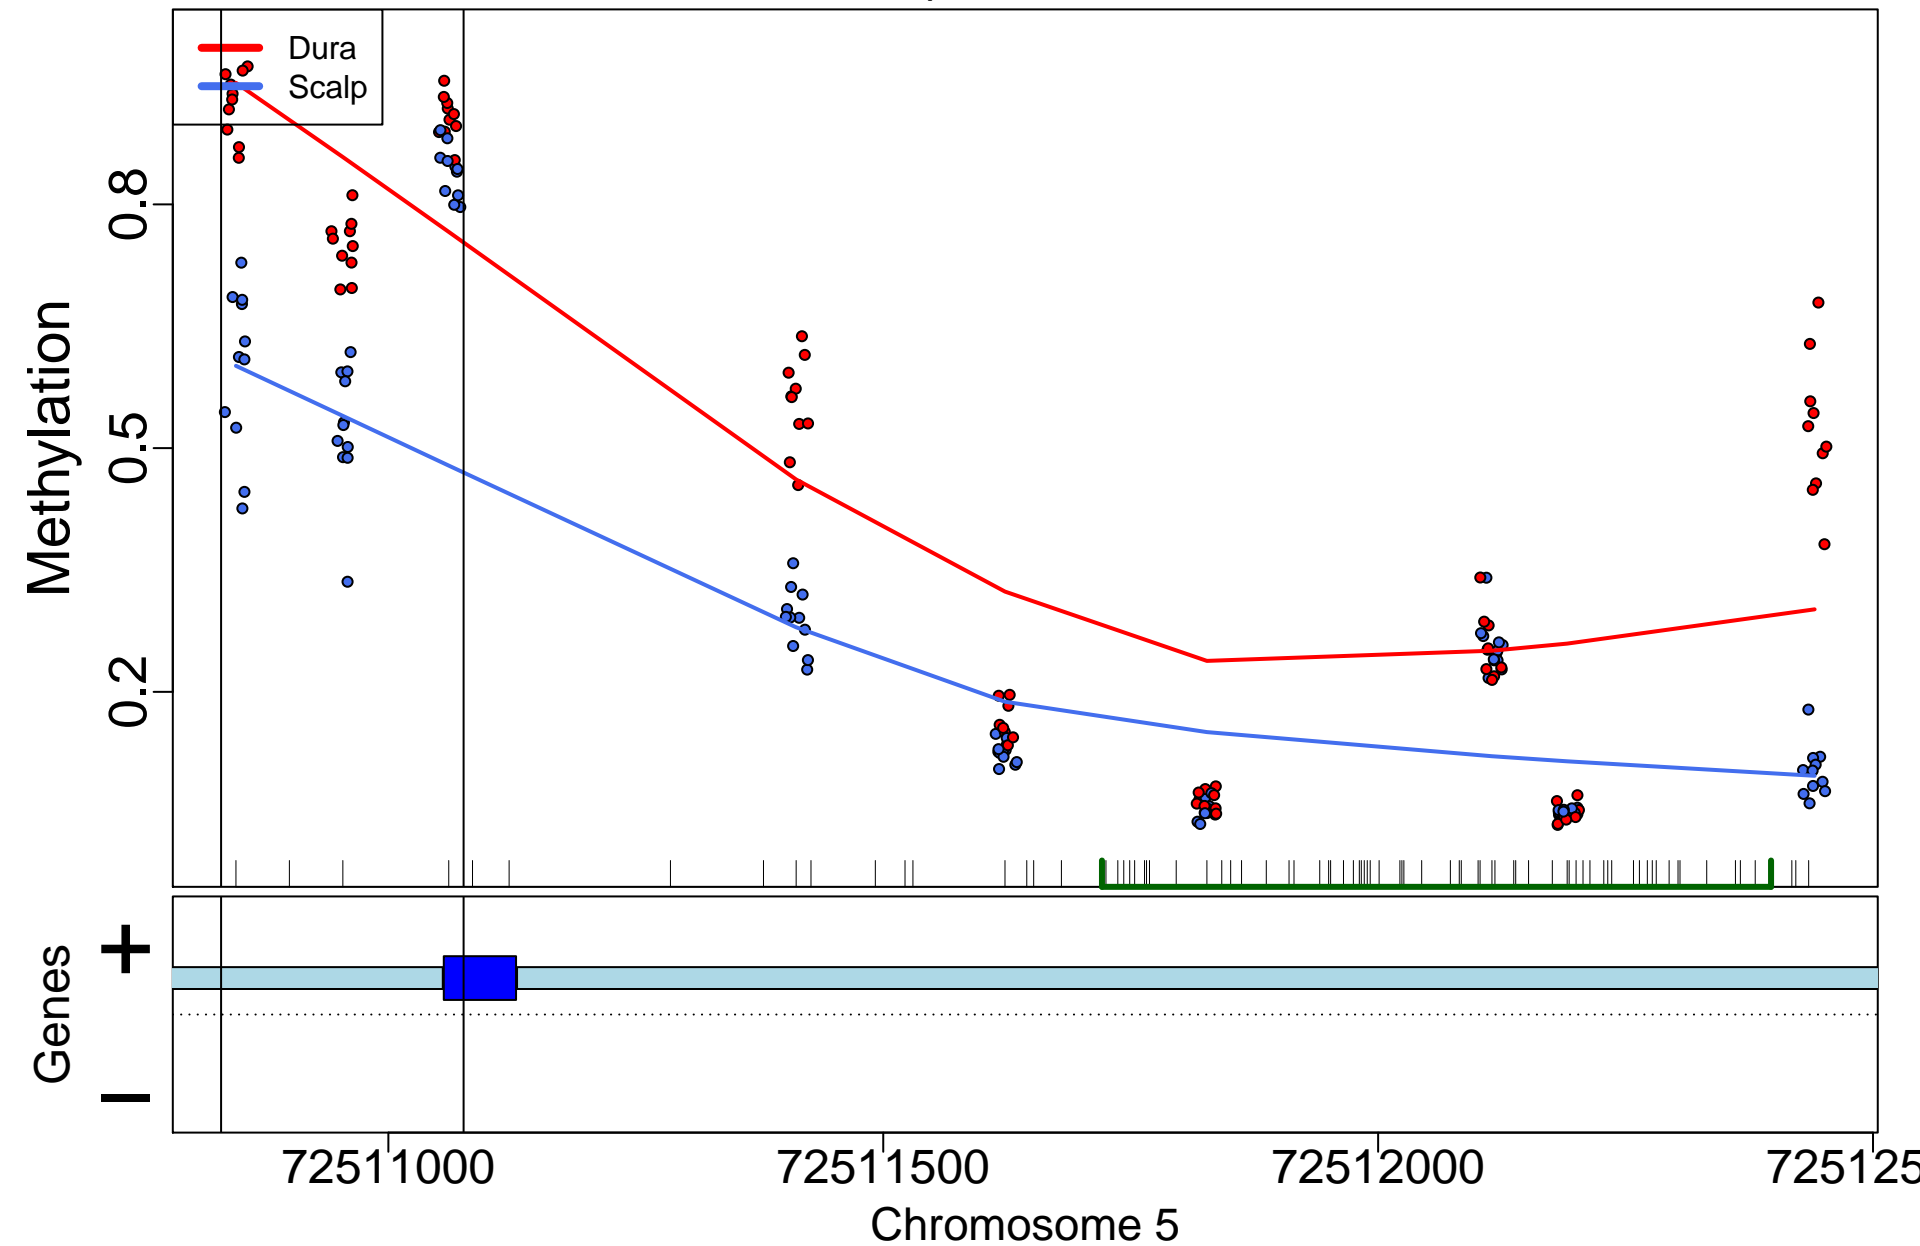



# SCN9A; 875bp from tss:promoter

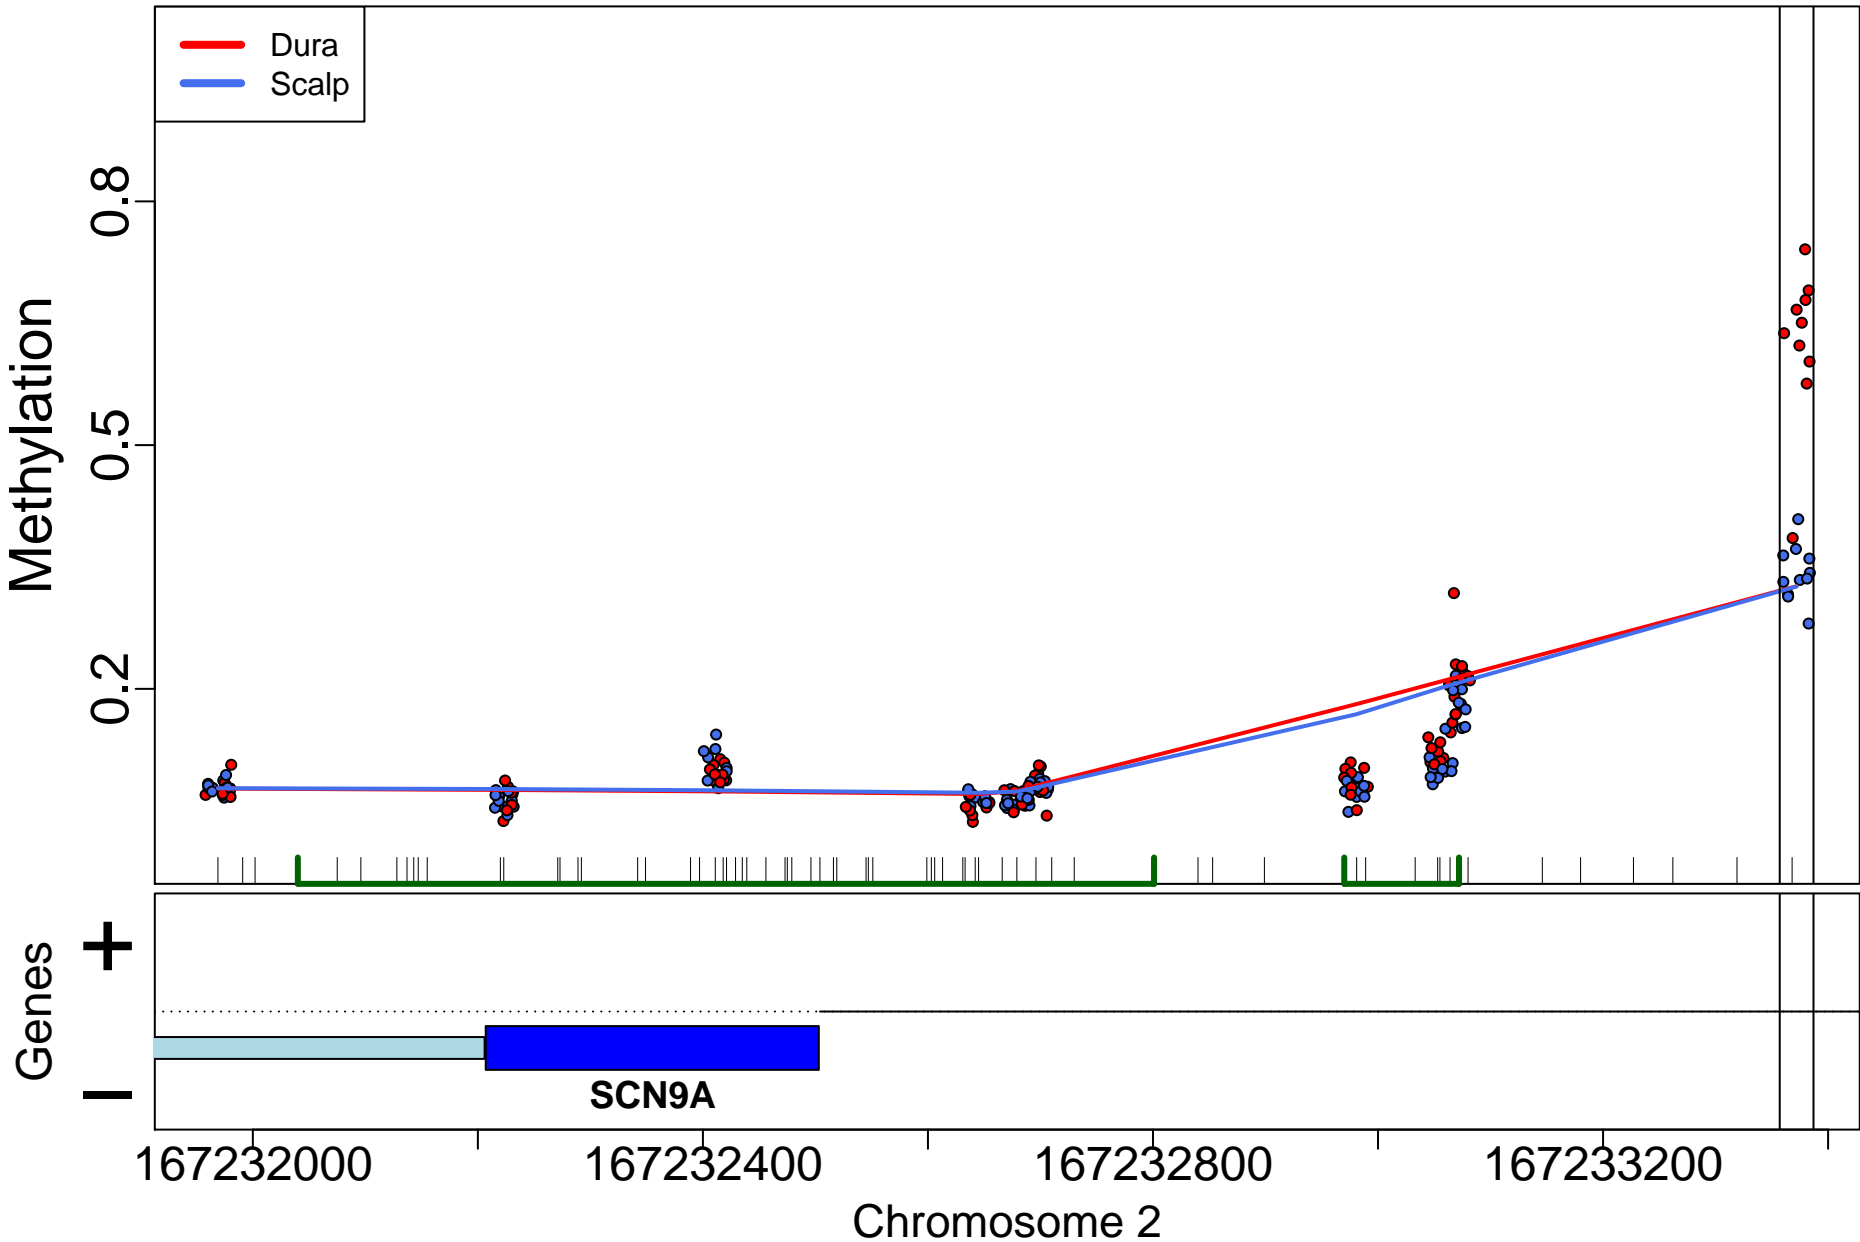

TMEM88; 13bp from tss:overlaps two exons

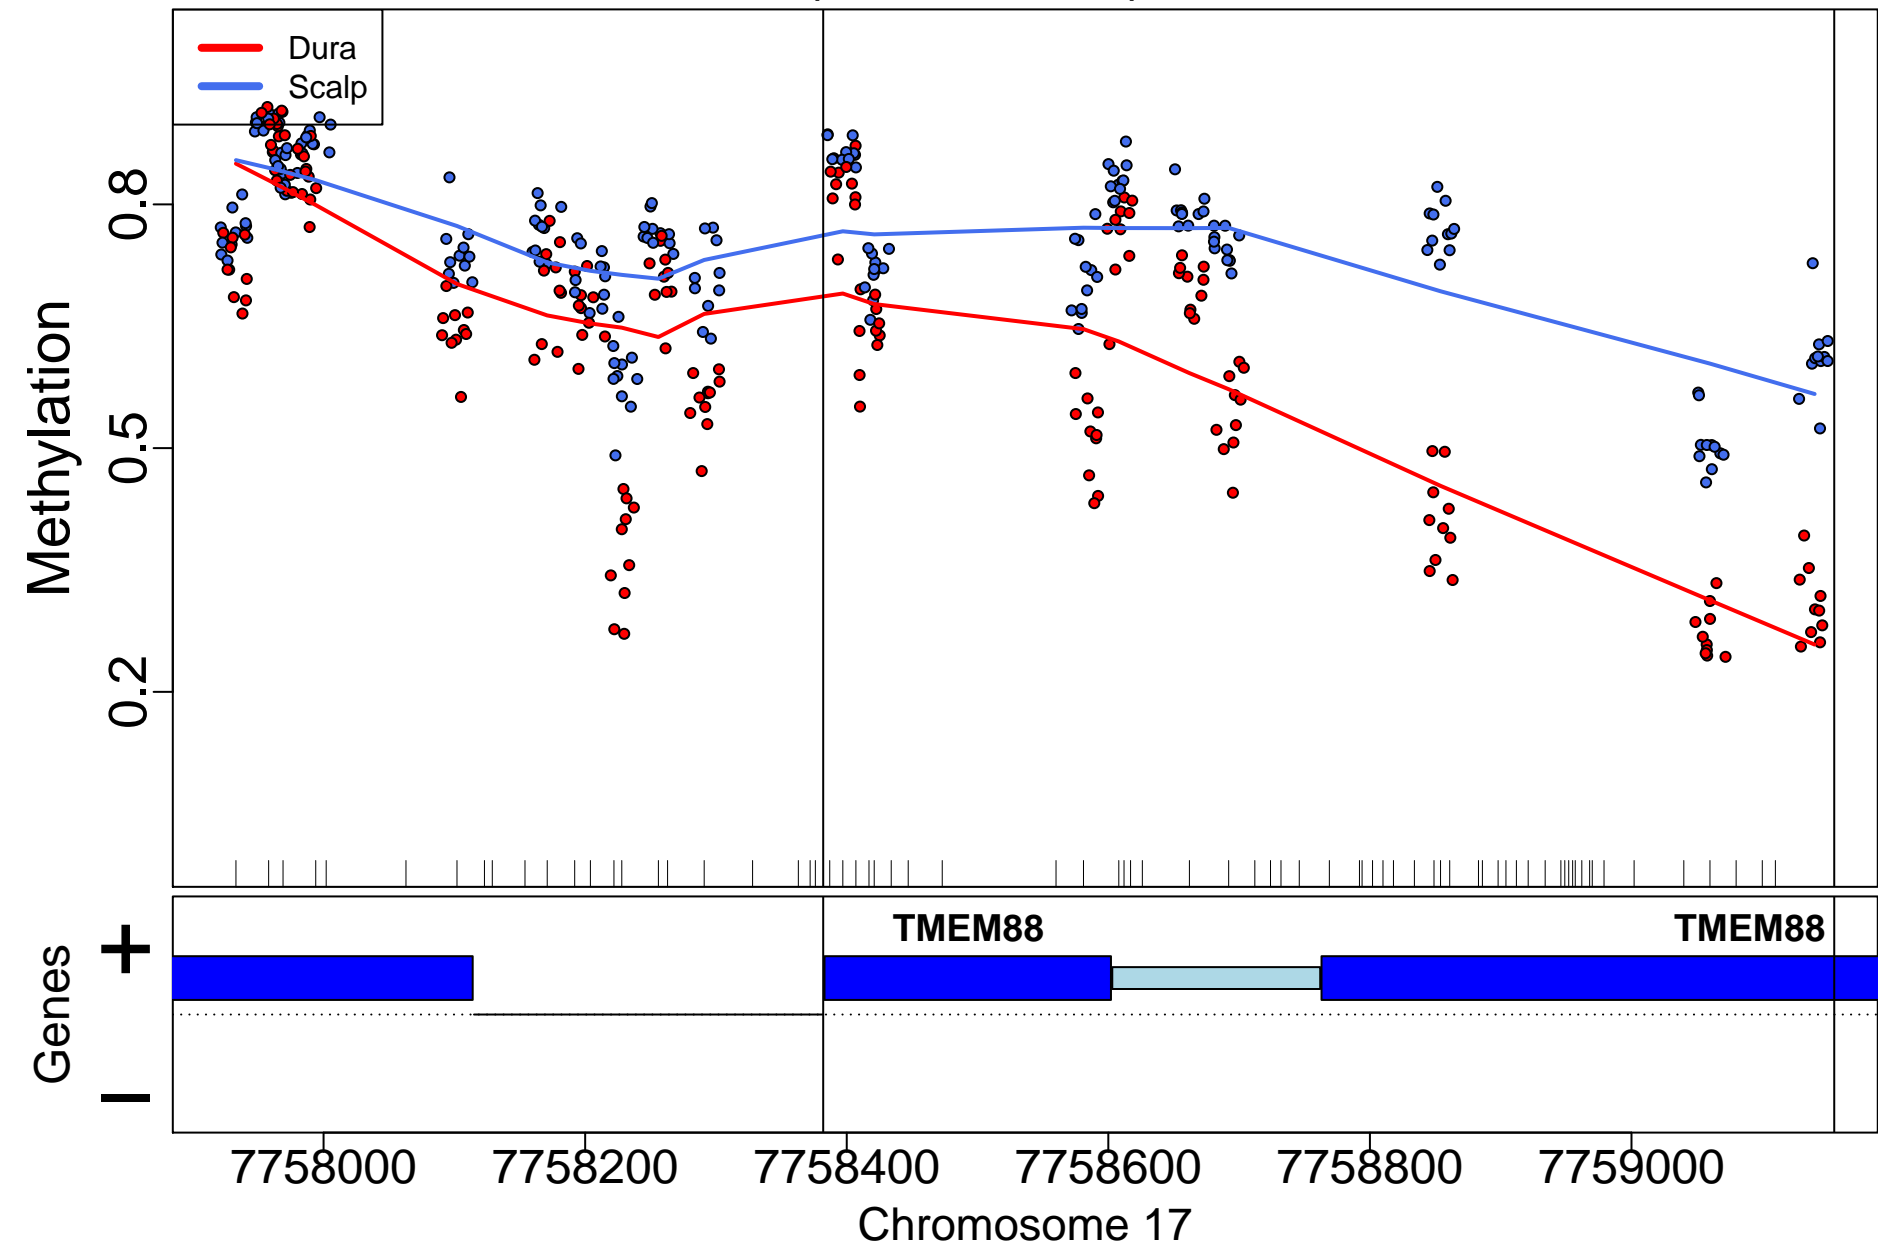

FEZF2; 2733bp from tss:upstream

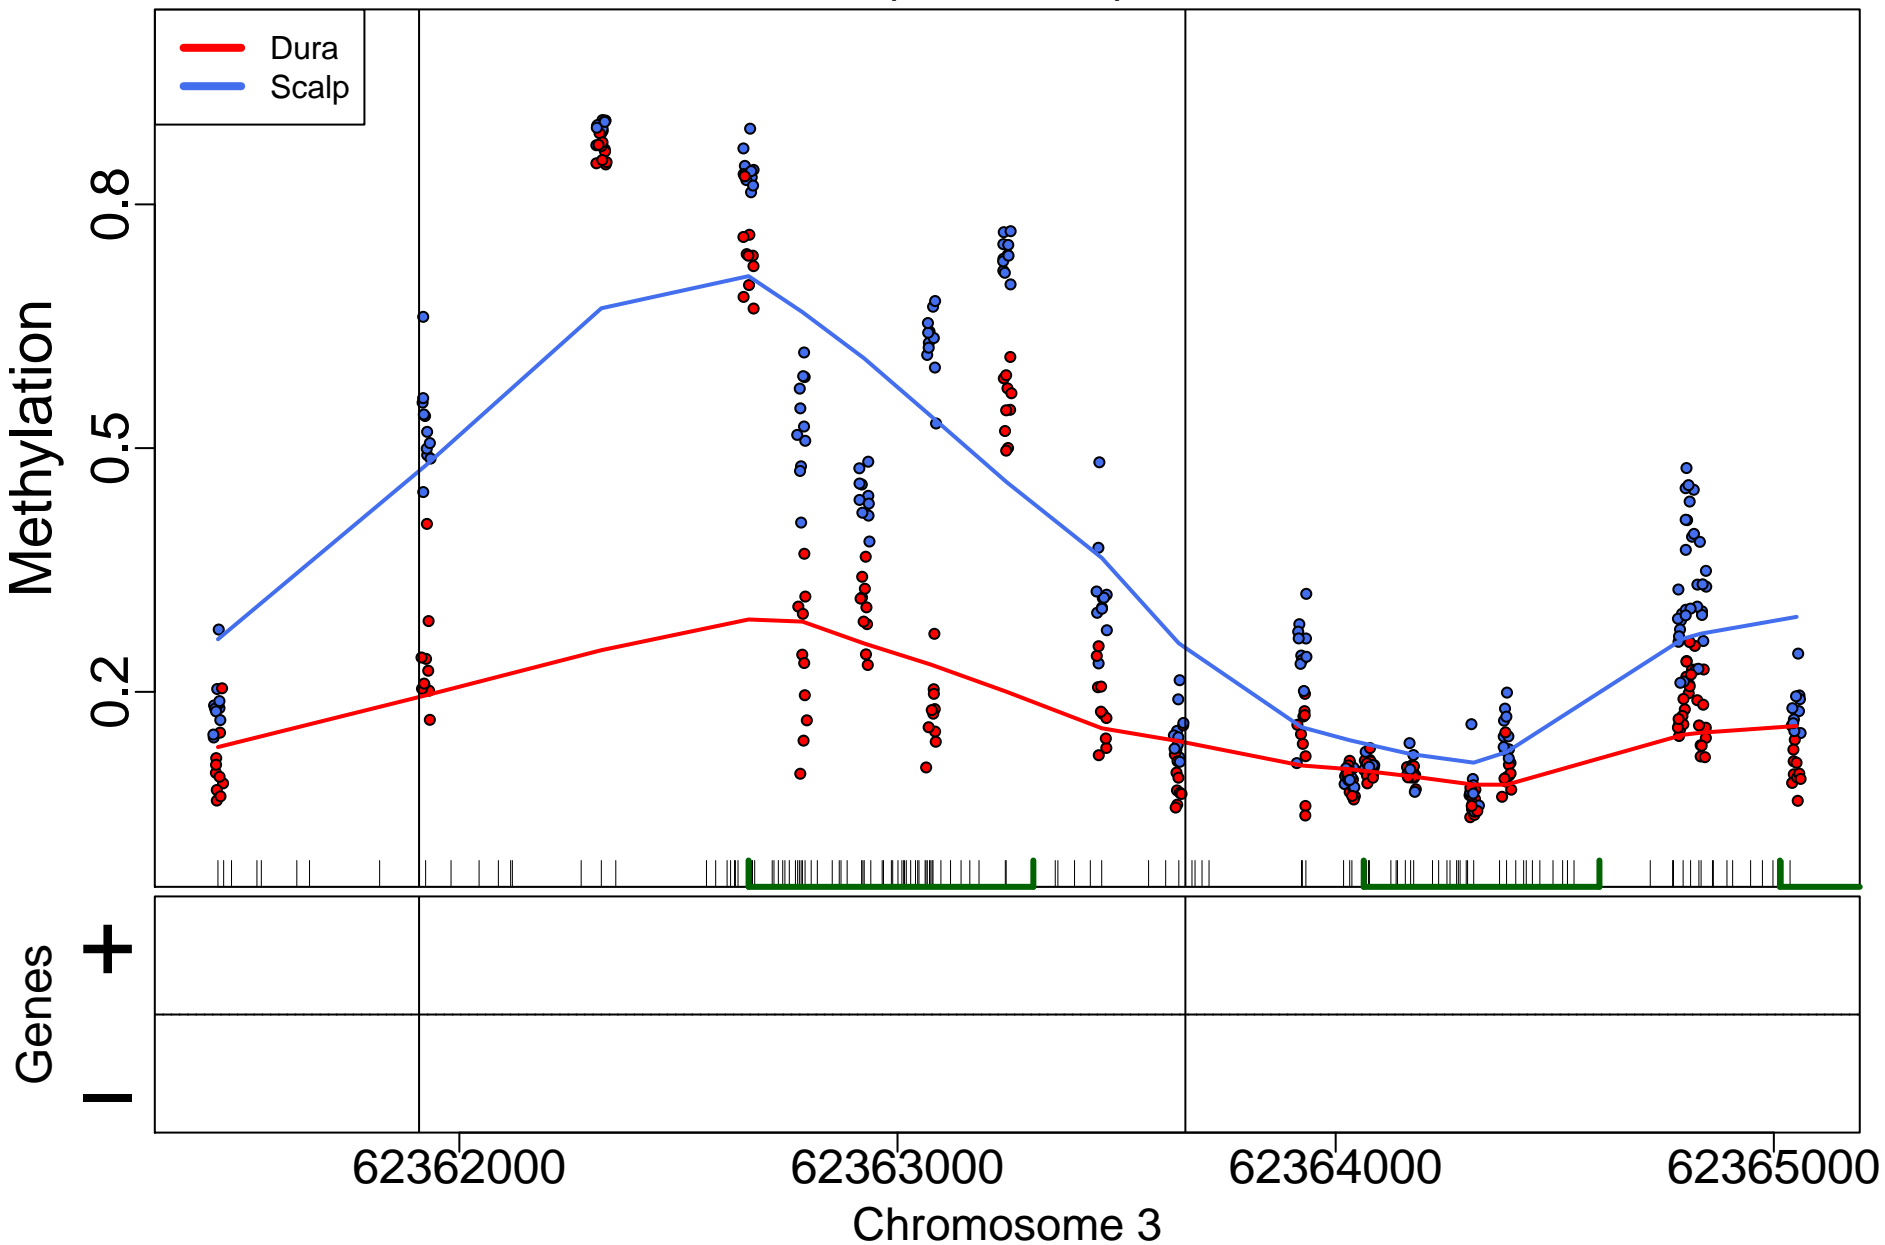

BAALC; 671bp from tss:inside intron

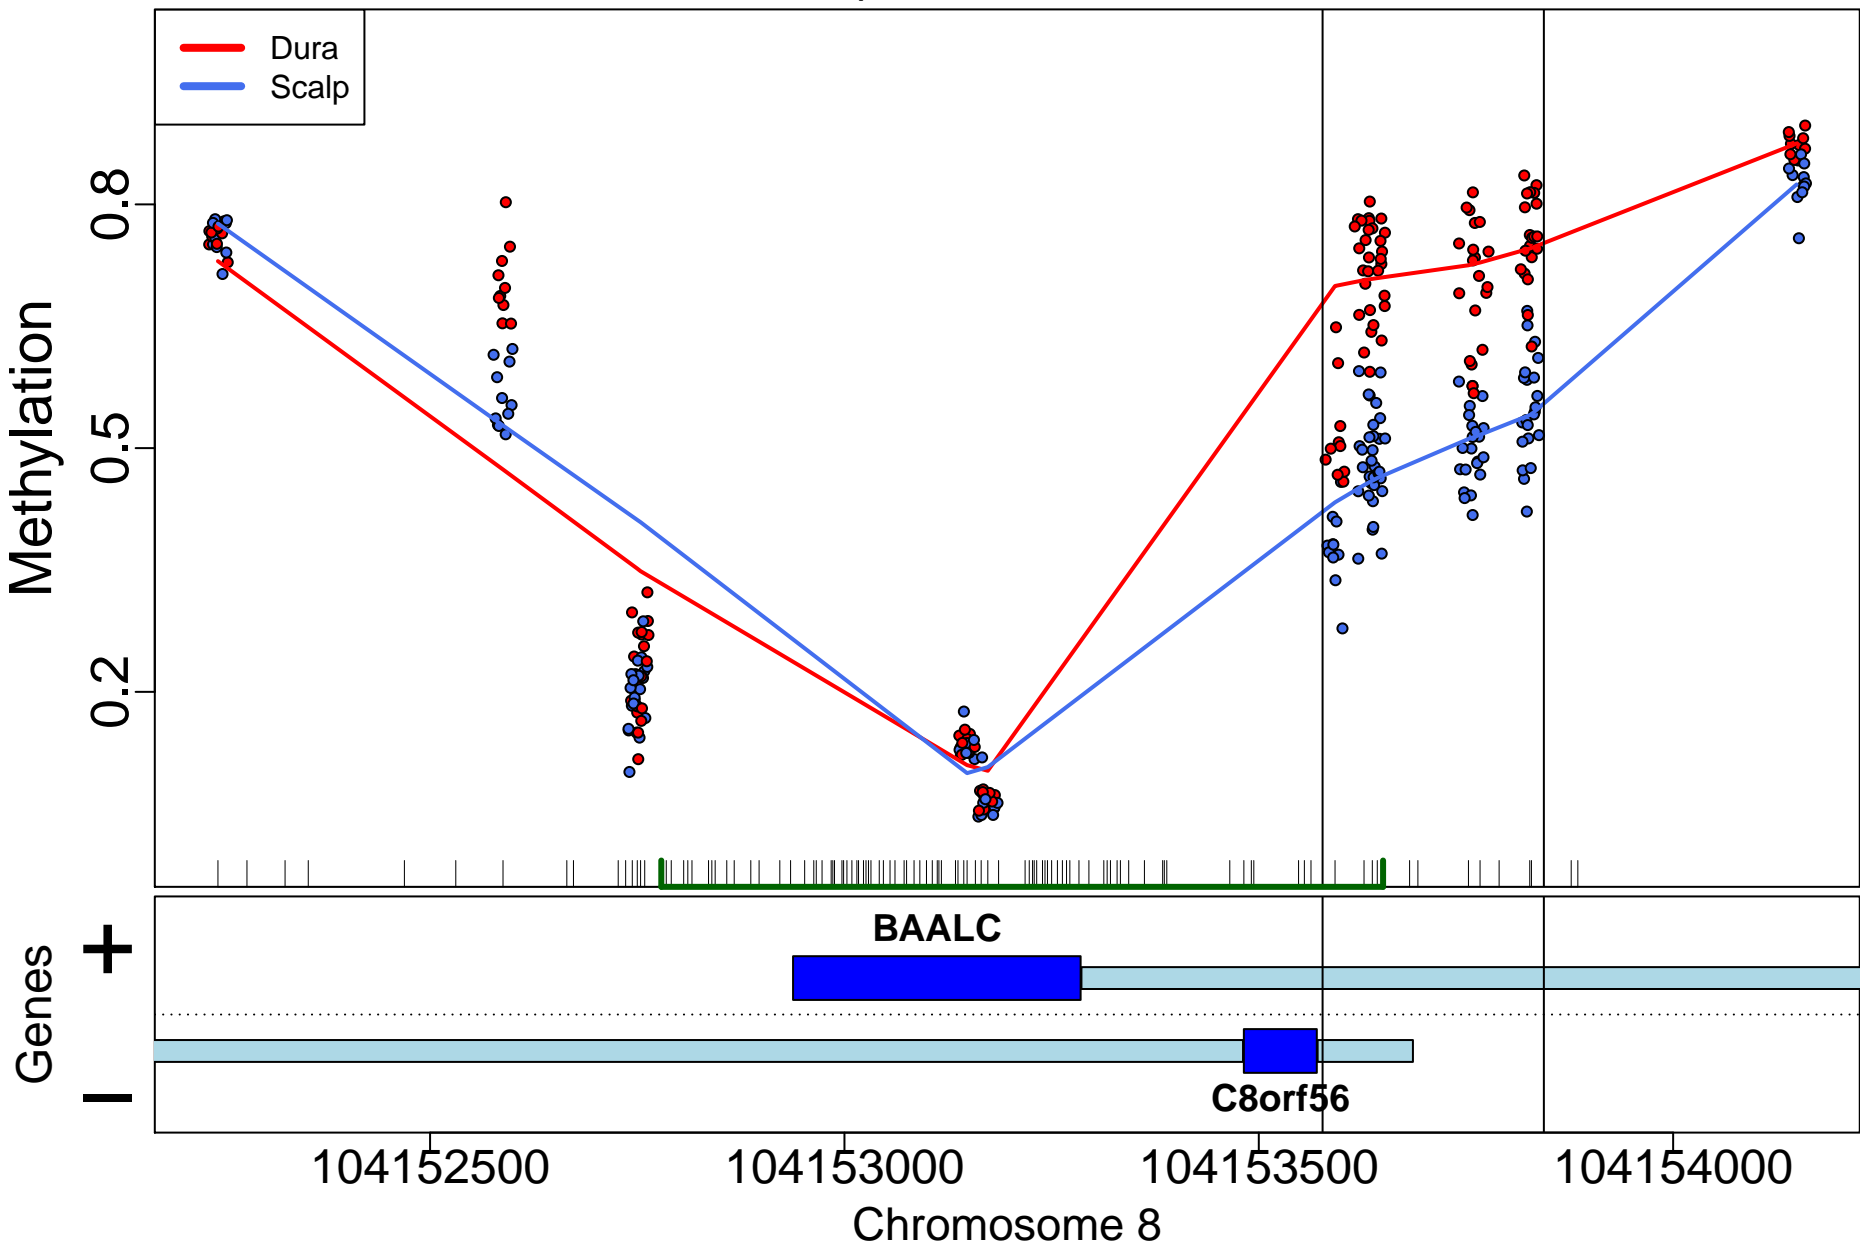

# GABBR1; 18723bp from tss:overlaps exon upstream

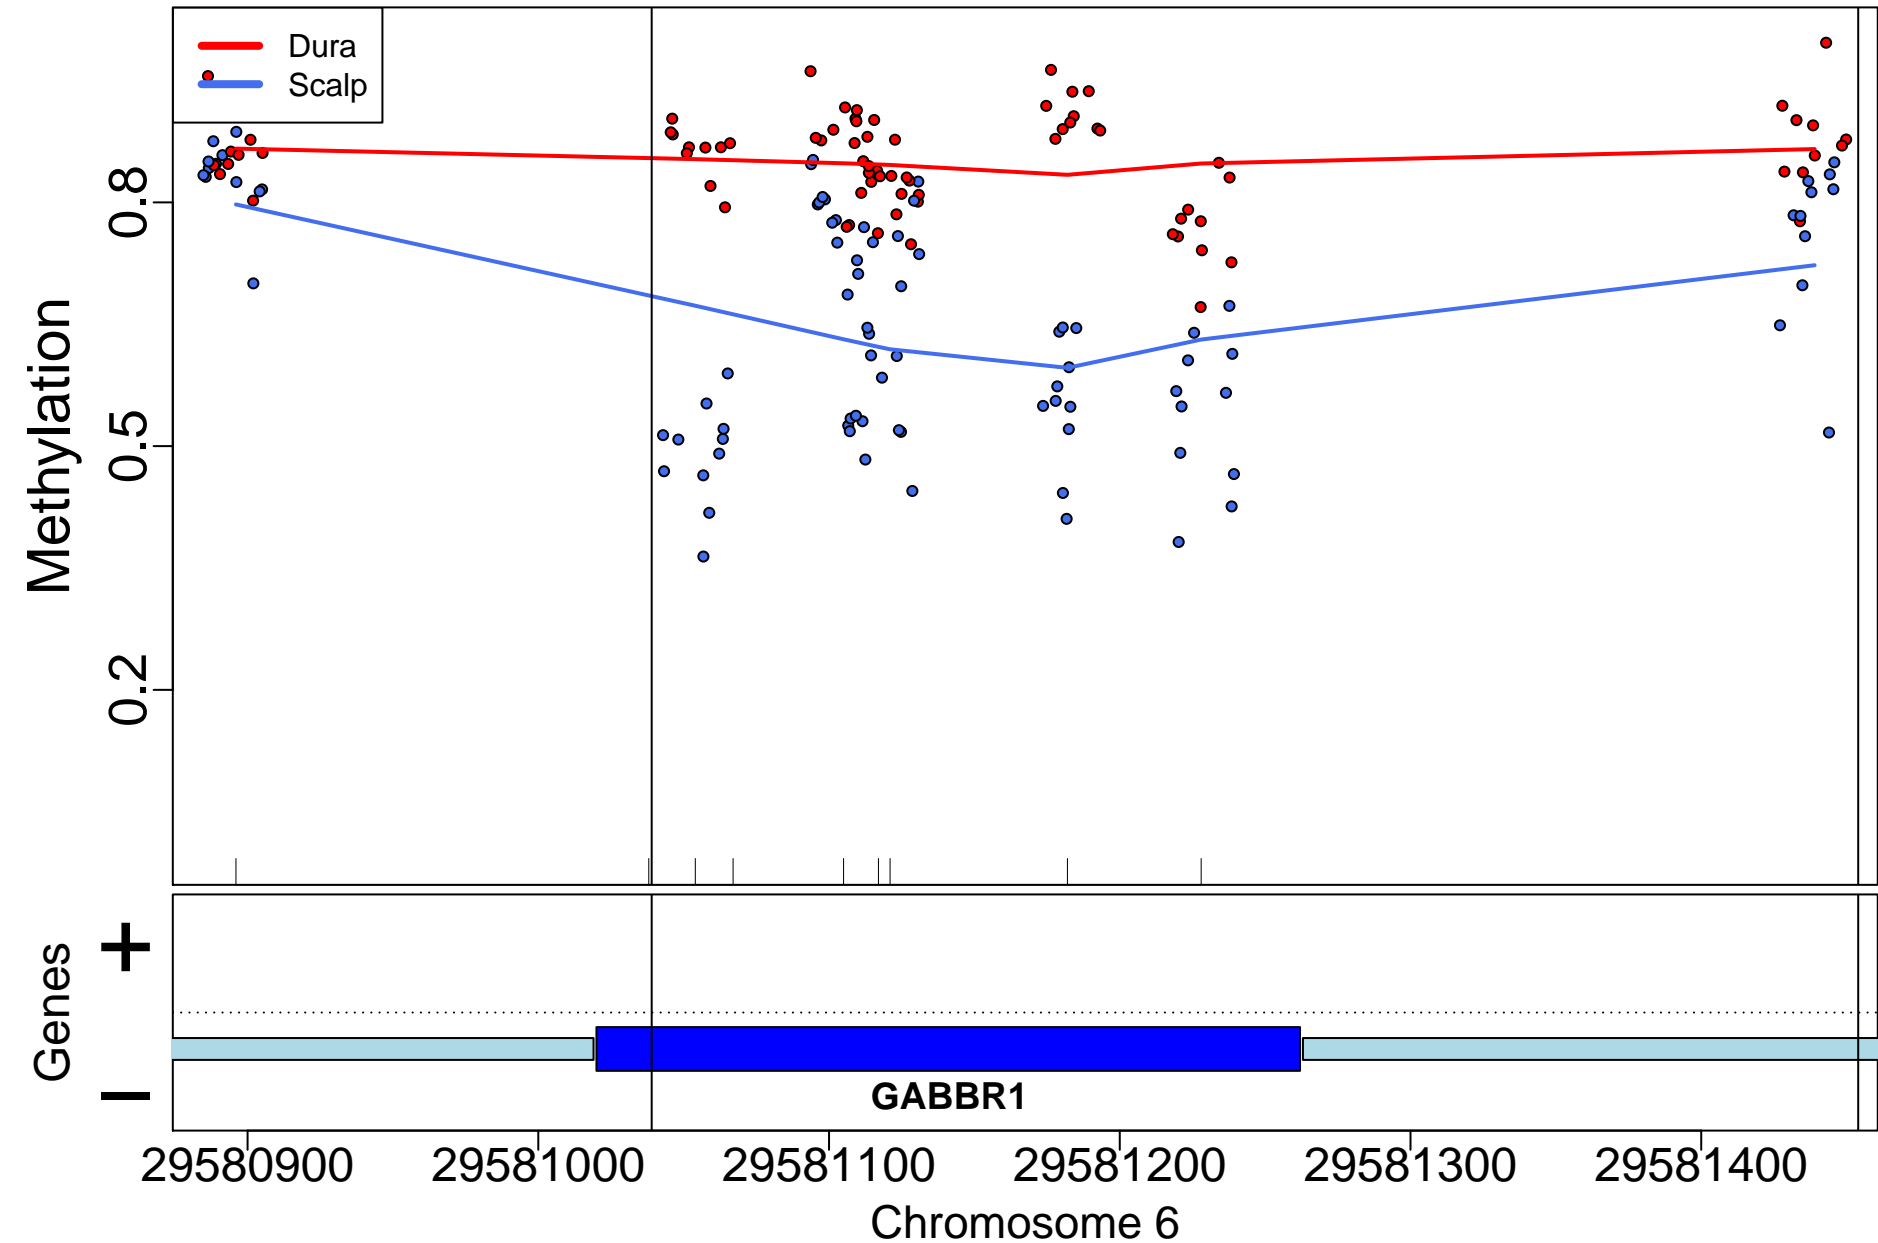

FAM107A; 0bp from tss:overlaps 5'

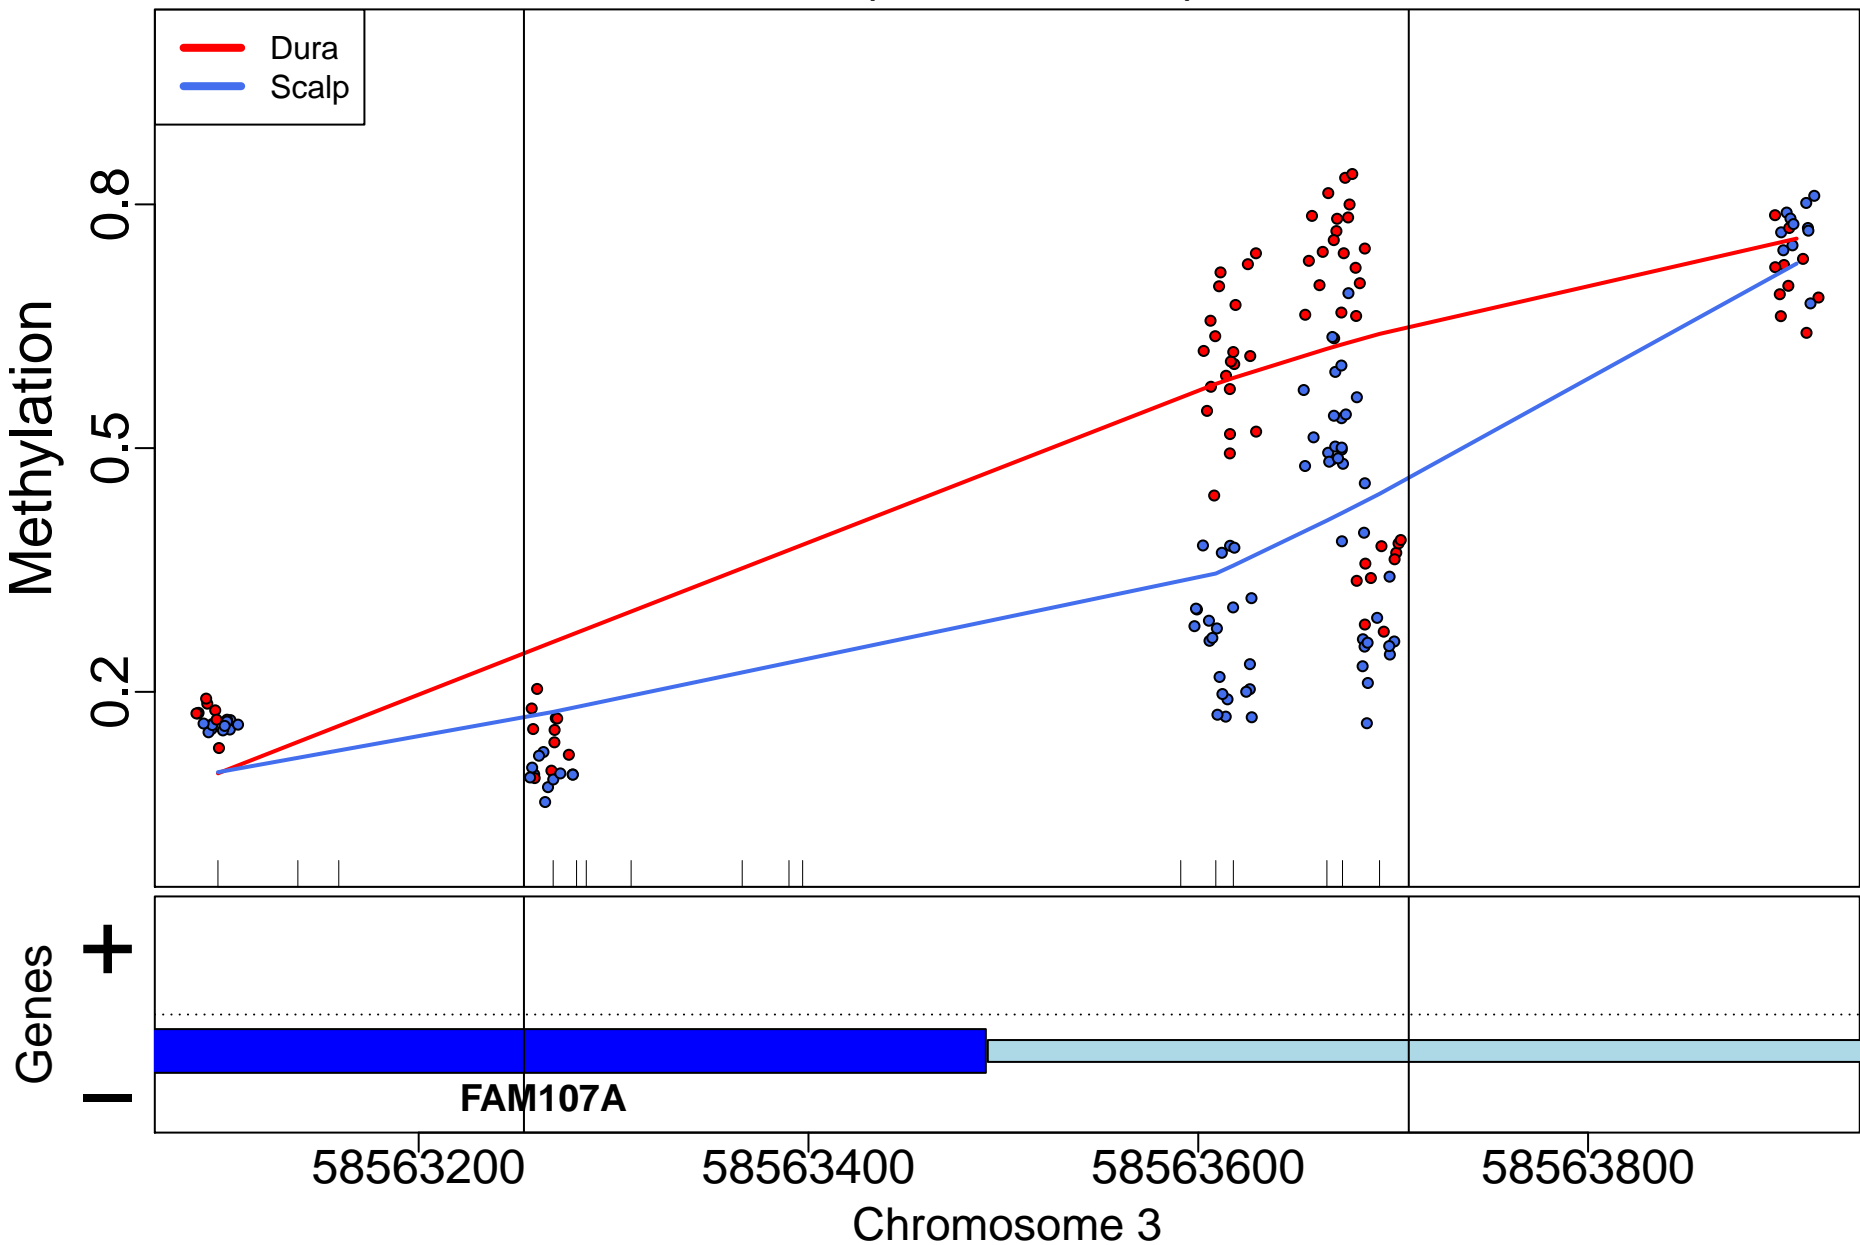

# PHACTR3; 244bp from tss:overlaps exon downstream

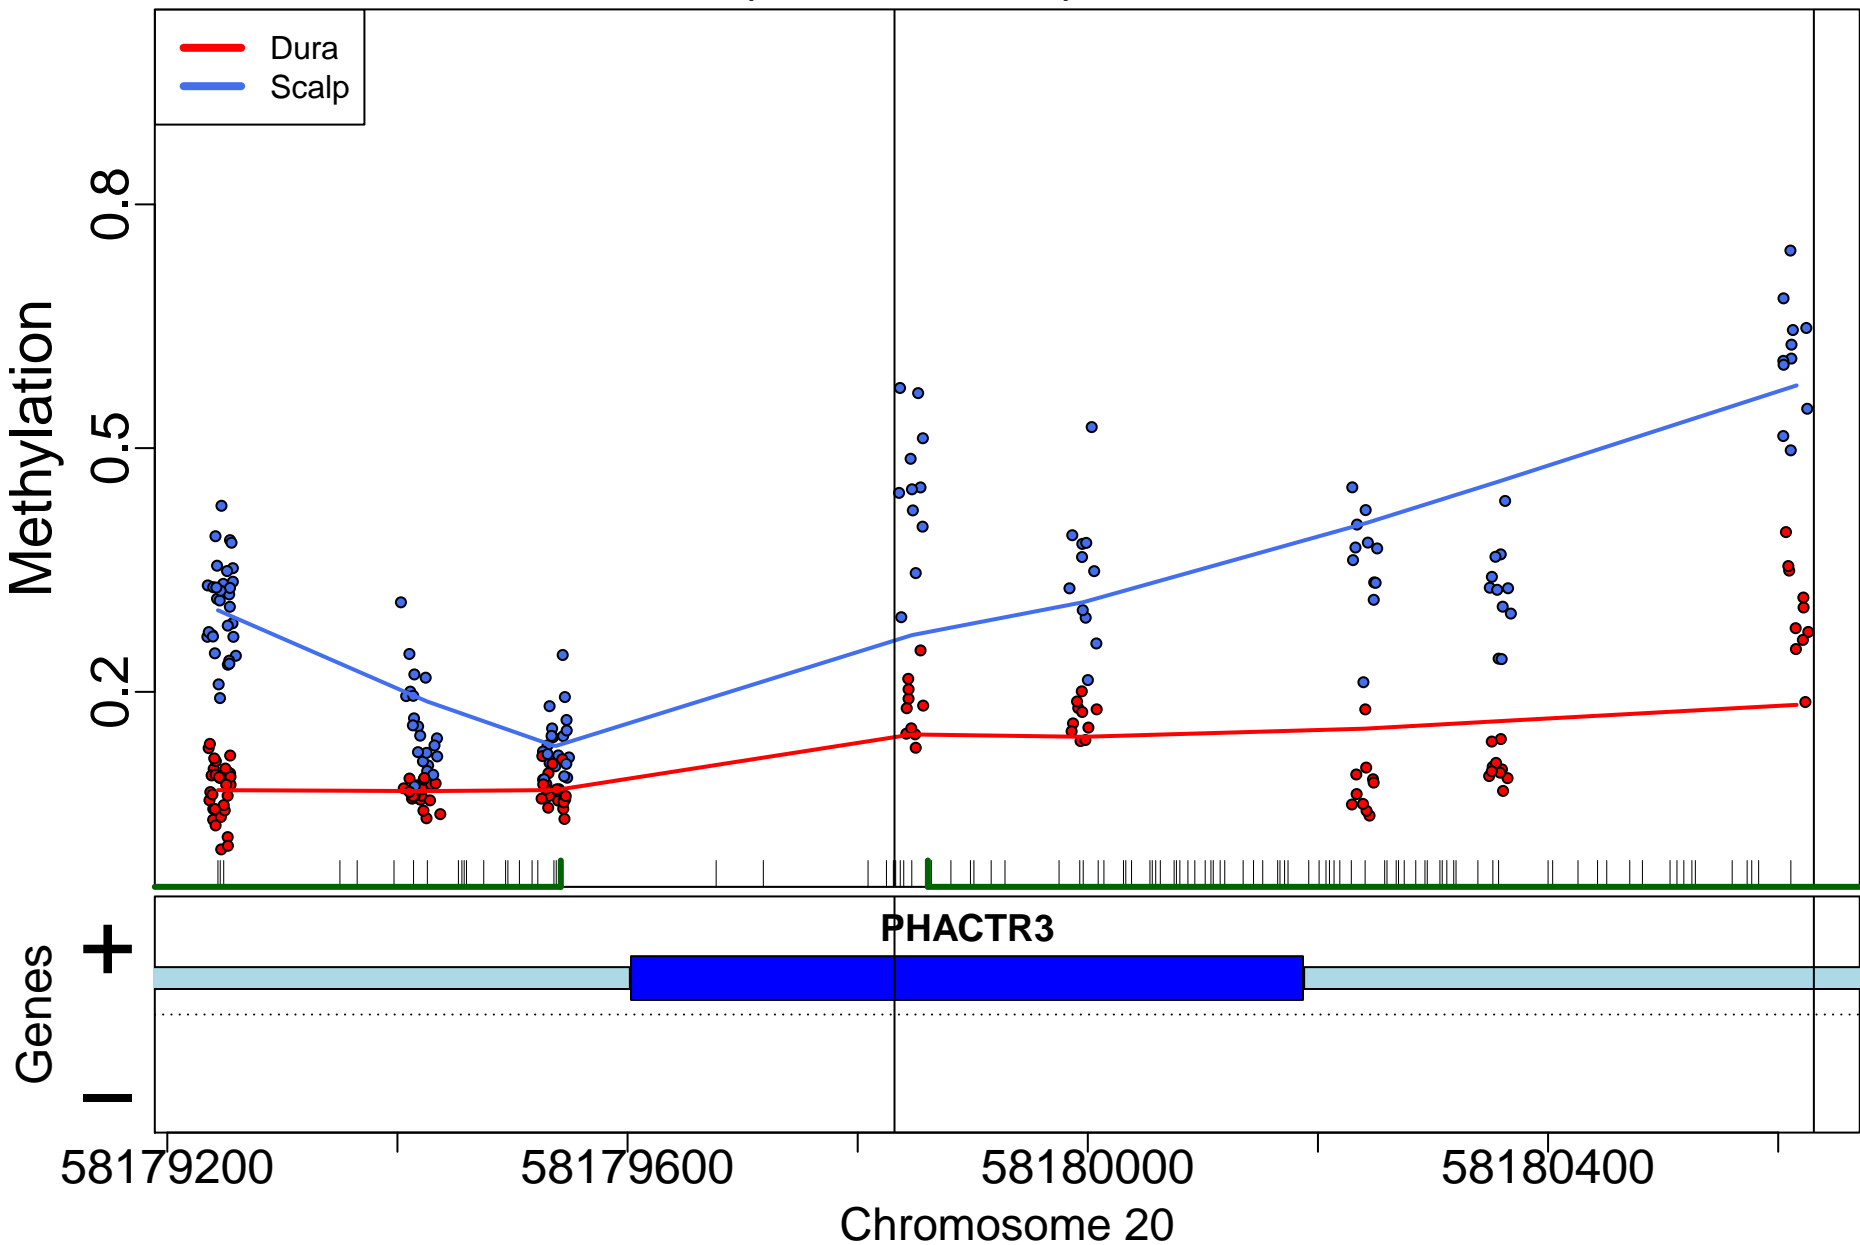

# HTRA1; 537bp from tss:promoter

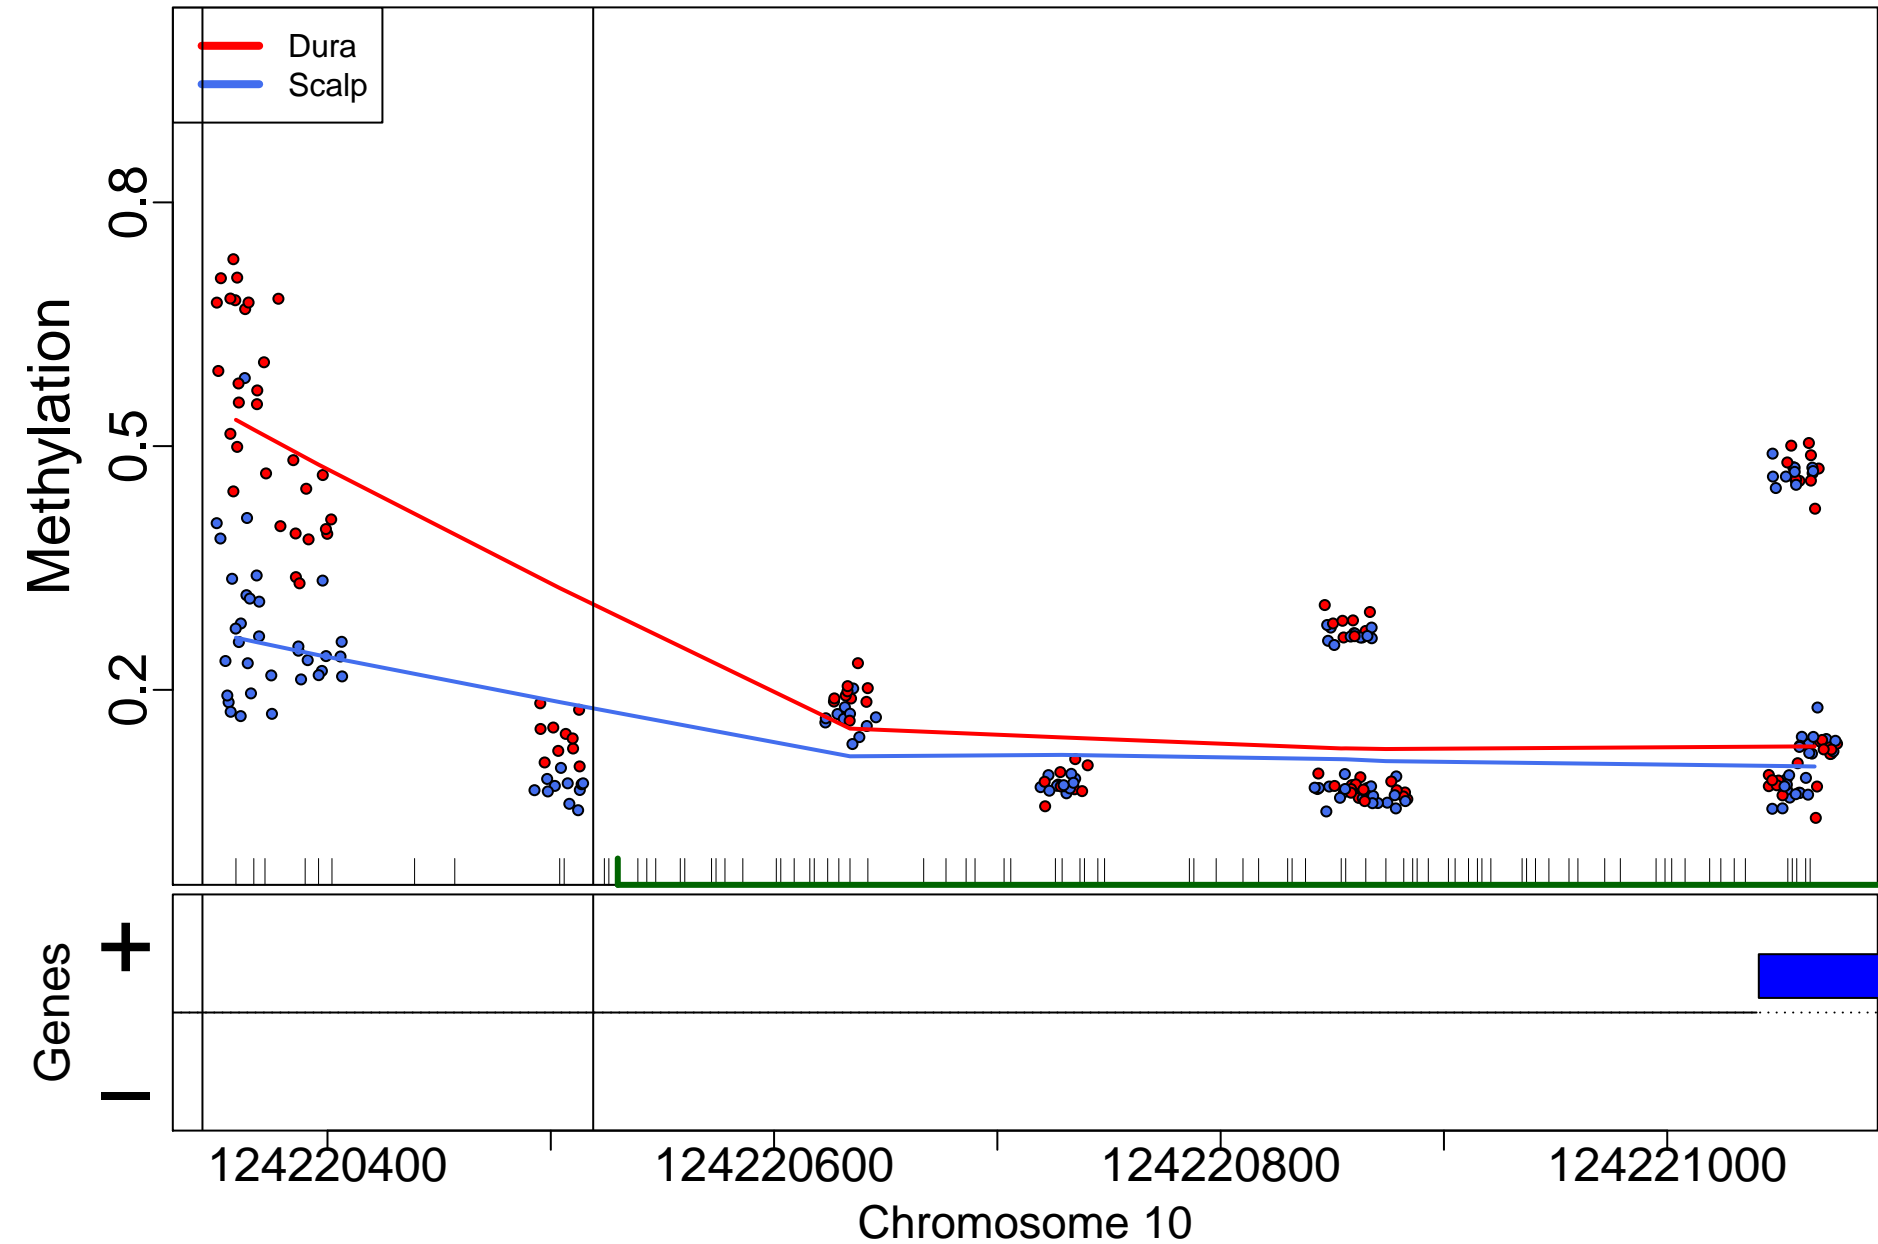



MSX1; 11871bp from tss:downstream

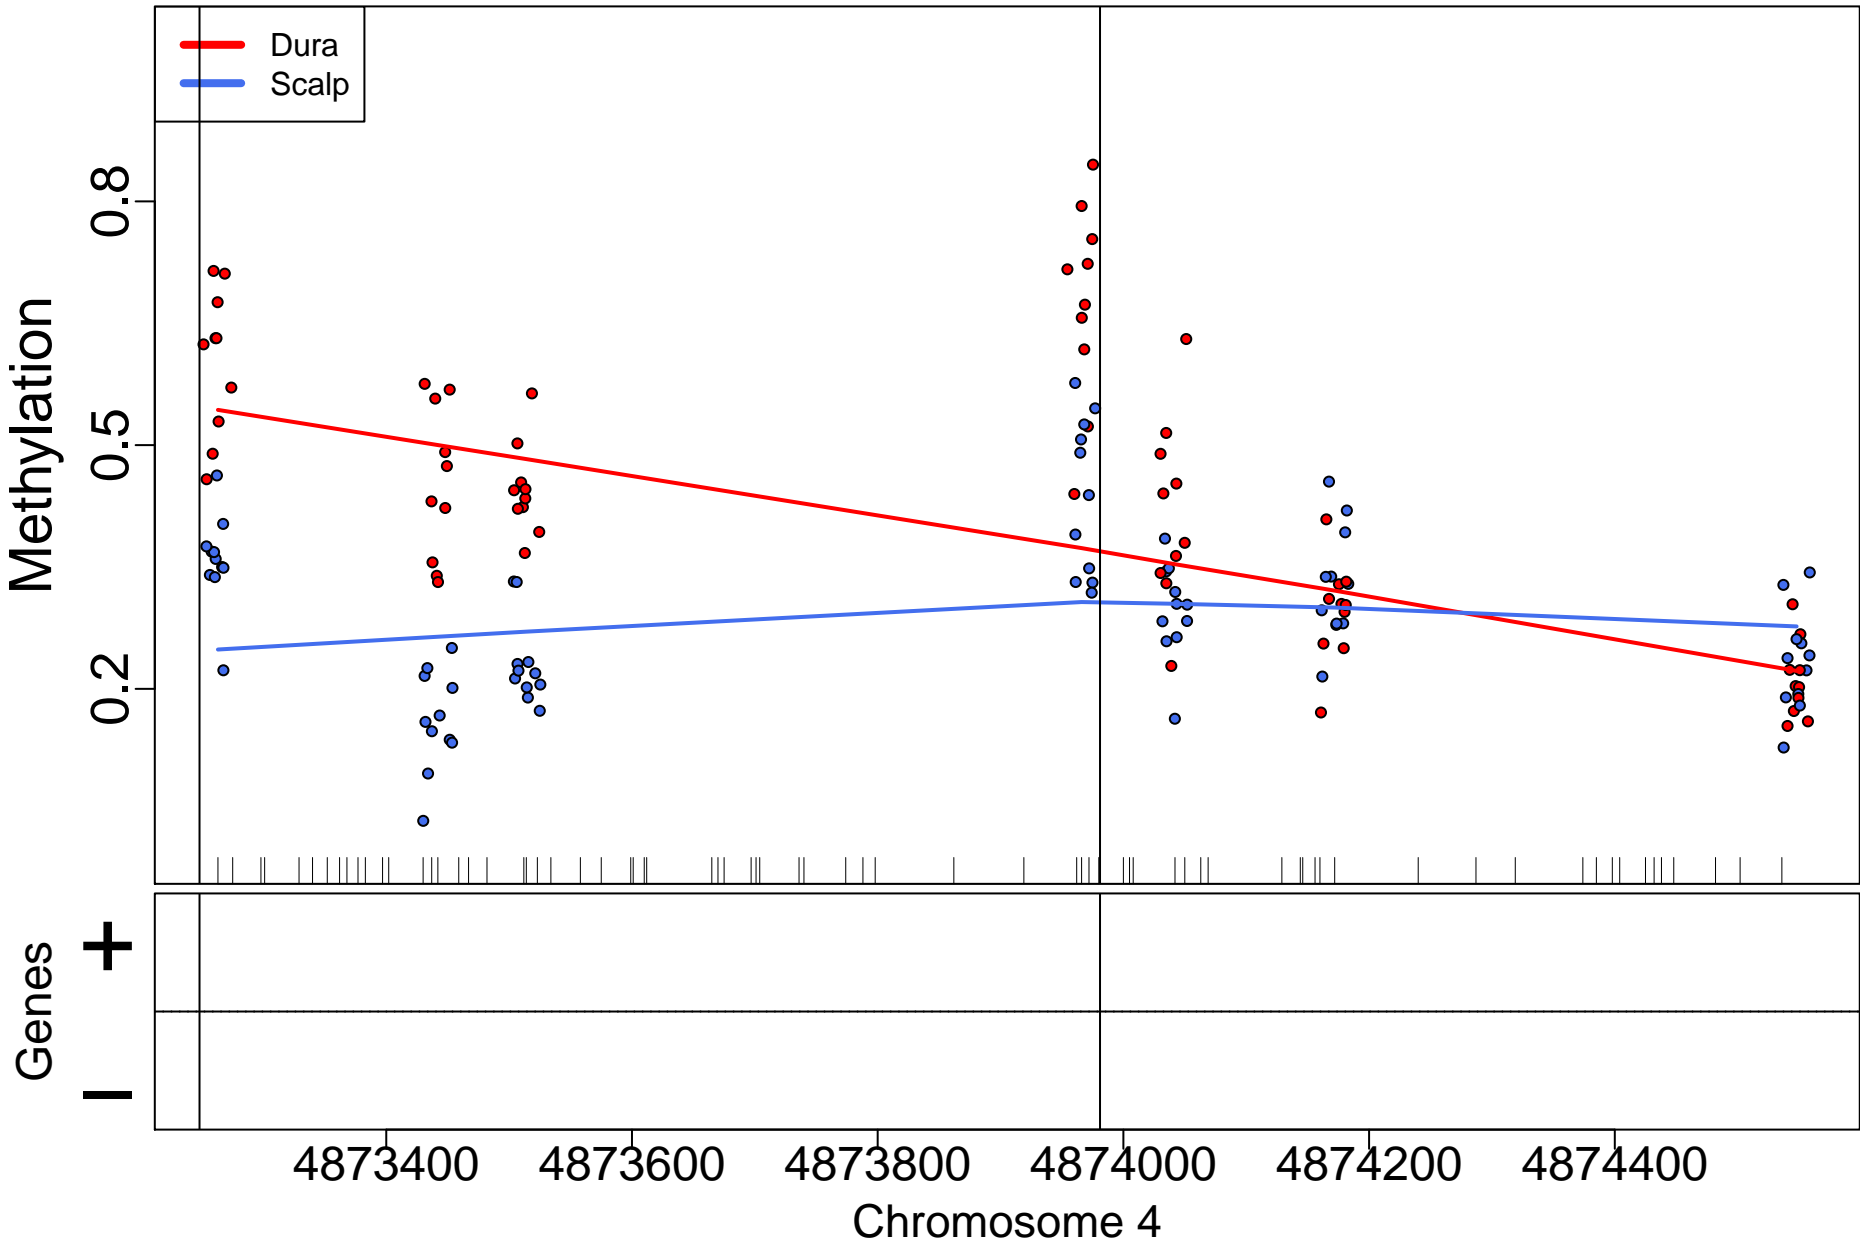

MGAT5B; 3763bp from tss:inside intron

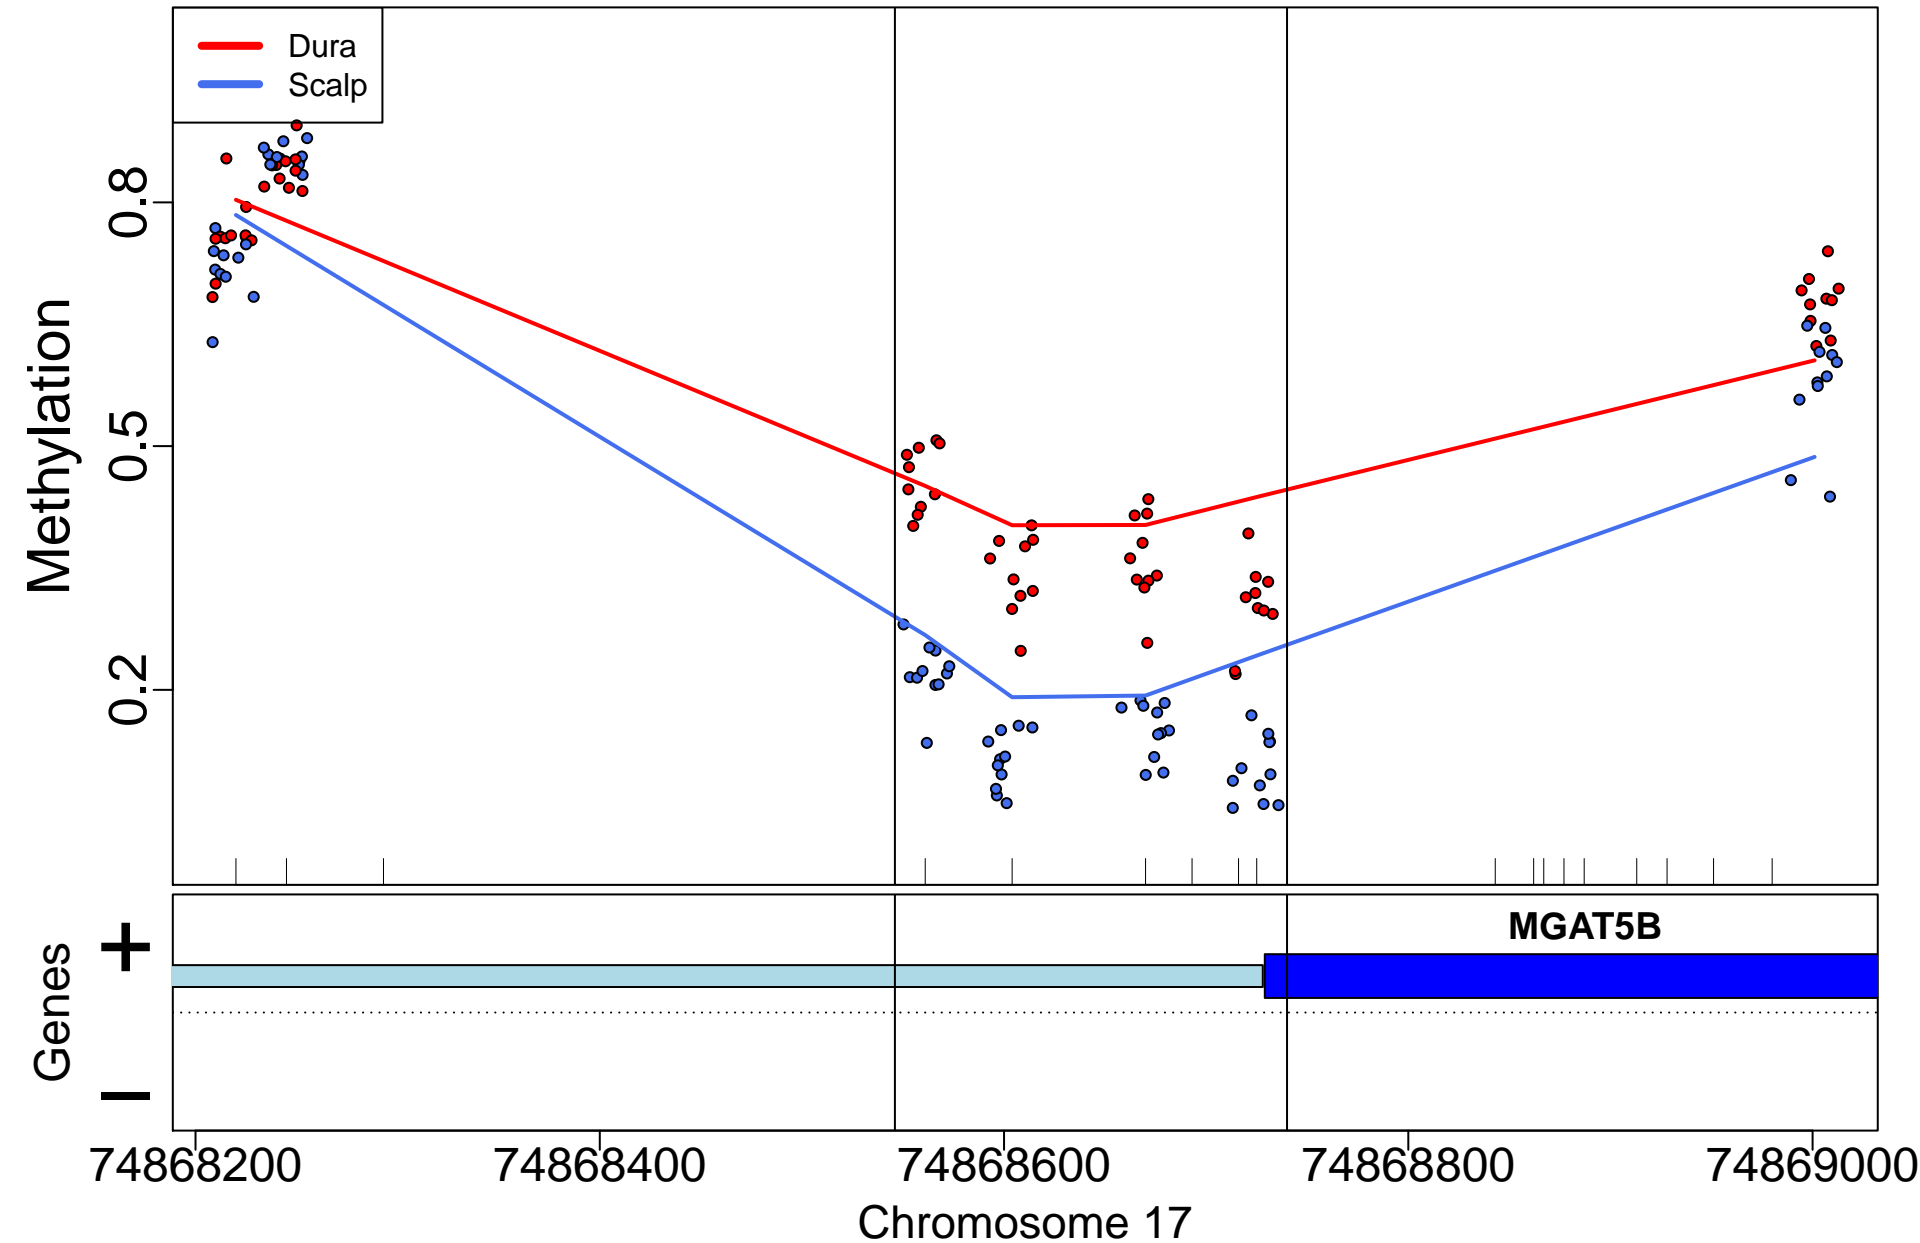

LOC648987; 0bp from tss:NA

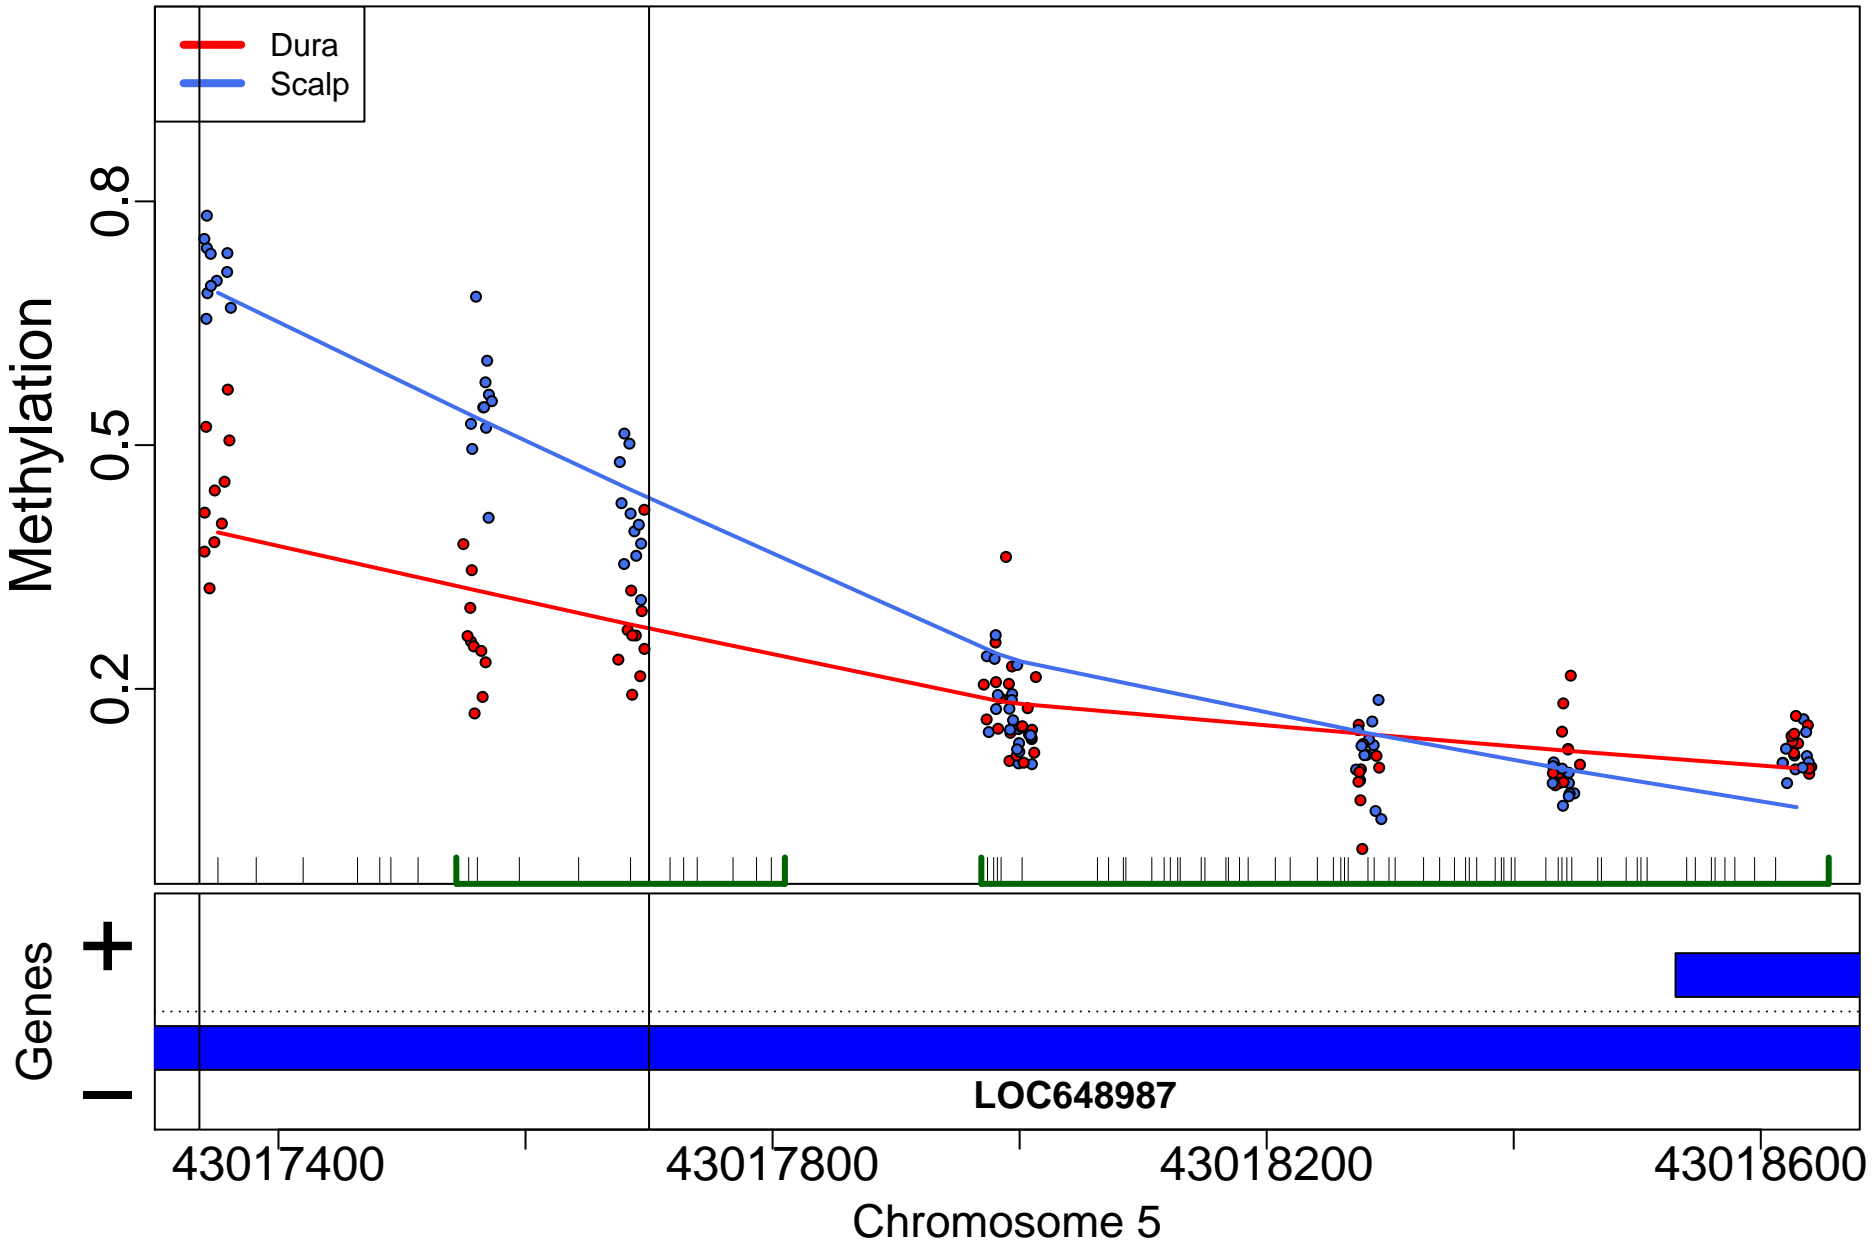

TBC1D9B; 751bp from tss:promoter

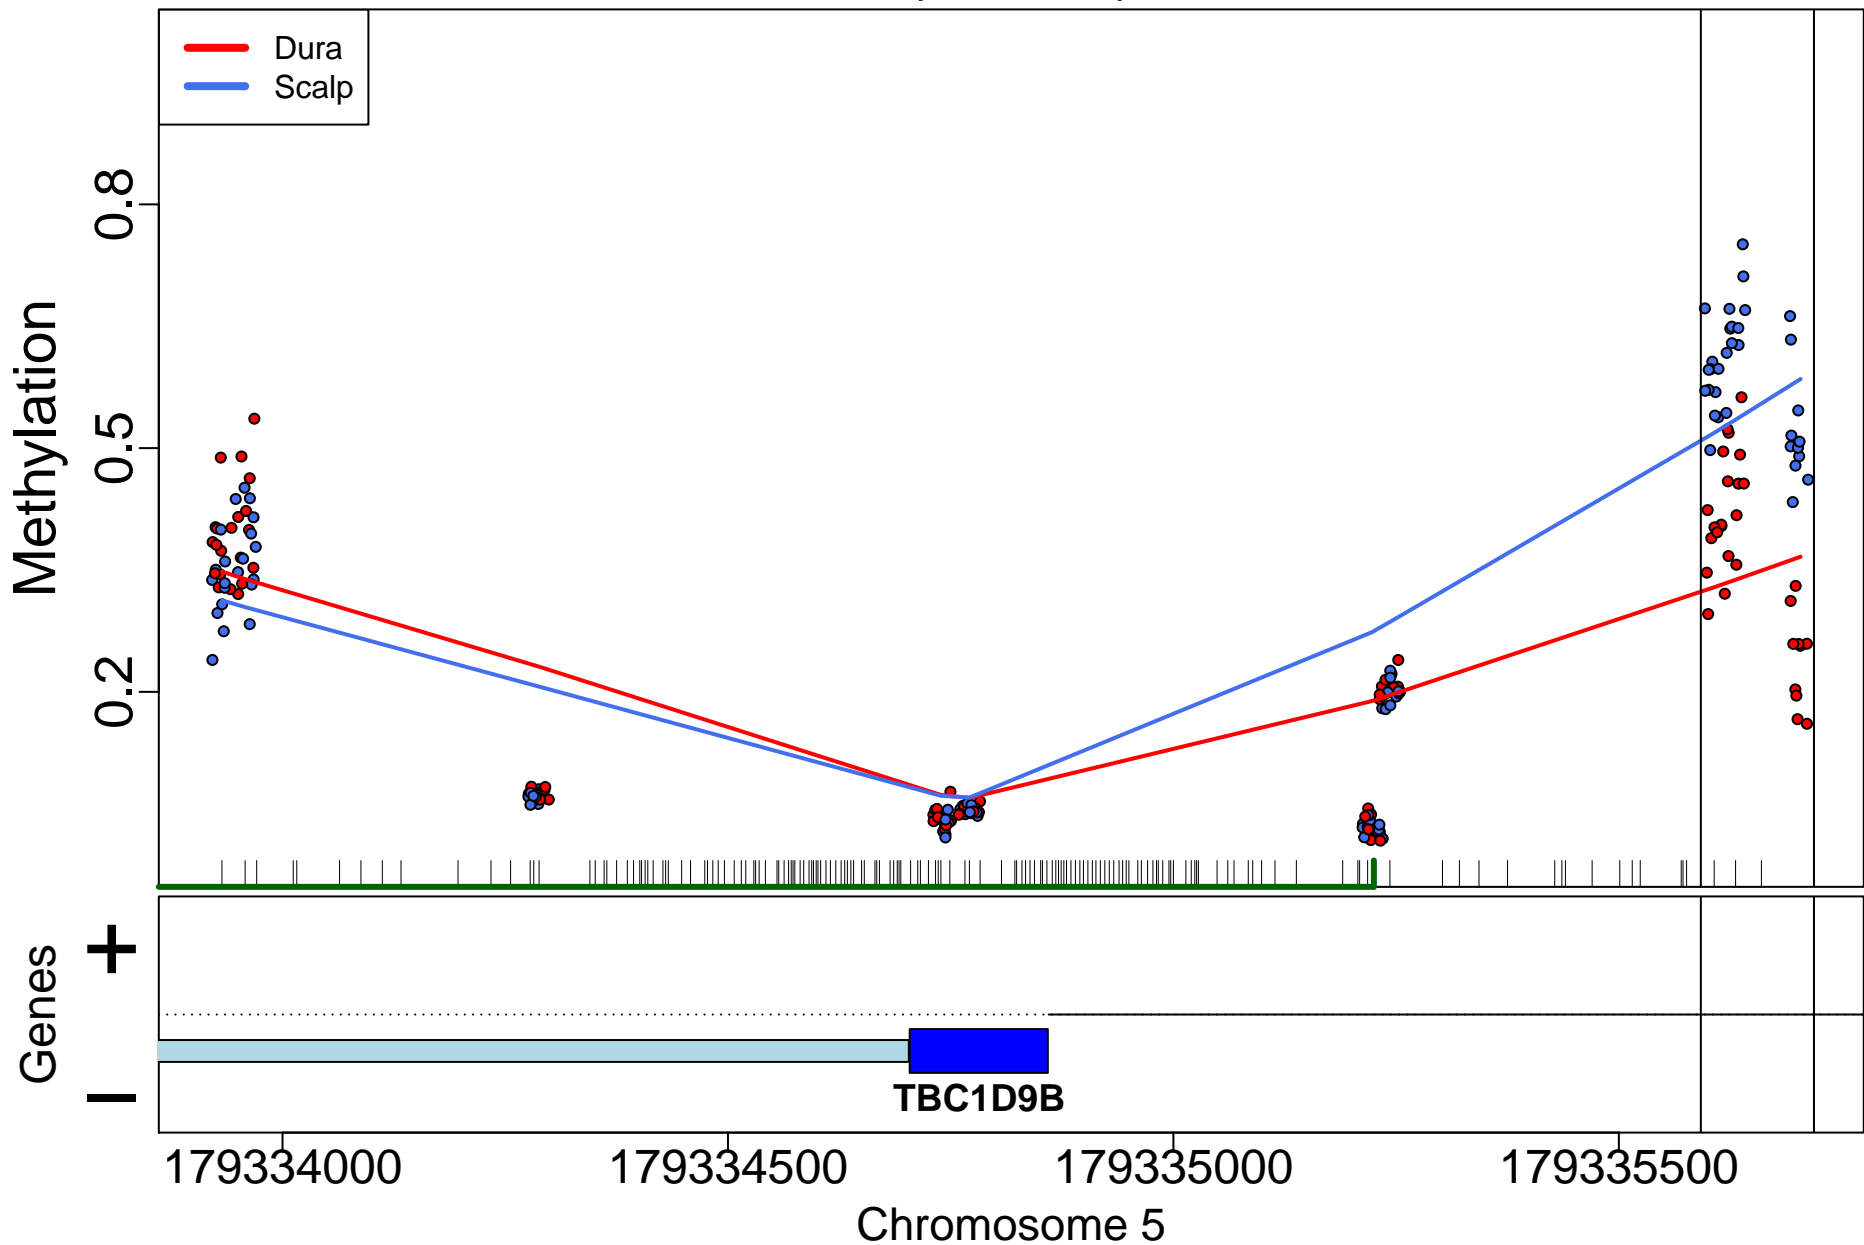

## PTPRN2; 1032216bp from tss:inside intron

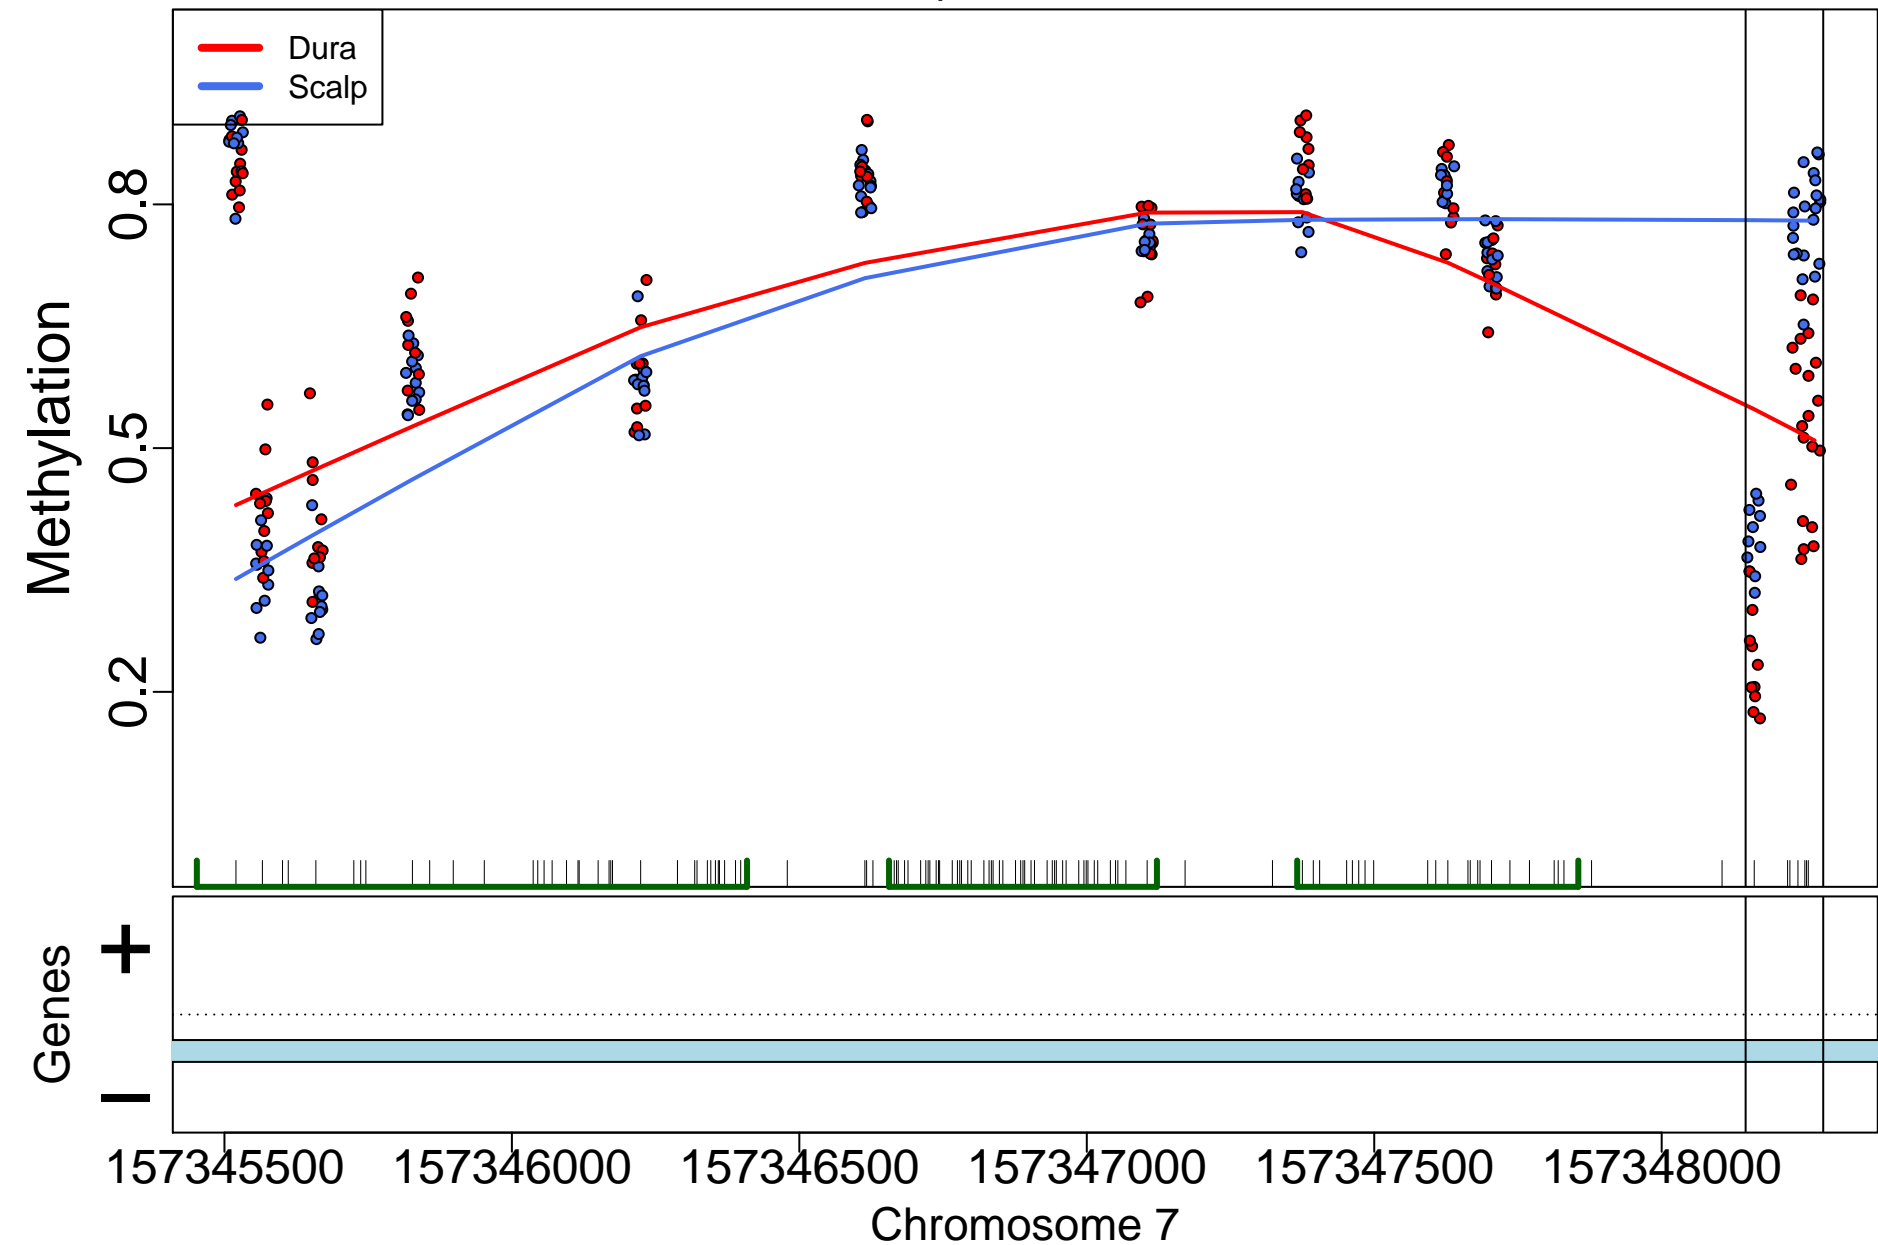

TUFT1; 655bp from tss:inside intron

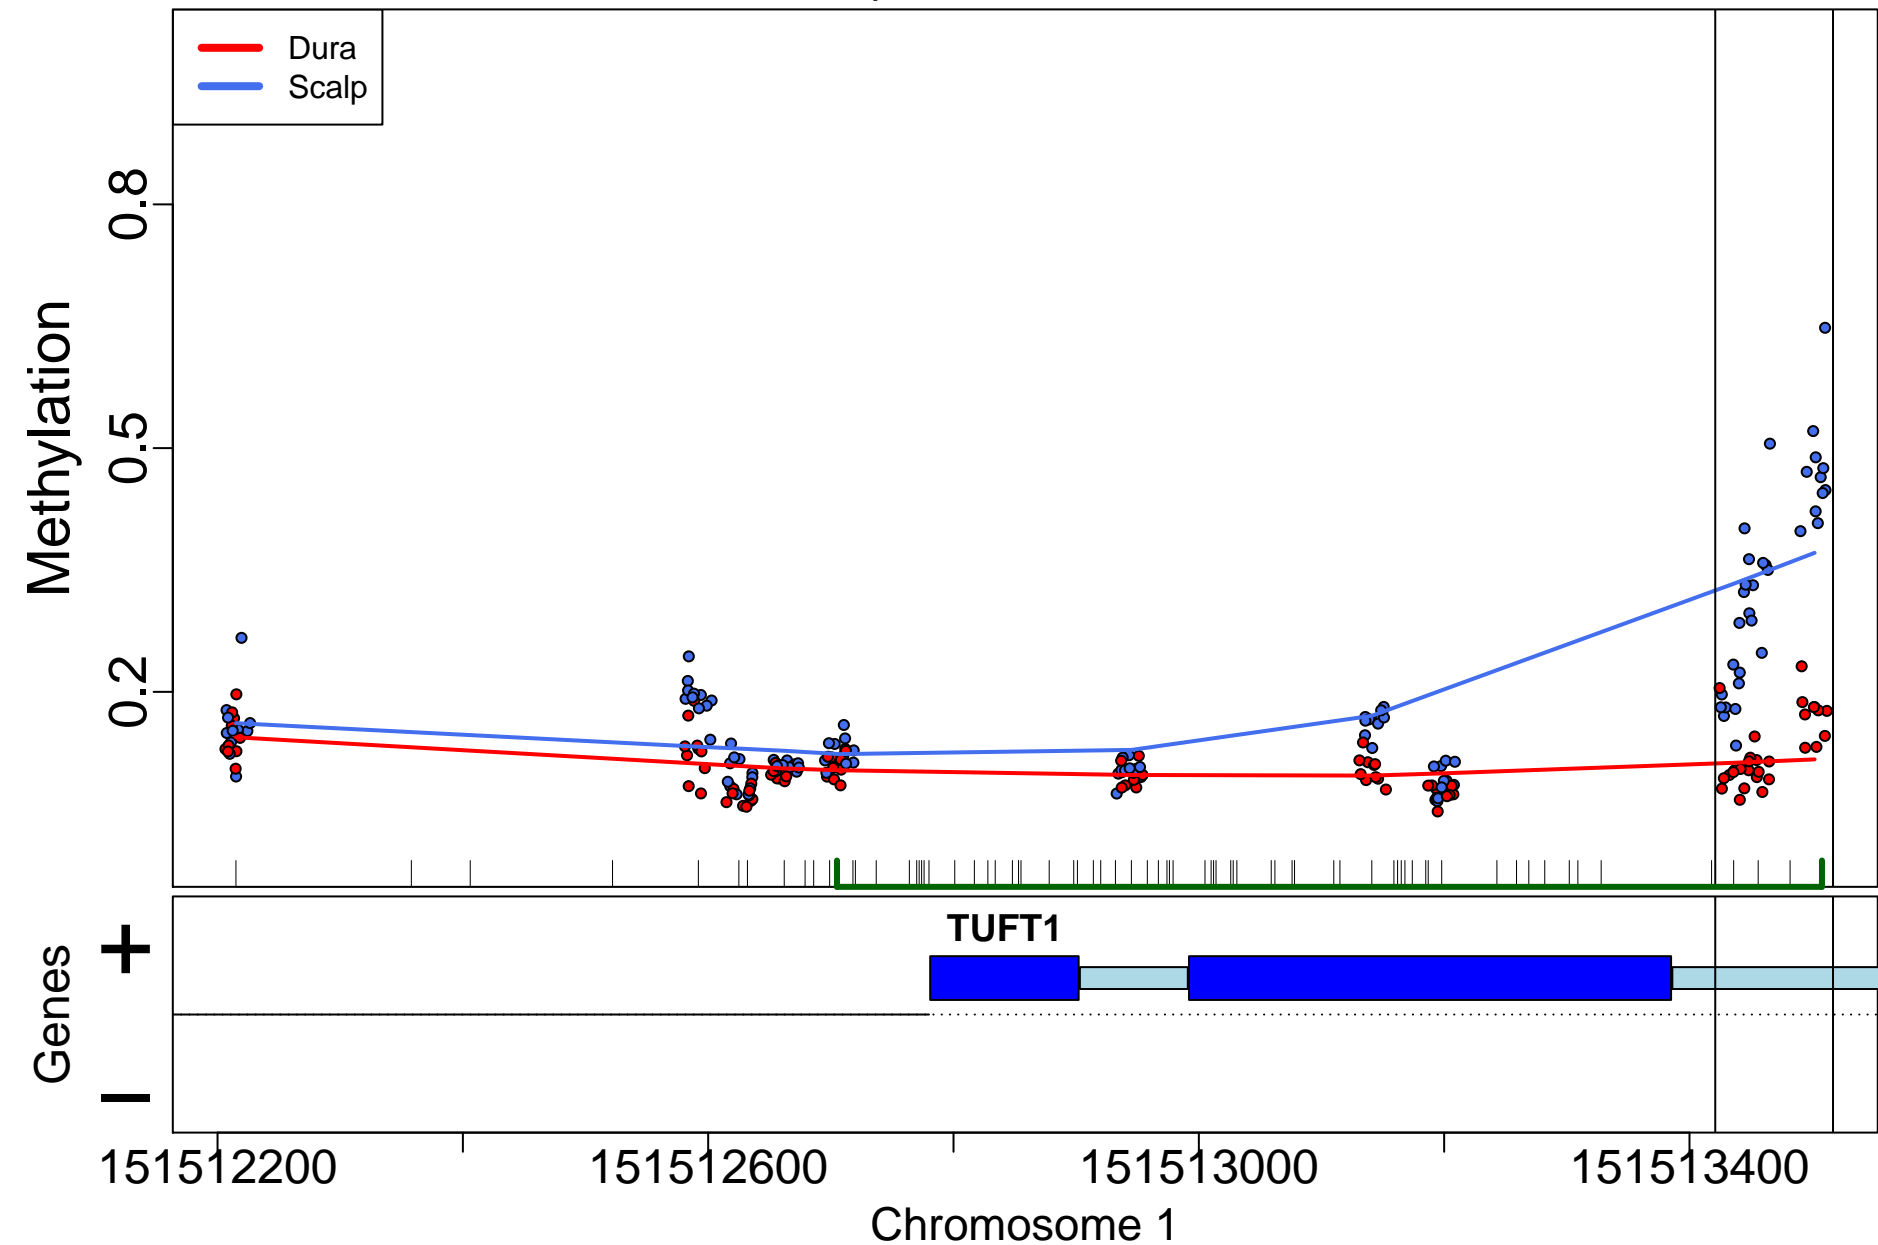

## ACBD3; 74820bp from tss:downstream

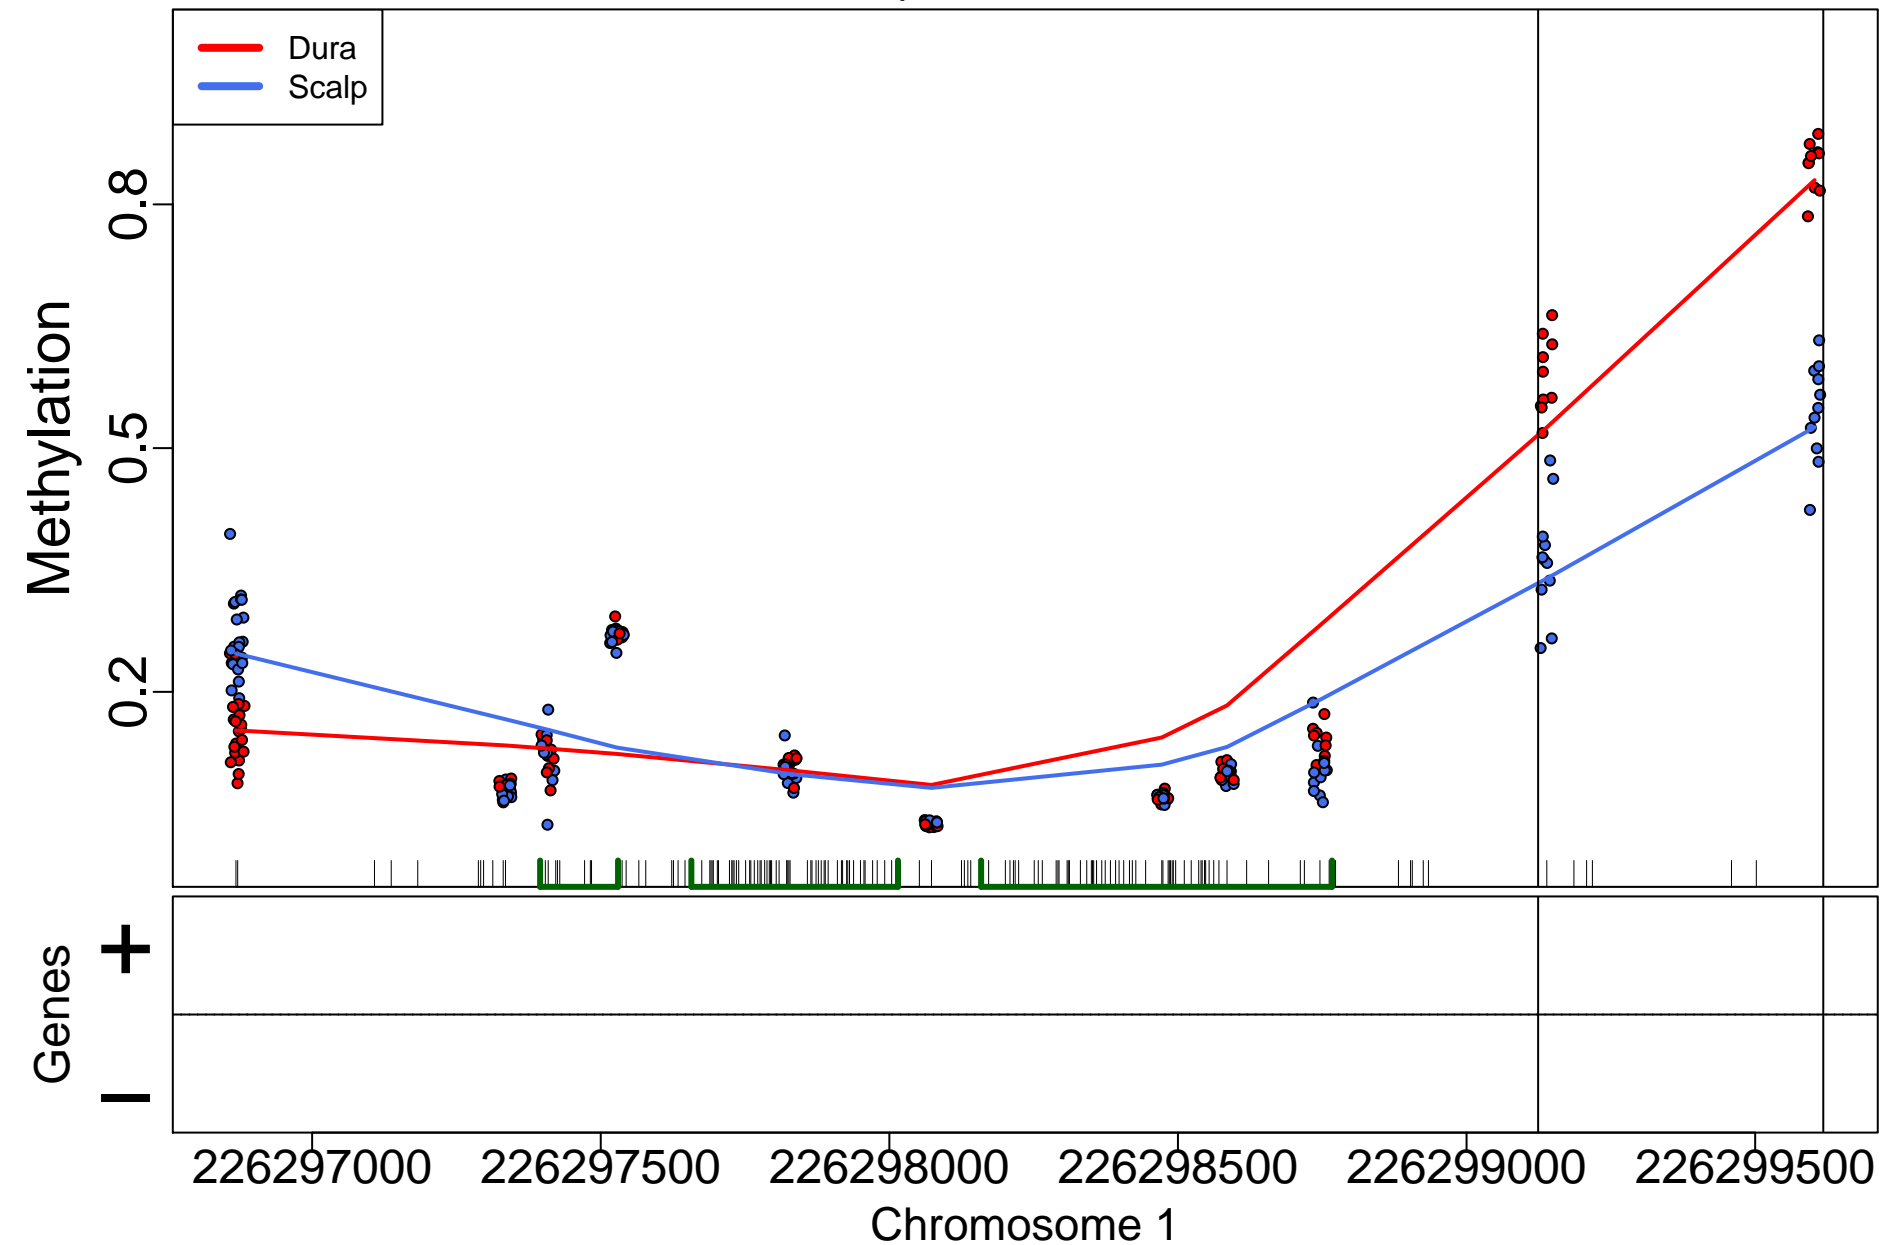

TP53INP1; 737bp from tss:promoter

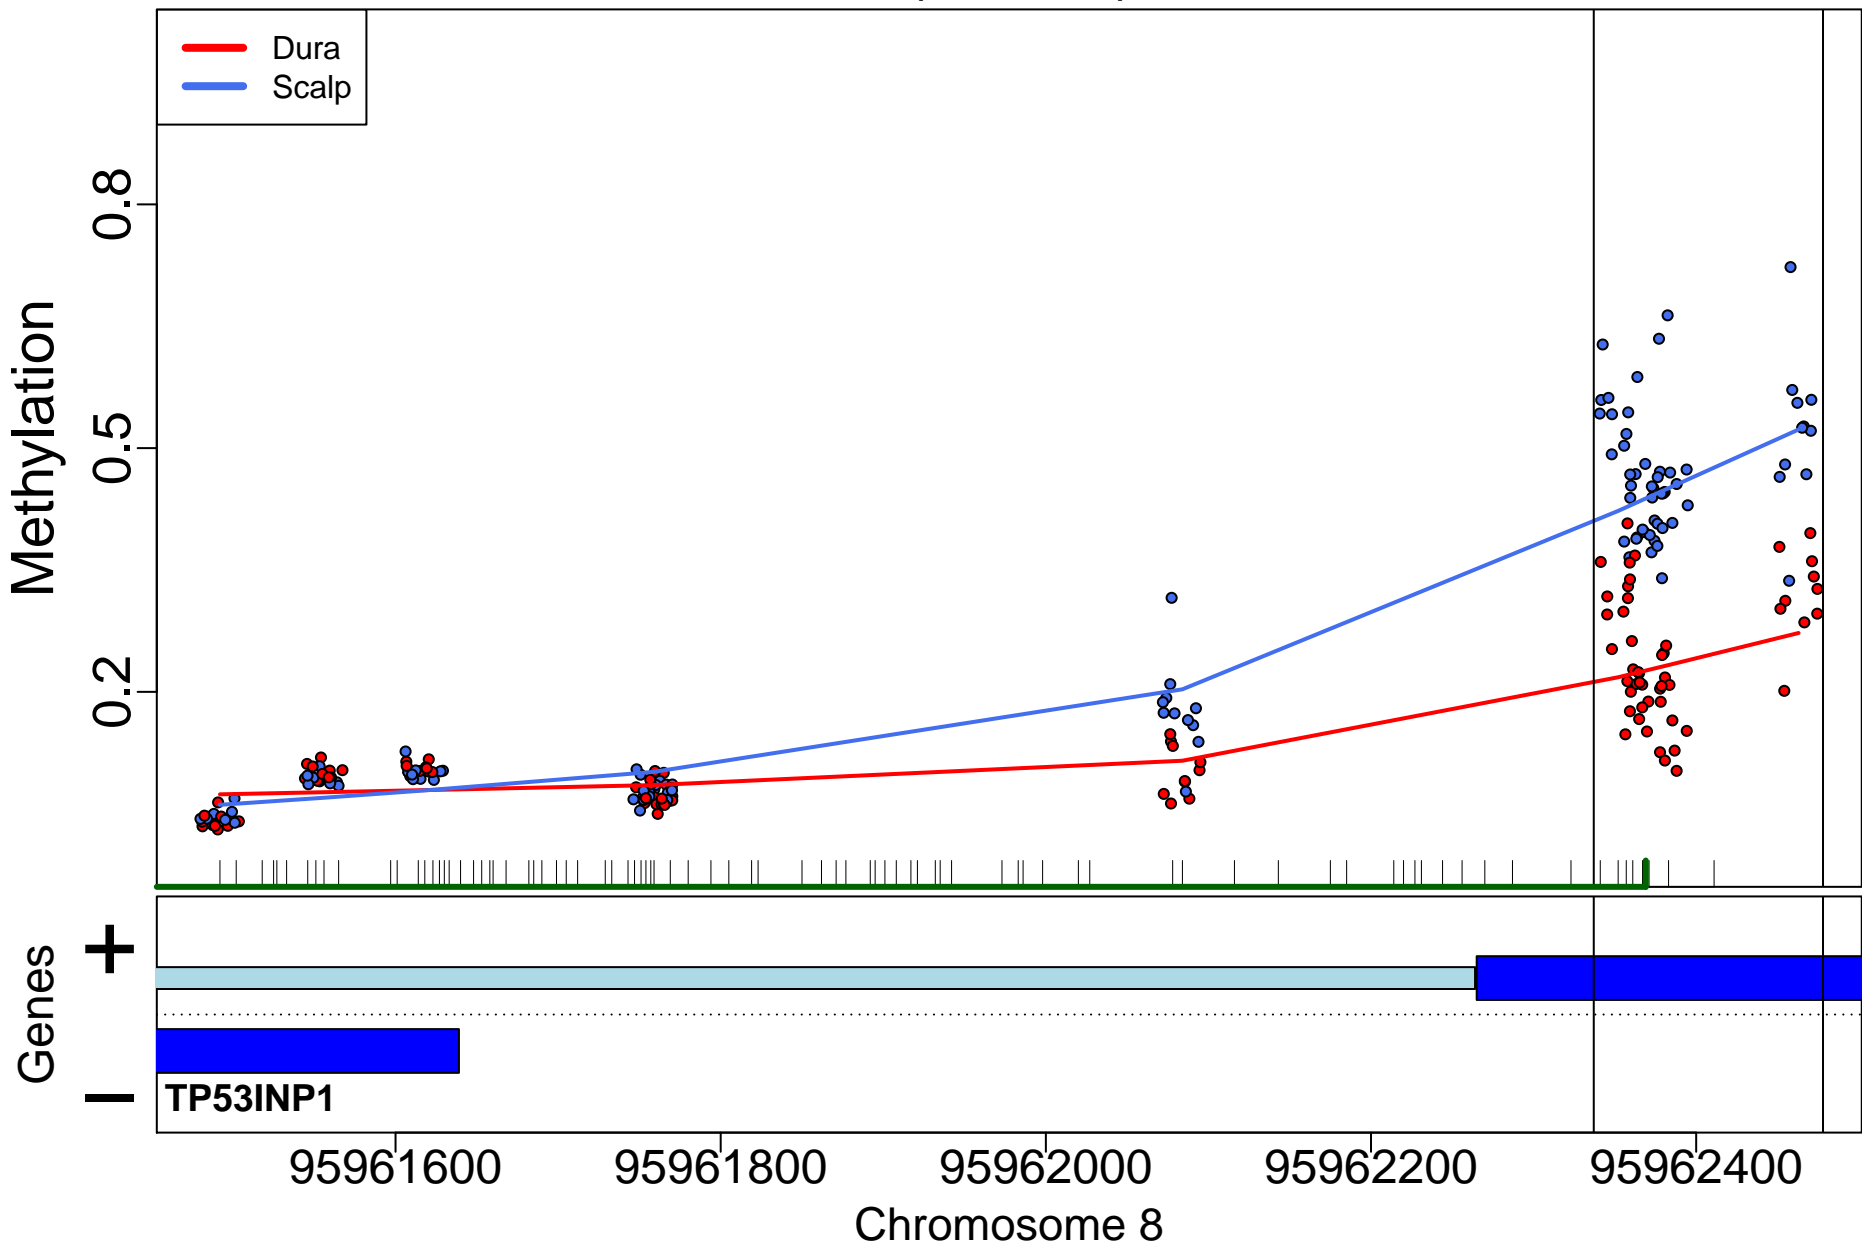



MPZL2; 0bp from tss:overlaps 5'

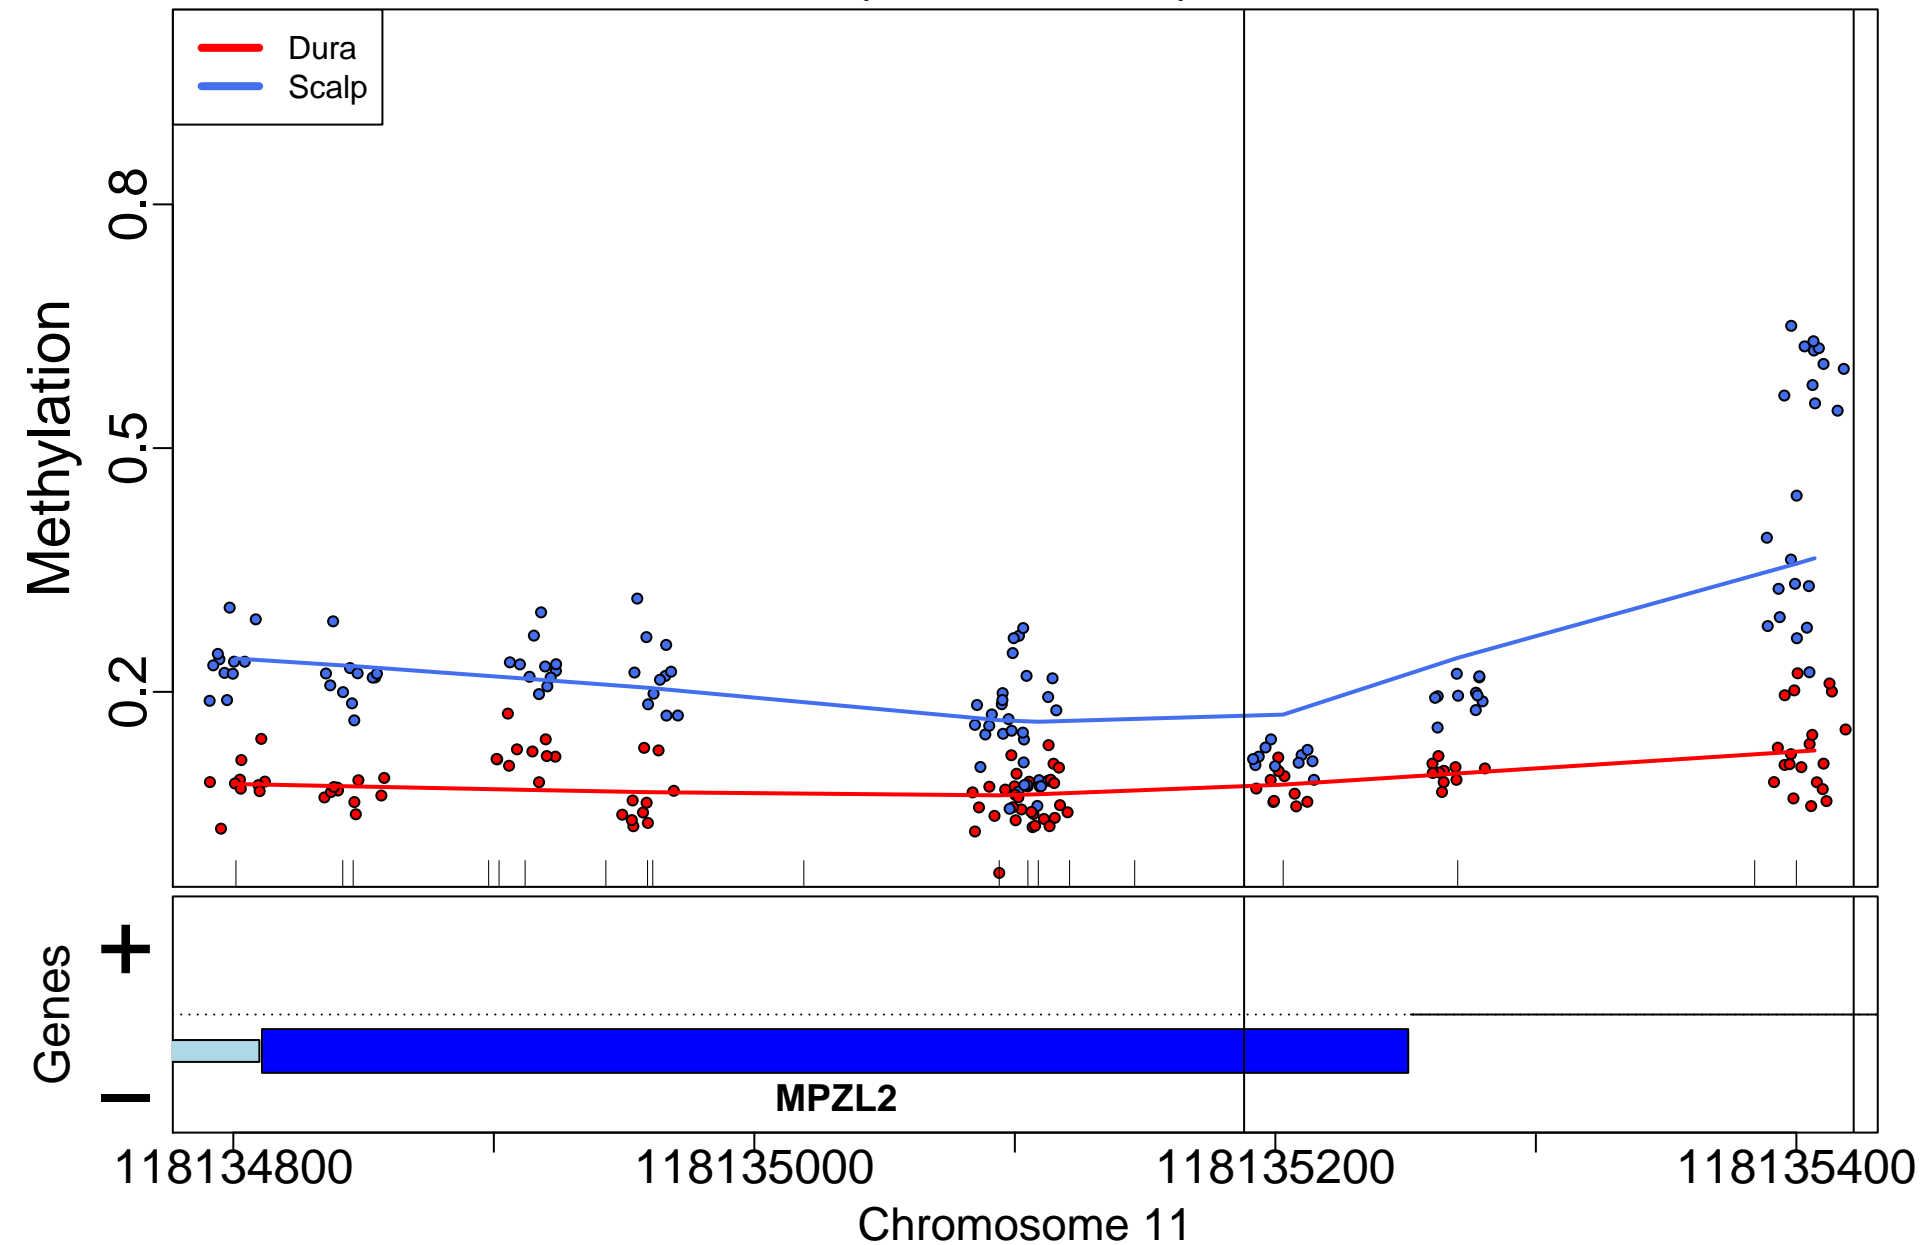

FZD5; 1462bp from tss:promoter

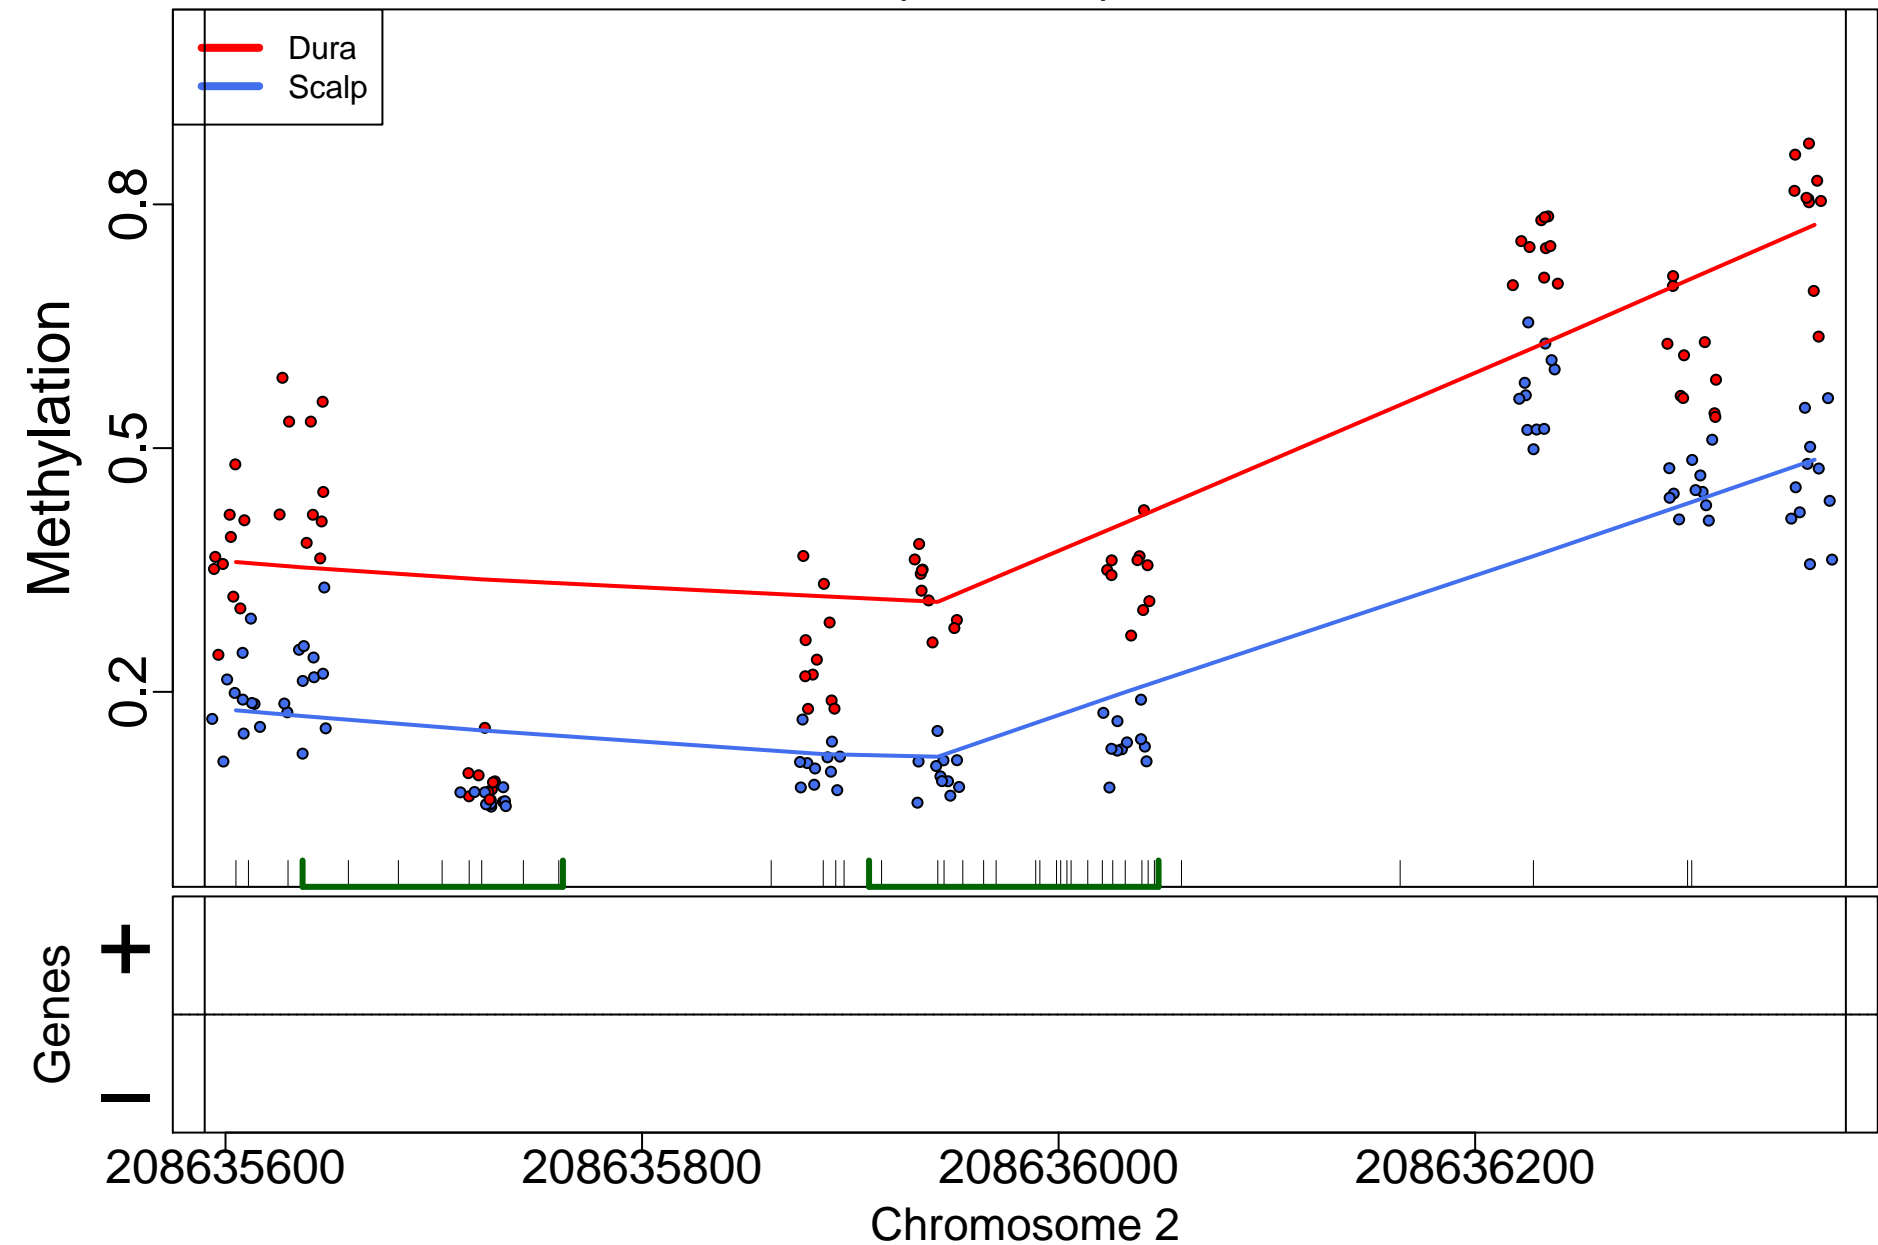

WDR52; 0bp from tss:overlaps 5'

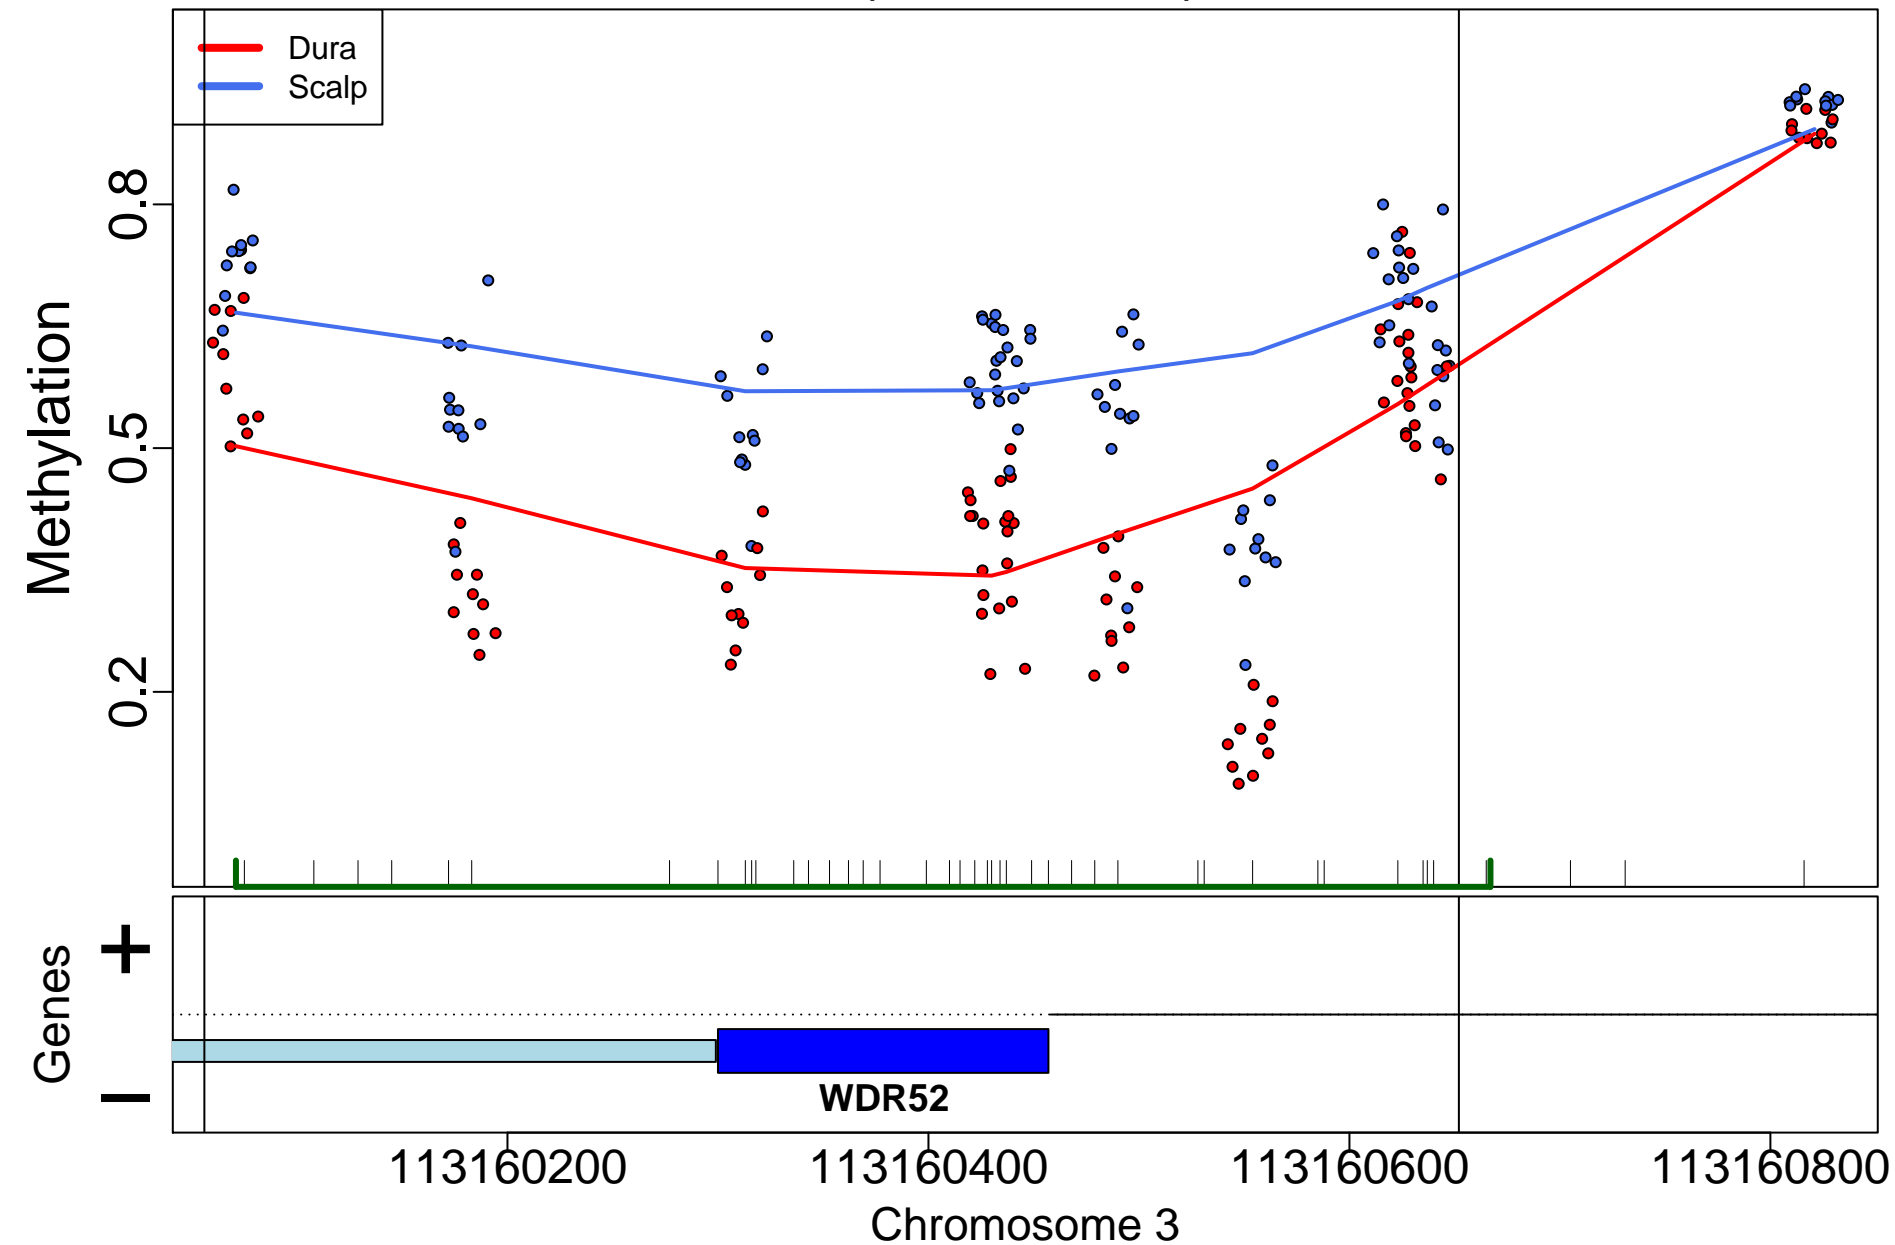

## MIR21; 0bp from tss:NA

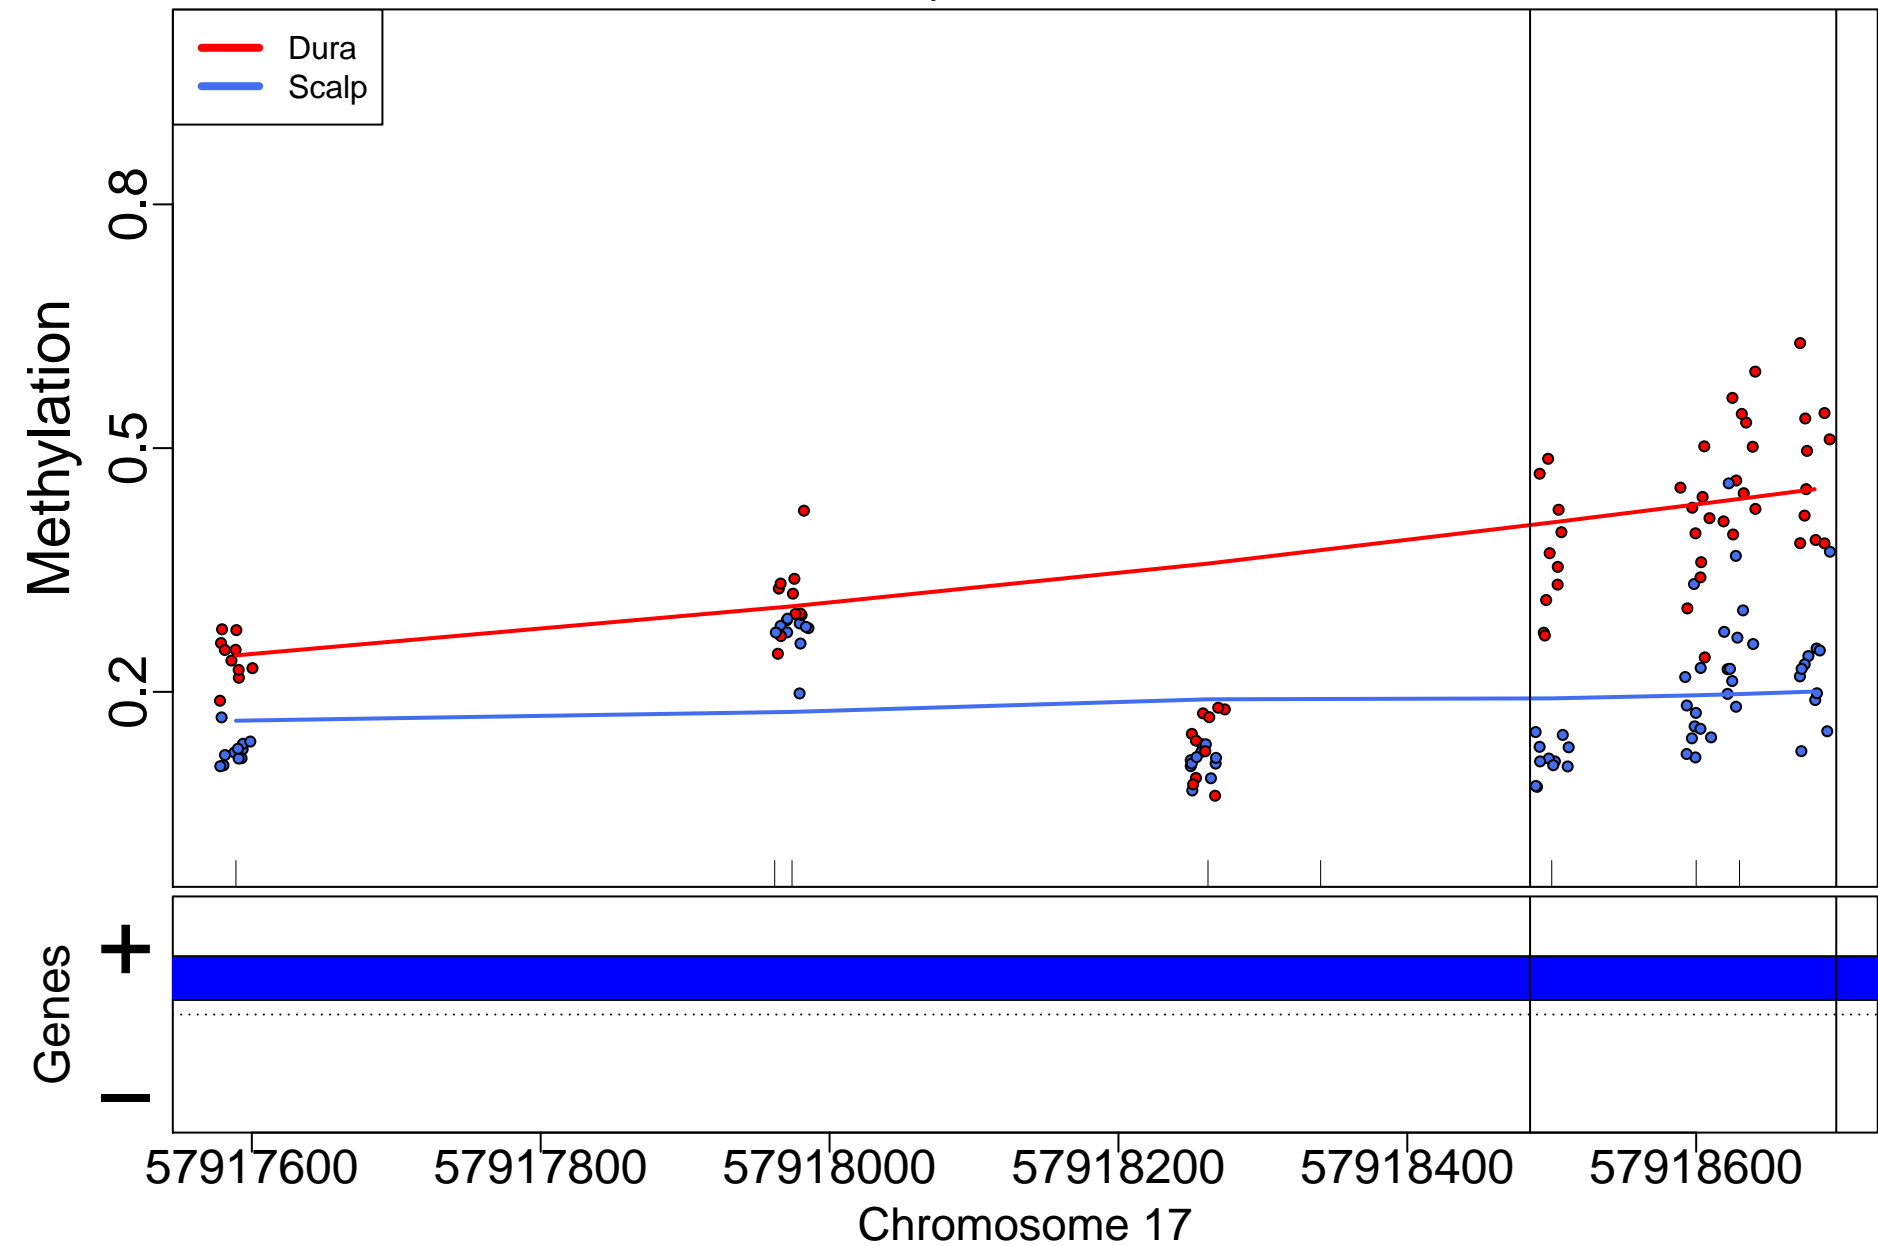

ANKRD26; 452bp from tss:promoter

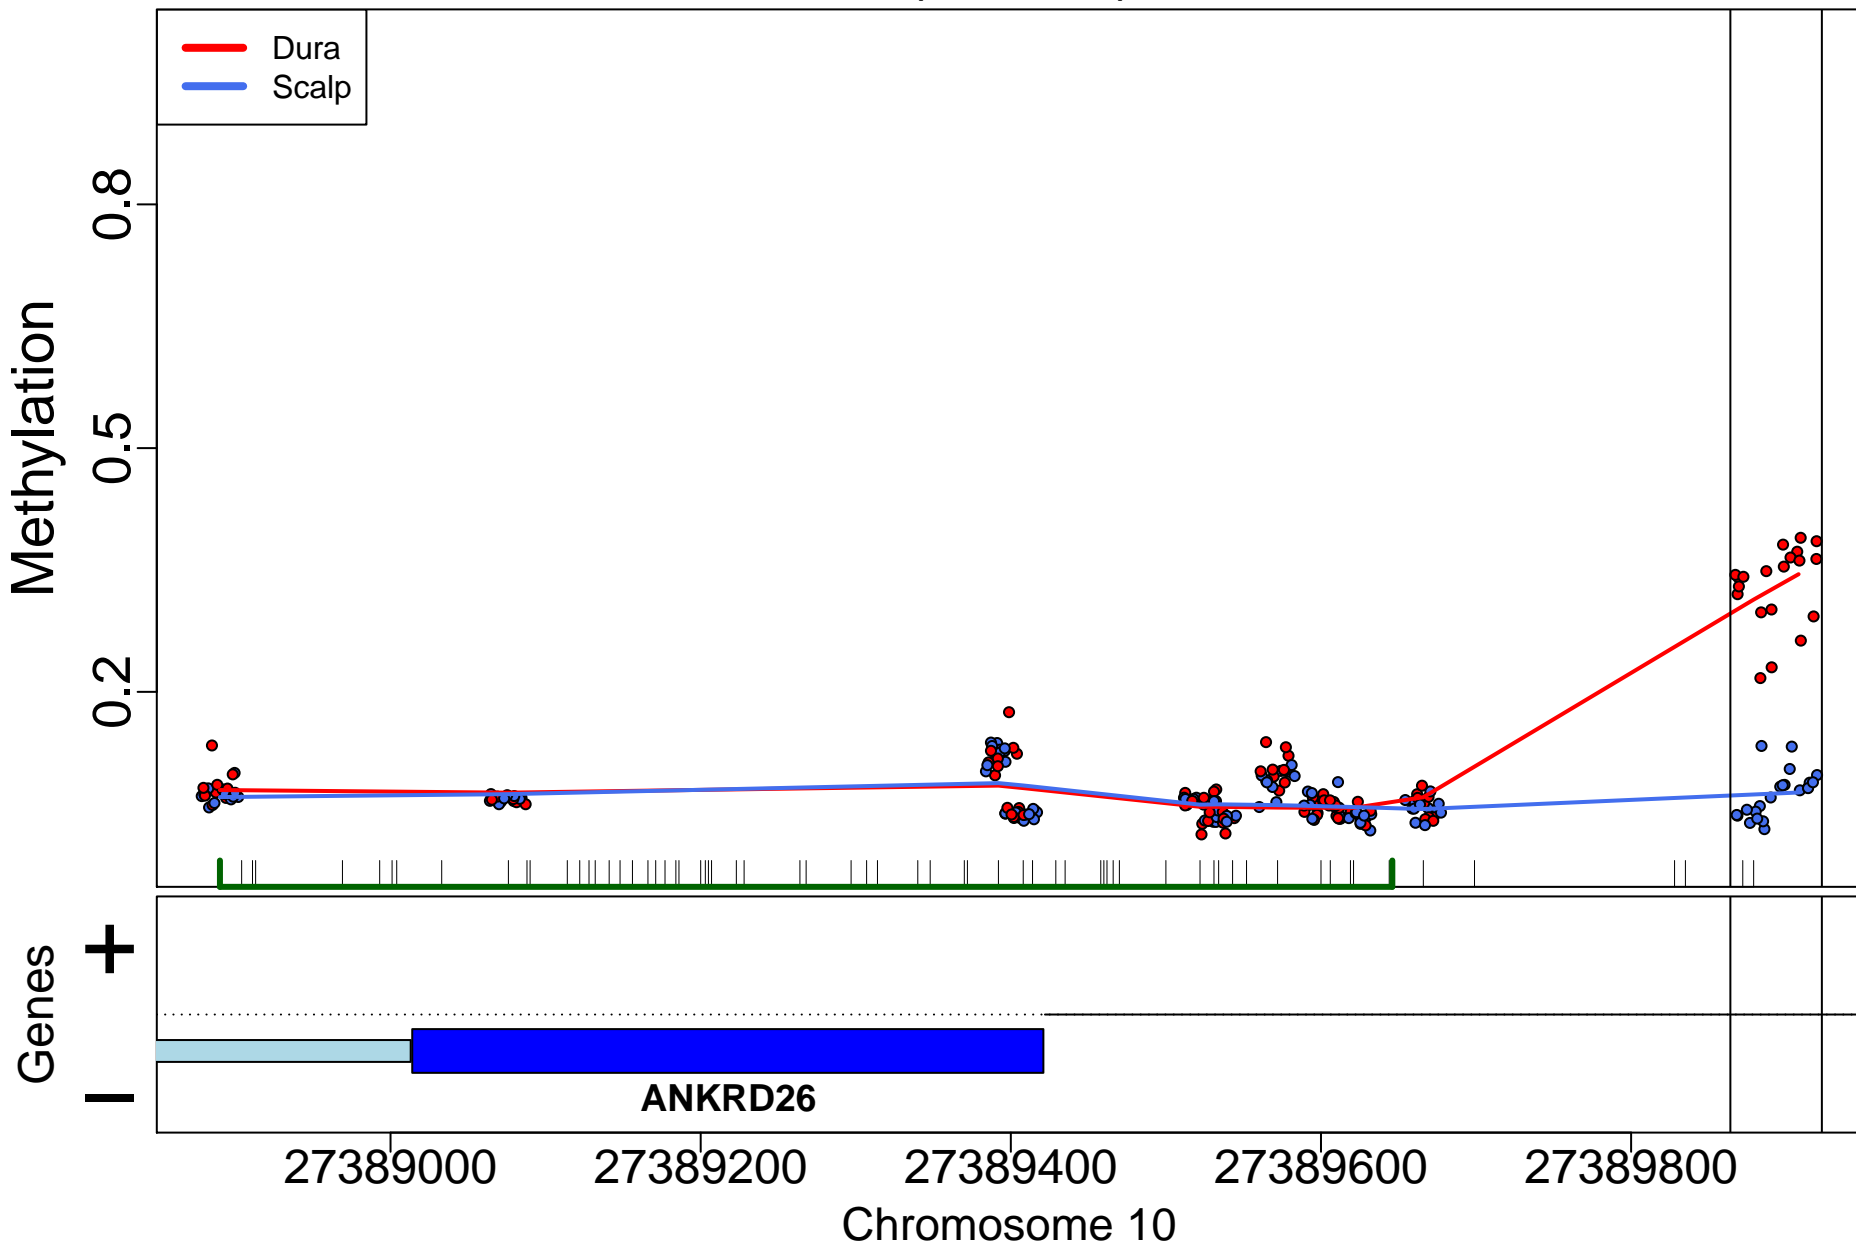

# NMI; 272bp from tss:promoter

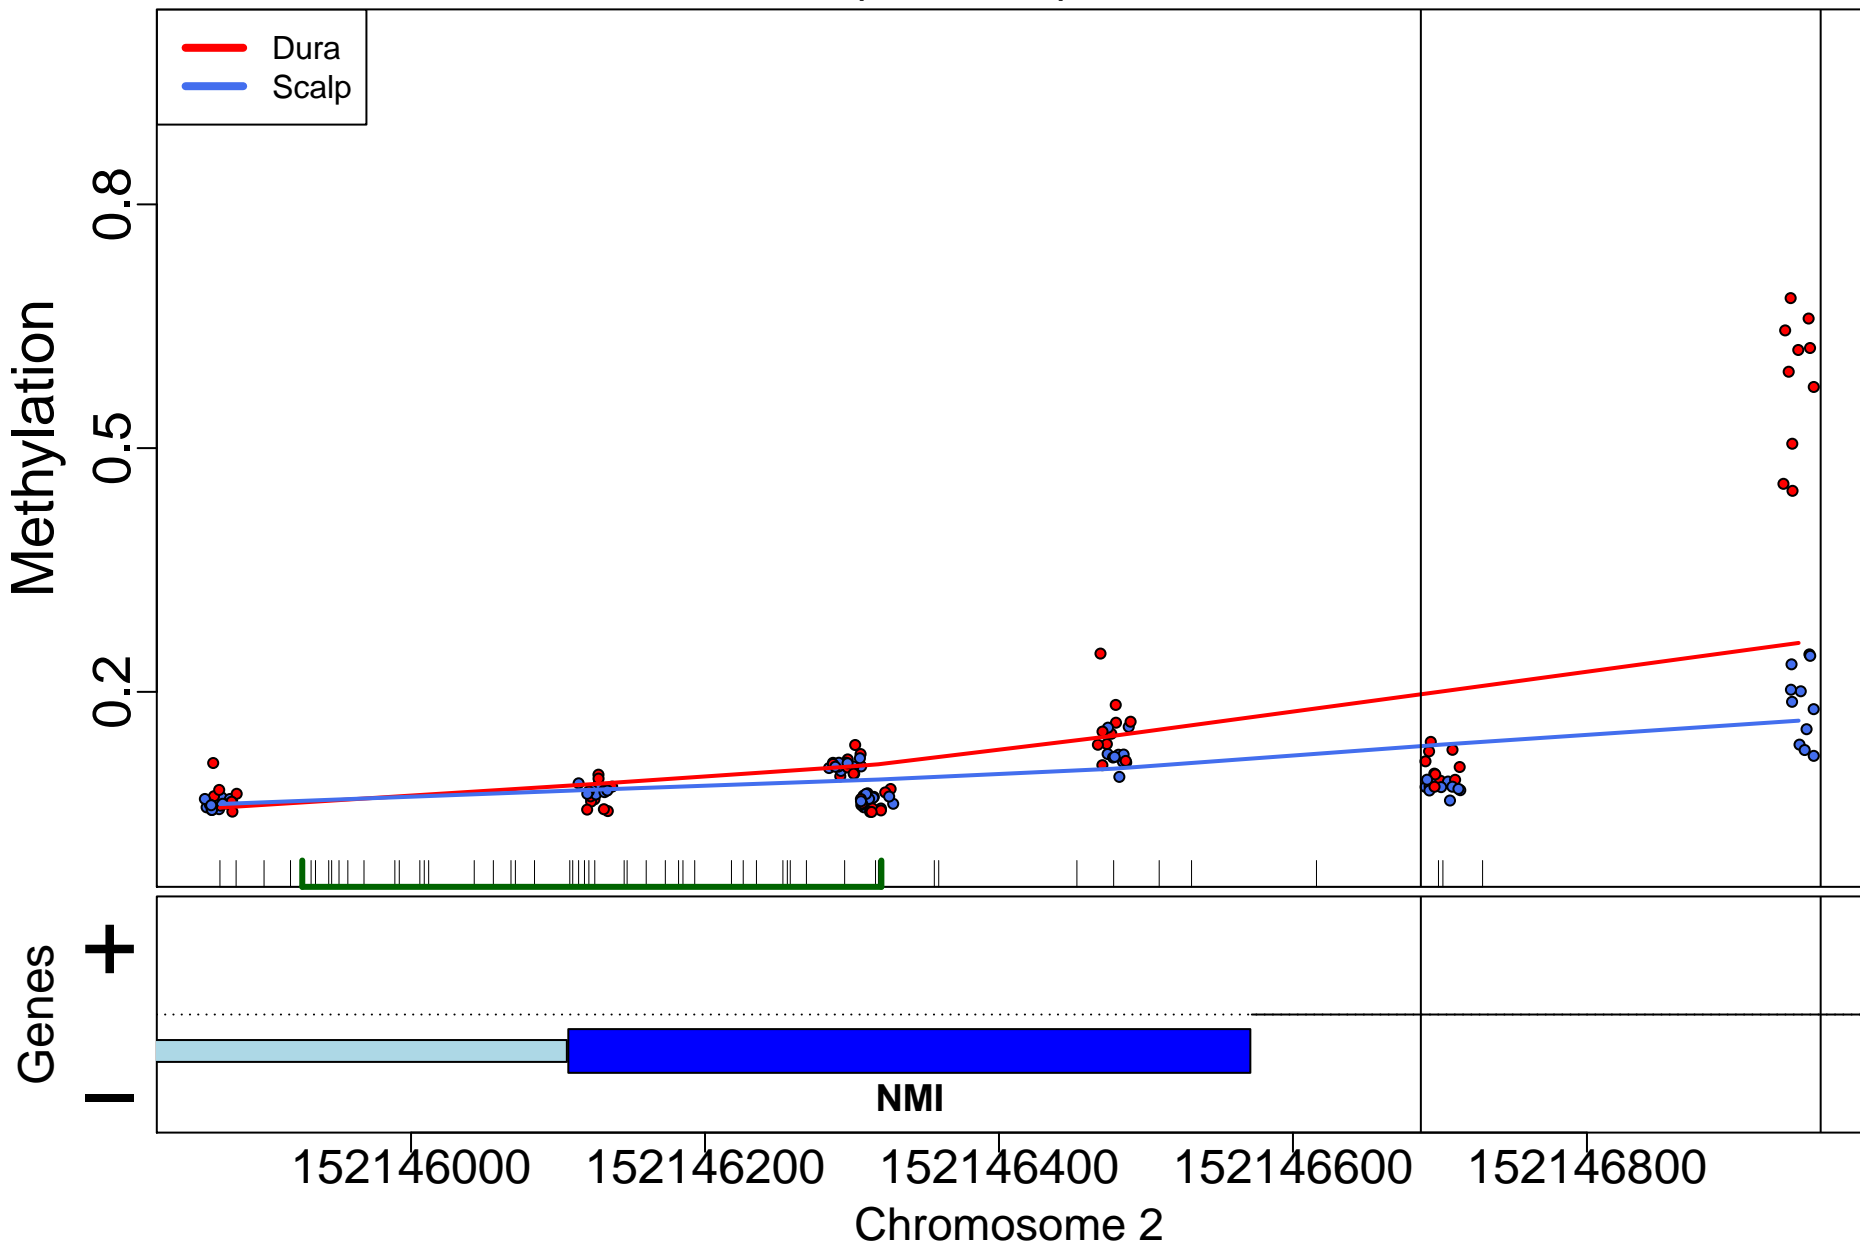

NSMCE4A; 385bp from tss:promoter

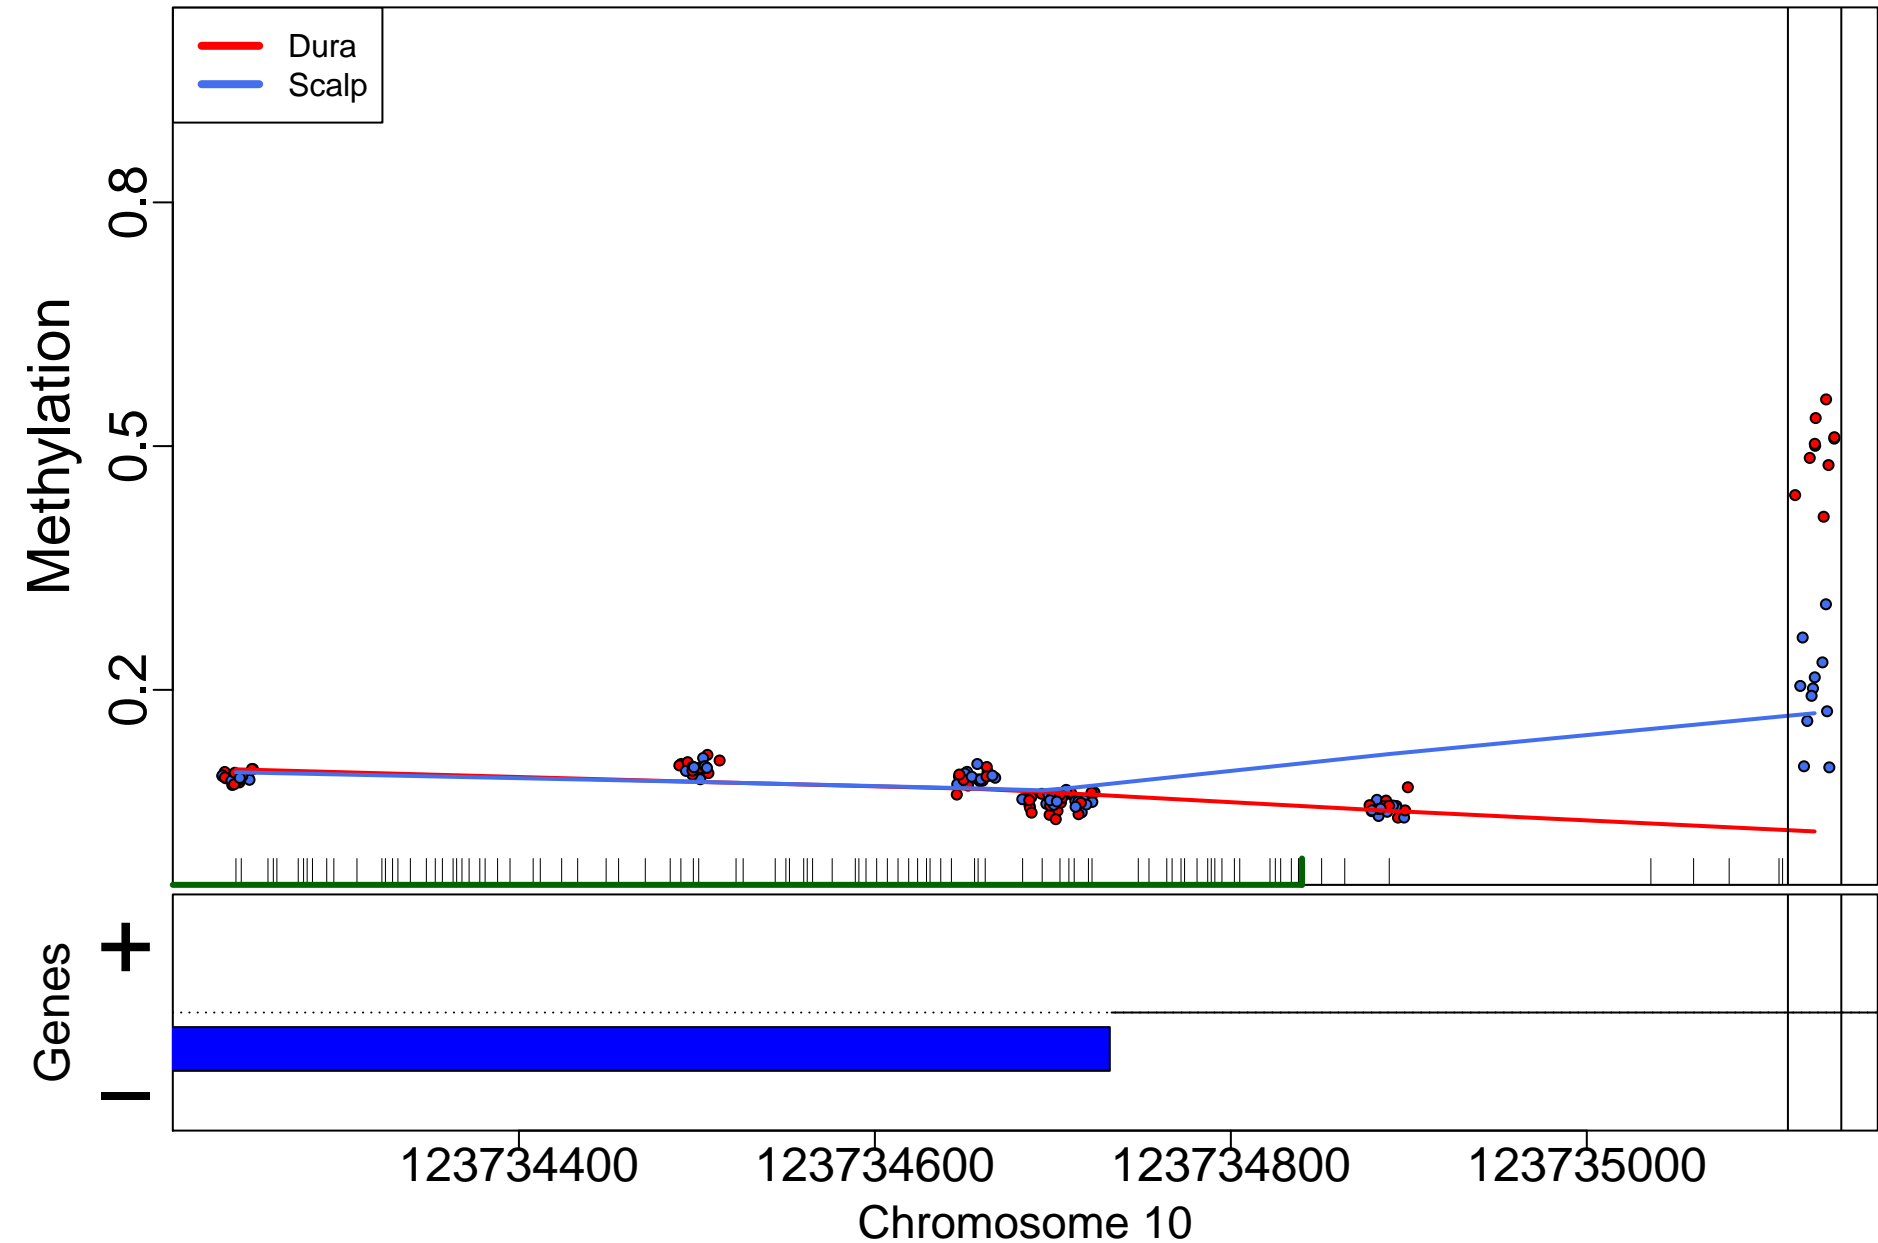

BST2; 624bp from tss:promoter

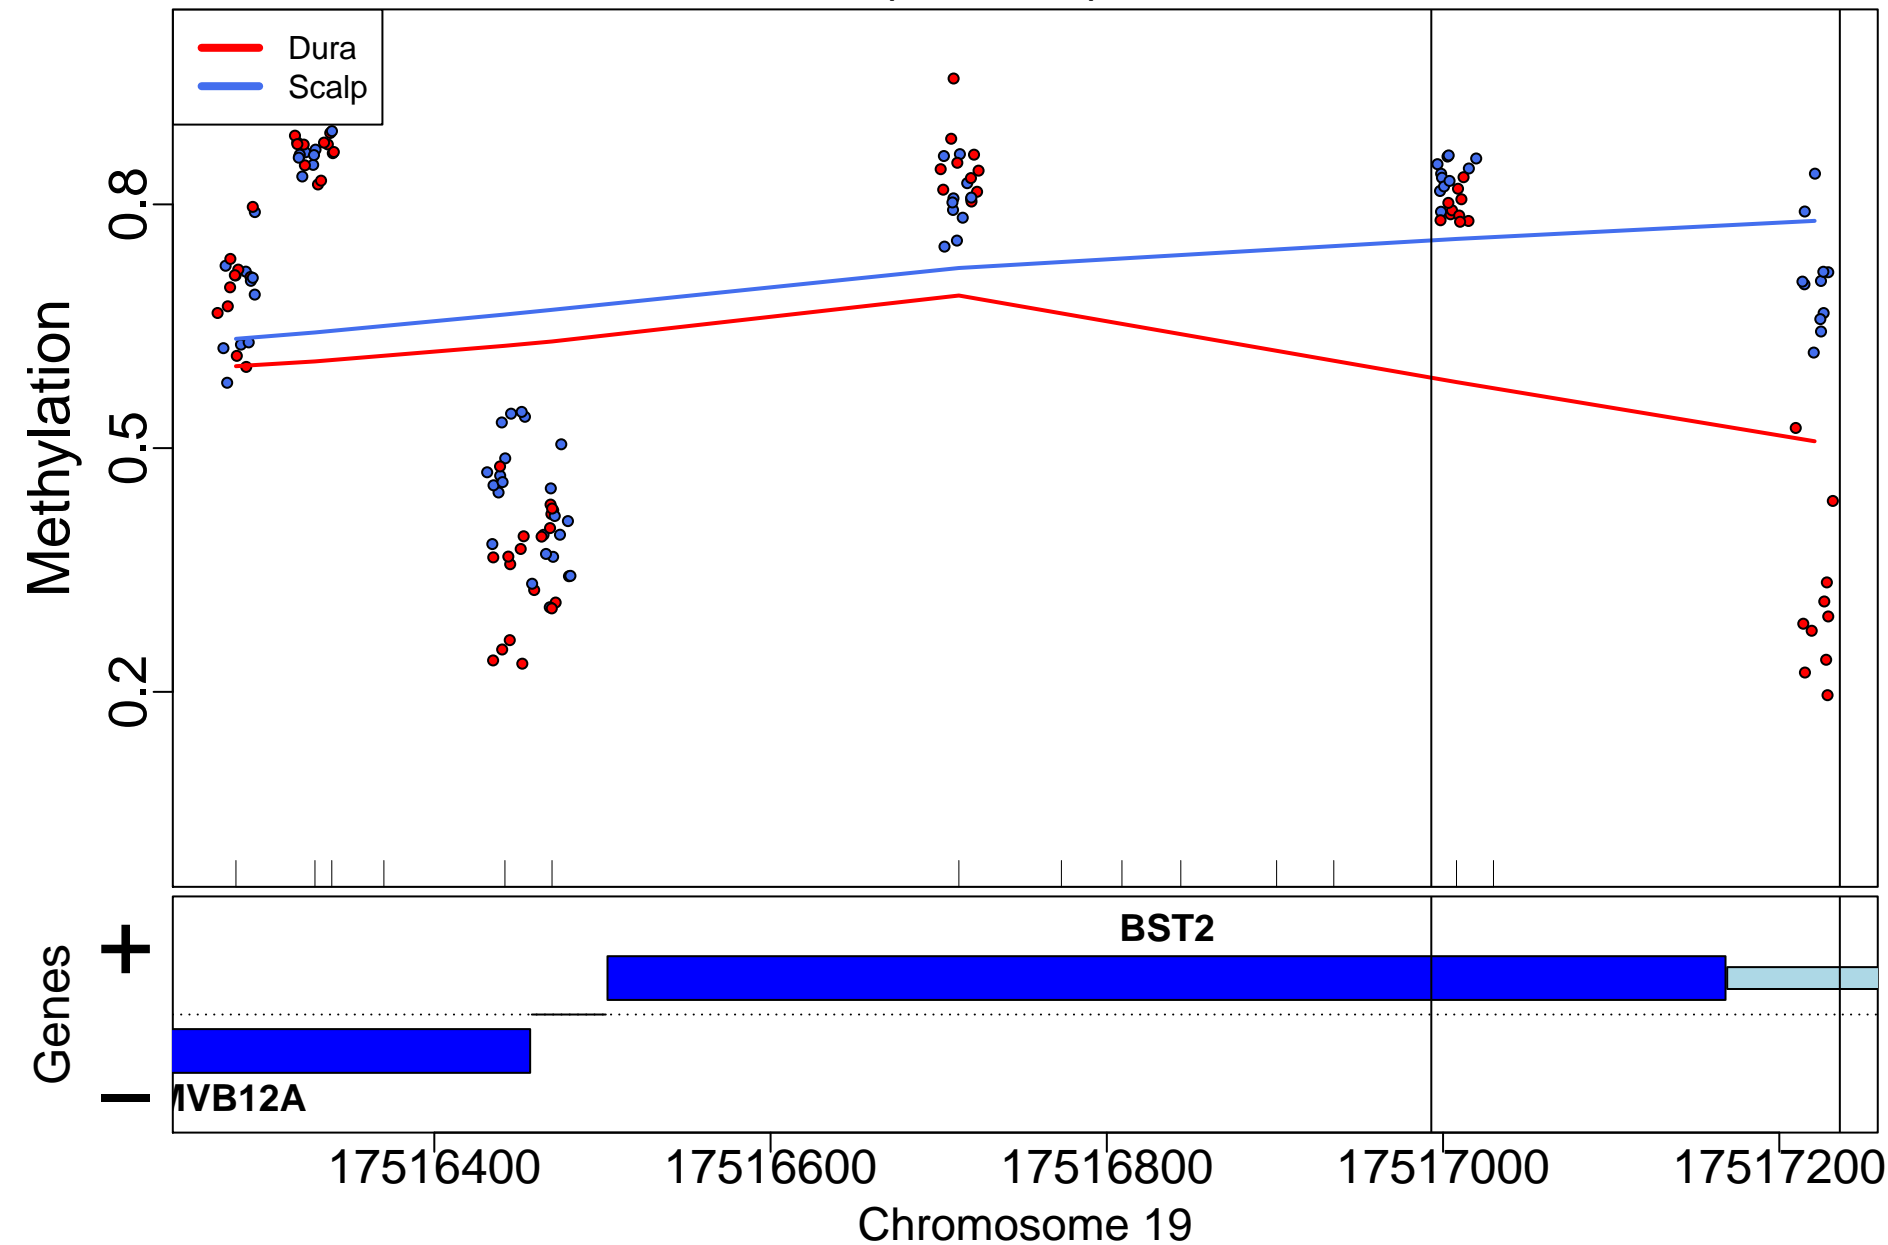



ADAM32; 0bp from tss:overlaps 5'

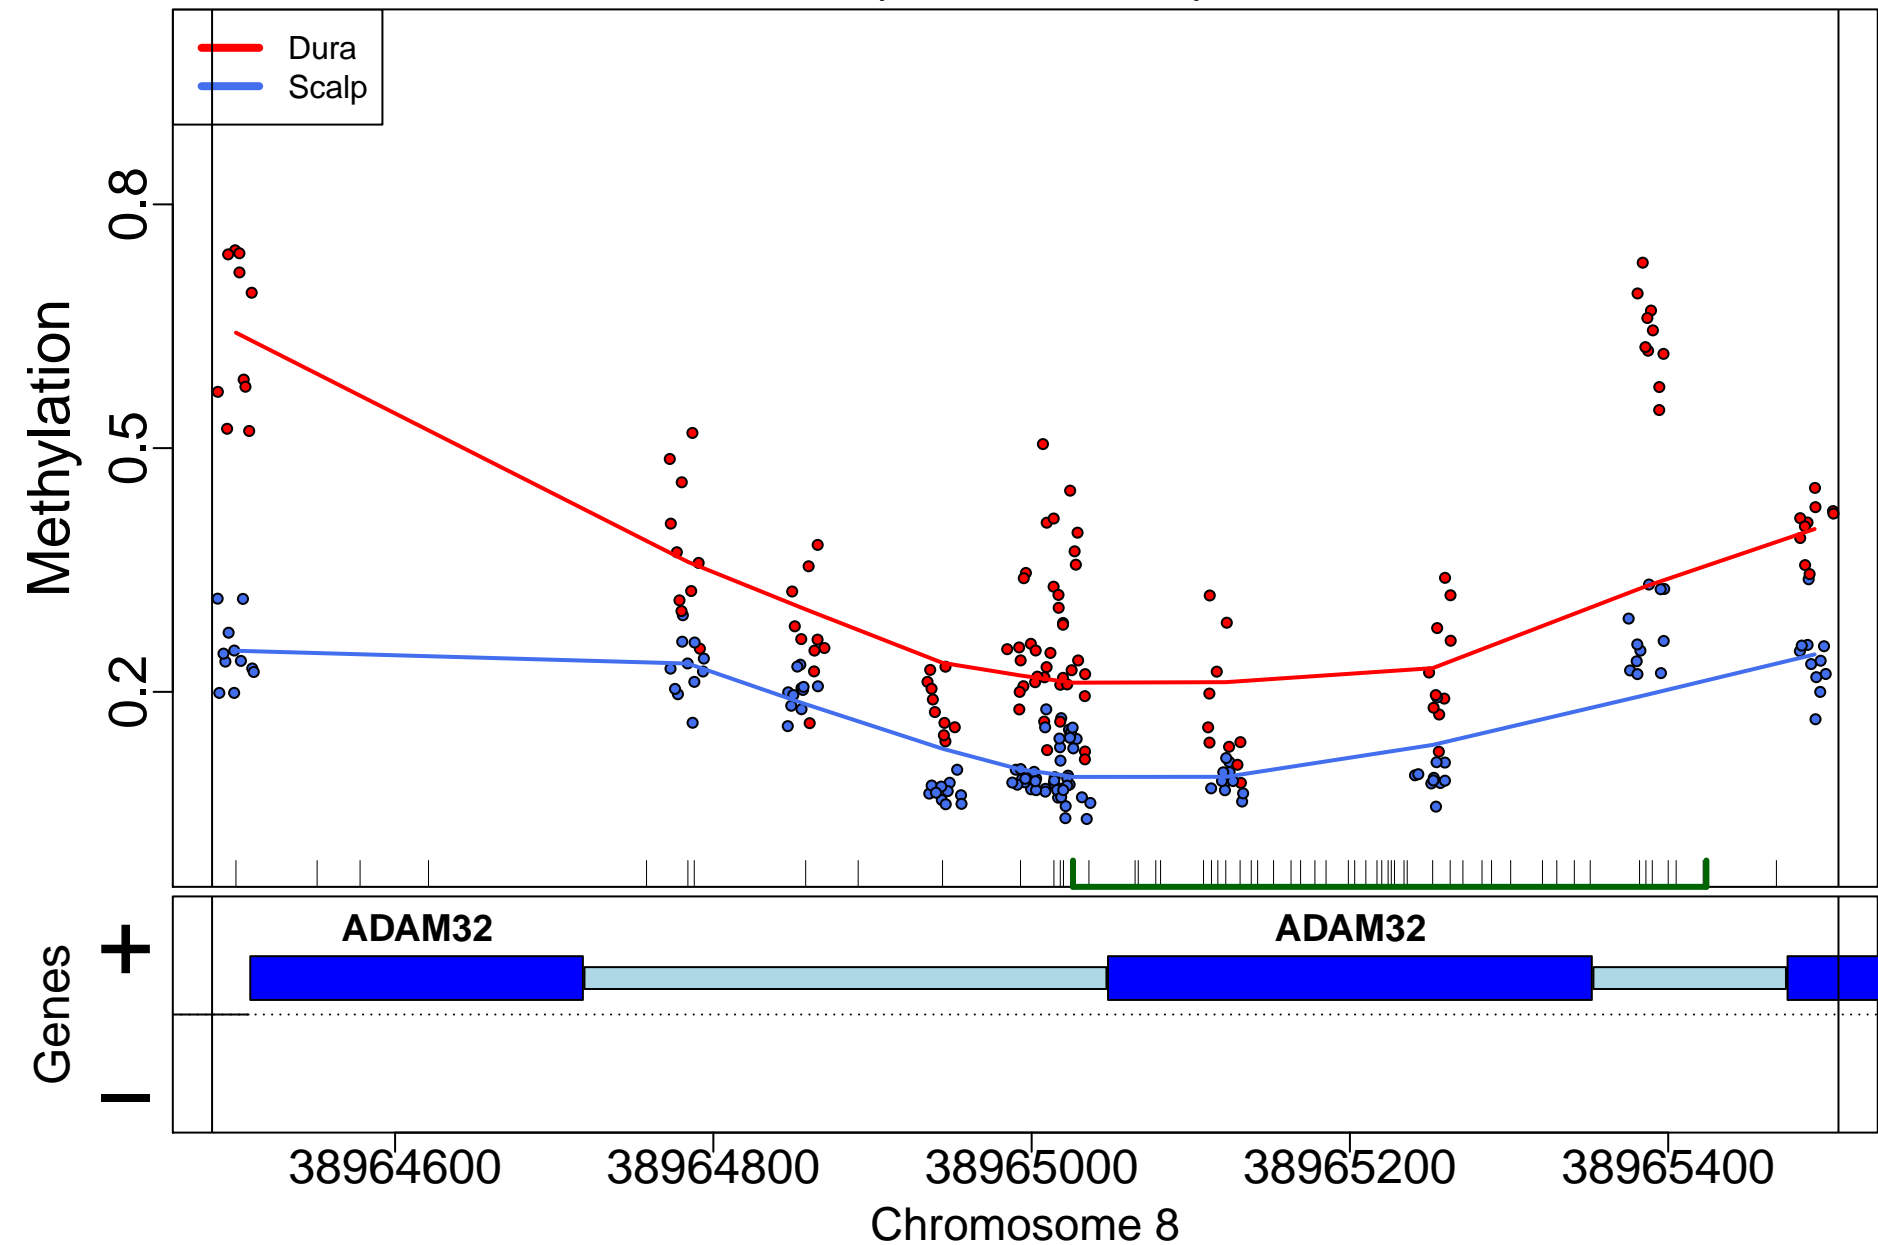

TRIM40; 8707bp from tss:upstream

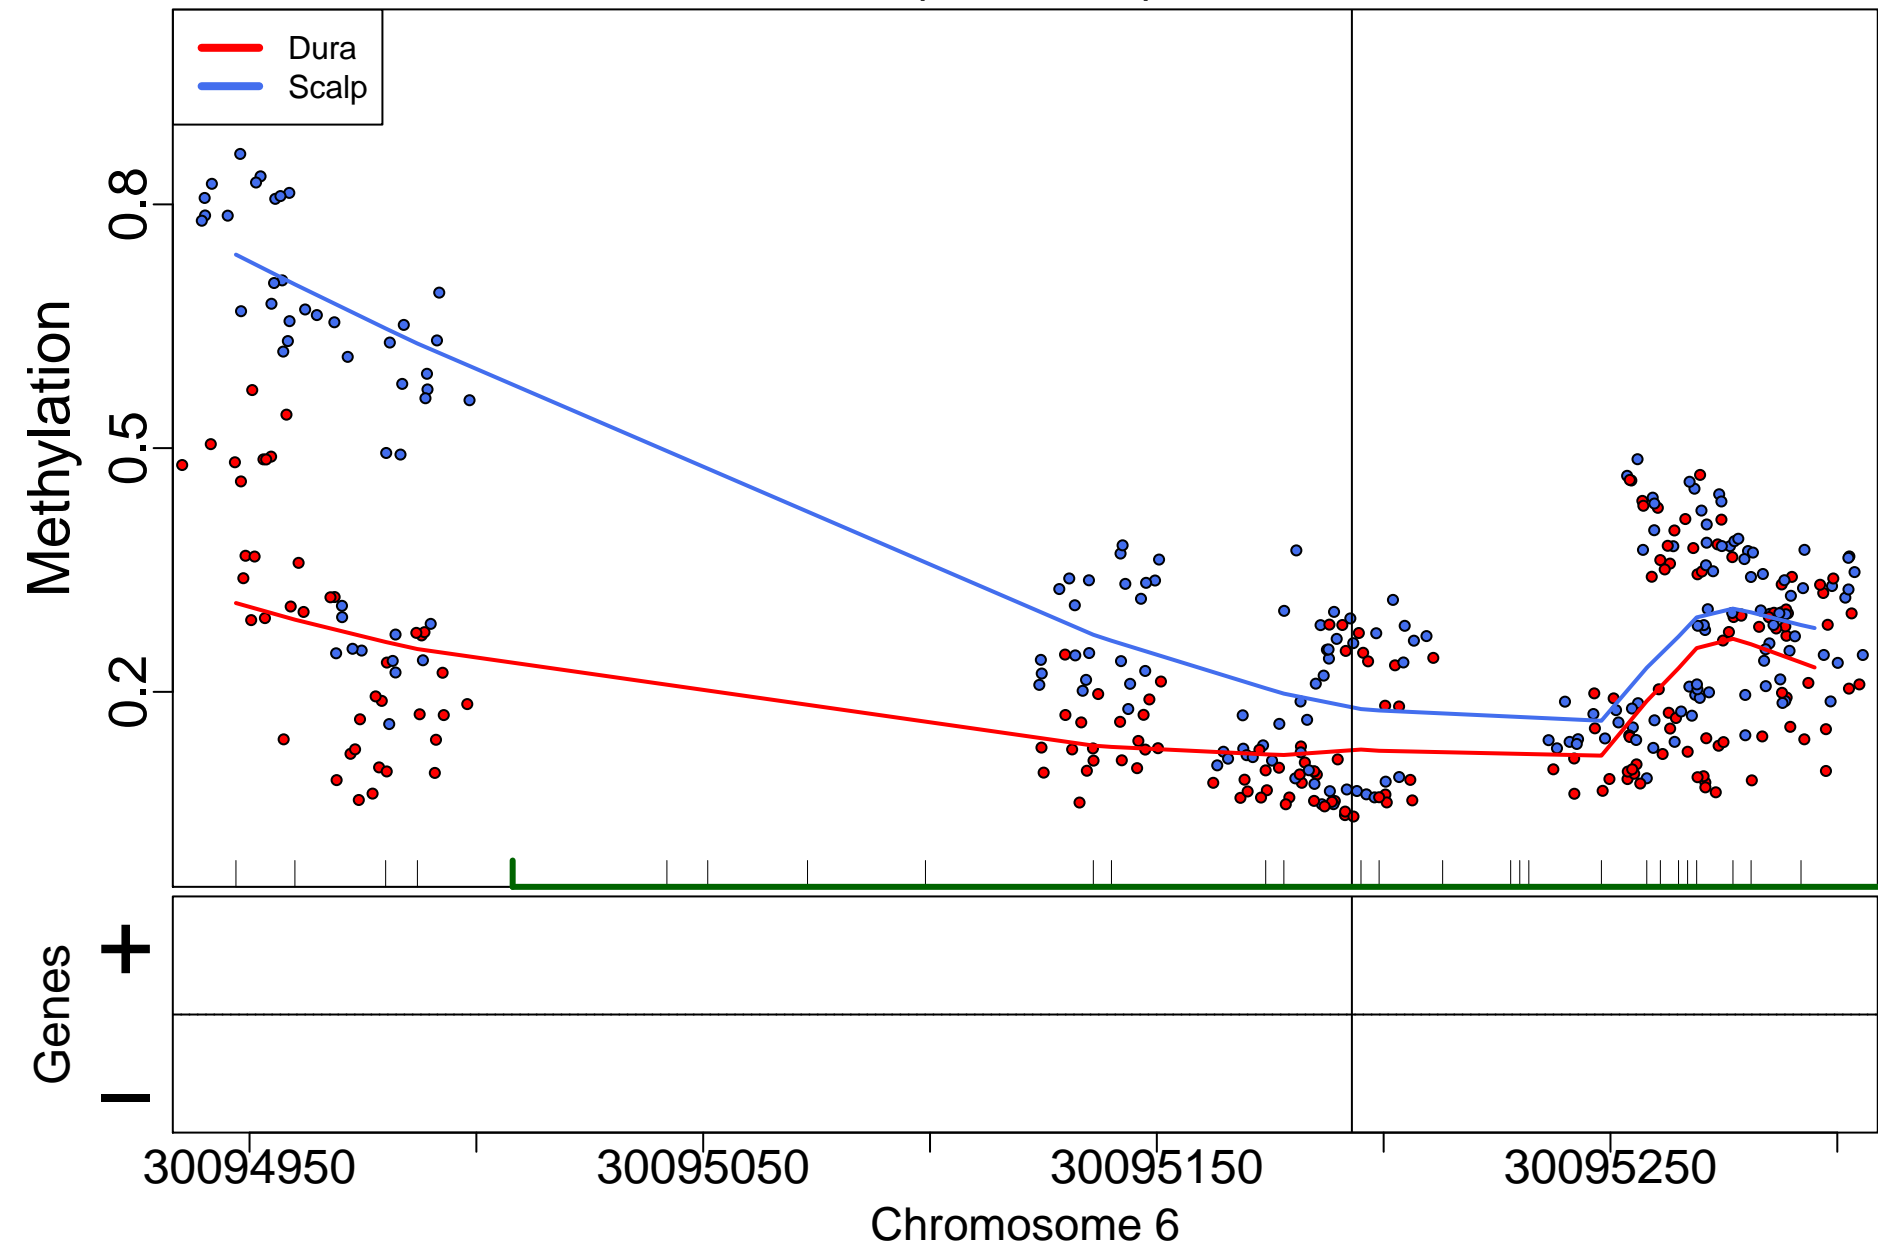

BARHL2; 2955bp from tss:upstream

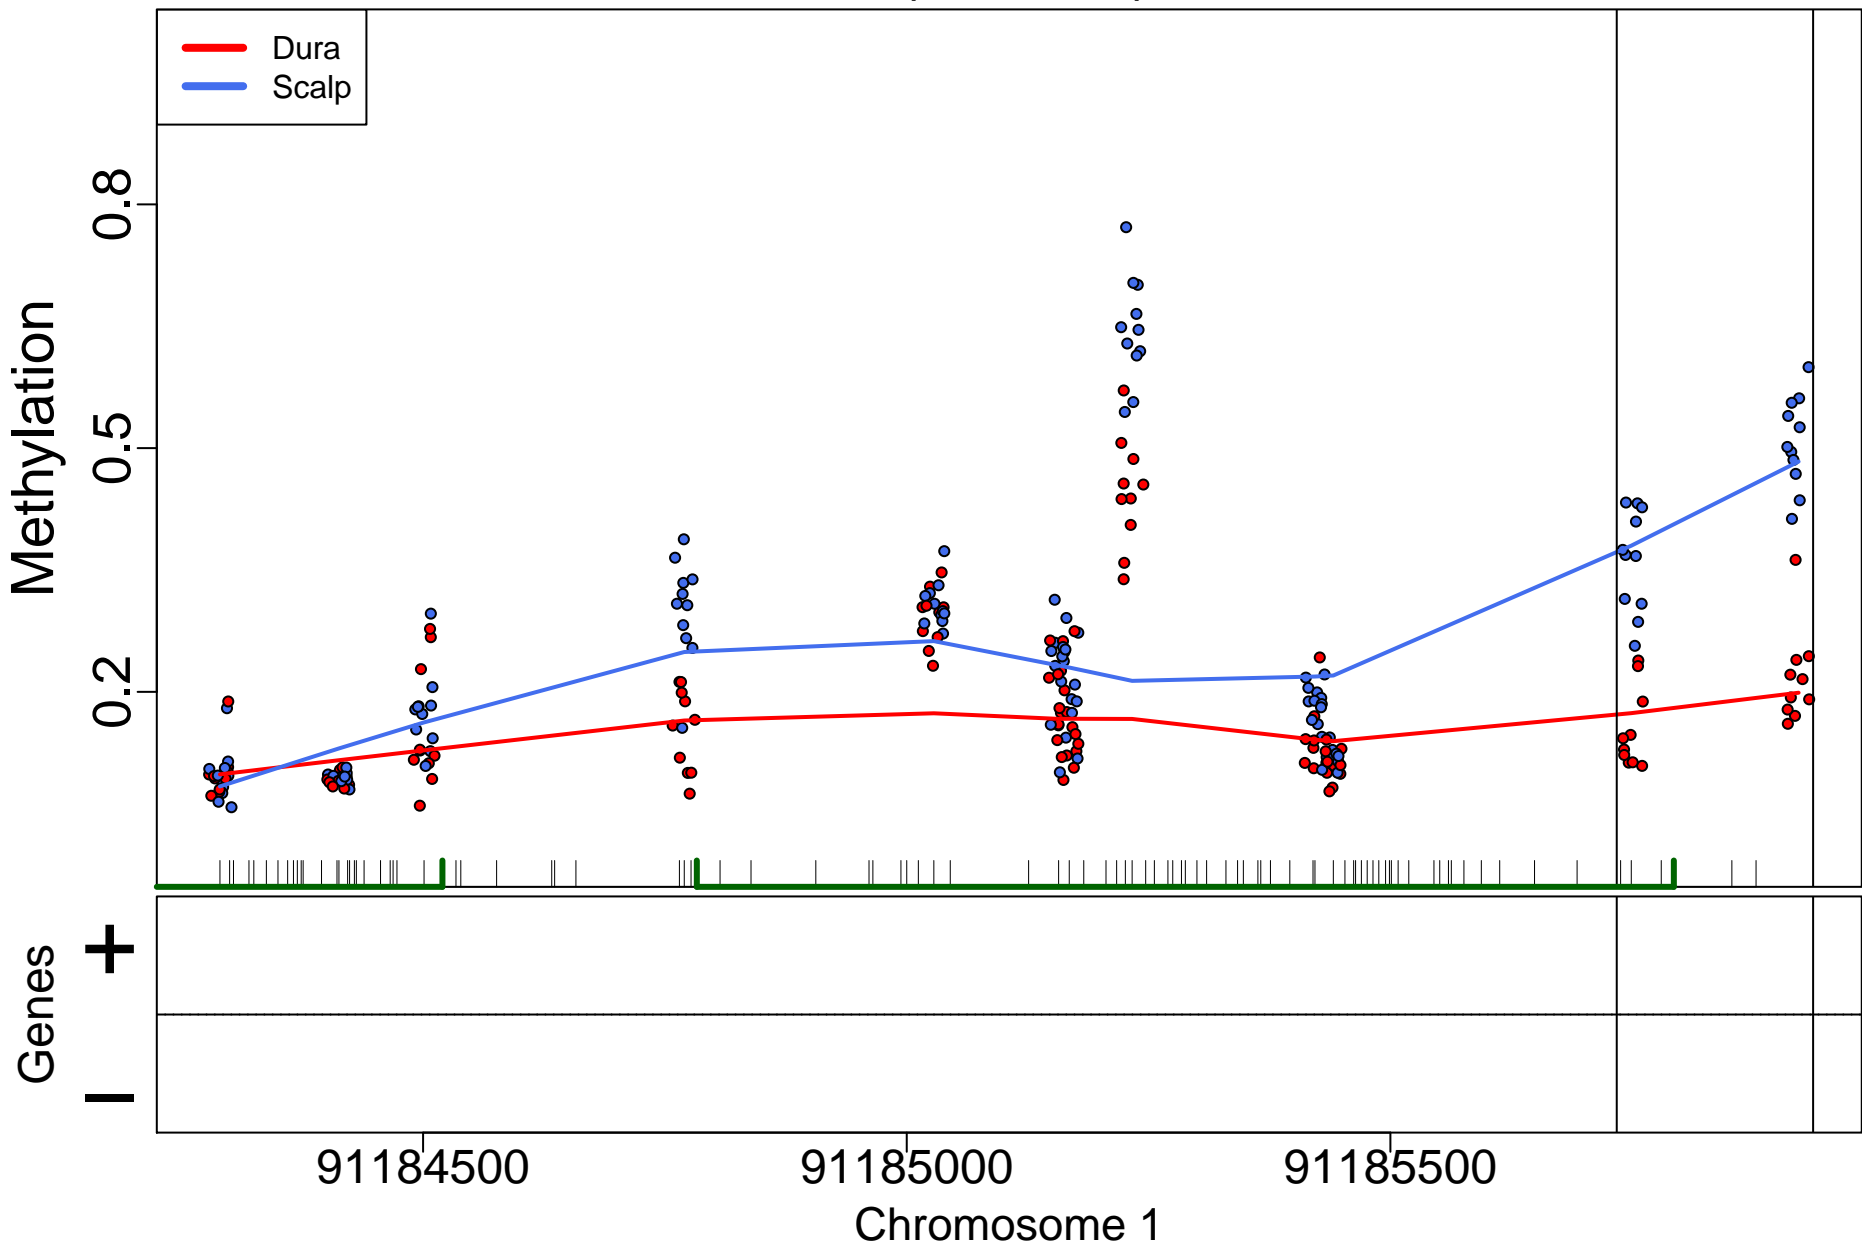

AQPEP; 0bp from tss:NA

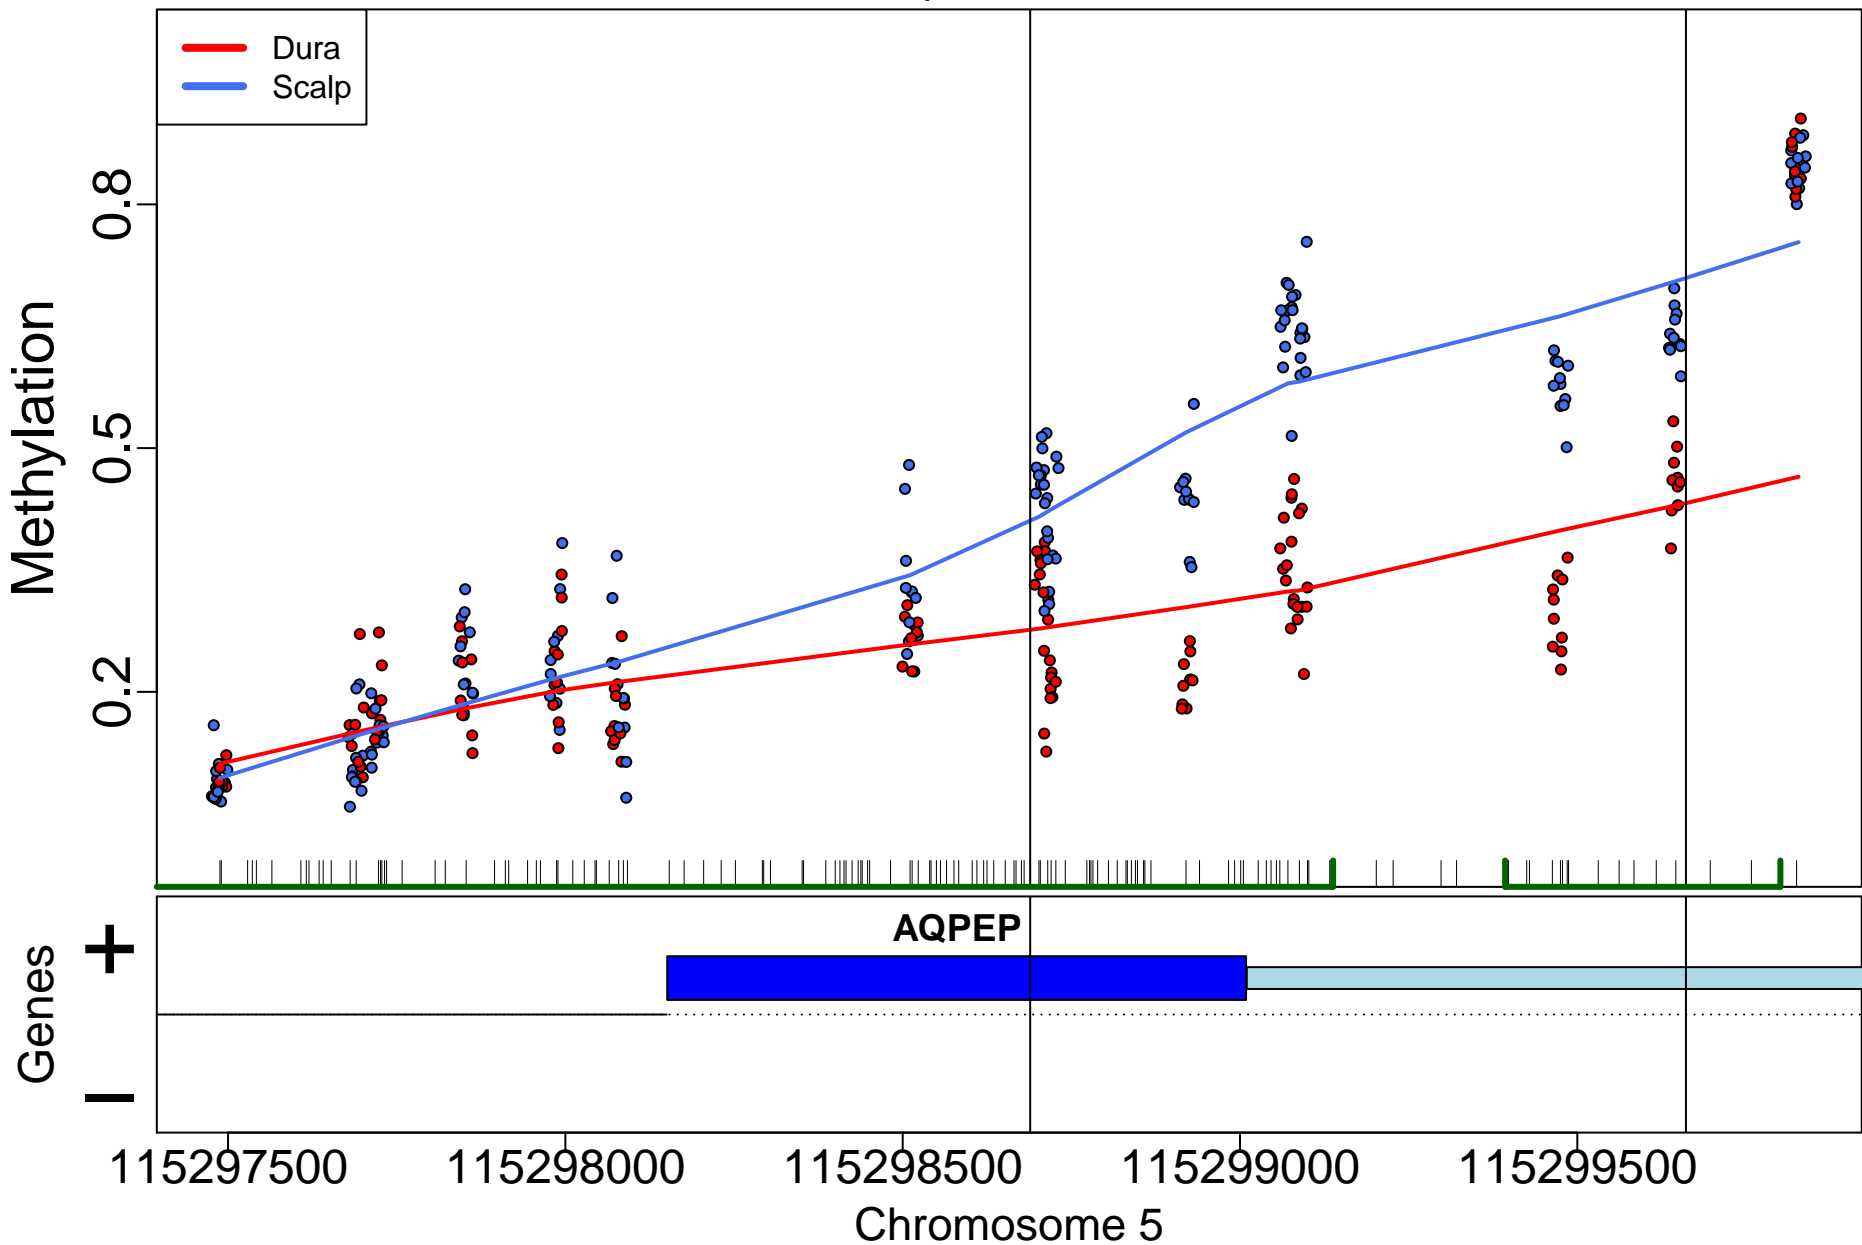

KIAA0930; 39631bp from tss:inside intron

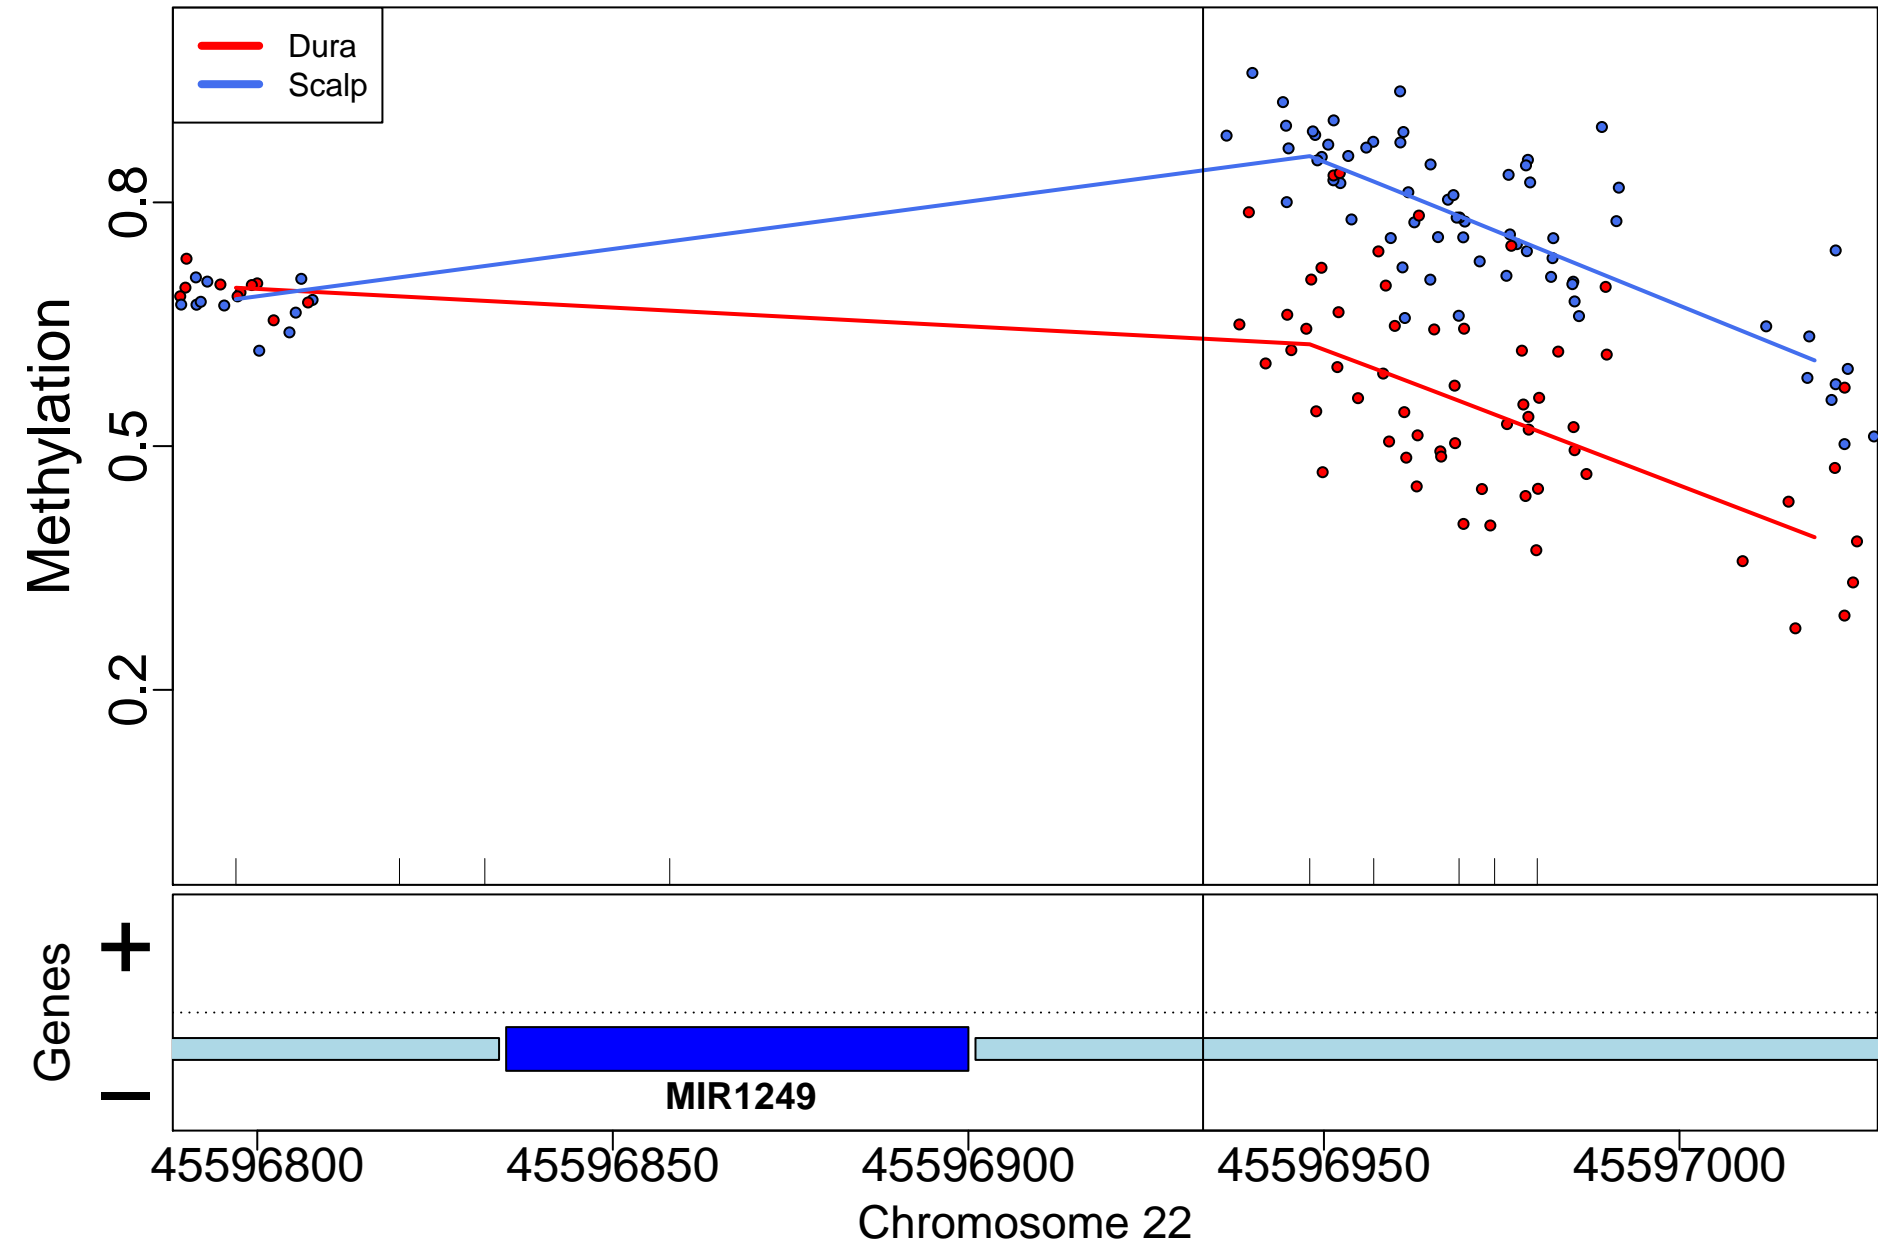

# KIFC3; 0bp from tss:NA

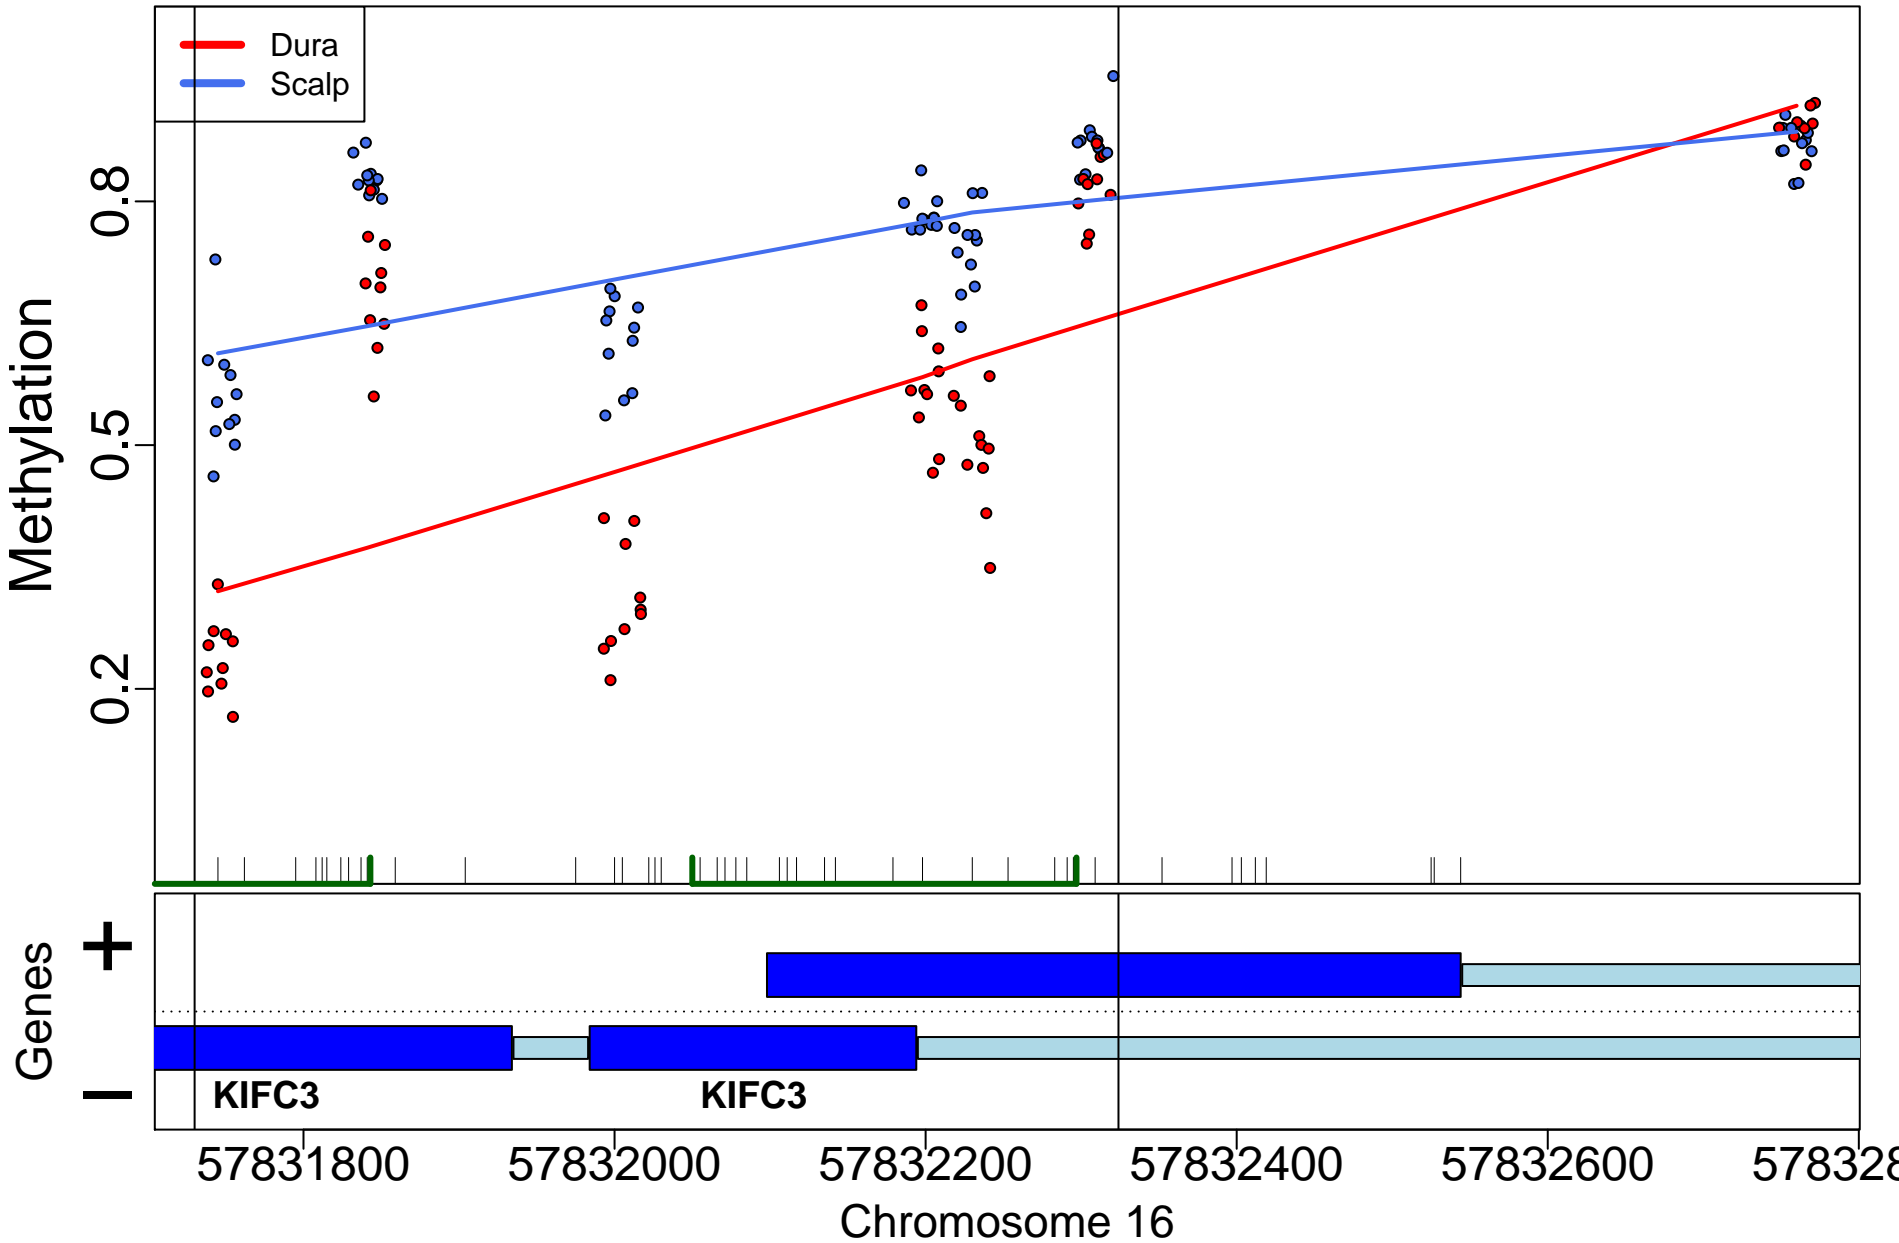

LBX1-AS1; 8431bp from tss:inside exon

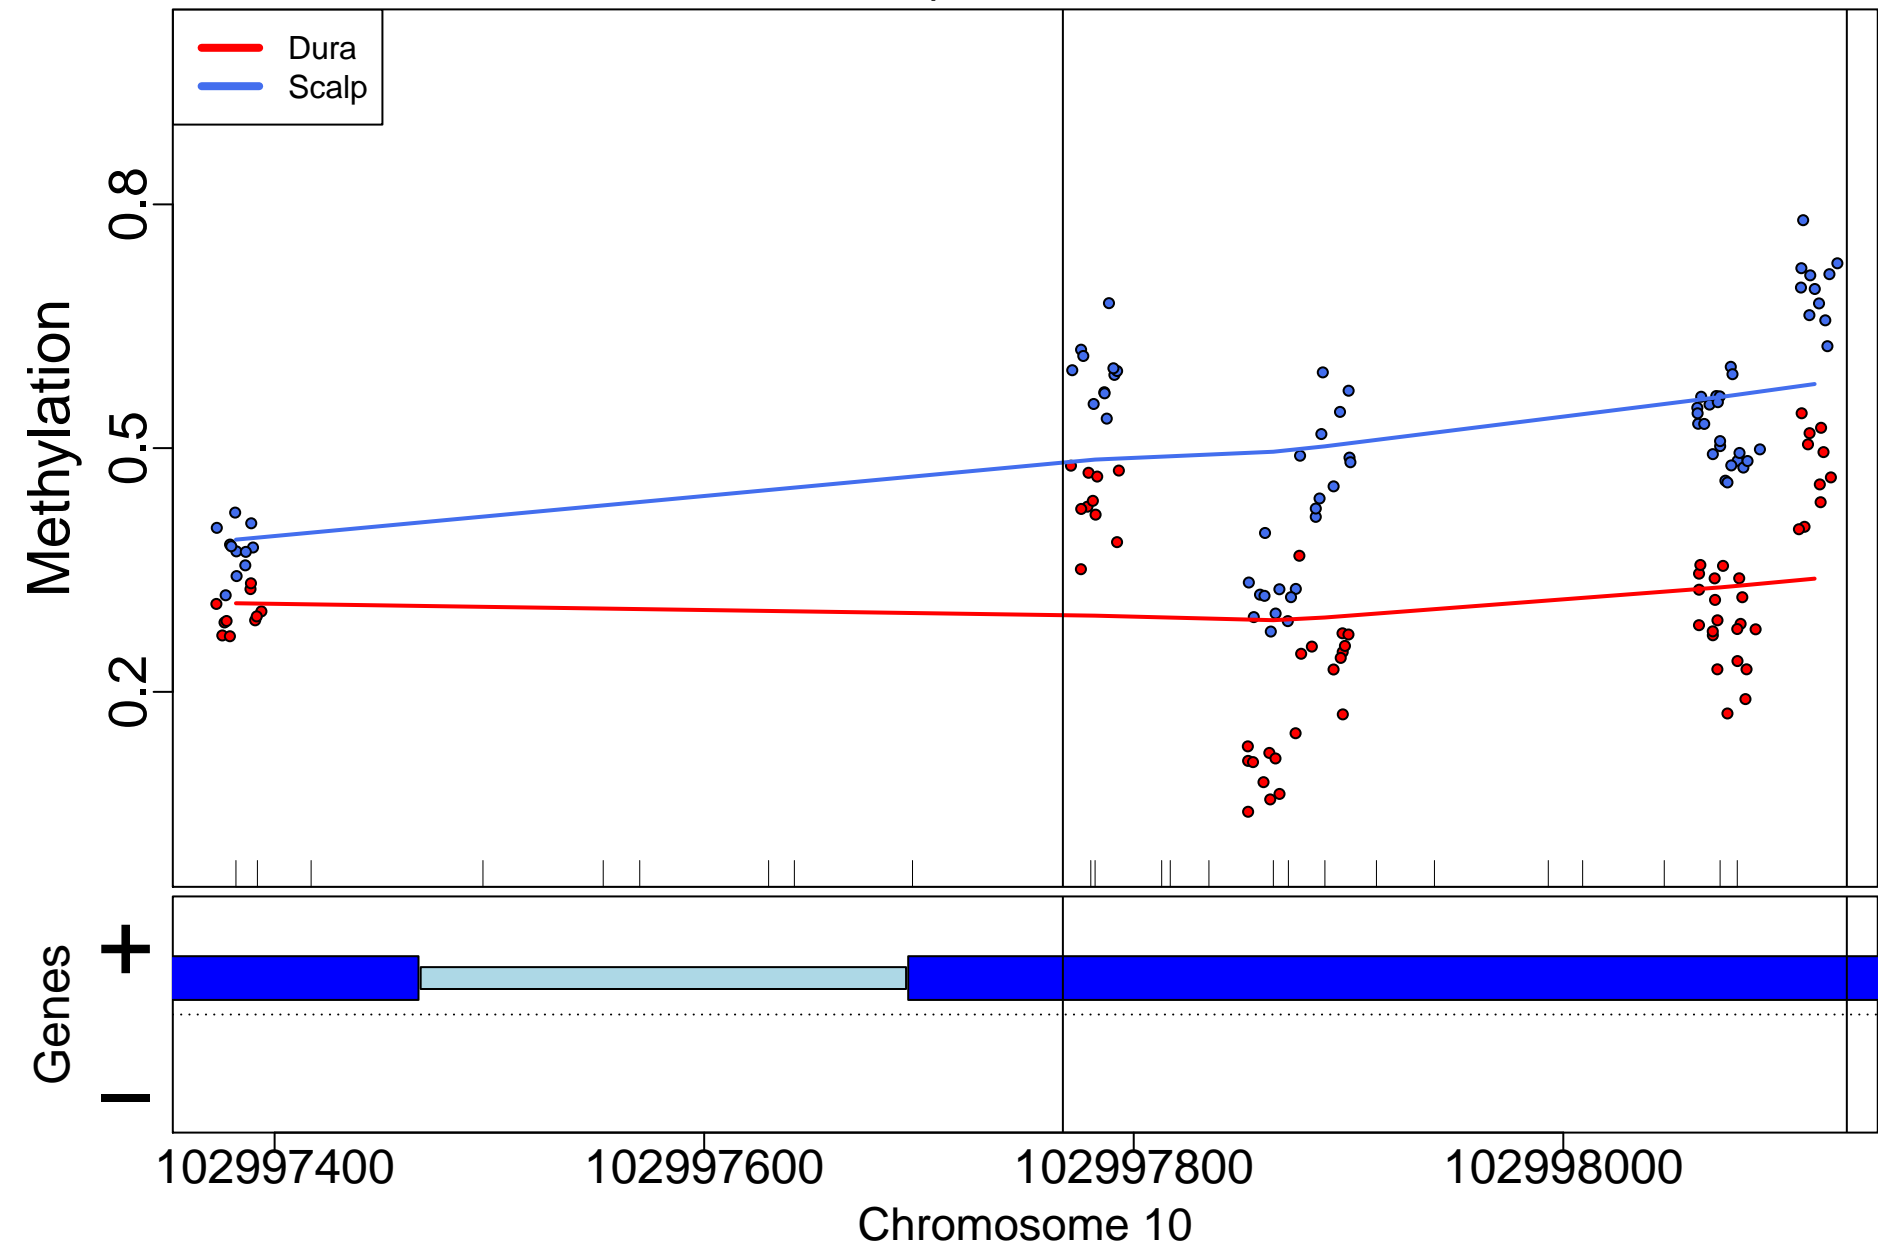

# ZSCAN9; 572bp from tss:promoter

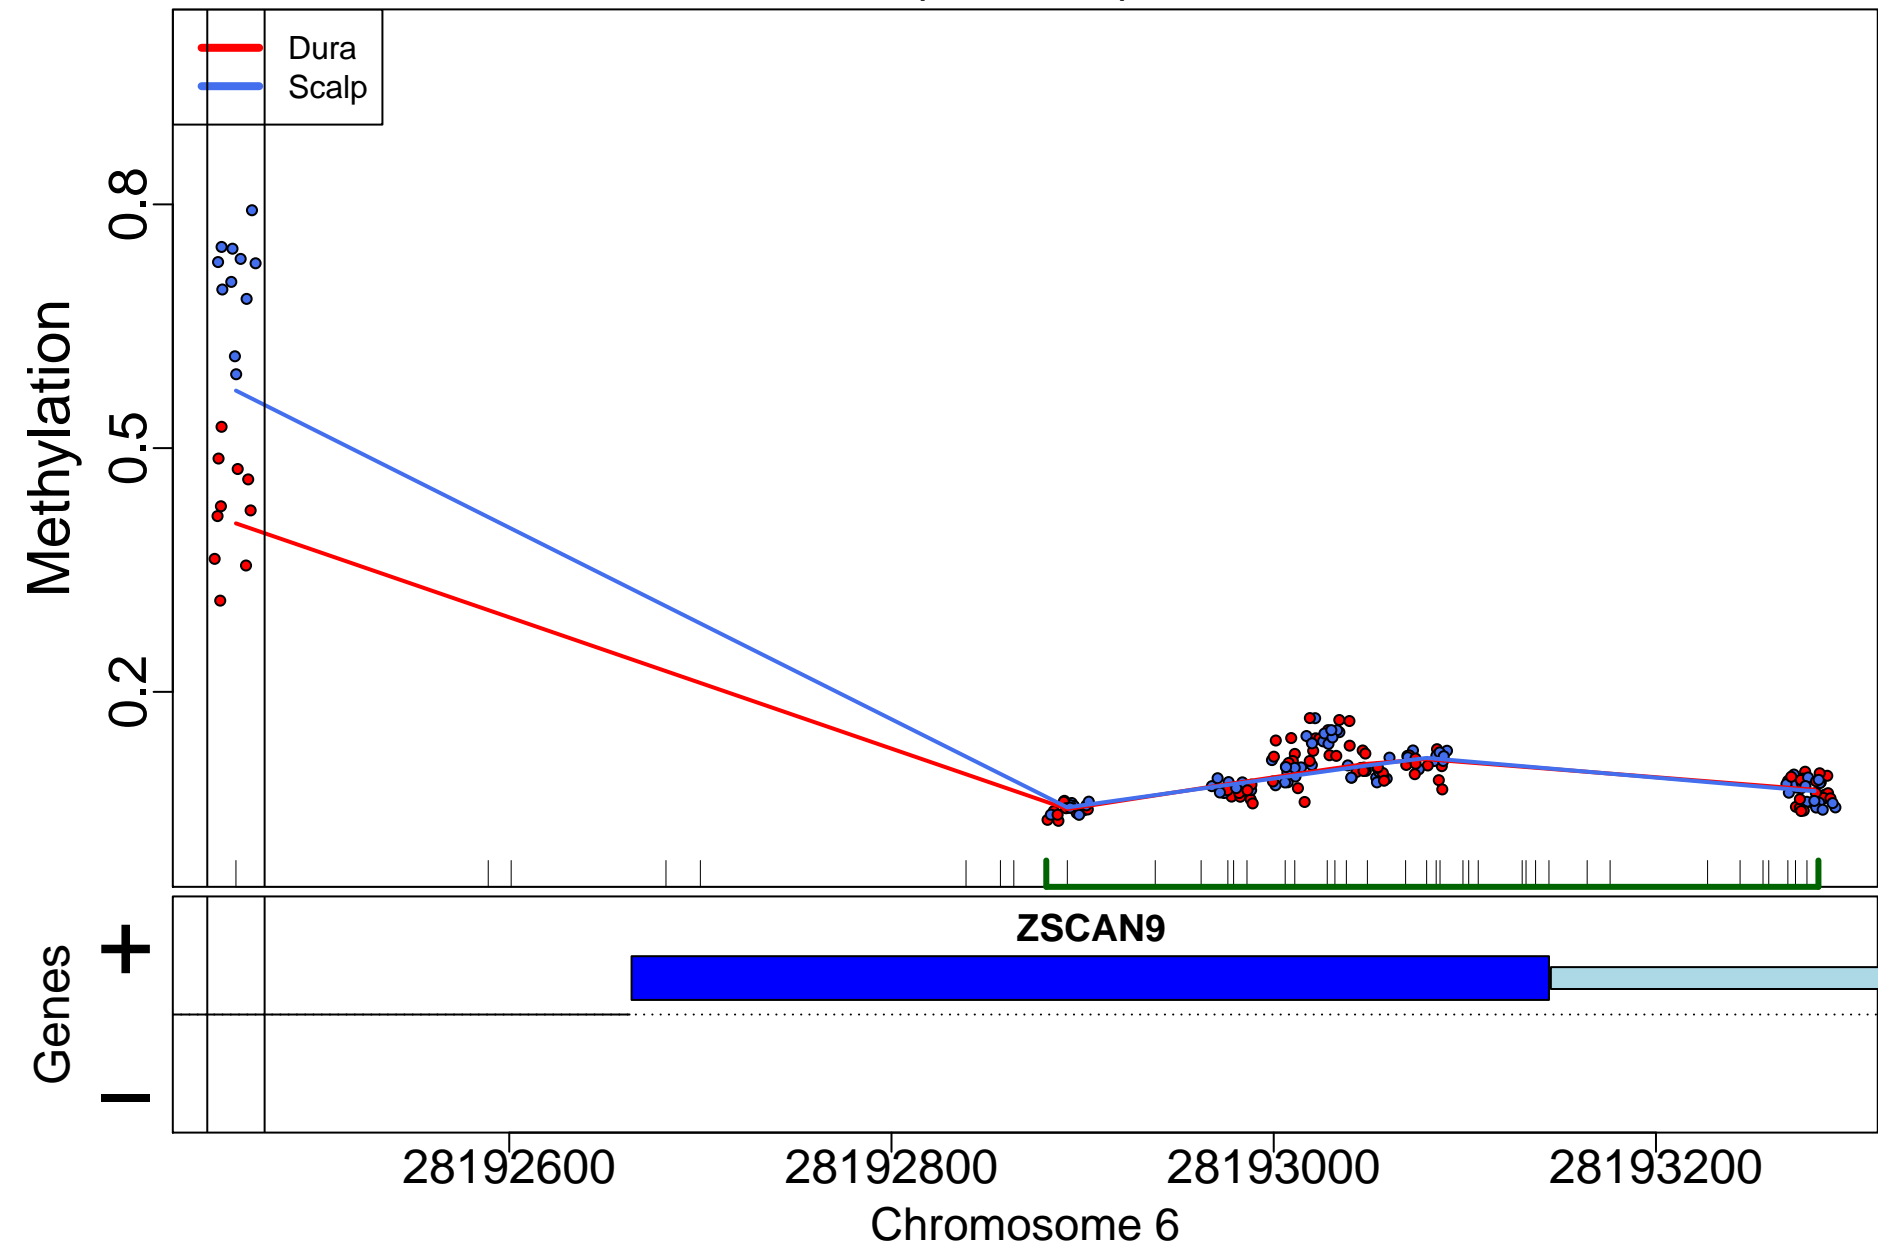



LRRTM2; 0bp from tss:overlaps 5'

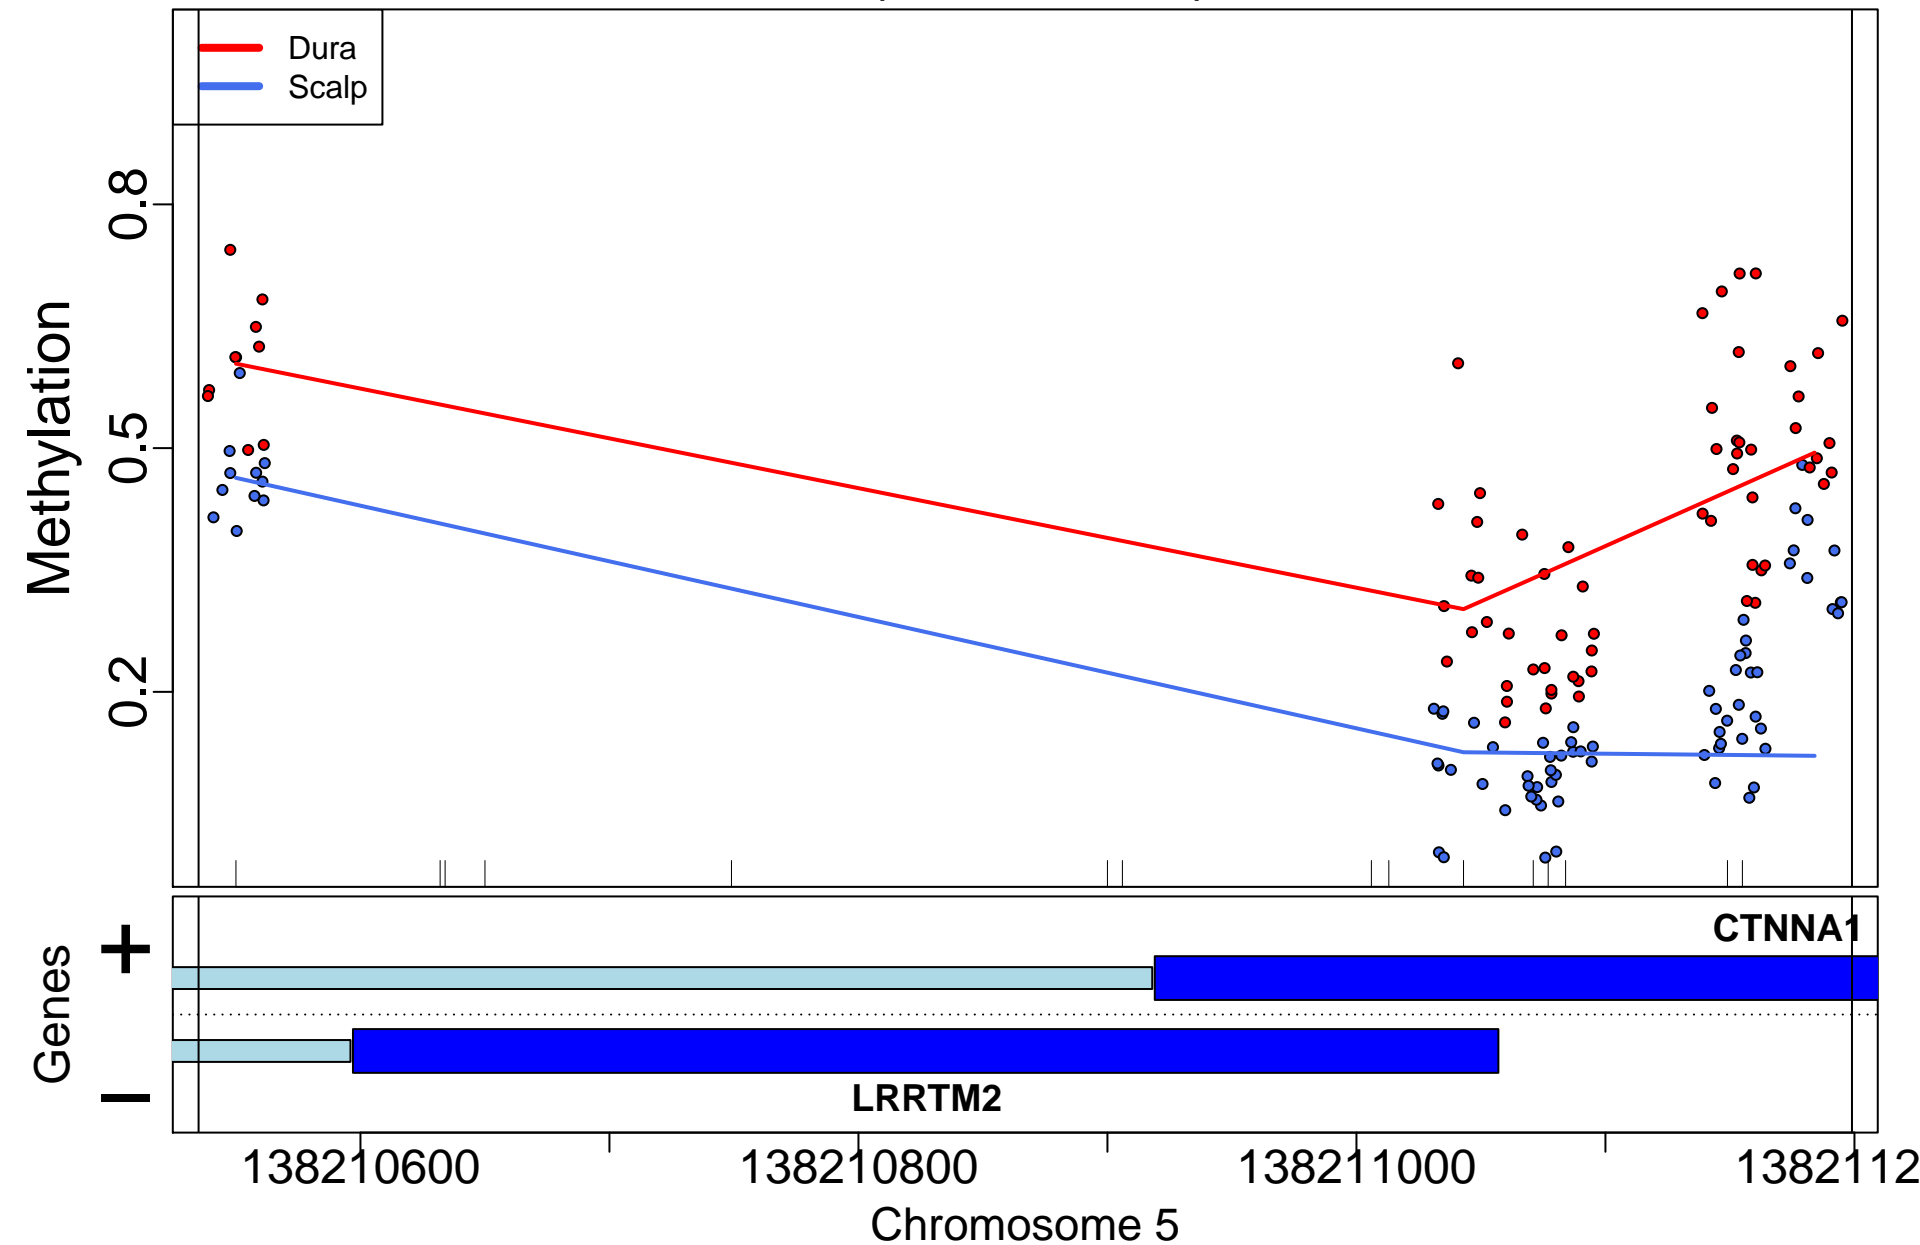

AP2A2; 4888bp from tss:overlaps exon upstream

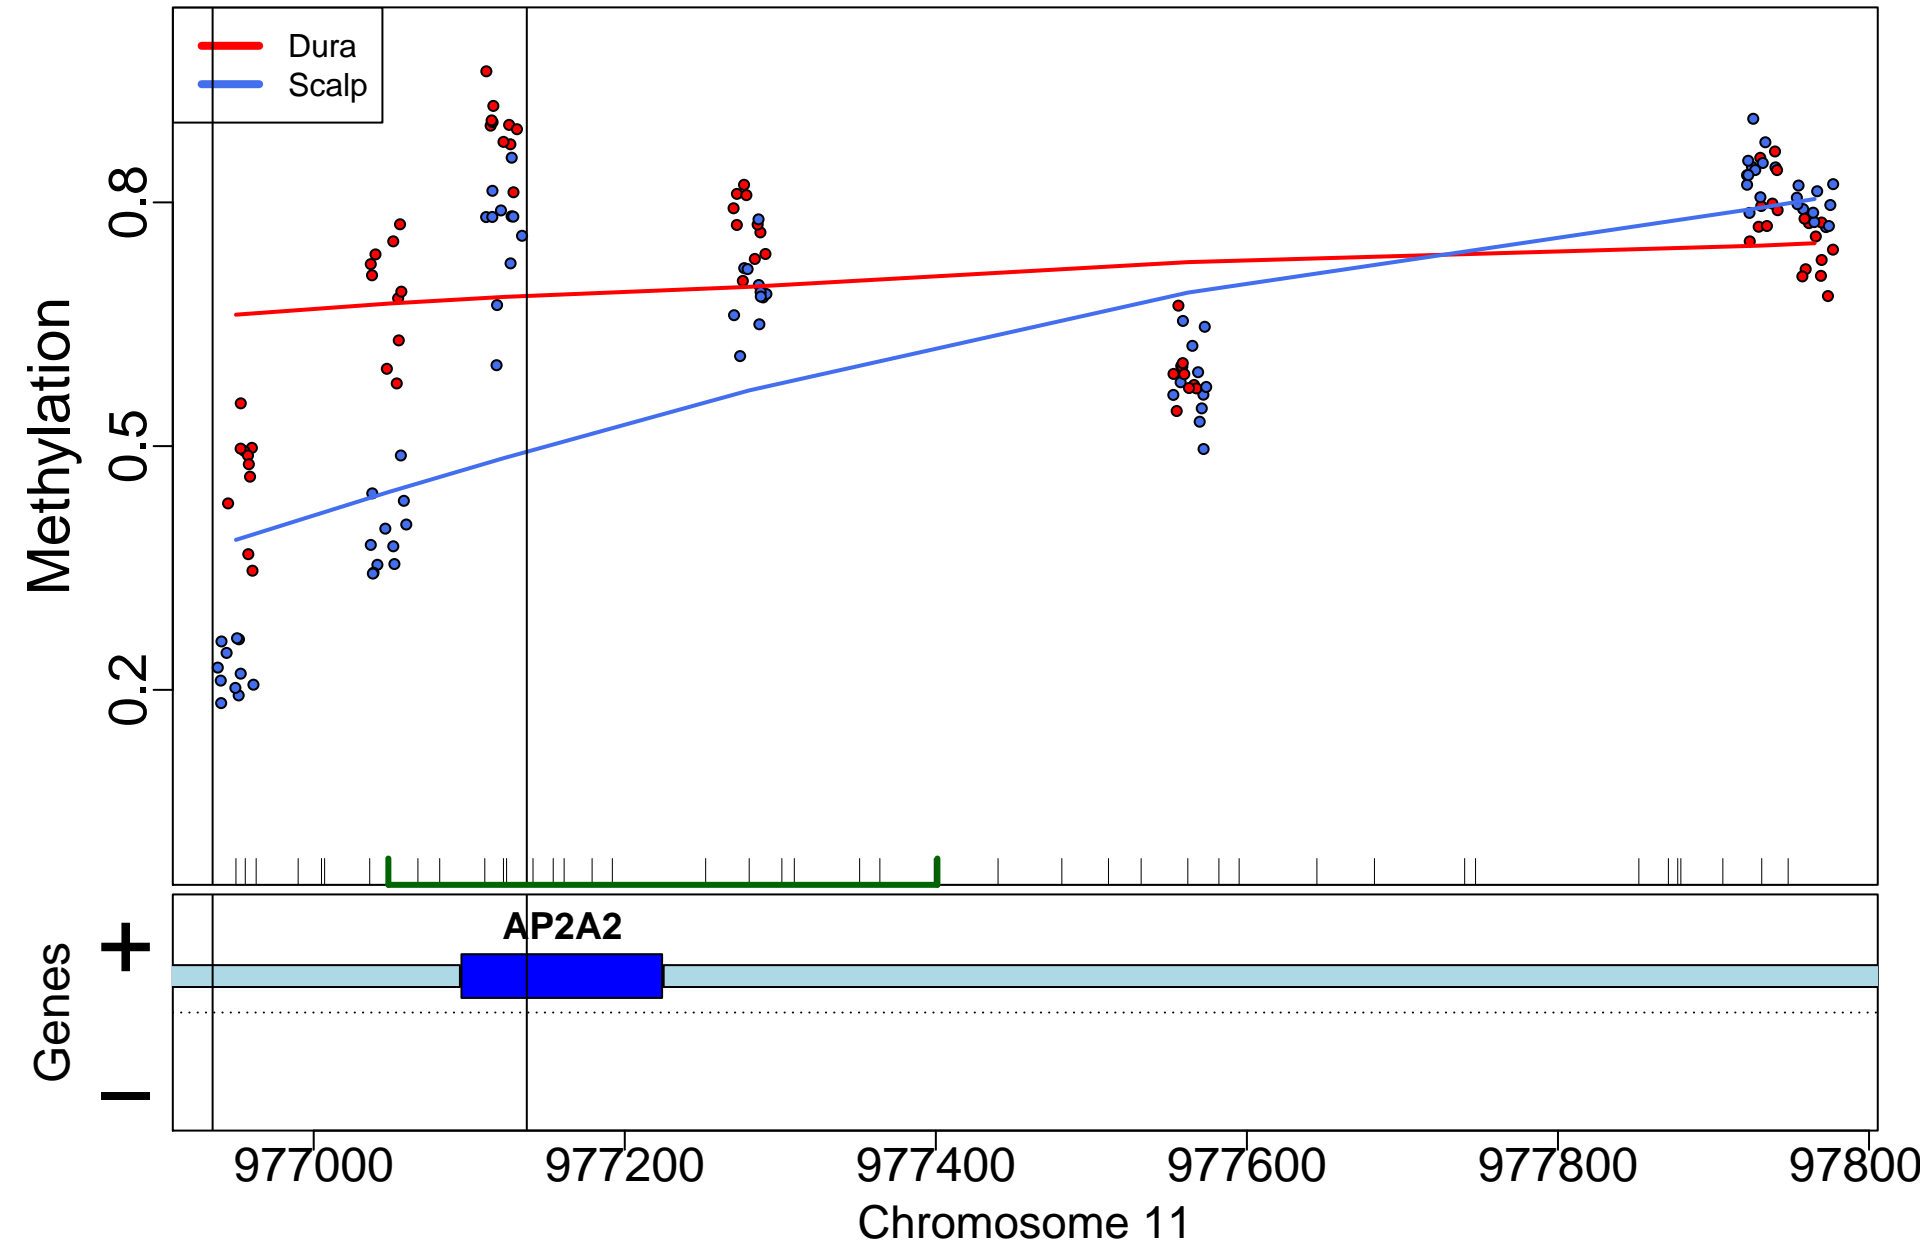

# WBP1L; 0bp from tss:NA

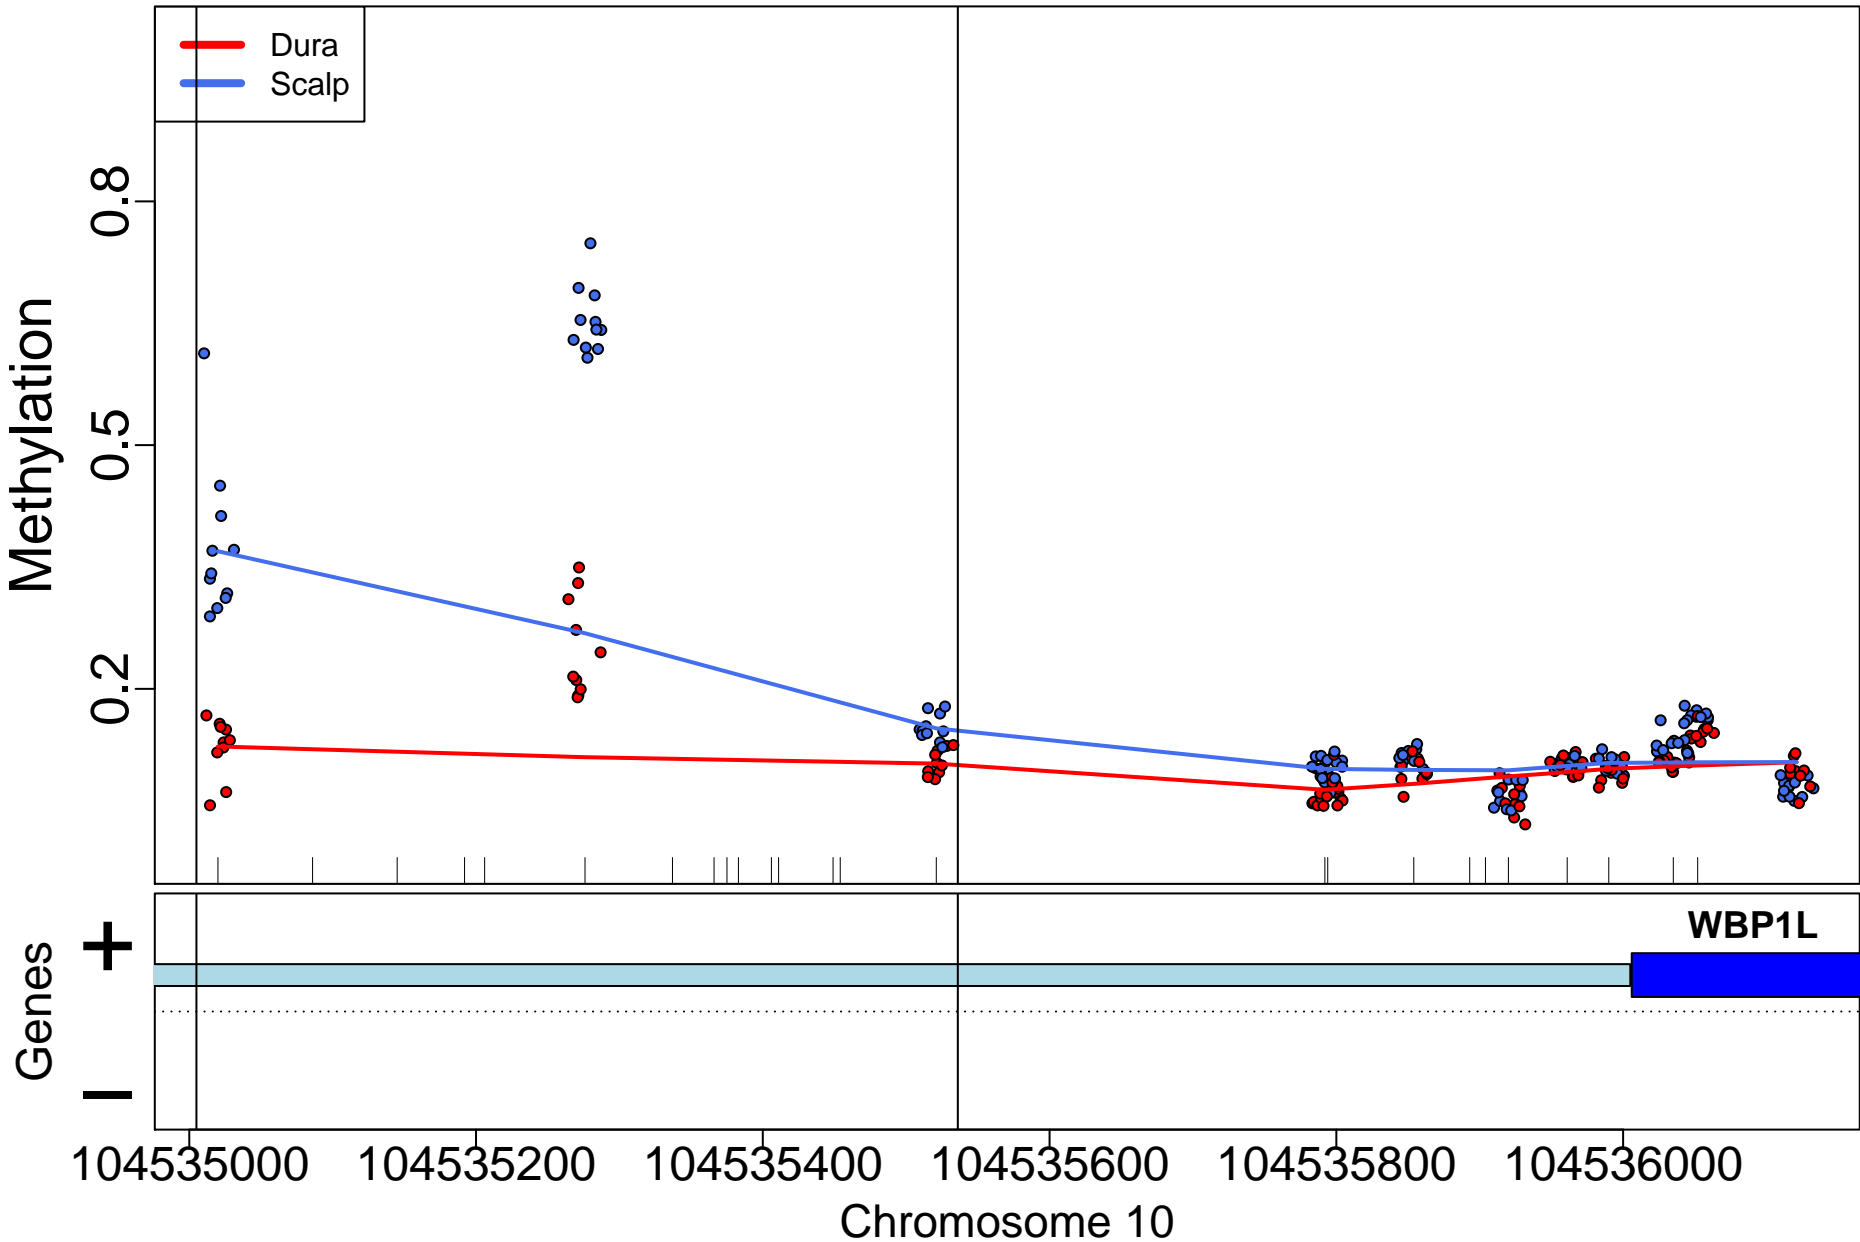

SLC22A18AS; 0bp from tss:NA

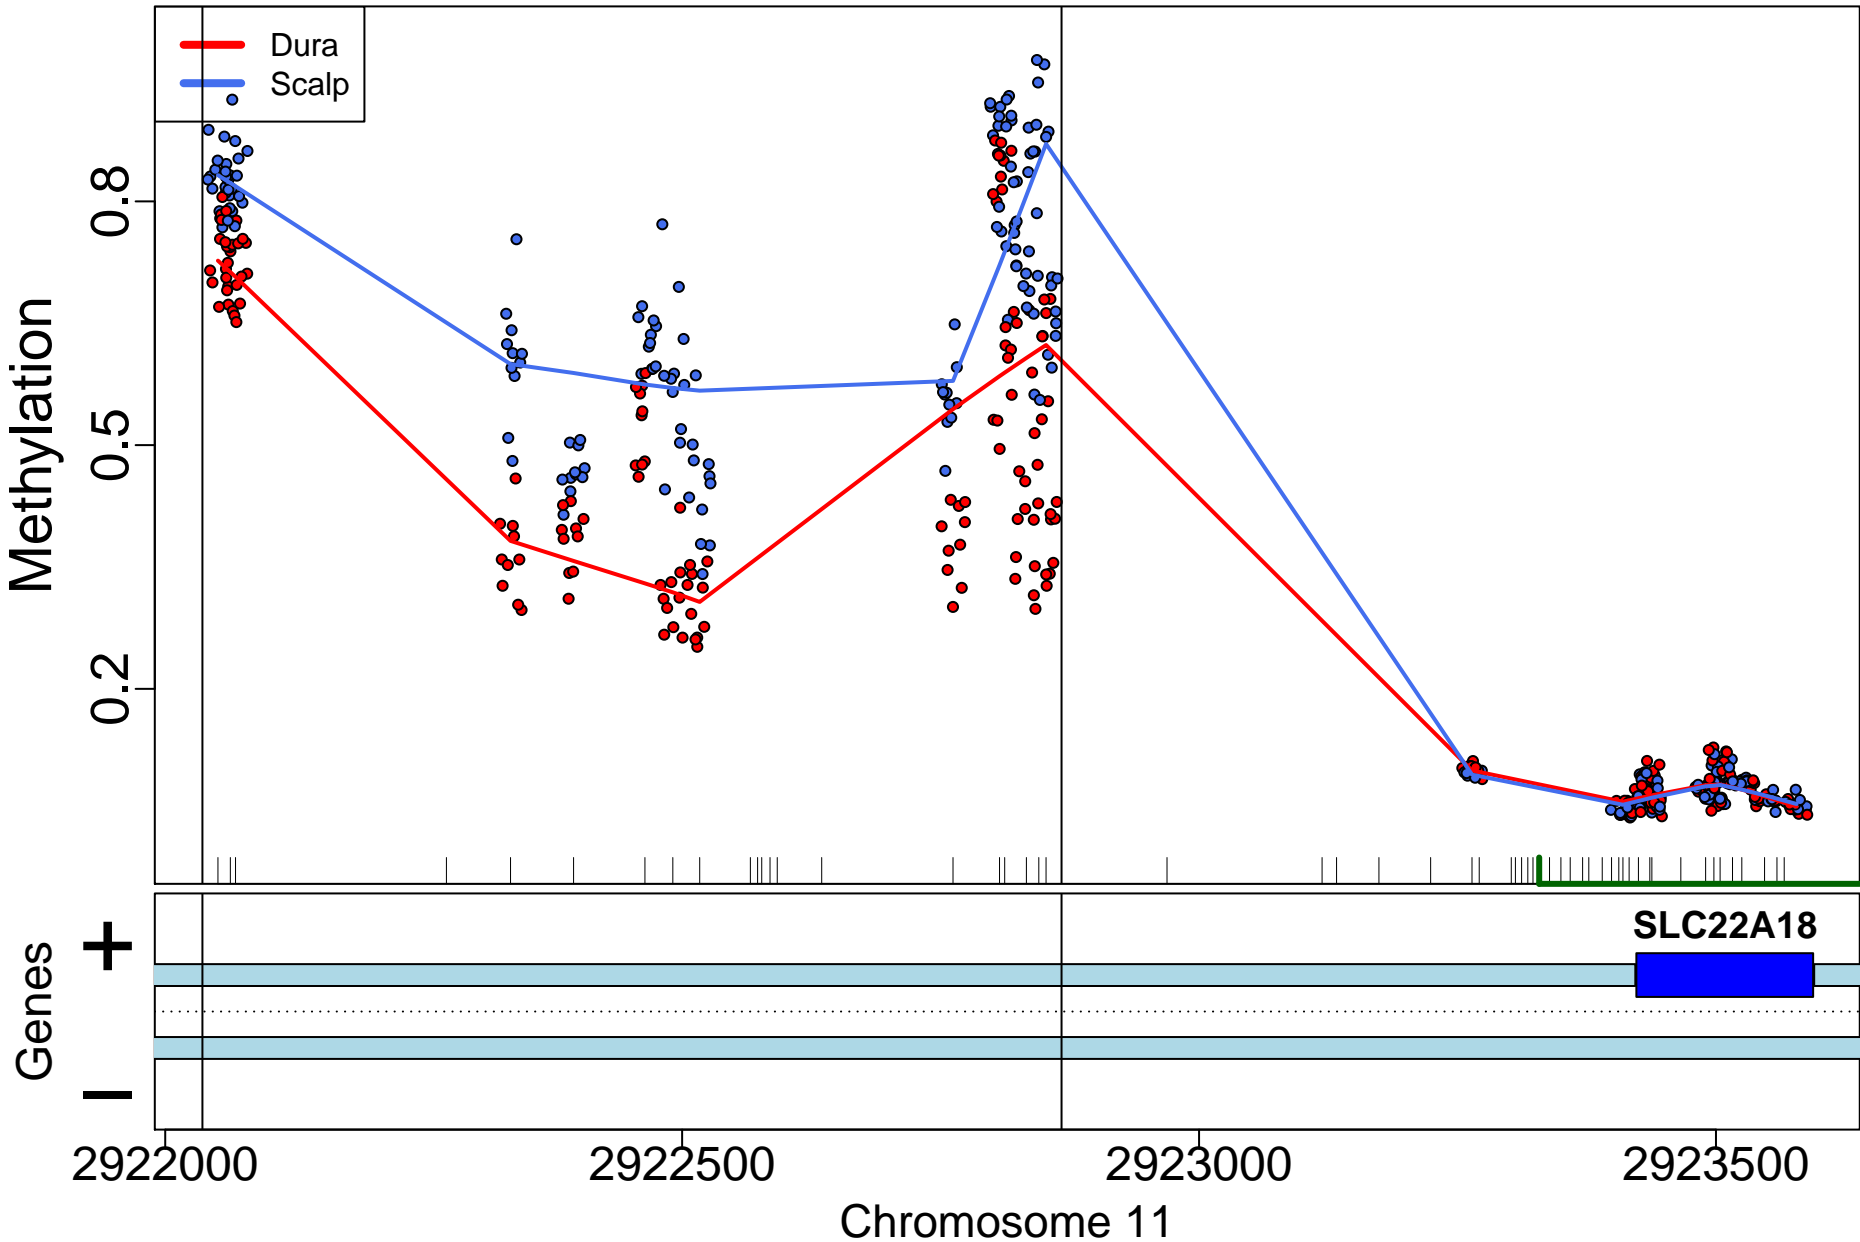

ECE2; 25635bp from tss:inside intron

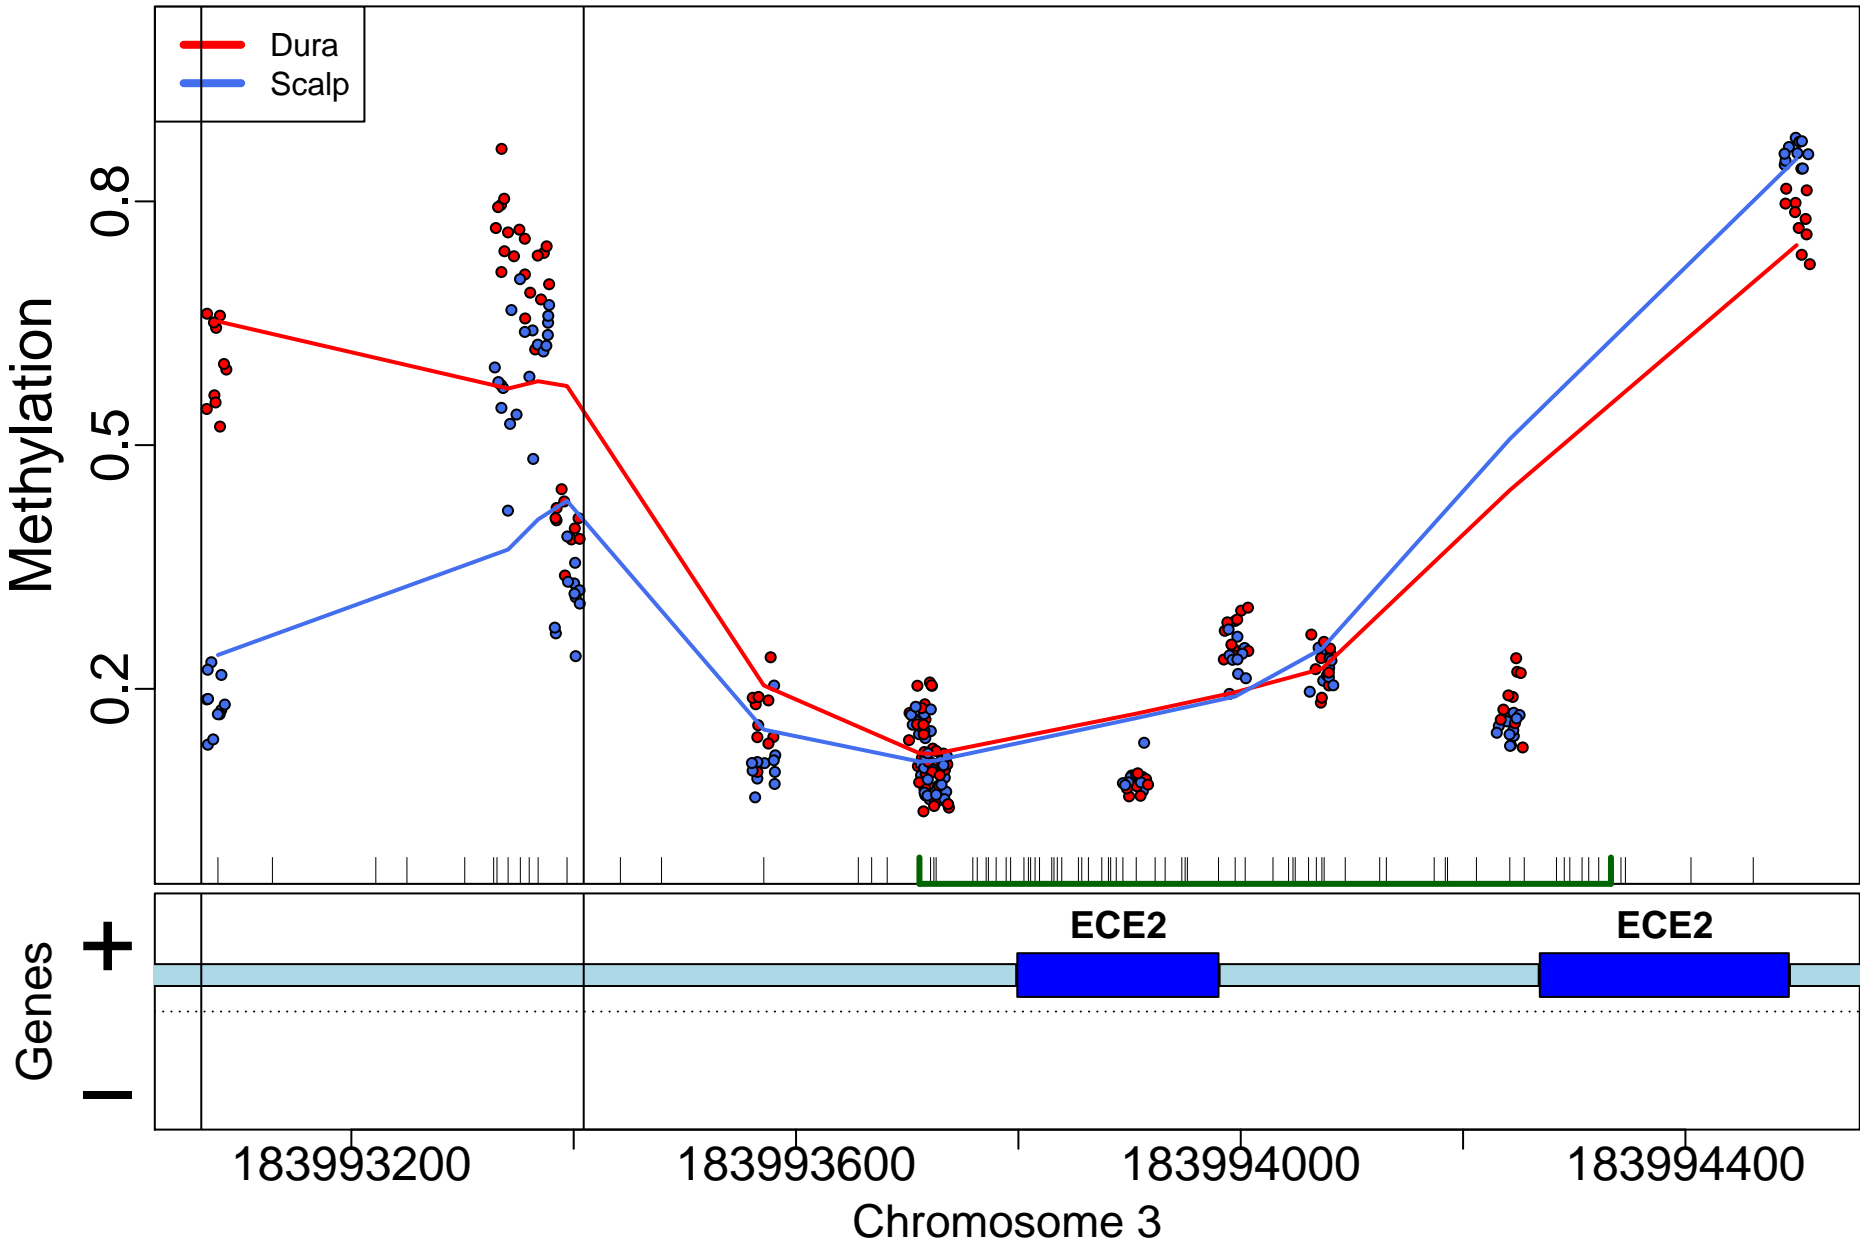

SLC22A18AS; 16704bp from tss:downstream

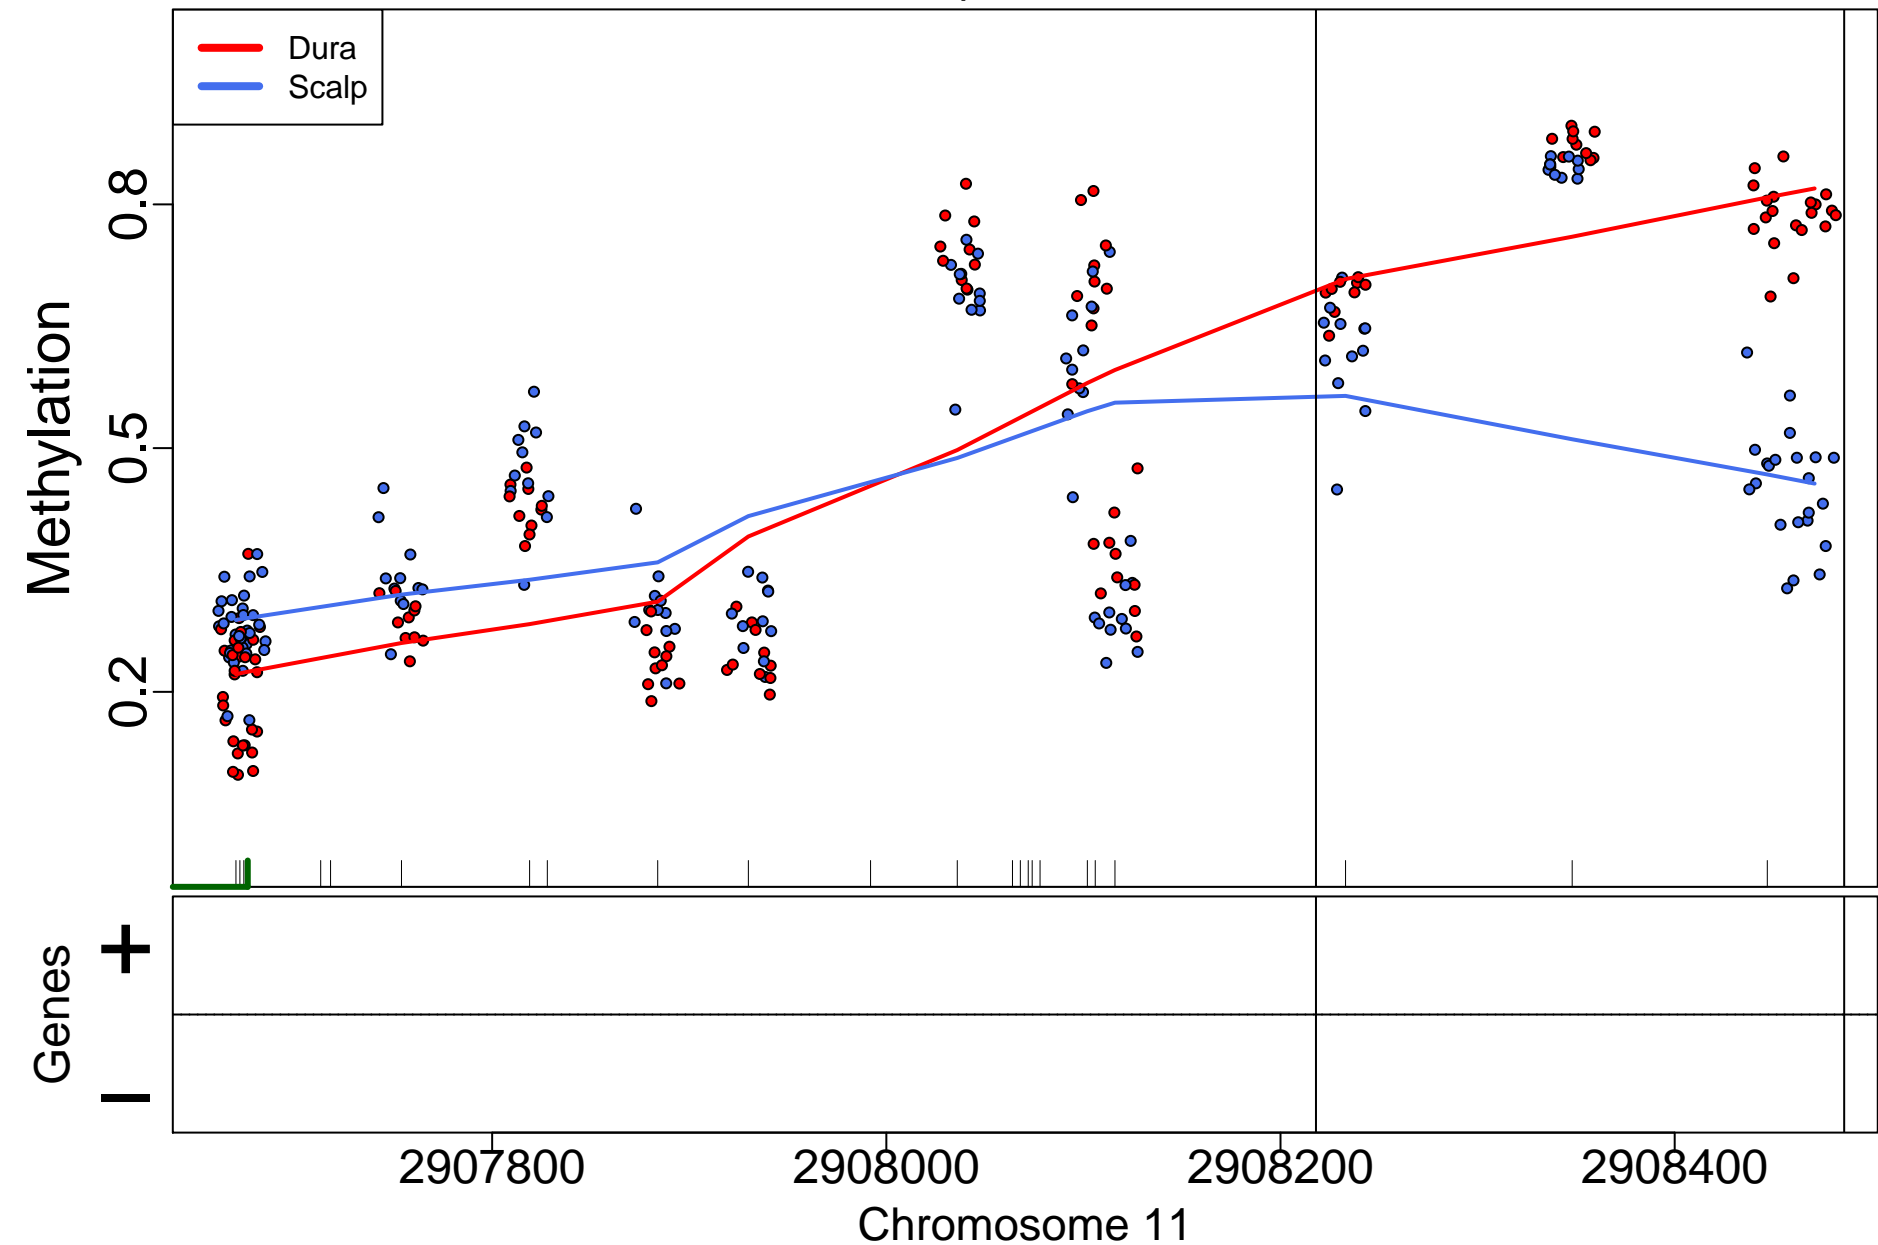

LOX; 968bp from tss:promoter

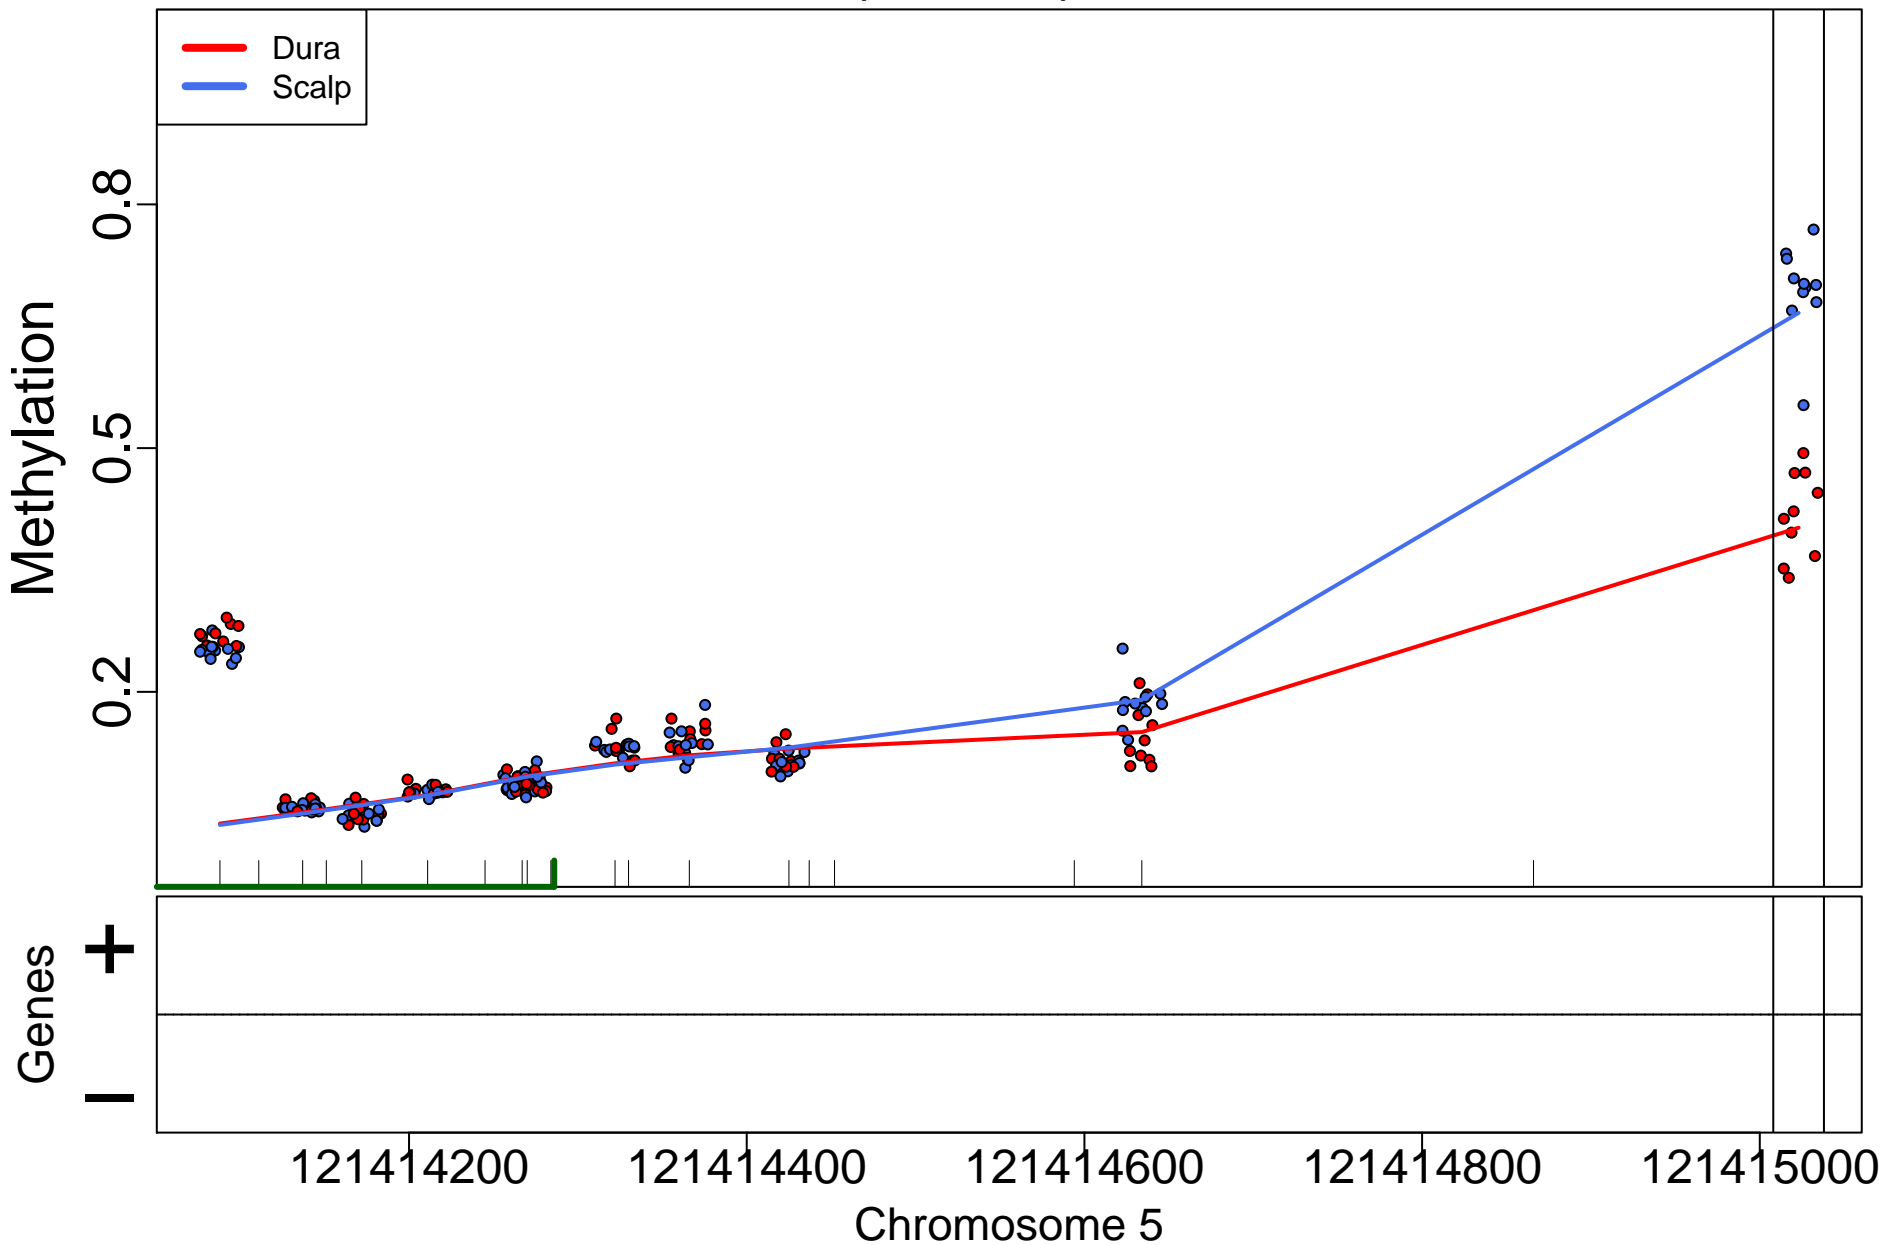

ALX3; 12744bp from tss:upstream

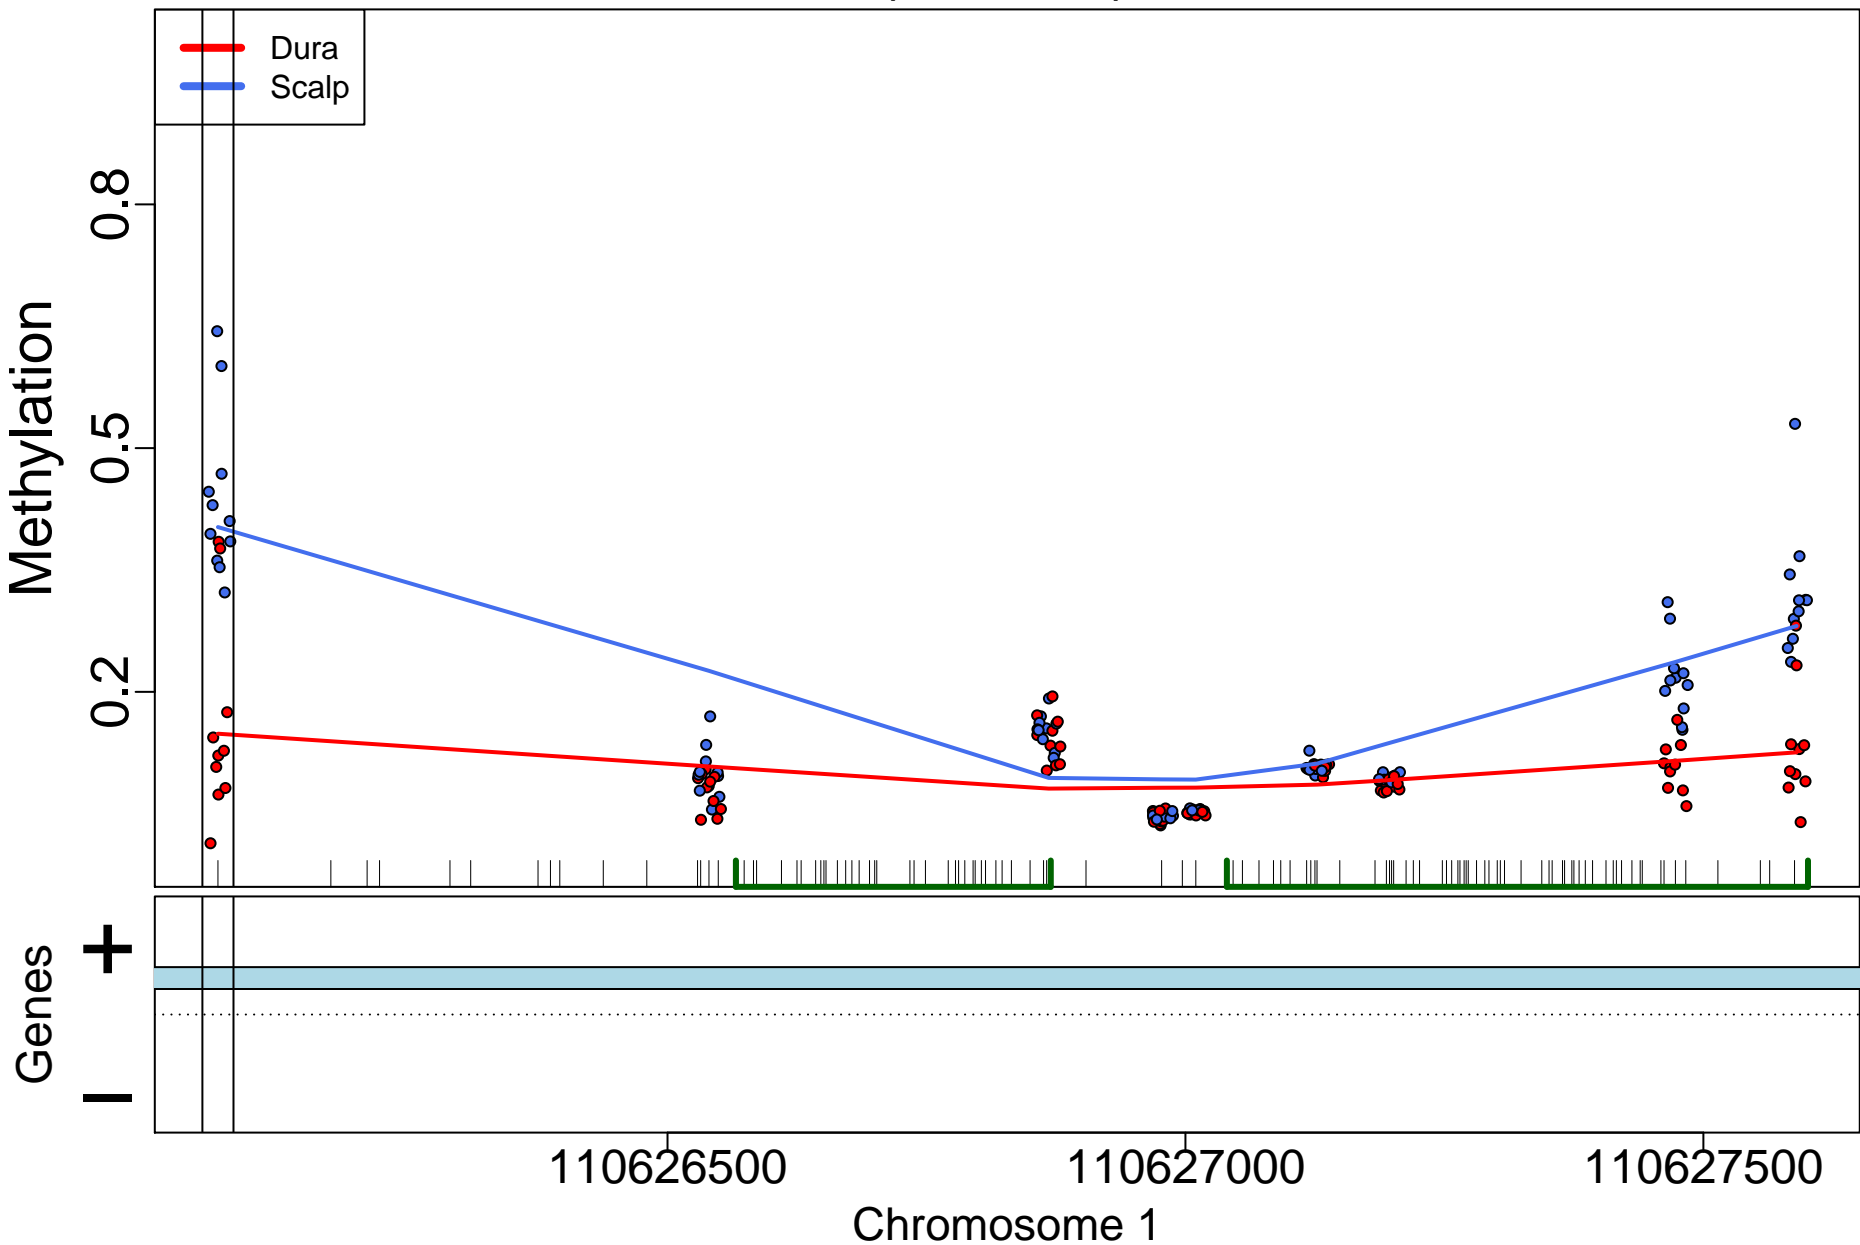



# FOXF1; 2495bp from tss:inside exon

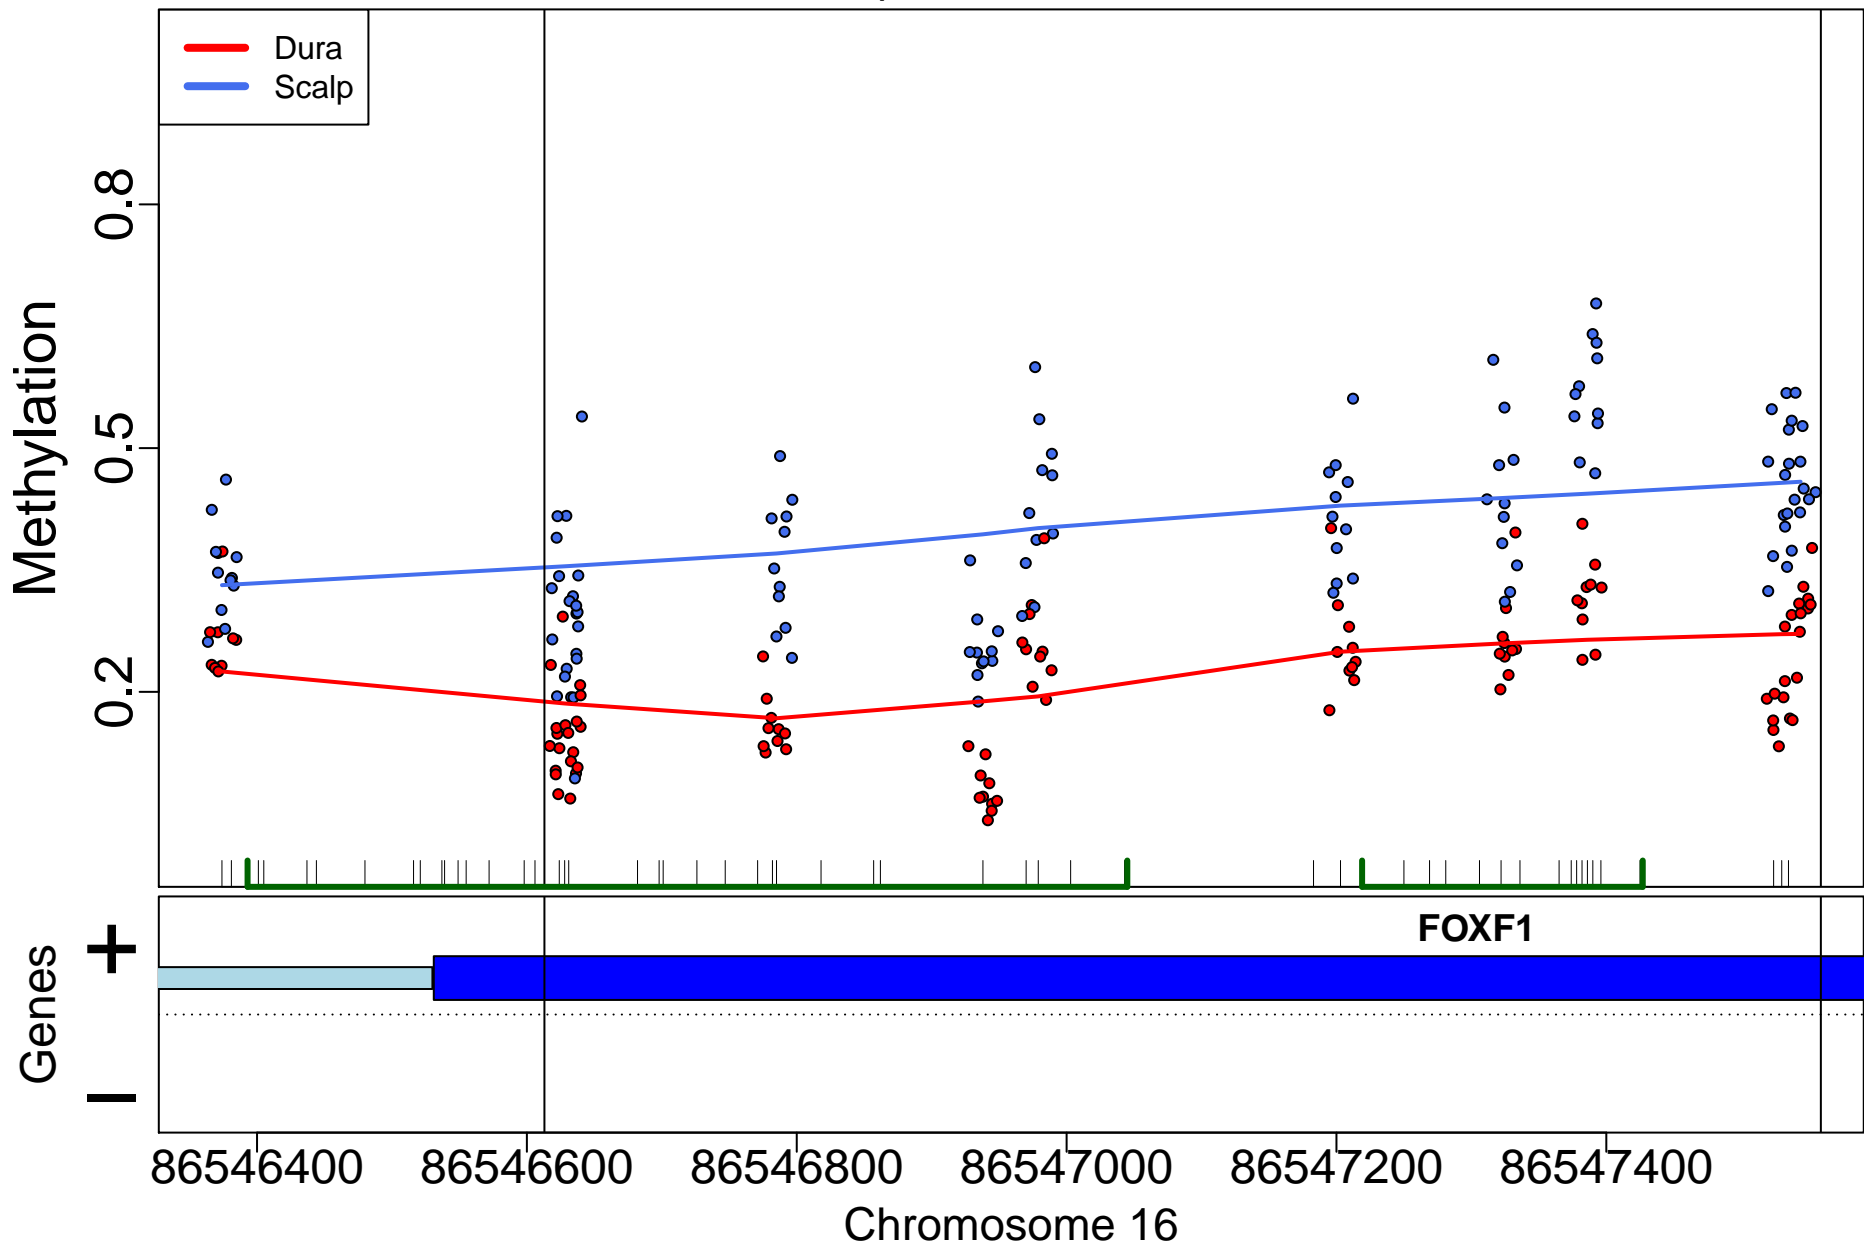

# HOTAIRM1; 0bp from tss:NA

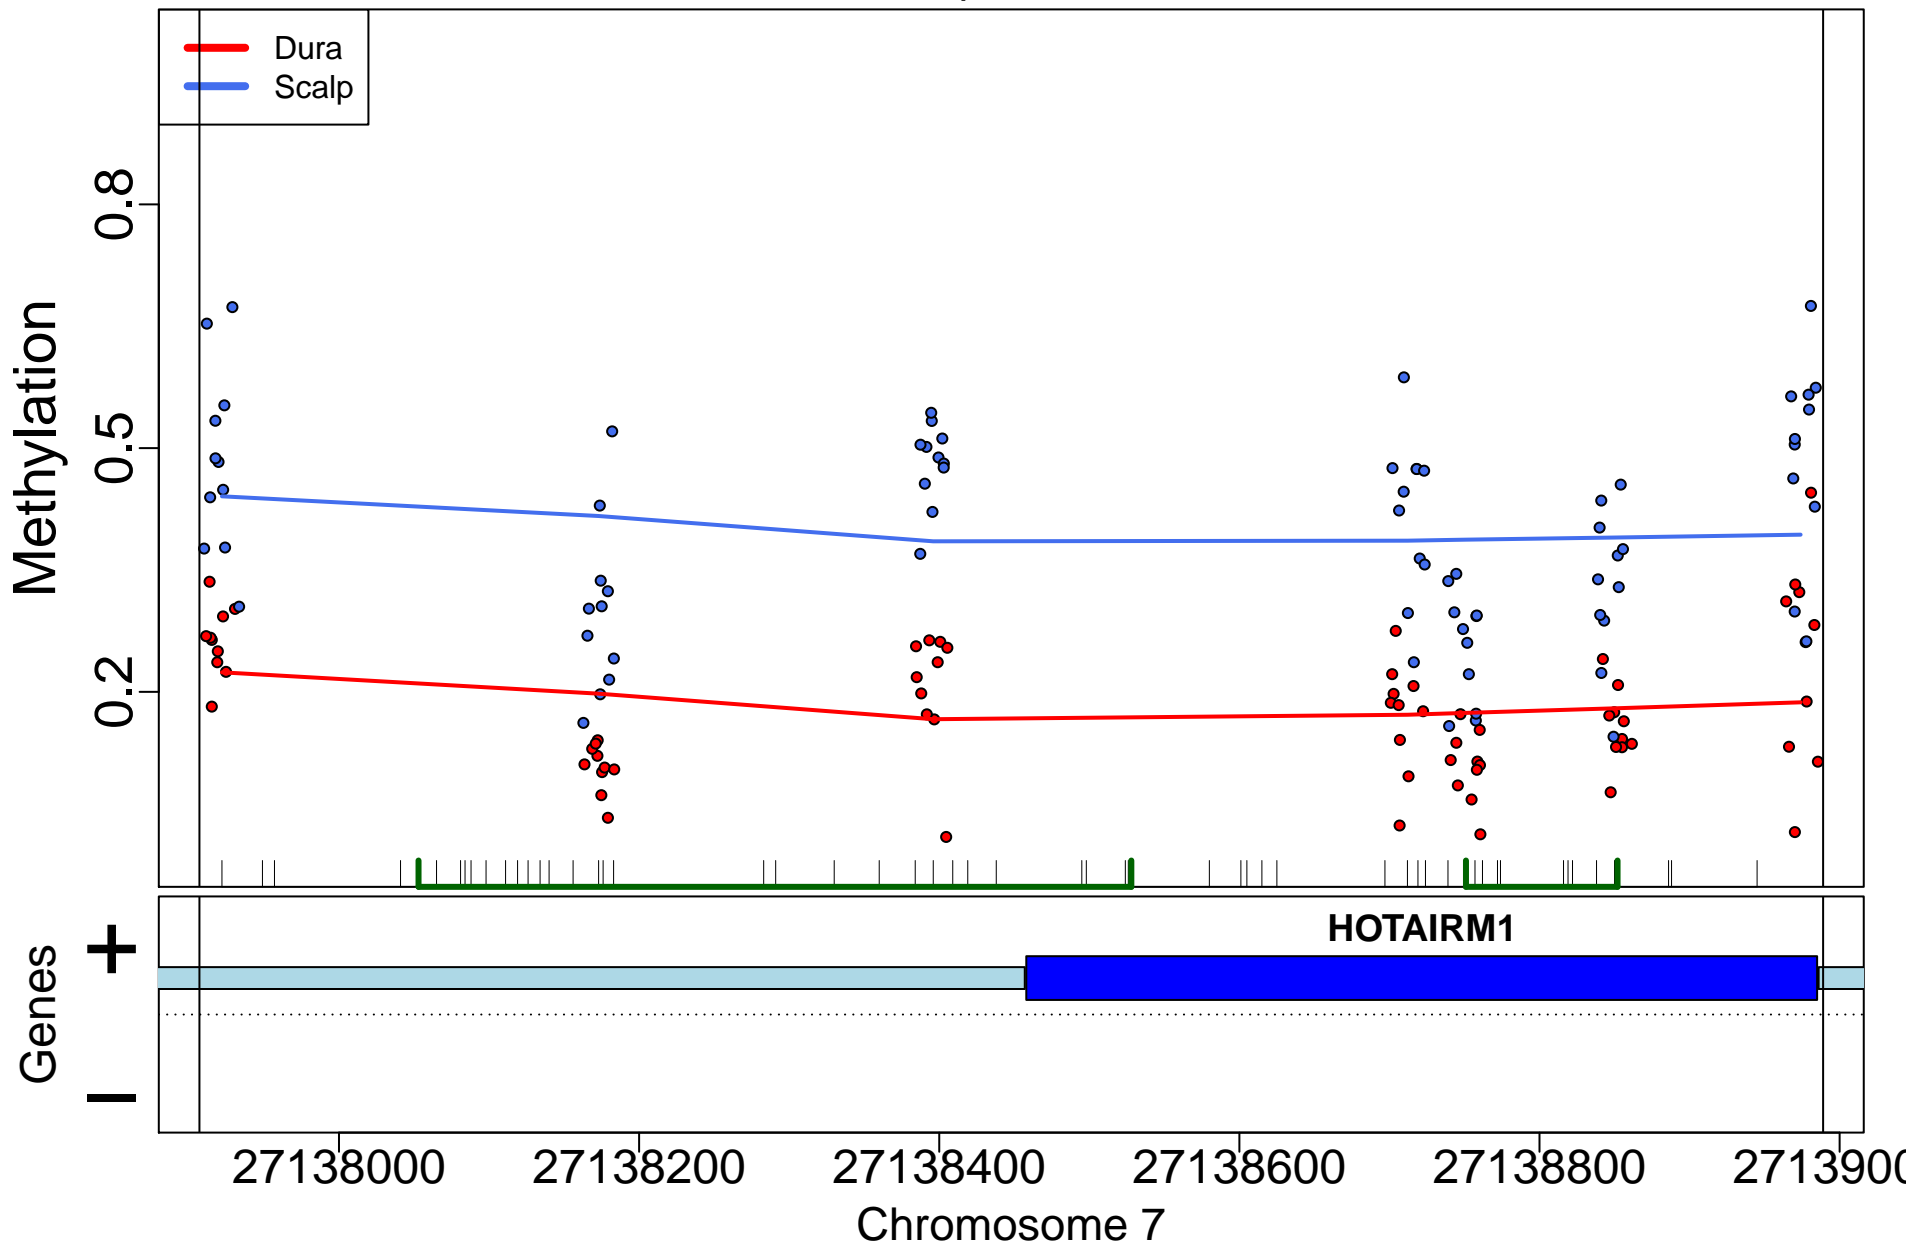

LOC100132891; 0bp from tss:NA

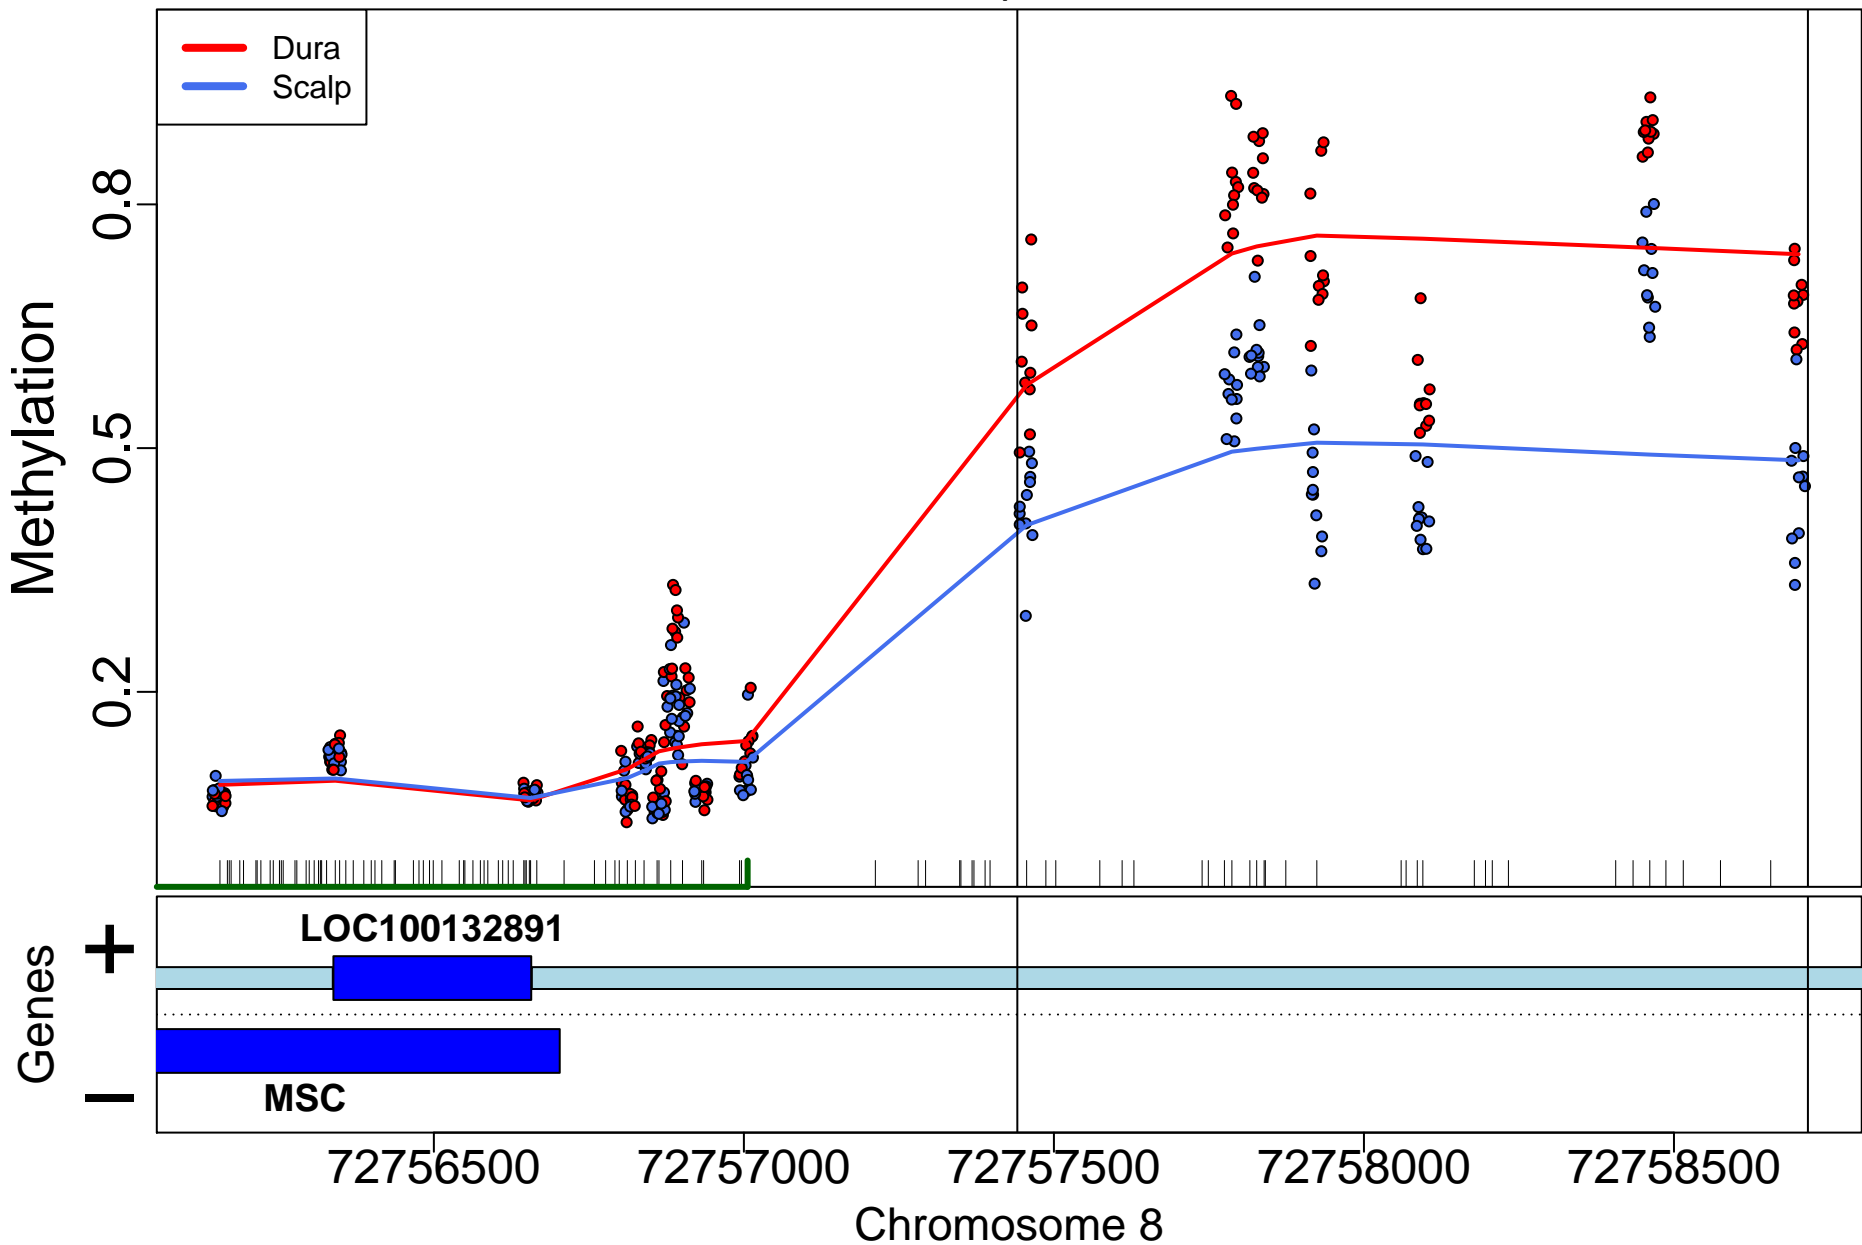

ATP6V0A4; 0bp from tss:overlaps 5'

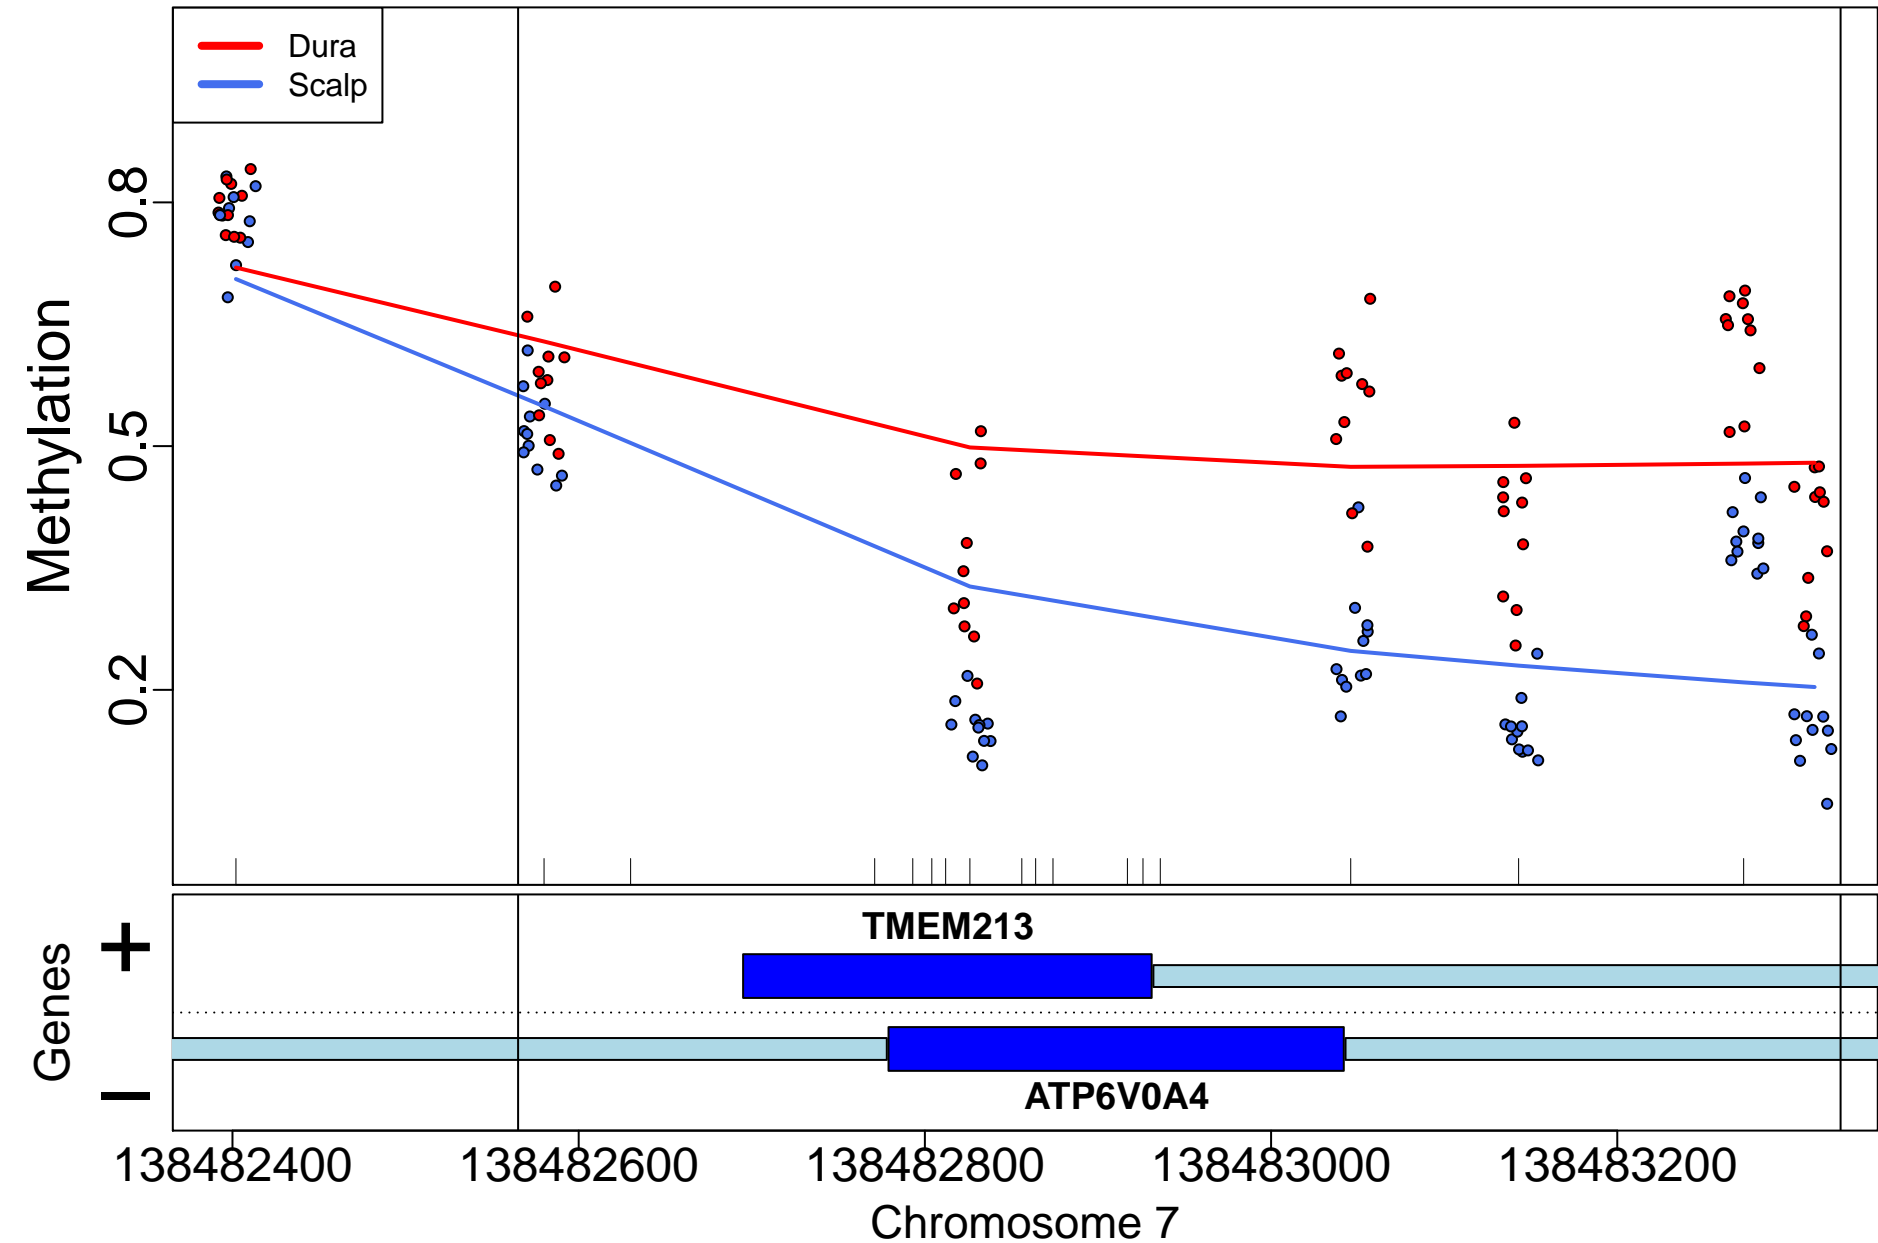

PLCL2; 80404bp from tss:inside intron

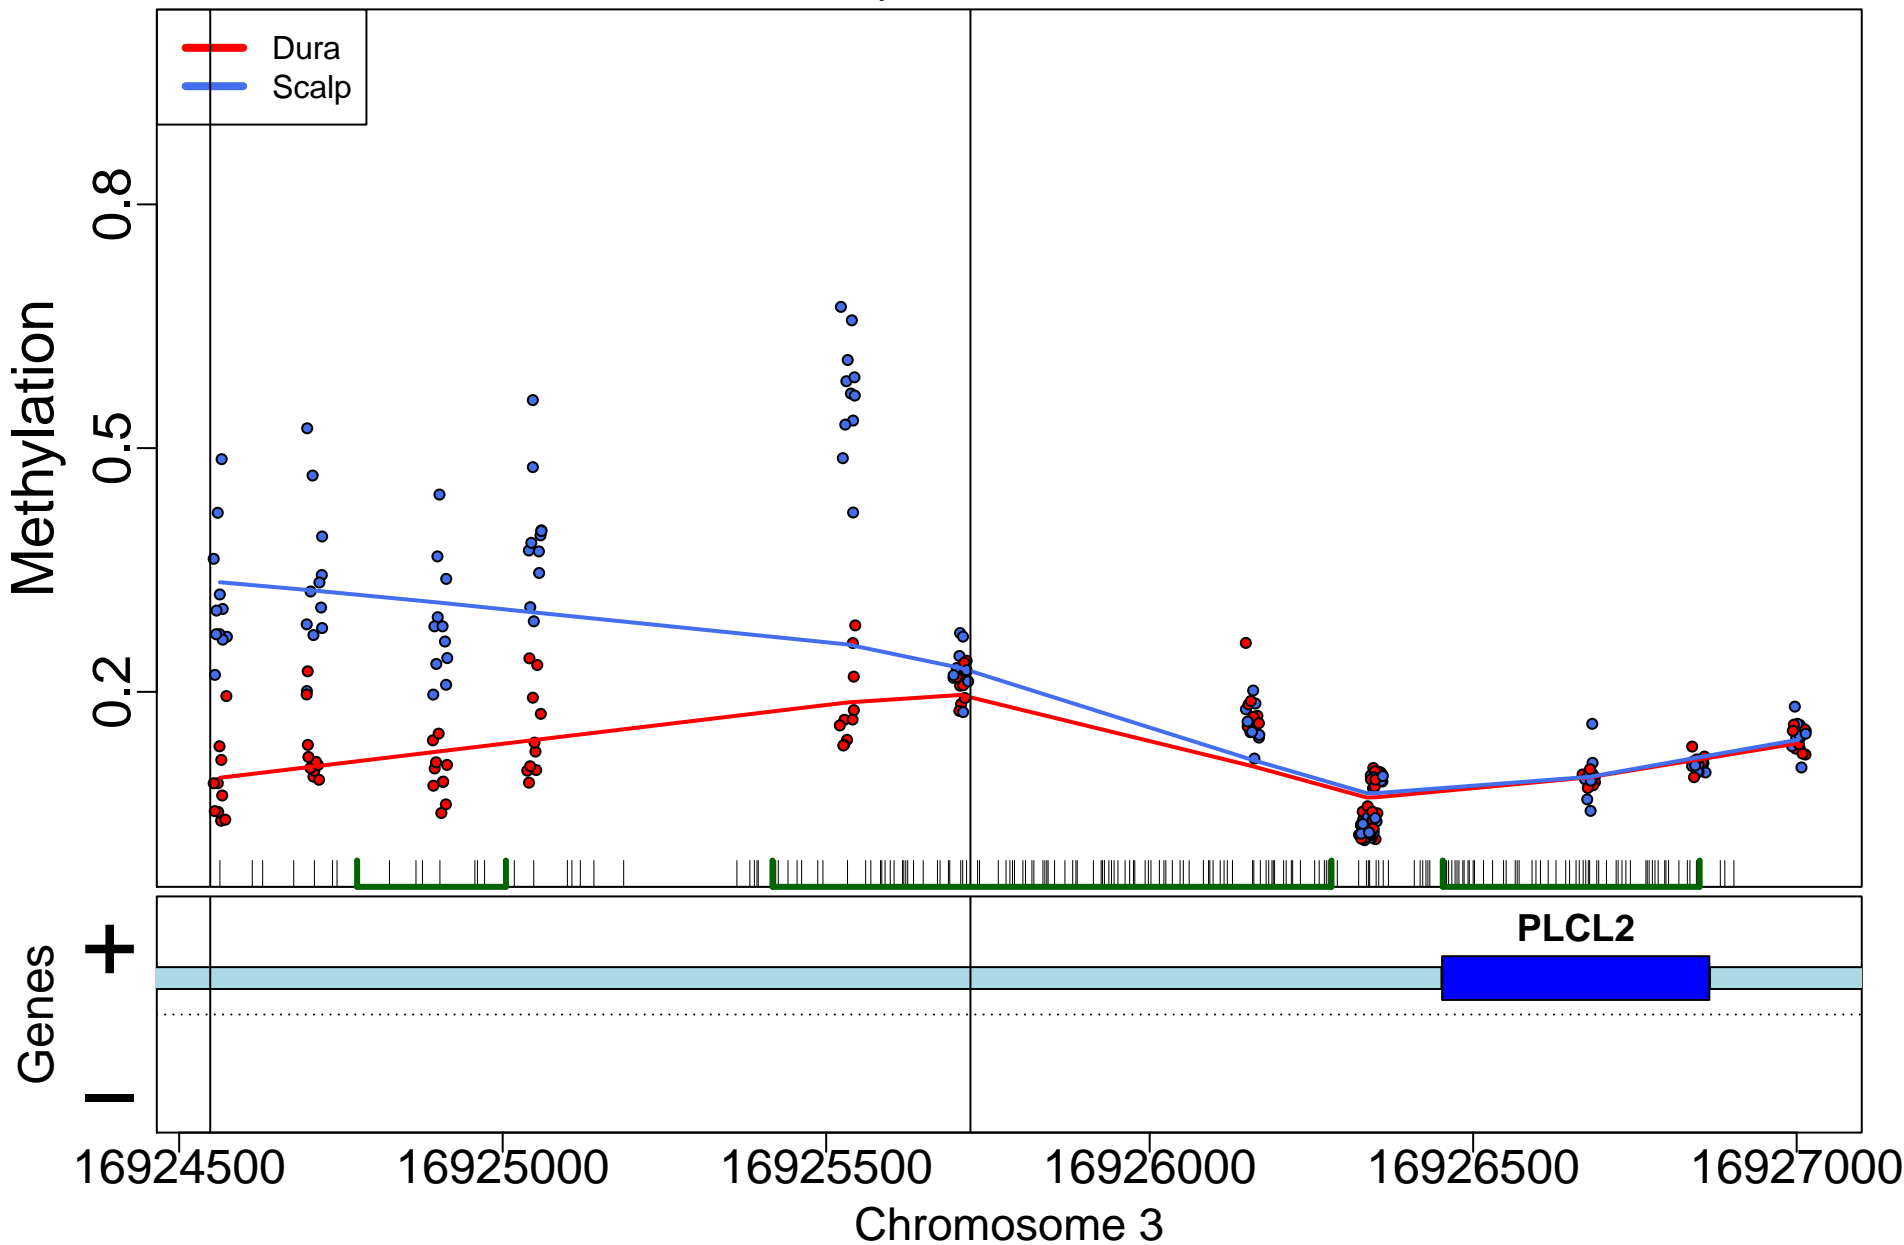

# GREM2; 118725bp from tss:inside exon

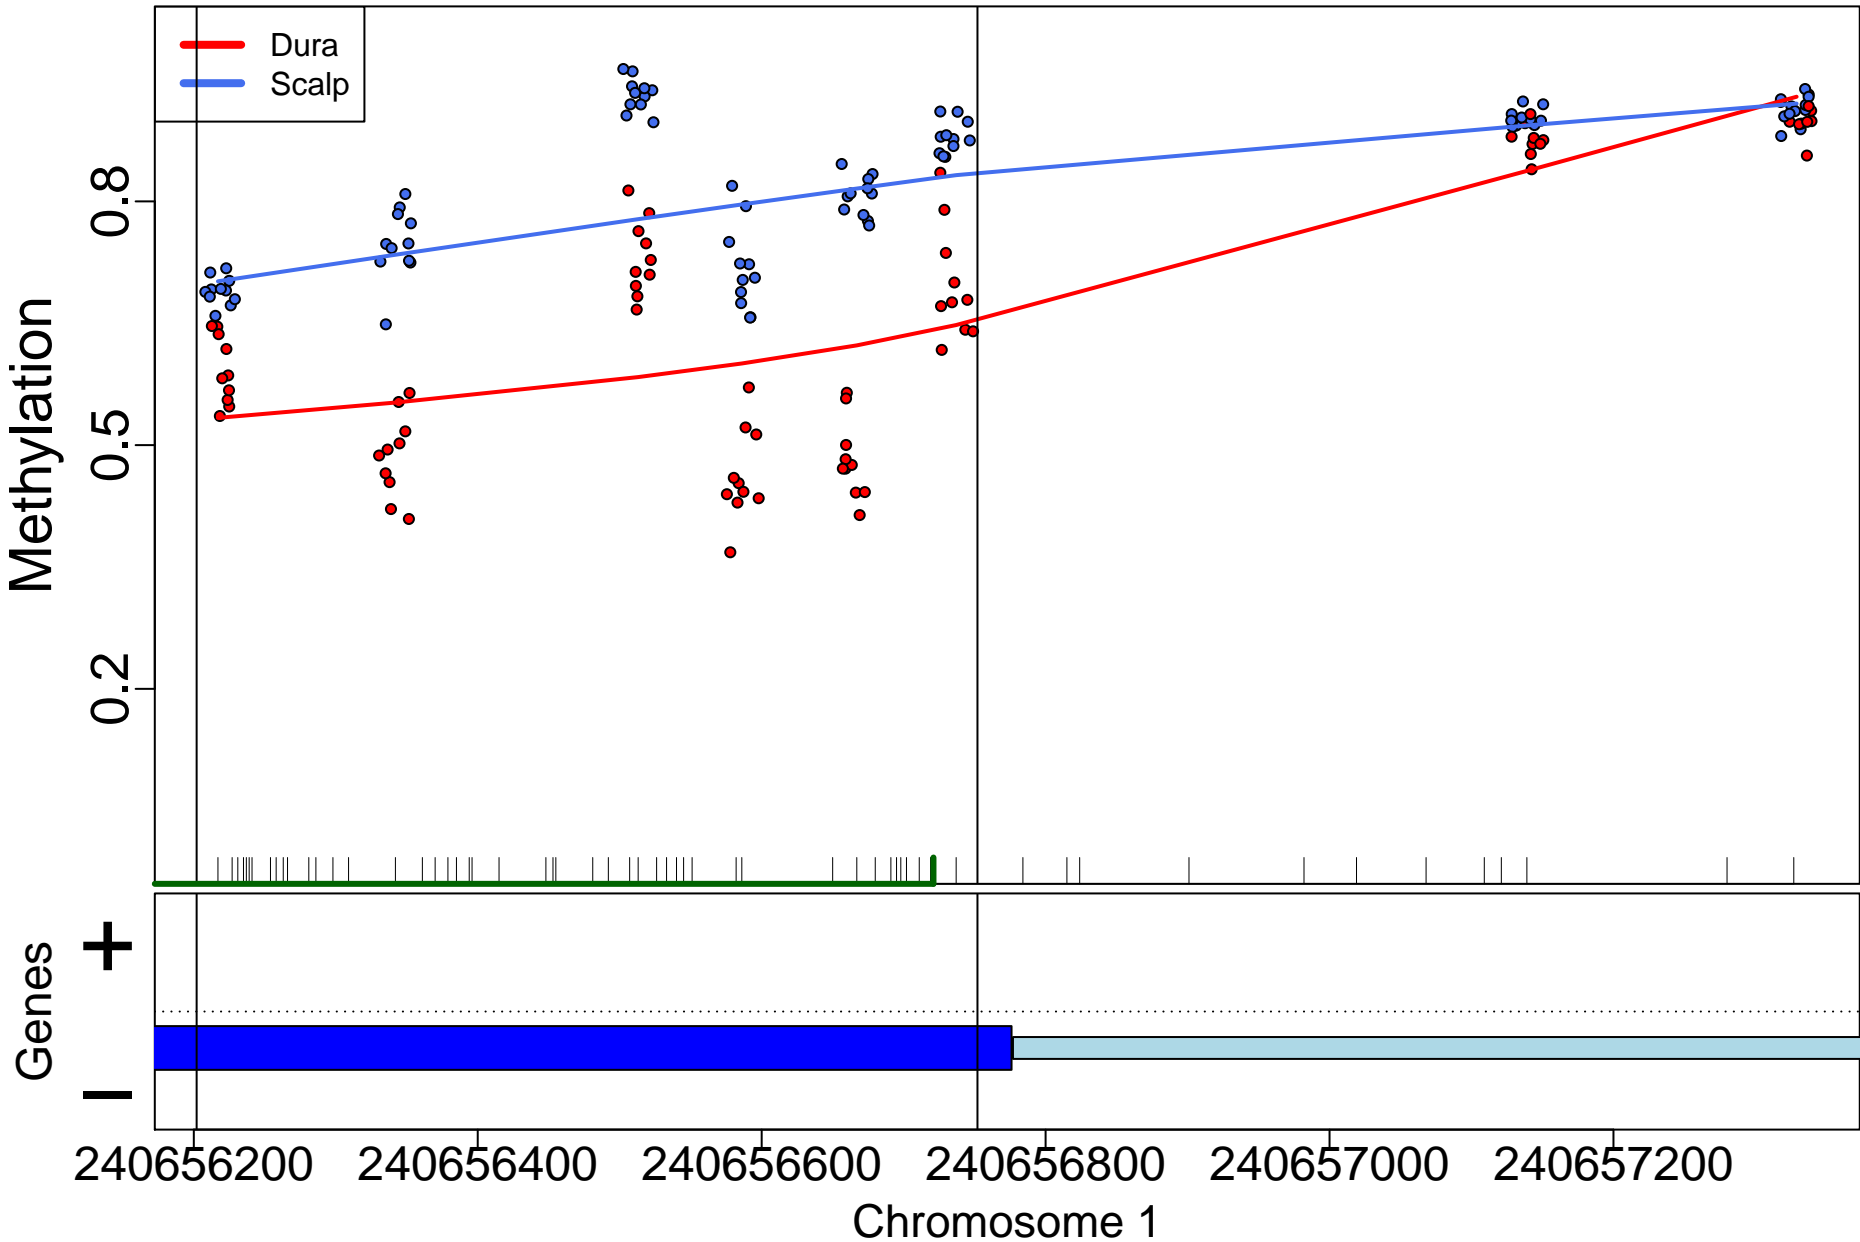

MORN1; 72133bp from tss:downstream

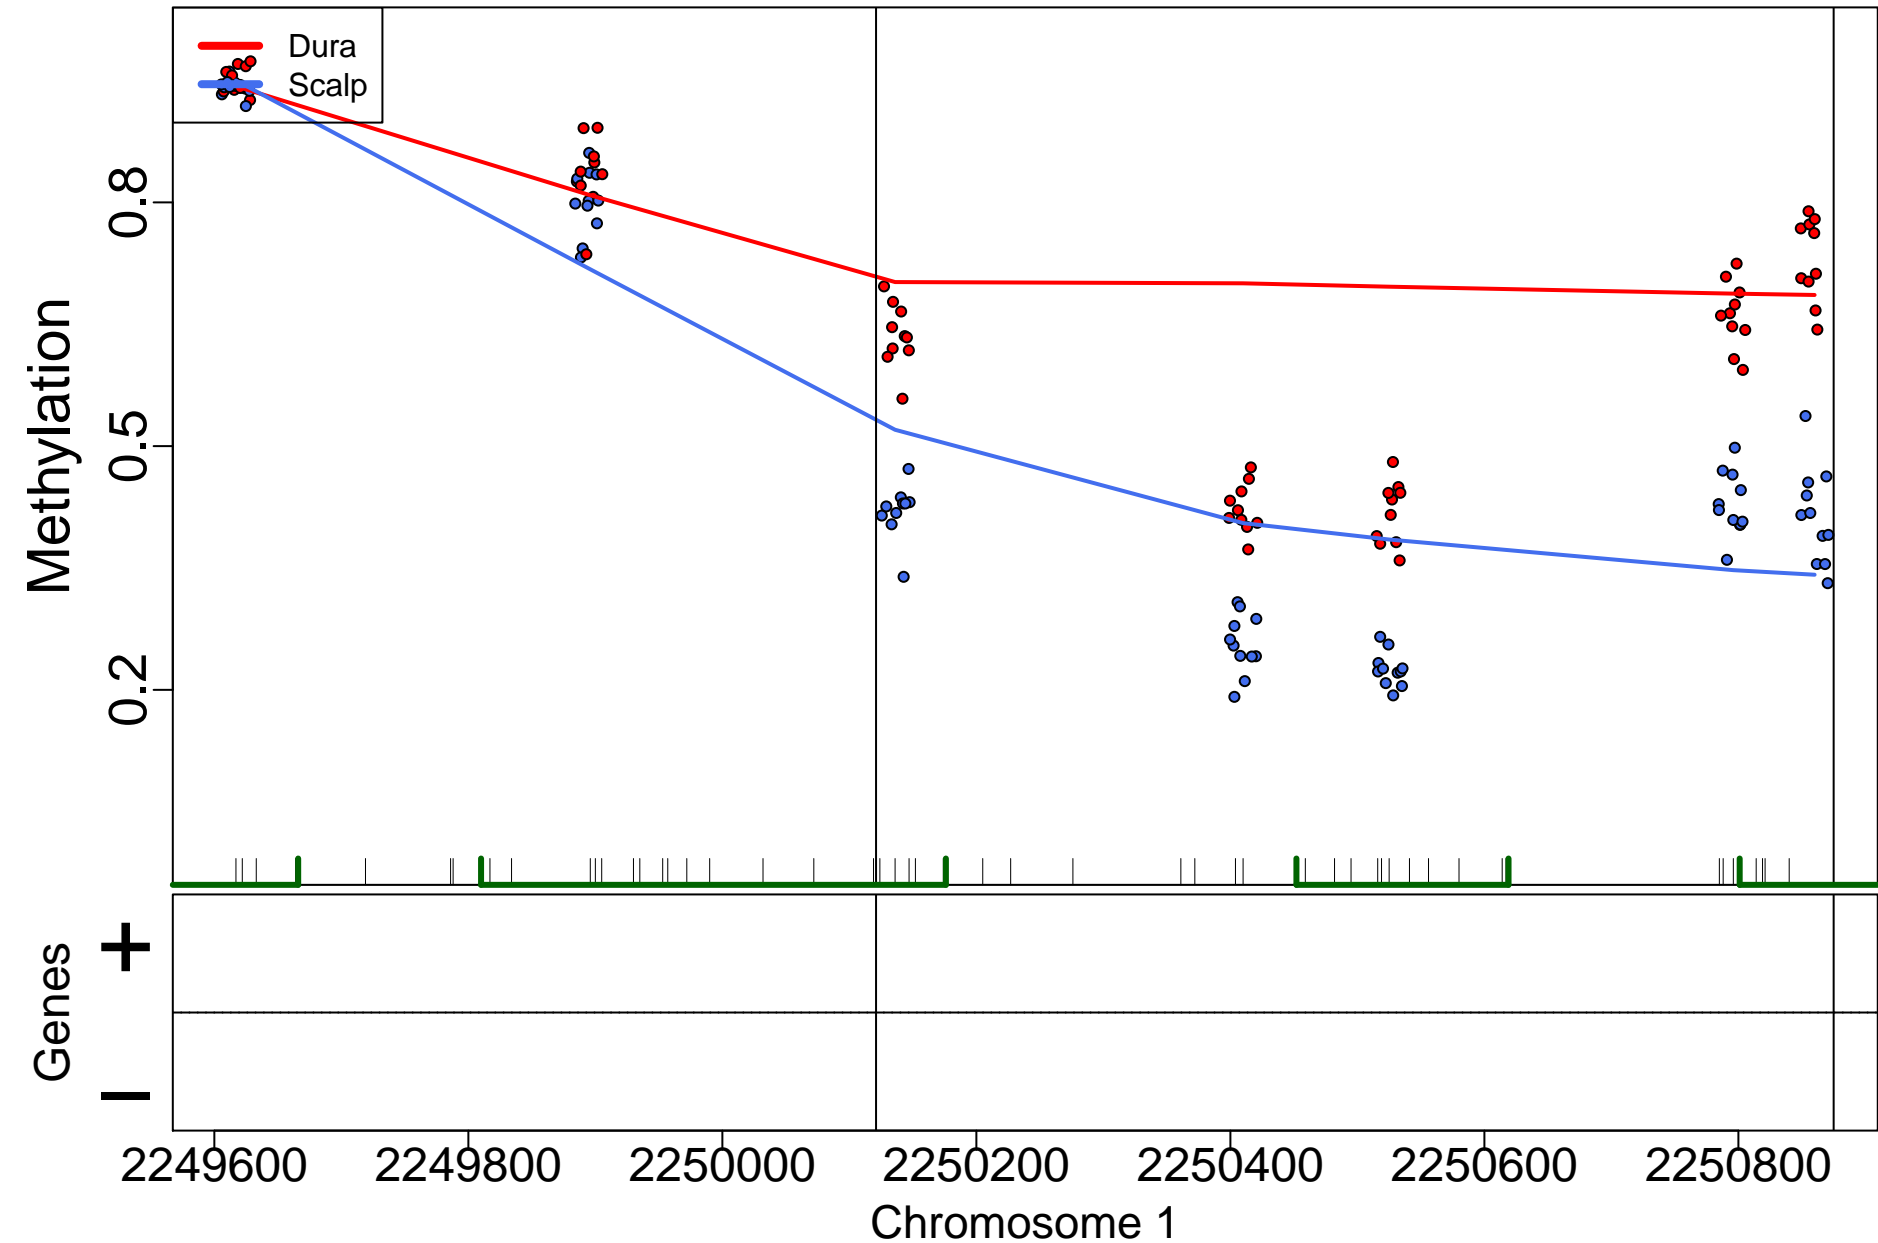





# ZNF273; 6262bp from tss:inside intron

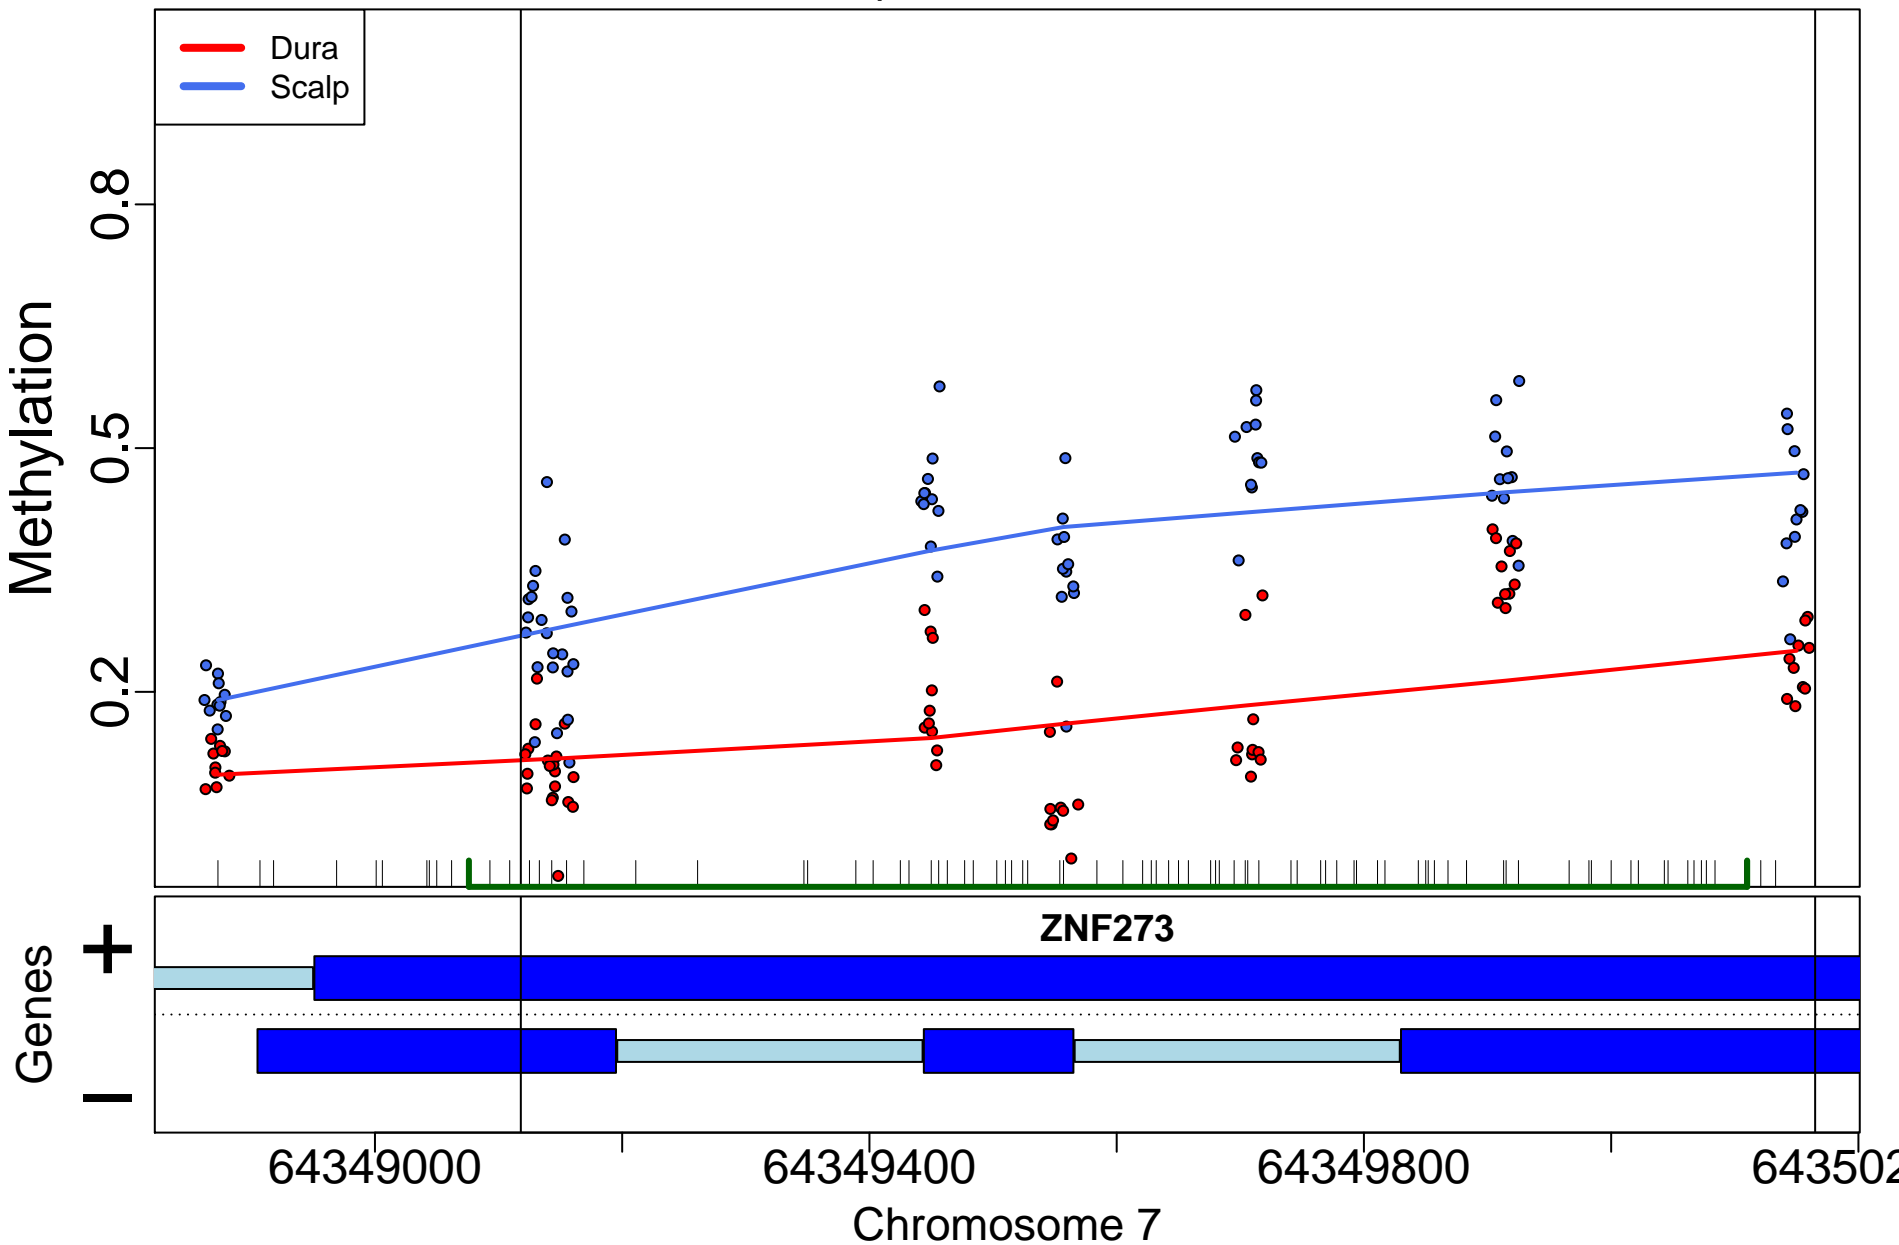

LINC00887; 0bp from tss:NA

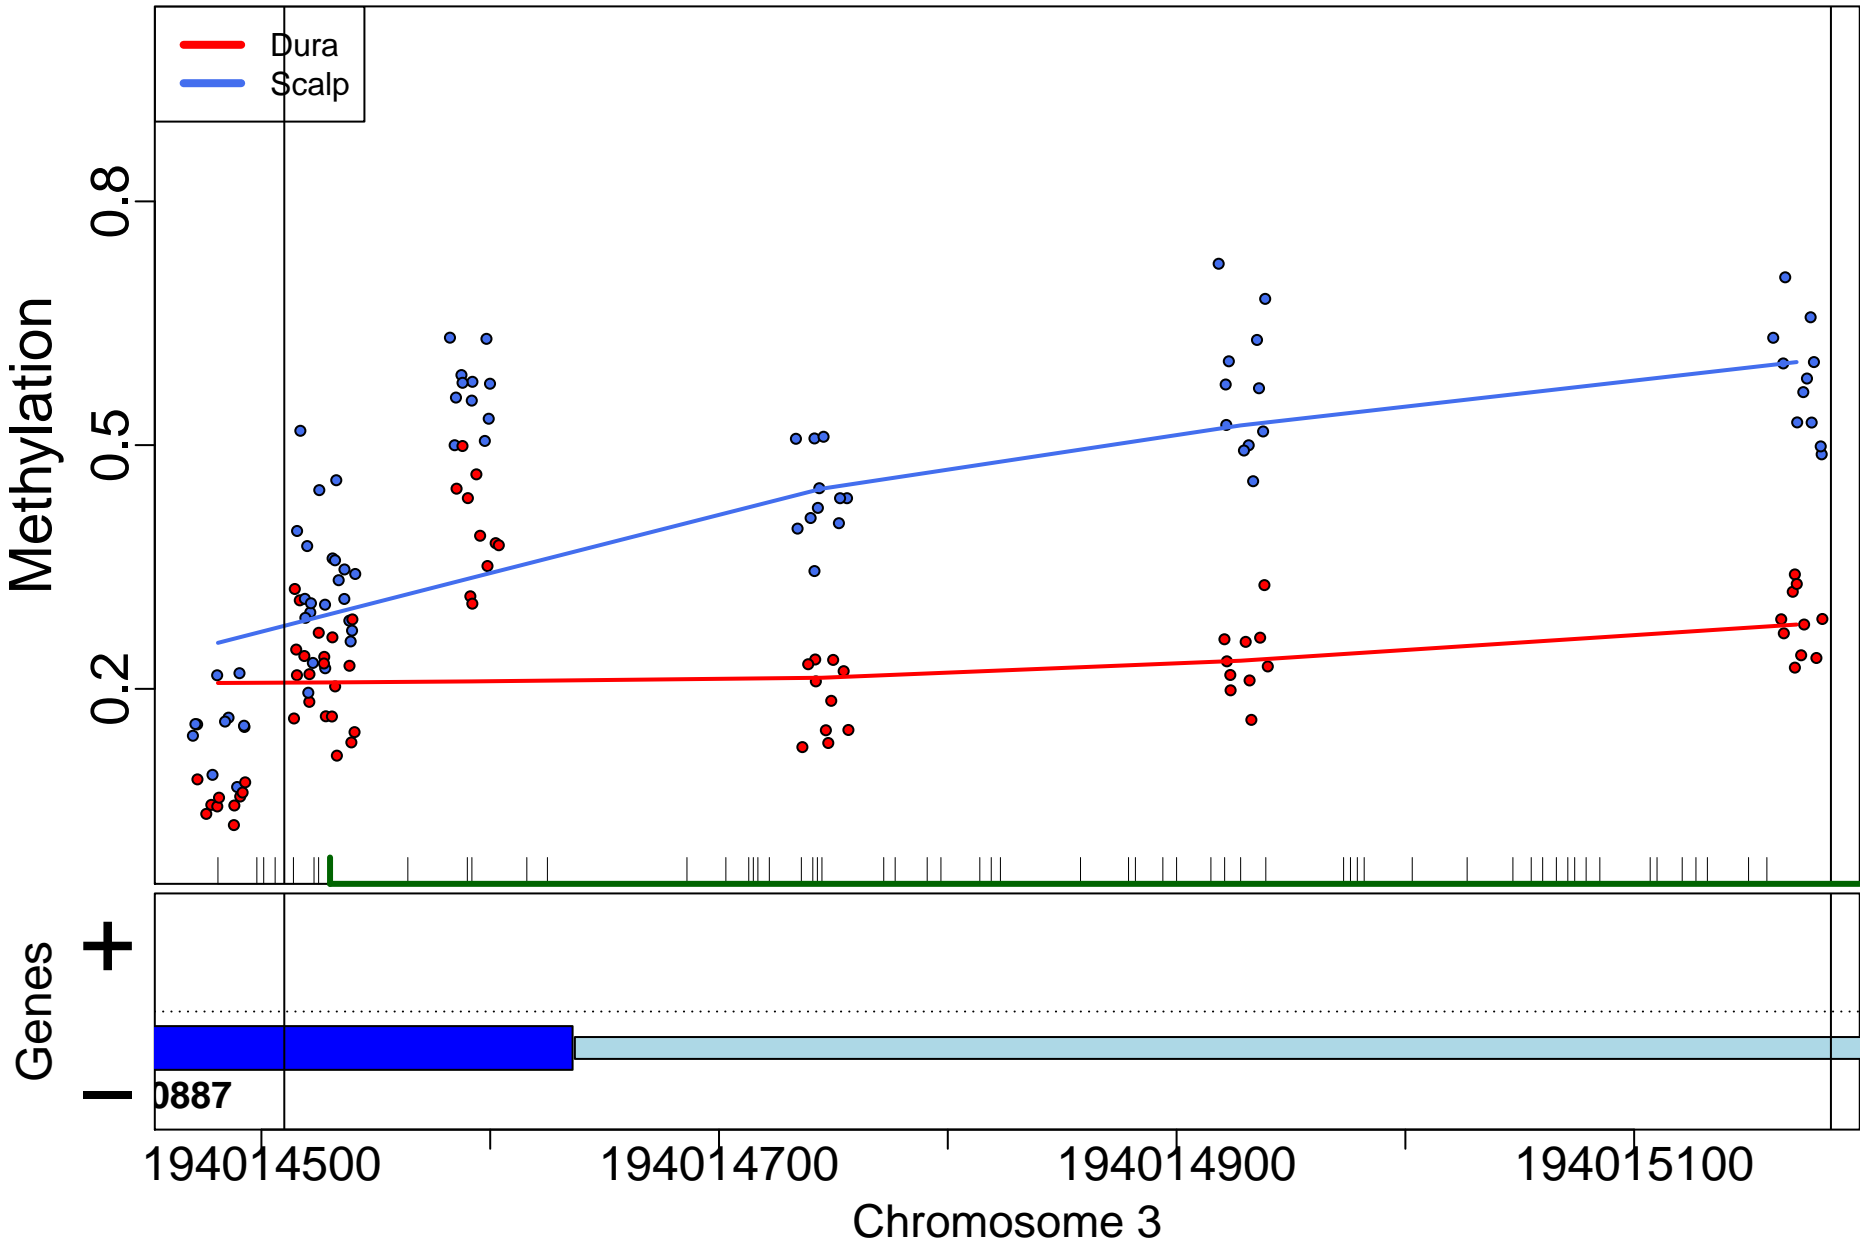

FOXL1; 161980bp from tss:downstream

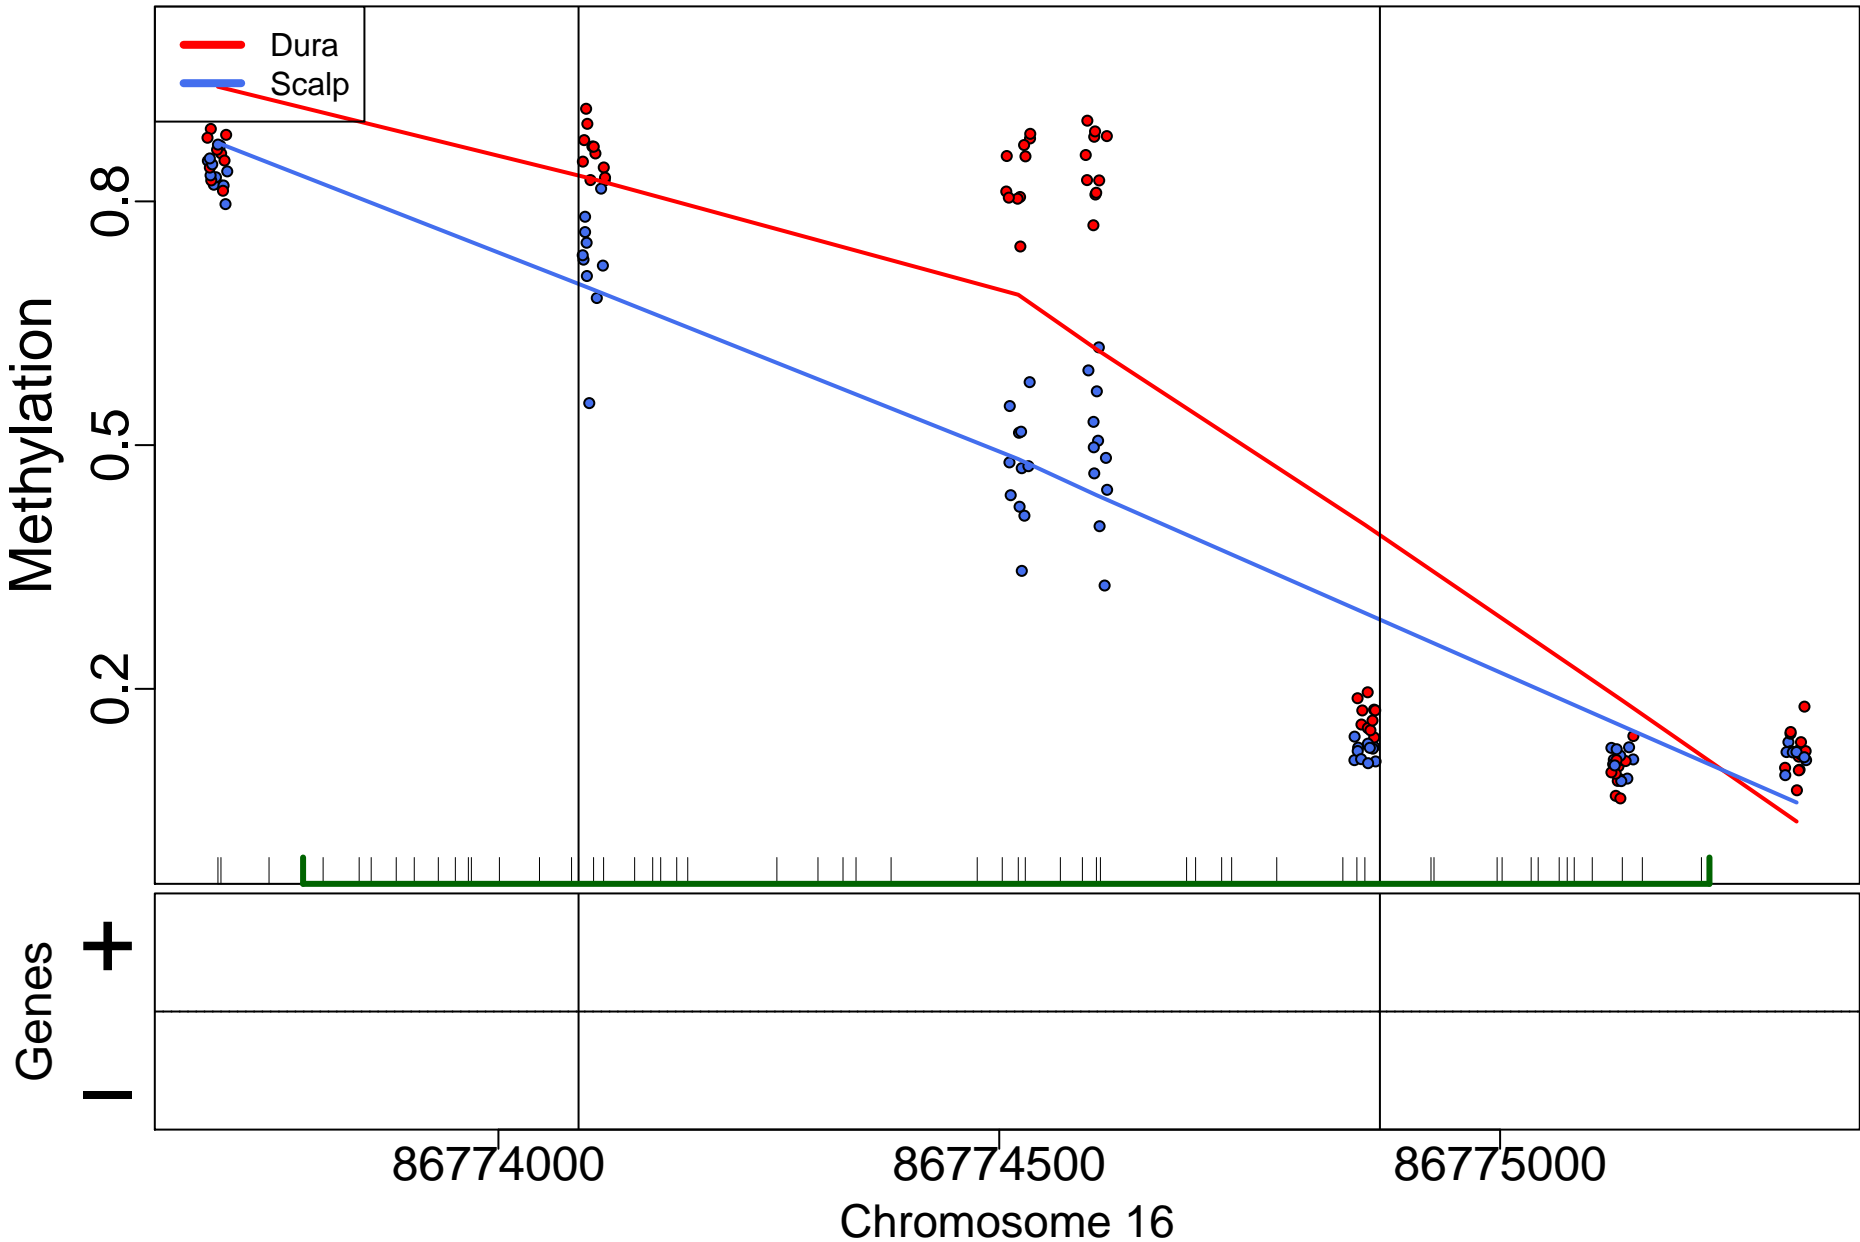

# FOXP1; 686bp from tss:promoter

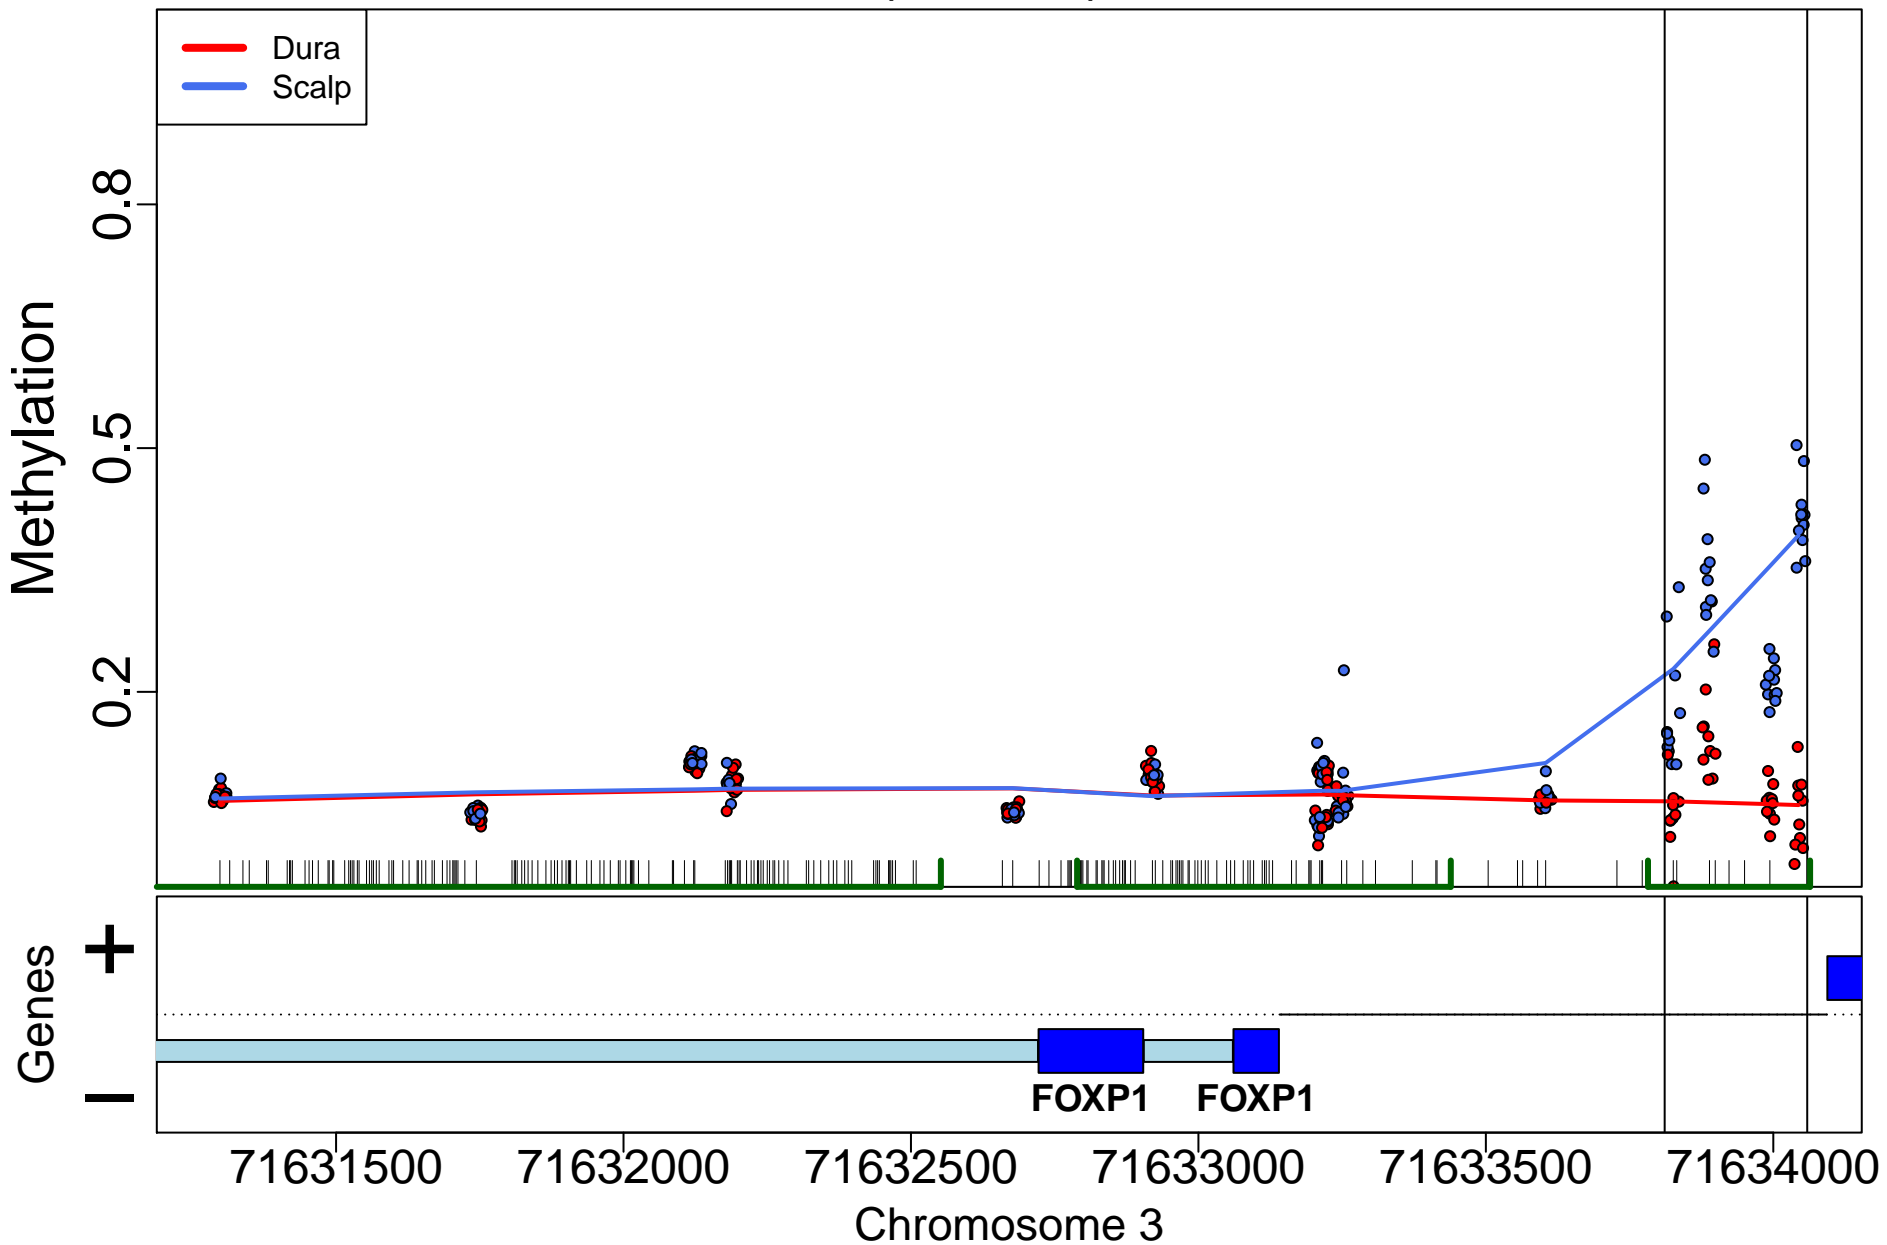

MKNK2; 83bp from tss:covers exon(s)

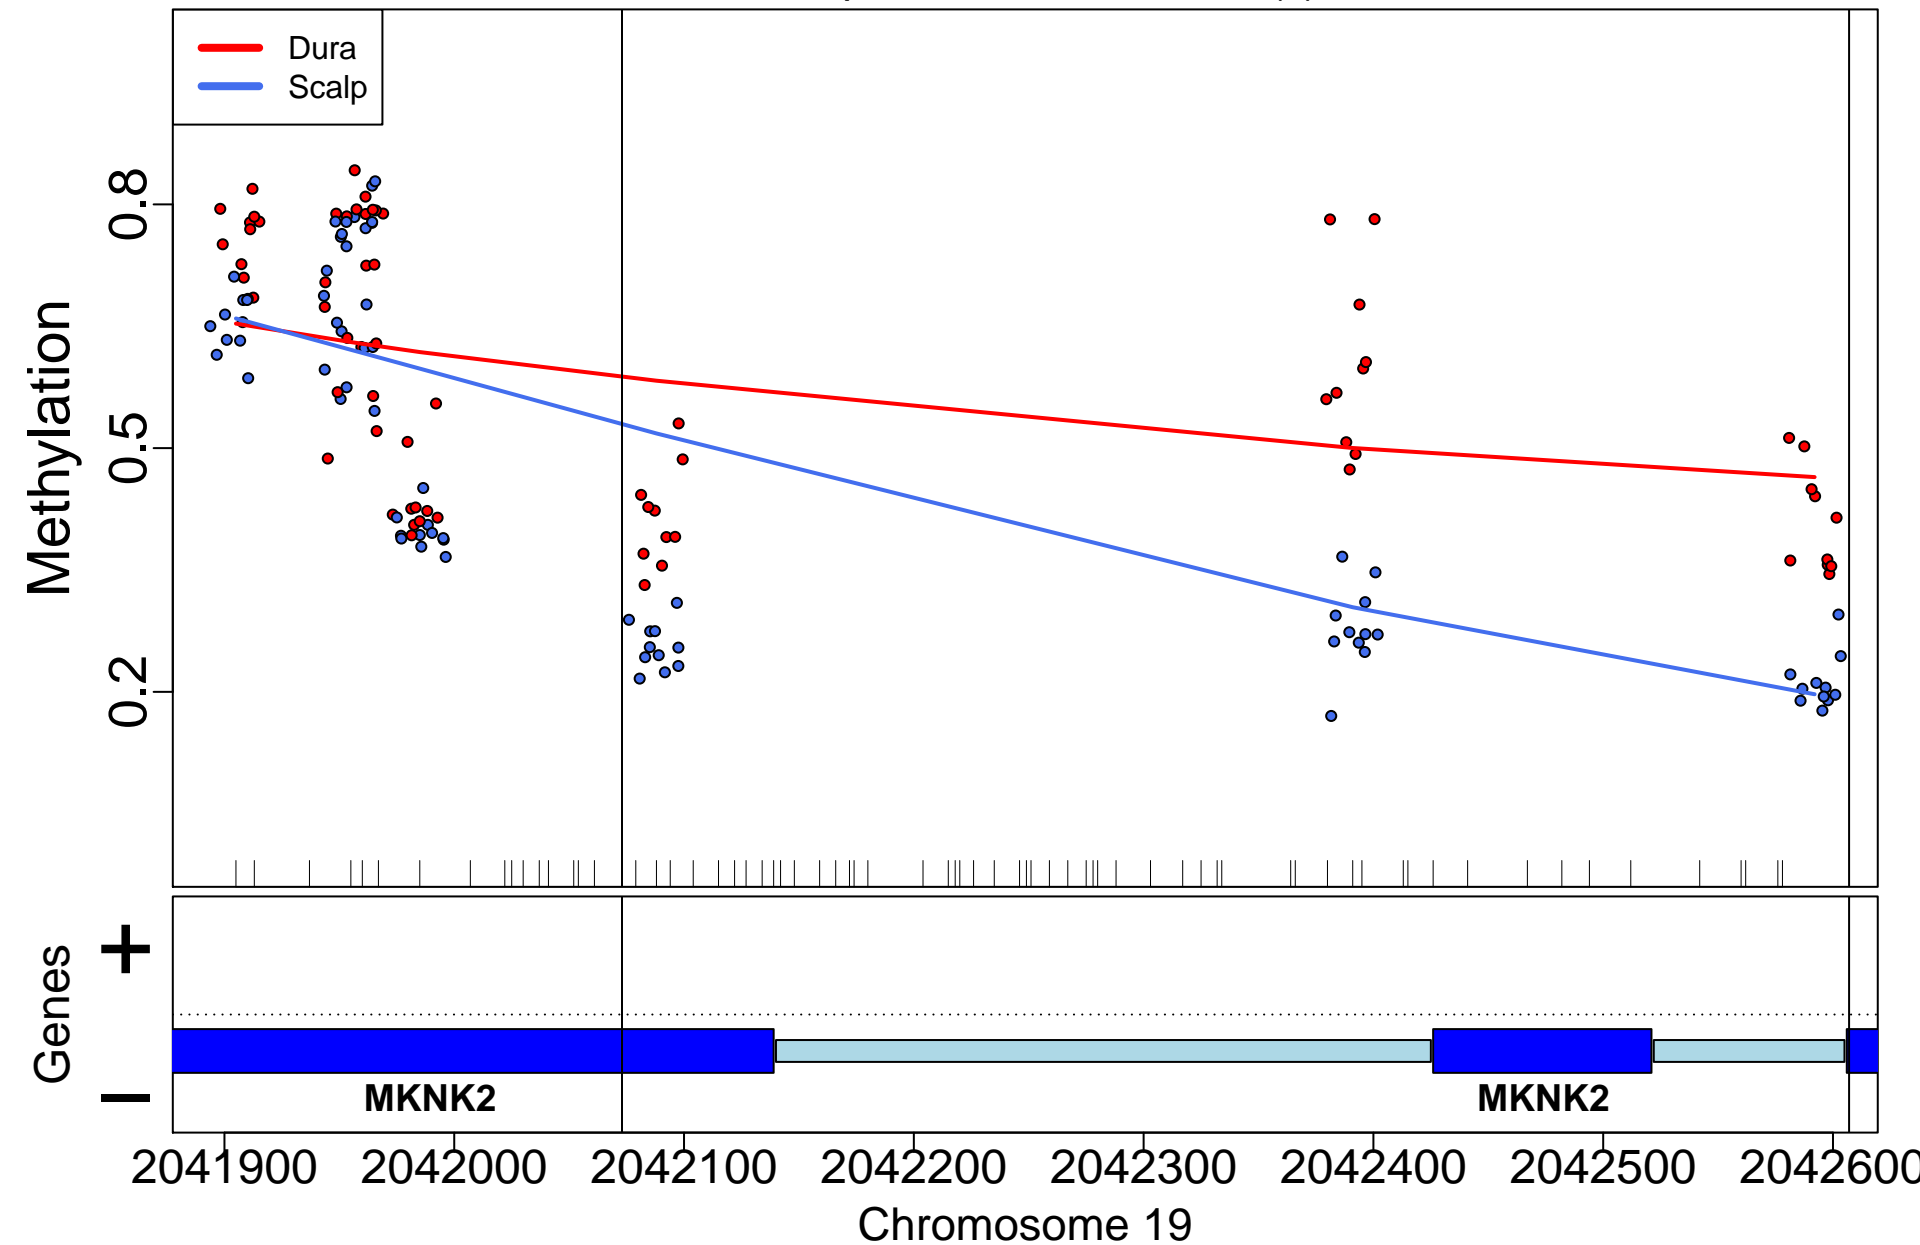

RNF207; 564bp from tss:inside exon

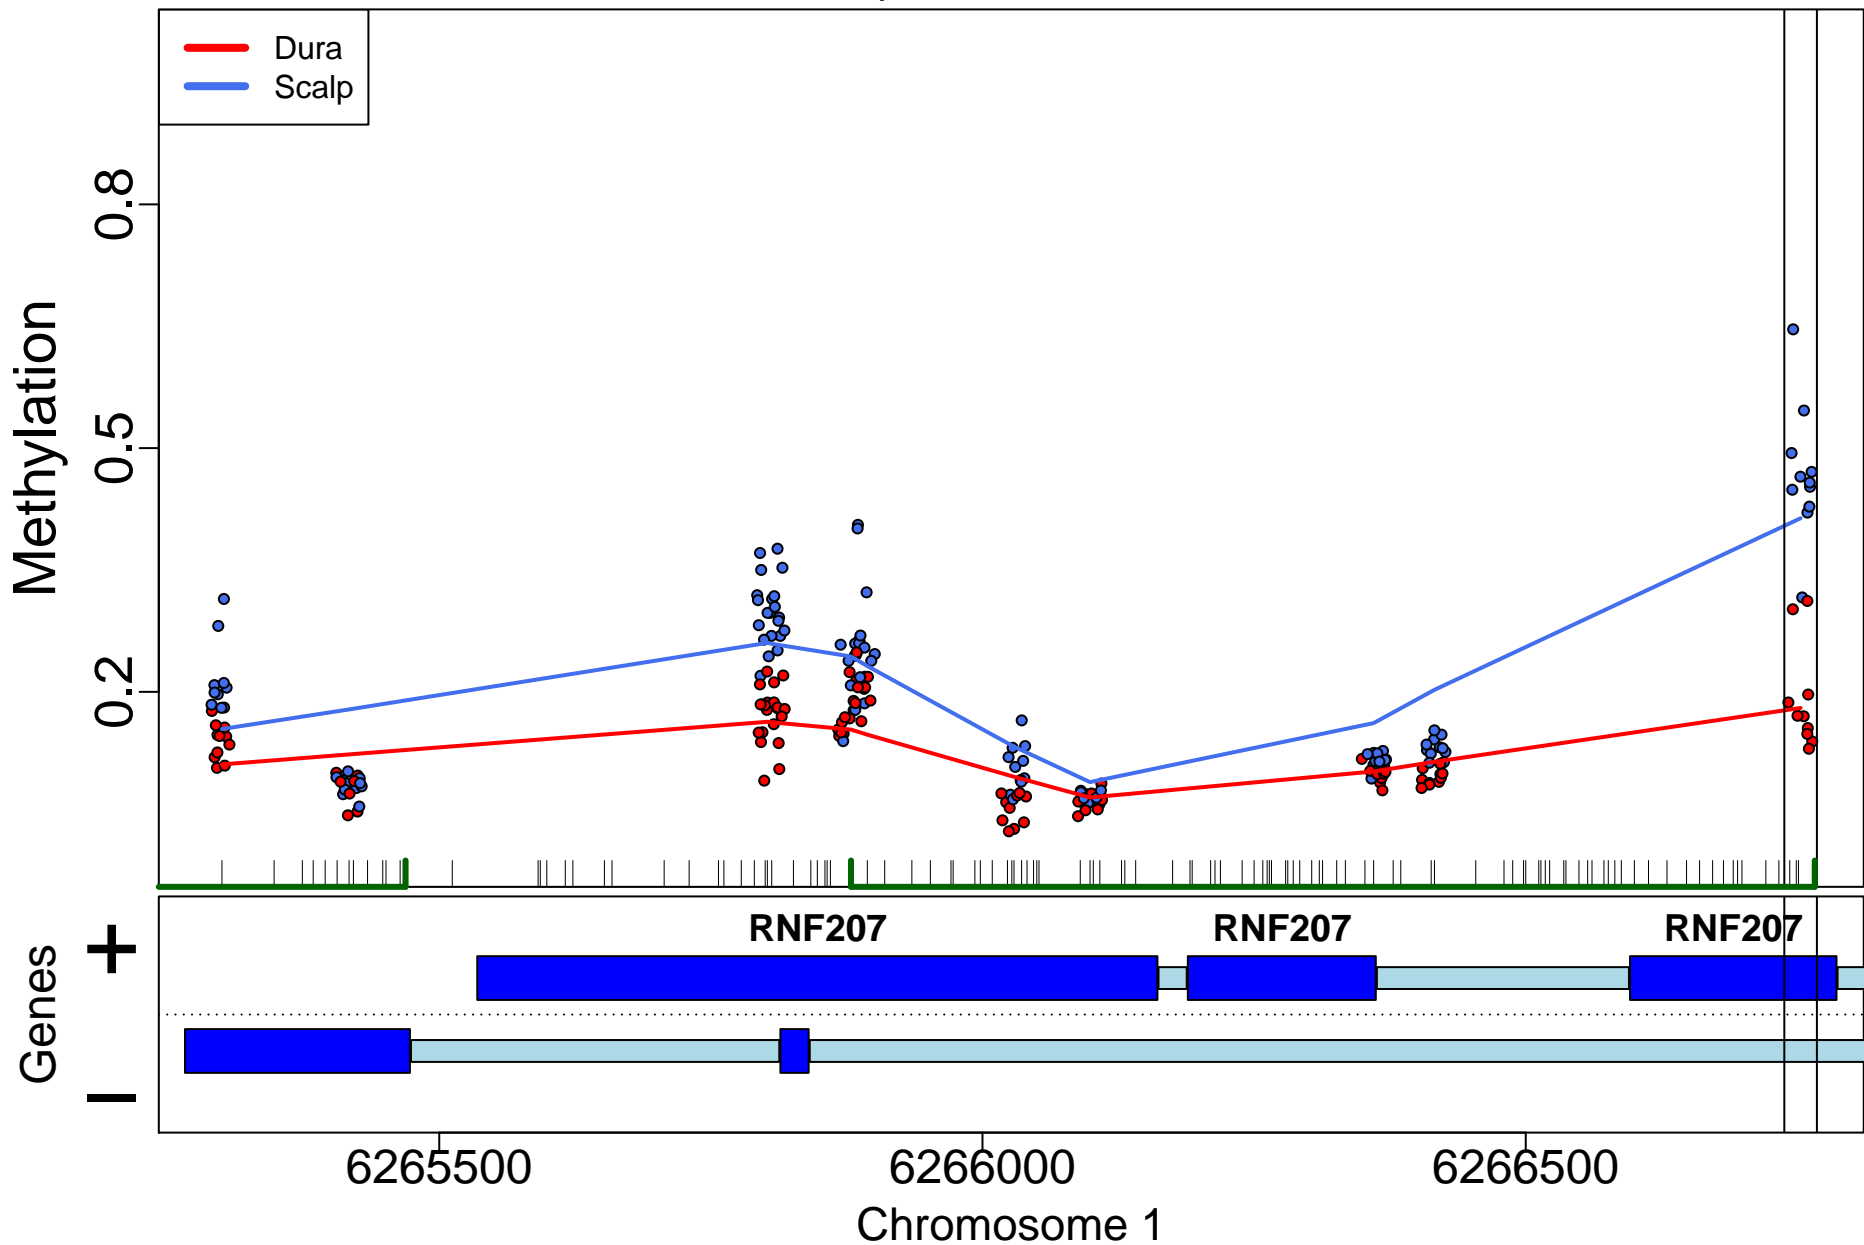

CRYGN; 0bp from tss:NA

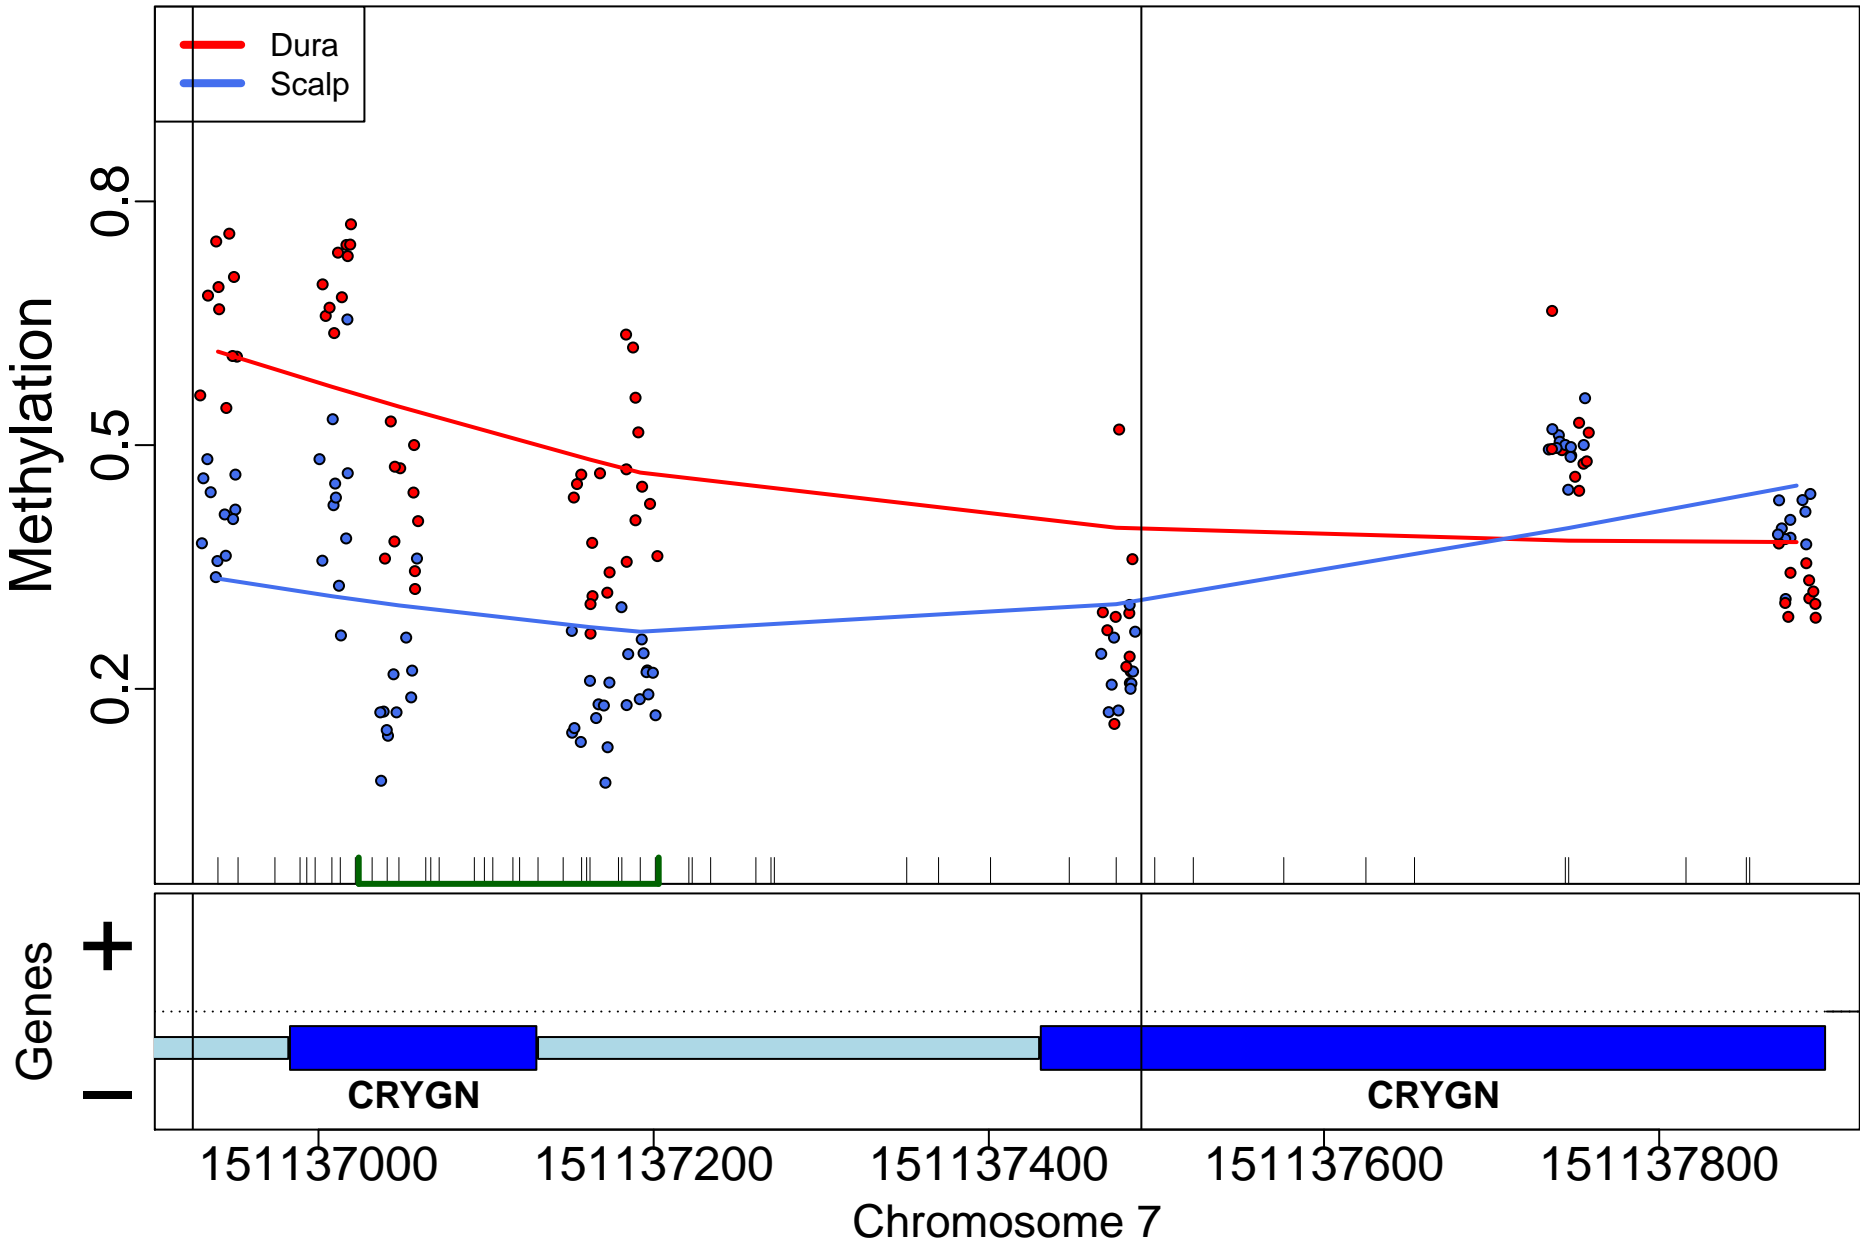

GAD1; 1405bp from tss:promoter

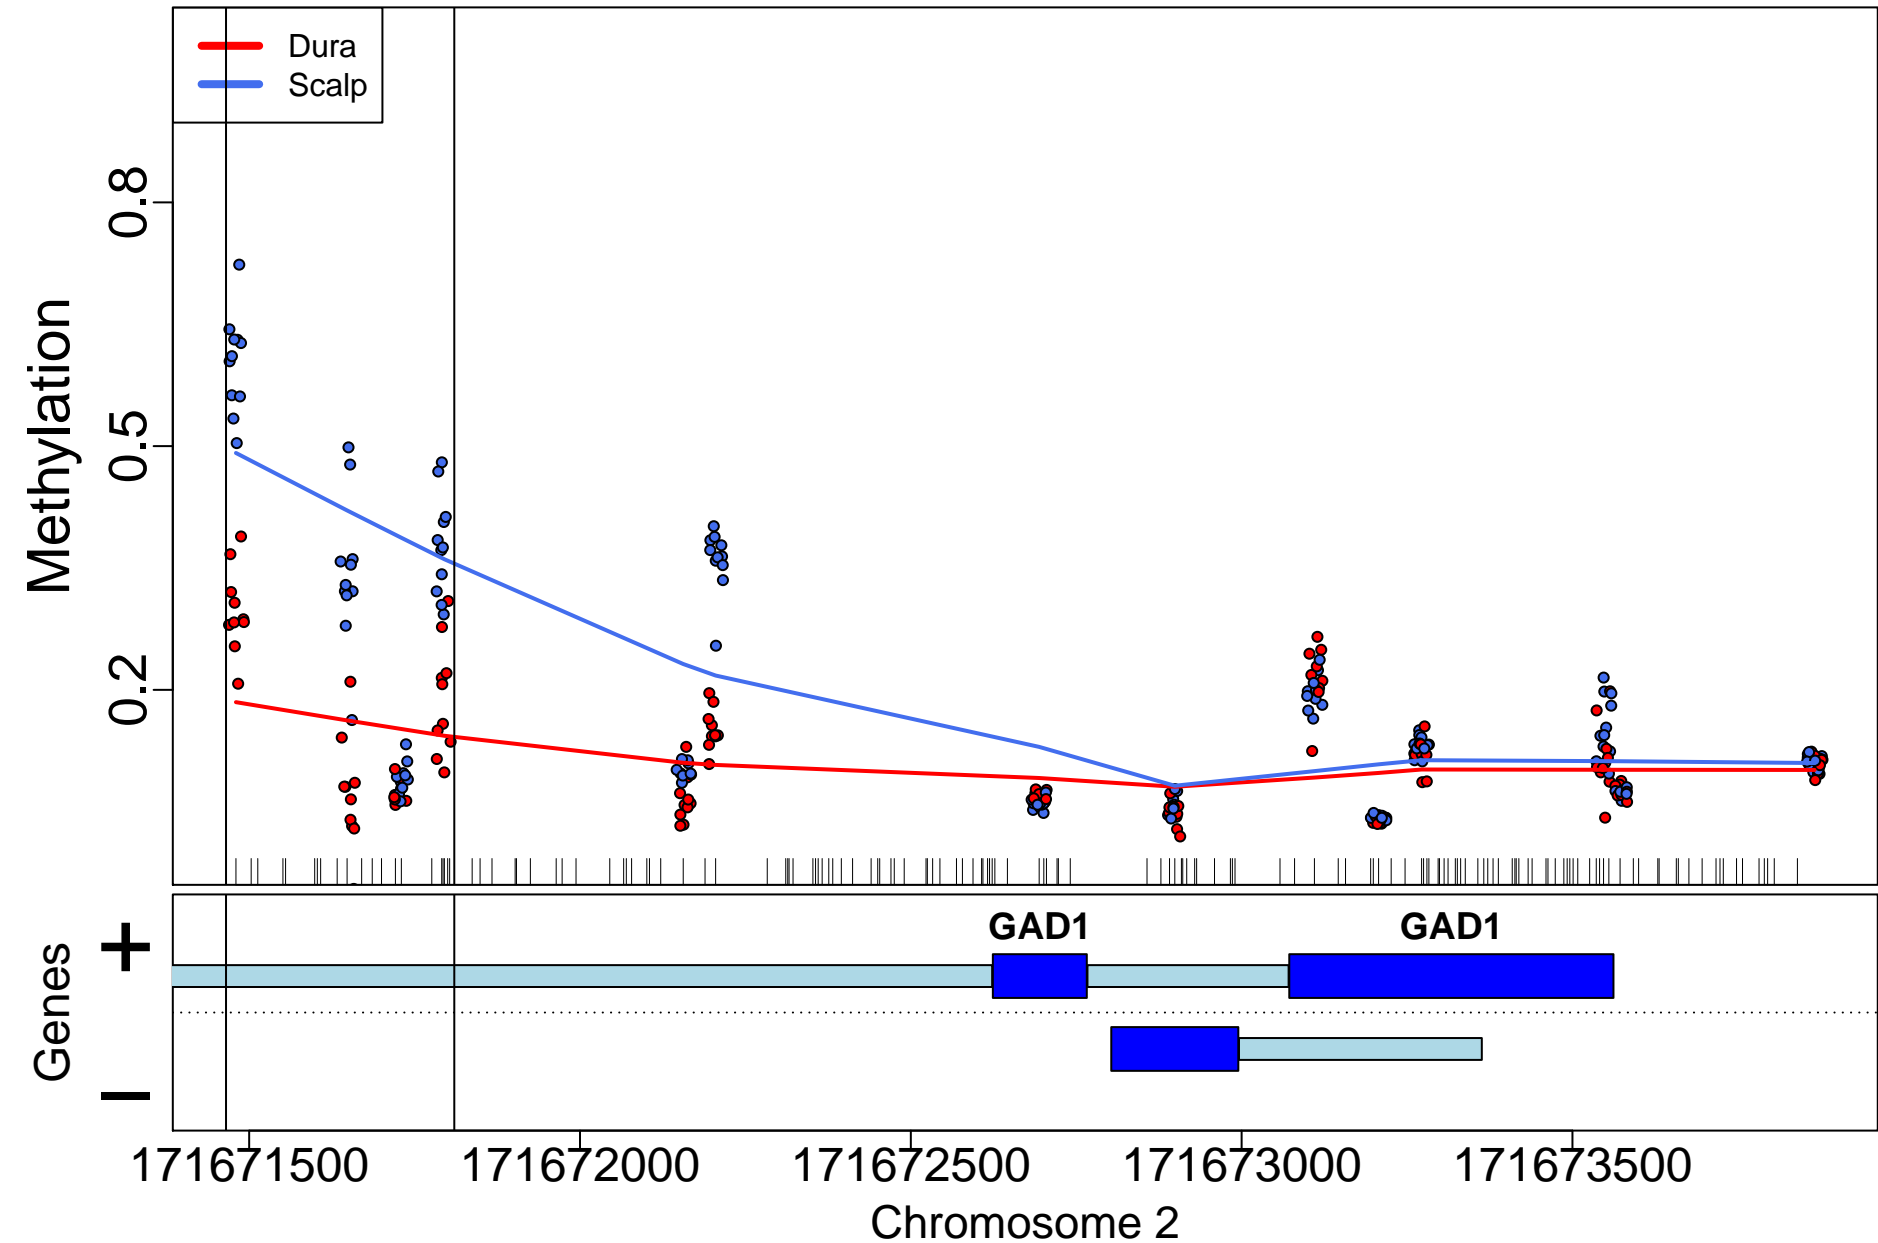



TAGLN; 445bp from tss:inside exon

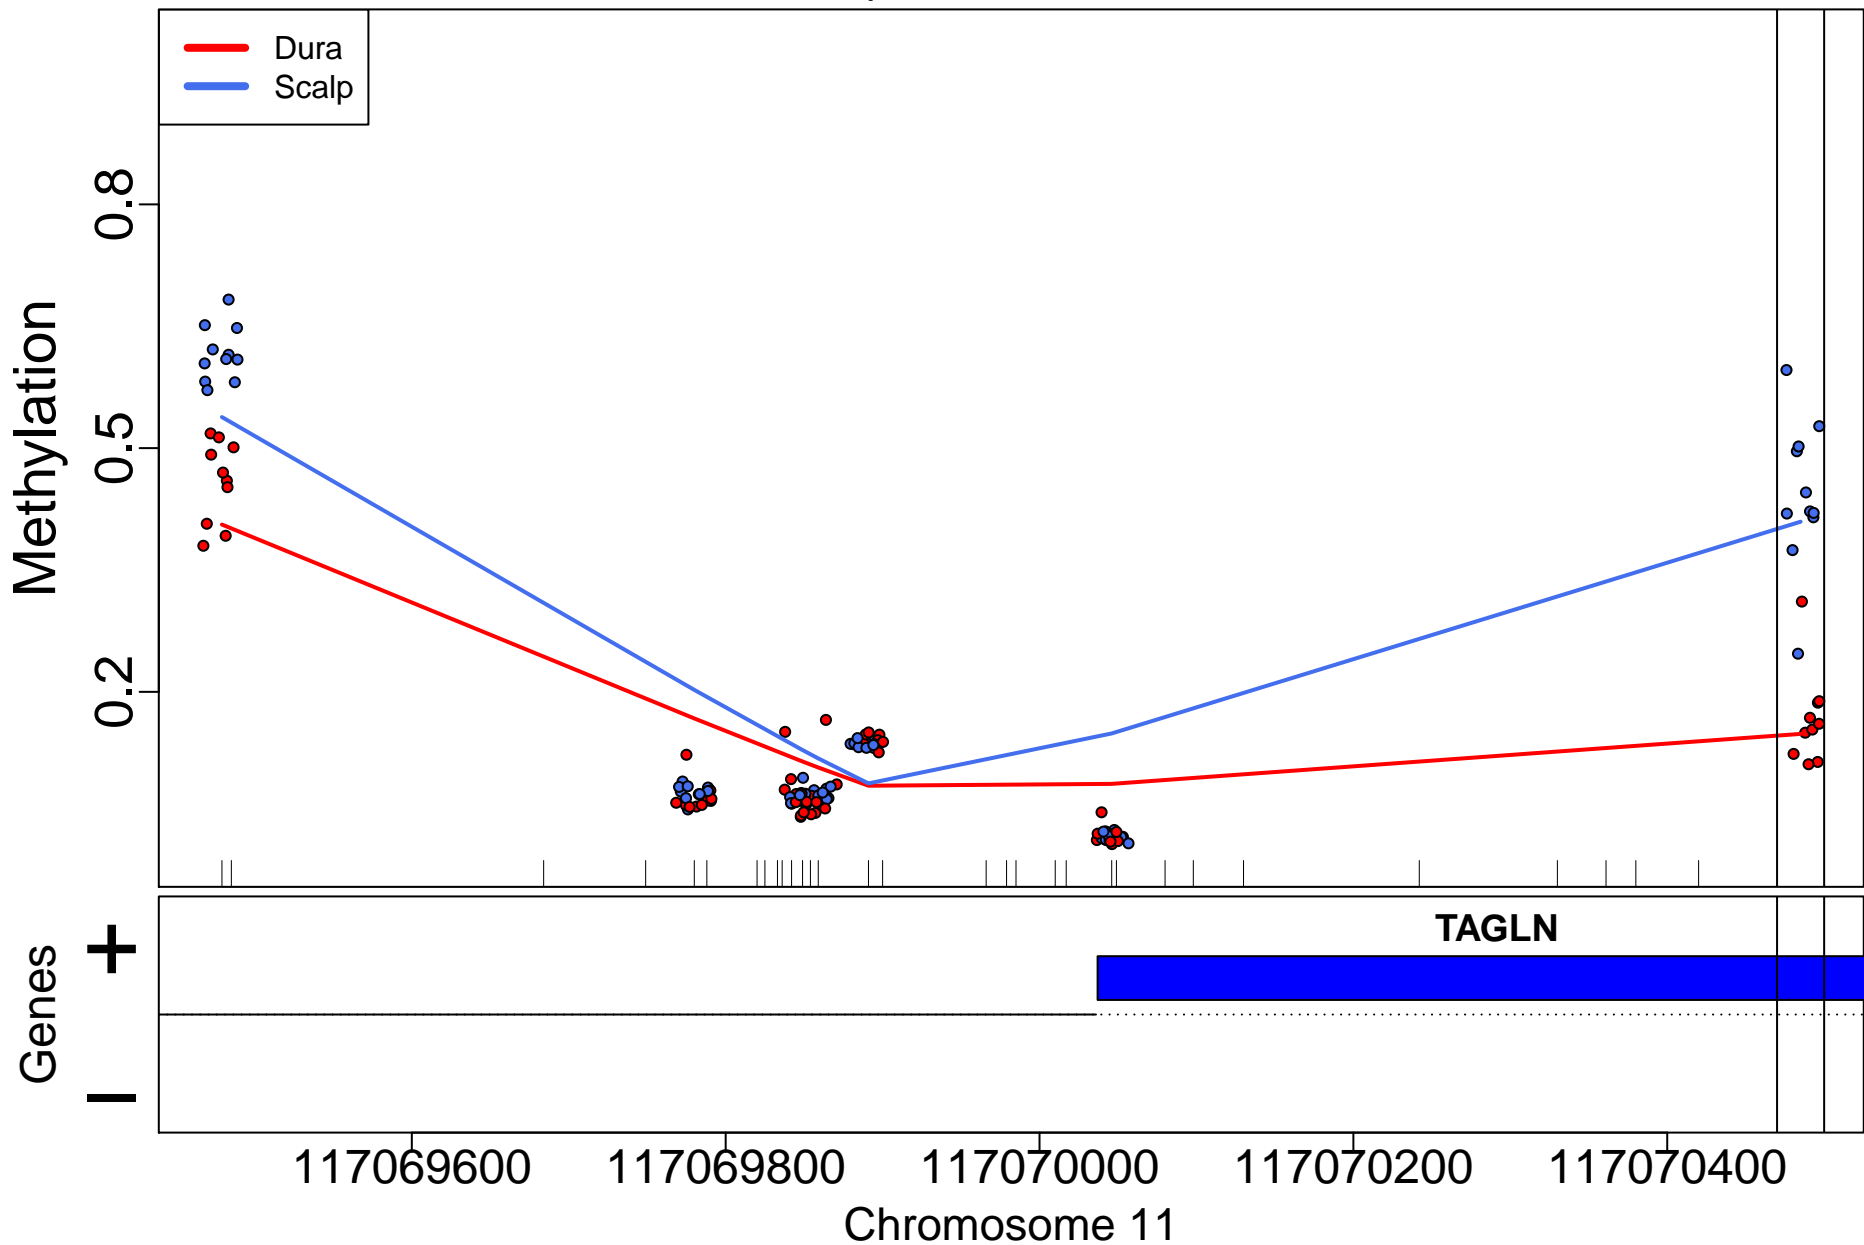

CATSPERB; 93983bp from tss:downstream

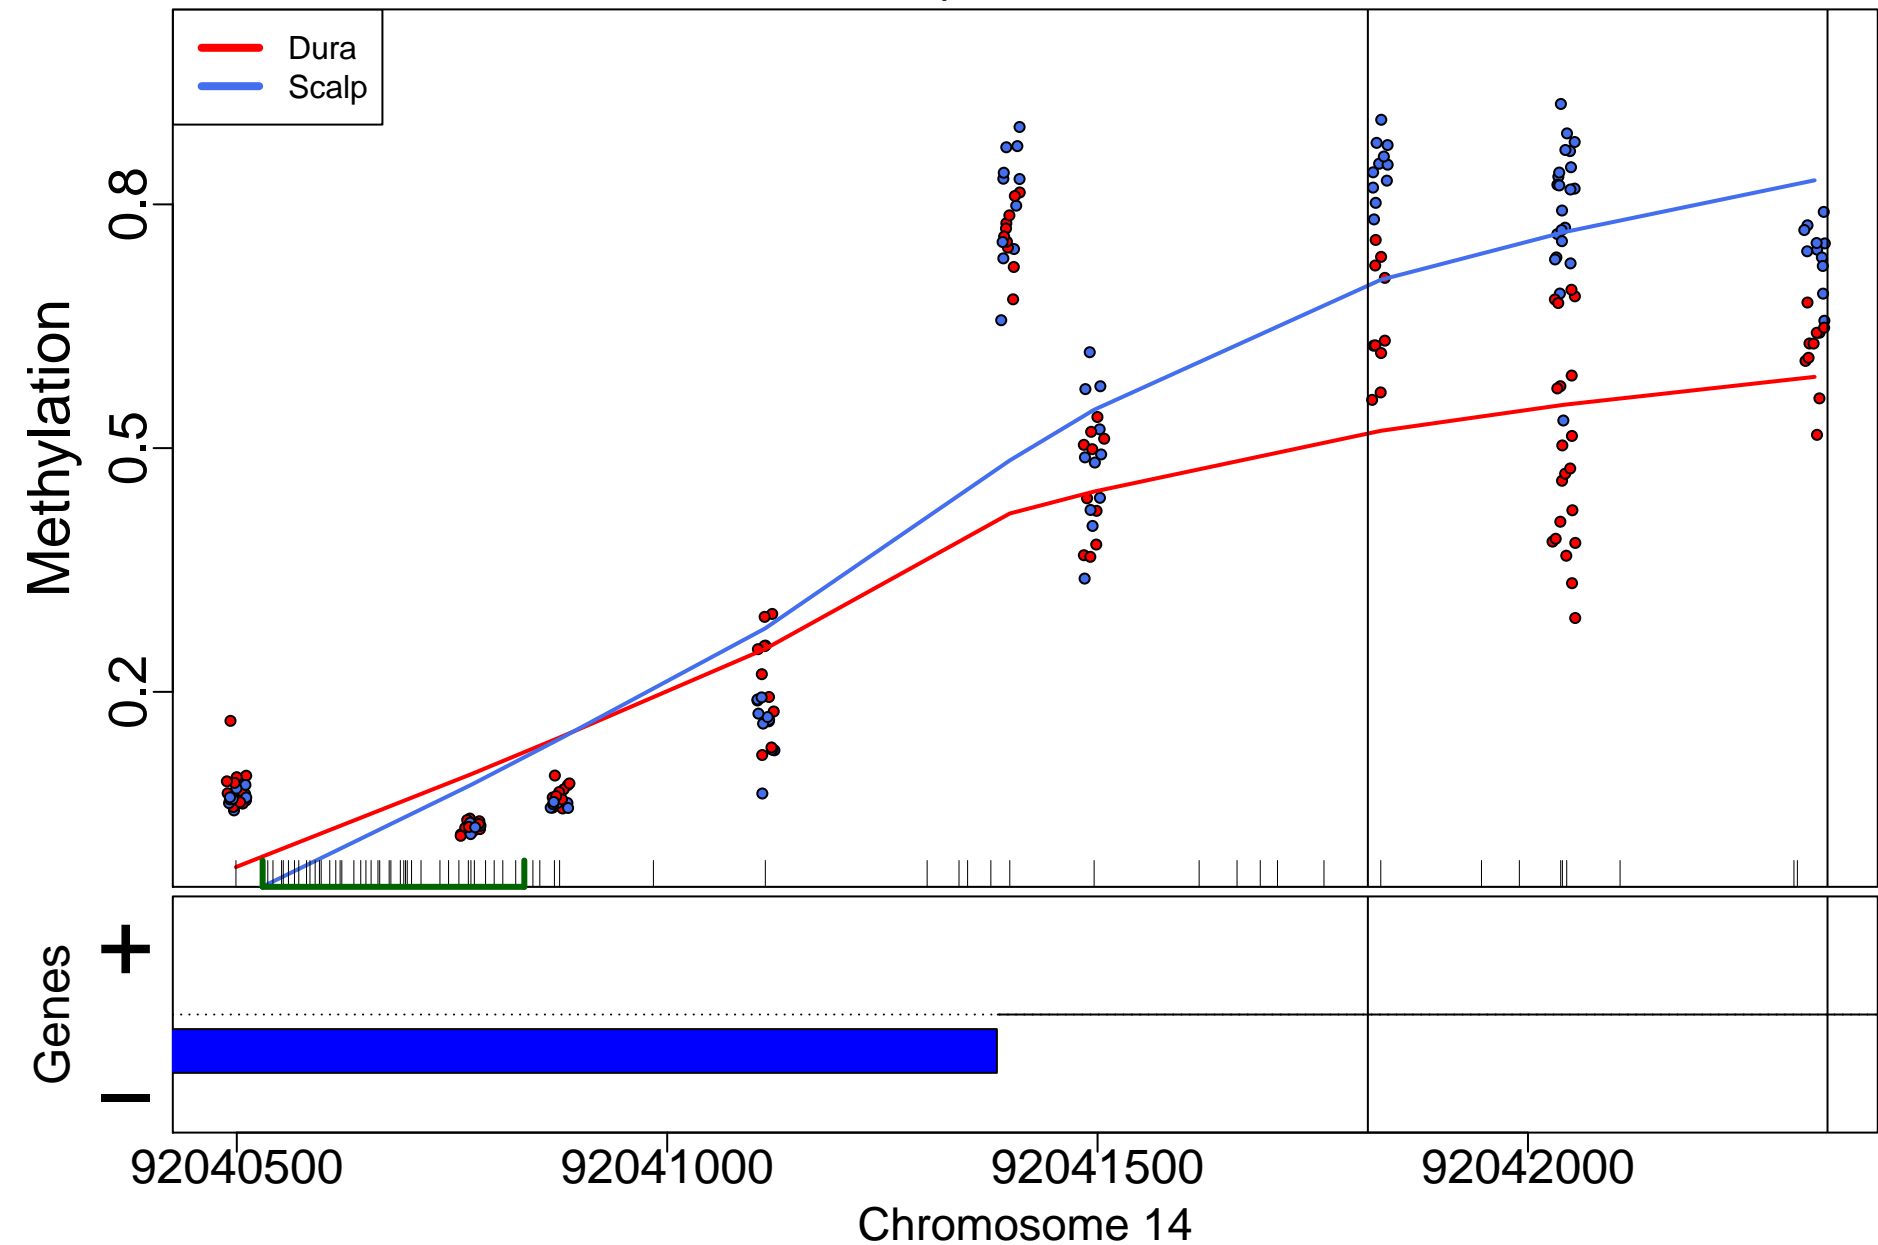

HRK; 0bp from tss:NA

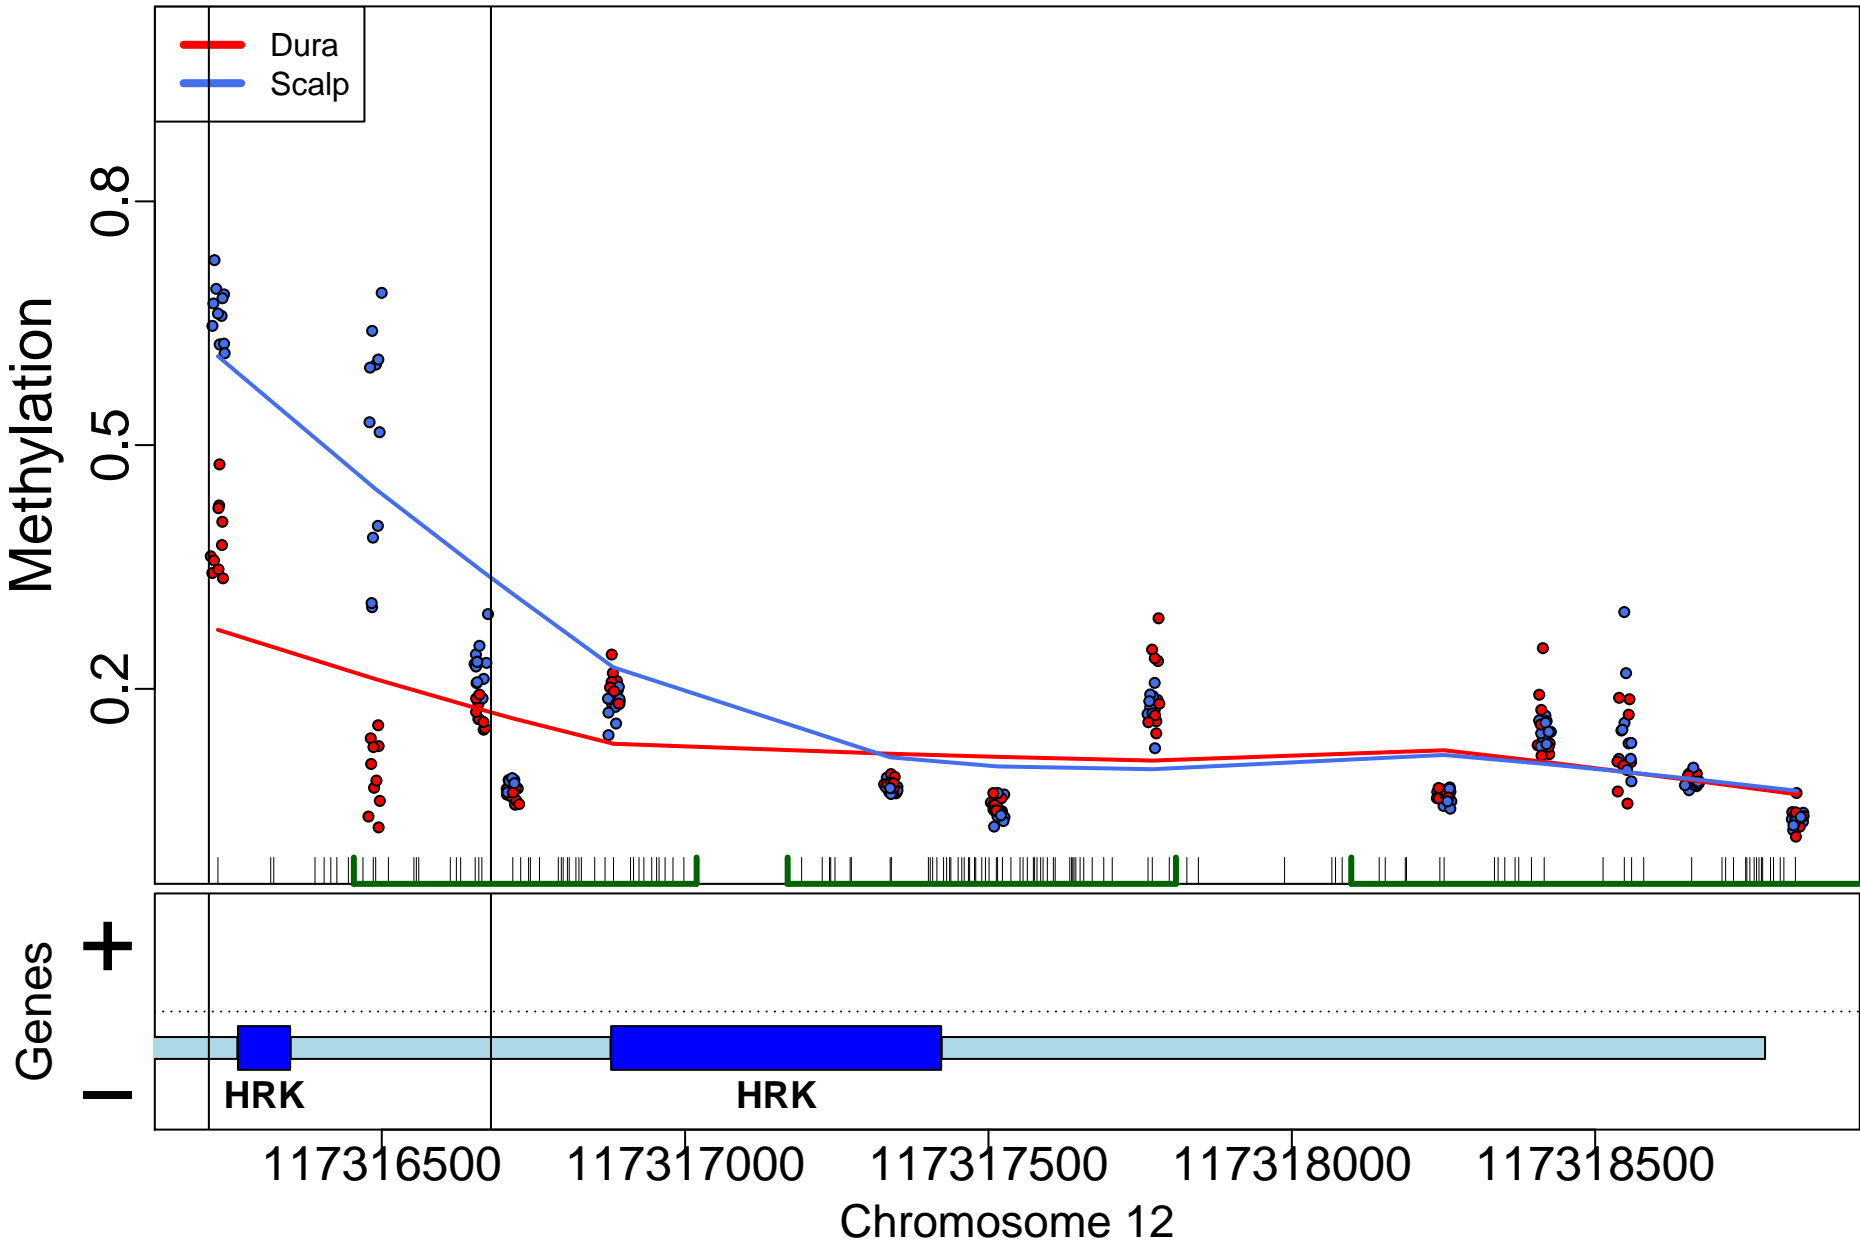

CHEK1; 153bp from tss:promoter

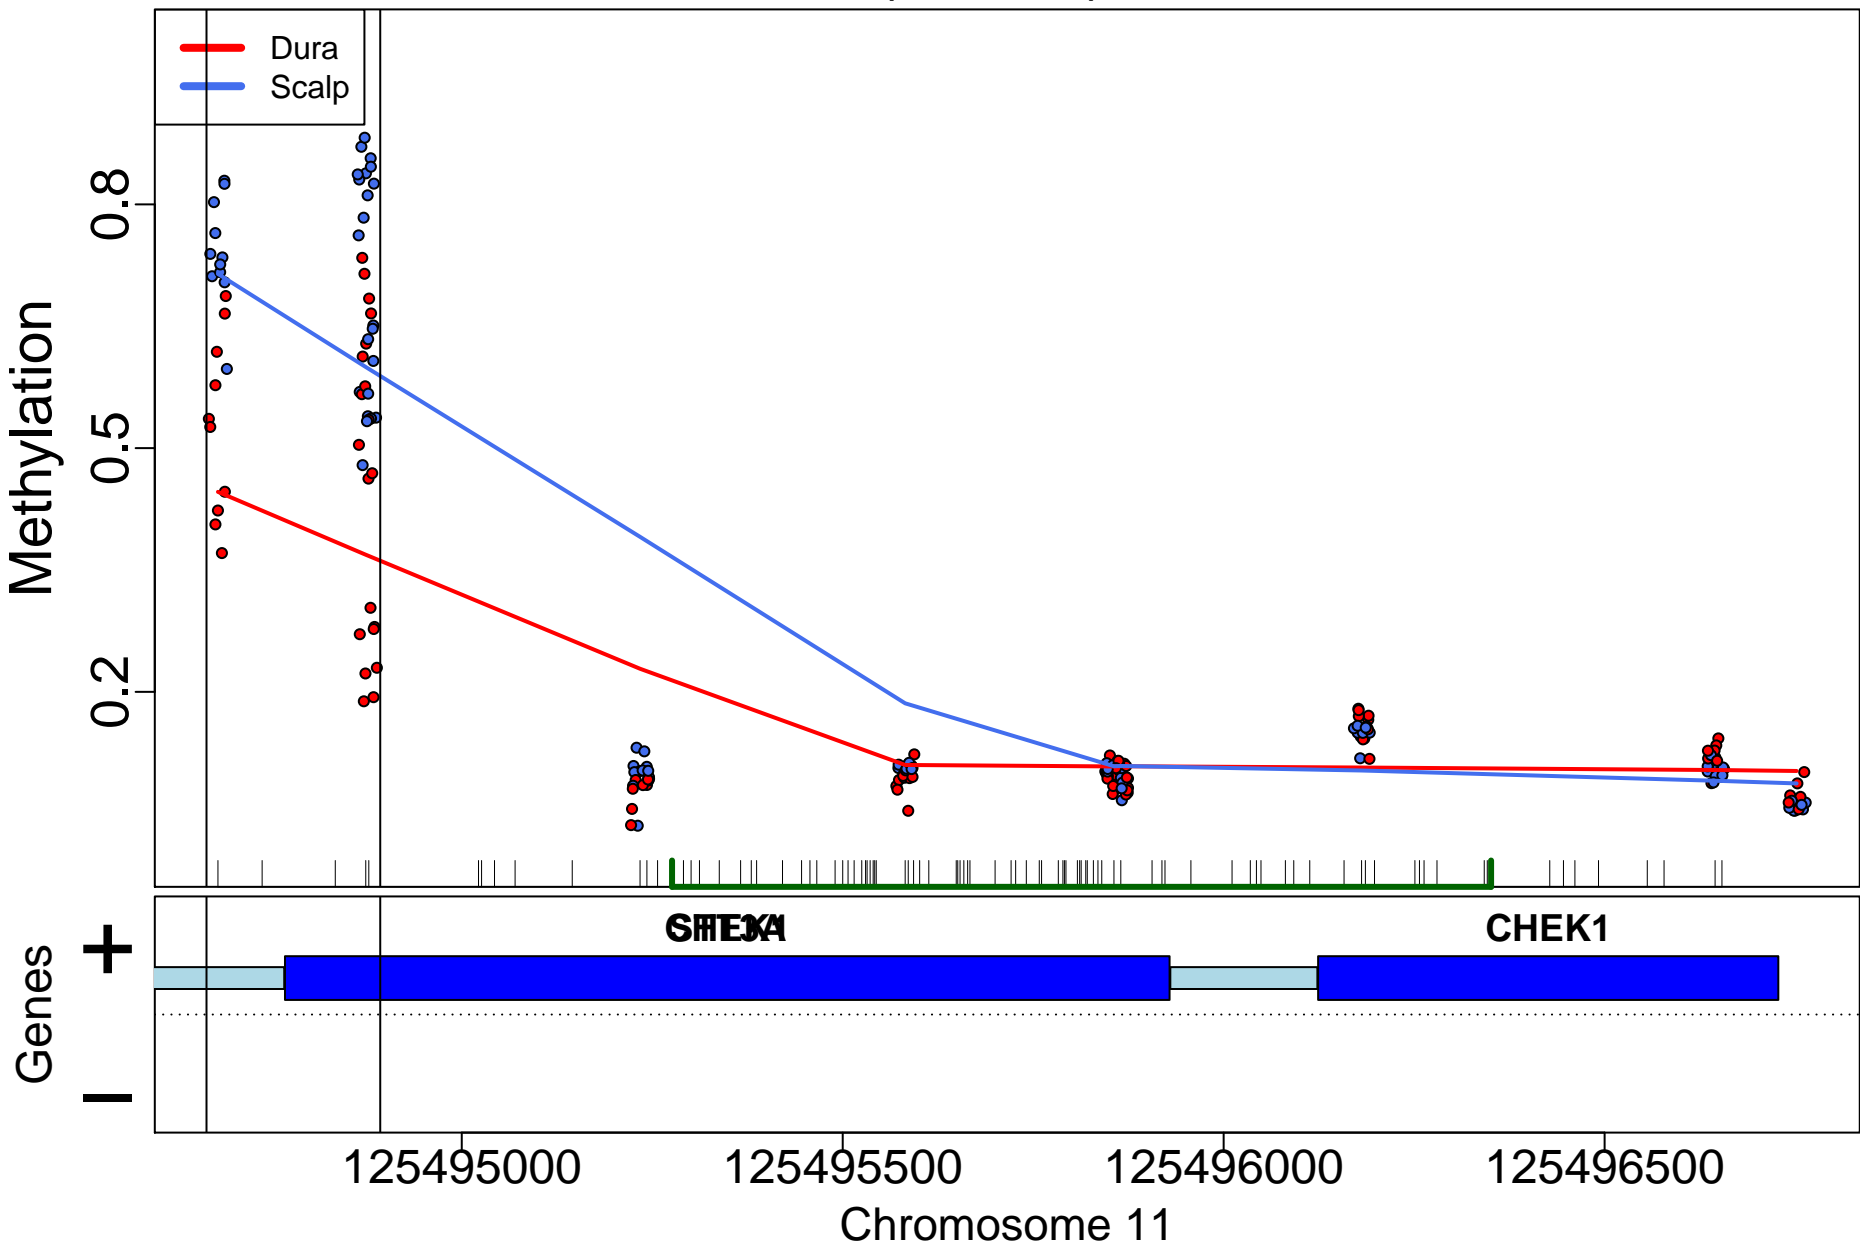

# GPD2; 503bp from tss:promoter

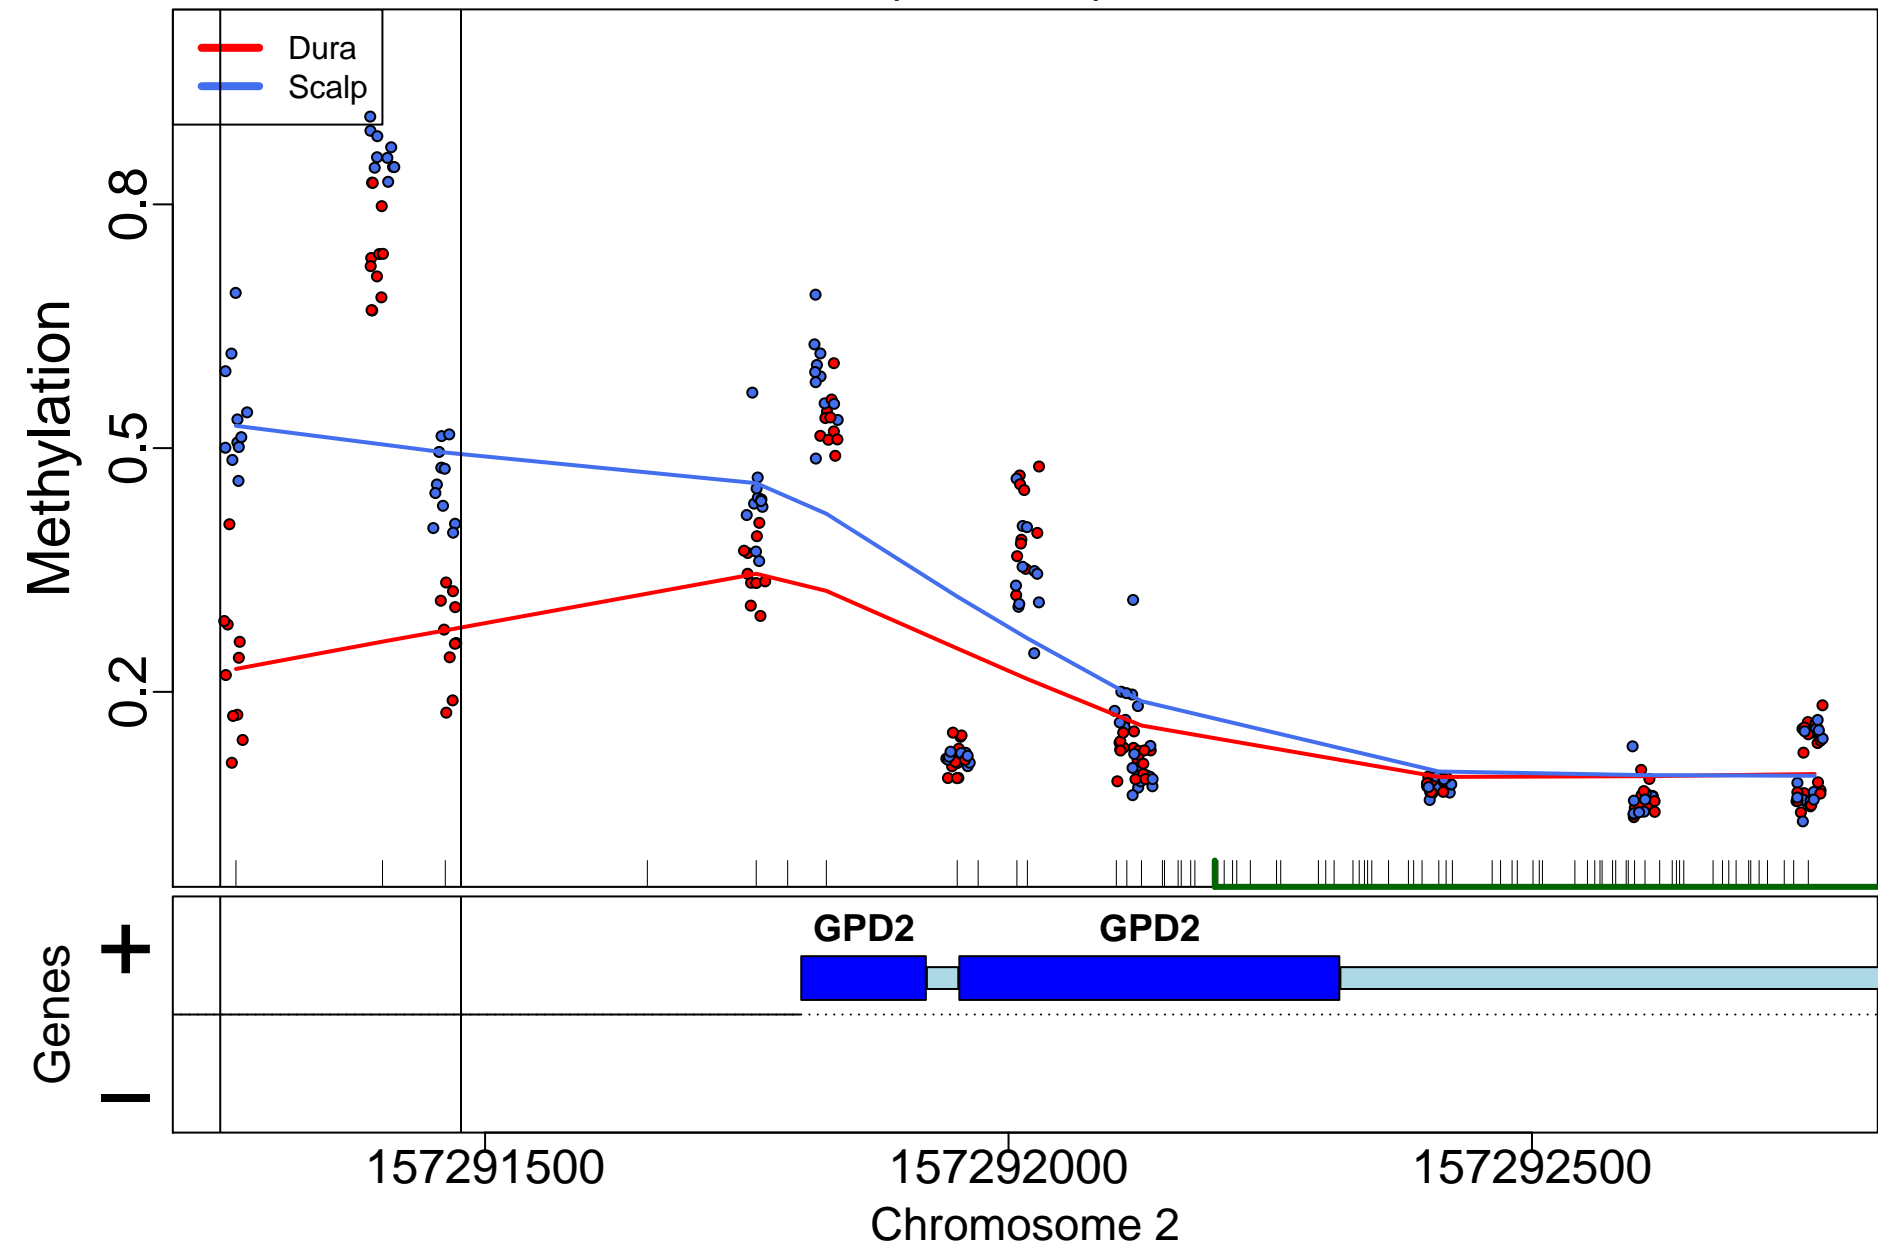

BANK1; 0bp from tss:overlaps 5'

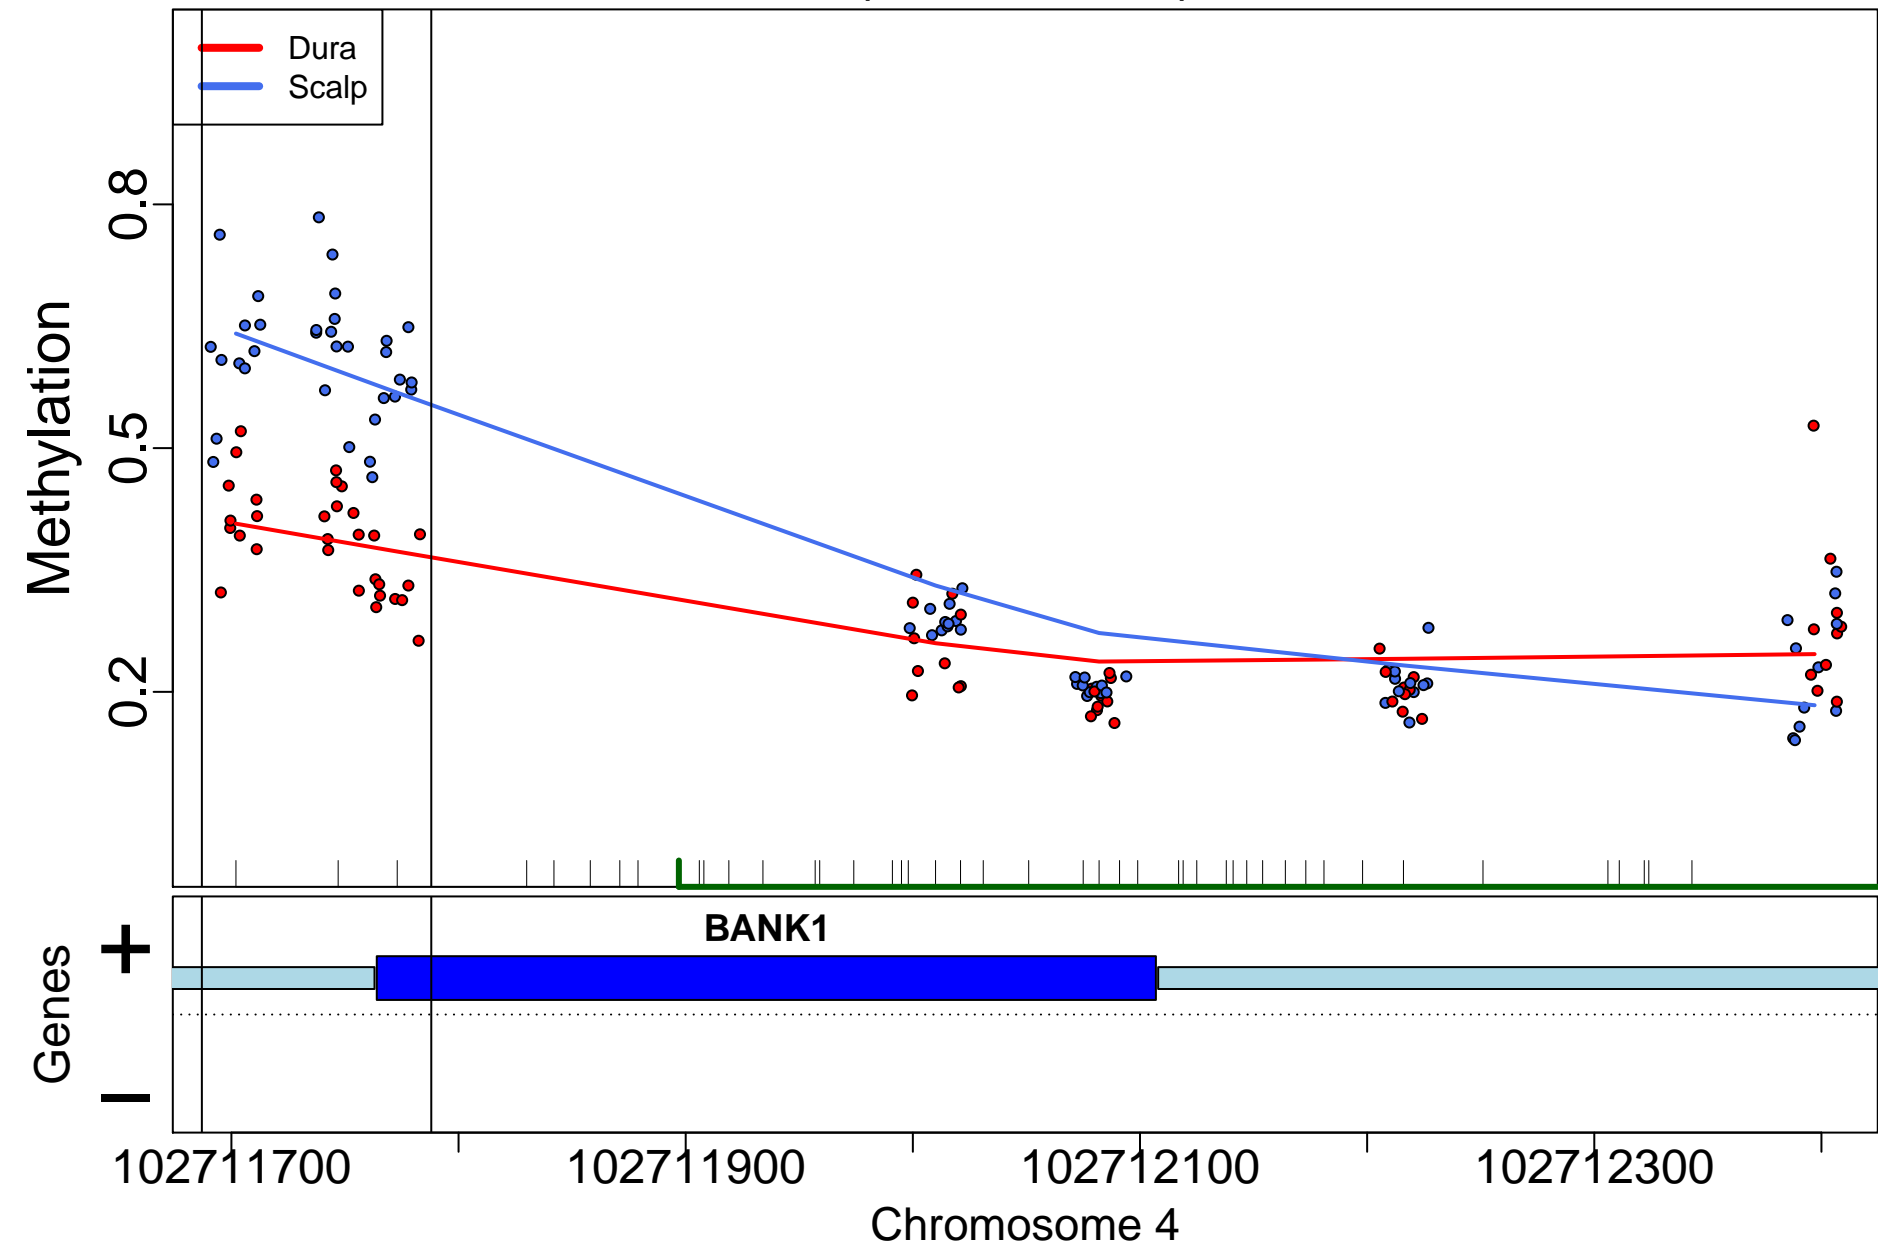

LINC00469; 74141bp from tss:upstream

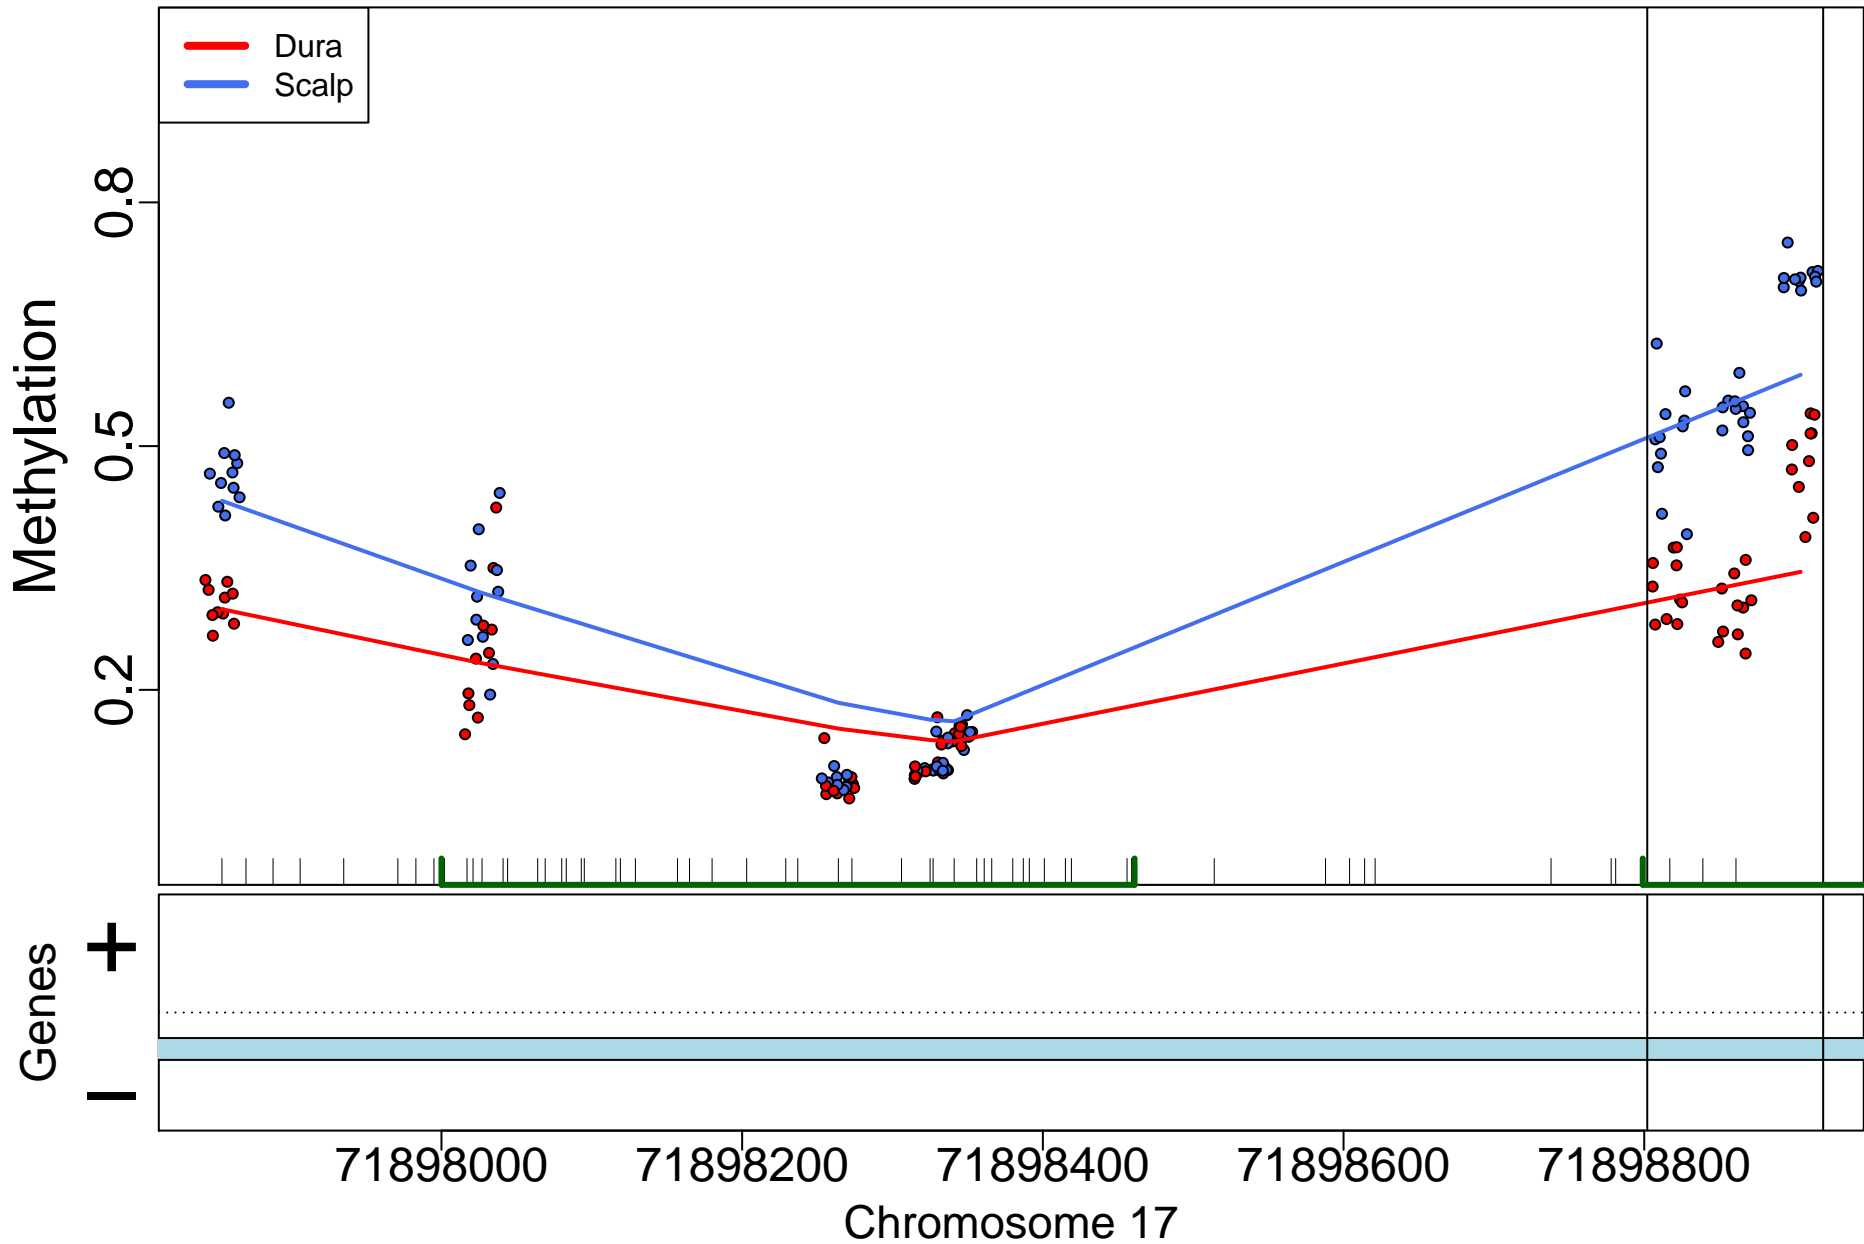

LONRF2; 282bp from tss:promoter

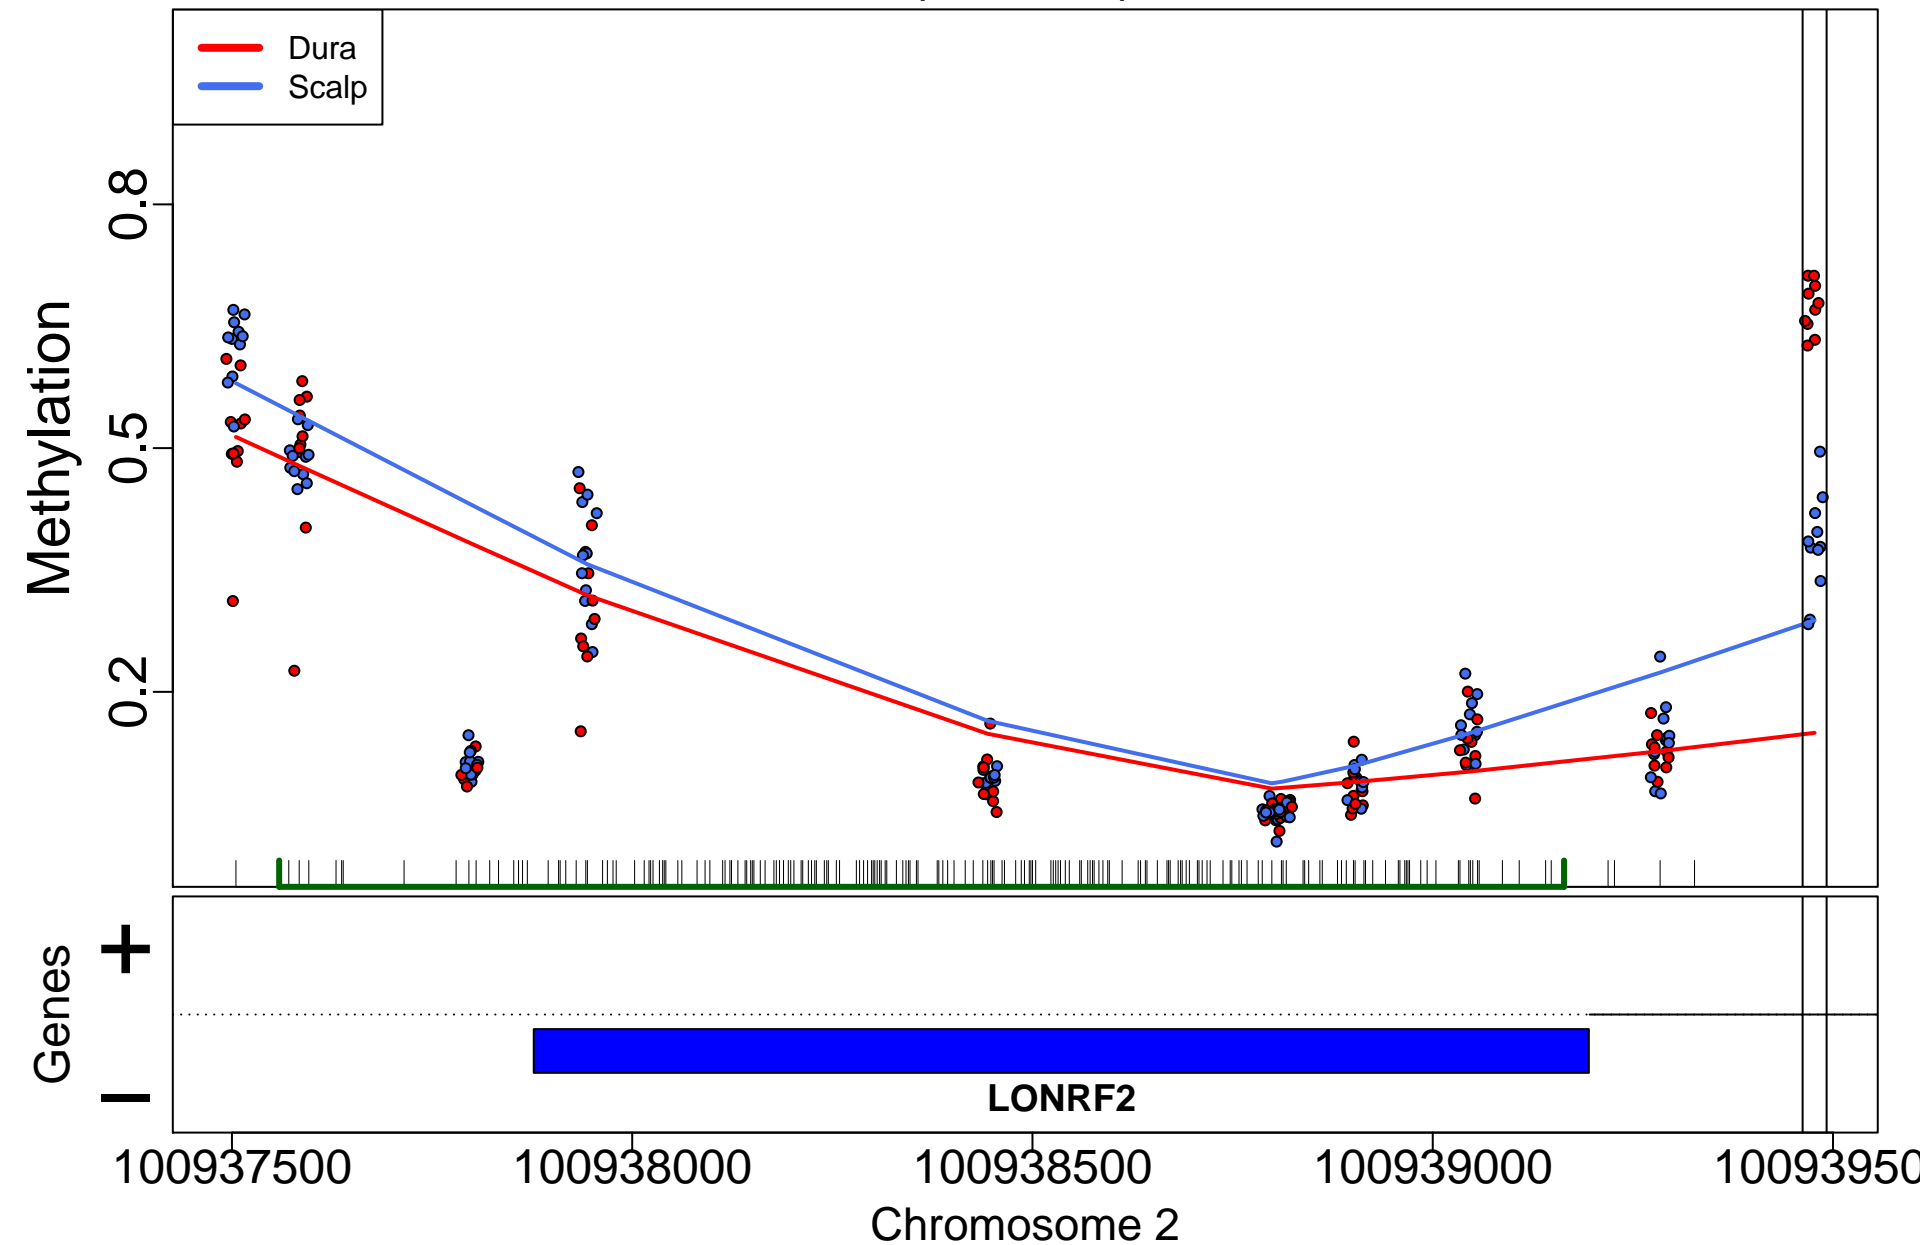



MBP; 932bp from tss:promoter

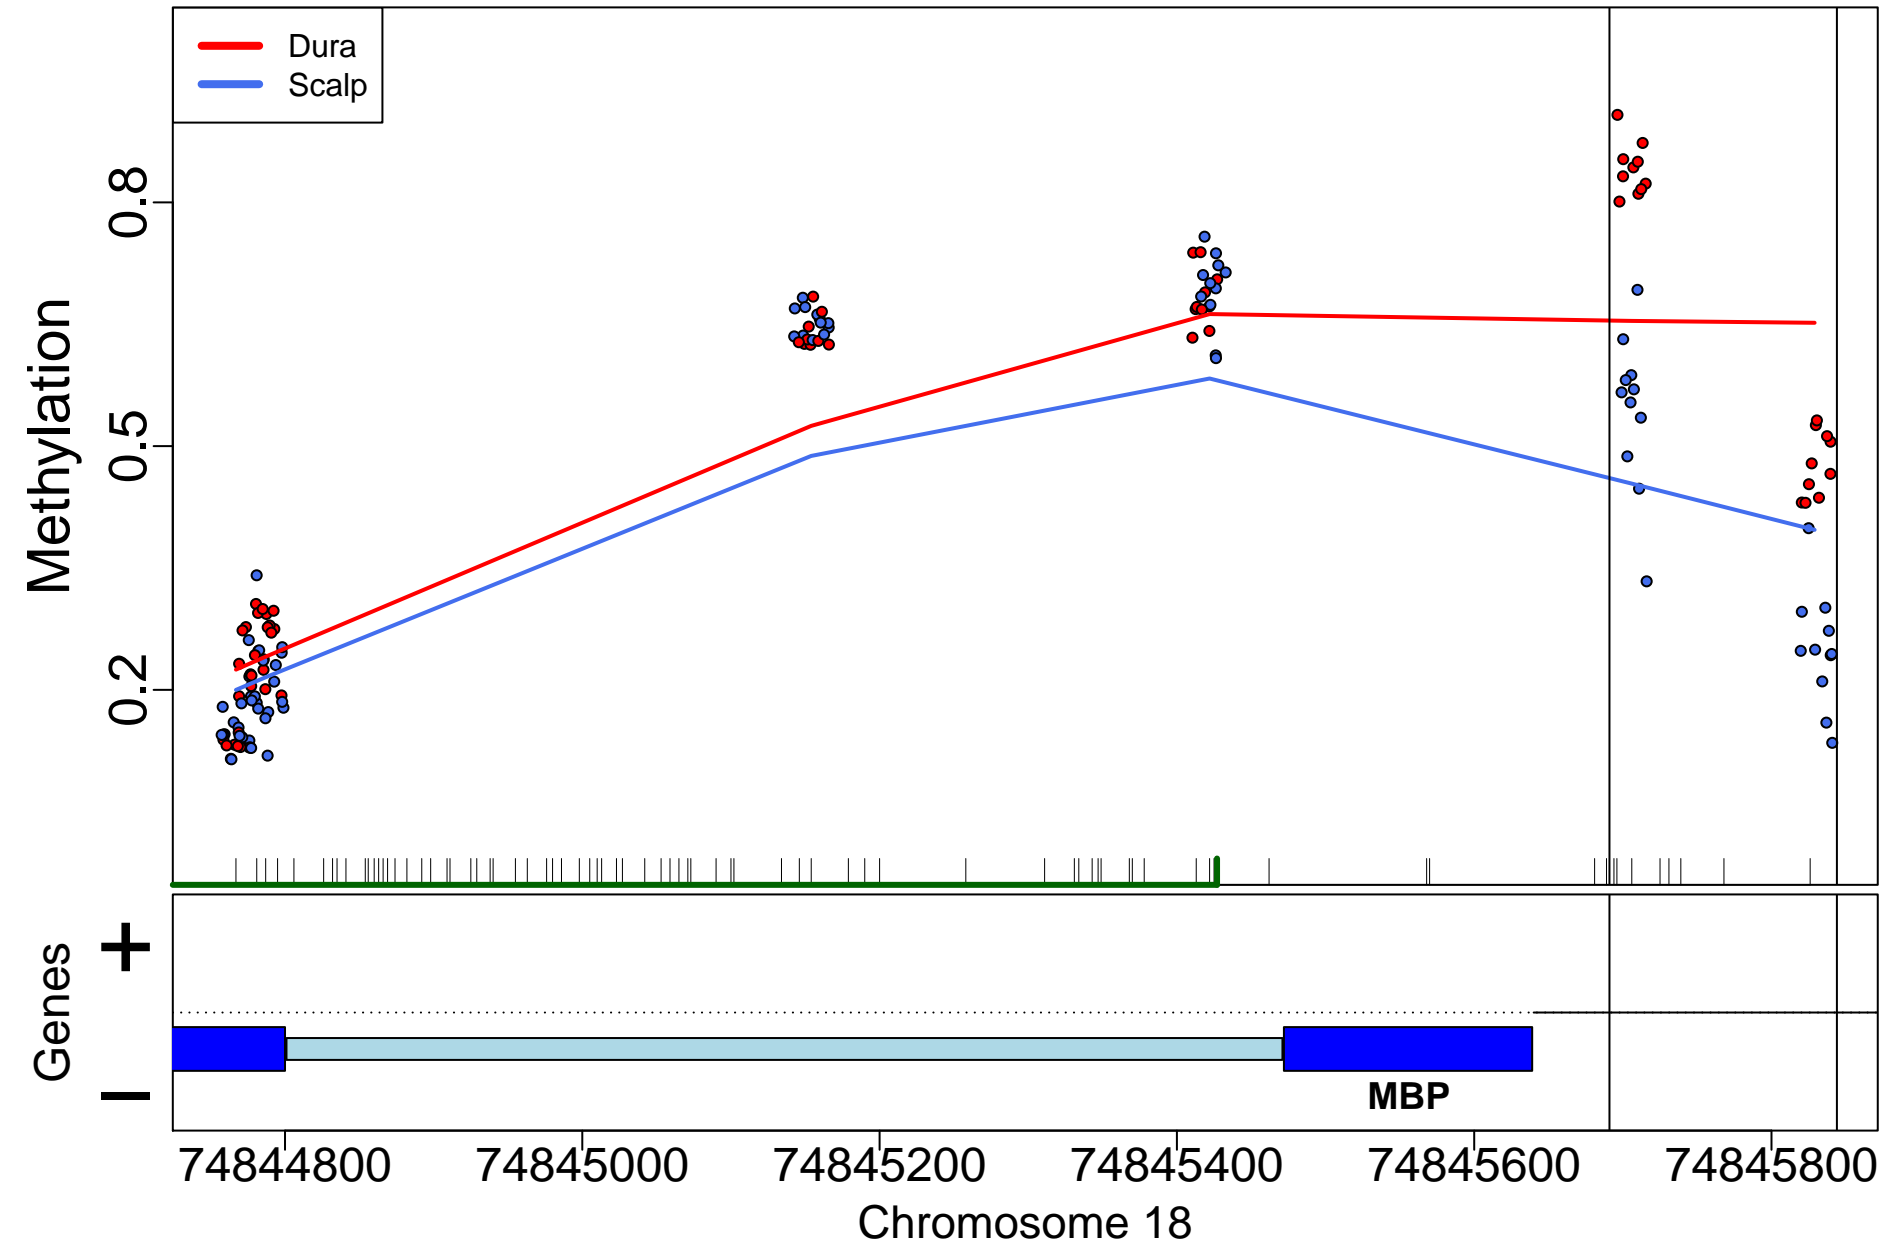

# CCR6; 262bp from tss:inside intron

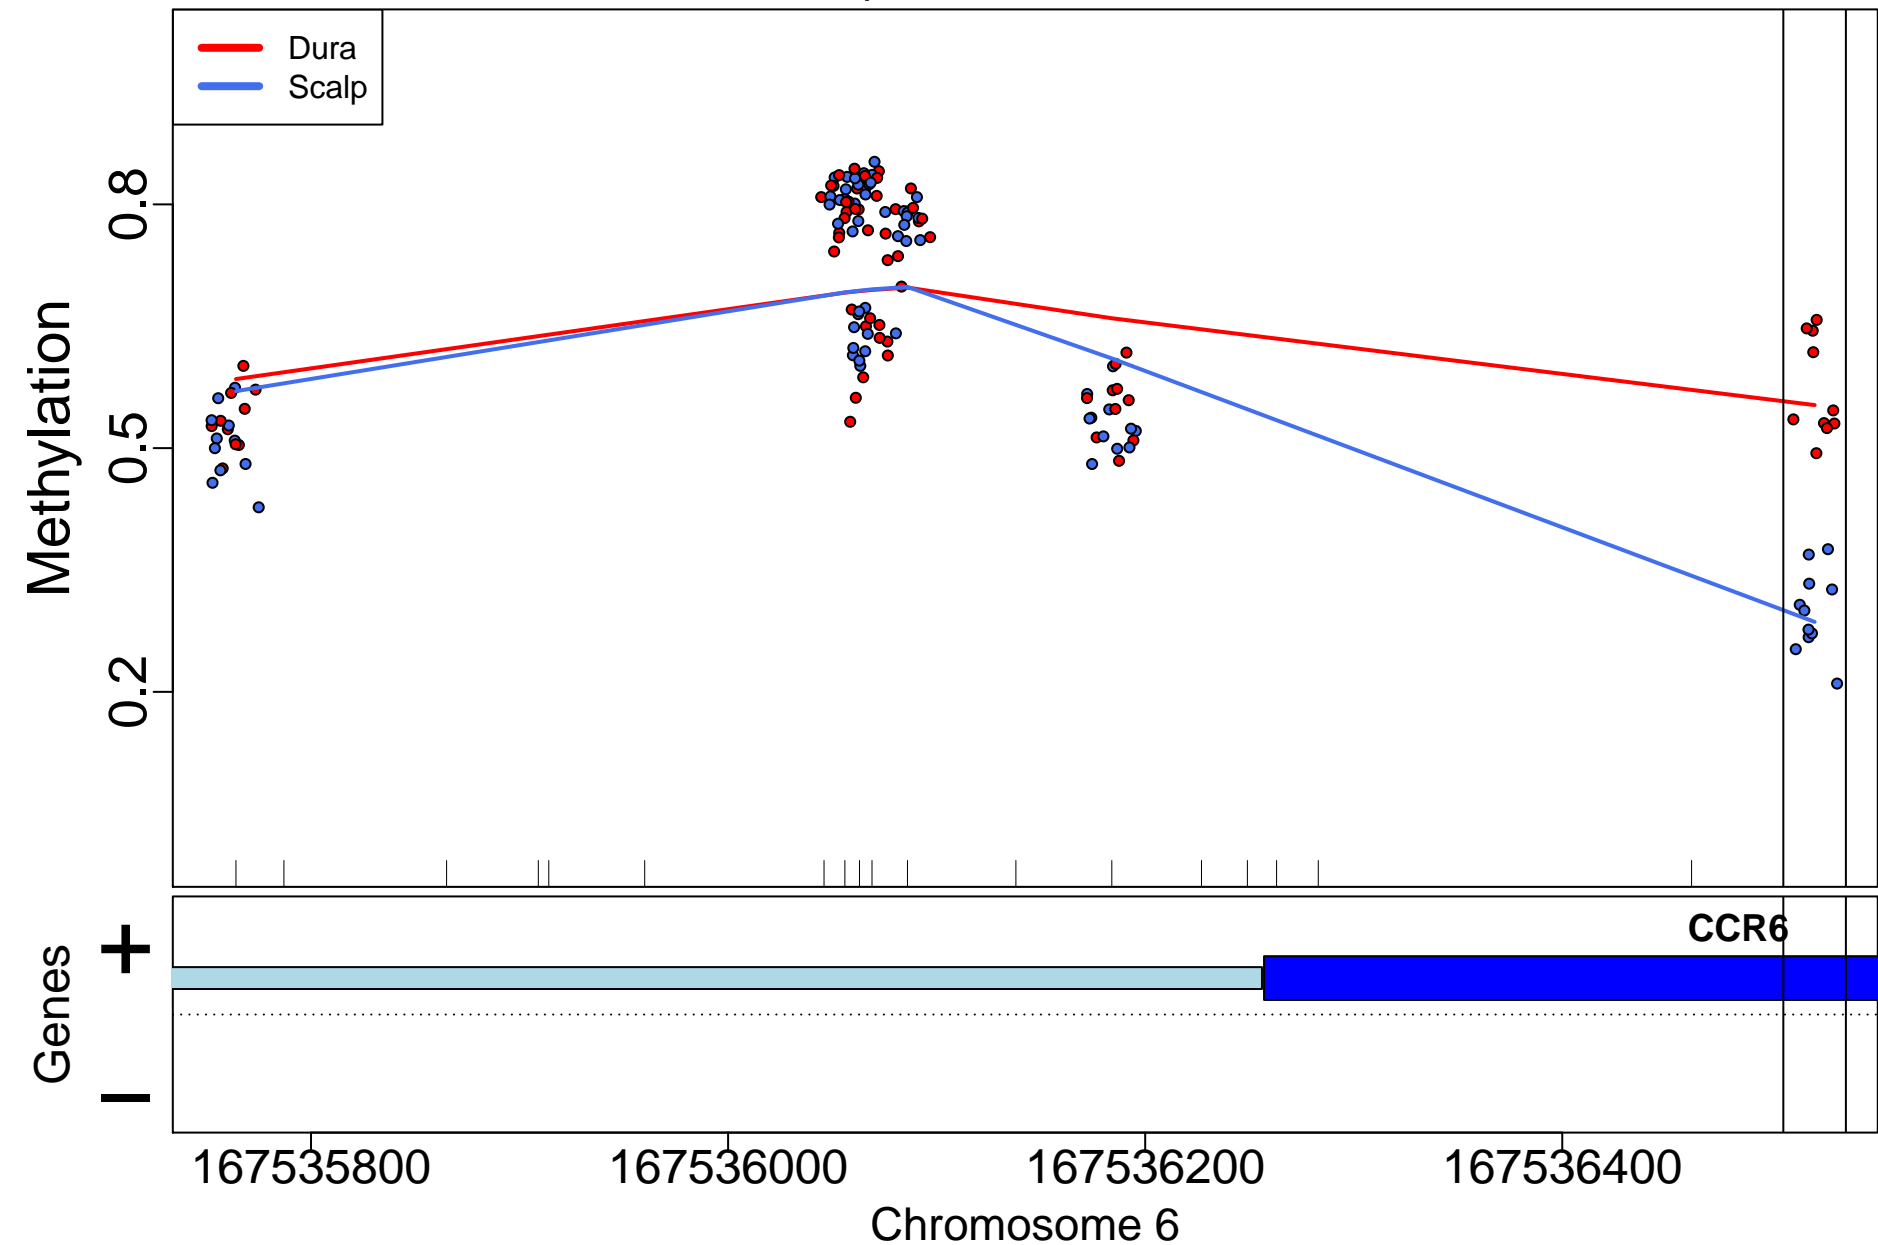

COMP; 0bp from tss:overlaps 5'

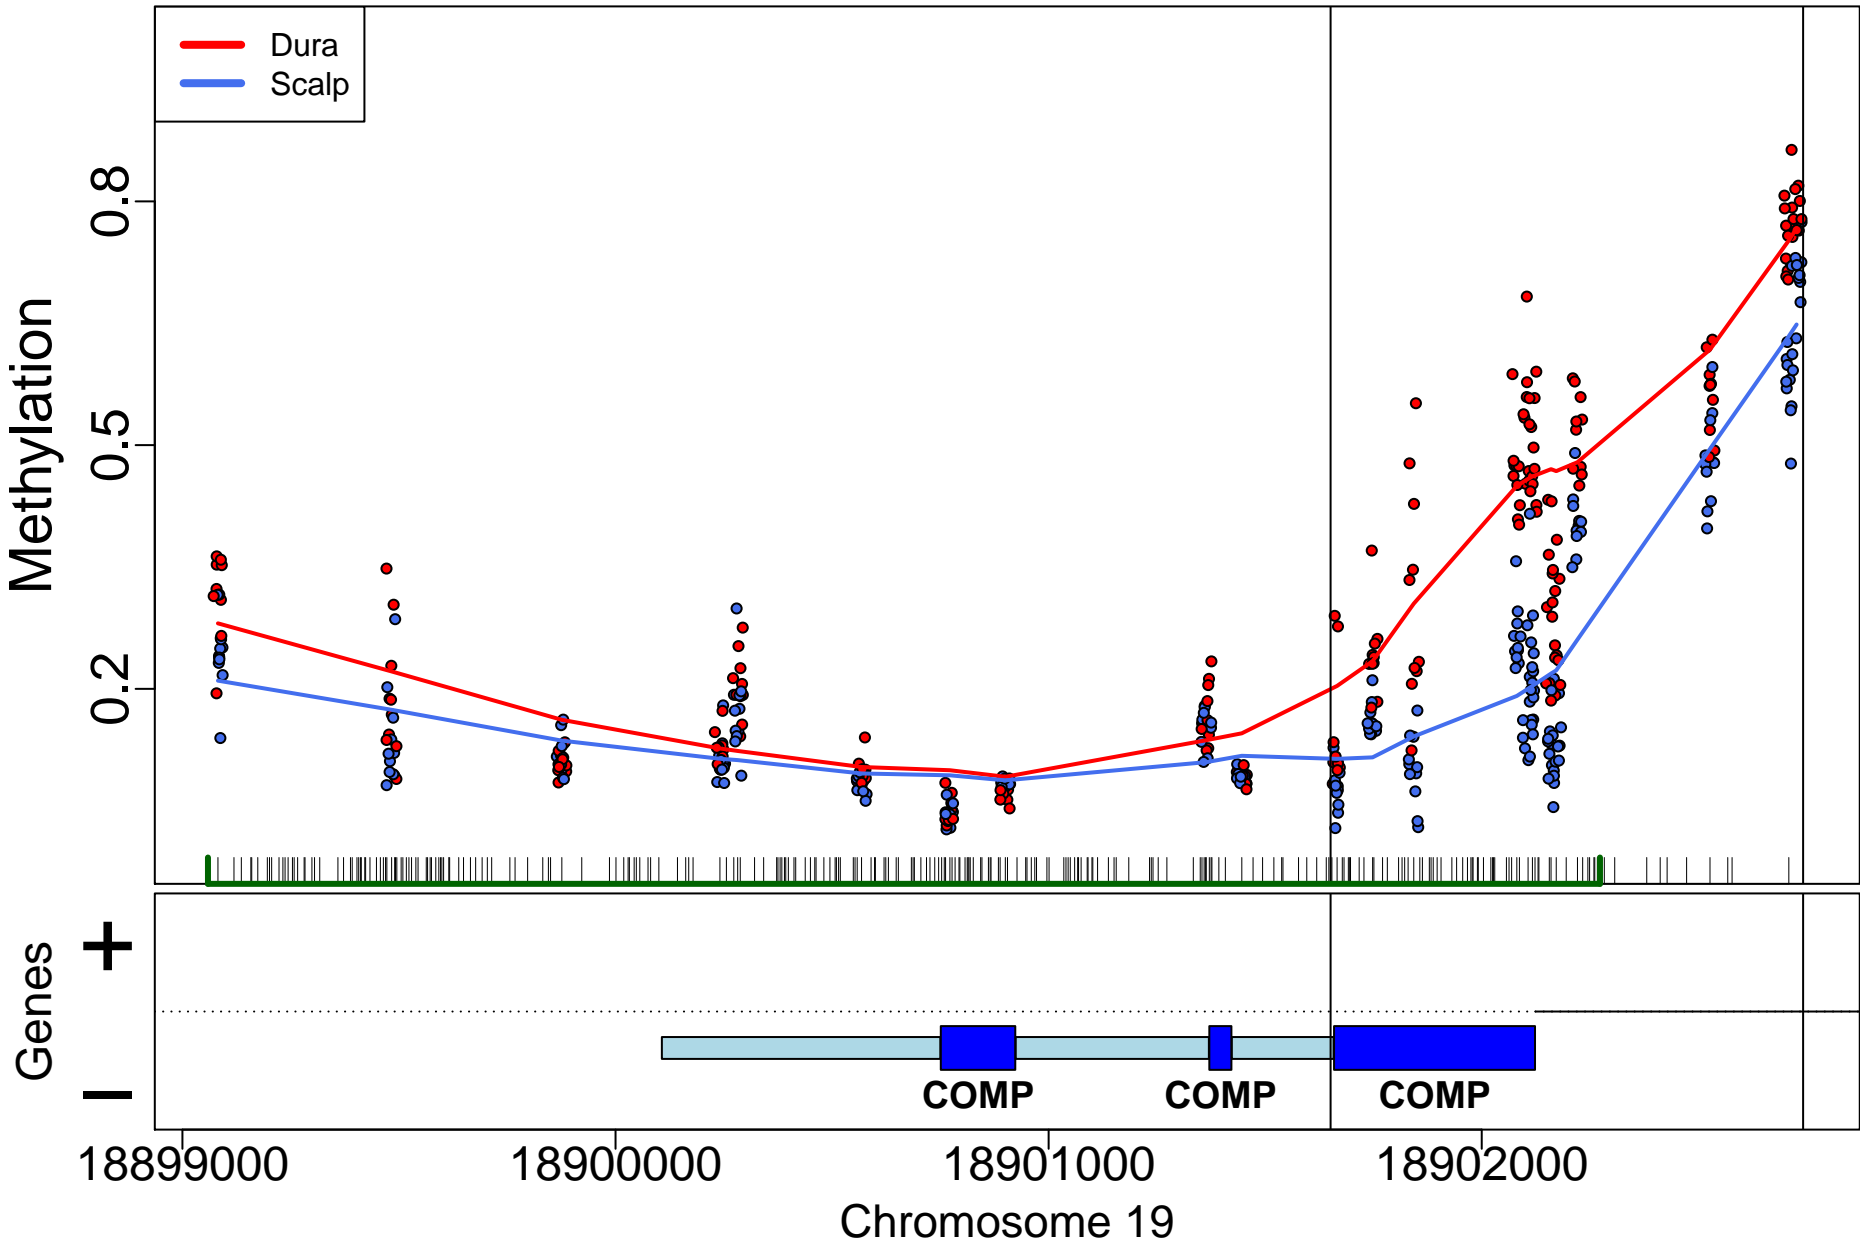

PTGER3; 1391bp from tss:inside intron

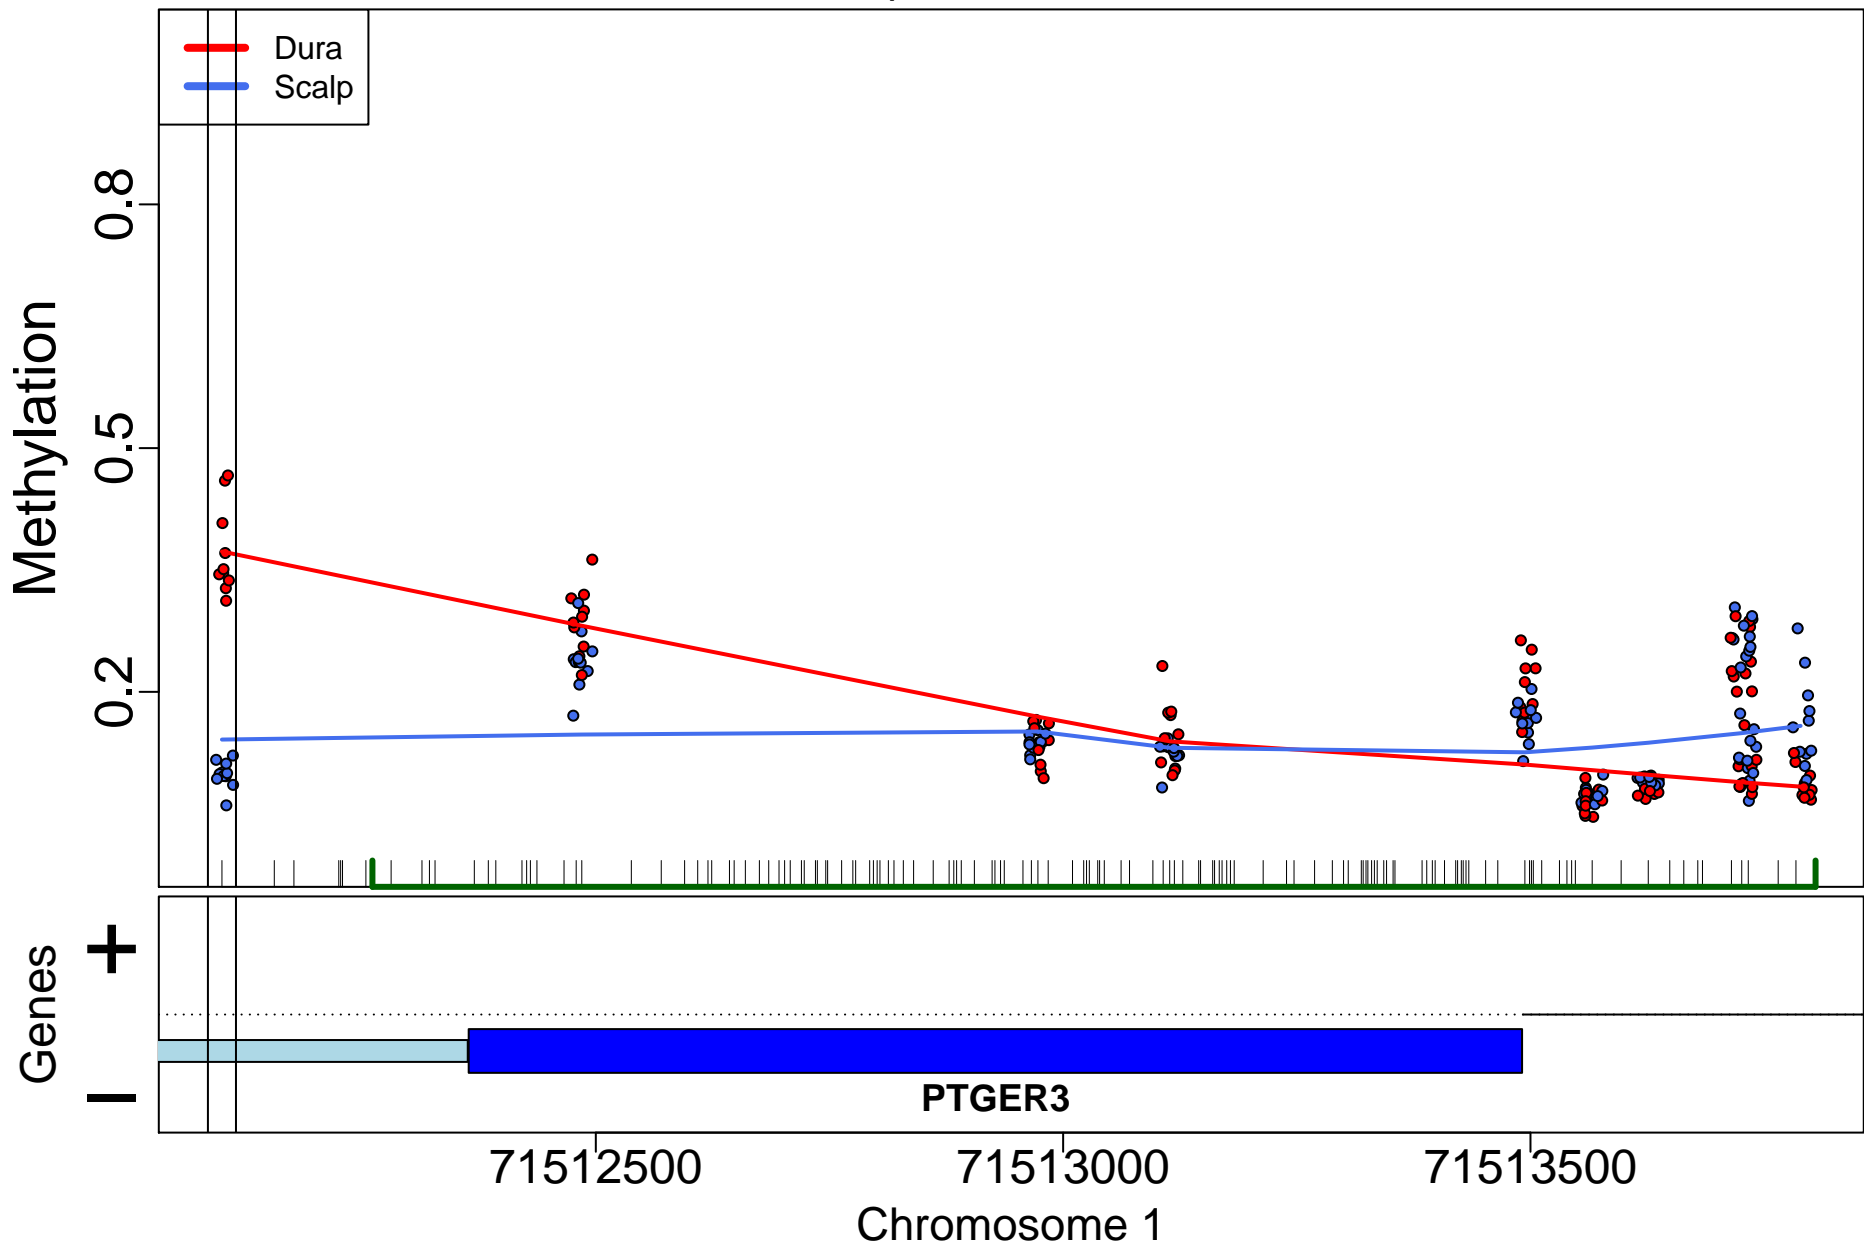

# HECW1; 610bp from tss:inside exon

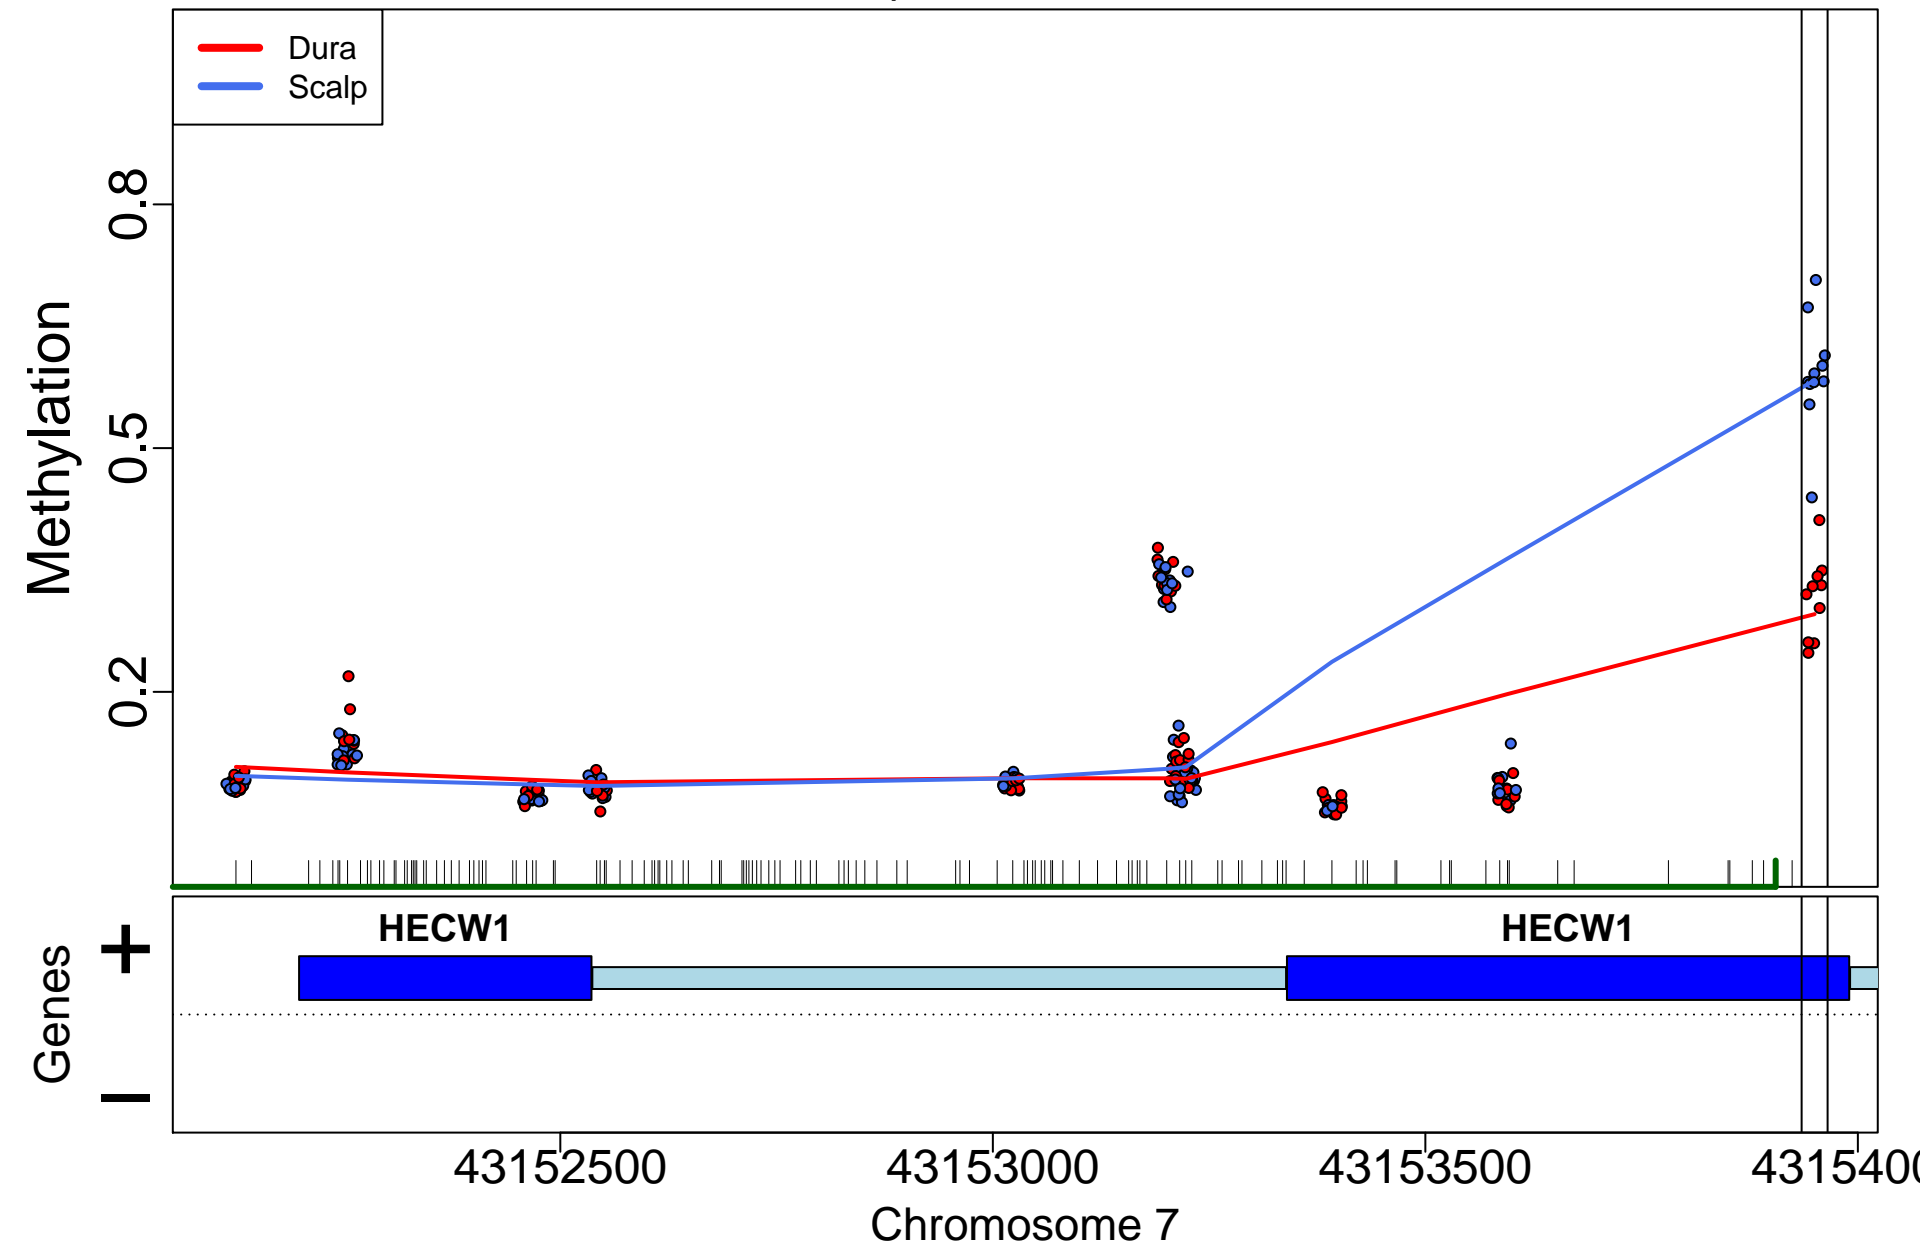

# GMPR; 988bp from tss:inside intron

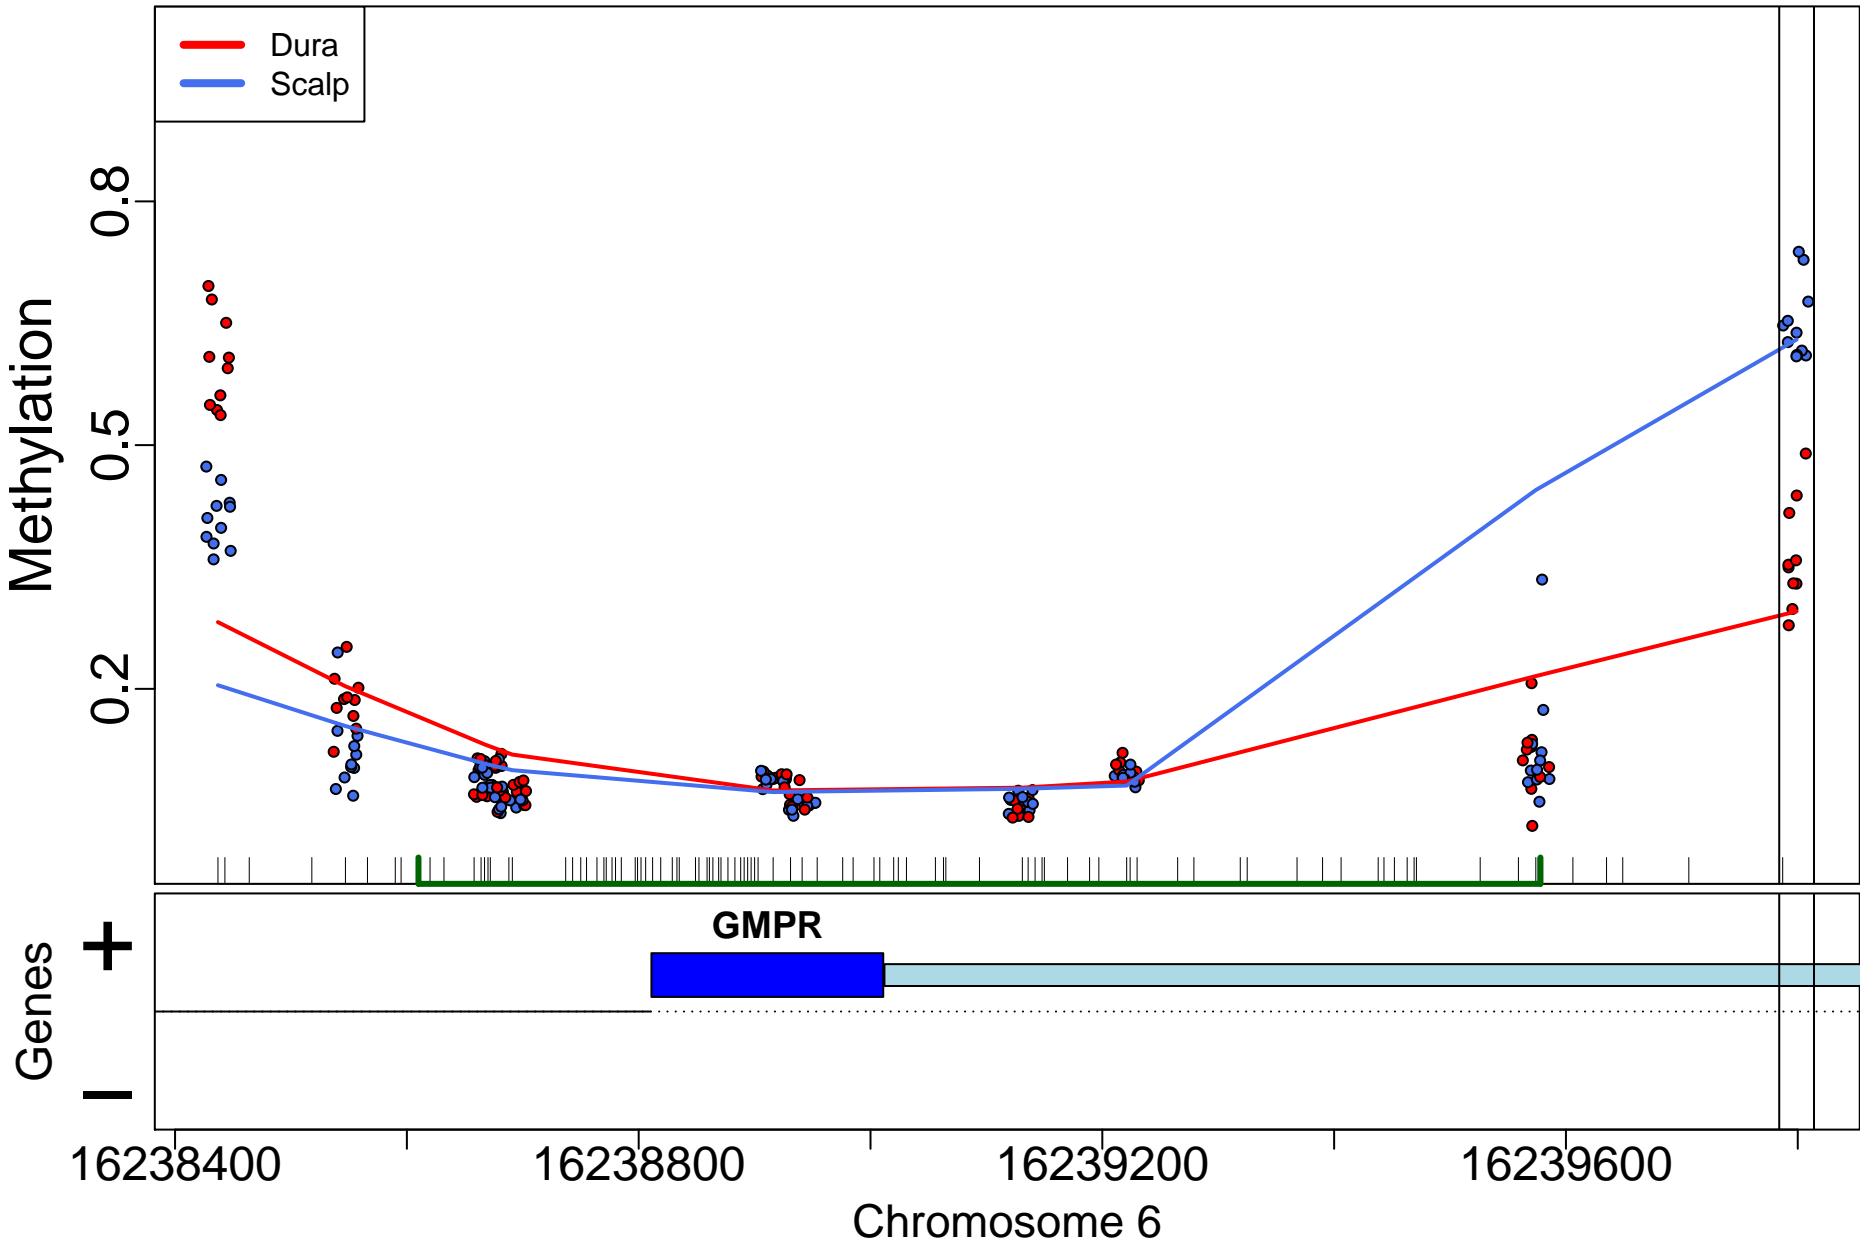

TNXB; 8368bp from tss:inside intron

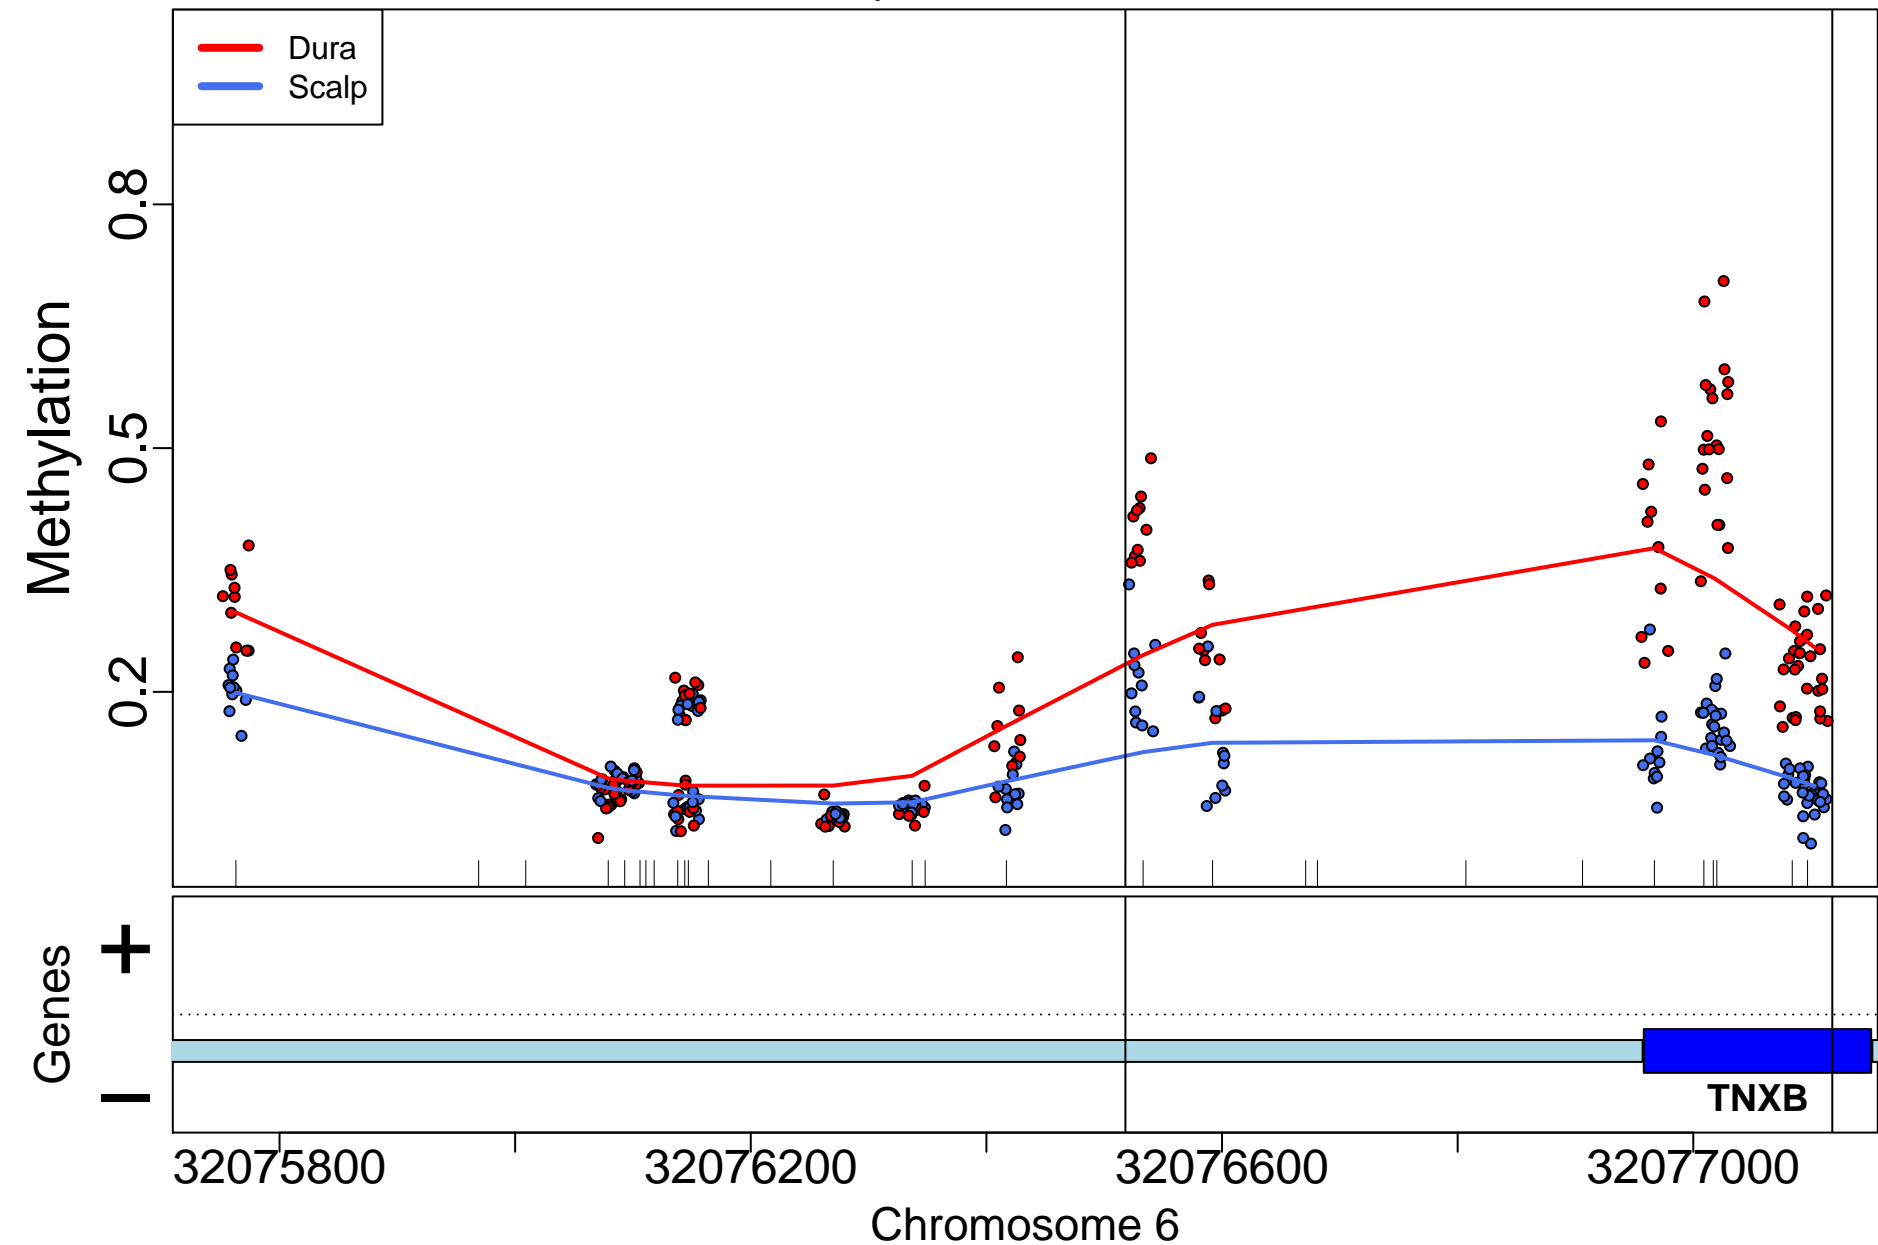

# KIF5B; 493bp from tss:promoter

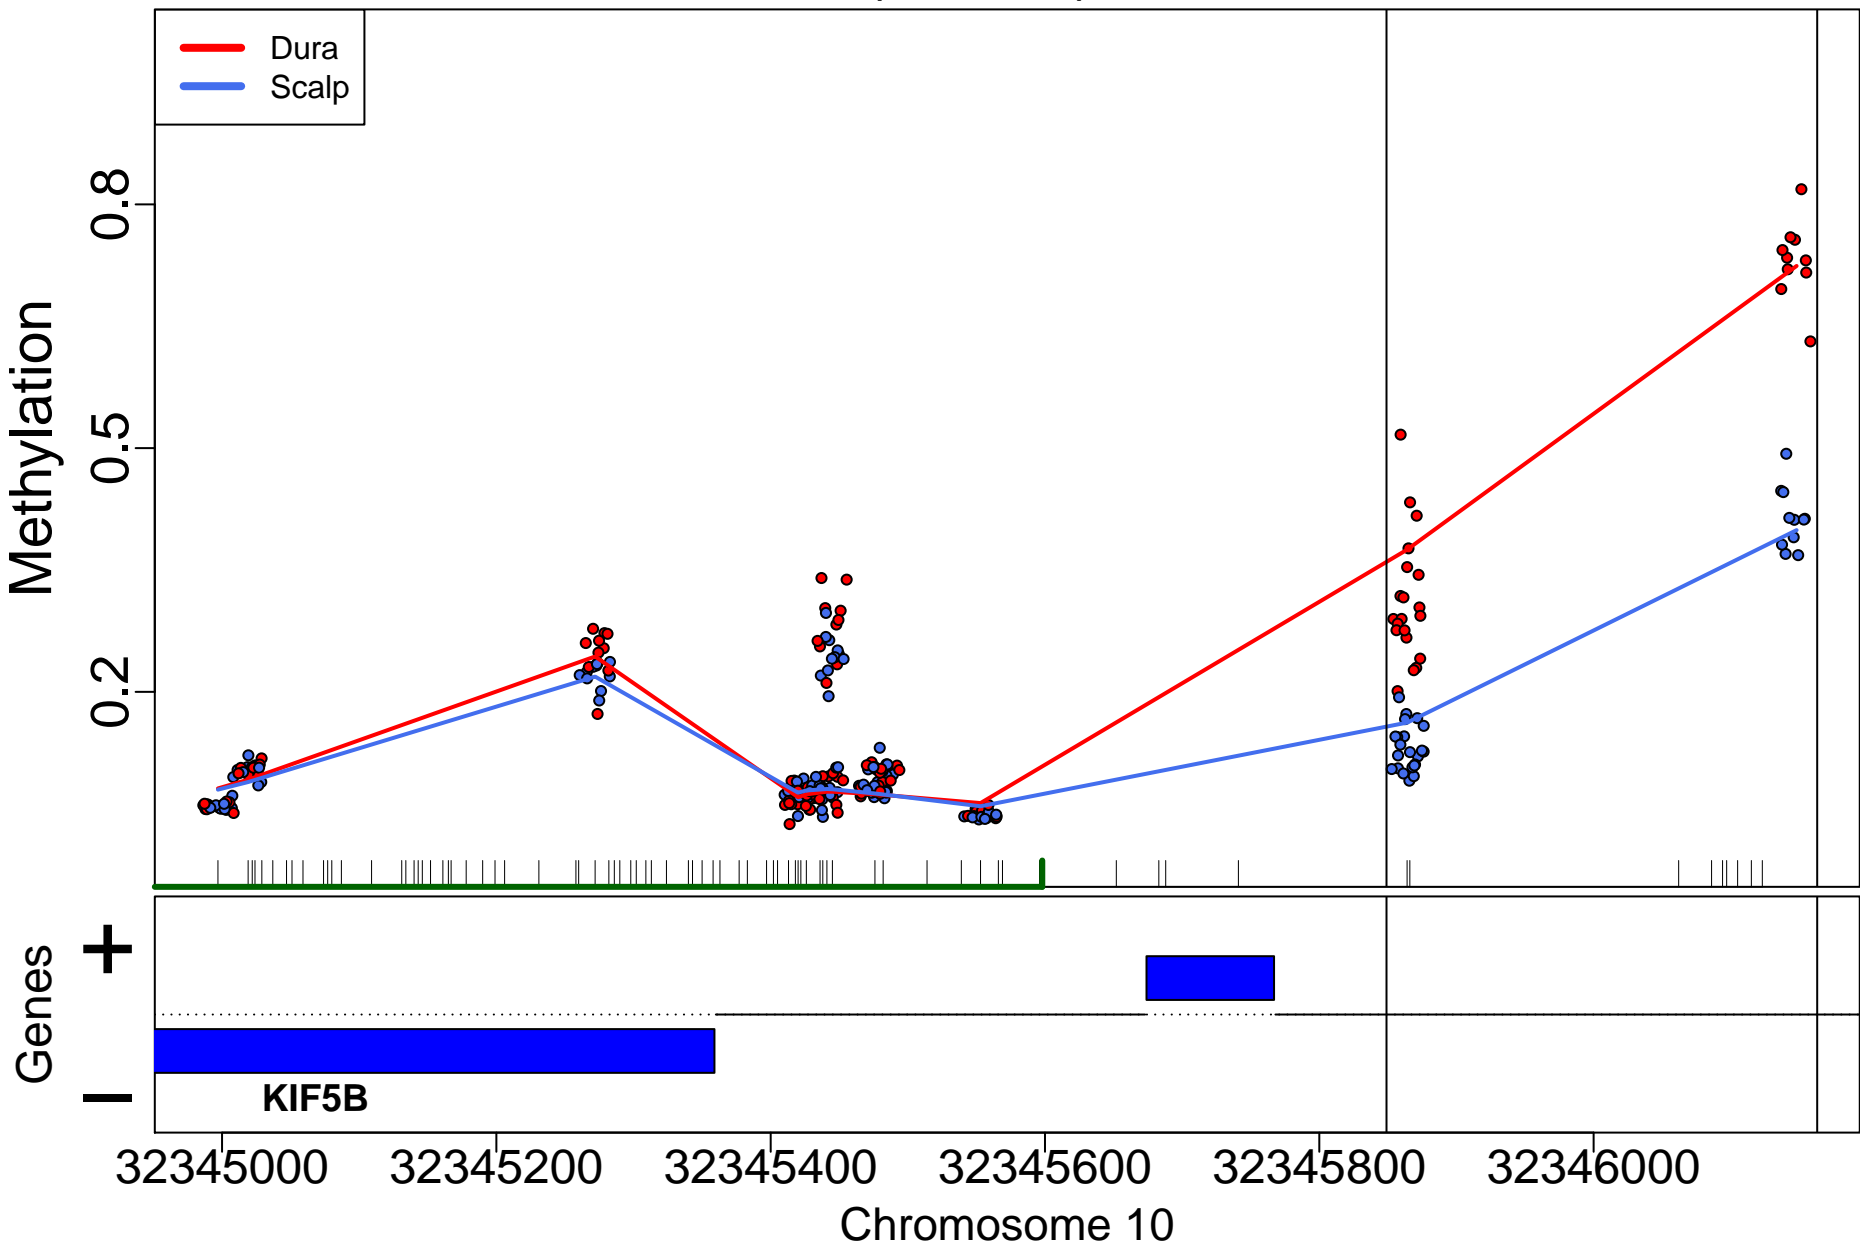



CD248; 326bp from tss:promoter

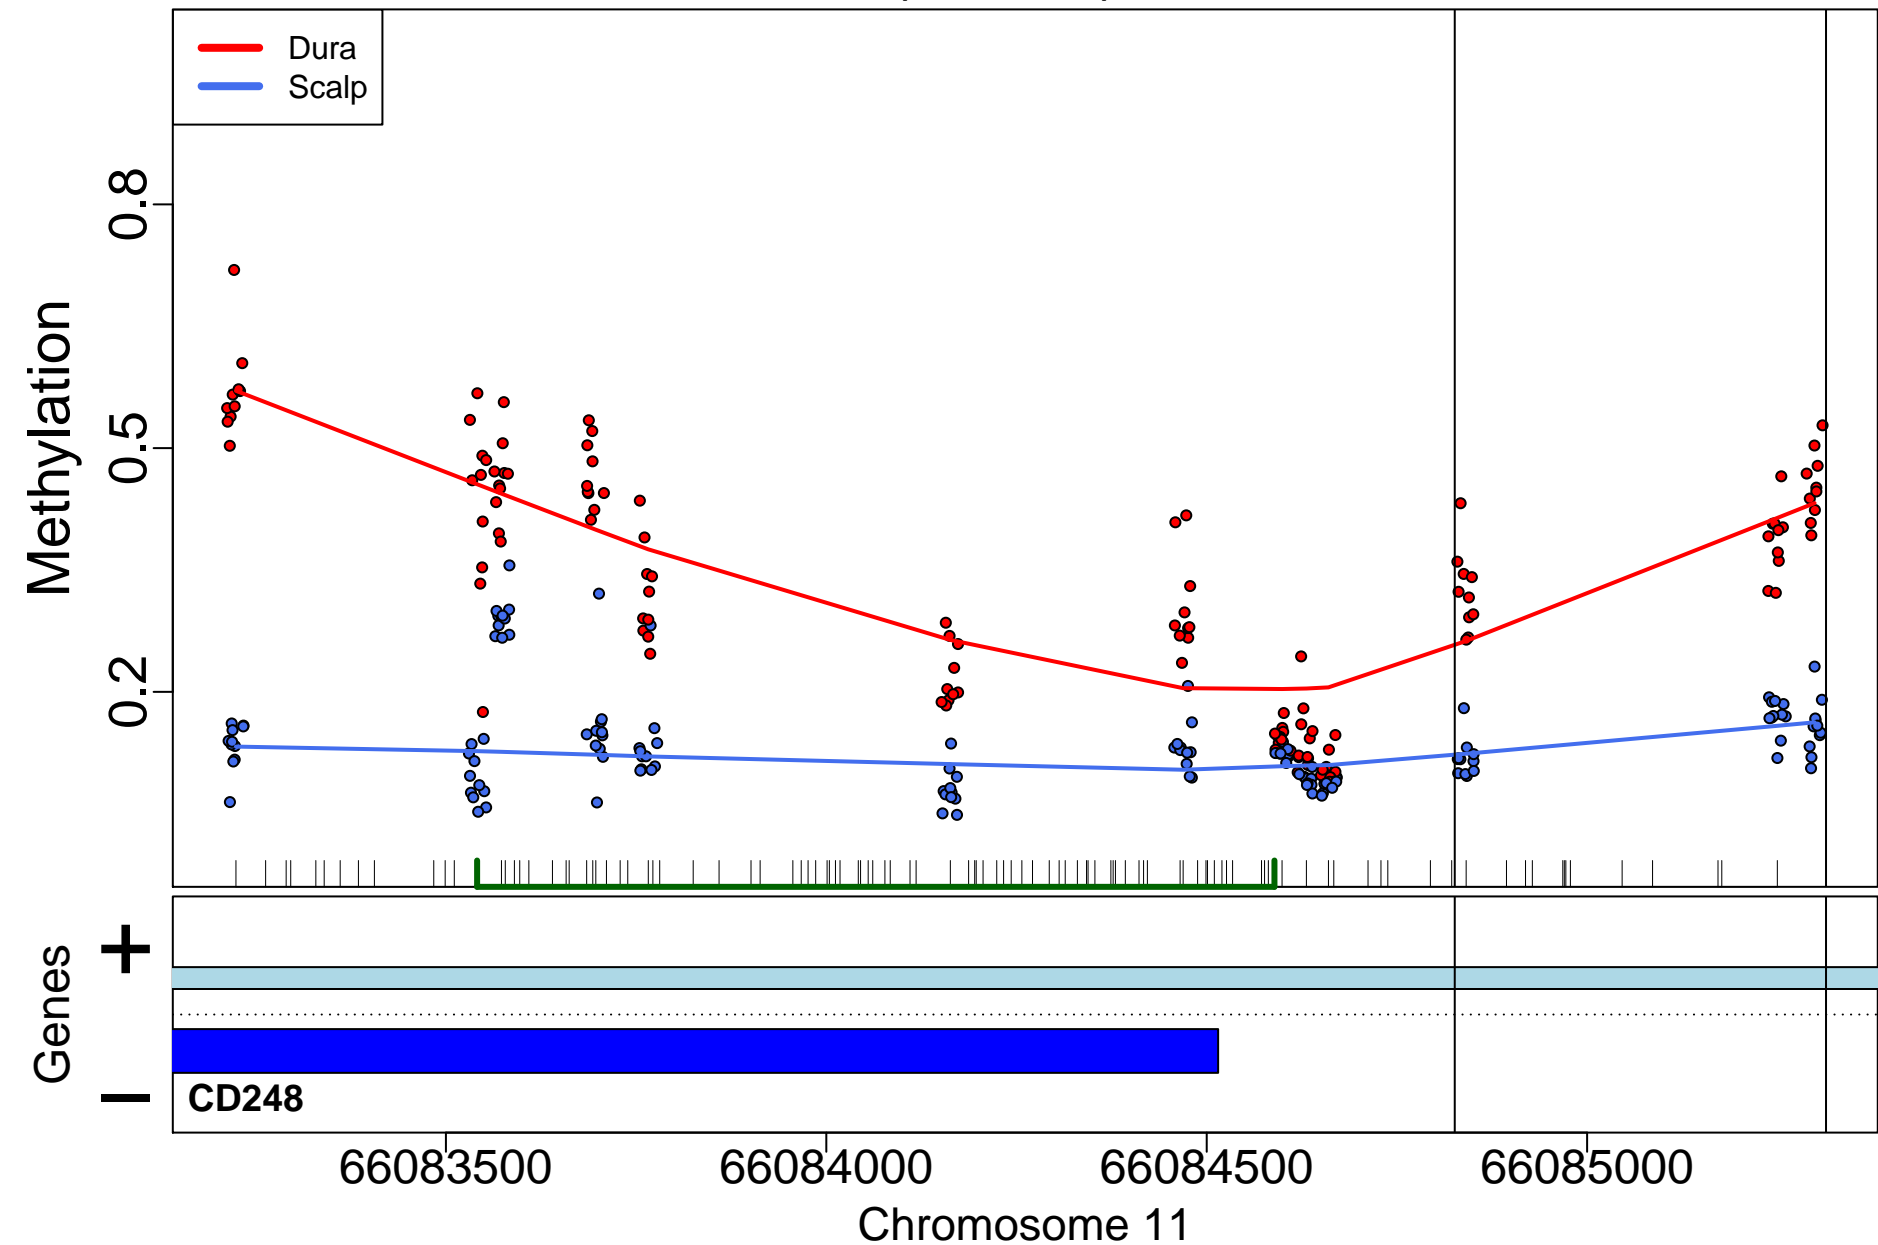

SIX4; 36bp from tss:promoter

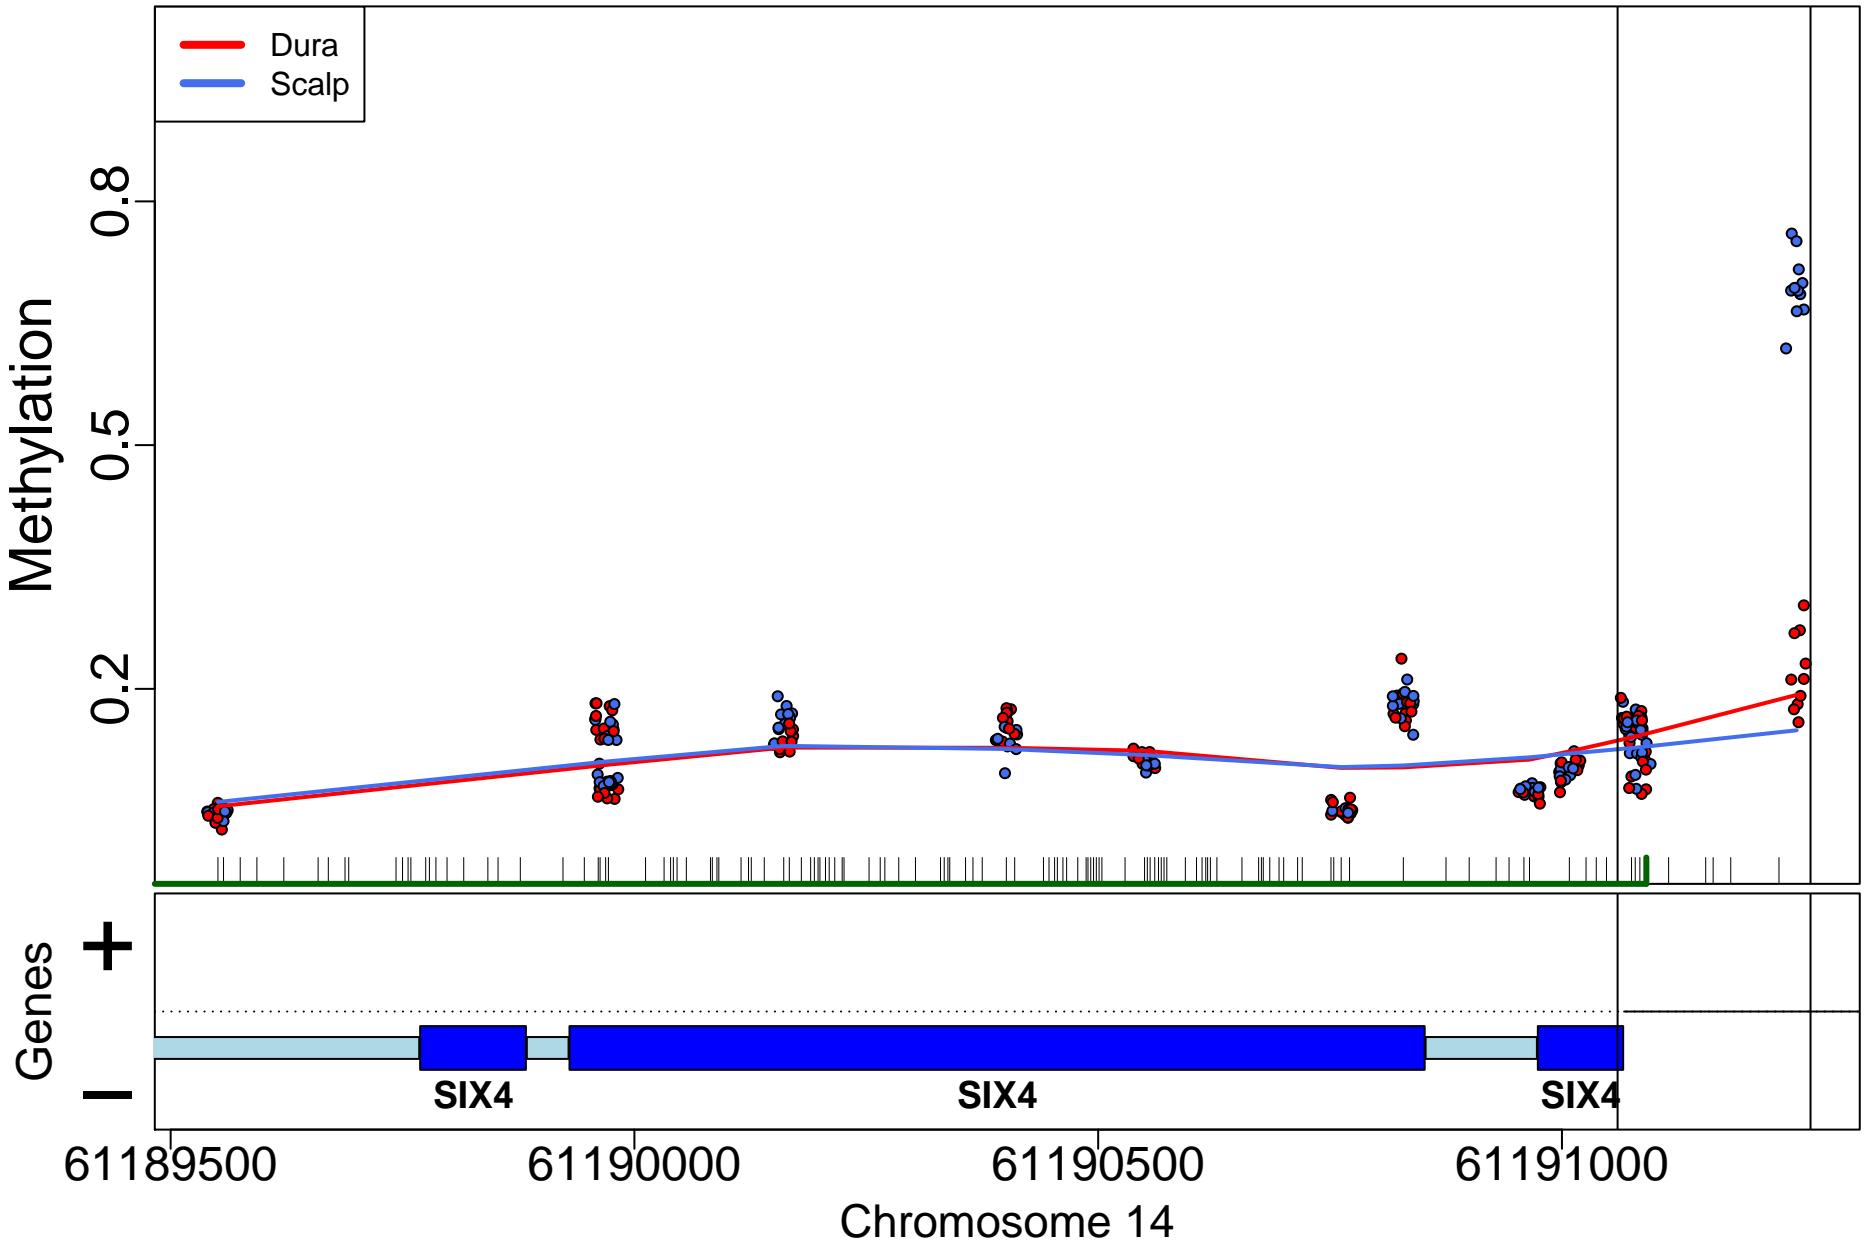

SOX9; 3974bp from tss:upstream

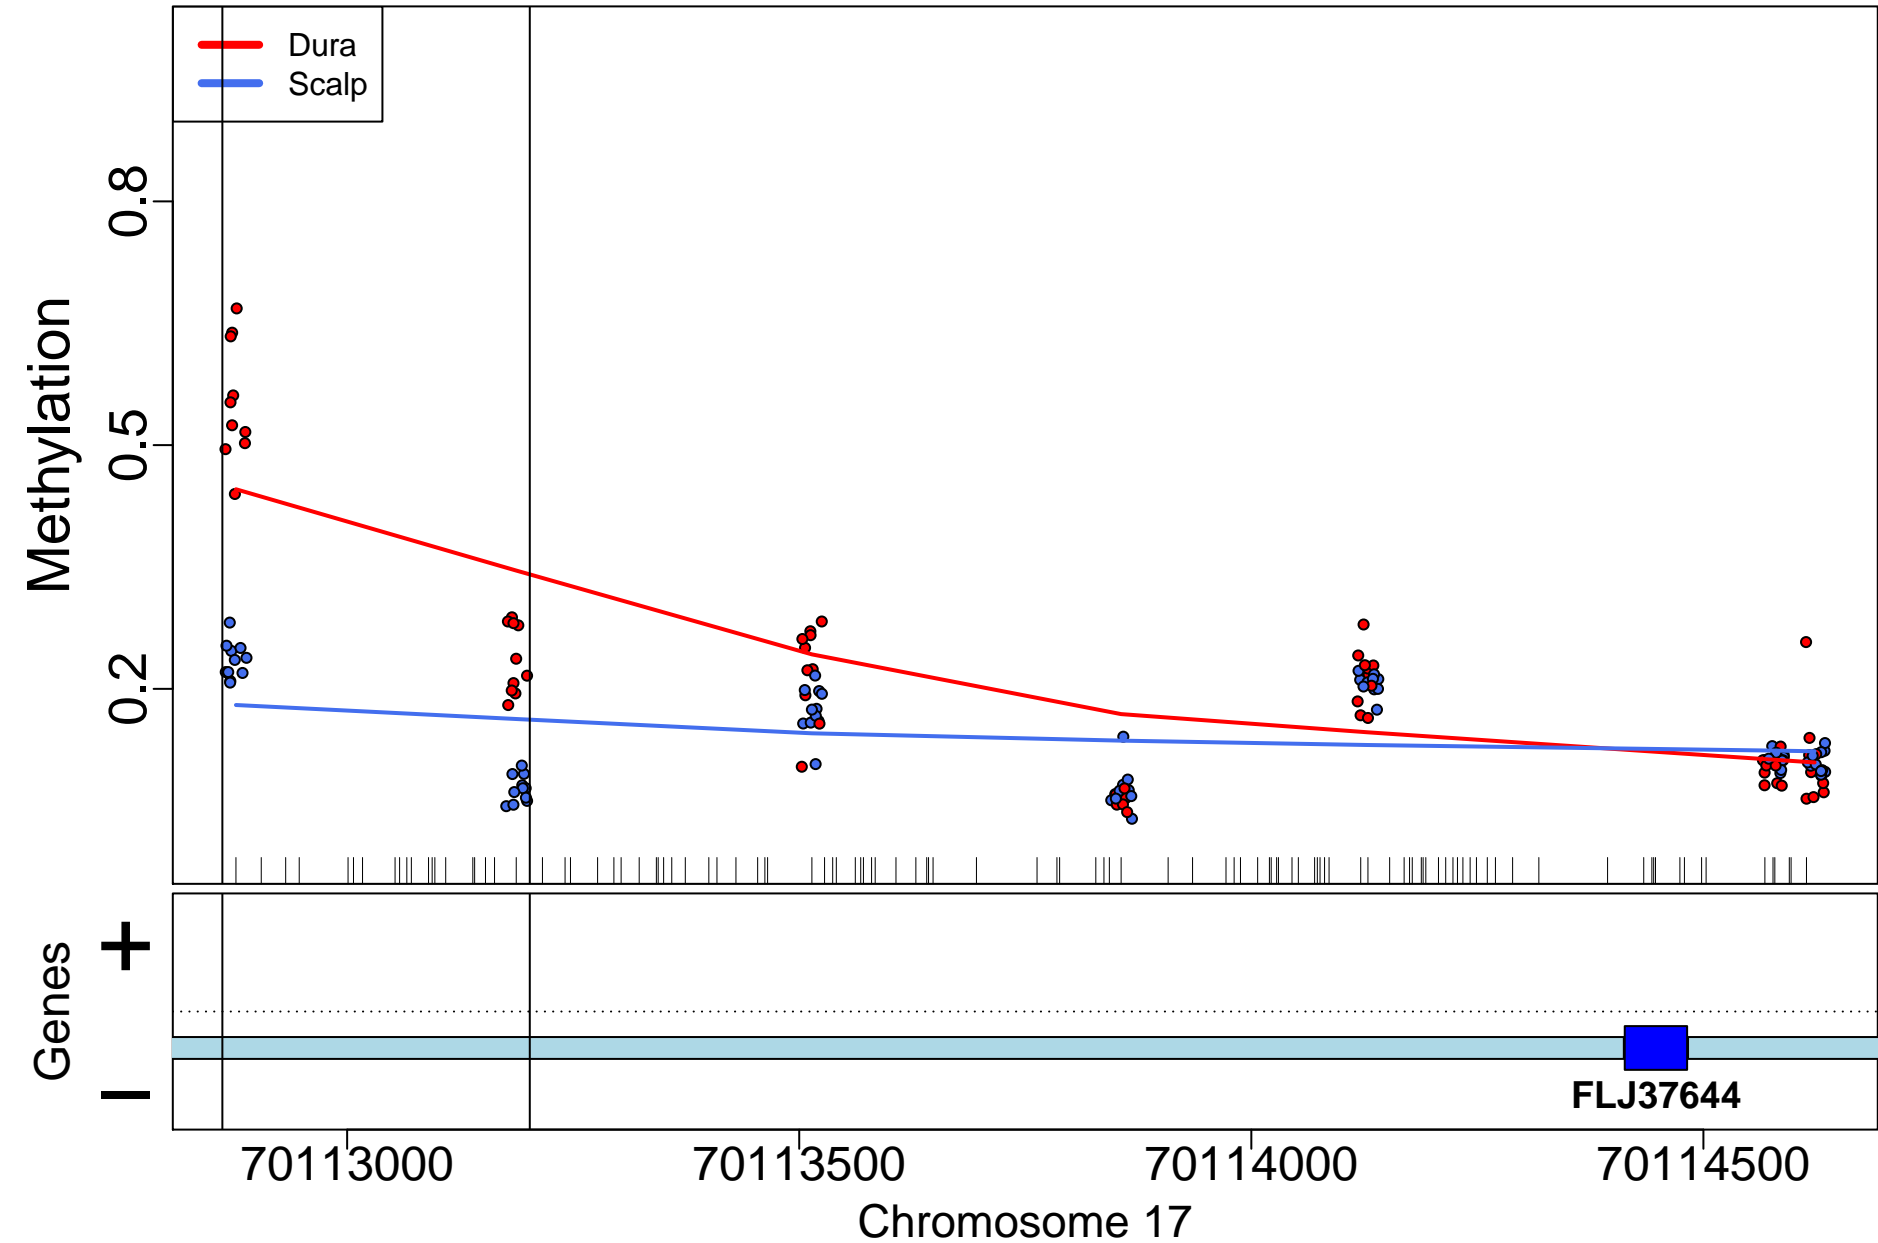

CMAHP; 649bp from tss:inside exon

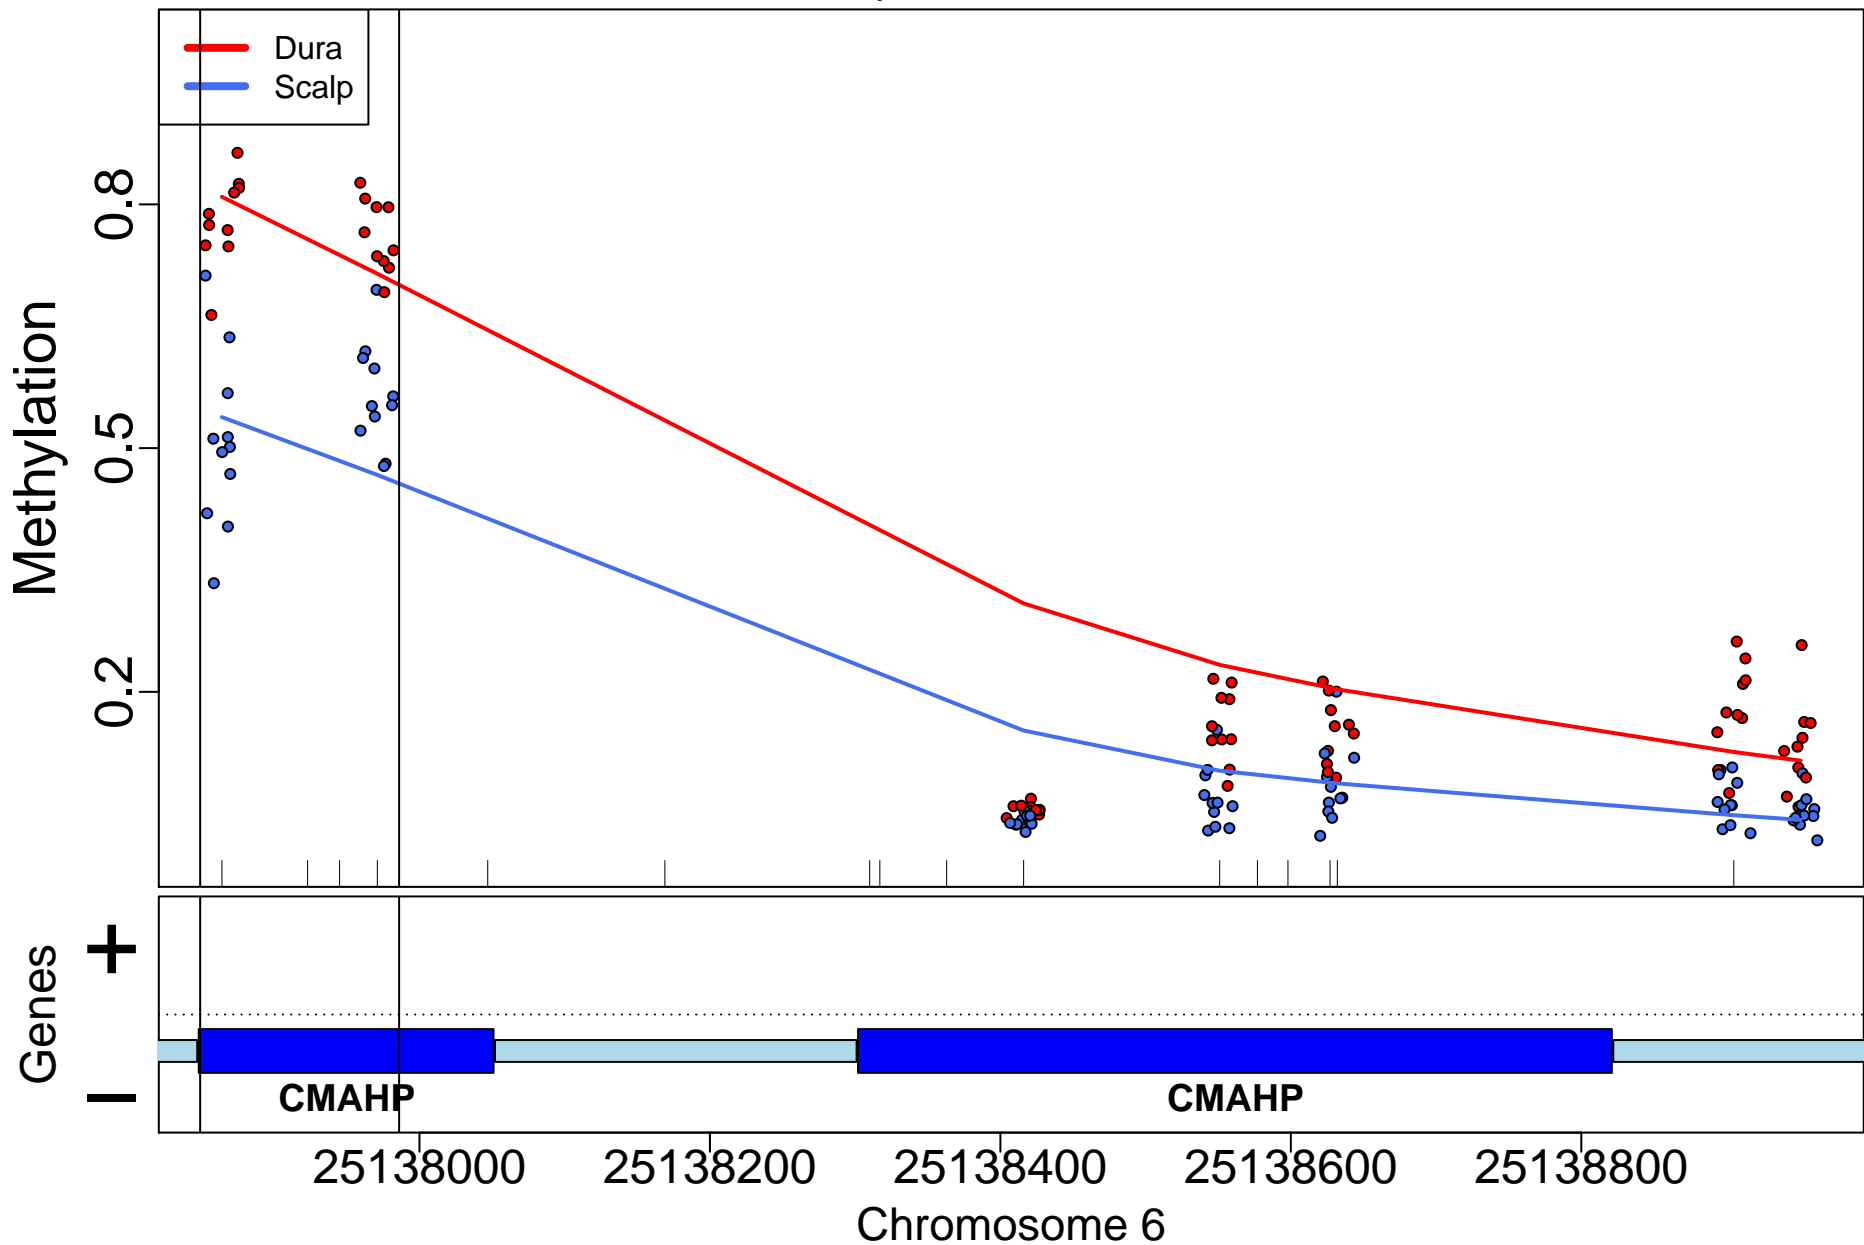

# FOXP2; 22bp from tss:overlaps exon downstream

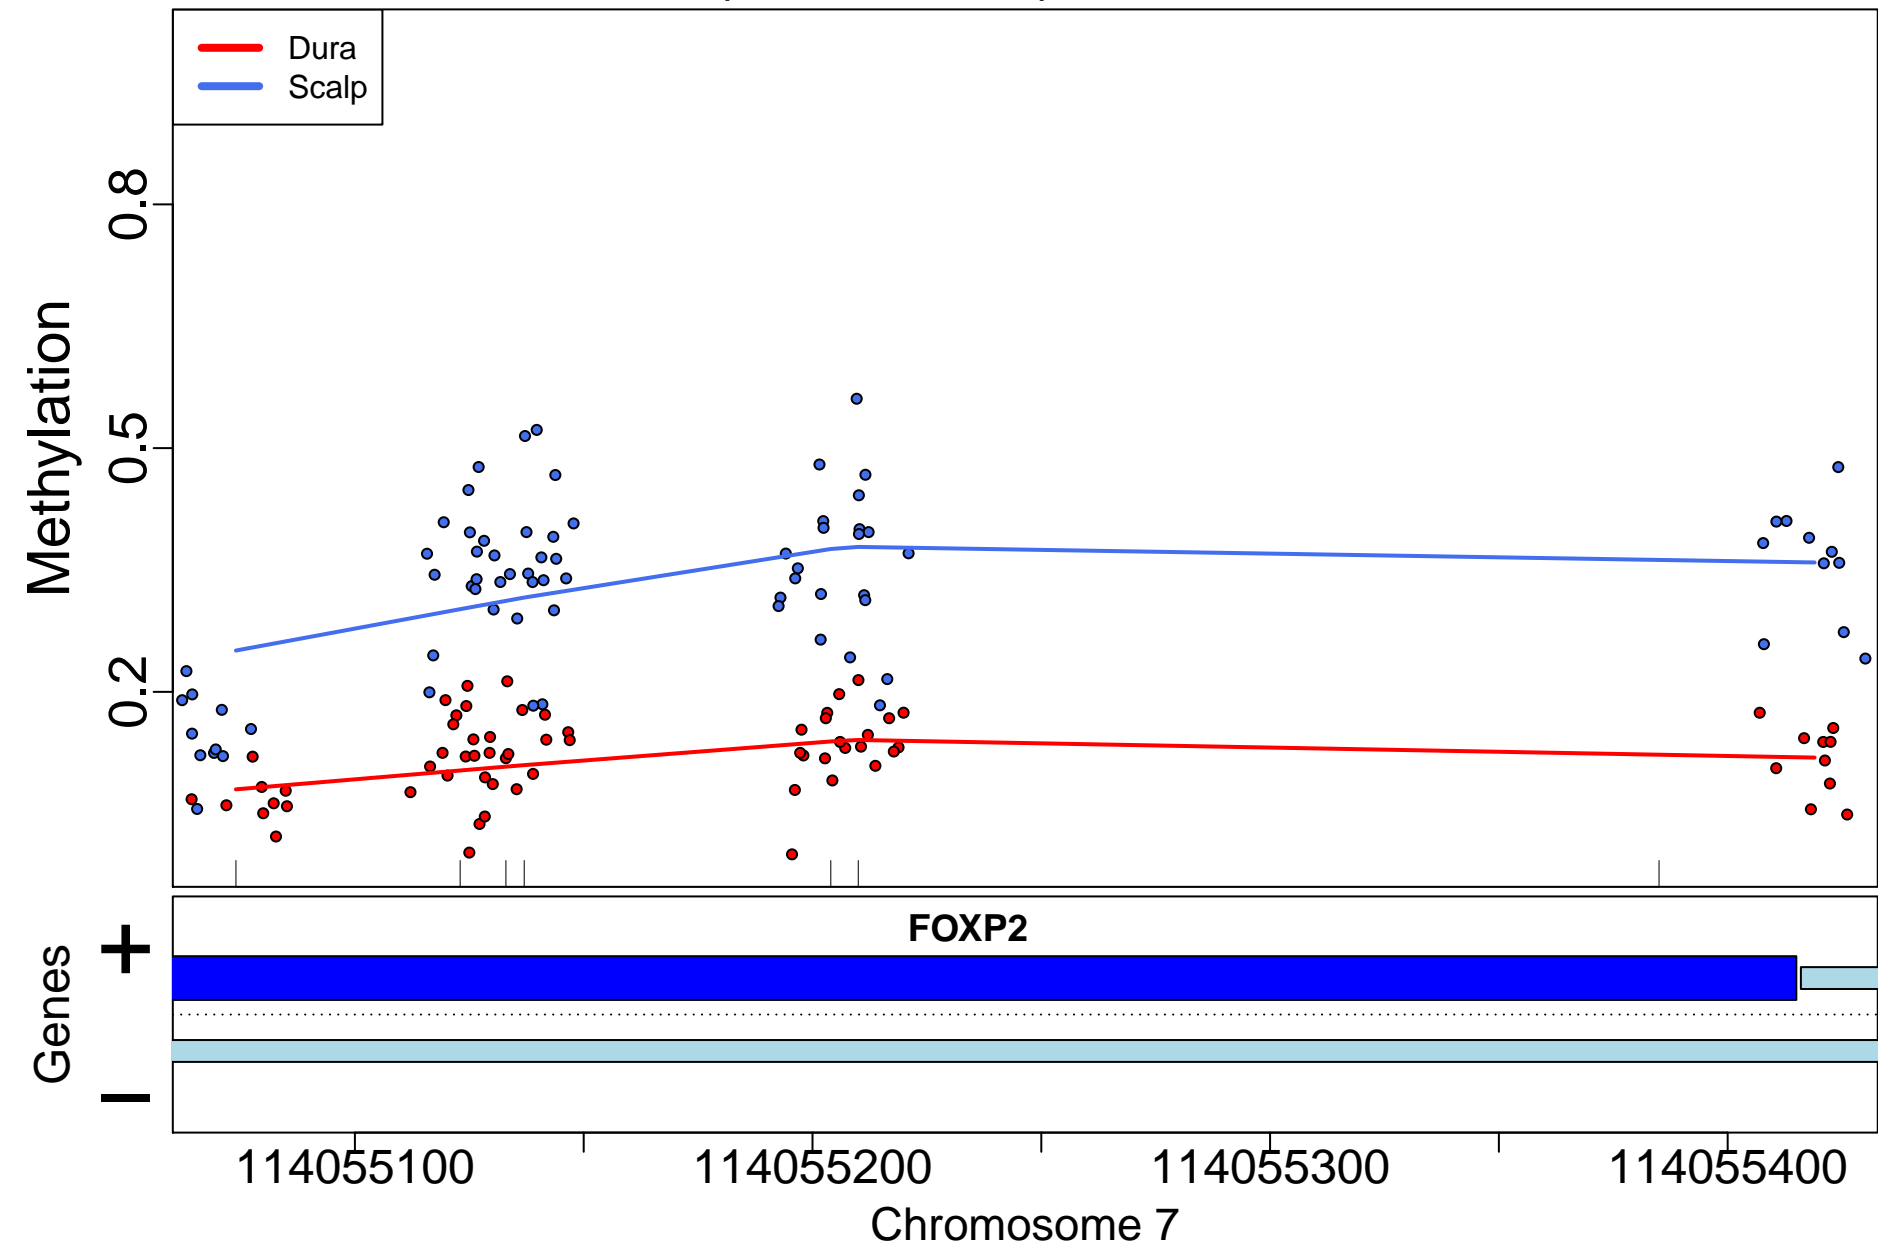

PRRT1; 3781bp from tss:inside exon

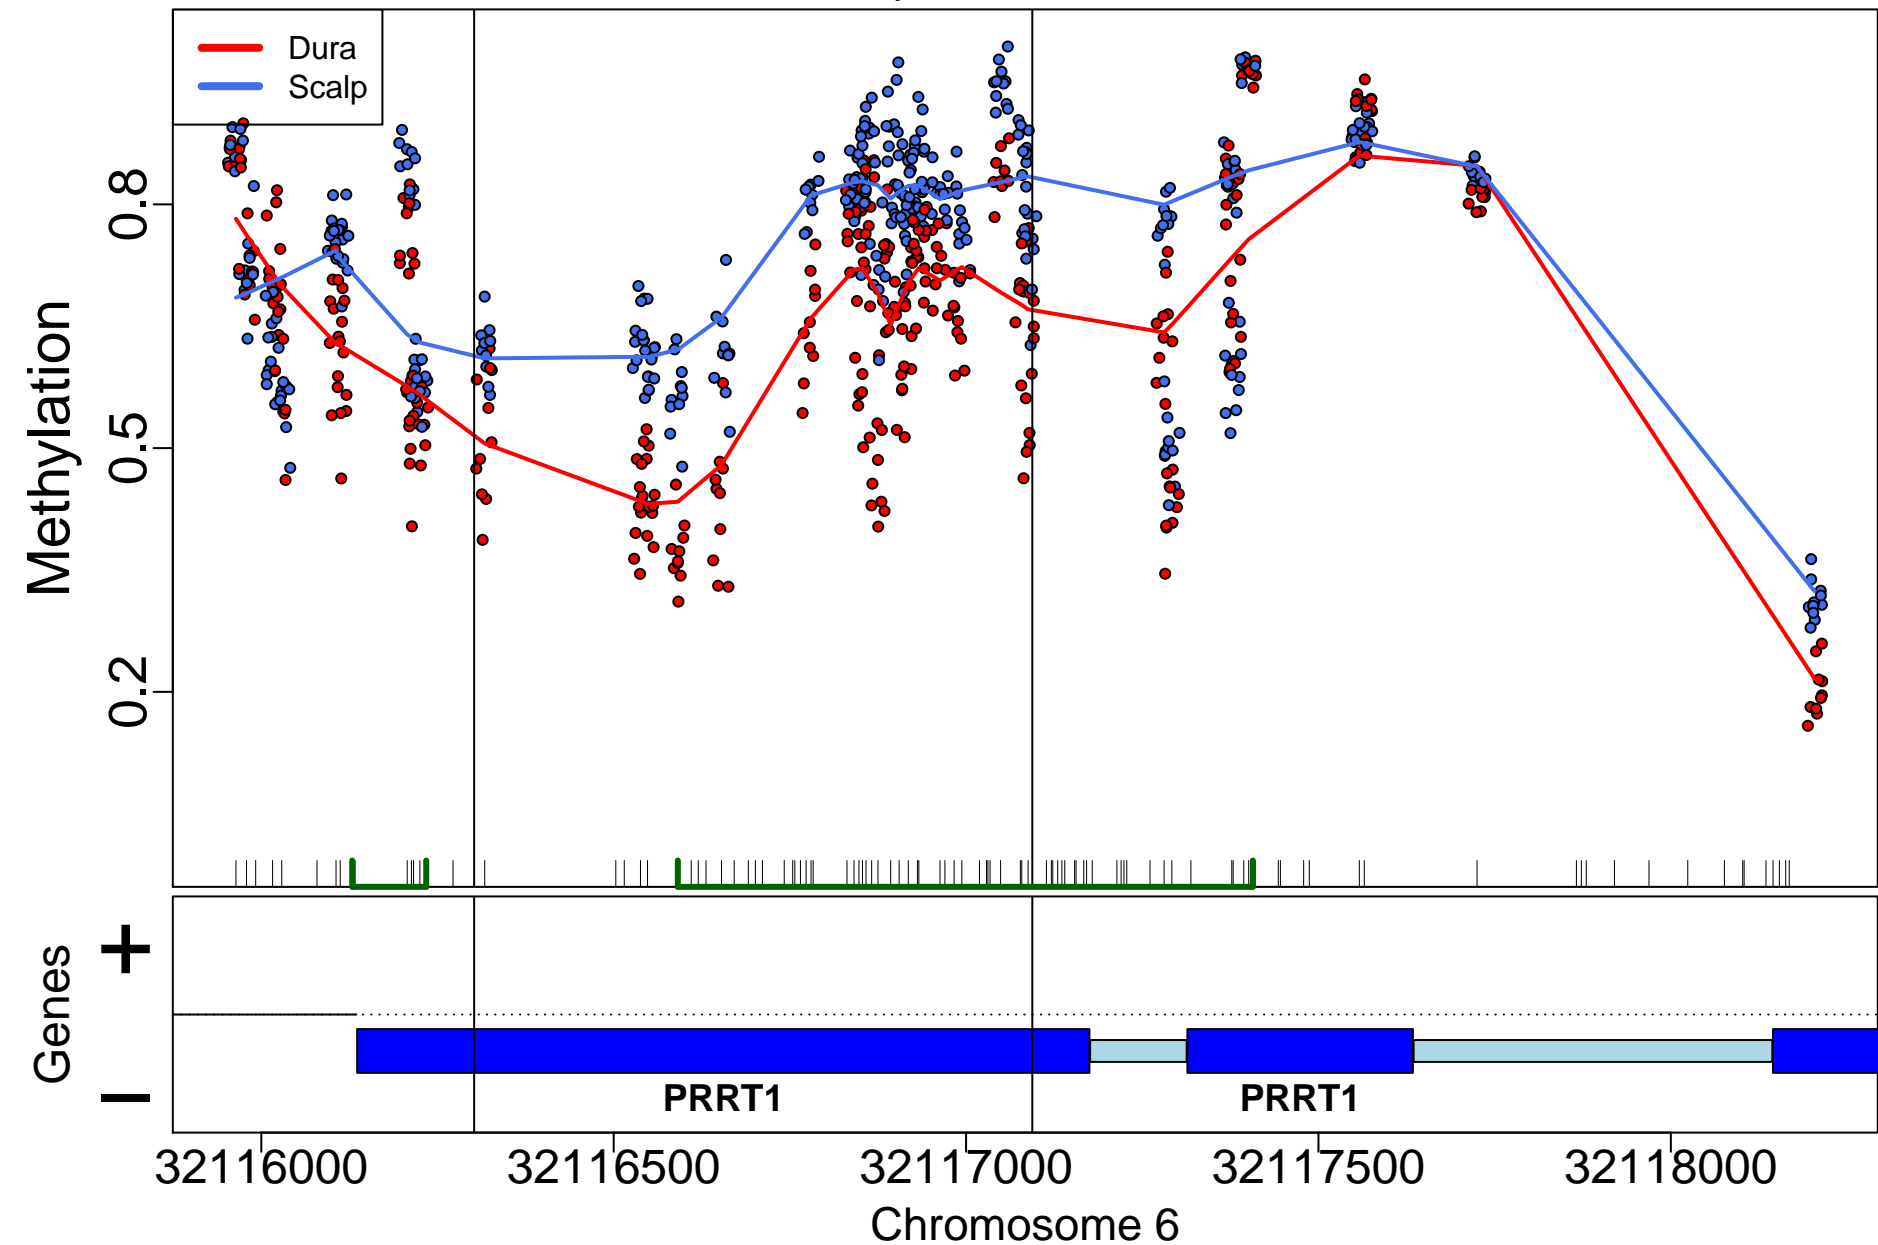

RNU6-16P; 0bp from tss:NA

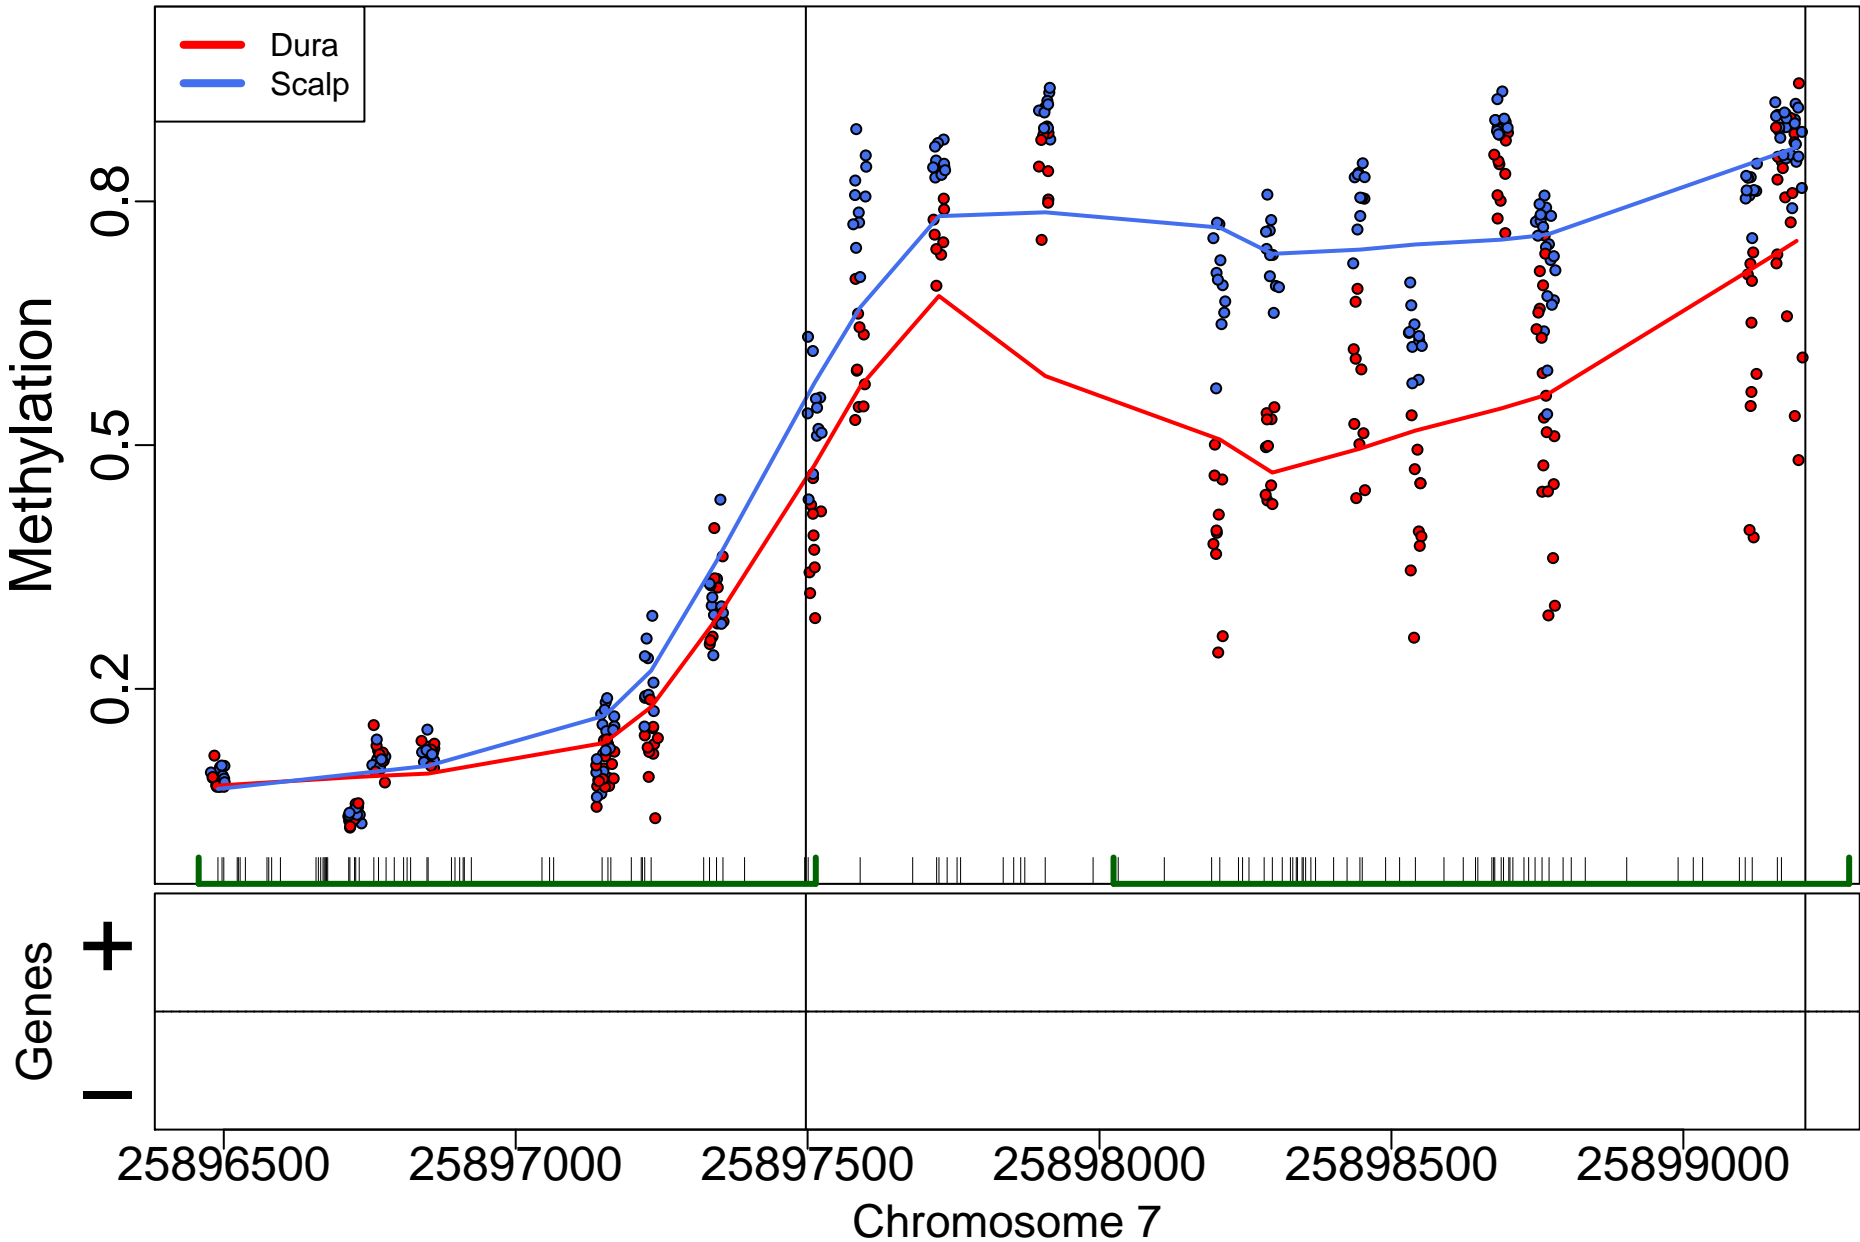

MCF2L; 0bp from tss:overlaps 5'

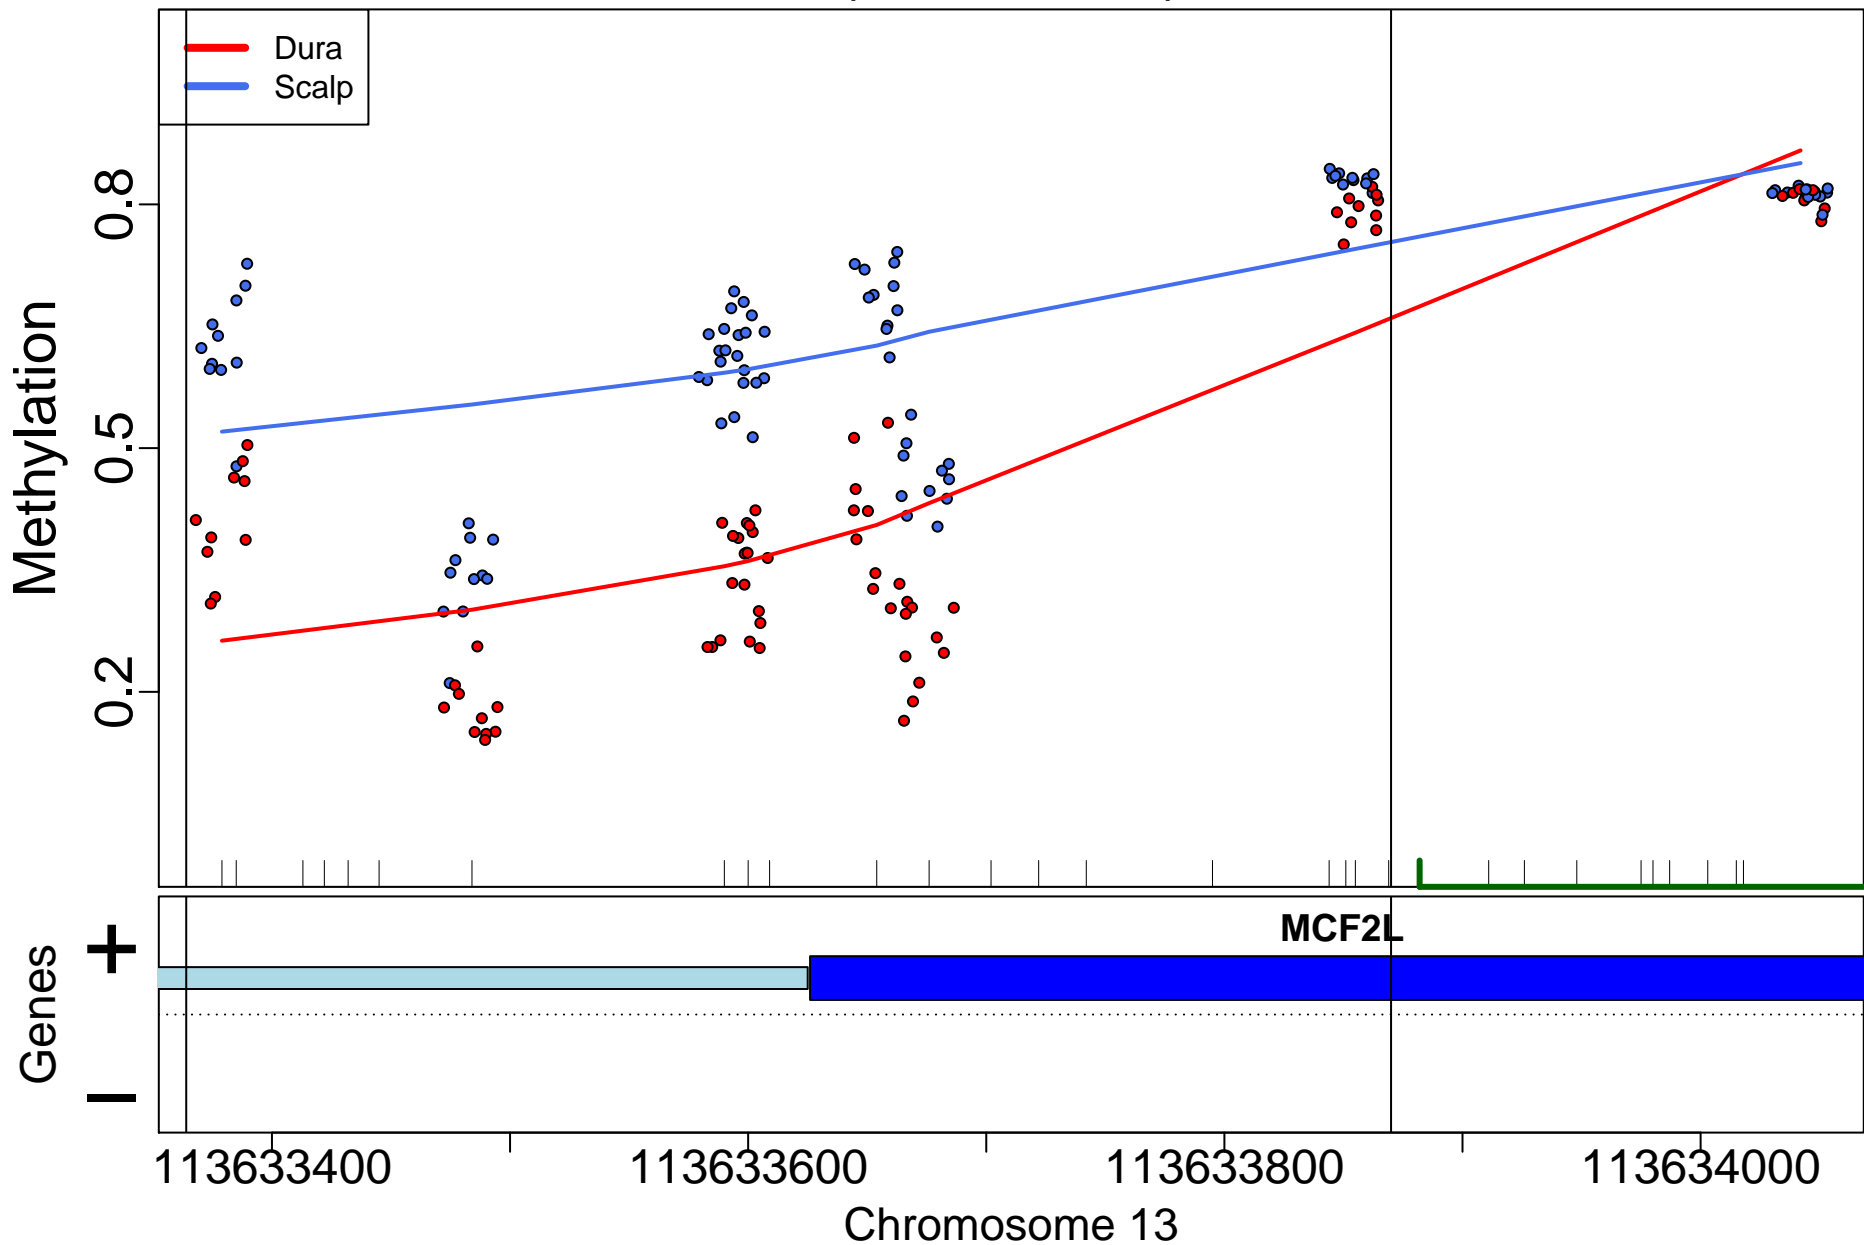



C11orf53; 28035bp from tss:overlaps exon upstream

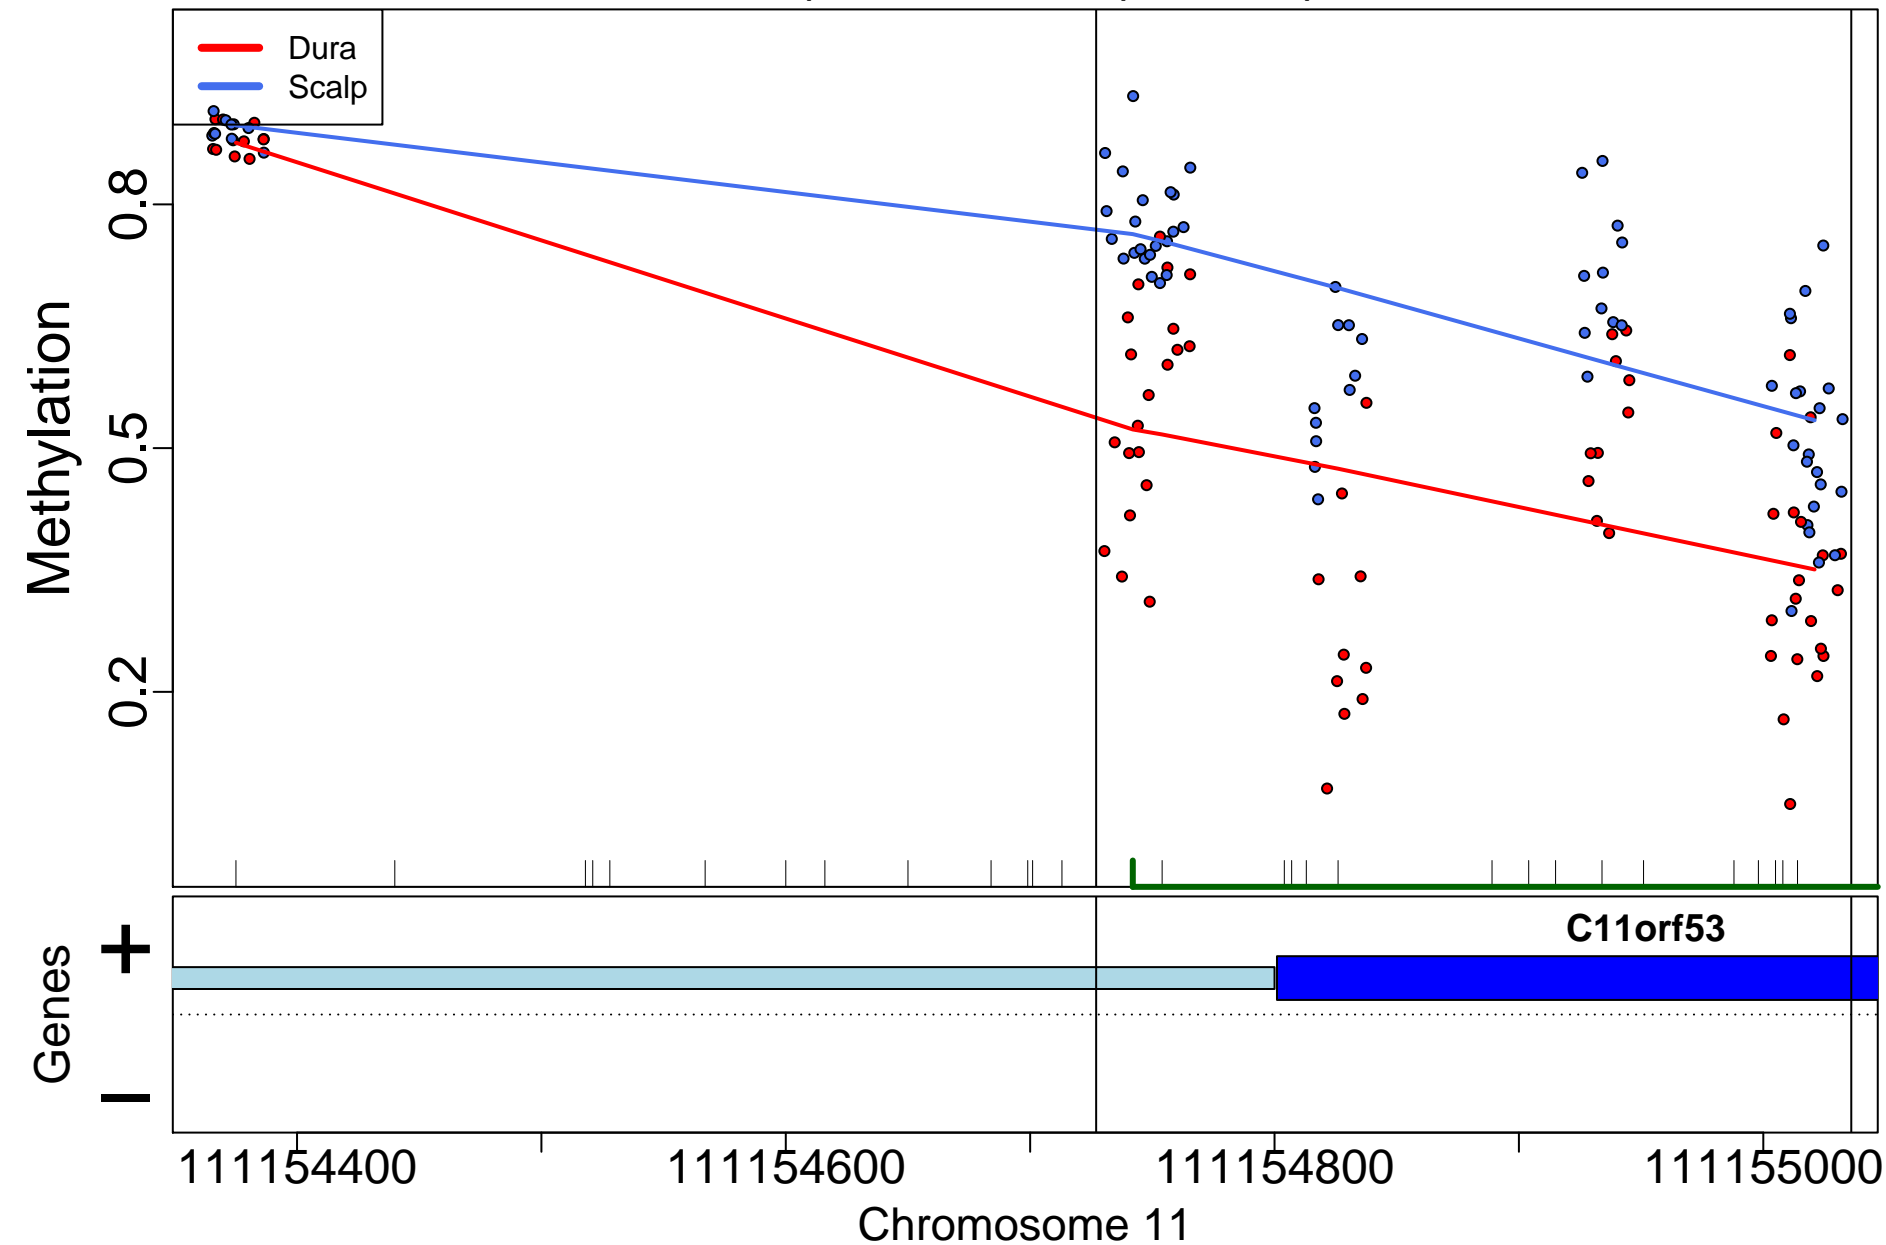

# HPSE2; 715bp from tss:promoter

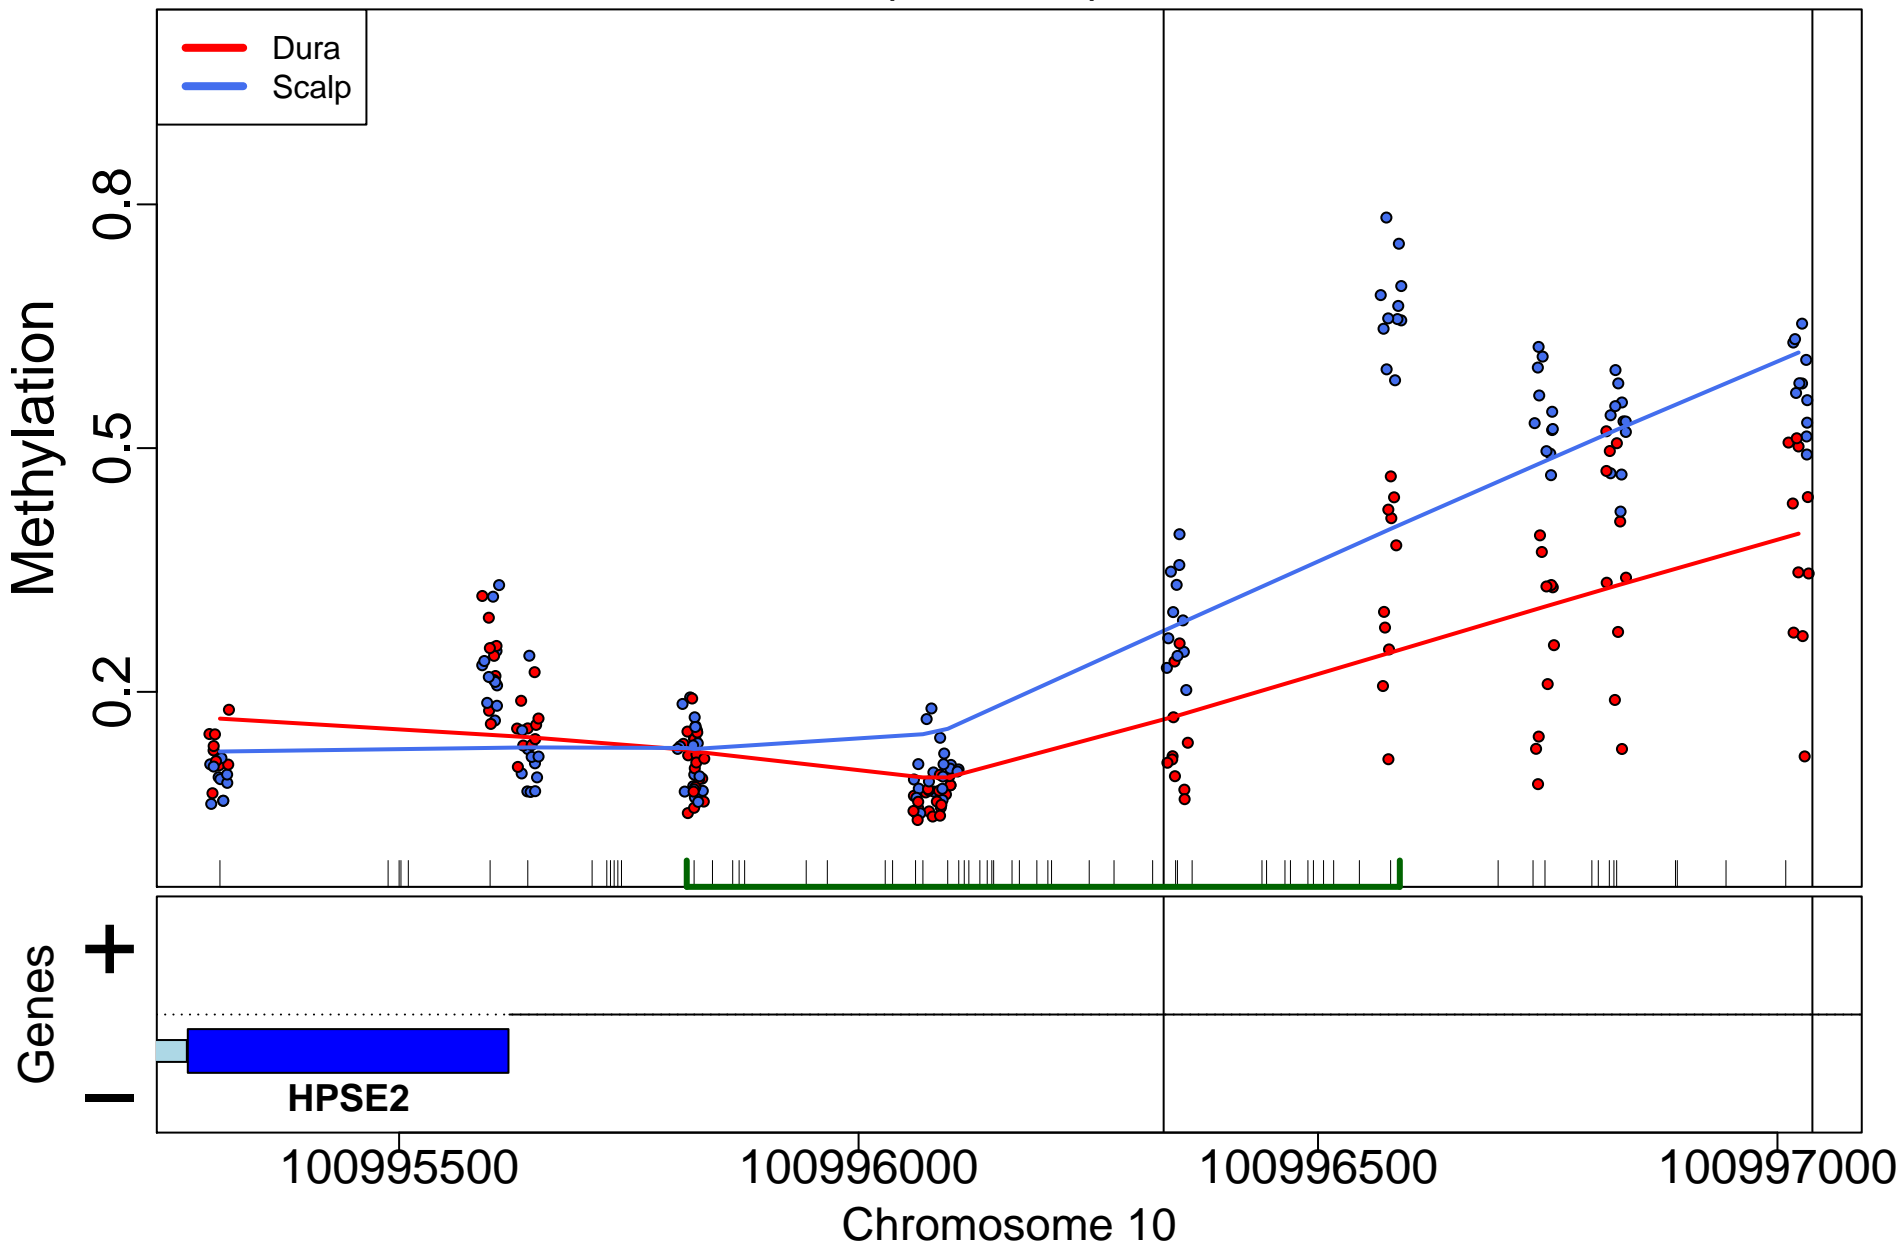

MDFIC; 146bp from tss:promoter

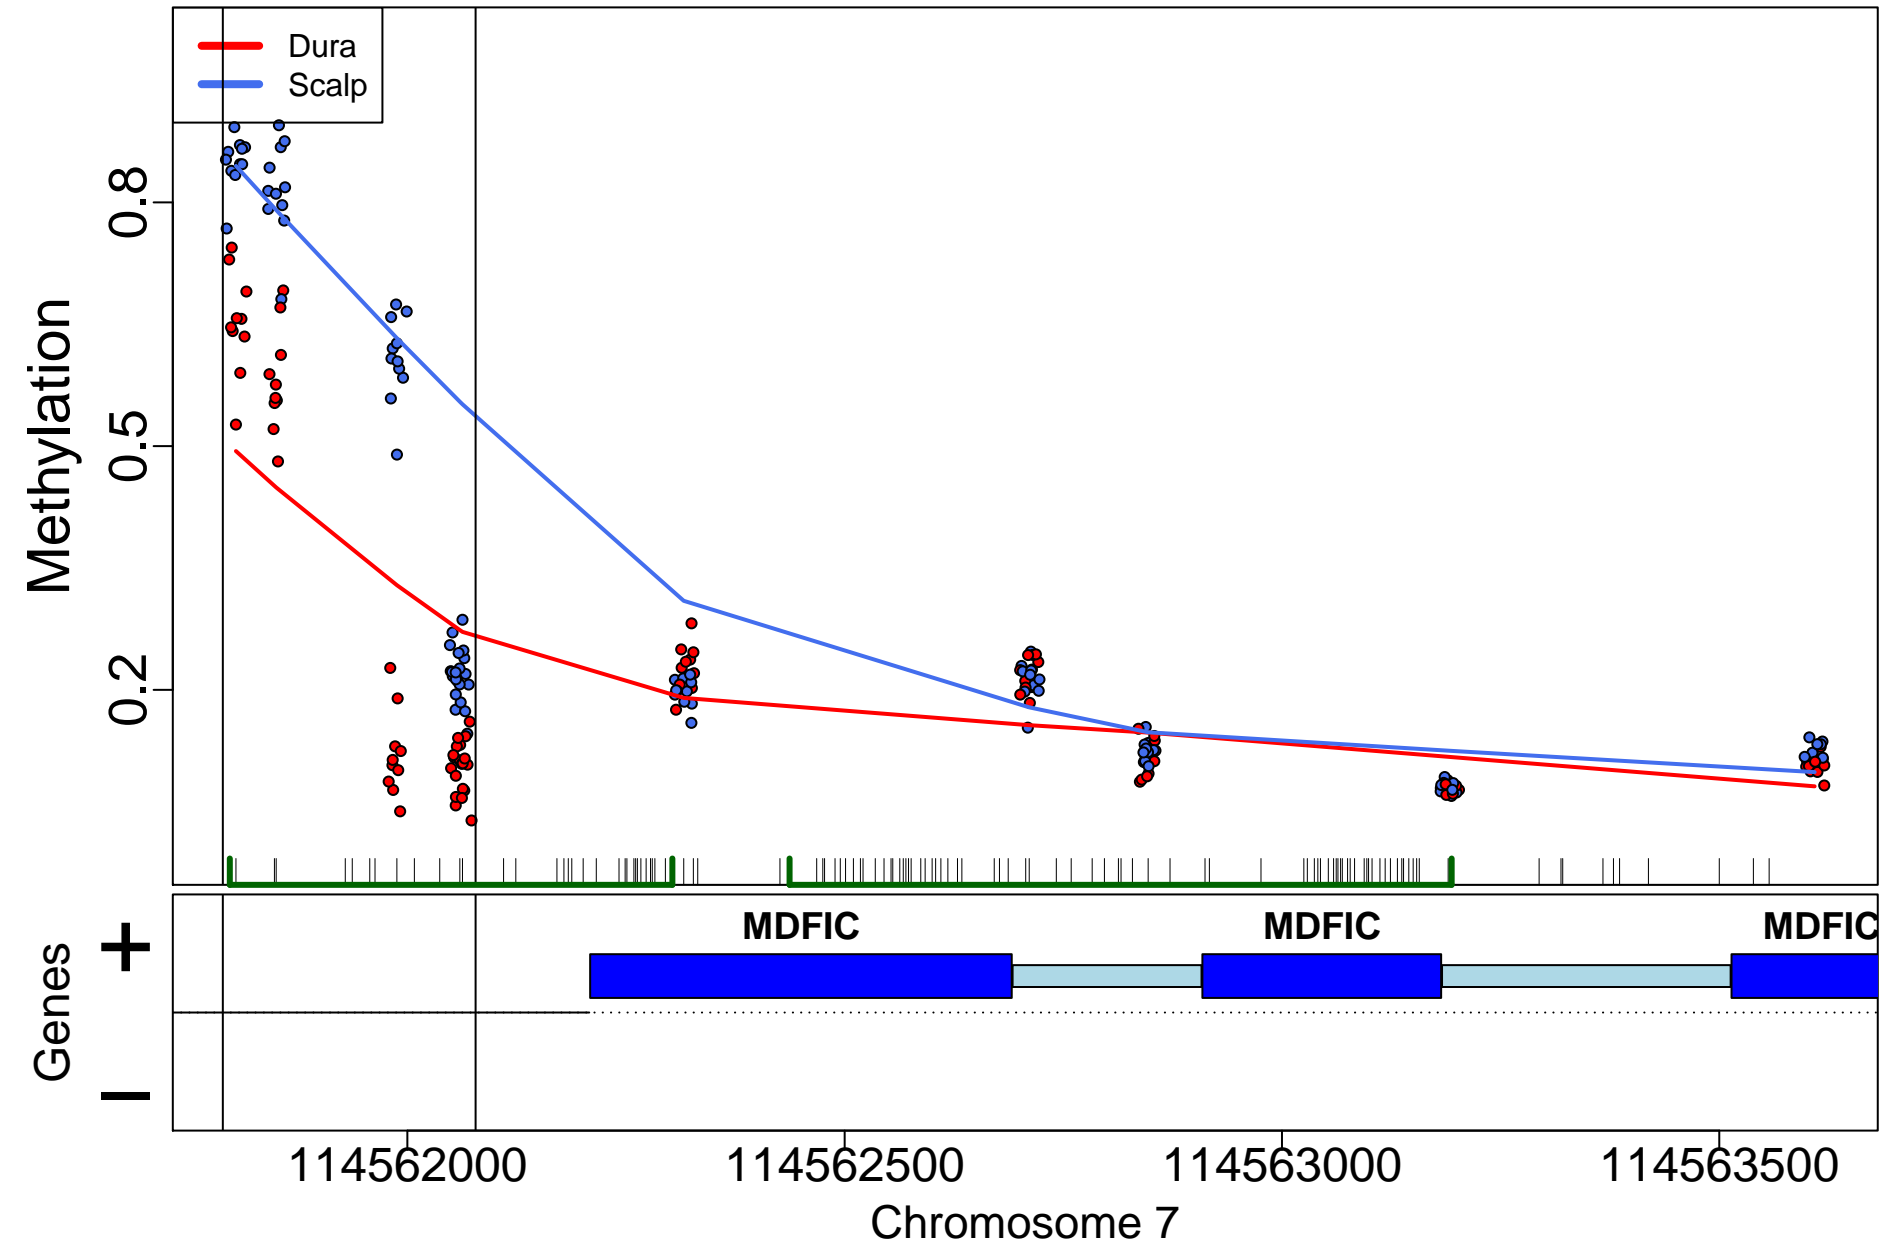

METTL24; 51683bp from tss:inside intron

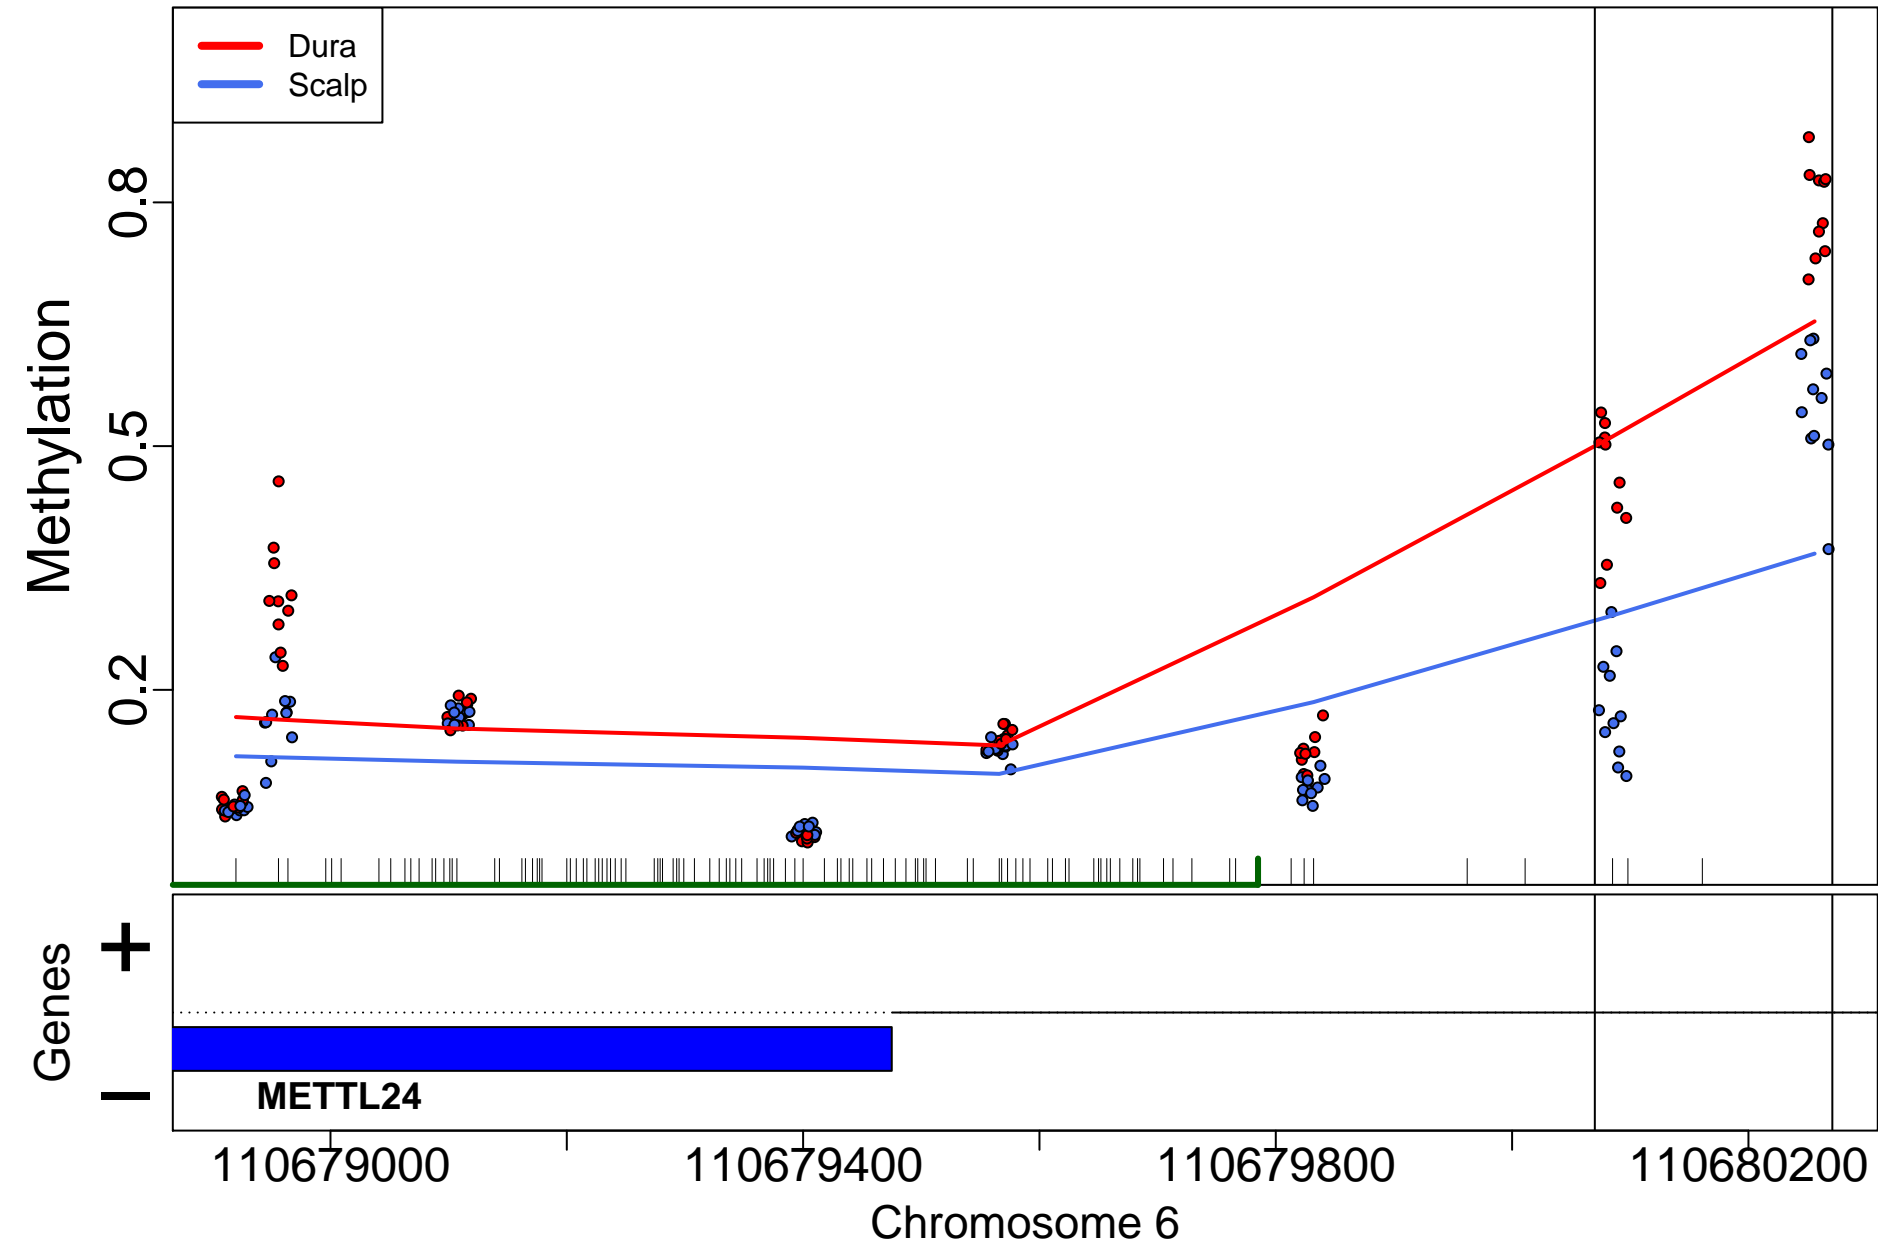

# DLEU1; 0bp from tss:NA

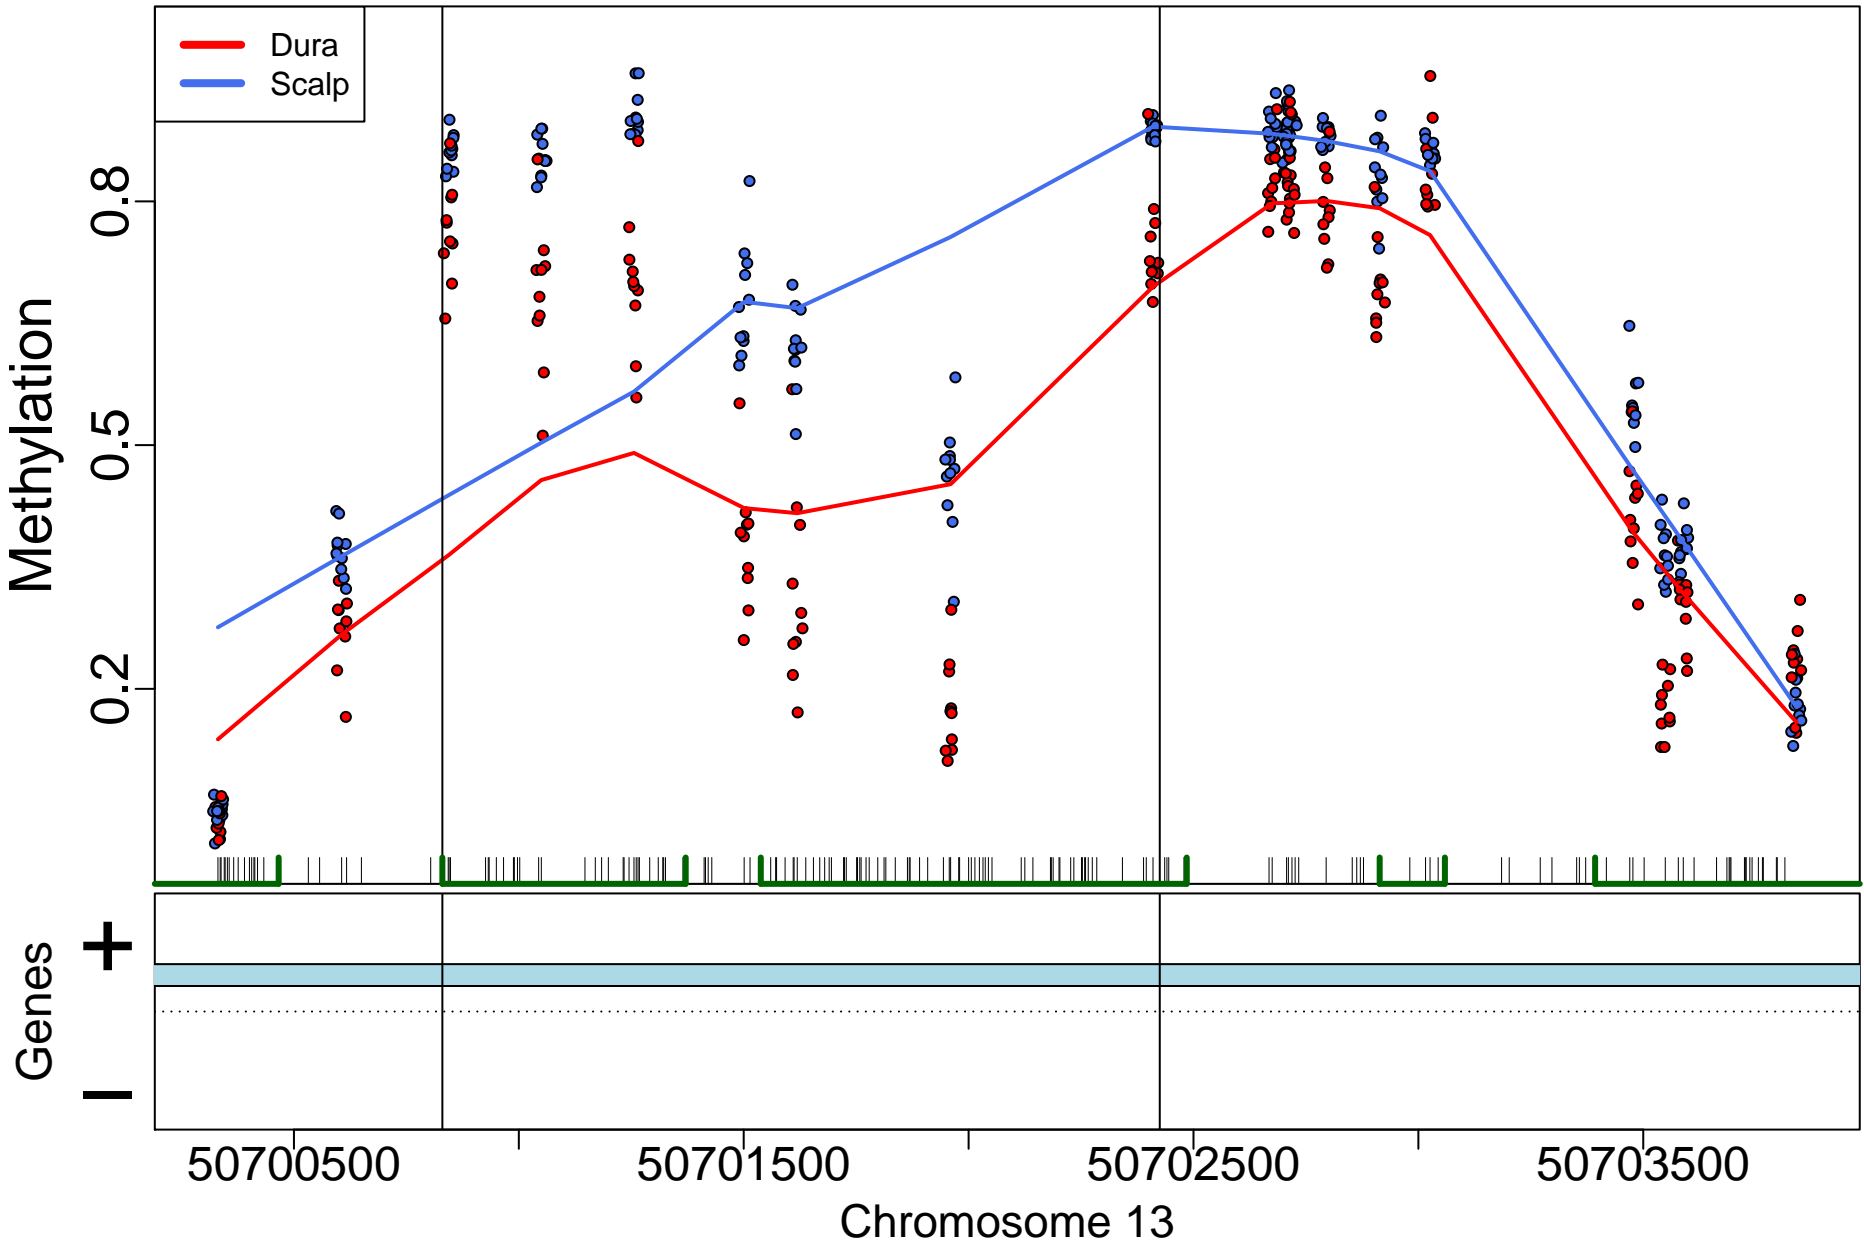

# WNT5A; 1924bp from tss:promoter

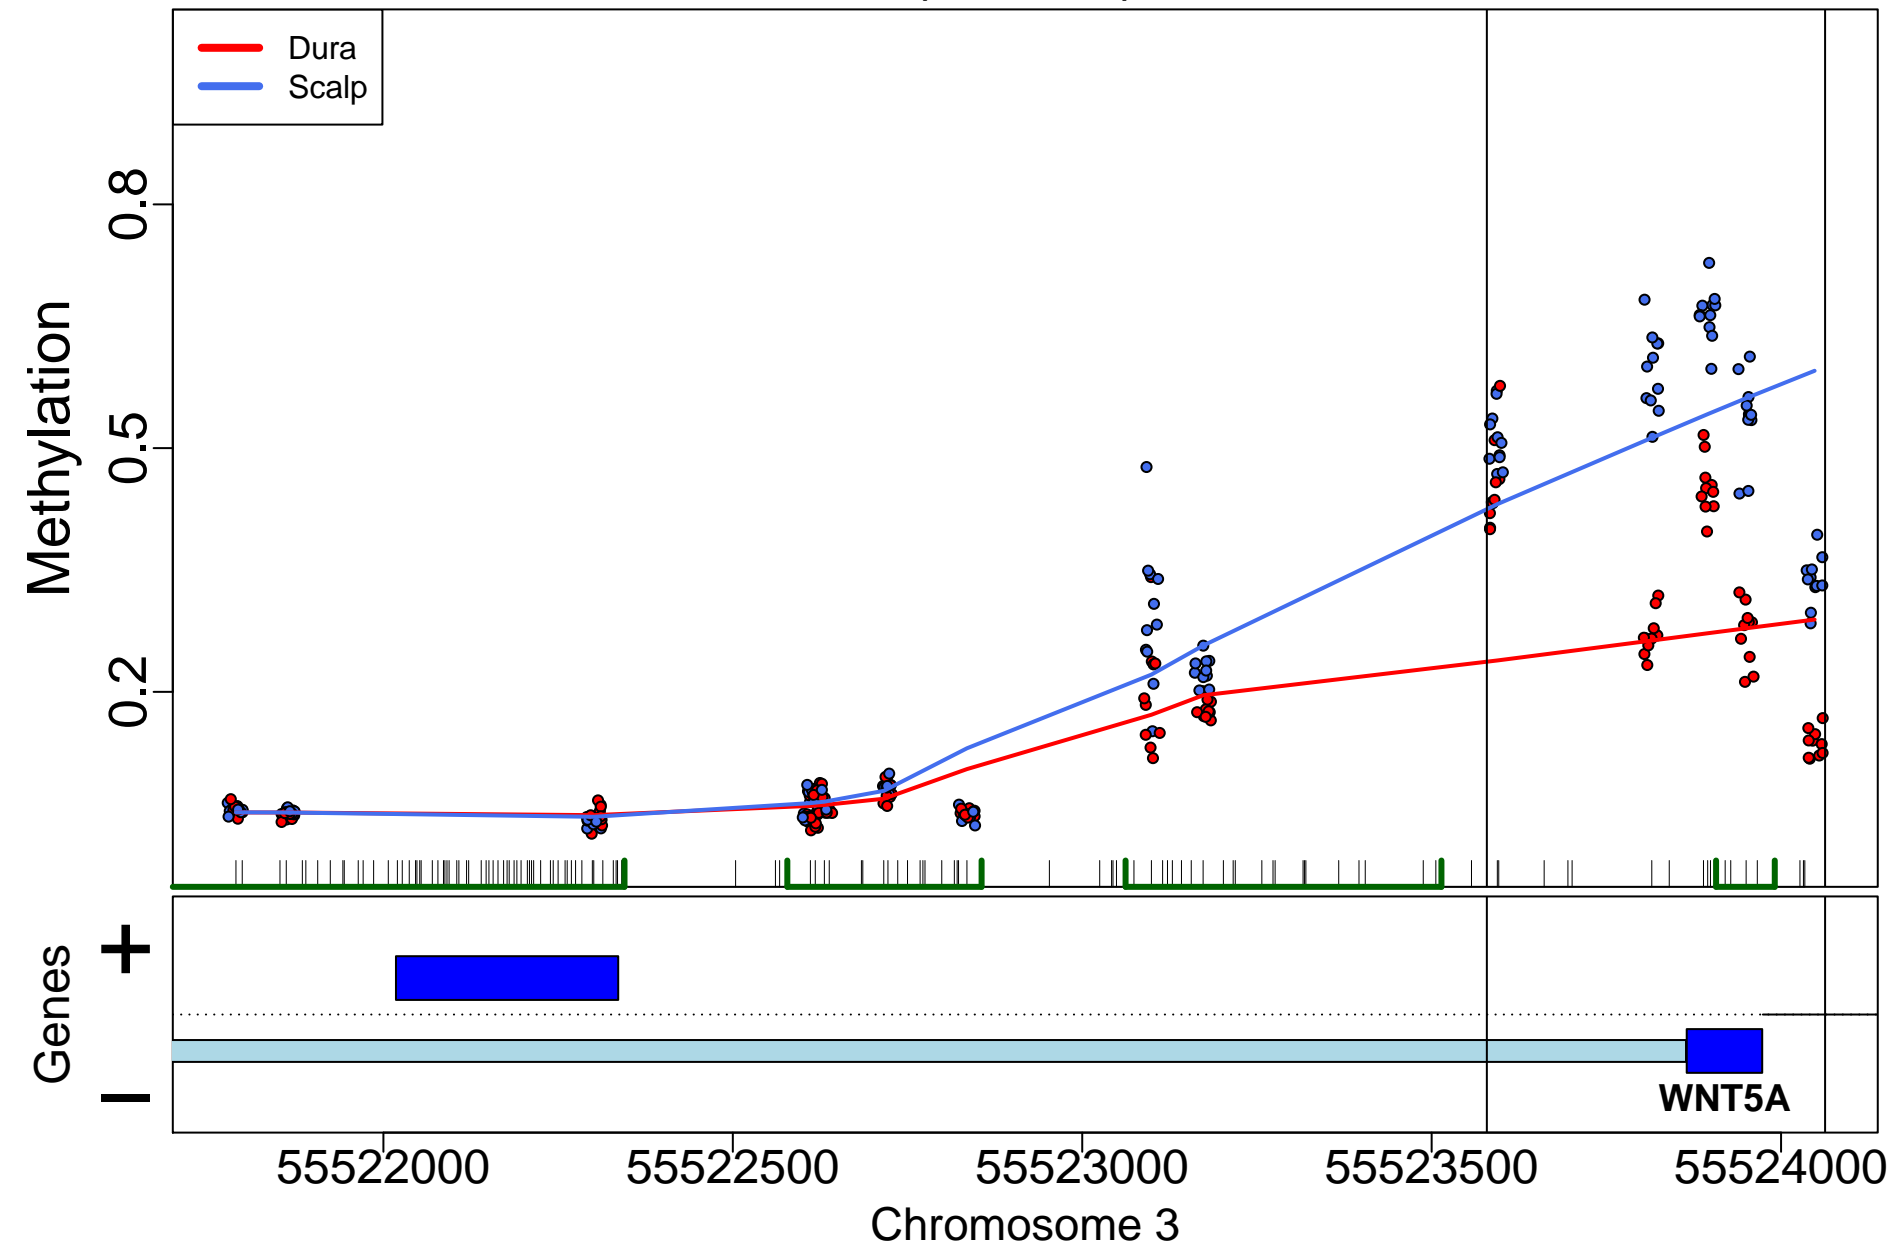

SCPEP1; 658bp from tss:promoter

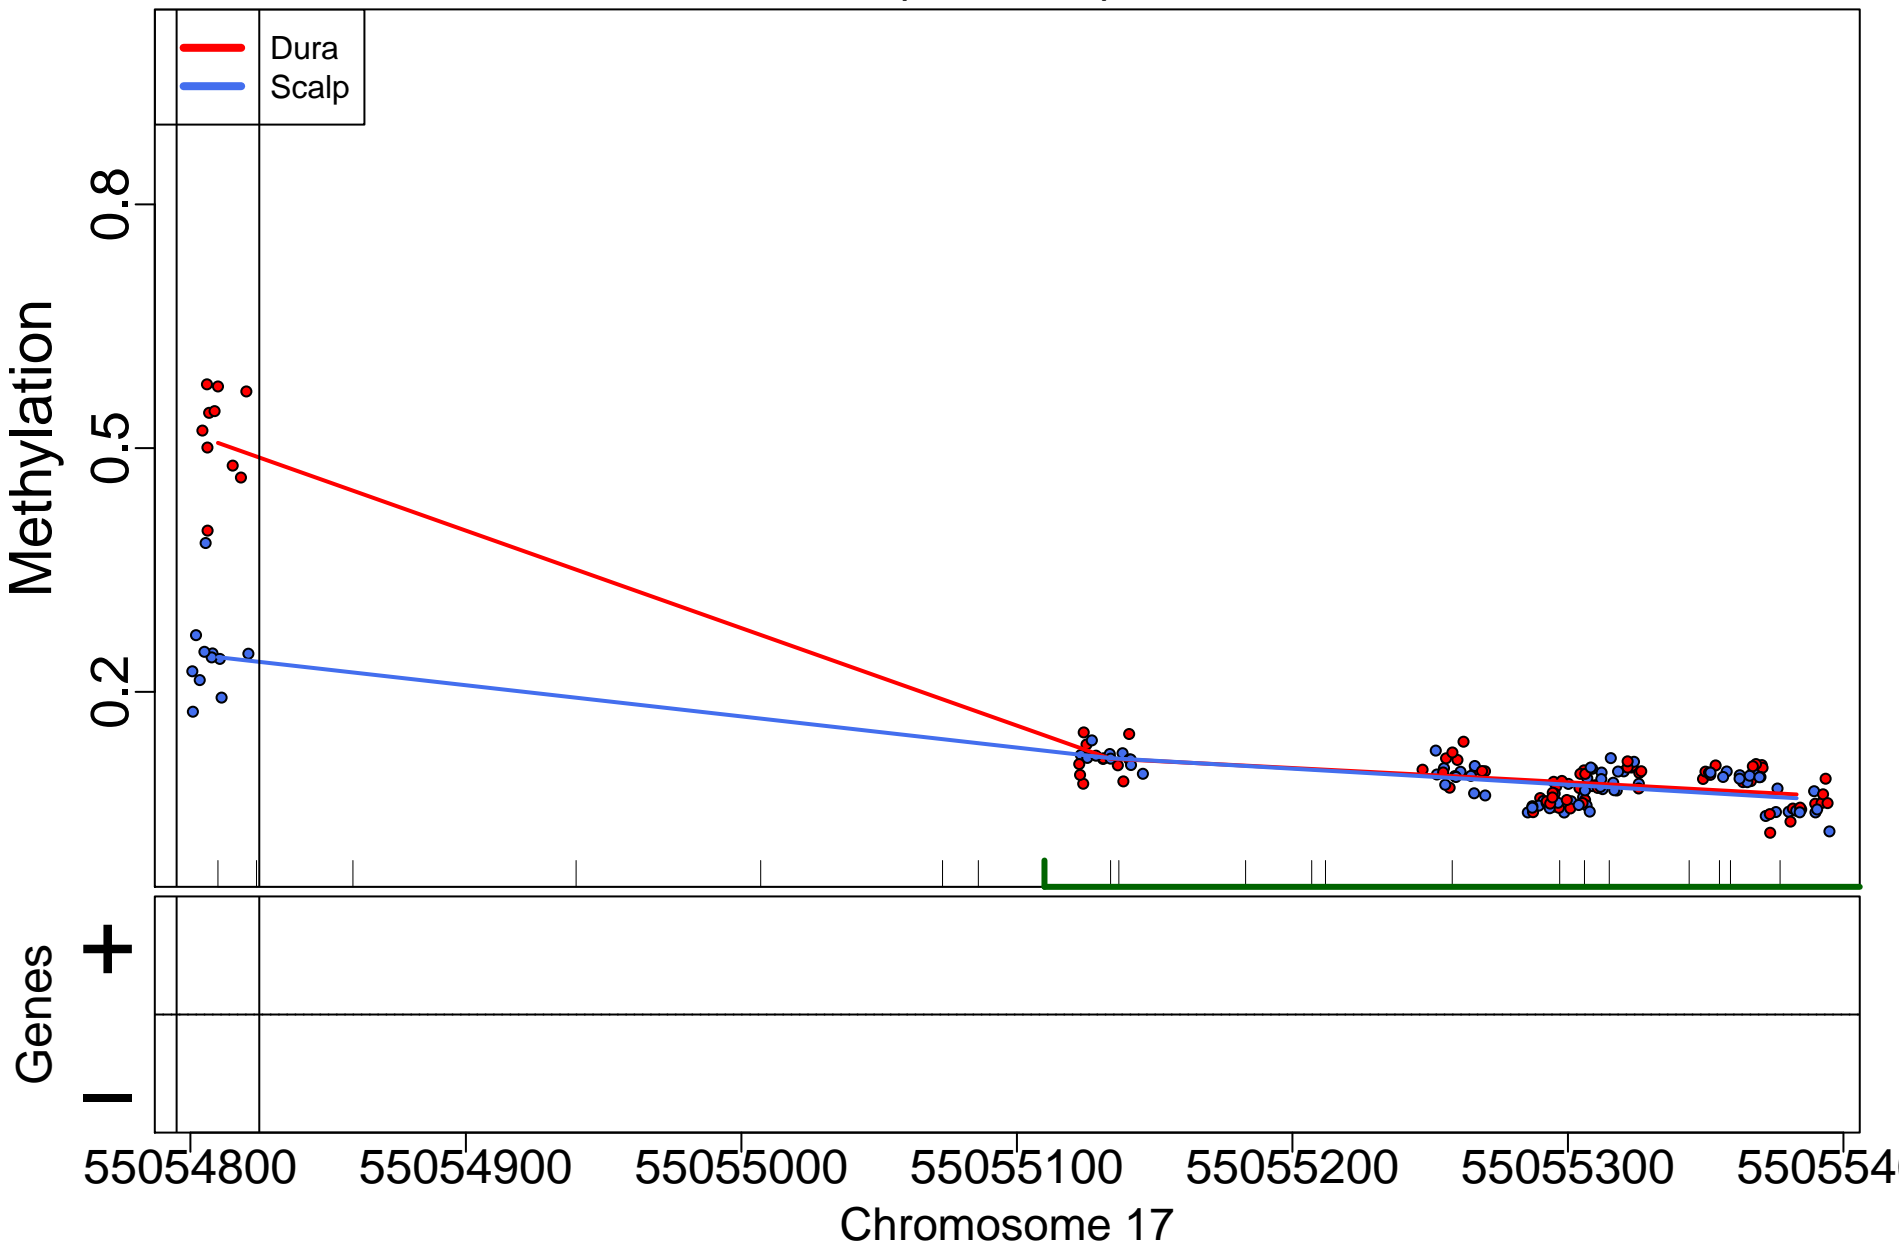

KIF7; 497bp from tss:promoter

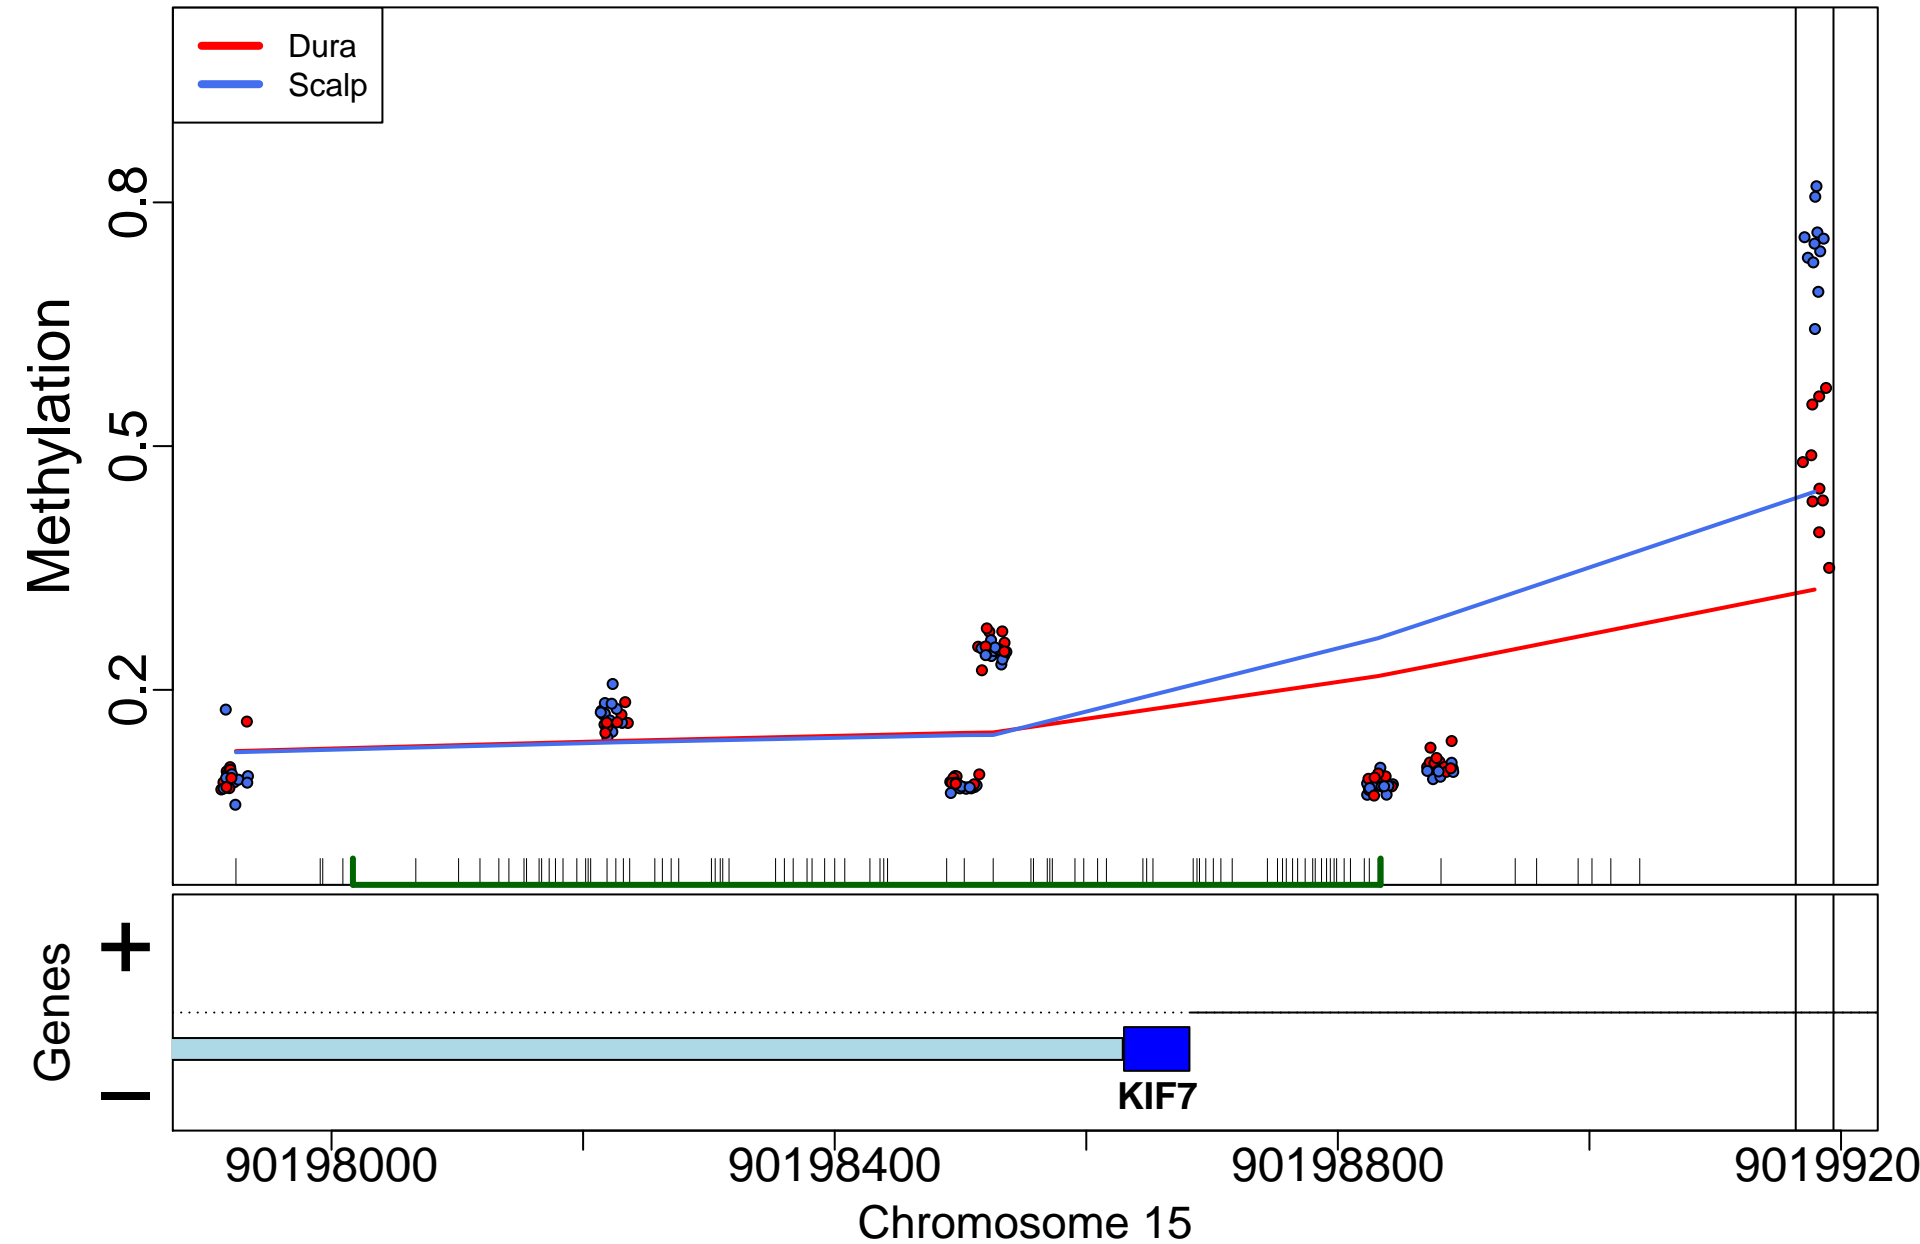



B3GALNT1; 155bp from tss:promoter

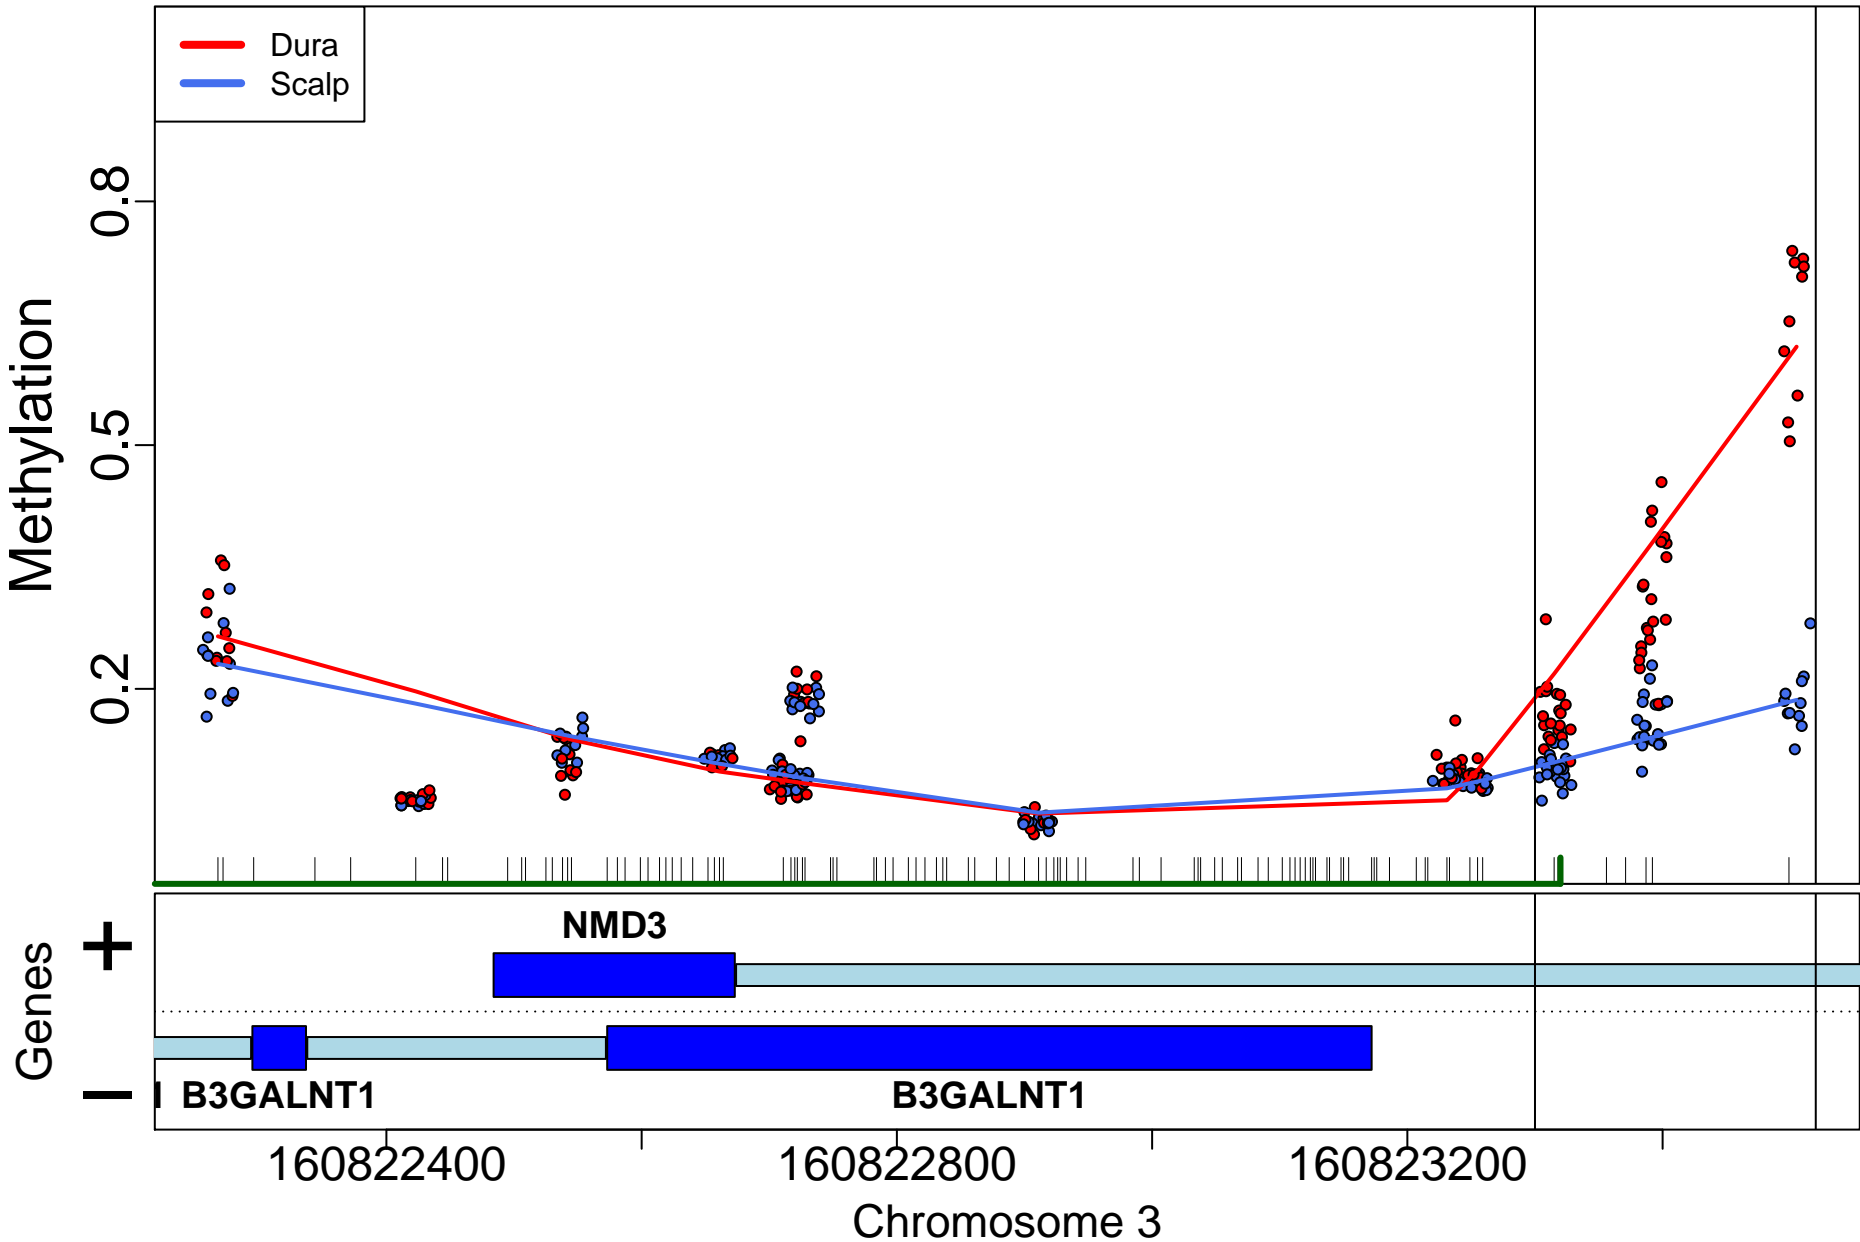

# MUC2; 118bp from tss:promoter

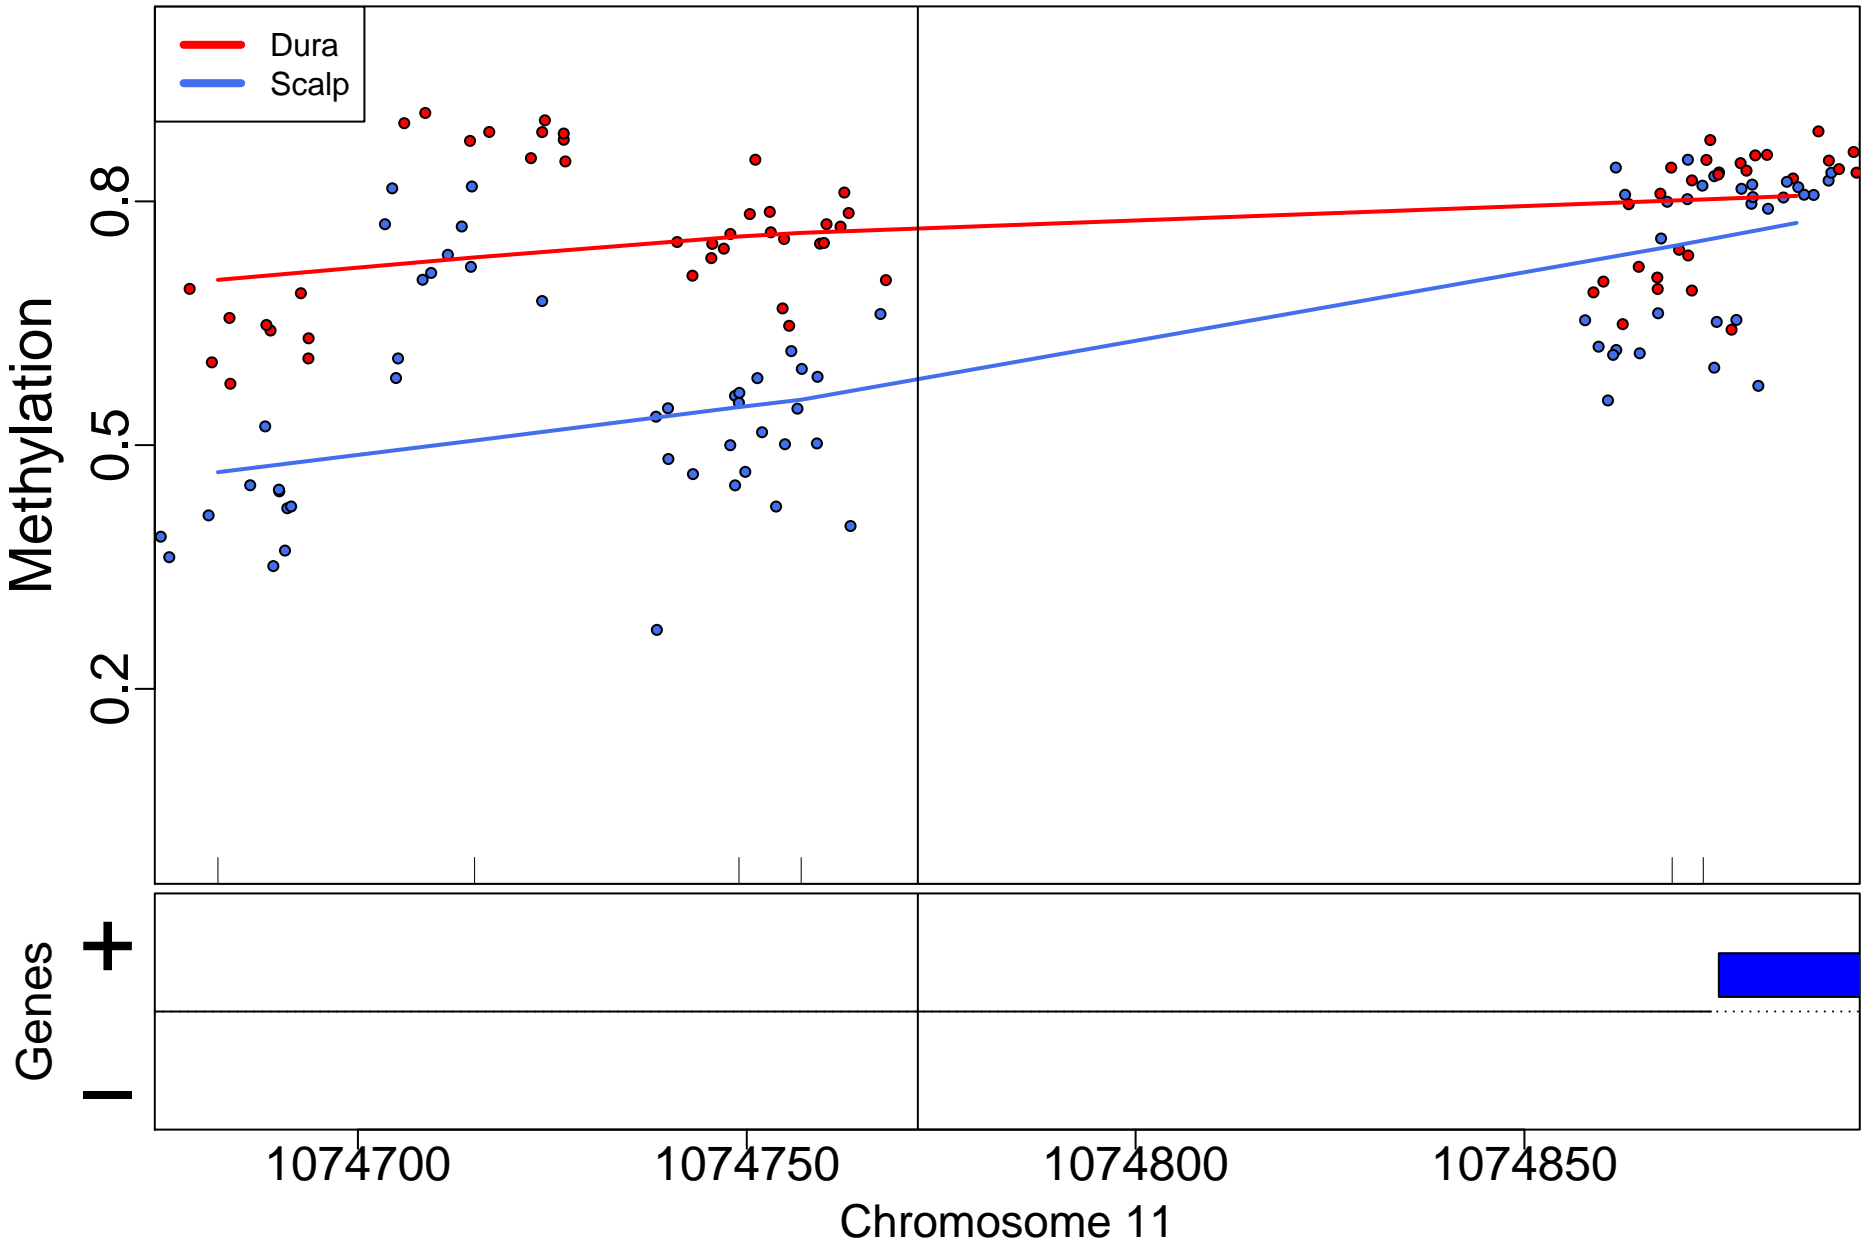

AMPD3; 0bp from tss:NA

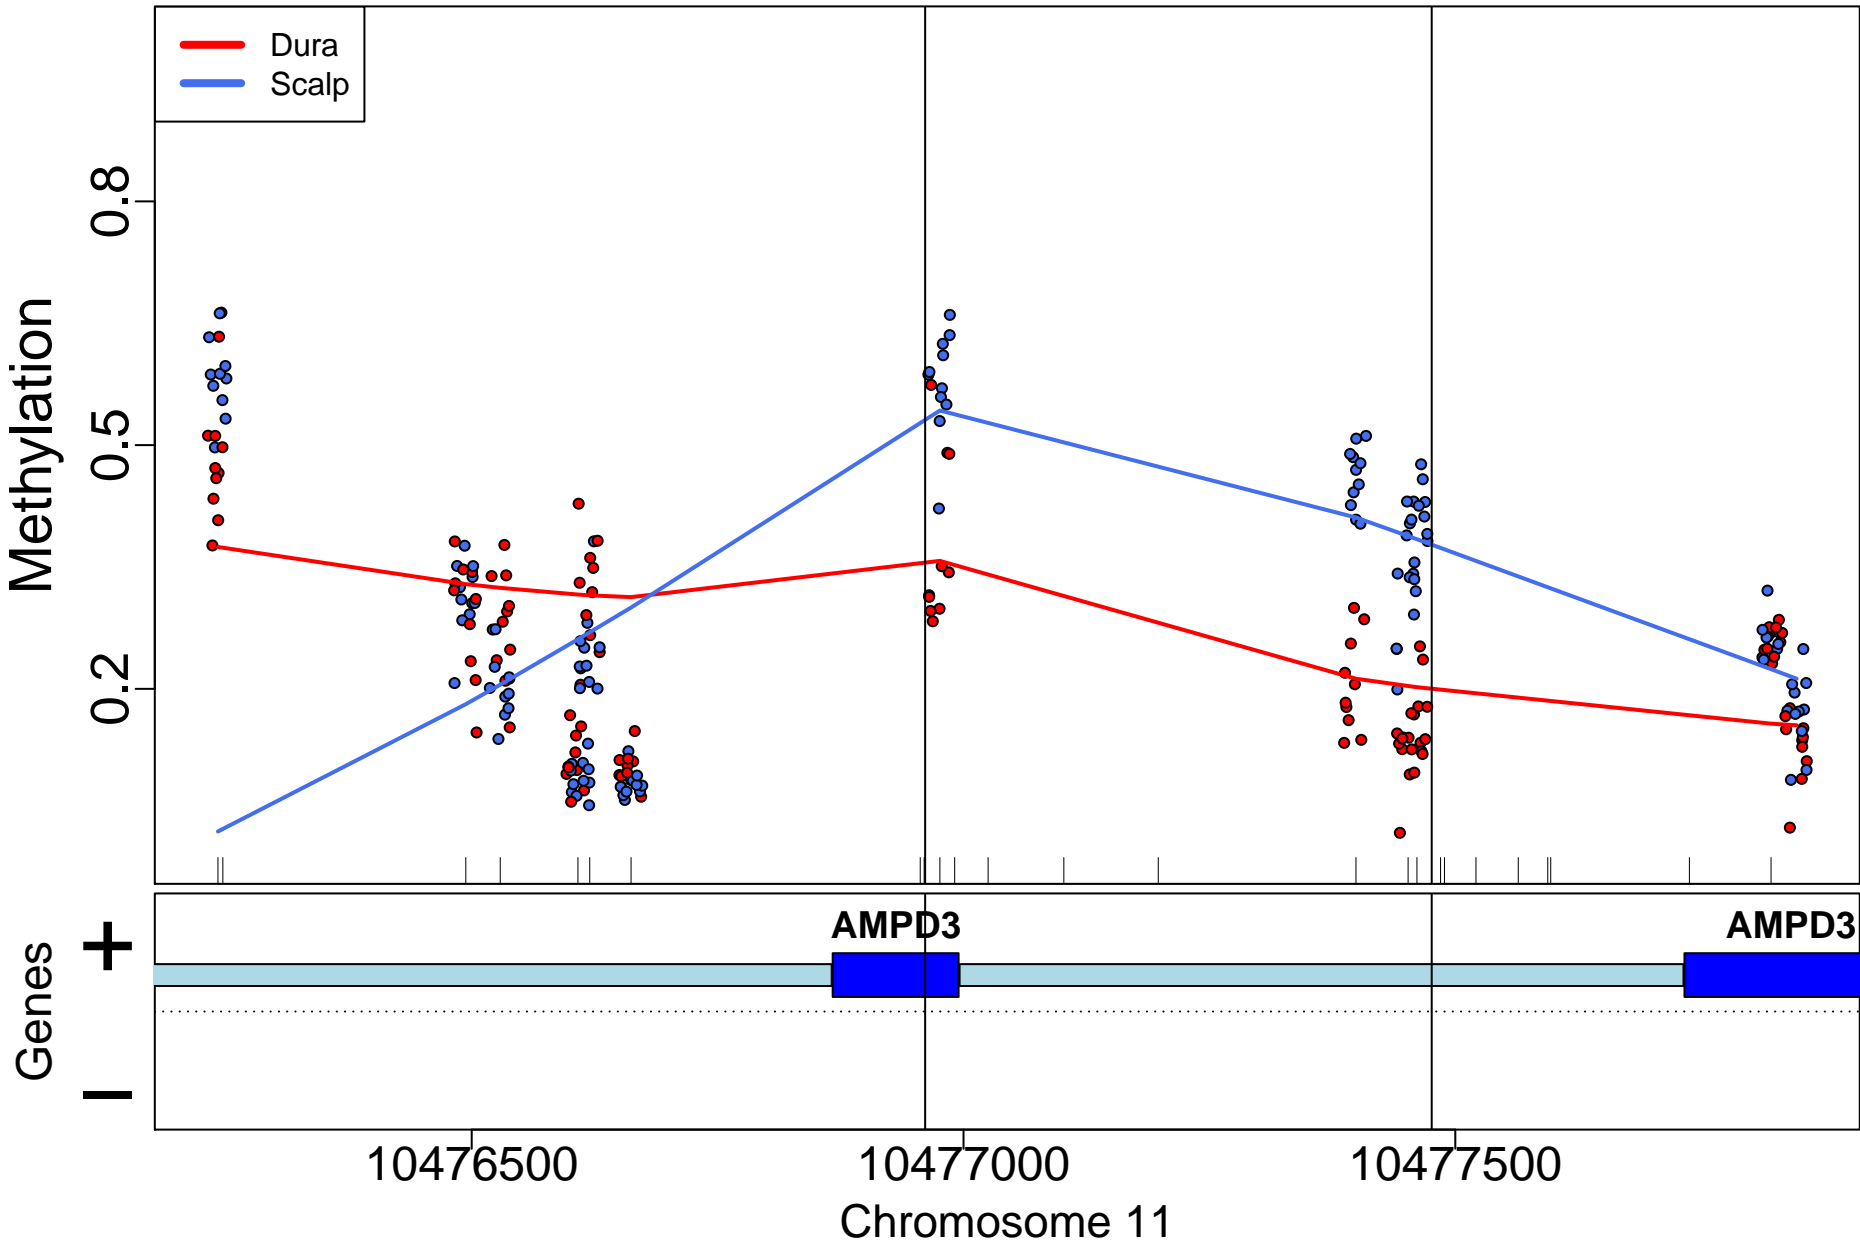

CDKN2C; 8bp from tss:inside exon

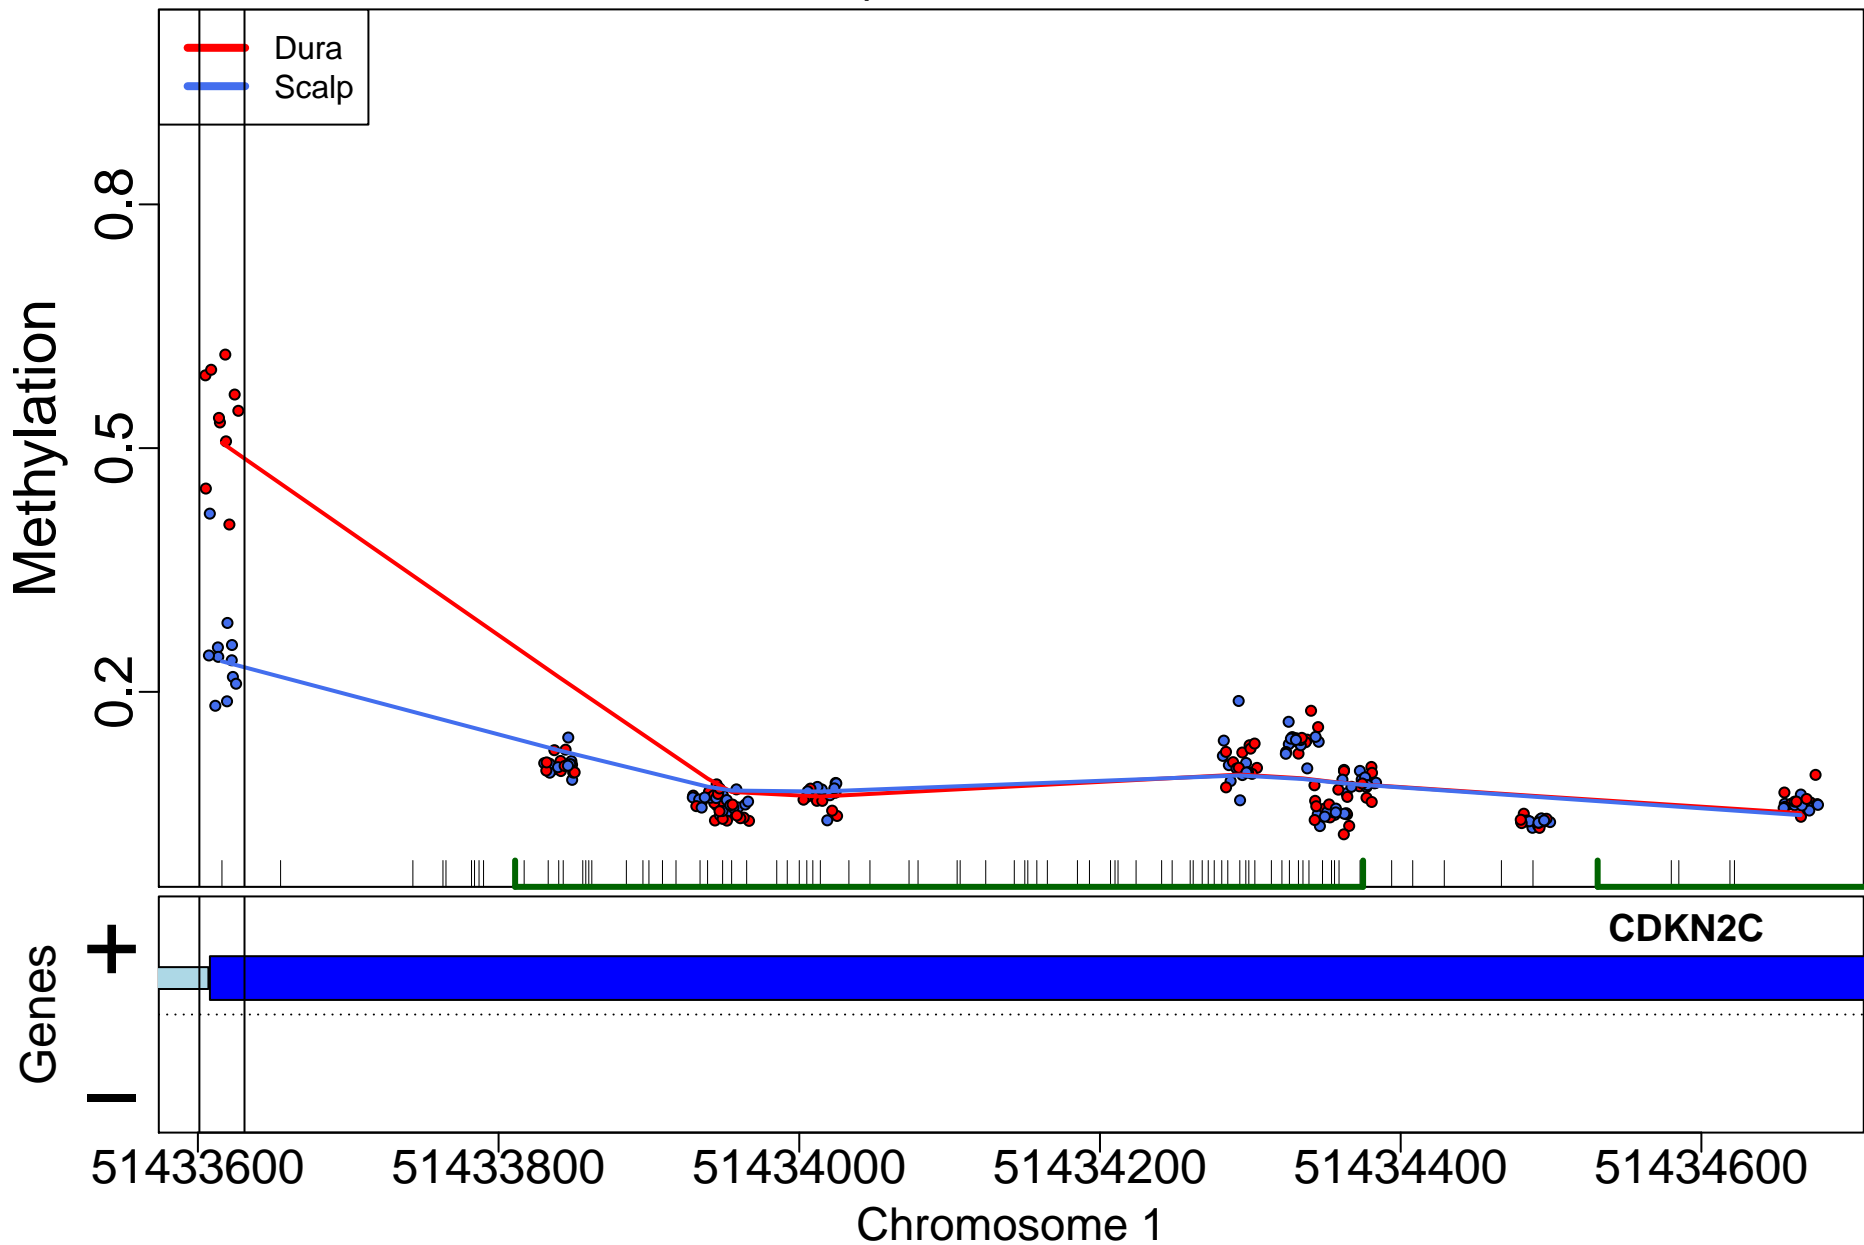

C7orf50; 93102bp from tss:inside intron

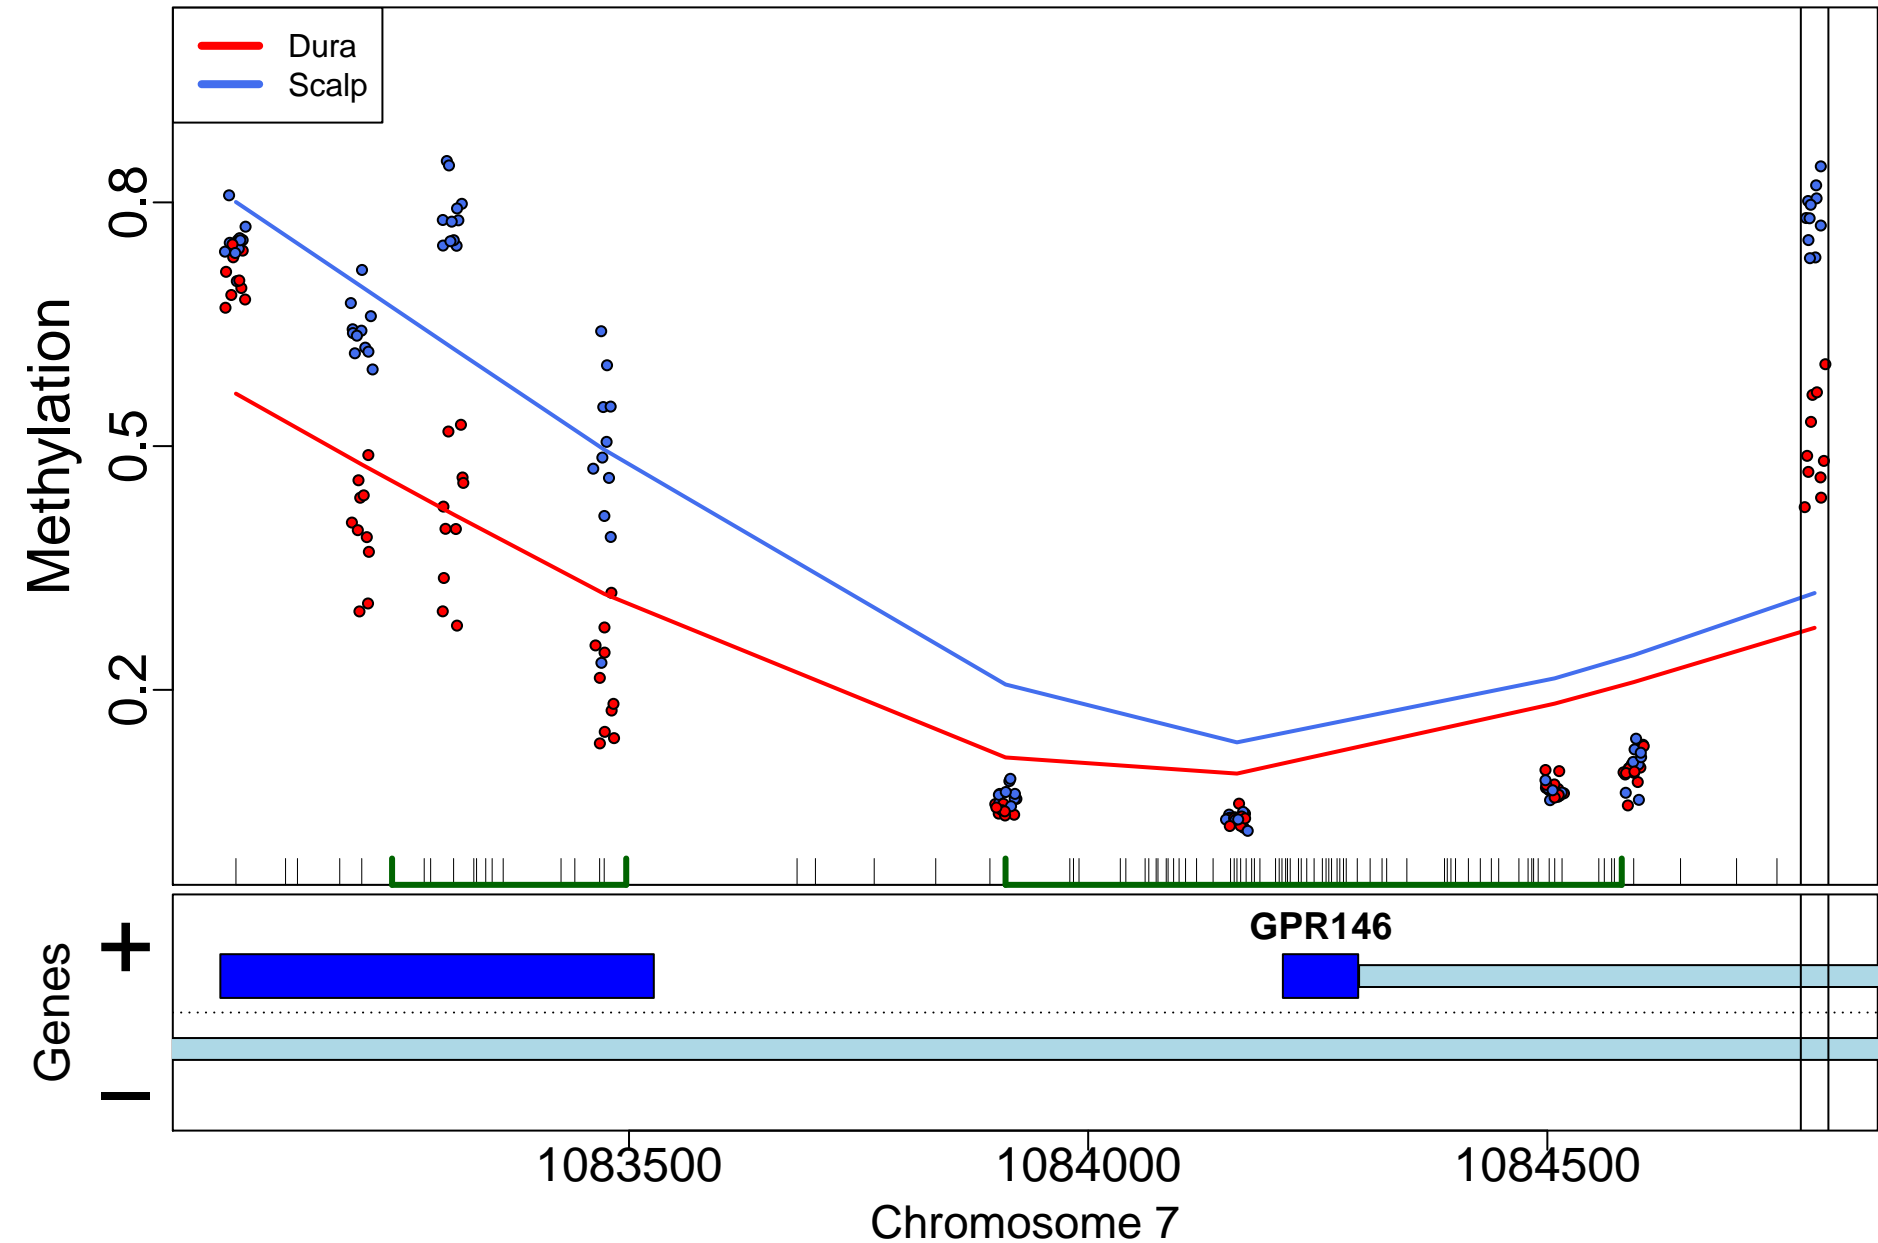

FZD6; 926bp from tss:inside intron

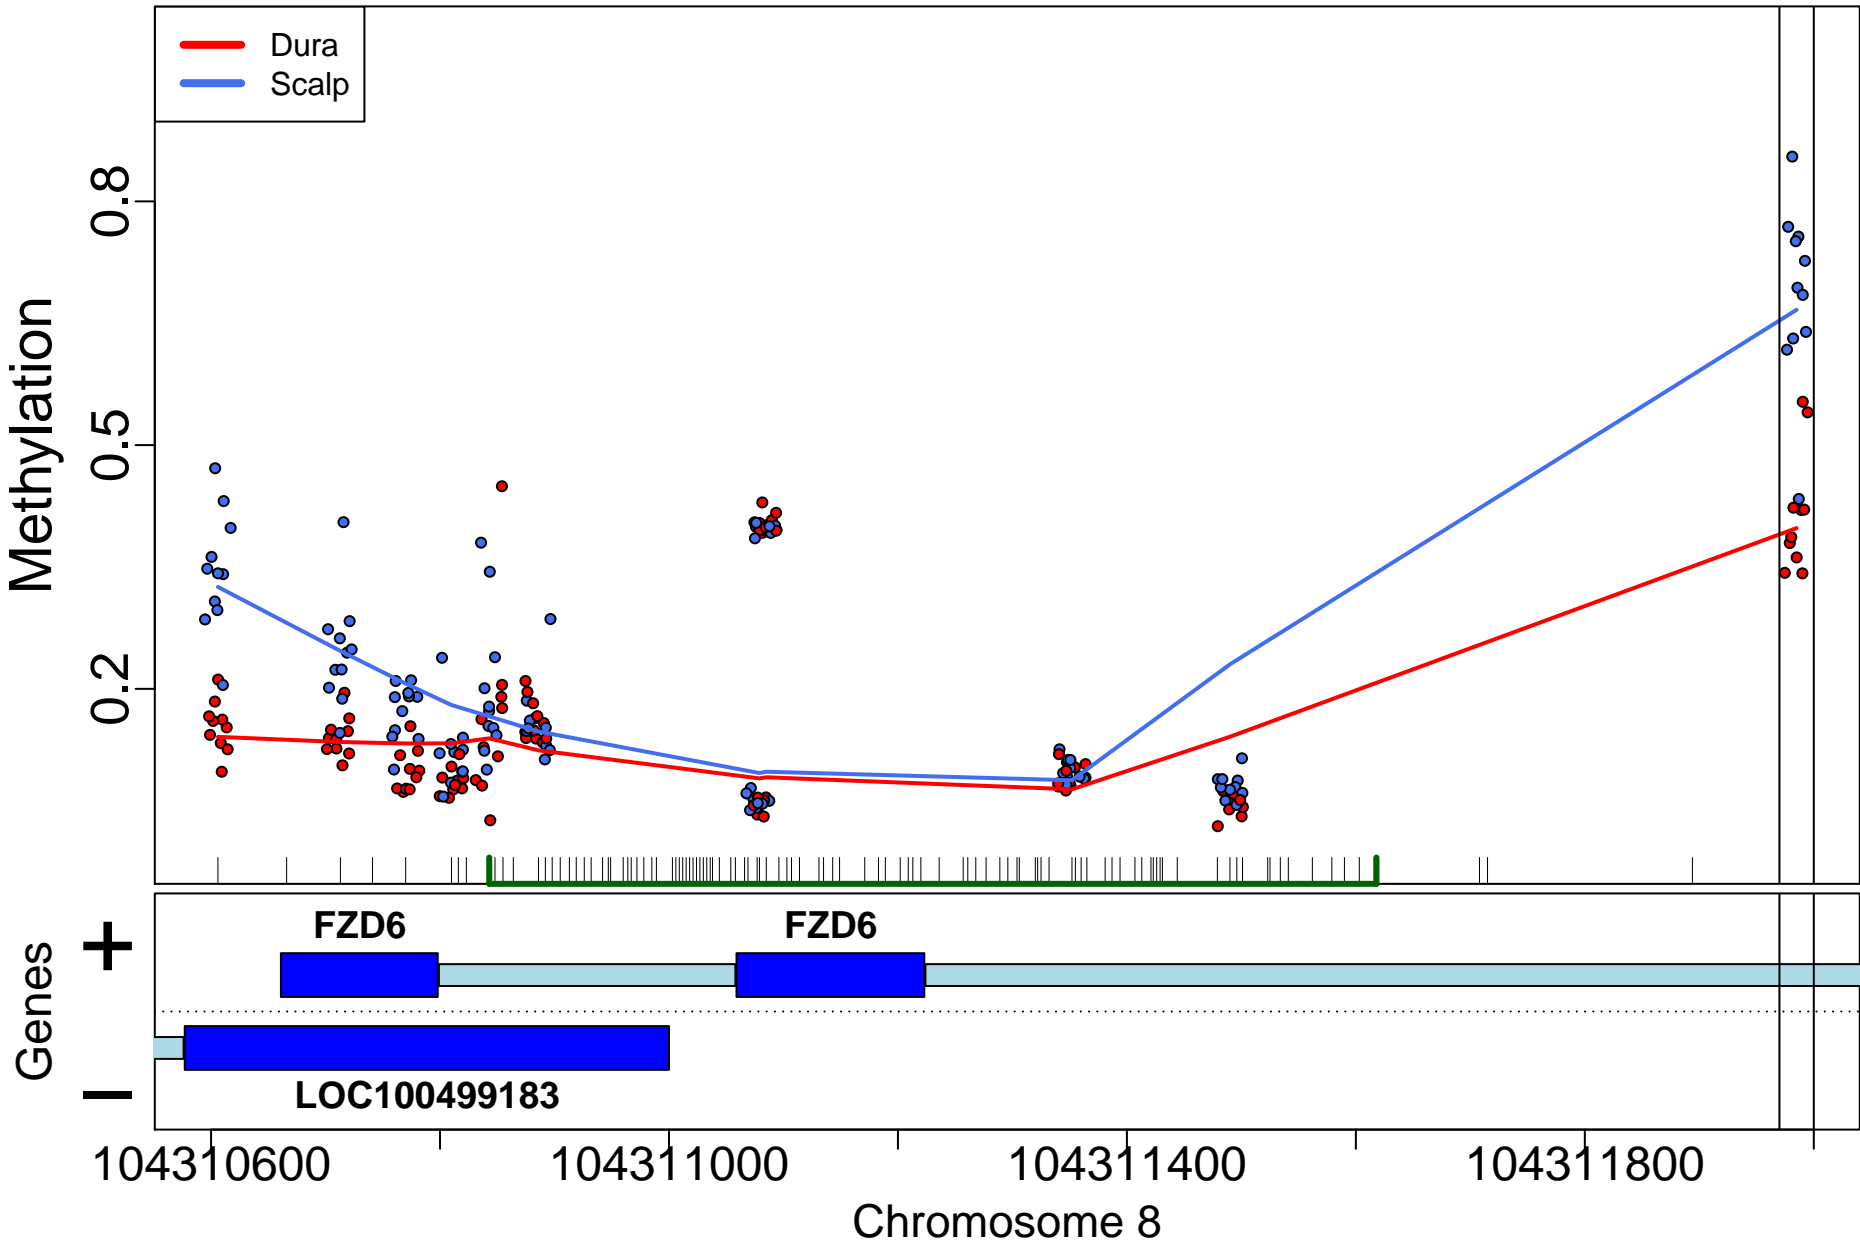

# KCNE3; 84bp from tss:promoter

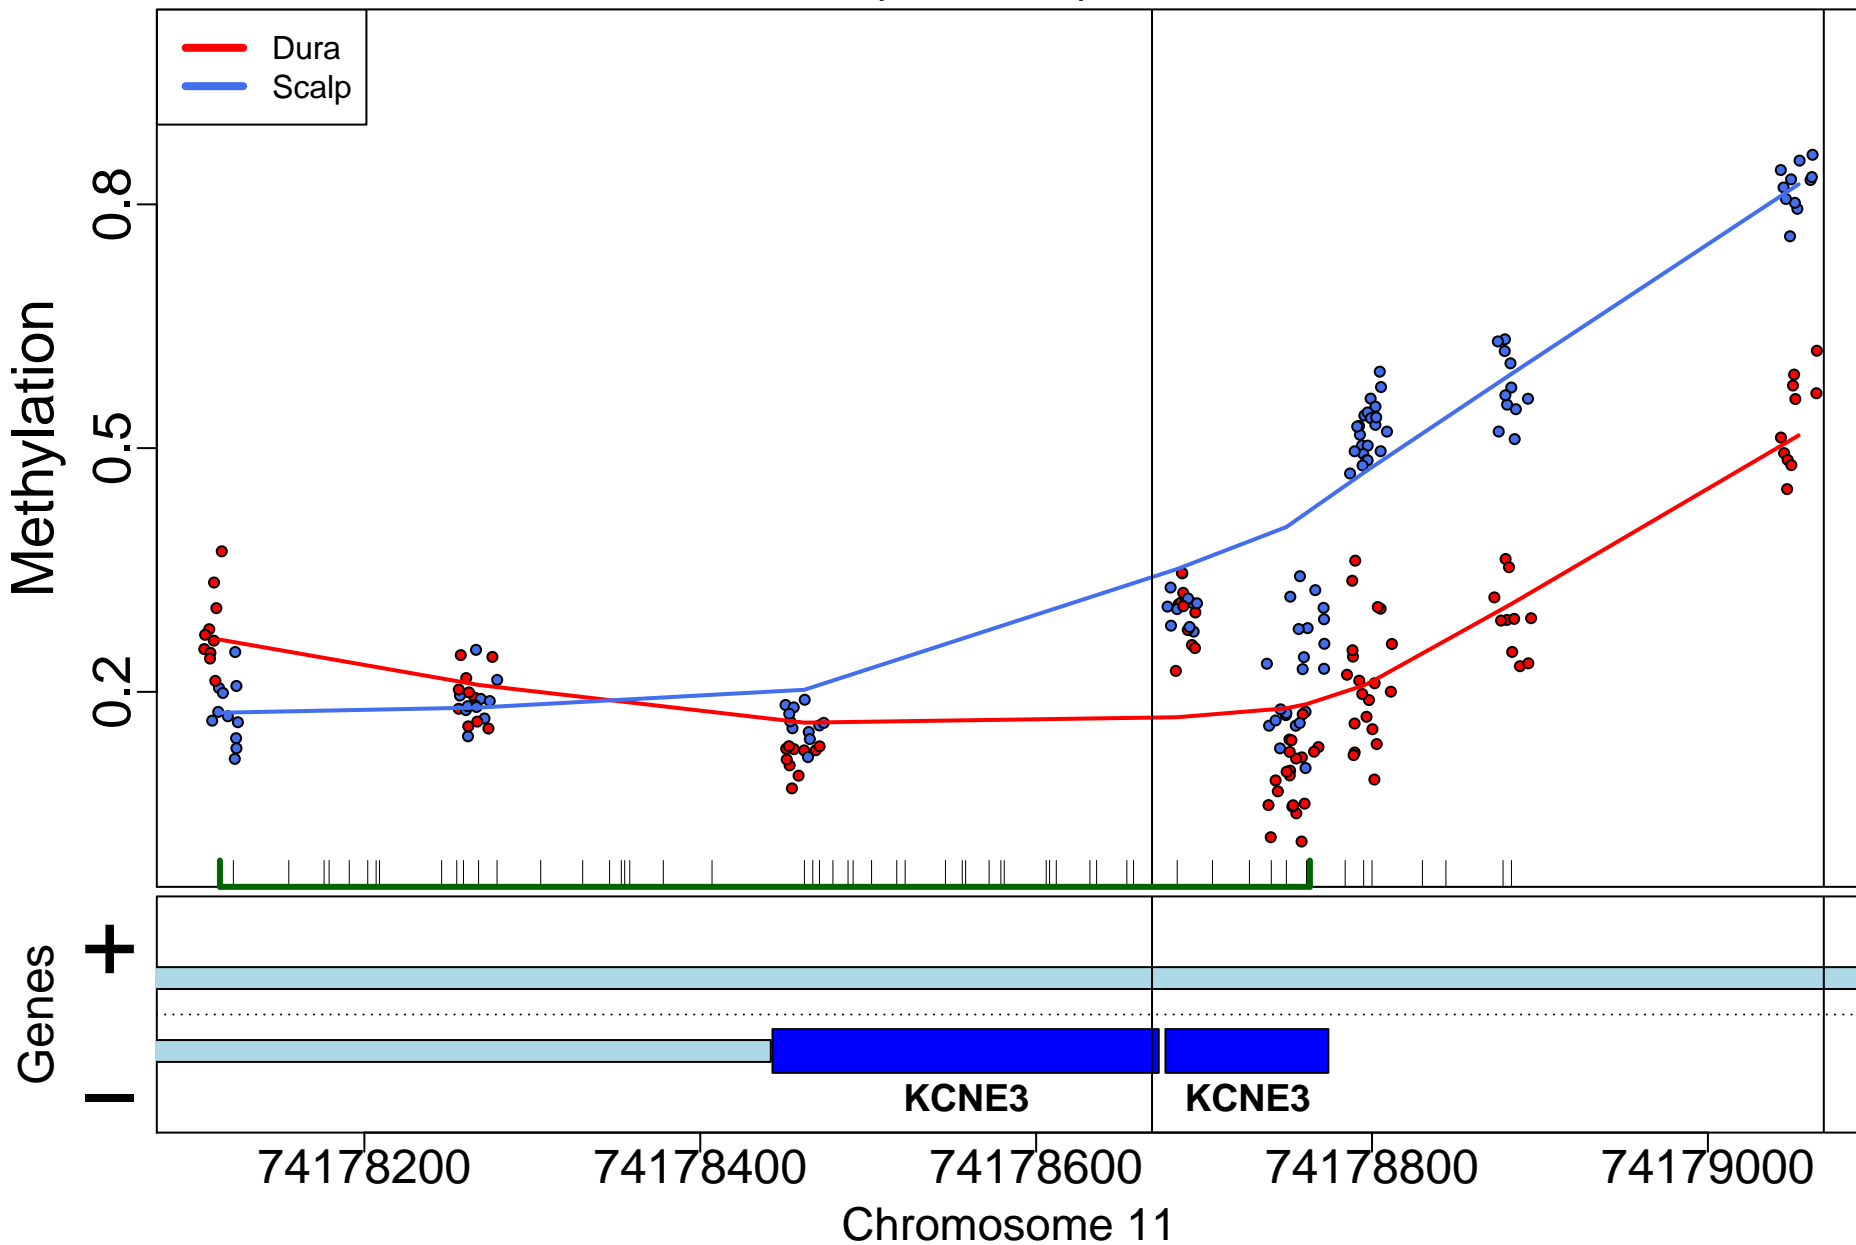

LRRC28; 187334bp from tss:downstream

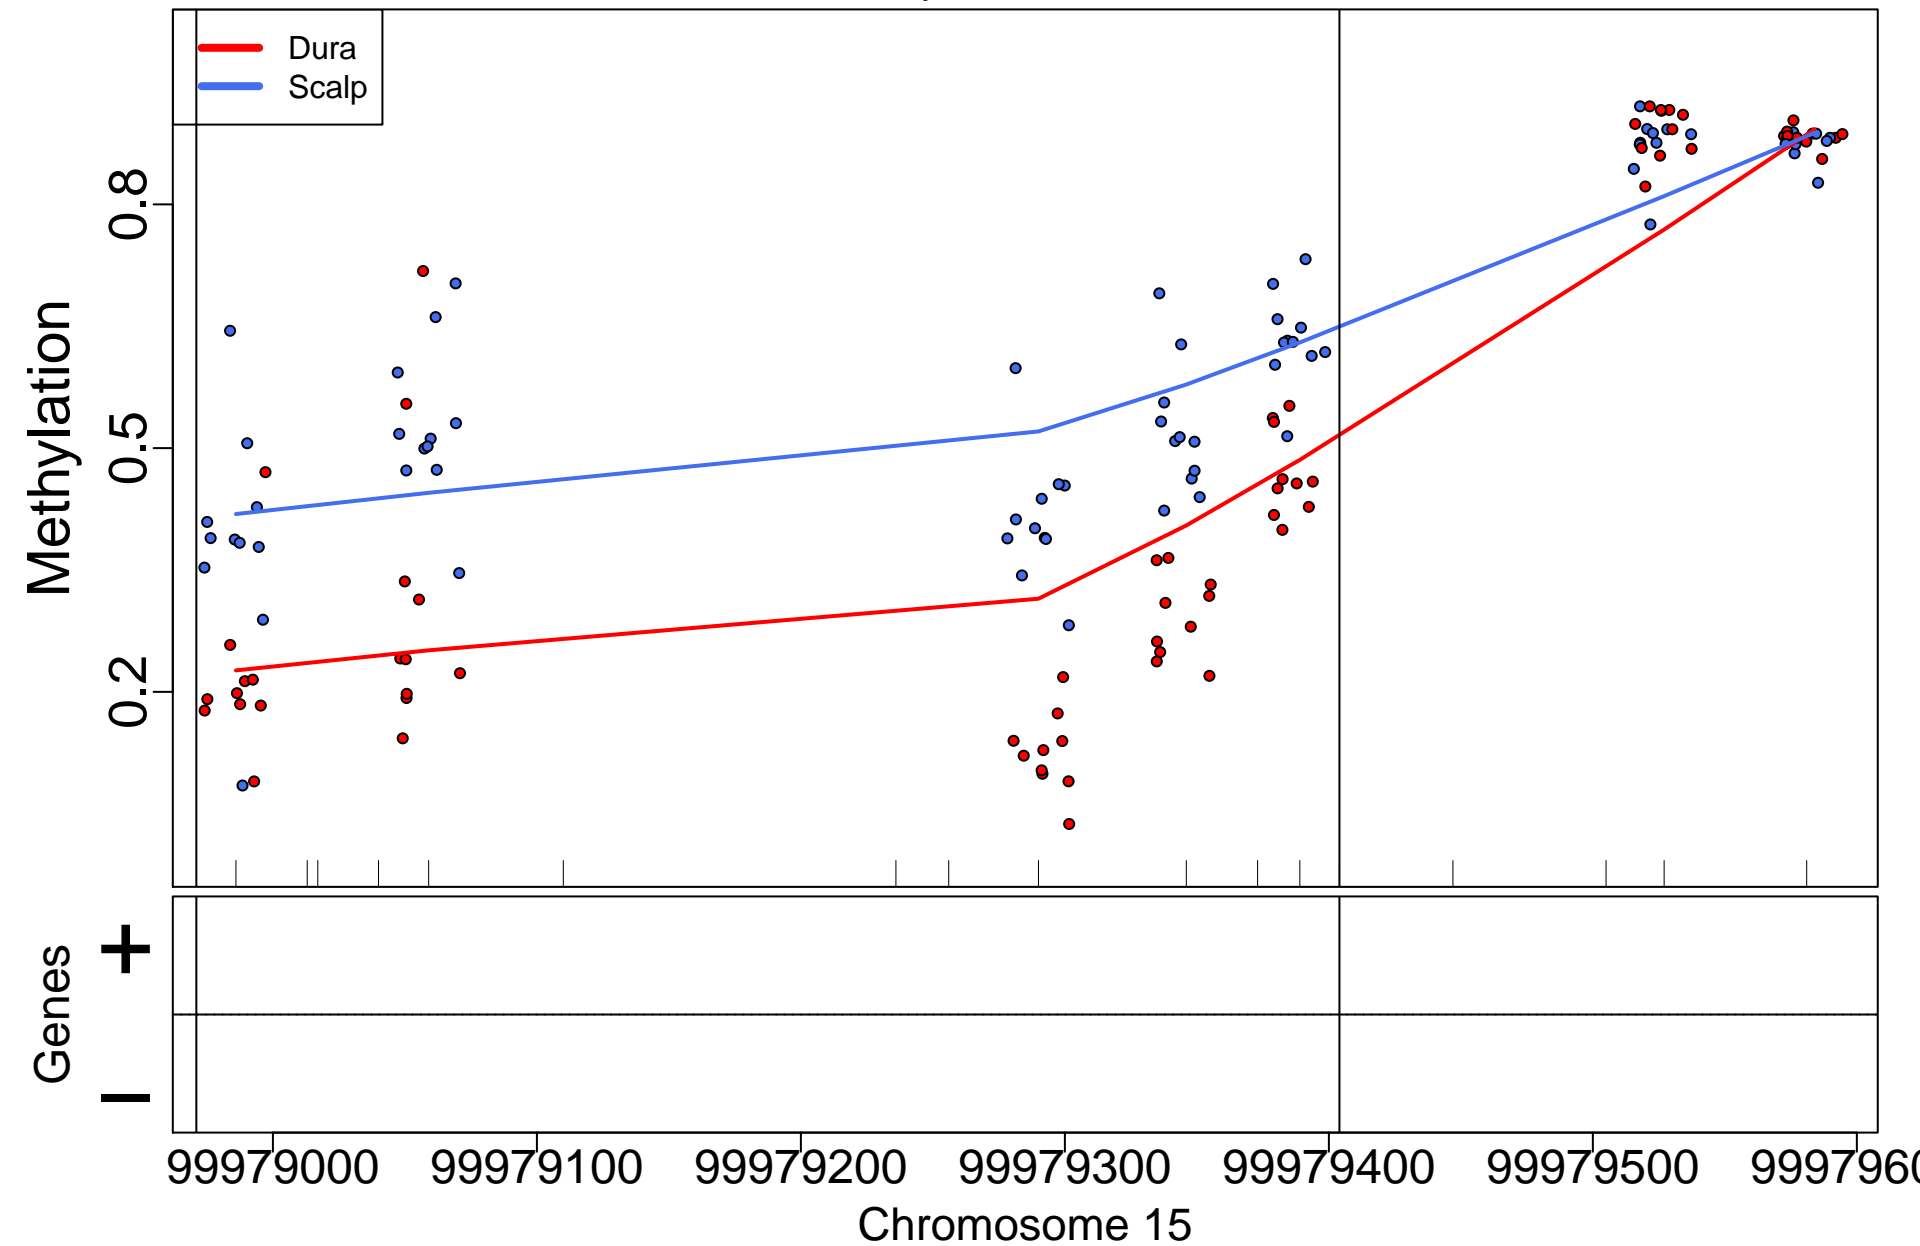



CBFA2T3; 7972bp from tss:inside intron

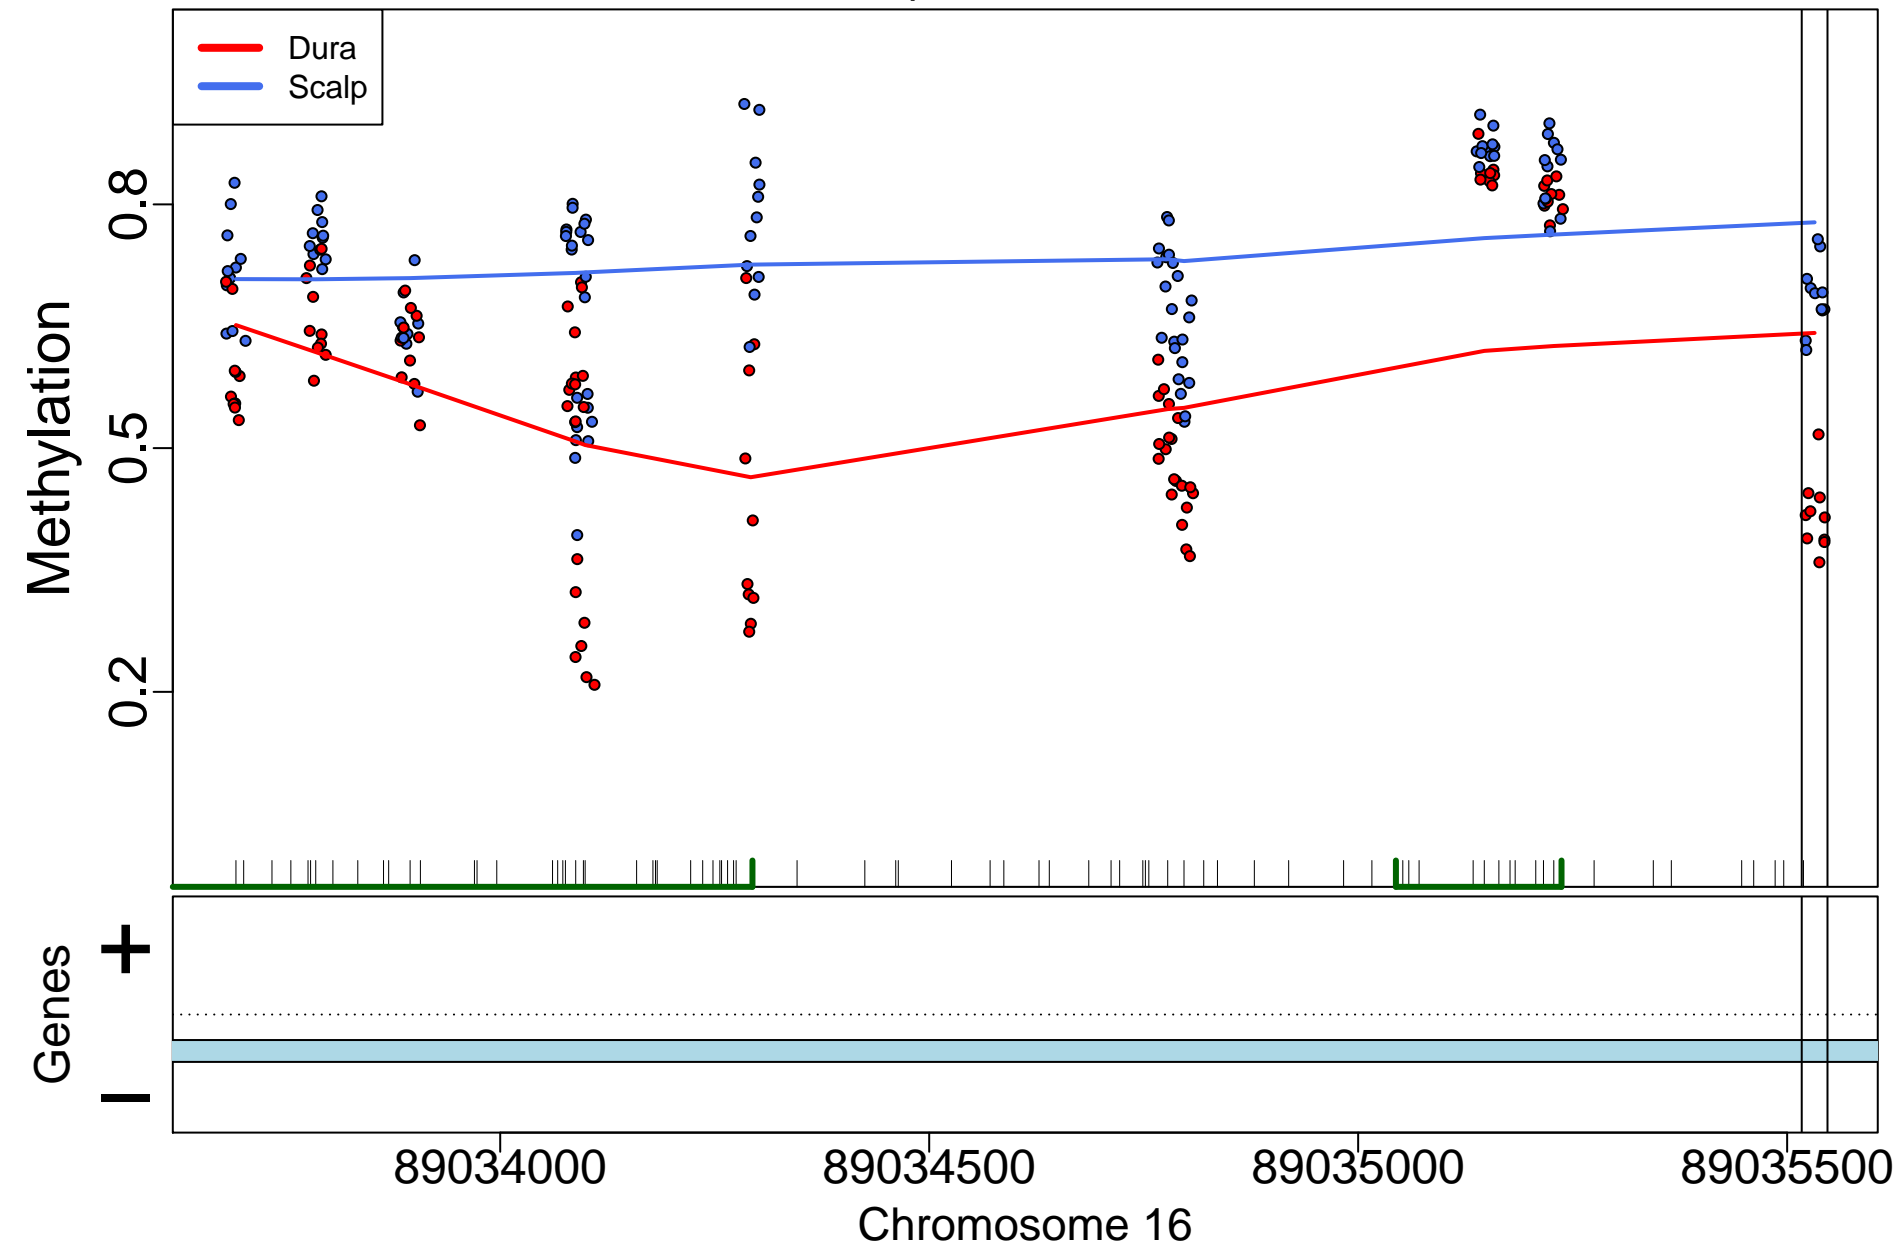

Supplement: S2 (10.1371/journal.pgen.1005819.s002) [file journal.pgen.1005819.s002]
